# Supplementary material for: Proof of concept study to develop a novel connectivity-based electric-field modelling approach for individualized targeting of transcranial magnetic stimulation treatment
Source: PubMed Central journal article supplement (PMC8674270; doi:10.1038/s41386-021-01110-6), 2021-07-28

**Title:** Proof of concept study to develop a novel connectivity-based electric-field modelling approach for individualized targeting of transcranial magnetic stimulation treatment

**Running title:** Novel modelling approach for individualized TMS targeting

**Authors:** Nicholas L Balderston<sup>1</sup>, Joanne C Beer<sup>2</sup>, Darsol Seok<sup>1</sup>, Walid Makhoul<sup>1</sup>, Zhi-De Deng<sup>3</sup>, Tommaso Girelli<sup>1</sup>, Marta Teferi<sup>1</sup>, Nathan Smyk<sup>1</sup>, Marc Jaskir<sup>1</sup>, Desmond J Oathes<sup>1</sup>, & Yvette I Sheline<sup>1</sup>

1. Center for Neuromodulation in Depression and Stress  
Department of Psychiatry  
University of Pennsylvania  
Philadelphia, PA, USA
2. Penn Statistics in Imaging and Visualization Center  
Department of Biostatistics, Epidemiology & Informatics  
University of Pennsylvania  
Philadelphia, PA, USA
3. Noninvasive Neuromodulation Unit  
National Institute of Mental Health  
Bethesda, MD, USA

**Corresponding Author:**

Nicholas Balderston  
Center for Neuromodulation in Depression and Stress  
3700 Hamilton Walk, Richards D302  
Philadelphia, PA, 19104  
Phone: 215-746-3058  
Fax: 215-573-8556  
[nicholas.balderston@penntmedicine.upenn.edu](mailto:nicholas.balderston@penntmedicine.upenn.edu)

**Keywords:** Transcranial Magnetic Stimulation, resting state, functional connectivity, electric field modelling, depression, anxiety, anxious misery



## Supplemental Methods

### MRI Scans

MRI data was acquired as part of the Dimensional Connectomes of Anxious Misery project <sup>1</sup>, one of the Connectomes Related to Human Diseases (CRHD) studies (<https://www.humanconnectome.org/disease-studies>). Participants were scanned on a Siemens Prisma 3T using a 64-channel head coil. Structural T1-weighted images were acquired using a magnetization-prepared rapid acquisition with gradient echo (MPRAGE) sequence with TR=2400ms, TE=2.22ms and flip angle of 8 degrees. 208 slices were acquired with a voxel resolution of 0.8mm isometric, resulting in an FOV of 256 x 240 x 167mm. T2-weighted images were acquired using a variable-flip-angle turbo-spin echo (TSE) sequence with TR=3200ms and TE=563ms, with the same voxel resolution and FOV as the T1w acquisition. Resting state fMRI data were acquired with a multi-band acceleration of 8, TR=800ms, TE=37ms and flip angle of 52 degrees. Whole-brain coverage was achieved with 72 slices and a voxel resolution of 2.0mm isometric, resulting in an FOV of 208 x 208 x 144mm. Each resting state scan was paired with another run with the opposite phase encoding direction (AP-PA), and two such pairs were acquired, resulting in 22:24 minutes of data (5:46 min x 4 runs) for each participant. Spin echo field maps were also acquired in opposite phase encoding directions in order to correct susceptibility distortions. During the resting state scan, participants were shown a white screen with a black crosshair in the center and were instructed to remain still with their eyes open and to blink normally.

### MRI preprocessing

**Computational head modelling for e-field calculations.** We used the SimNIBS (Version 2.1) software package to generate 3D head and coil geometries using the finite element

method (FEM)<sup>2</sup>. Individualized head models were created using T1 and T2 structural MRIs that were segmented into scalp (mri2mesh), skull, CSF, gray matter, and white matter volumes, then converted to tetrahedral meshes using a Gmsh subroutine packaged in SimNIBS<sup>3</sup>.

**E-field calculations.** E-field models were conducted for each site/orientation combination (See Below), and E-norm (i.e. magnitude) component of the electric field at each surface node was used to model the potential TMS effects<sup>4</sup>.

### **fMRI preprocessing**

Data were preprocessed using the Human Connectome Project Pipelines v4.0.1 (retrieved from <https://github.com/Washington-University/HCPpipelines/releases/tag/v4.0.1>). A full description of preprocessing steps is provided elsewhere<sup>5</sup>. In brief, anatomical preprocessing steps included gradient nonlinearity distortion correction, co-registration of T1w and T2w images, bias-field correction using spin-echo field maps and spatial normalization to the Montreal Neurological Institute (MNI) template. Functional image preprocessing steps included removal of spatial distortions via gradient nonlinearity corrections, correction of participant motion through volume realignment, susceptibility distortion correction using dual-phase encoded spin-echo corrections, registration of fMRI data to T1 space, subsequent transformation to MNI-space and removal of extra-parenchymal voxels.

Timeseries analyses using volumetric data were further conducted using the eXtensible Connectivity Pipeline (XCP Engine)<sup>6</sup>. The workflow is summarized as follows: (i) removal of the 10 initial volumes (8 seconds) to achieve signal stabilization, (ii) demeaning and removal of quadratic trends using a general linear model to account for scanner drift, (iii) intensity despiking using 3dDespike from AFNI<sup>7</sup>, (iv) bandpass temporal filtering of time series between 0.01 Hz and 0.08Hz using a first-order Butterworth filter<sup>8</sup>, (v) regression of nine confounding signals

(six motion parameters + global signal + mean white matter signal + mean cerebral spinal fluid signal) and as well as the temporal derivative, quadratic term and temporal derivatives of each quadratic term (resulting in 36 regressors total) <sup>9</sup>, and (vi) spatial smoothing with SUSAN from FSL <sup>10</sup> using a 6mm FWHM kernel. Voxelwise timeseries were then downsampled to the 333 parcels in the Gordon atlas <sup>11</sup> and pairwise interparcel connectivity was calculated using Z-transformed Pearson correlations.

**Image quality assessment.** MRI data was acquired as part of the Dimensional Connectomes of Anxious Misery project. More detailed image quality reports can be obtained in the Seok et al., (2020) <sup>1</sup>. In brief, whole brain tSNR for the resting state data averaged  $32.17 \pm 5.67$  for the AM group and  $31.58 \pm 4.94$  for the HC group. Finally, motion (RMS across TRs) averaged  $0.16 \pm 0.08$  mm for the AM group and  $0.14 \pm 0.06$  for the HC group. Importantly, SNR, tSNR and motion was similar across groups and comparable to what was observed in the human connectome project, which used similar scans.

## Appendix: Equations

### Connectivity based model: PCA regression

Let  $\mathbf{Y}^{mood}$  be the  $n \times 1$  vector of behavioral symptom scores (e.g., MADRS scores) for  $n$  participants. We assume the behavioral symptom scores can be predicted using a linear combination of connectivity measures, according to the model

$$\mathbf{Y}^{mood} = \mathbf{X}\boldsymbol{\beta} + \boldsymbol{\epsilon} \quad (Eq. A1)$$

where  $\mathbf{X}$  is a  $n \times p$  matrix such that each row consists of one participant's concatenated unique connectivity values from the Z-transformed Pearson correlation functional connectivity matrix, i.e., the upper or lower triangular portion of the  $N \times N$  connectivity matrix ( $p = N(N - 1)/2$ ), for the Gordon atlas,  $N = 333$ );  $\boldsymbol{\beta}$  is a  $p \times 1$  vector of coefficients, and  $\boldsymbol{\epsilon}$  is a  $n \times 1$  vector of error terms. We assume that  $\mathbf{Y}^{mood}$  and columns of  $\mathbf{X}$  have been centered so as to have zero empirical means.

We perform principal components analysis (PCA) on the predictor matrix  $\mathbf{X}$ . Let  $\mathbf{X} = \mathbf{U}\boldsymbol{\Delta}\mathbf{V}^T$  denote the singular value decomposition of  $\mathbf{X}$ , where  $\boldsymbol{\Delta}_{p \times p} = \text{diag}(\delta_1, \dots, \delta_p)$  is a diagonal matrix of non-negative singular values, and columns of  $\mathbf{U}_{n \times p}$  and  $\mathbf{V}_{p \times p}$  are orthonormal sets of vectors, i.e., the left and right singular vectors of  $\mathbf{X}$ . The spectral decomposition of  $\mathbf{X}$  is given by  $\mathbf{V}\boldsymbol{\Lambda}\mathbf{V}^T$ , where  $\boldsymbol{\Lambda}_{p \times p} = \text{diag}(\lambda_1, \dots, \lambda_p) = \text{diag}(\delta_1^2, \dots, \delta_p^2) = \boldsymbol{\Delta}^2$  is a diagonal matrix of the non-negative eigenvalues of  $\mathbf{X}^T\mathbf{X}$  and columns of  $\mathbf{V}_{p \times p} = [\mathbf{v}_1, \dots, \mathbf{v}_p]$  are the corresponding eigenvectors. The  $j^{\text{th}}$  principal component and  $j^{\text{th}}$  principal component direction (i.e., PCA loading) corresponding to the  $j^{\text{th}}$  largest eigenvector are  $\mathbf{X}\mathbf{v}_j$  and  $\mathbf{v}_j$ , respectively, for each  $j \in \{1, \dots, p\}$ .

For PCA regression (PCR), we use the first  $k \leq n$  components as predictors. Let  $\mathbf{V}_k$  represent the  $p \times k$  matrix comprising the first  $k$  columns of  $\mathbf{V}$ , and  $\mathbf{W}_k = \mathbf{X}\mathbf{V}_k$  be the  $n \times k$  matrix with the first  $k$  principal components as columns. We estimate regression coefficients  $\boldsymbol{\gamma}_k$  in  $\mathbf{Y}^{mood} = \mathbf{W}_k\boldsymbol{\gamma}_k + \boldsymbol{\epsilon}_k$  (Eq. A2) by ordinary least squares, i.e.,  $\boldsymbol{\gamma}_k = (\mathbf{W}_k^T\mathbf{W}_k)^{-1}\mathbf{W}_k^T\mathbf{Y}^{mood} \in \mathbb{R}^k$ . Then the PCR estimator of  $\boldsymbol{\beta}$  based on the first  $k$  principal components is given by  $\hat{\boldsymbol{\beta}}_k = \mathbf{V}_k\hat{\boldsymbol{\gamma}}_k \in \mathbb{R}^p$  (Eq. A3).

### E-field augmented model

Once  $\widehat{\boldsymbol{\beta}}_k$  is obtained from the connectivity based model, the e-field augmented model will be used to identify the optimal coil orientation and stimulation sites to generate the greatest reduction in behavioral symptom score for each participant. Let  $\Delta \mathbf{Y}^{mood}$  be the  $n \times 1$  vector of changes in score between the pre- and post-treatment assessments for  $n$  participants. We model  $\Delta \mathbf{Y}^{mood}$  as follows:

$$\Delta \mathbf{Y}^{mood} = \mathbf{Y}_{post}^{mood} - \mathbf{Y}_{pre}^{mood} = (\mathbf{X}_{post} - \mathbf{X}_{pre})\boldsymbol{\beta} + \boldsymbol{\epsilon}' \text{ (Eq. A4),}$$

where  $\boldsymbol{\epsilon}' = \boldsymbol{\epsilon}_{post} - \boldsymbol{\epsilon}_{pre}$ .

For each site and orientation  $l$ , let  $\mathbf{E}_l$  be a  $n \times p$  matrix, where rows correspond to participants, columns correspond to pairs of regions in the Gordon atlas, and entries equal the average e-field model values at each pair of regions for the given participant, site, and orientation. We assume that  $\mathbf{X}_{post}^l = C \cdot \mathbf{E}_l \circ \mathbf{X}_{pre}$ , where  $C$  is a positive proportionality constant, and  $\circ$  denotes the Hadamard product. Thus, for a given stimulation site and coil orientation combination  $l$ ,

$$\Delta \mathbf{Y}^{mood} = (C \cdot \mathbf{E}_l \circ \mathbf{X}_{pre} - \mathbf{X}_{pre})\boldsymbol{\beta} + \boldsymbol{\epsilon}' \text{ (Eq. A5).}$$

With these assumptions, and substituting the  $\widehat{\boldsymbol{\beta}}_k$  estimated from the PCR described above, it is possible to compare relative differences in the predicted change in behavioral symptom score across sites and orientations  $l$ .

## Supplemental References

1. Seok, D. *et al.* Dimensional Connectomics of Anxious Misery, a Human Connectome Study Related to Human Disease: Overview of Protocol and Data Quality. *NeuroImage Clin.* **28**, 102489 (2020).
2. Thielscher, A., Antunes, A. & Saturnino, G. B. Field modeling for transcranial magnetic stimulation: A useful tool to understand the physiological effects of TMS? *Proc. Annu. Int. Conf. IEEE Eng. Med. Biol. Soc. EMBS 222–225* (2015). doi:10.1109/EMBC.2015.7318340
3. Thielscher, A., Opitz, A. & Windhoff, M. Impact of the gyral geometry on the electric field induced by transcranial magnetic stimulation. *Neuroimage* **54**, 234–243 (2011).
4. Balderston, N. L. *et al.* A generalized workflow for conducting electric field-optimized, fMRI-guided, transcranial magnetic stimulation. *Nat. Protoc.* **15**, 3595–3614 (2020).
5. Glasser, M. F. *et al.* The minimal preprocessing pipelines for the Human Connectome Project. *Neuroimage* (2013). doi:10.1016/j.neuroimage.2013.04.127
6. Ciric, R. *et al.* Mitigating head motion artifact in functional connectivity MRI. *Nat. Protoc.* (2018). doi:10.1038/s41596-018-0065-y
7. Cox, R. W. AFNI: software for analysis and visualization of functional magnetic resonance neuroimages. *Comput. Biomed. Res.* **29**, 162–173 (1996).
8. Biswal, B. B. *et al.* Toward discovery science of human brain function. *Proc. Natl. Acad. Sci. U. S. A.* (2010). doi:10.1073/pnas.0911855107
9. Satterthwaite, T. D. *et al.* An improved framework for confound regression and filtering for control of motion artifact in the preprocessing of resting-state functional connectivity data. *Neuroimage* (2013). doi:10.1016/j.neuroimage.2012.08.052
10. Smith, S. M. & Brady, J. M. SUSAN - A new approach to low level image processing. *Int. J. Comput. Vis.* (1997). doi:10.1023/A:1007963824710
11. Gordon, E. M. *et al.* Generation and Evaluation of a Cortical Area Parcellation from Resting-State Correlations. *Cereb. Cortex* **26**, 288–303 (2016).
12. Fox, M. D., Liu, H. & Pascual-Leone, A. Identification of reproducible individualized targets for treatment of depression with TMS based on intrinsic connectivity. *Neuroimage* **66**, 151–160 (2013).
13. Trapp, N. T. *et al.* Reliability of targeting methods in TMS for depression: Beam F3 vs. 5.5 cm. *Brain Stimul.* **13**, 578–581 (2020).

**Supplemental Table 1: Sites used to define the P --> A dIPFC axis**

| Site | x     |       | y    | z    | Location Details      |
|------|-------|-------|------|------|-----------------------|
|      | Left  | Right |      |      |                       |
| 1    | -43.5 | 43.5  | 4.5  | 59.5 | Most posterior        |
| 2    | -42.7 | 42.7  | 8.3  | 57.7 |                       |
| 3    | -41.8 | 41.8  | 12.2 | 55.8 |                       |
| 4    | -41.0 | 41.0  | 16.0 | 54.0 | 5 cm therapeutic site |
| 5    | -40.2 | 40.2  | 19.8 | 52.2 |                       |
| 6    | -39.3 | 39.3  | 23.7 | 50.3 |                       |
| 7    | -38.5 | 38.5  | 27.5 | 48.5 |                       |
| 8    | -37.7 | 37.7  | 31.3 | 46.7 |                       |
| 9    | -36.8 | 36.8  | 35.2 | 44.8 |                       |
| 10   | -36.0 | 36.0  | 39.0 | 43.0 | BA9                   |
| 11   | -38.0 | 38.0  | 39.3 | 39.5 |                       |
| 12   | -40.0 | 40.0  | 39.5 | 36.0 | Beam-F3               |
| 13   | -42.0 | 42.0  | 39.8 | 32.5 |                       |
| 14   | -44.0 | 44.0  | 40.0 | 29.0 | BA46                  |
| 15   | -46.0 | 46.0  | 40.3 | 25.5 |                       |
| 16   | -48.0 | 48.0  | 40.5 | 22.0 |                       |
| 17   | -50.0 | 50.0  | 40.8 | 18.5 | Most Anterior         |

**Note: Coordinates in MNI space.**

**Supplemental Table 2:** Sites used to define the M--> L Hand Knob axis

| Site | x     |       | y     | z    | Location Details |
|------|-------|-------|-------|------|------------------|
|      | Left  | Right |       |      |                  |
| 1    | -20.0 | 20.0  | -30.0 | 58.0 | Upper gyrus      |
| 2    | -25.0 | 25.0  | -28.0 | 58.0 |                  |
| 3    | -30.0 | 30.0  | -26.0 | 58.0 |                  |
| 4    | -36.0 | 36.0  | -24.0 | 58.0 | Hand Knob        |
| 5    | -40.0 | 40.0  | -20.0 | 58.0 |                  |
| 6    | -44.0 | 44.0  | -16.0 | 58.0 |                  |
| 7    | -48.0 | 48.0  | -12.0 | 58.0 | Lower Gyrus      |

**Note: Coordinates in MNI space.**



**Supplemental Table 3: Demographic information**

|                                | AM            | Control       |
|--------------------------------|---------------|---------------|
| <i>Demographic Information</i> |               |               |
| Age                            | 28.29 (8.2)   | 28.92 (6.91)  |
| Total N                        | 94            | 25            |
| Females                        | 64            | 16            |
| <i>Clinical measures</i>       |               |               |
| HAMD                           | 13.3 (5.67)   | 1.28 (1.93)   |
| MADRS                          | 21.08 (8.87)  | 0.68 (1.18)   |
| SHAPS                          | 41.24 (7.61)  | 51.28 (5.37)  |
| MASQ                           | 60.35 (9.07)  | 48.76 (12.21) |
| CTQ                            | 62.53 (8.79)  | 61.04 (5.77)  |
| ISI                            | 11.86 (6.12)  | 3.28 (3.27)   |
| RTS                            | 95.09 (21.51) | 48.2 (21.07)  |
| ASI                            | 28.13 (14.71) | 6.72 (5.91)   |

**Note: Values represent Mean (SD).**

**Supplemental Table 4. Pearson correlations between image quality and model predictions.**

| Site    | AM     |        |              | HC     |        |
|---------|--------|--------|--------------|--------|--------|
|         | Motion | tSNR   |              | Motion | tSNR   |
|         |        |        | <i>MADRS</i> |        |        |
| 5cm     | -0.096 | -0.06  |              | -0.376 | -0.065 |
| e-field | -0.085 | -0.069 |              | -0.362 | -0.065 |
| sgACC   | -0.095 | -0.069 |              | -0.365 | -0.072 |
| BA9     | -0.096 | -0.065 |              | -0.36  | -0.079 |
| Beam/F3 | -0.094 | -0.066 |              | -0.361 | -0.076 |
| BA46    | -0.093 | -0.067 |              | -0.365 | -0.067 |
|         |        |        | <i>HAMD</i>  |        |        |
| 5cm     | -0.097 | -0.073 |              | -0.387 | -0.061 |
| e-field | -0.096 | -0.072 |              | -0.366 | -0.072 |
| sgACC   | -0.094 | -0.069 |              | -0.381 | -0.067 |
| BA9     | -0.093 | -0.073 |              | -0.385 | -0.059 |
| Beam/F3 | -0.093 | -0.073 |              | -0.377 | -0.068 |
| BA46    | -0.092 | -0.075 |              | -0.372 | -0.071 |

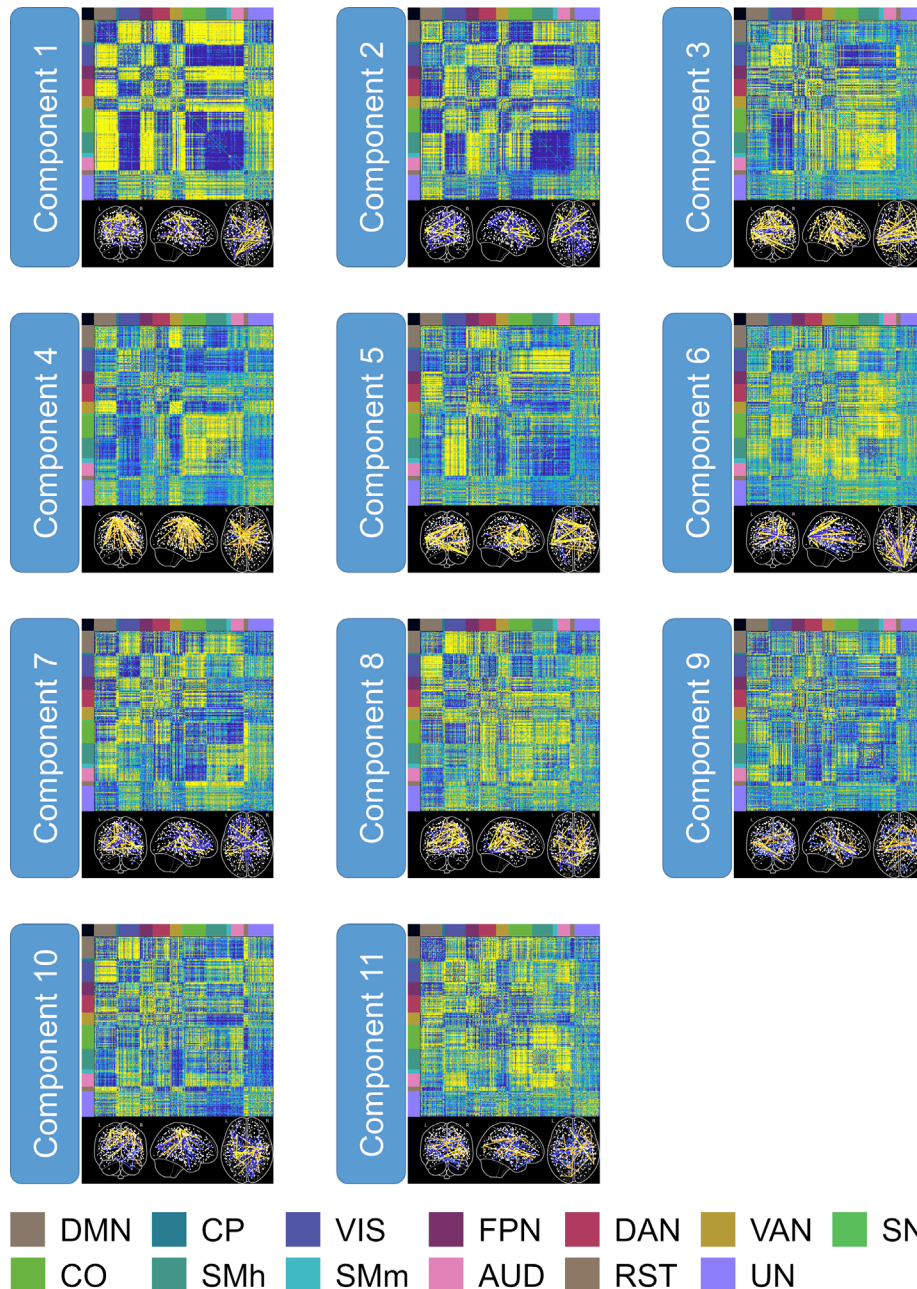

**Supplemental Figure 1. Item coefficients for the components selected from the Anxious Misery Principle Components Analysis.** Matrices represent the loading of each pairwise connection onto the principle components, sorted by network according to the key at the bottom of the figure. Connectome graphs for each of the principle components show the top 0.1% of connections according to the item weightings. **Network Color key:** **DMN** = Default Mode Network; **CP** = CinguloParietal; **VIS** = Visual; **FPN** = FrontoParietal Network; **DAN** = Dorsal Attention Network; **VAN** = Ventral Attention Network; **SN** = Salience Network; **CO** = CinguloOpercular; **SMh** = SomatoMotor (hand); **SMm** = SomatoMotor (mouth); **AUD** = Auditory; **RST** = RetrosplenialTemporal; **UN** = Unassigned nodes. See full-size images below.

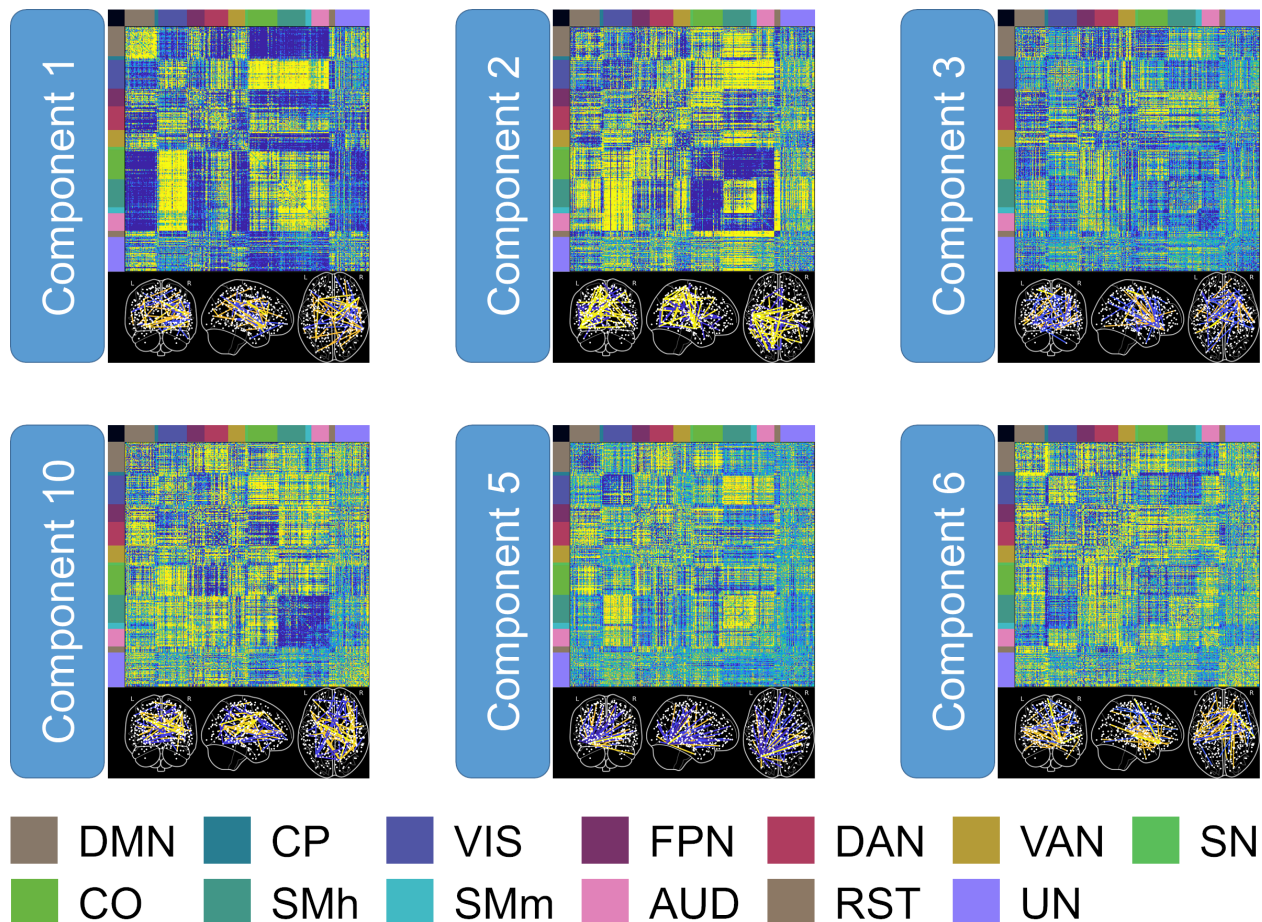

**Supplemental Figure 2. Item coefficients for the components selected from the Healthy Control Principle Components Analysis.** Matrices represent the loading of each pairwise connection onto the principle components, sorted by network according to the key at the bottom of the figure. Connectome graphs for each of the principle components show the top 0.1% of connections according to the item weightings.

**Network Color key:** **DMN** = Default Mode Network; **CP** = CinguloParietal; **VIS** = Visual; **FPN** = FrontoParietal Network; **DAN** = Dorsal Attention Network; **VAN** = Ventral Attention Network; **SN** = Salience Network; **CO** = CinguloOpercular; **SMh** = SomatoMotor (hand); **SMm** = SomatoMotor (mouth); **AUD** = Auditory; **RST** = RetrosplenialTemporal; **UN** = Unassigned nodes. See full-size images below.

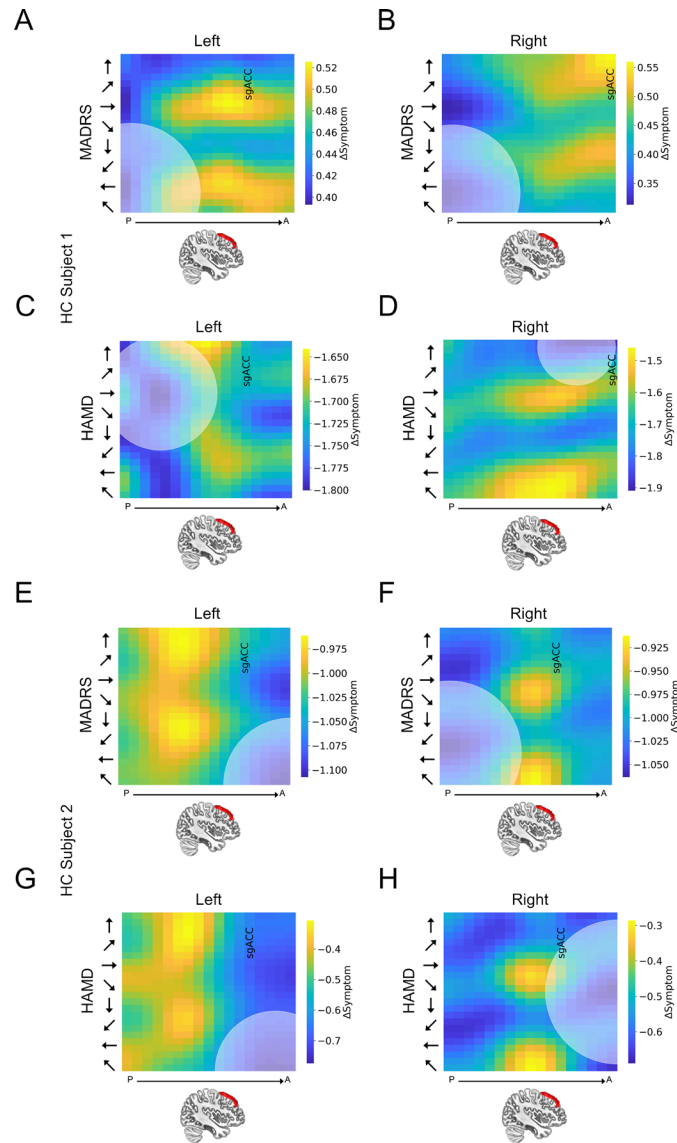

**Supplemental Figure 3. Individual subject heatmaps plotting dIPFC predictions for the healthy control group. (A, C, E, G)** Heatmaps representing the predicted MADRS and HAMID scores following a hypothetical course of TMS treatment to the left dIPFC. **(B, D, F, H)** Heatmaps representing the predicted MADRS/HAMID scores following a hypothetical course of TMS treatment to the right dIPFC. Colors represent the predicted change in MADRS/HAMID scores. Y axis represents coil orientation. X axis represents location along the Z-axis of the middle frontal gyrus. The center point of the shaded circle on the heatmaps represents the site and orientation of stimulation predicted to have the maximal reduction in symptoms for each subject. The area of the shaded circle represents the variability (i.e. Euclidean distance [95% confidence interval]) in this optimal site assessed using bootstrapping. **sgACC** = site along vector with maximal anti-correlation with the subgenual anterior cingulate cortex.



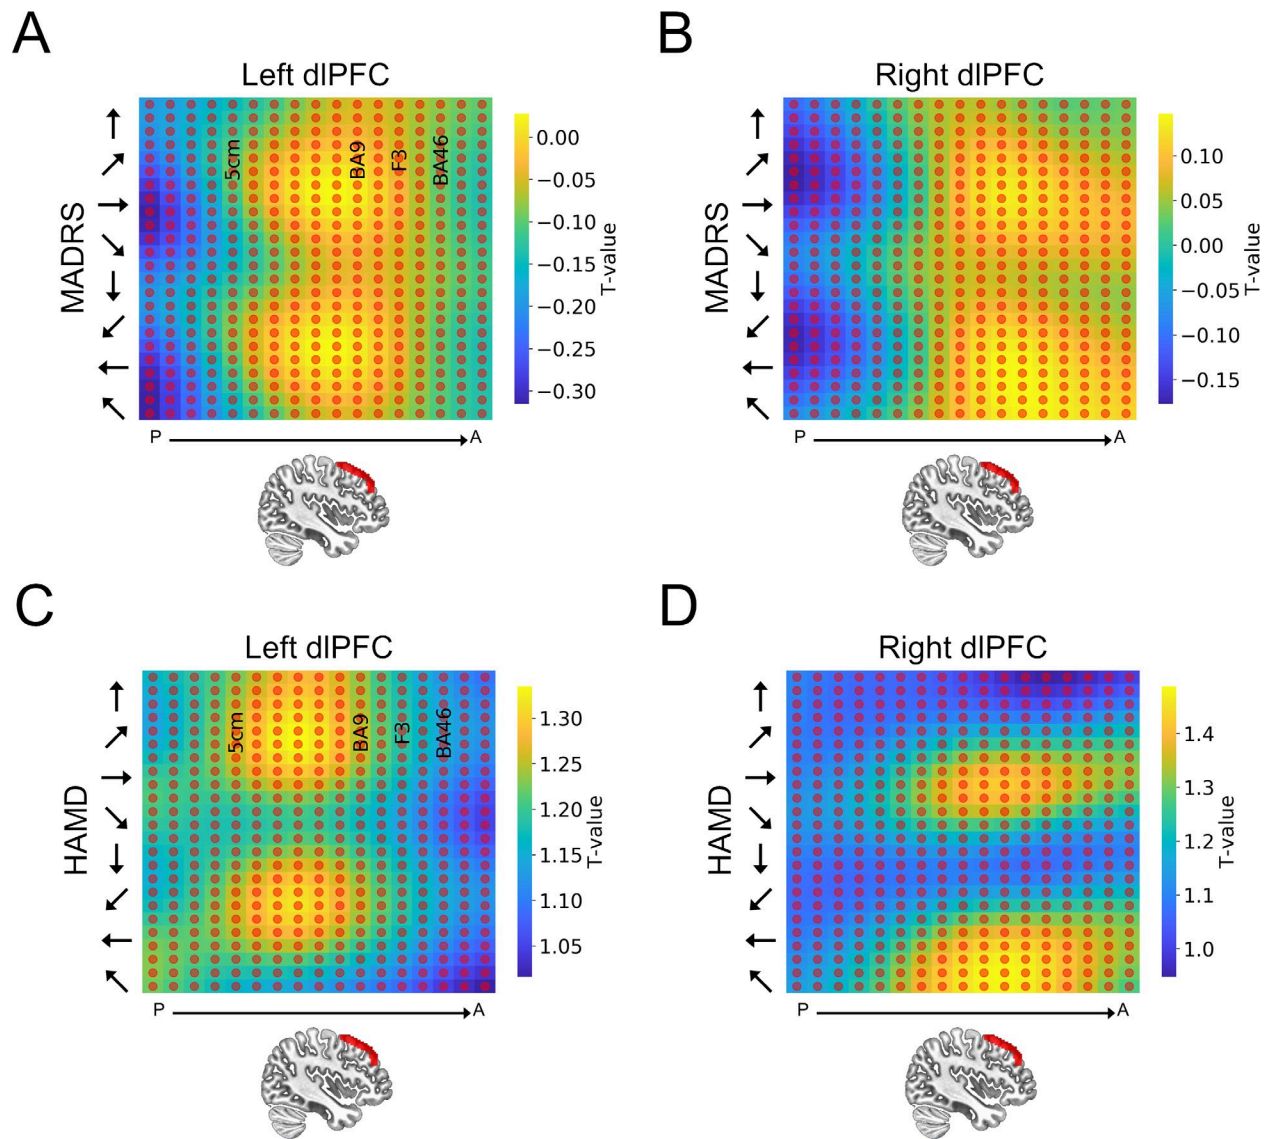

**Supplemental Figure 4. Group-level heatmaps plotting dIPFC predictions for the healthy control group.** **A)** Heatmap representing the predicted MADRS scores following a hypothetical course of TMS treatment to the left dIPFC. **B)** Heatmap representing the predicted MADRS scores following a hypothetical course of TMS treatment to the right dIPFC. **C)** Heatmap representing the predicted HAMD scores following a hypothetical course of TMS treatment to the left dIPFC. **D)** Heatmap representing the predicted HAMD scores following a hypothetical course of TMS treatment to the right dIPFC. Y axis represents coil orientation. X axis represents location along the Z-axis of the middle frontal gyrus. Red circles represent sites where the change in MADRS/HAMD scores was not statistically different from 0. **5cm** = Site in vector corresponding to the 5 cm rule target commonly used in therapeutic applications for depression <sup>12</sup>. **BA9** = Site in vector corresponding to Brodmann area 9 <sup>12</sup>. **F3** = Site in vector closest to the BEAM/F3 target commonly used in therapeutic applications for depression <sup>13</sup>. **BA46** = Site in vector corresponding to Brodmann area 46 <sup>12</sup>.

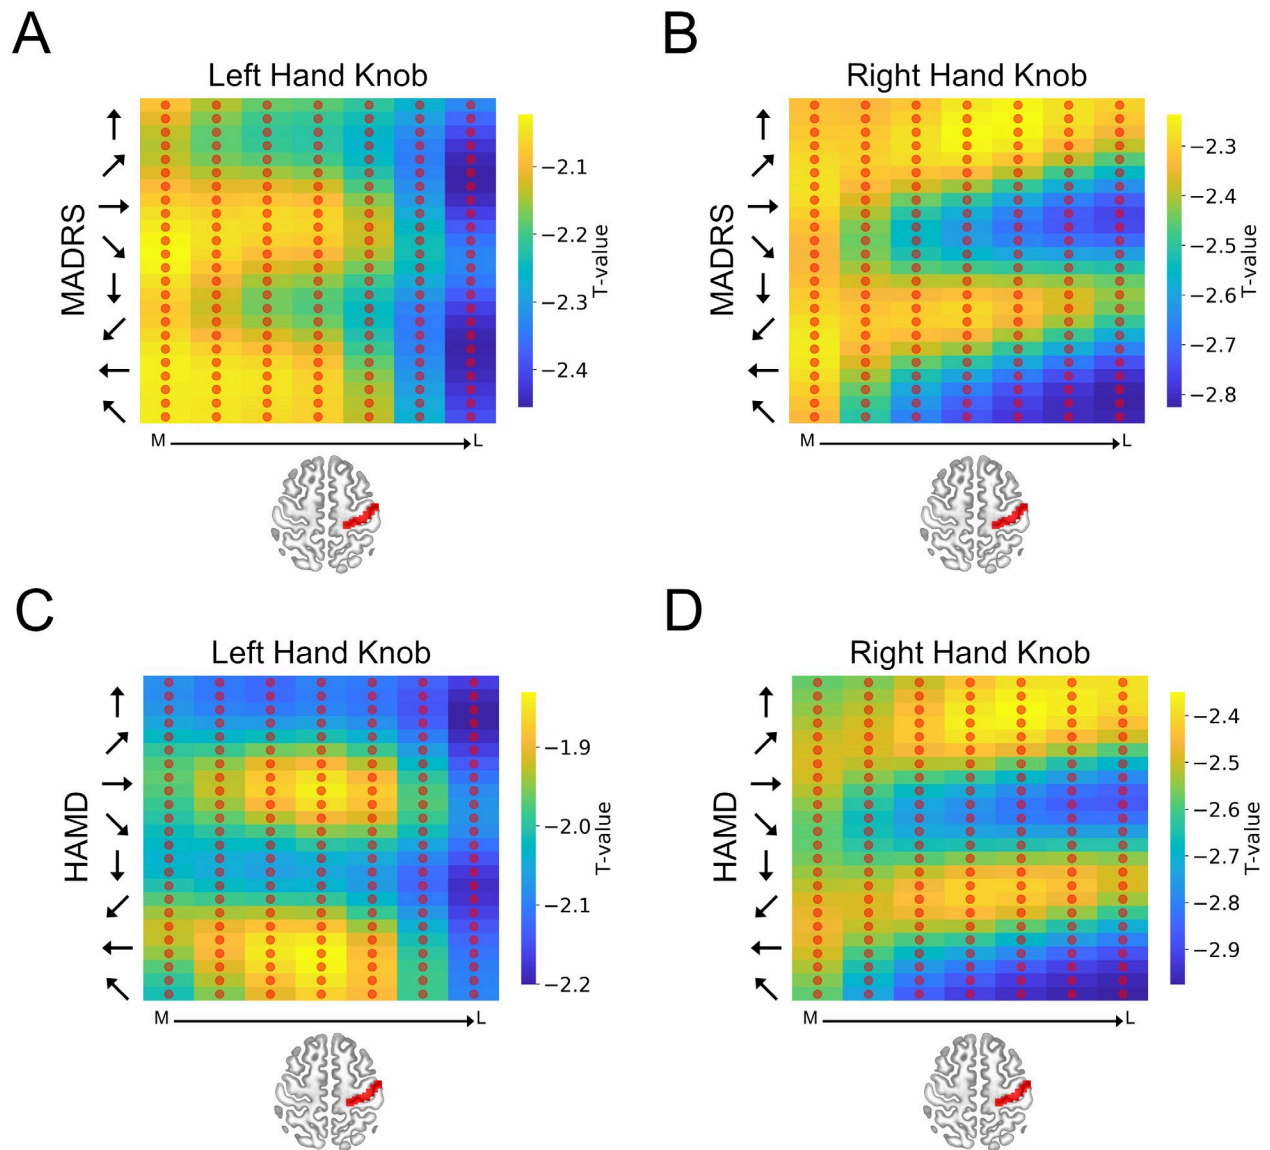

**Supplemental Figure 5. Group-level heatmaps plotting hand knob predictions for the anxious misery group.** **A)** Heatmap representing the predicted MADRS scores following a hypothetical course of TMS treatment to the left hand knob. **B)** Heatmap representing the predicted MADRS scores following a hypothetical course of TMS treatment to the right hand knob. **C)** Heatmap representing the predicted HAMD scores following a hypothetical course of TMS treatment to the left hand knob. **D)** Heatmap representing the predicted HAMD scores following a hypothetical course of TMS treatment to the right hand knob. Y axis represents coil orientation. X axis represents location along the medial to lateral axis of the primary motor cortex. Red circles represent sites where the change in MADRS/HAMD scores was not statistically different from 0.

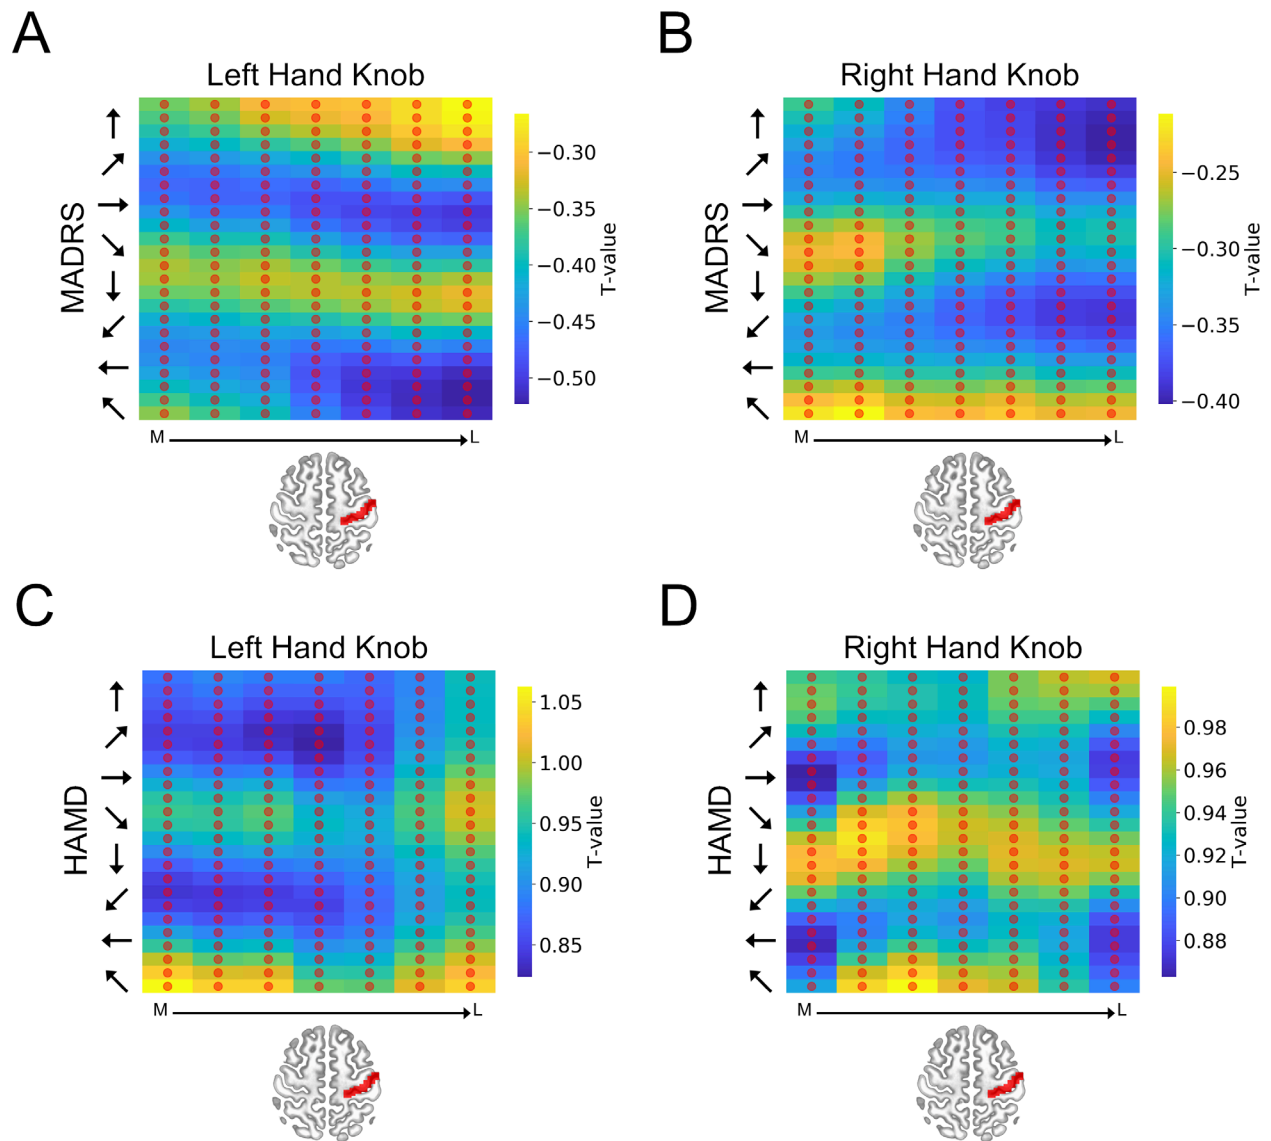

**Supplemental Figure 6. Group-level heatmaps plotting hand knob predictions for the healthy control group.** **A)** Heatmap representing the predicted MADRS scores following a hypothetical course of TMS treatment to the left hand knob. **B)** Heatmap representing the predicted MADRS scores following a hypothetical course of TMS treatment to the right hand knob. **C)** Heatmap representing the predicted HAMD scores following a hypothetical course of TMS treatment to the left hand knob. **D)** Heatmap representing the predicted HAMD scores following a hypothetical course of TMS treatment to the right hand knob. Y axis represents coil orientation. X axis represents location along the medial to lateral axis of the primary motor cortex. Red circles represent sites where the change in MADRS/HAMD scores was not statistically different from 0.



Anxious

misery

group

component

maps



component\_0

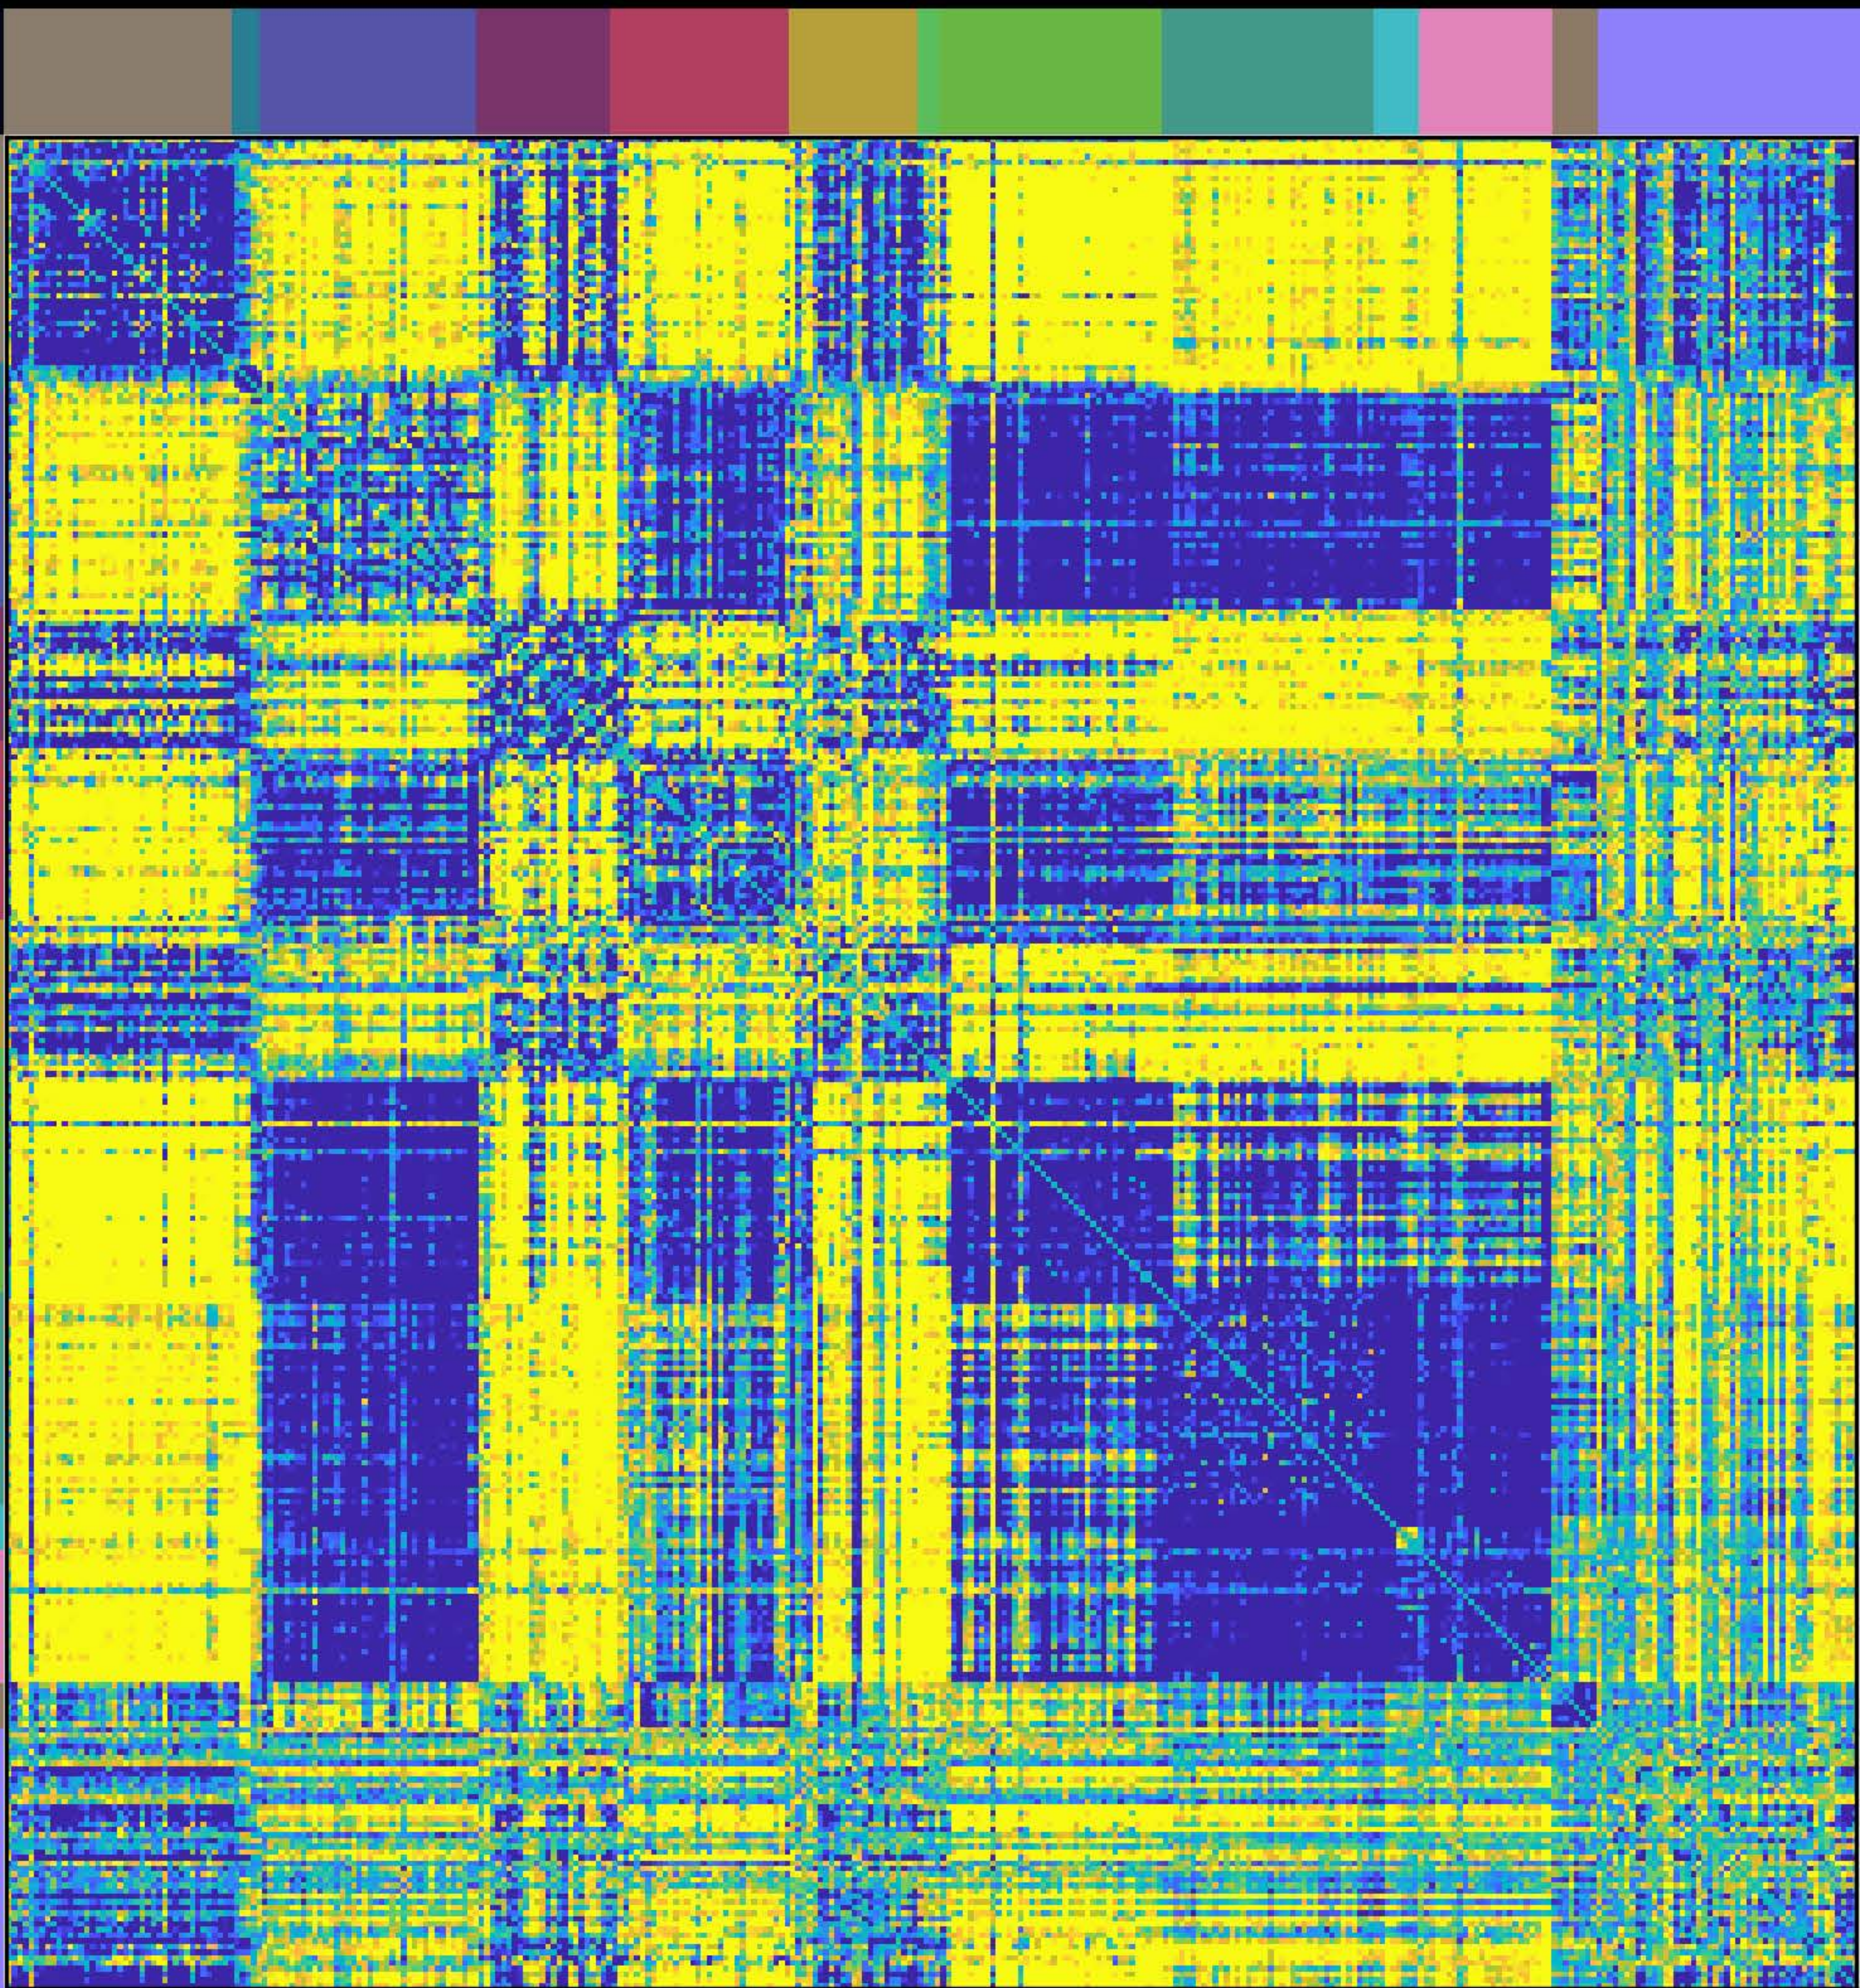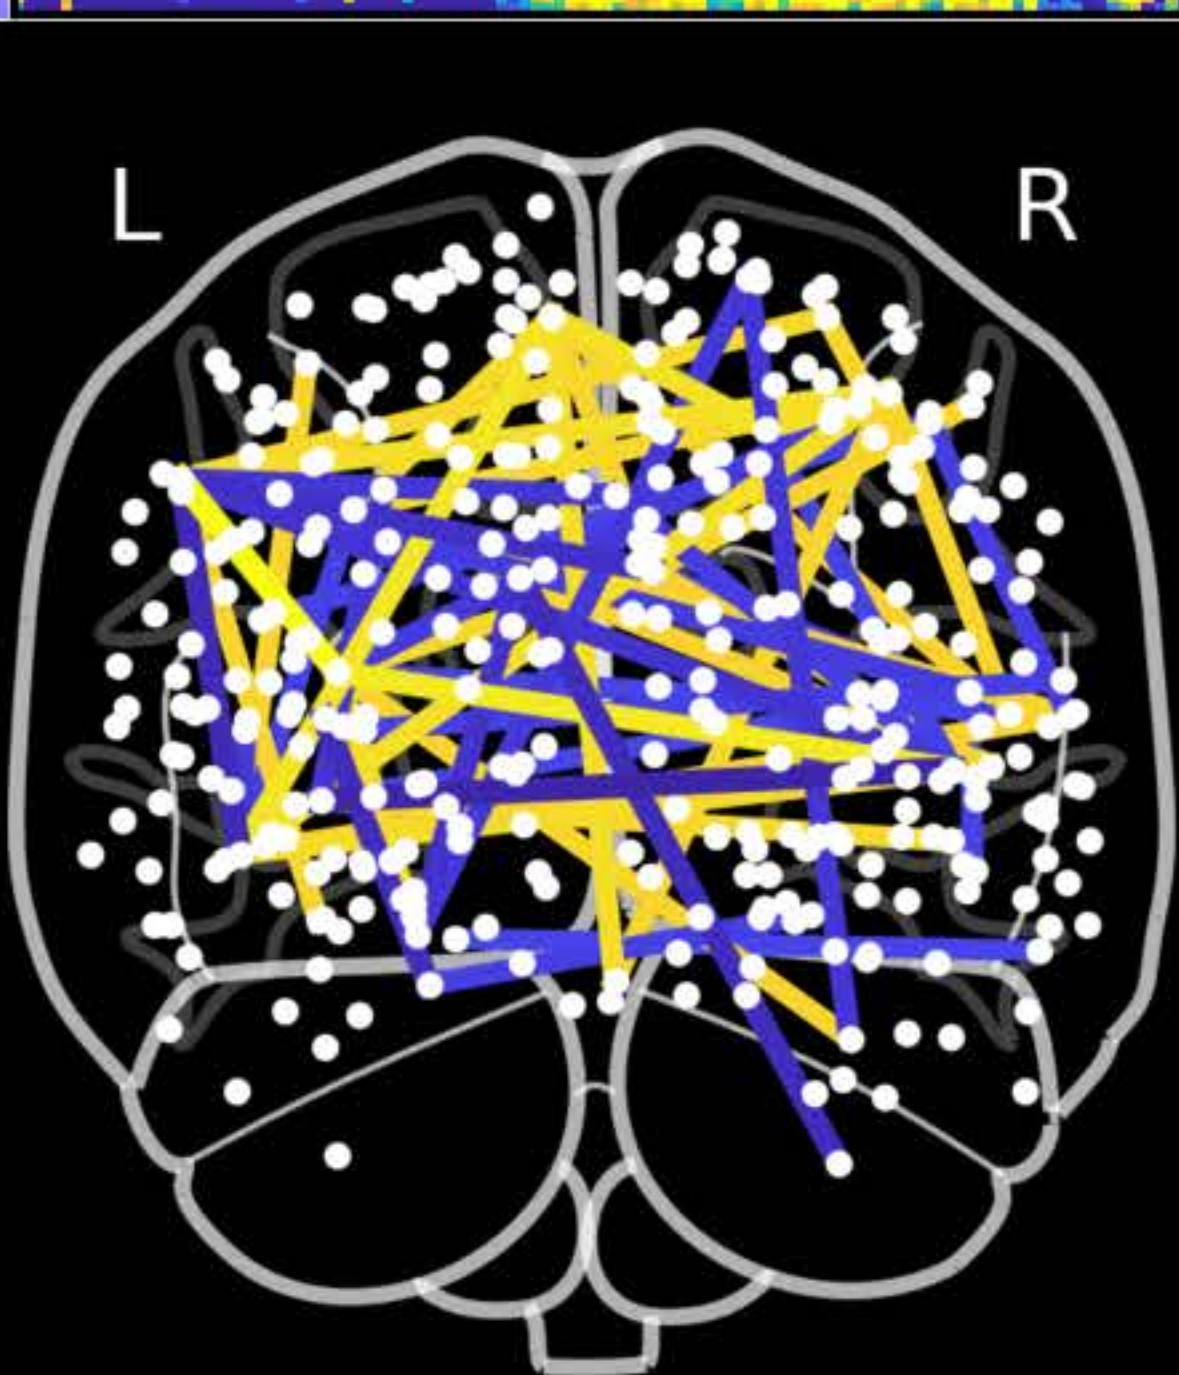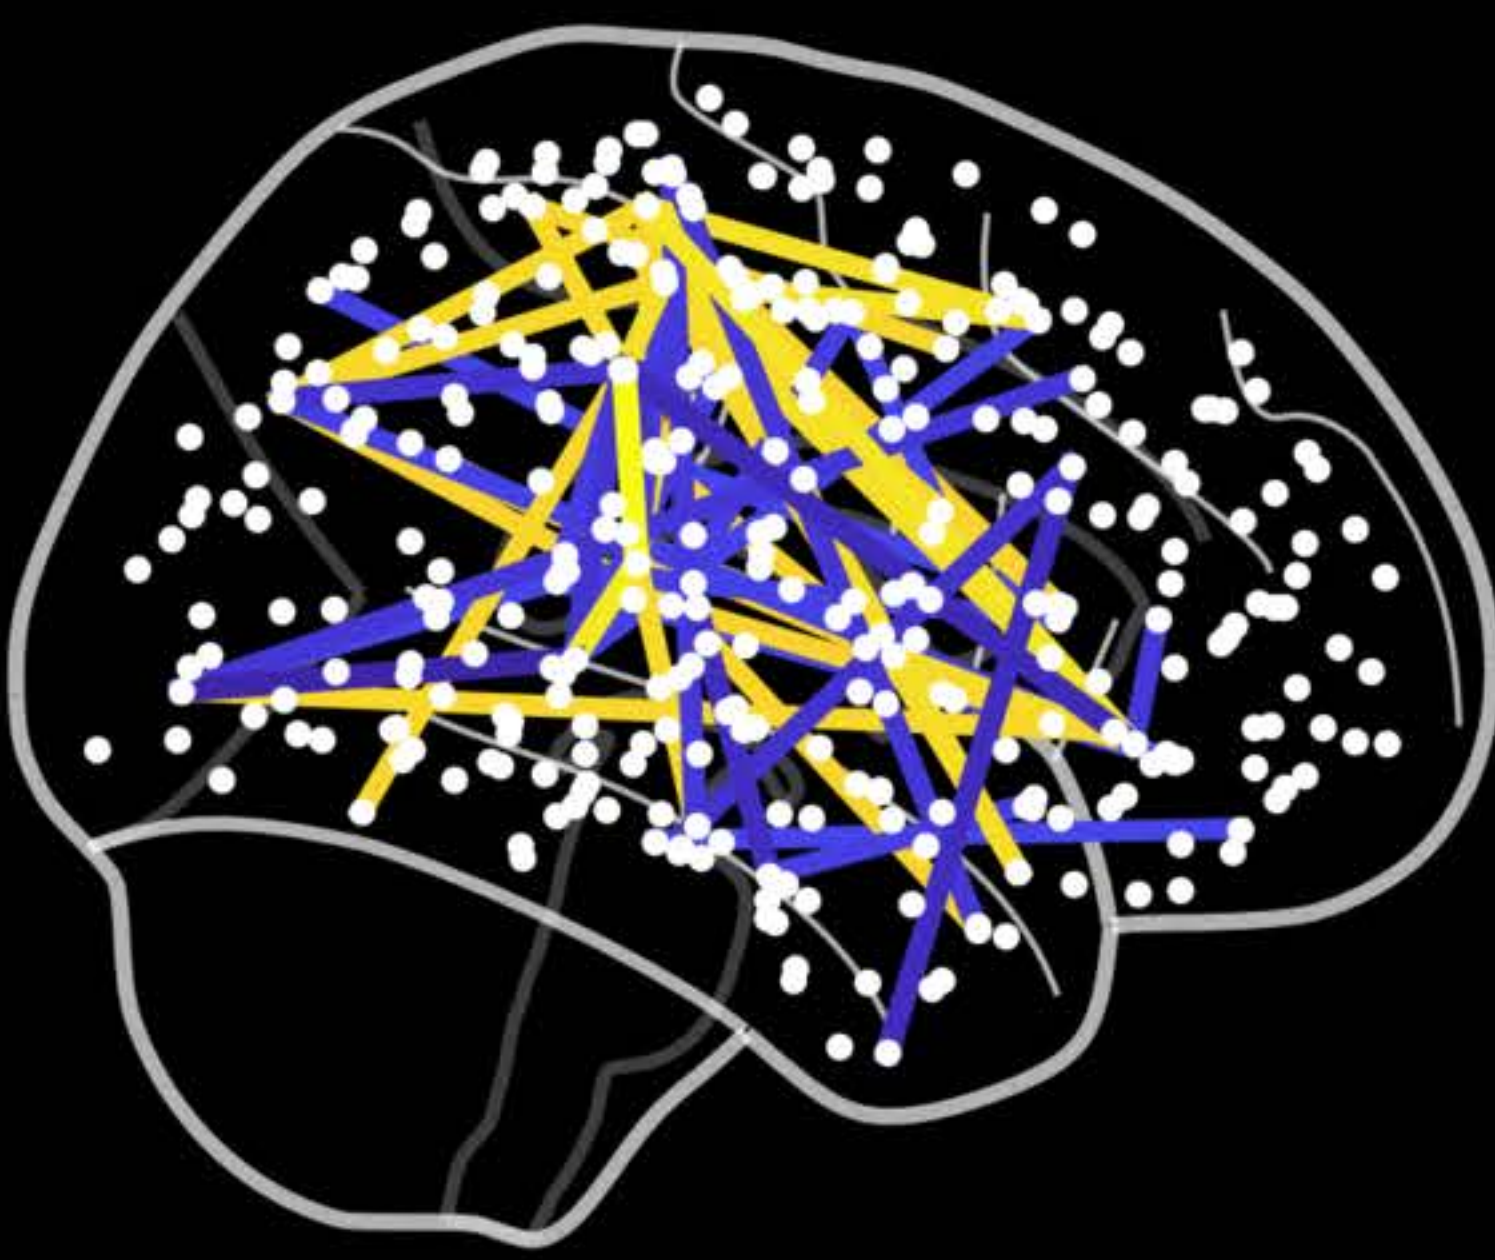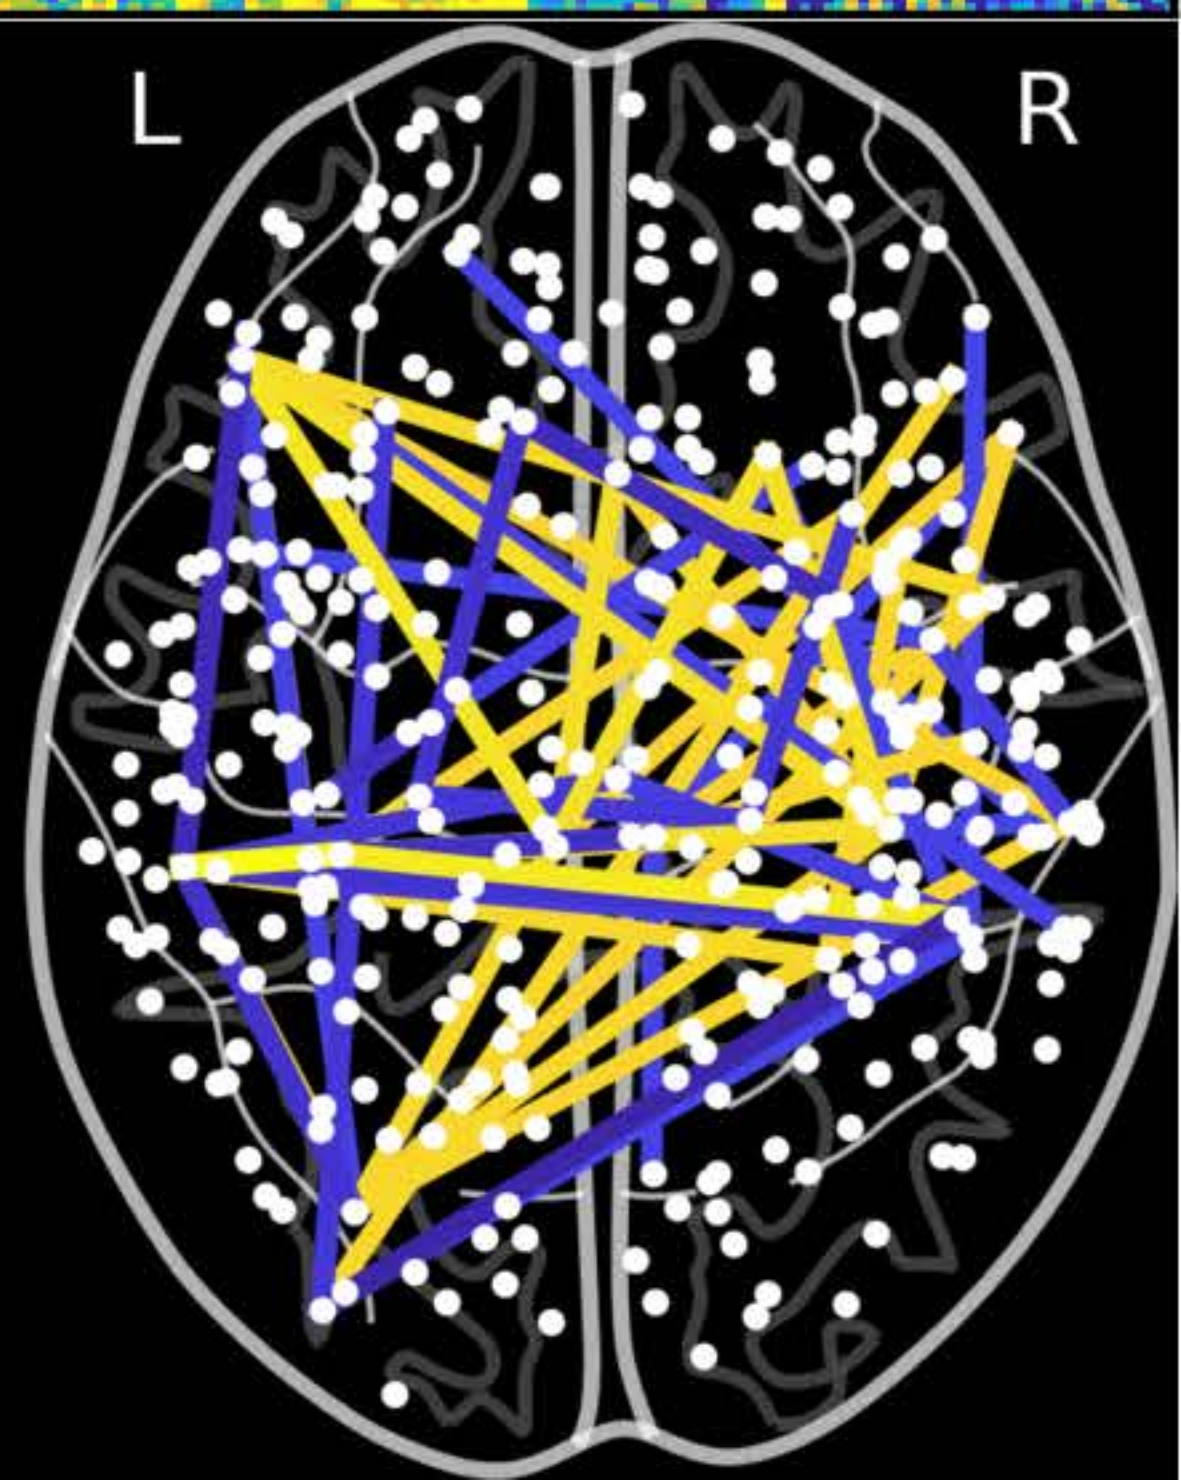



component\_1

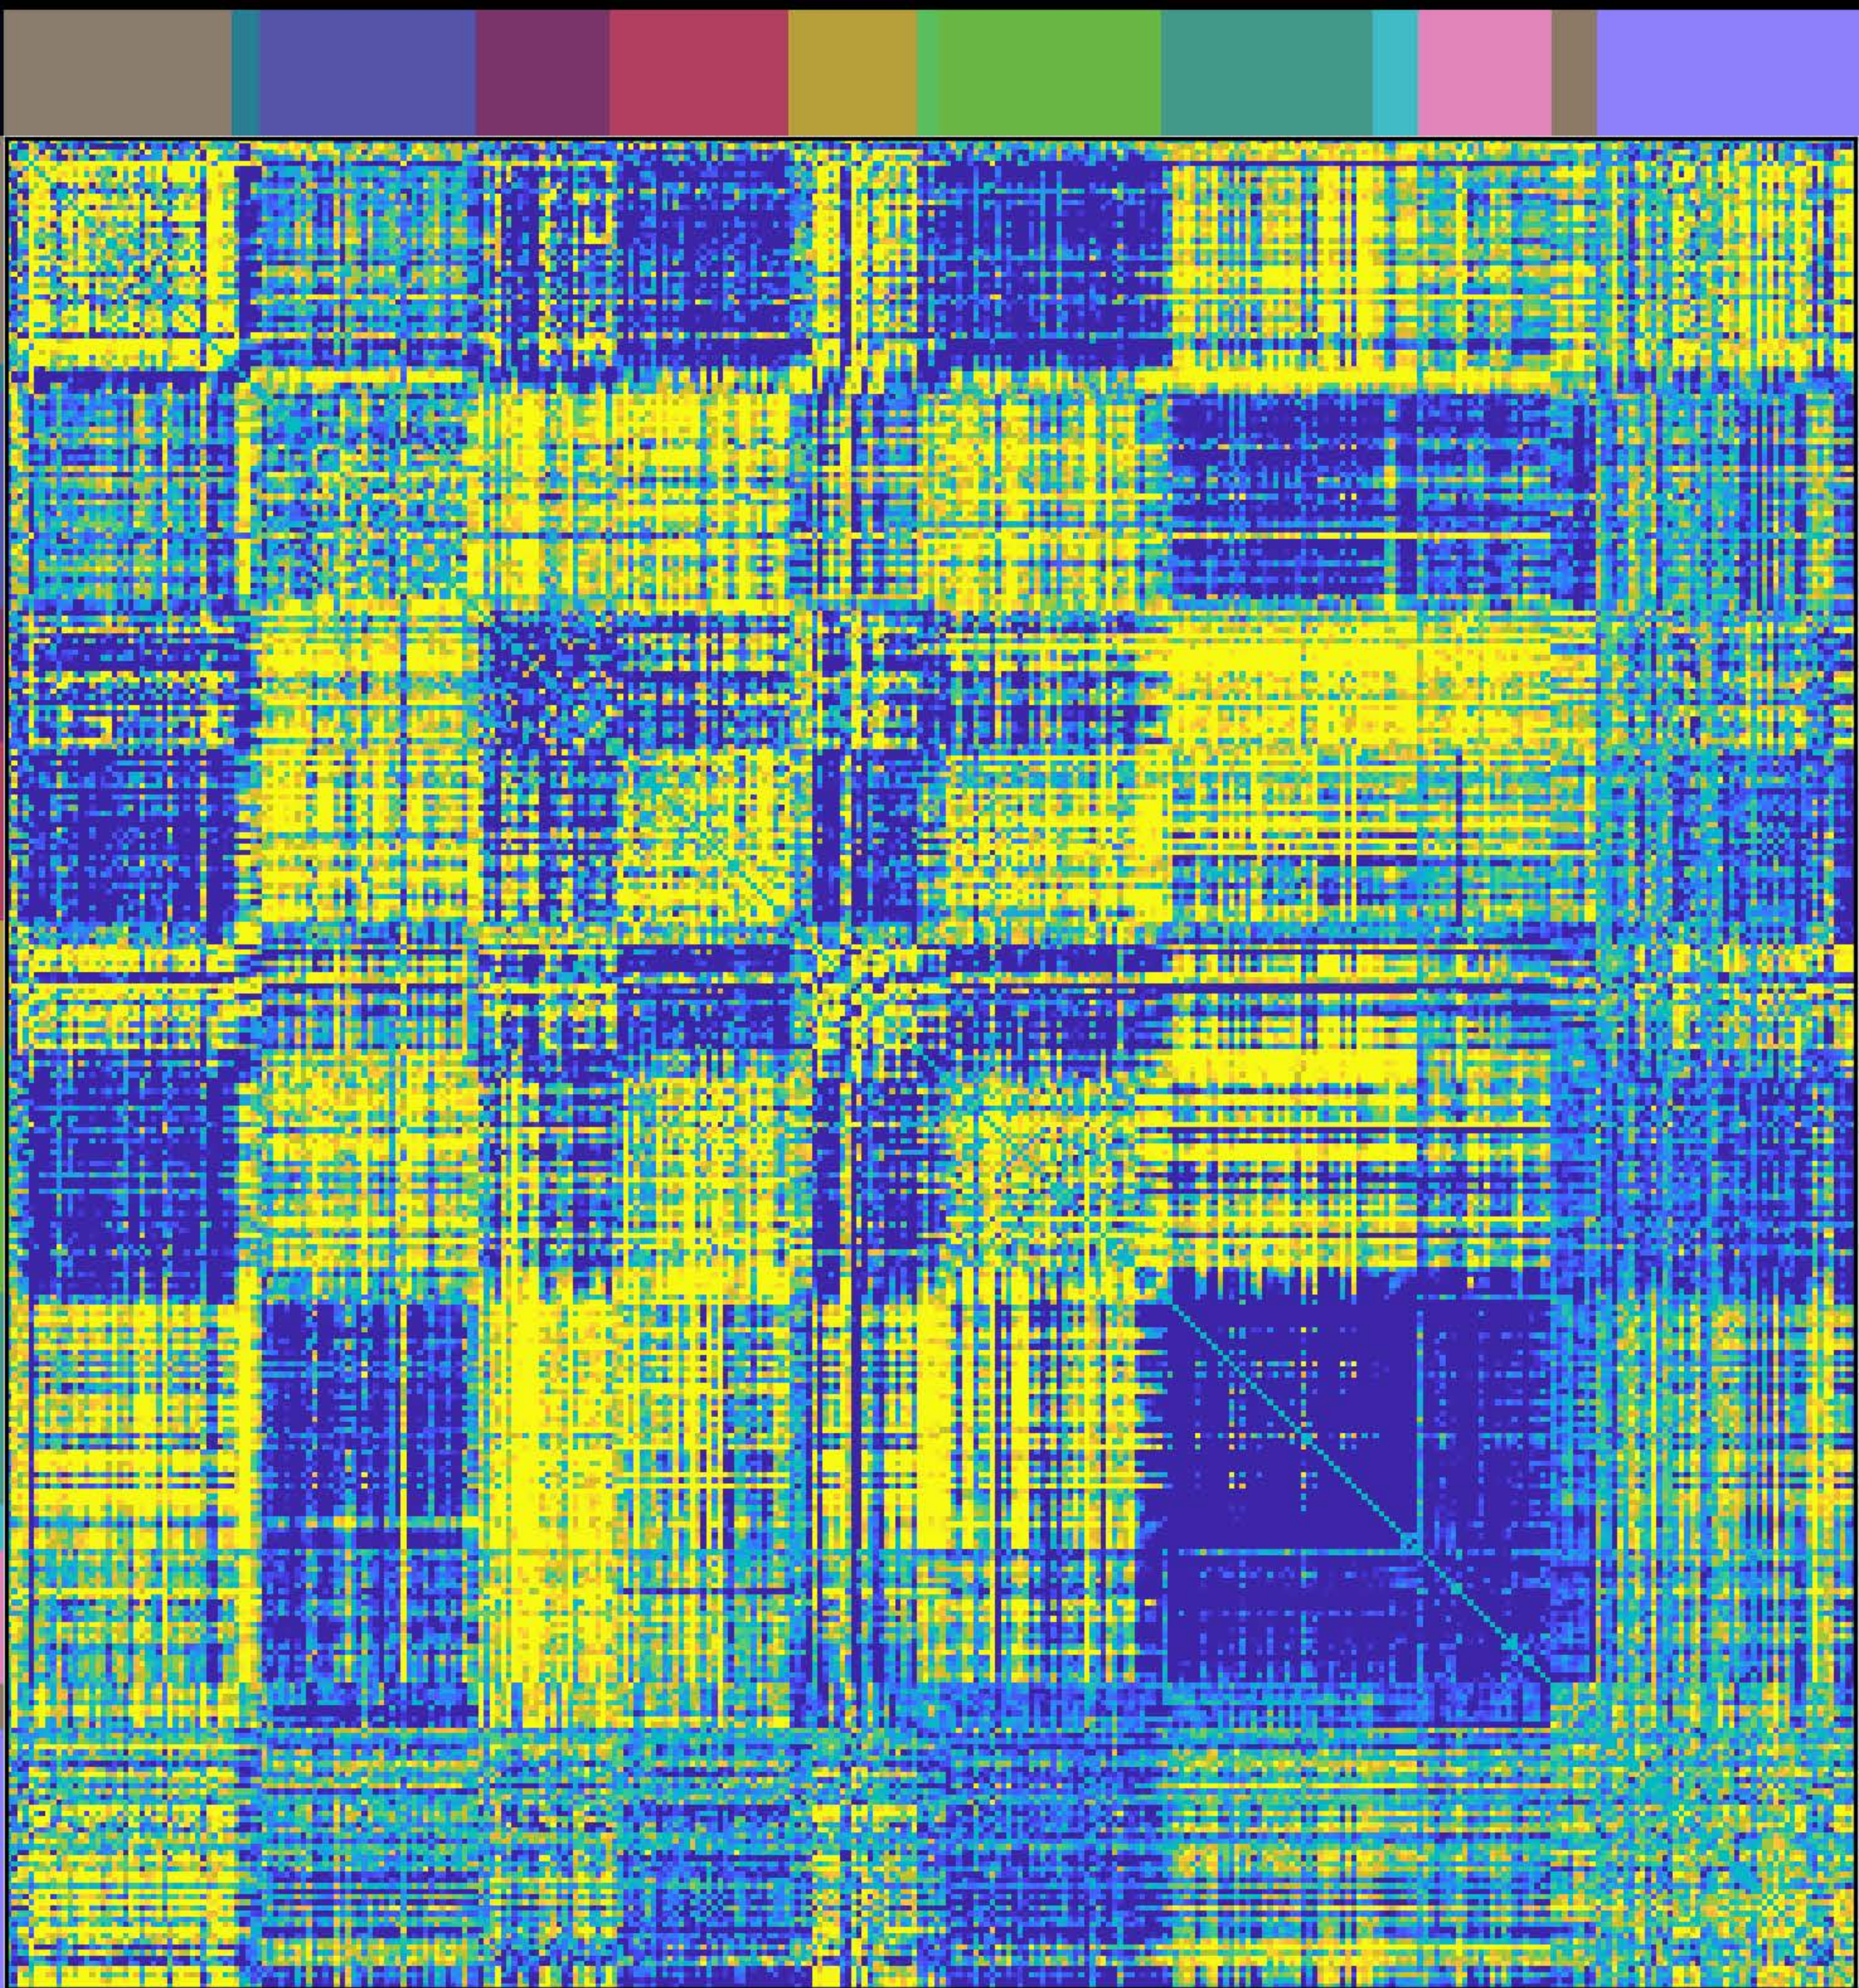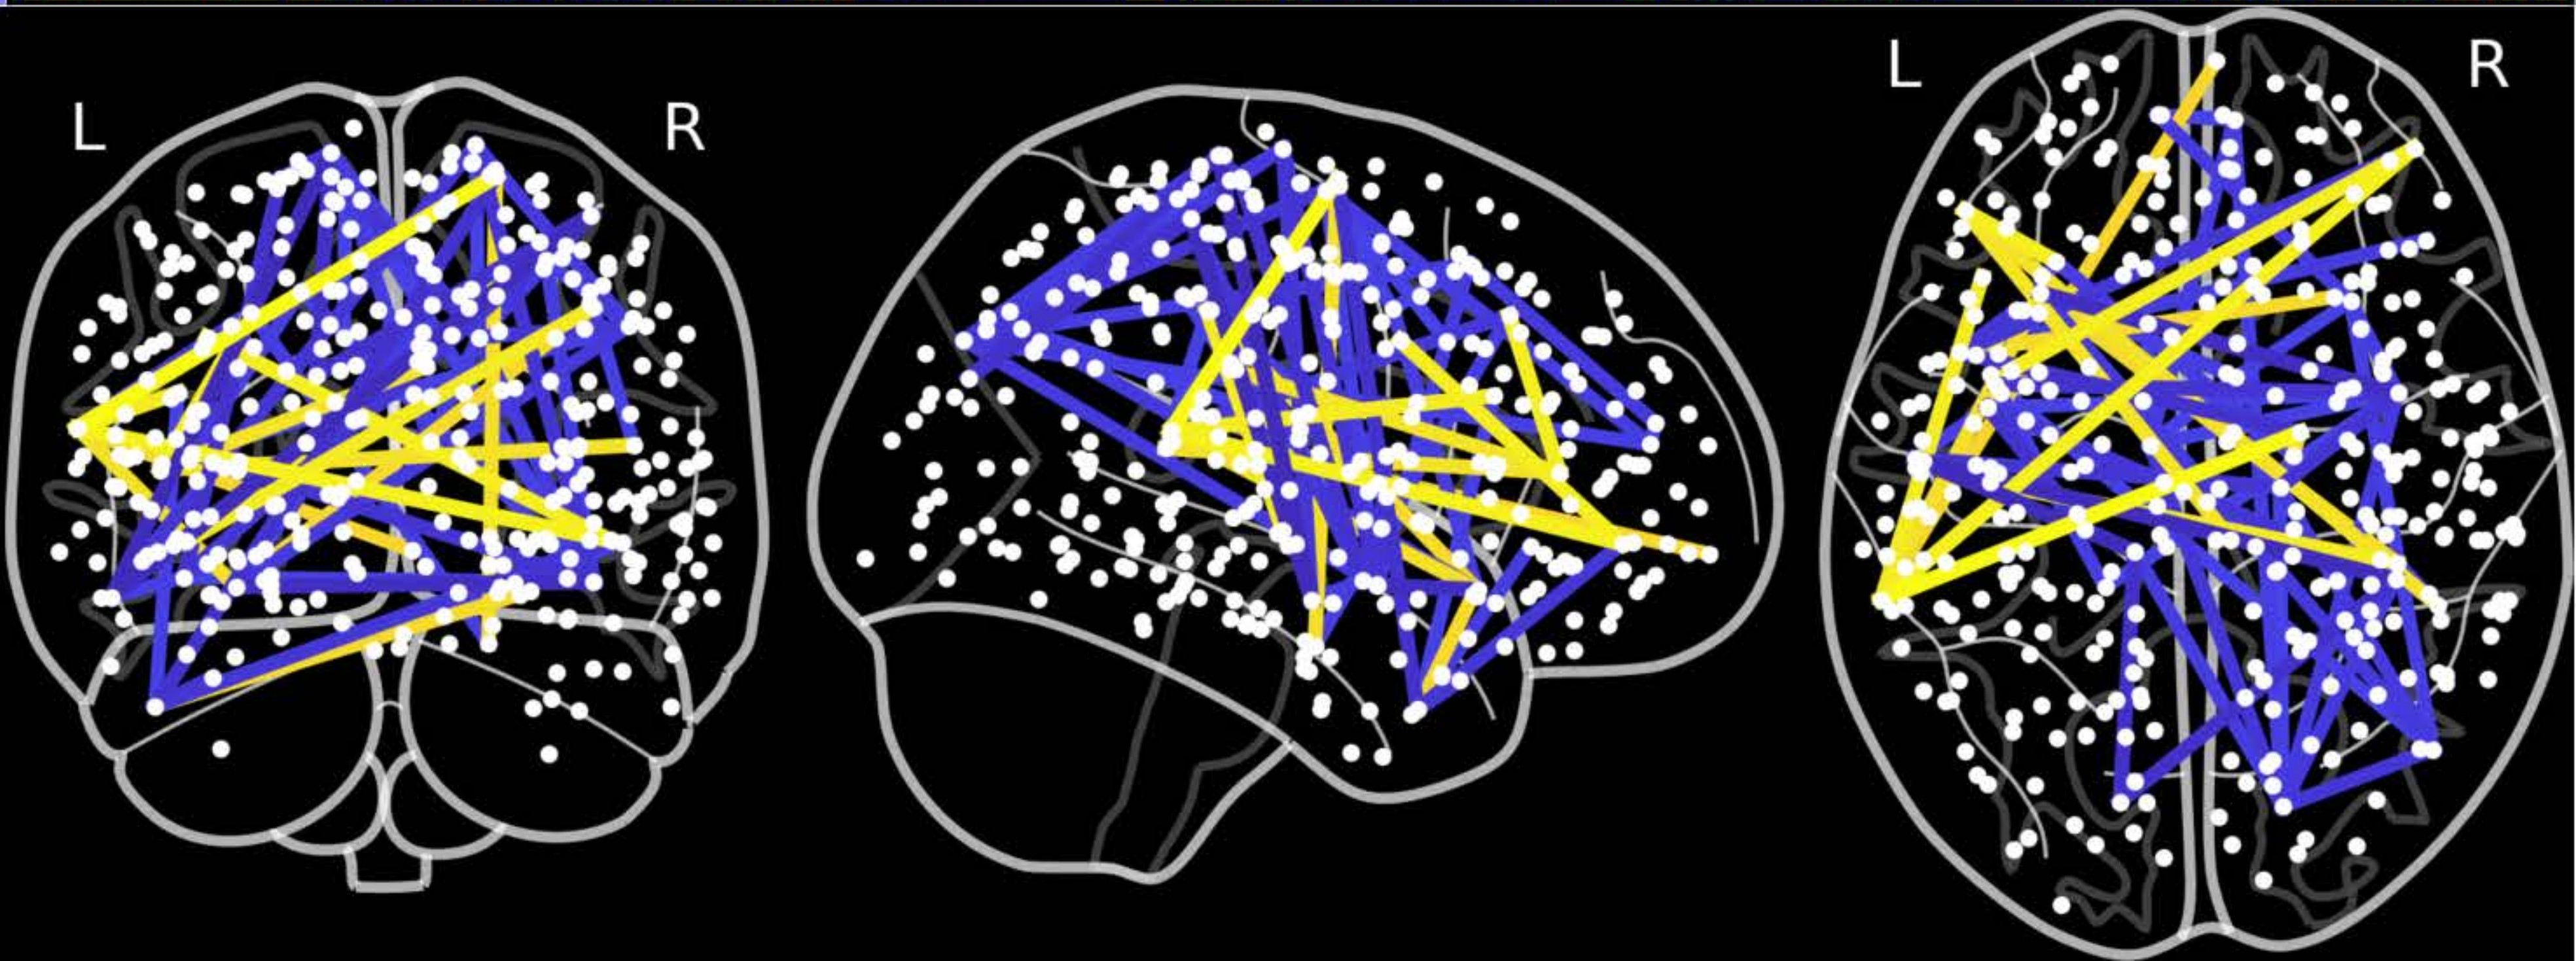



component\_2

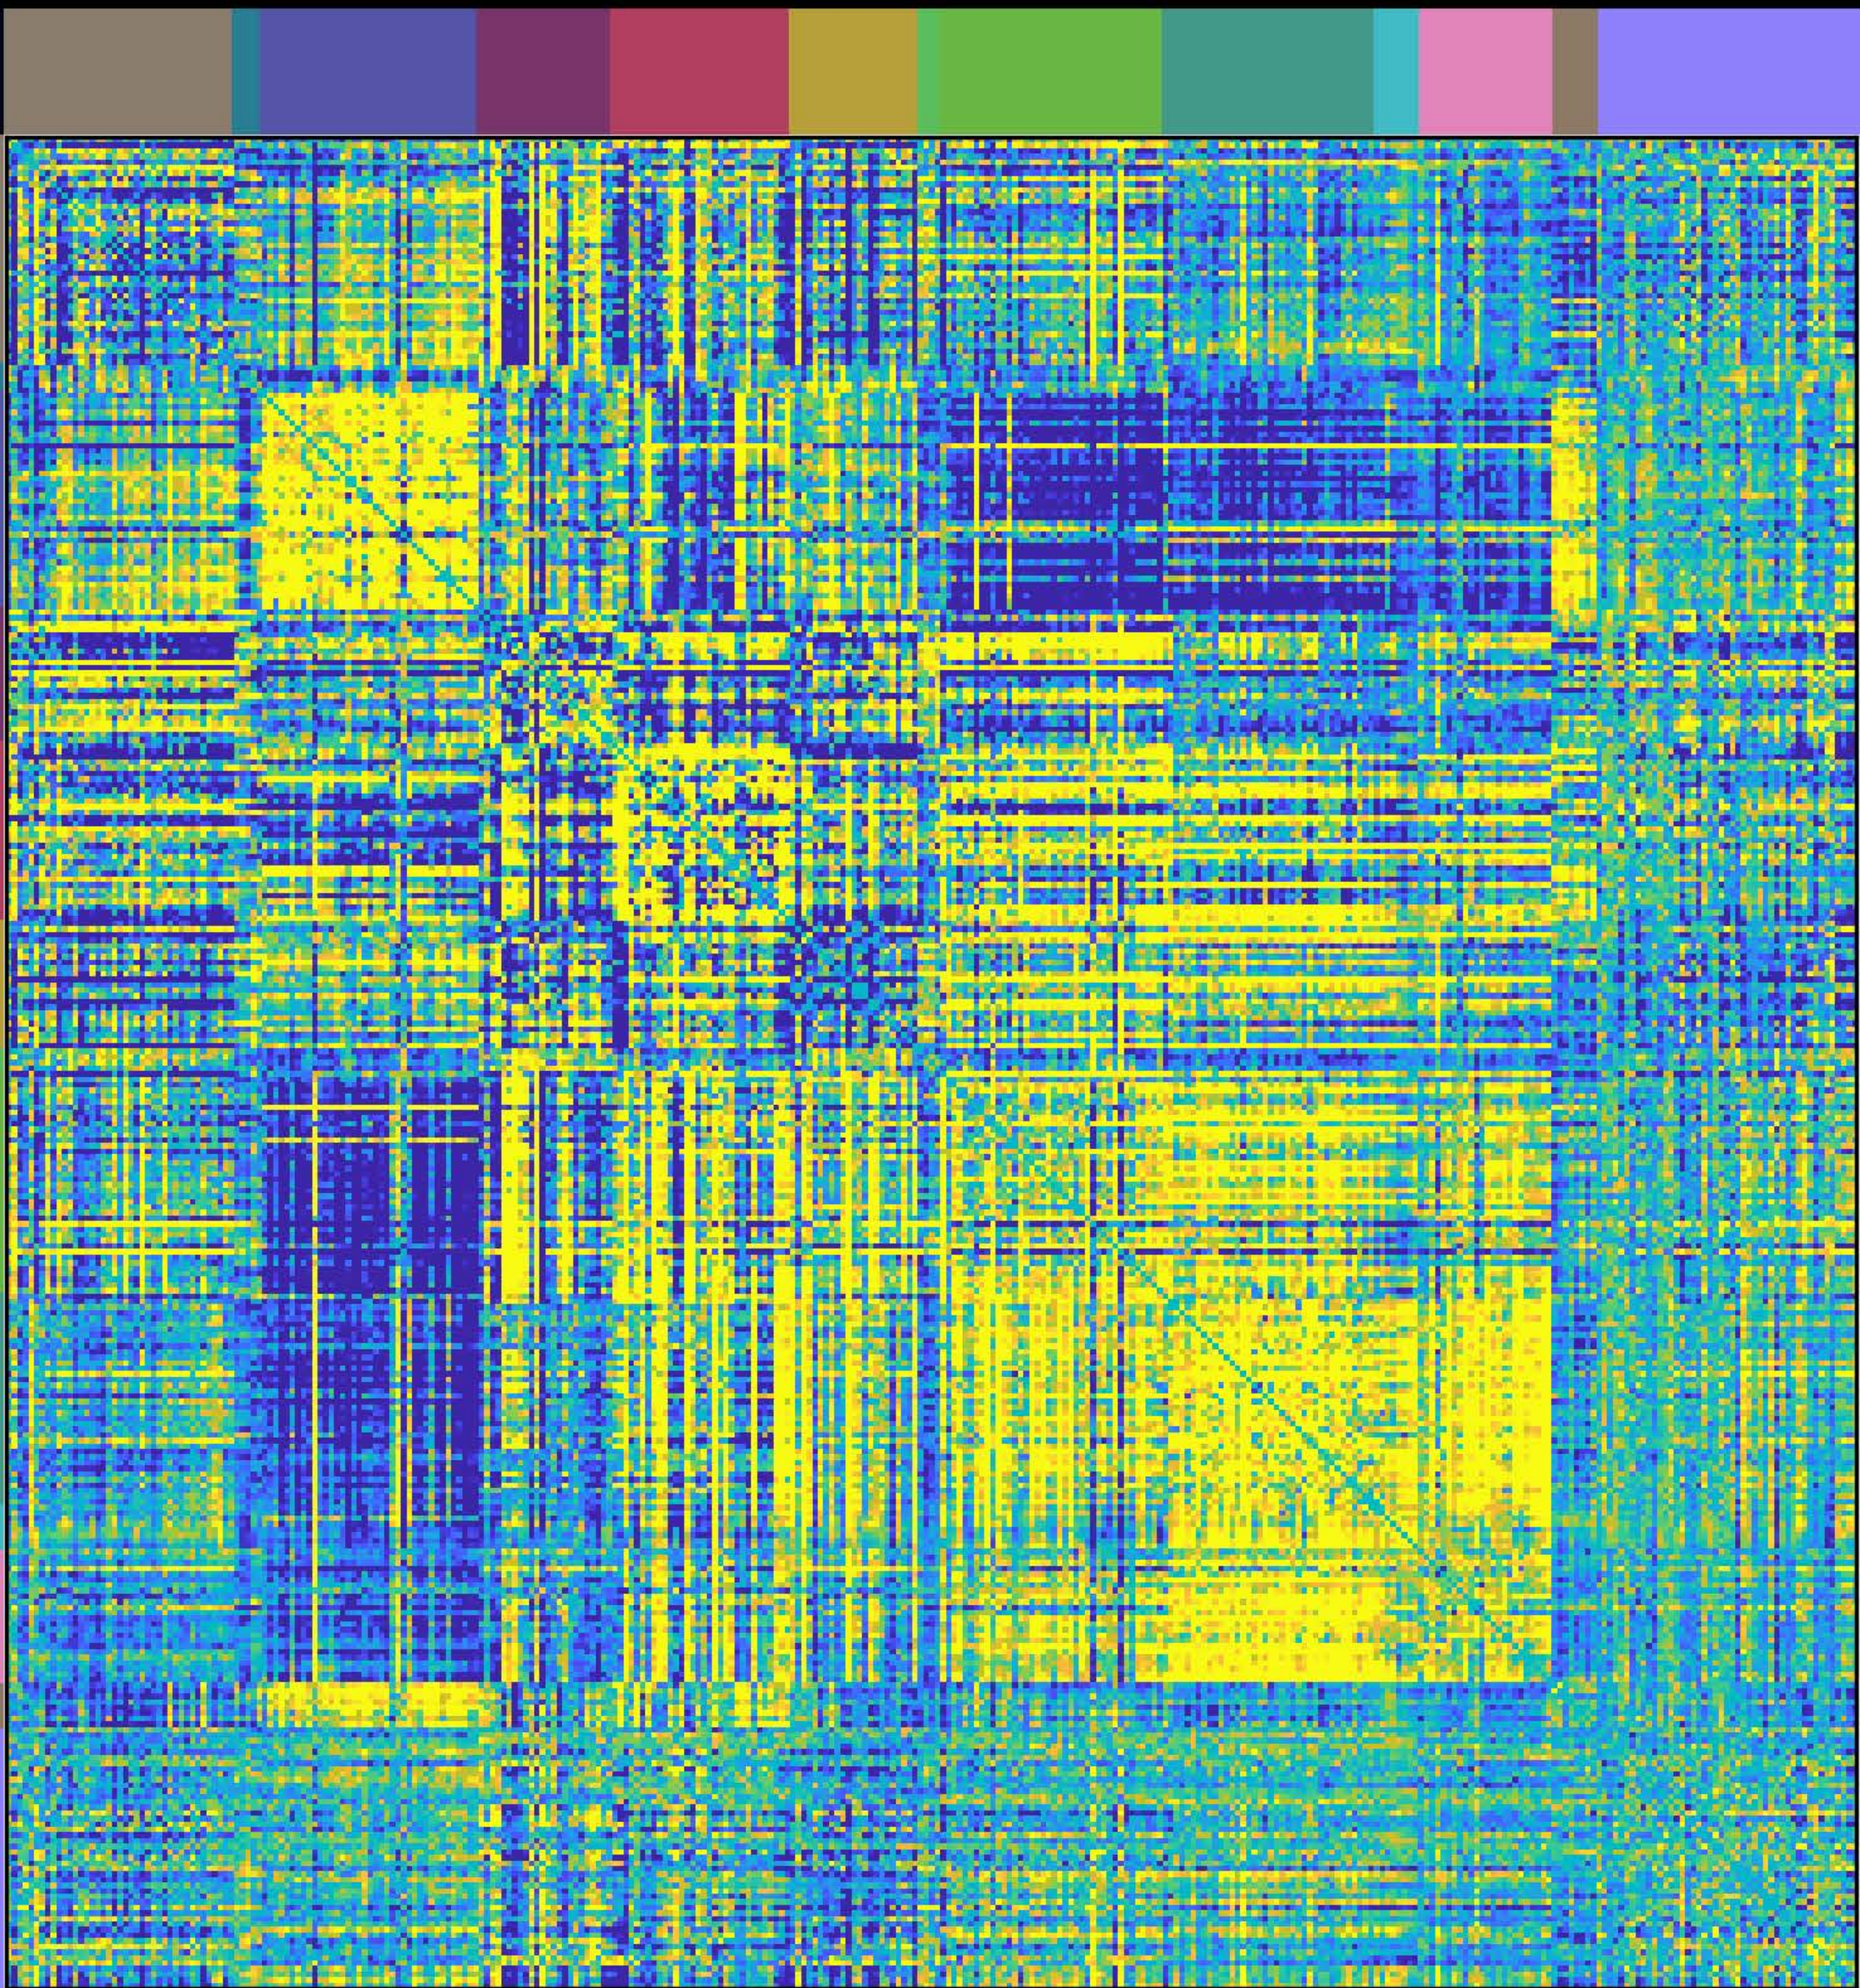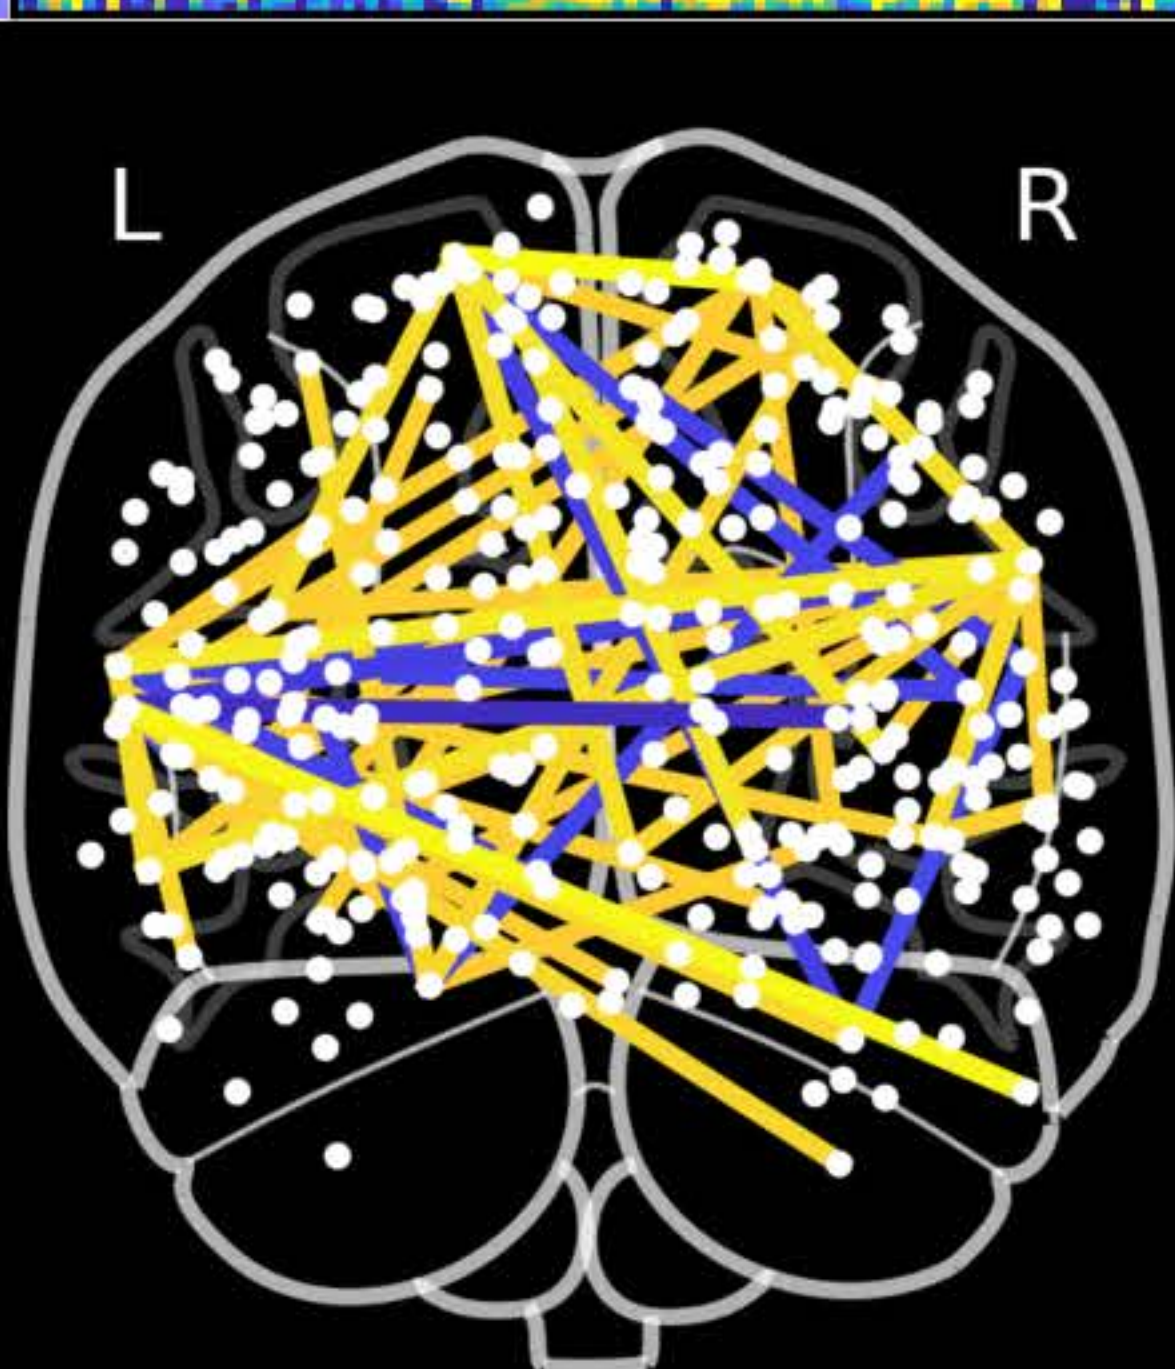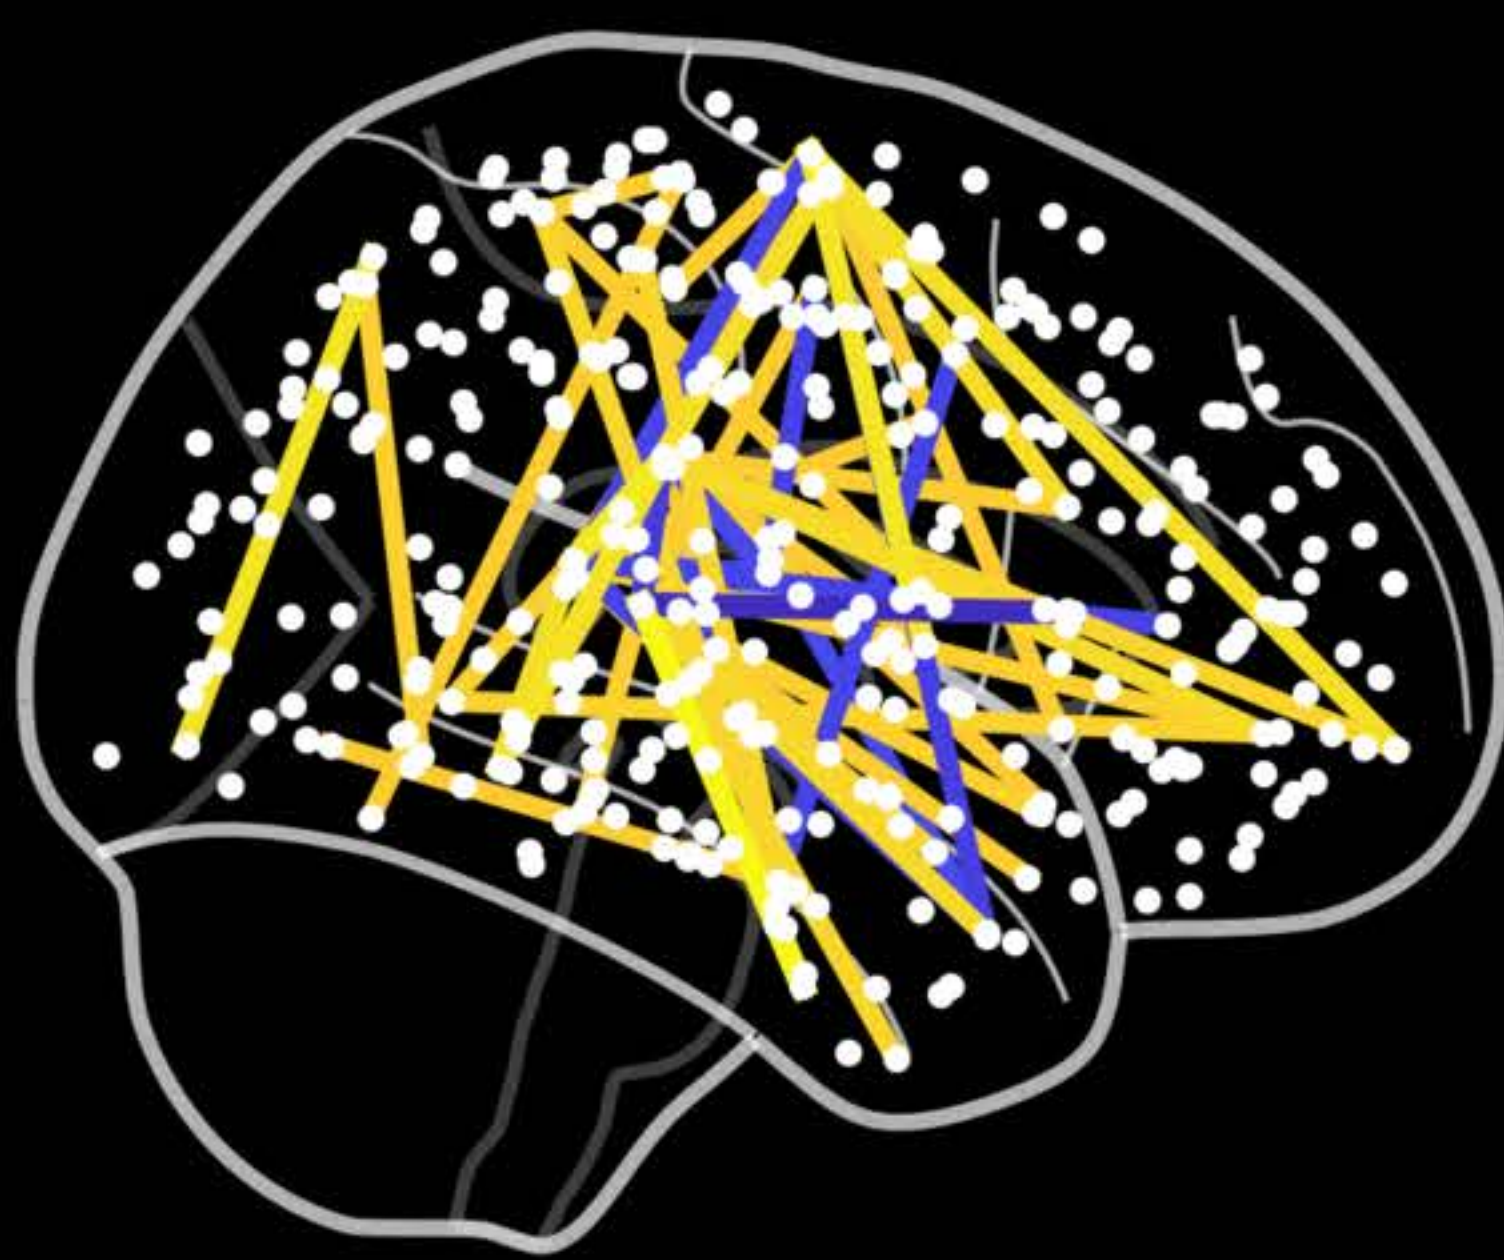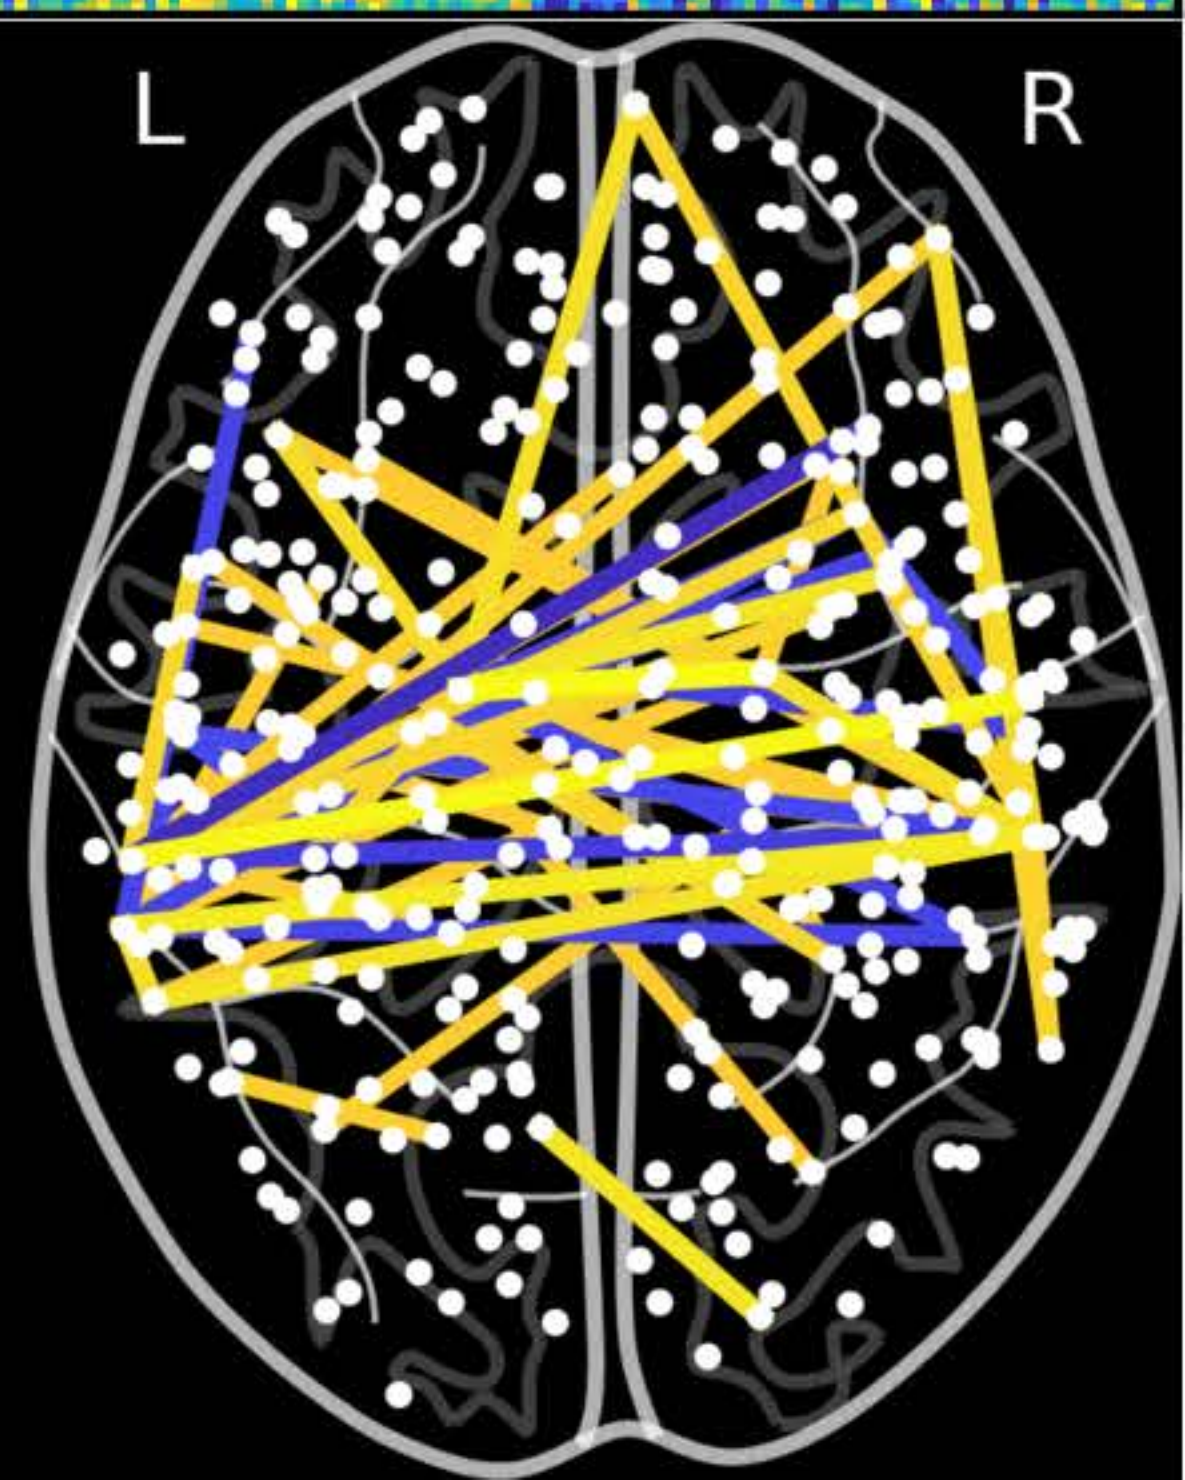



component\_3

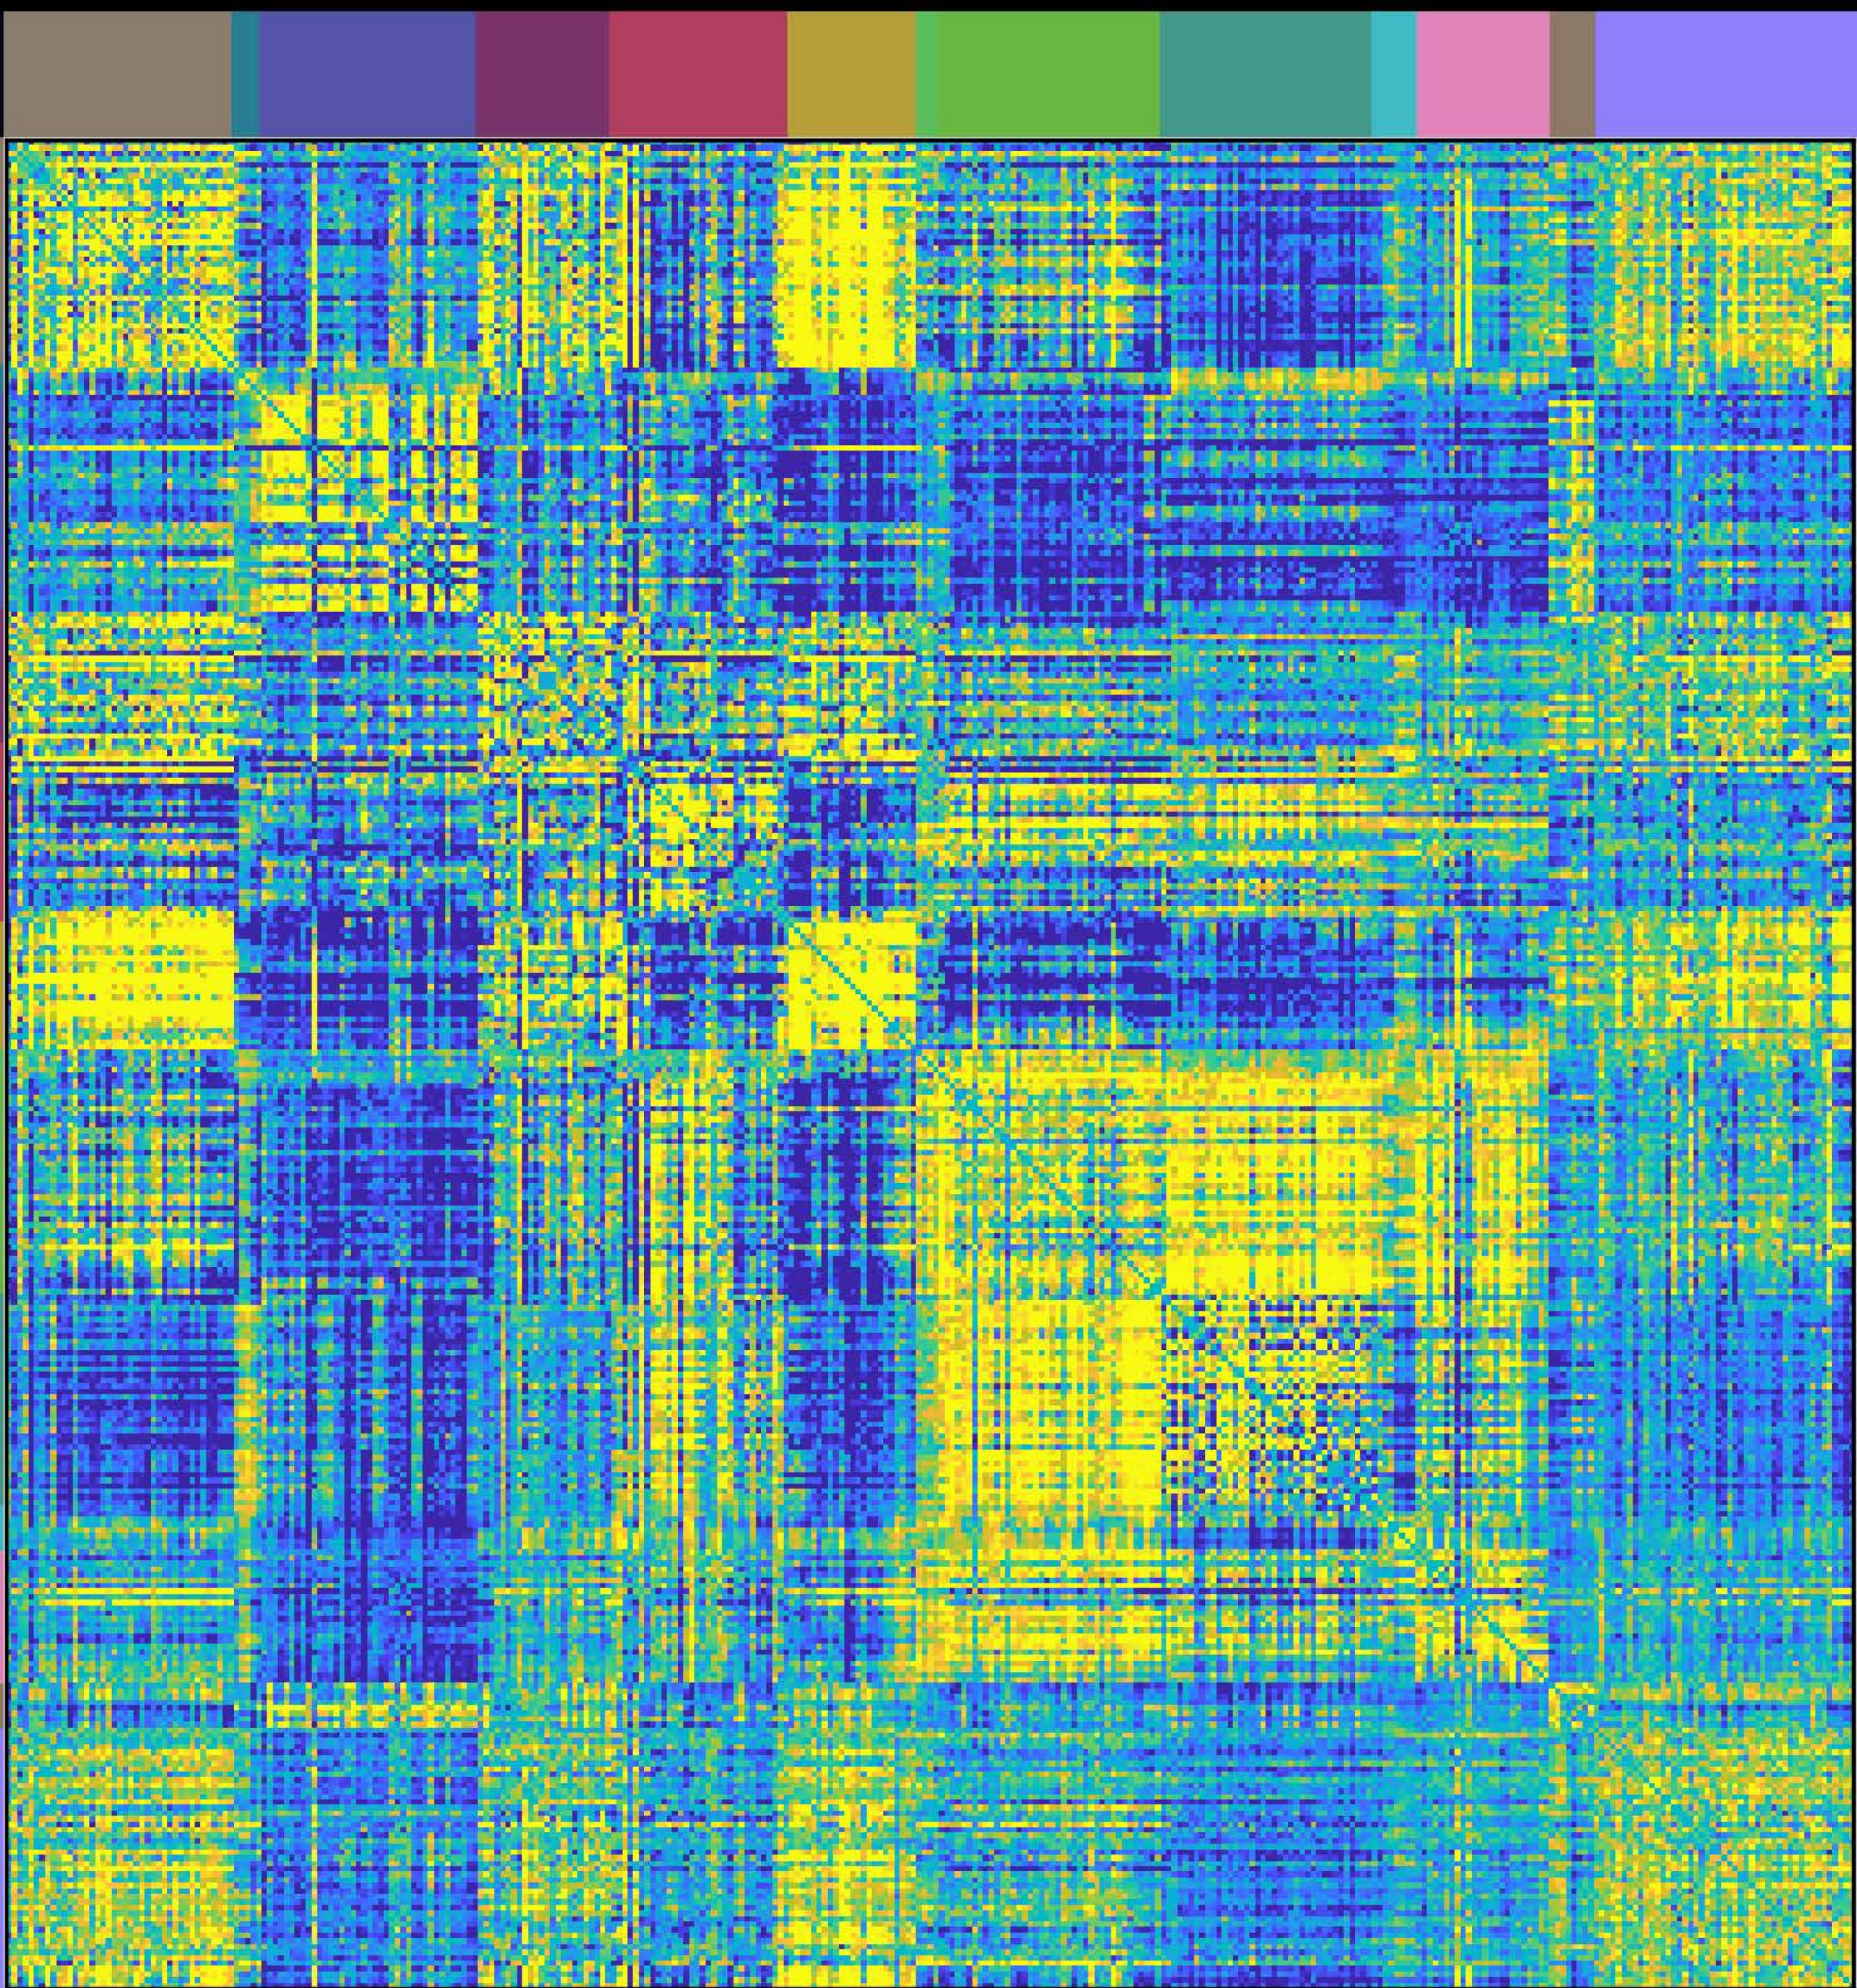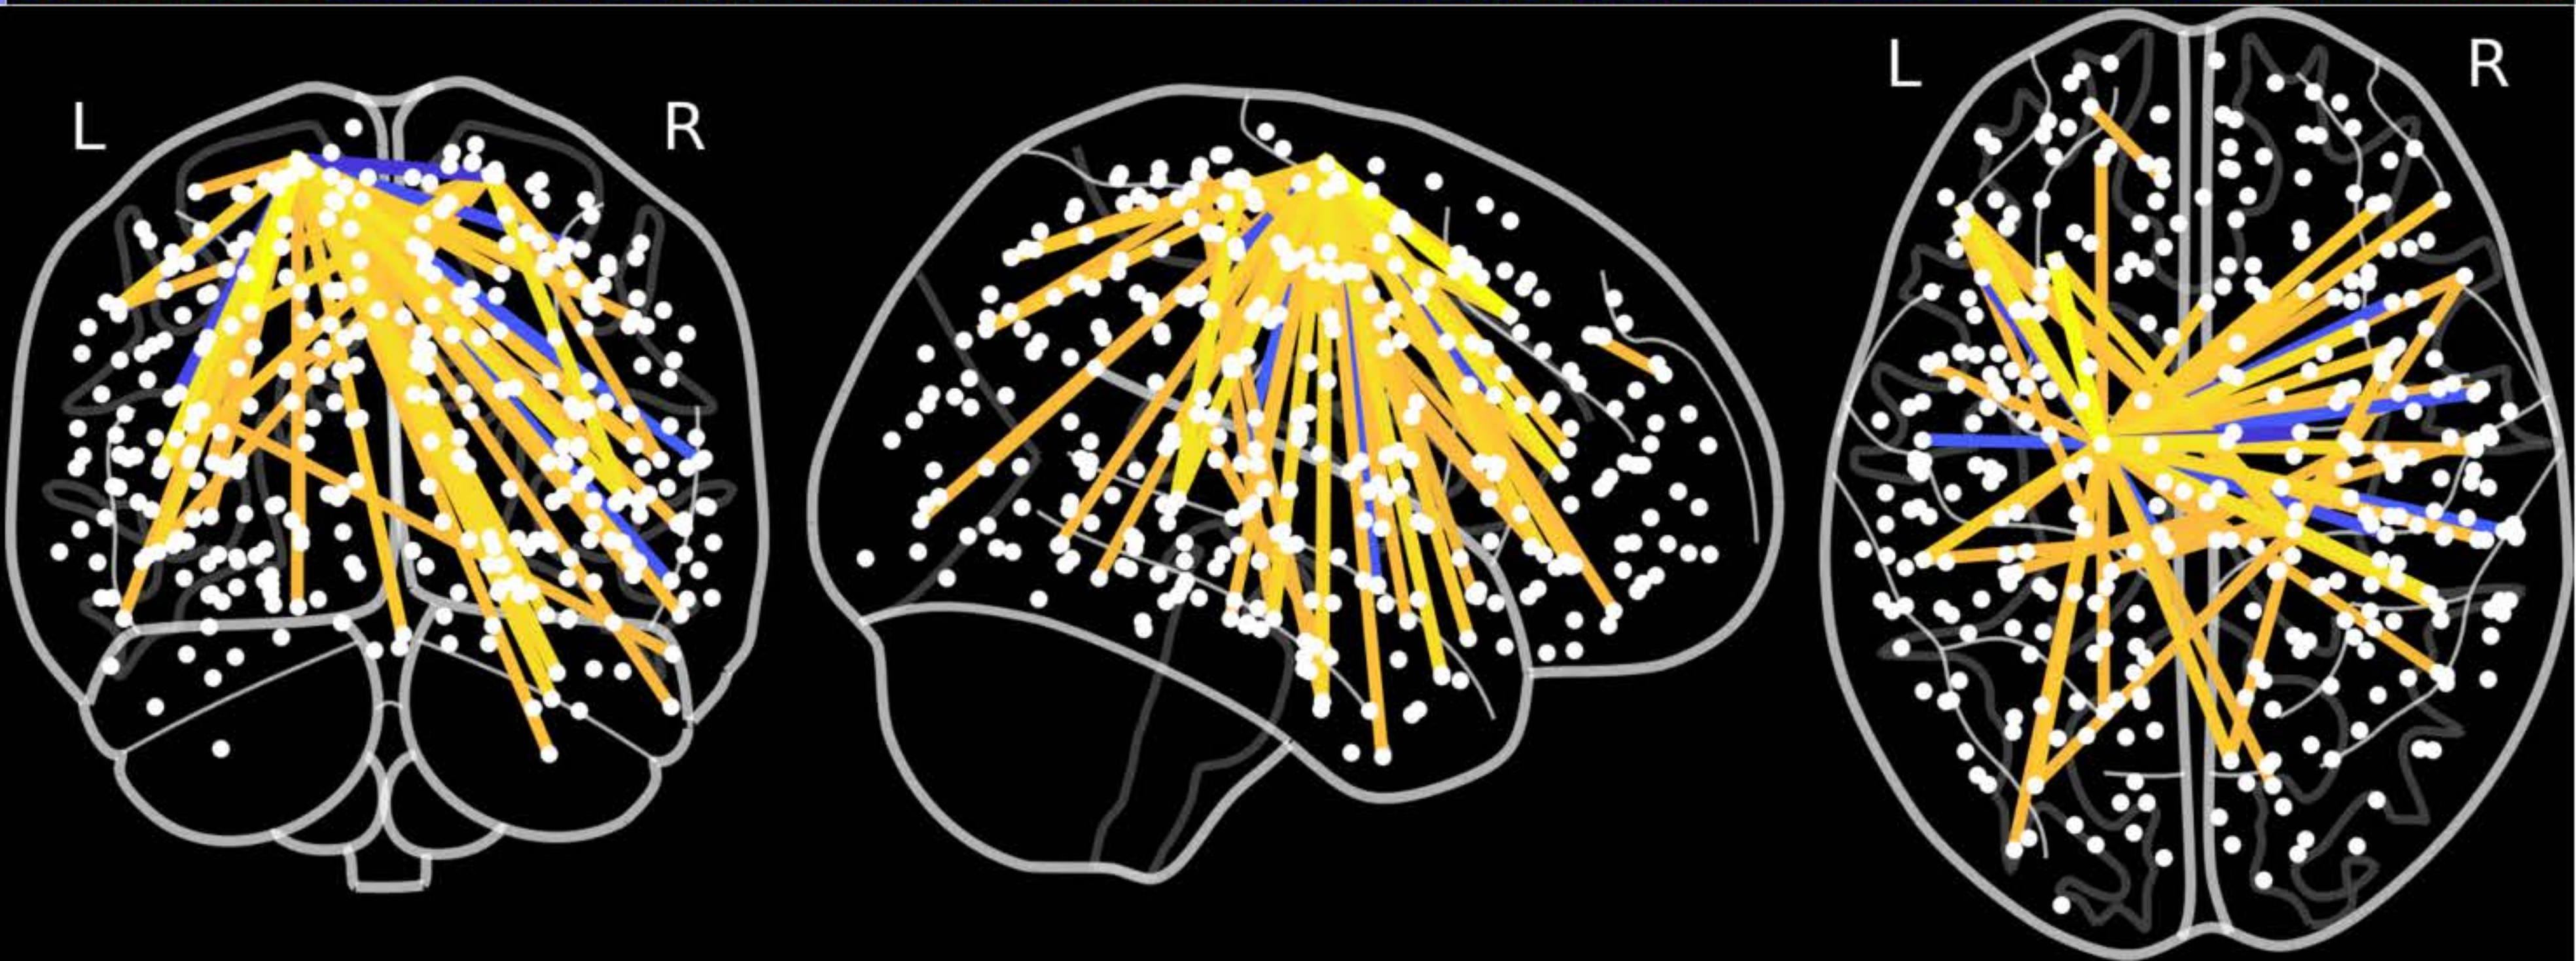



component\_4

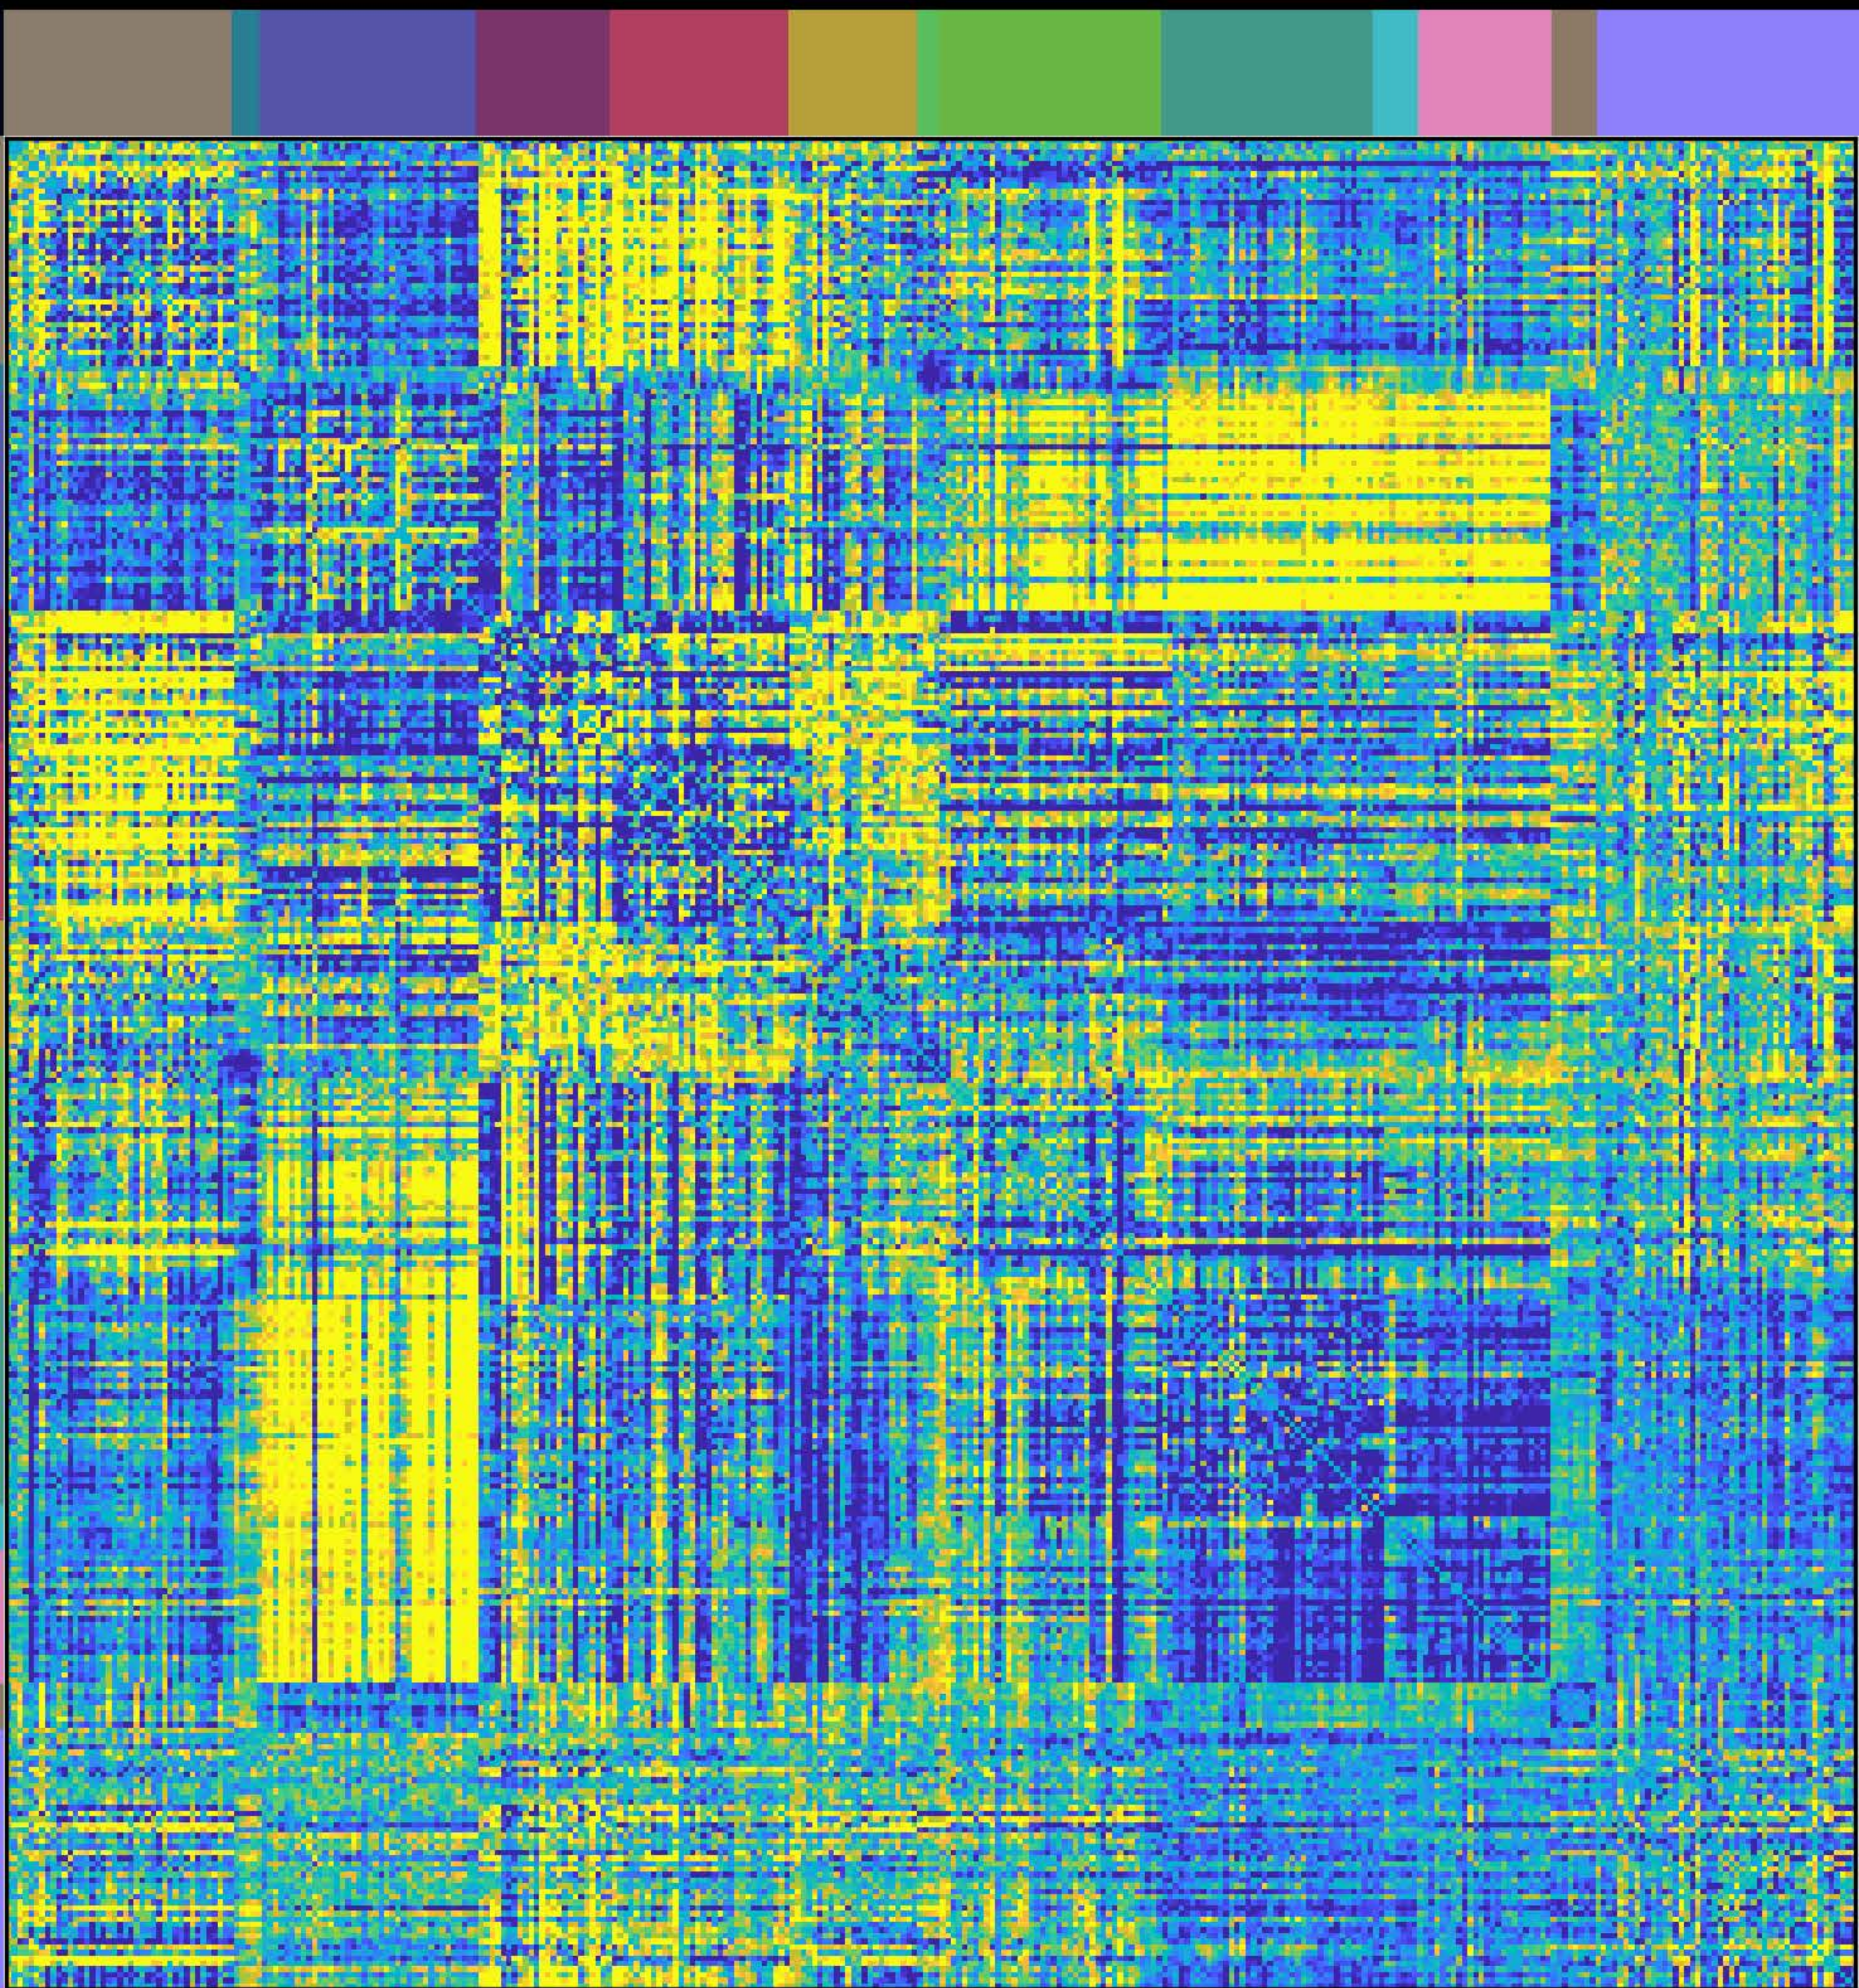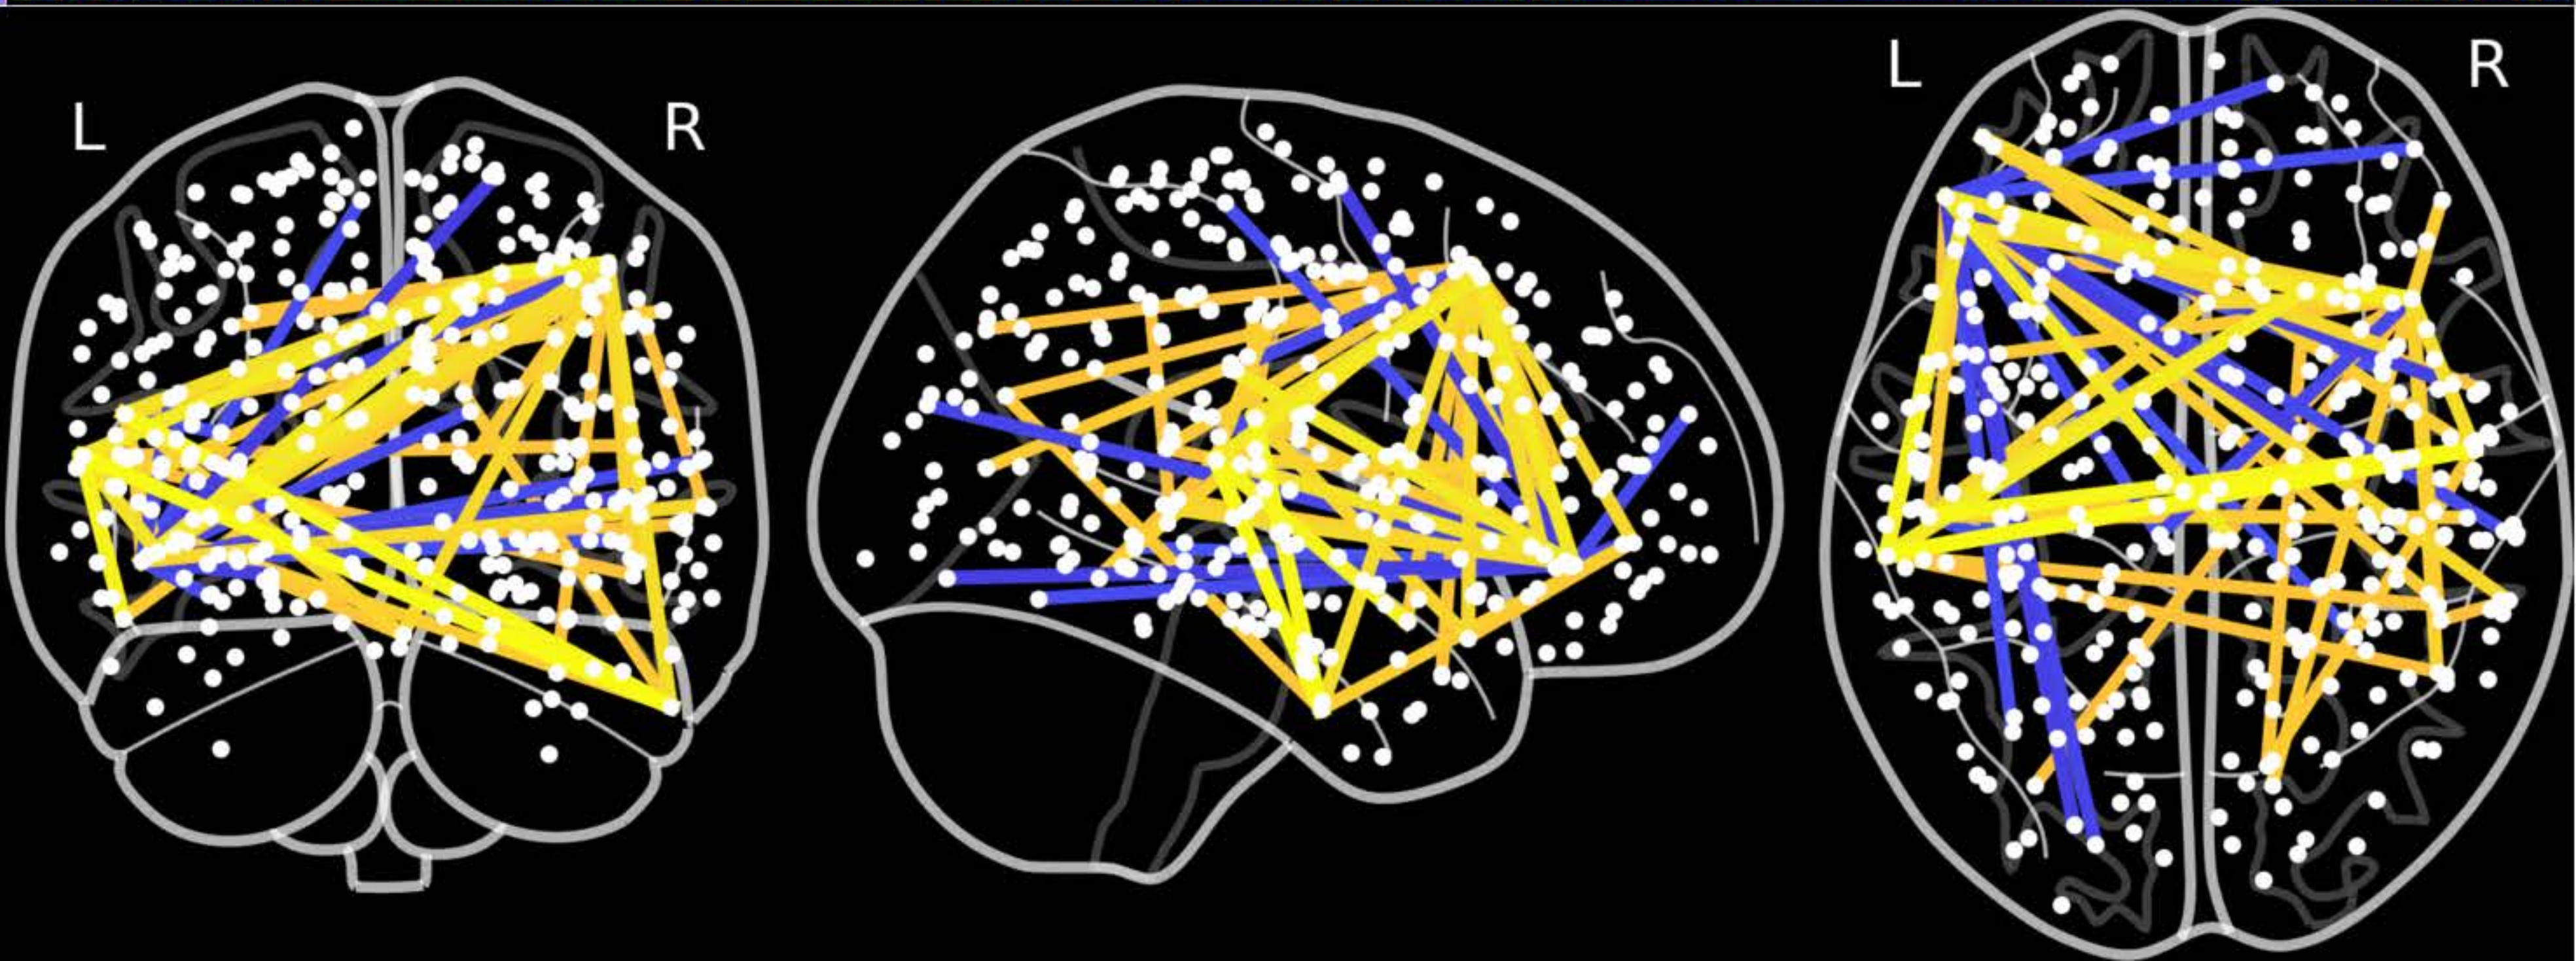



component\_5

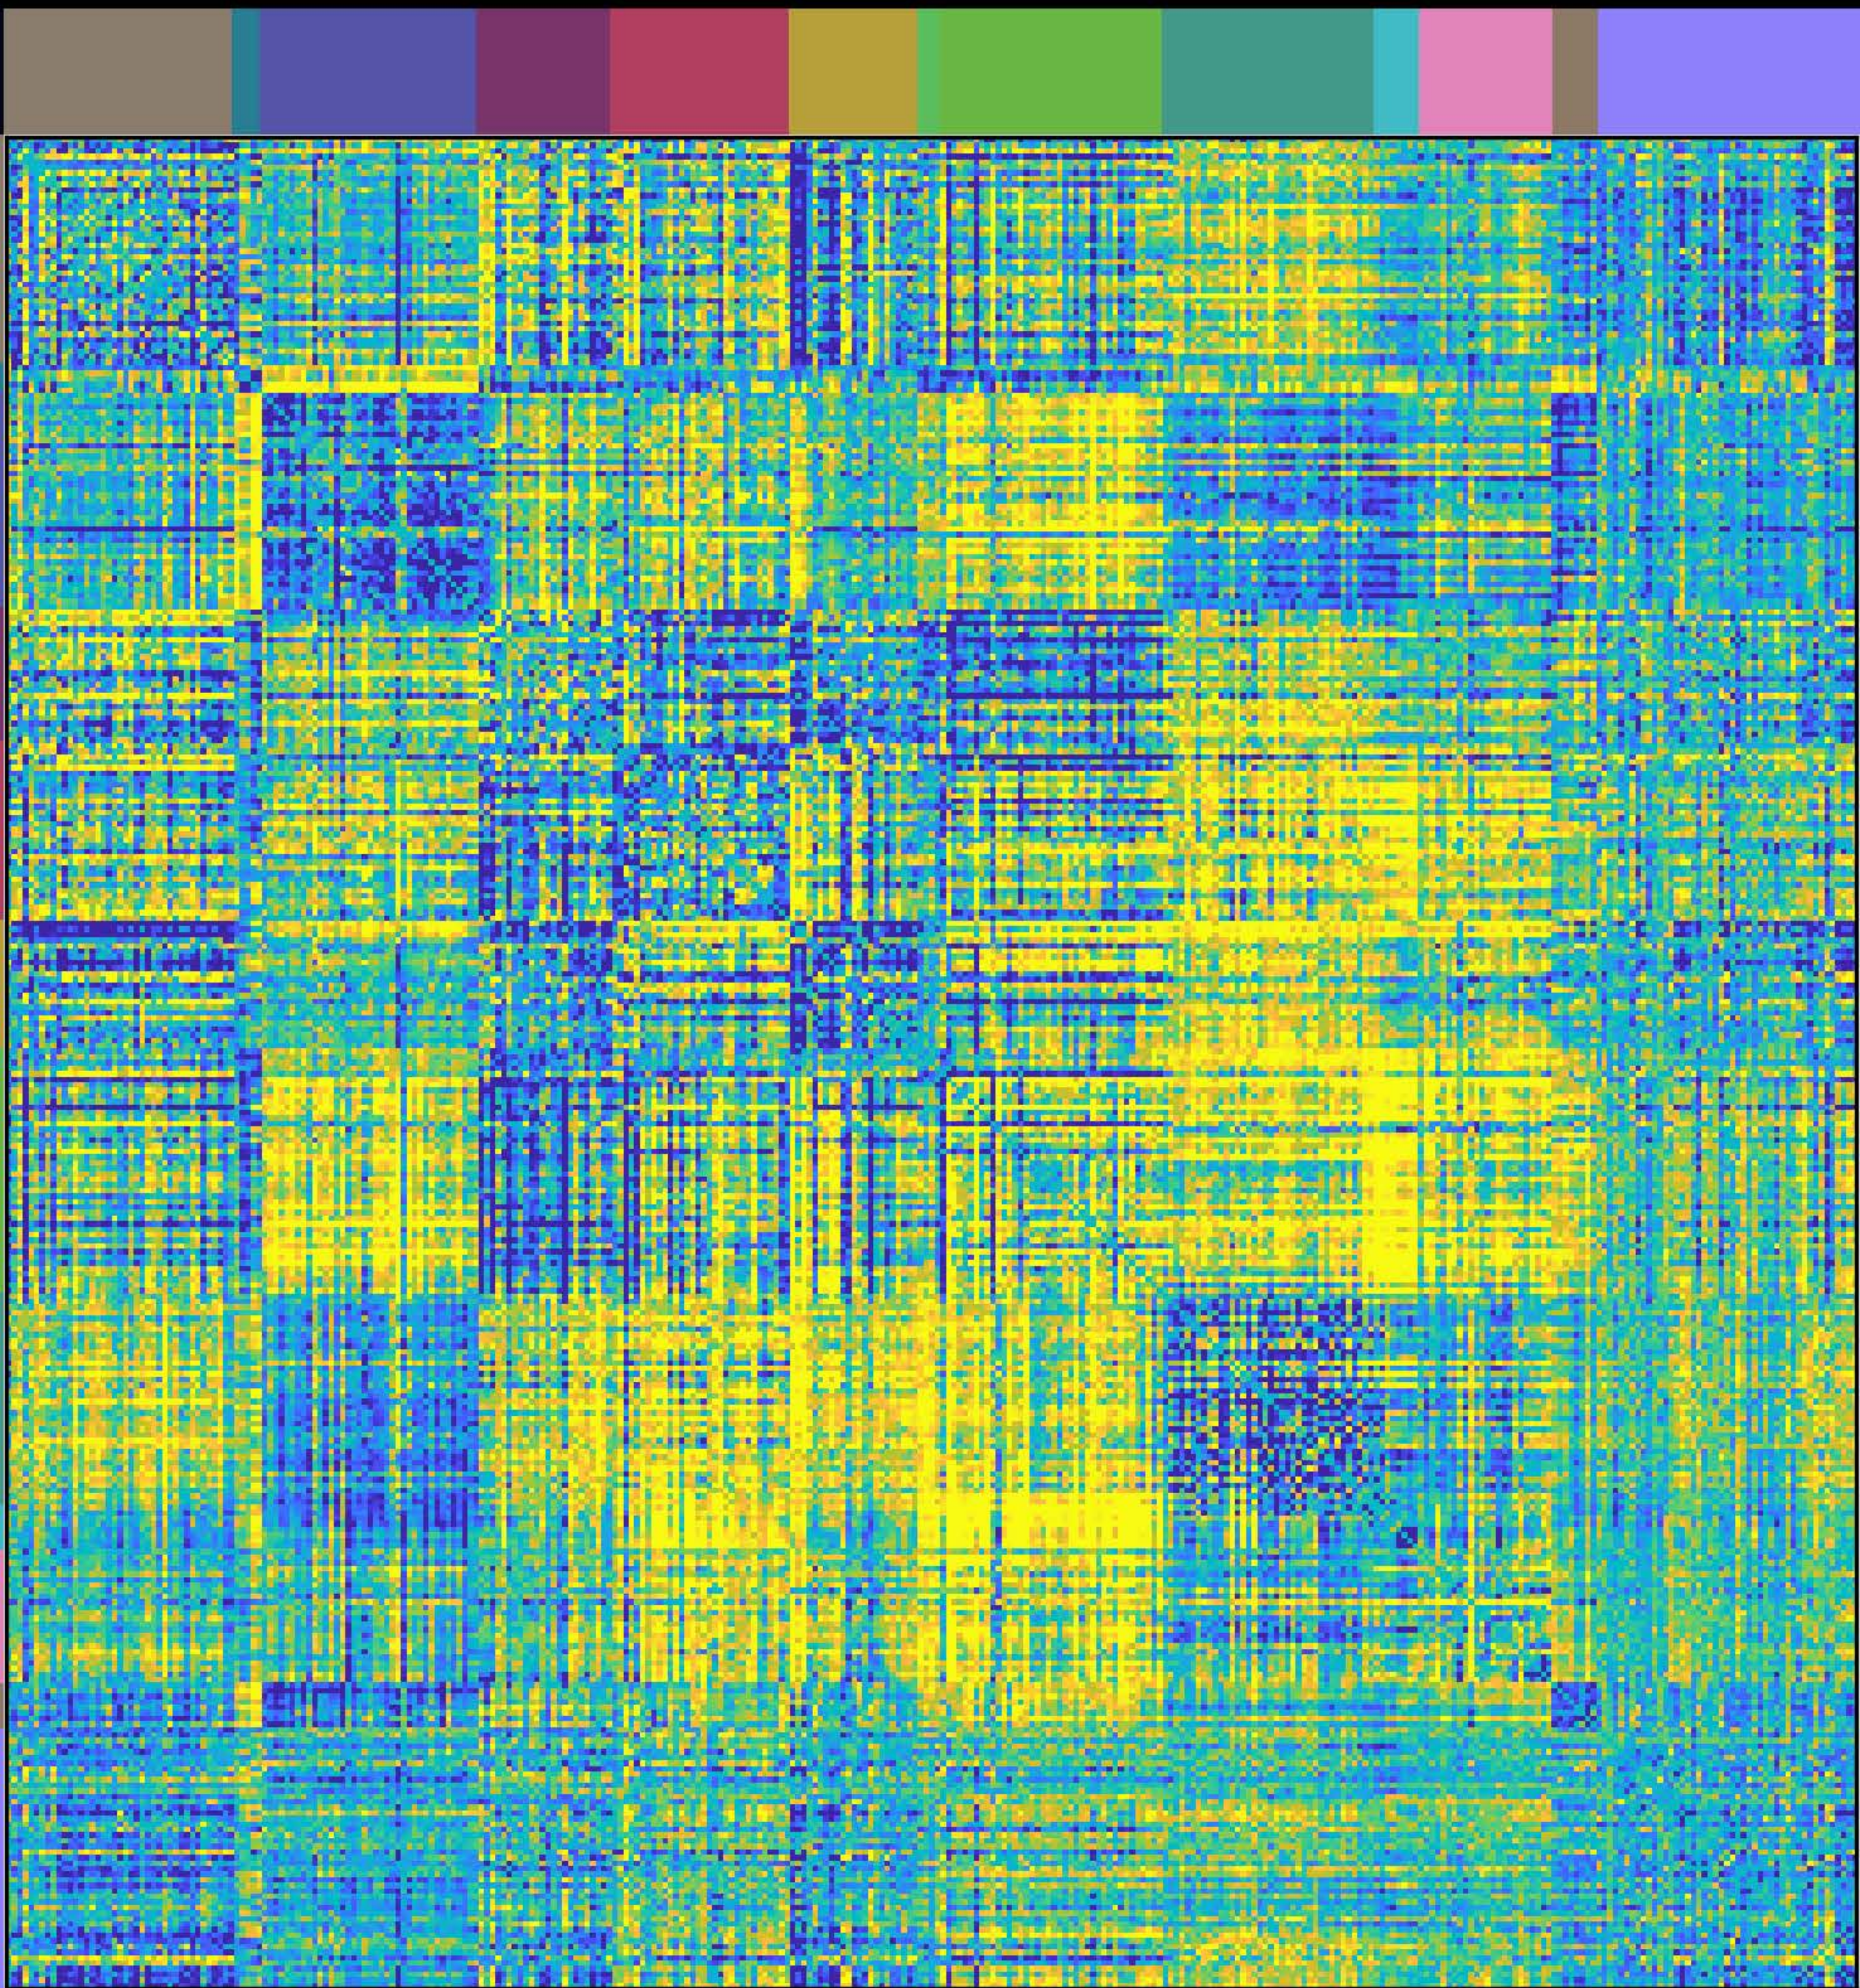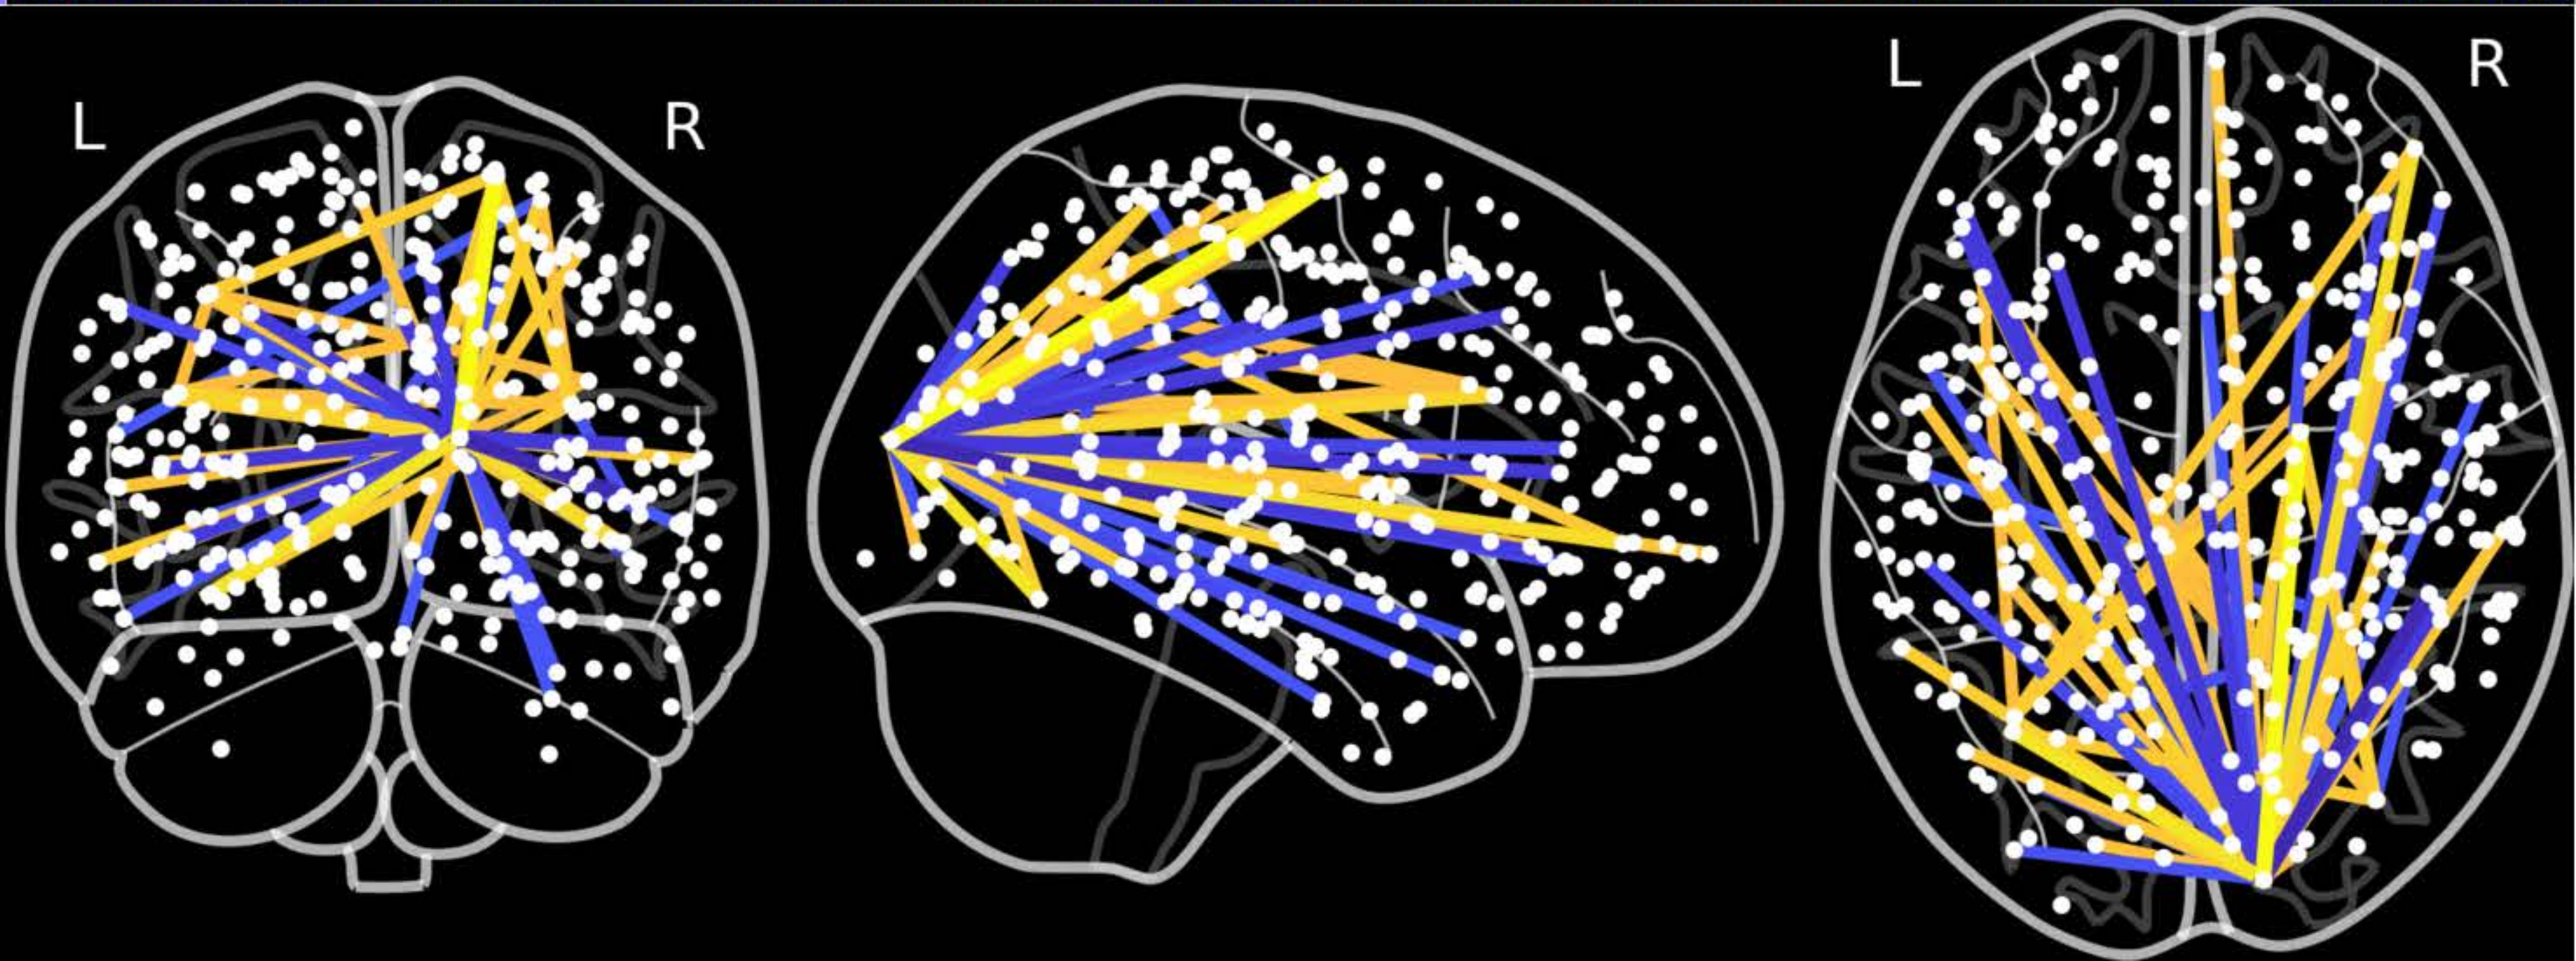



component\_6

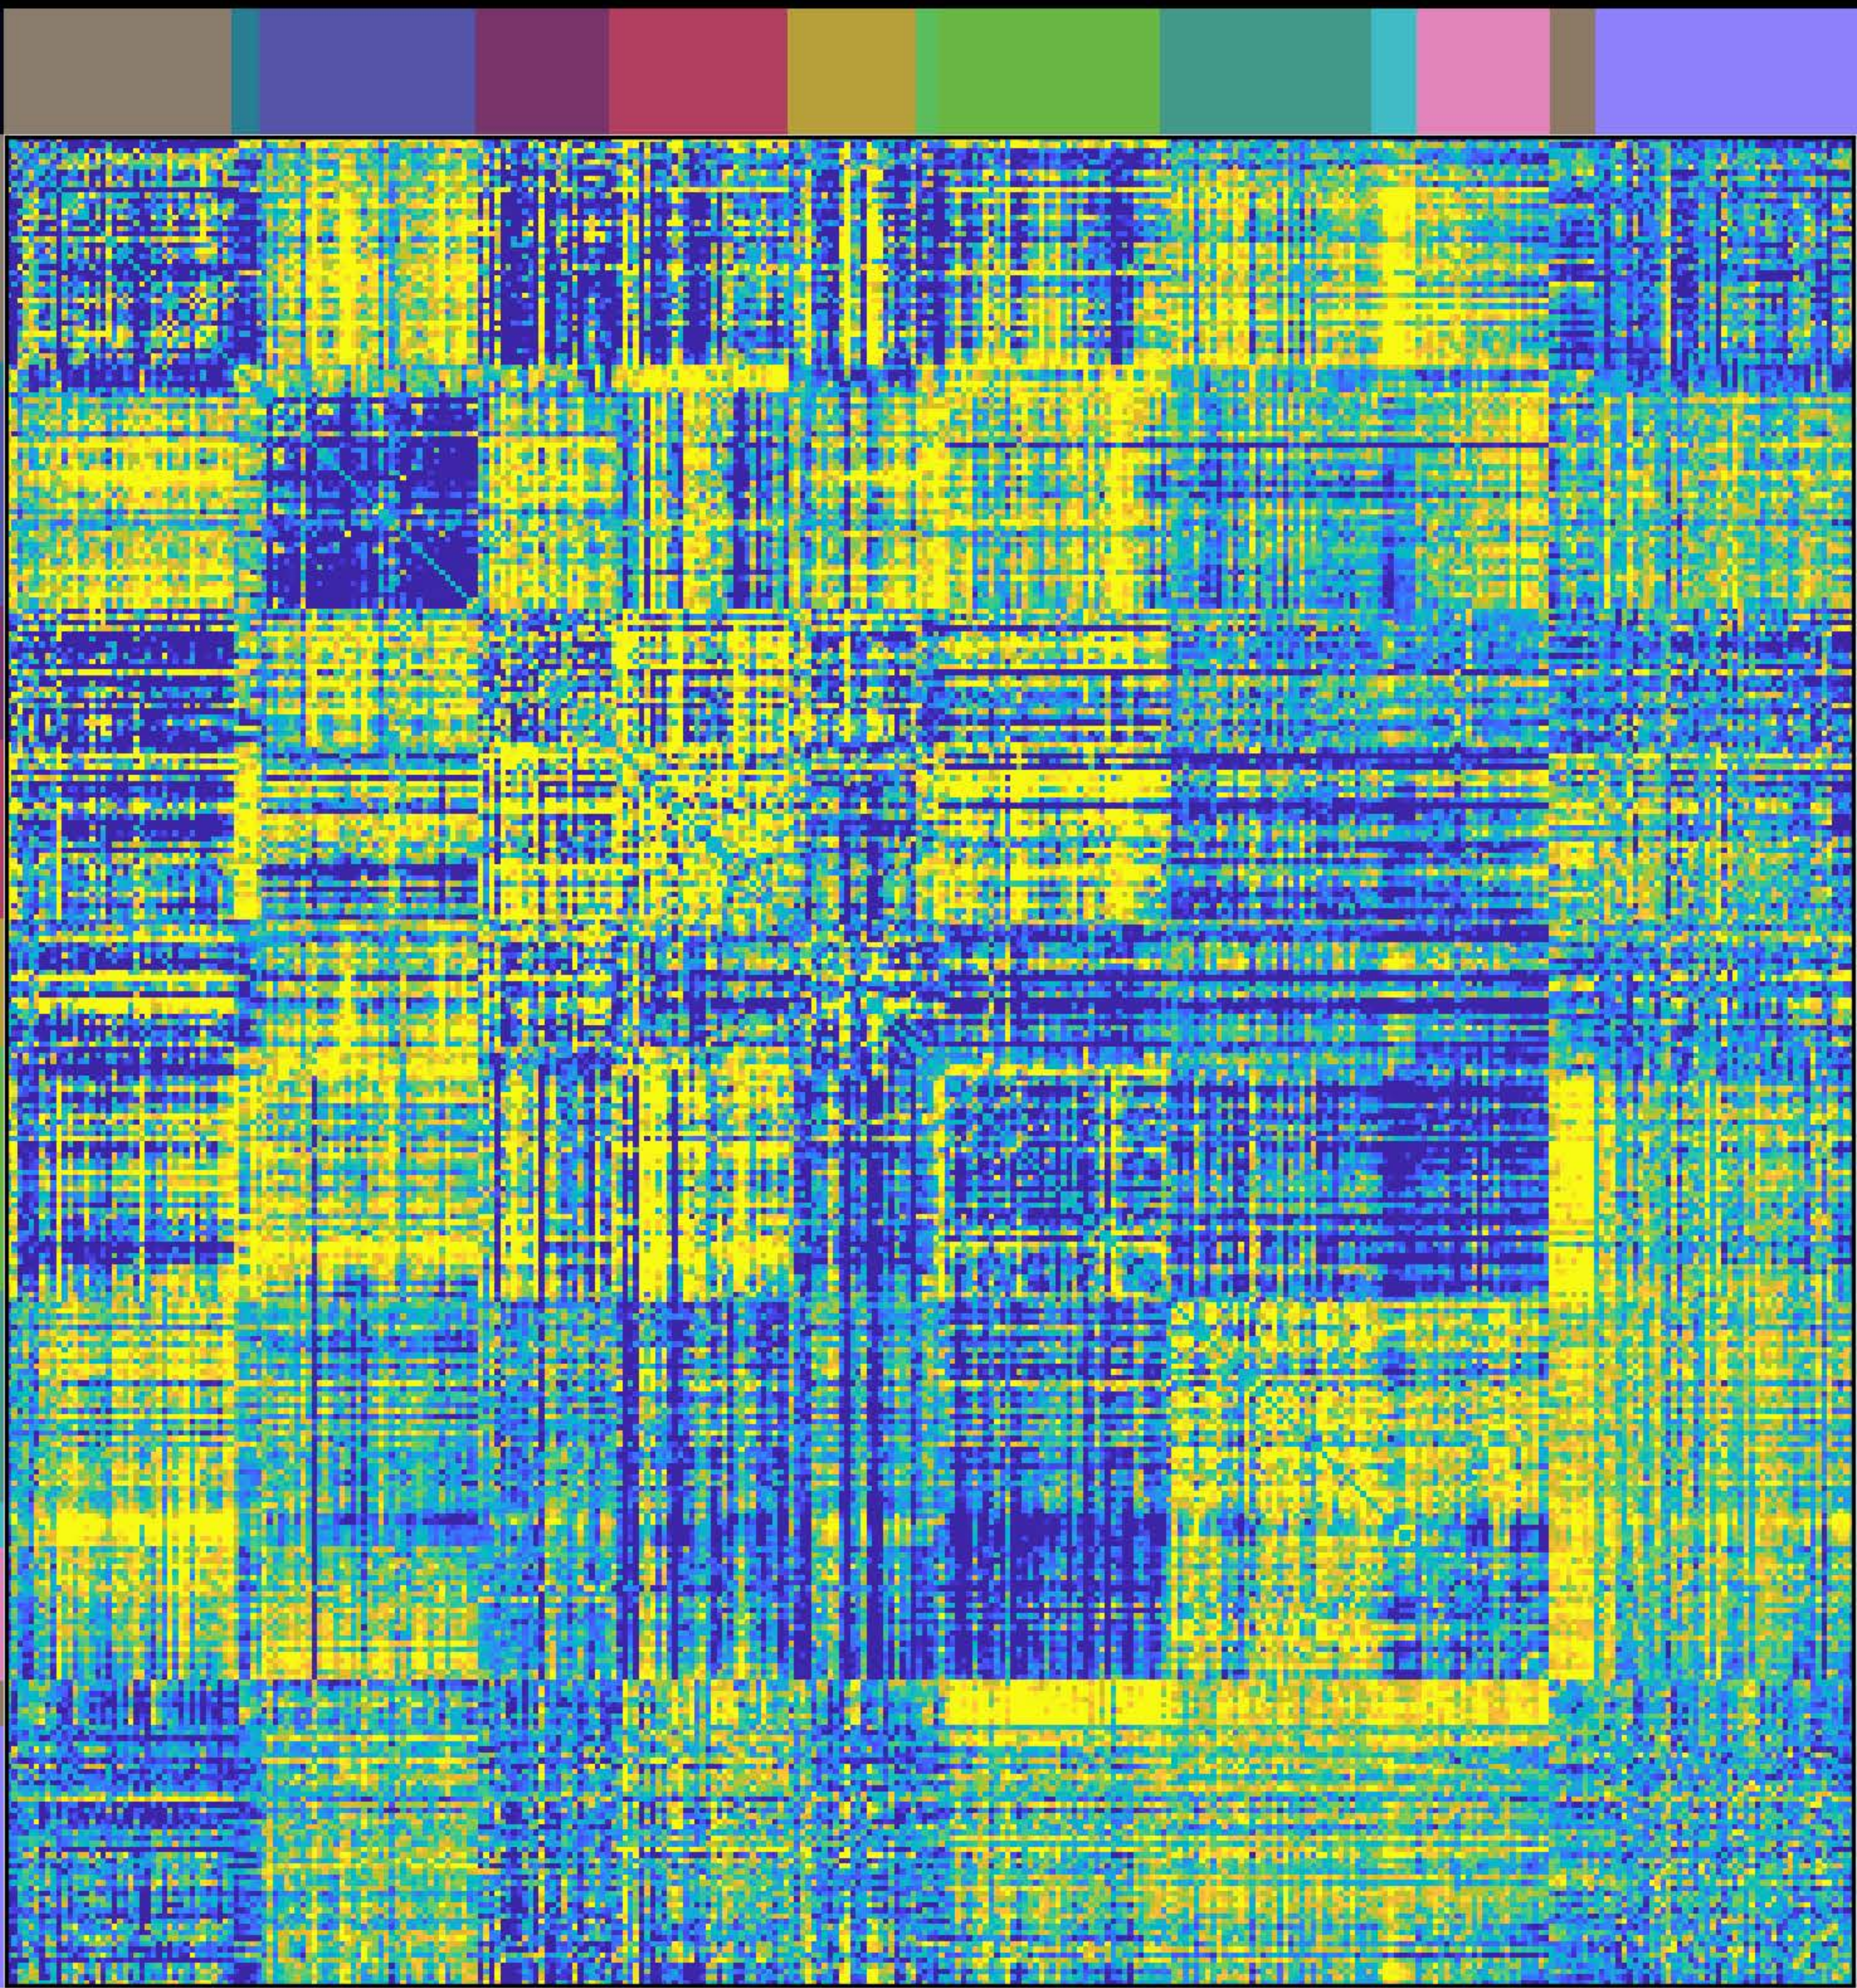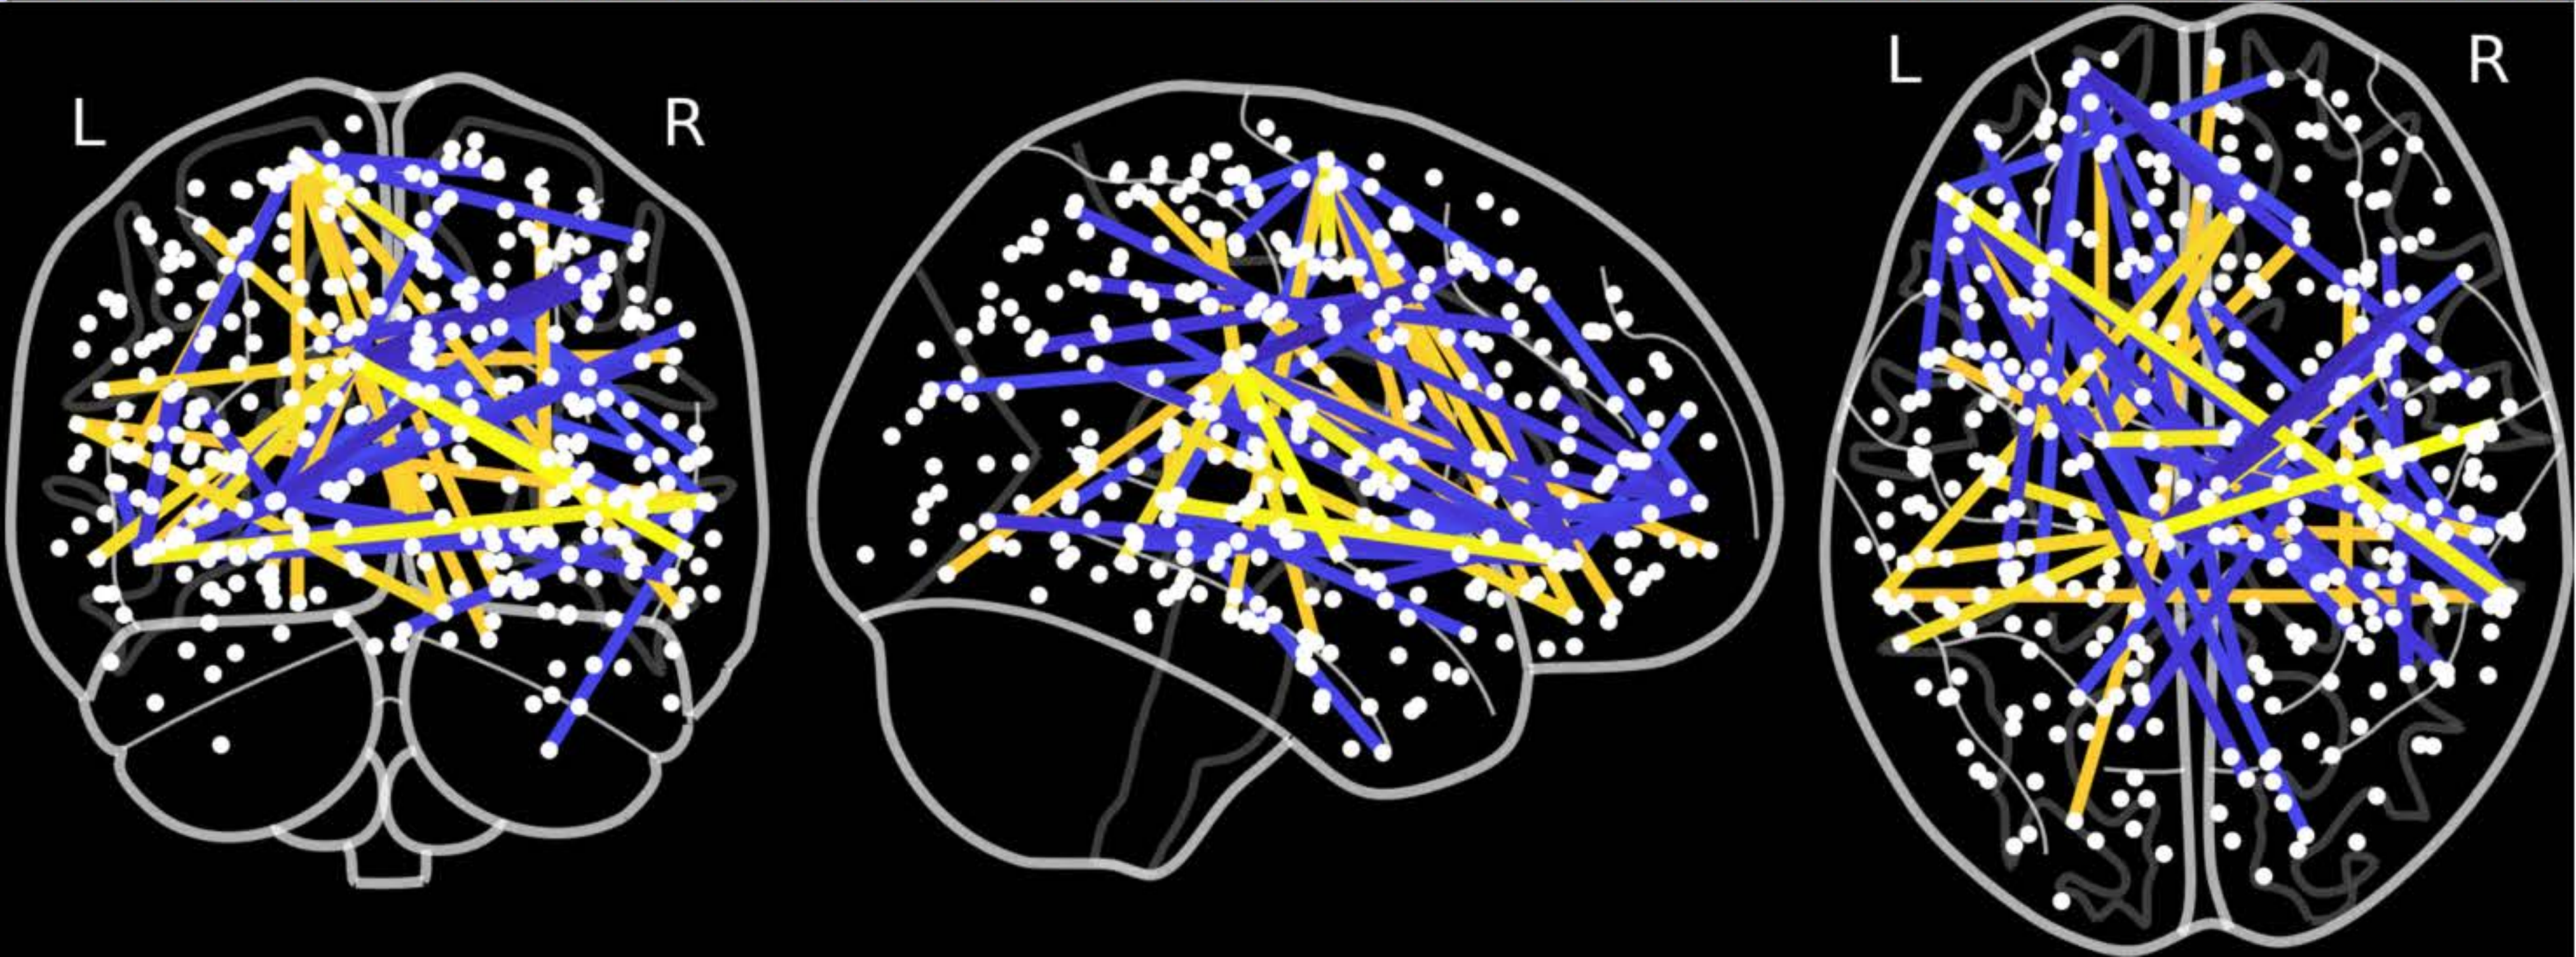



component\_7

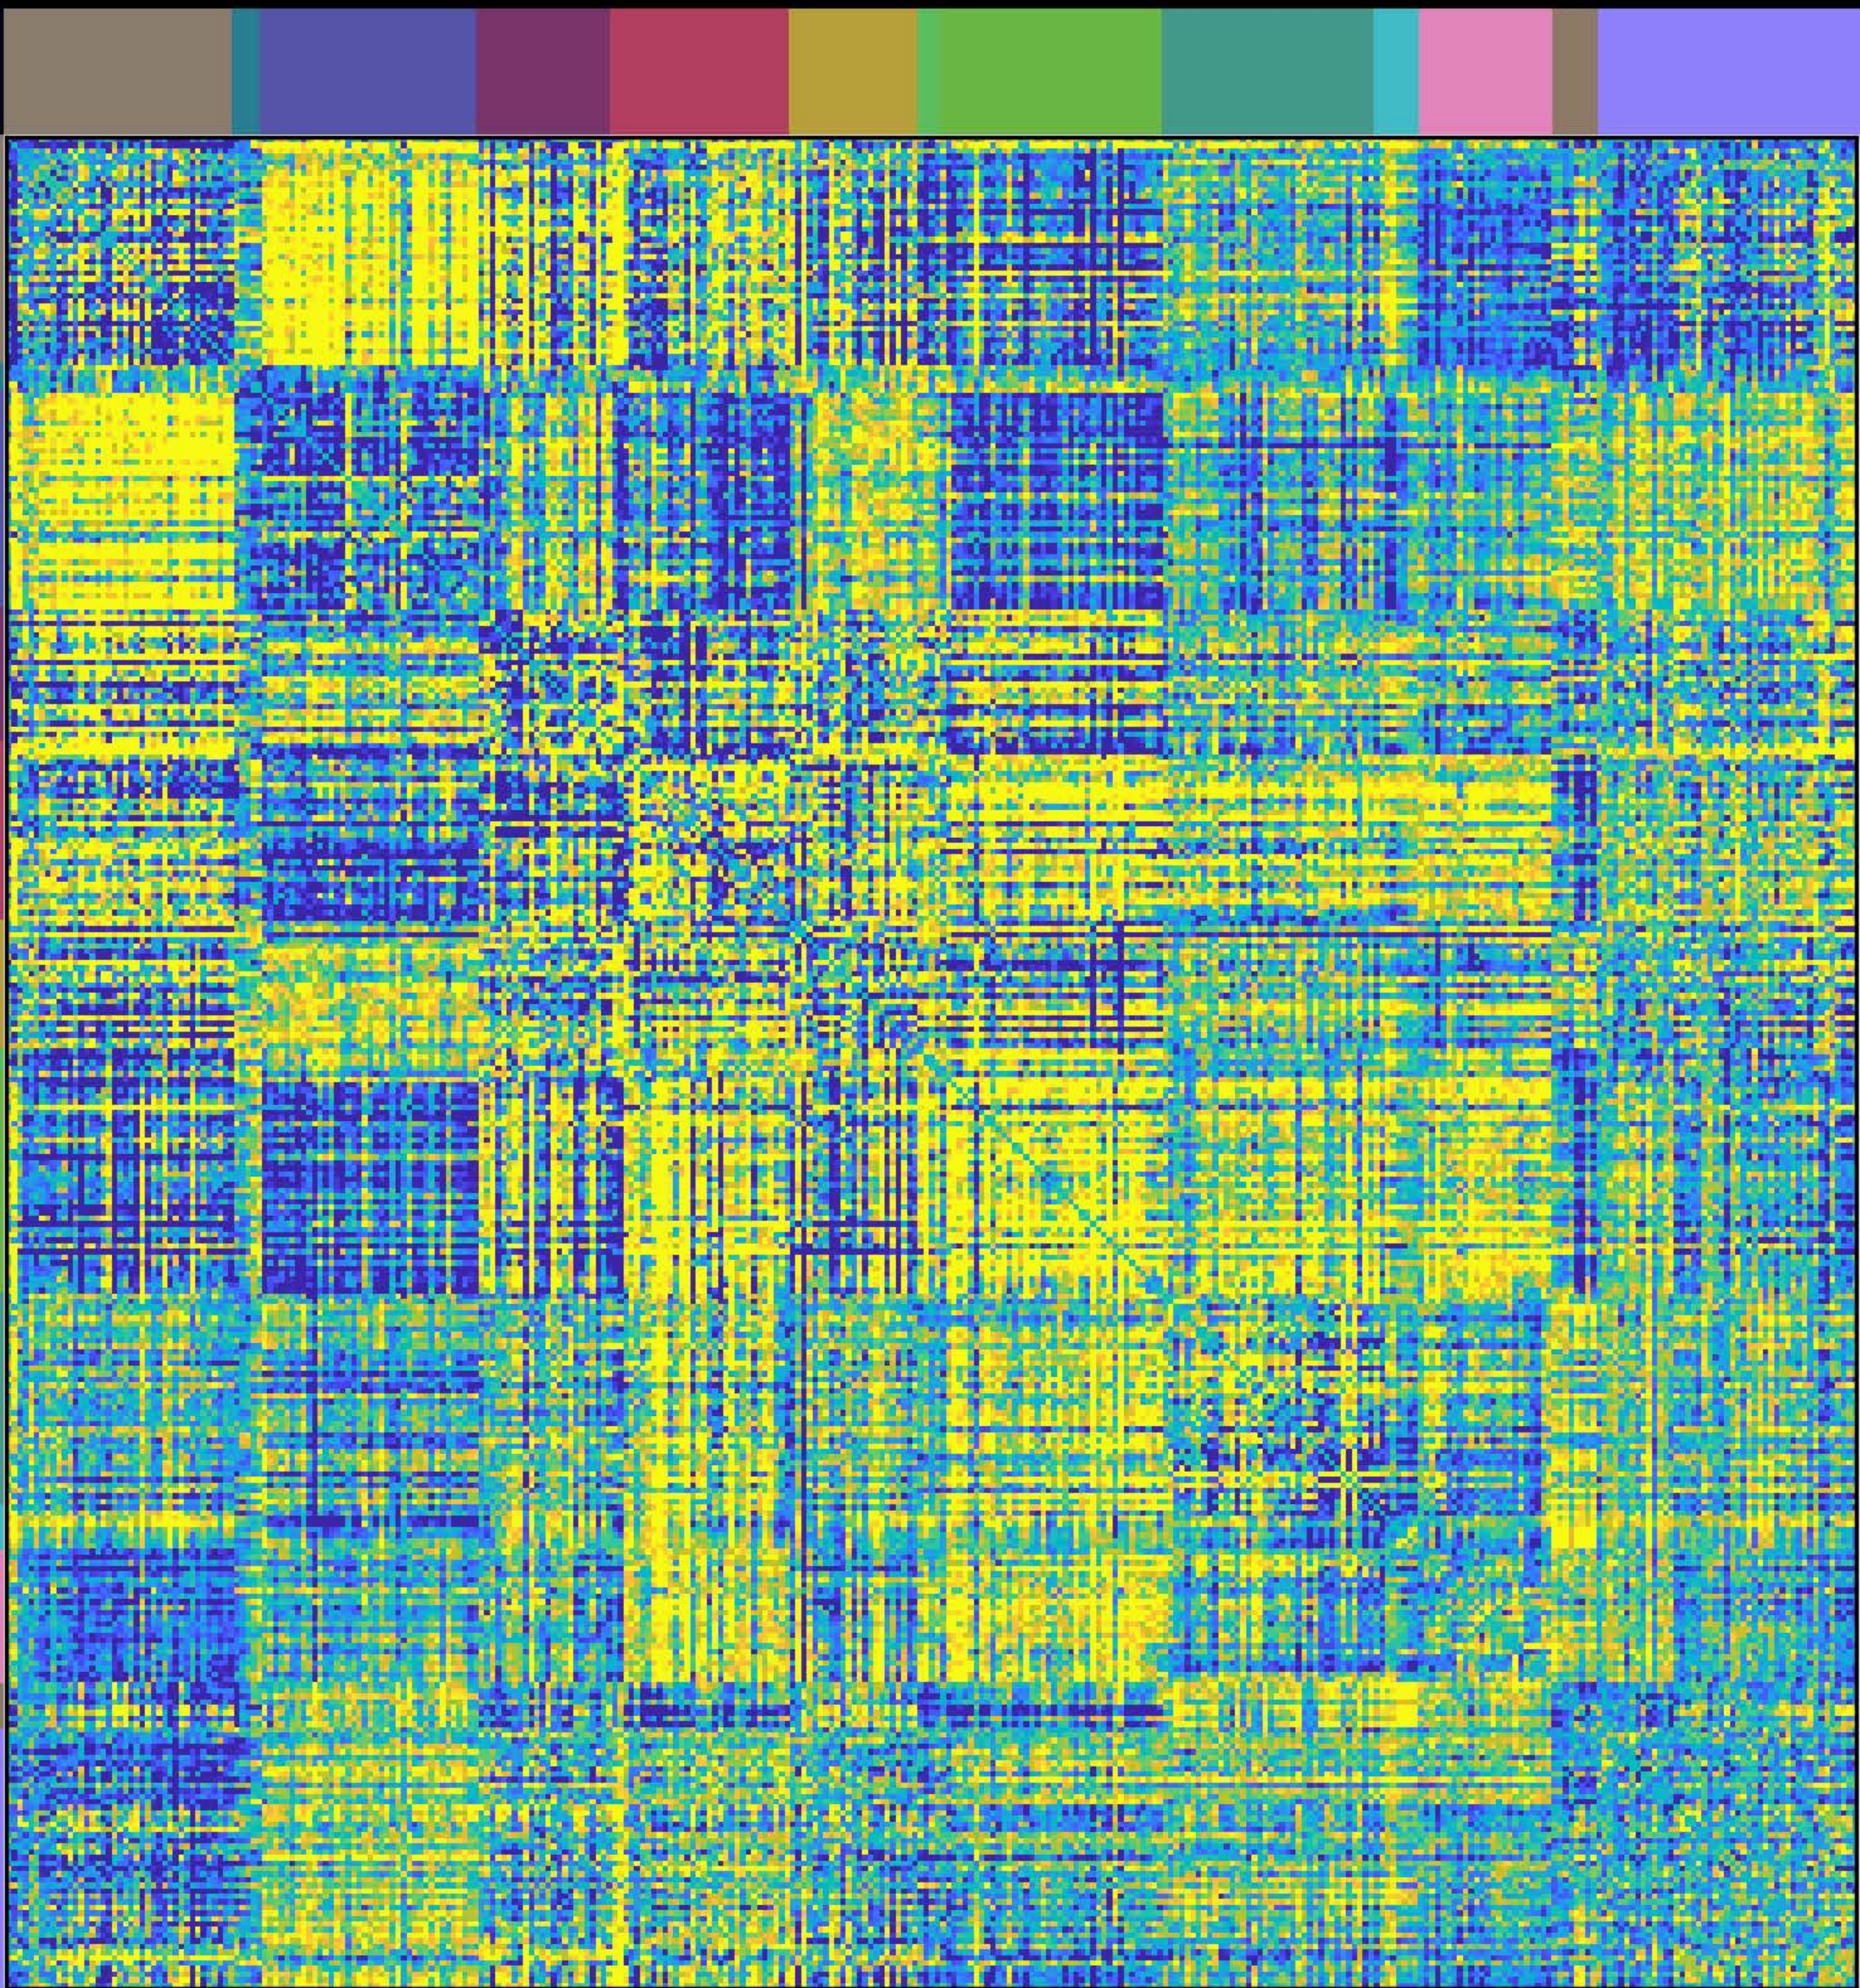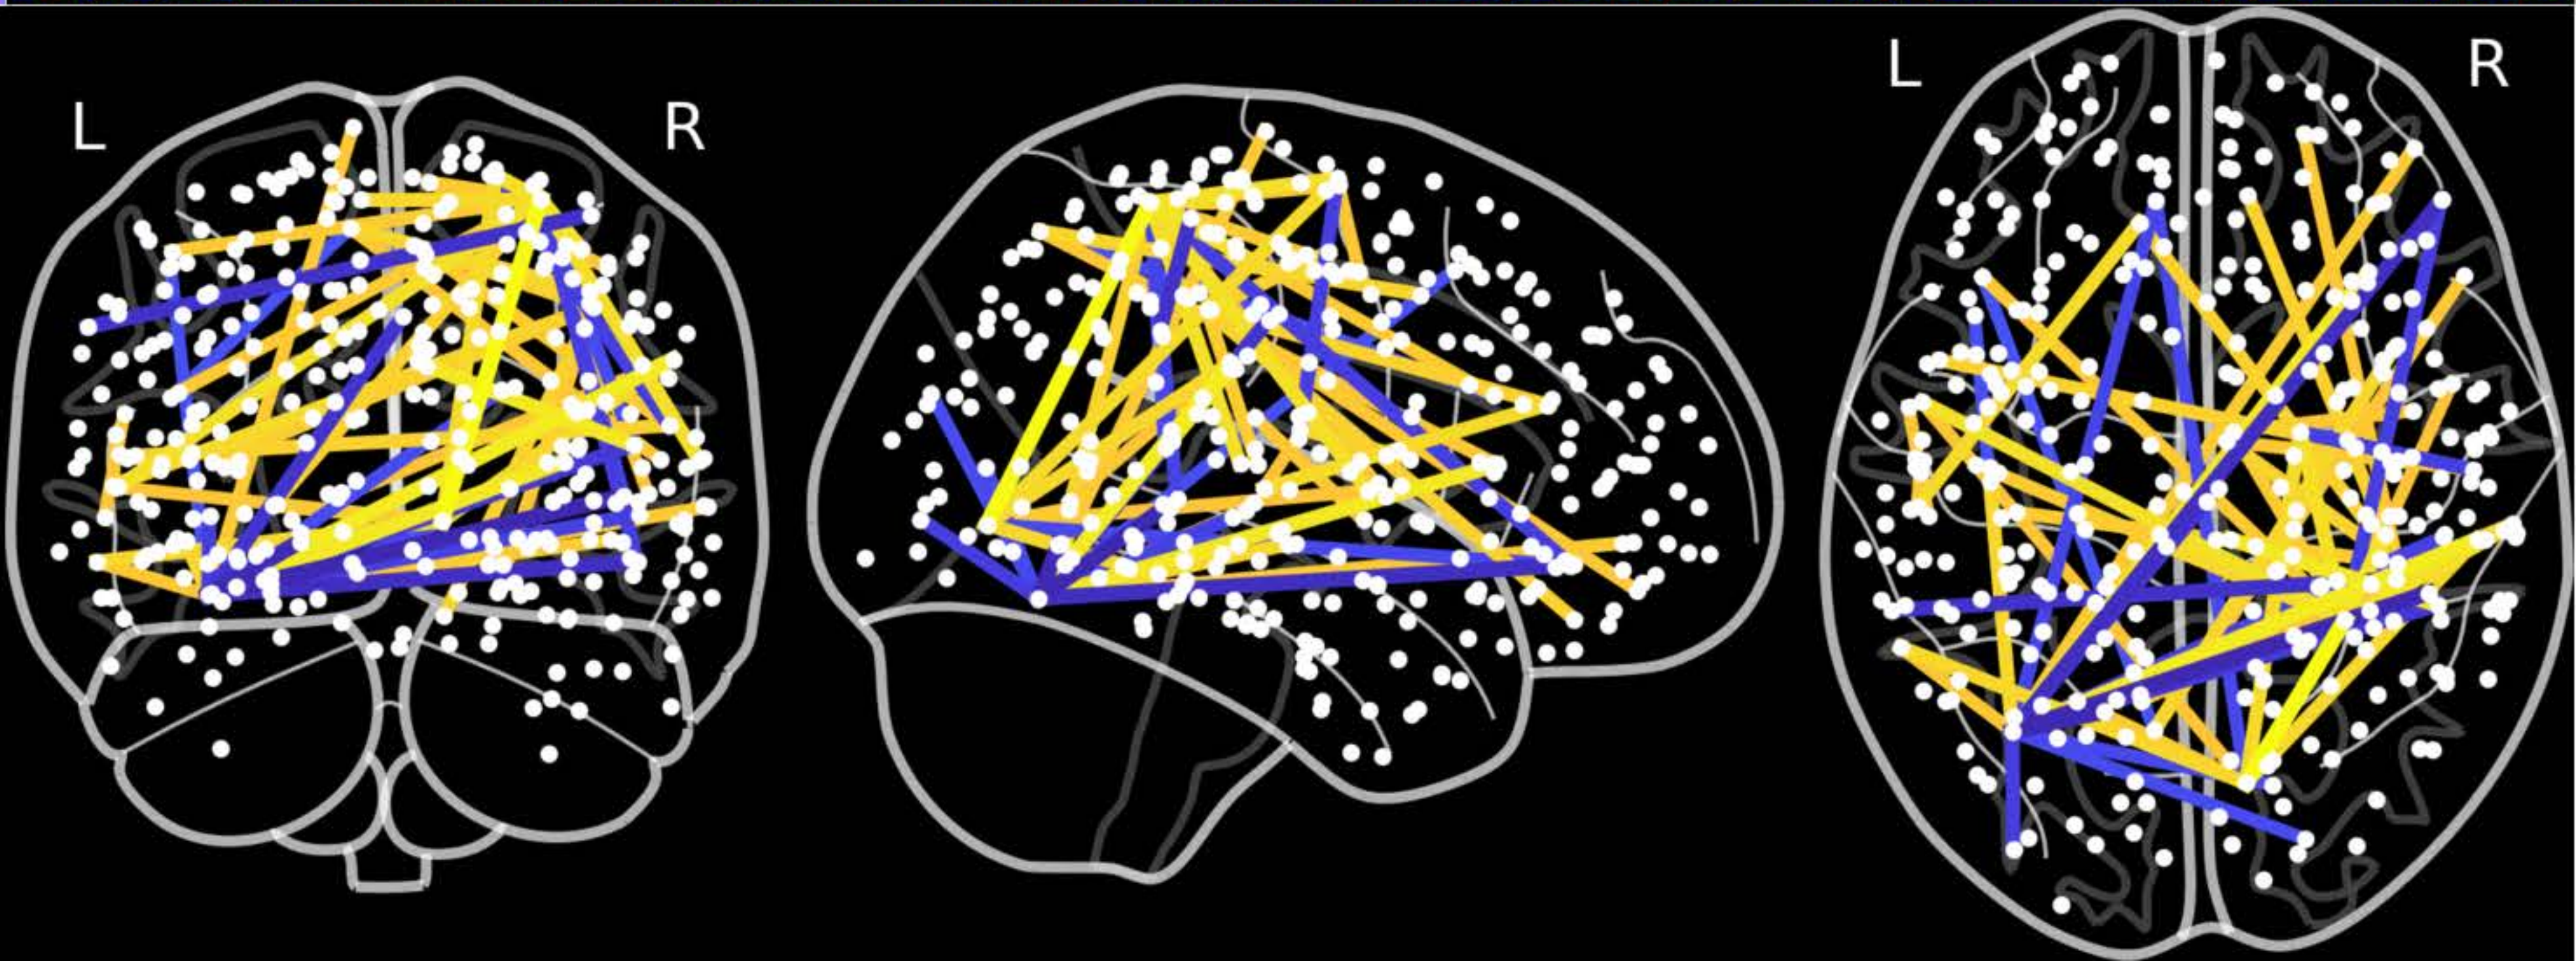



component\_8

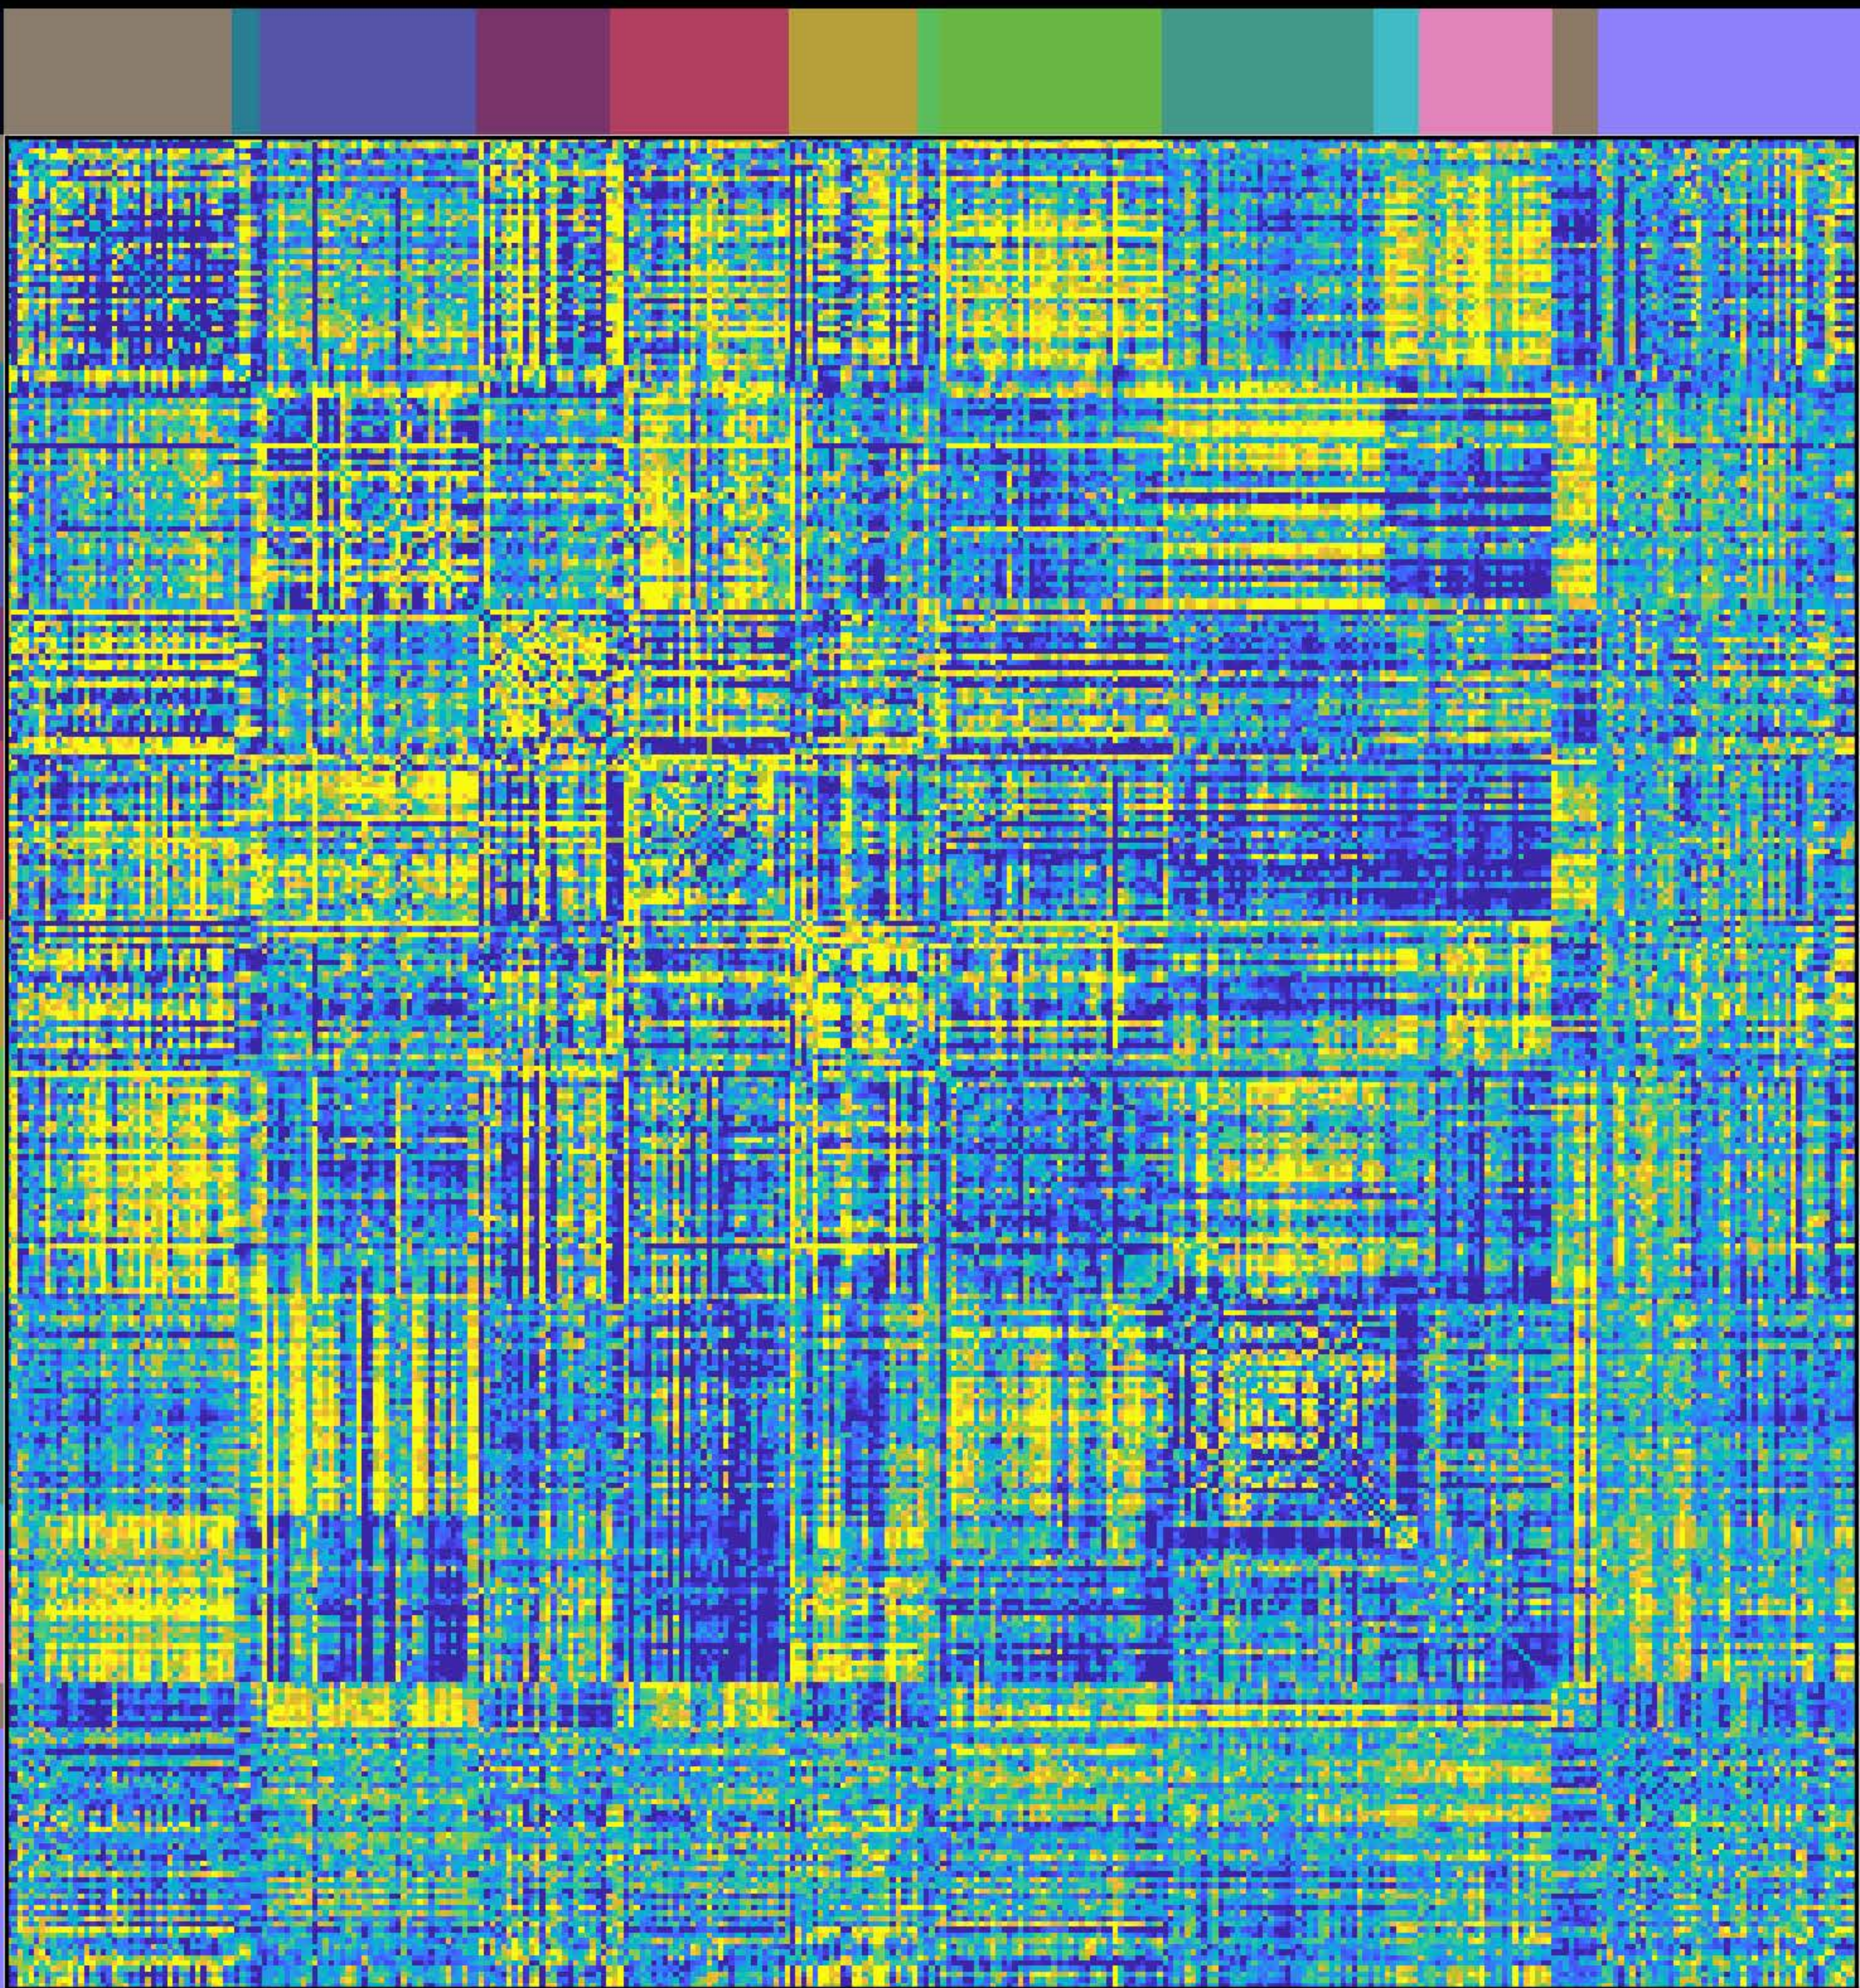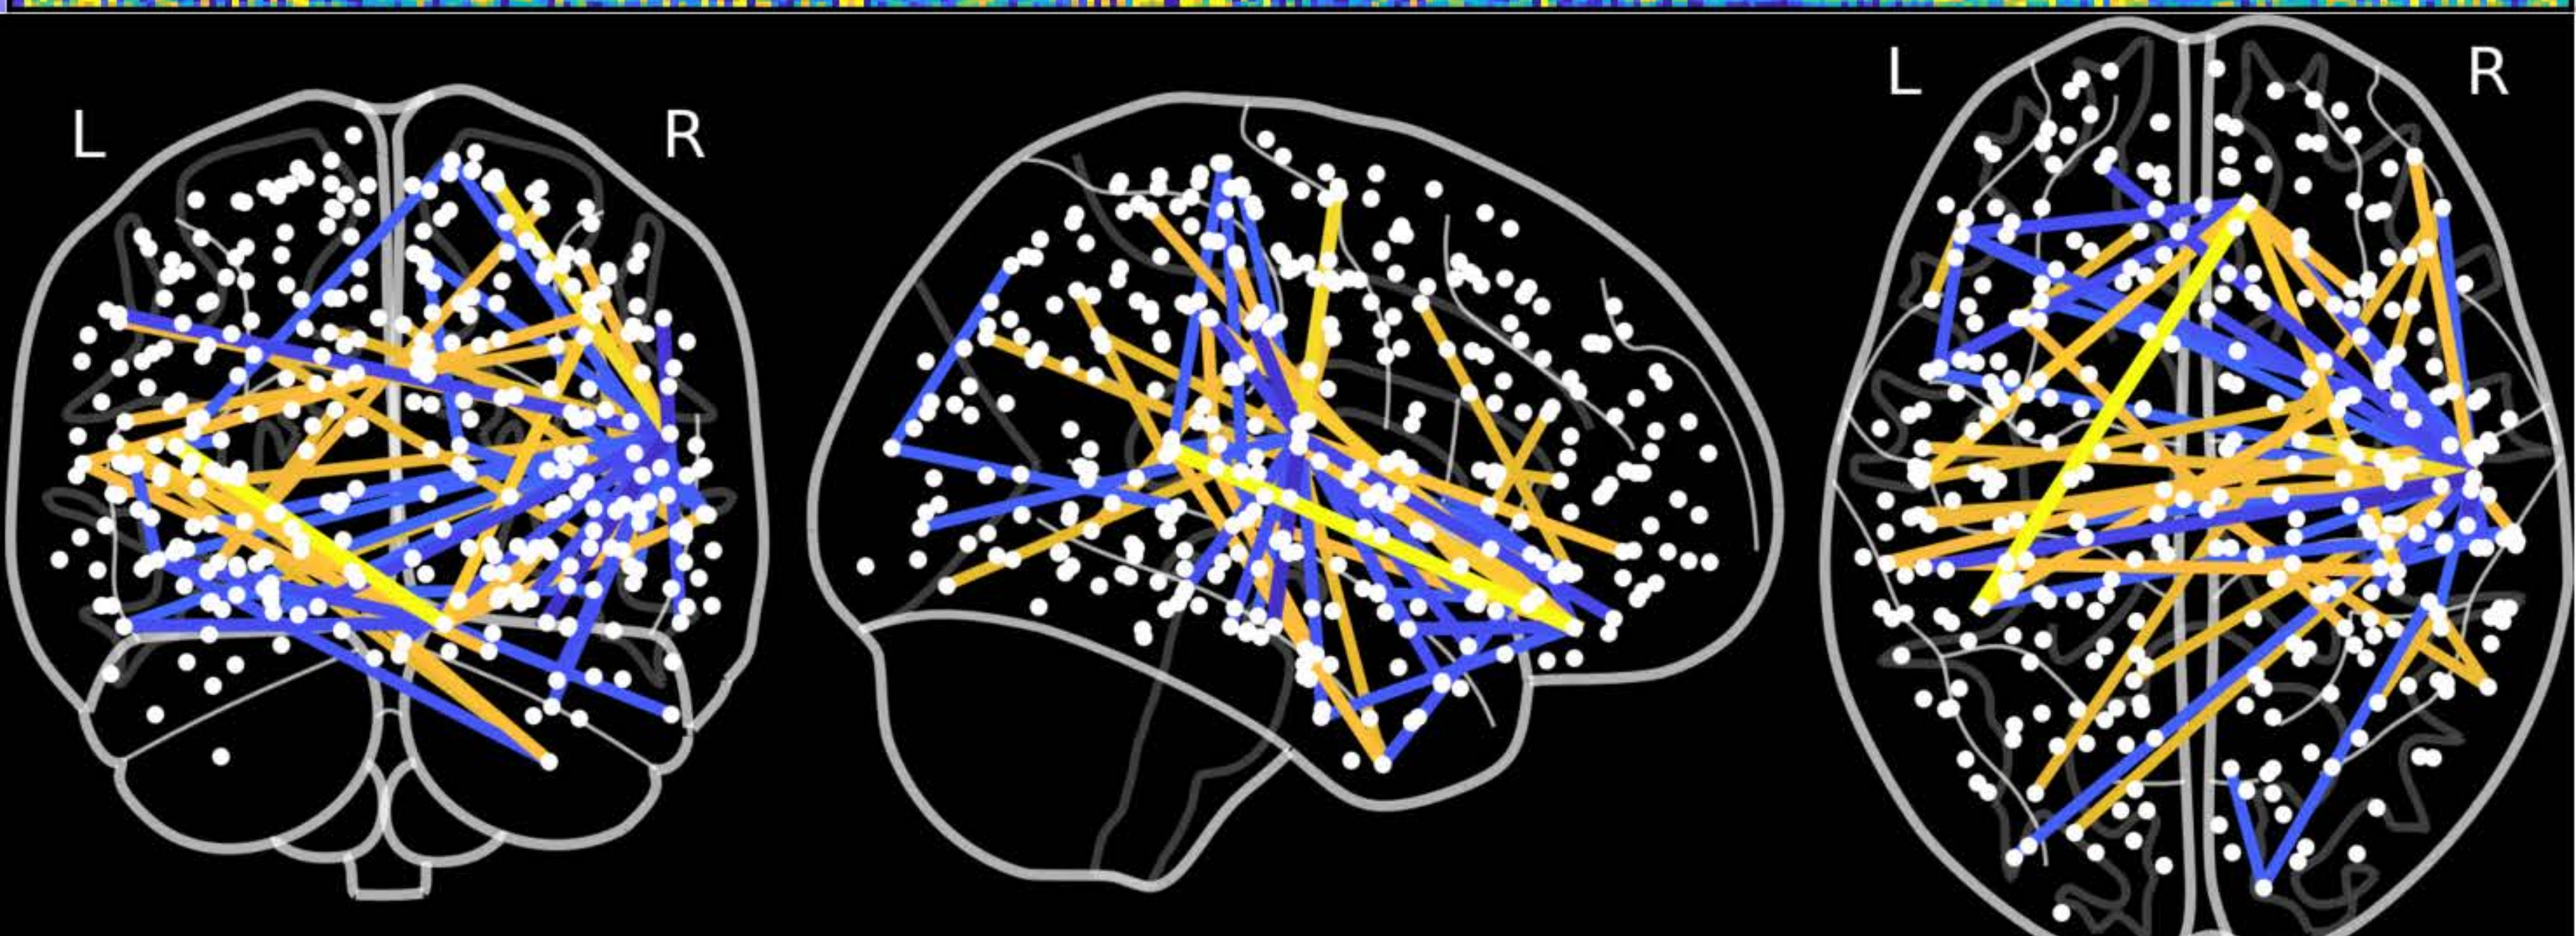



component\_9

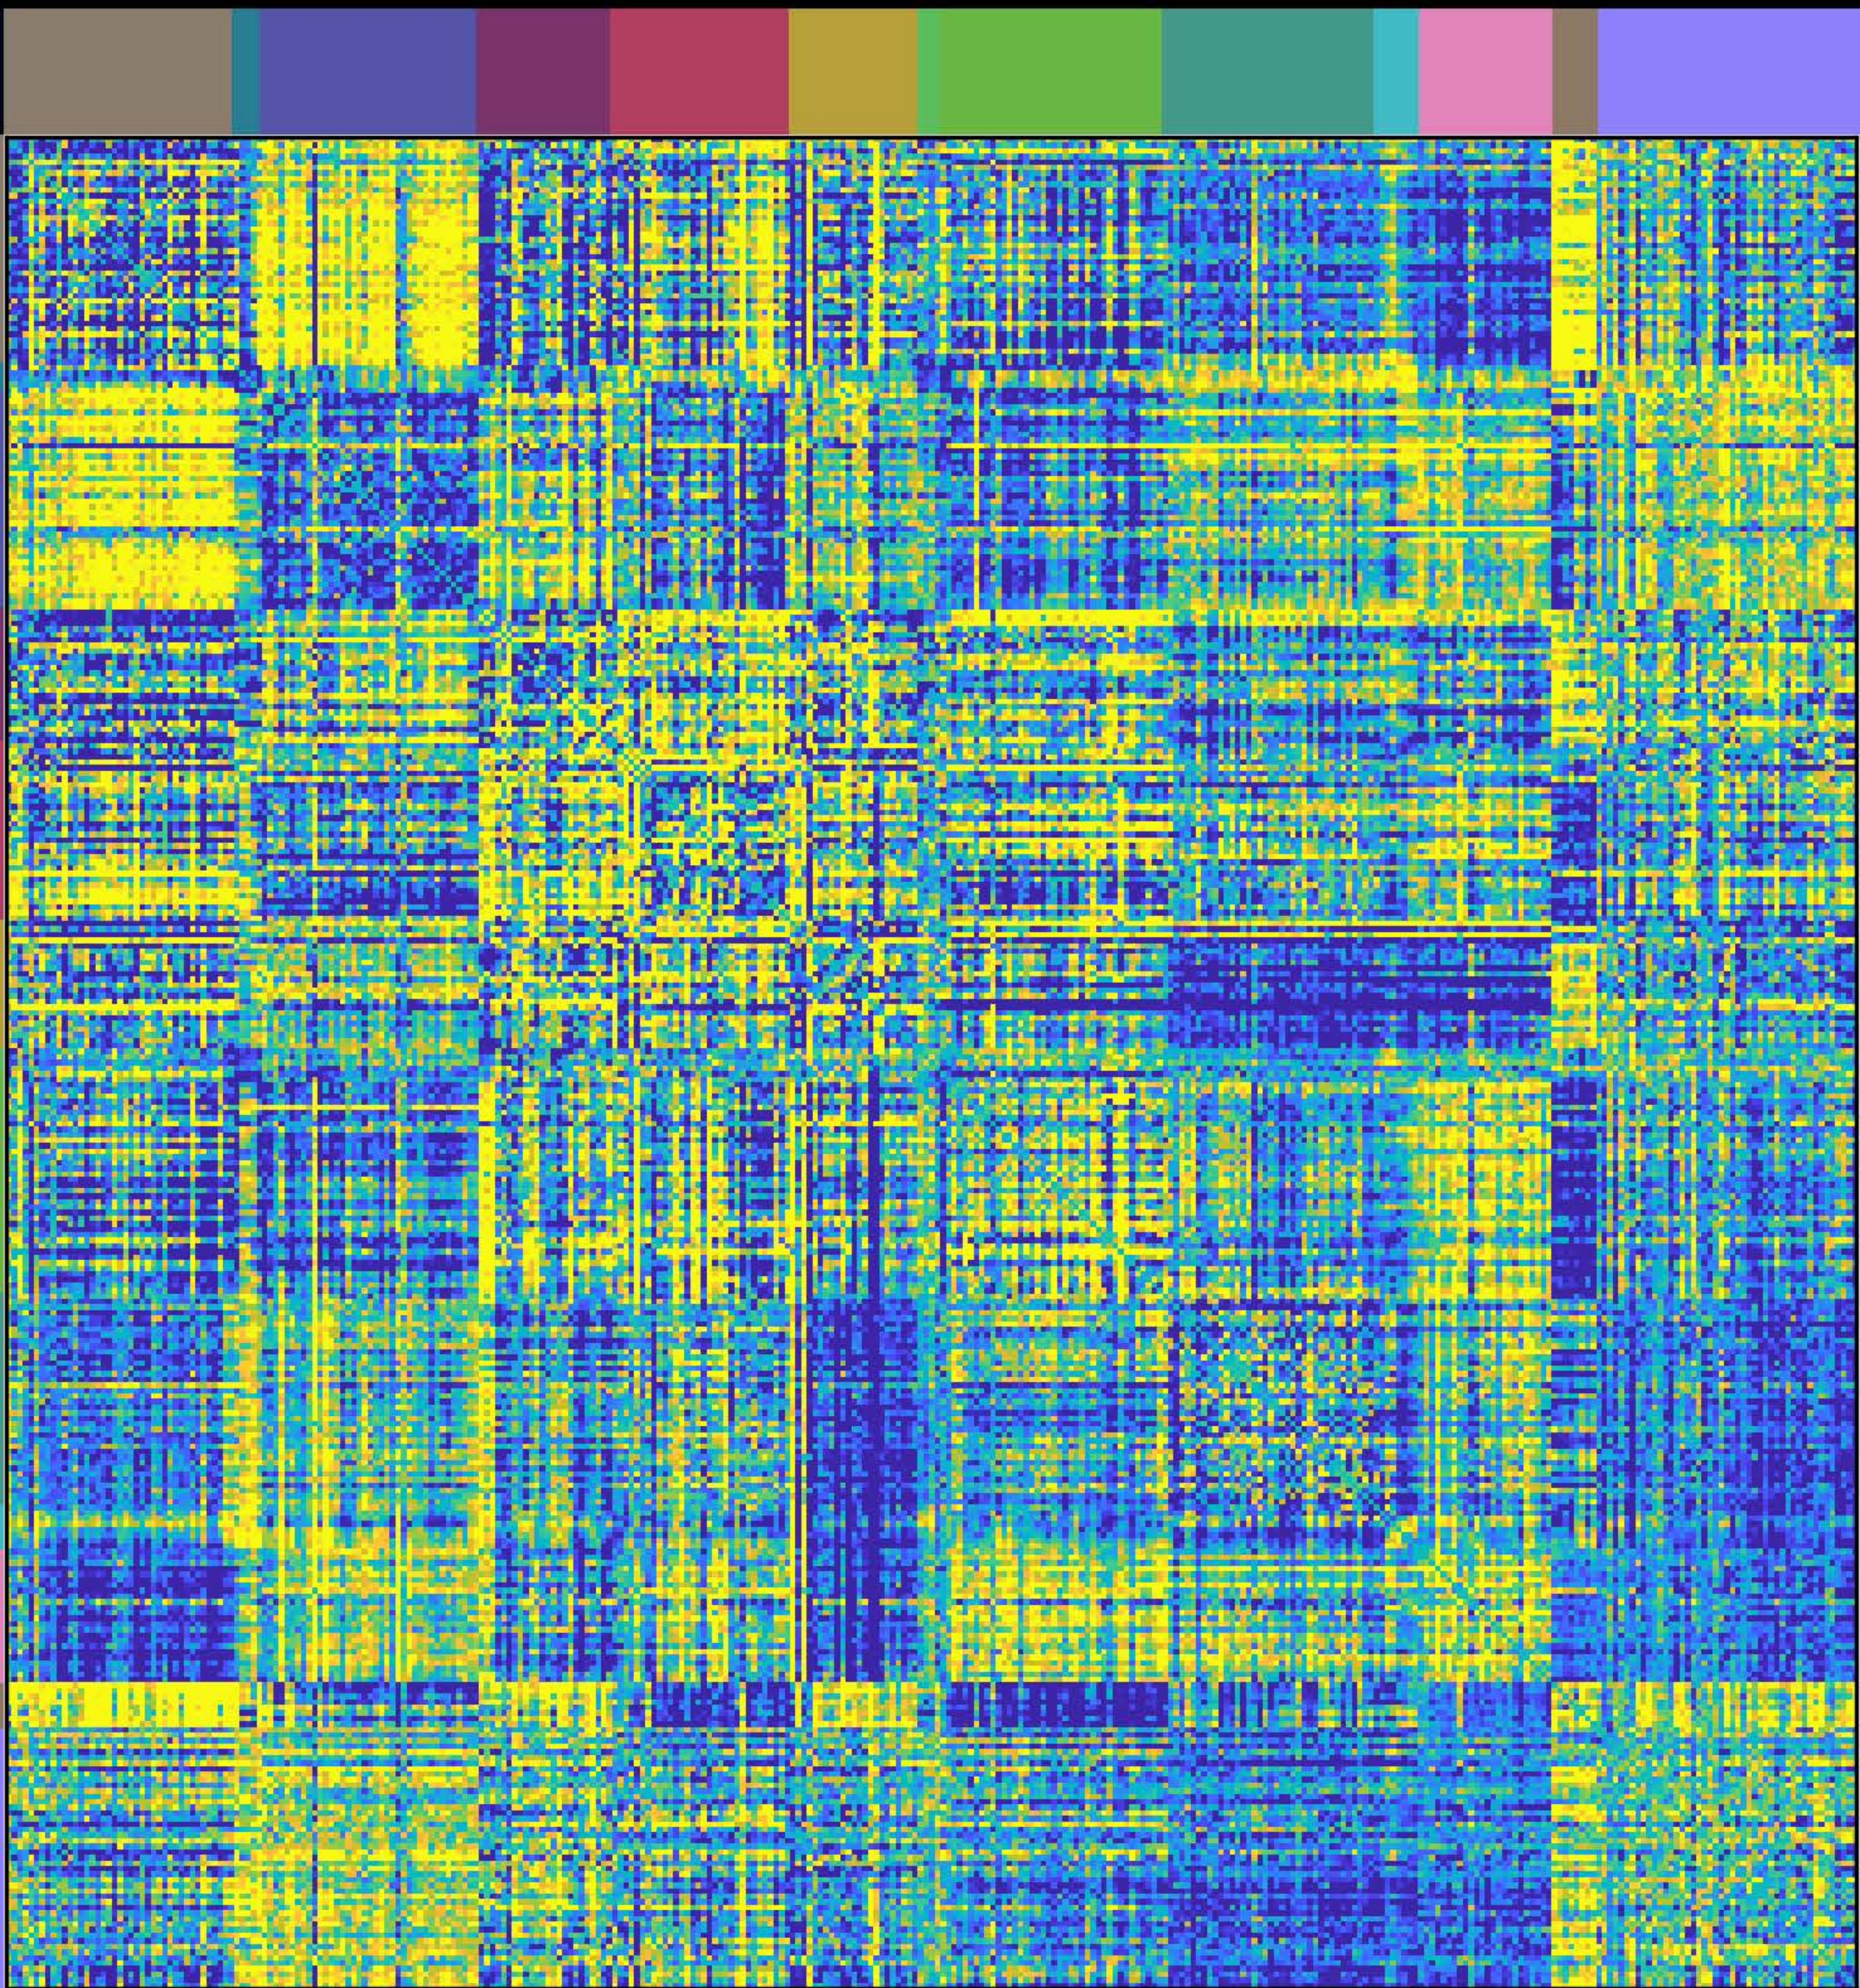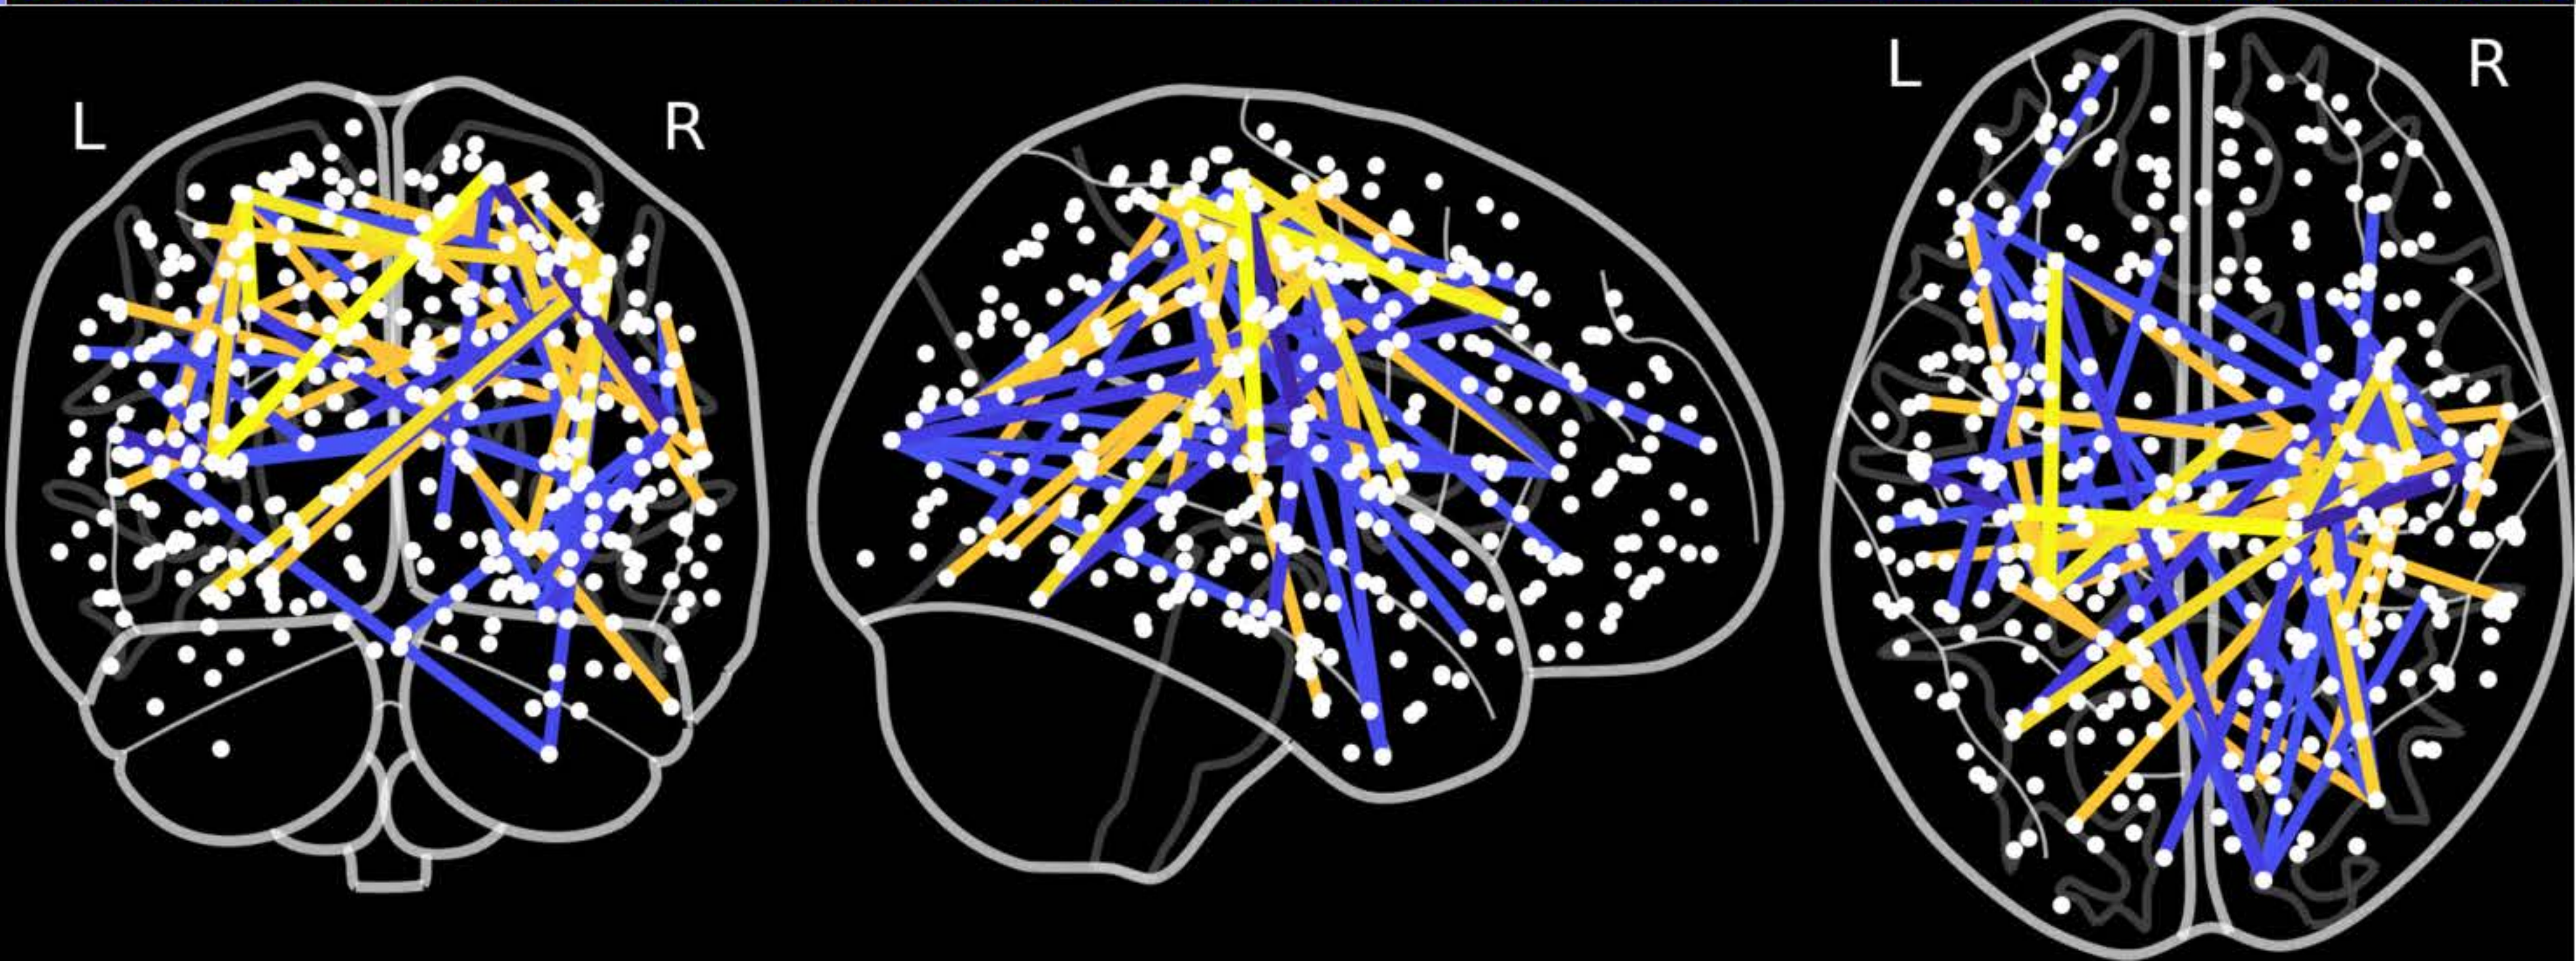



# component\_10

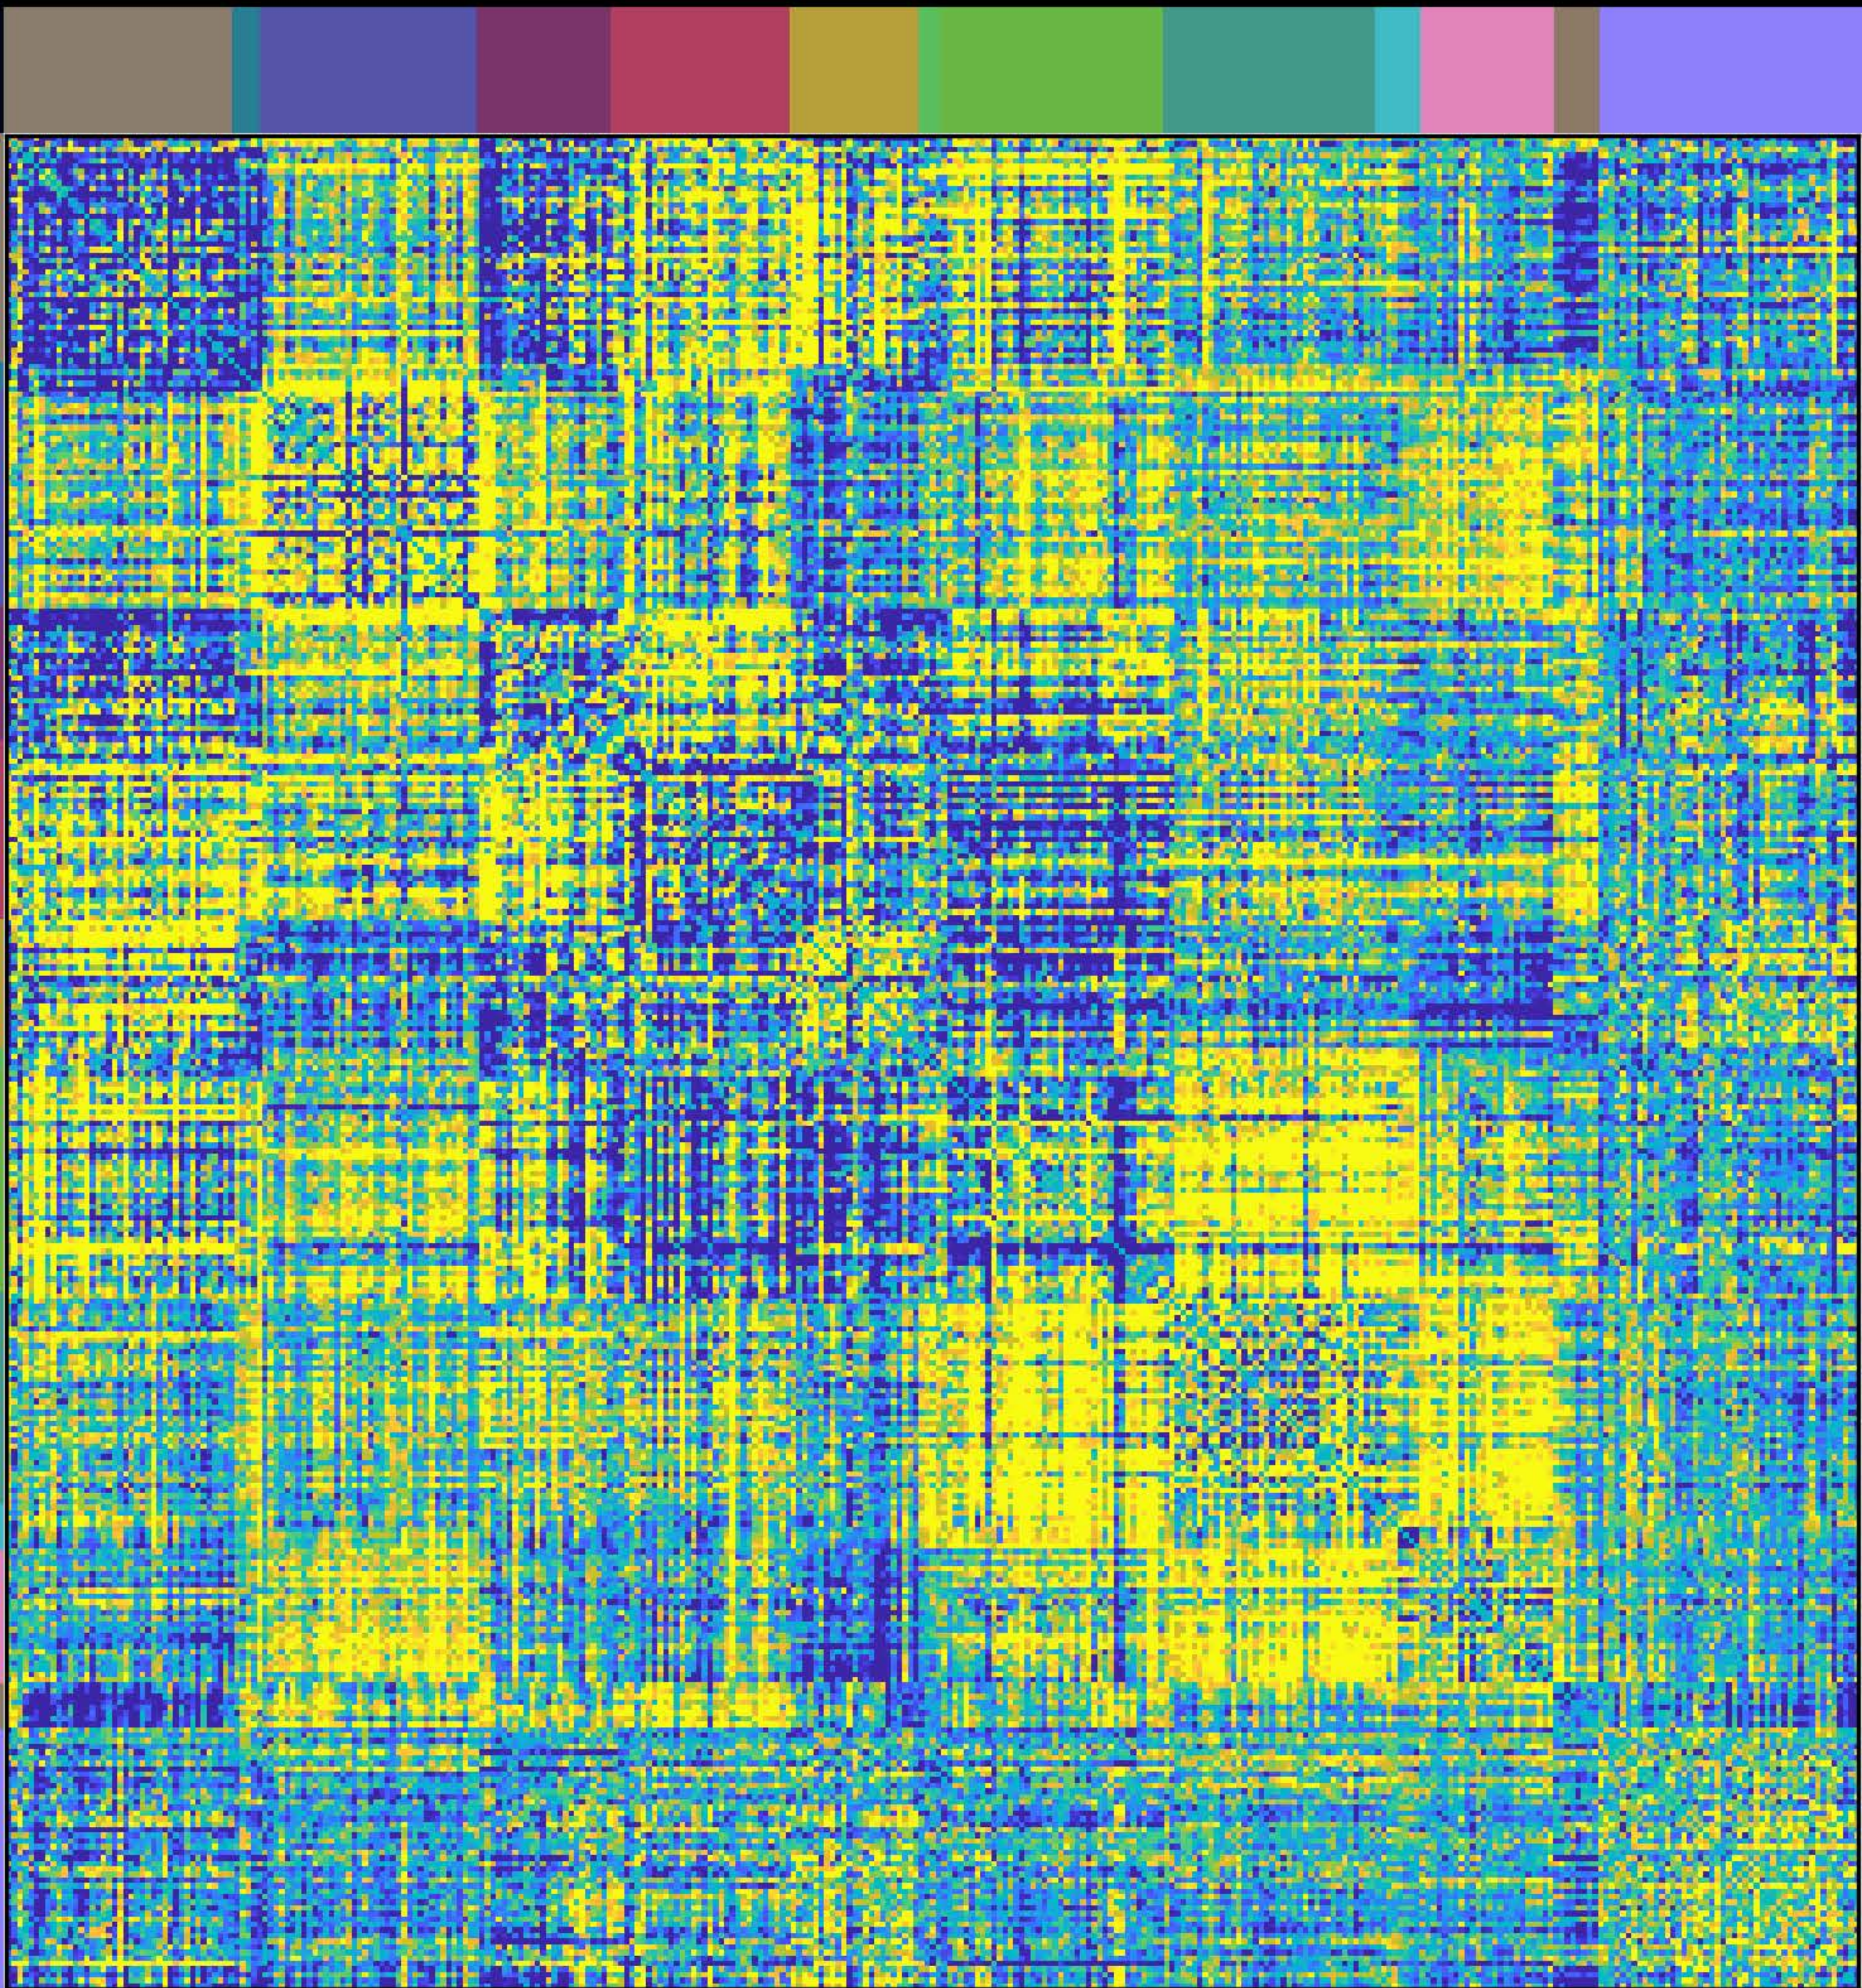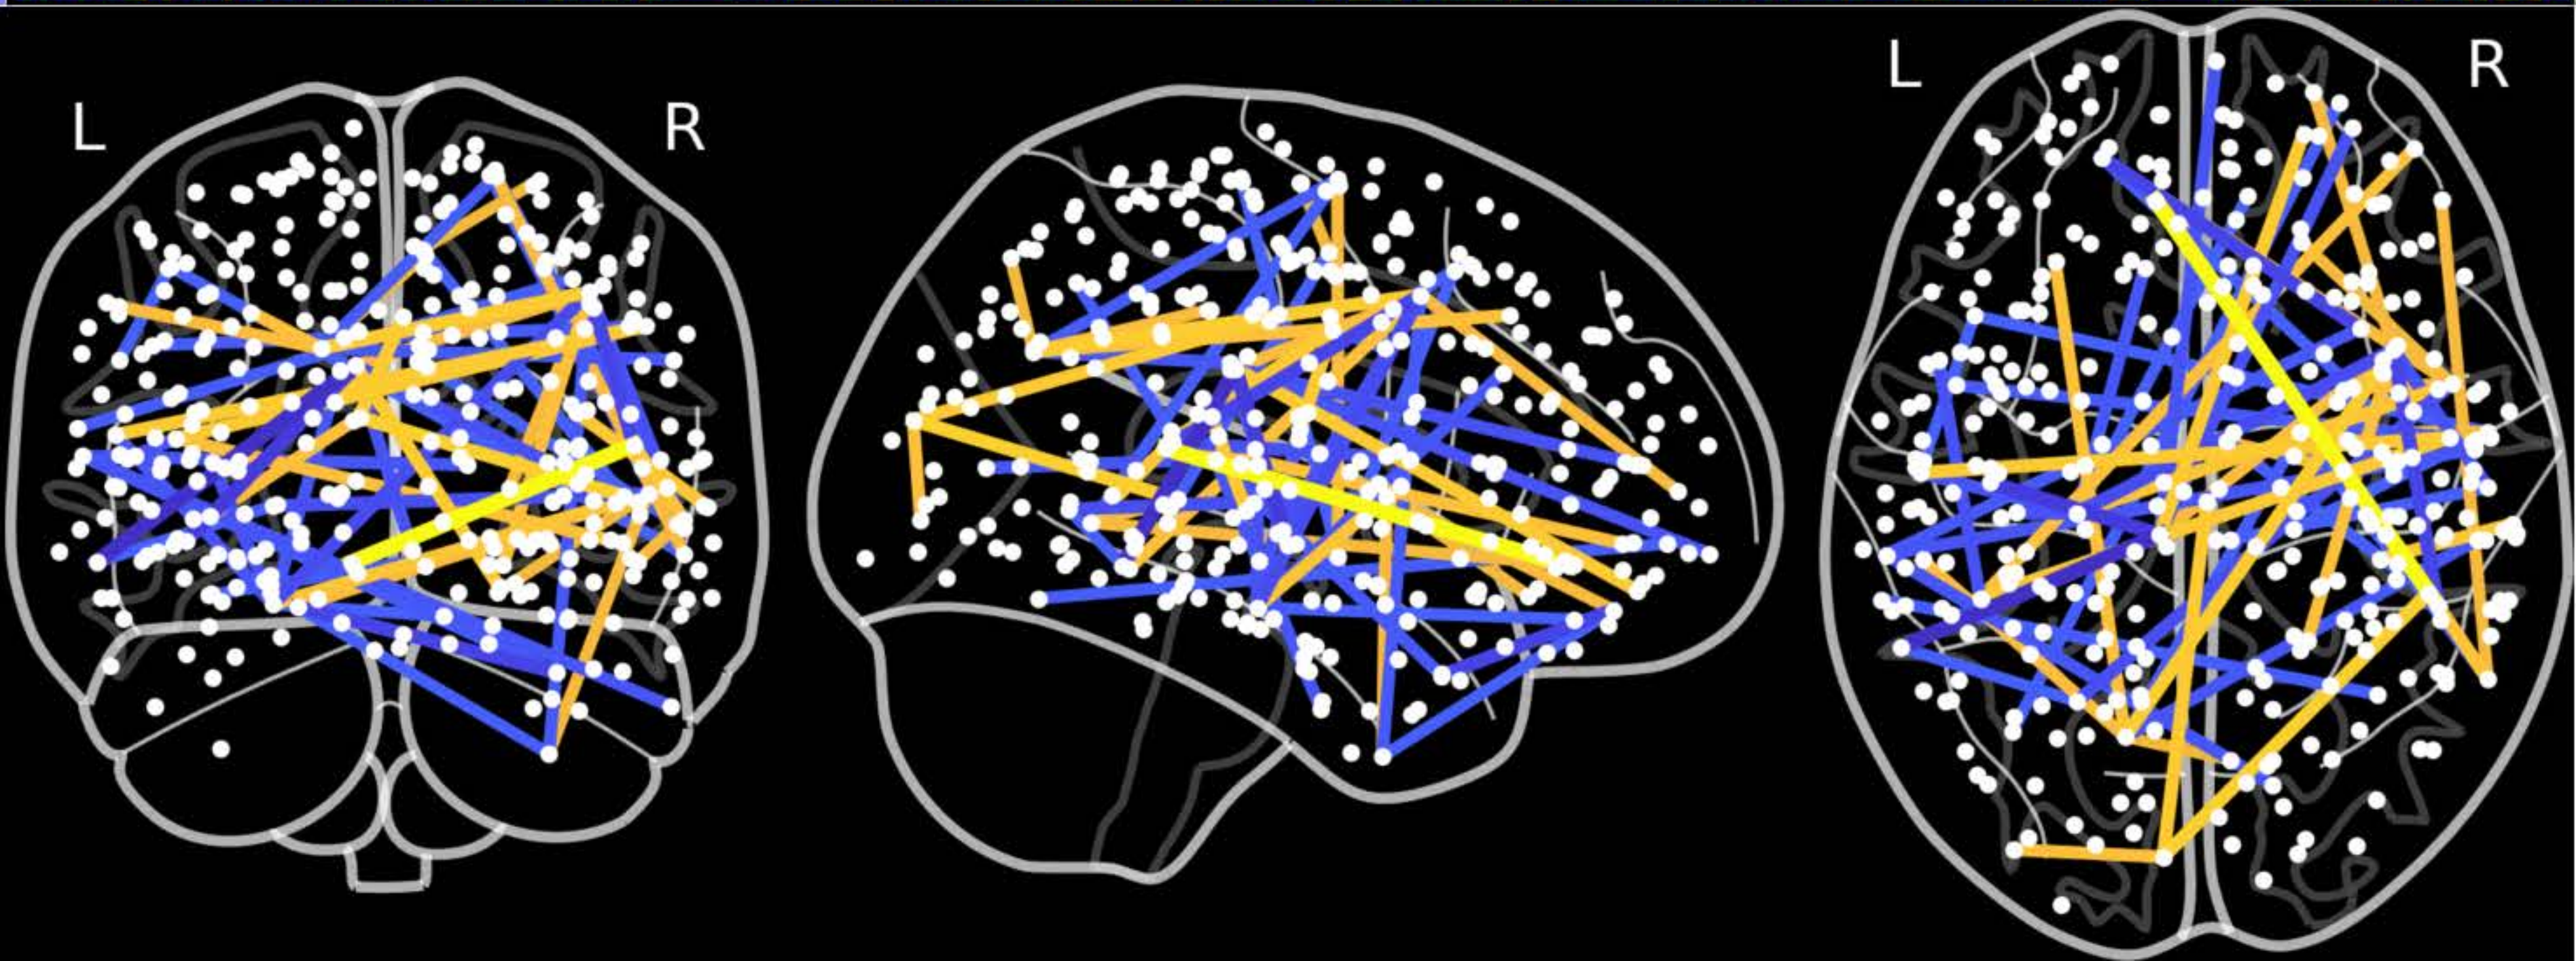



component\_11

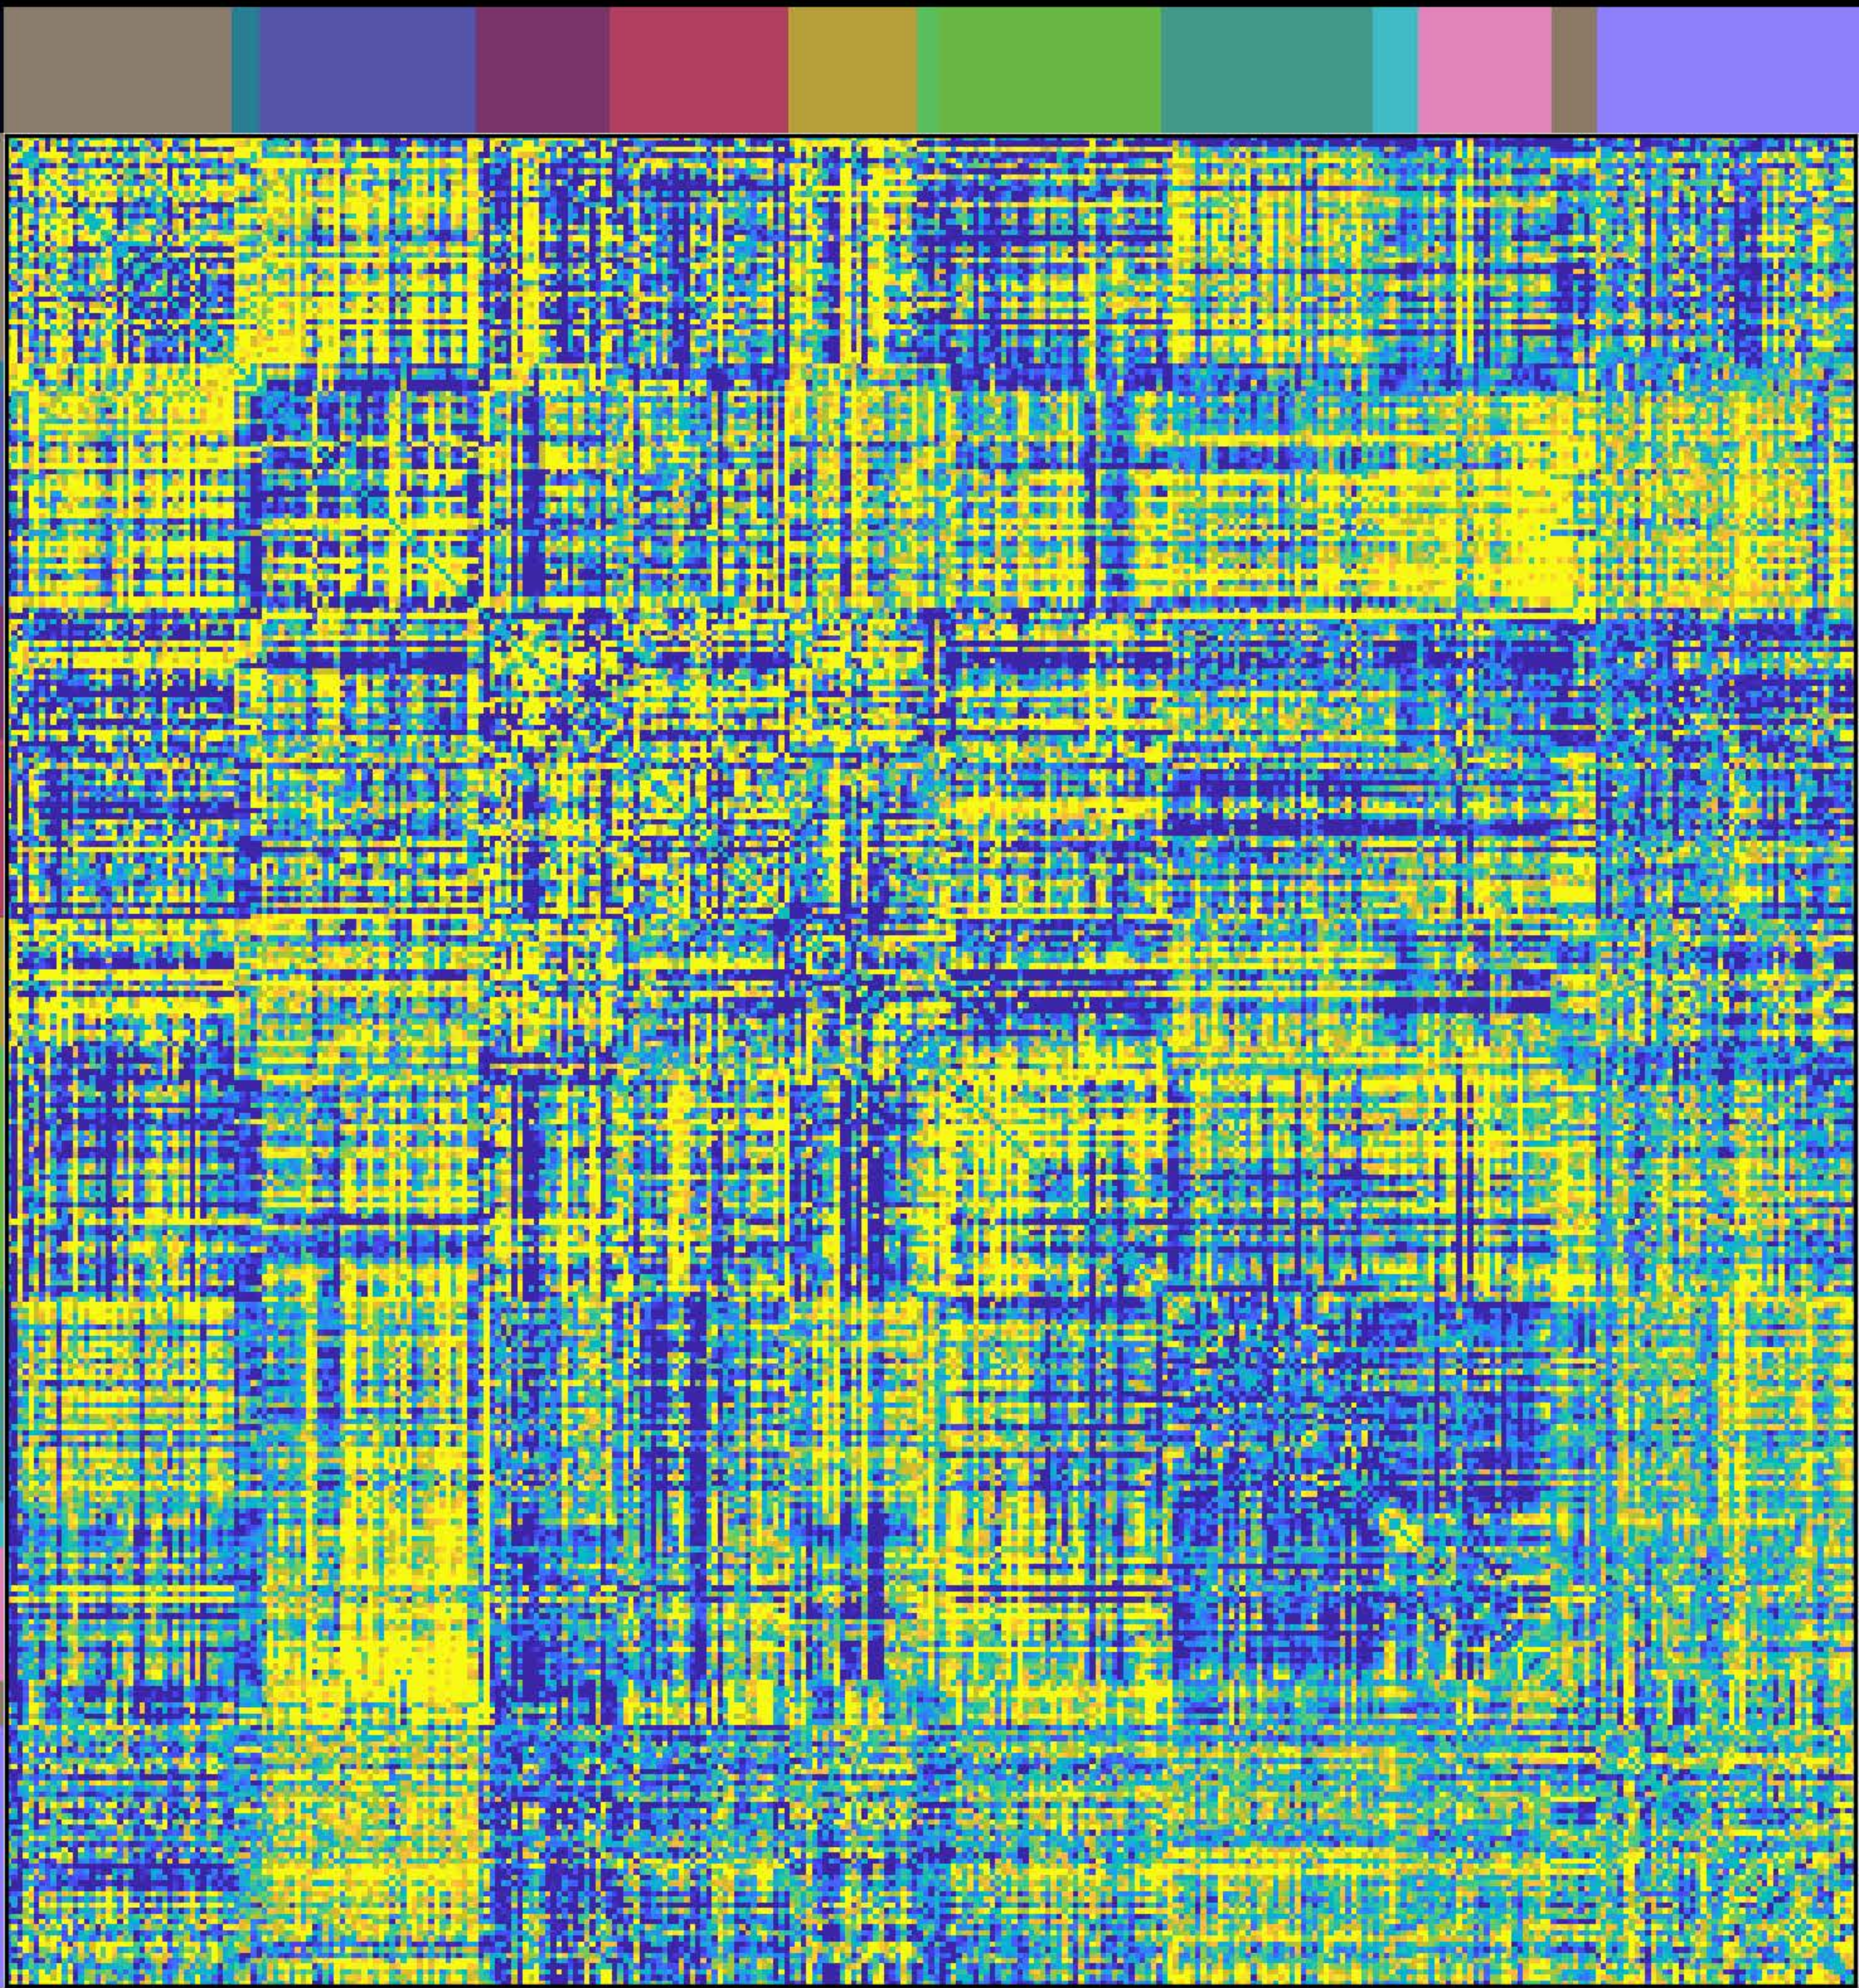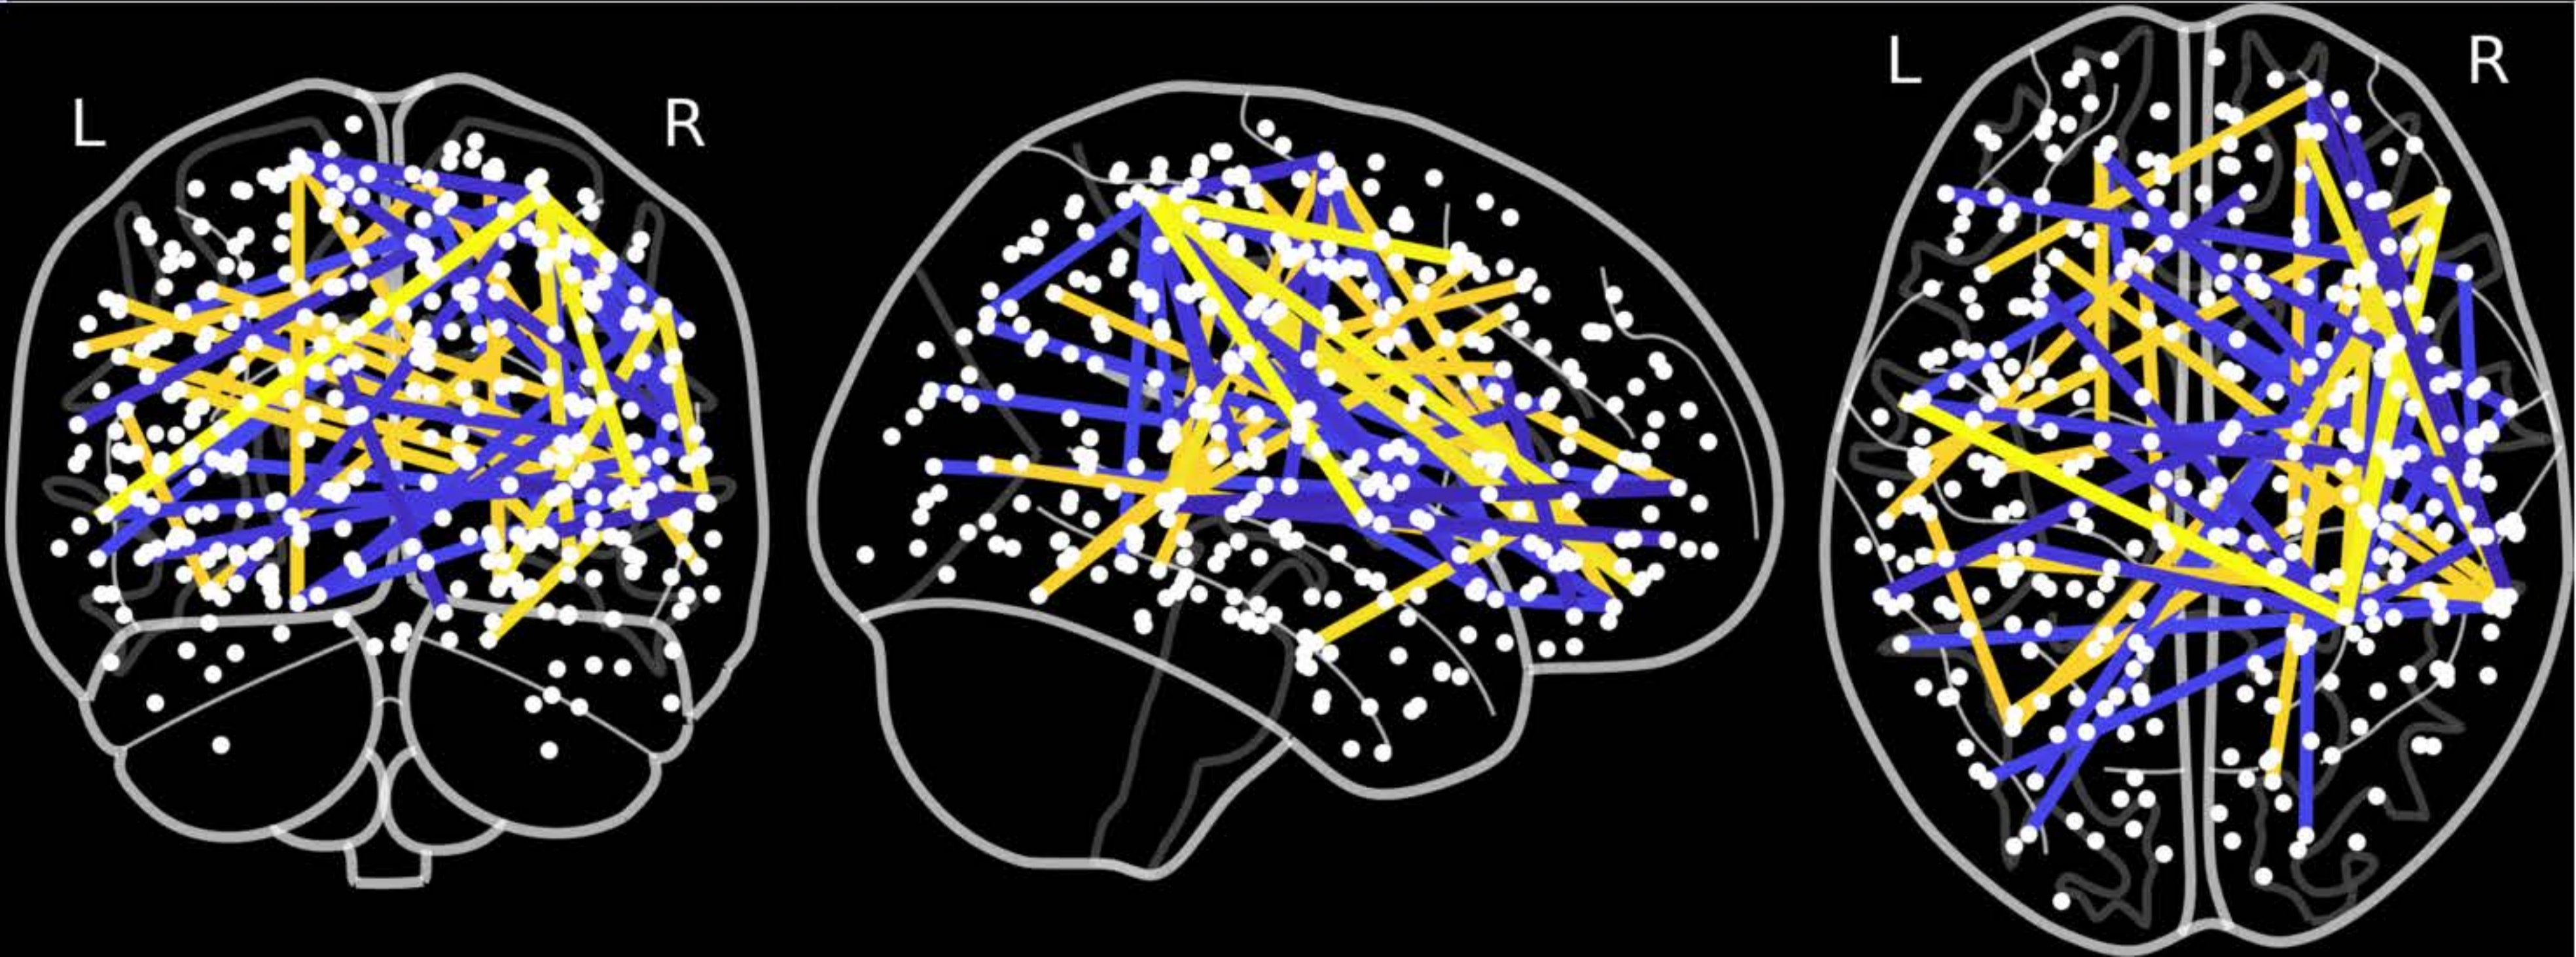



component\_12

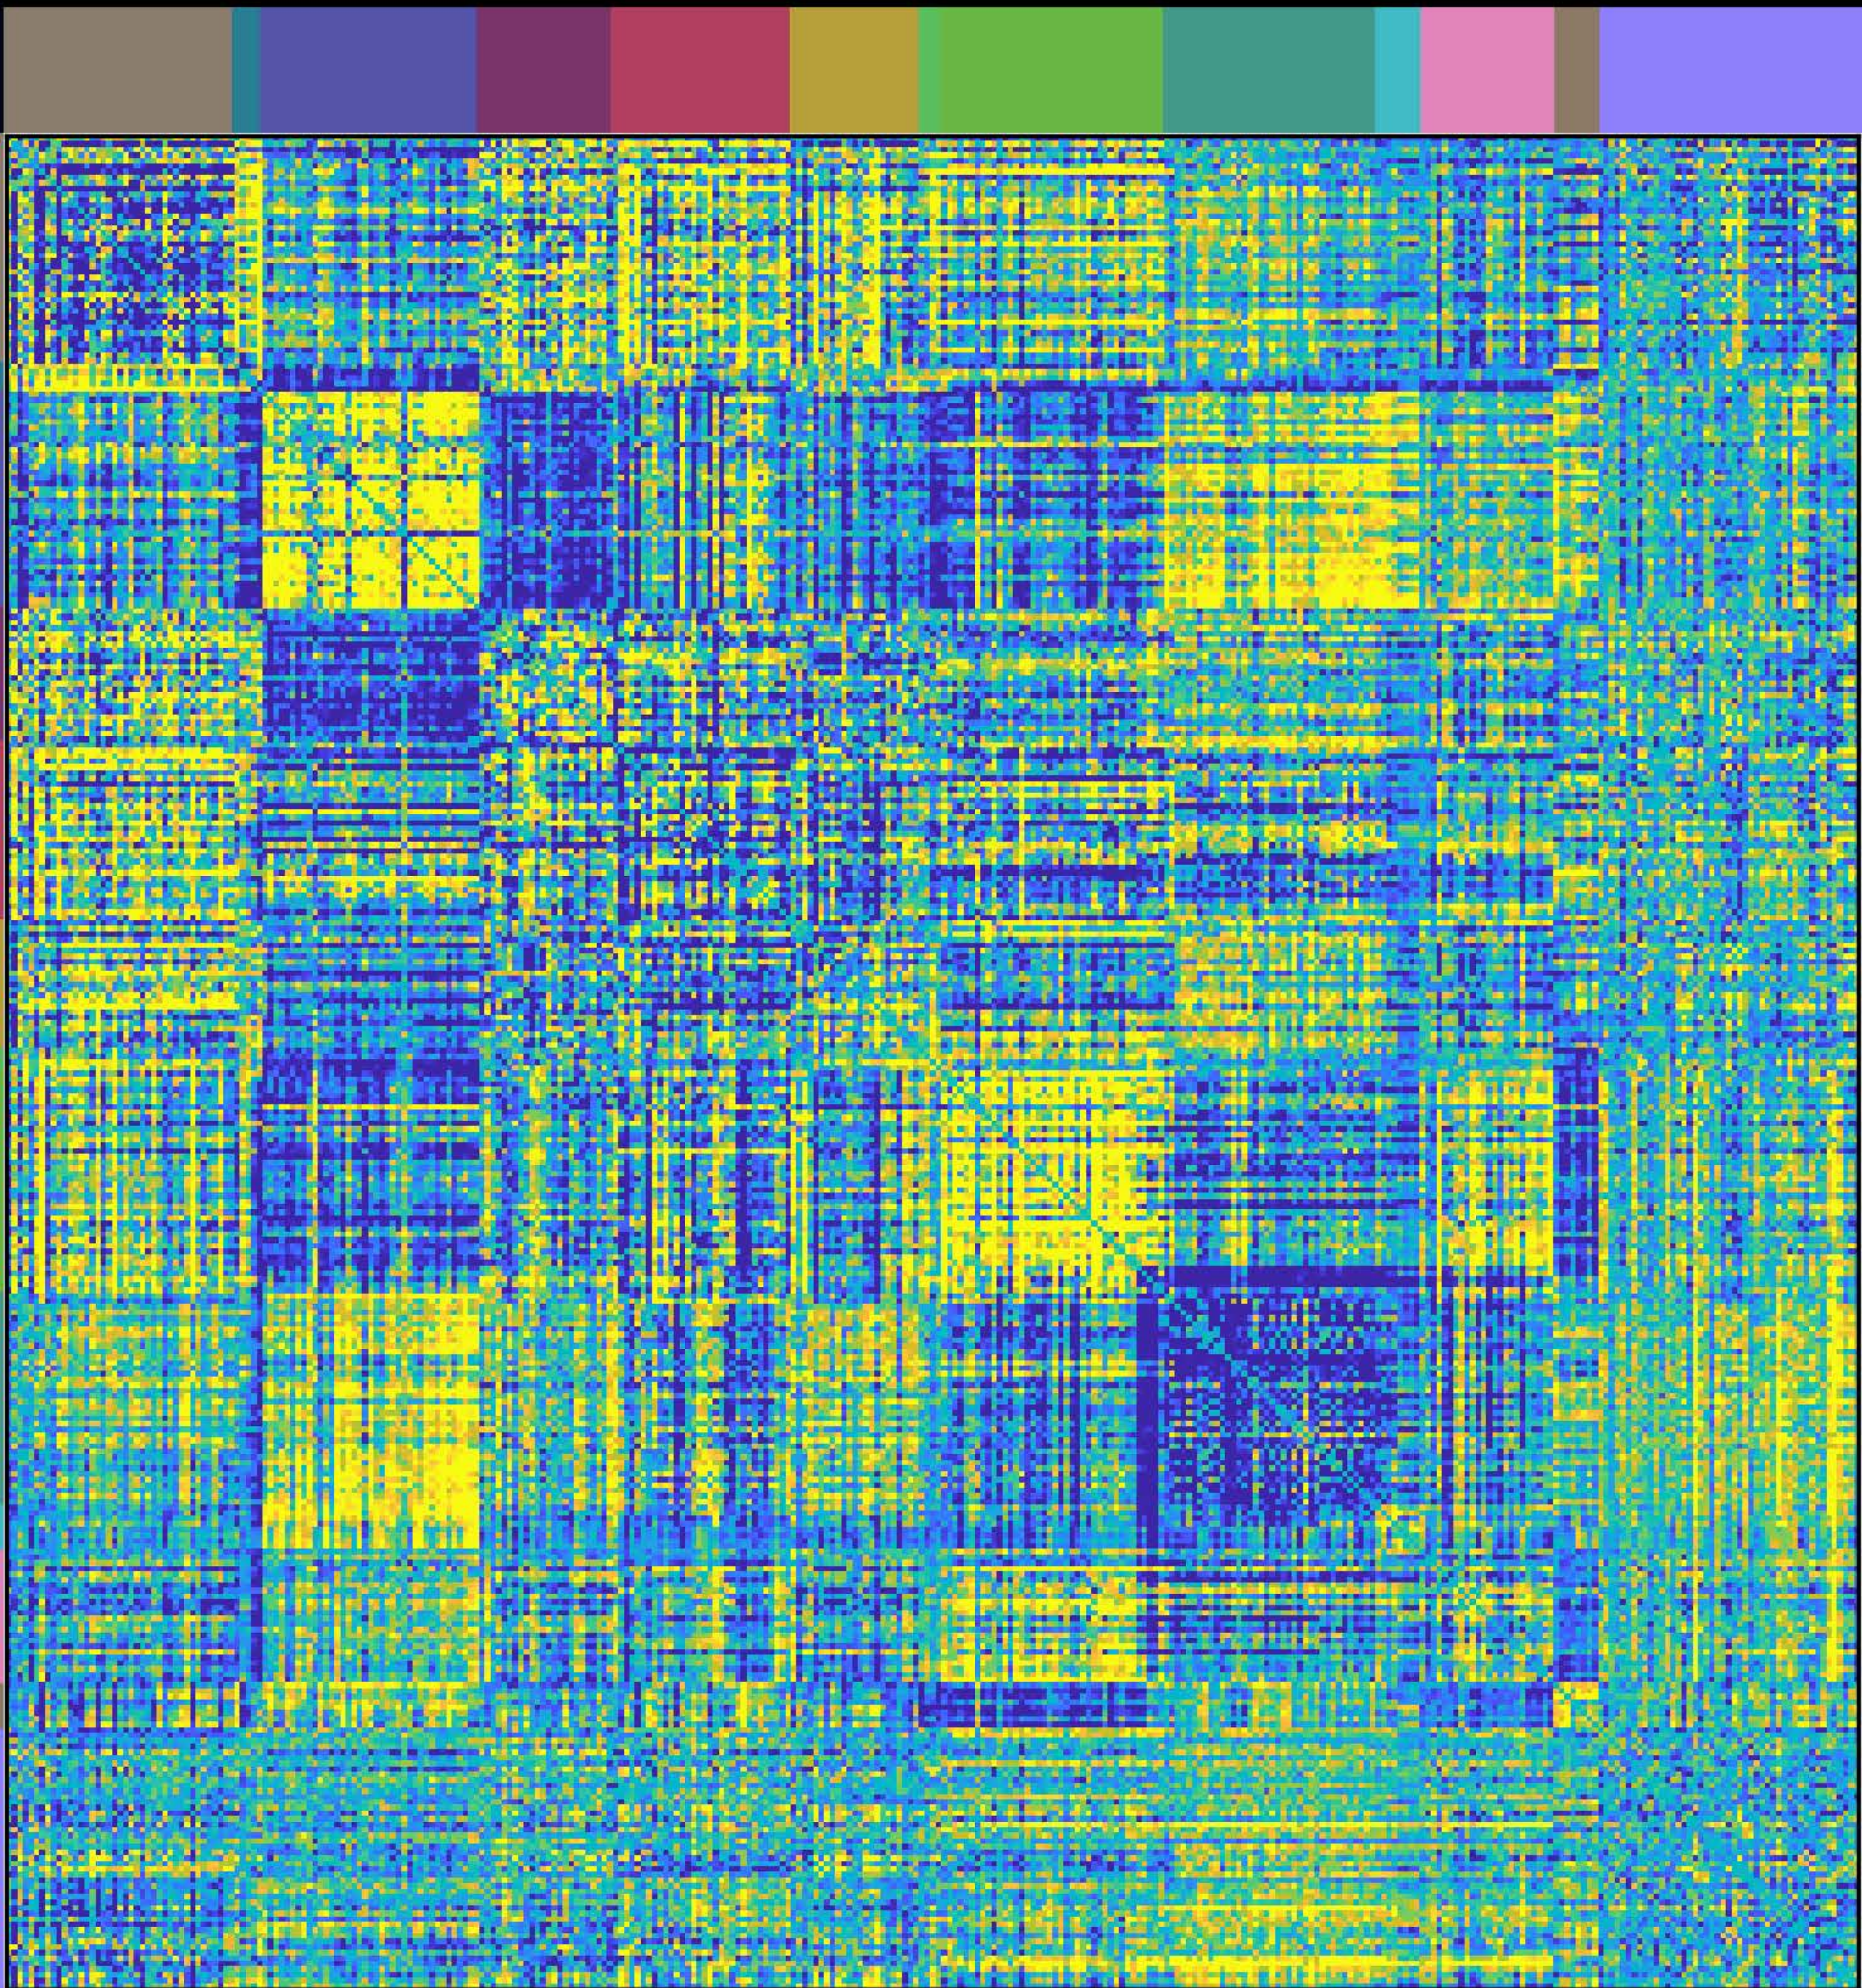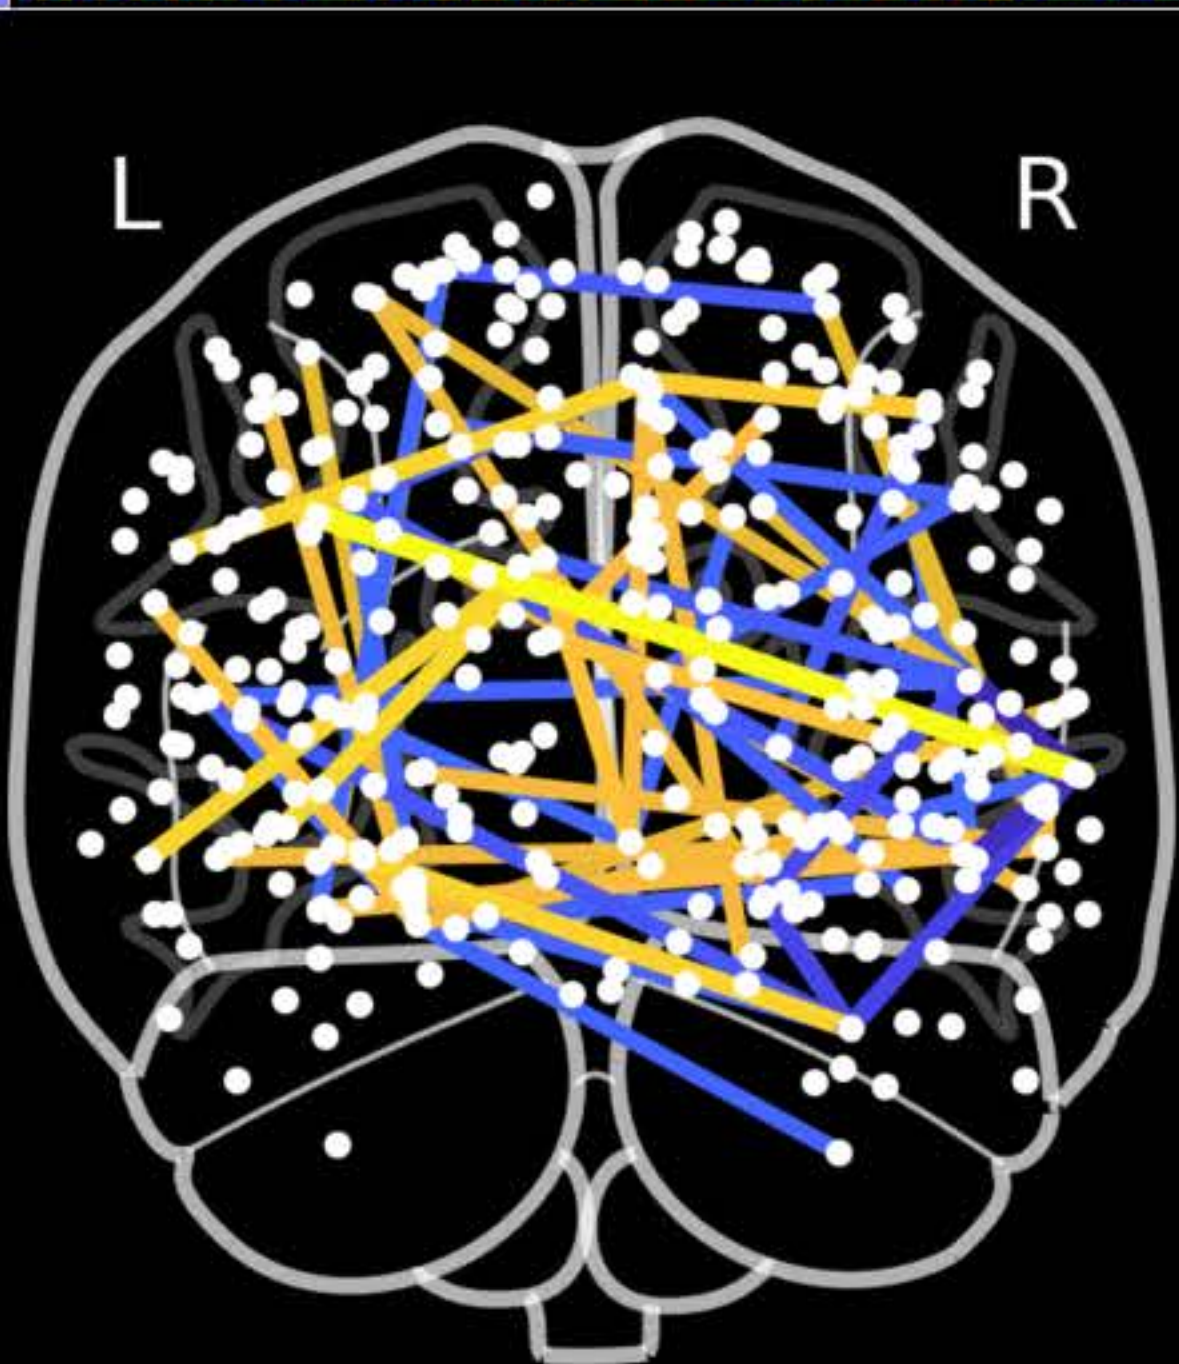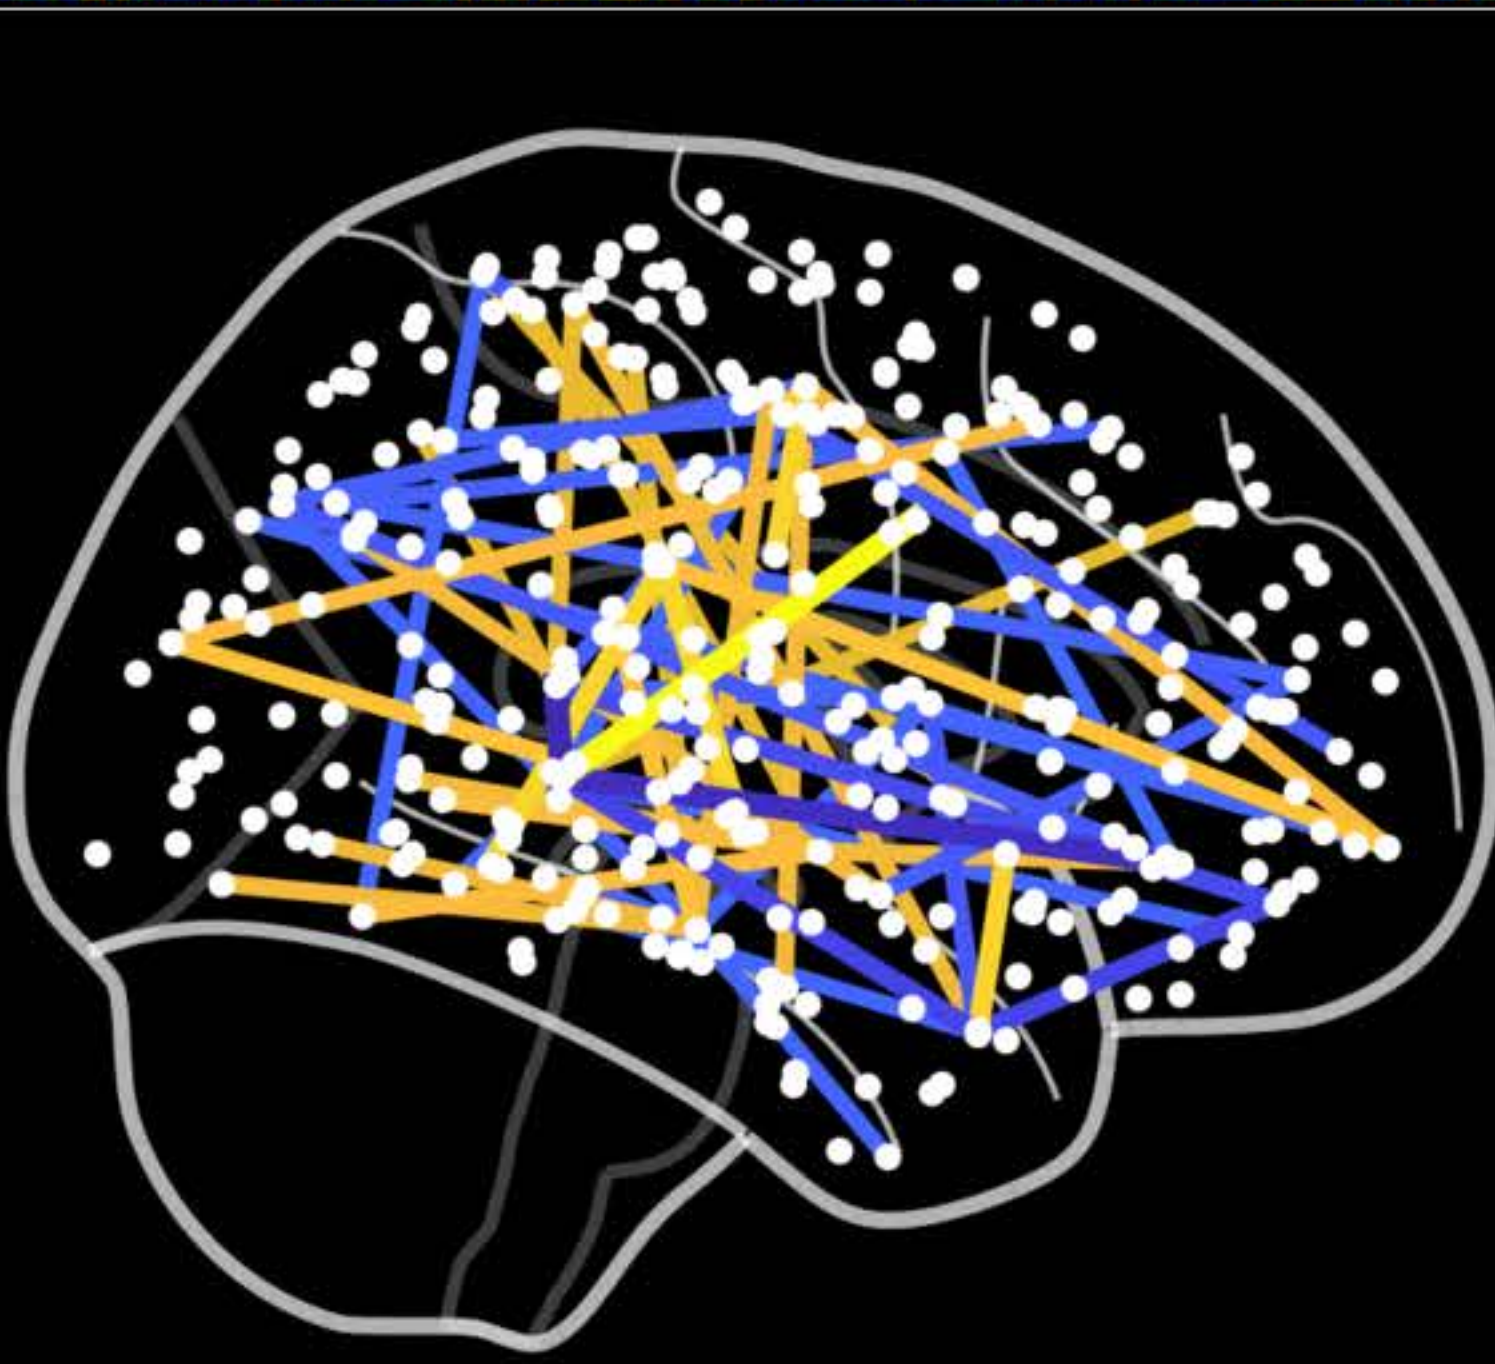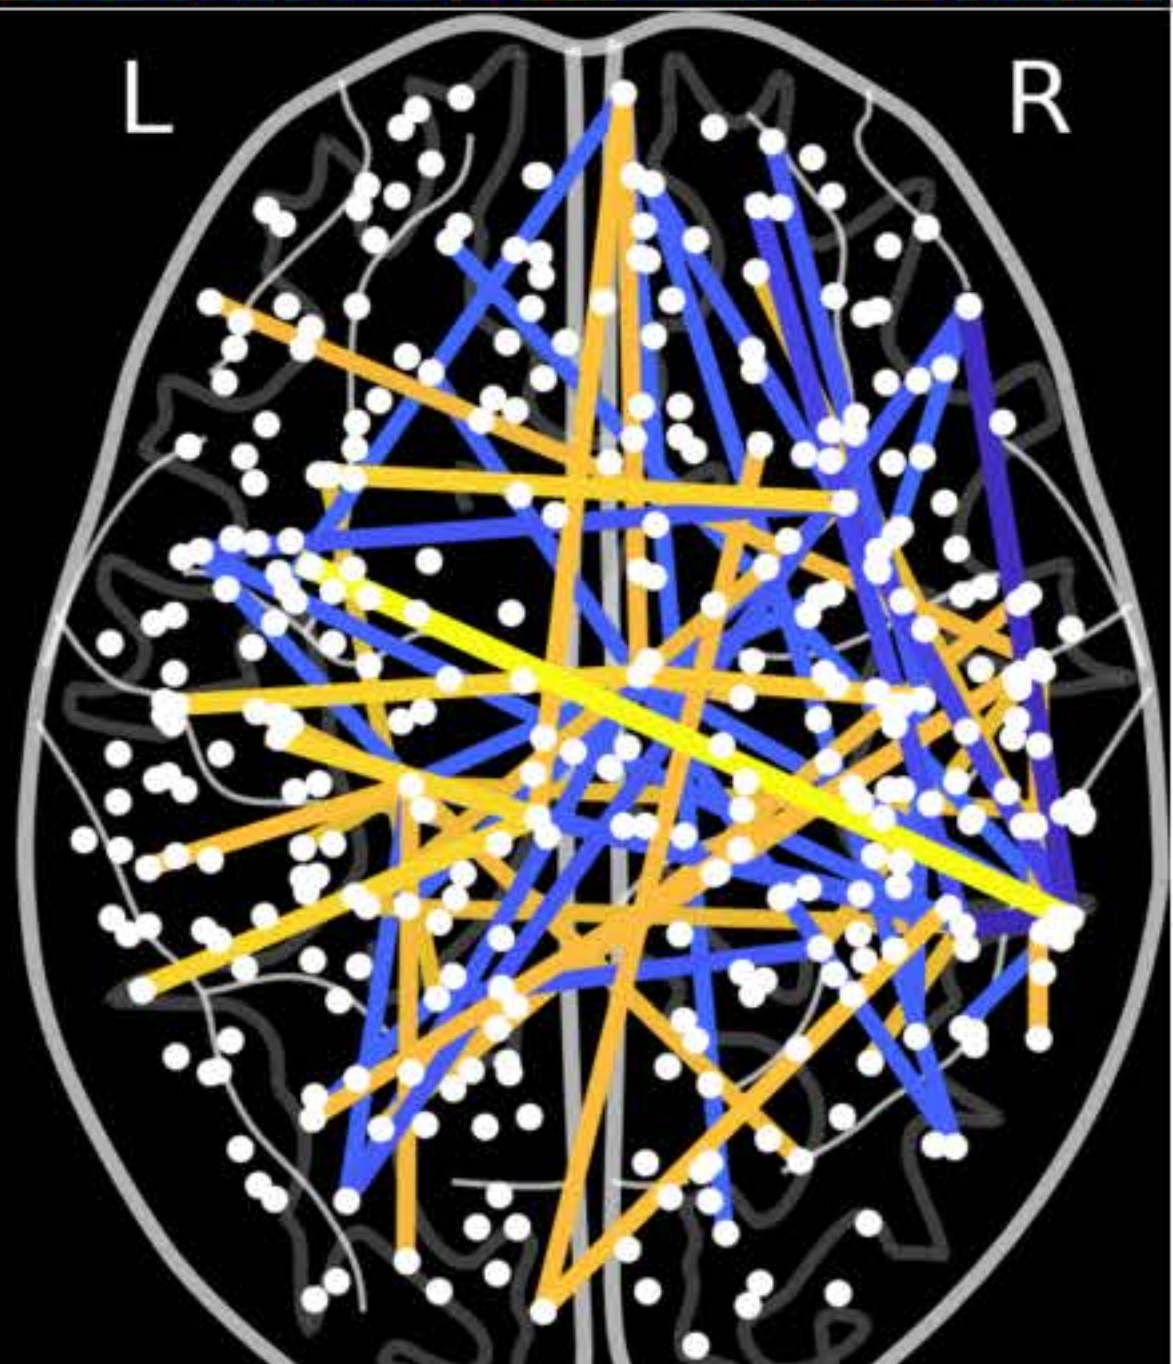



# component\_13

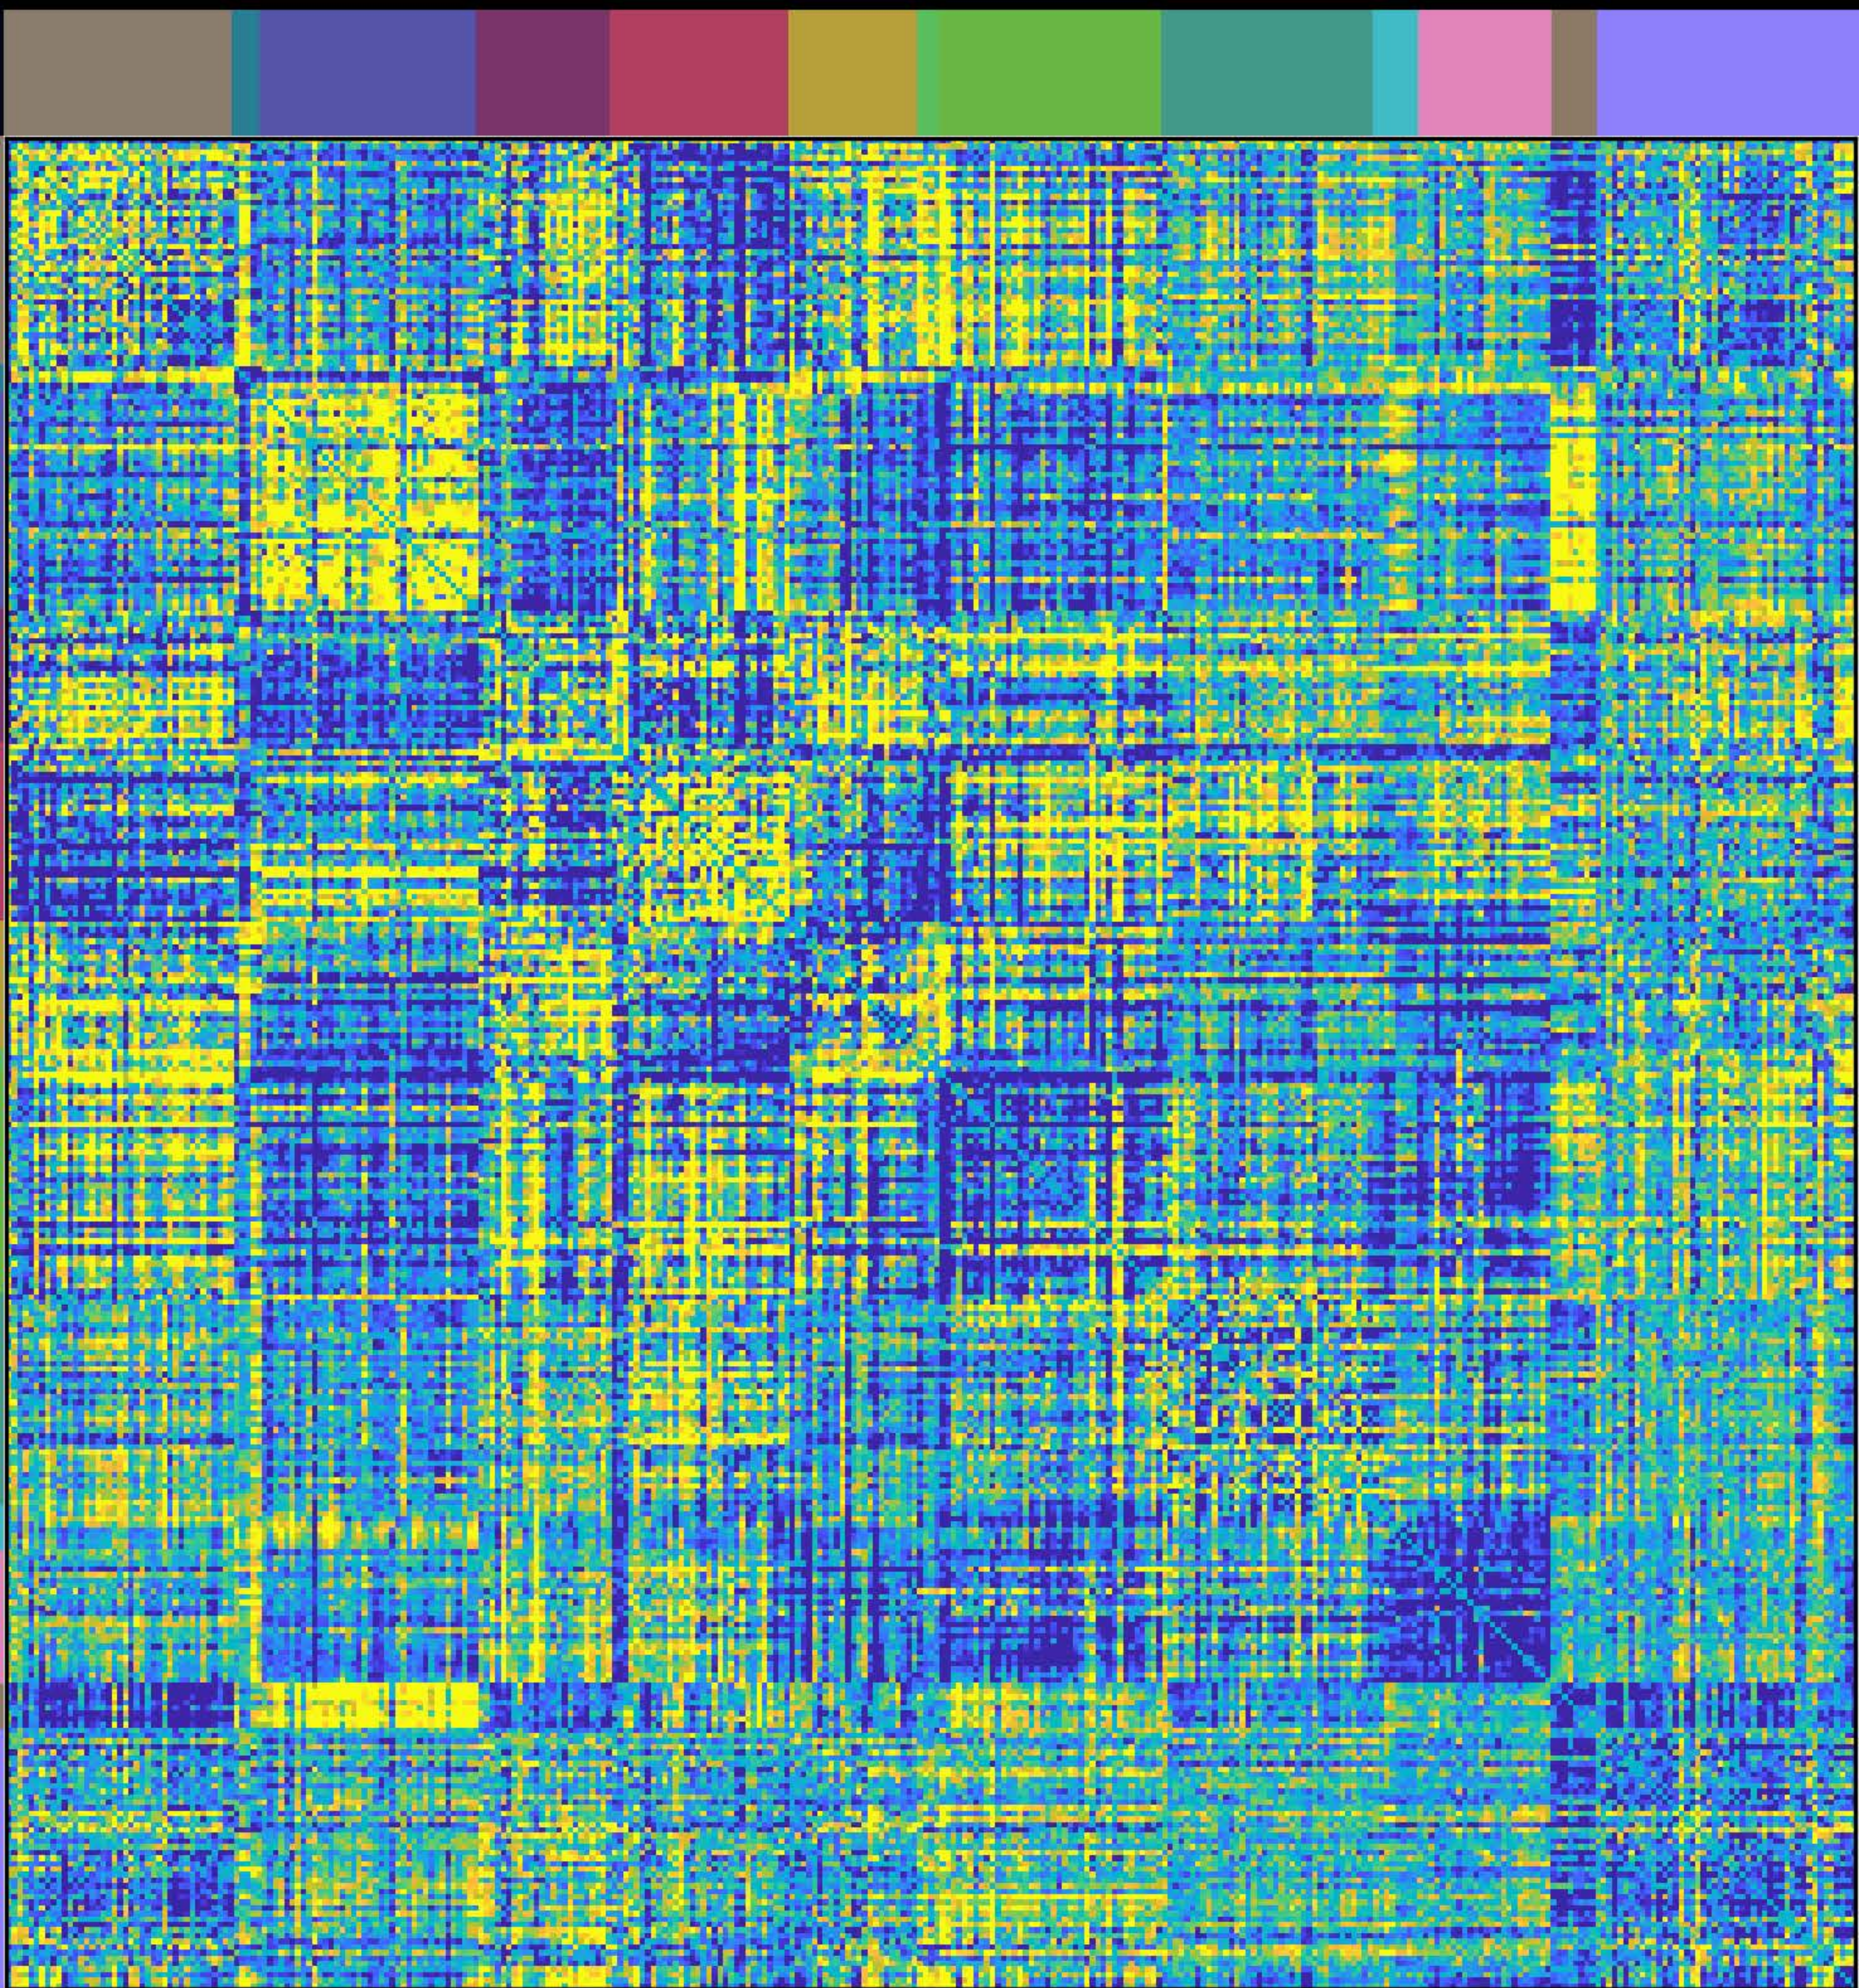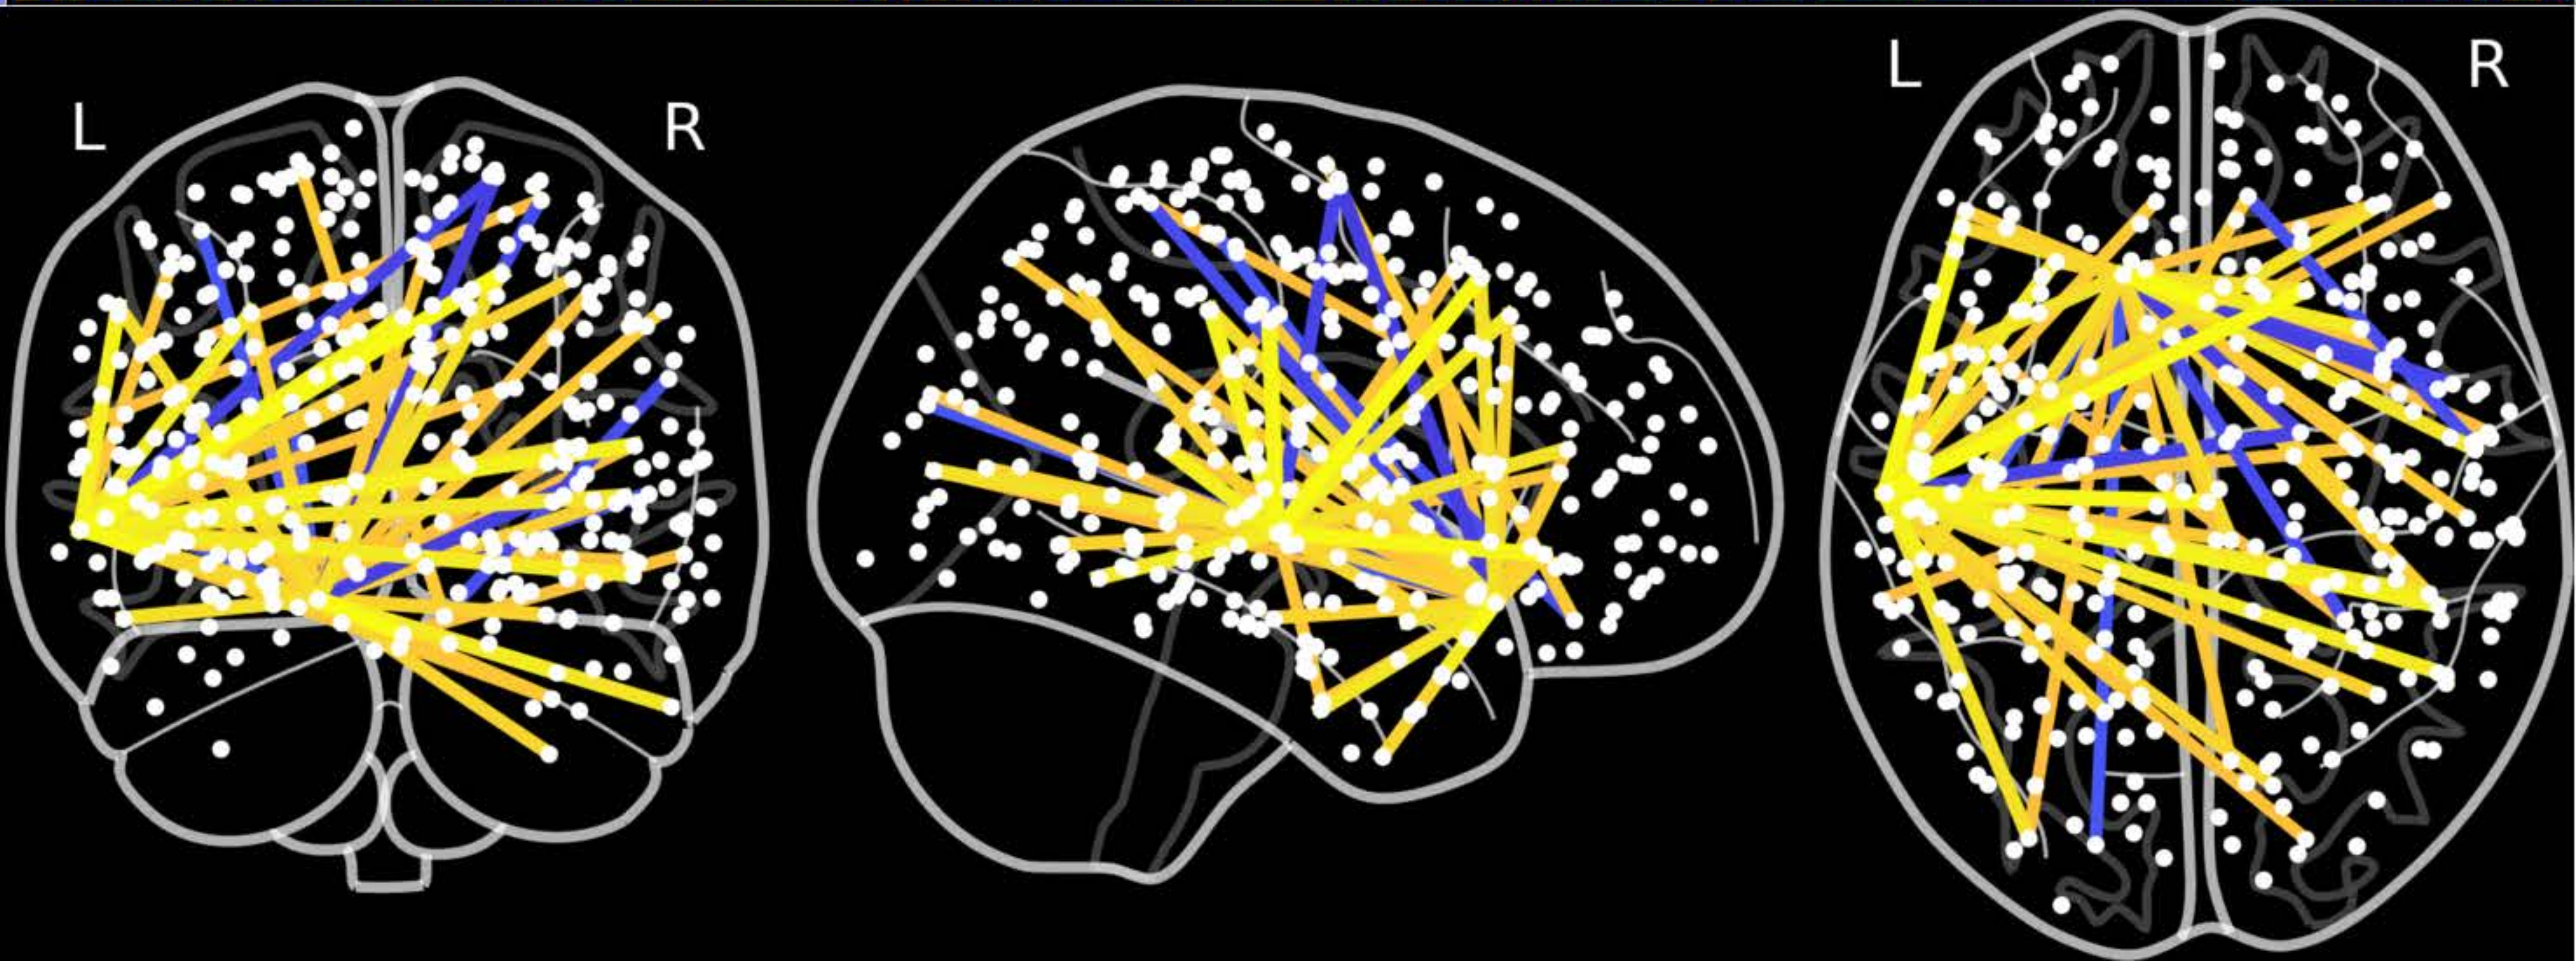



component\_14

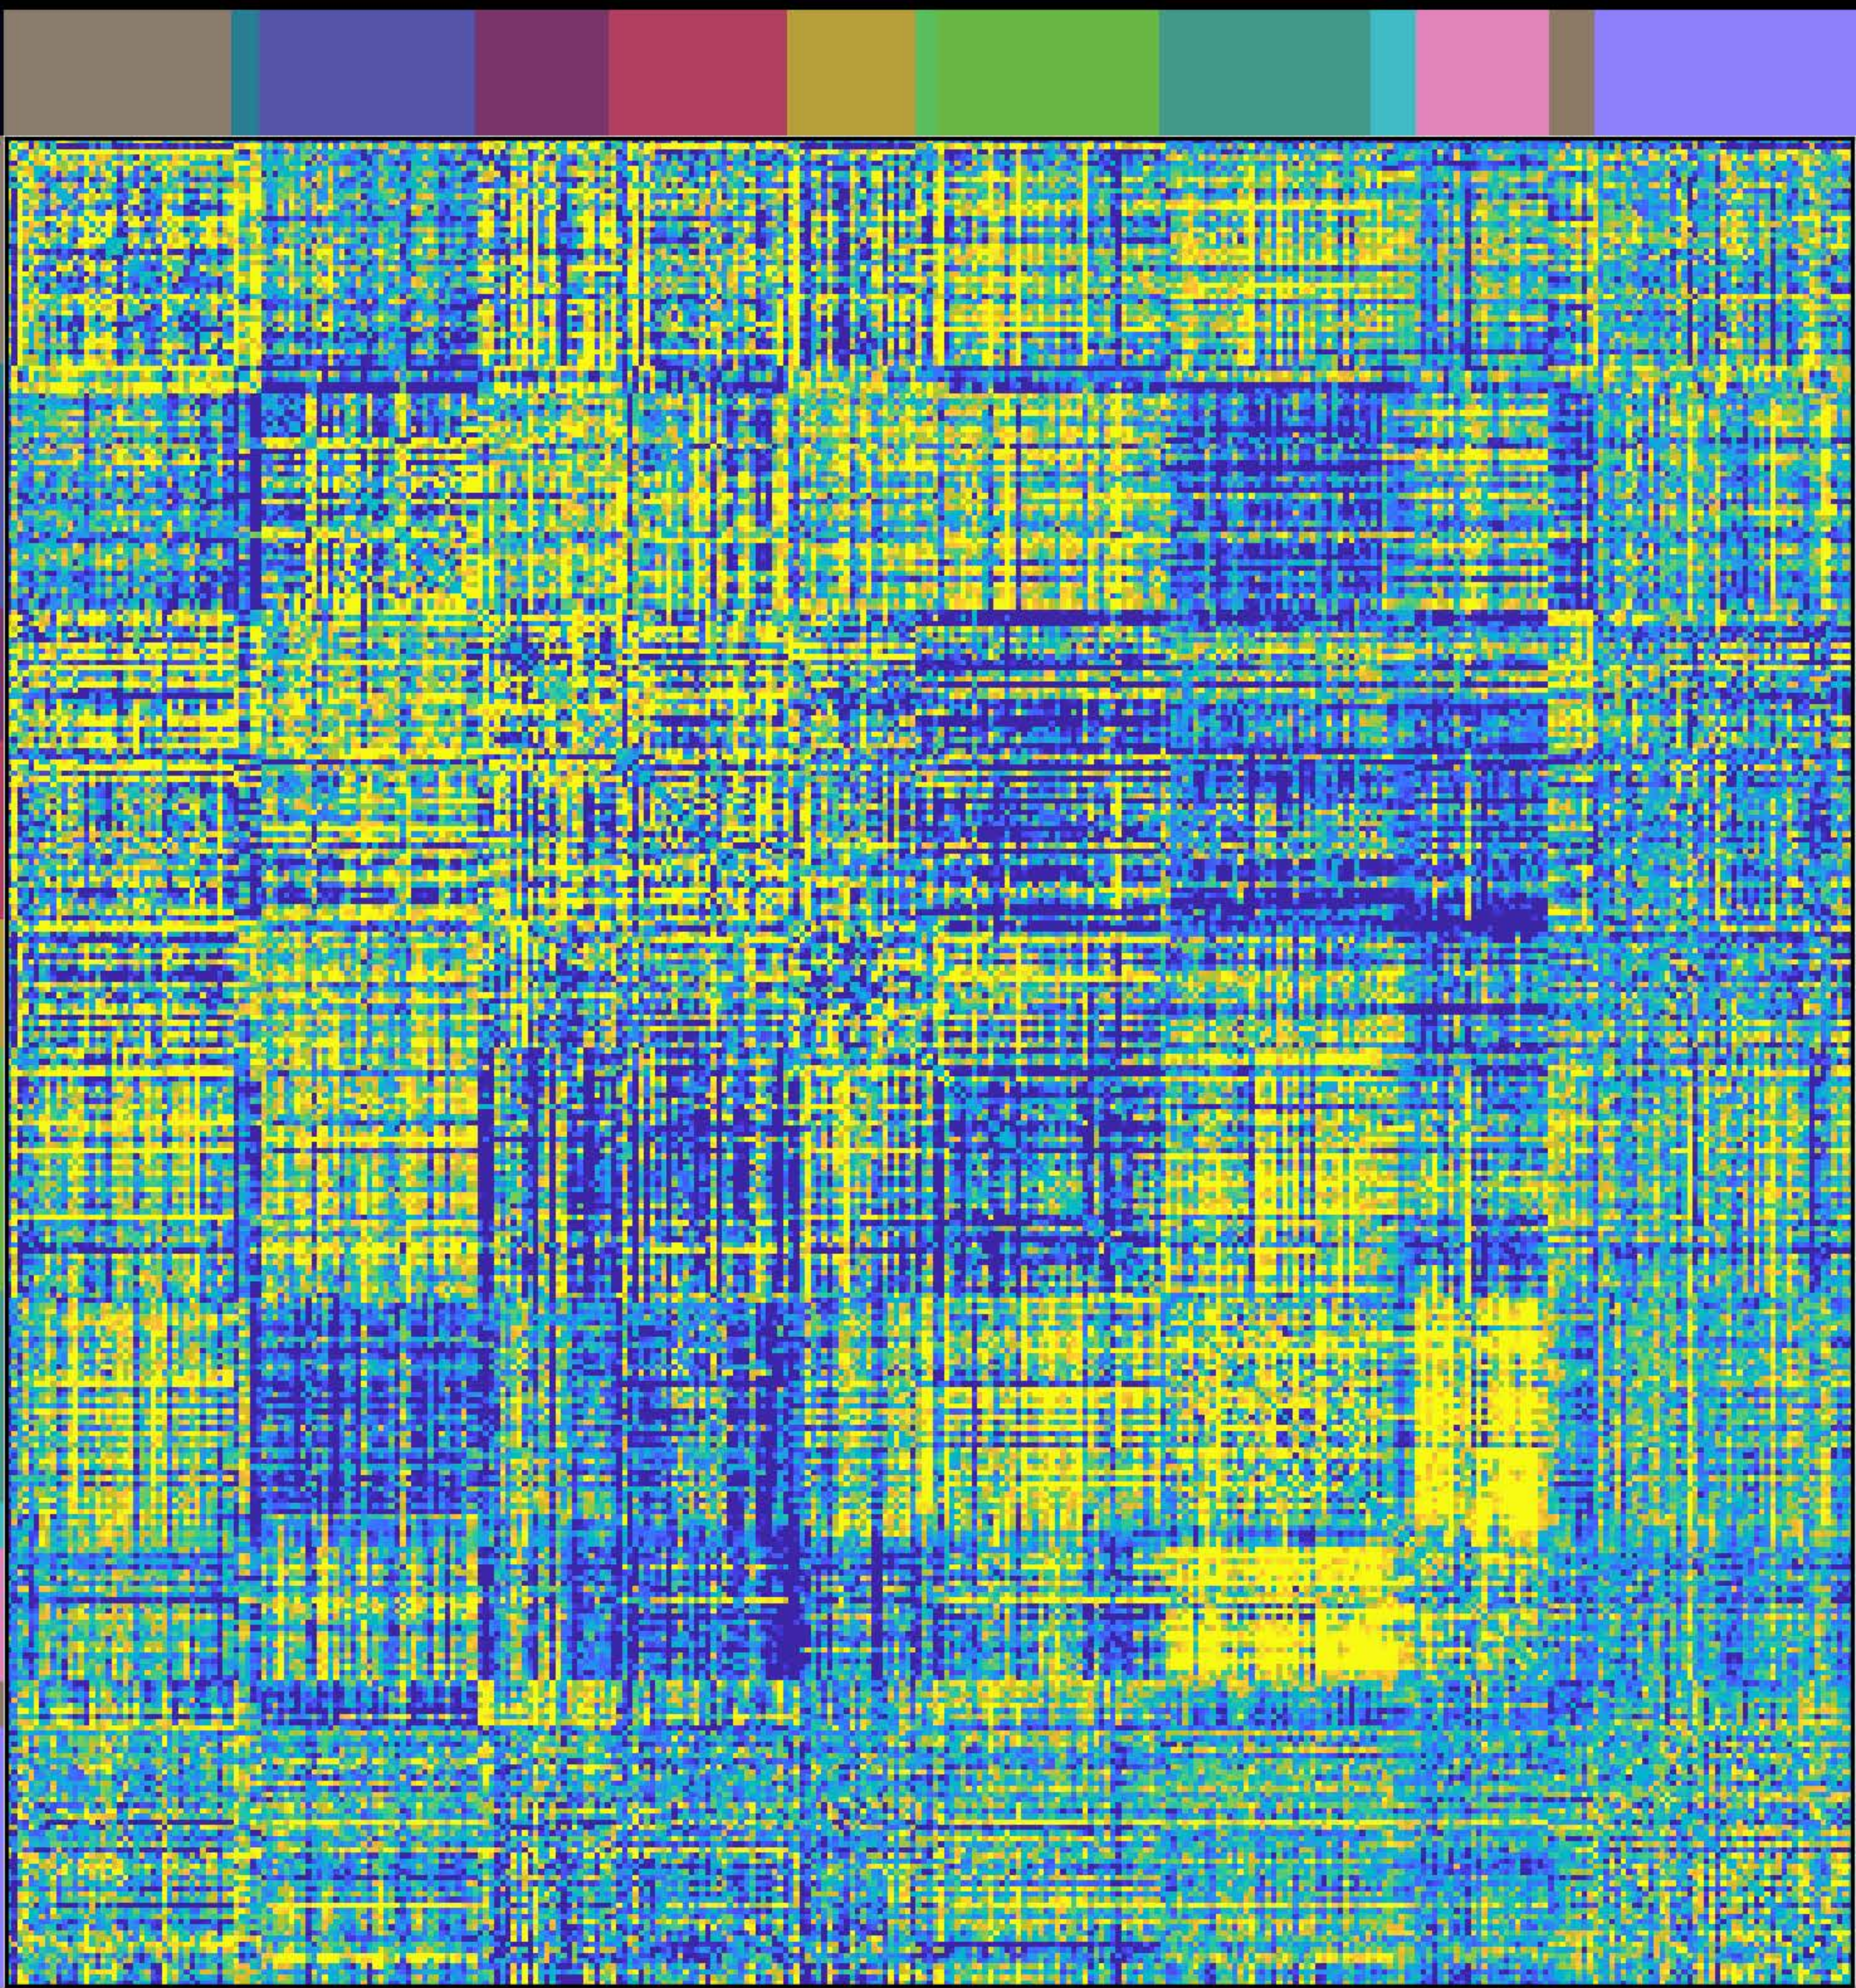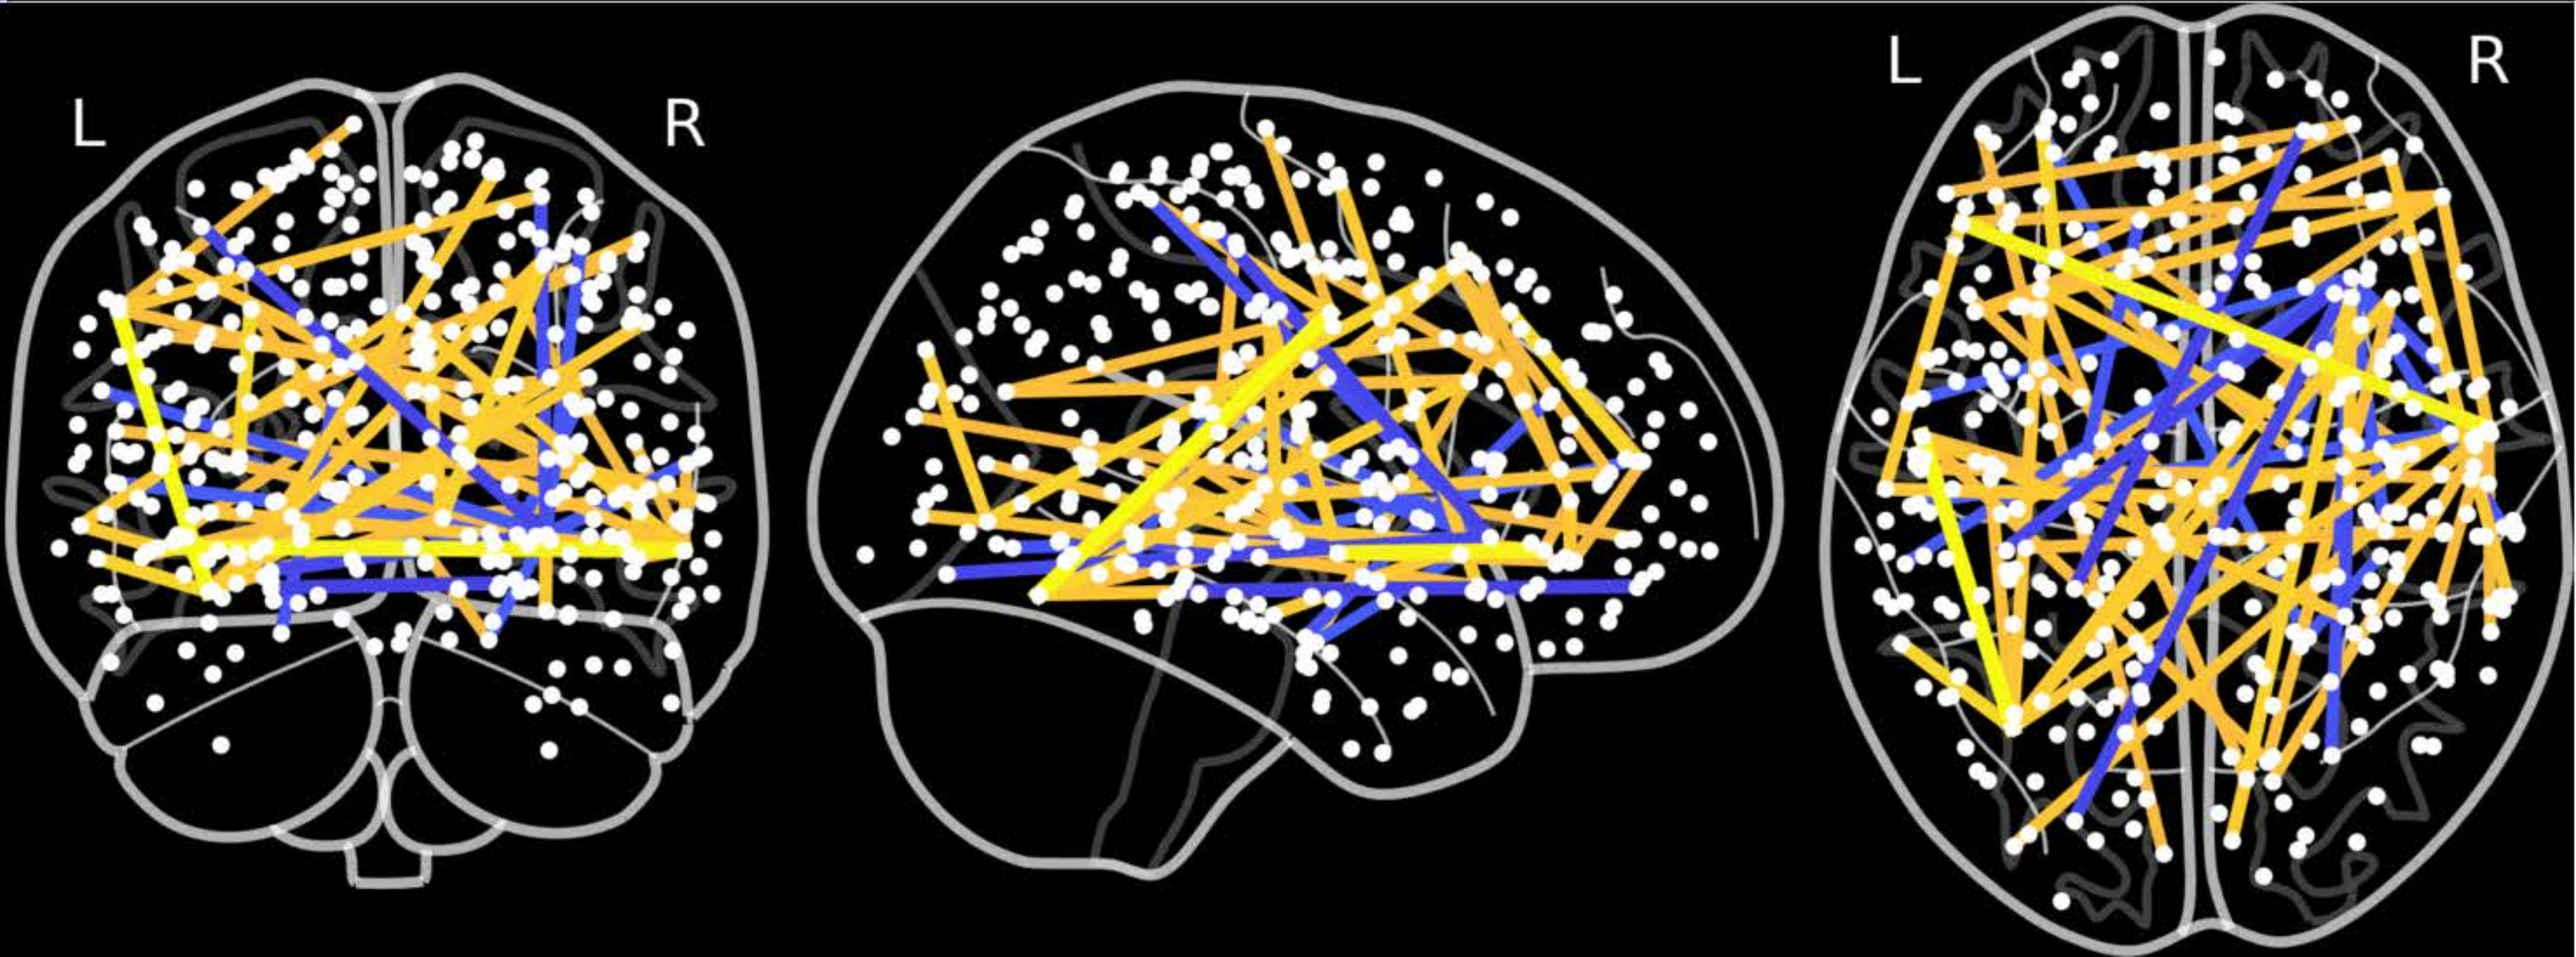



# component\_15

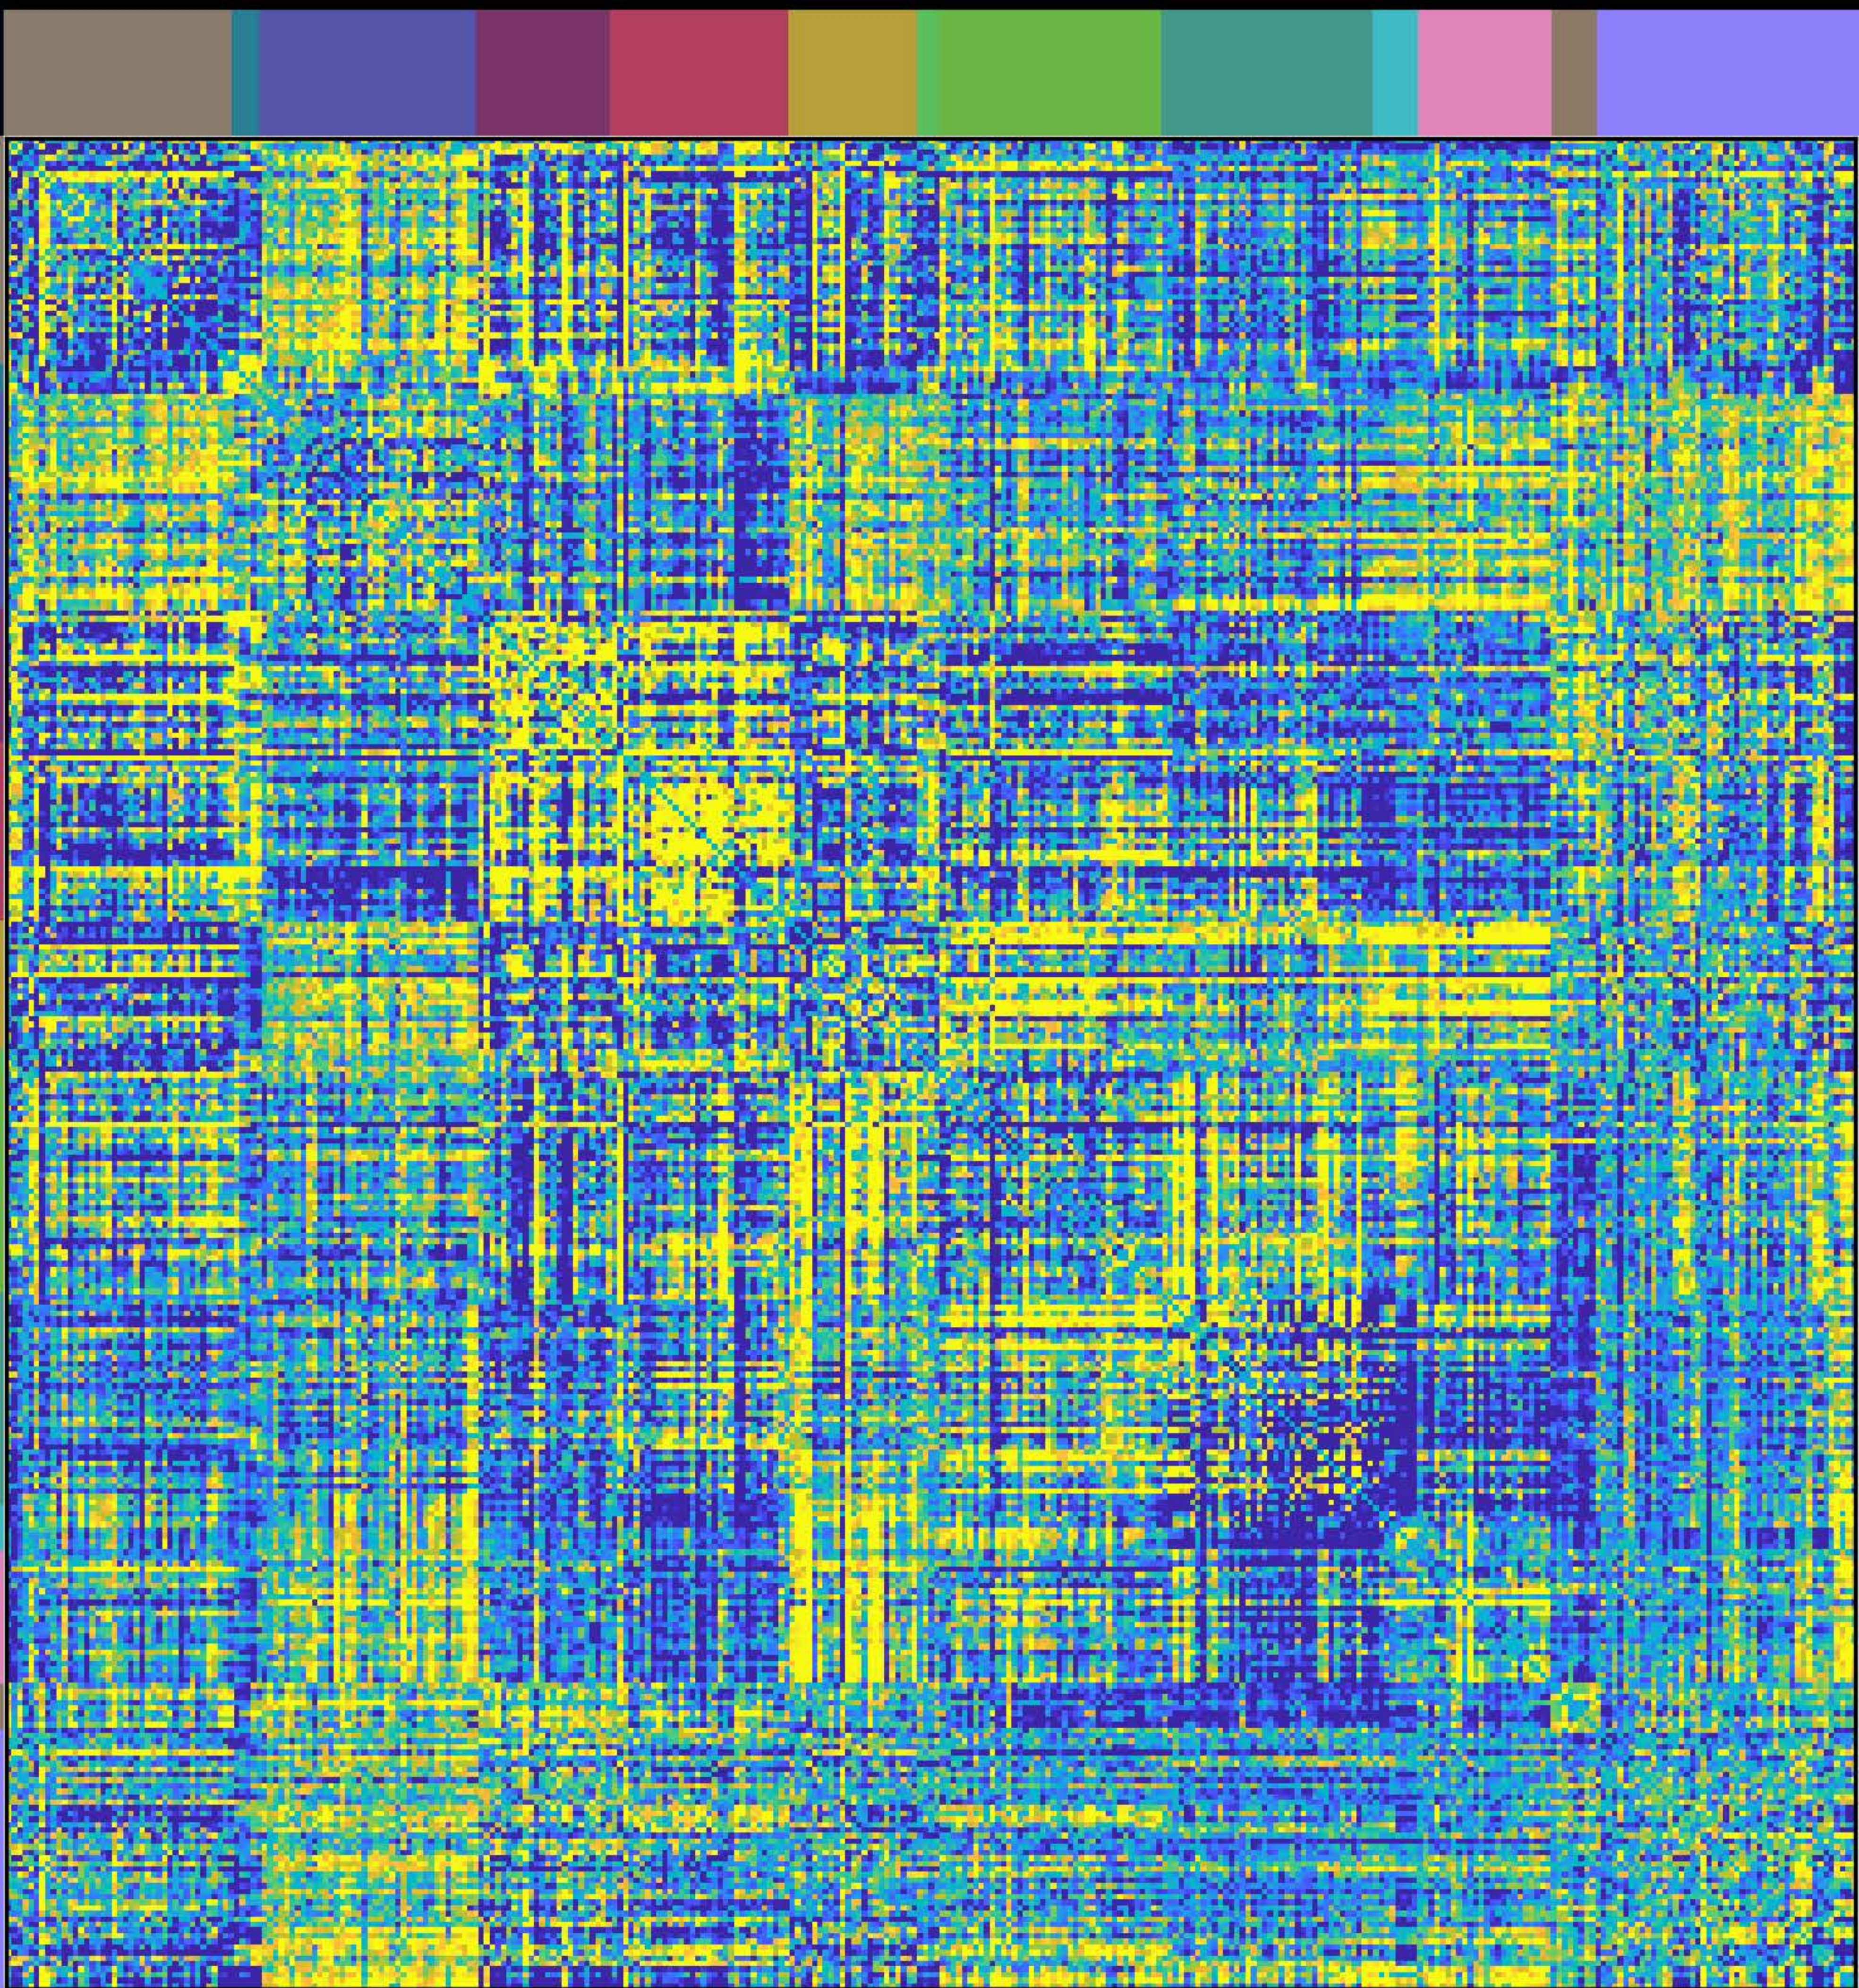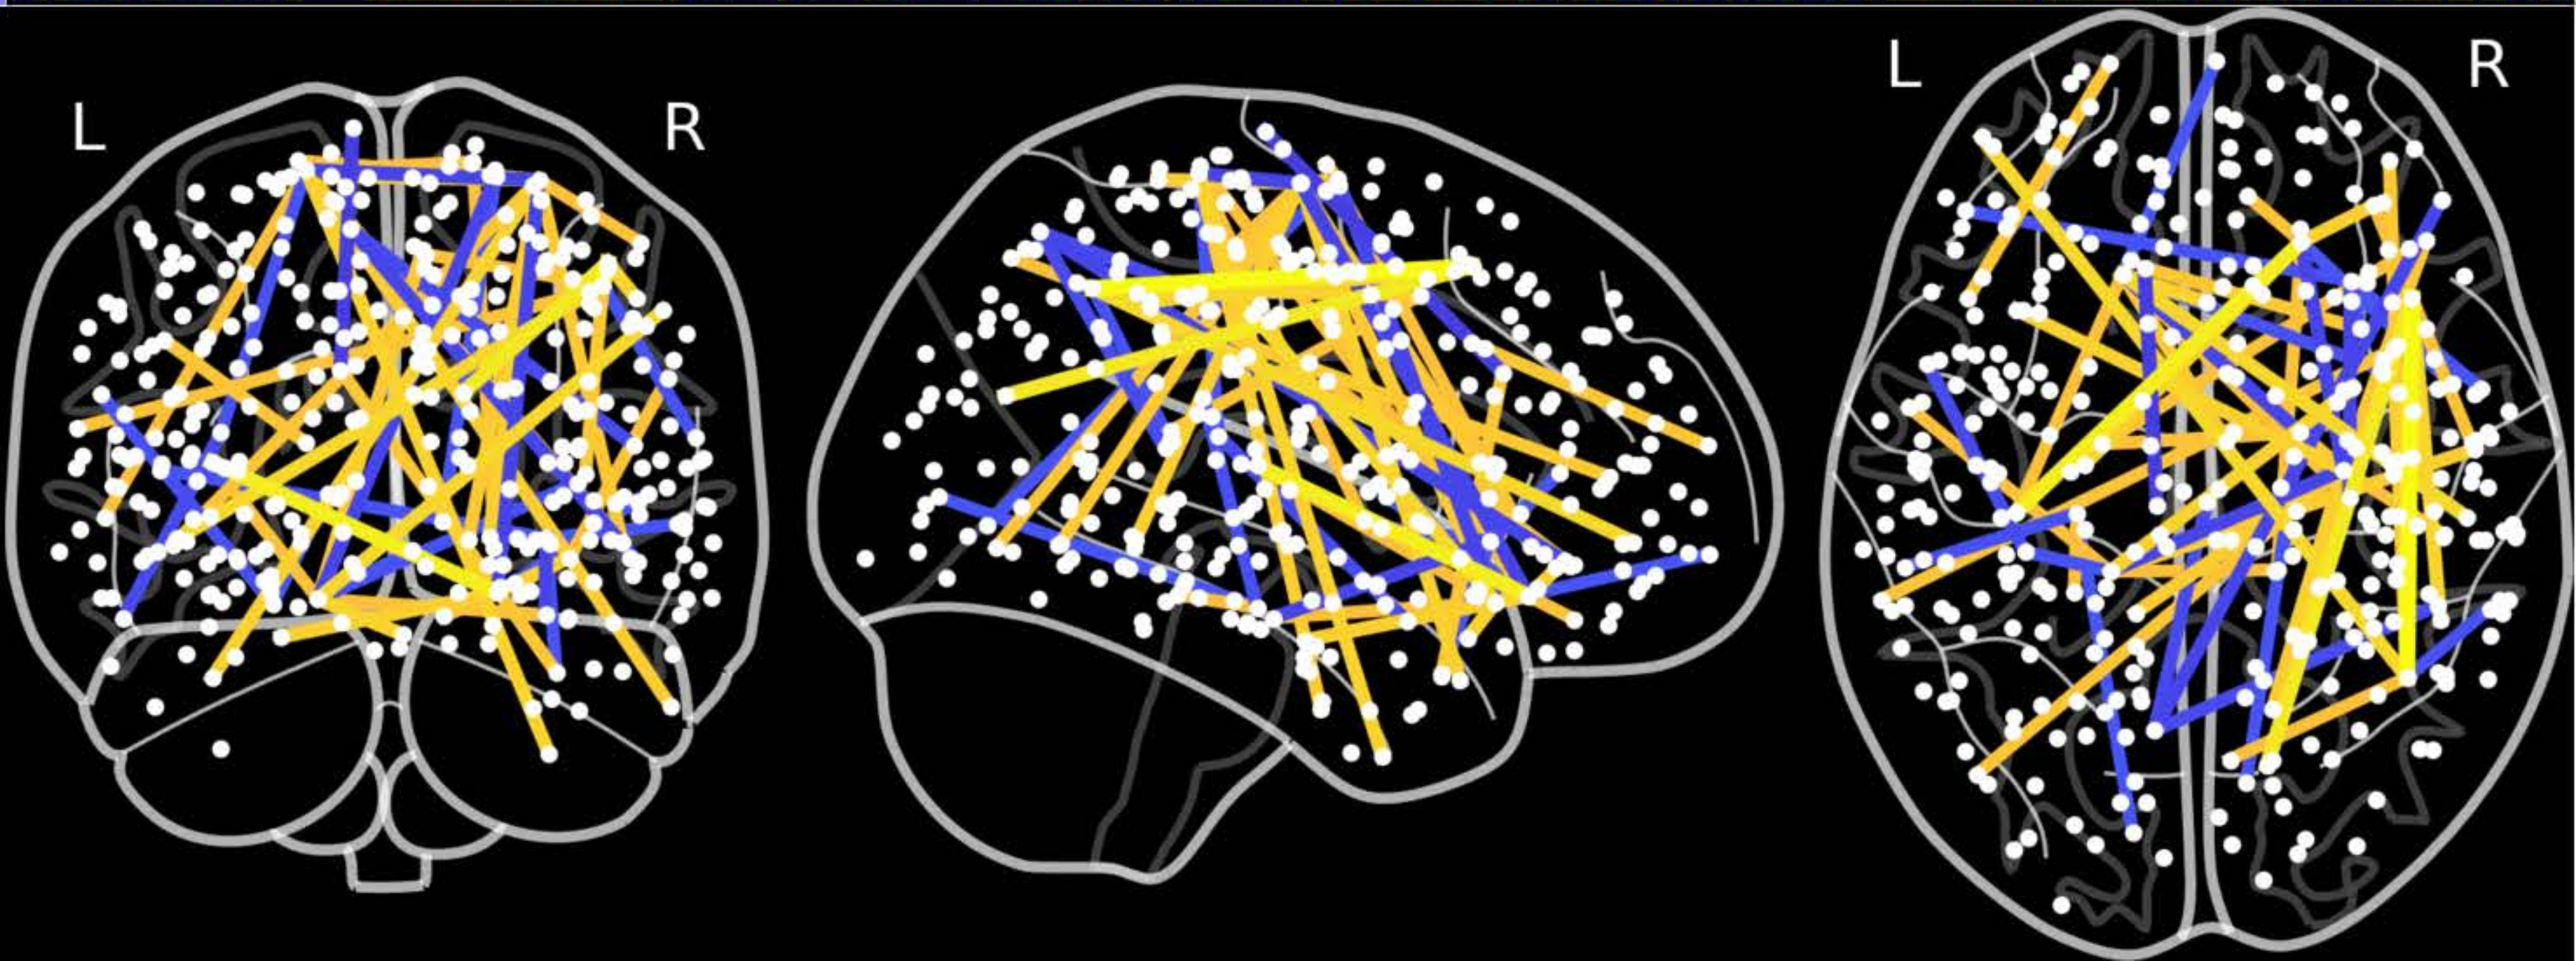



component\_16

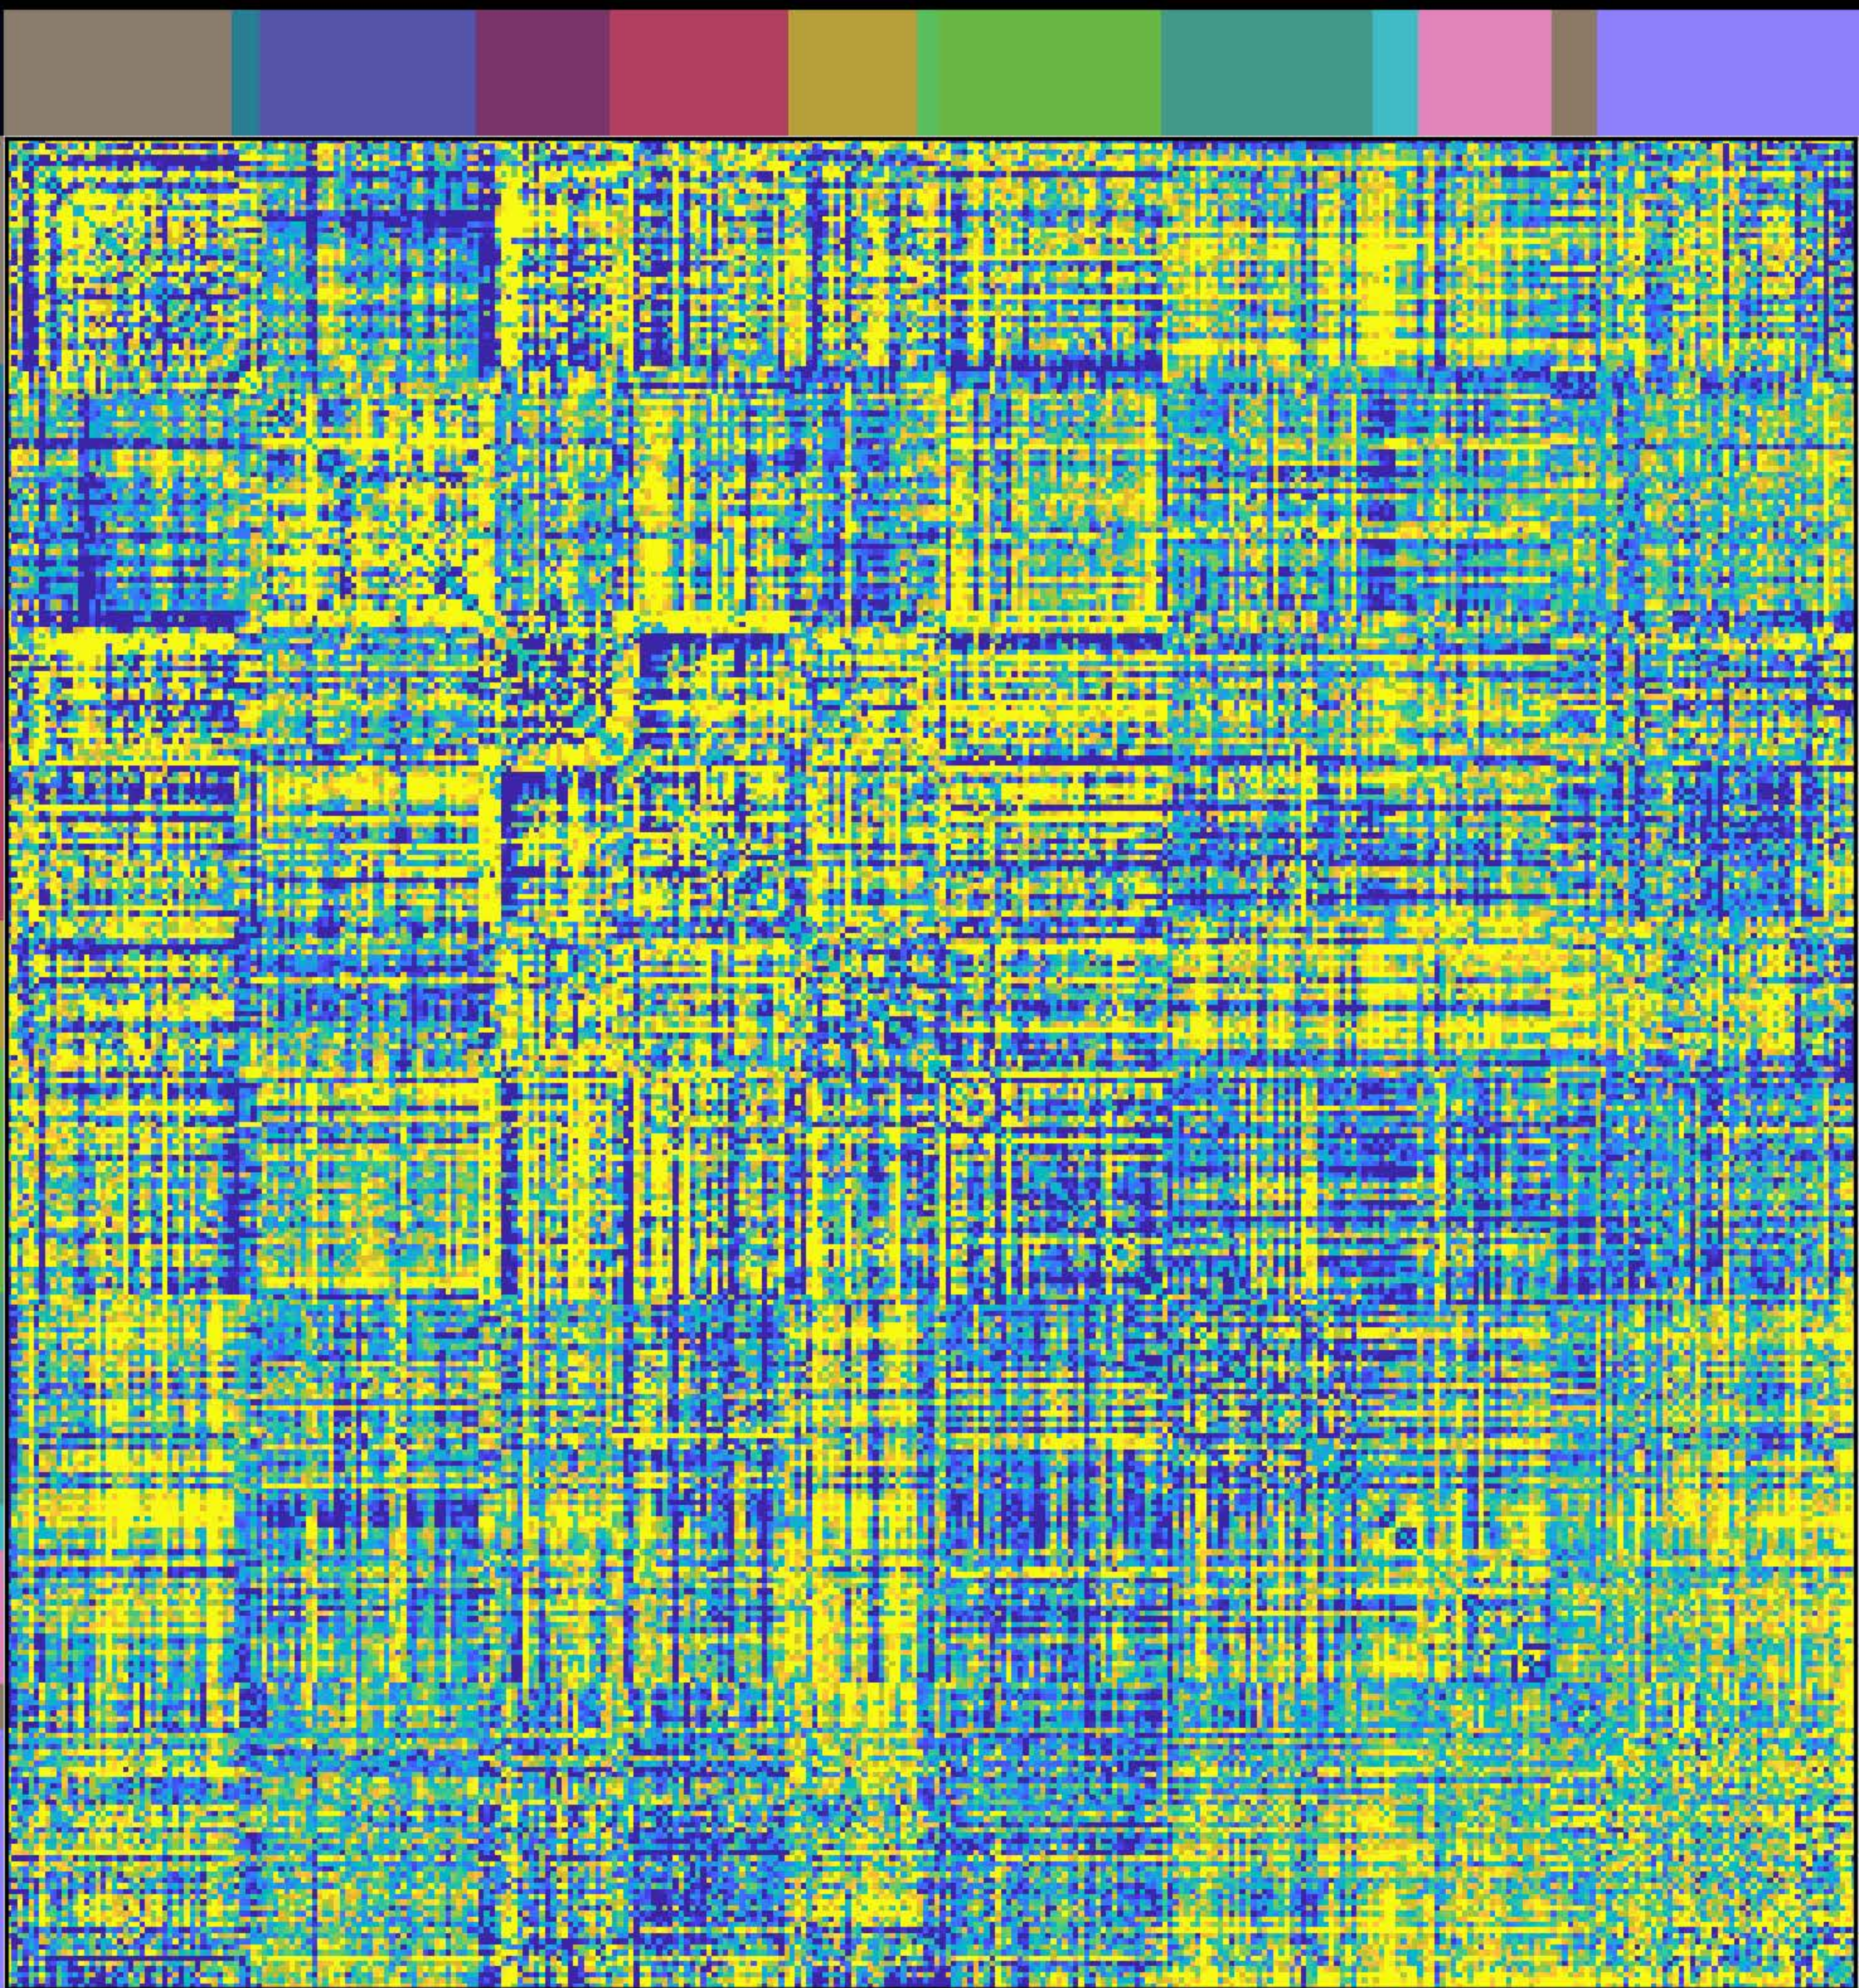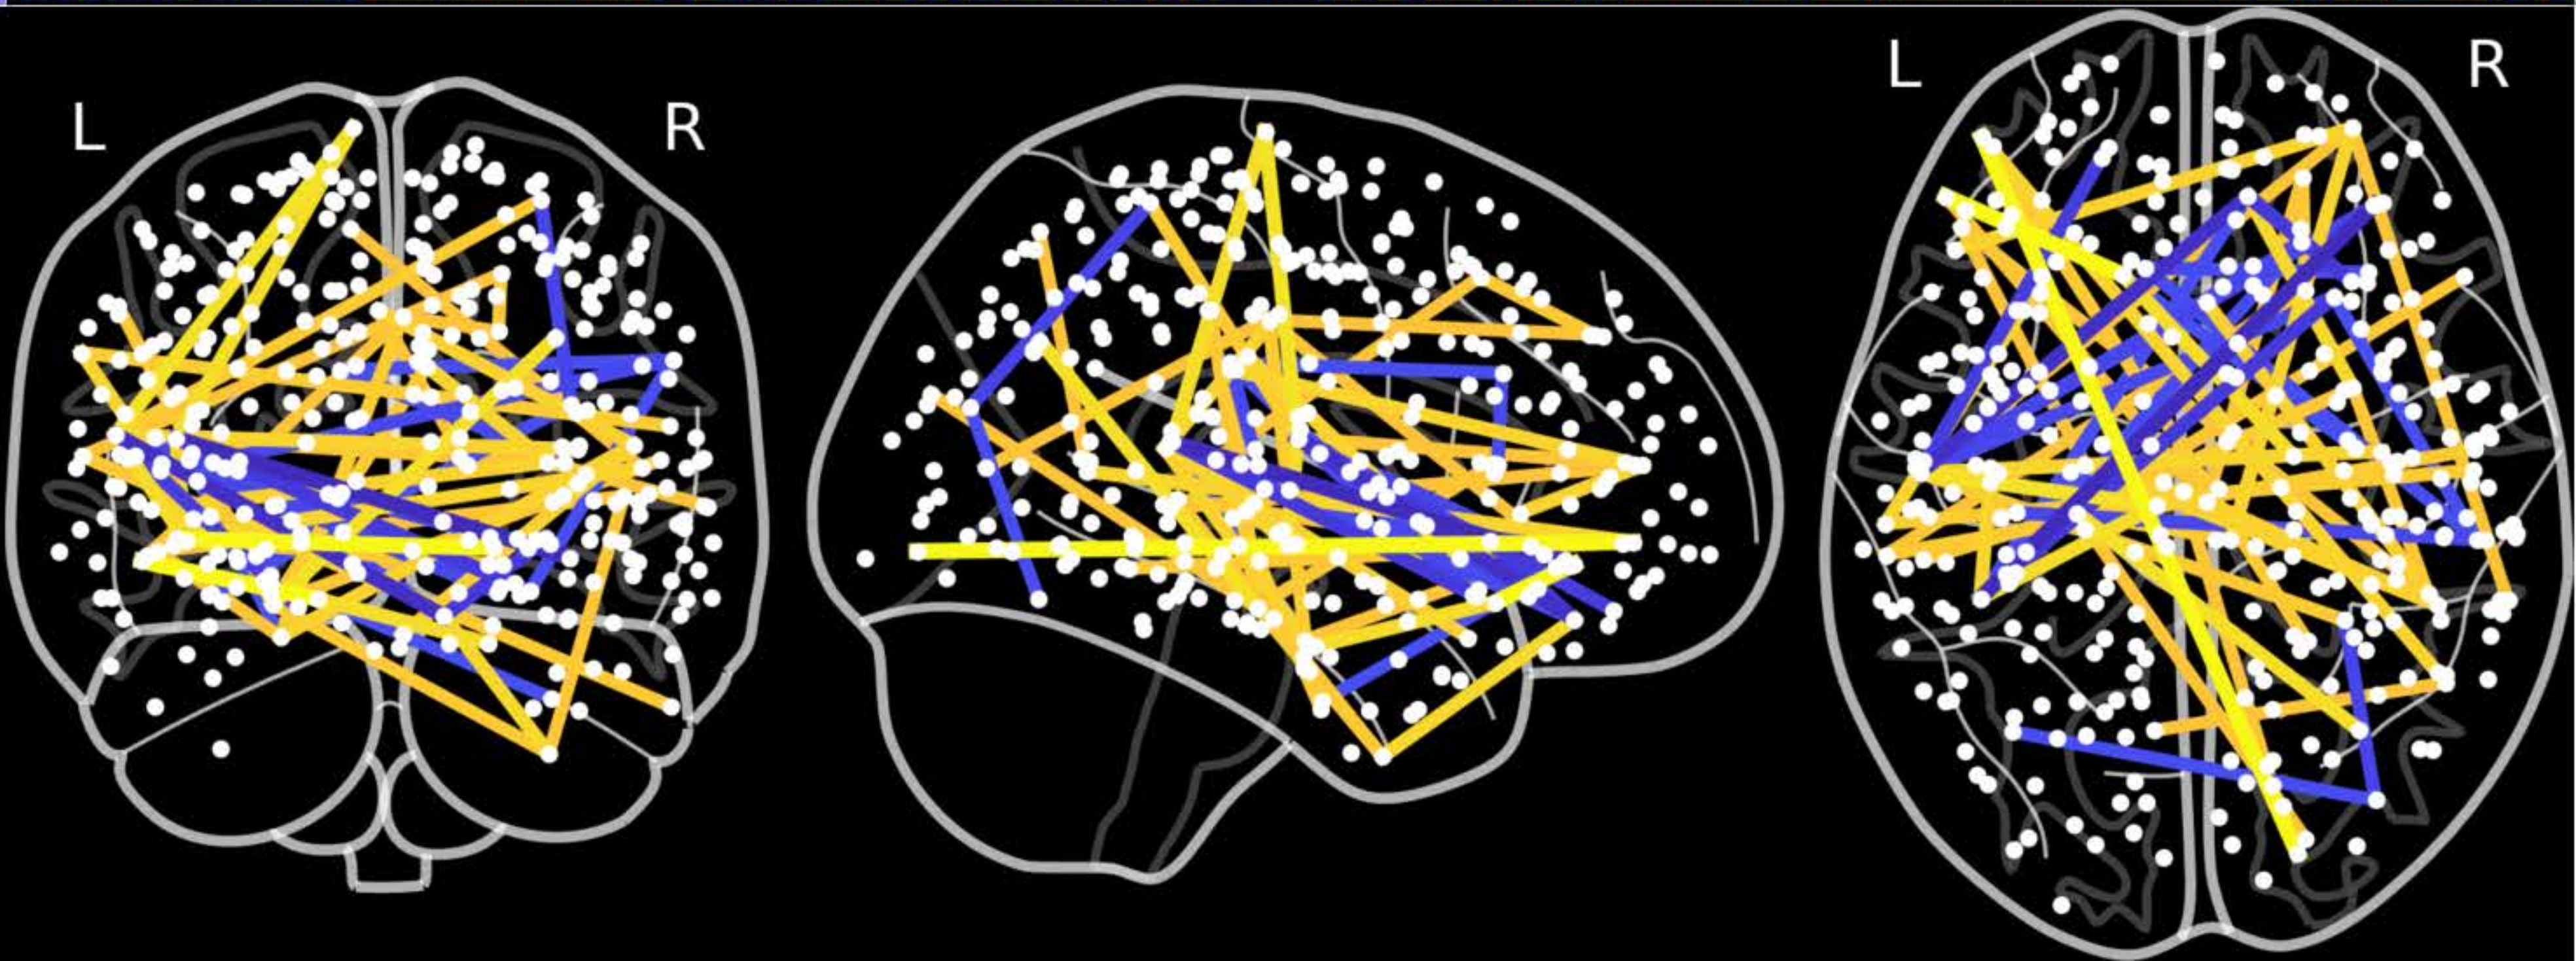



component\_17

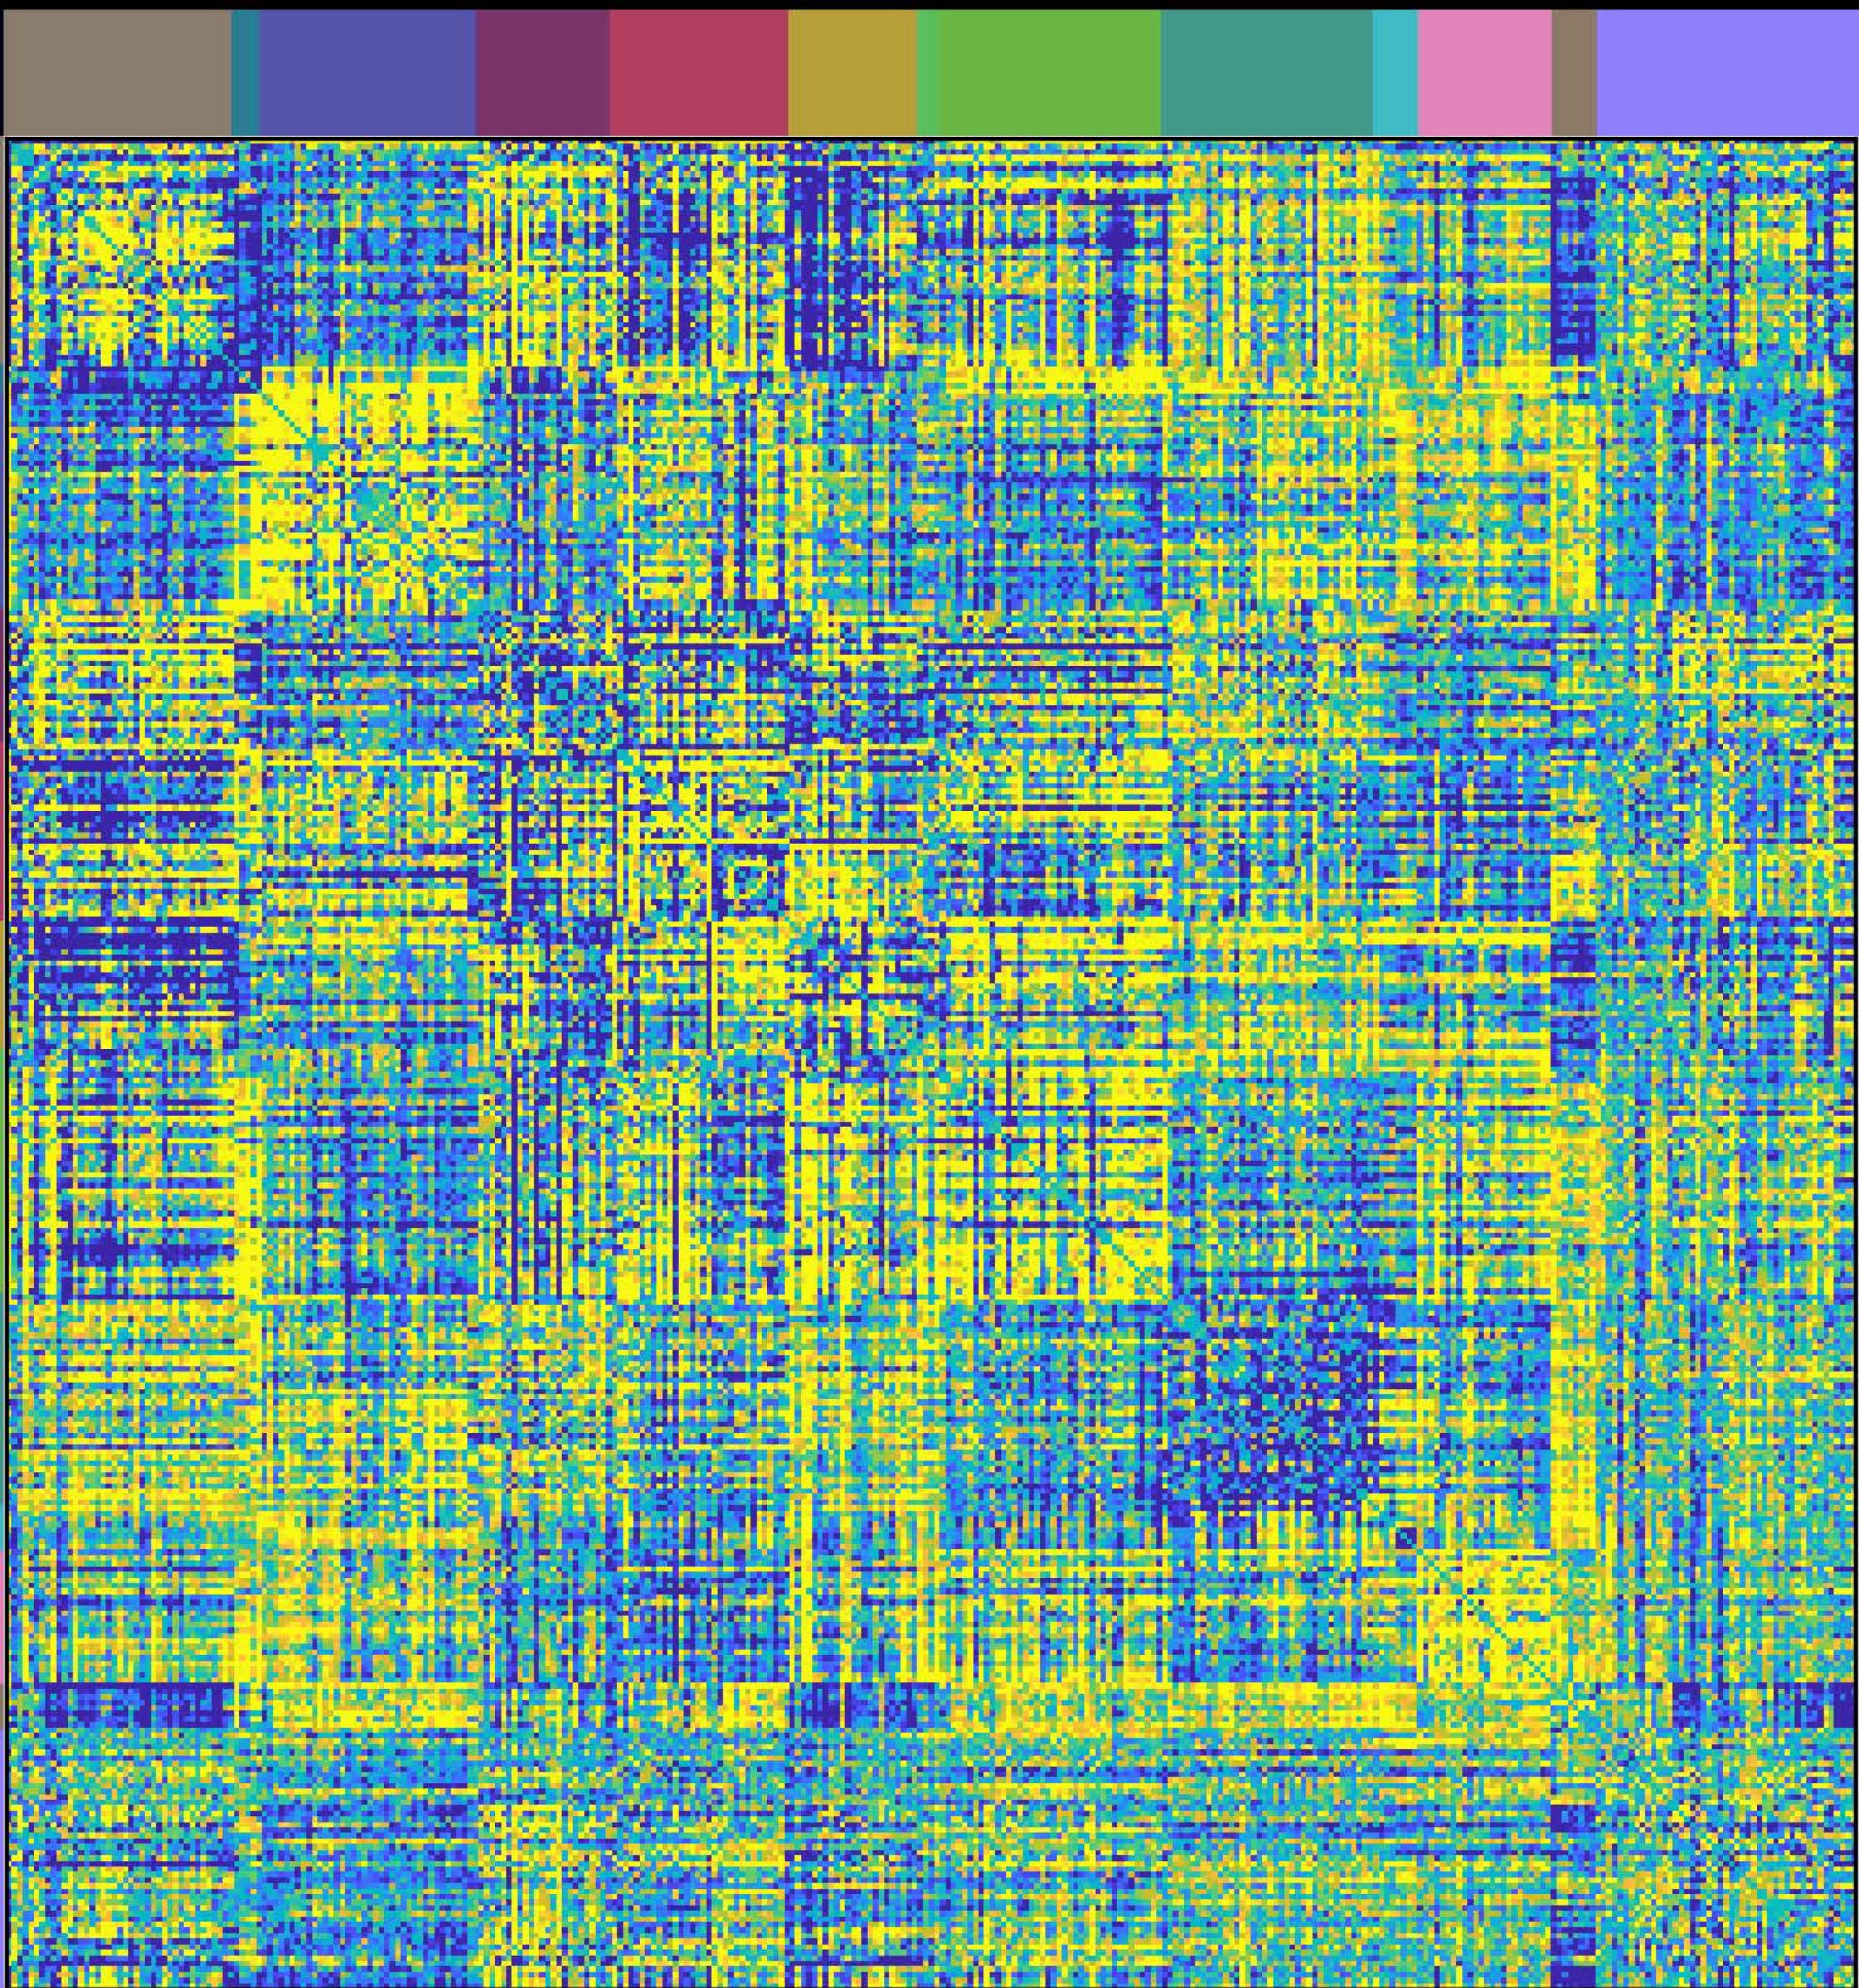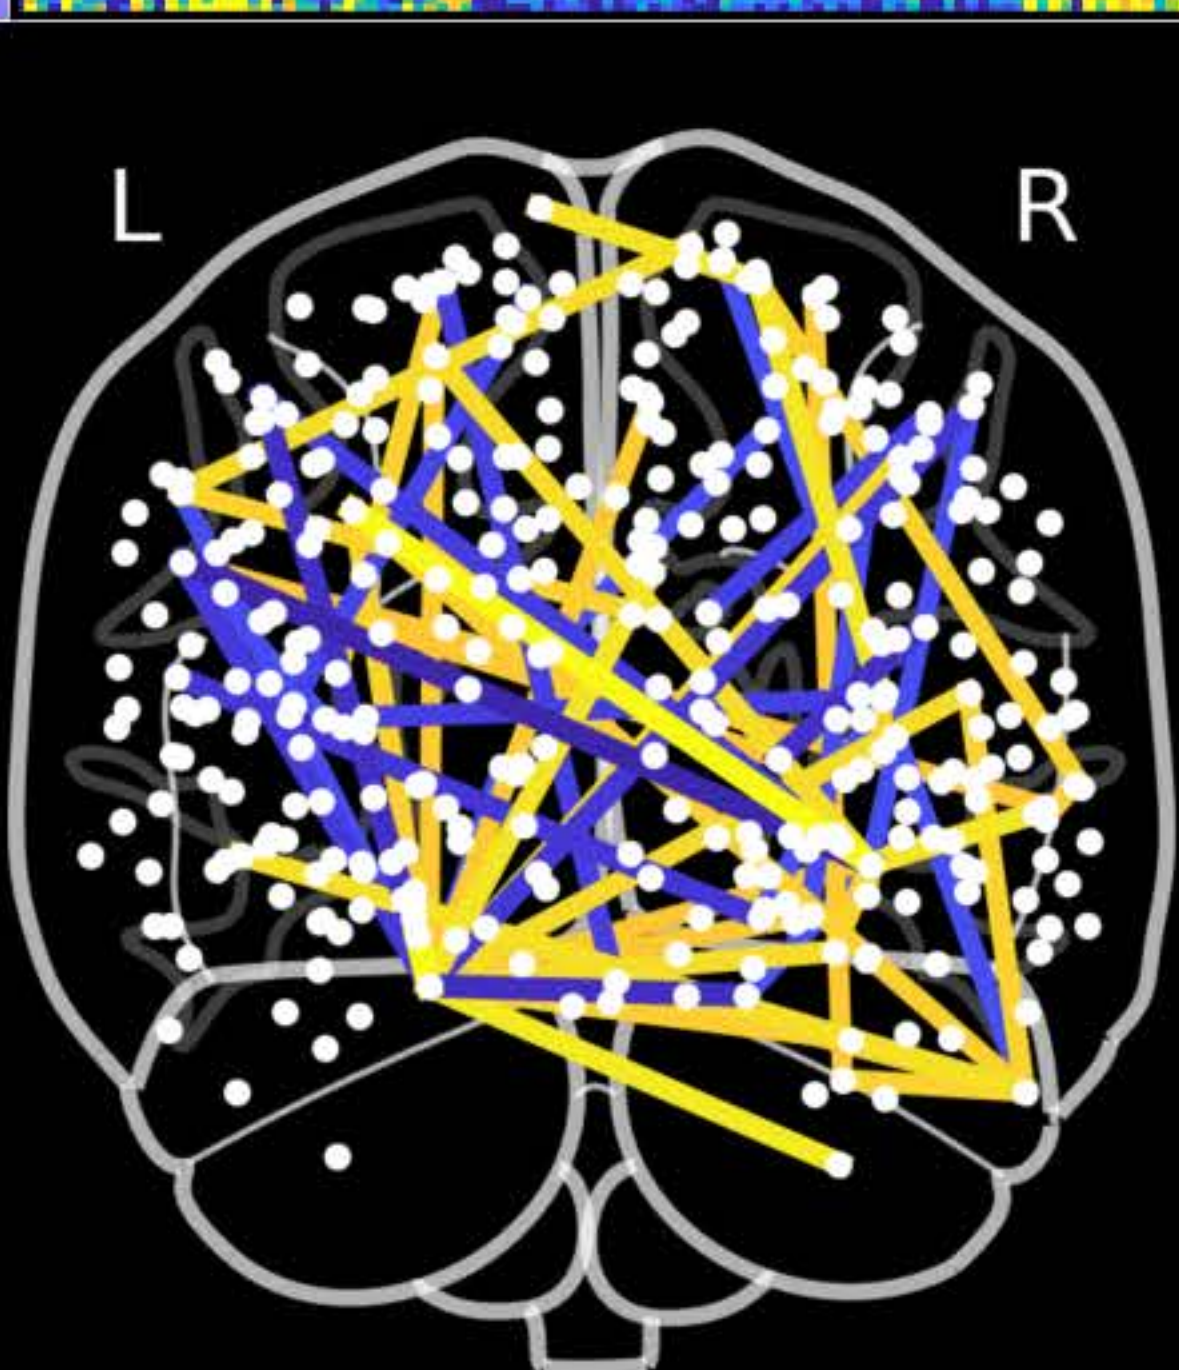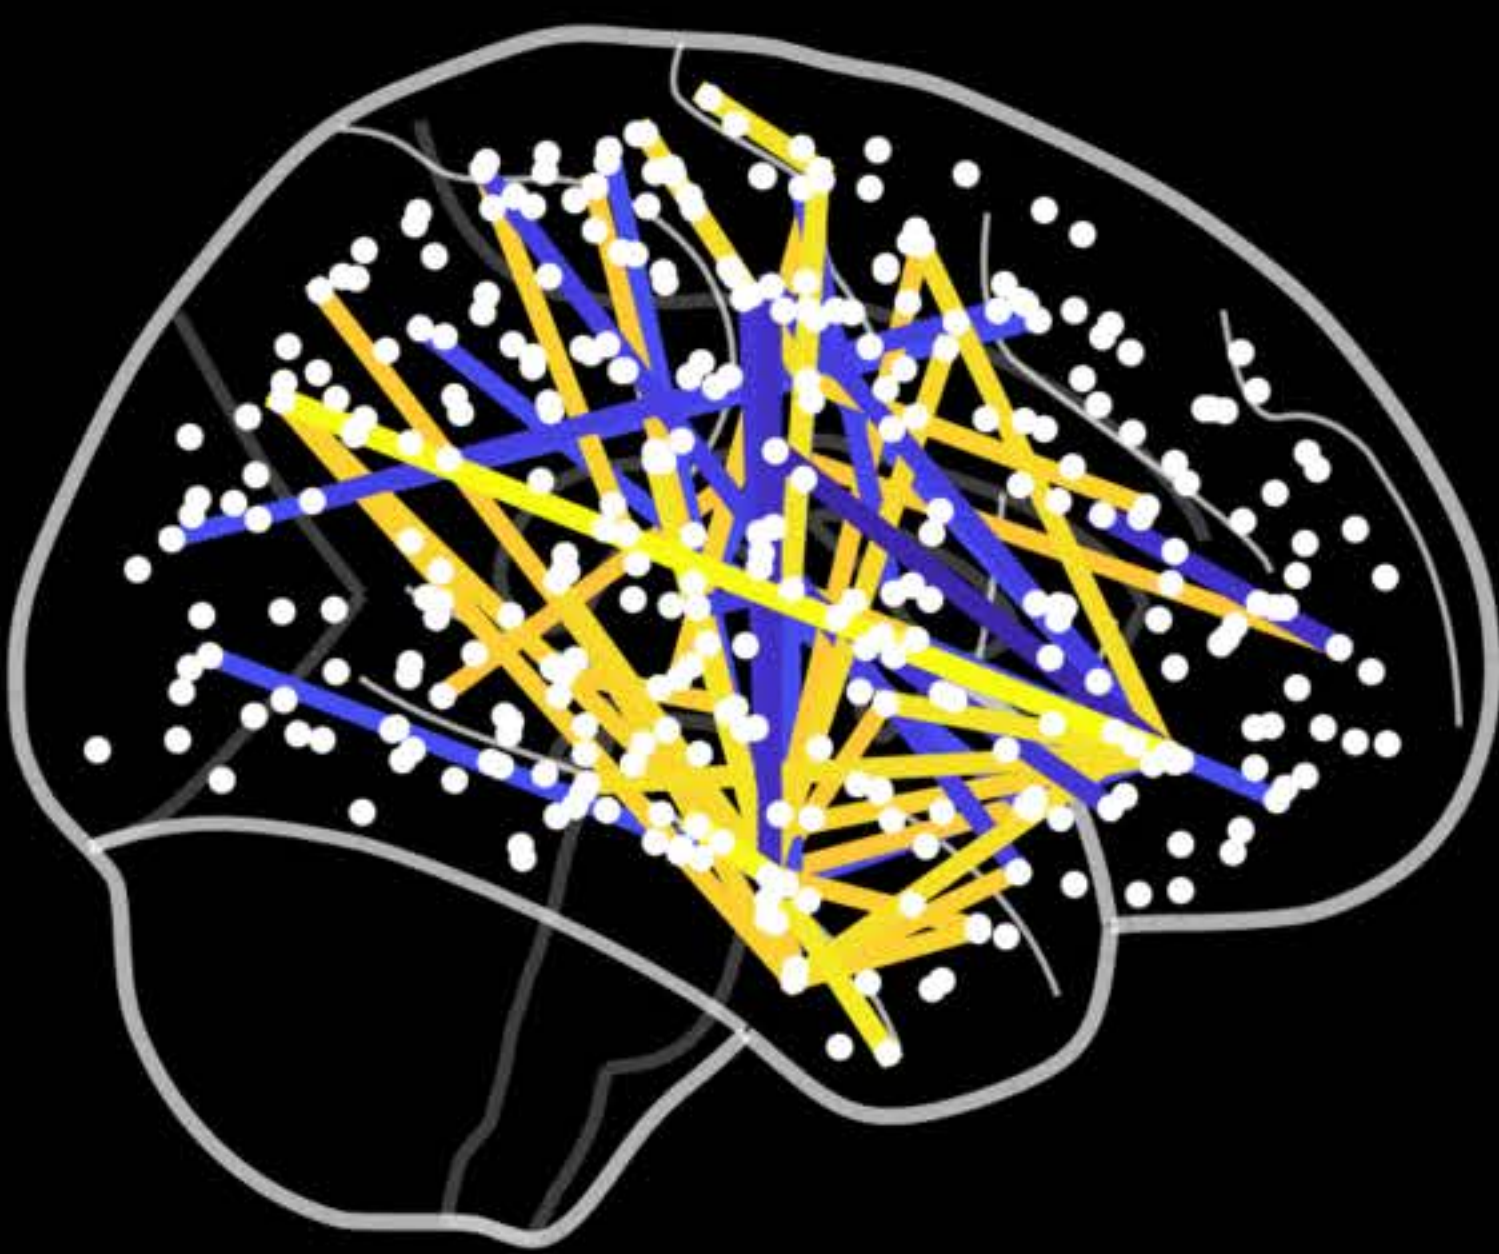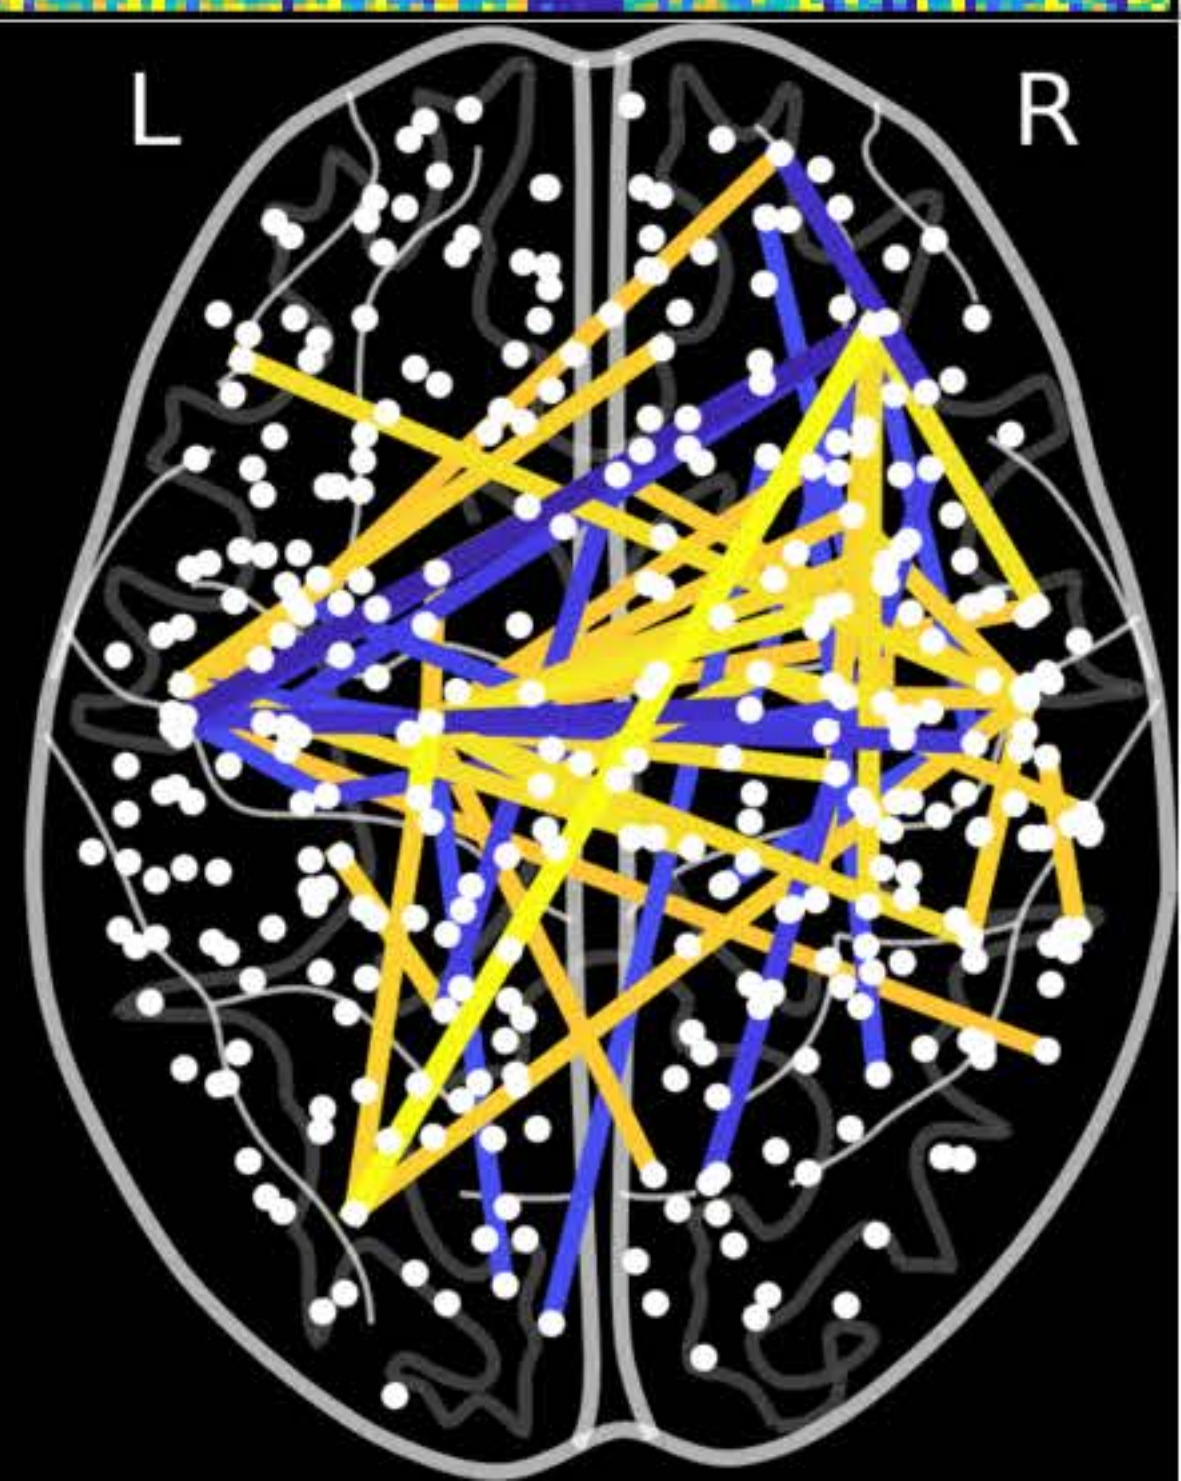



# component\_18

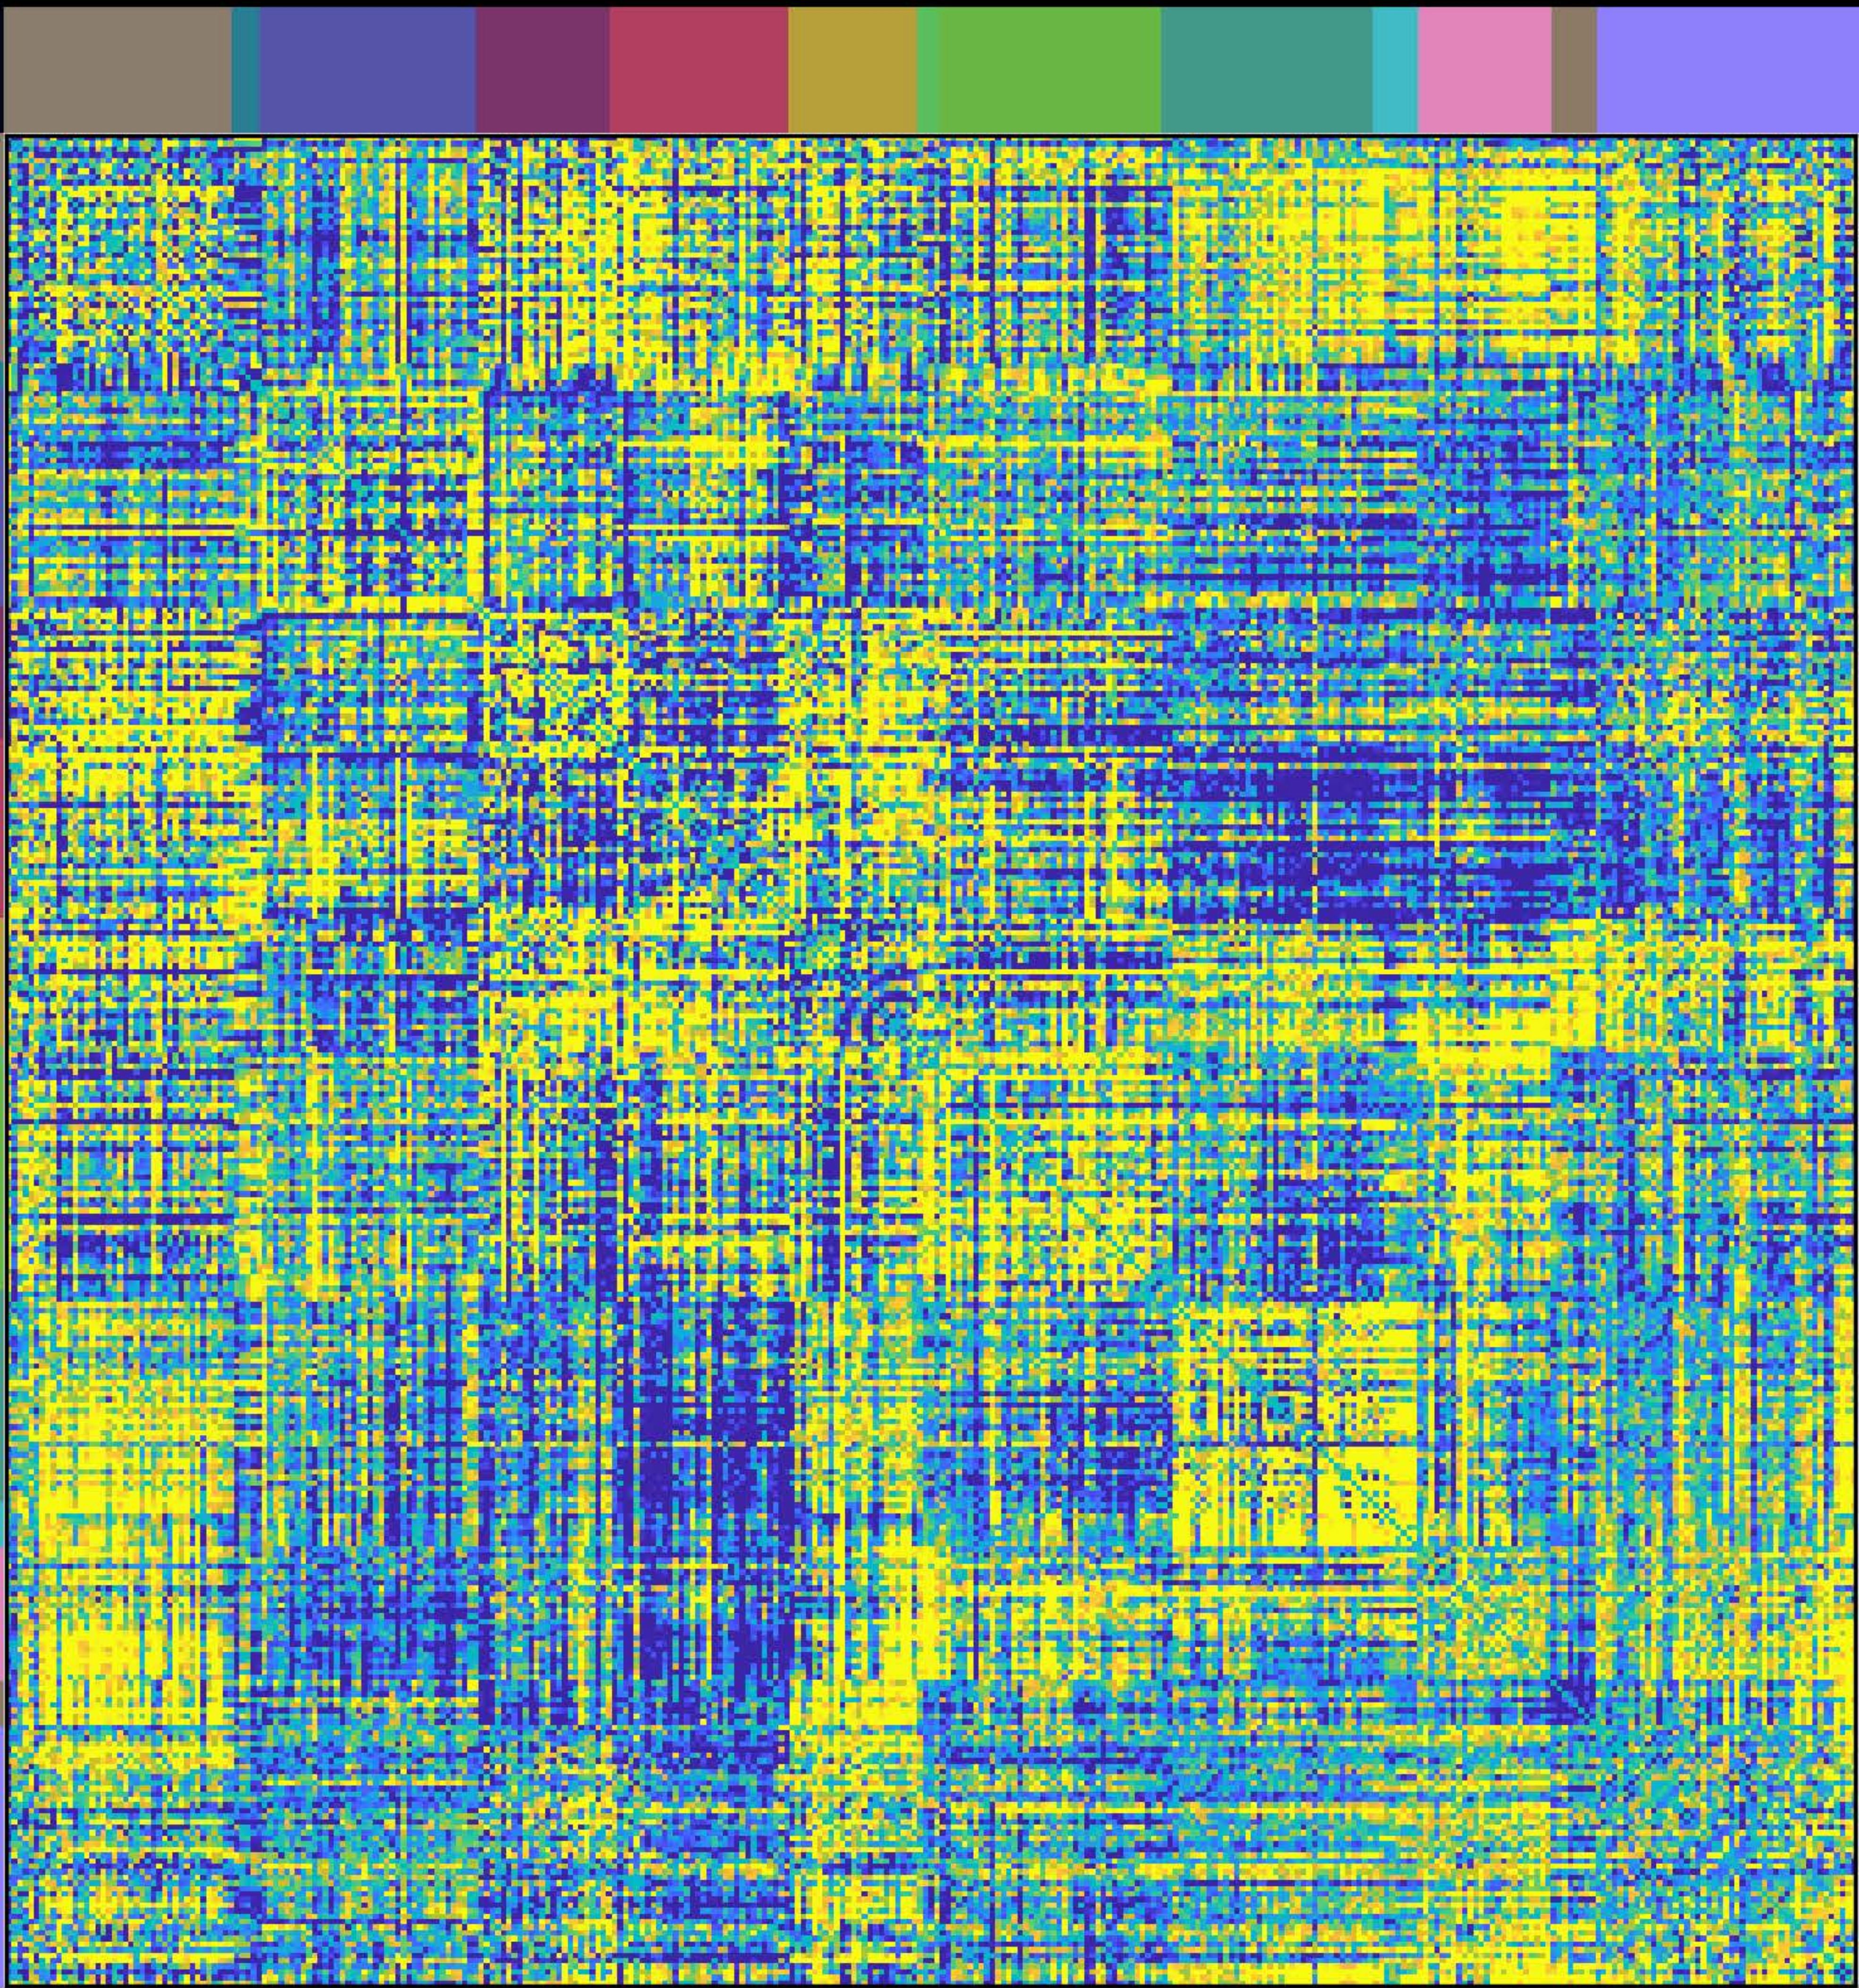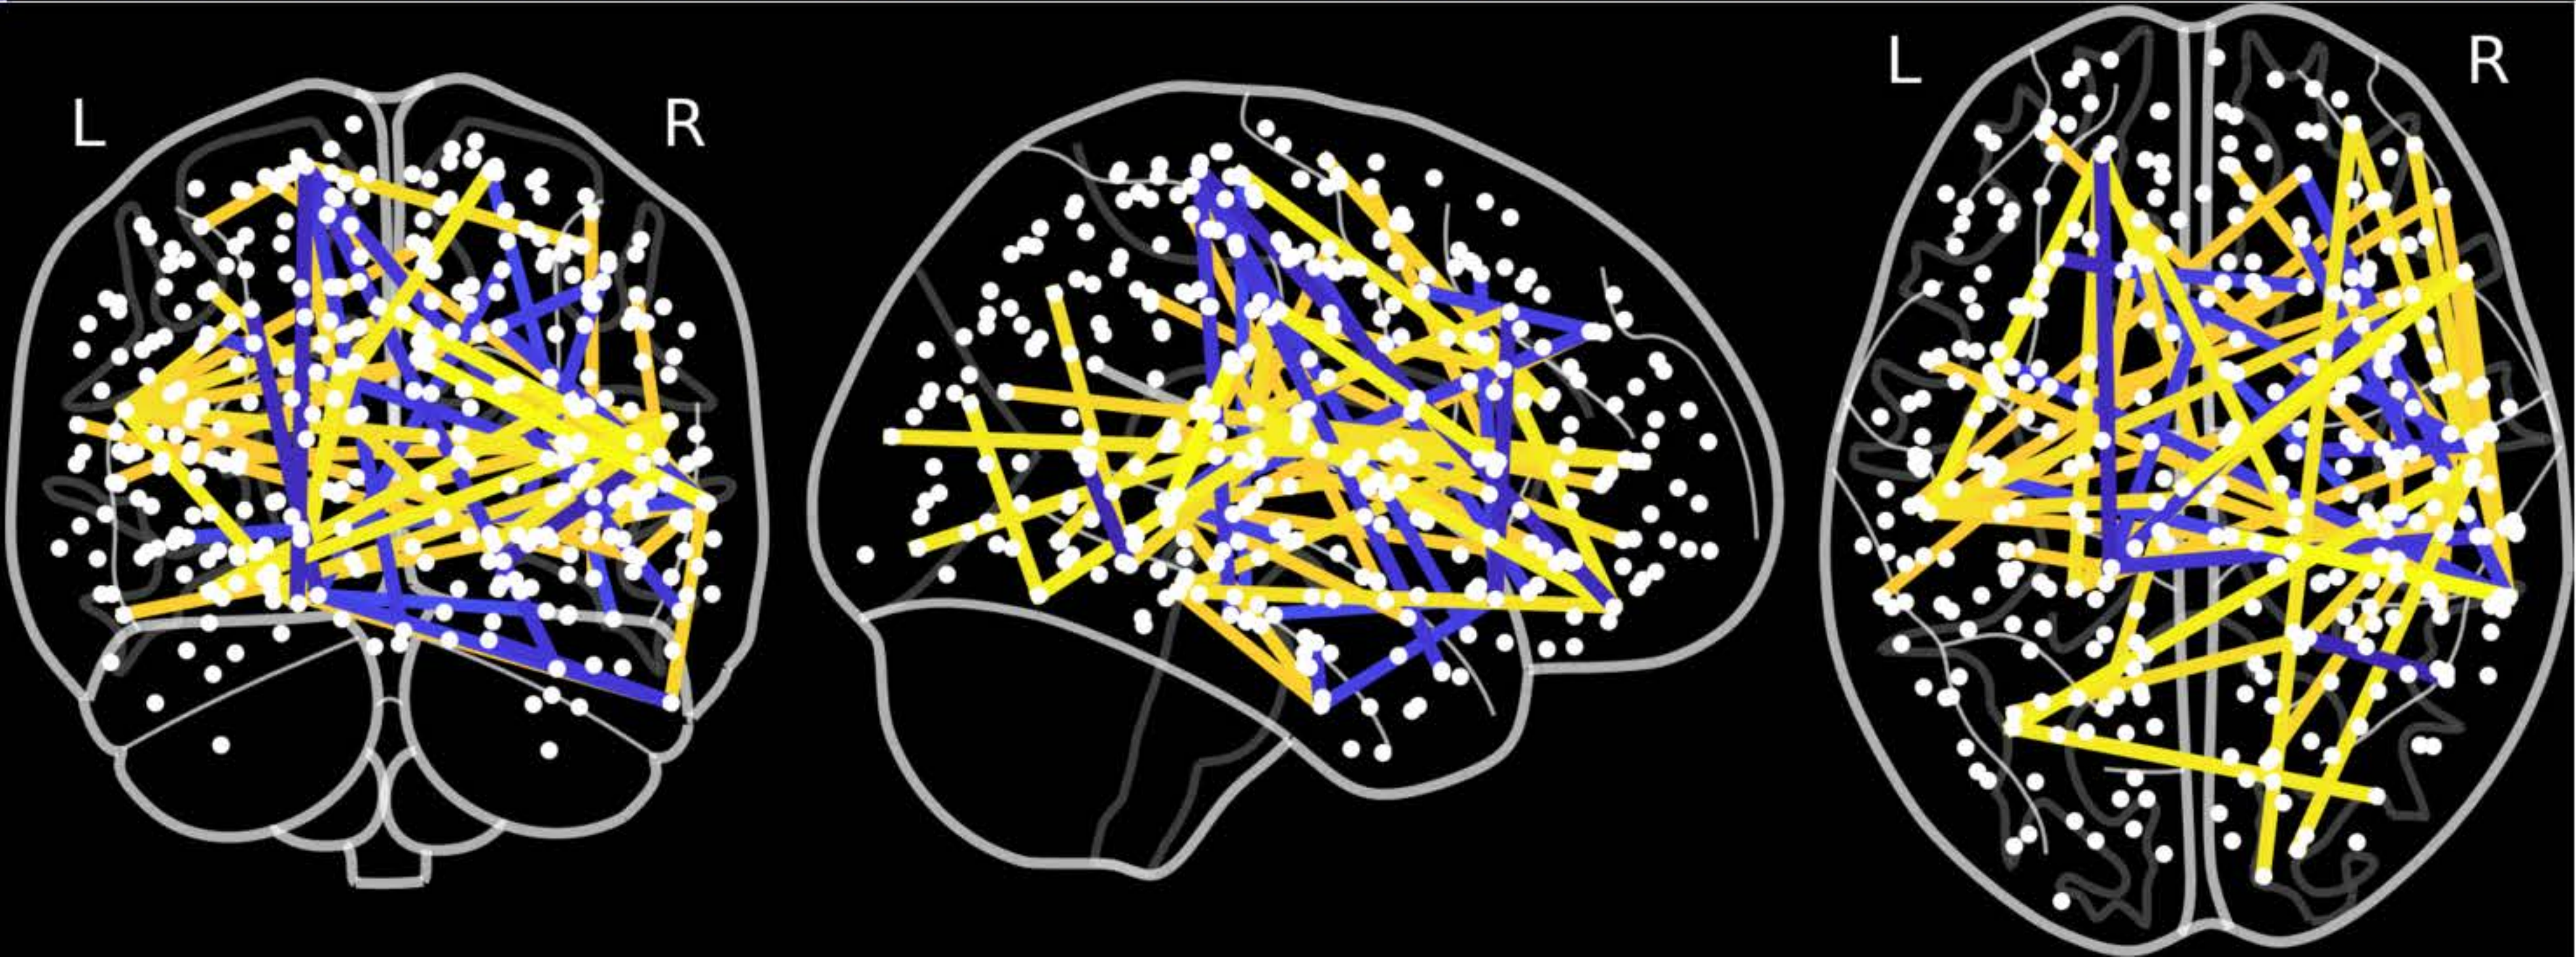



# component\_19

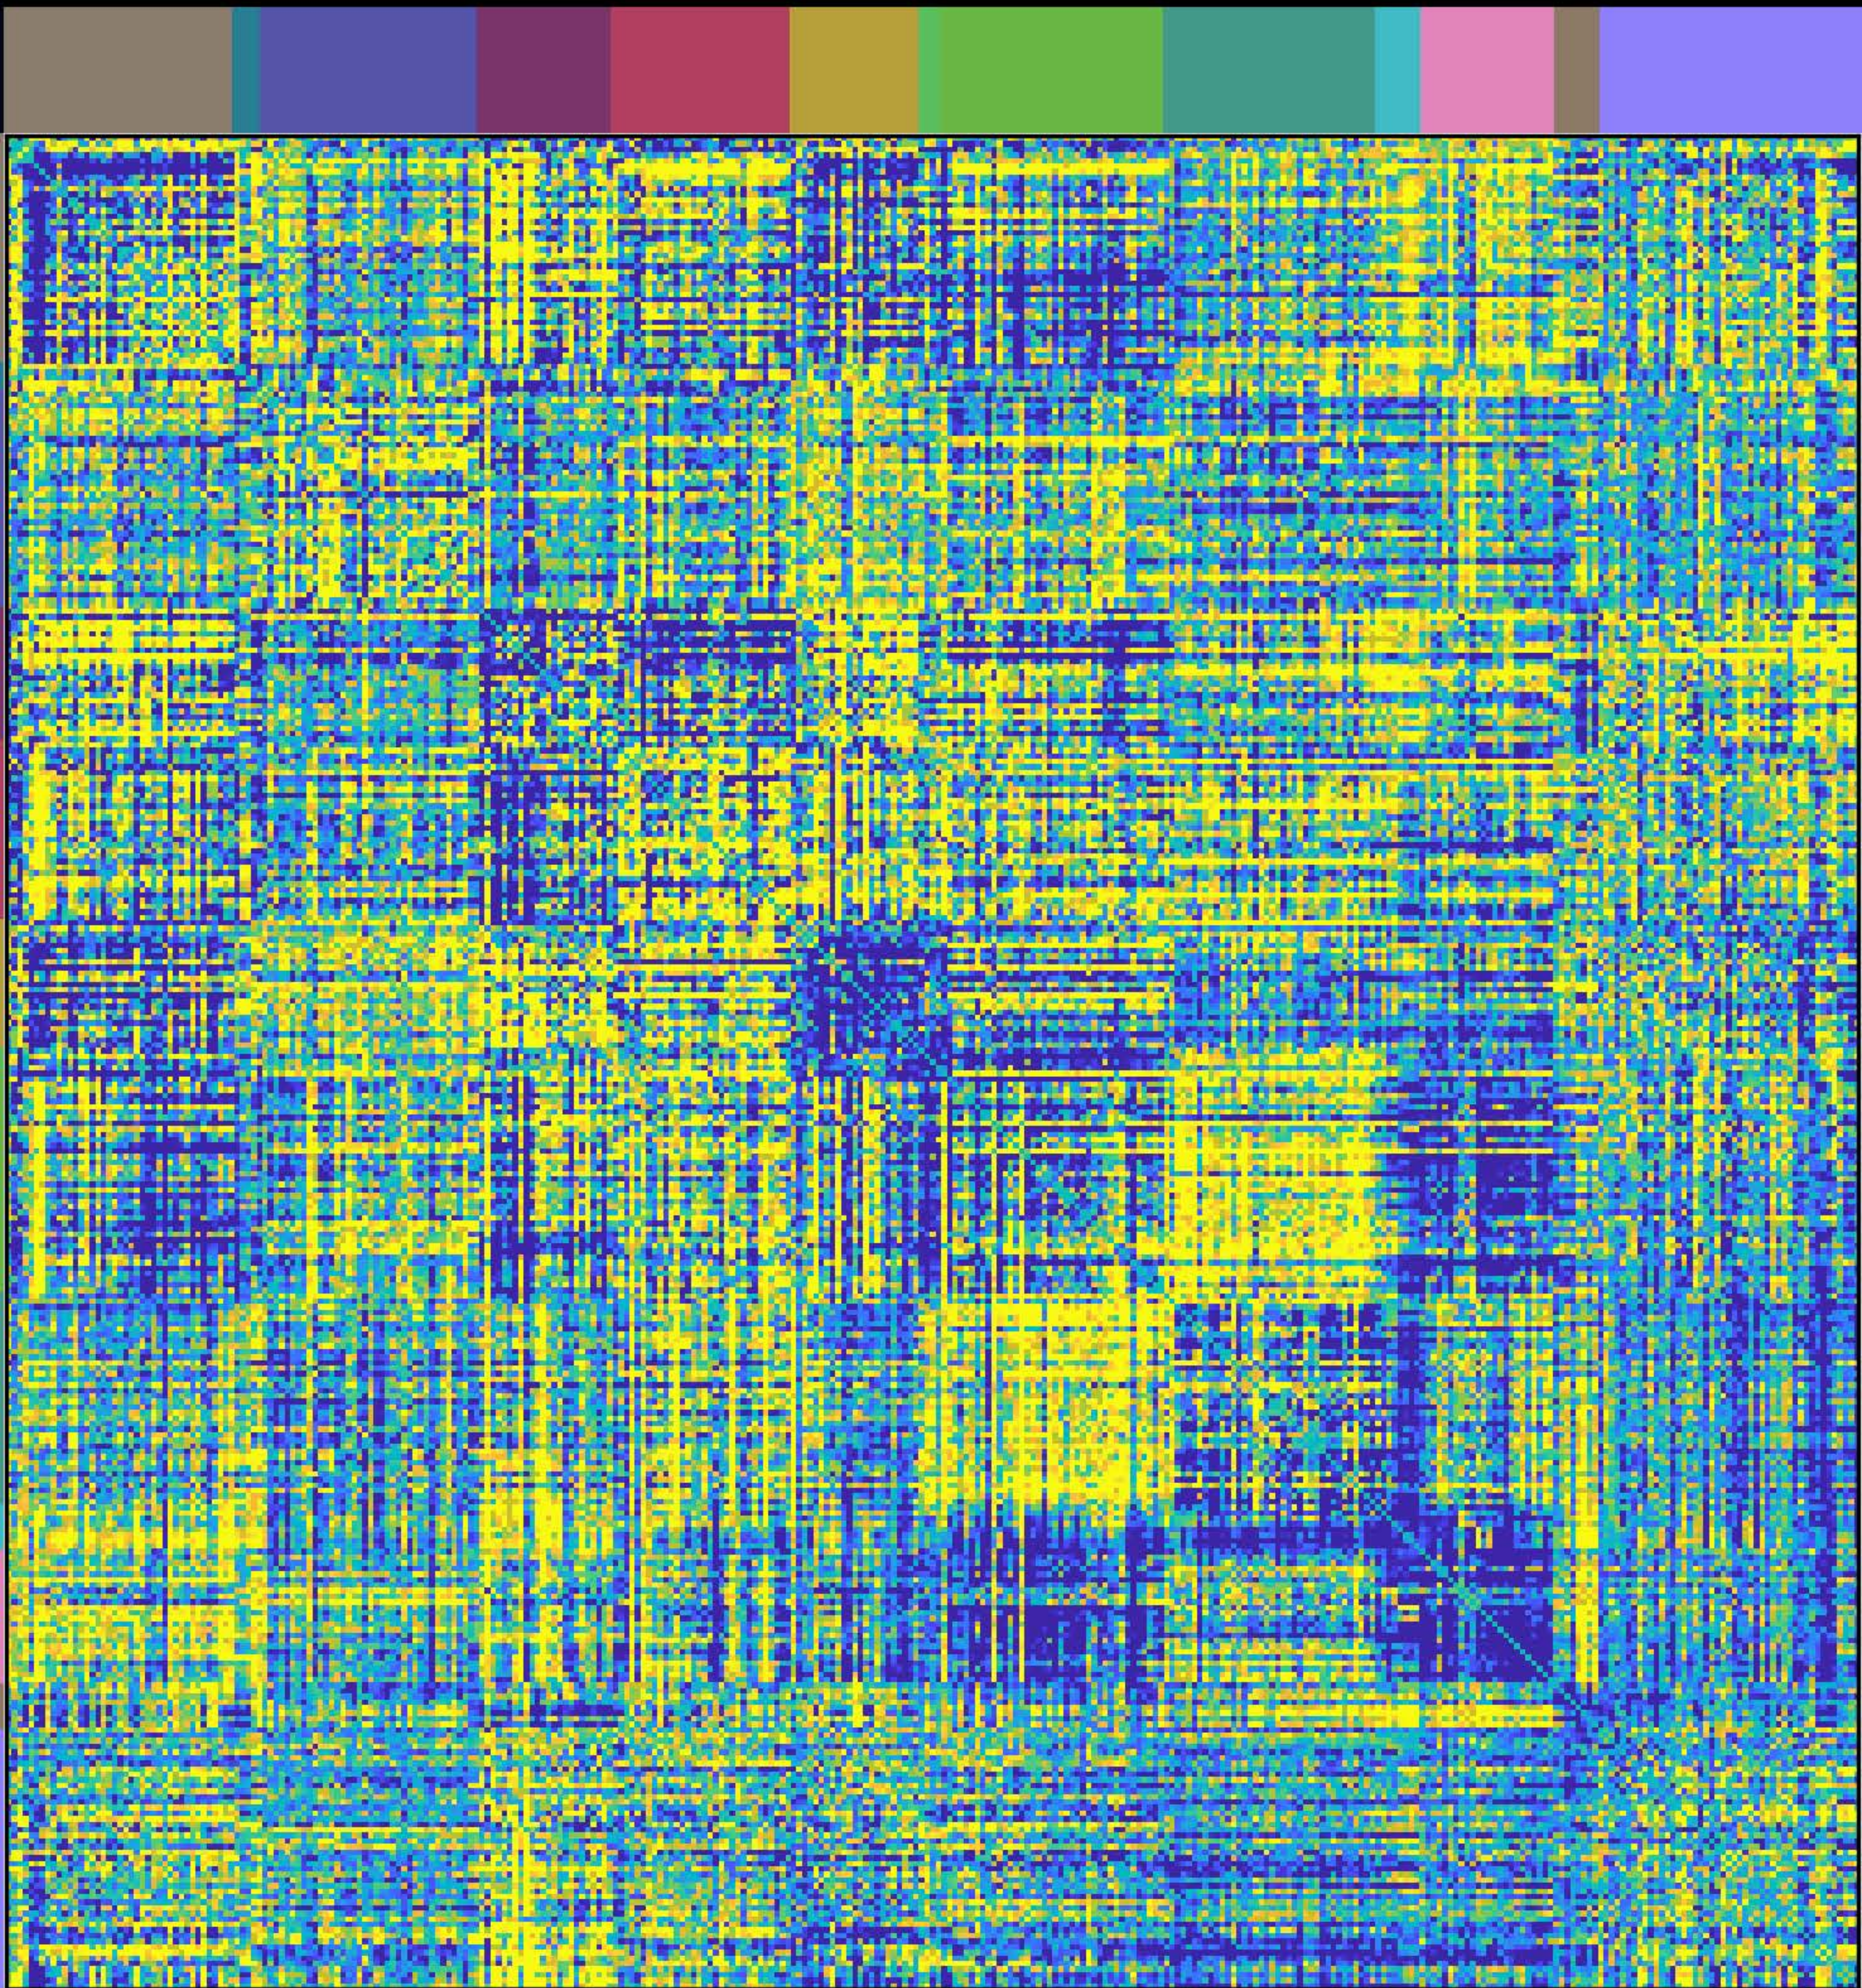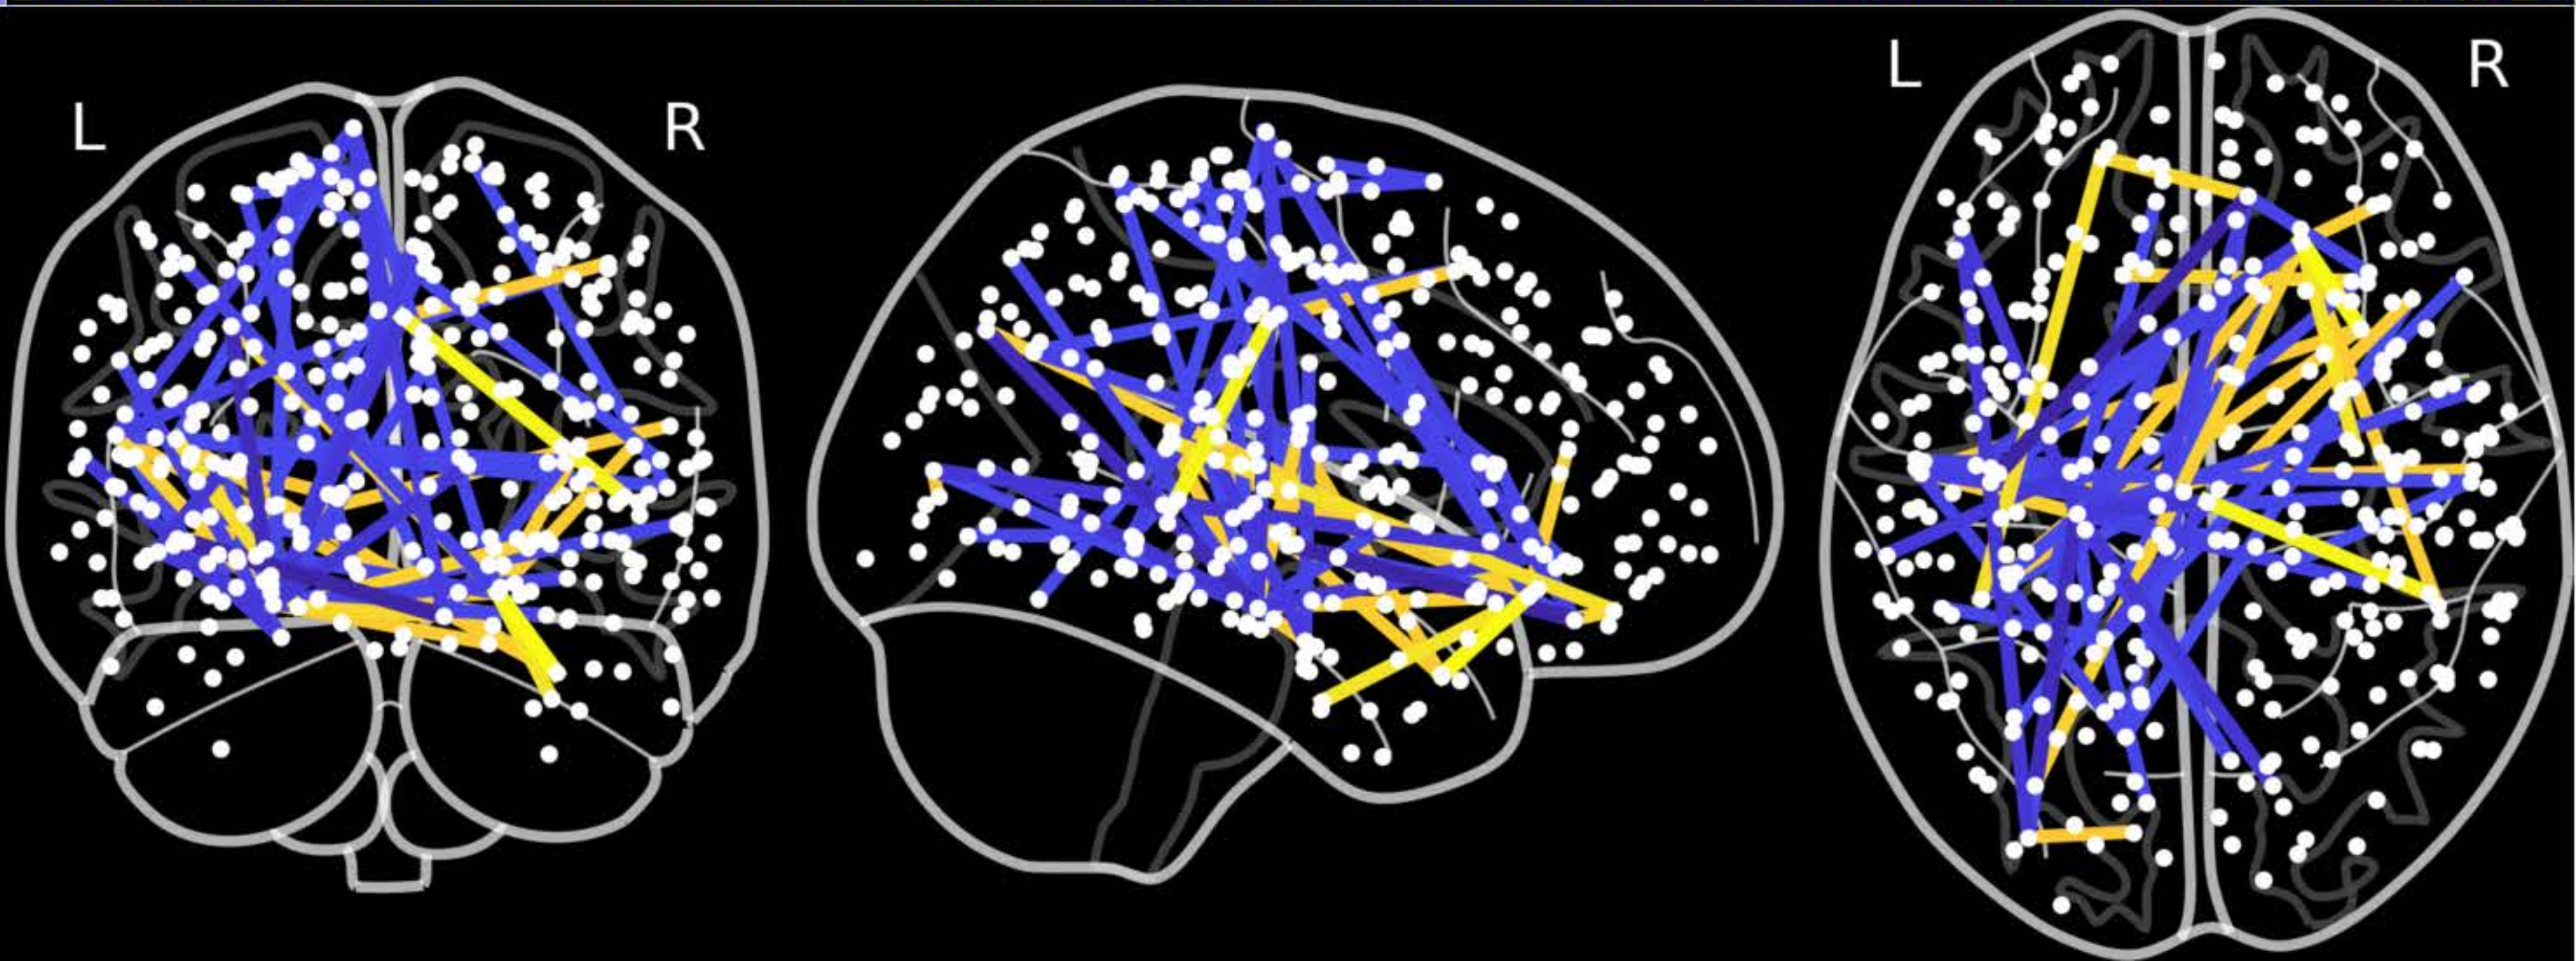



component\_20

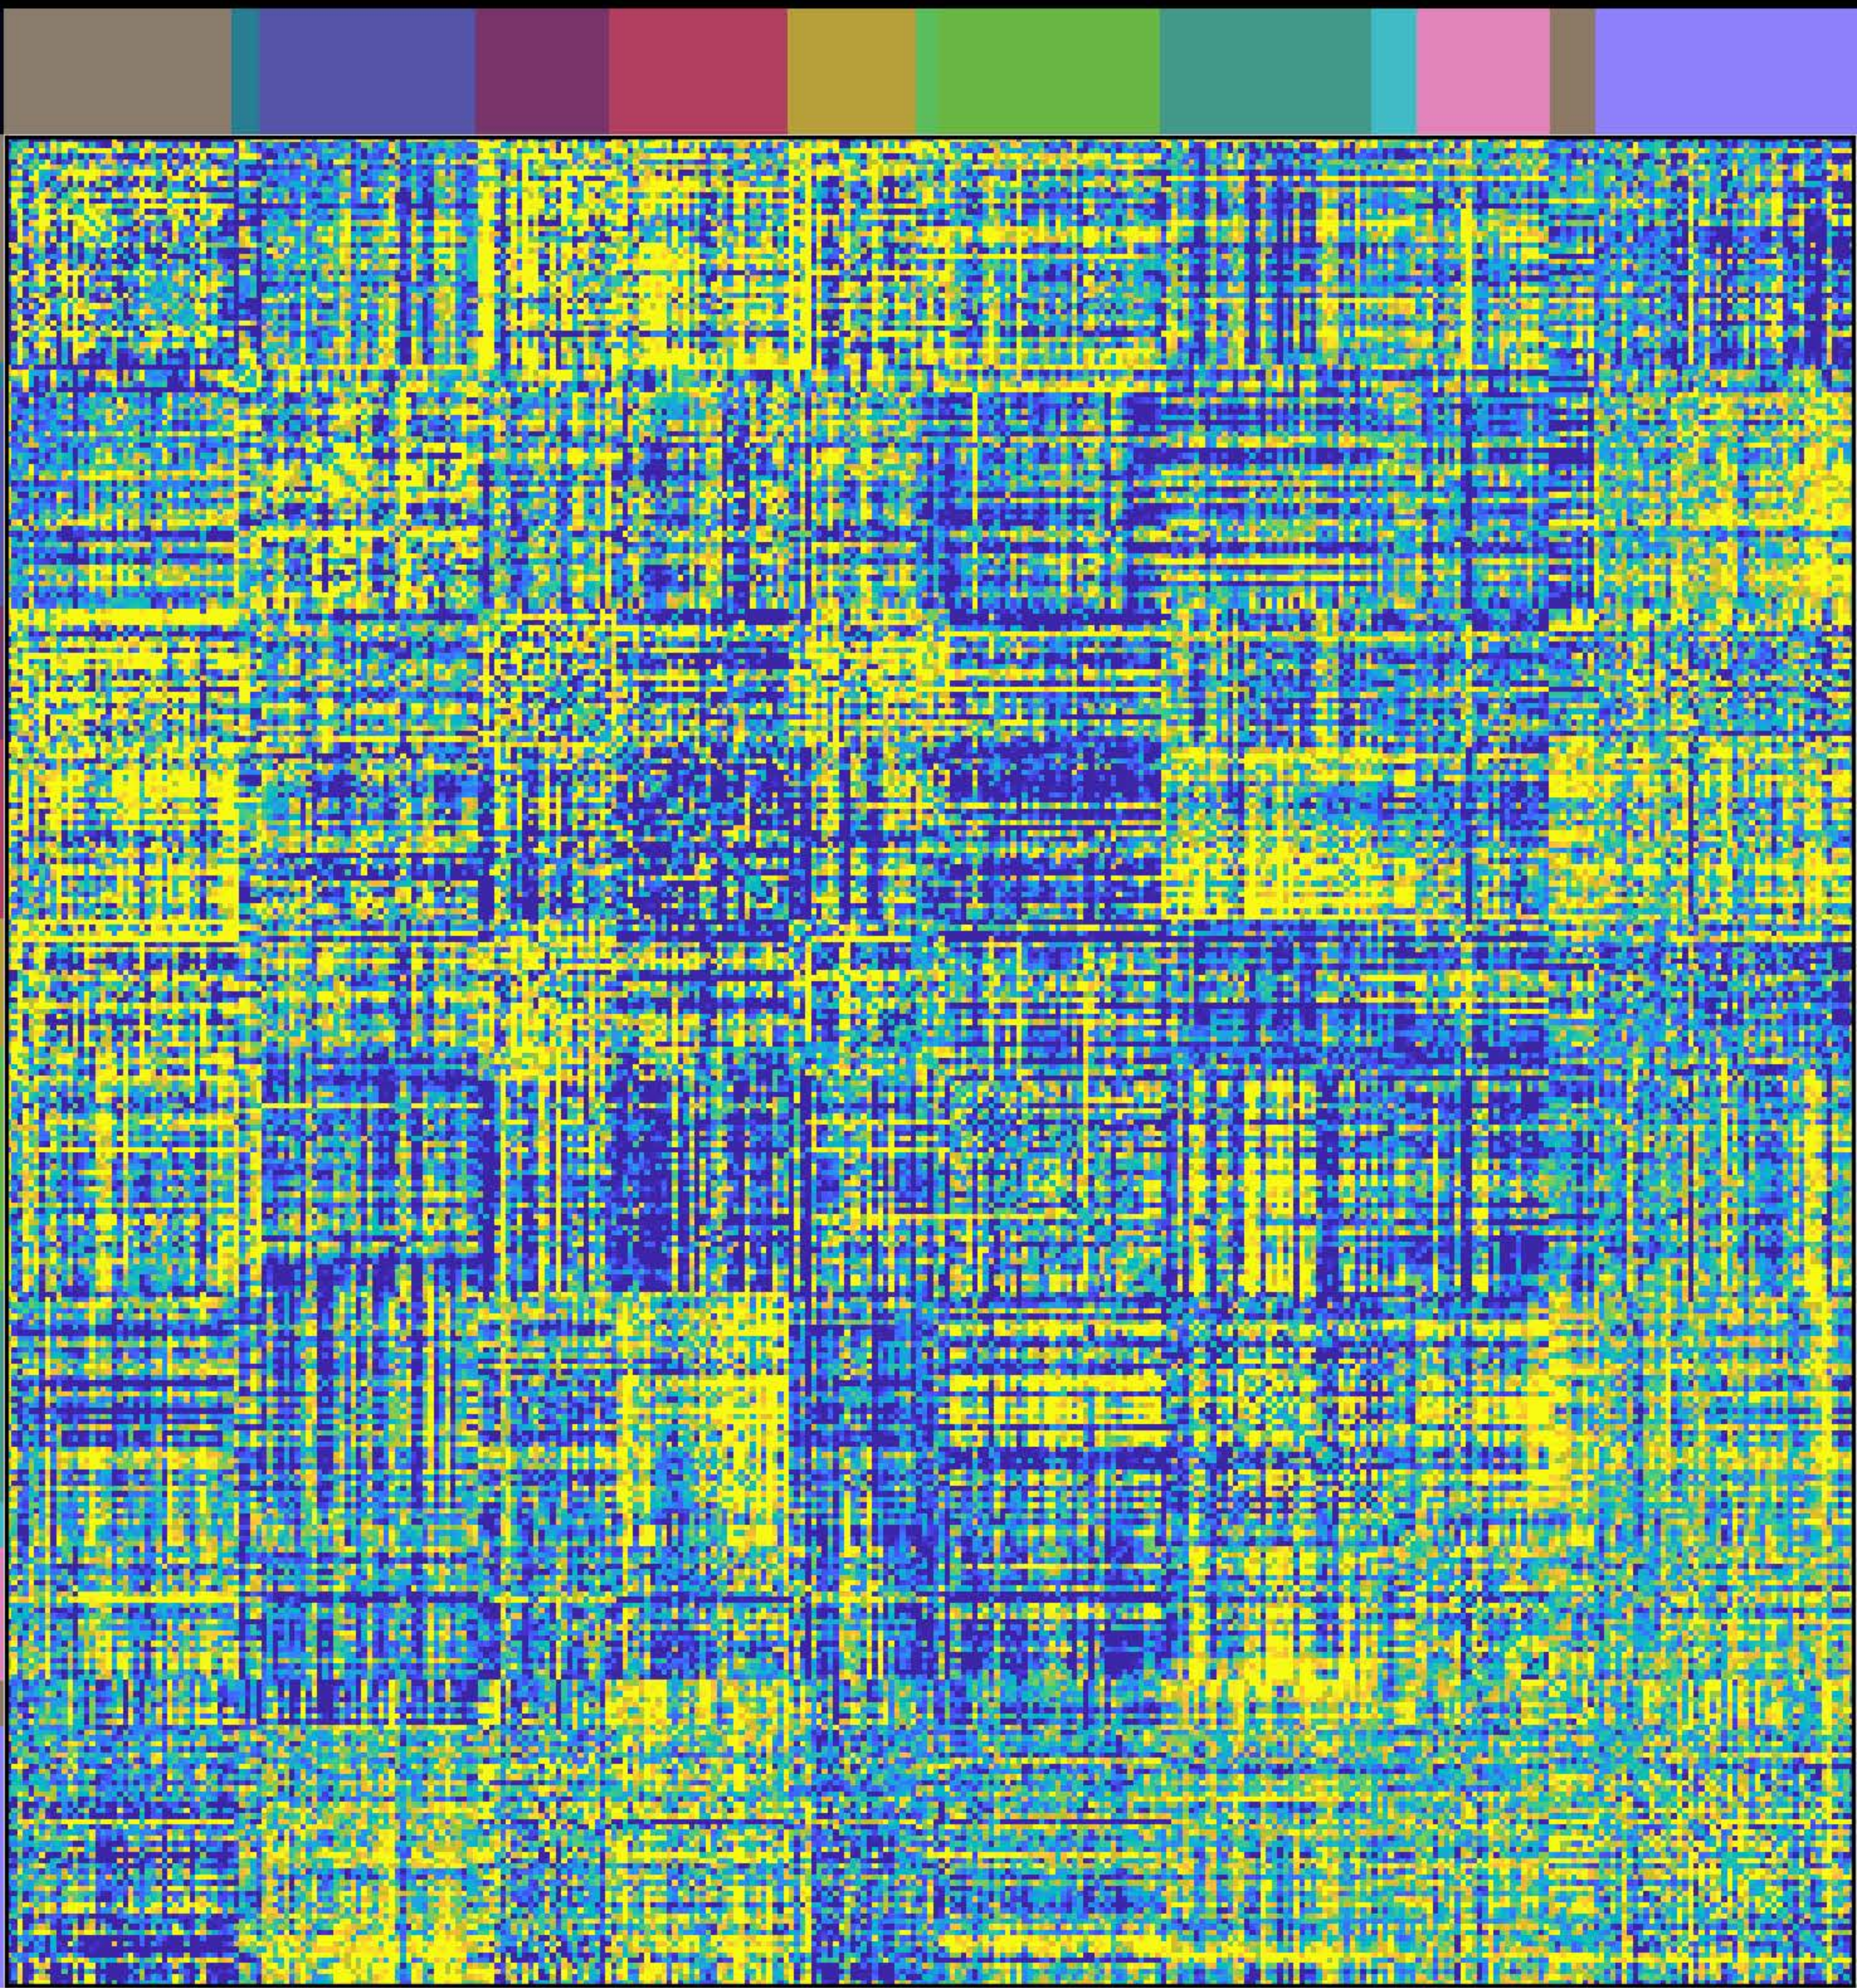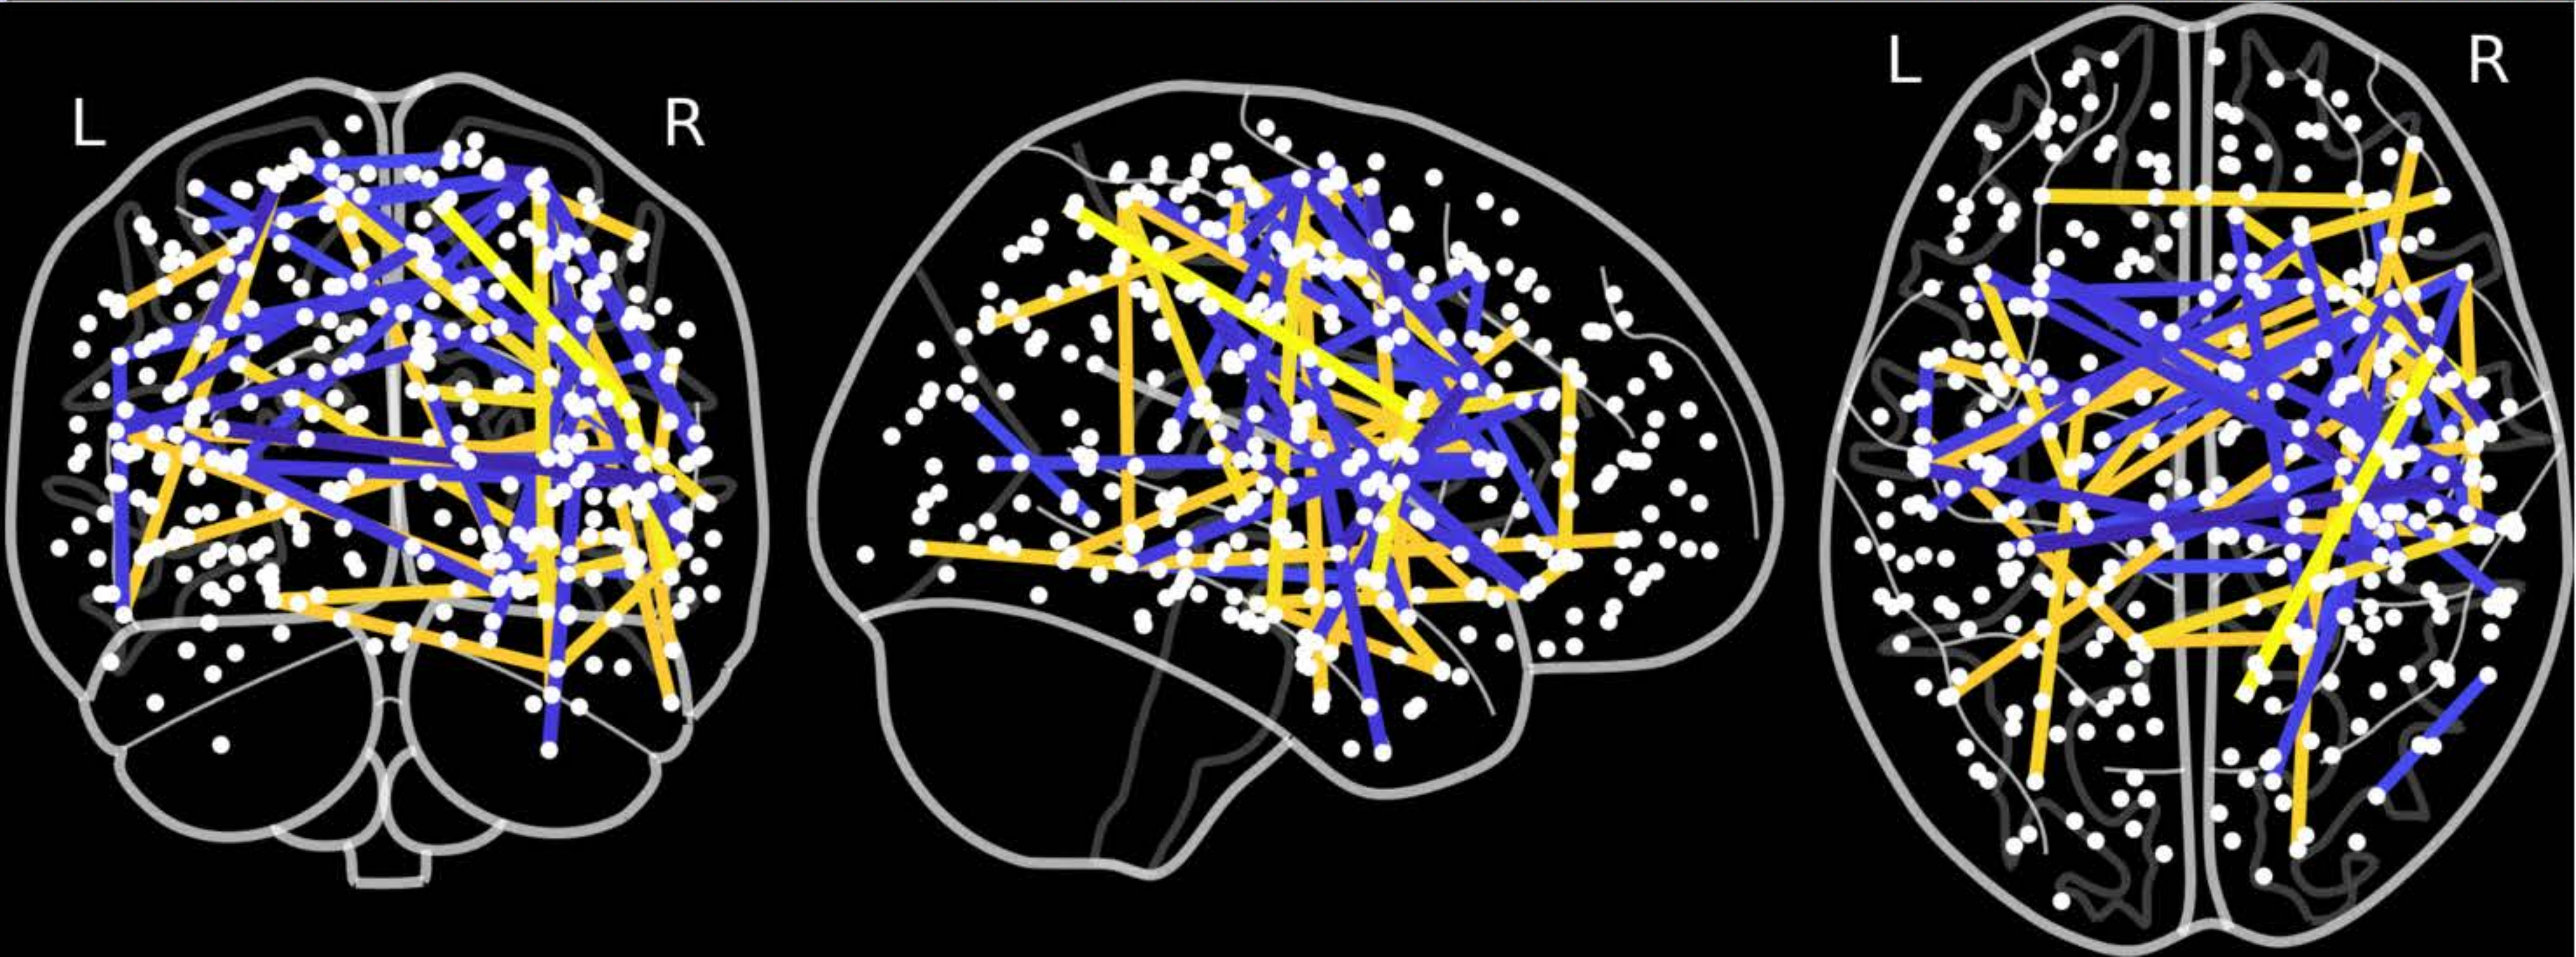



component\_21

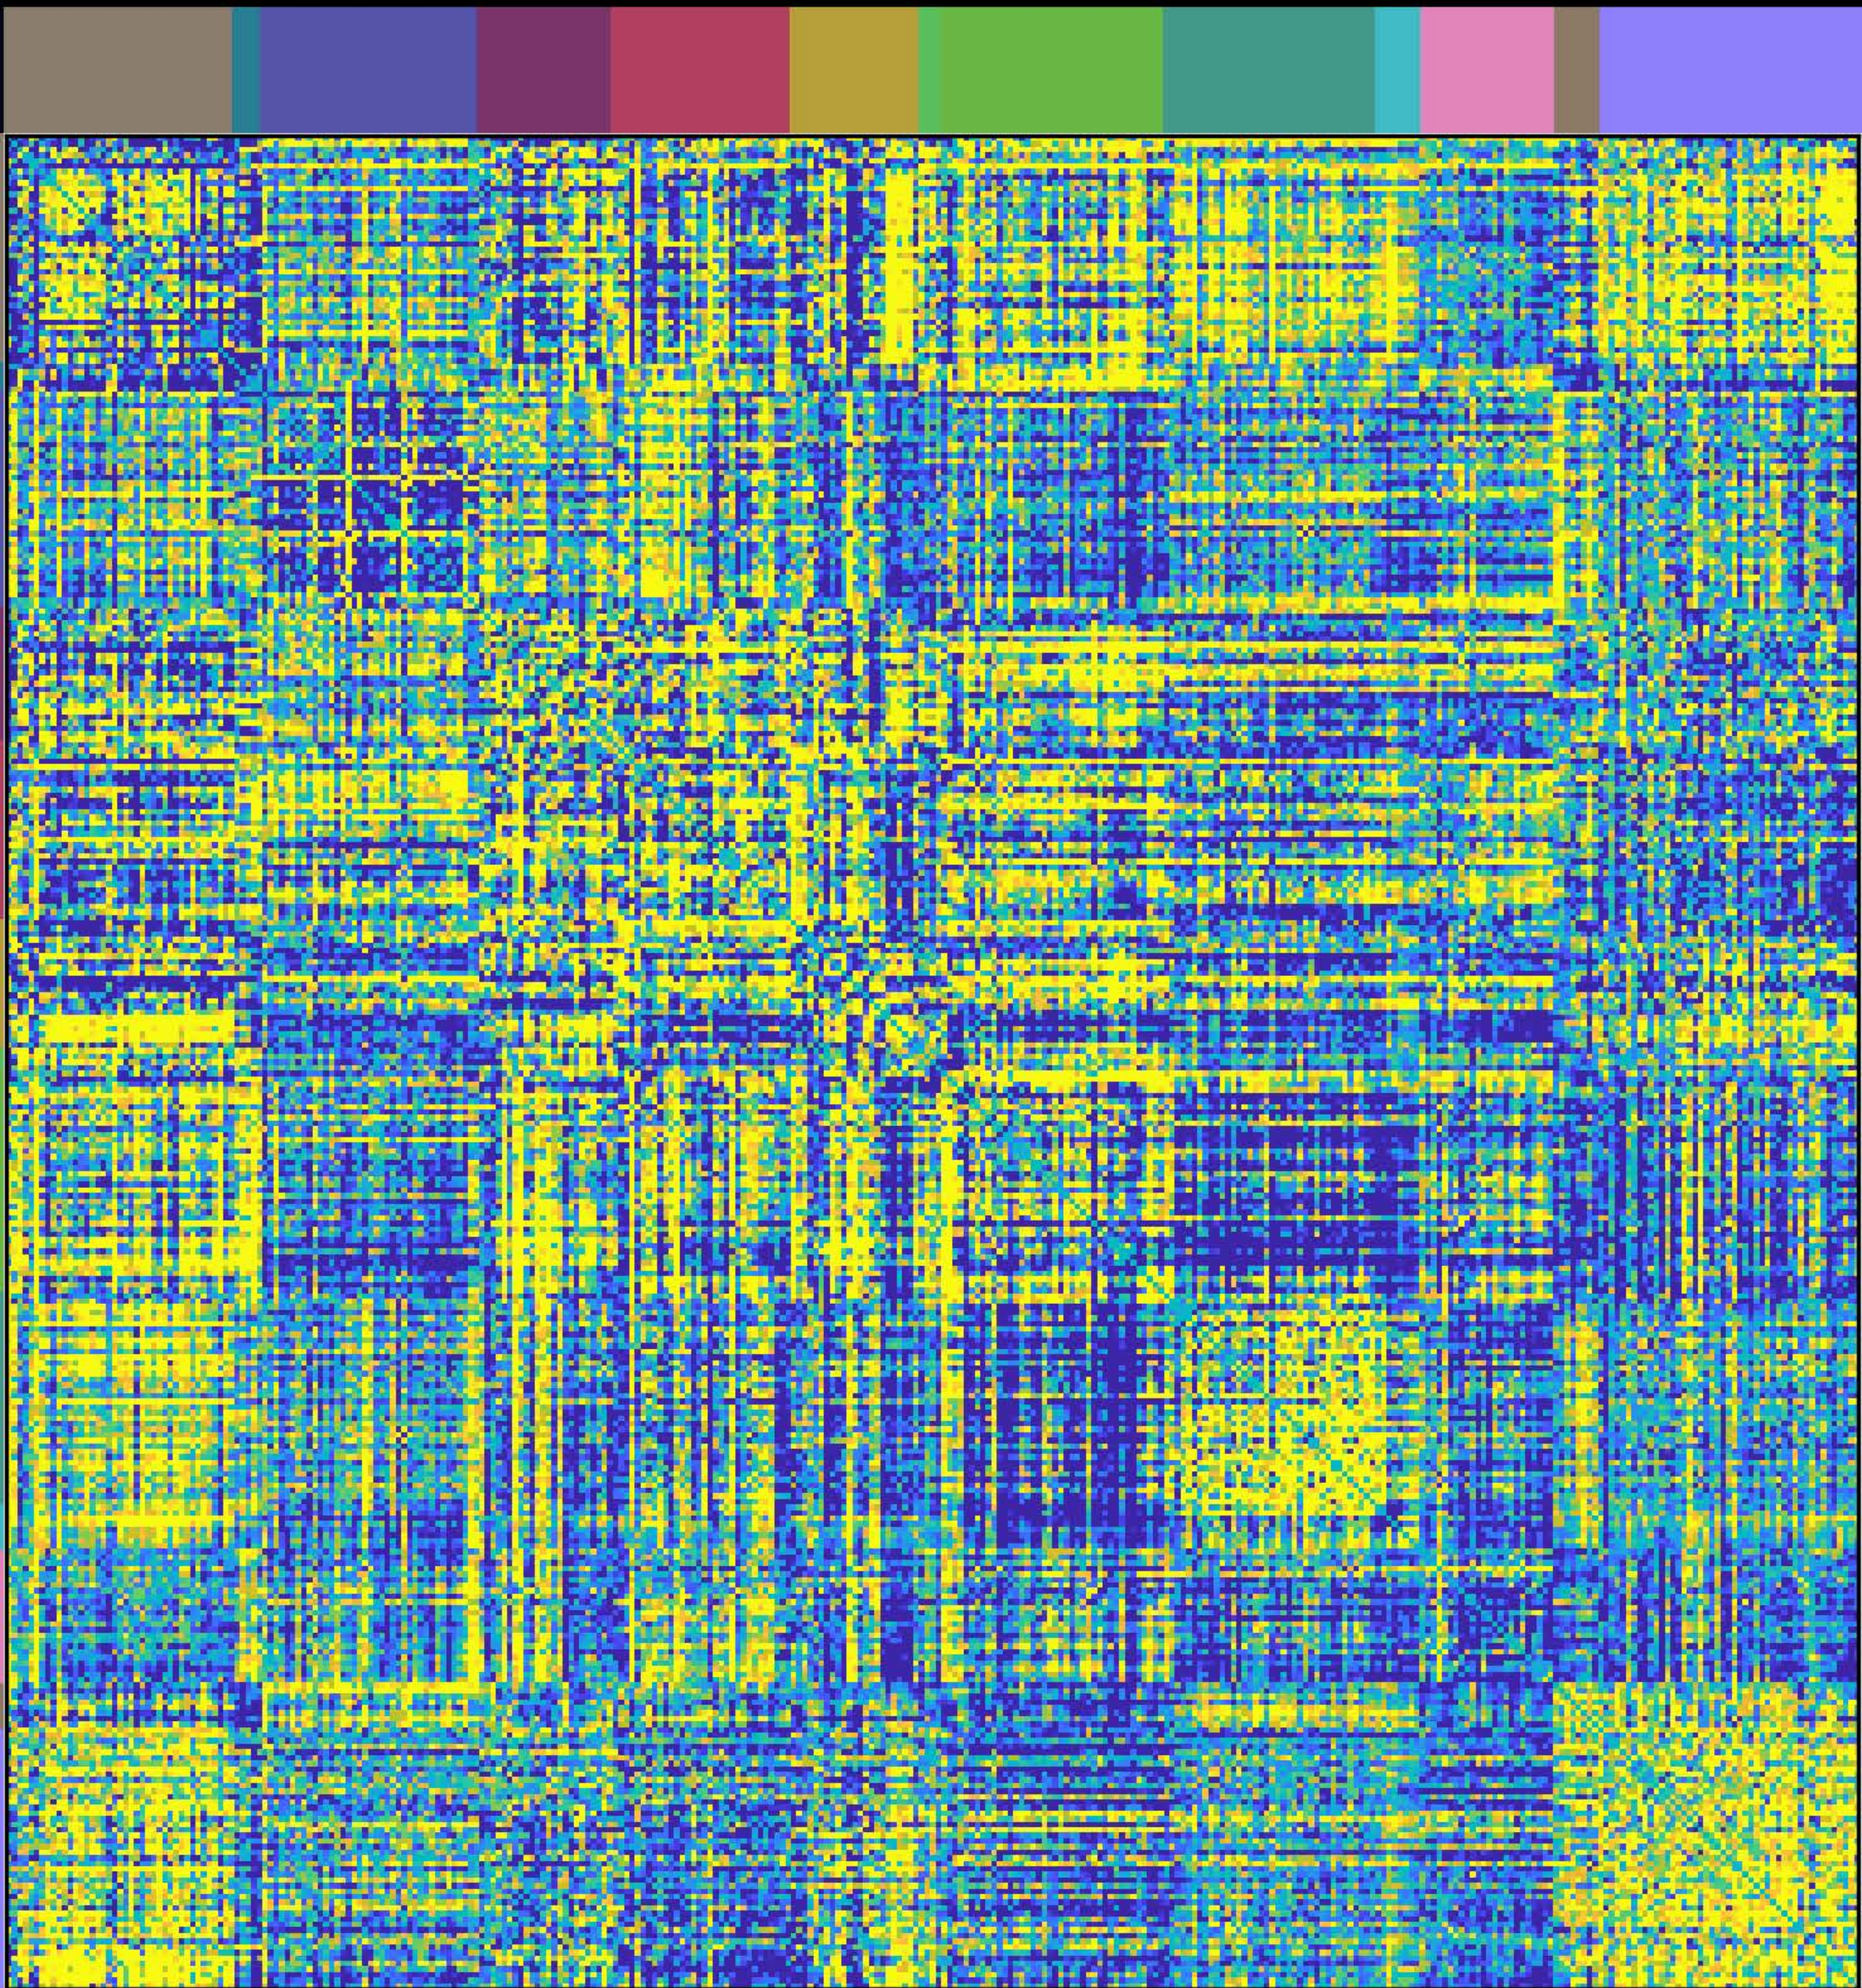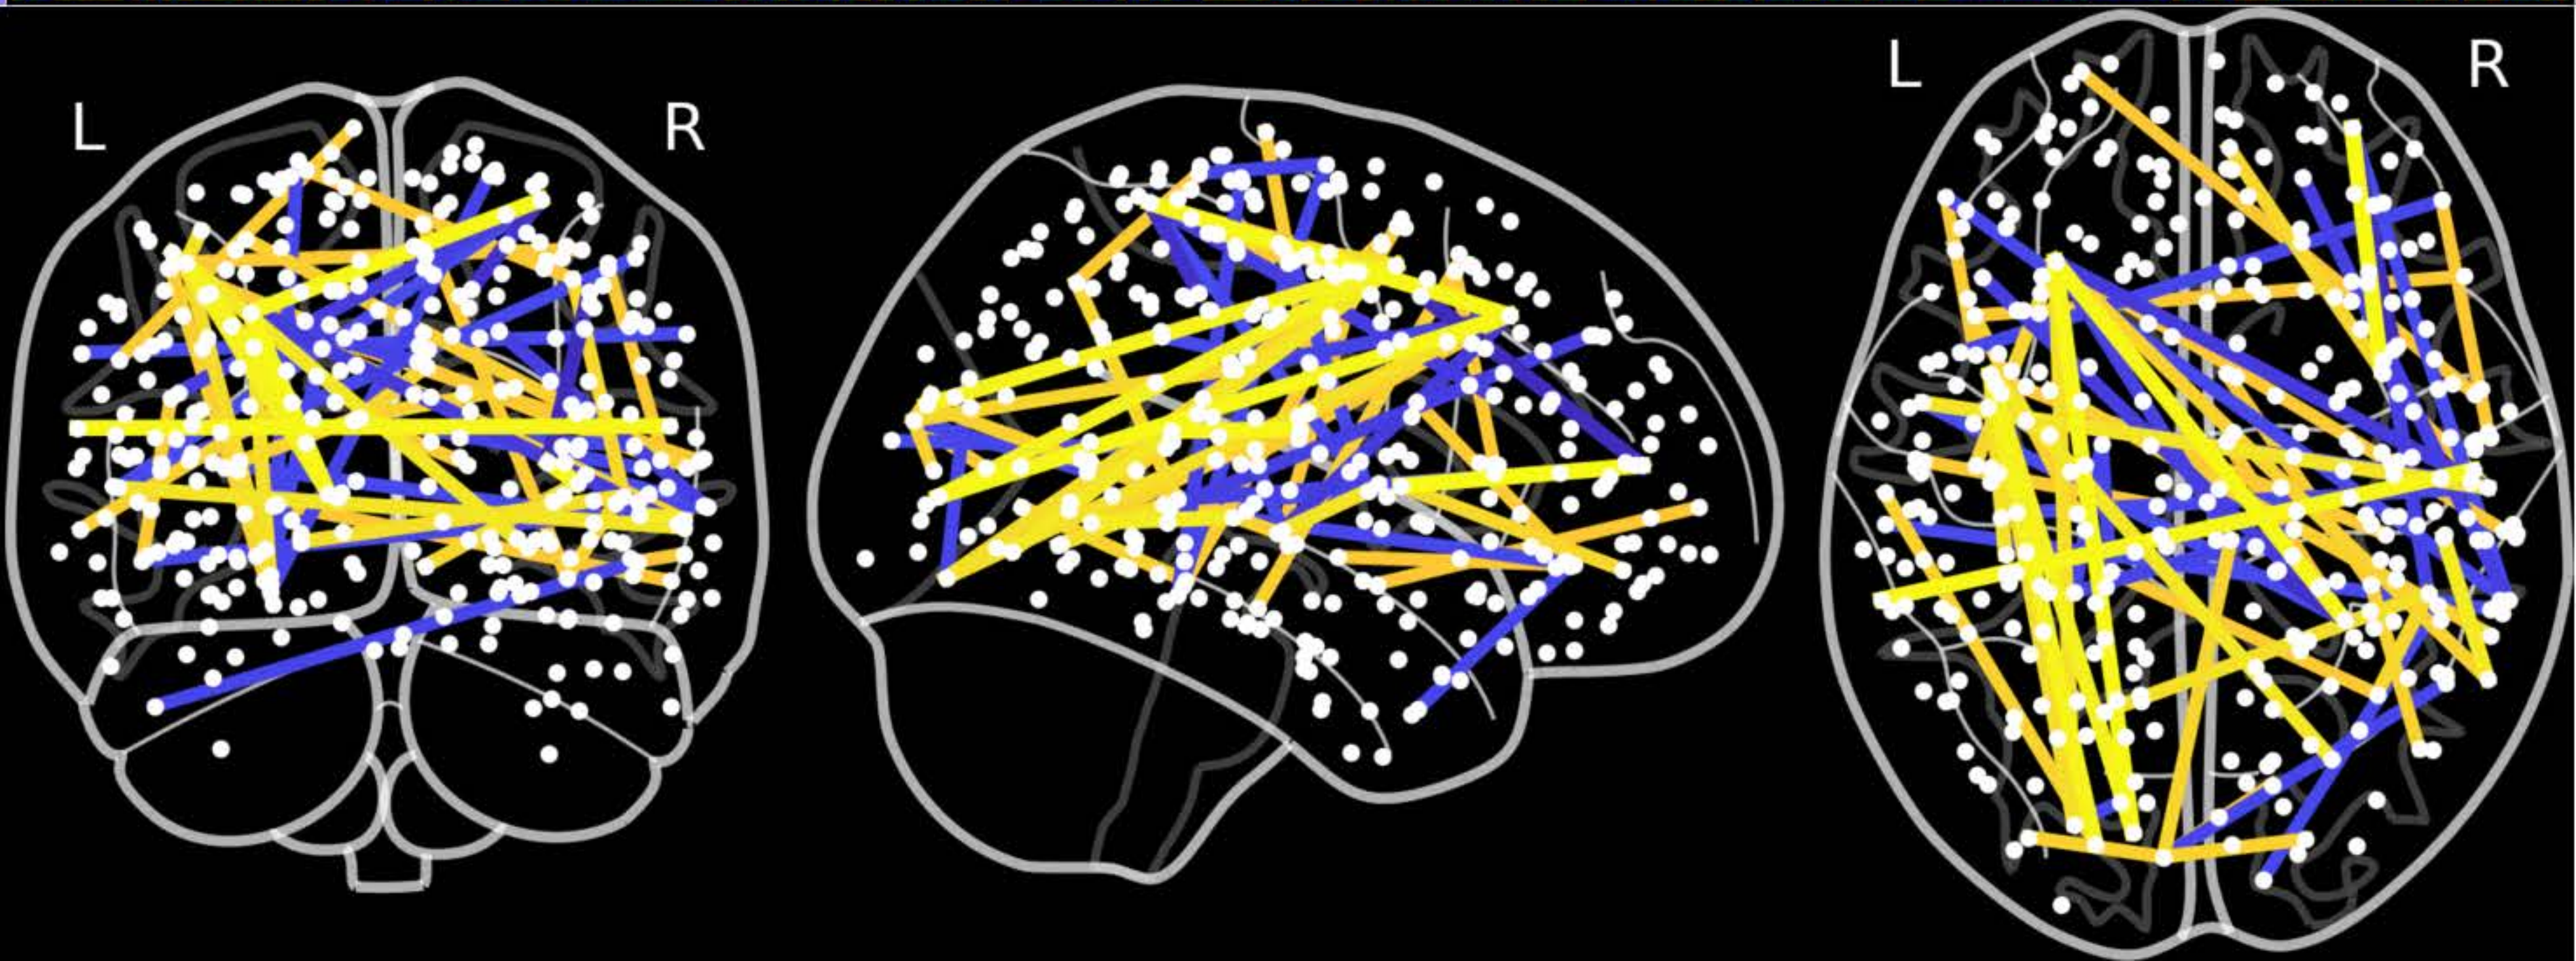



component\_22

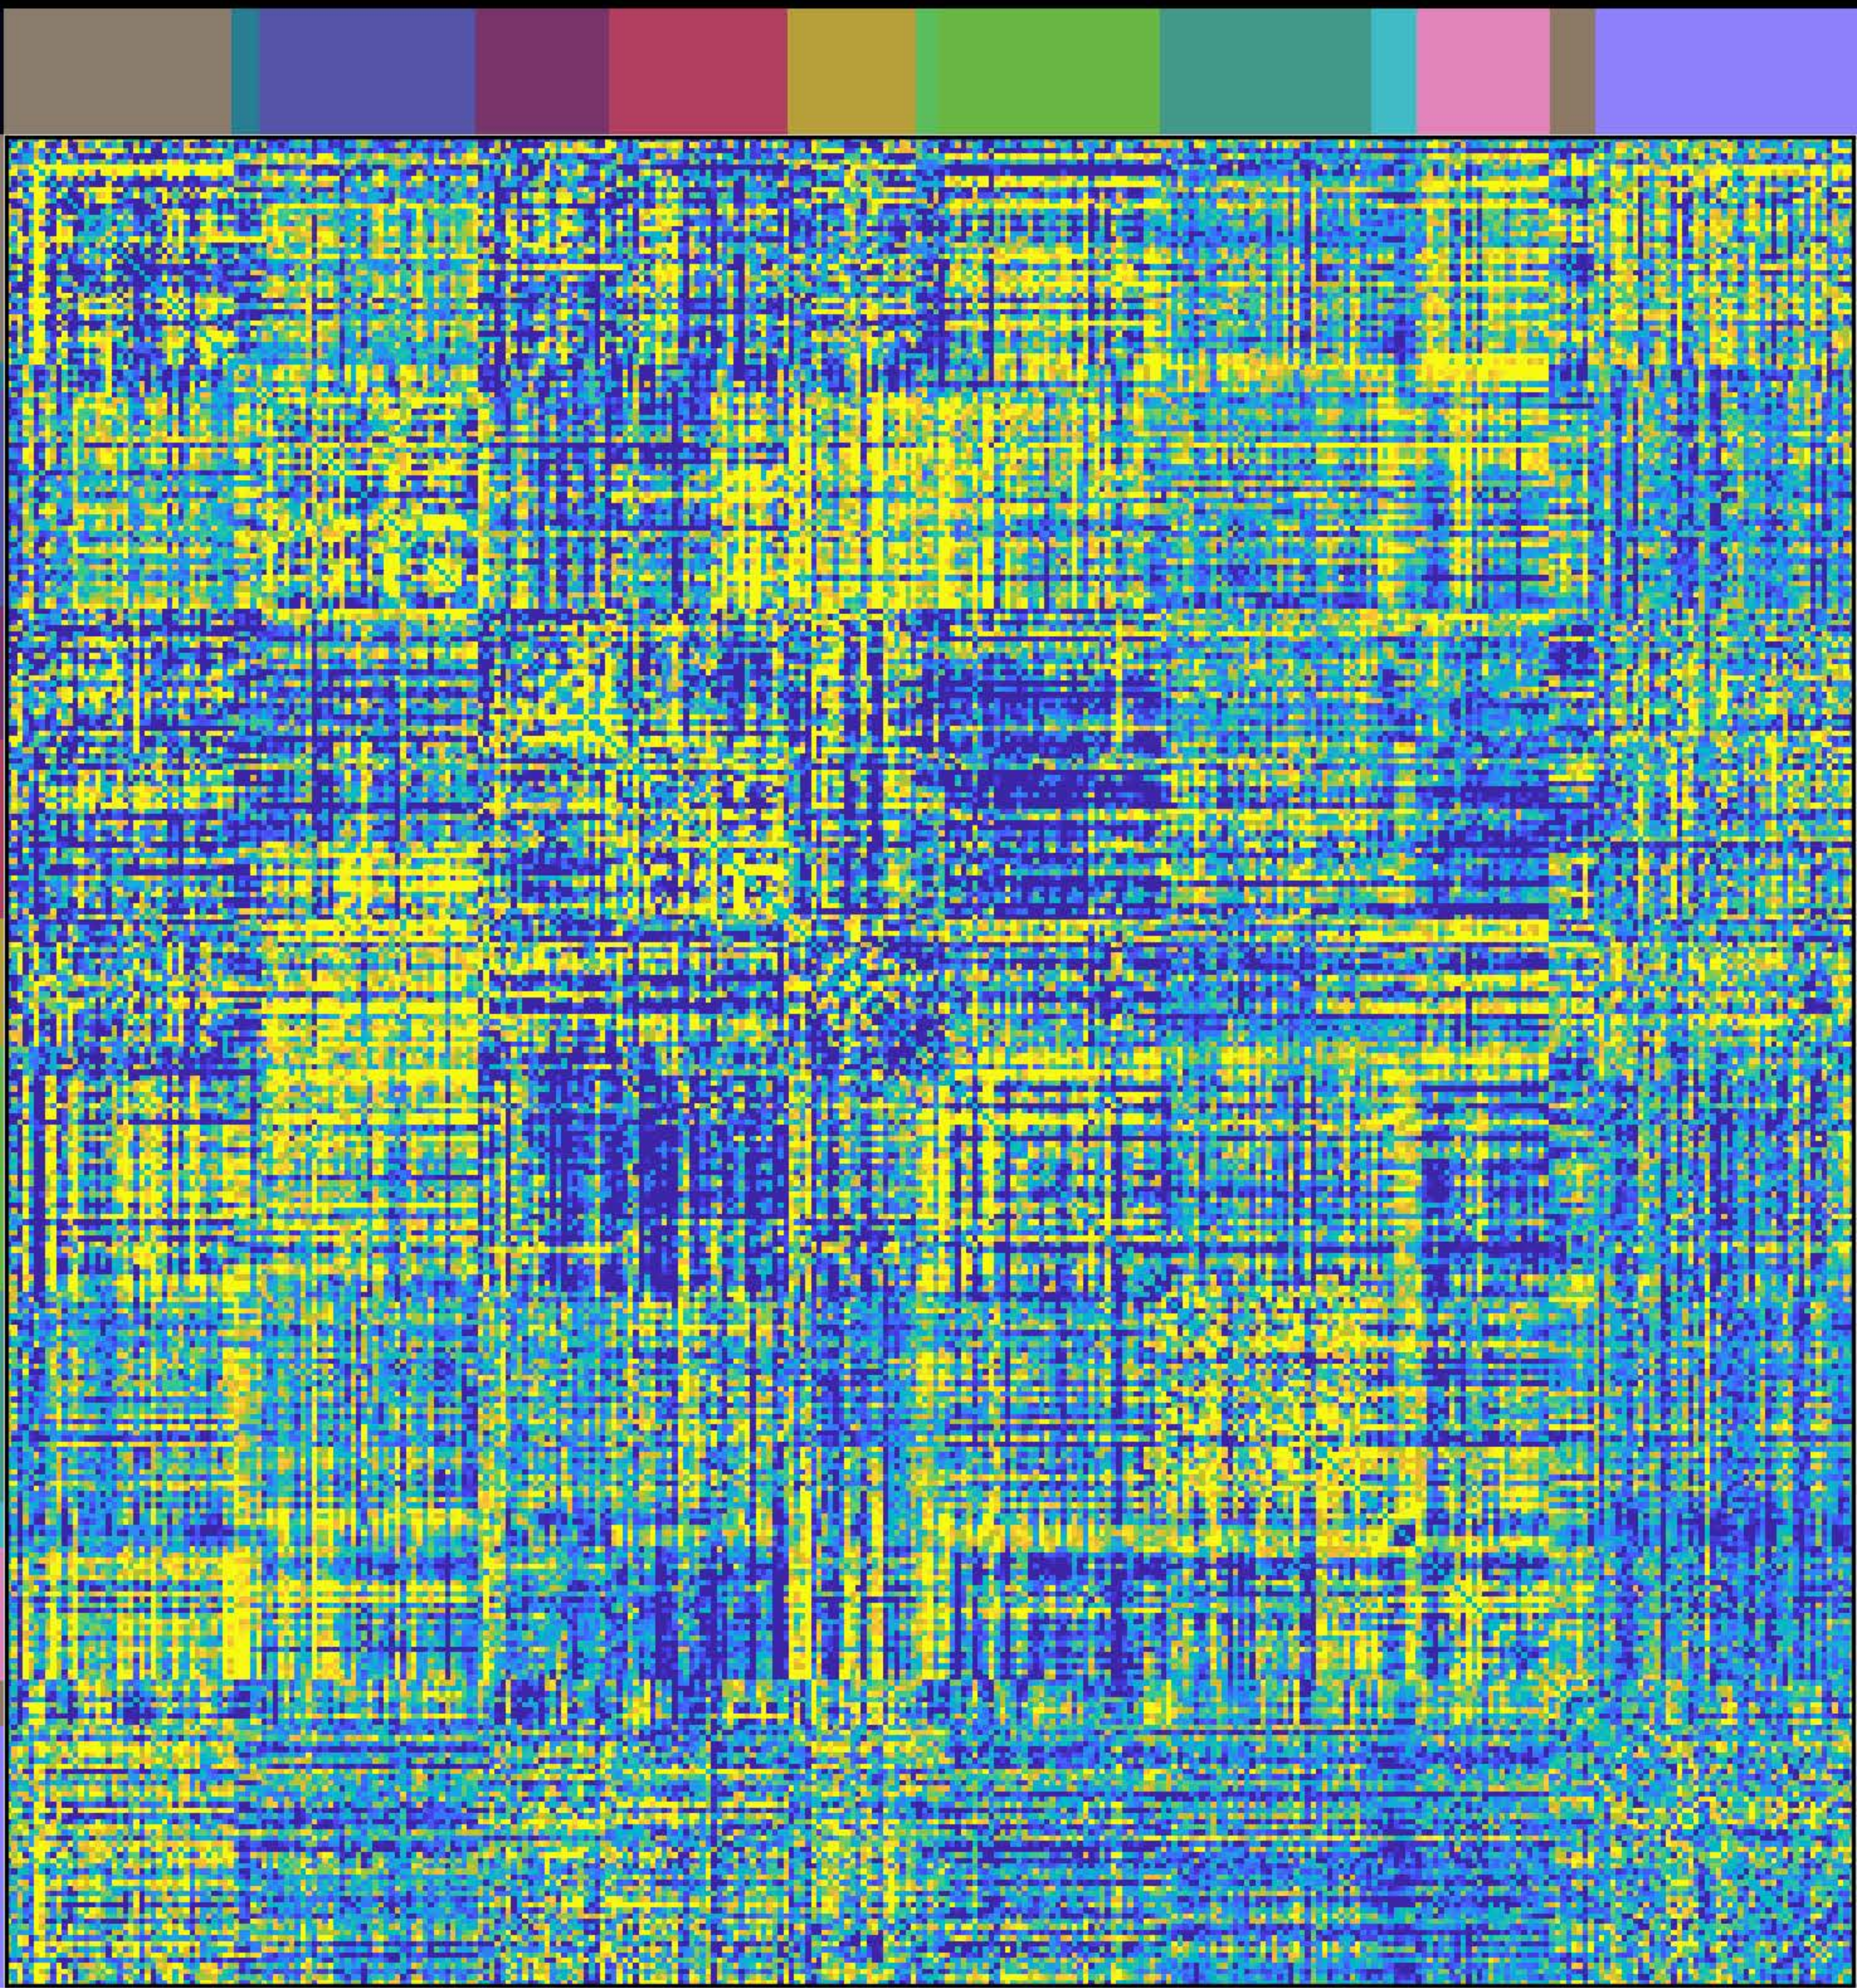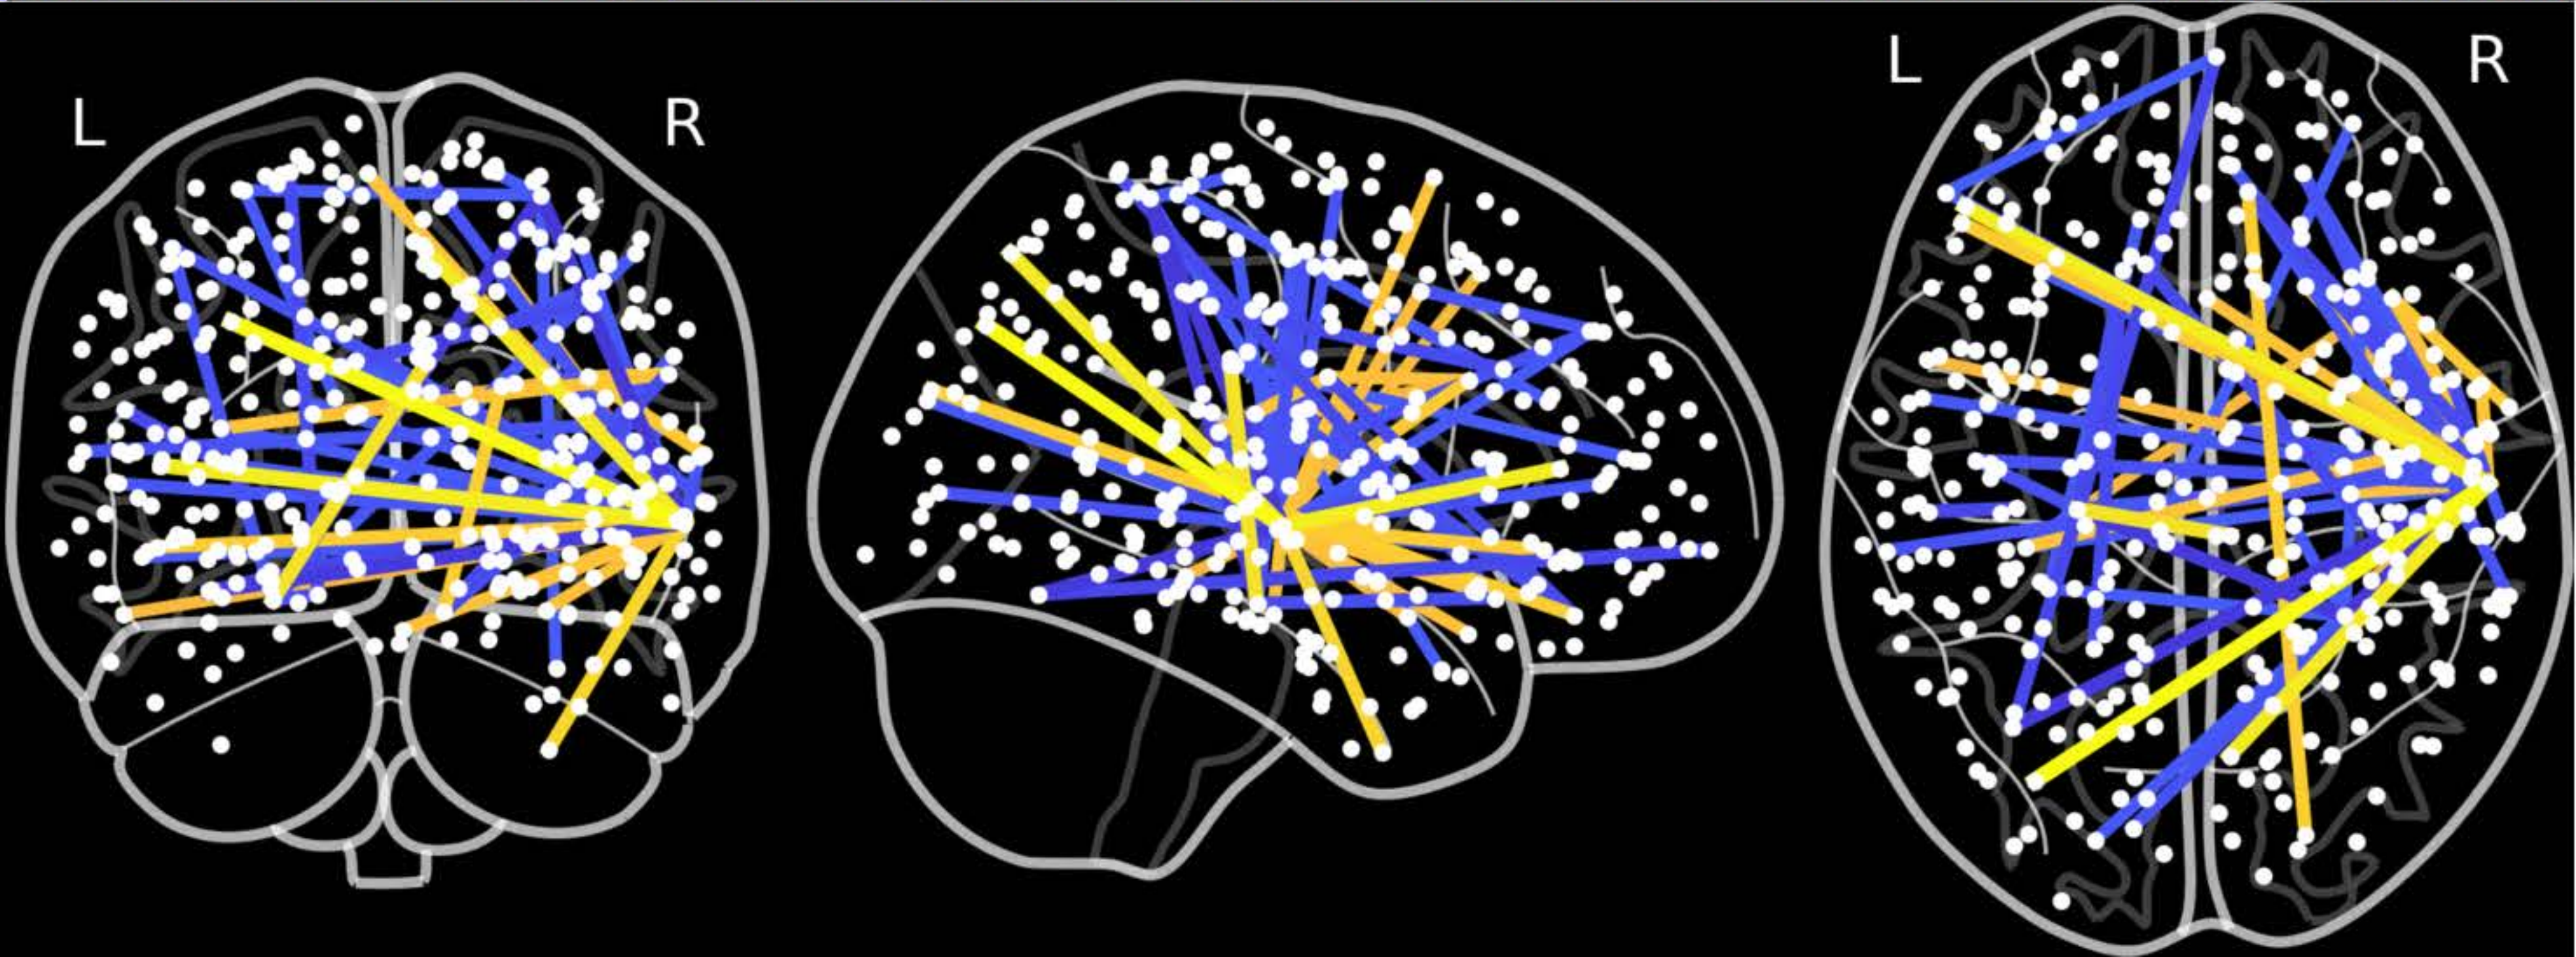



component\_23

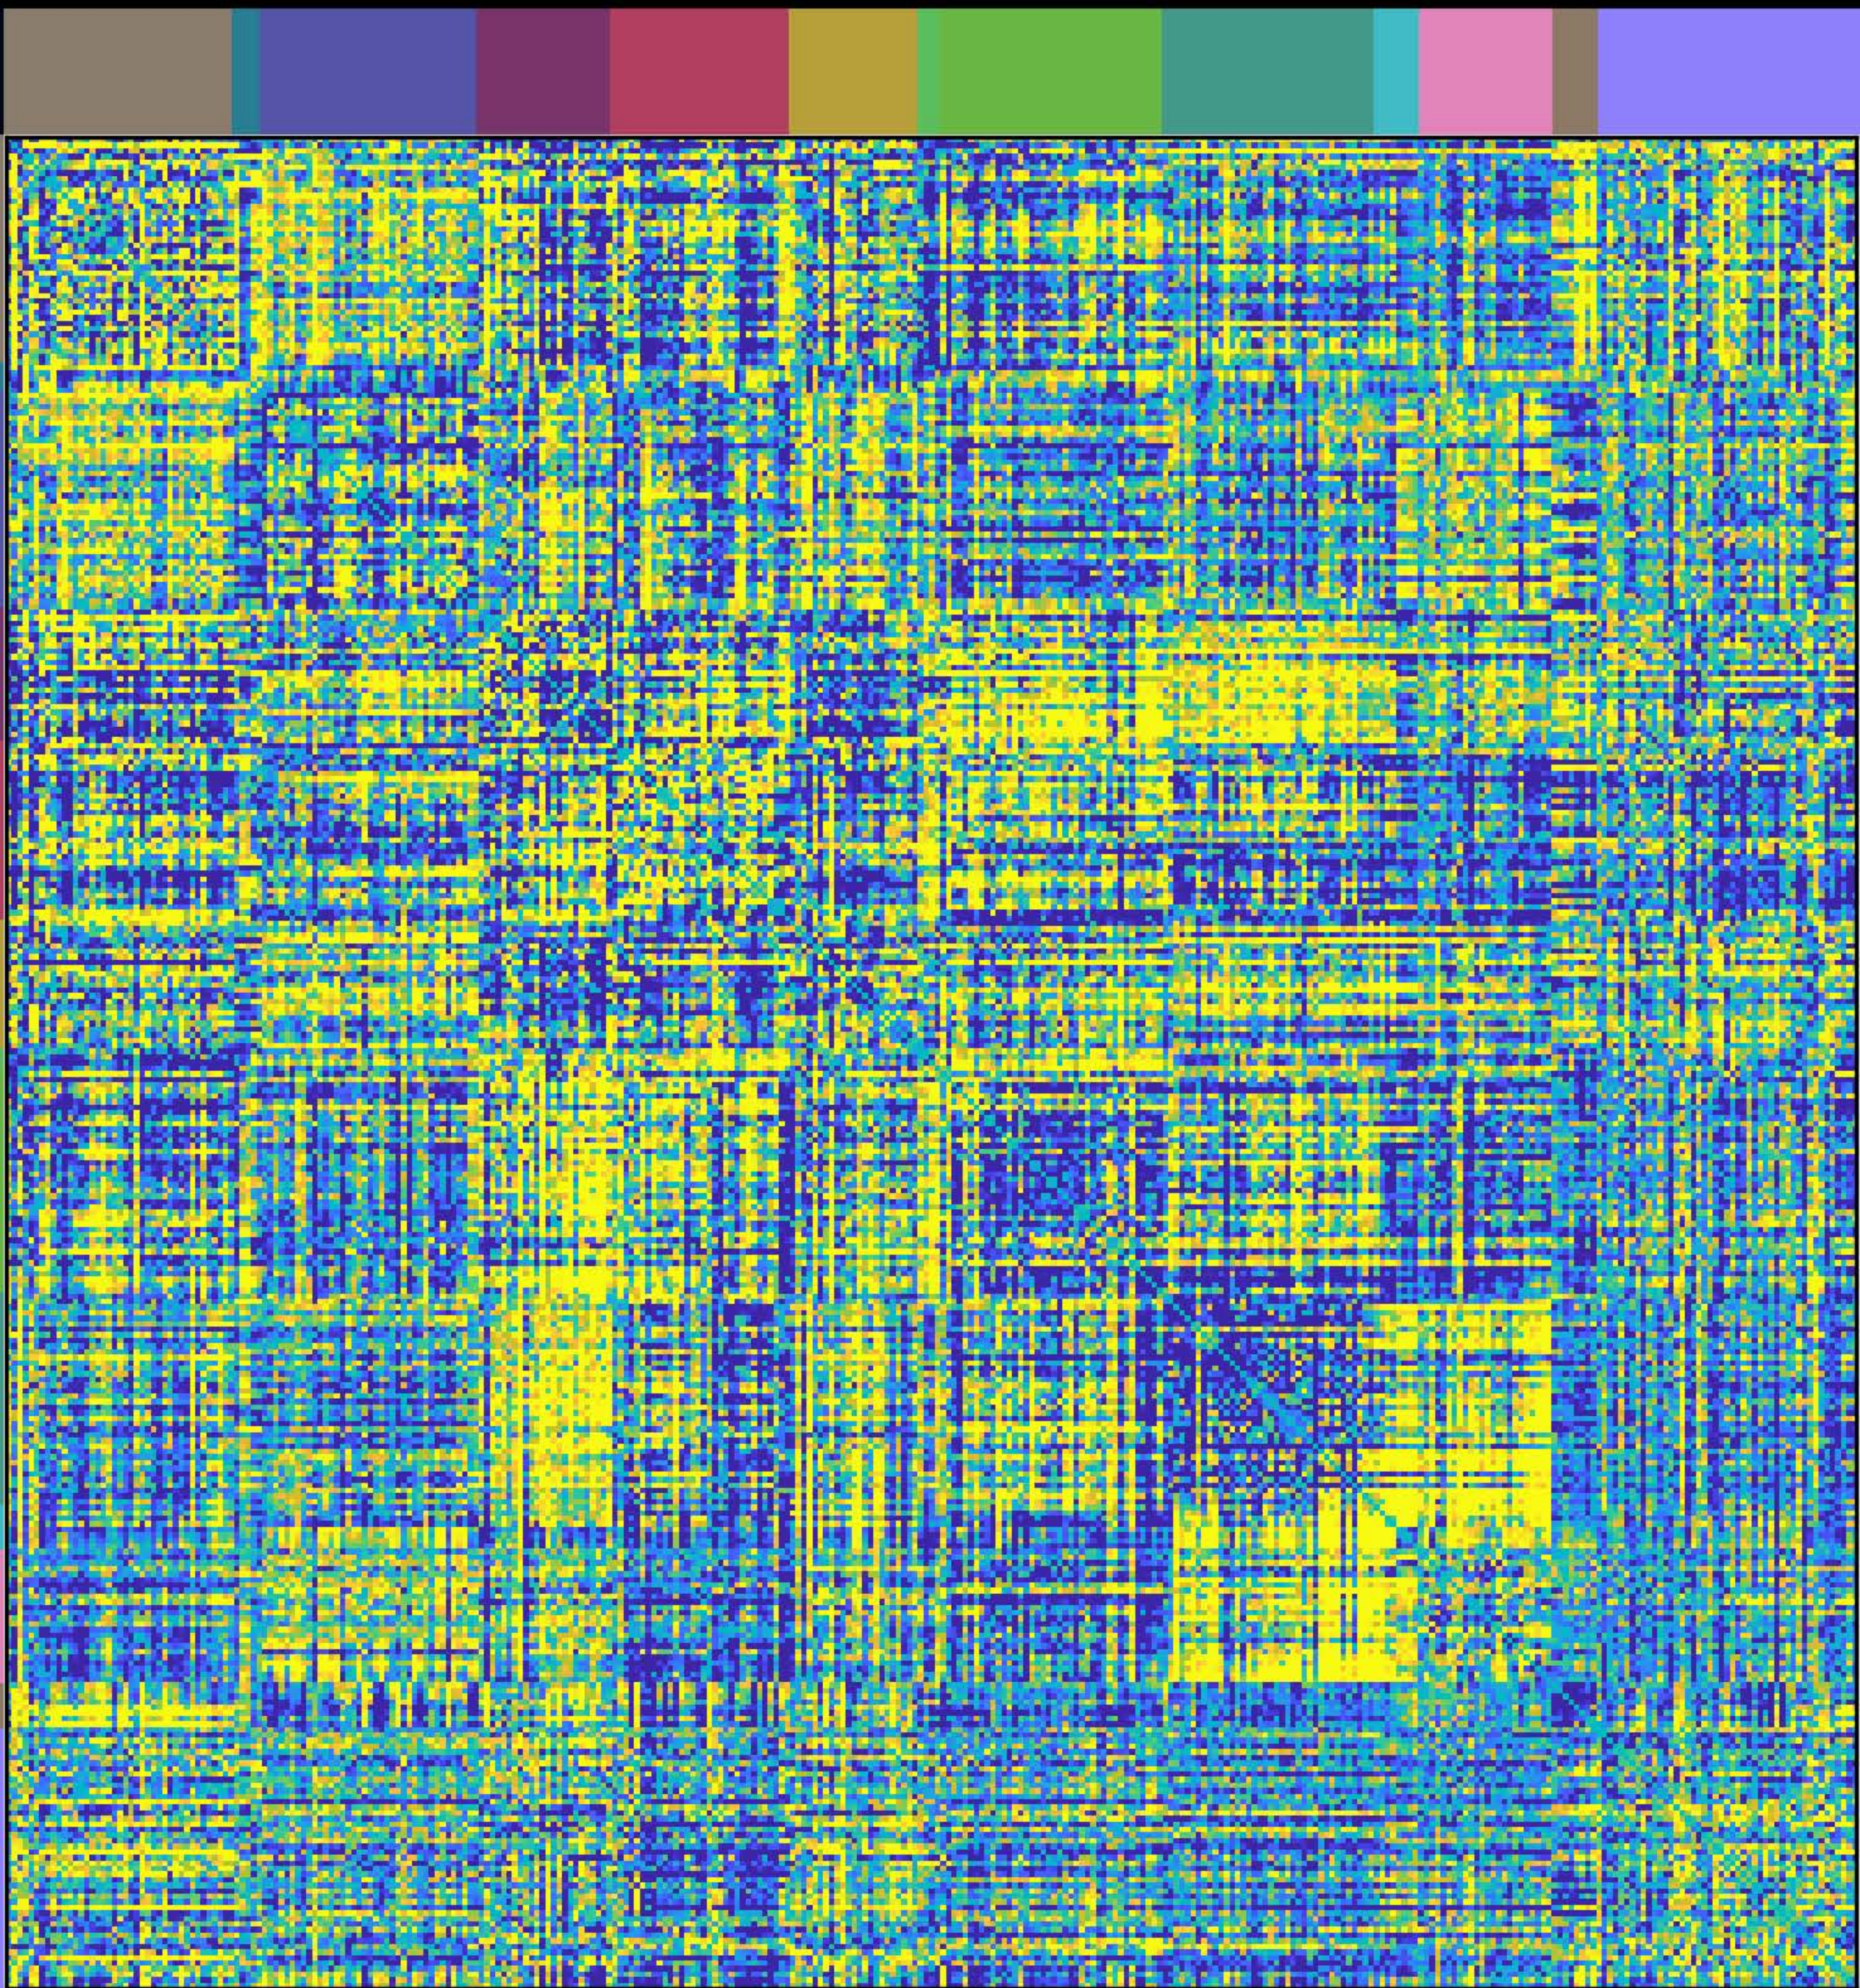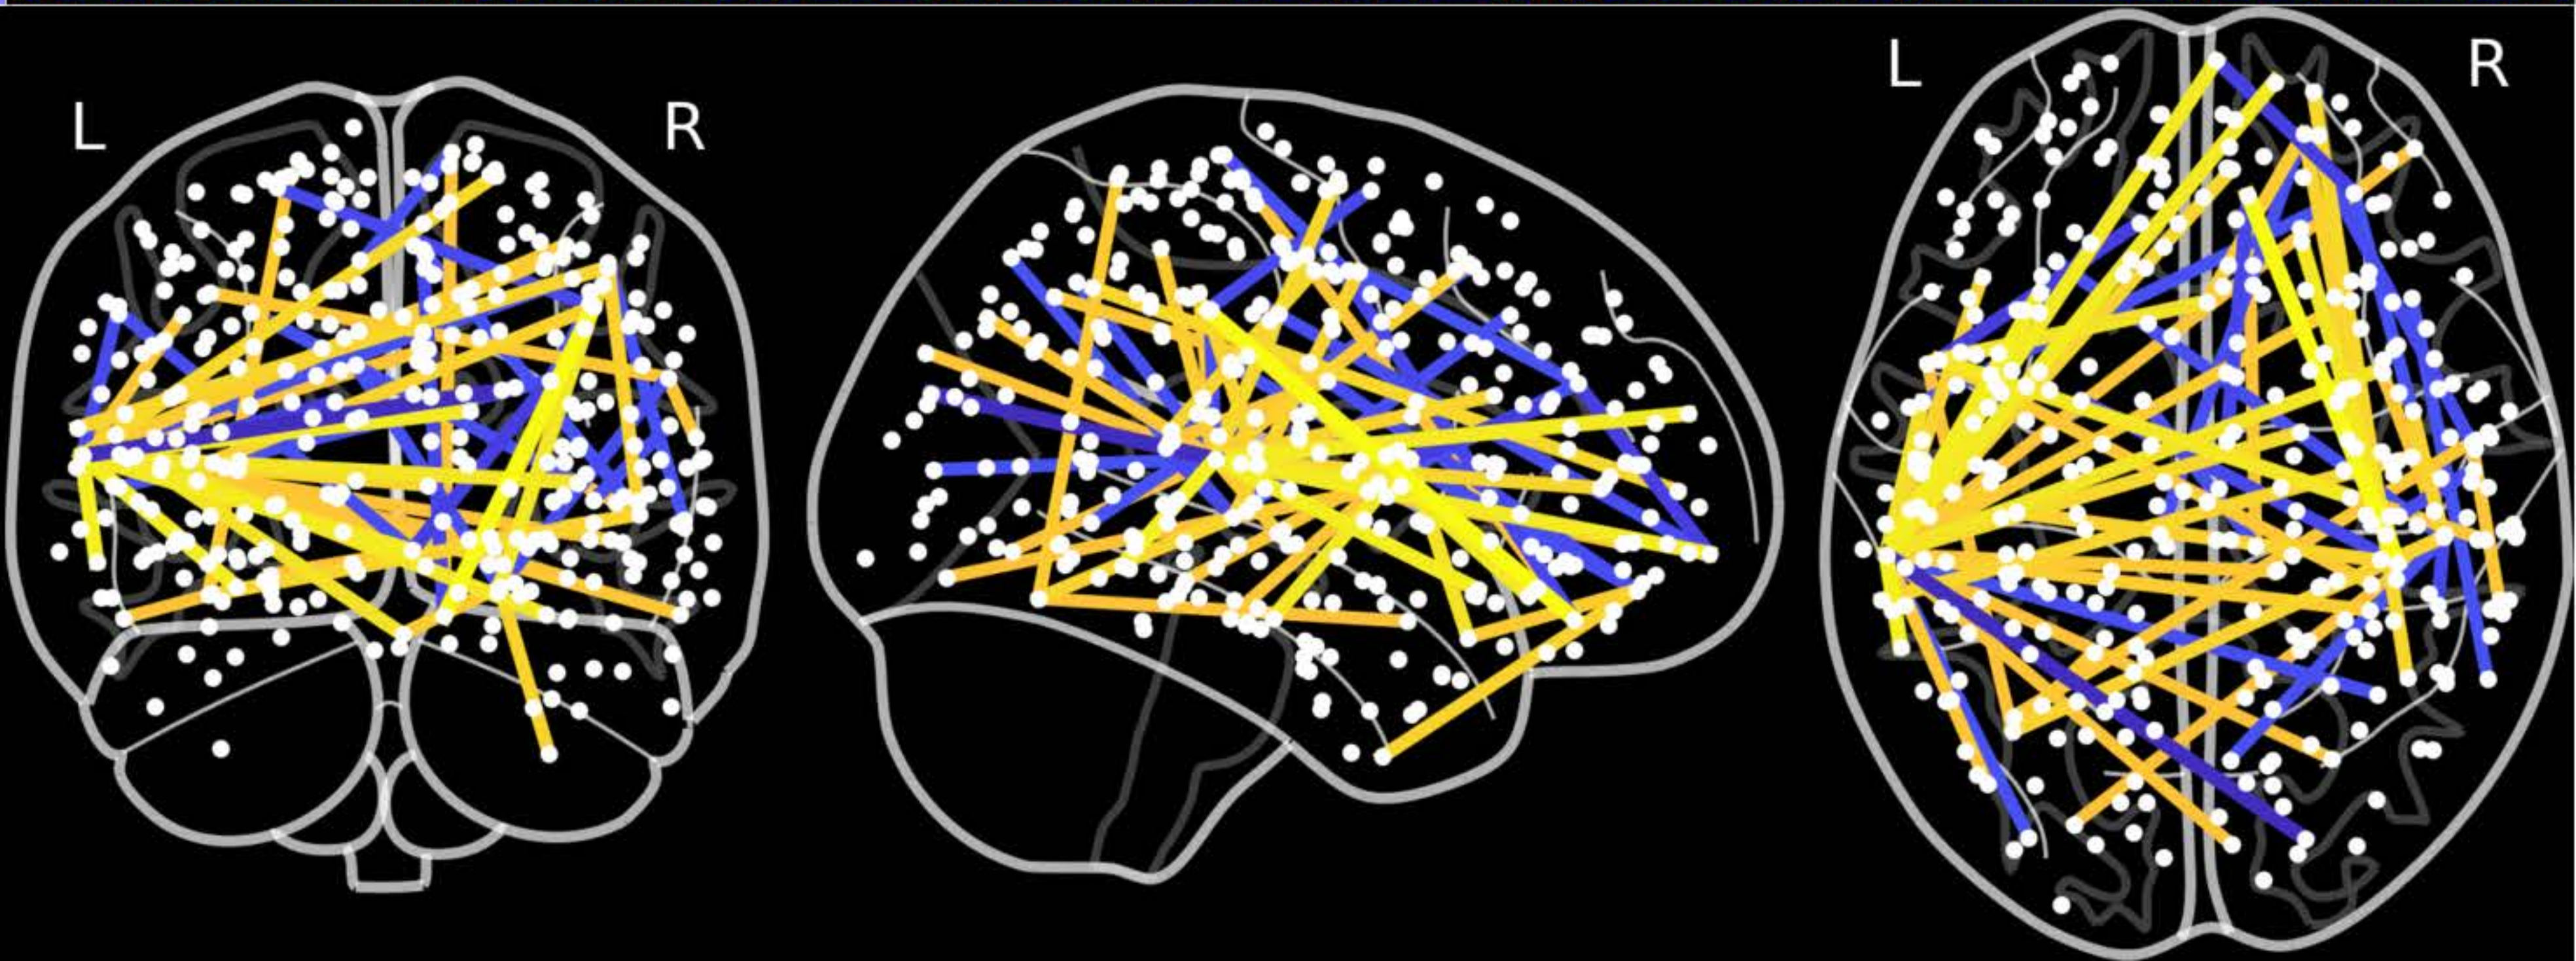



component\_24

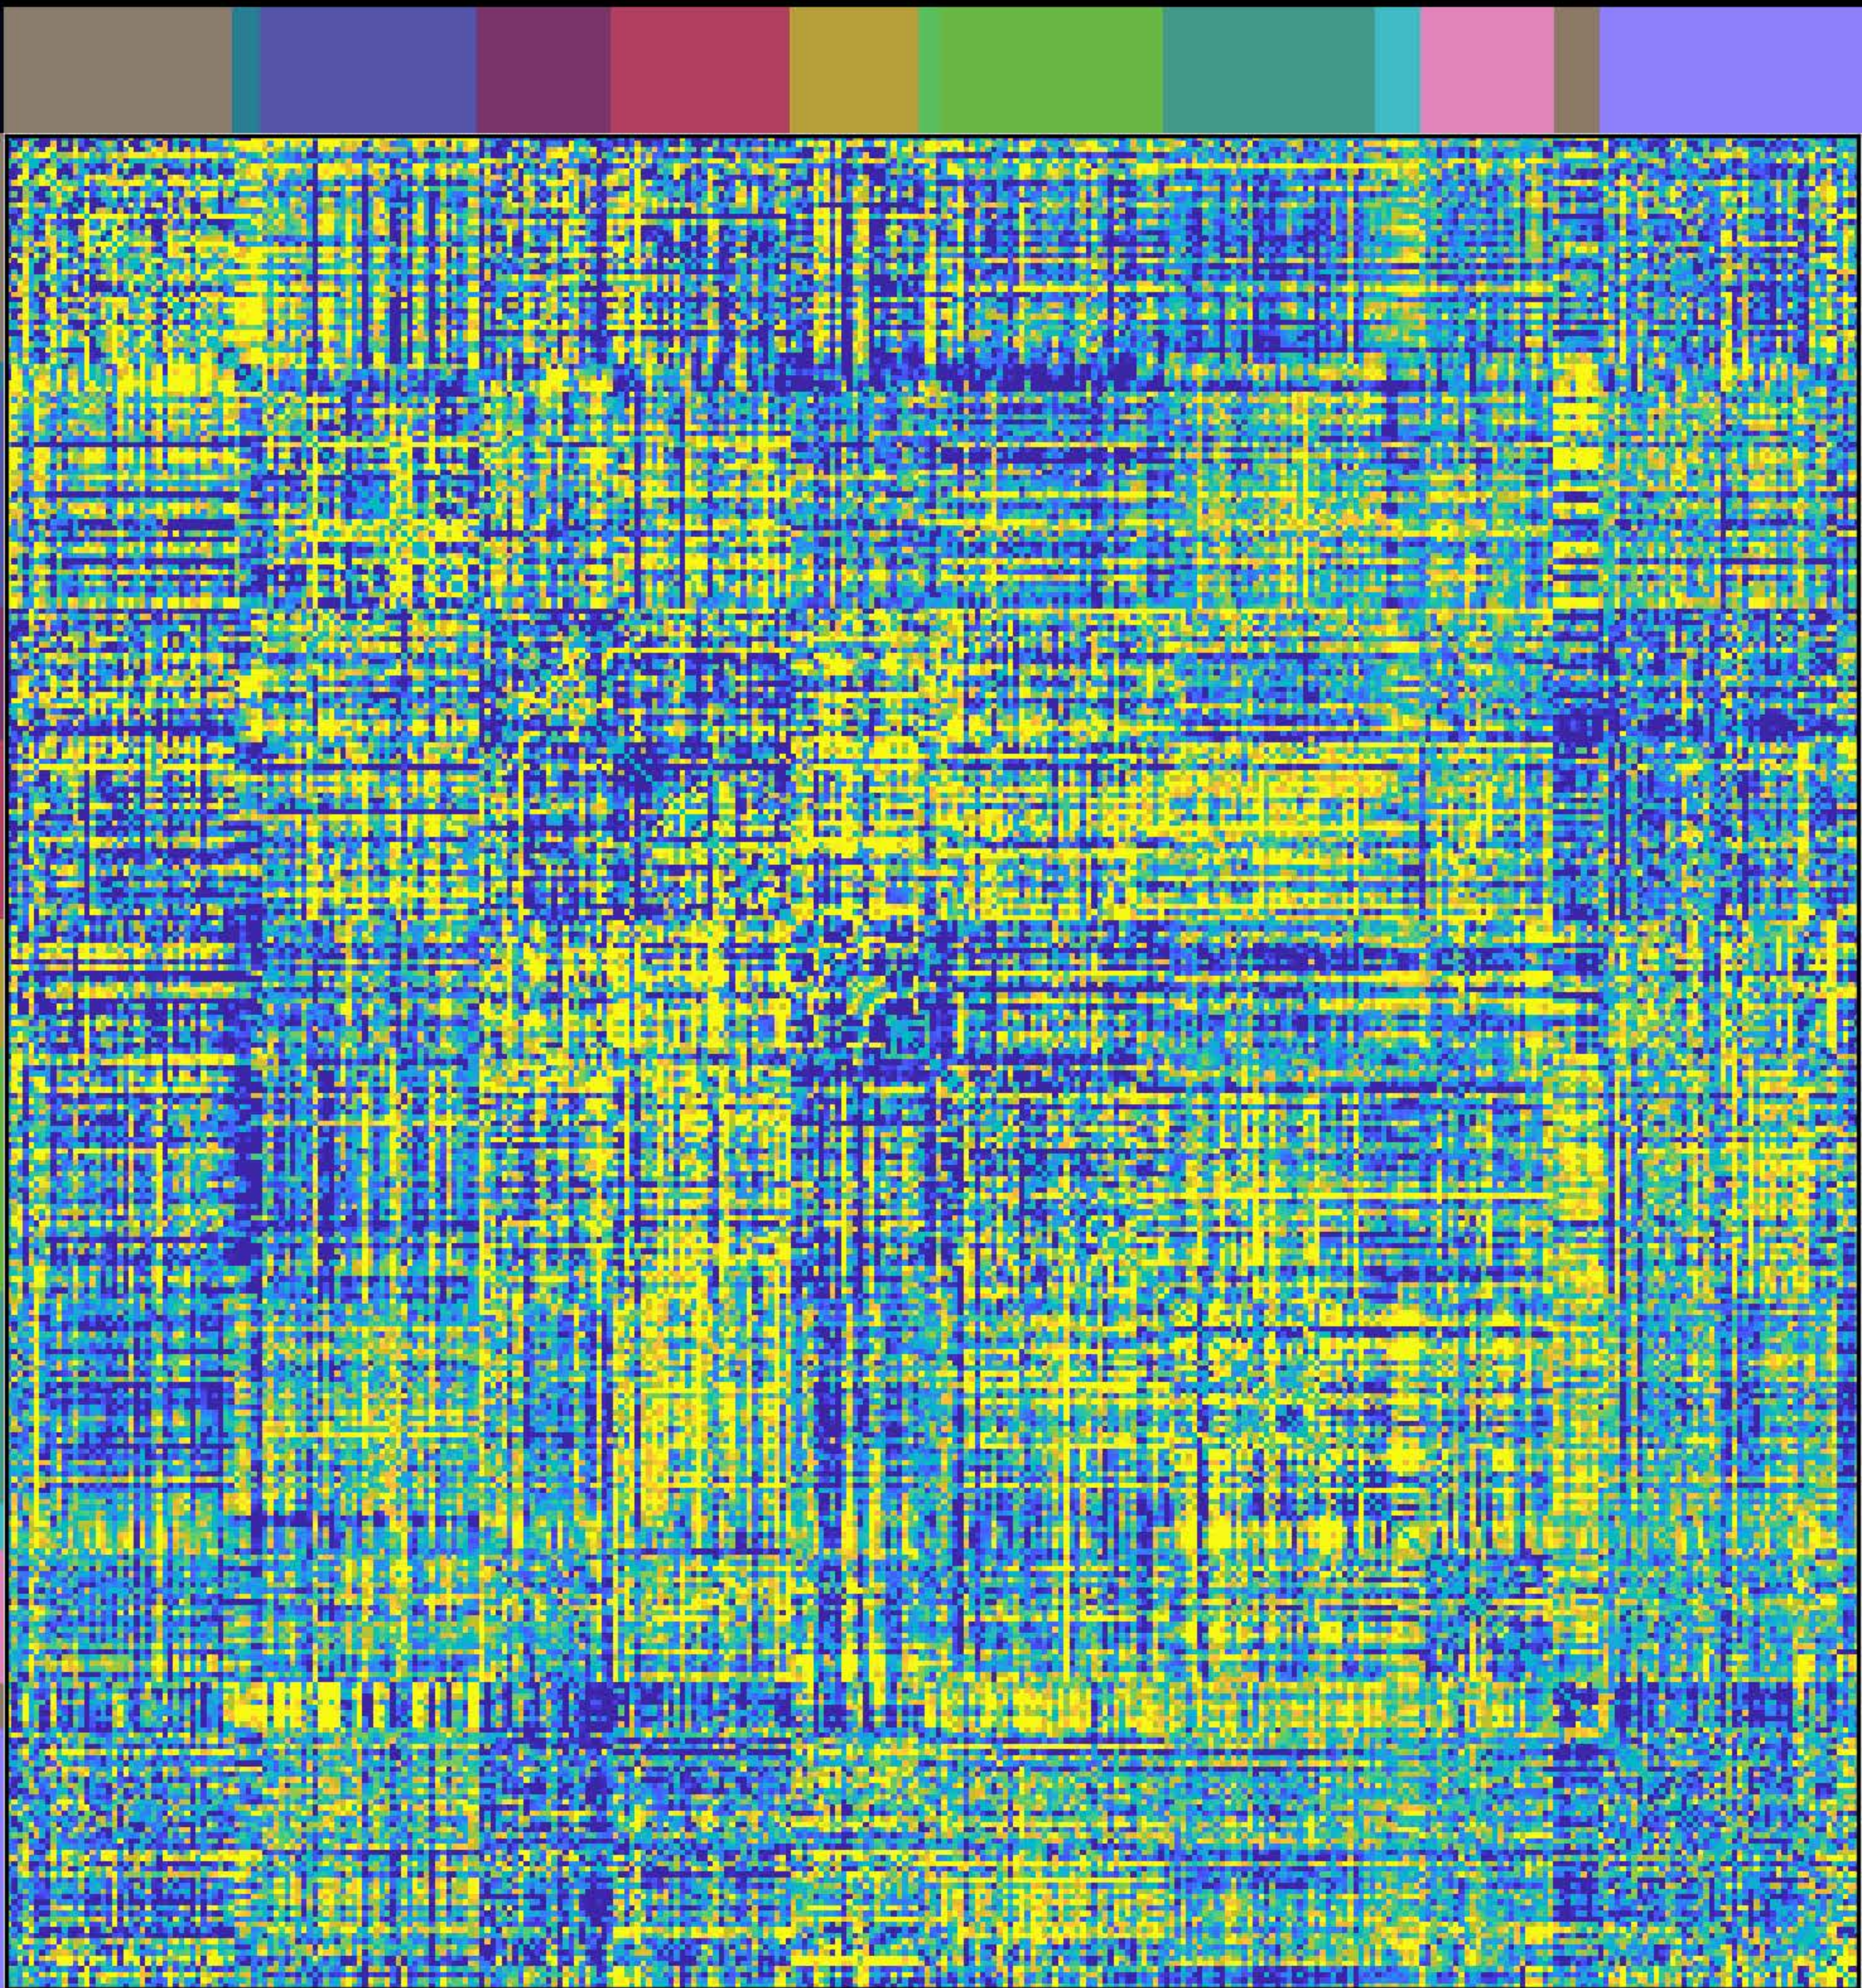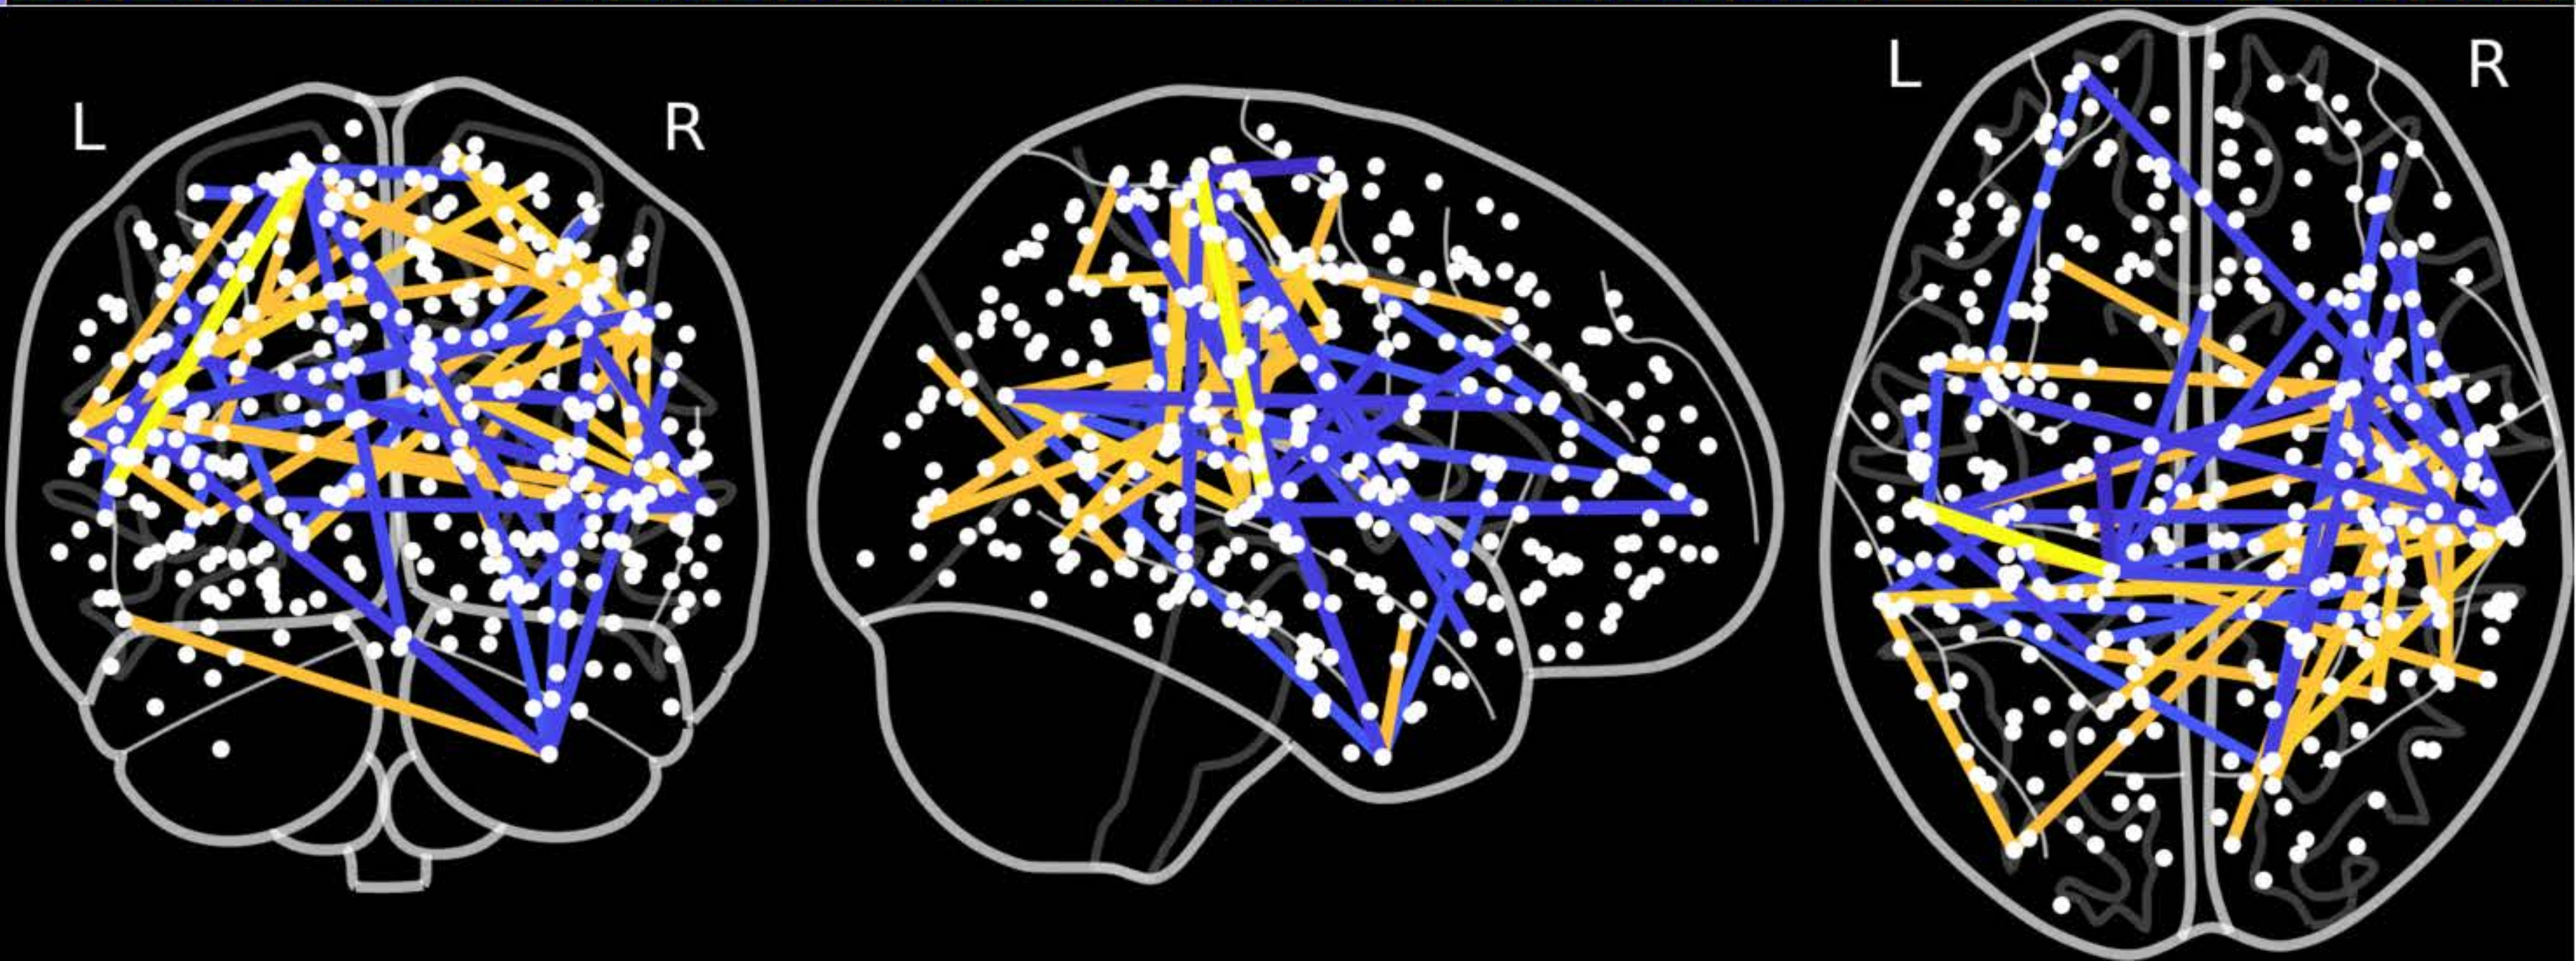



component\_25

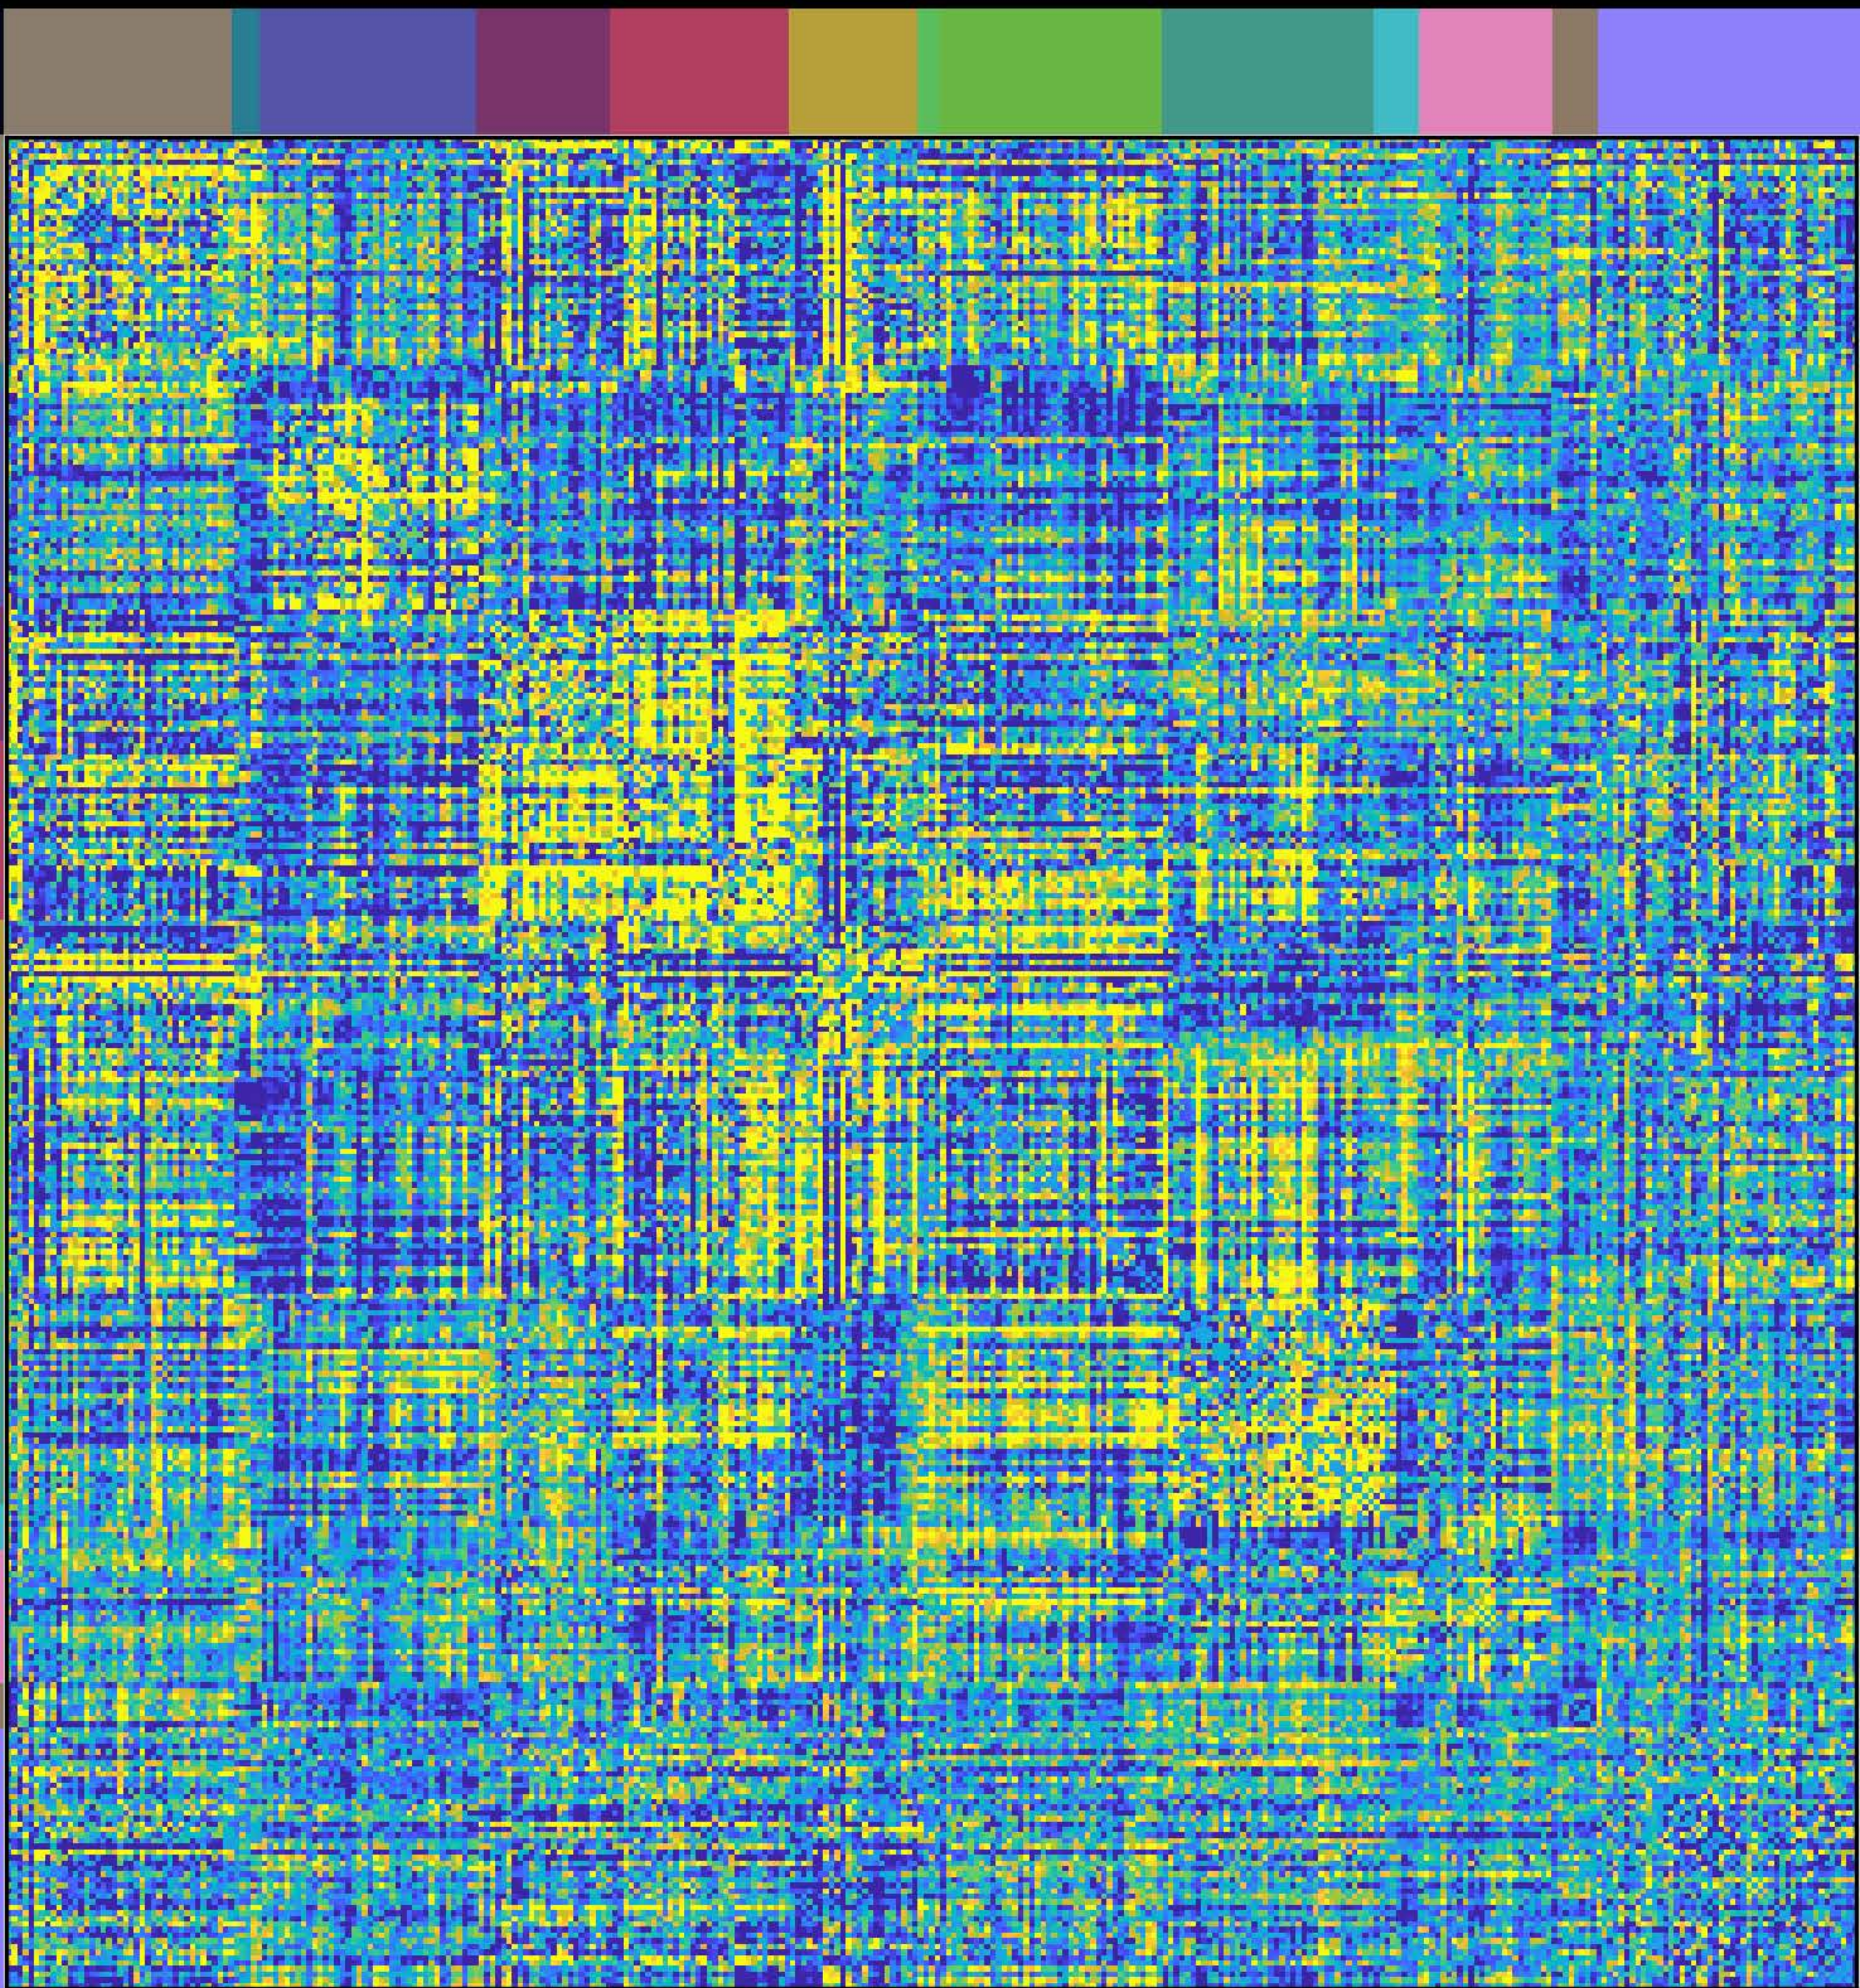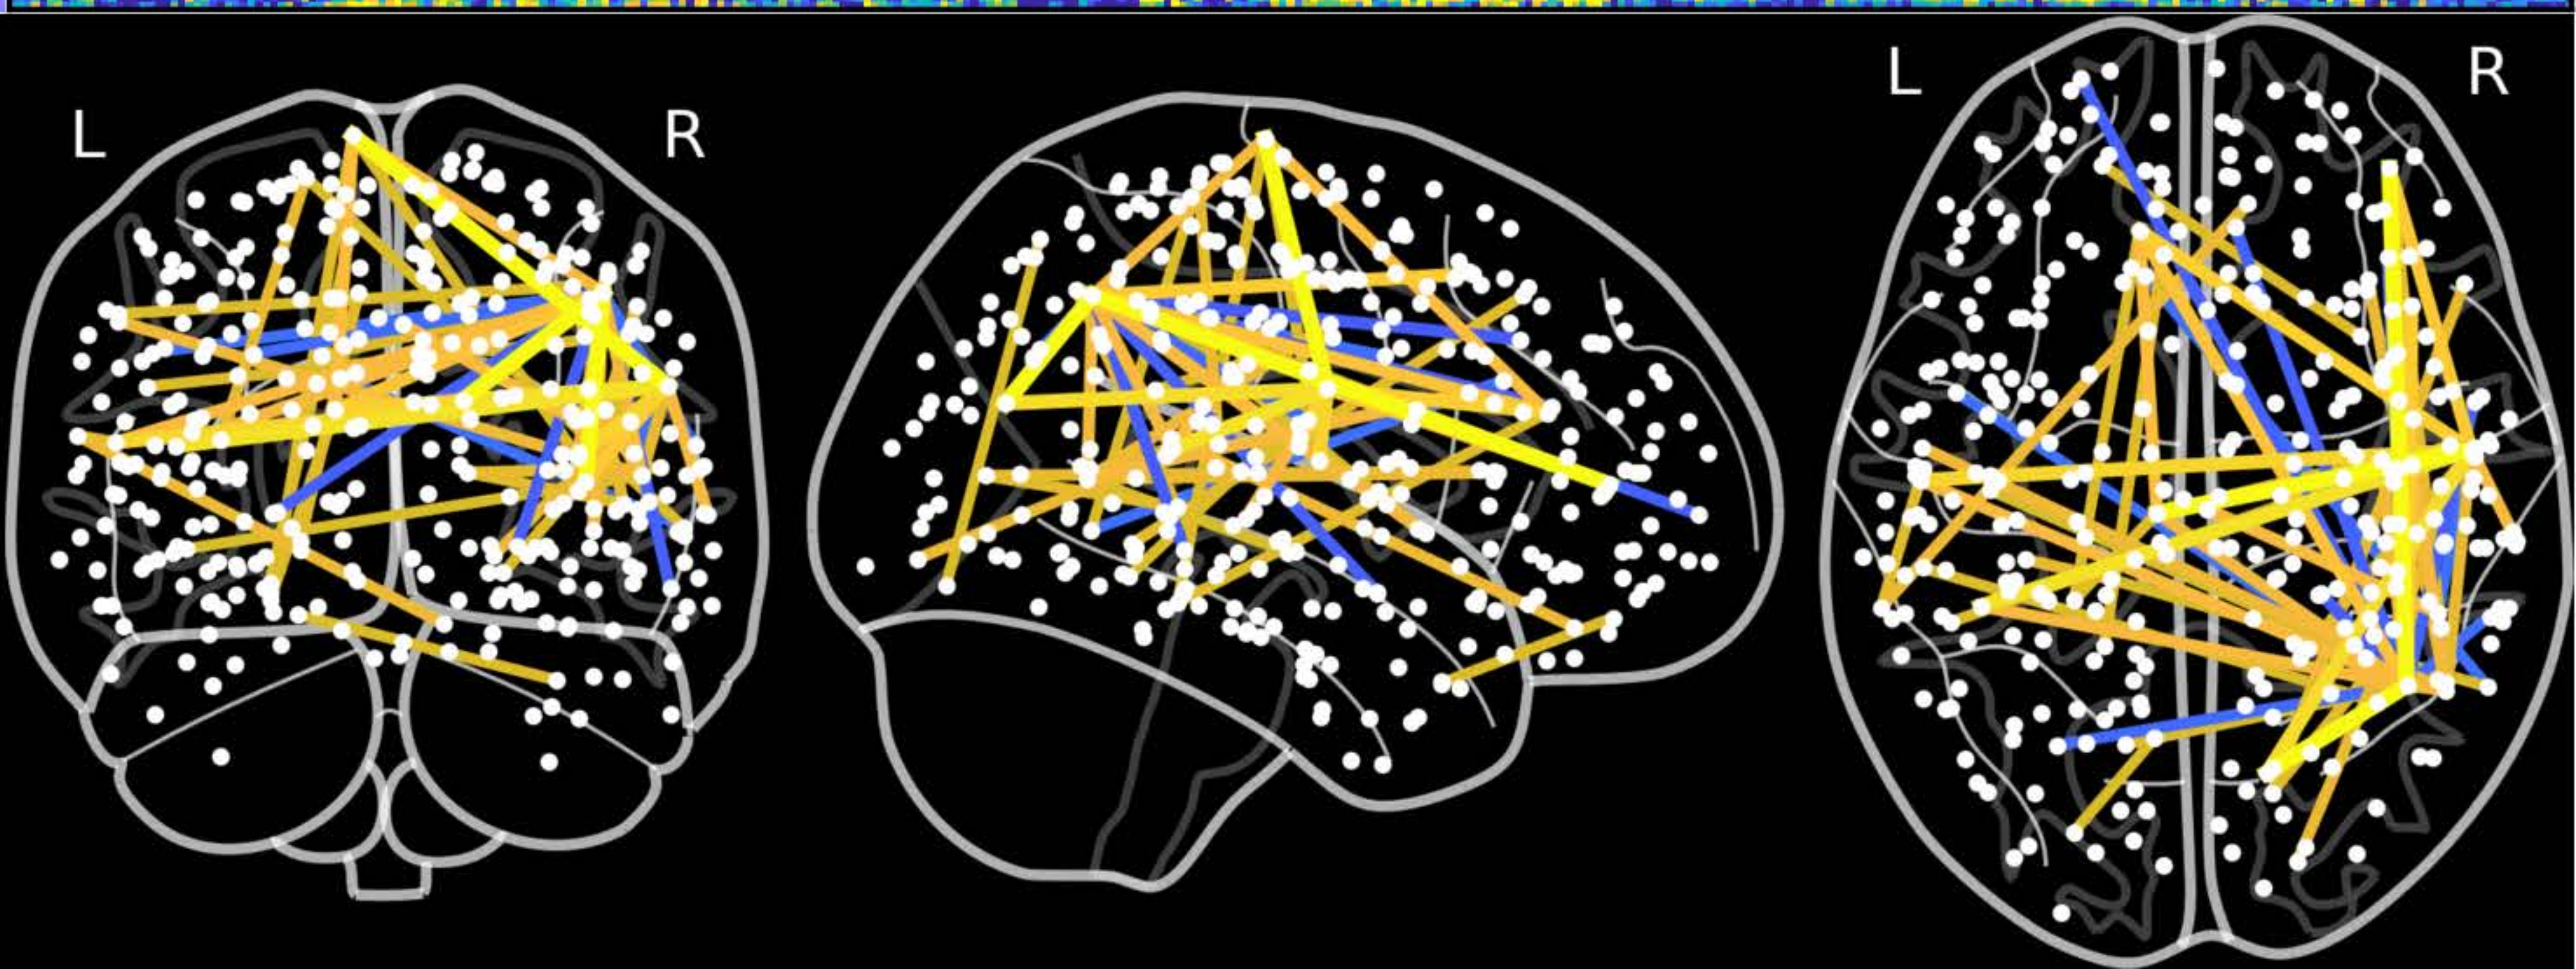



component\_26

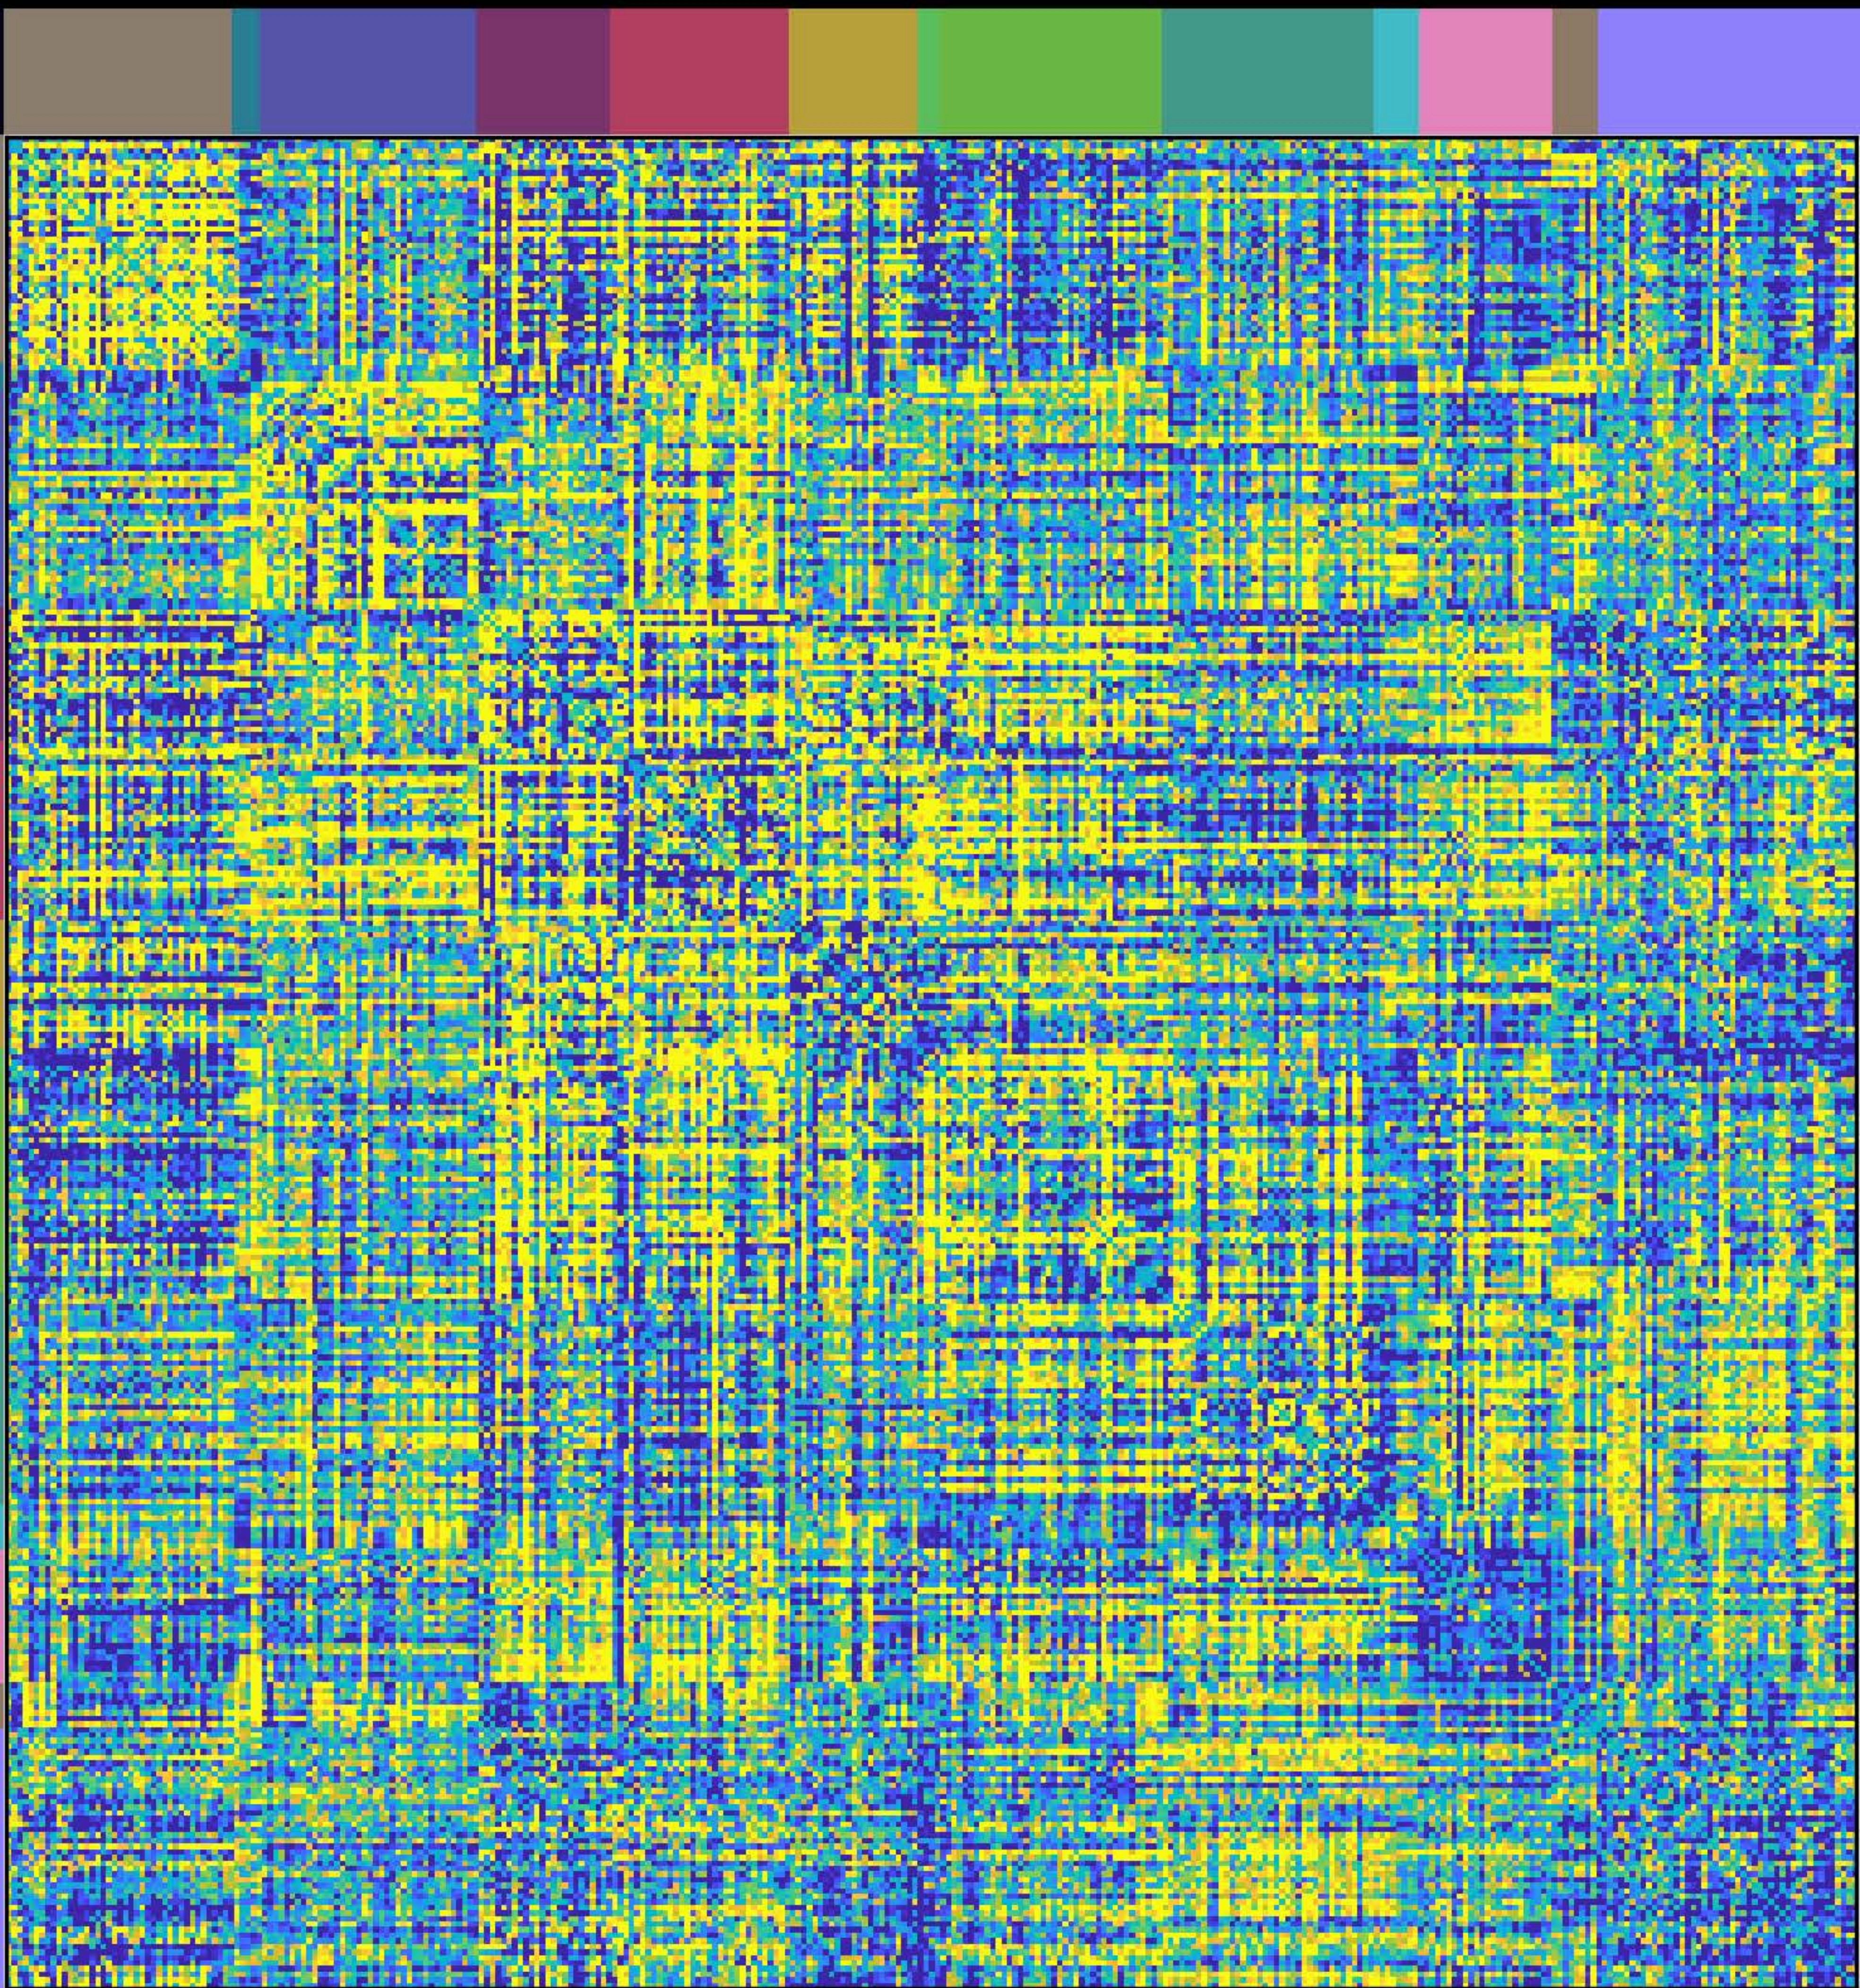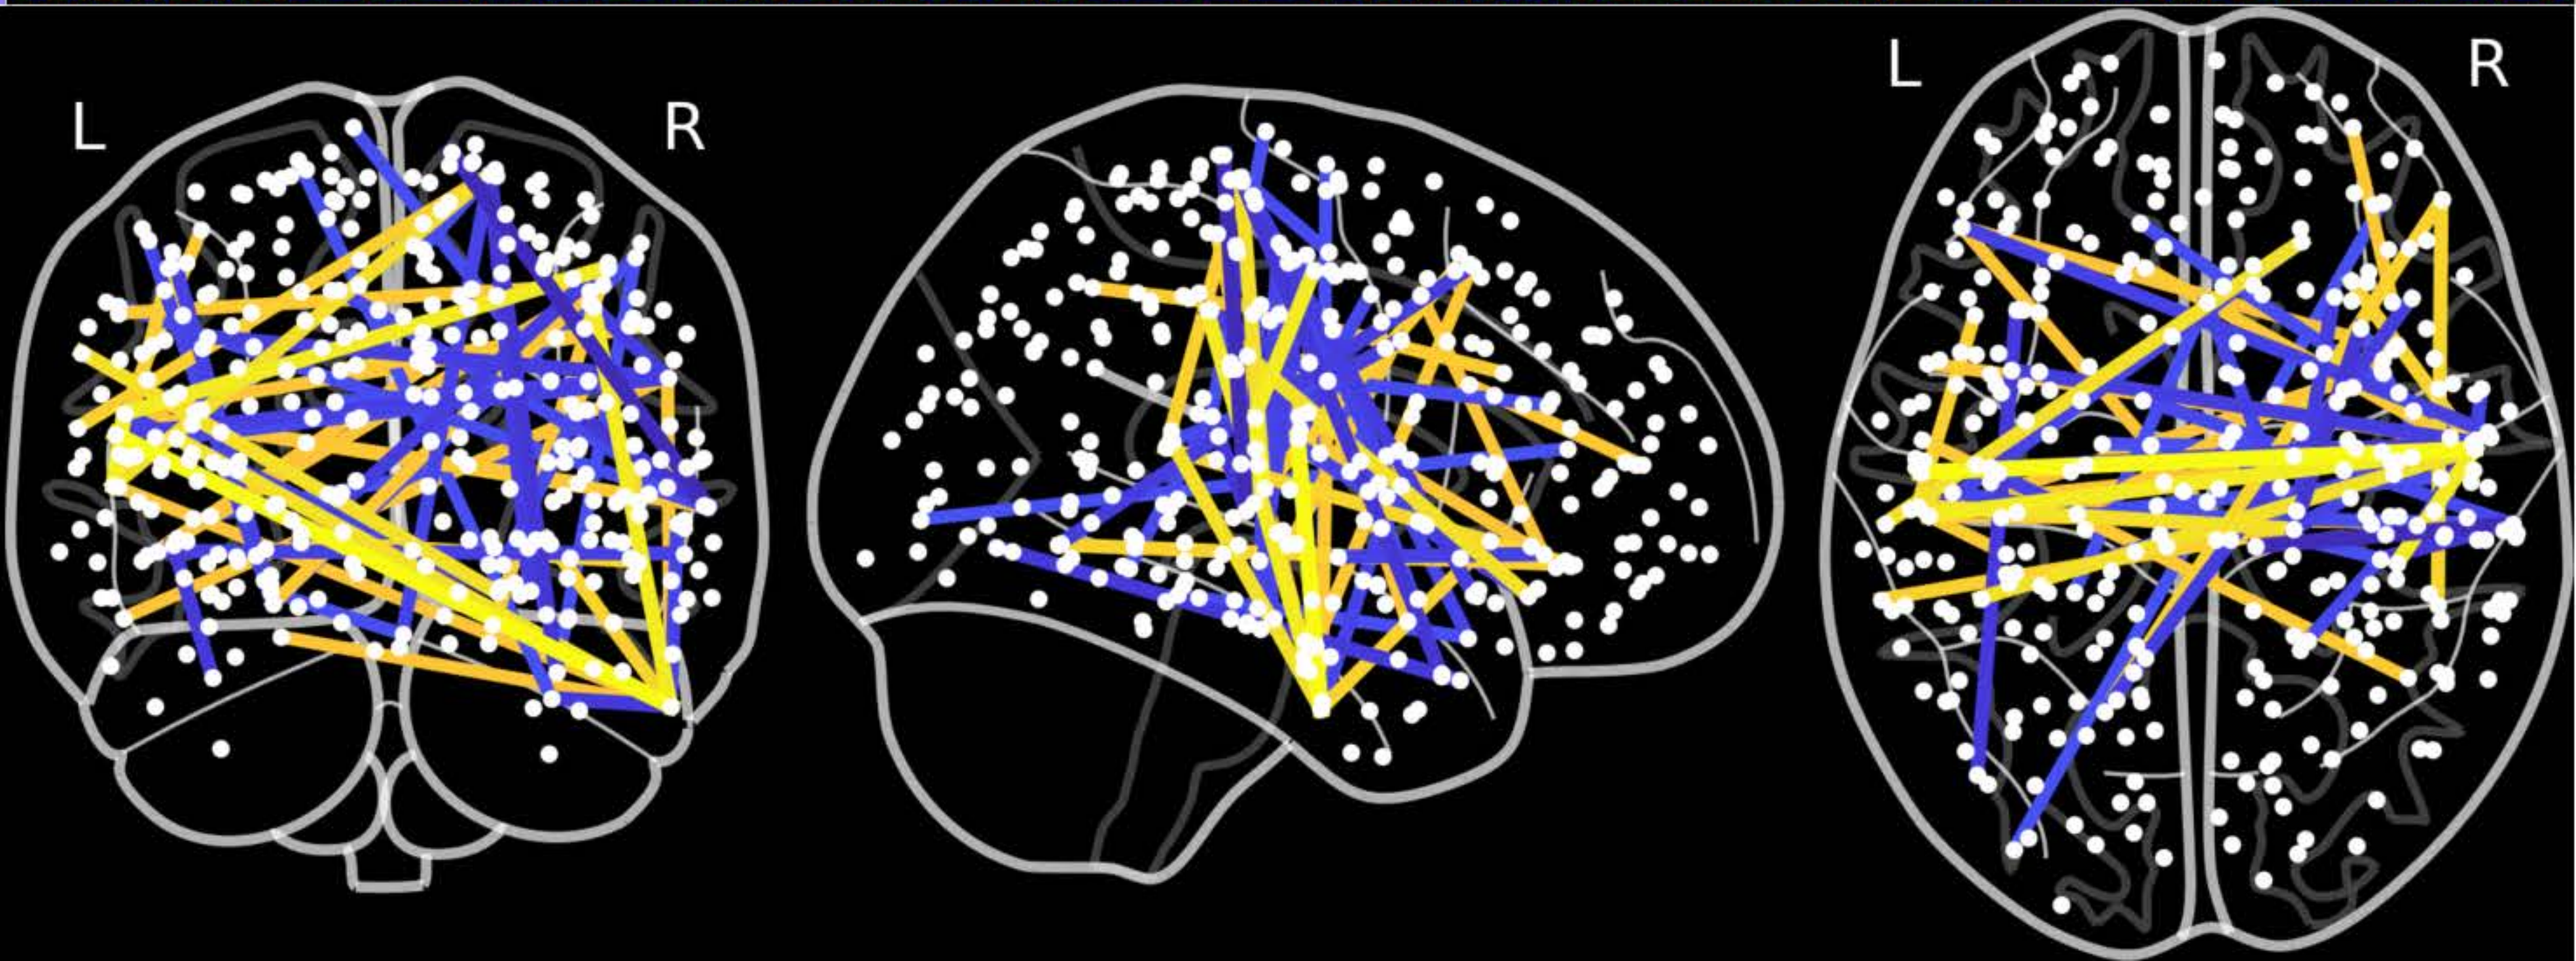



component\_27

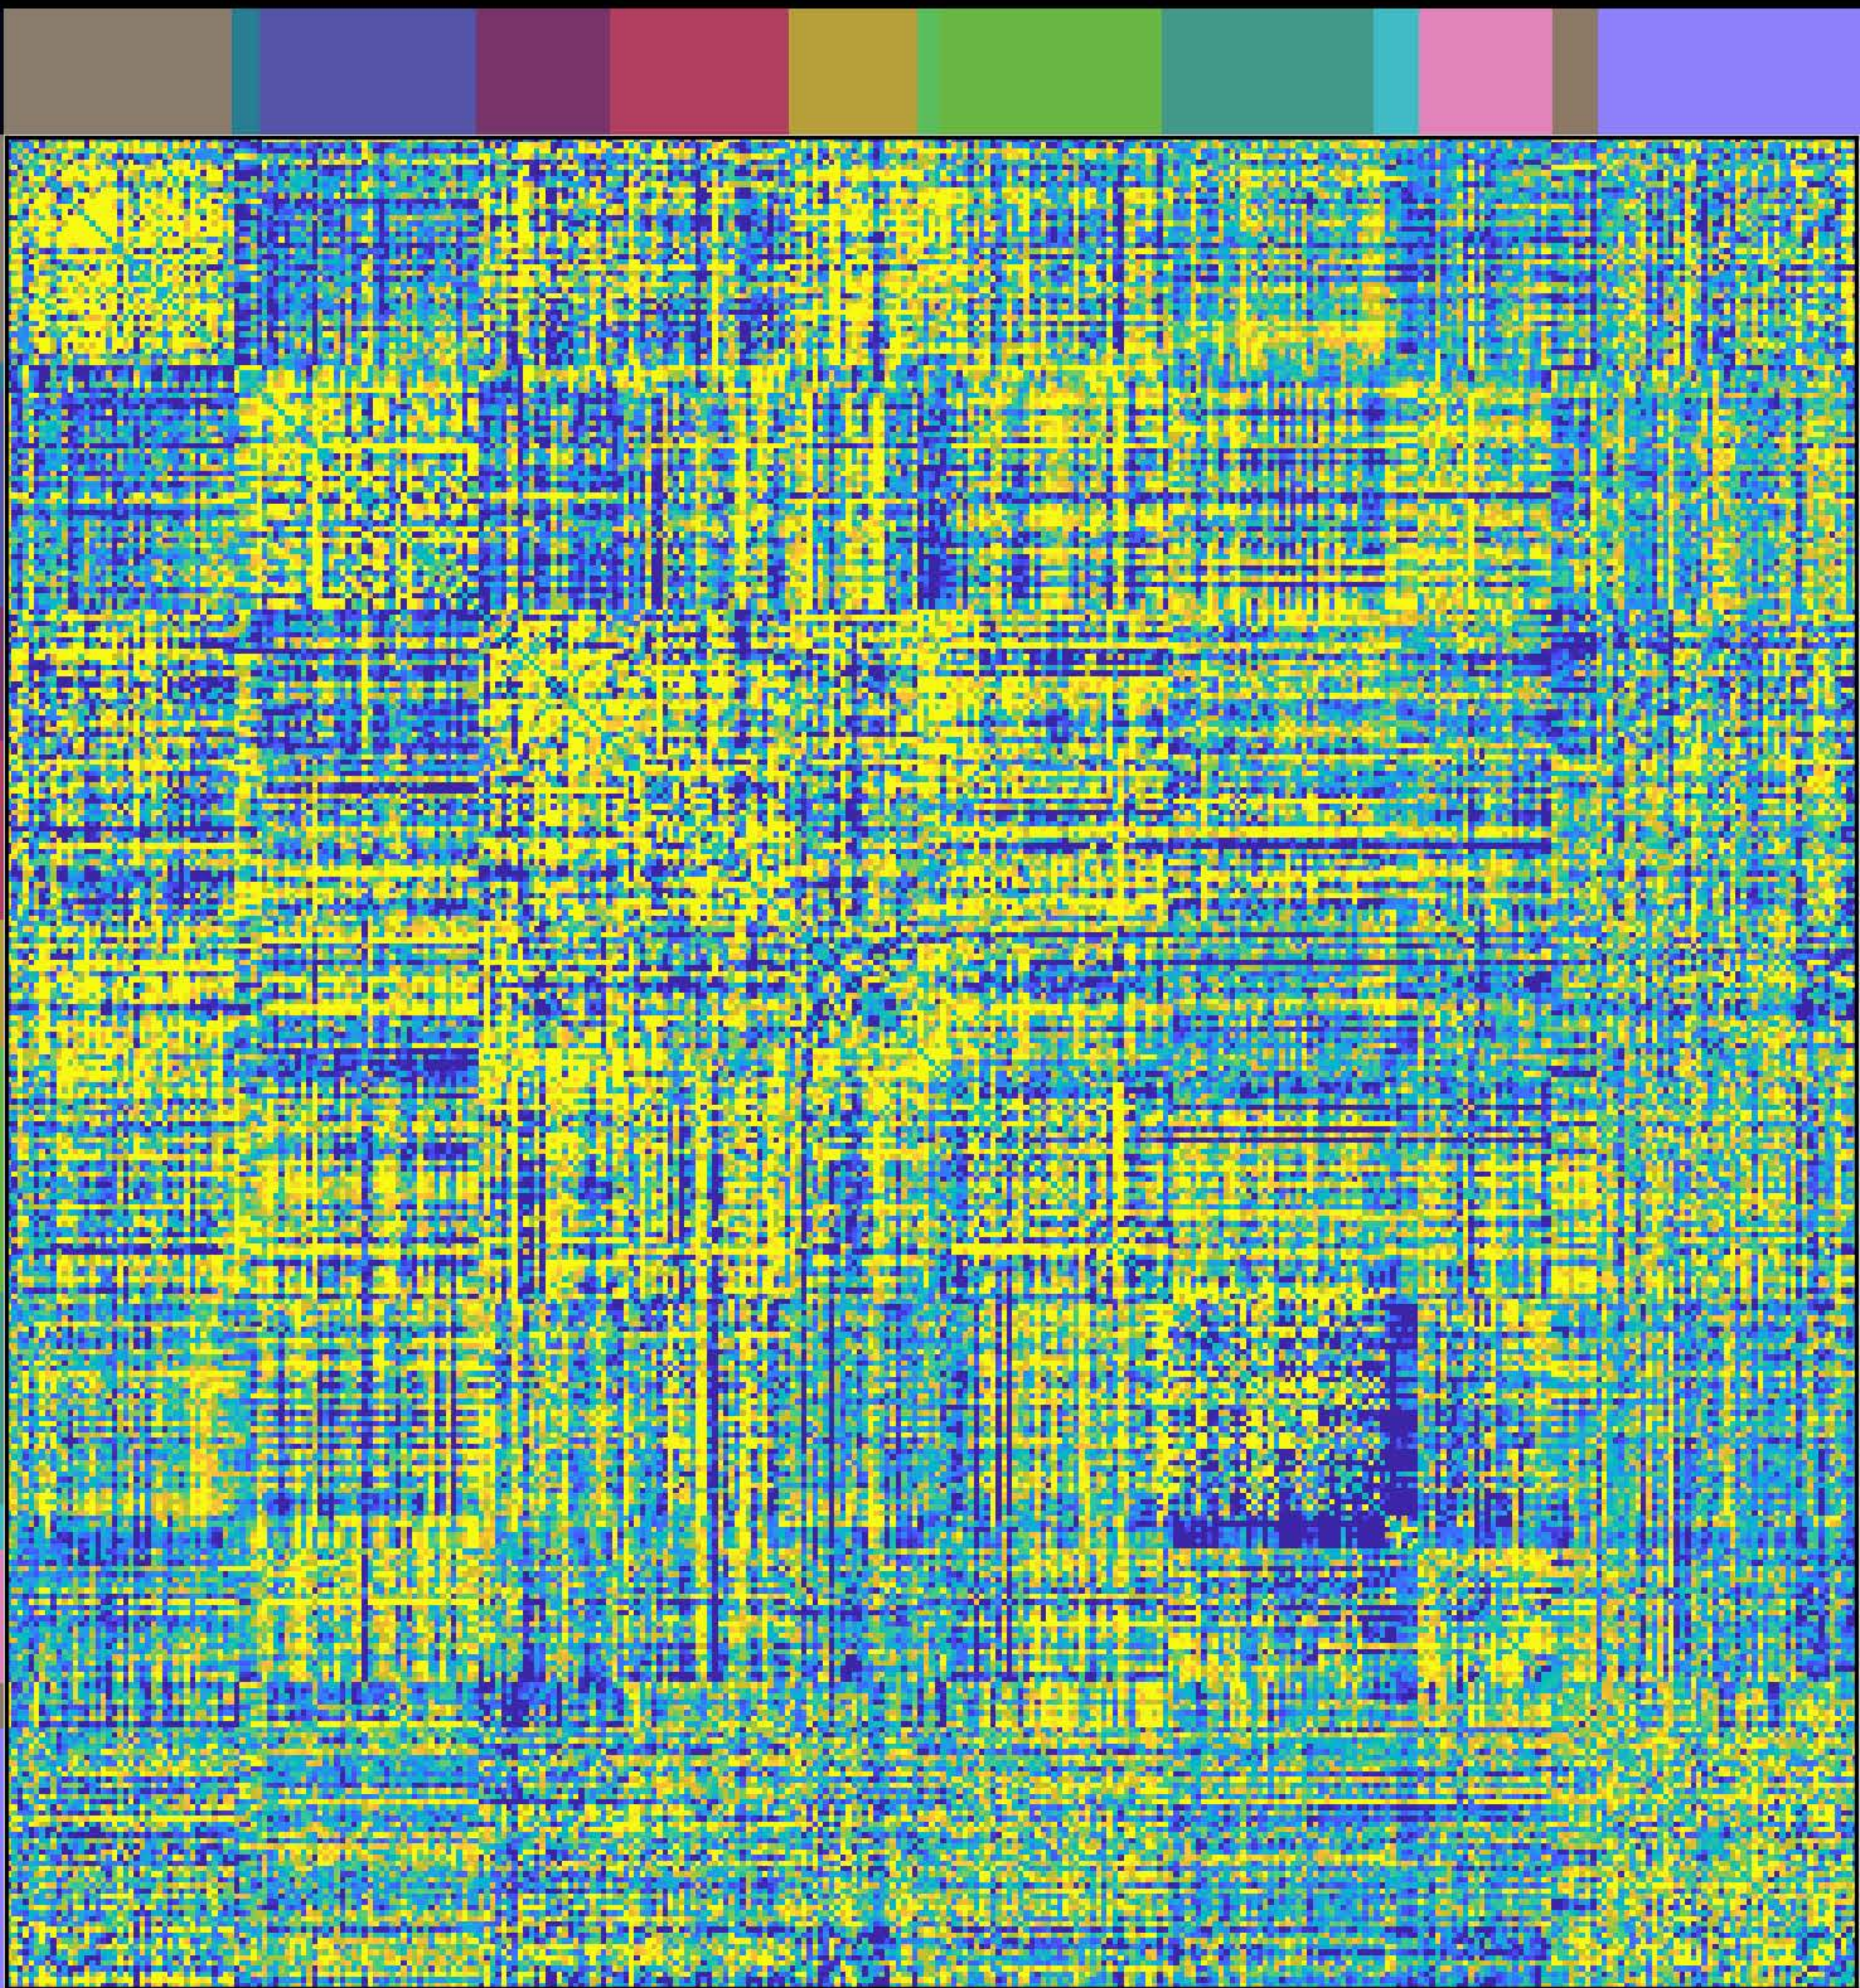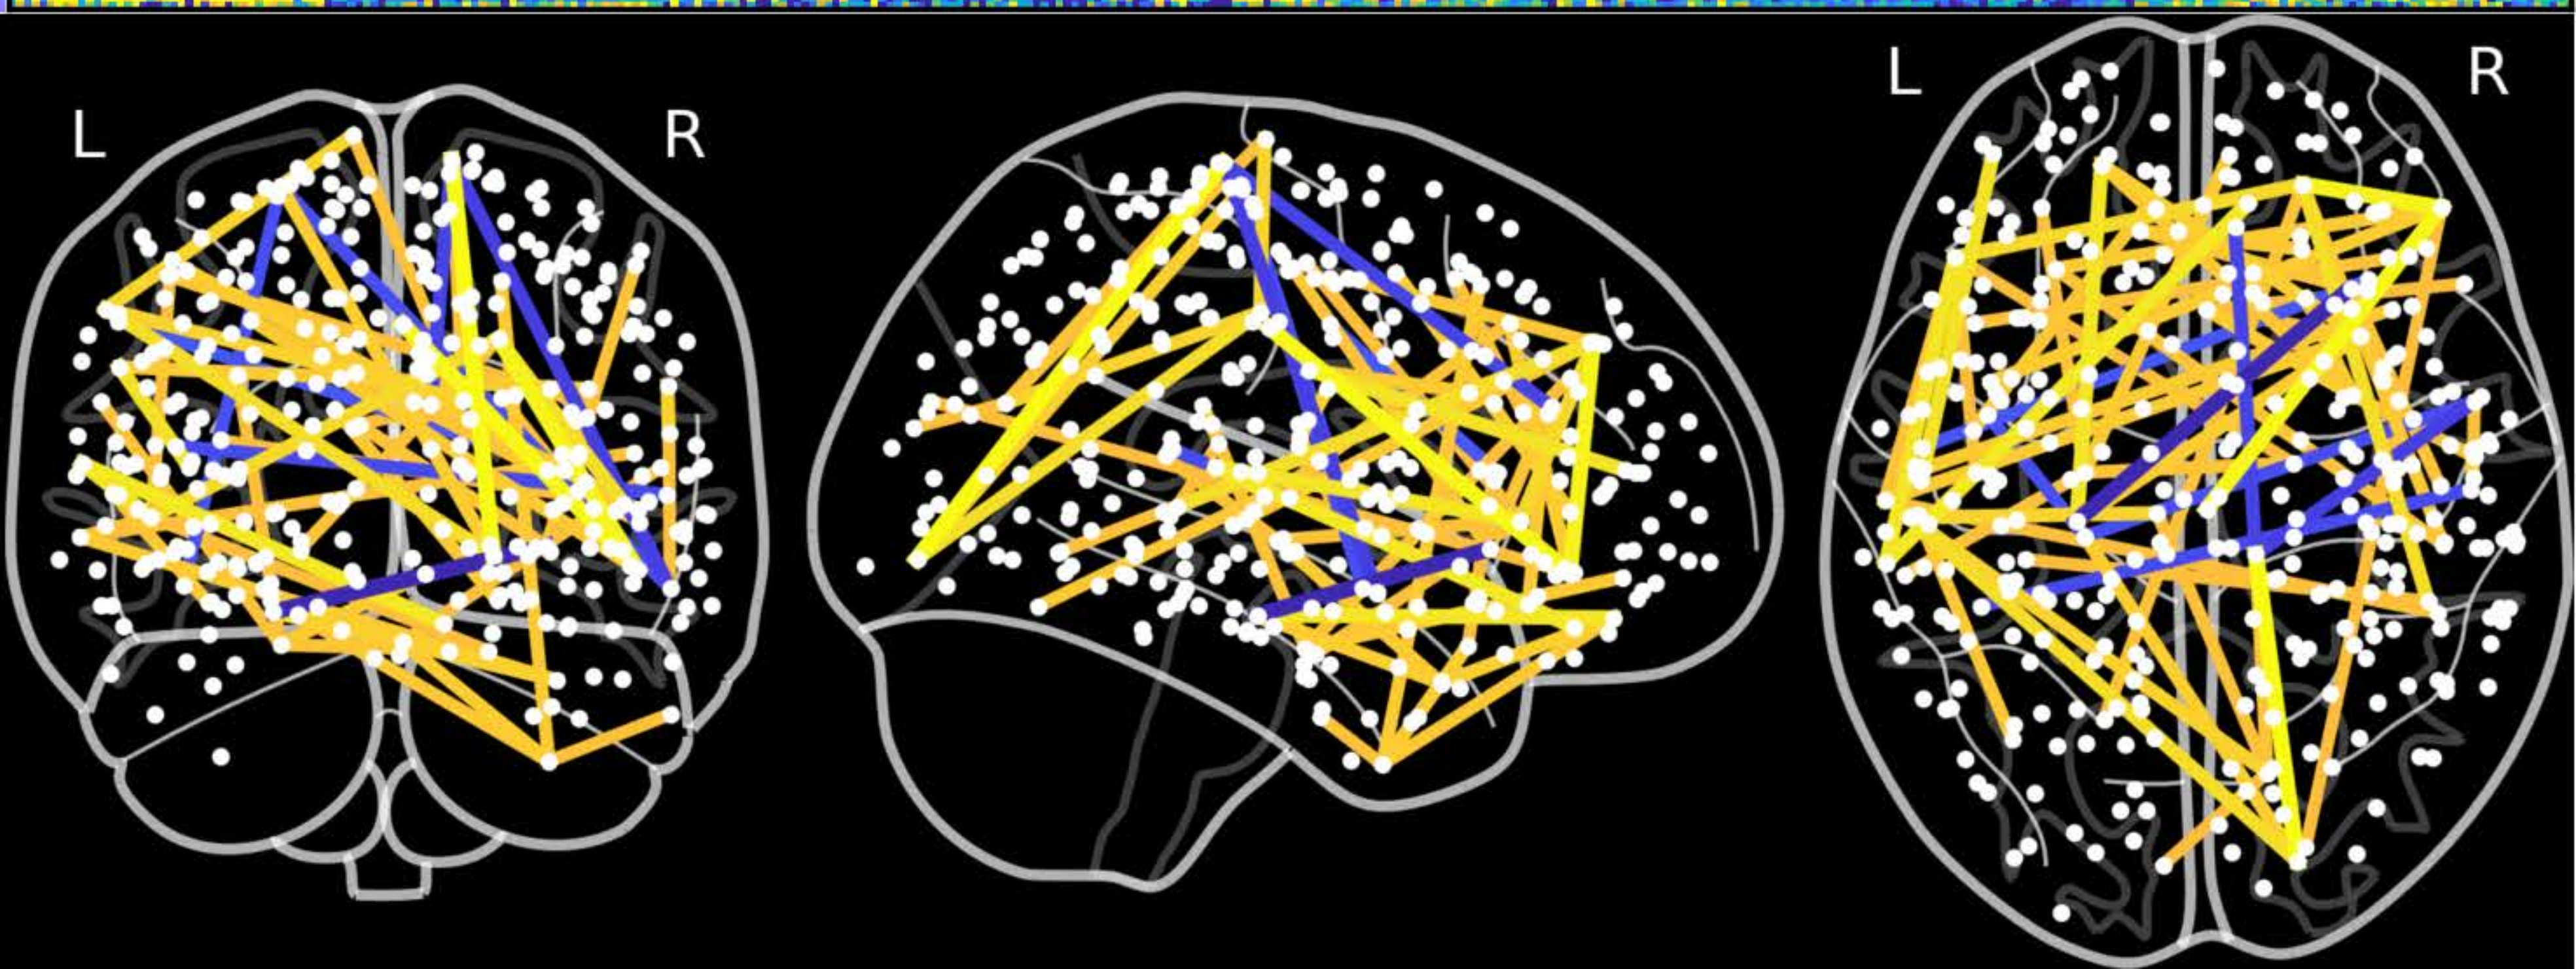



component\_28

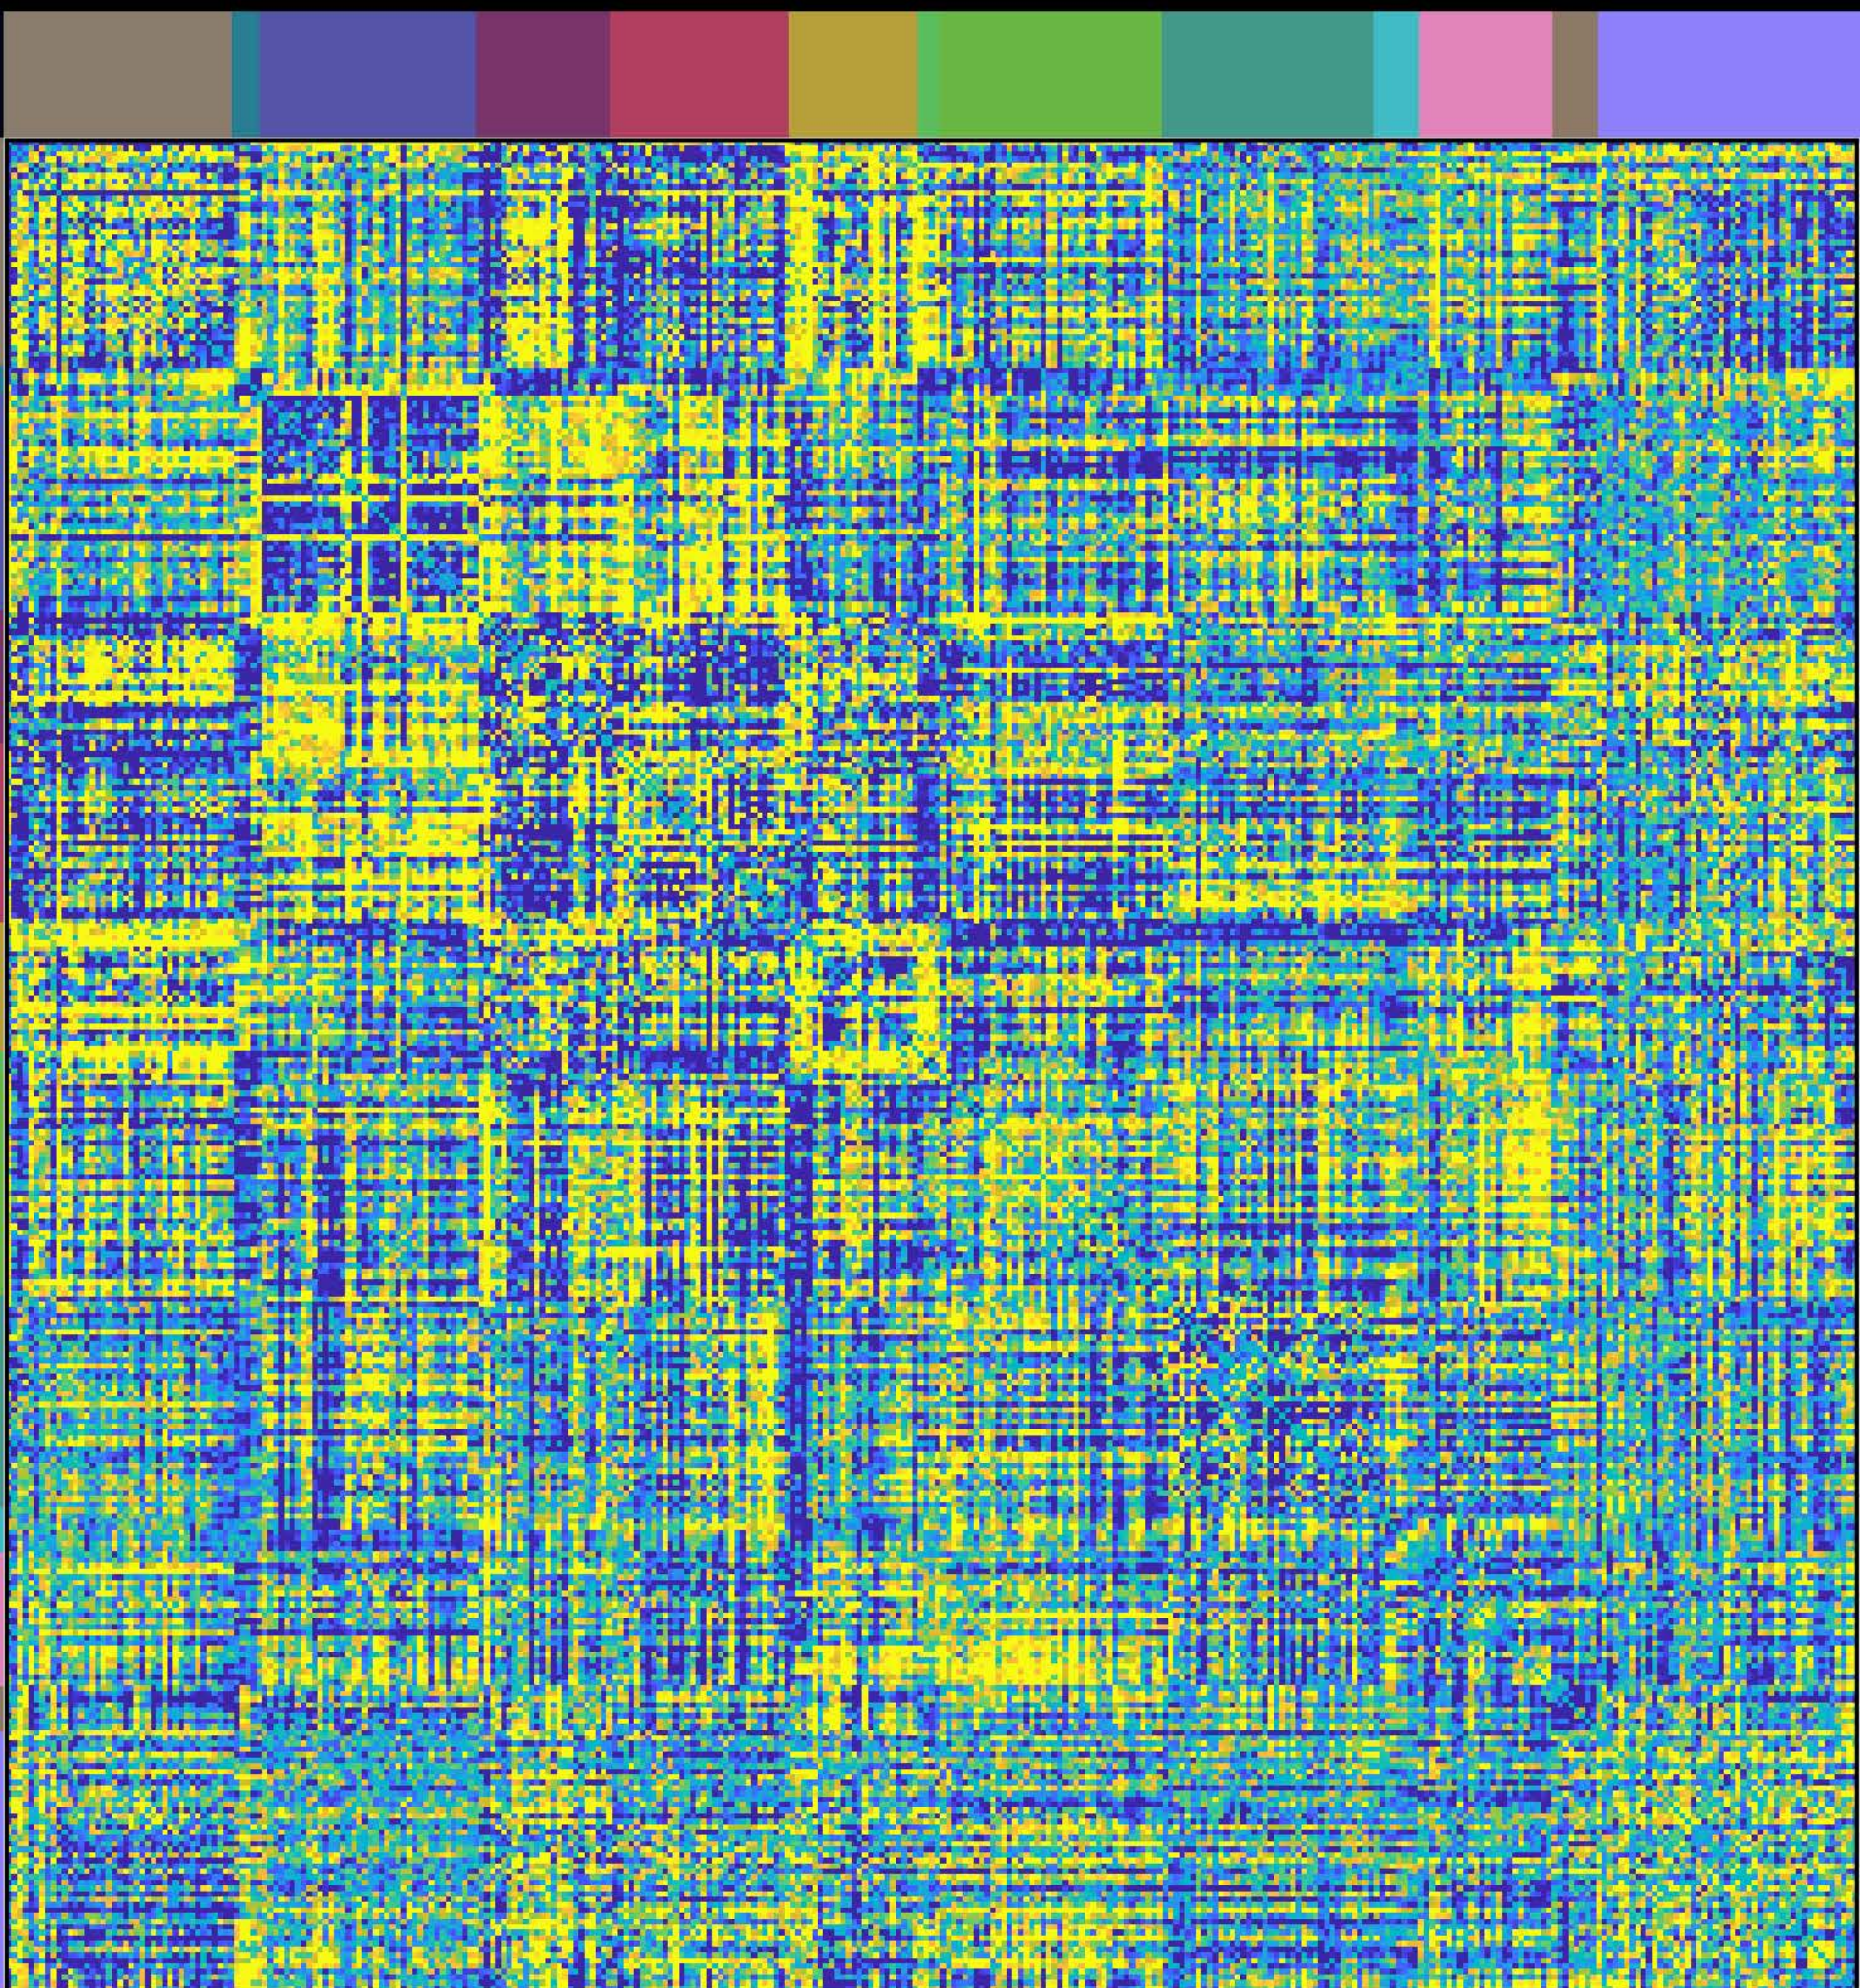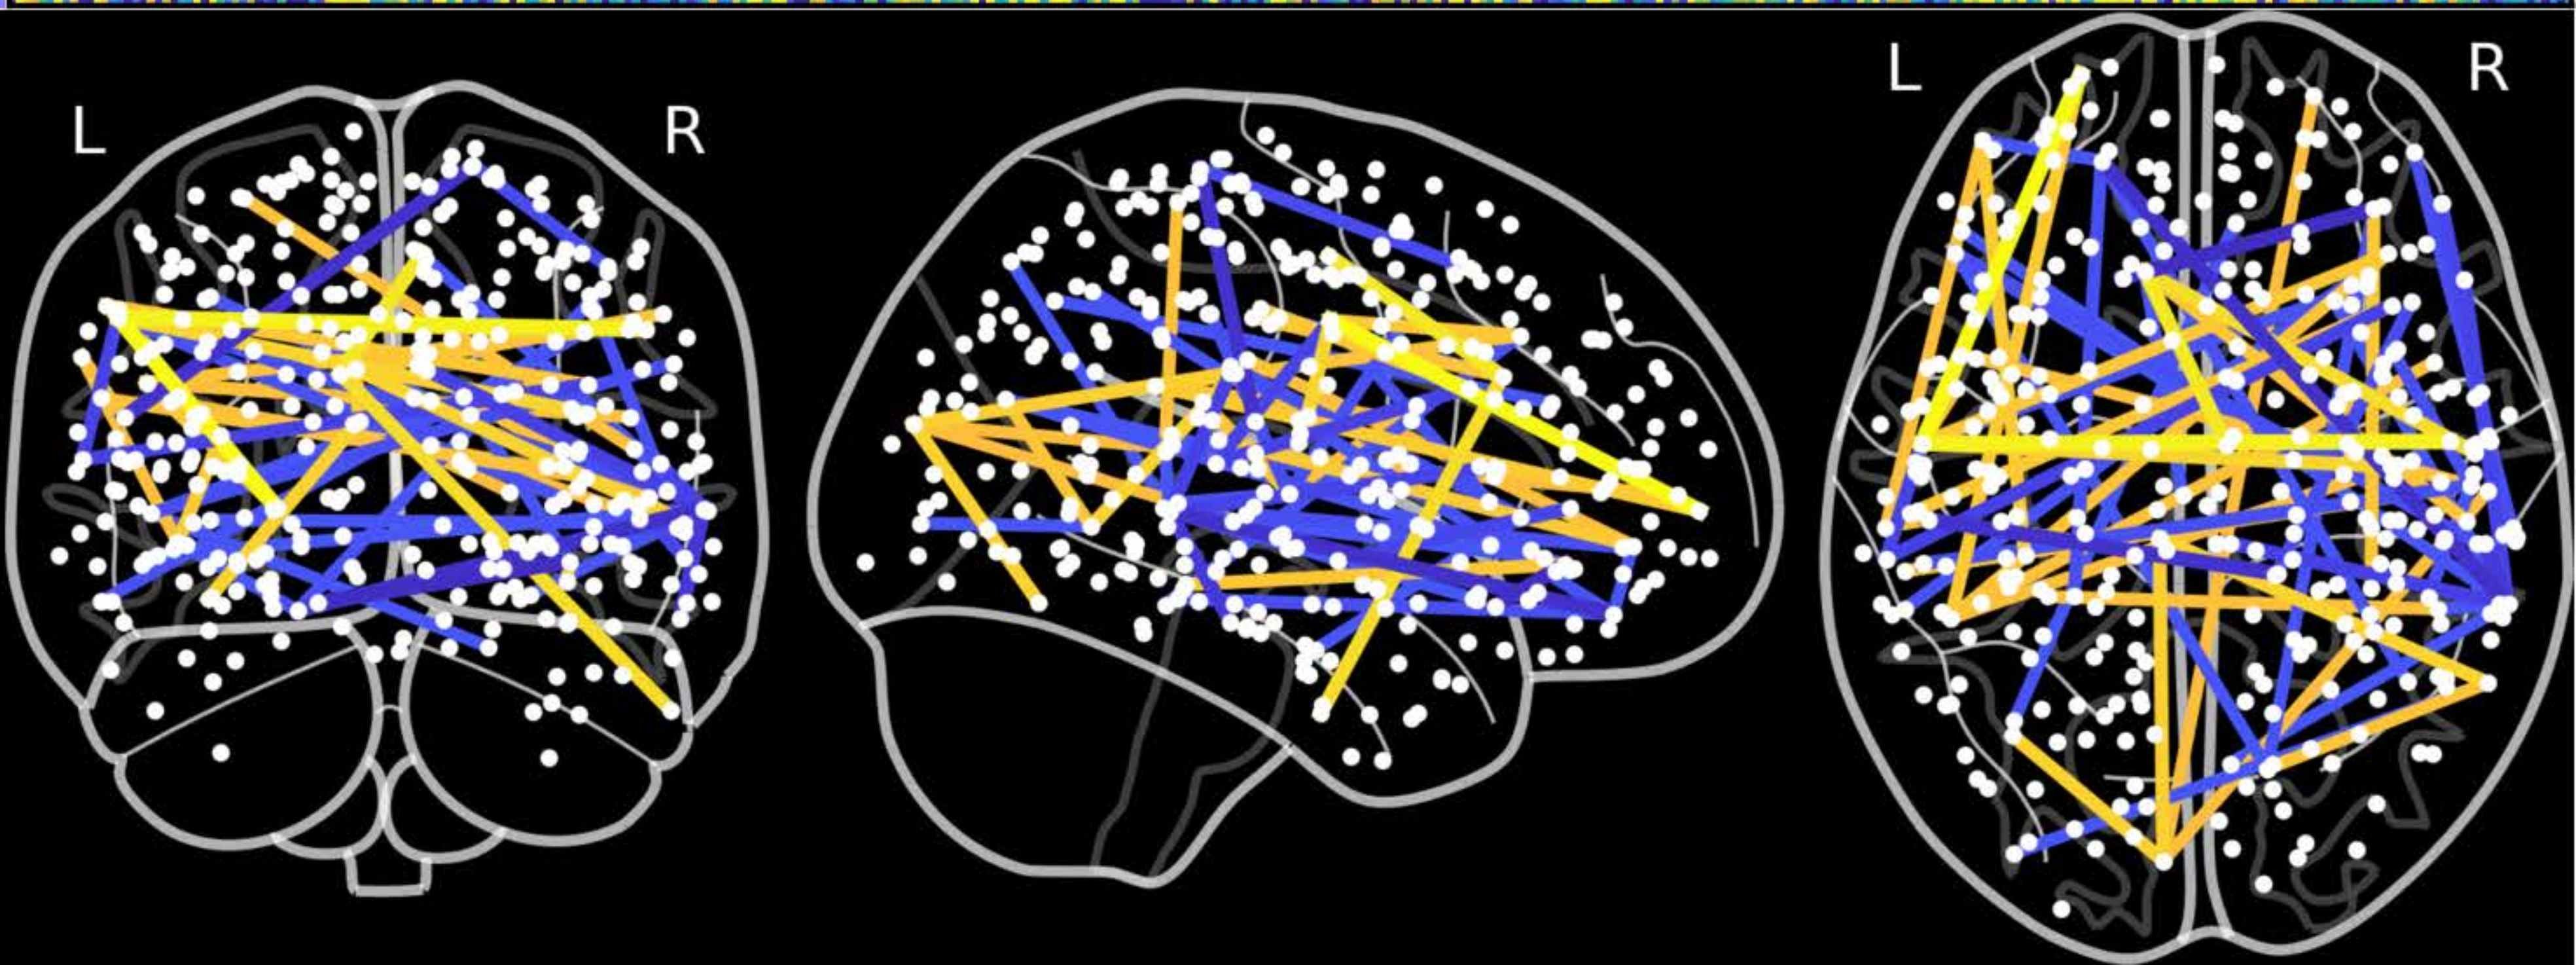



component\_29

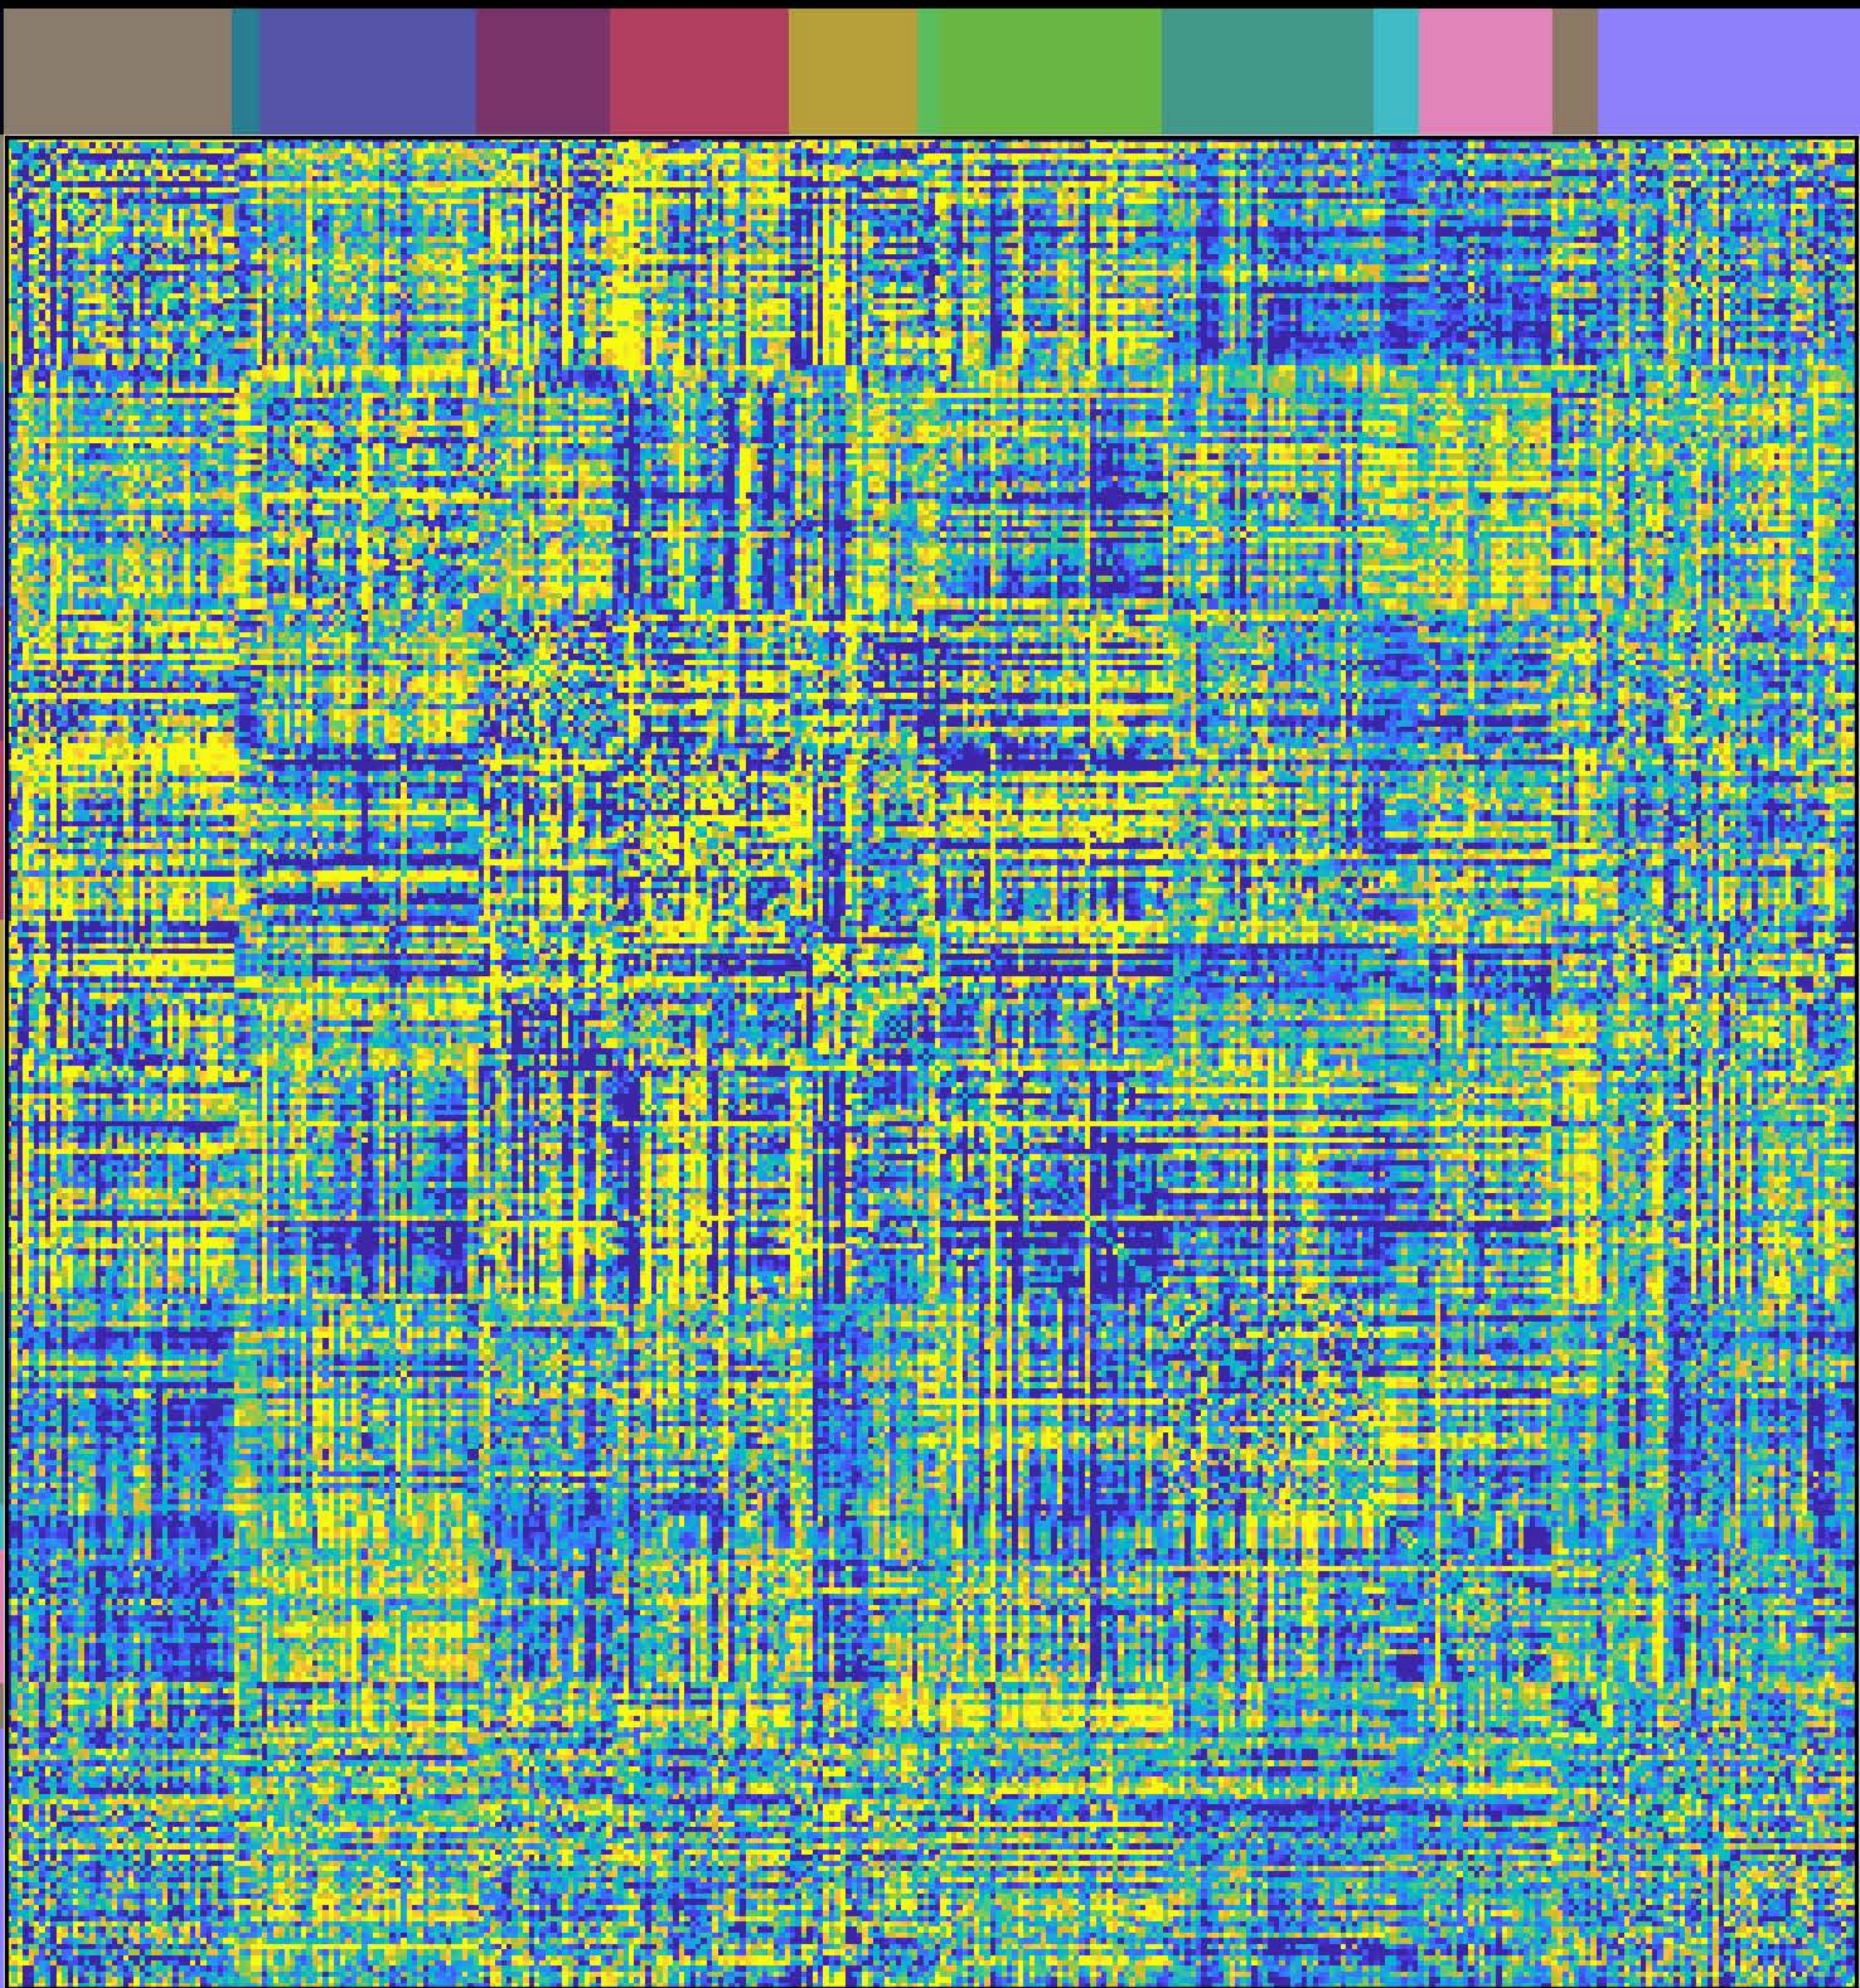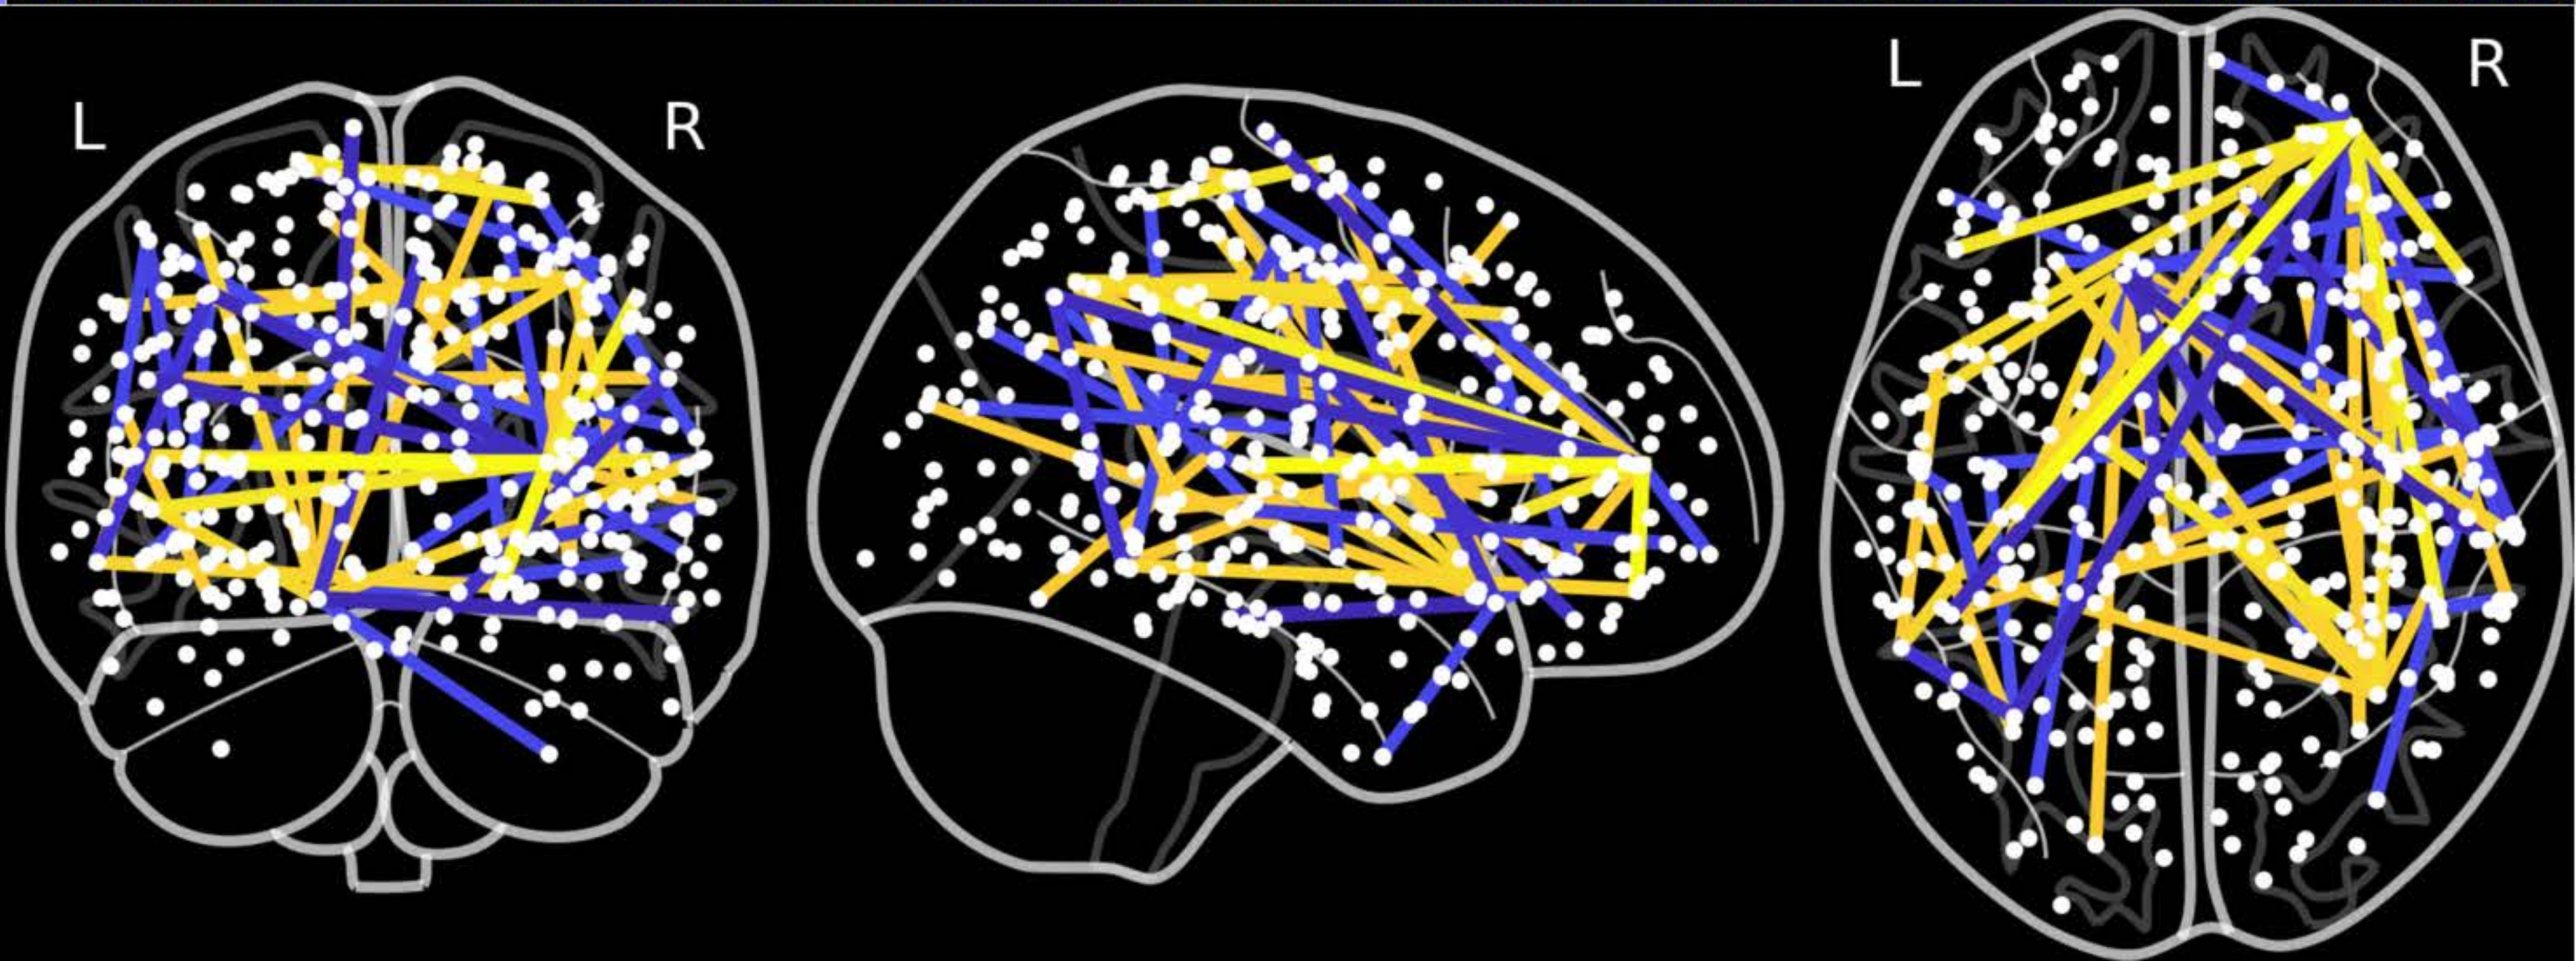



component\_30

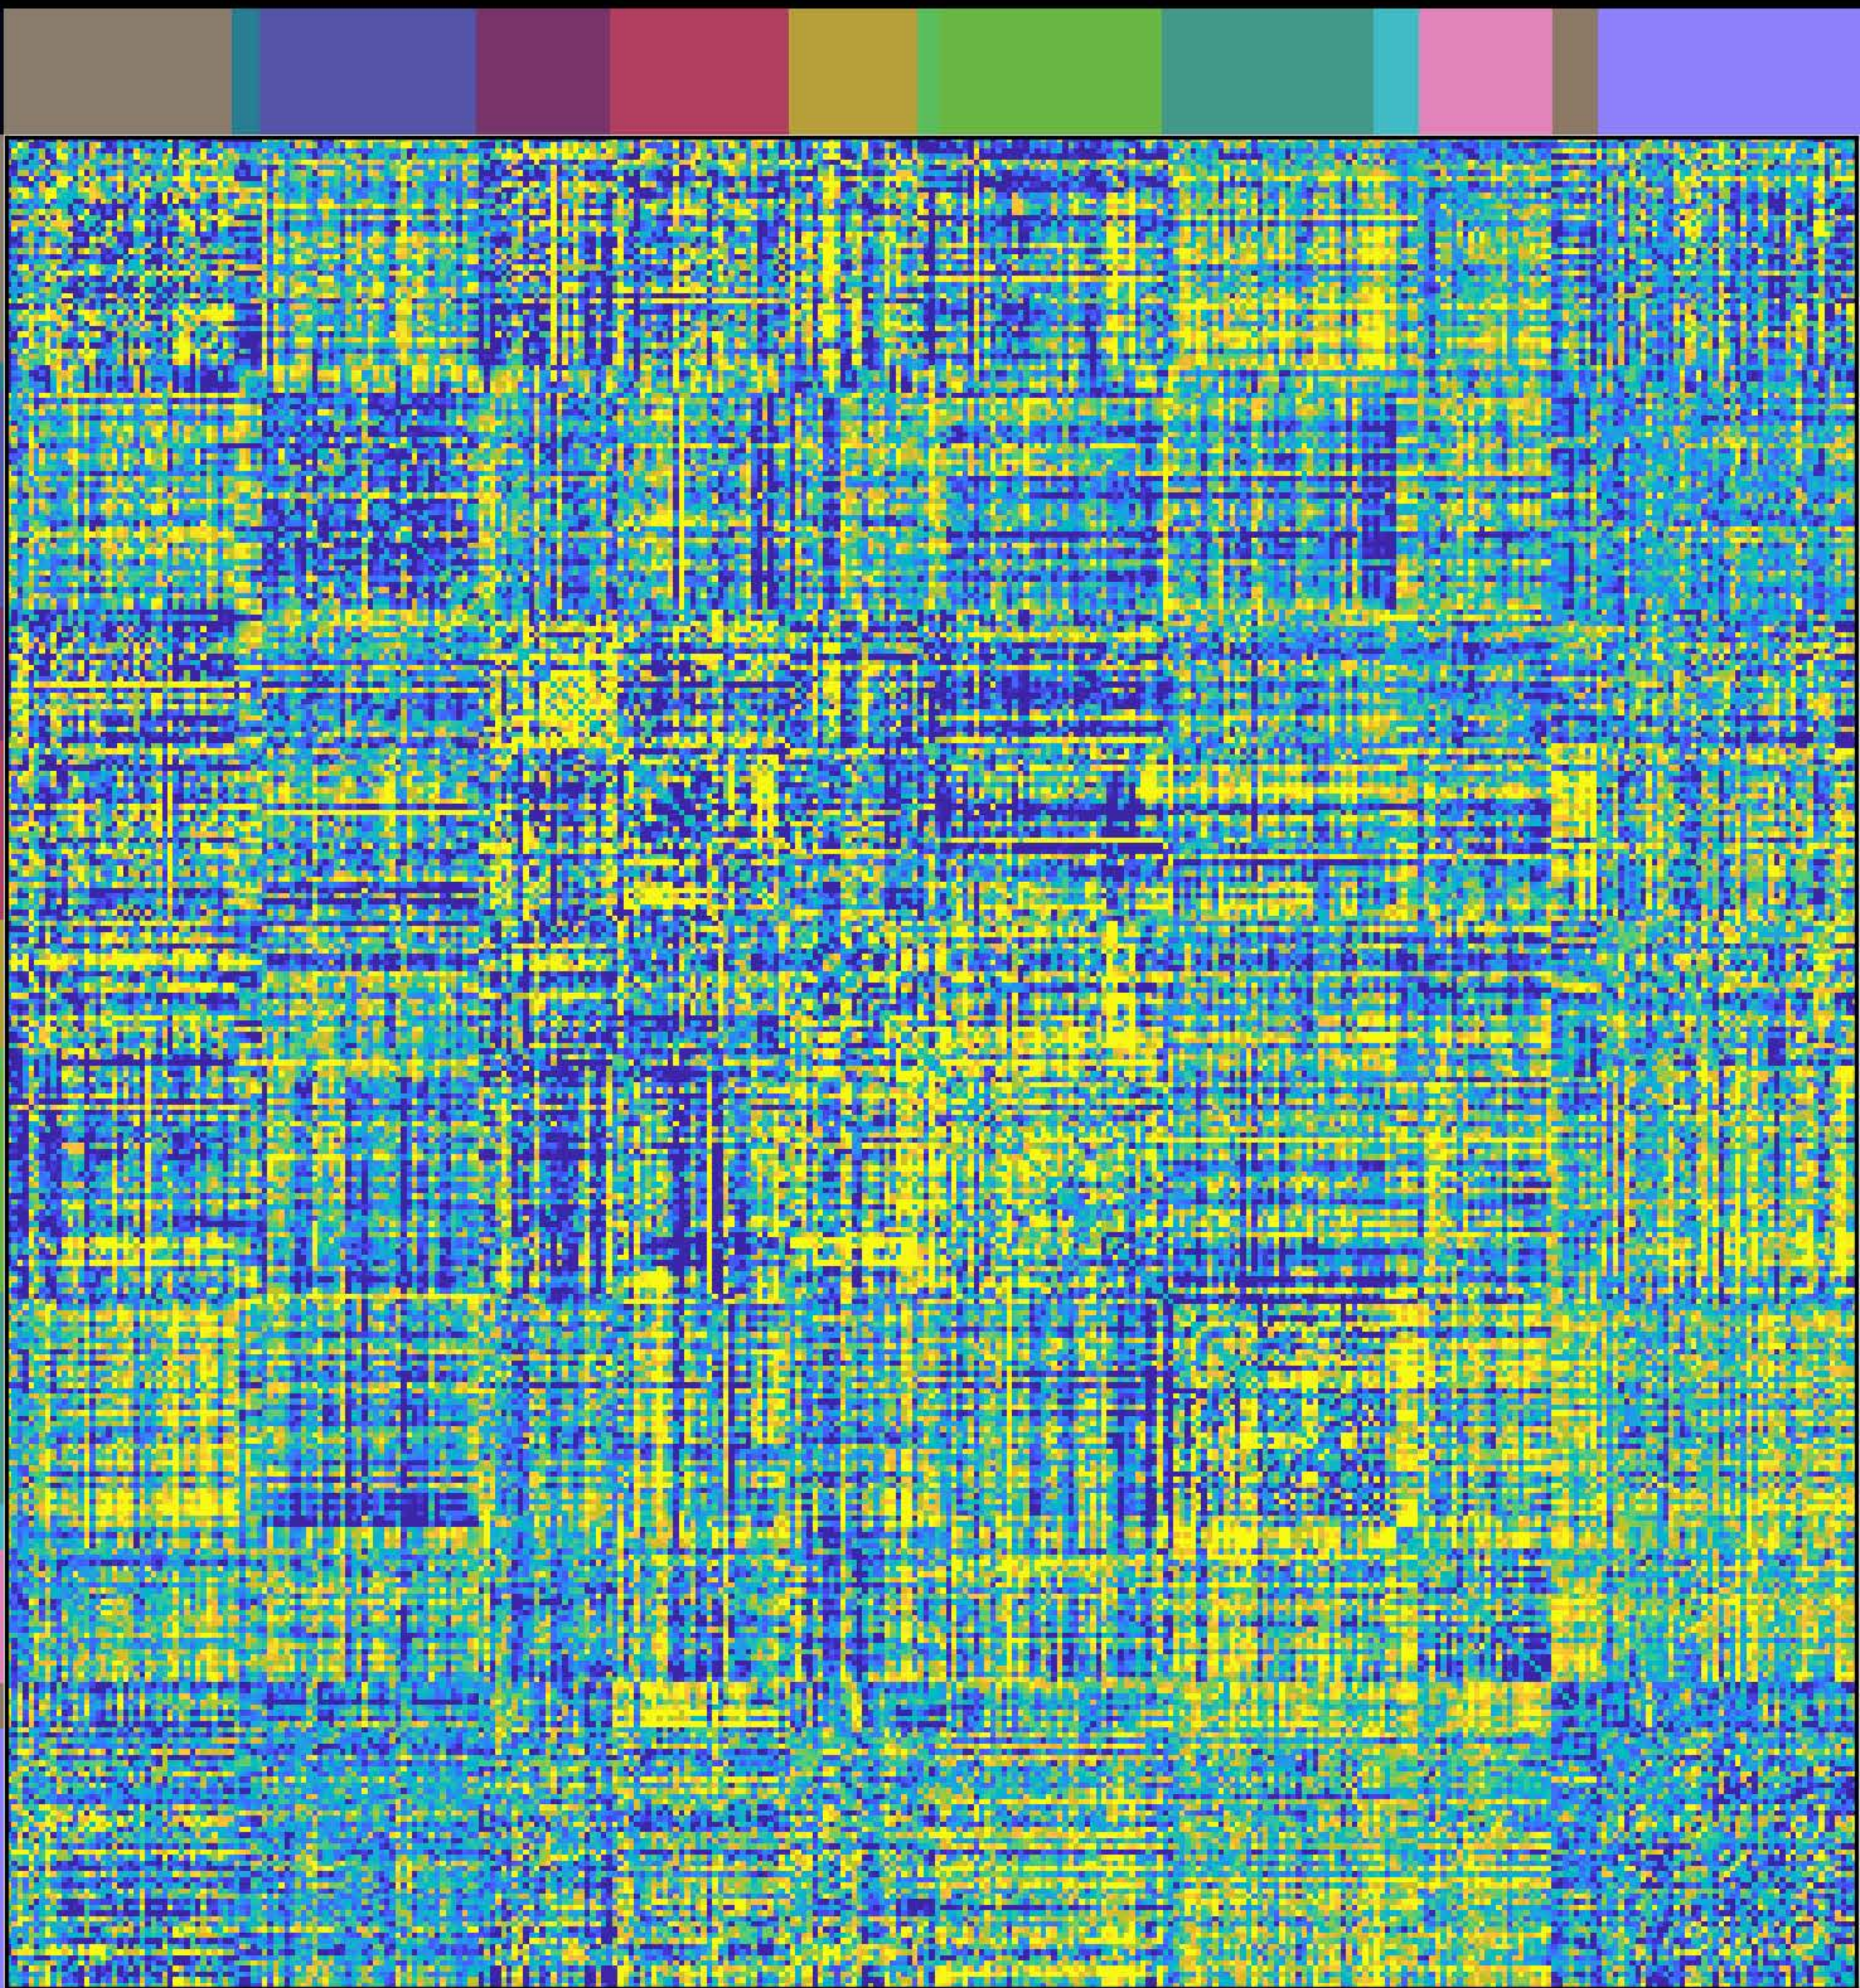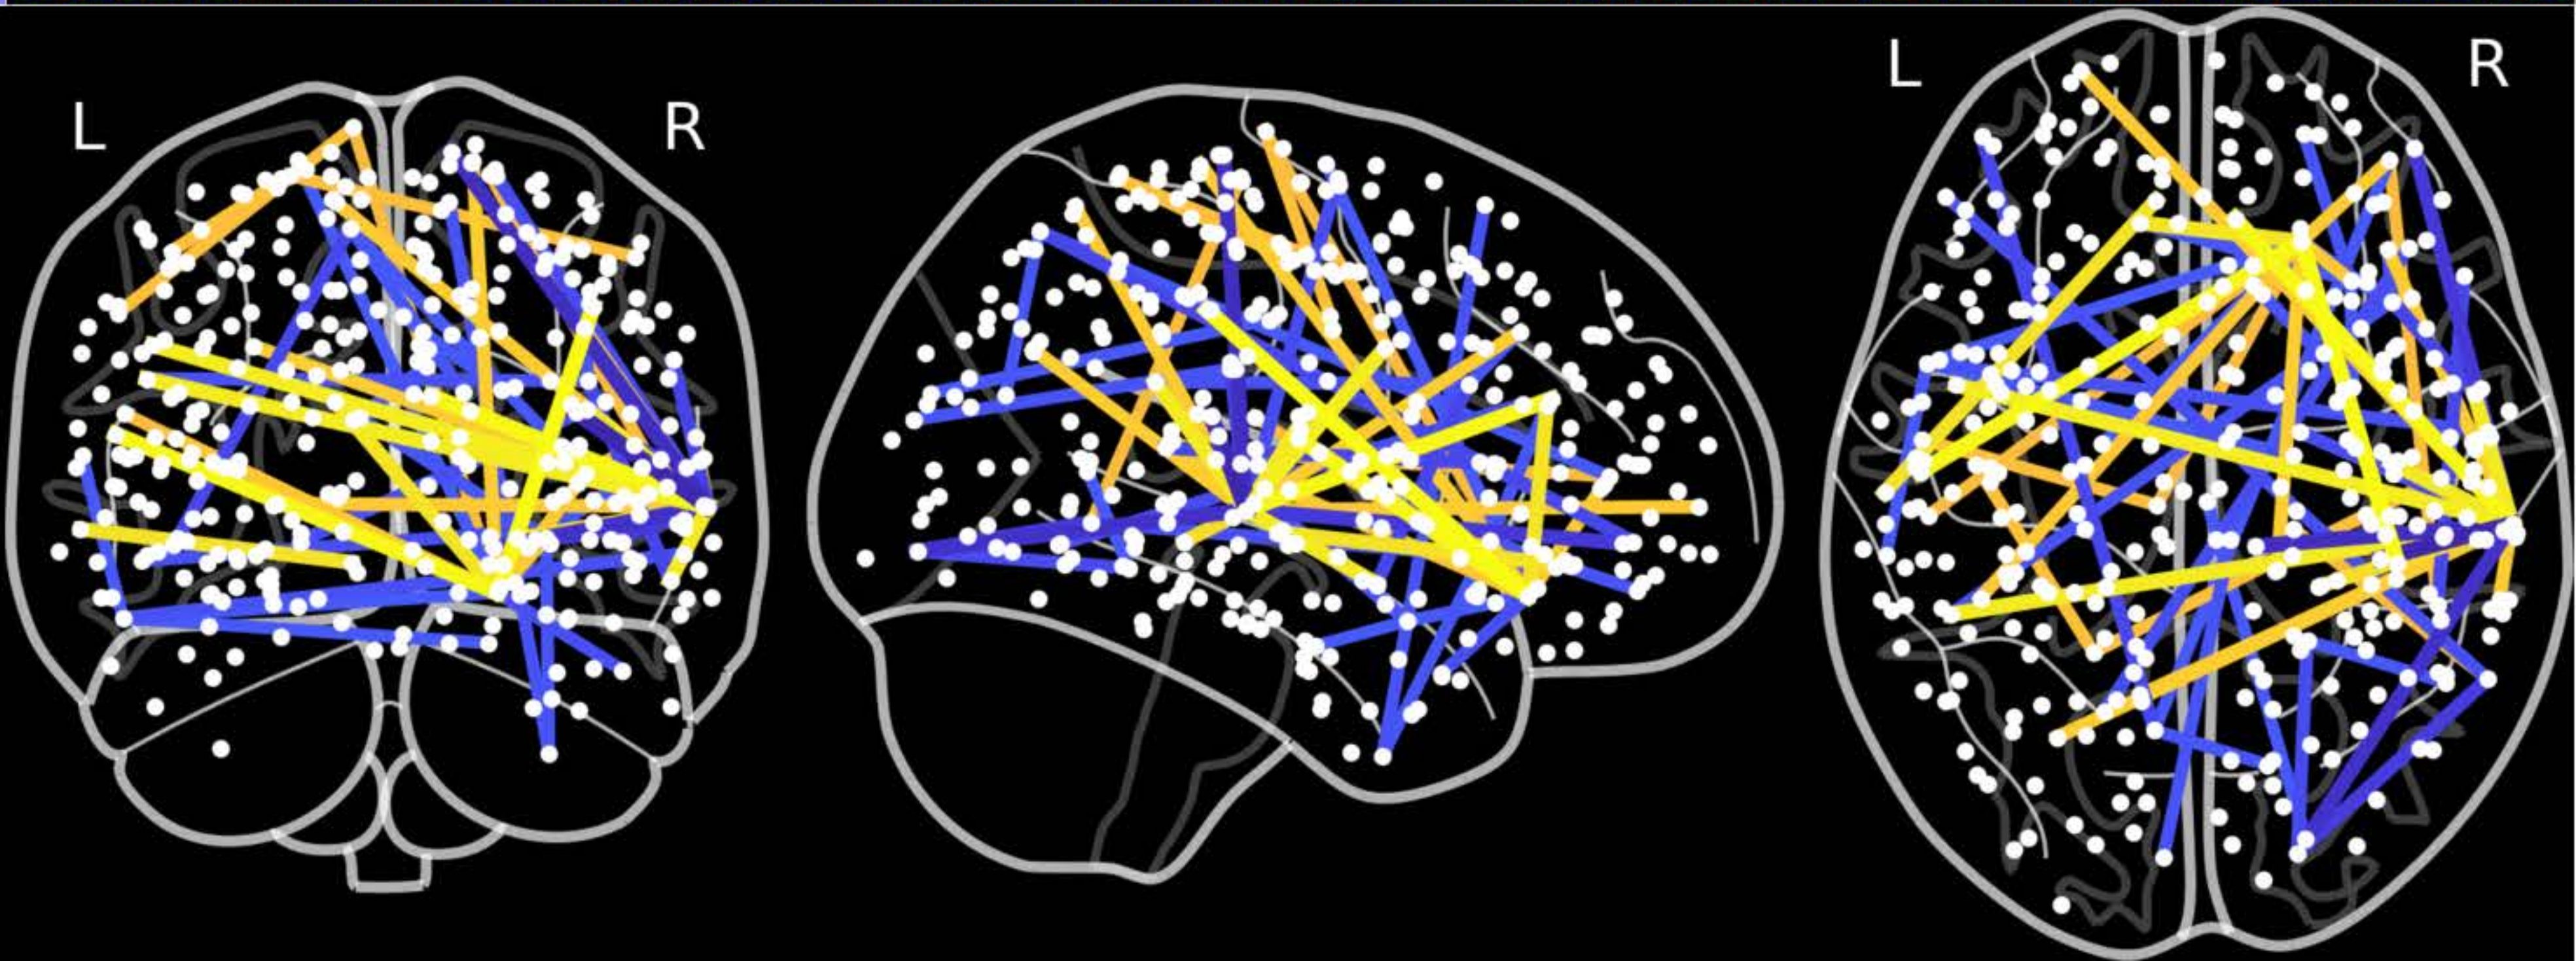



component\_31

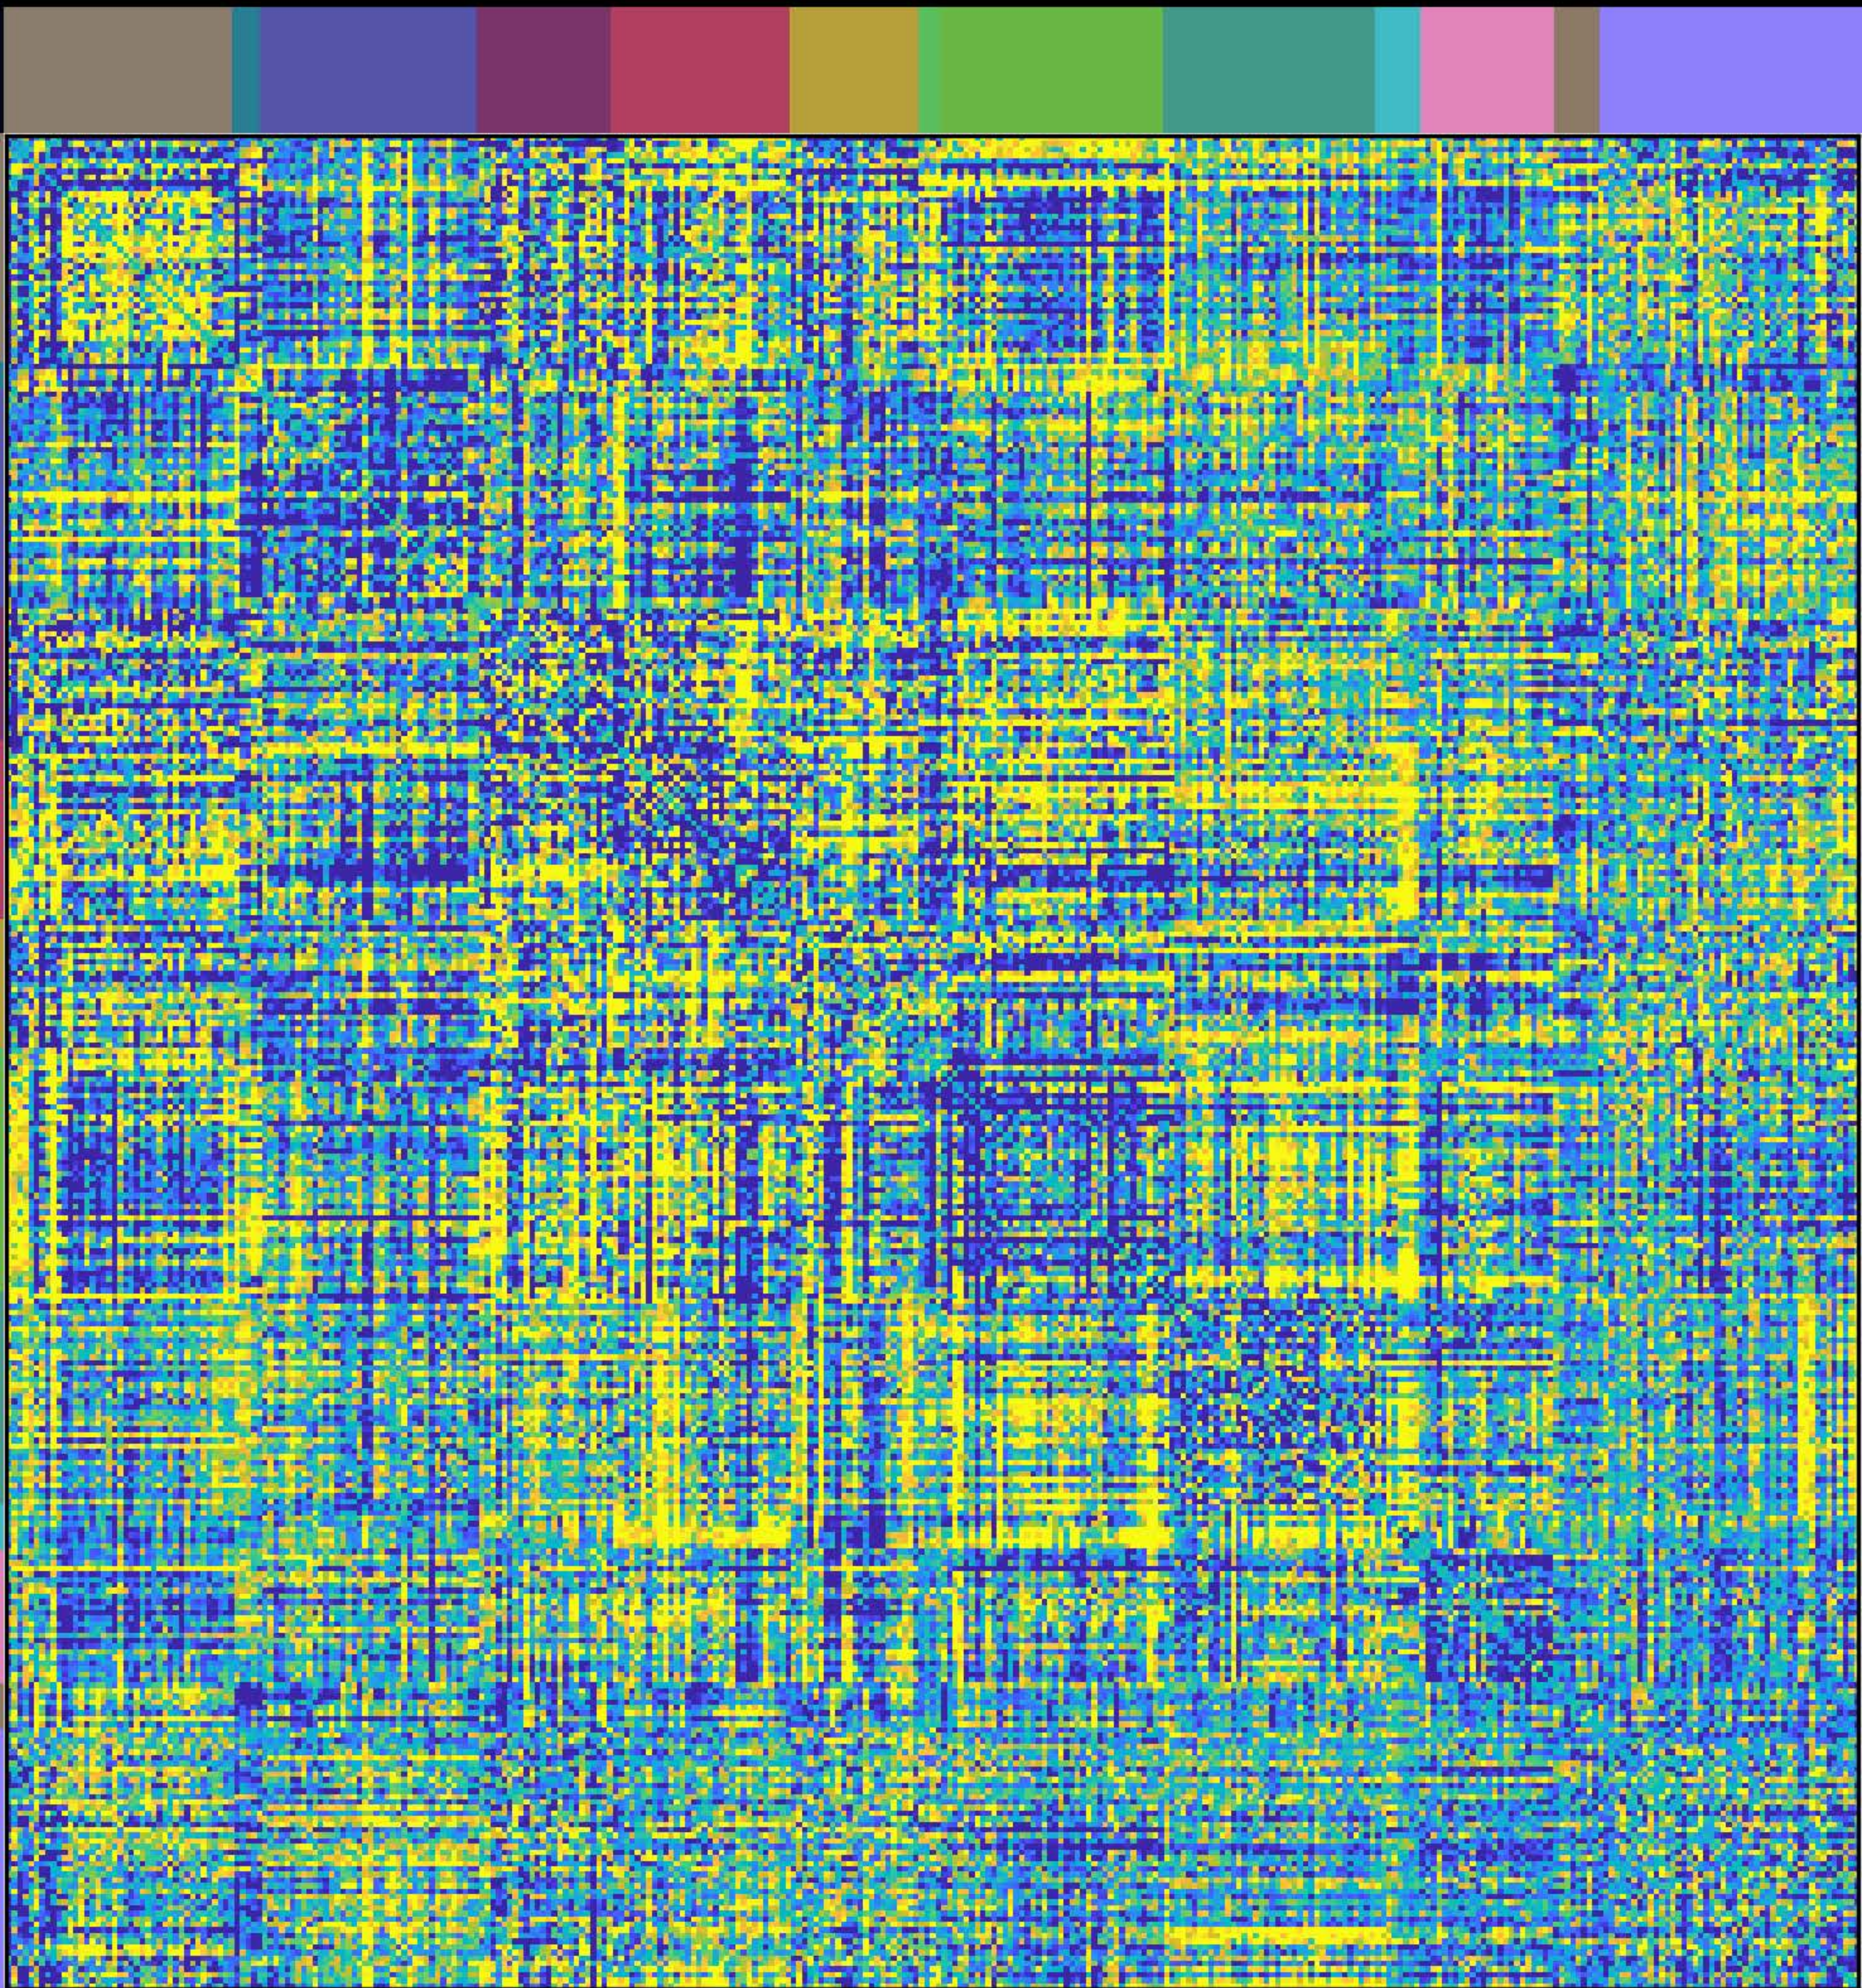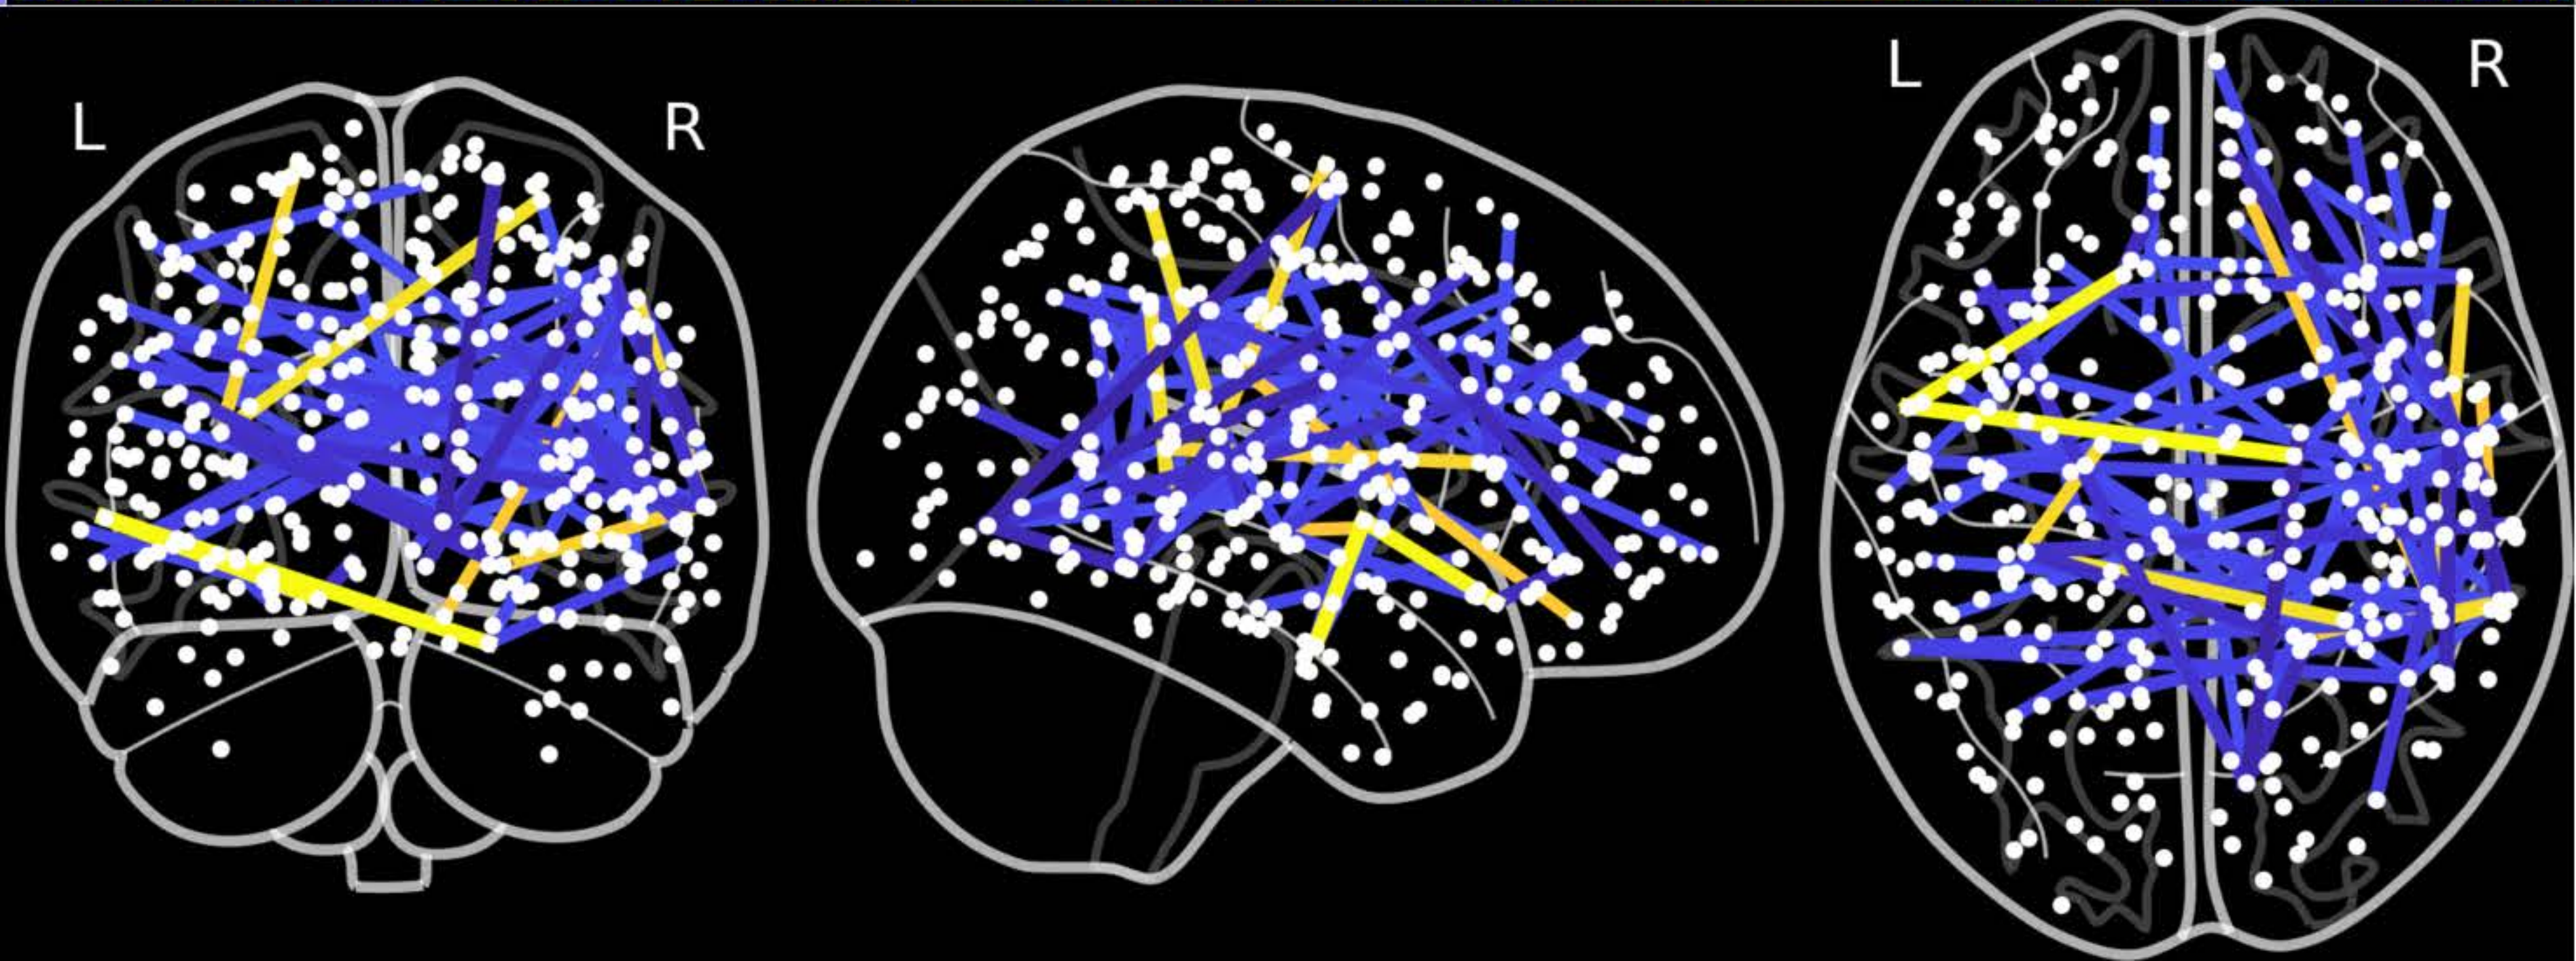



component\_32

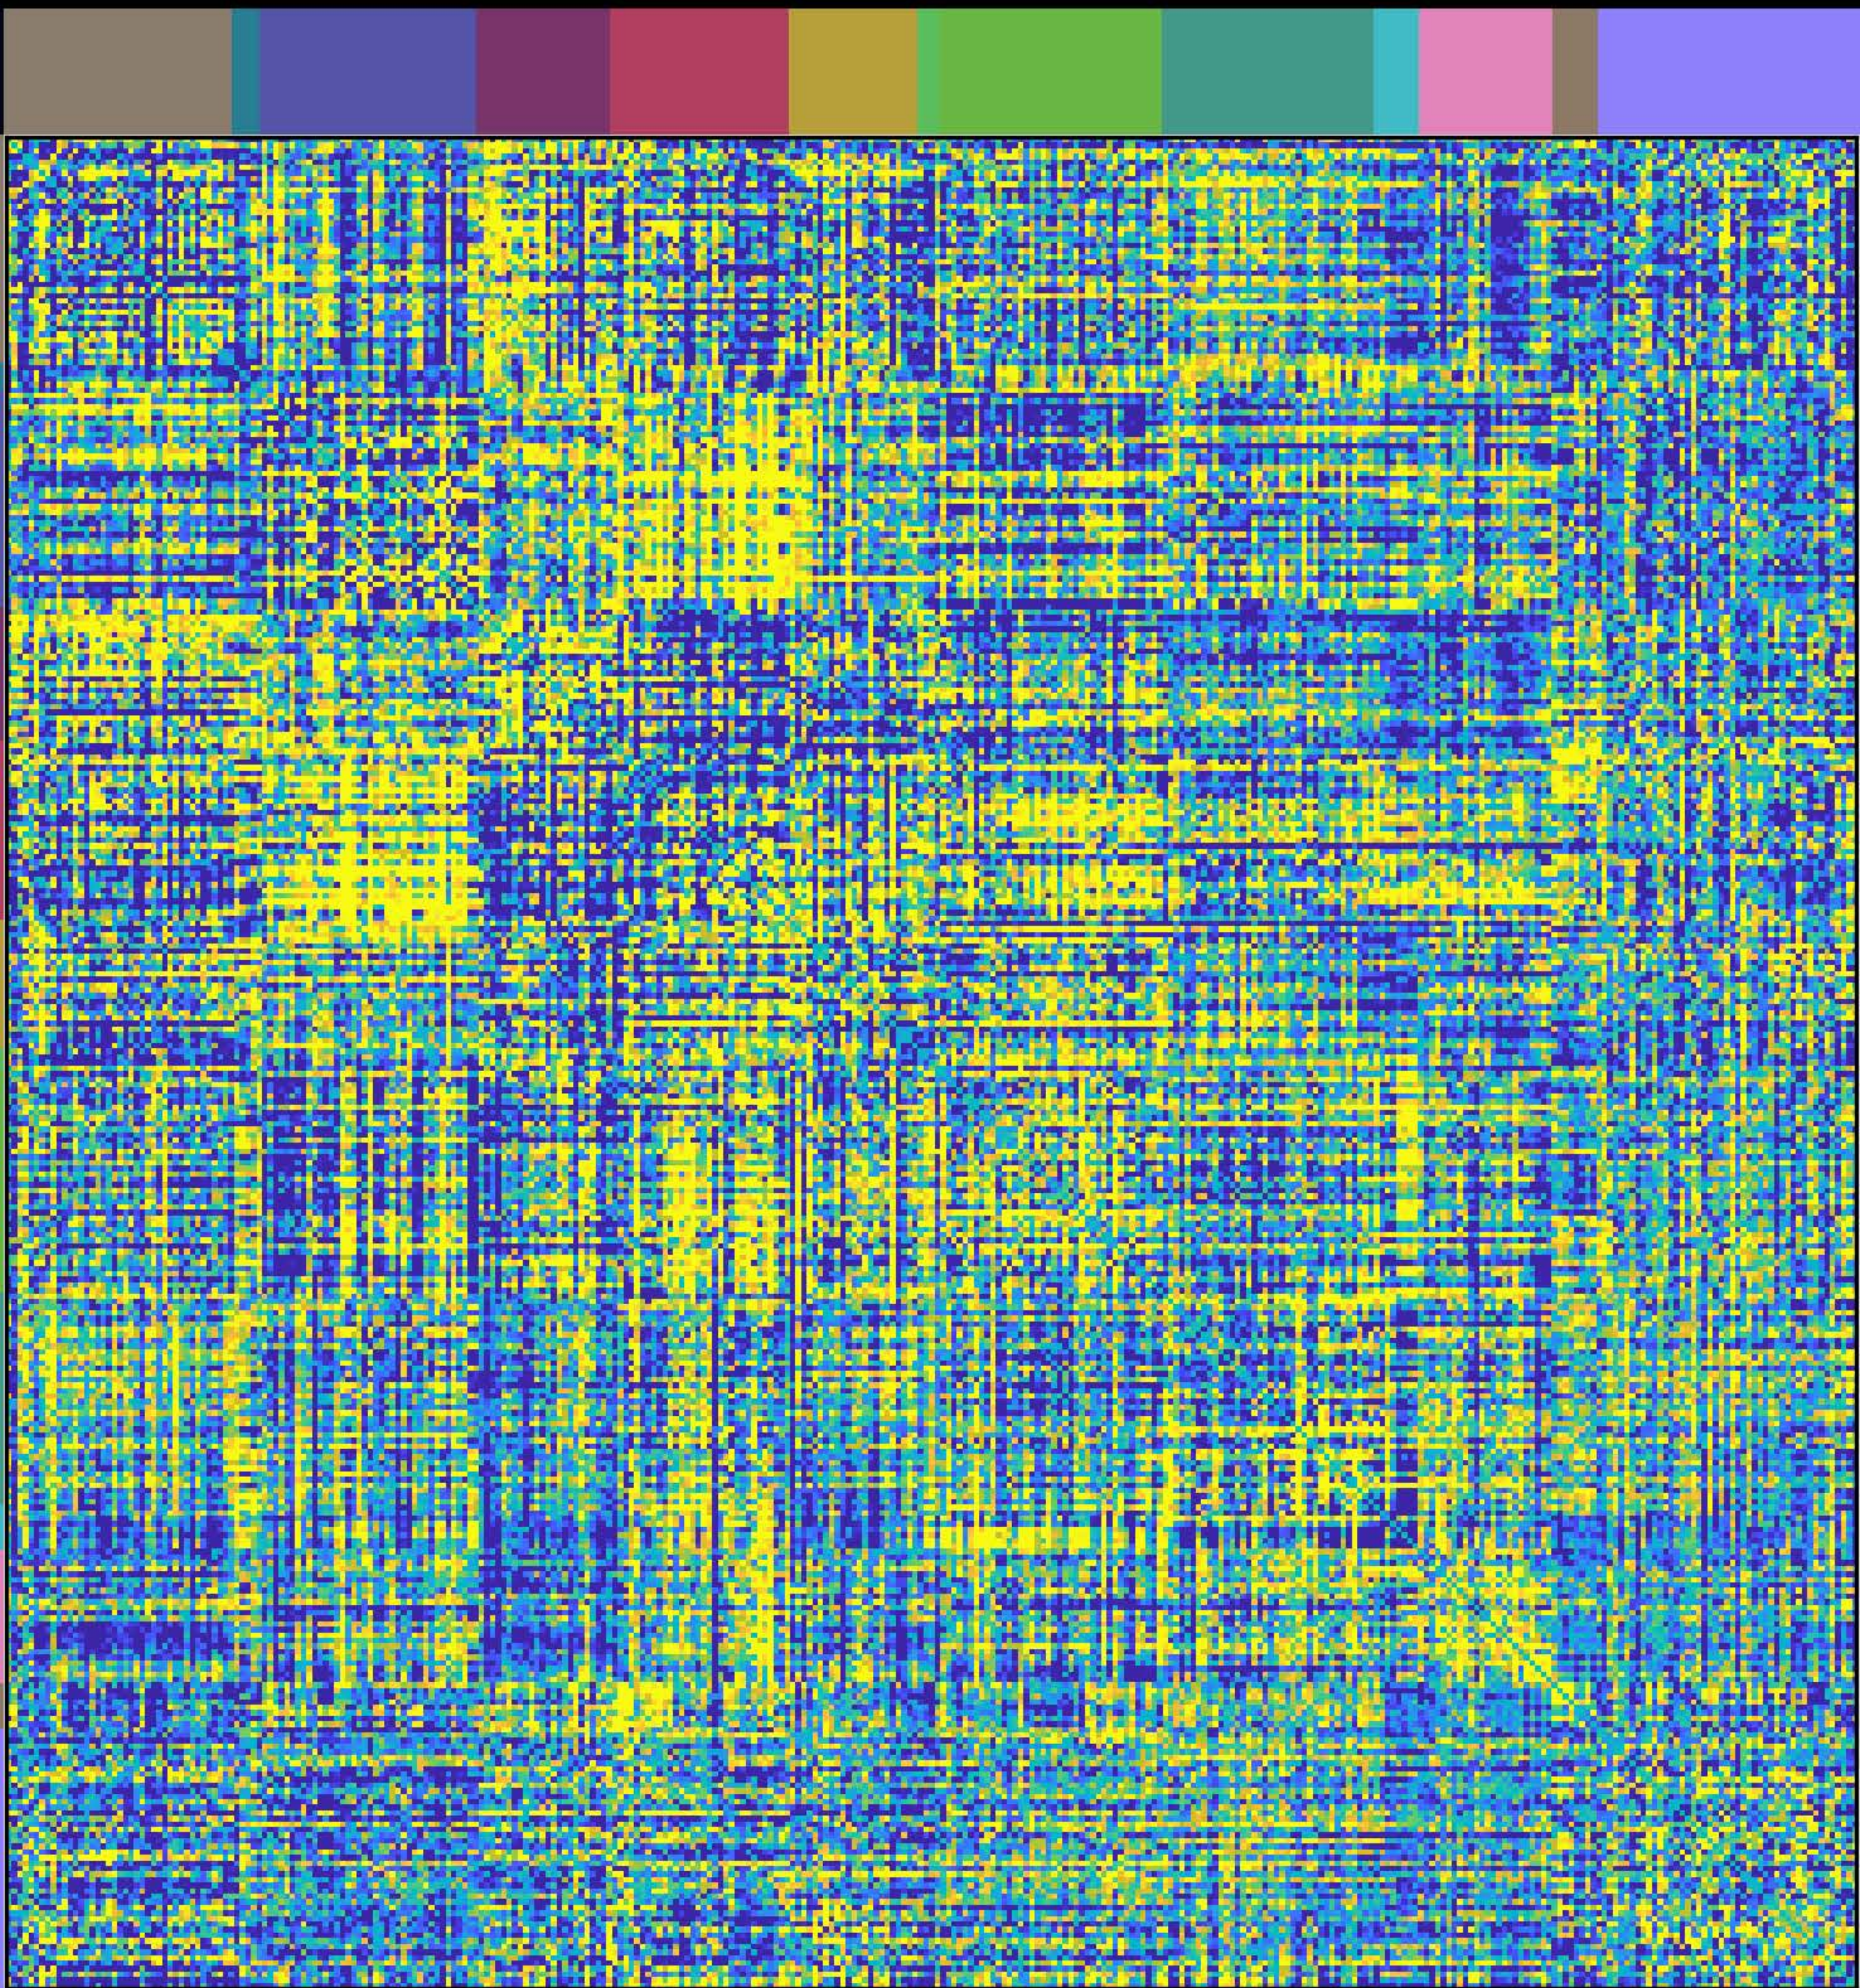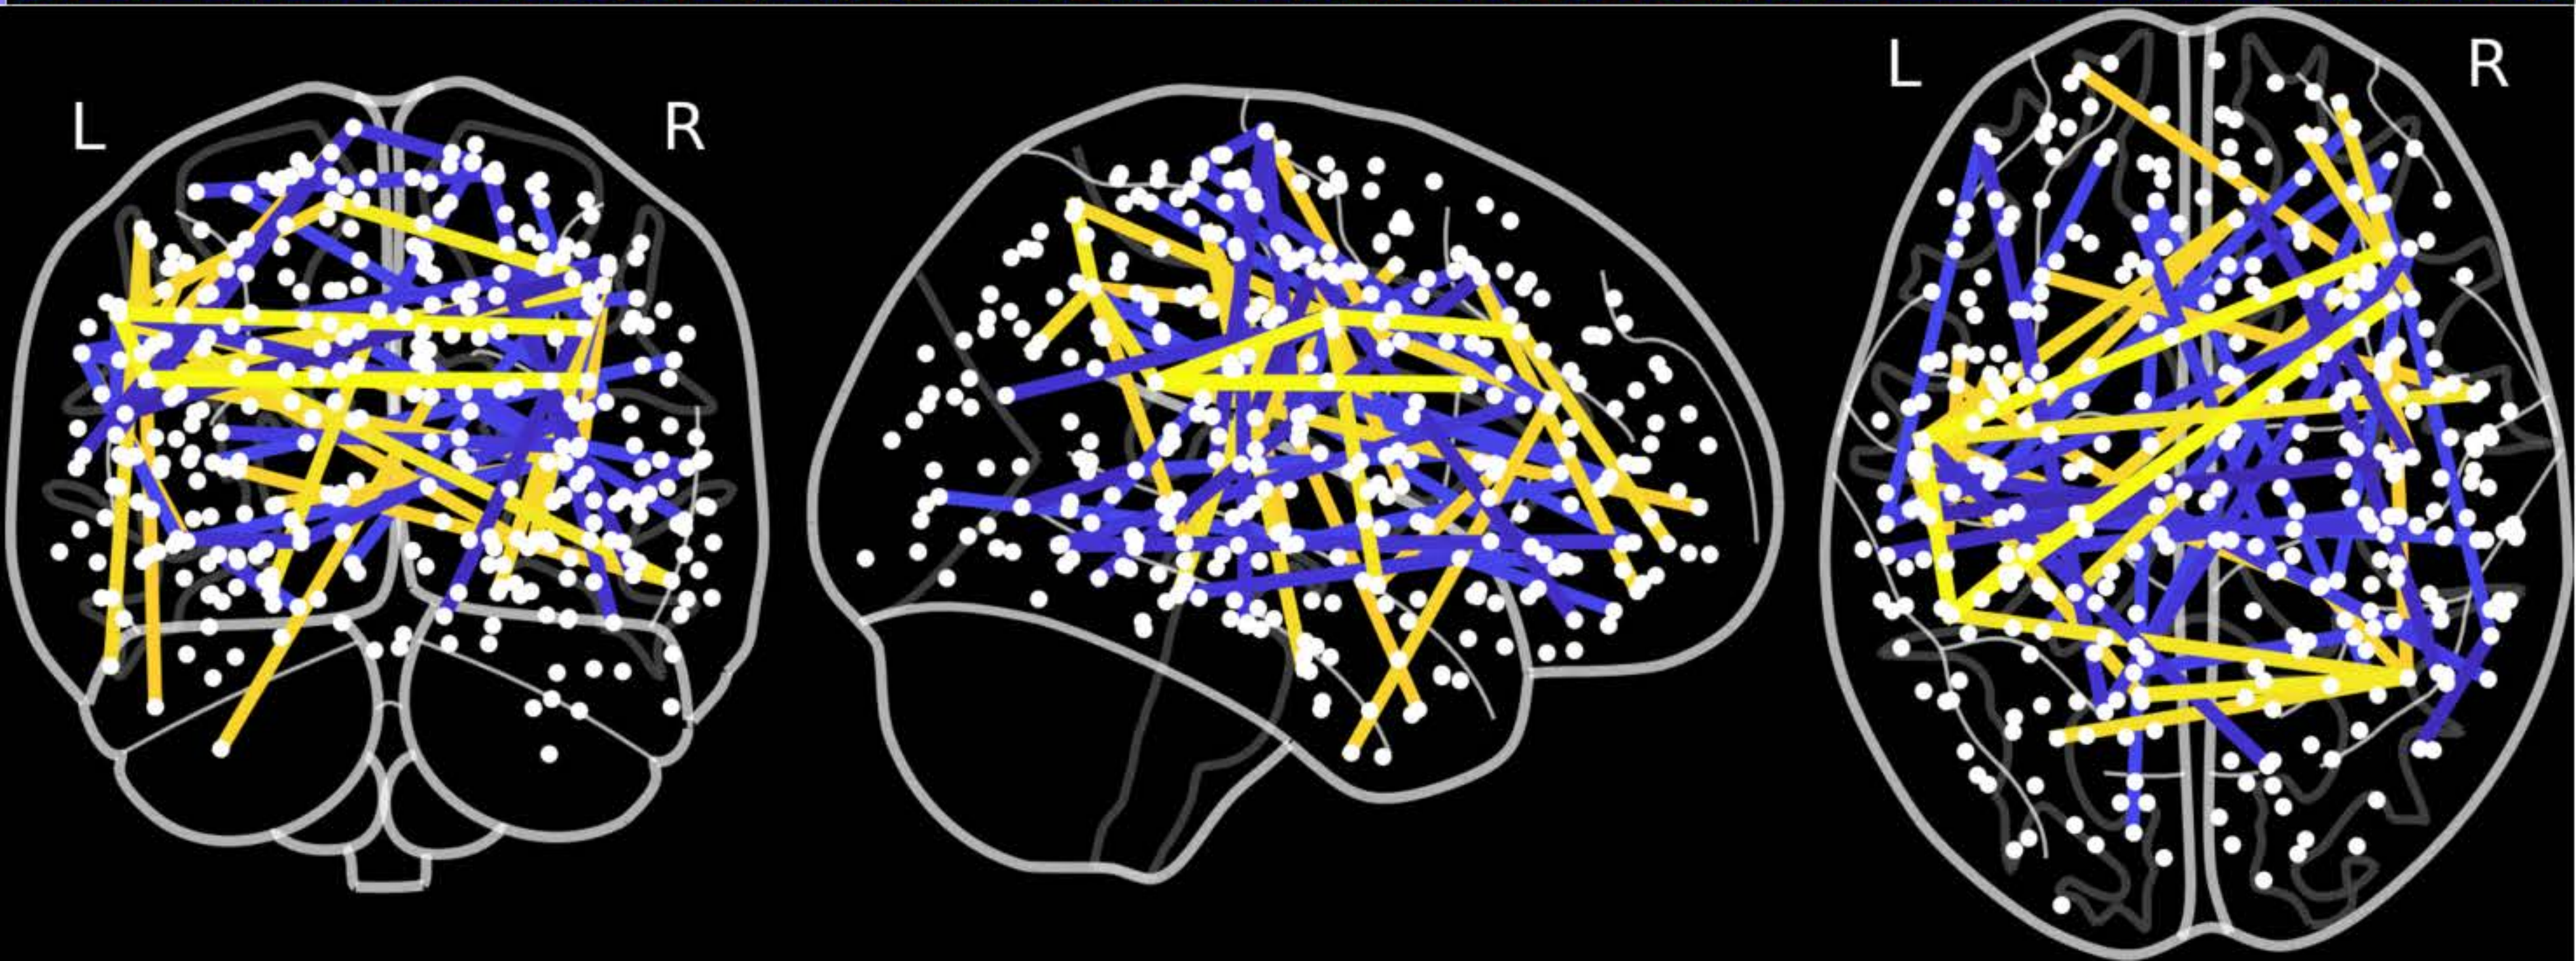



component\_33

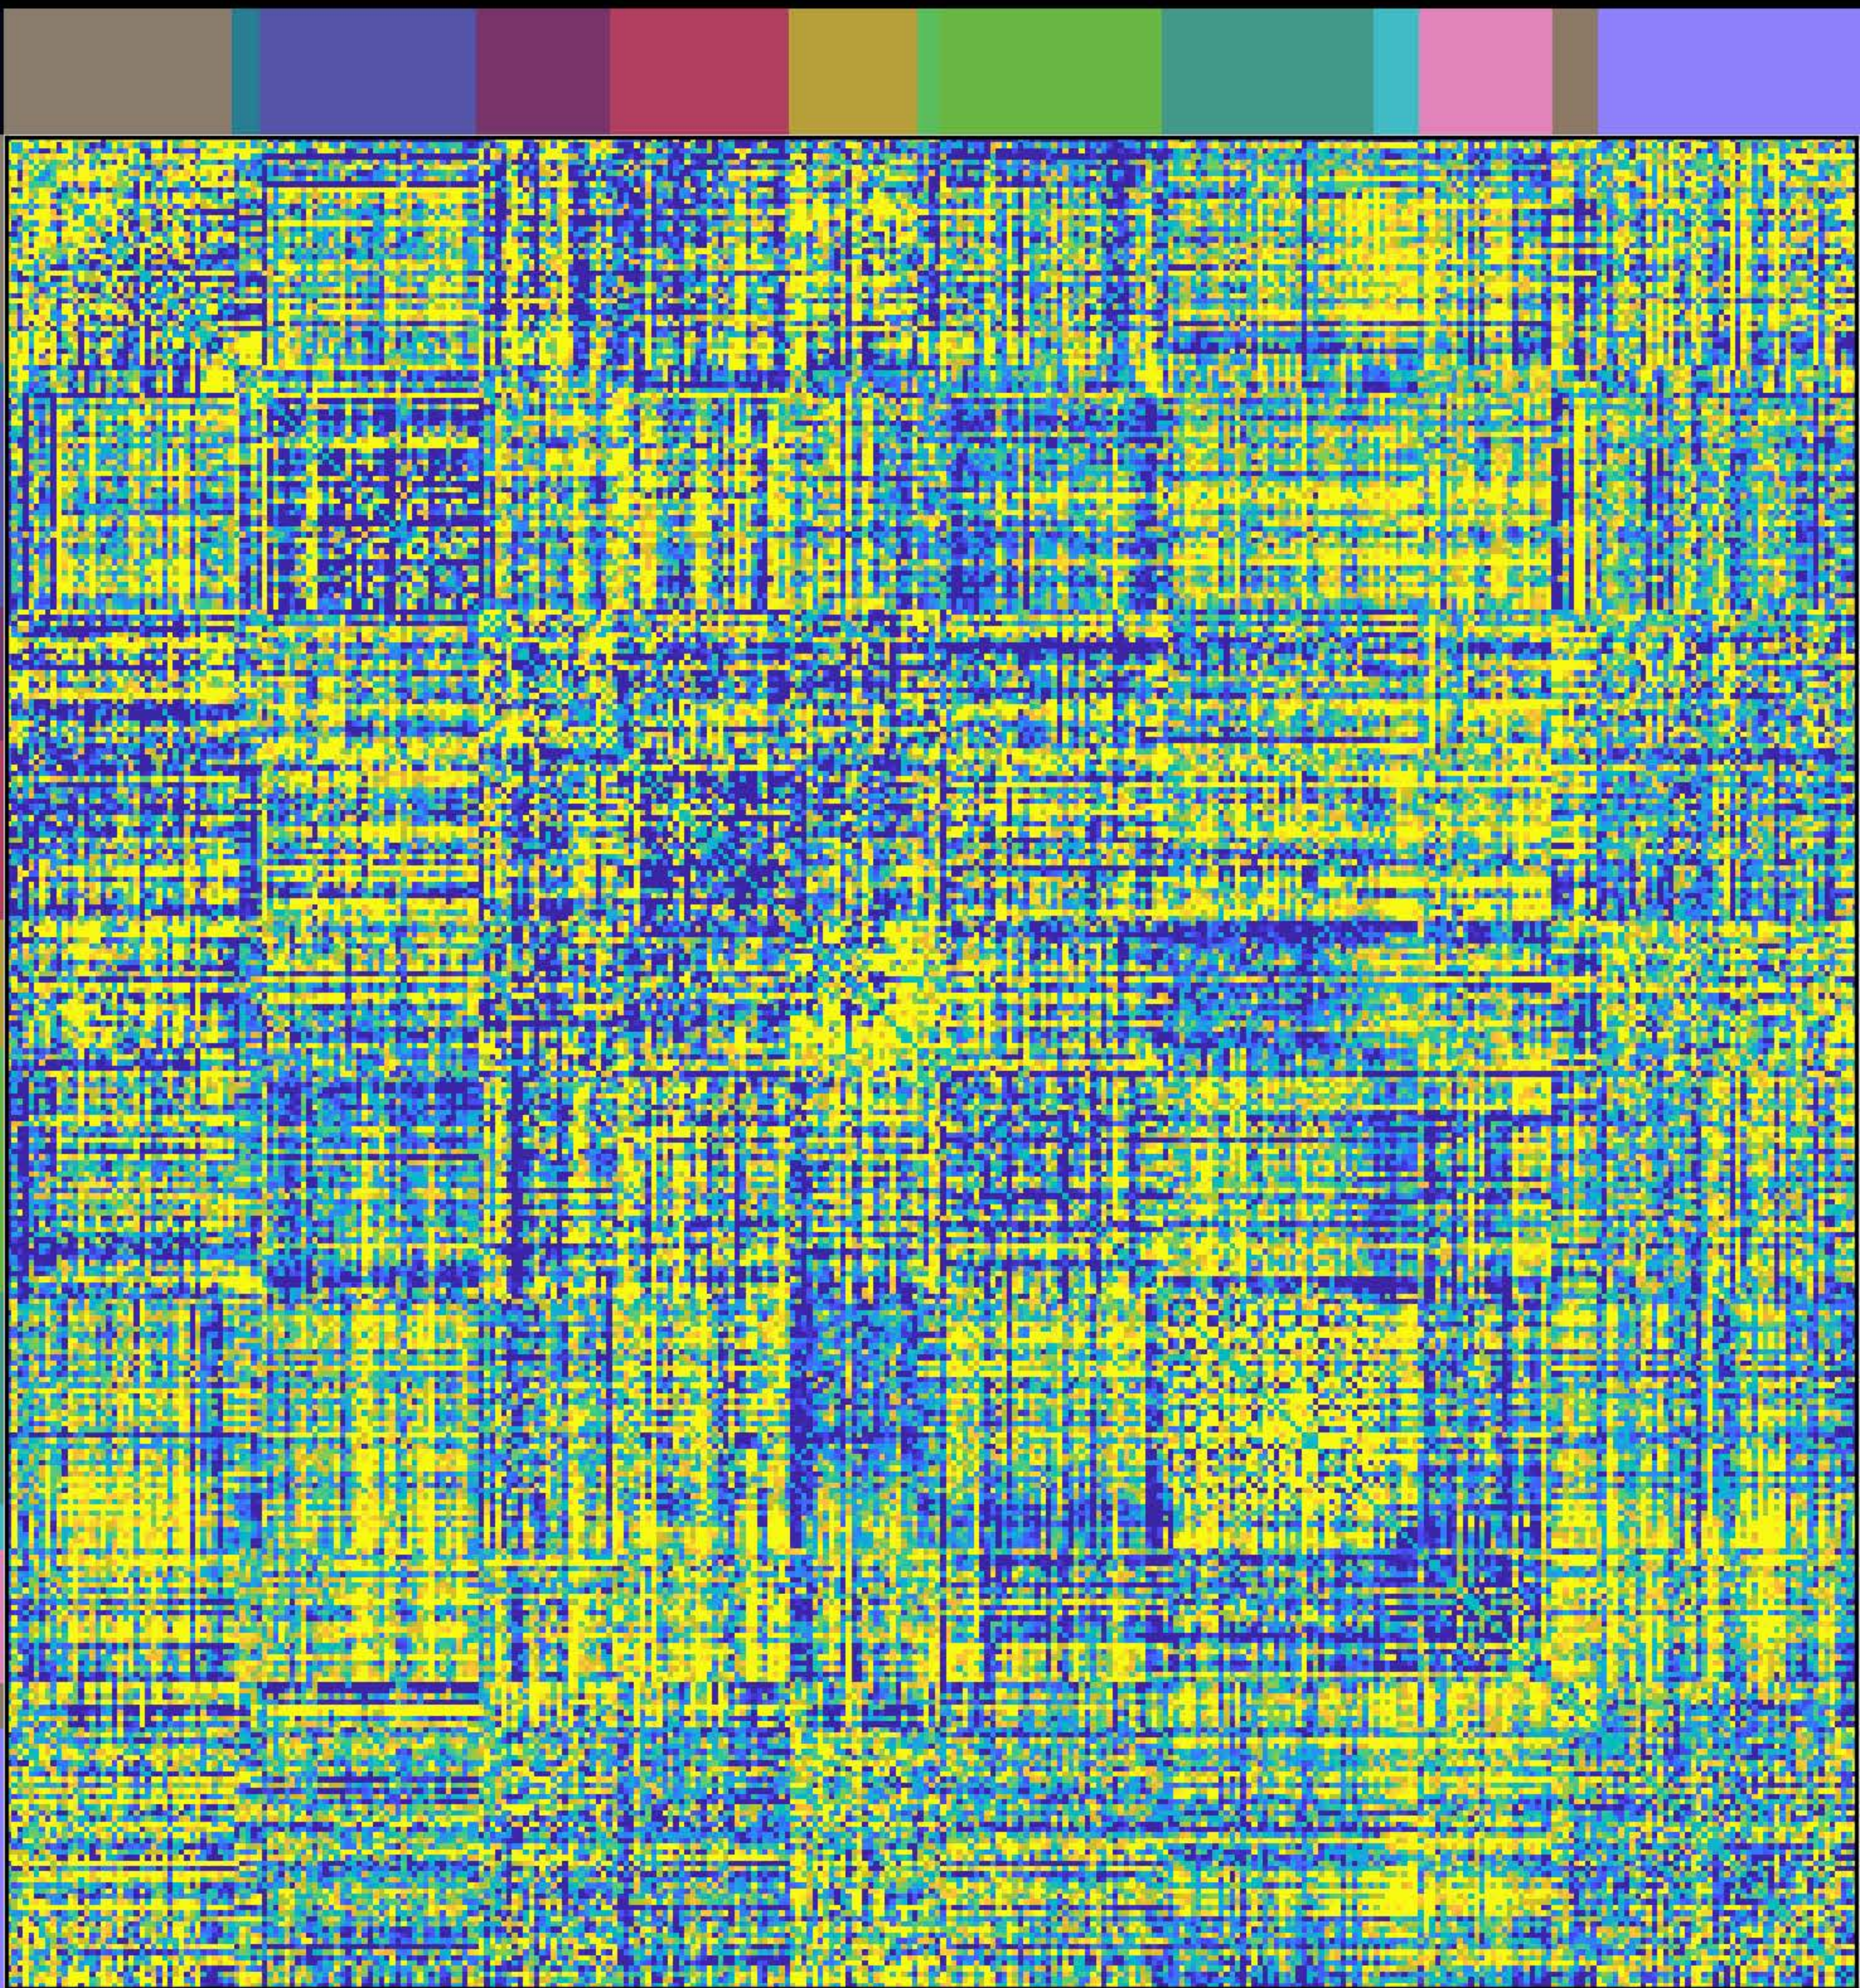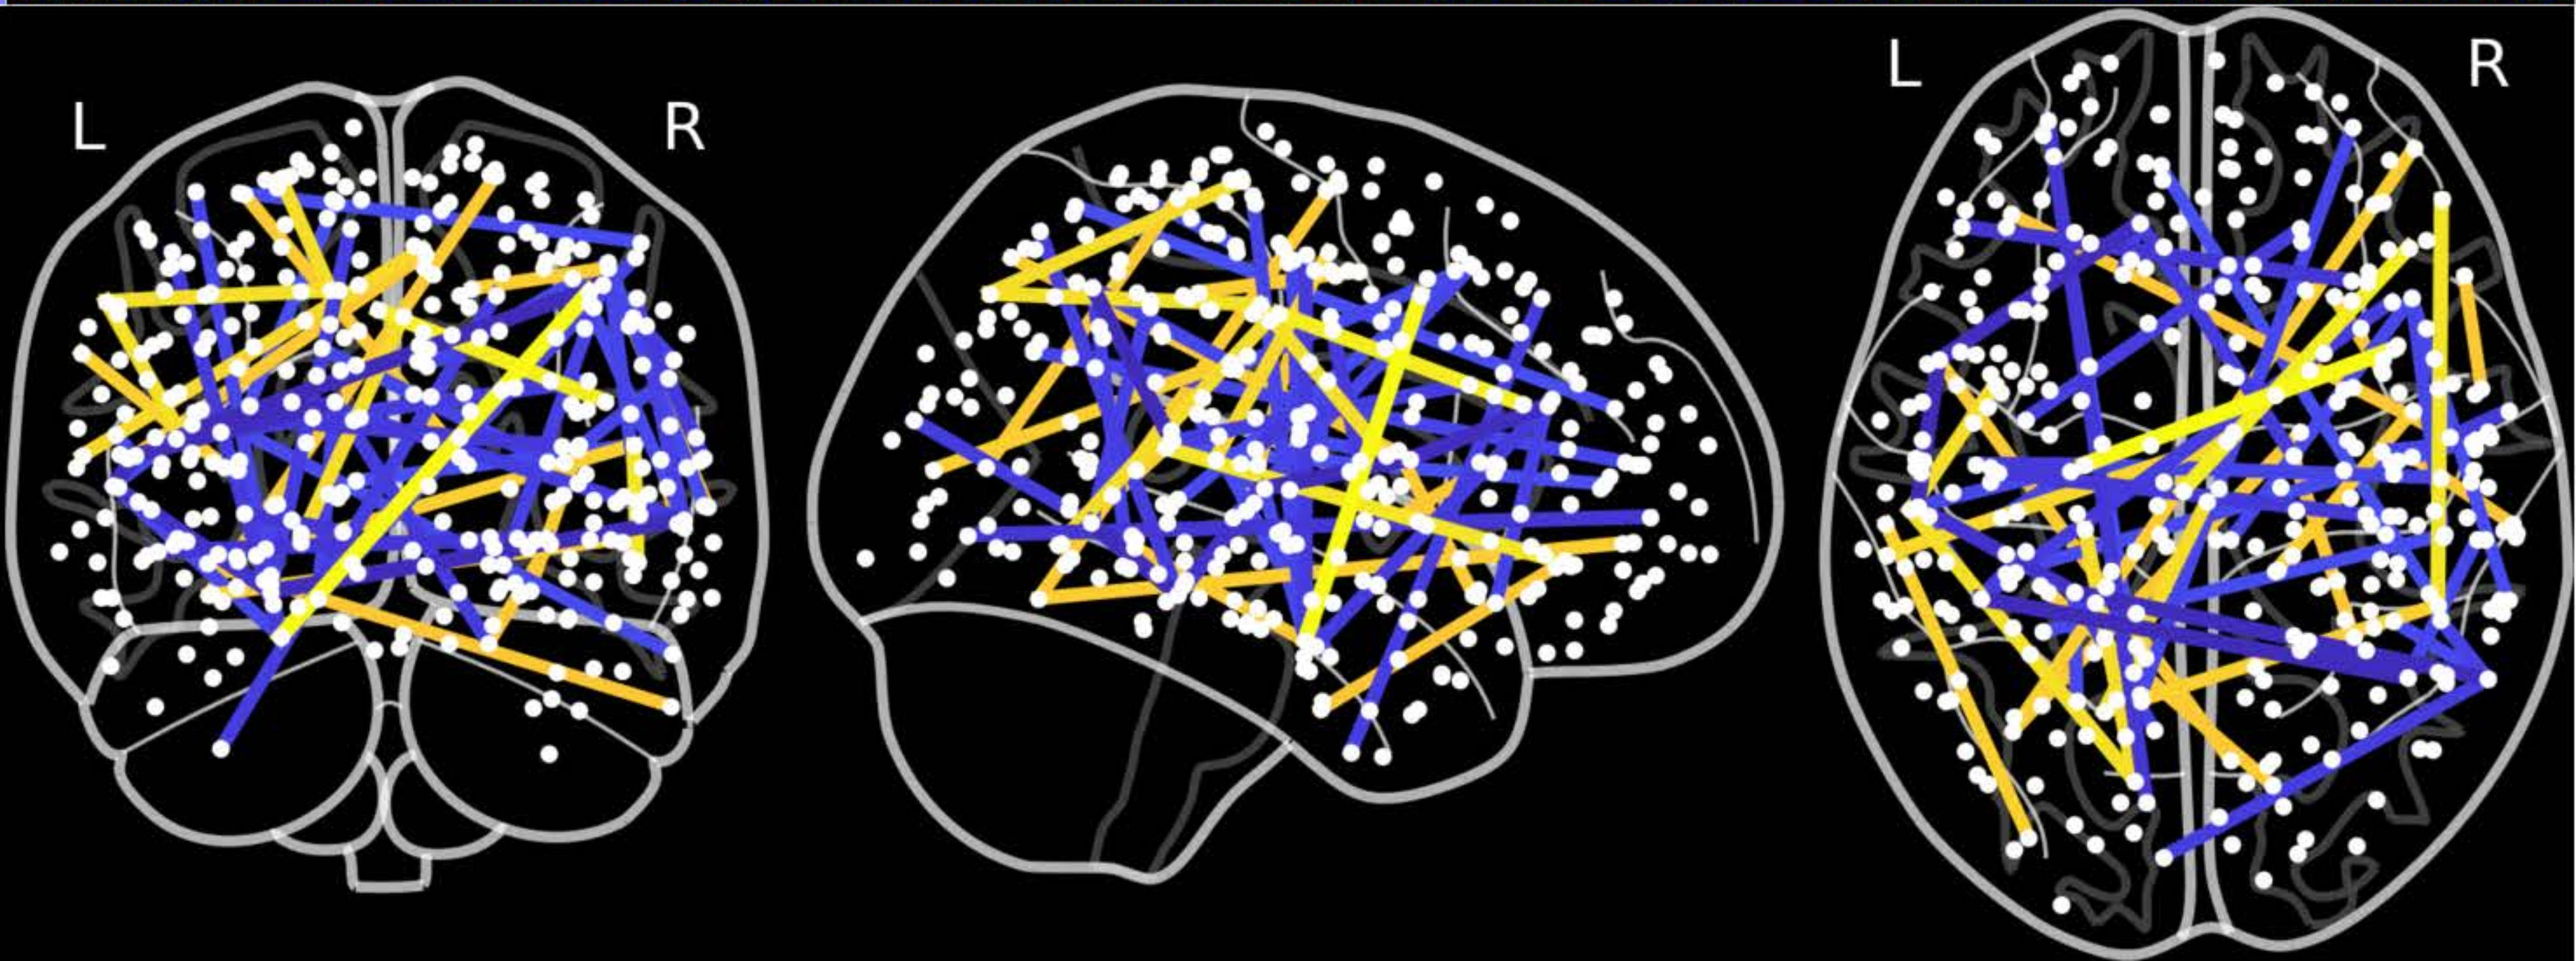



component\_34

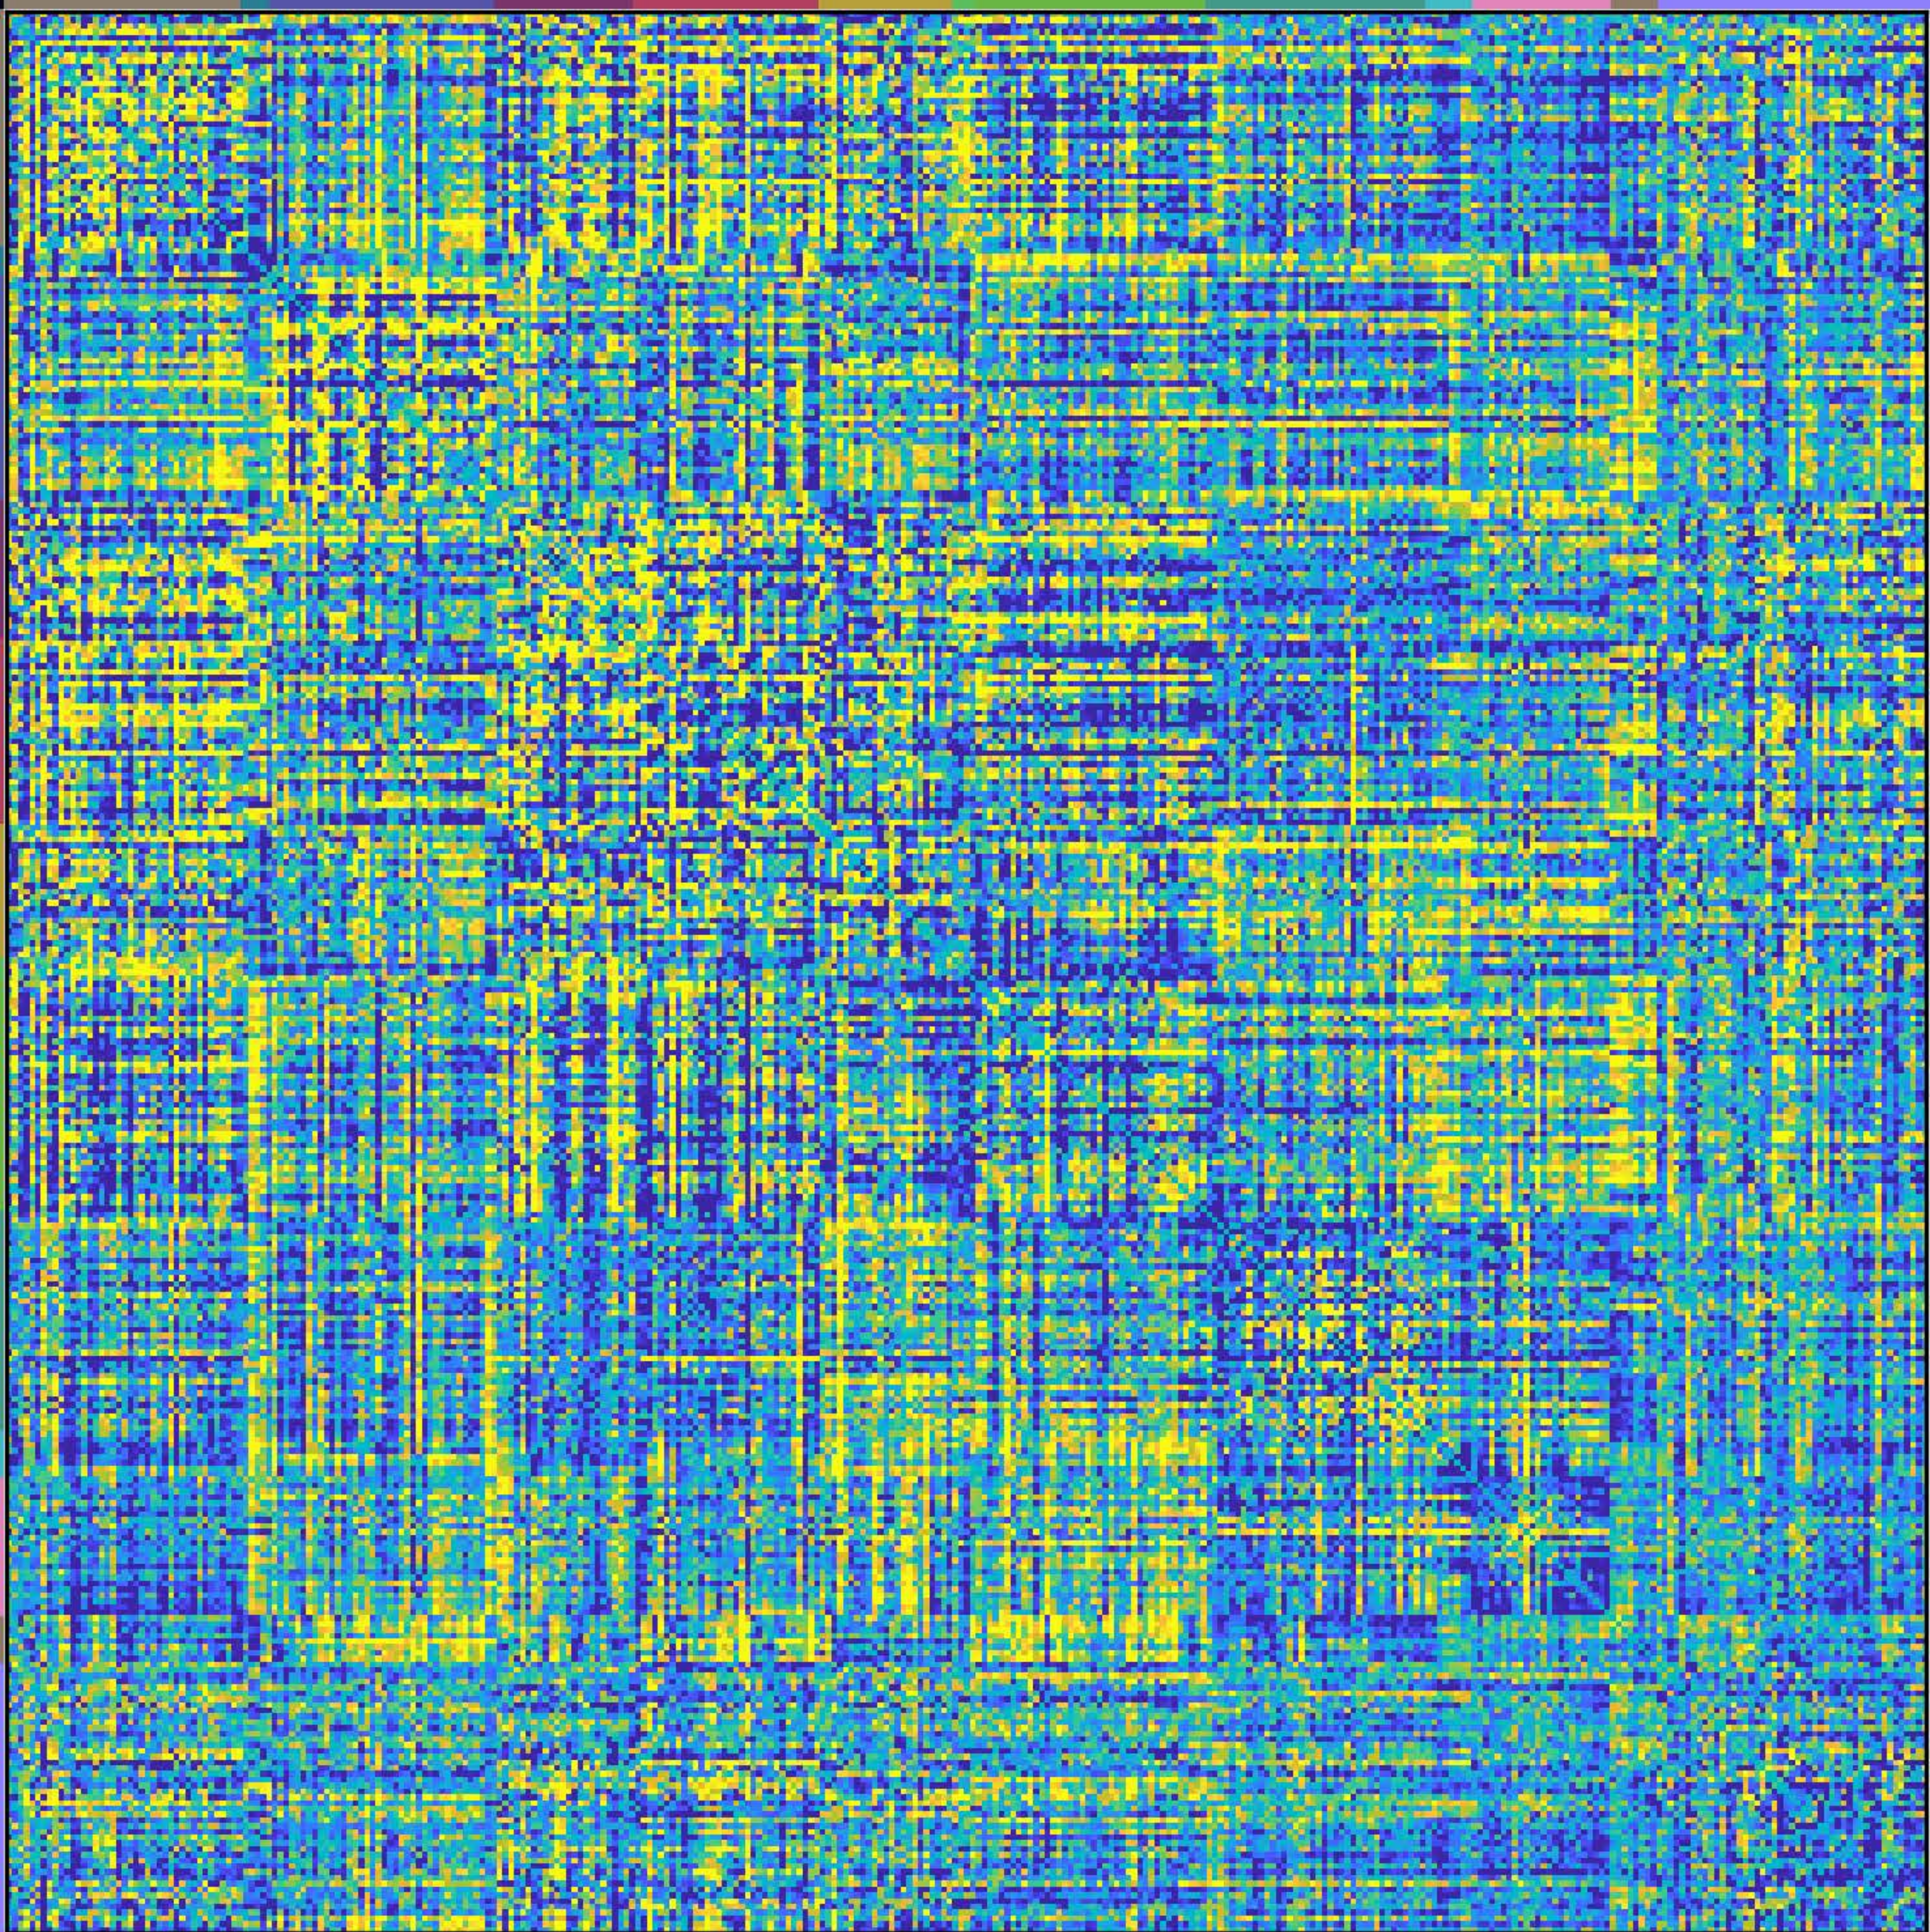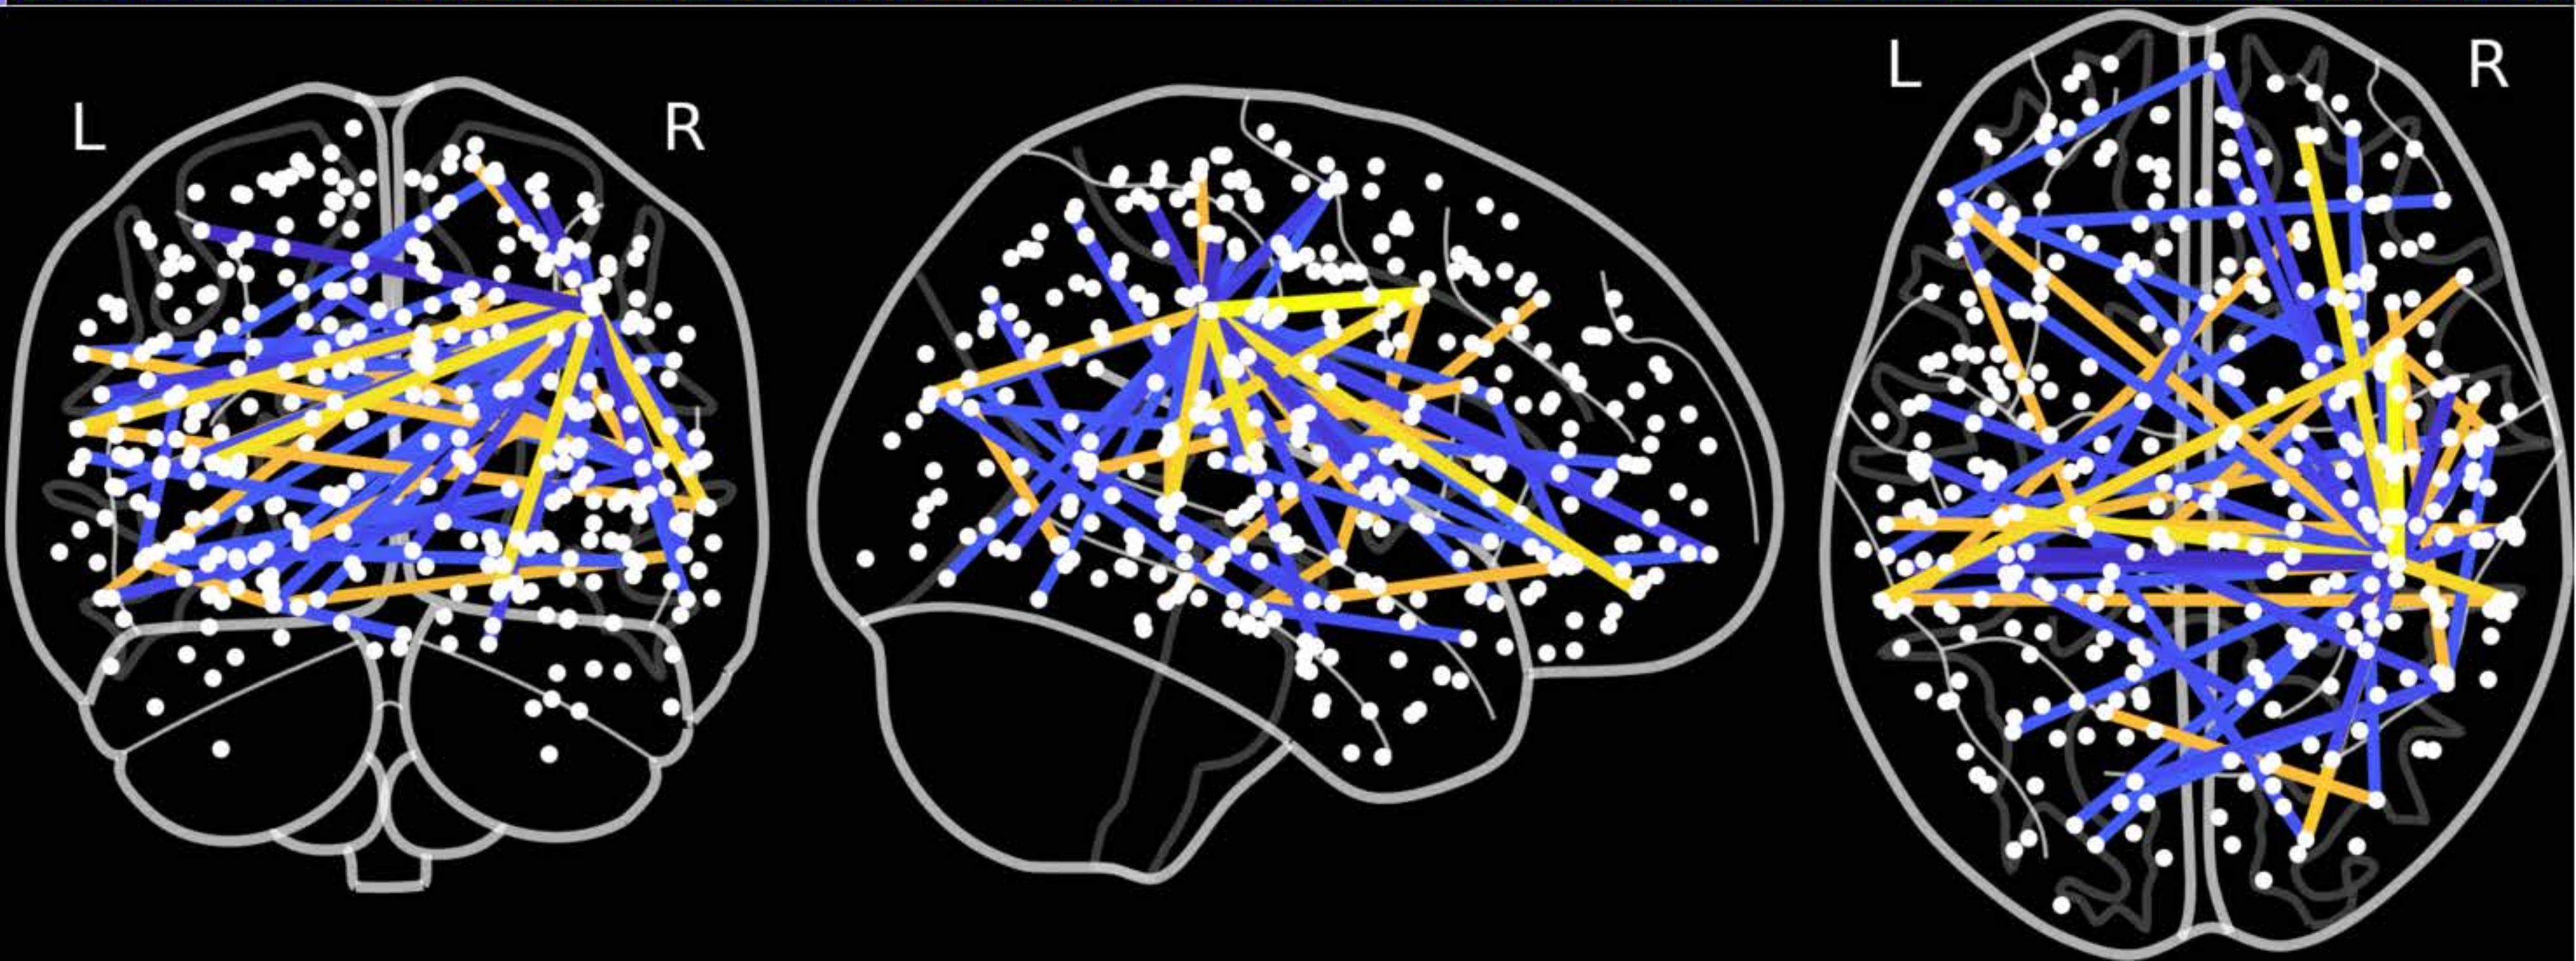



component\_35

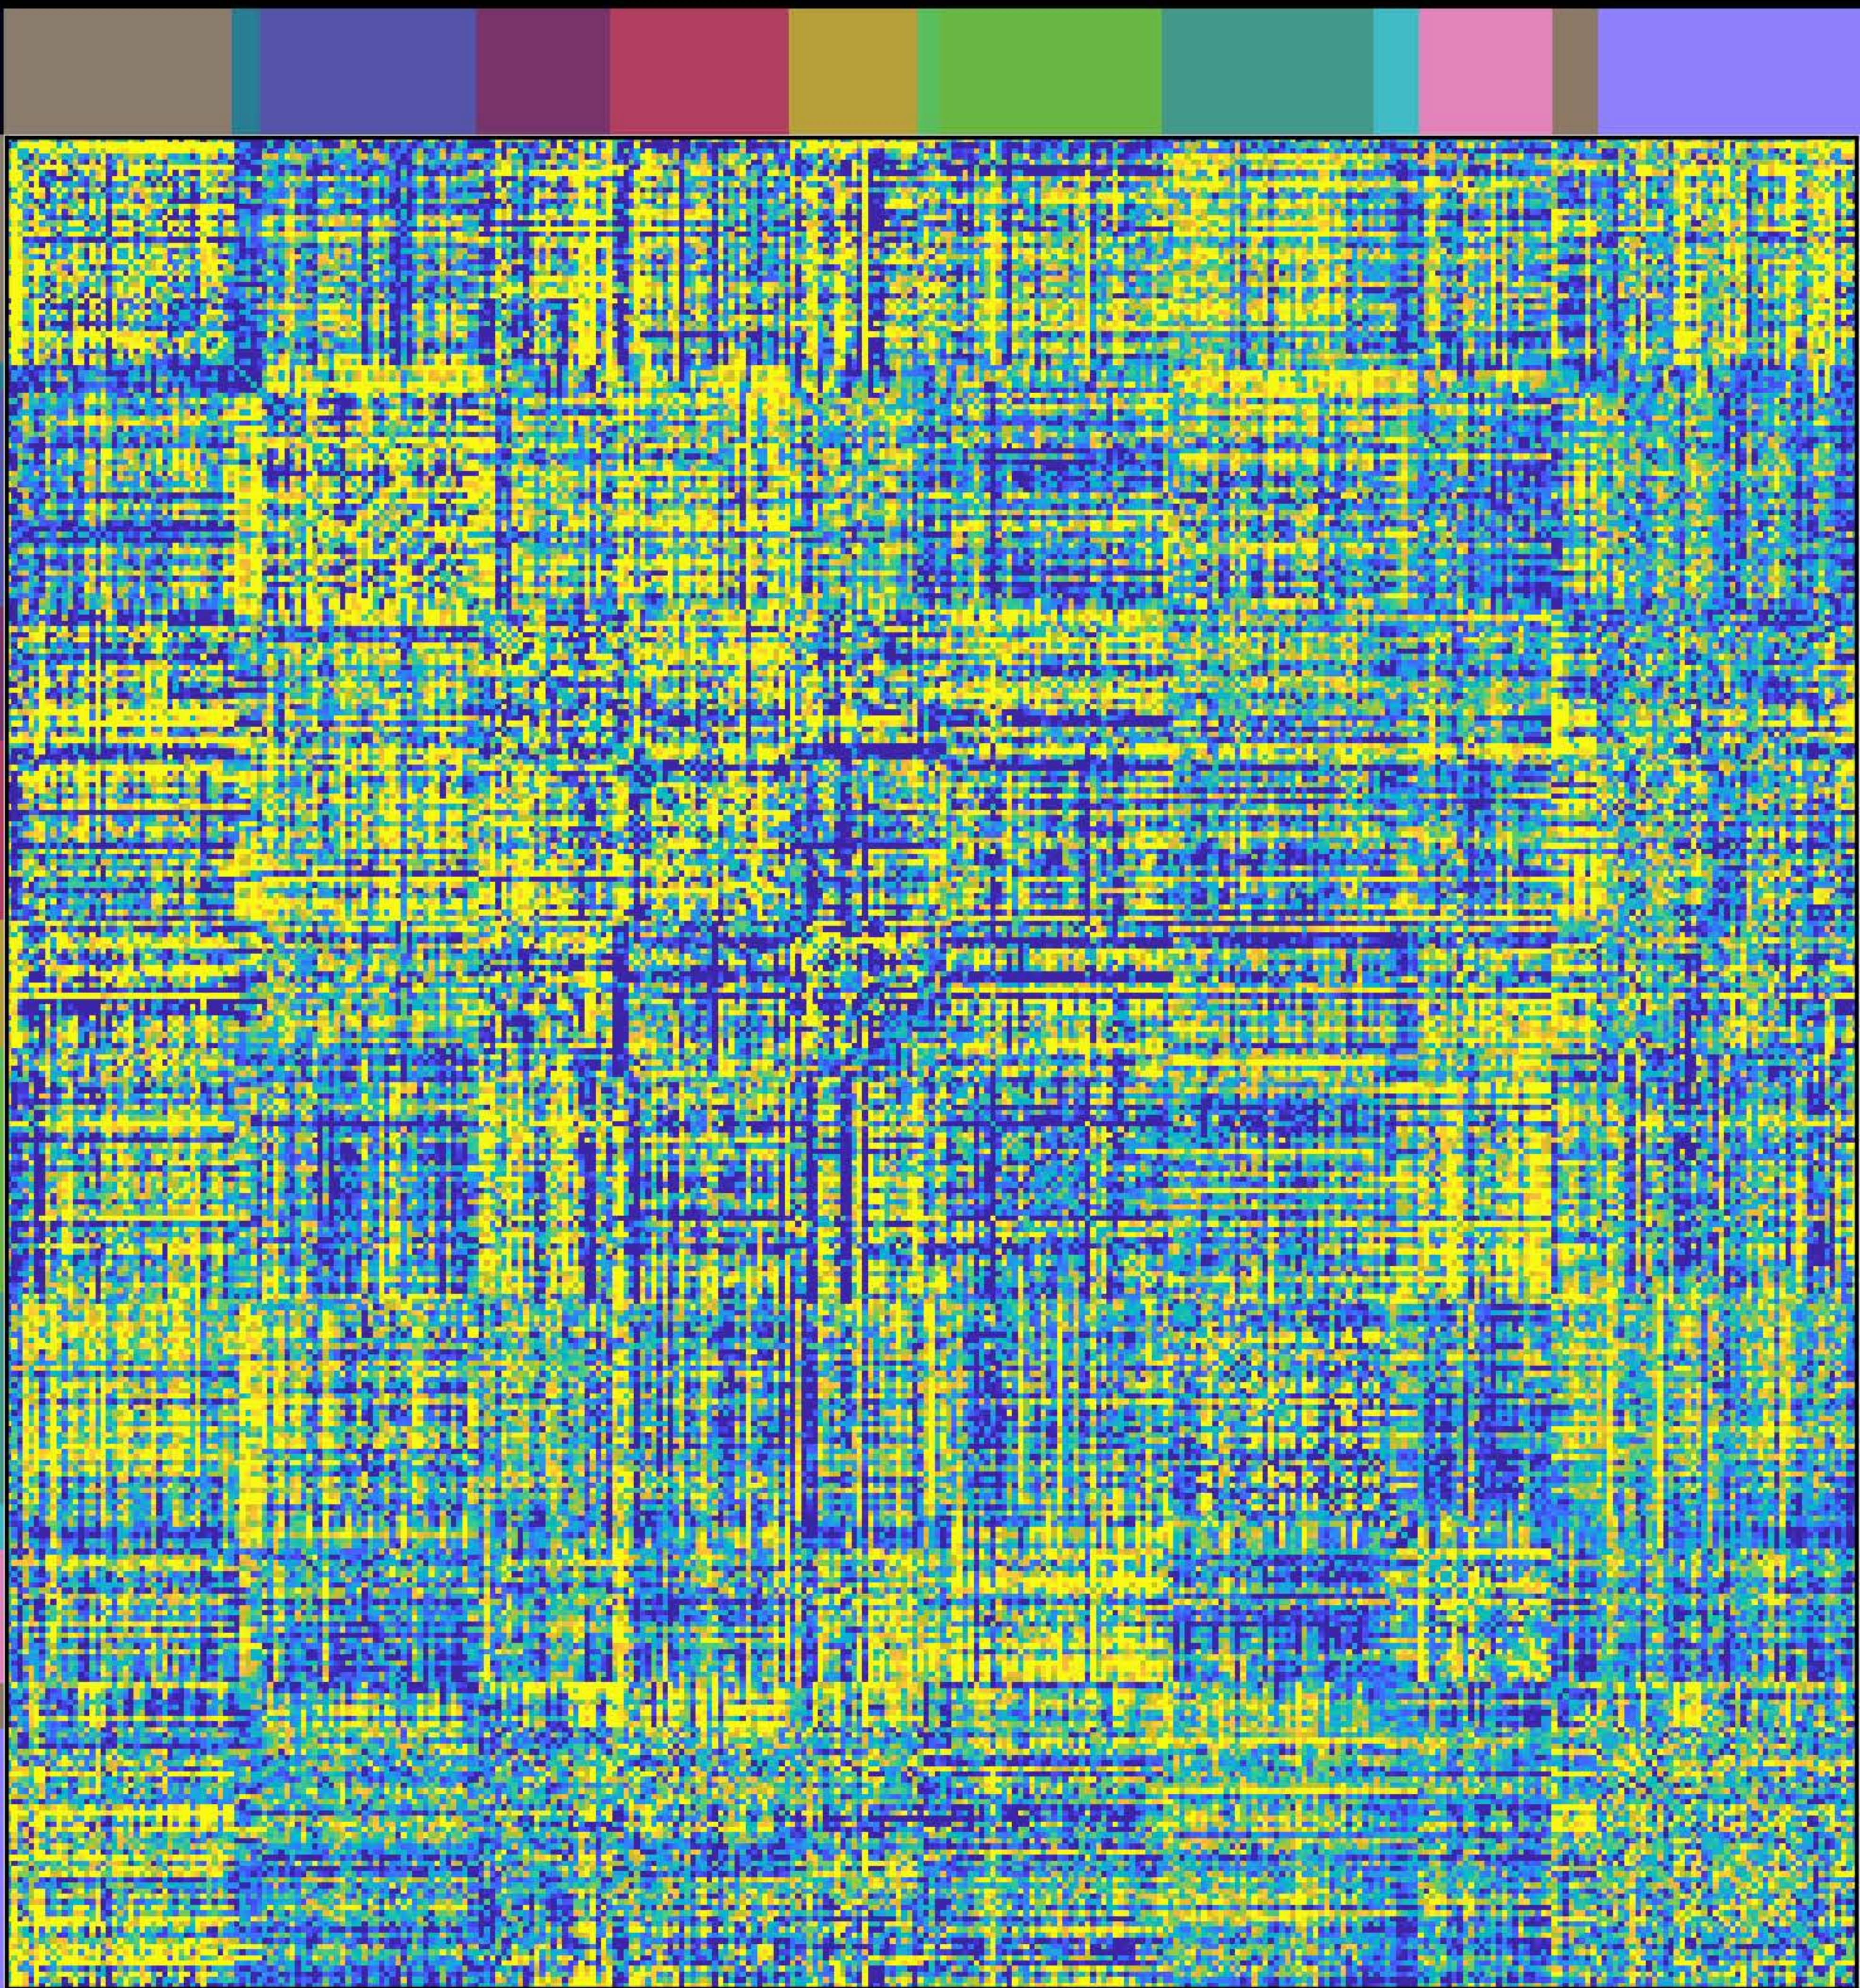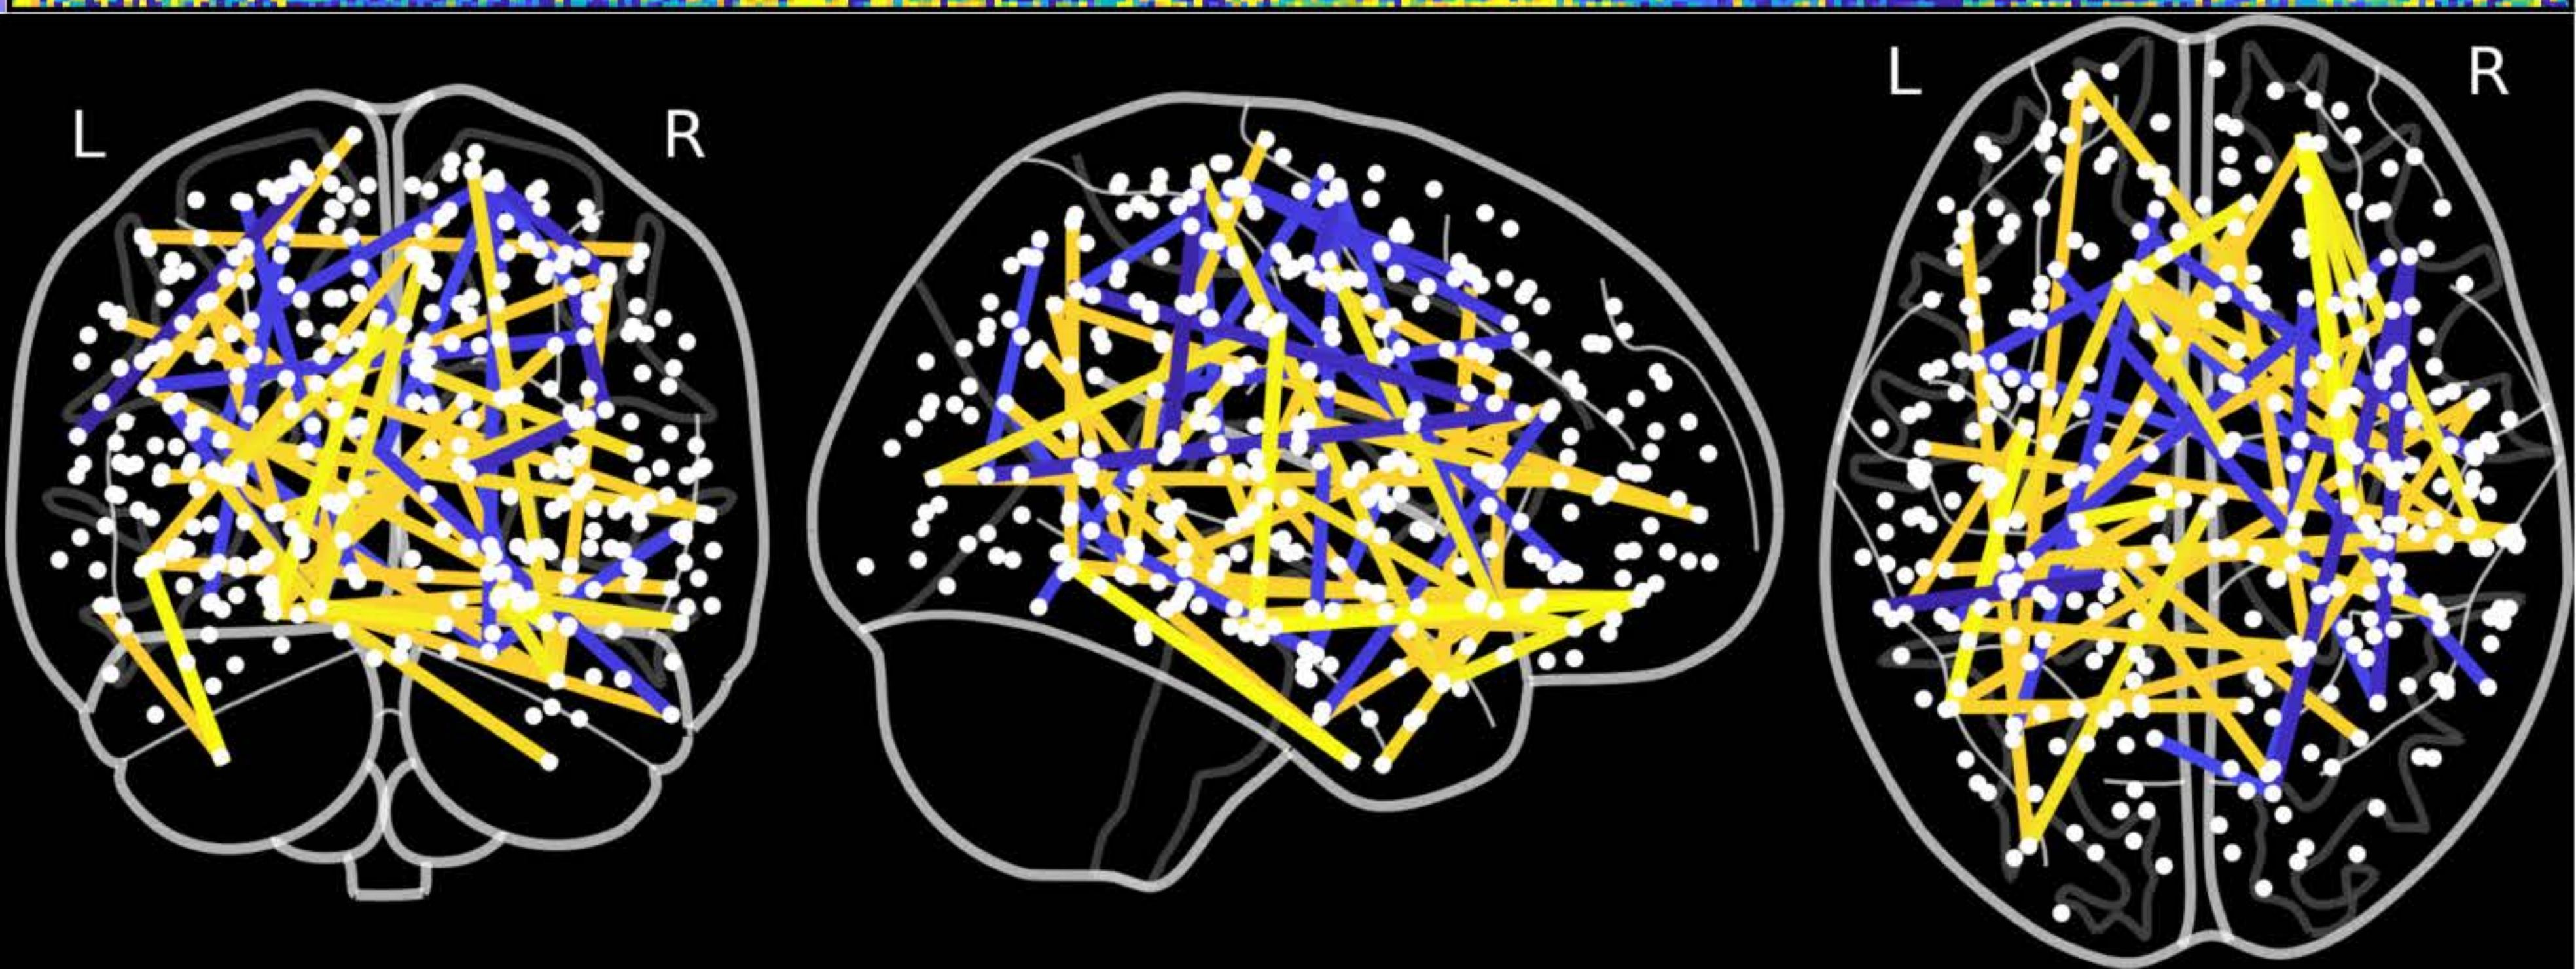



component\_36

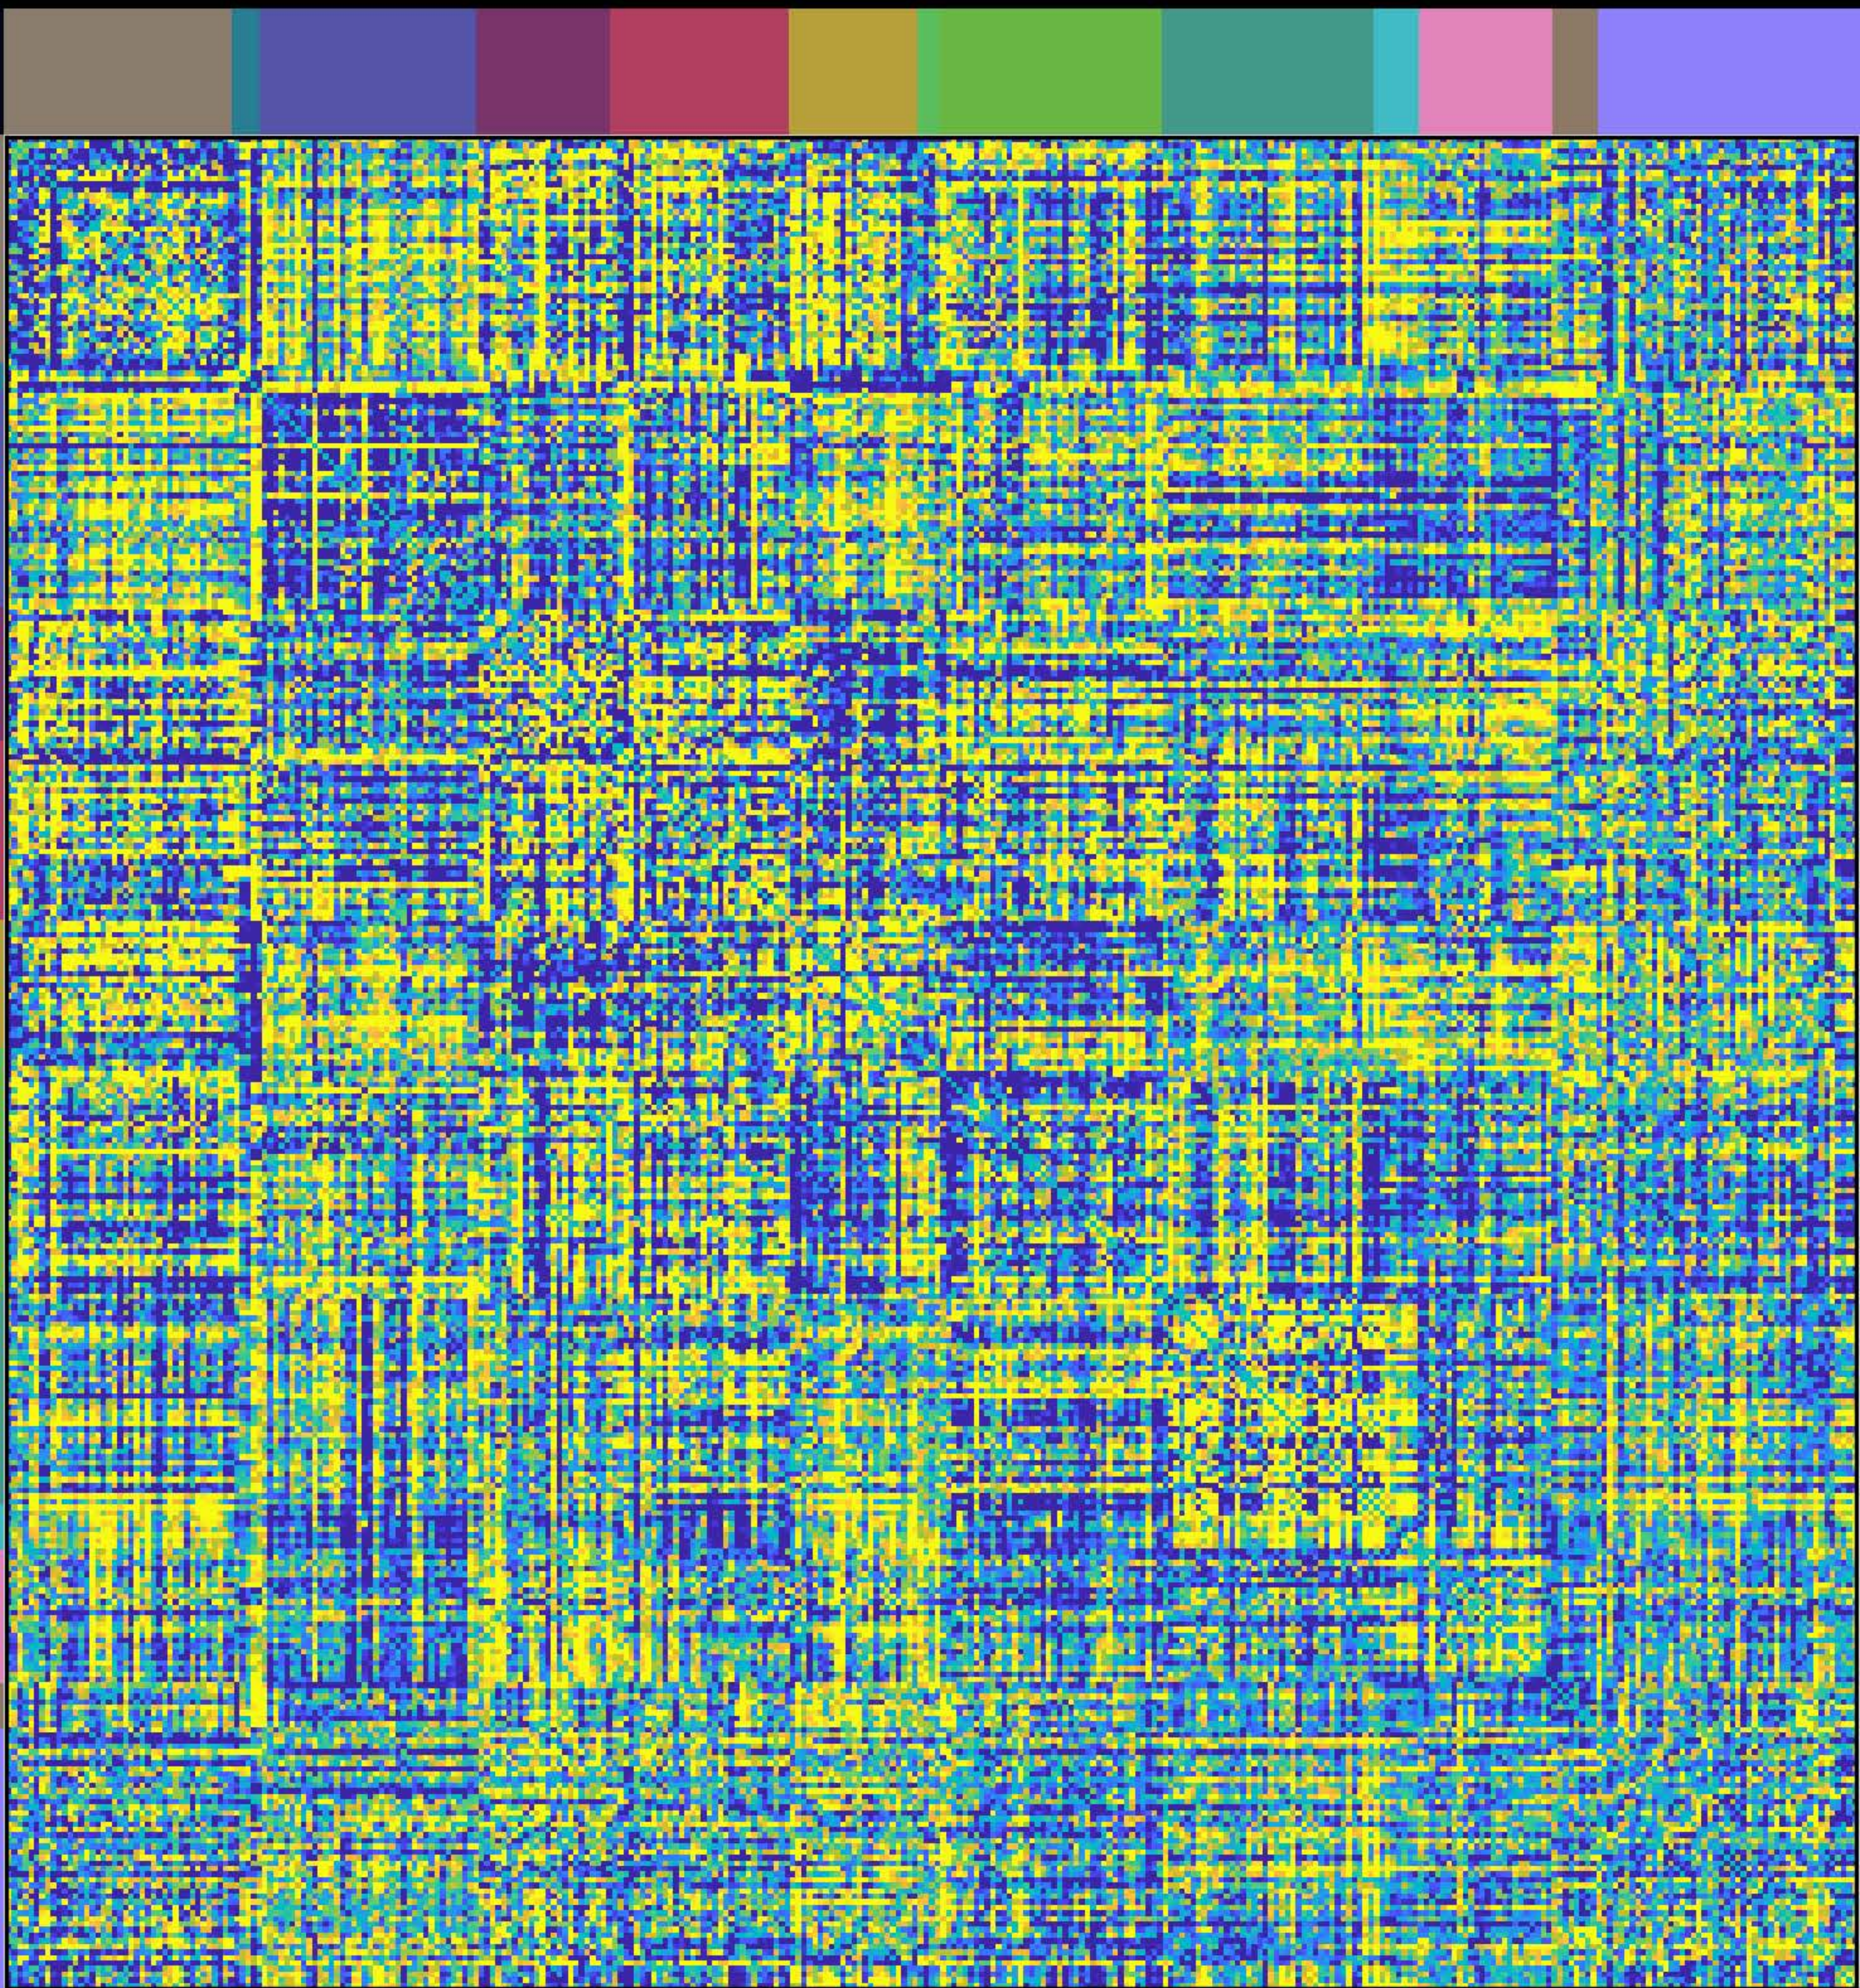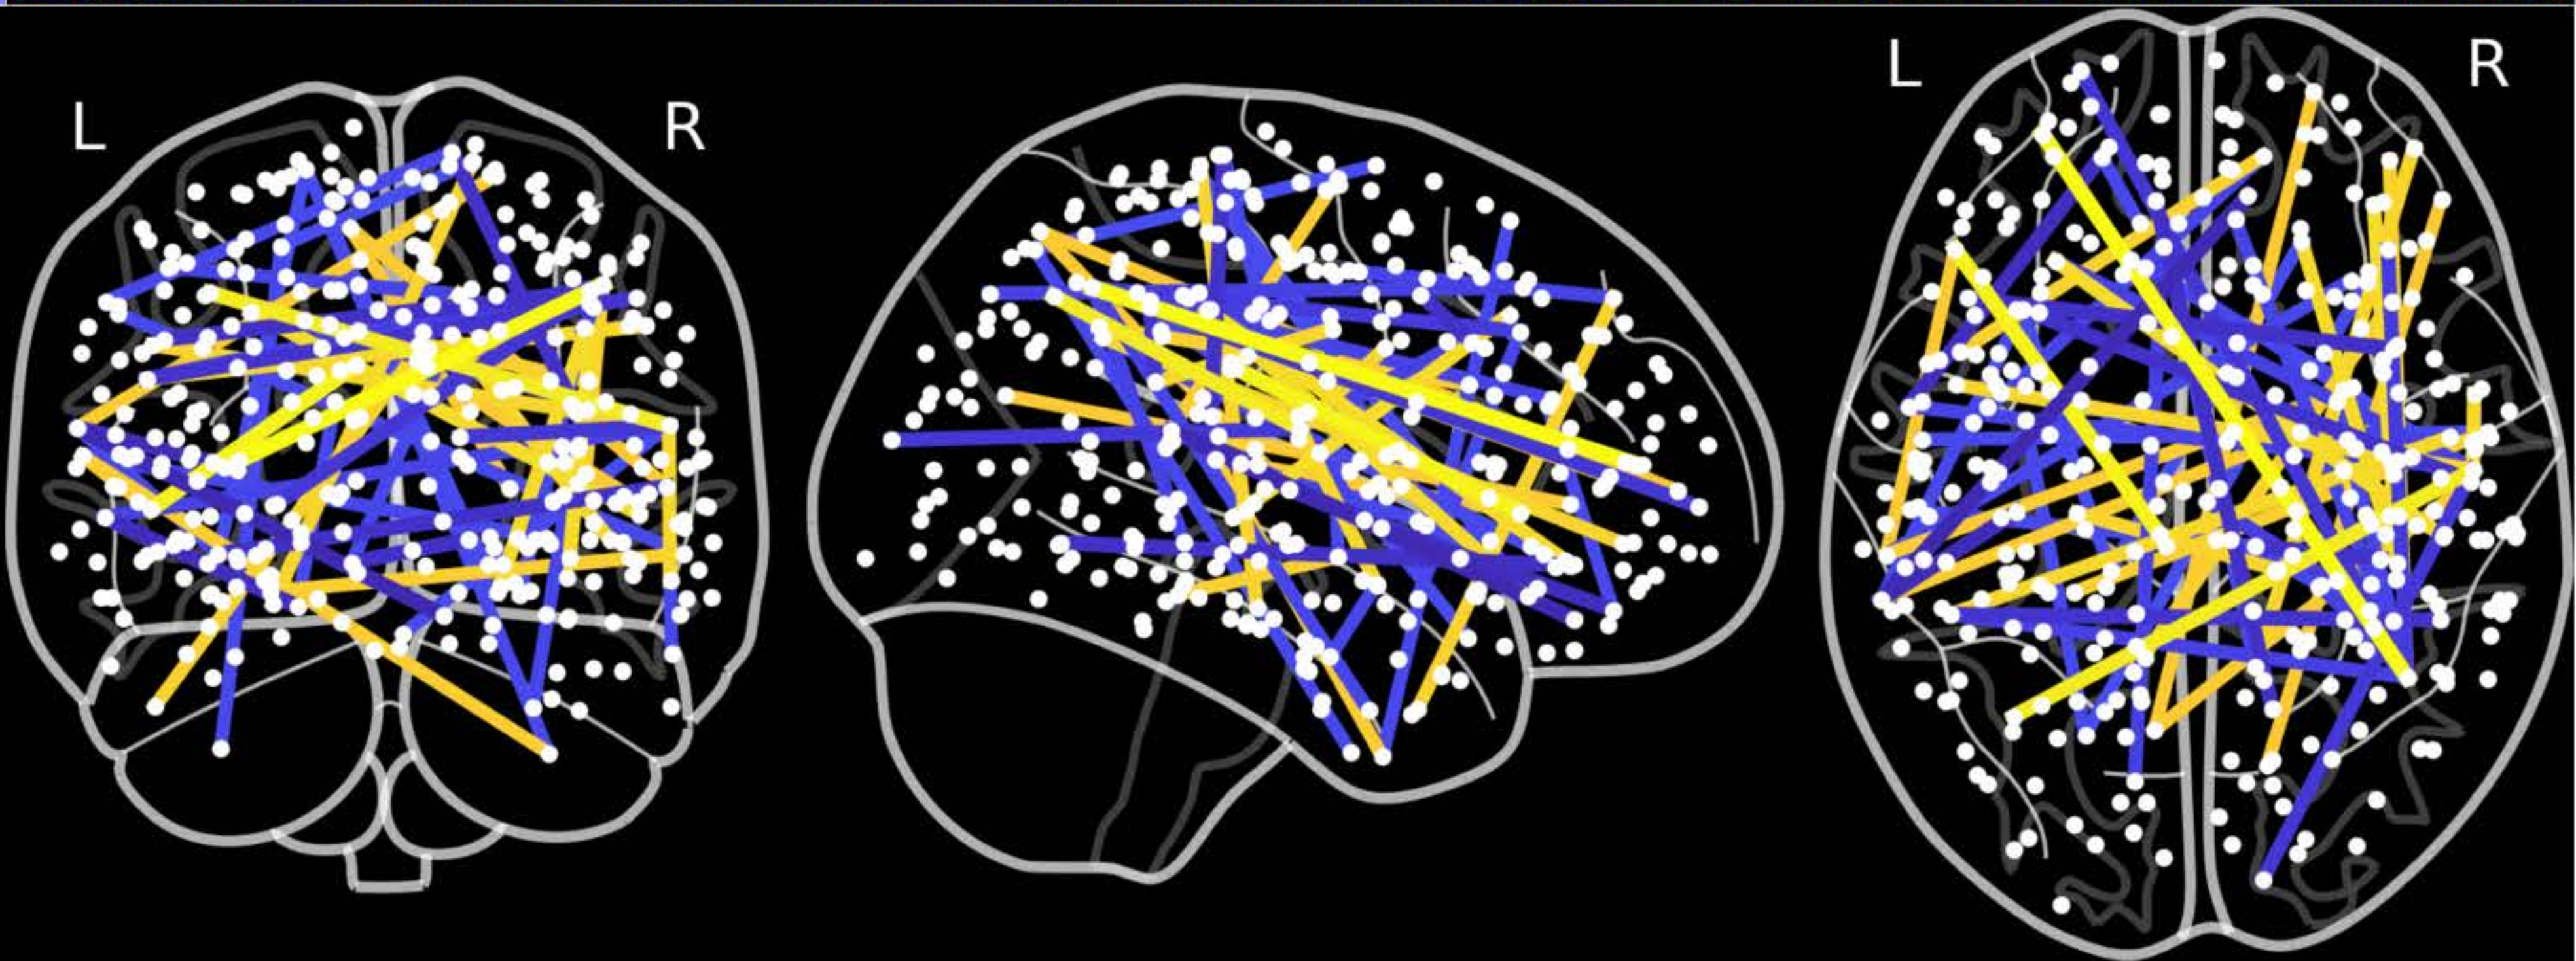



component\_37

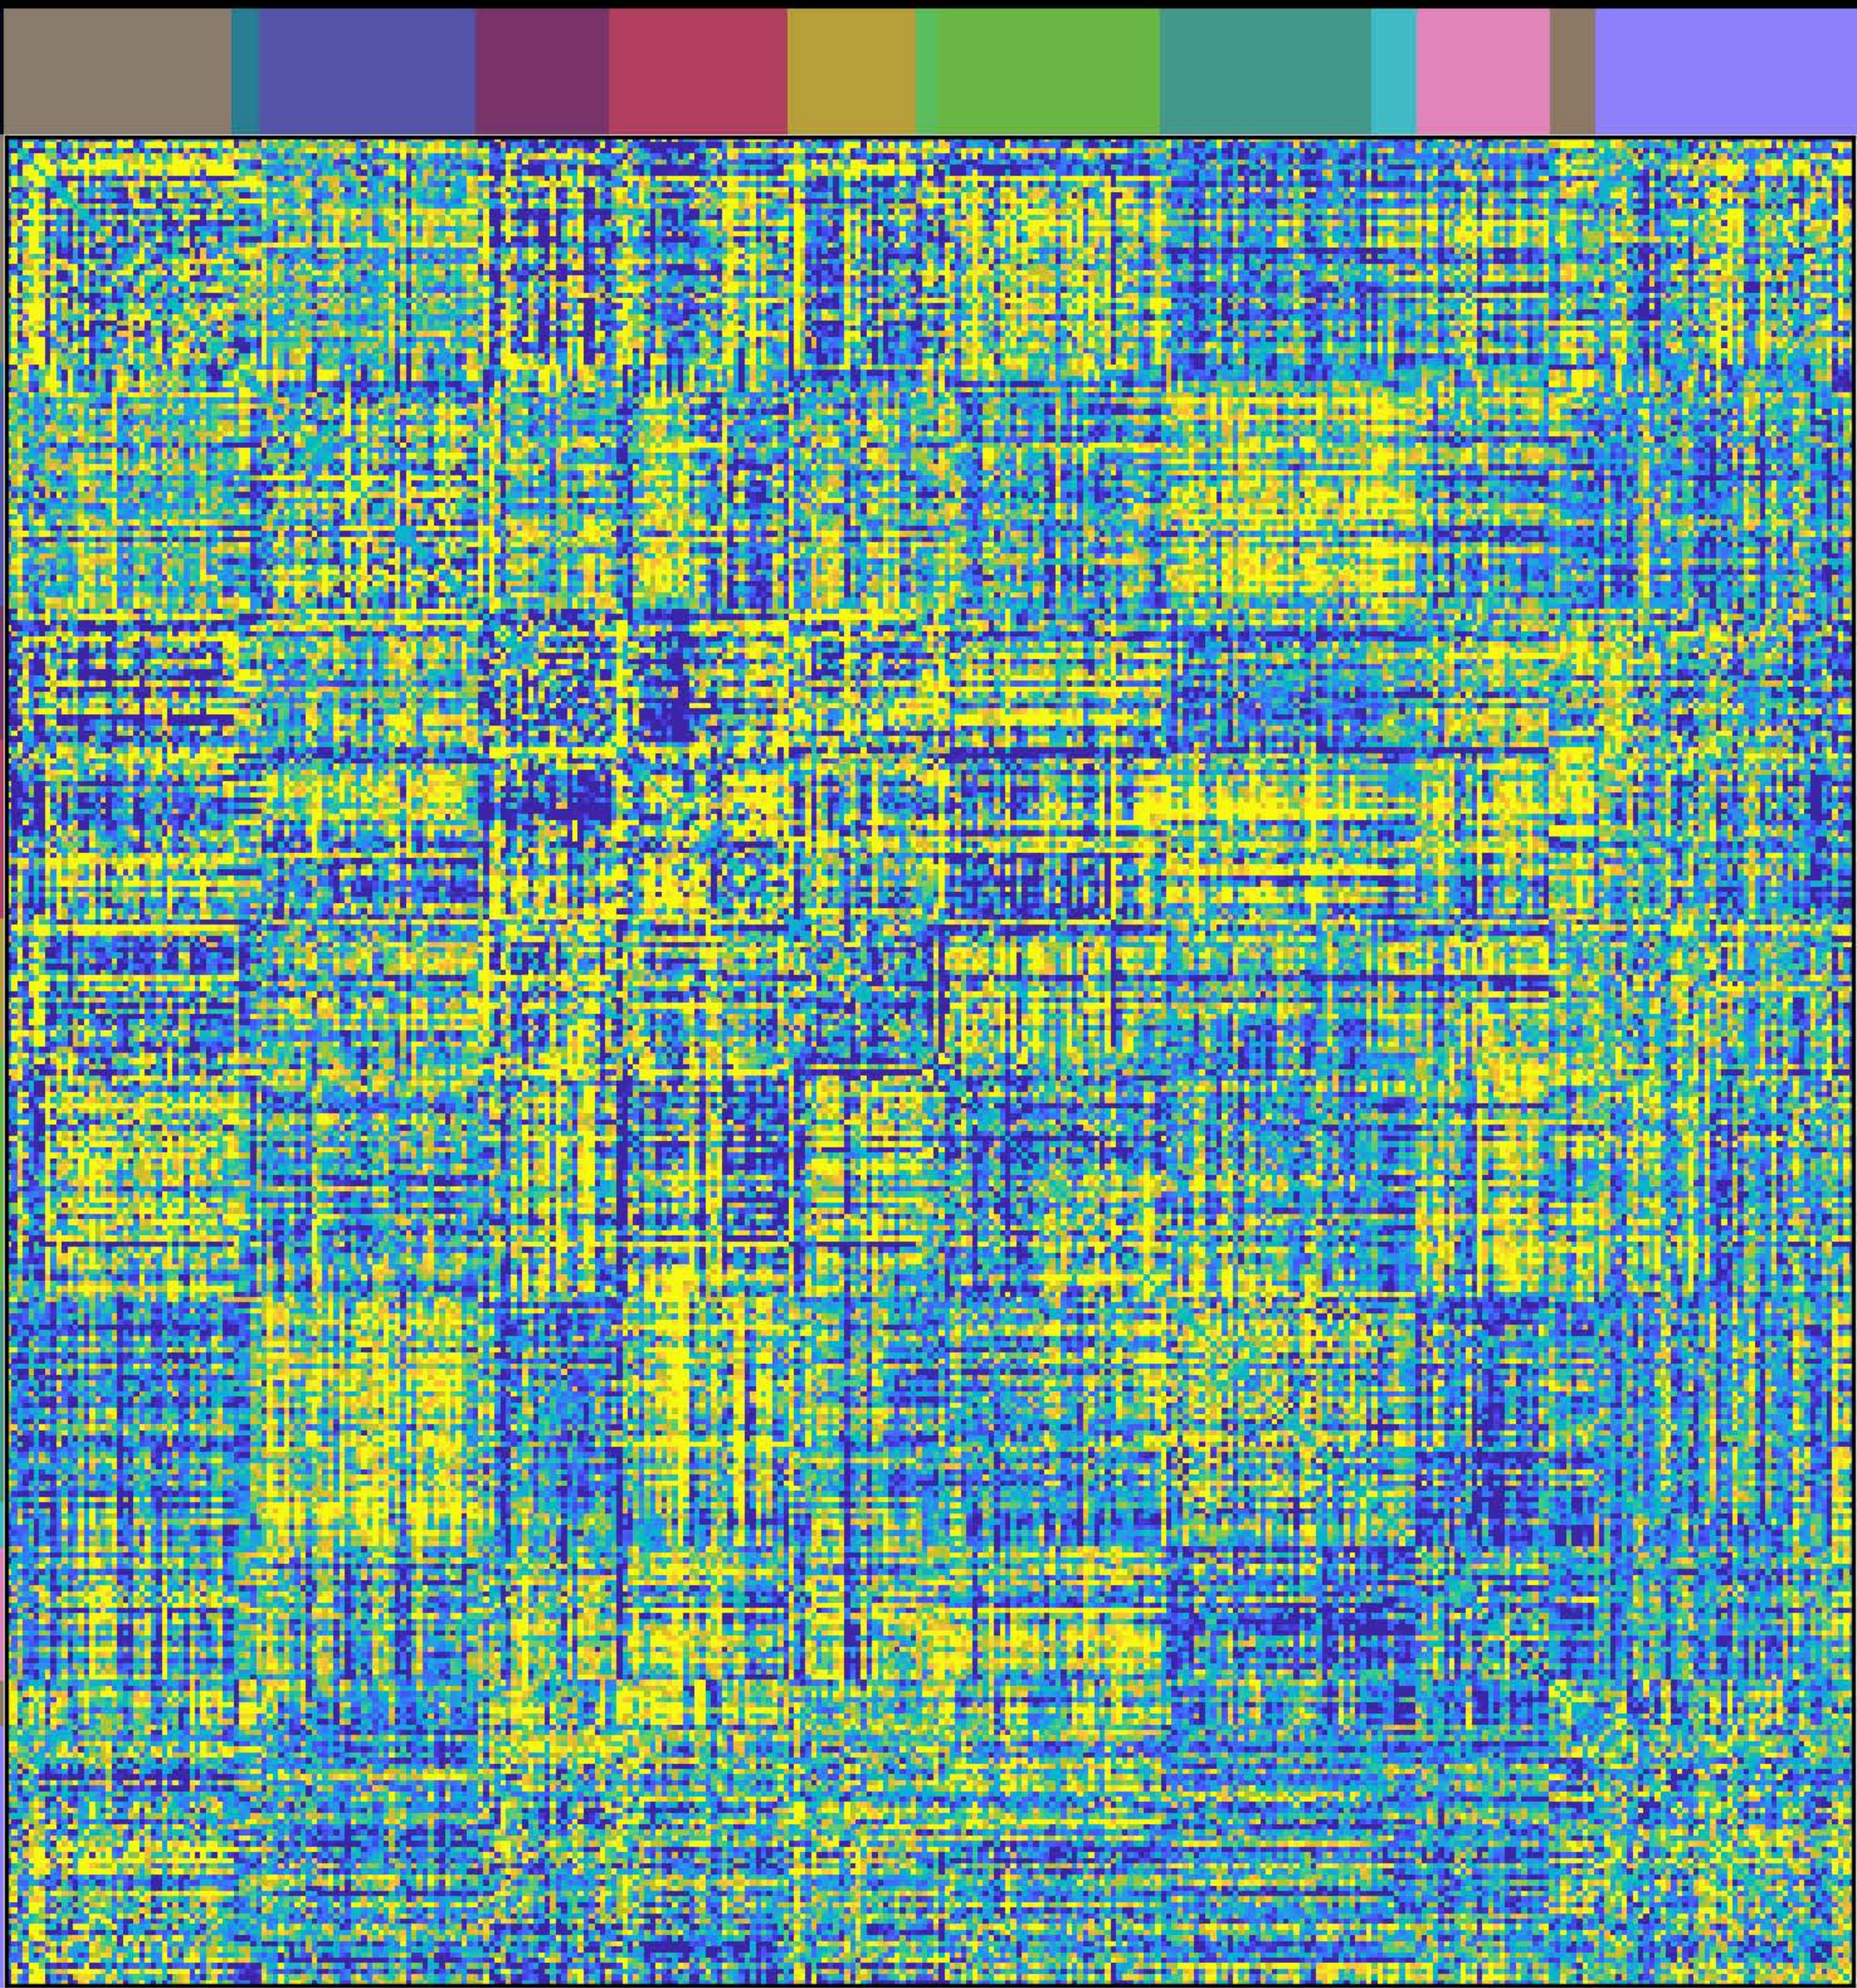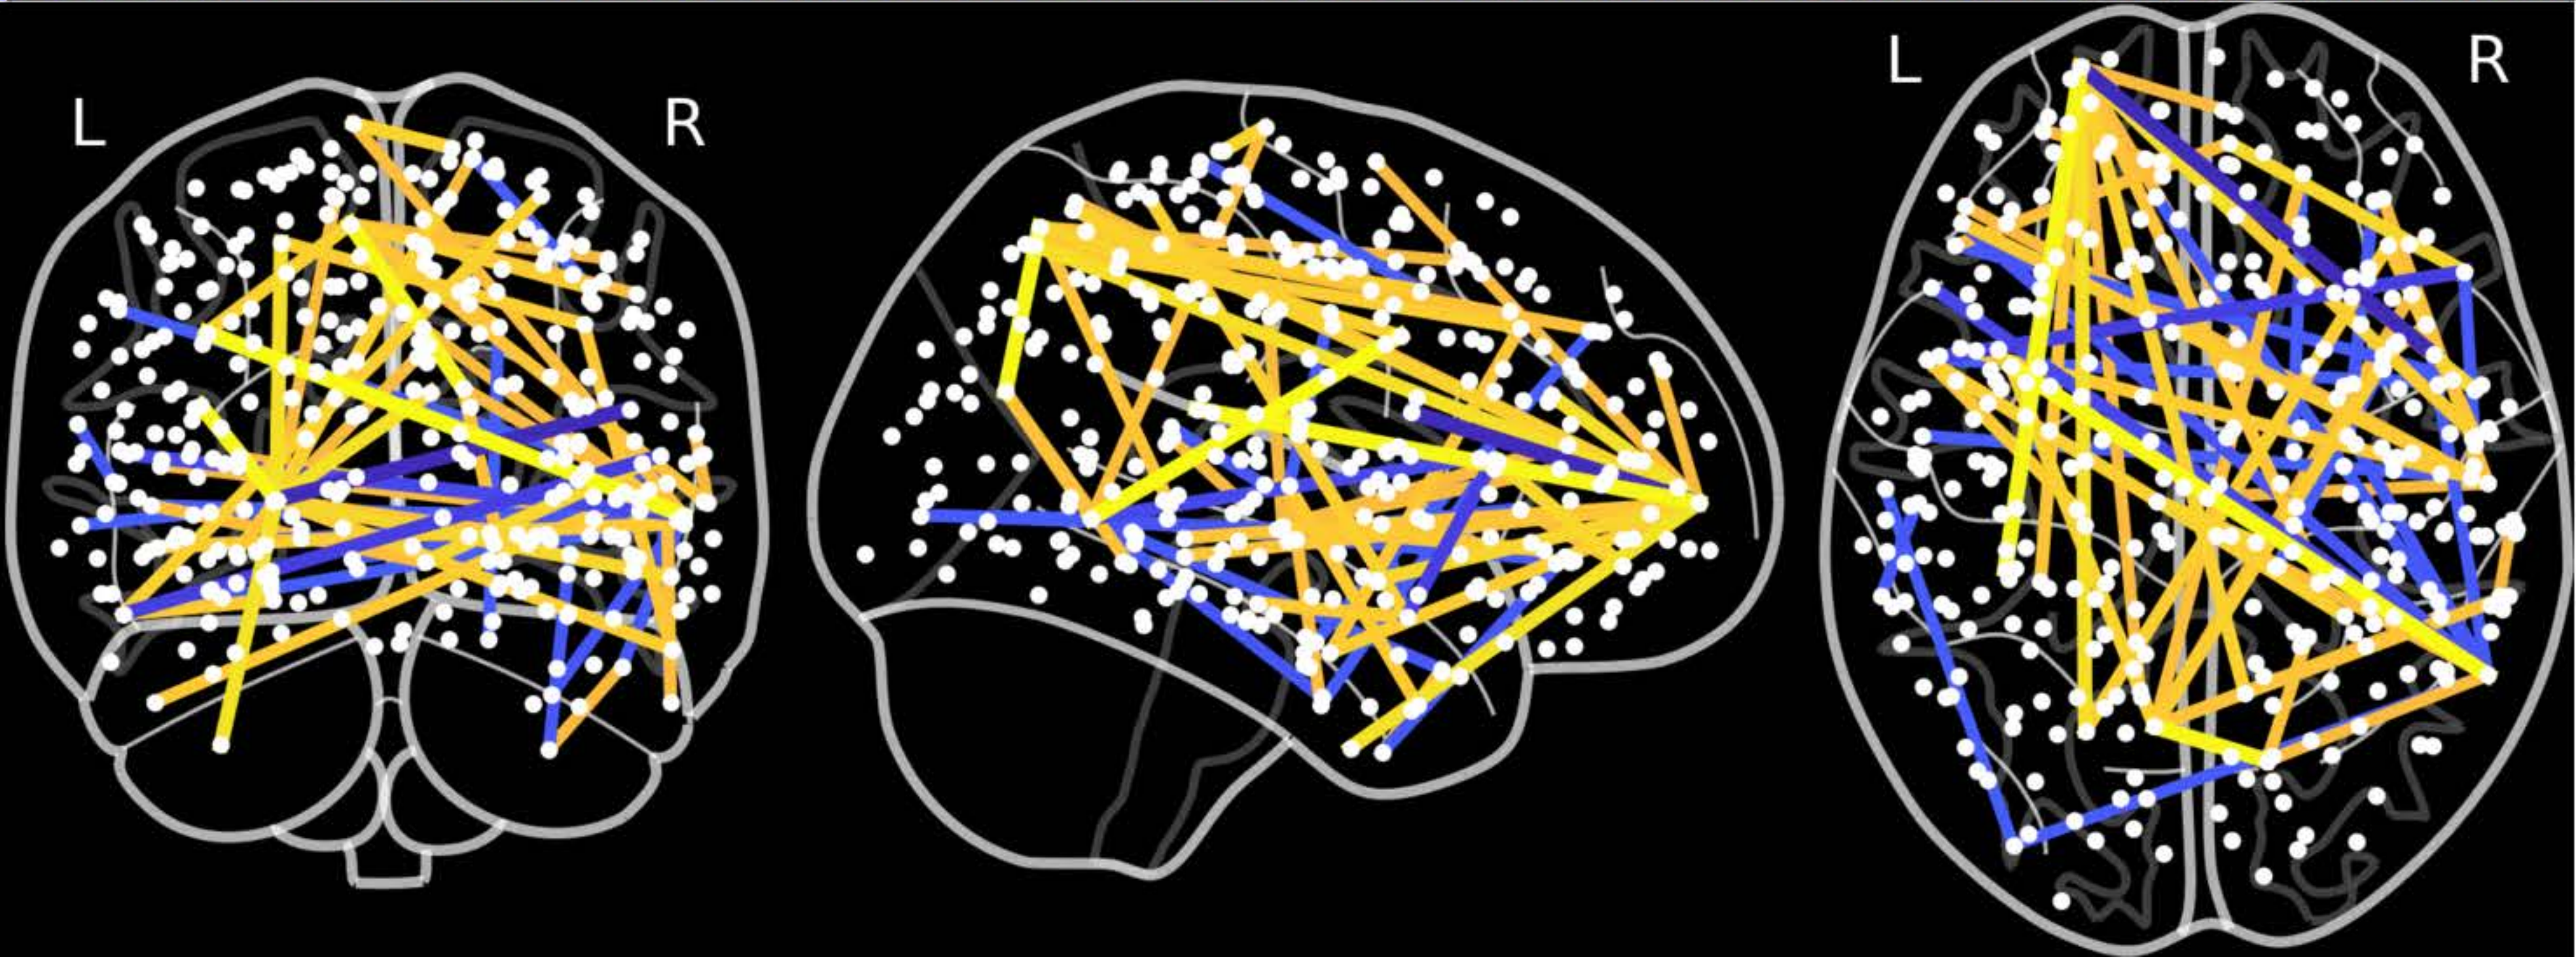



component\_38

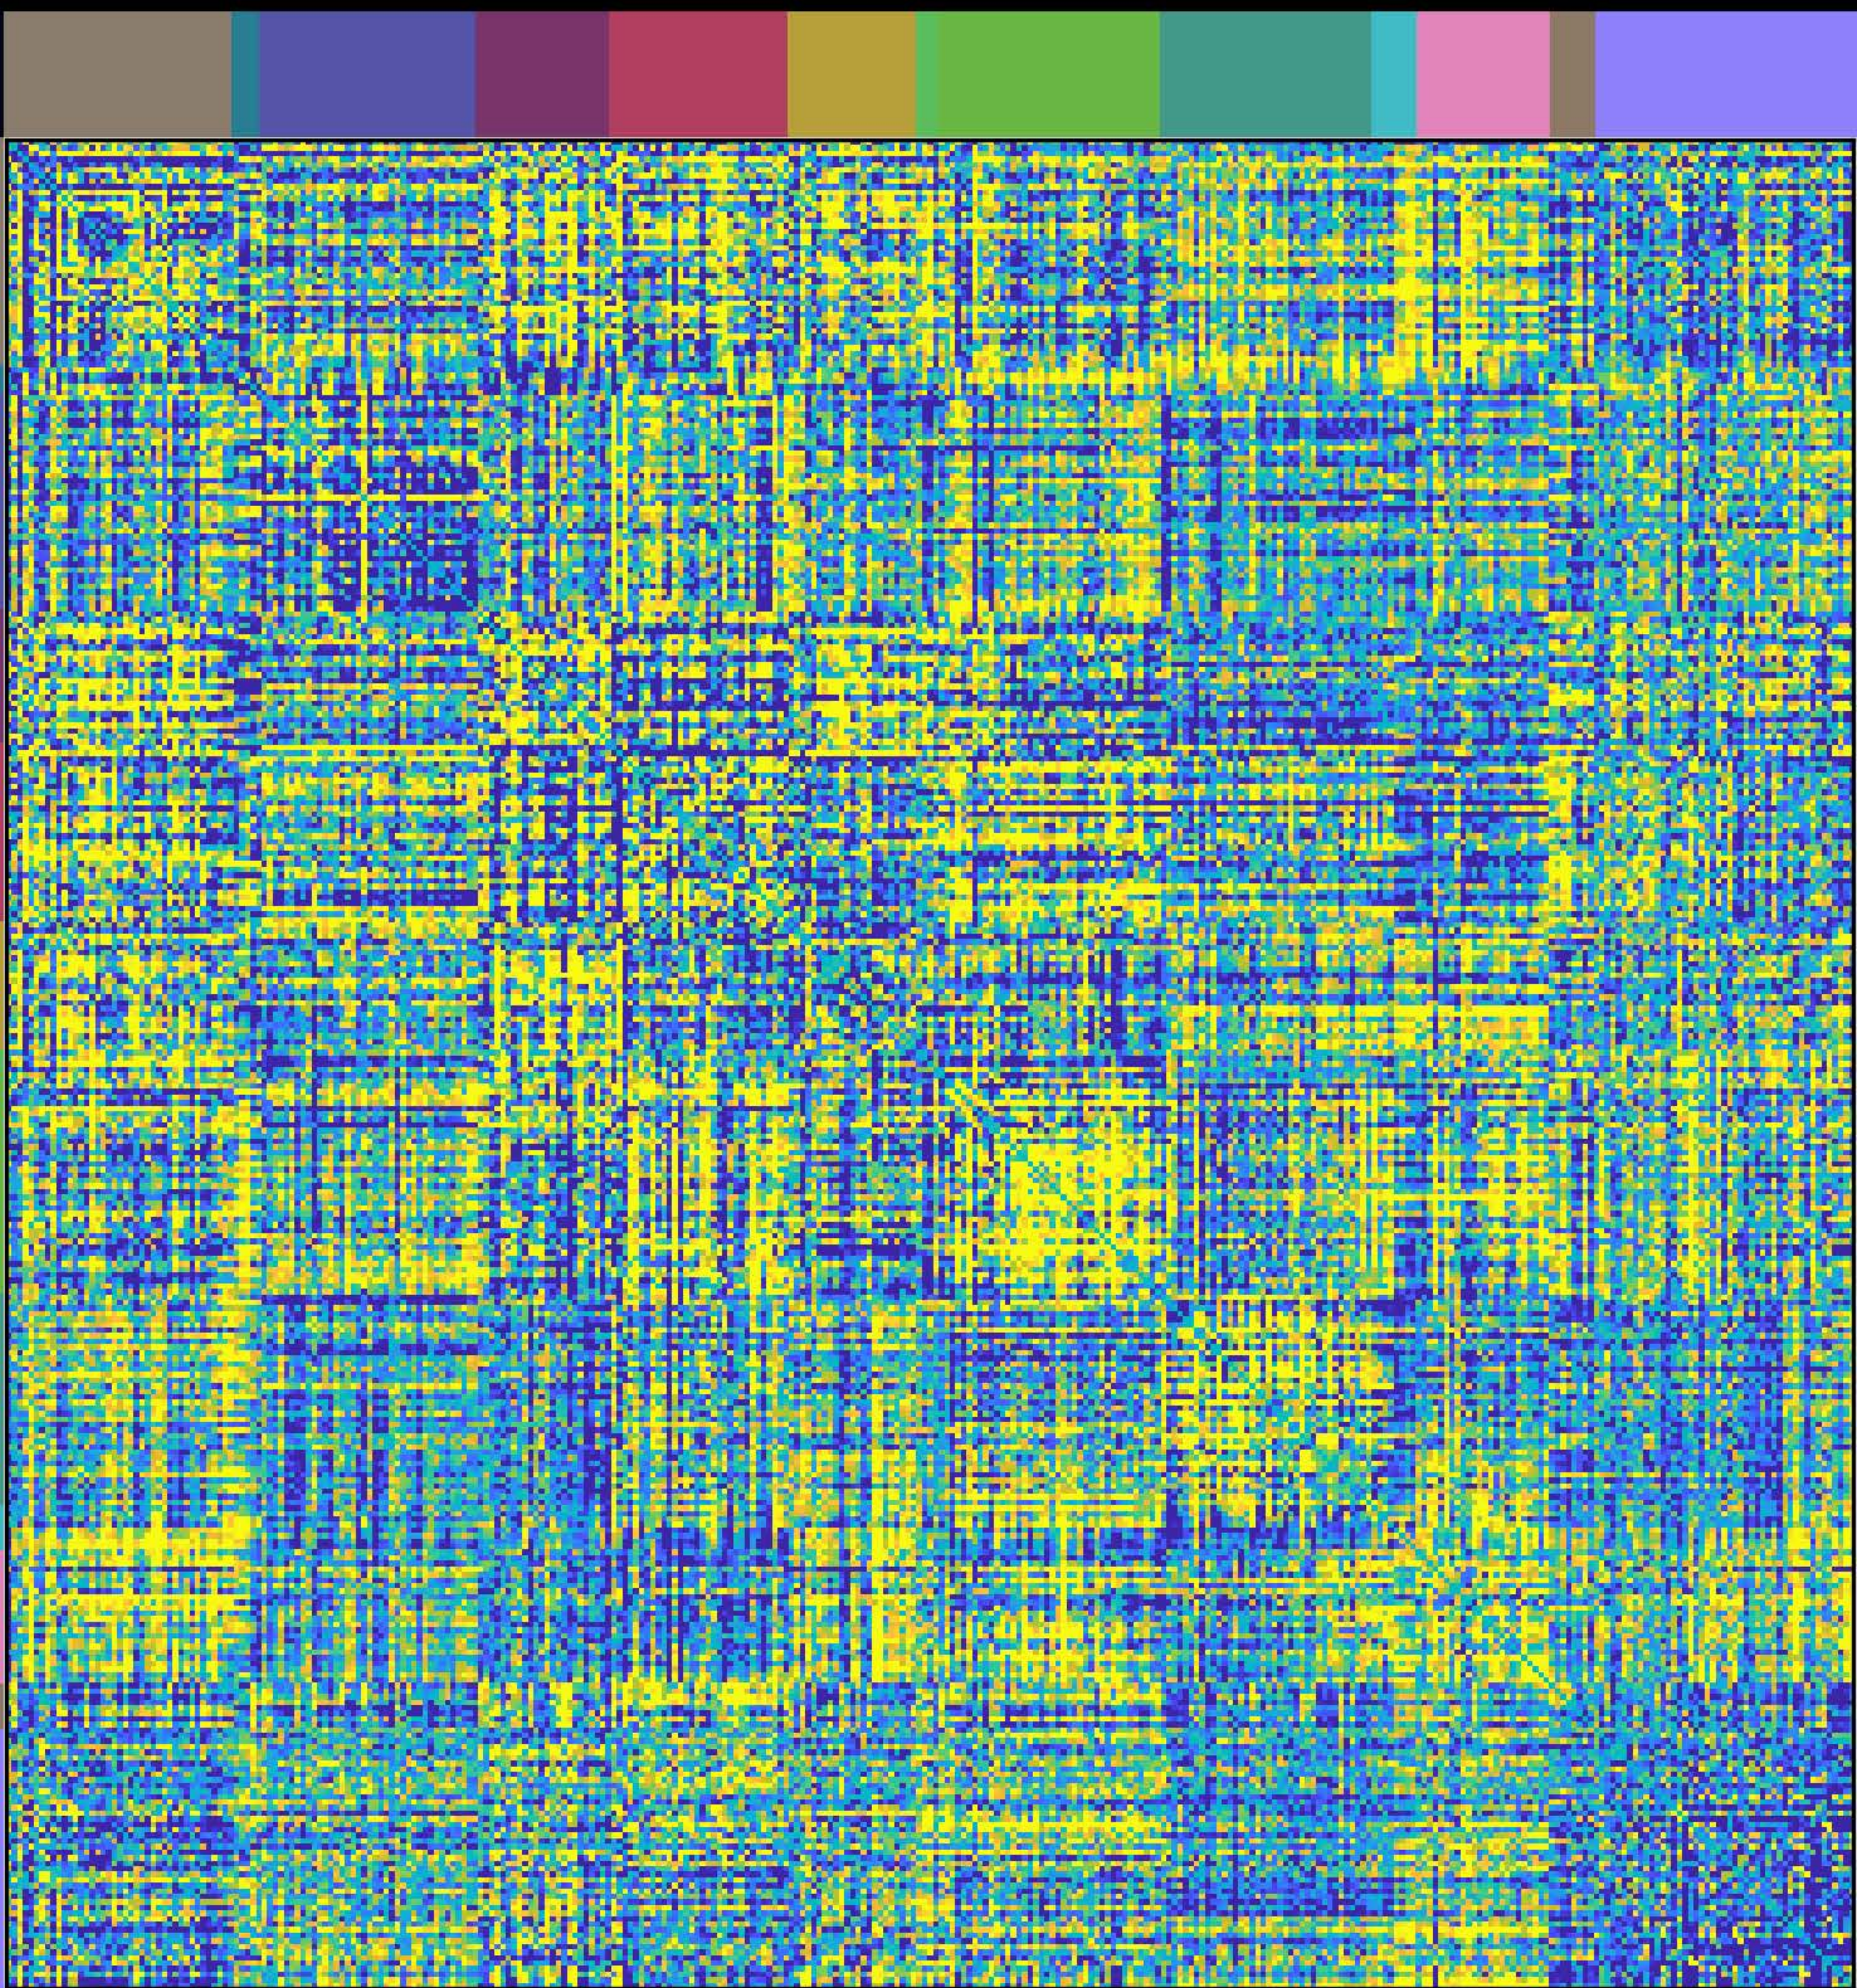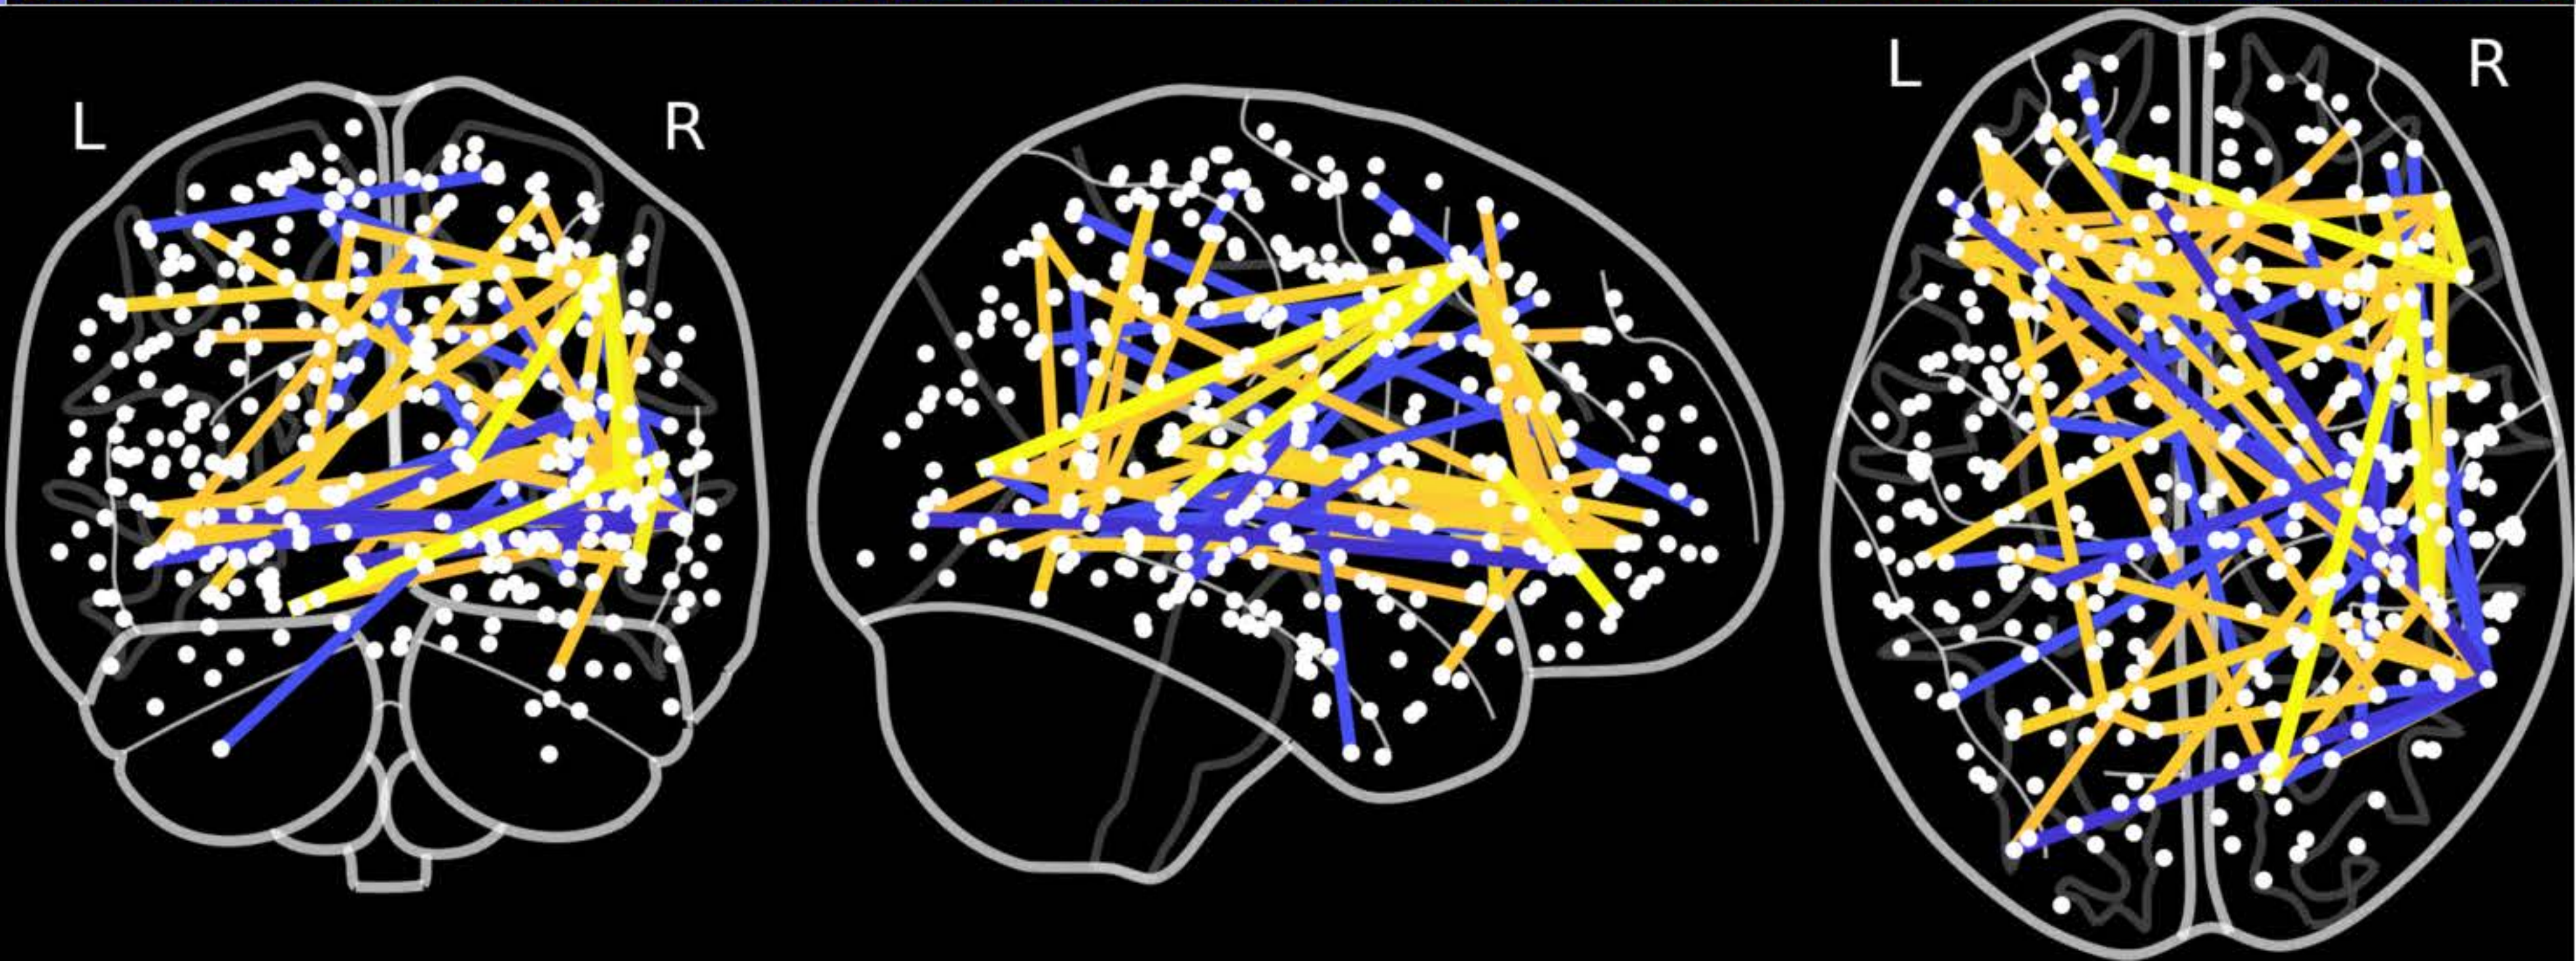



component\_39

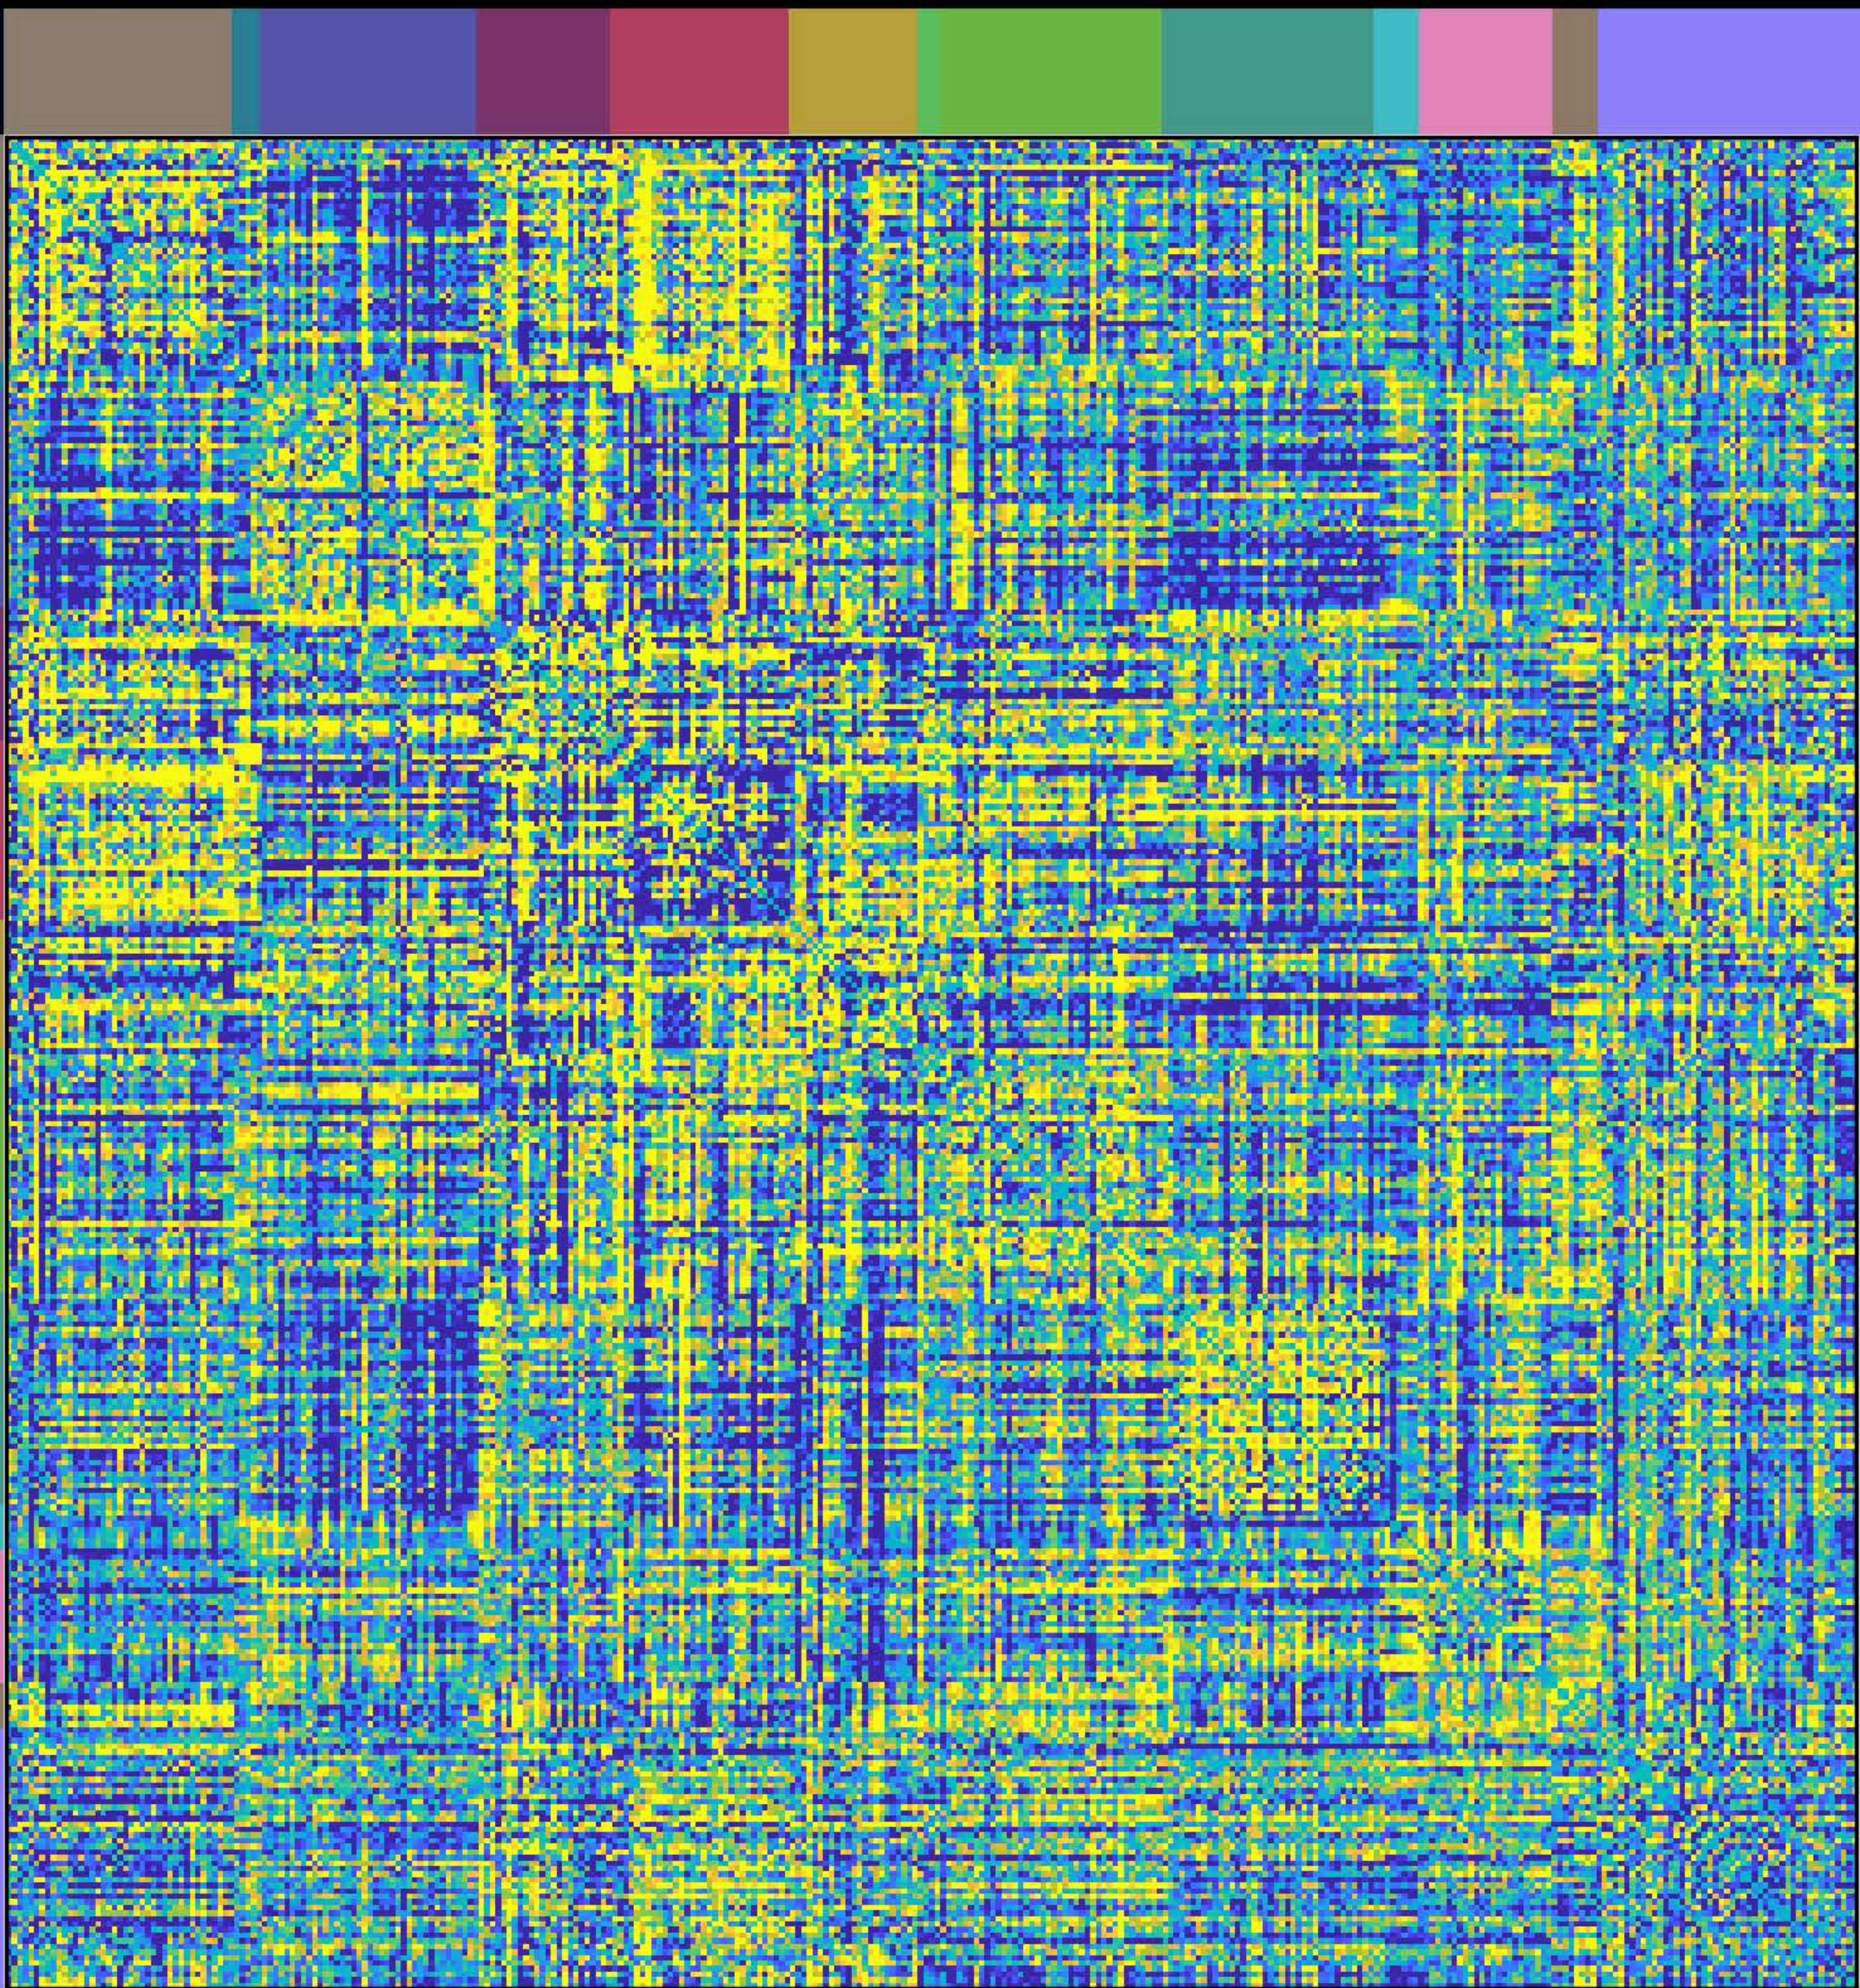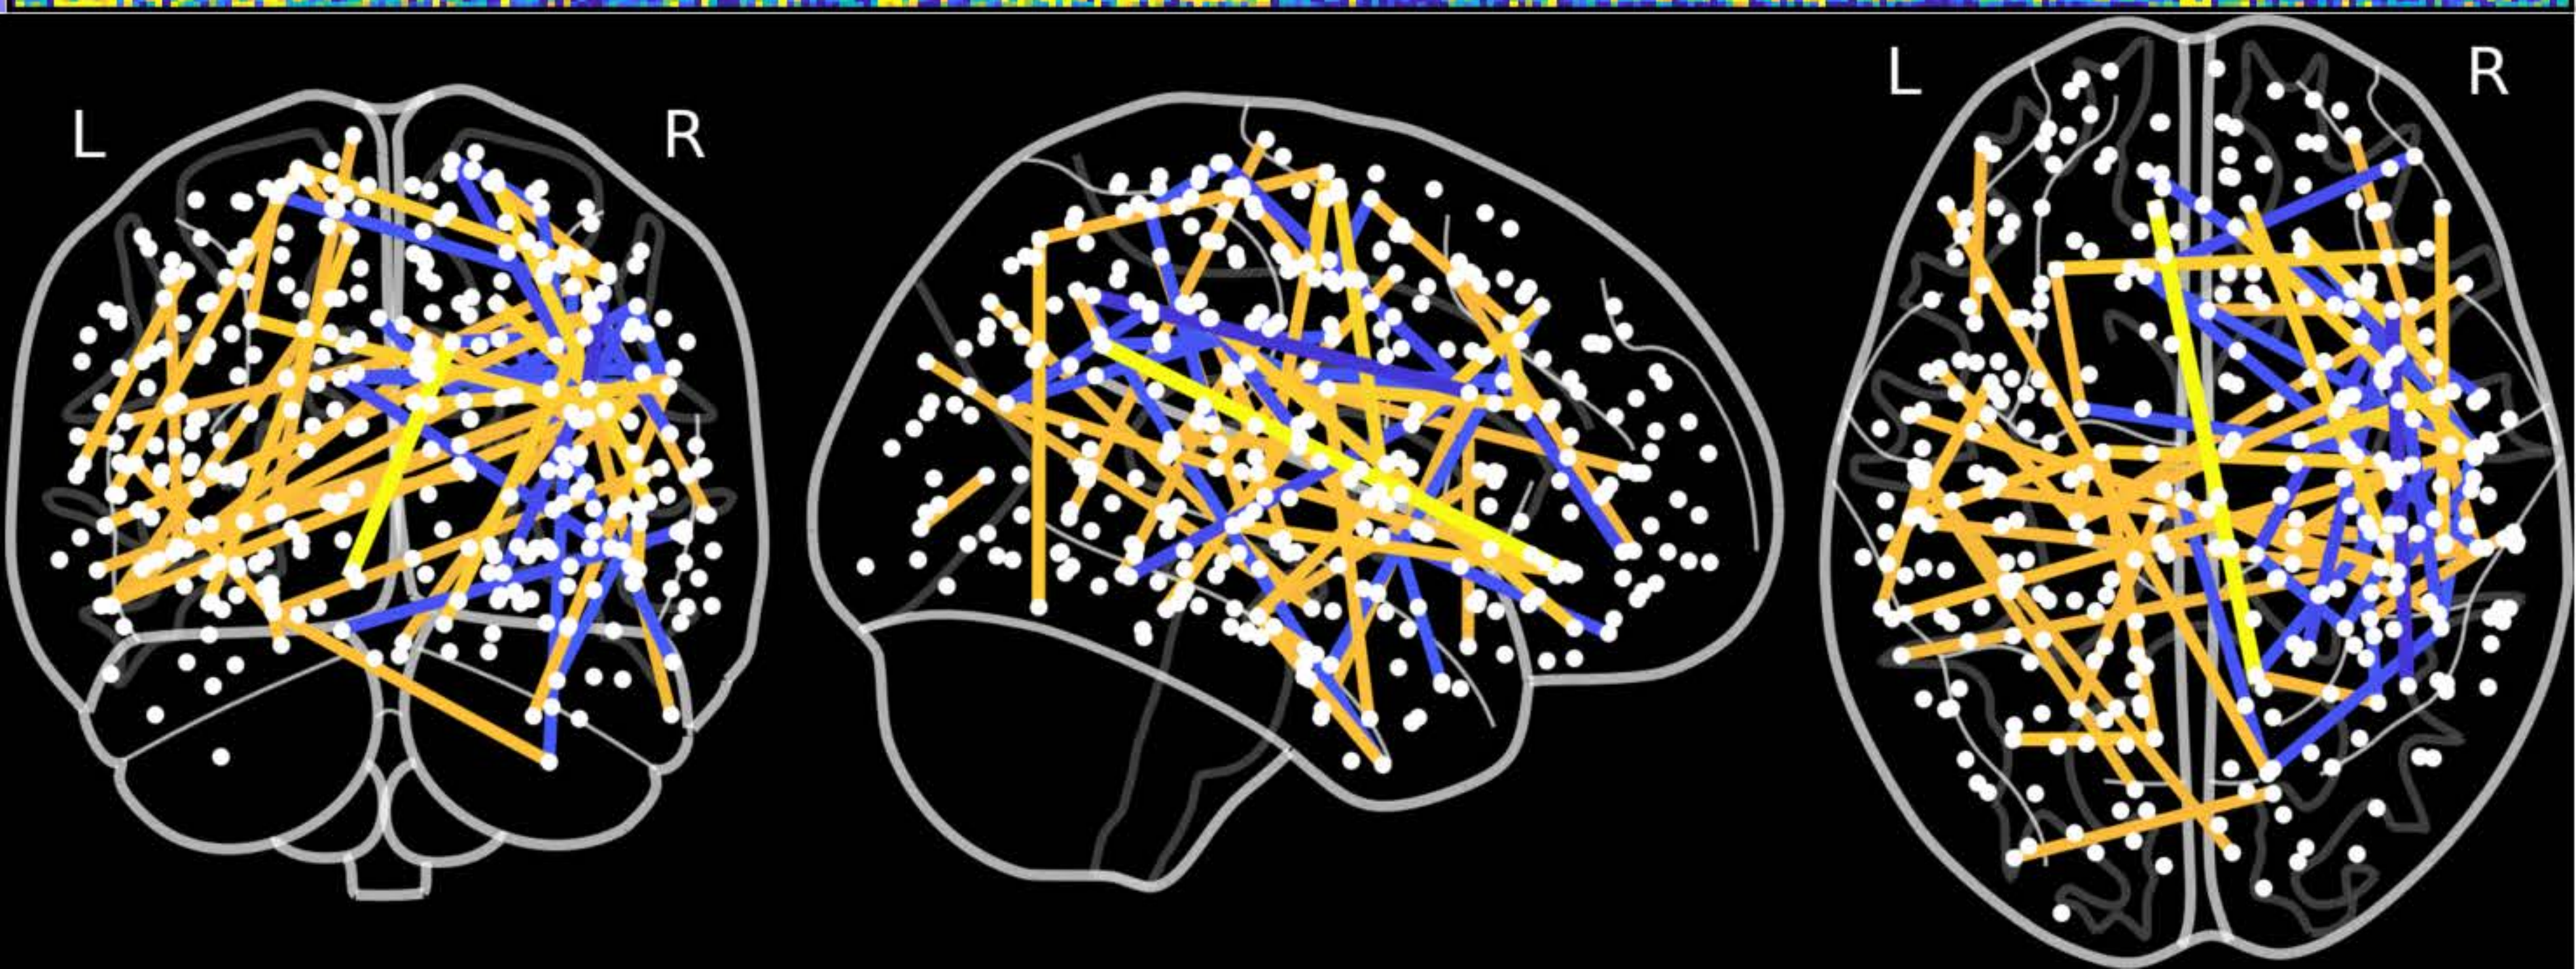



component\_40

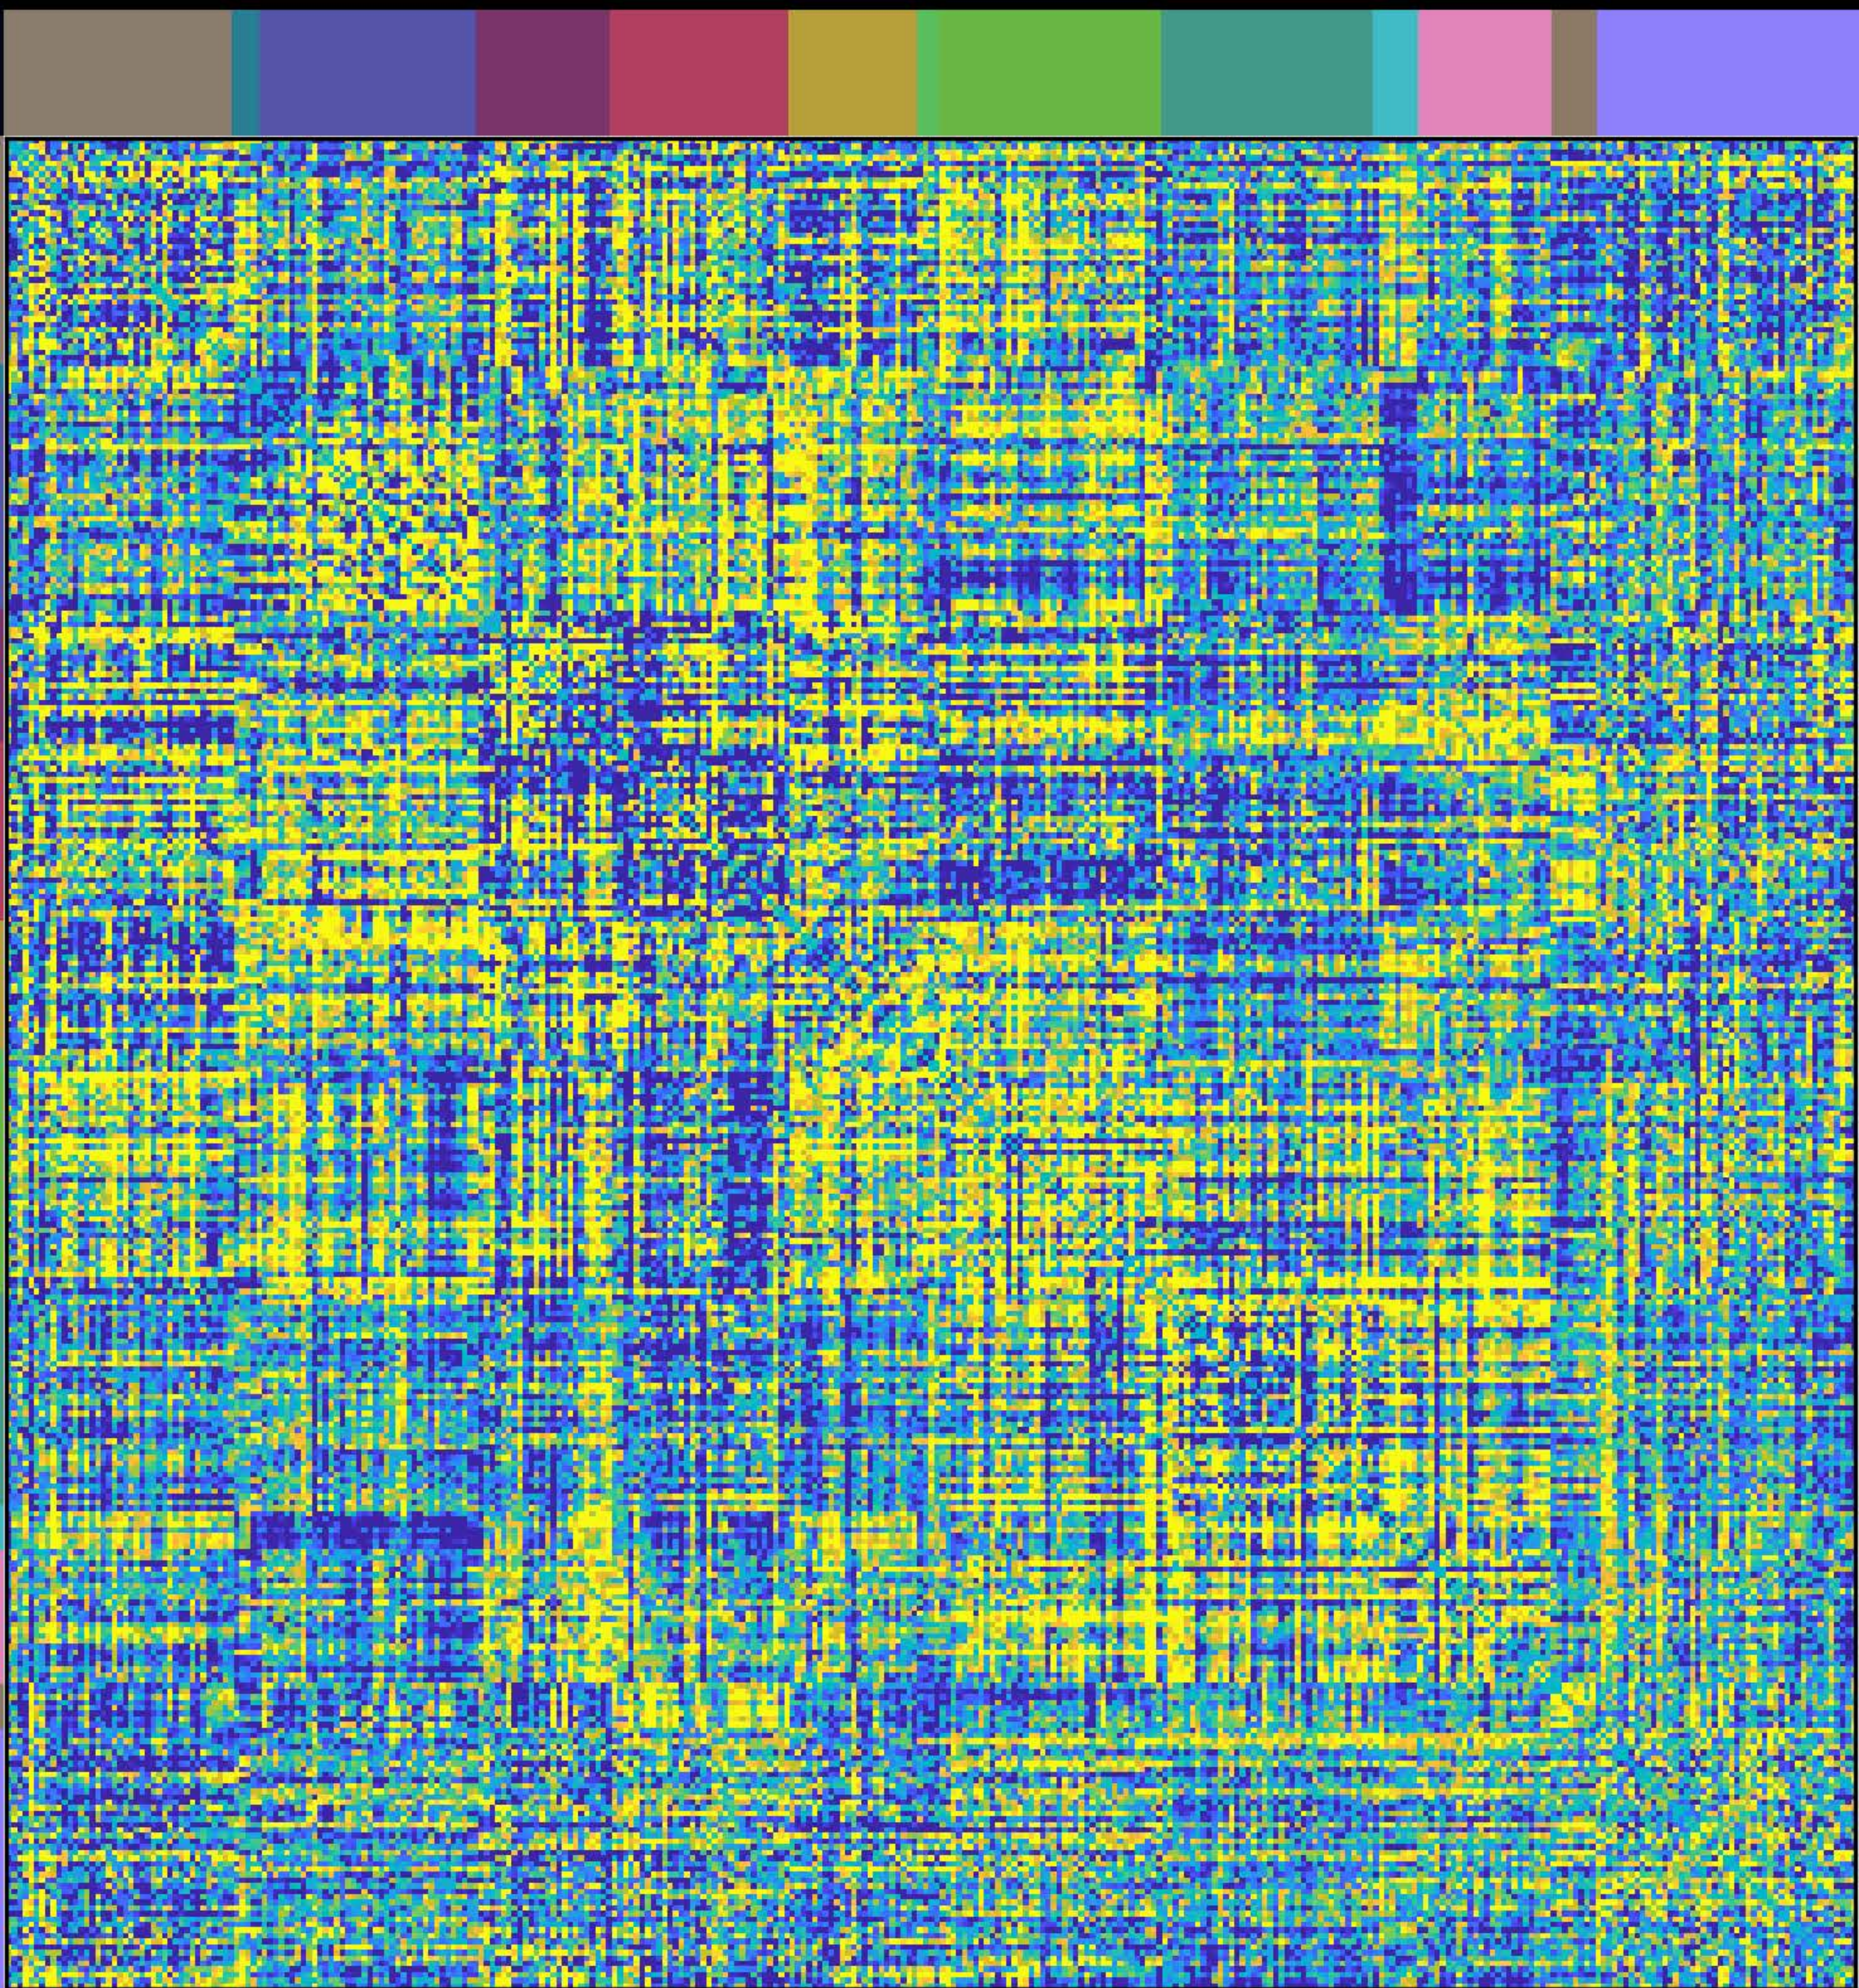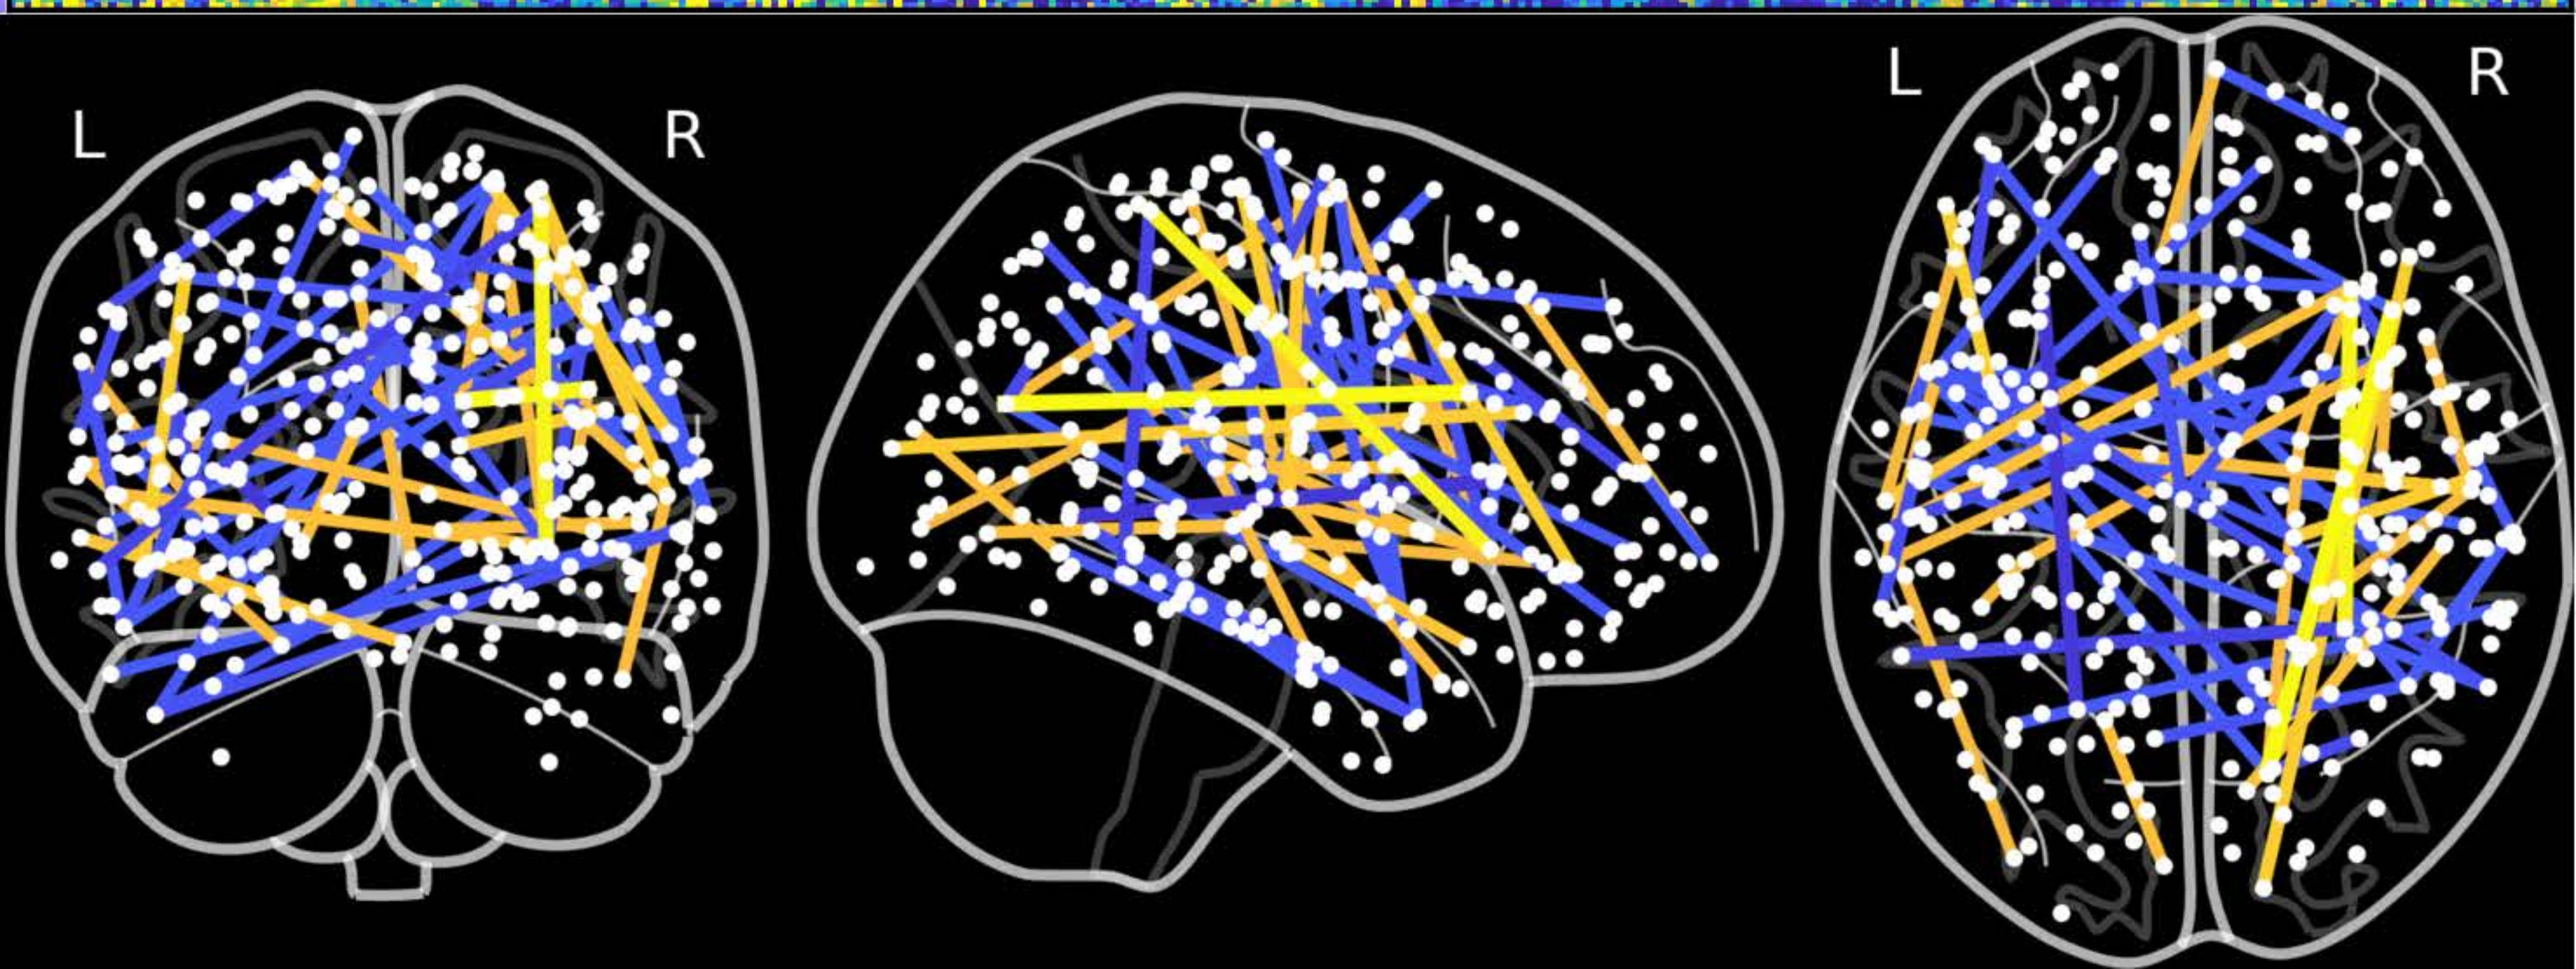



component\_41

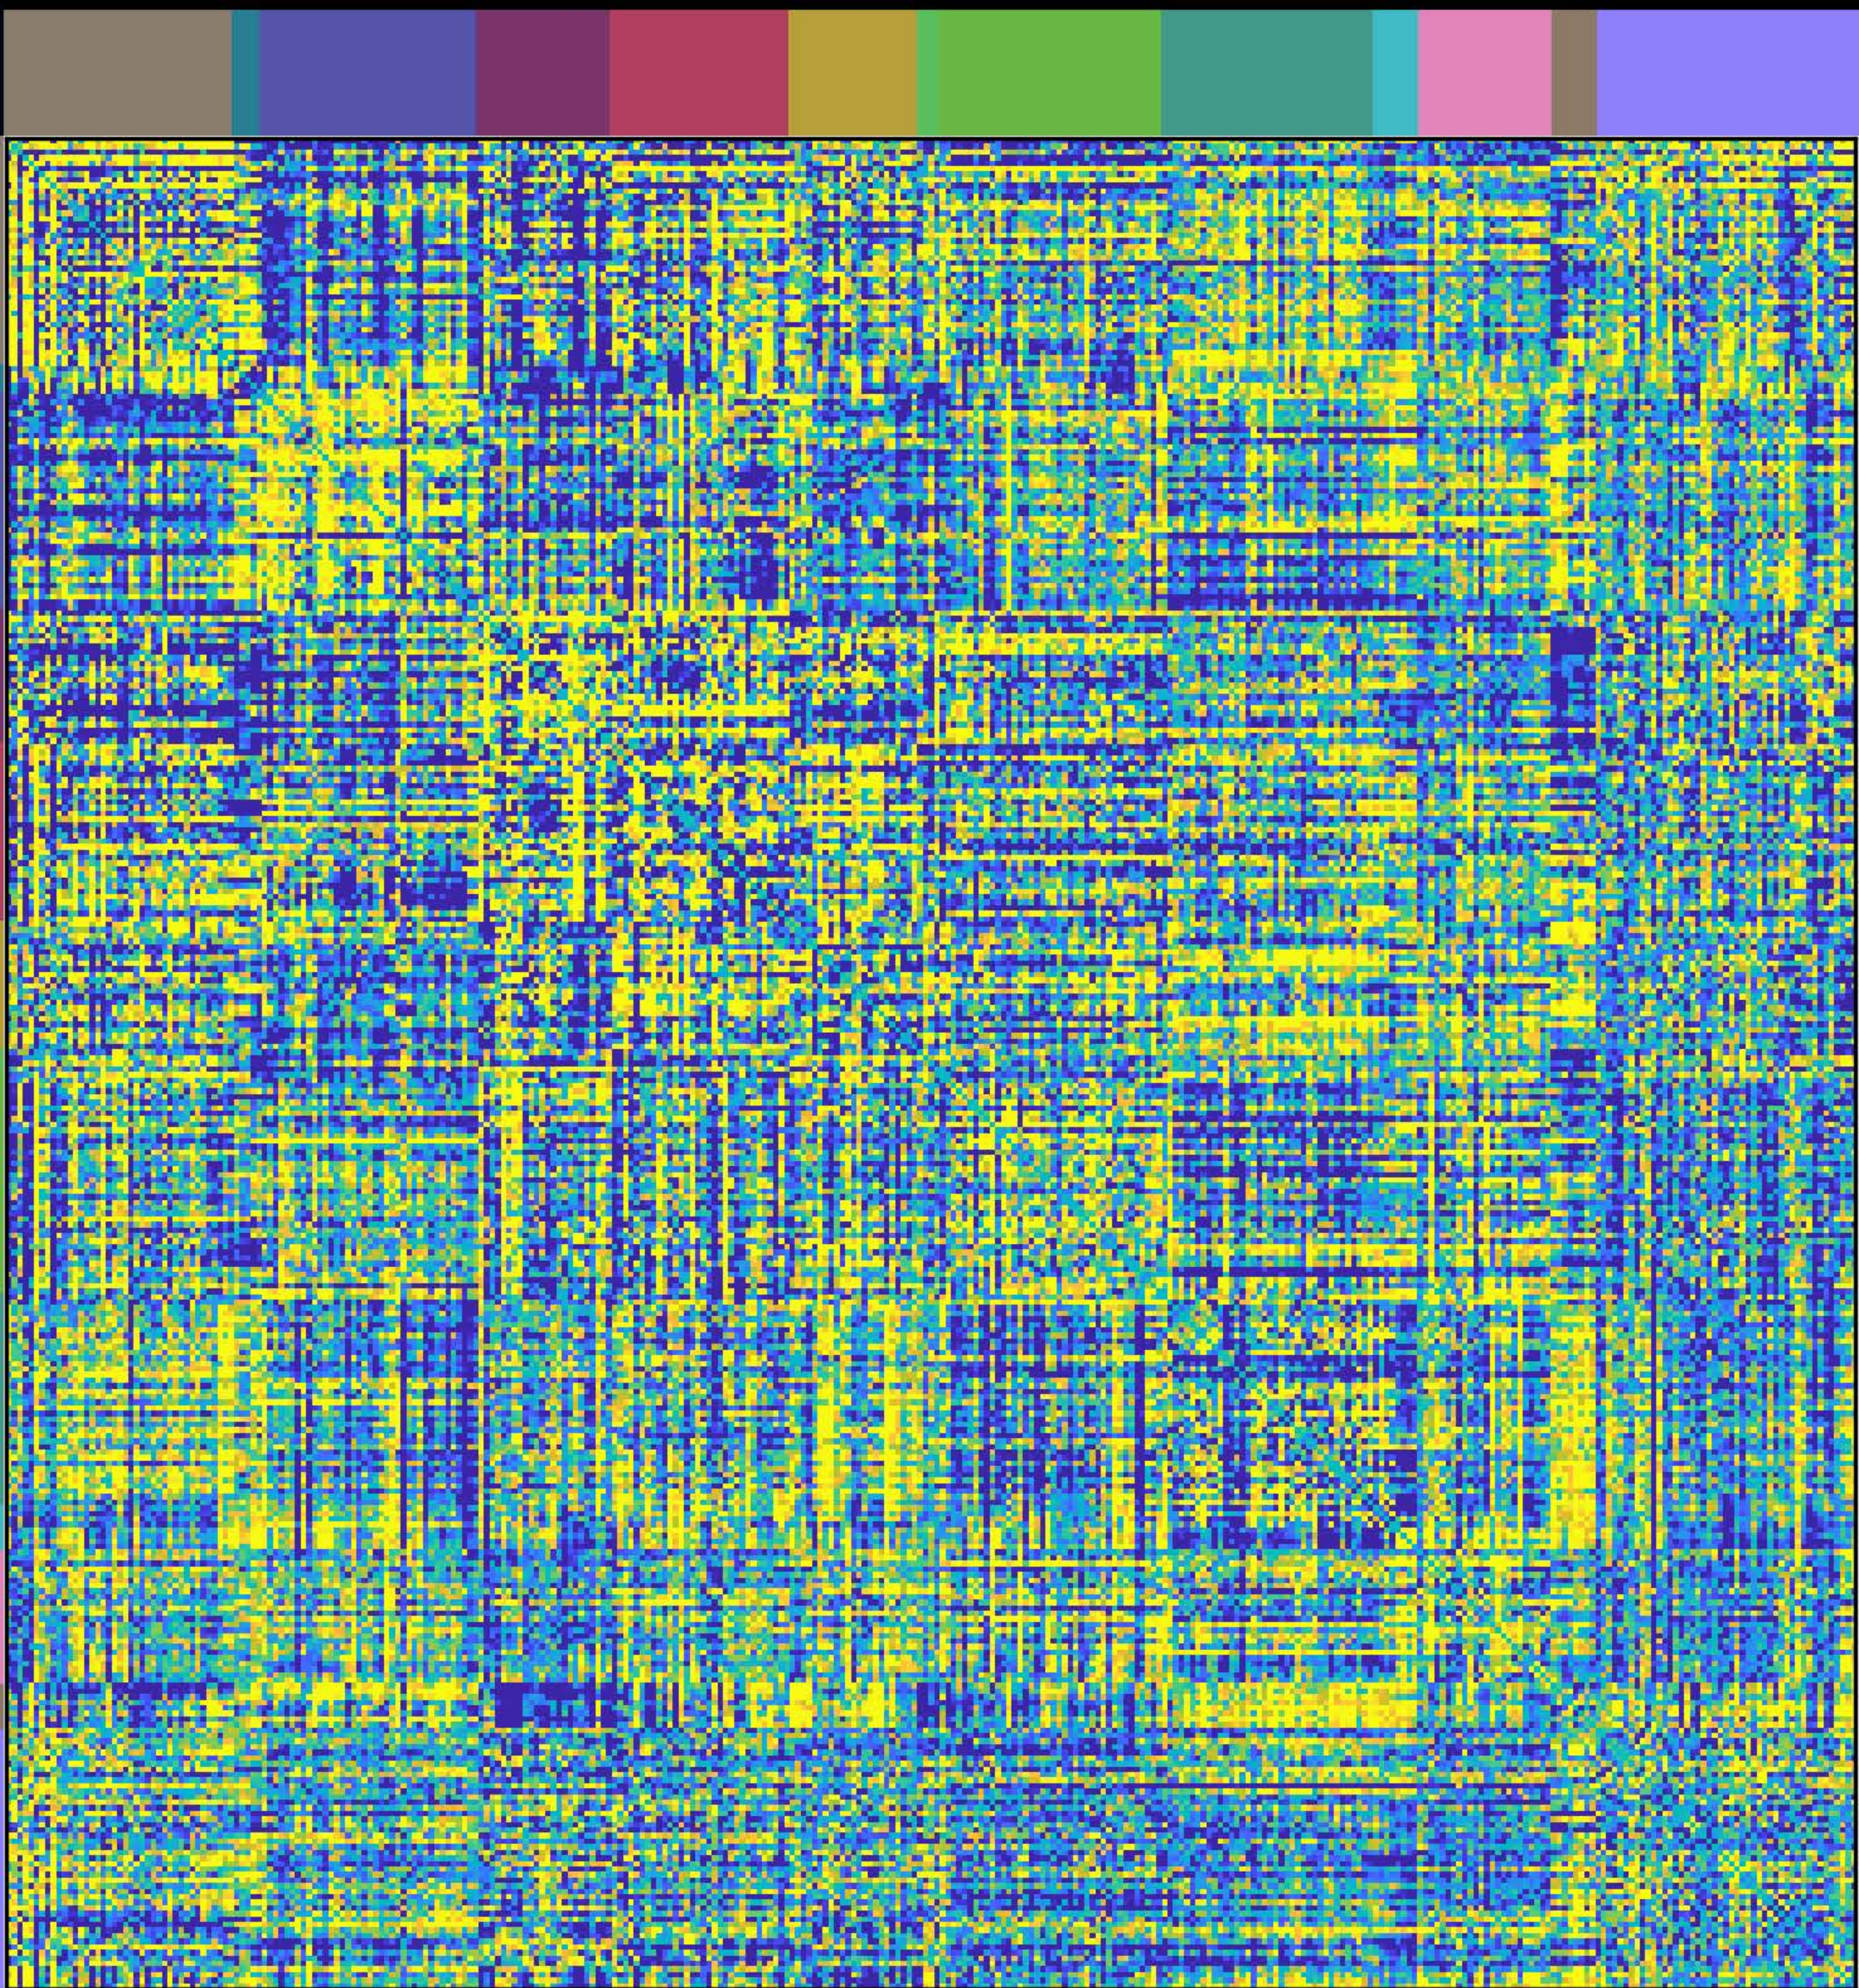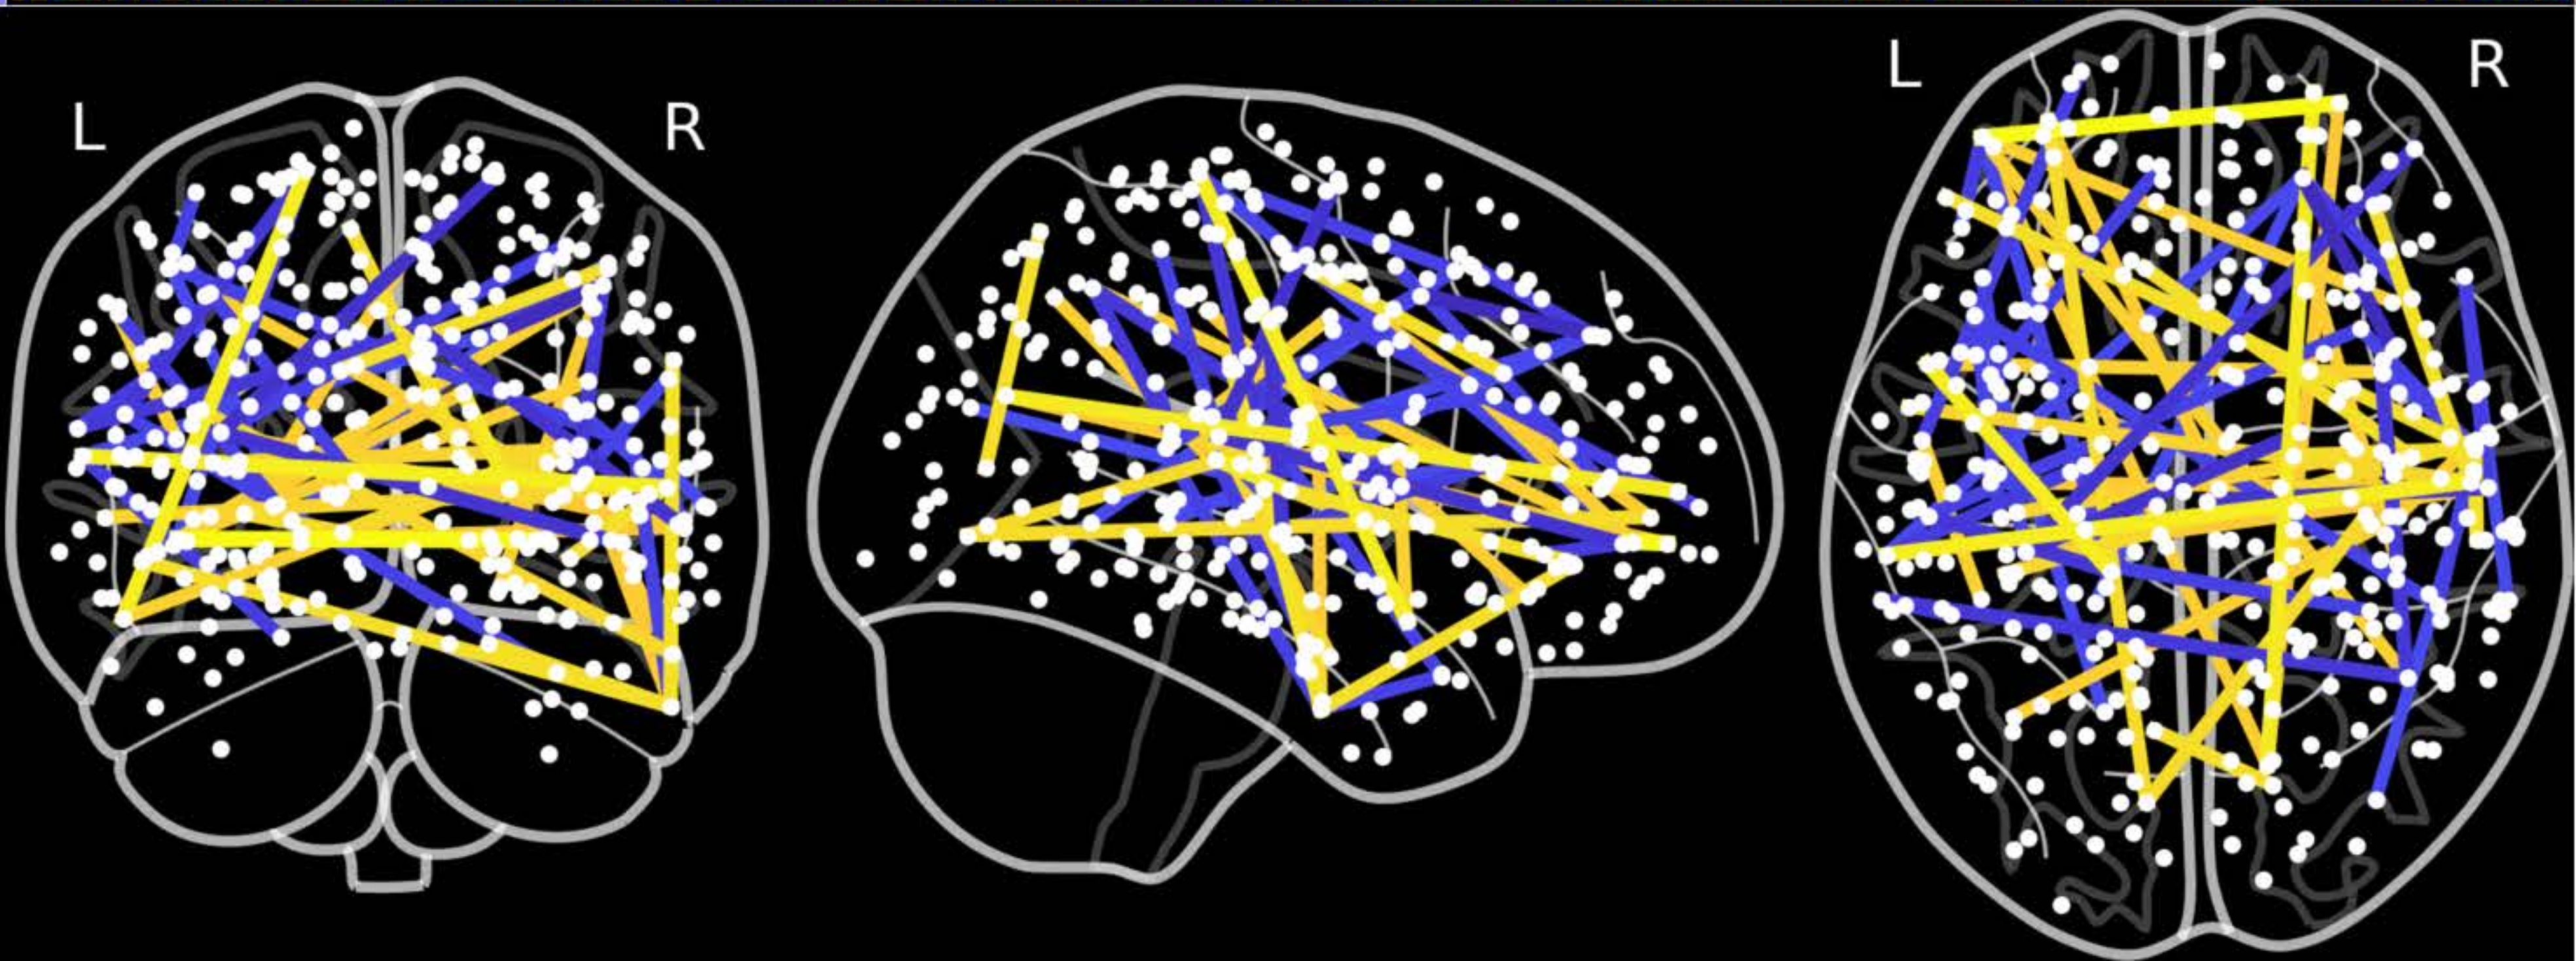



component\_42

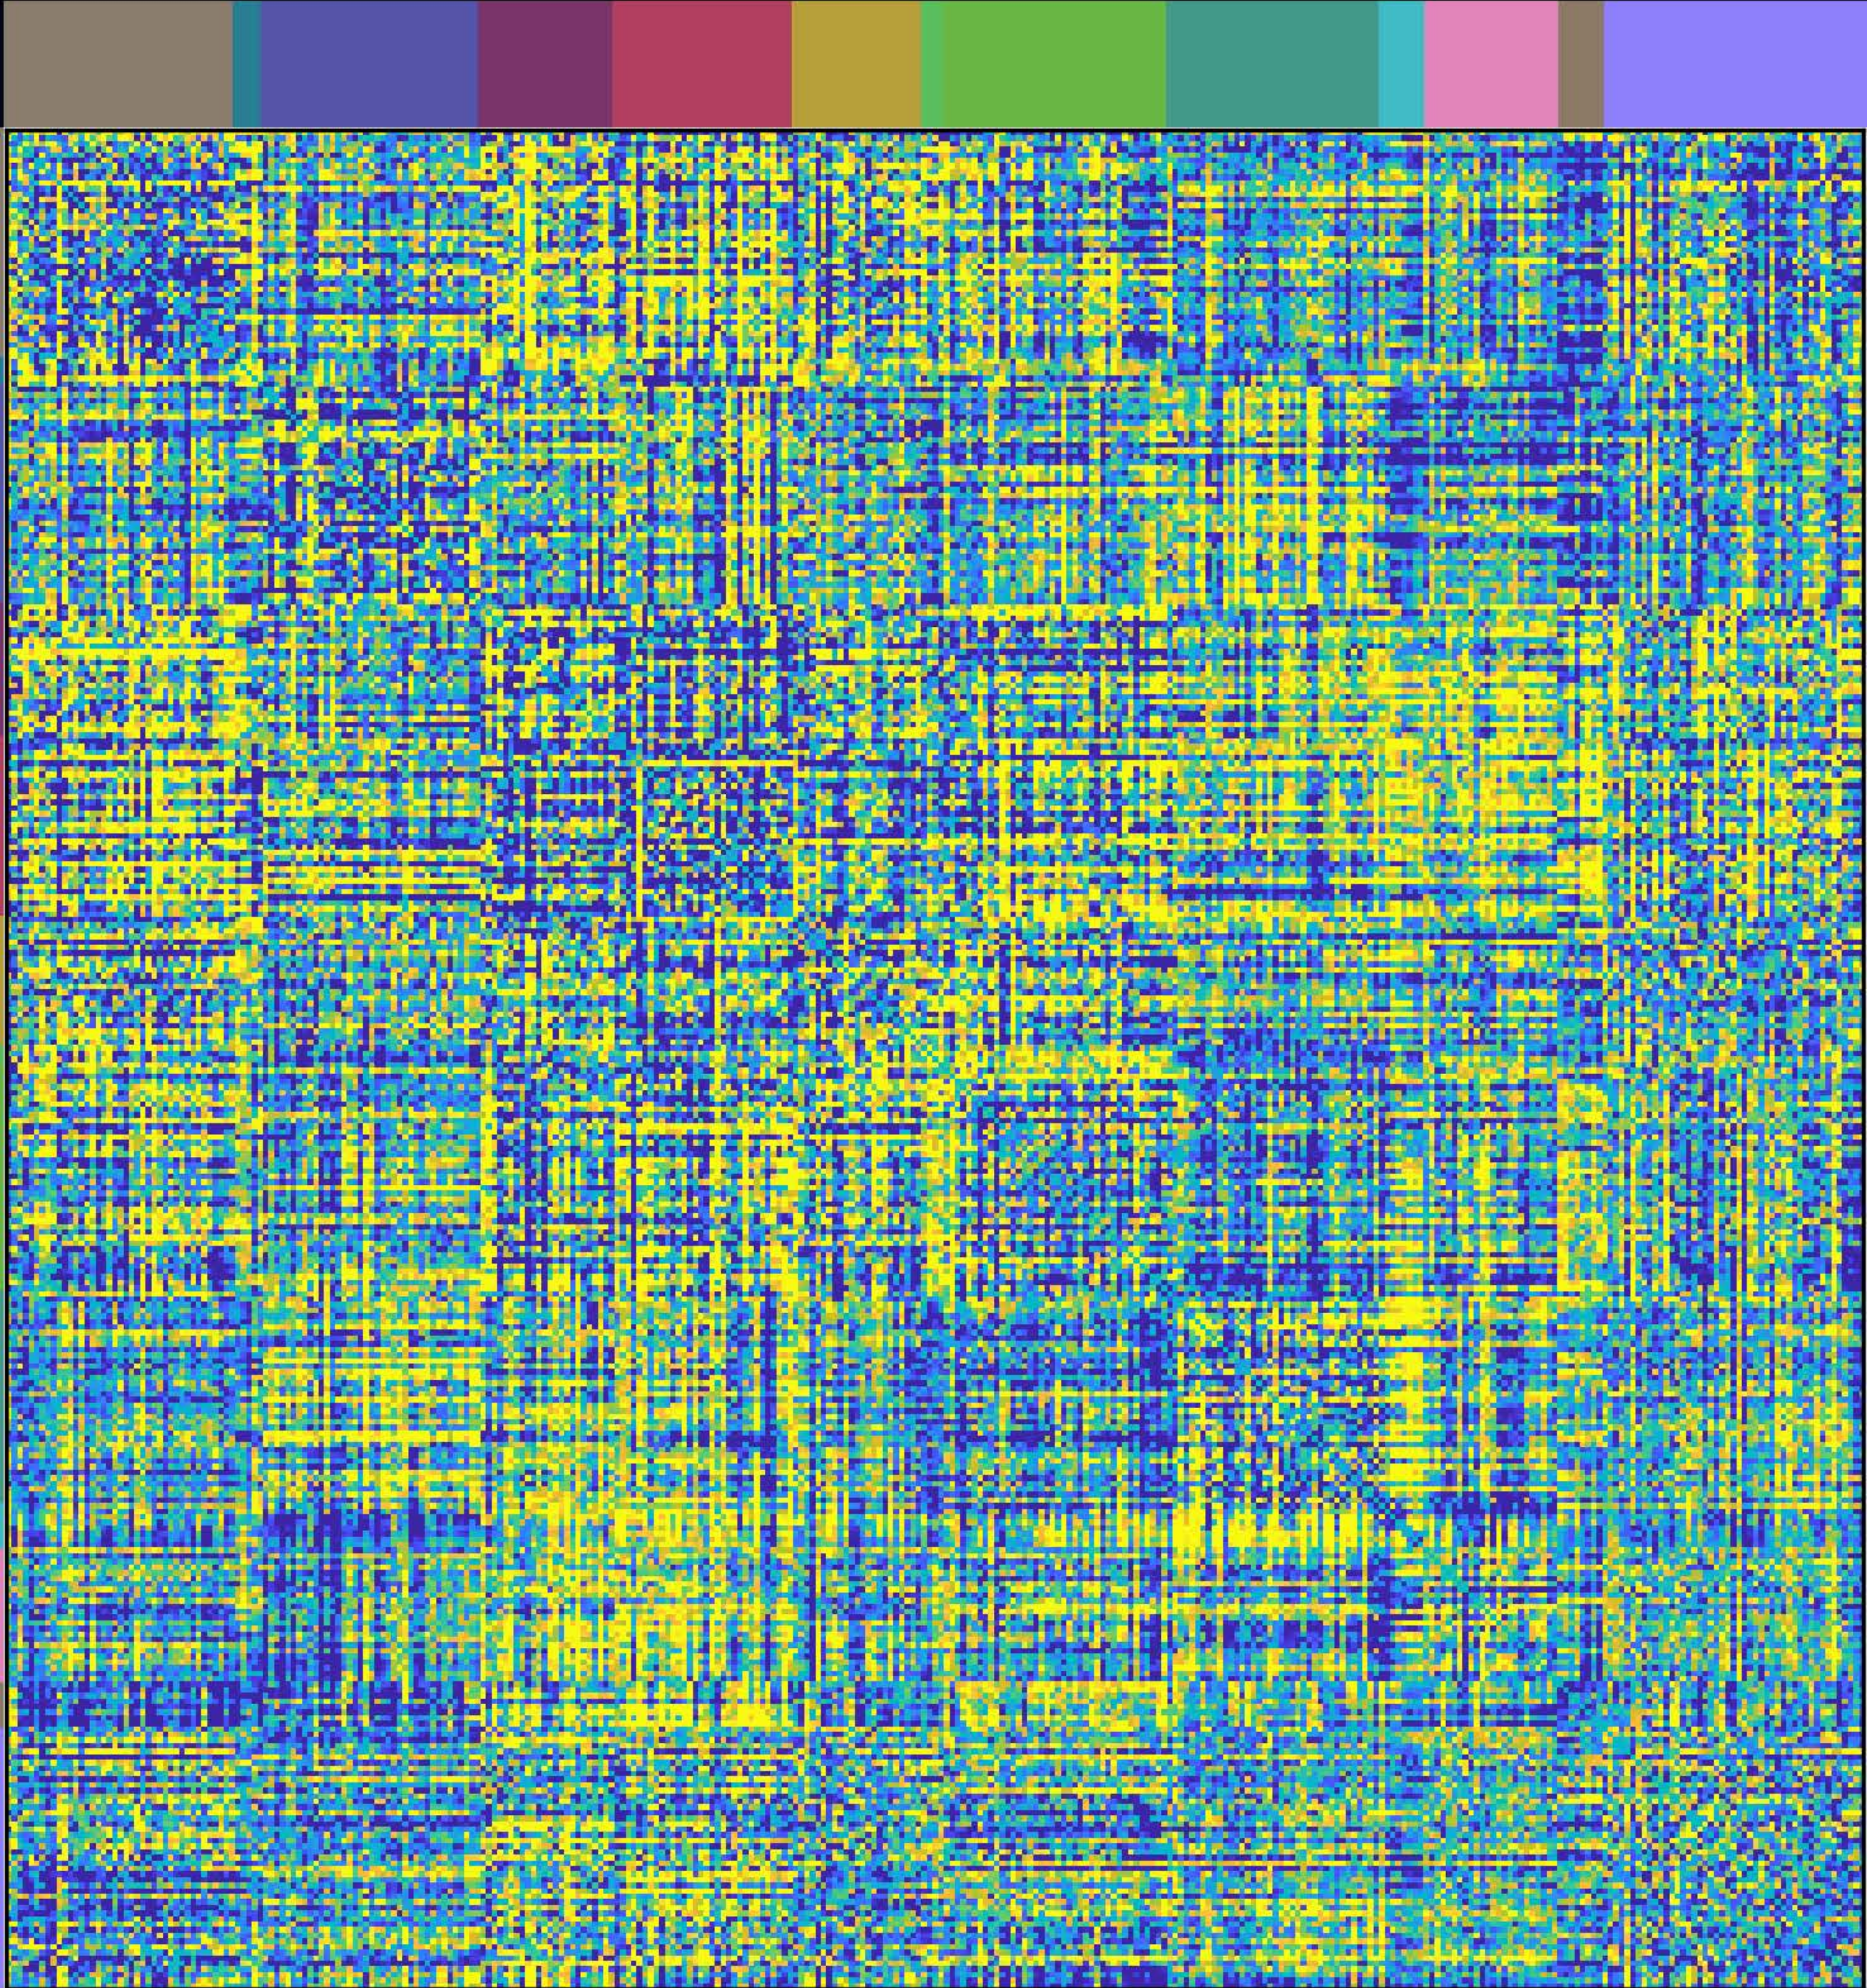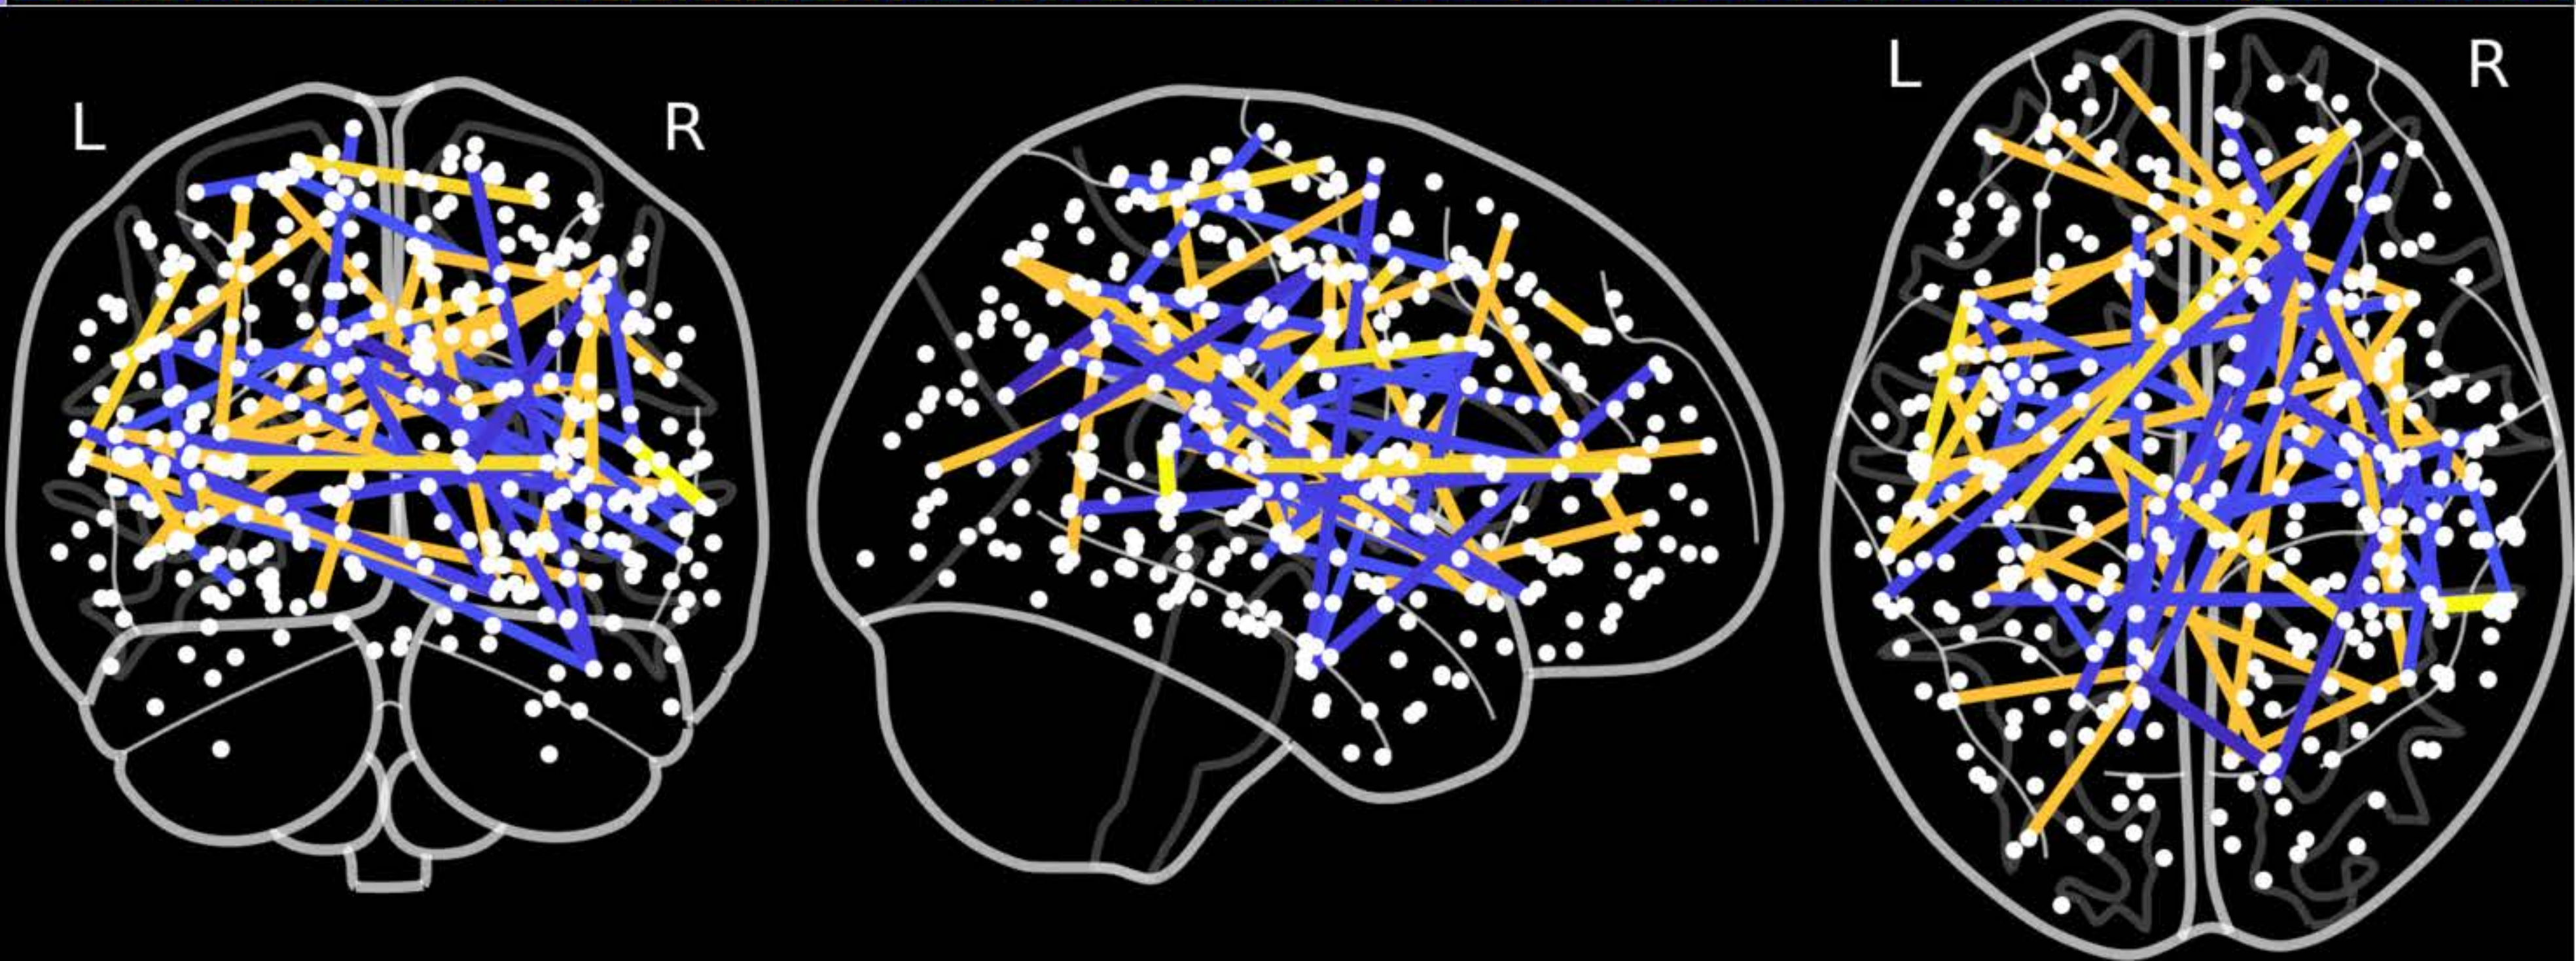



component\_43

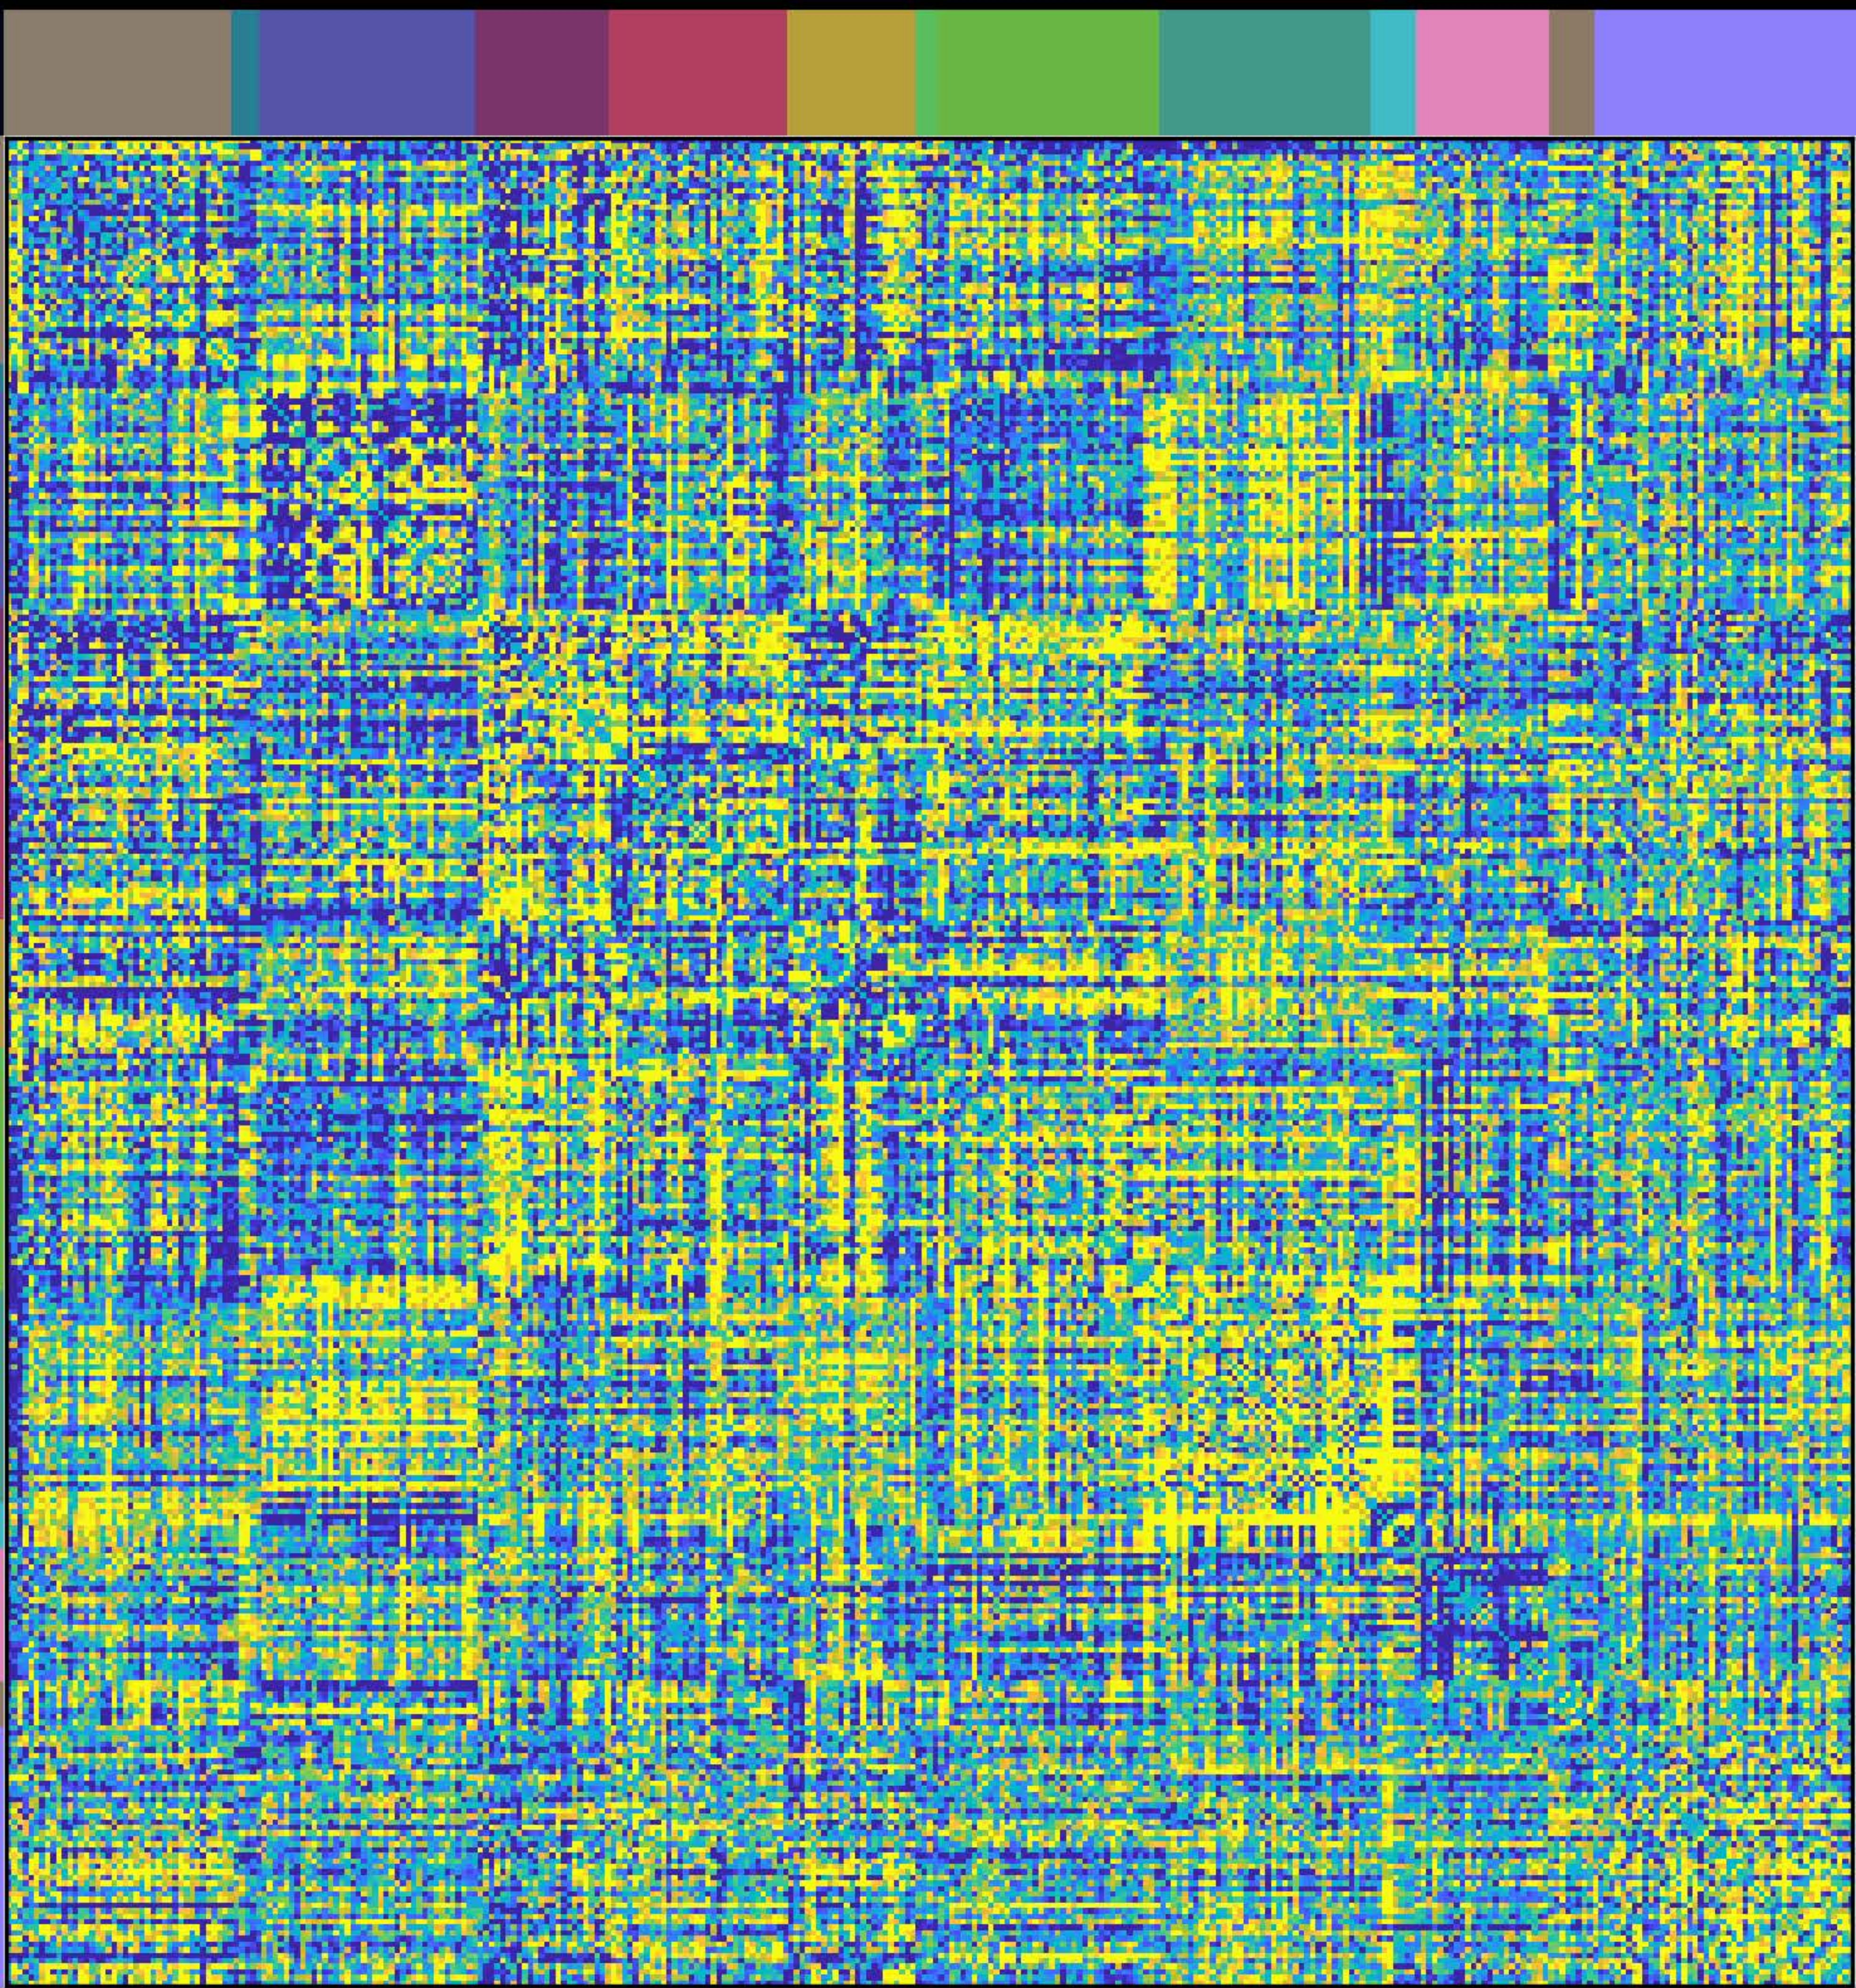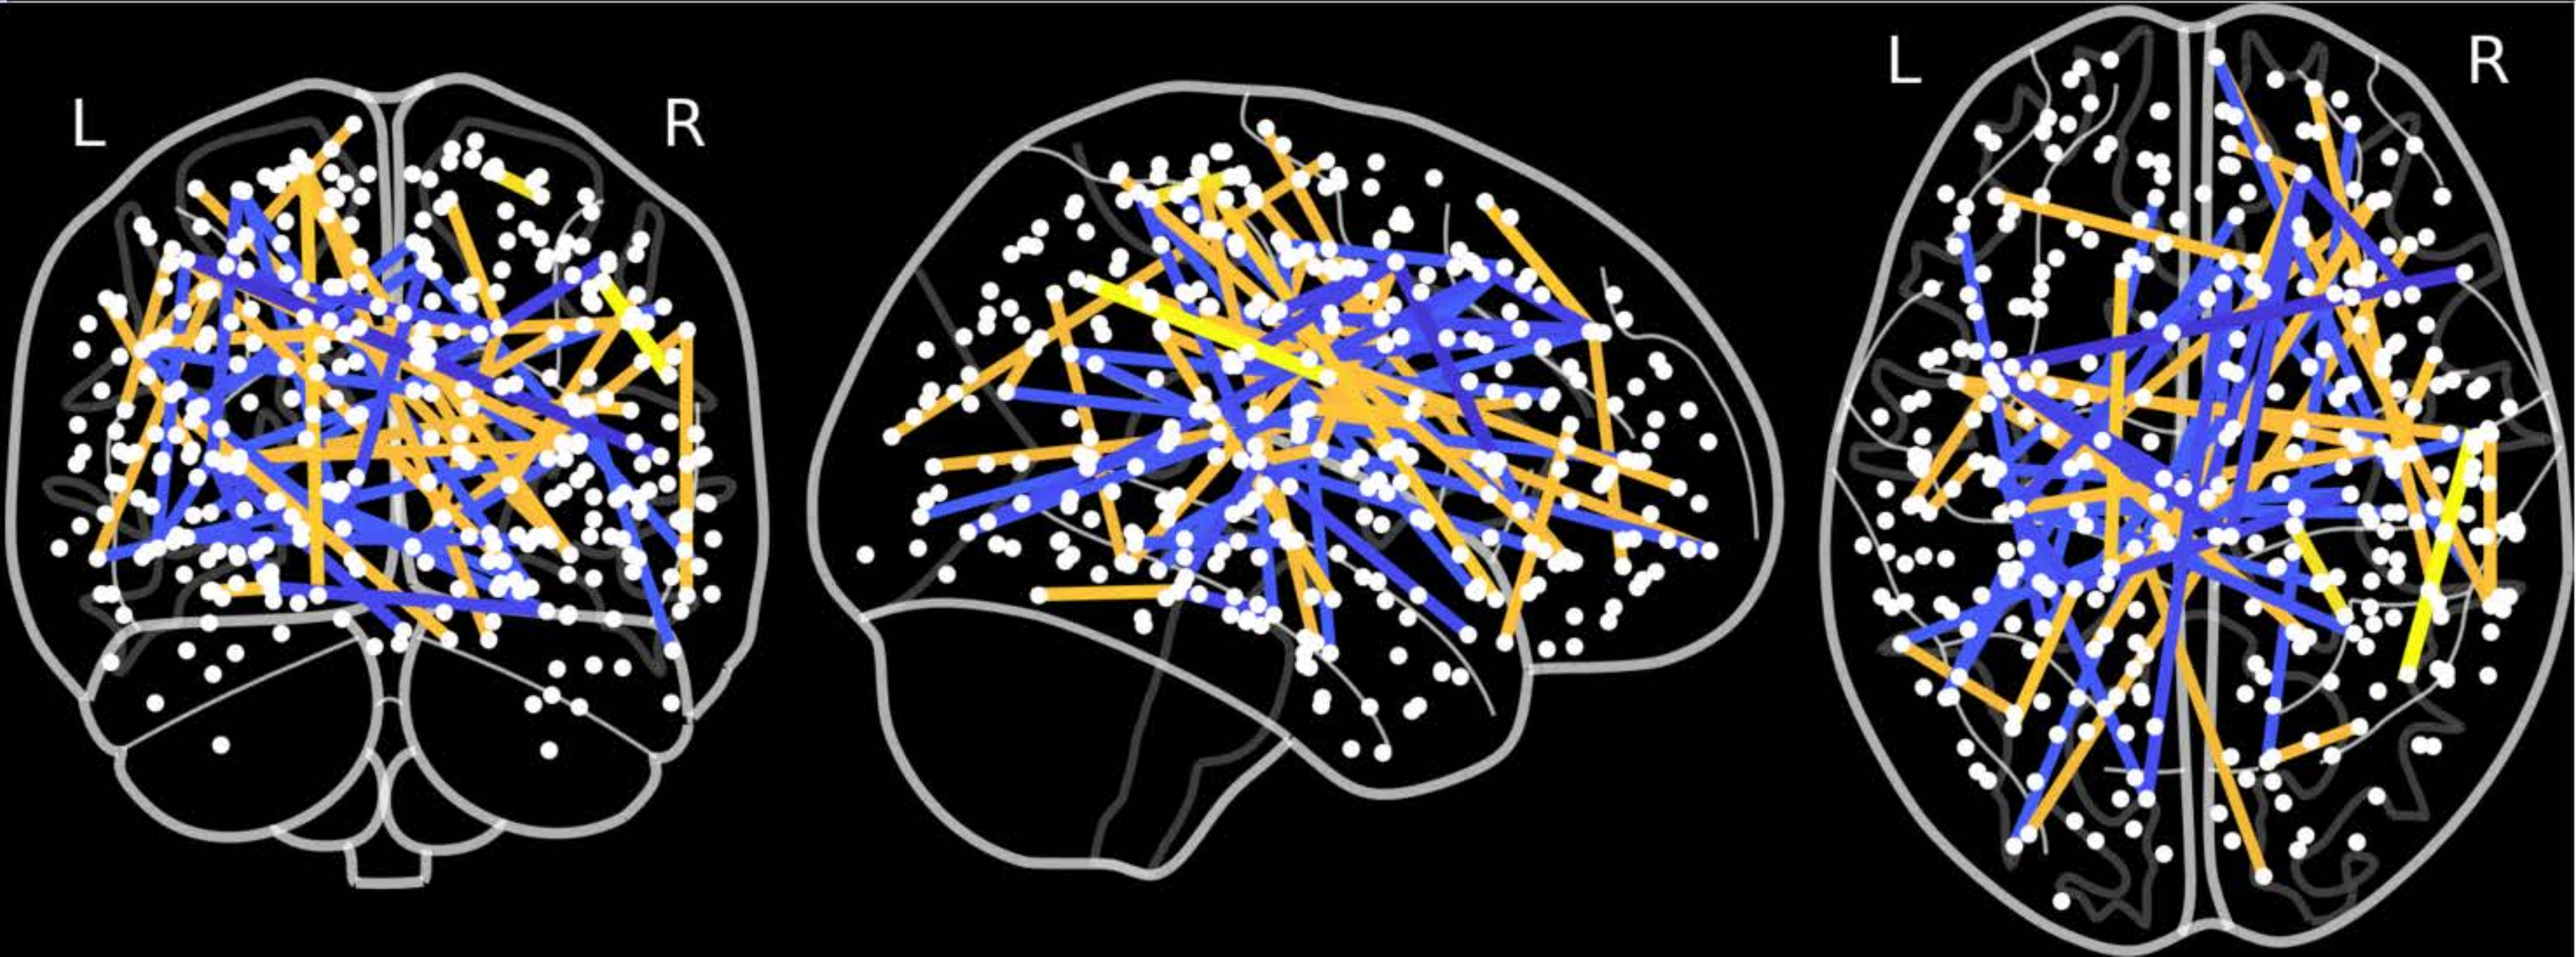



component\_44

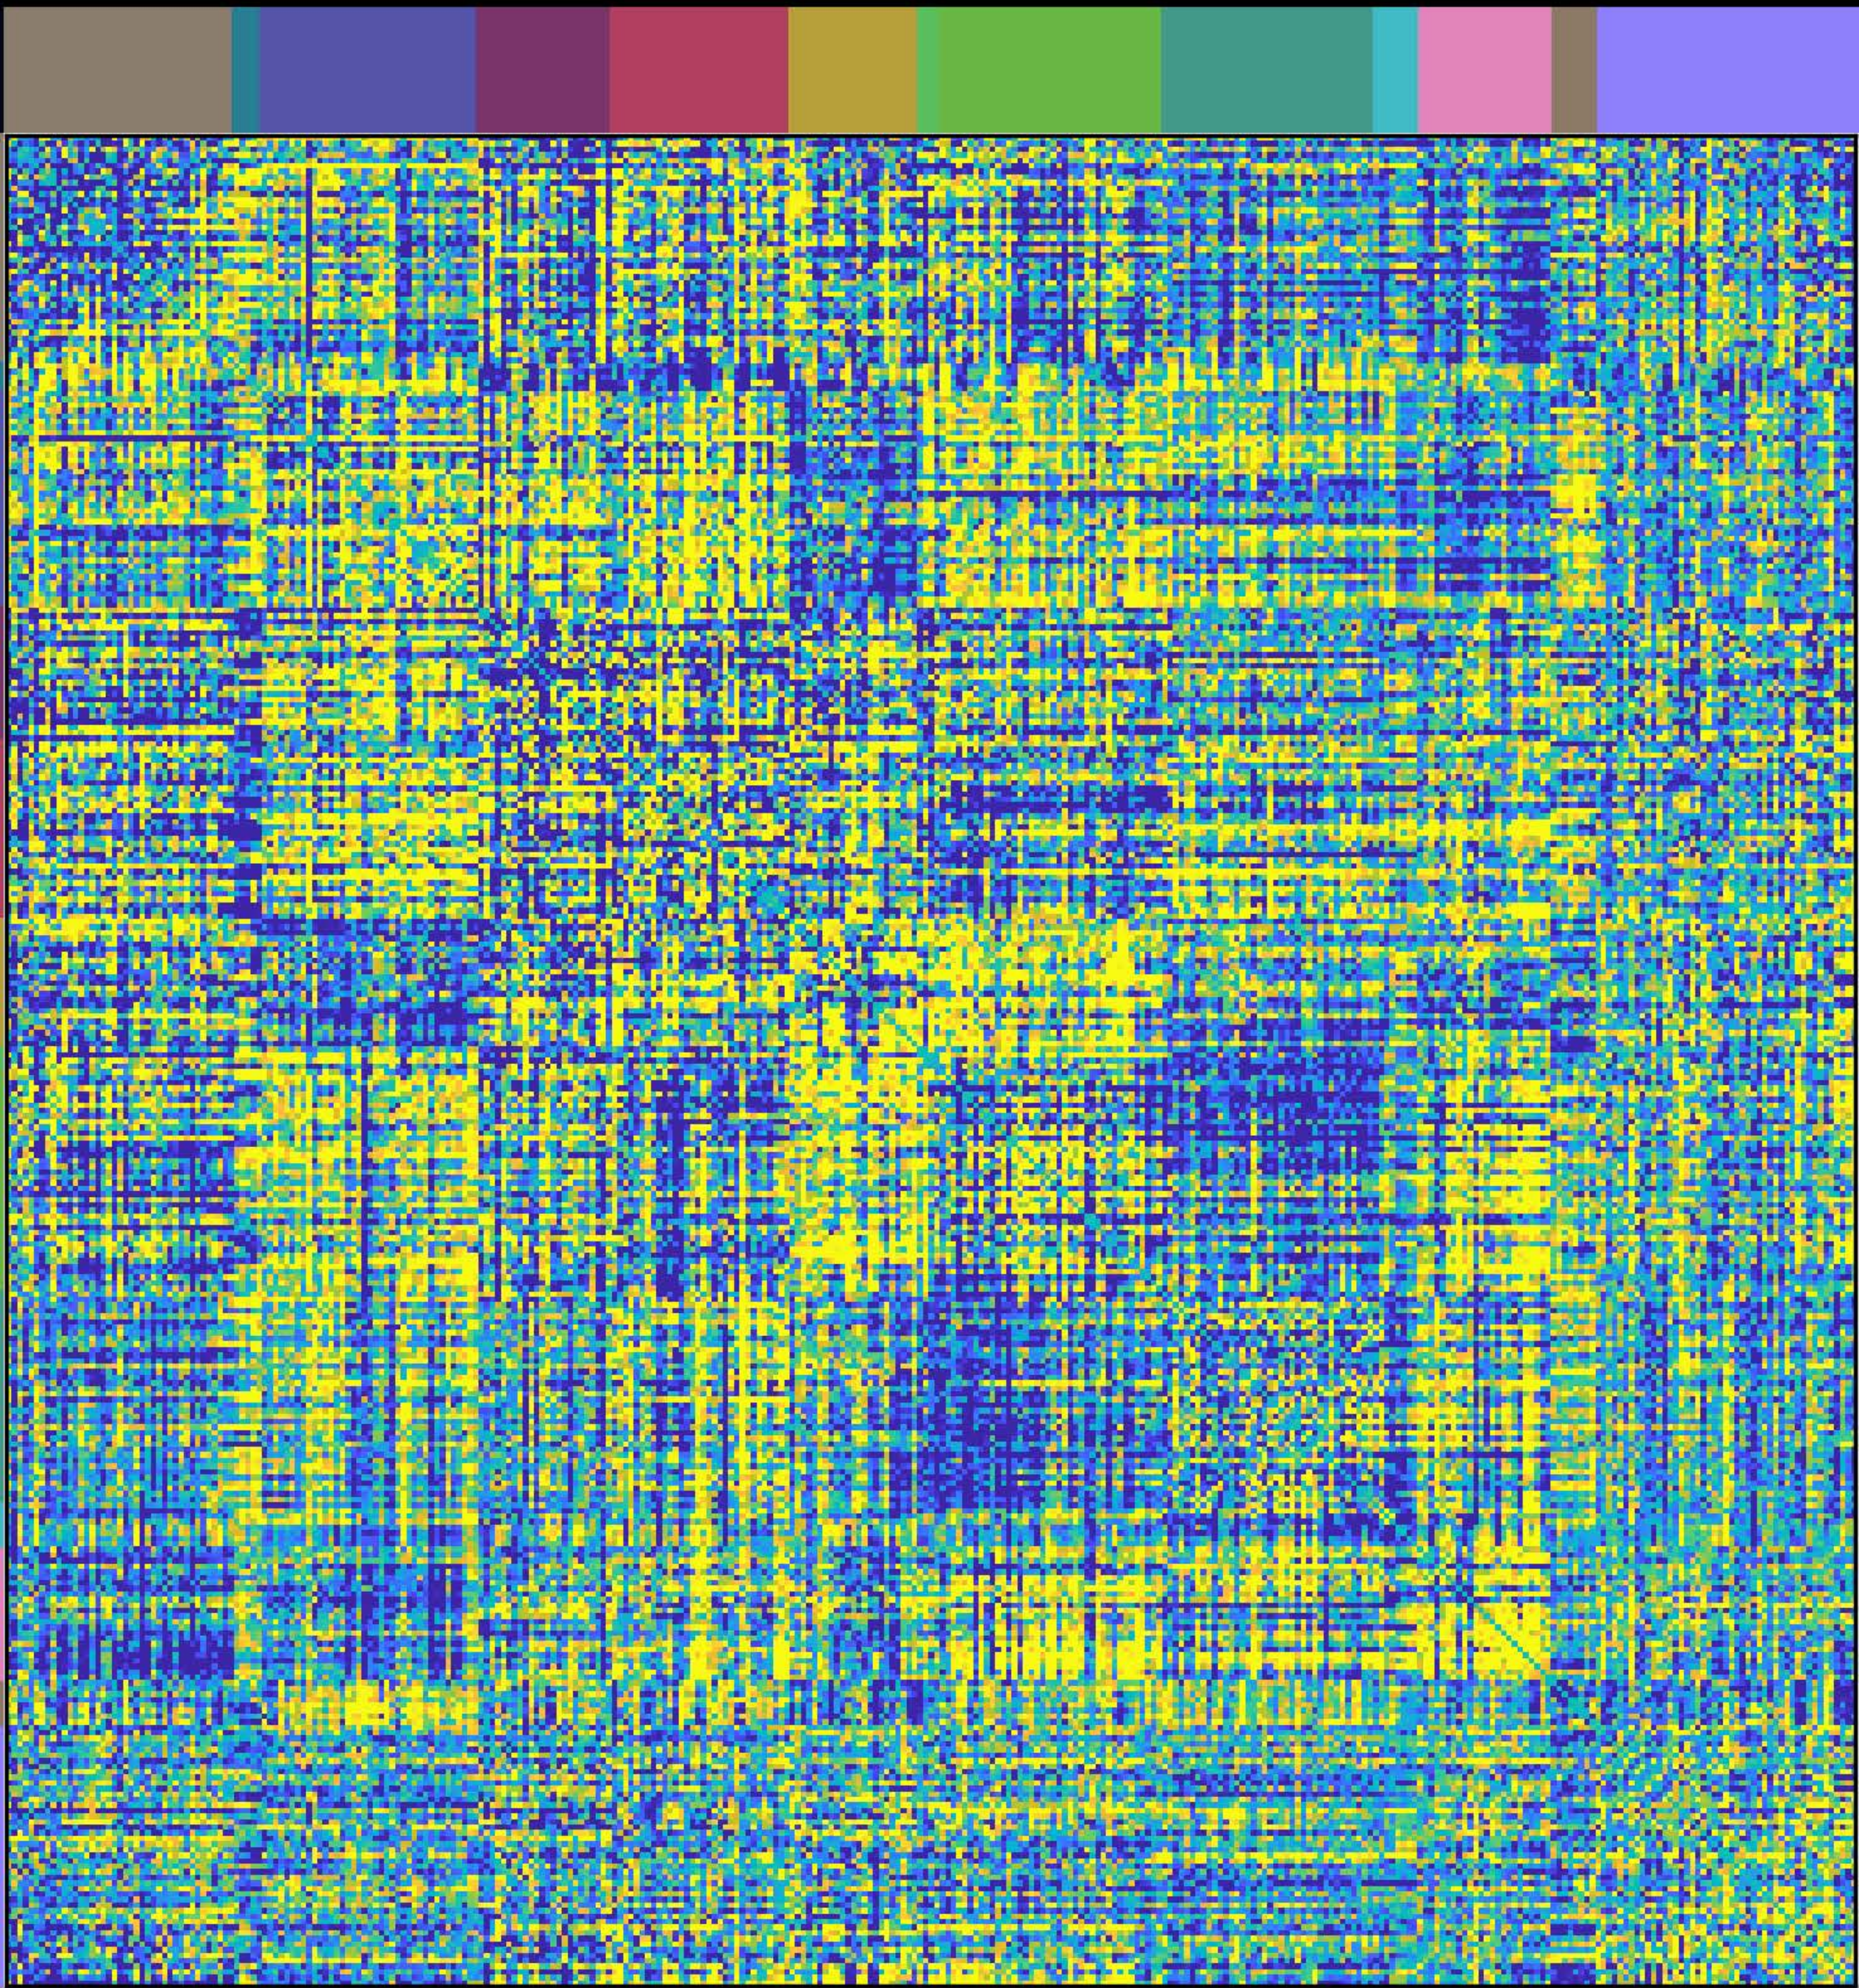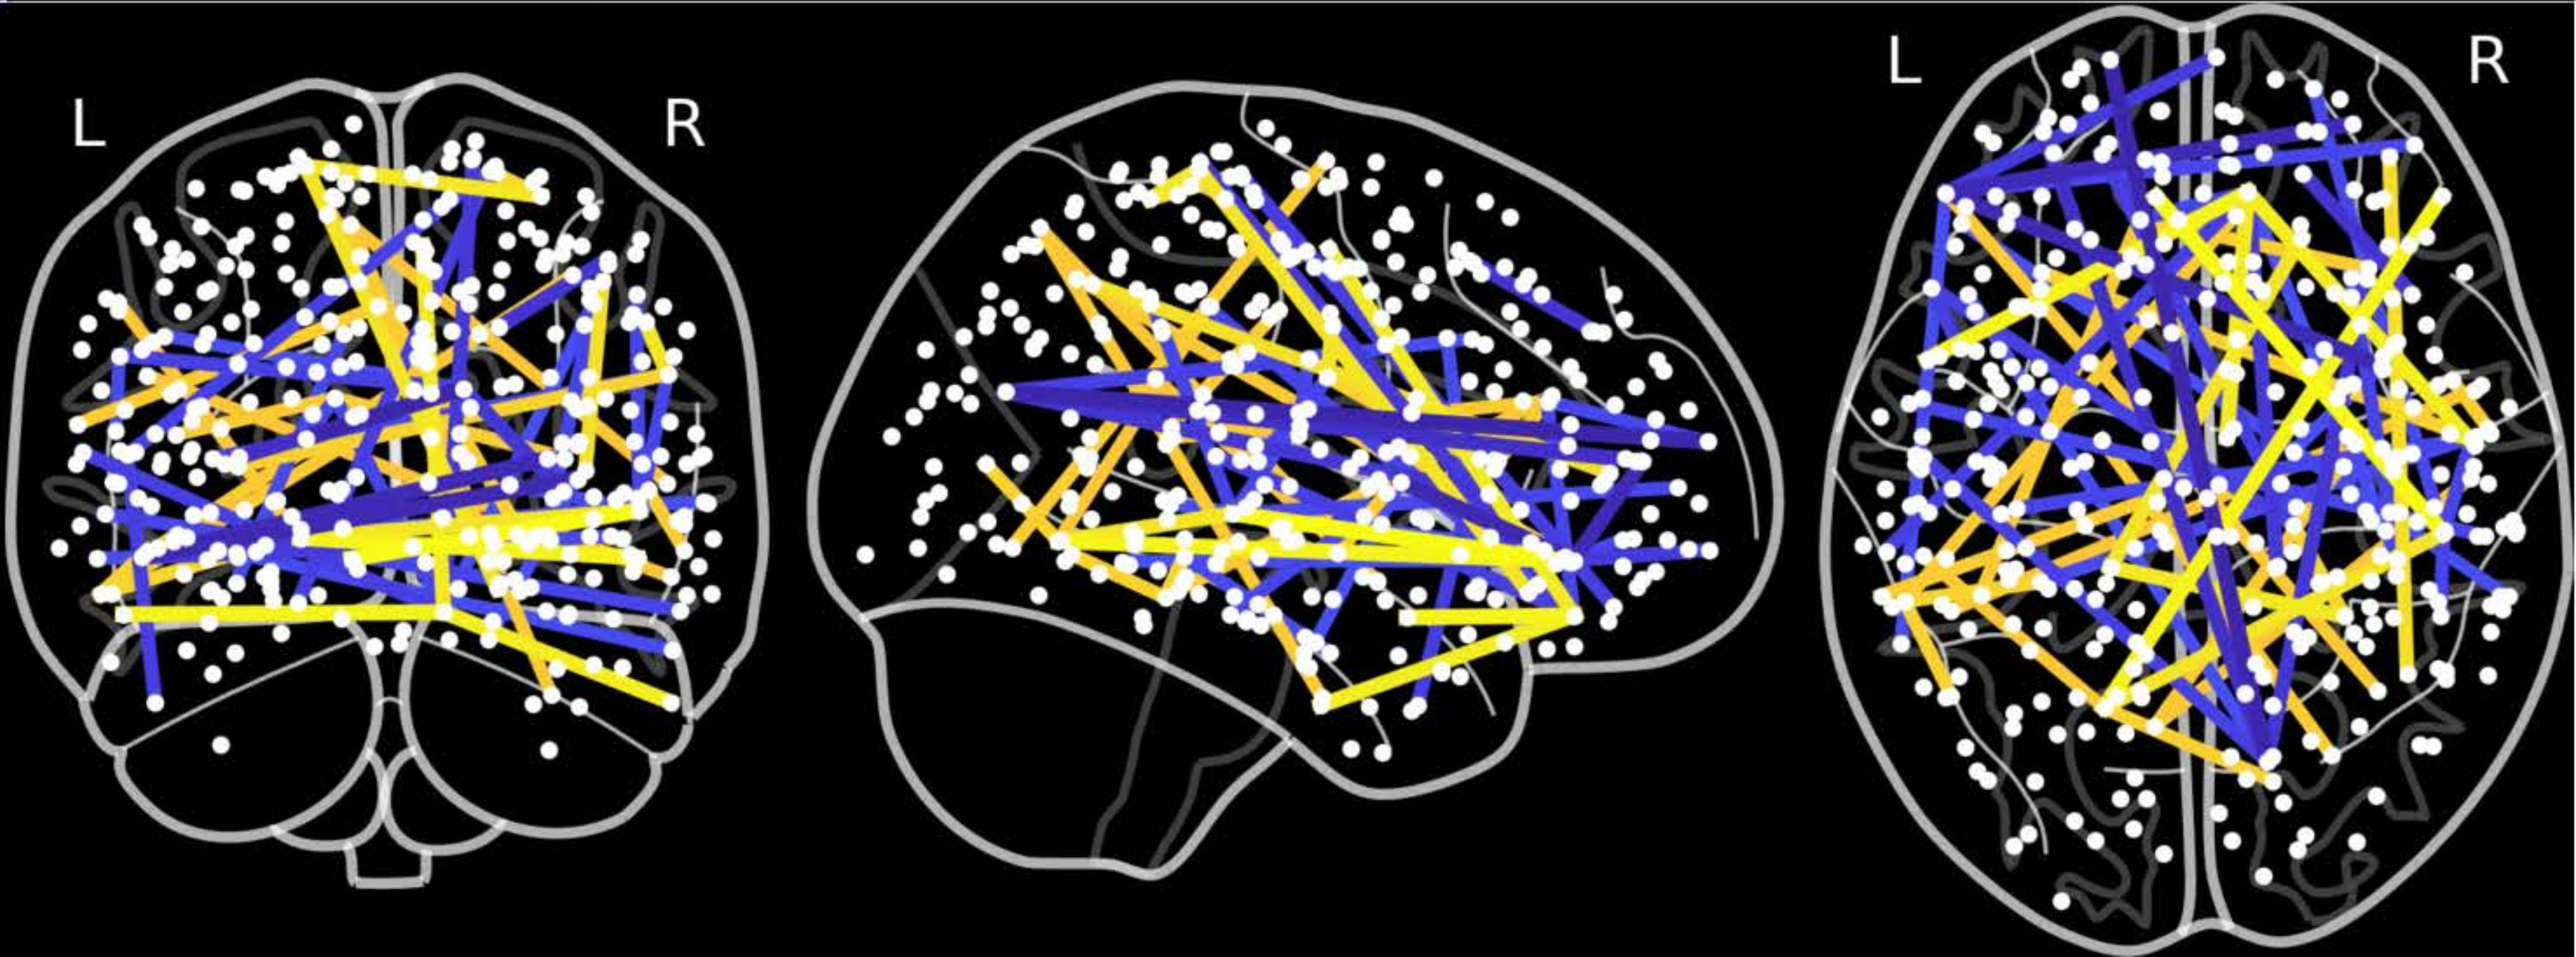



component\_45

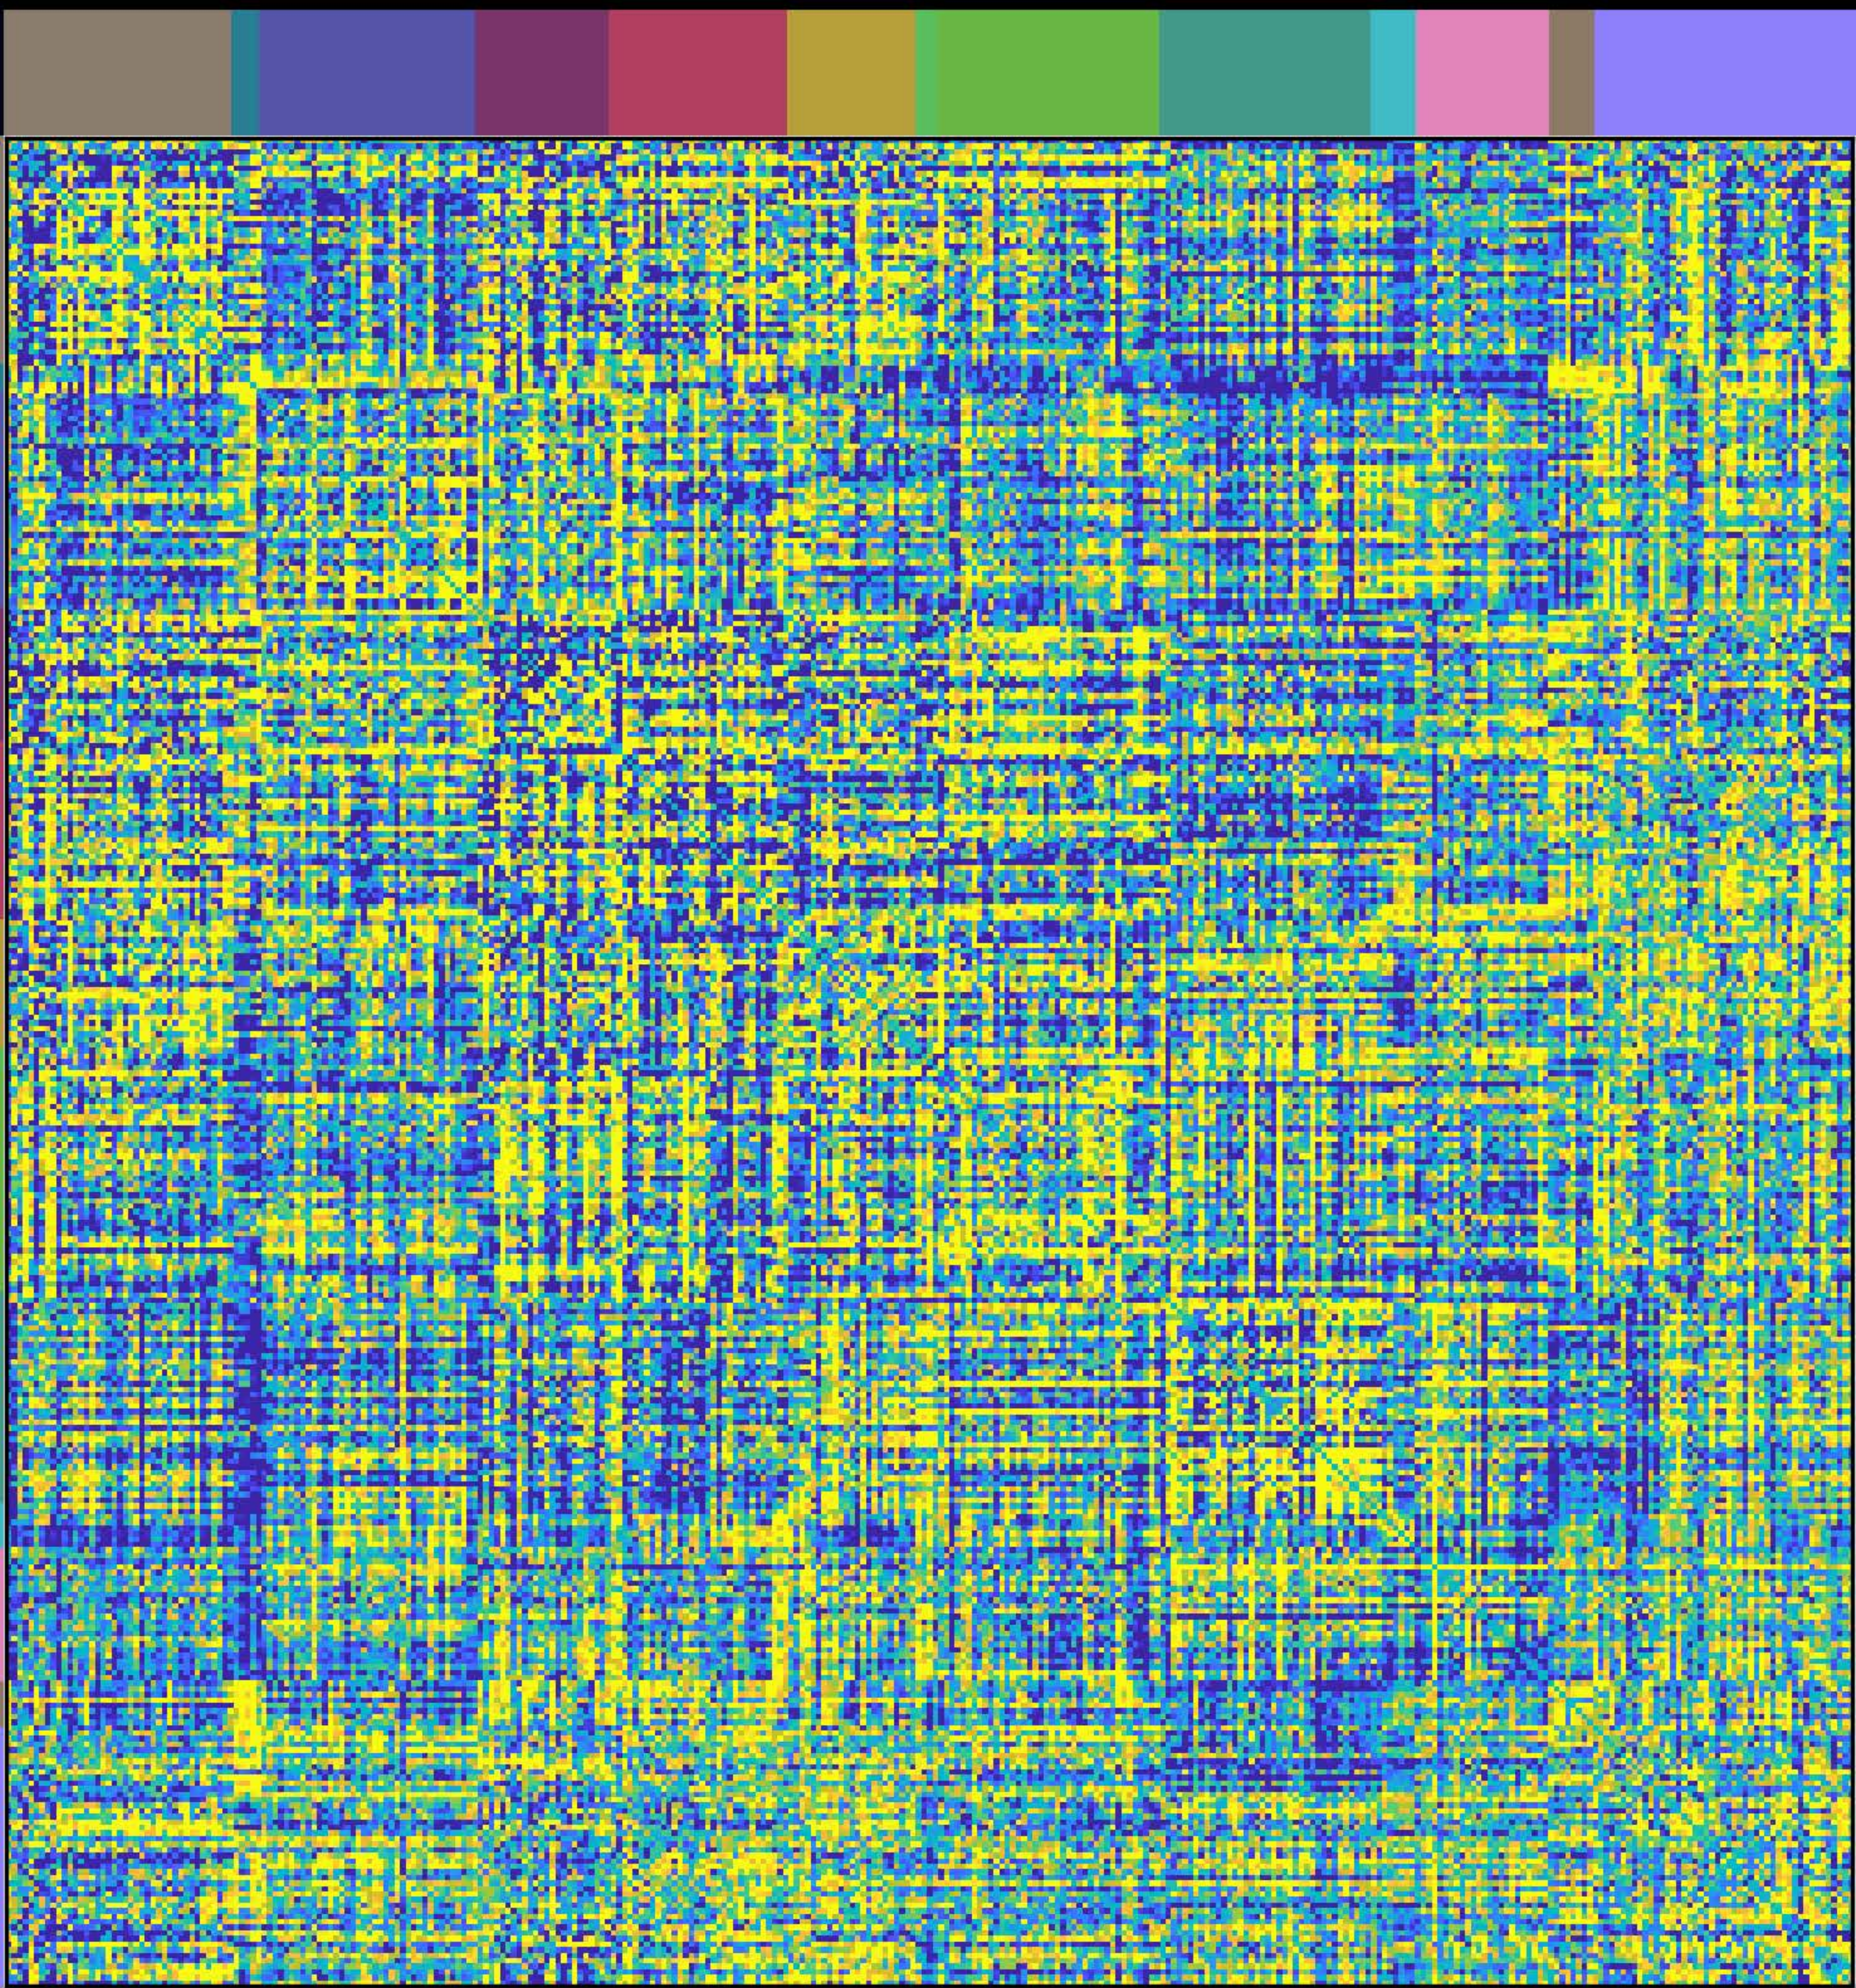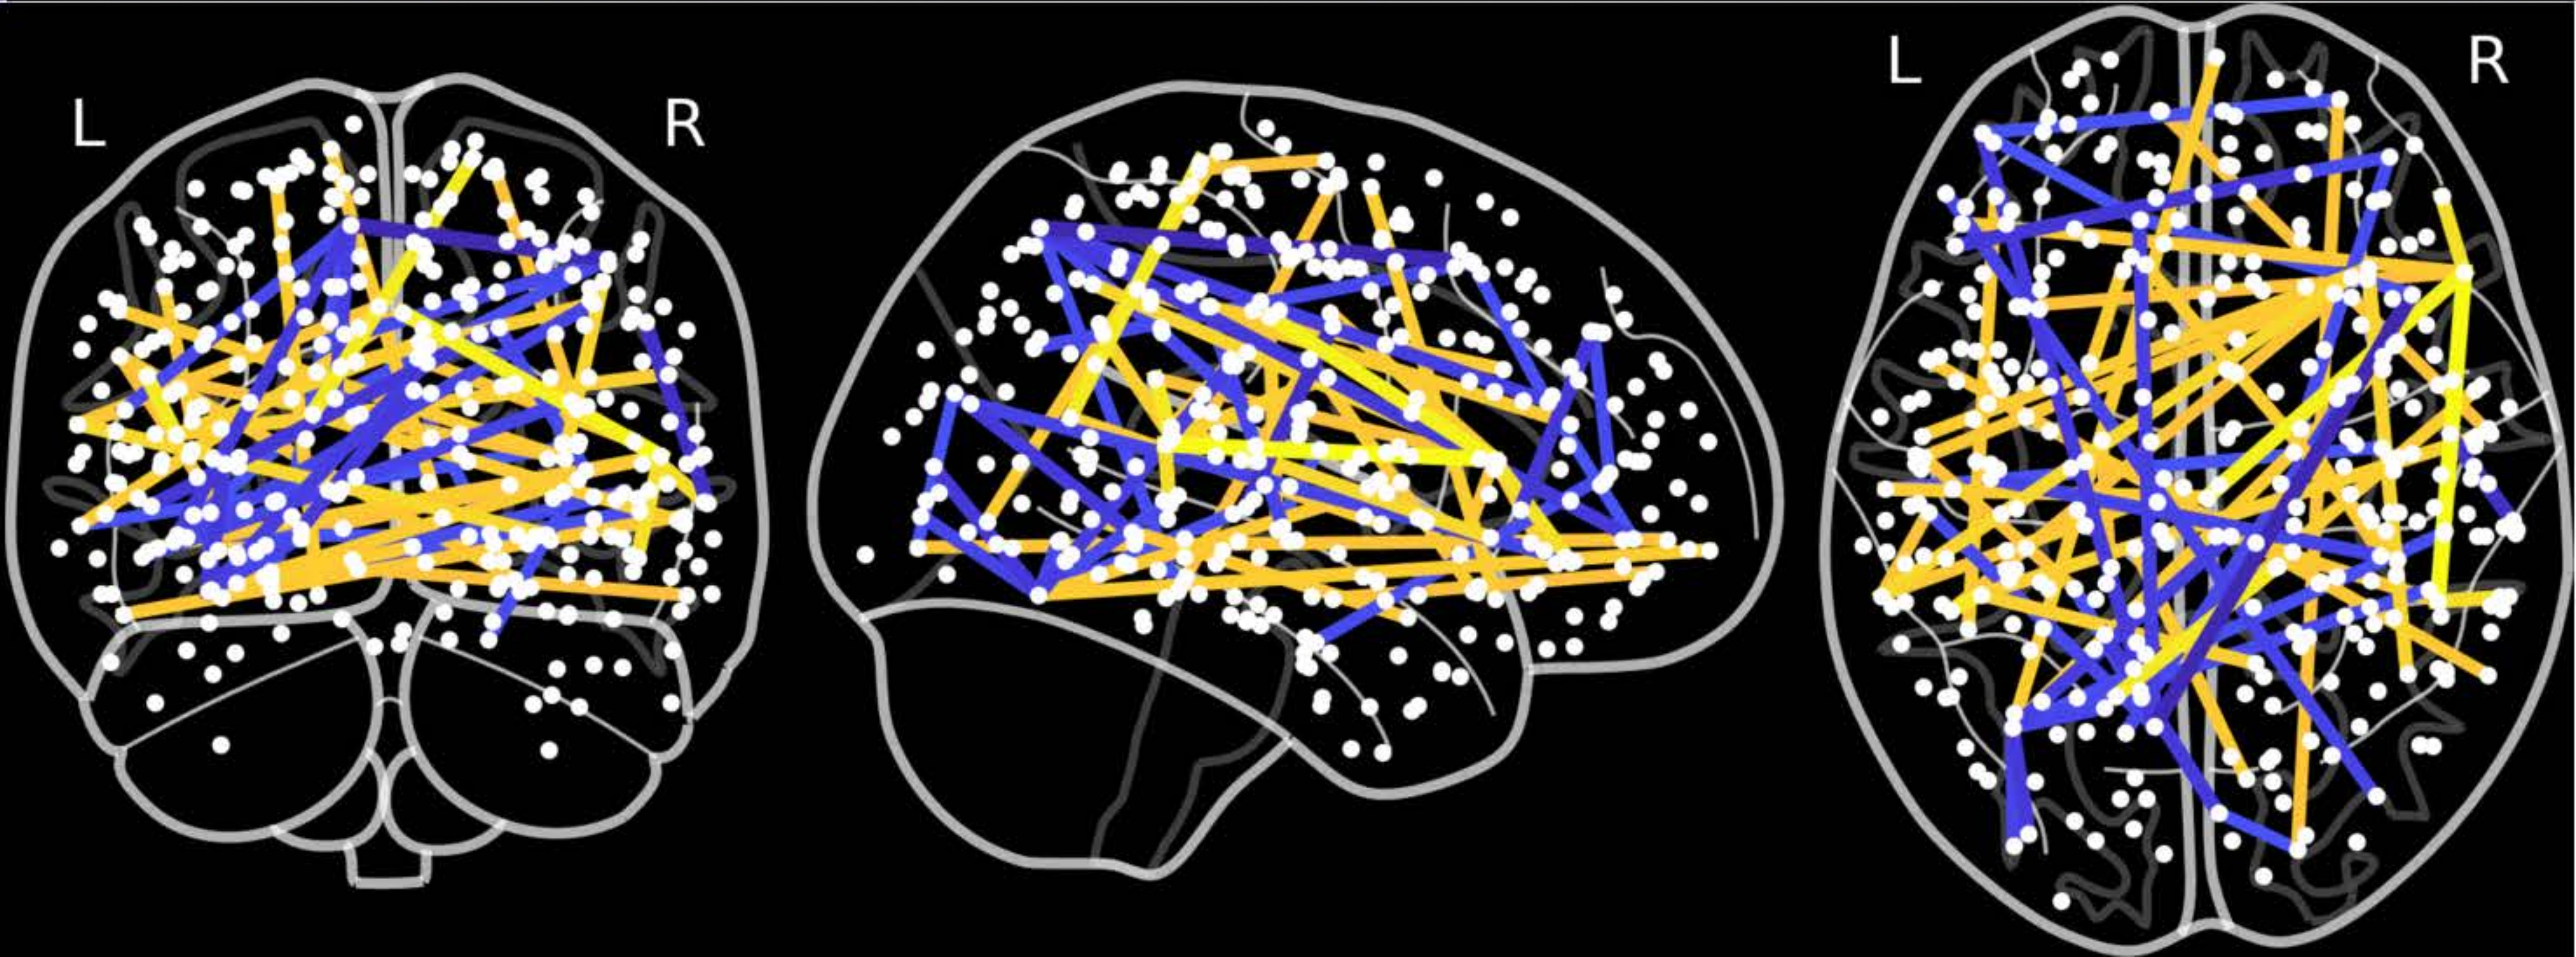



component\_46

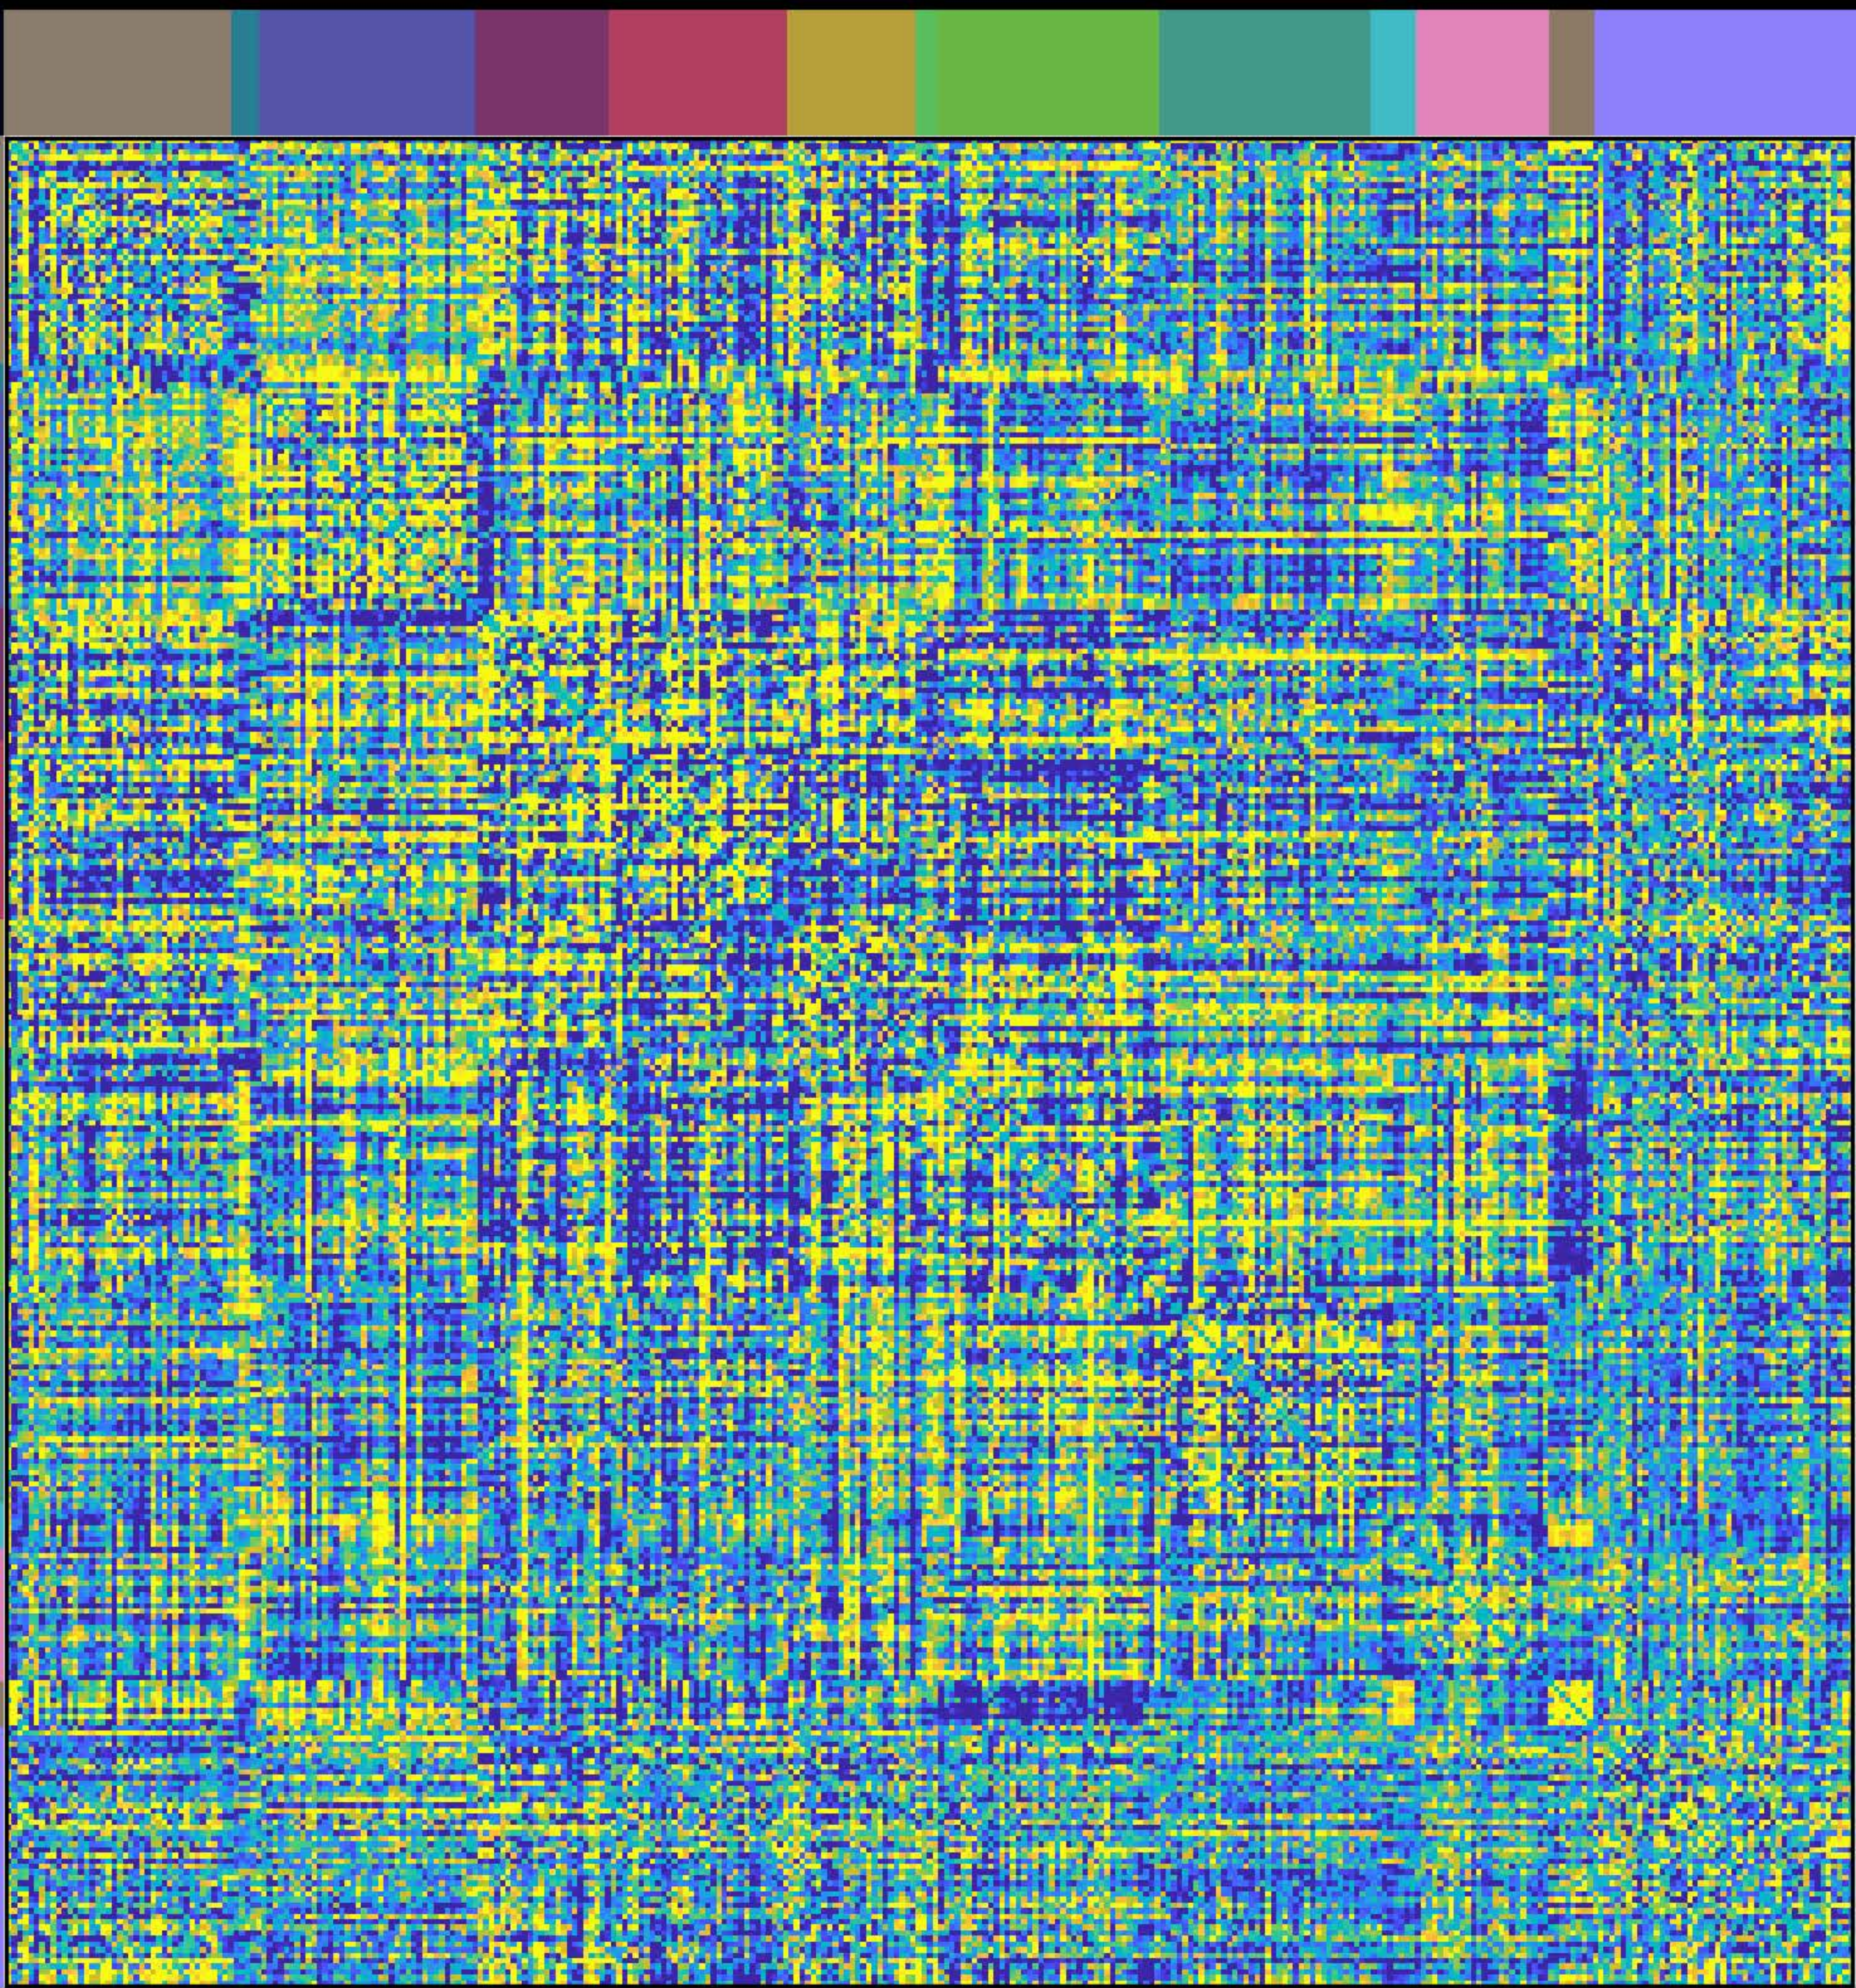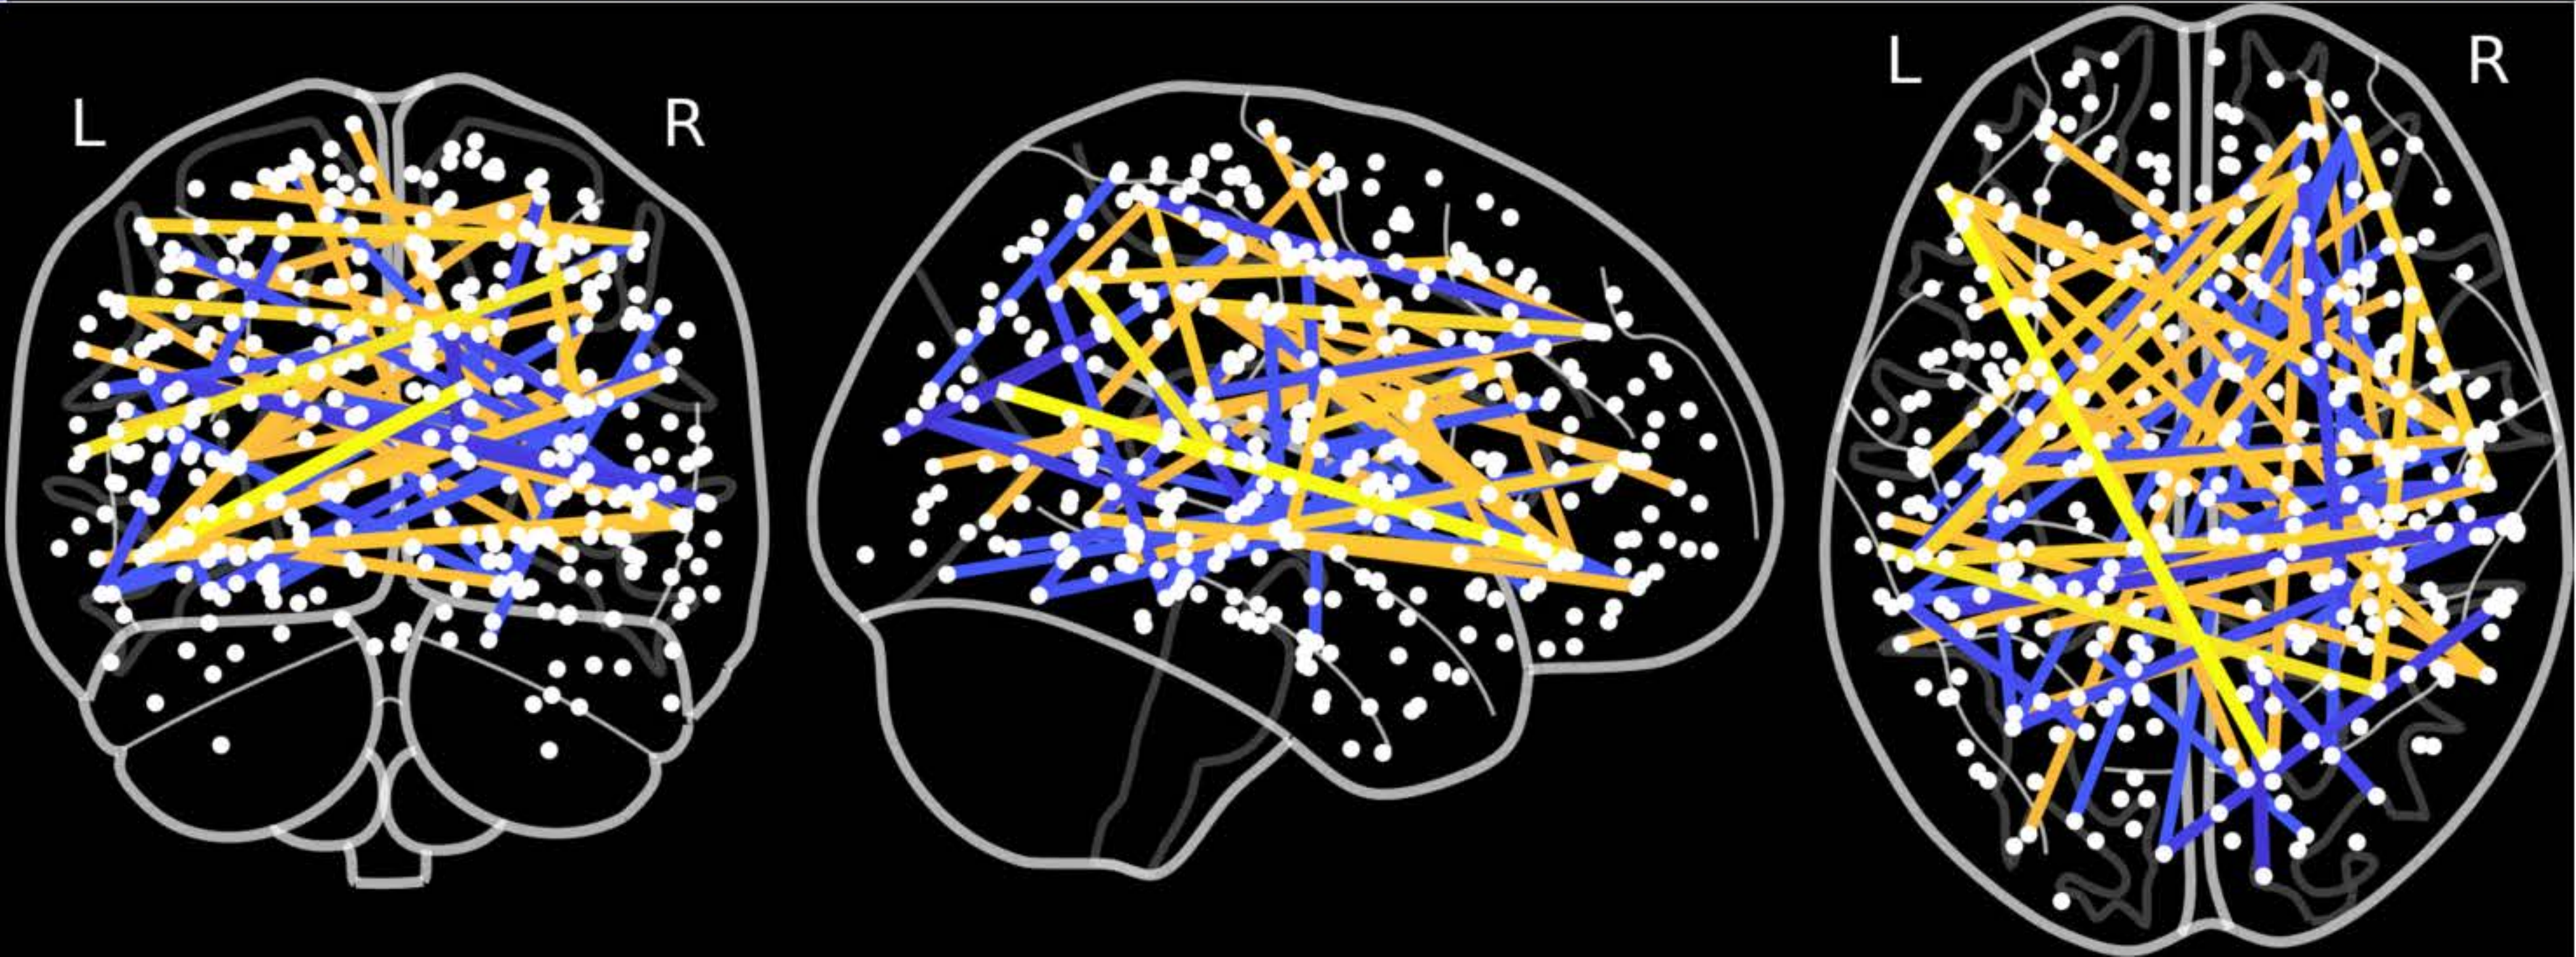



component\_47

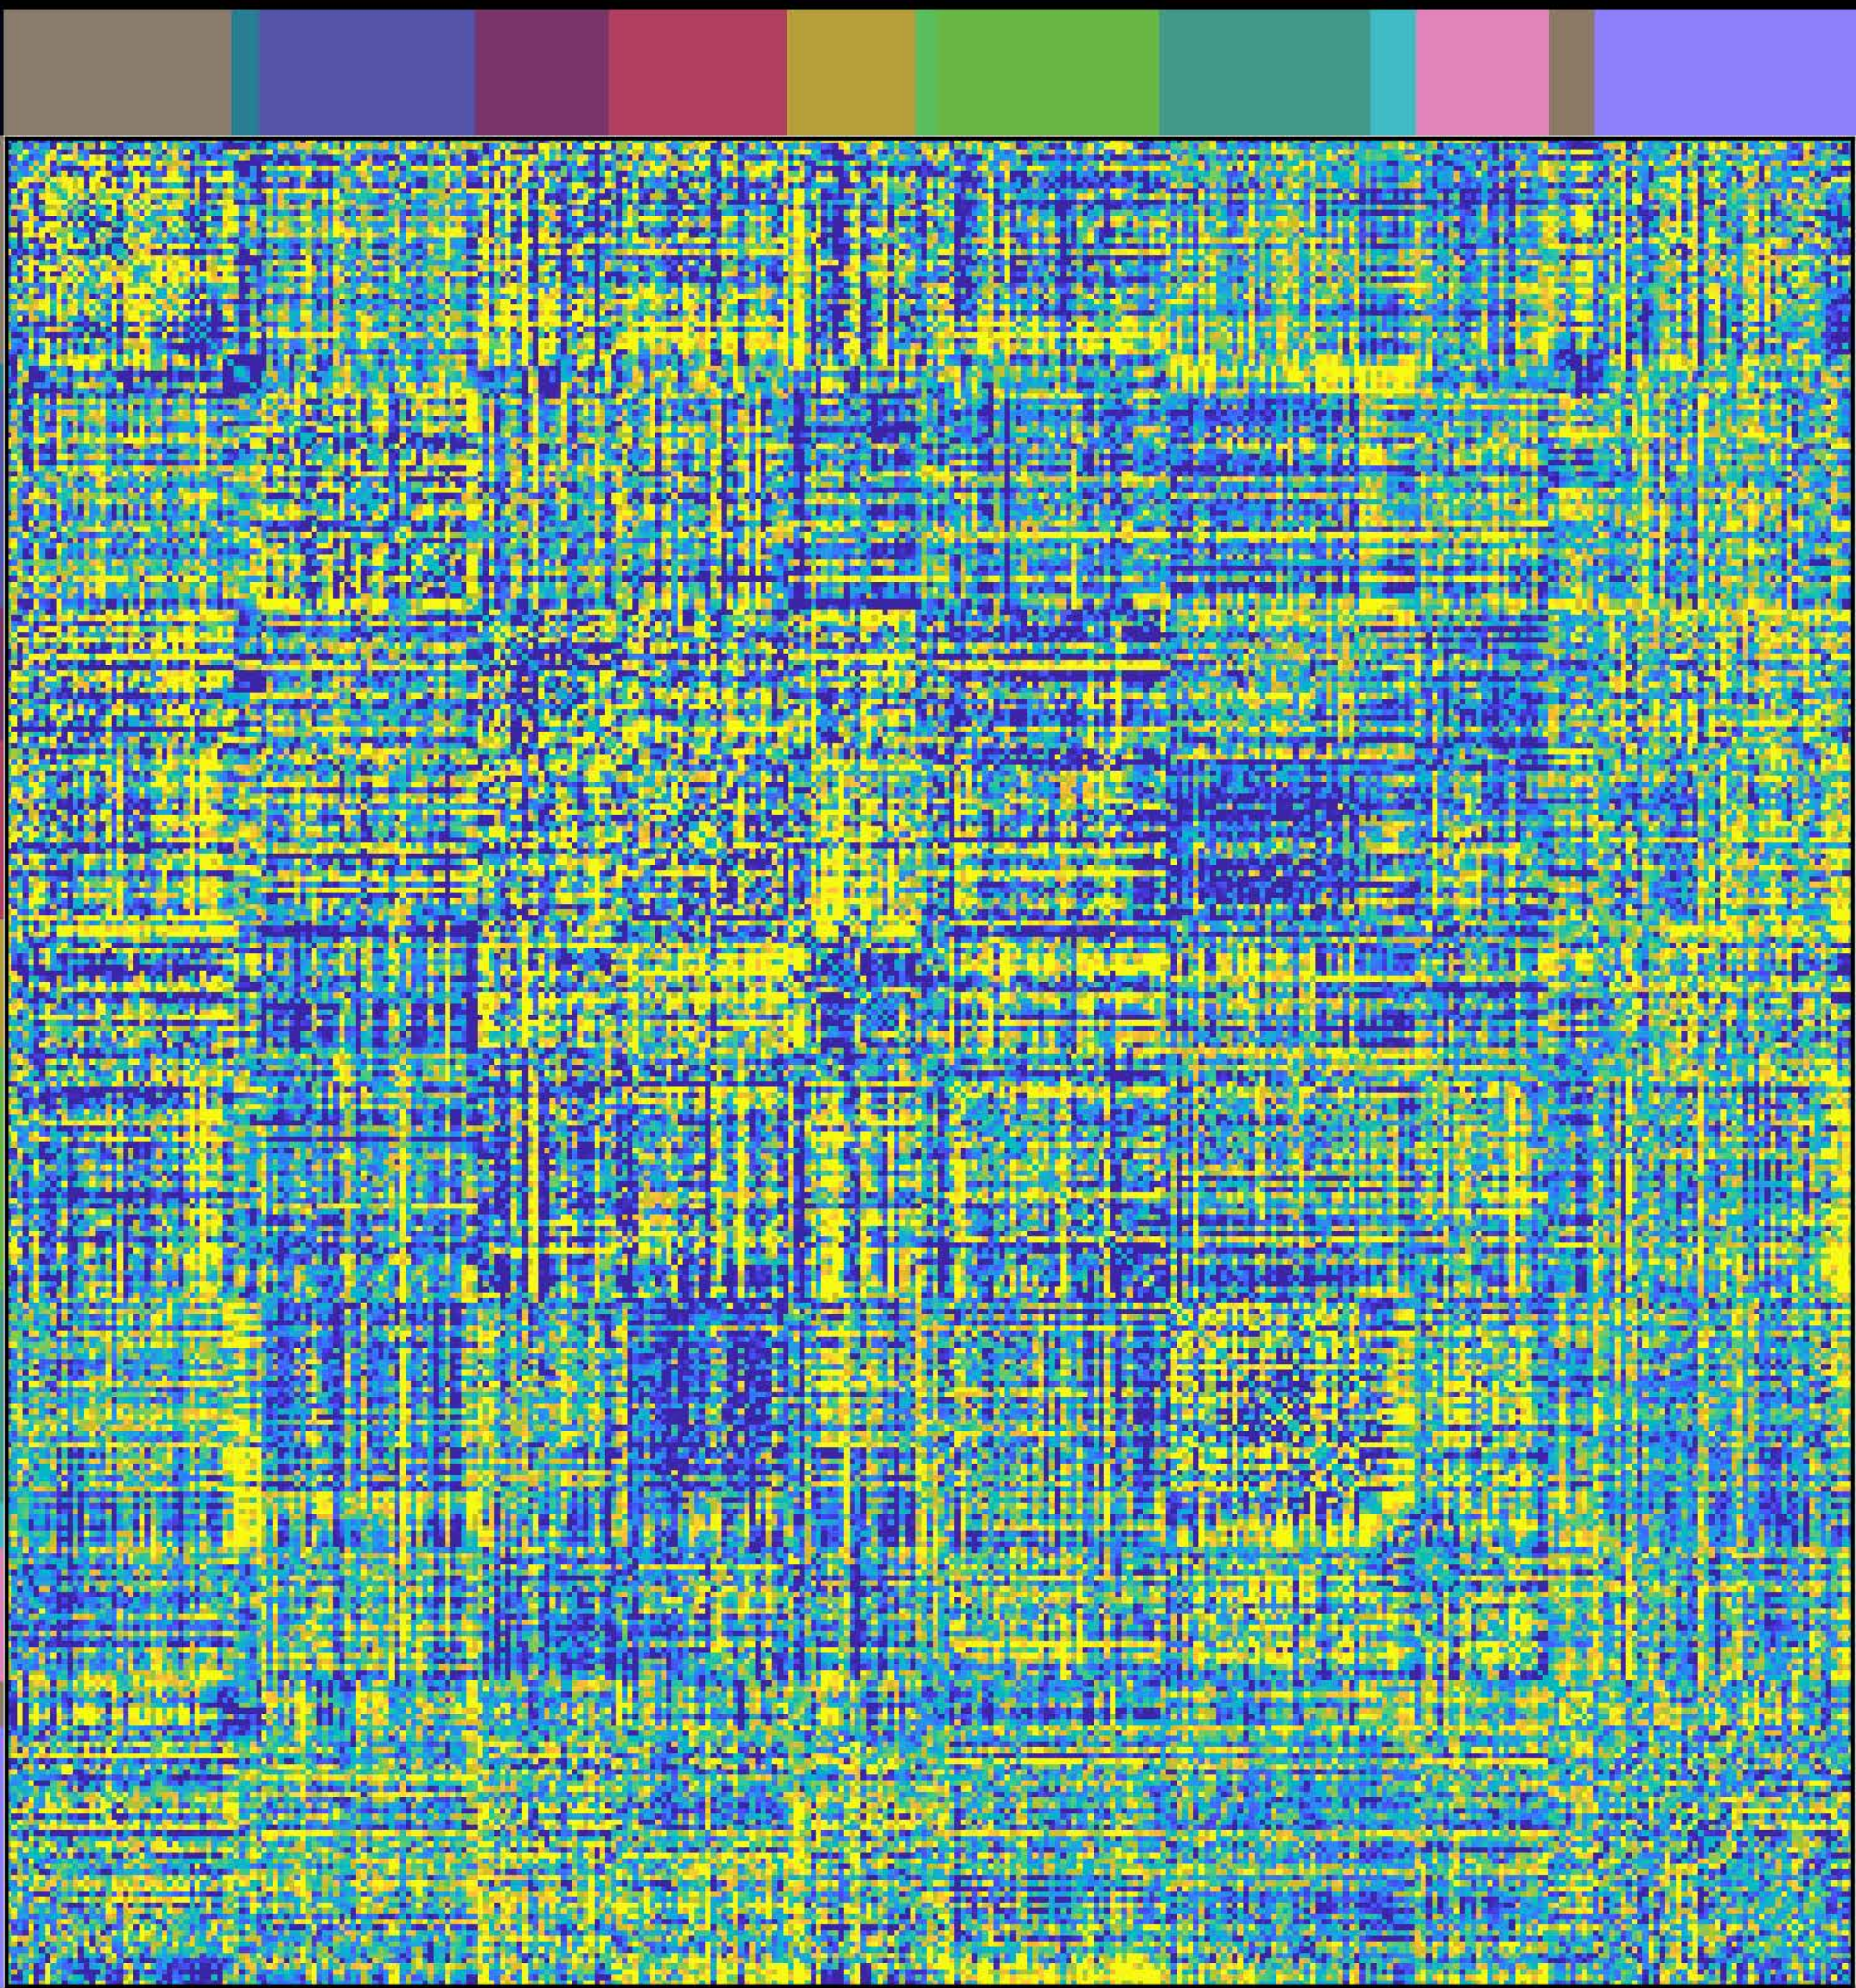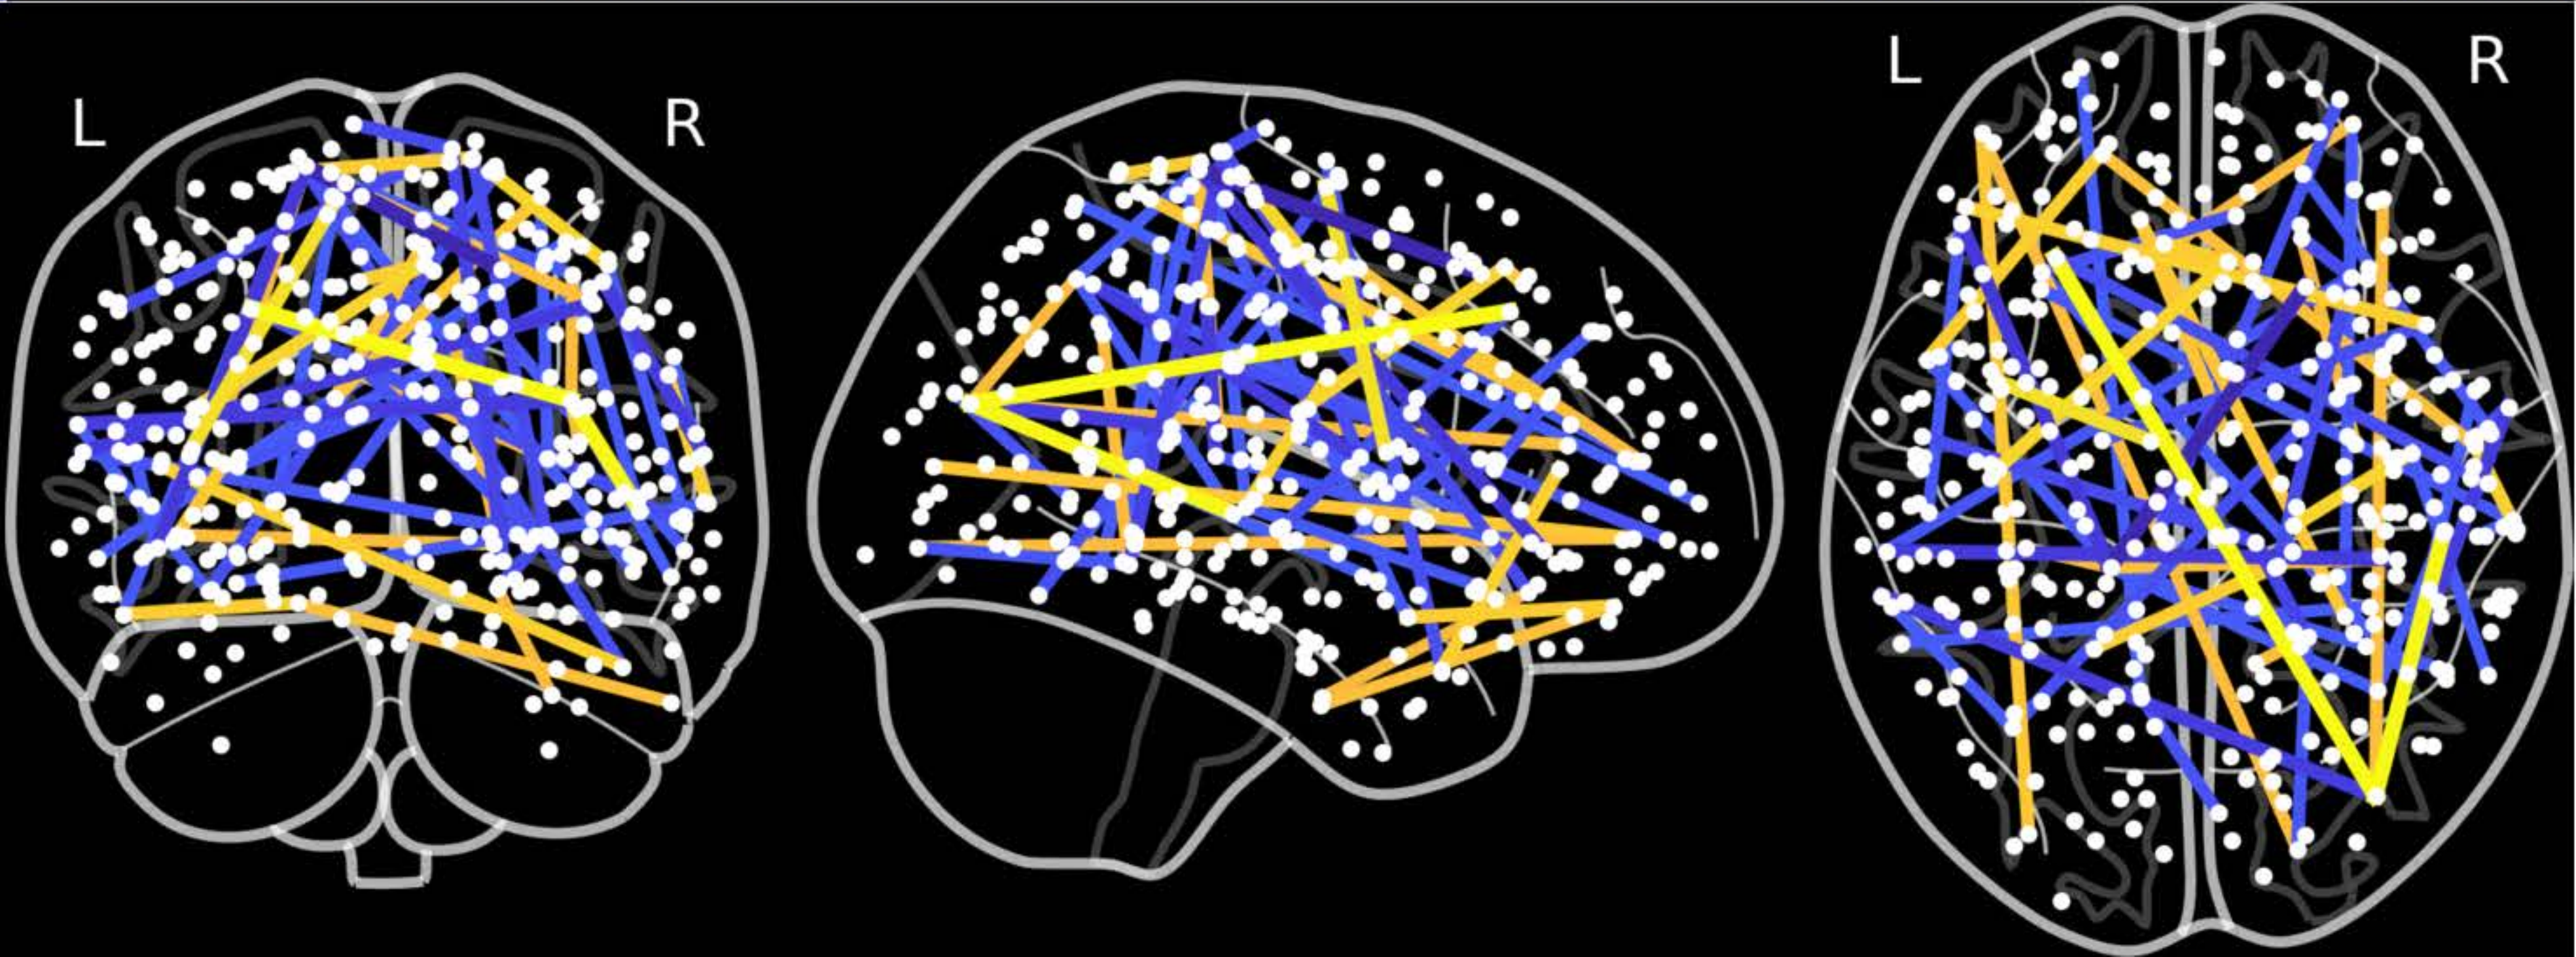



component\_48

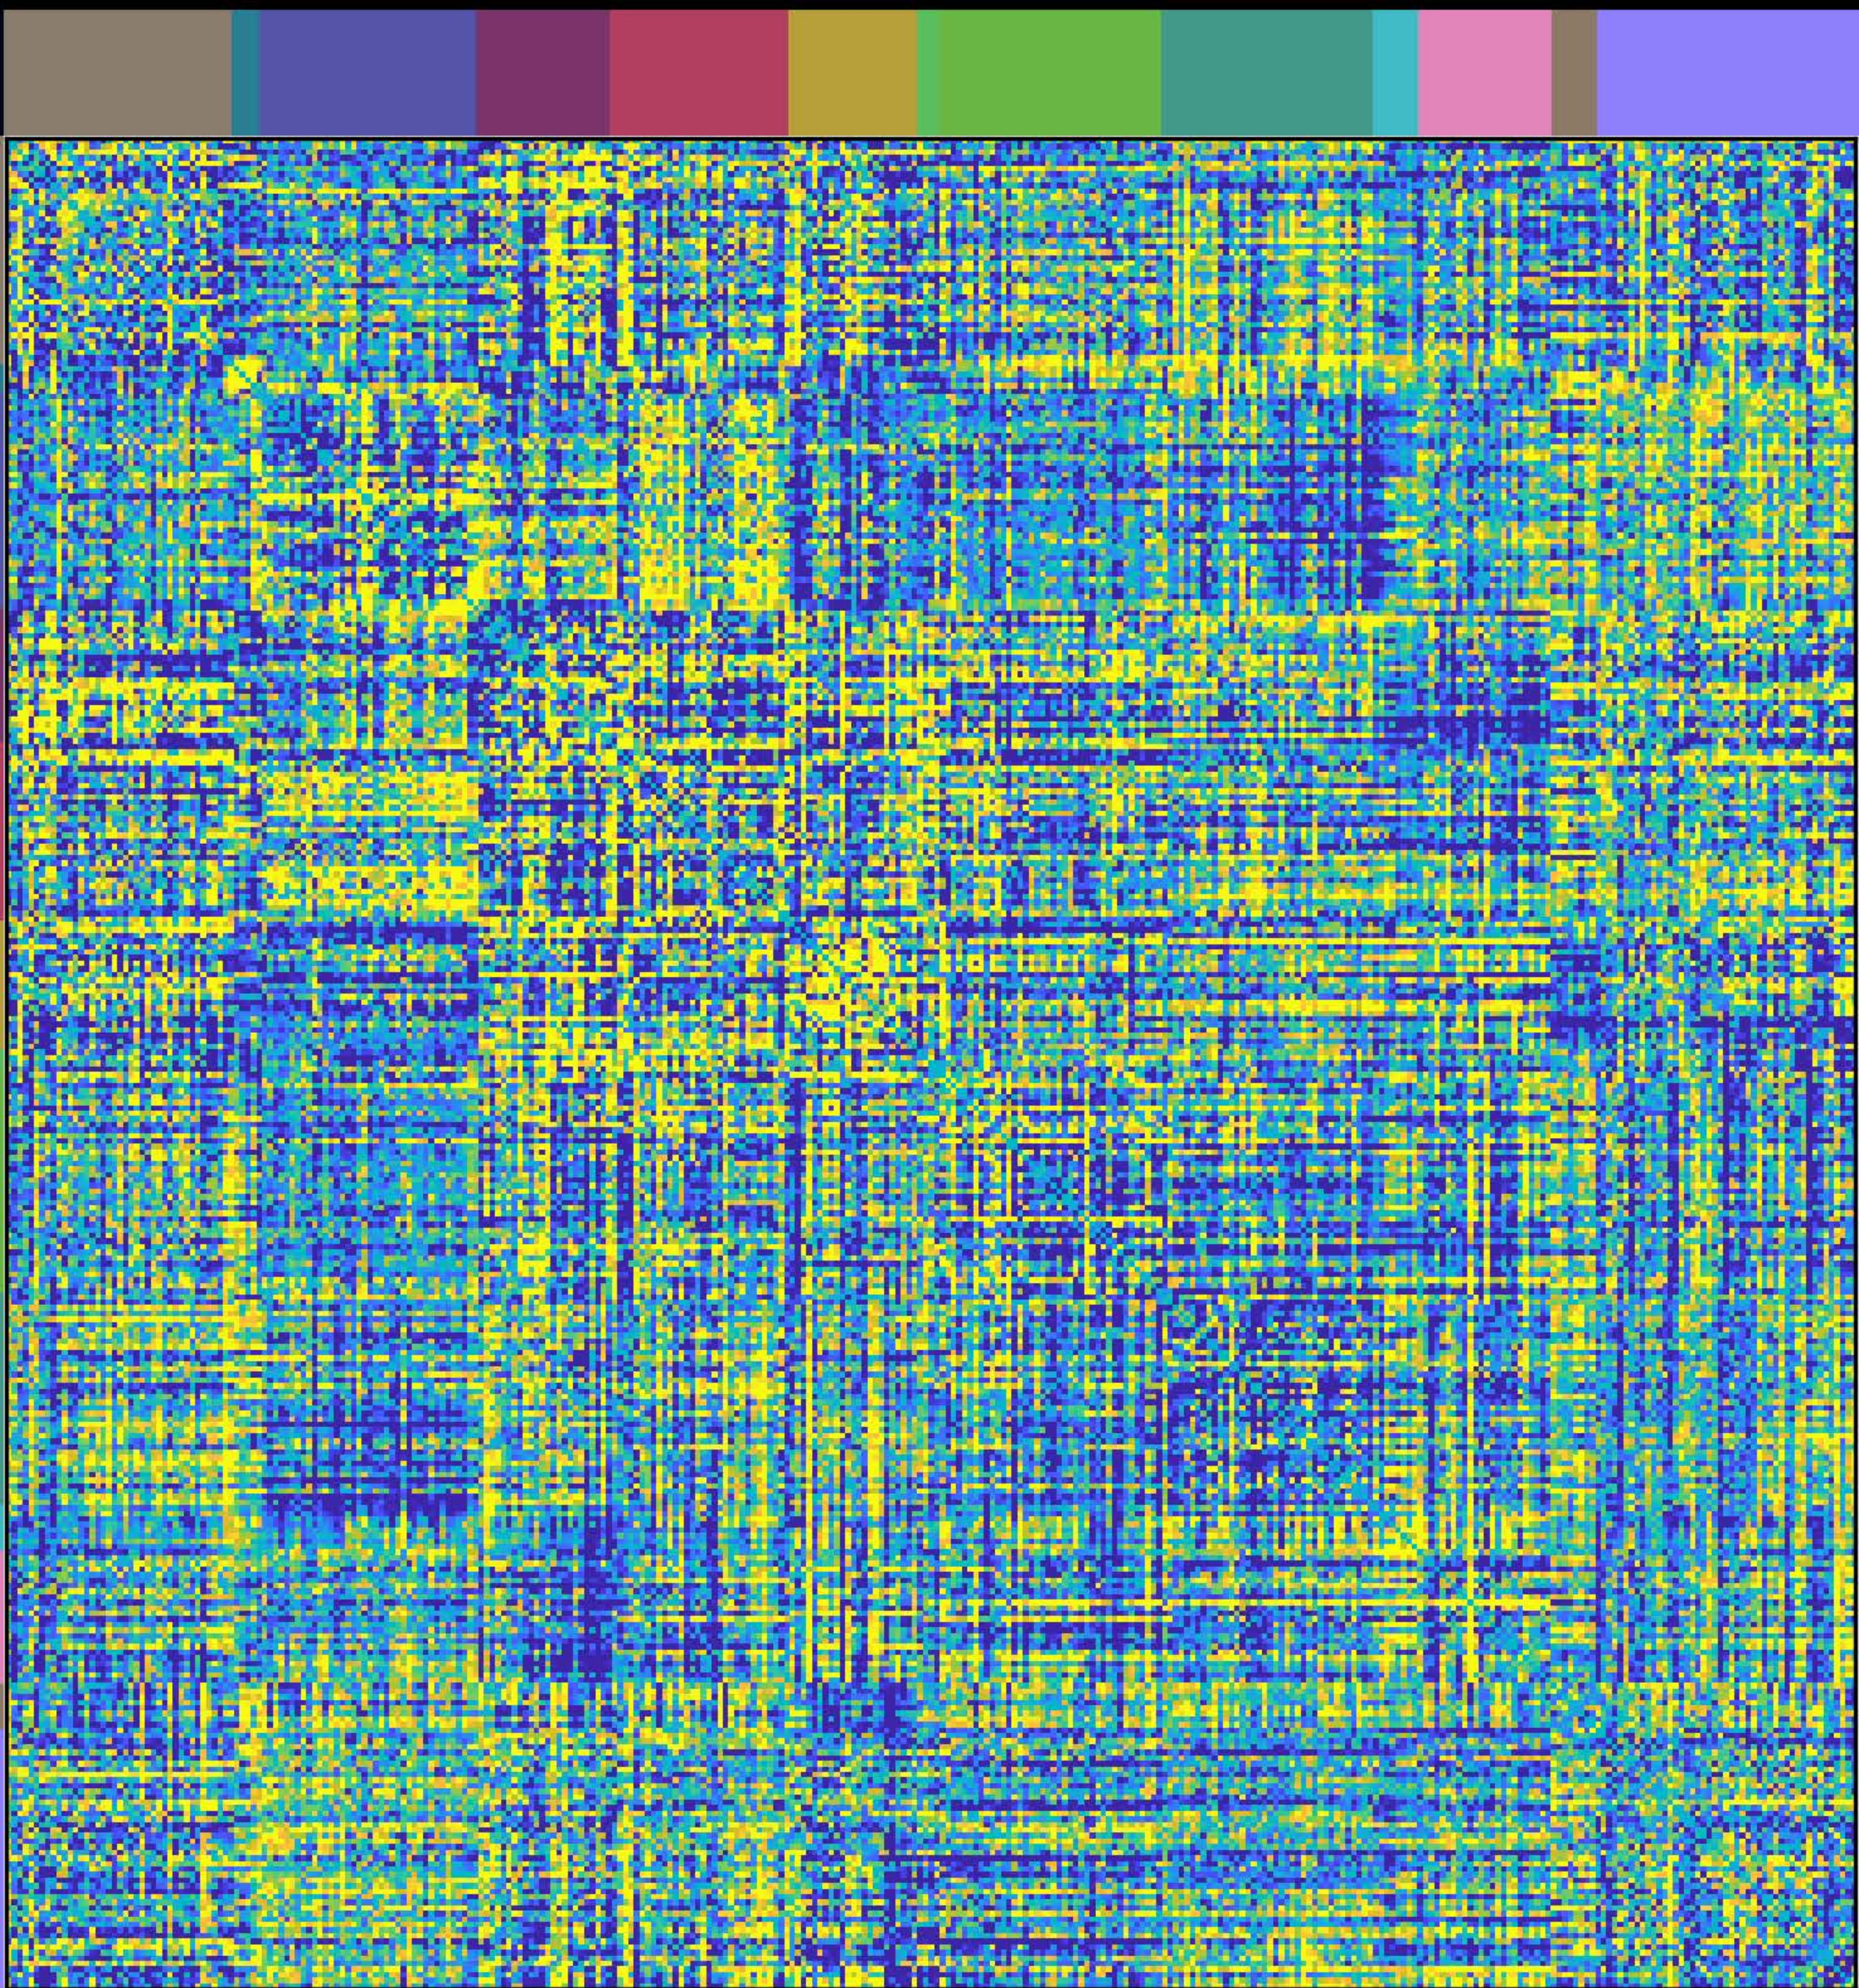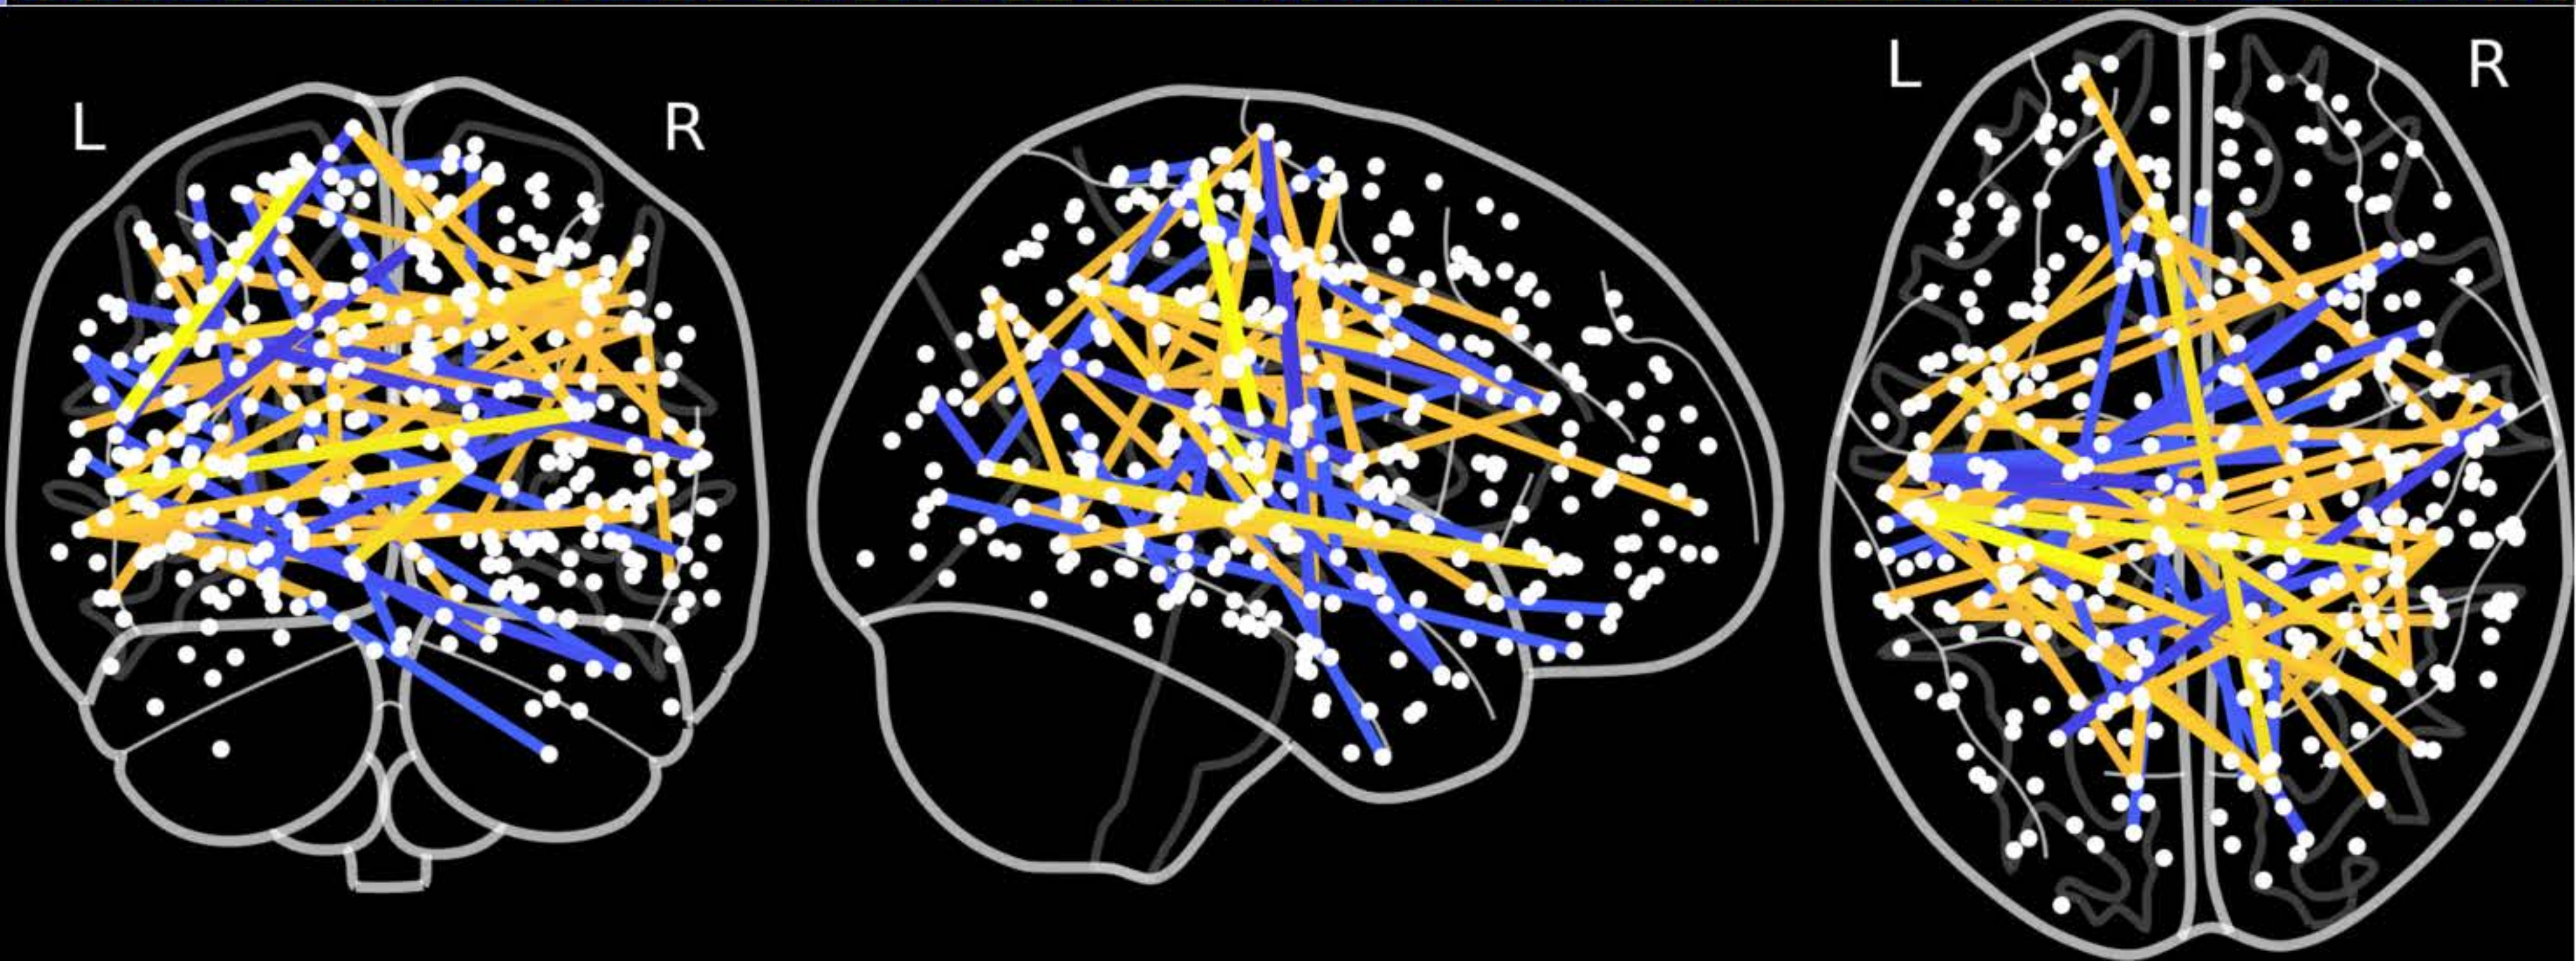



component\_49

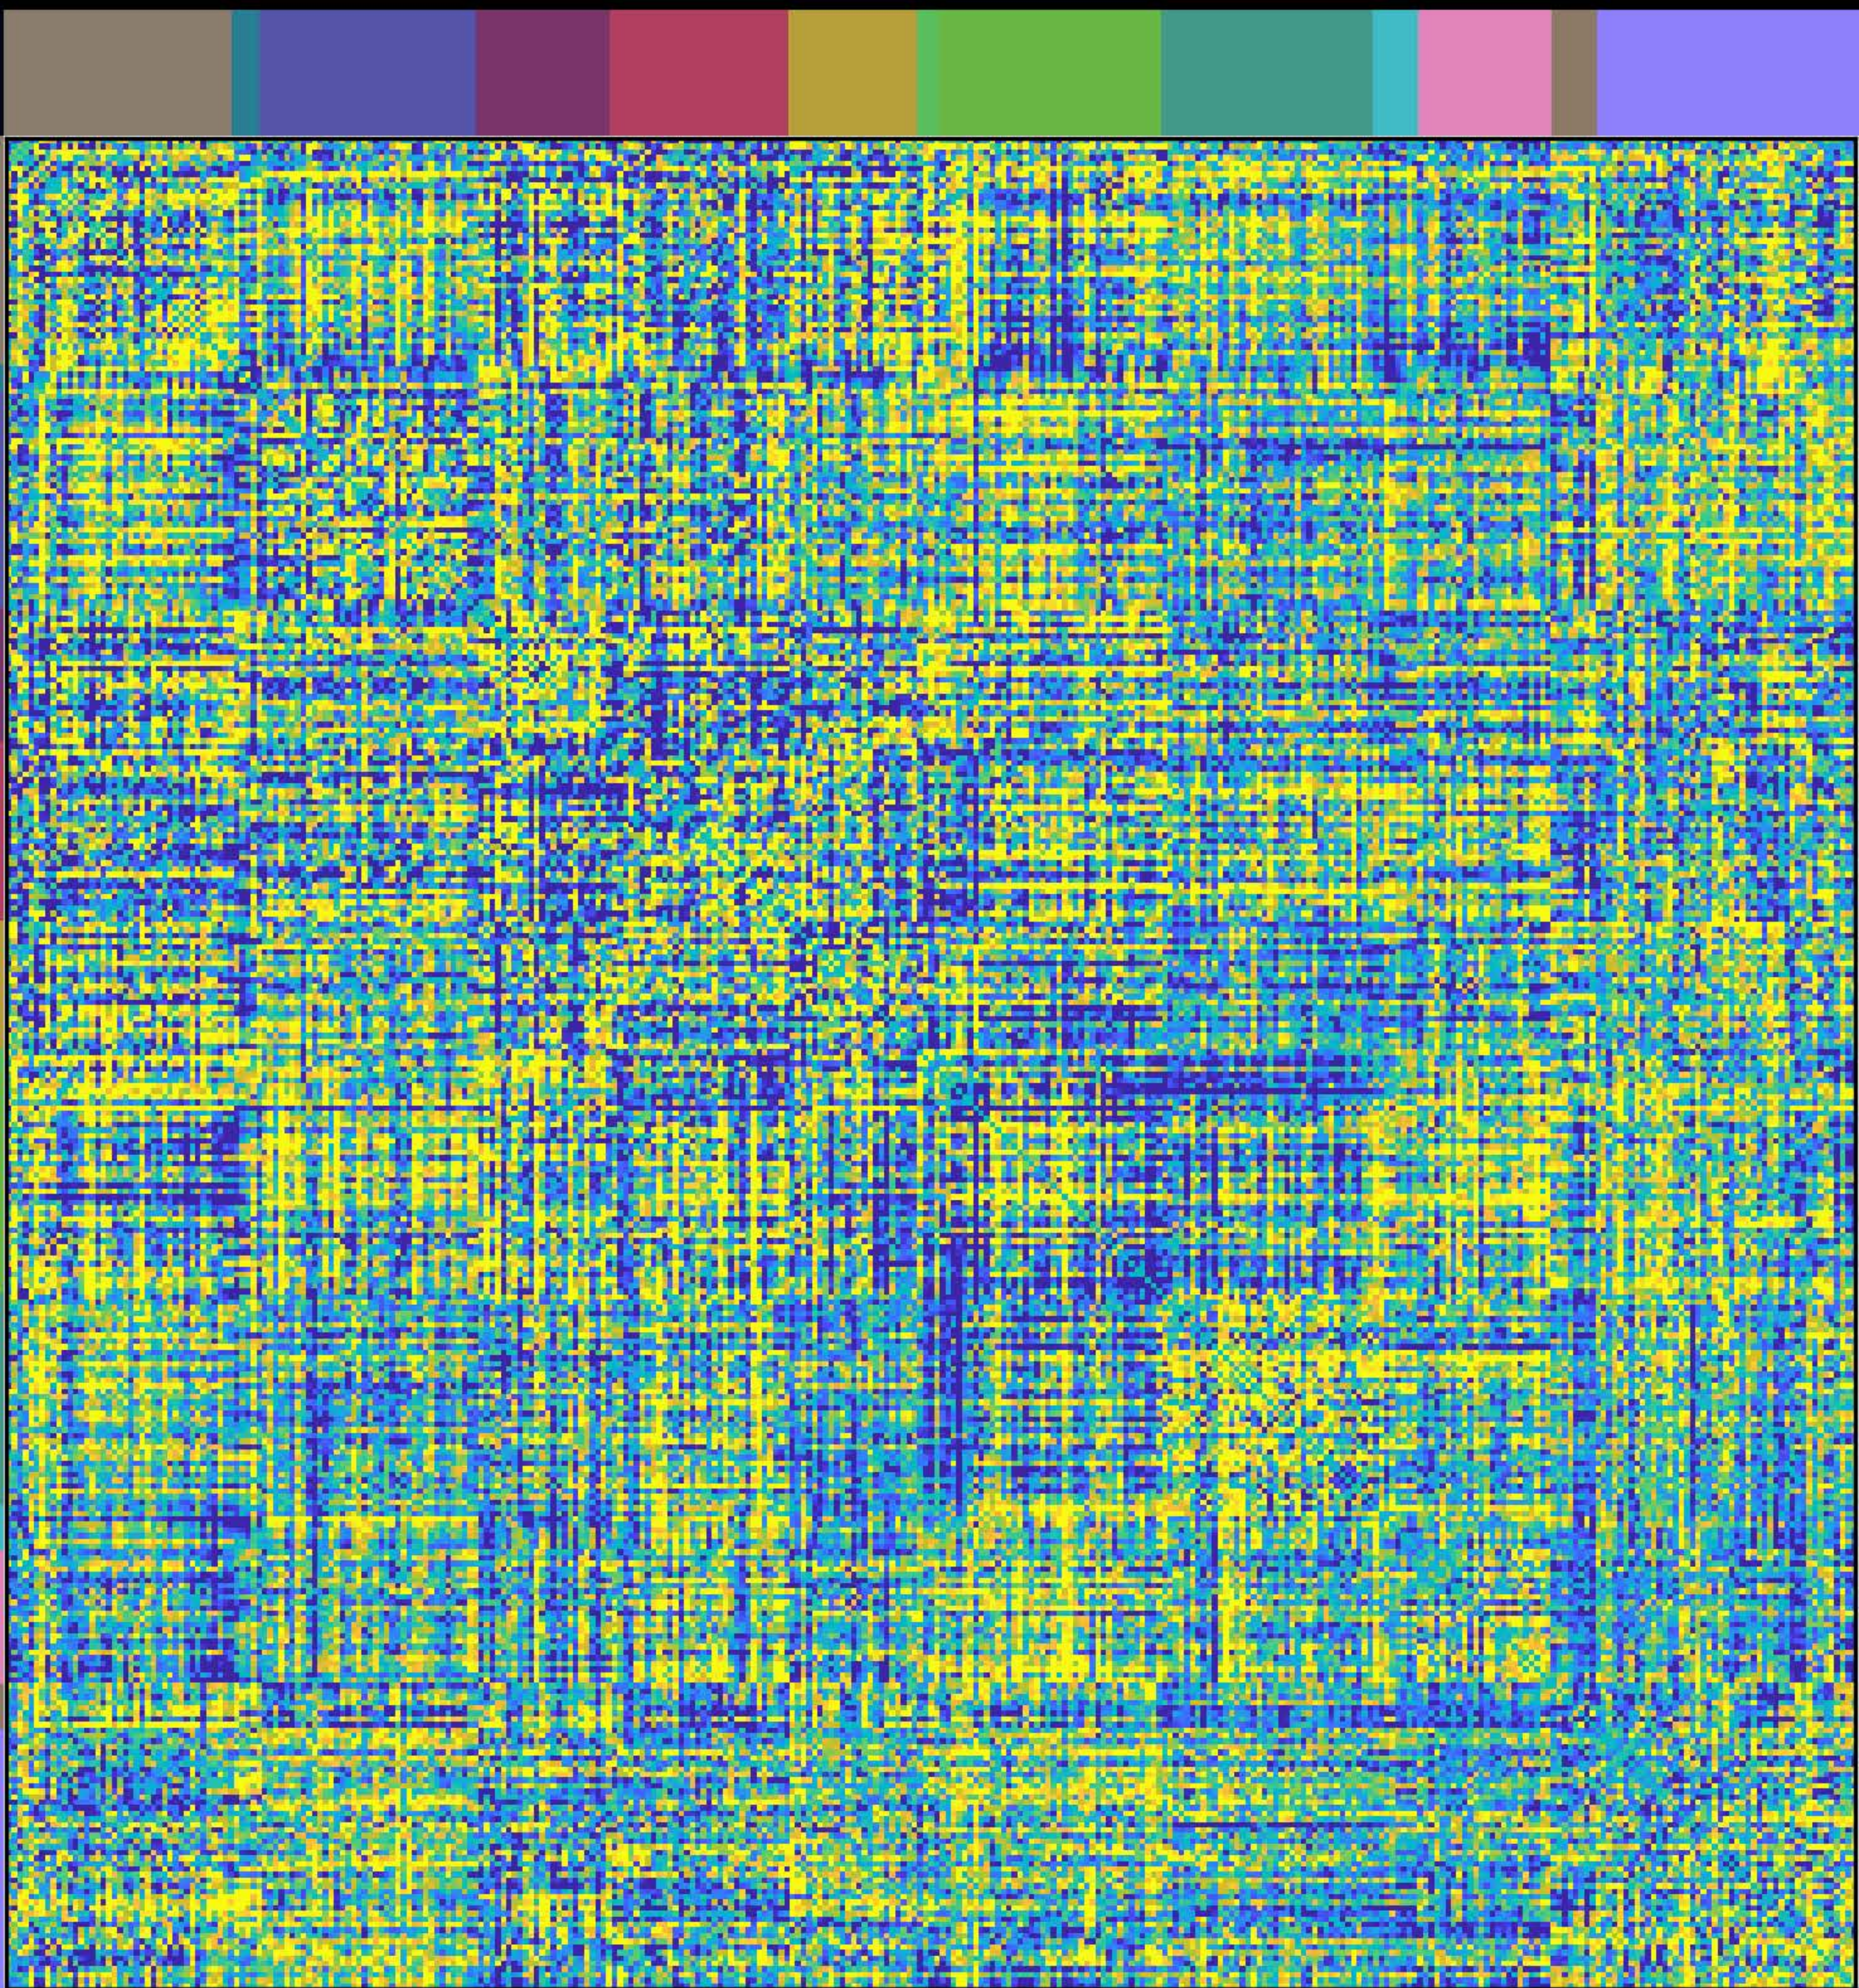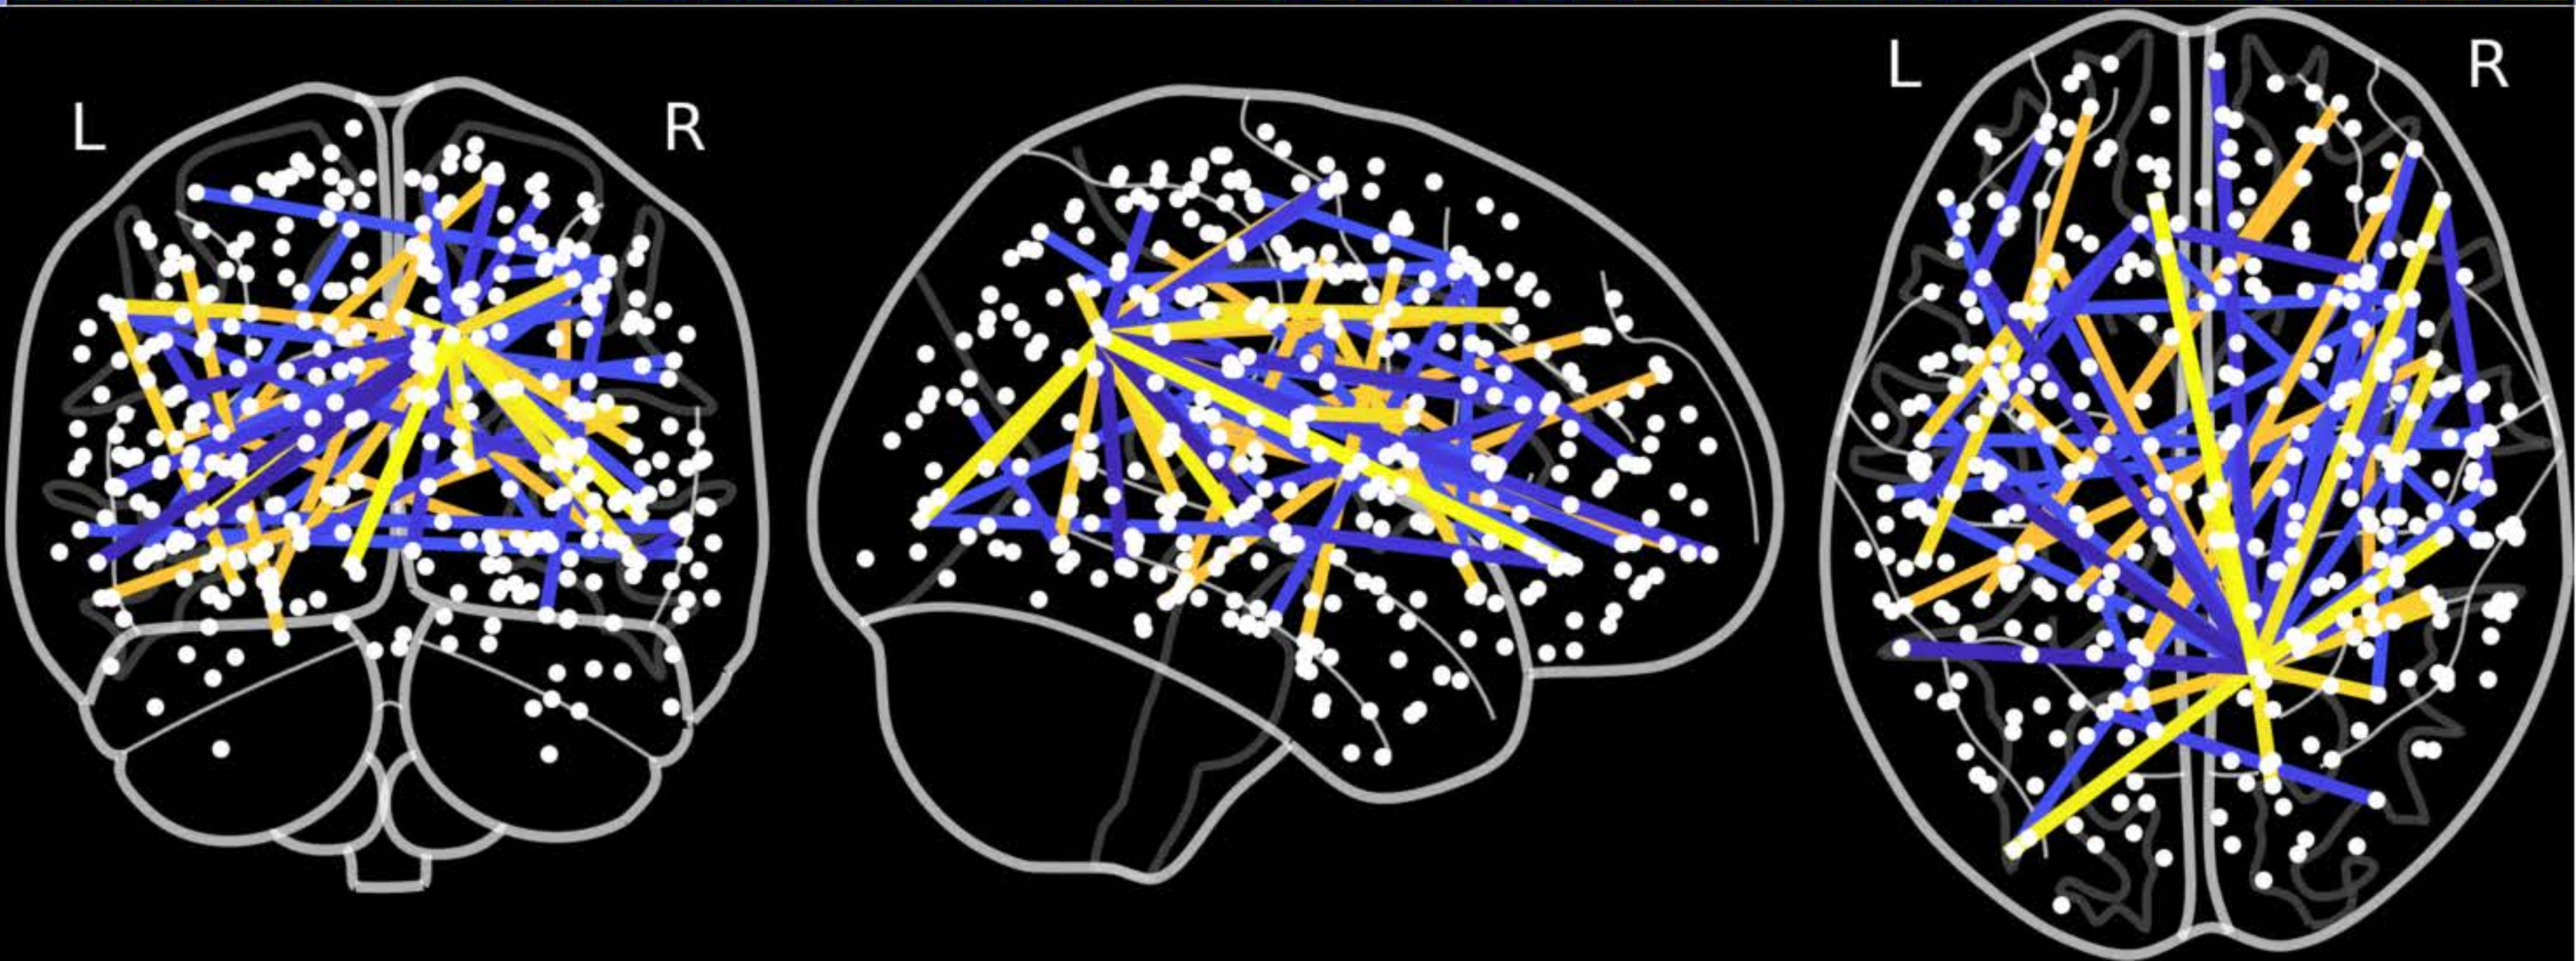



component\_50

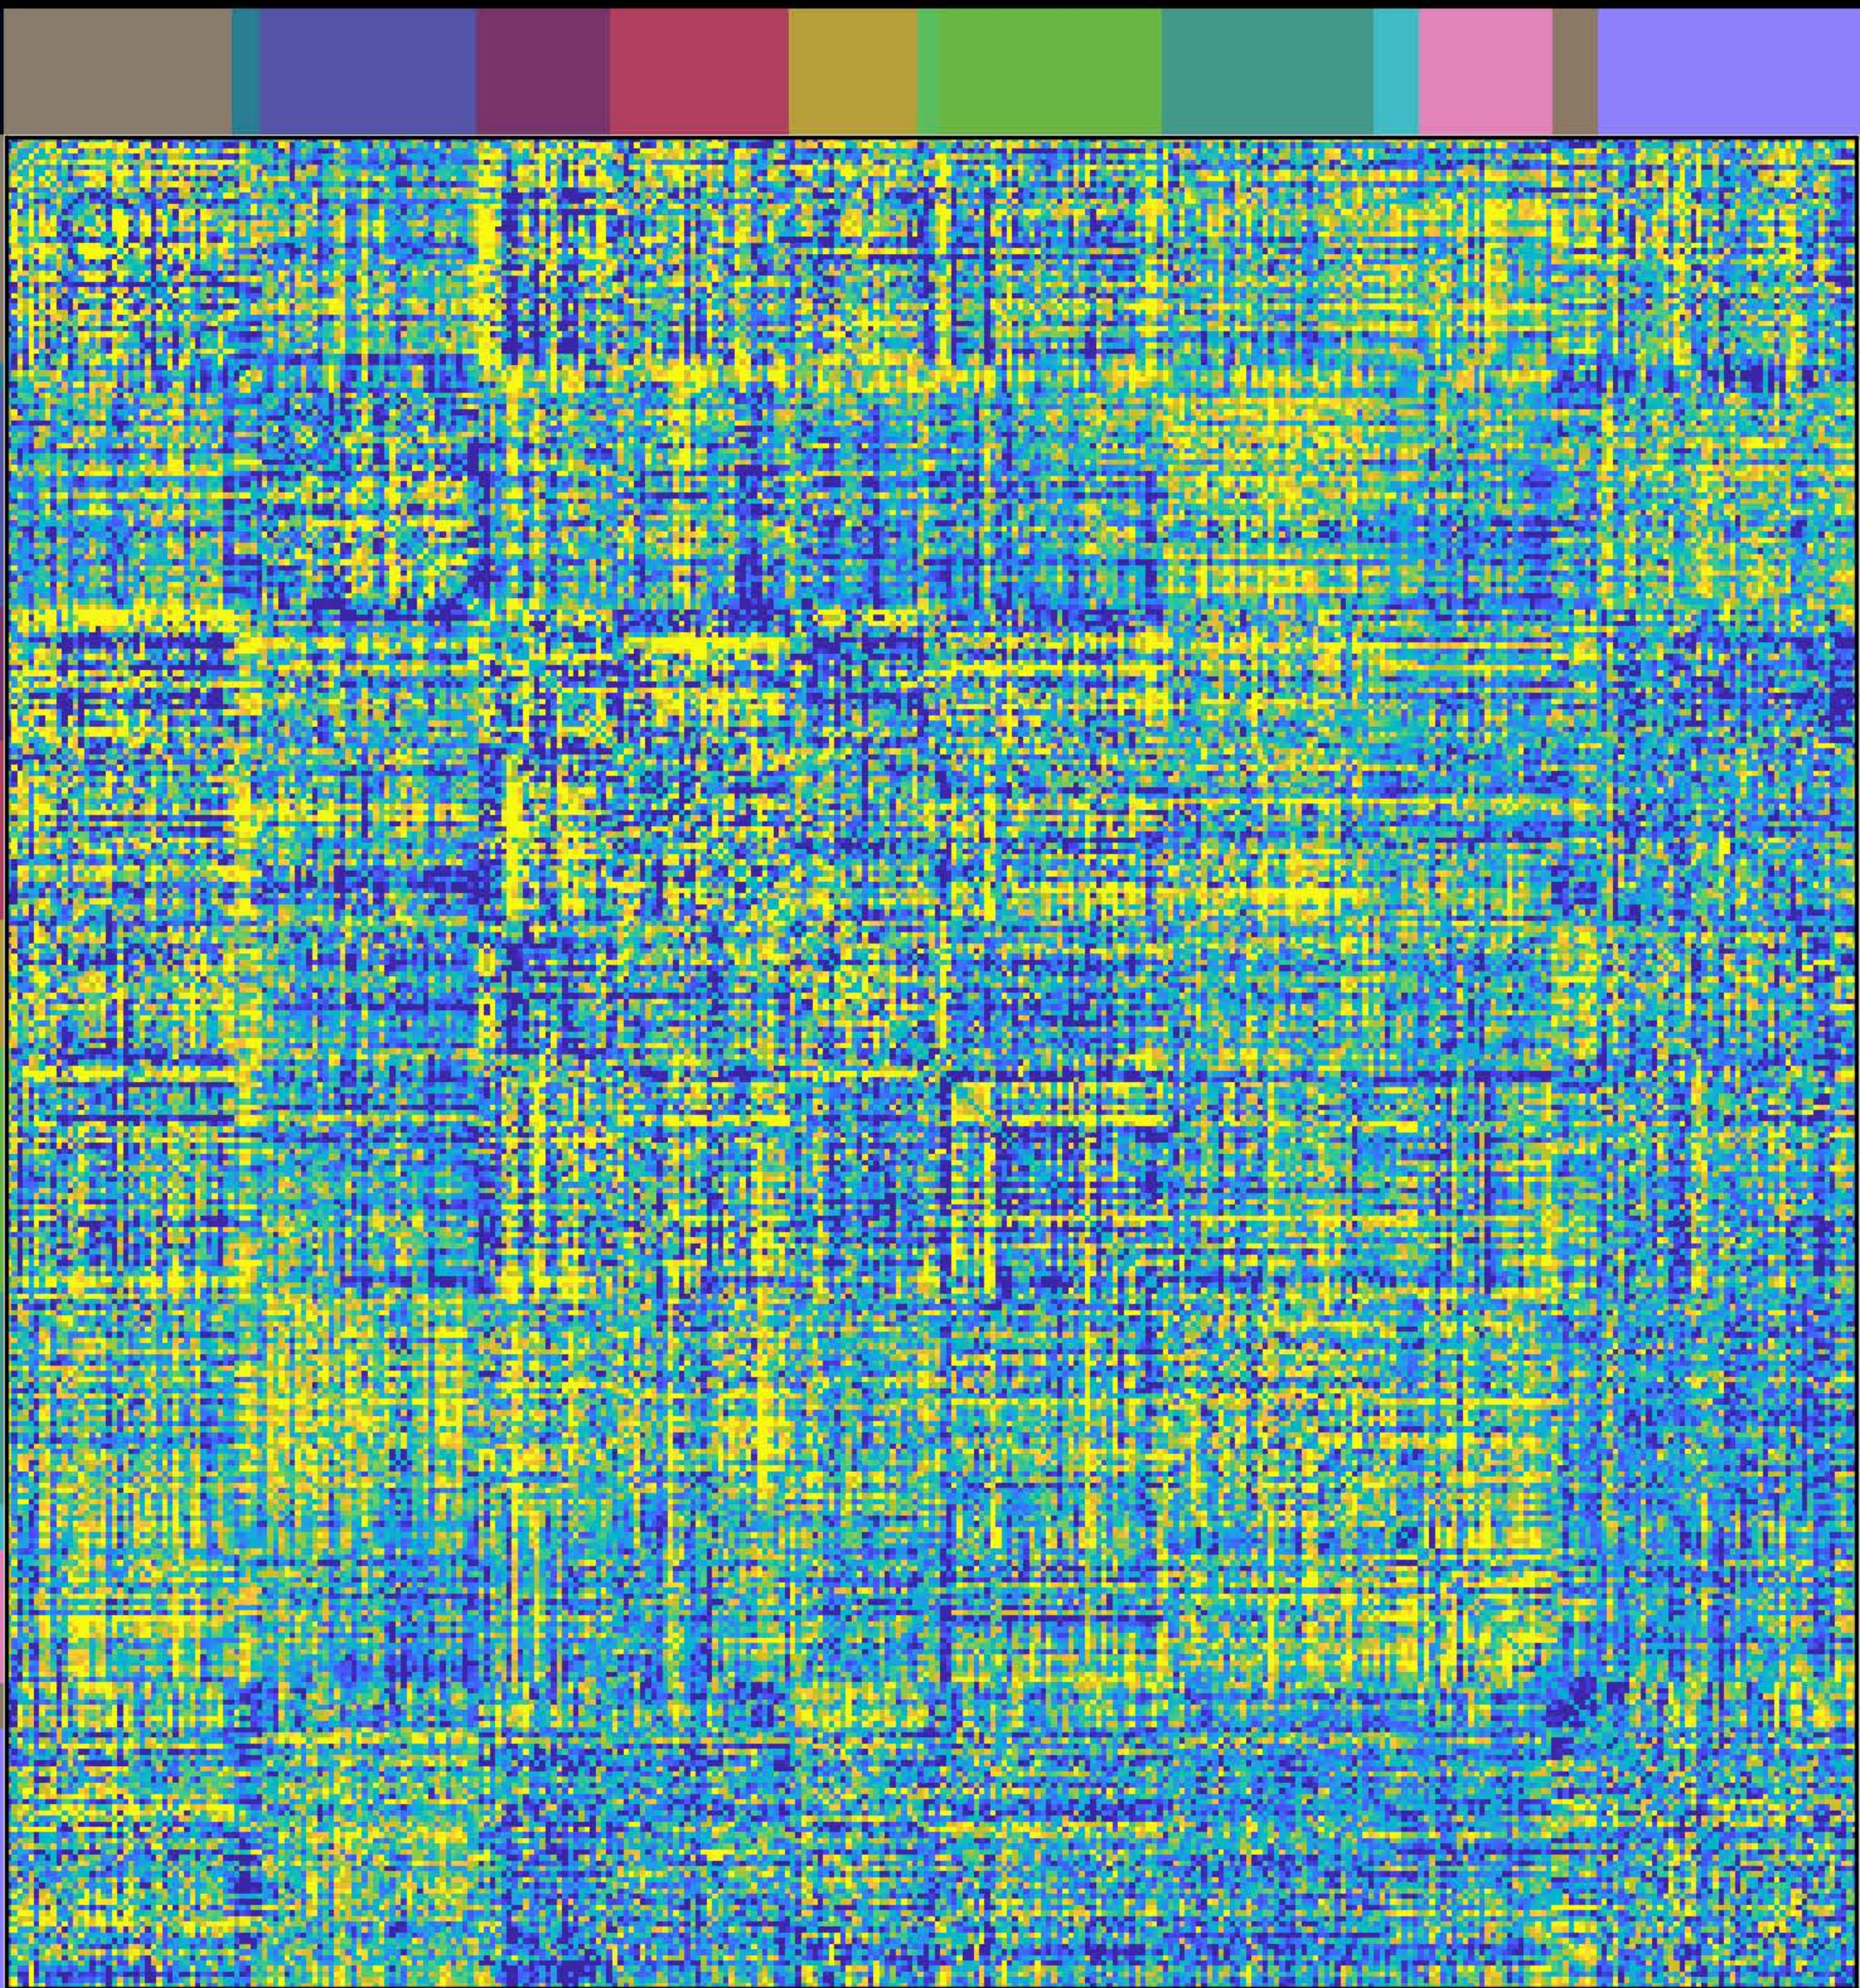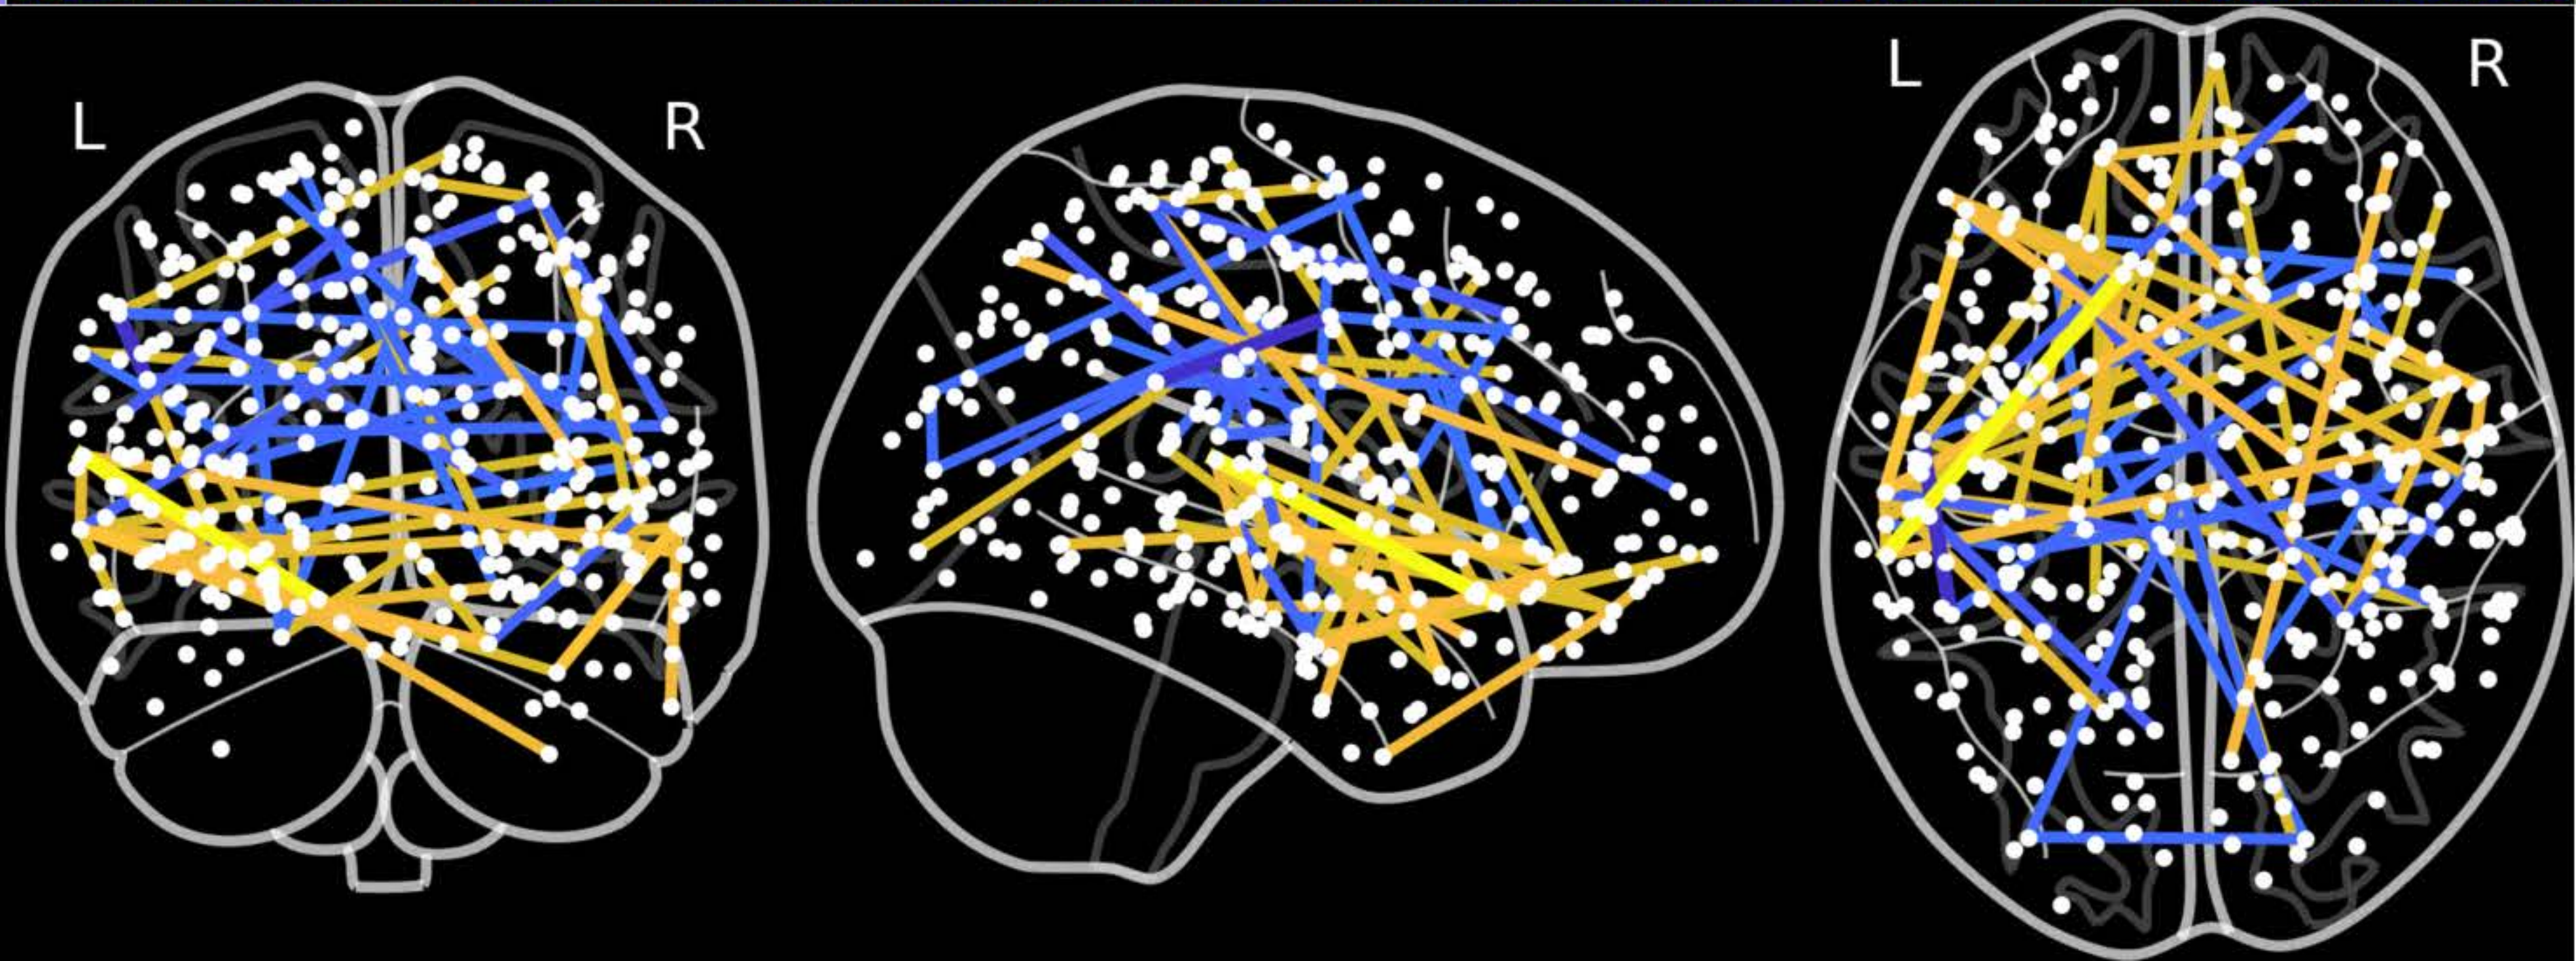



component\_51

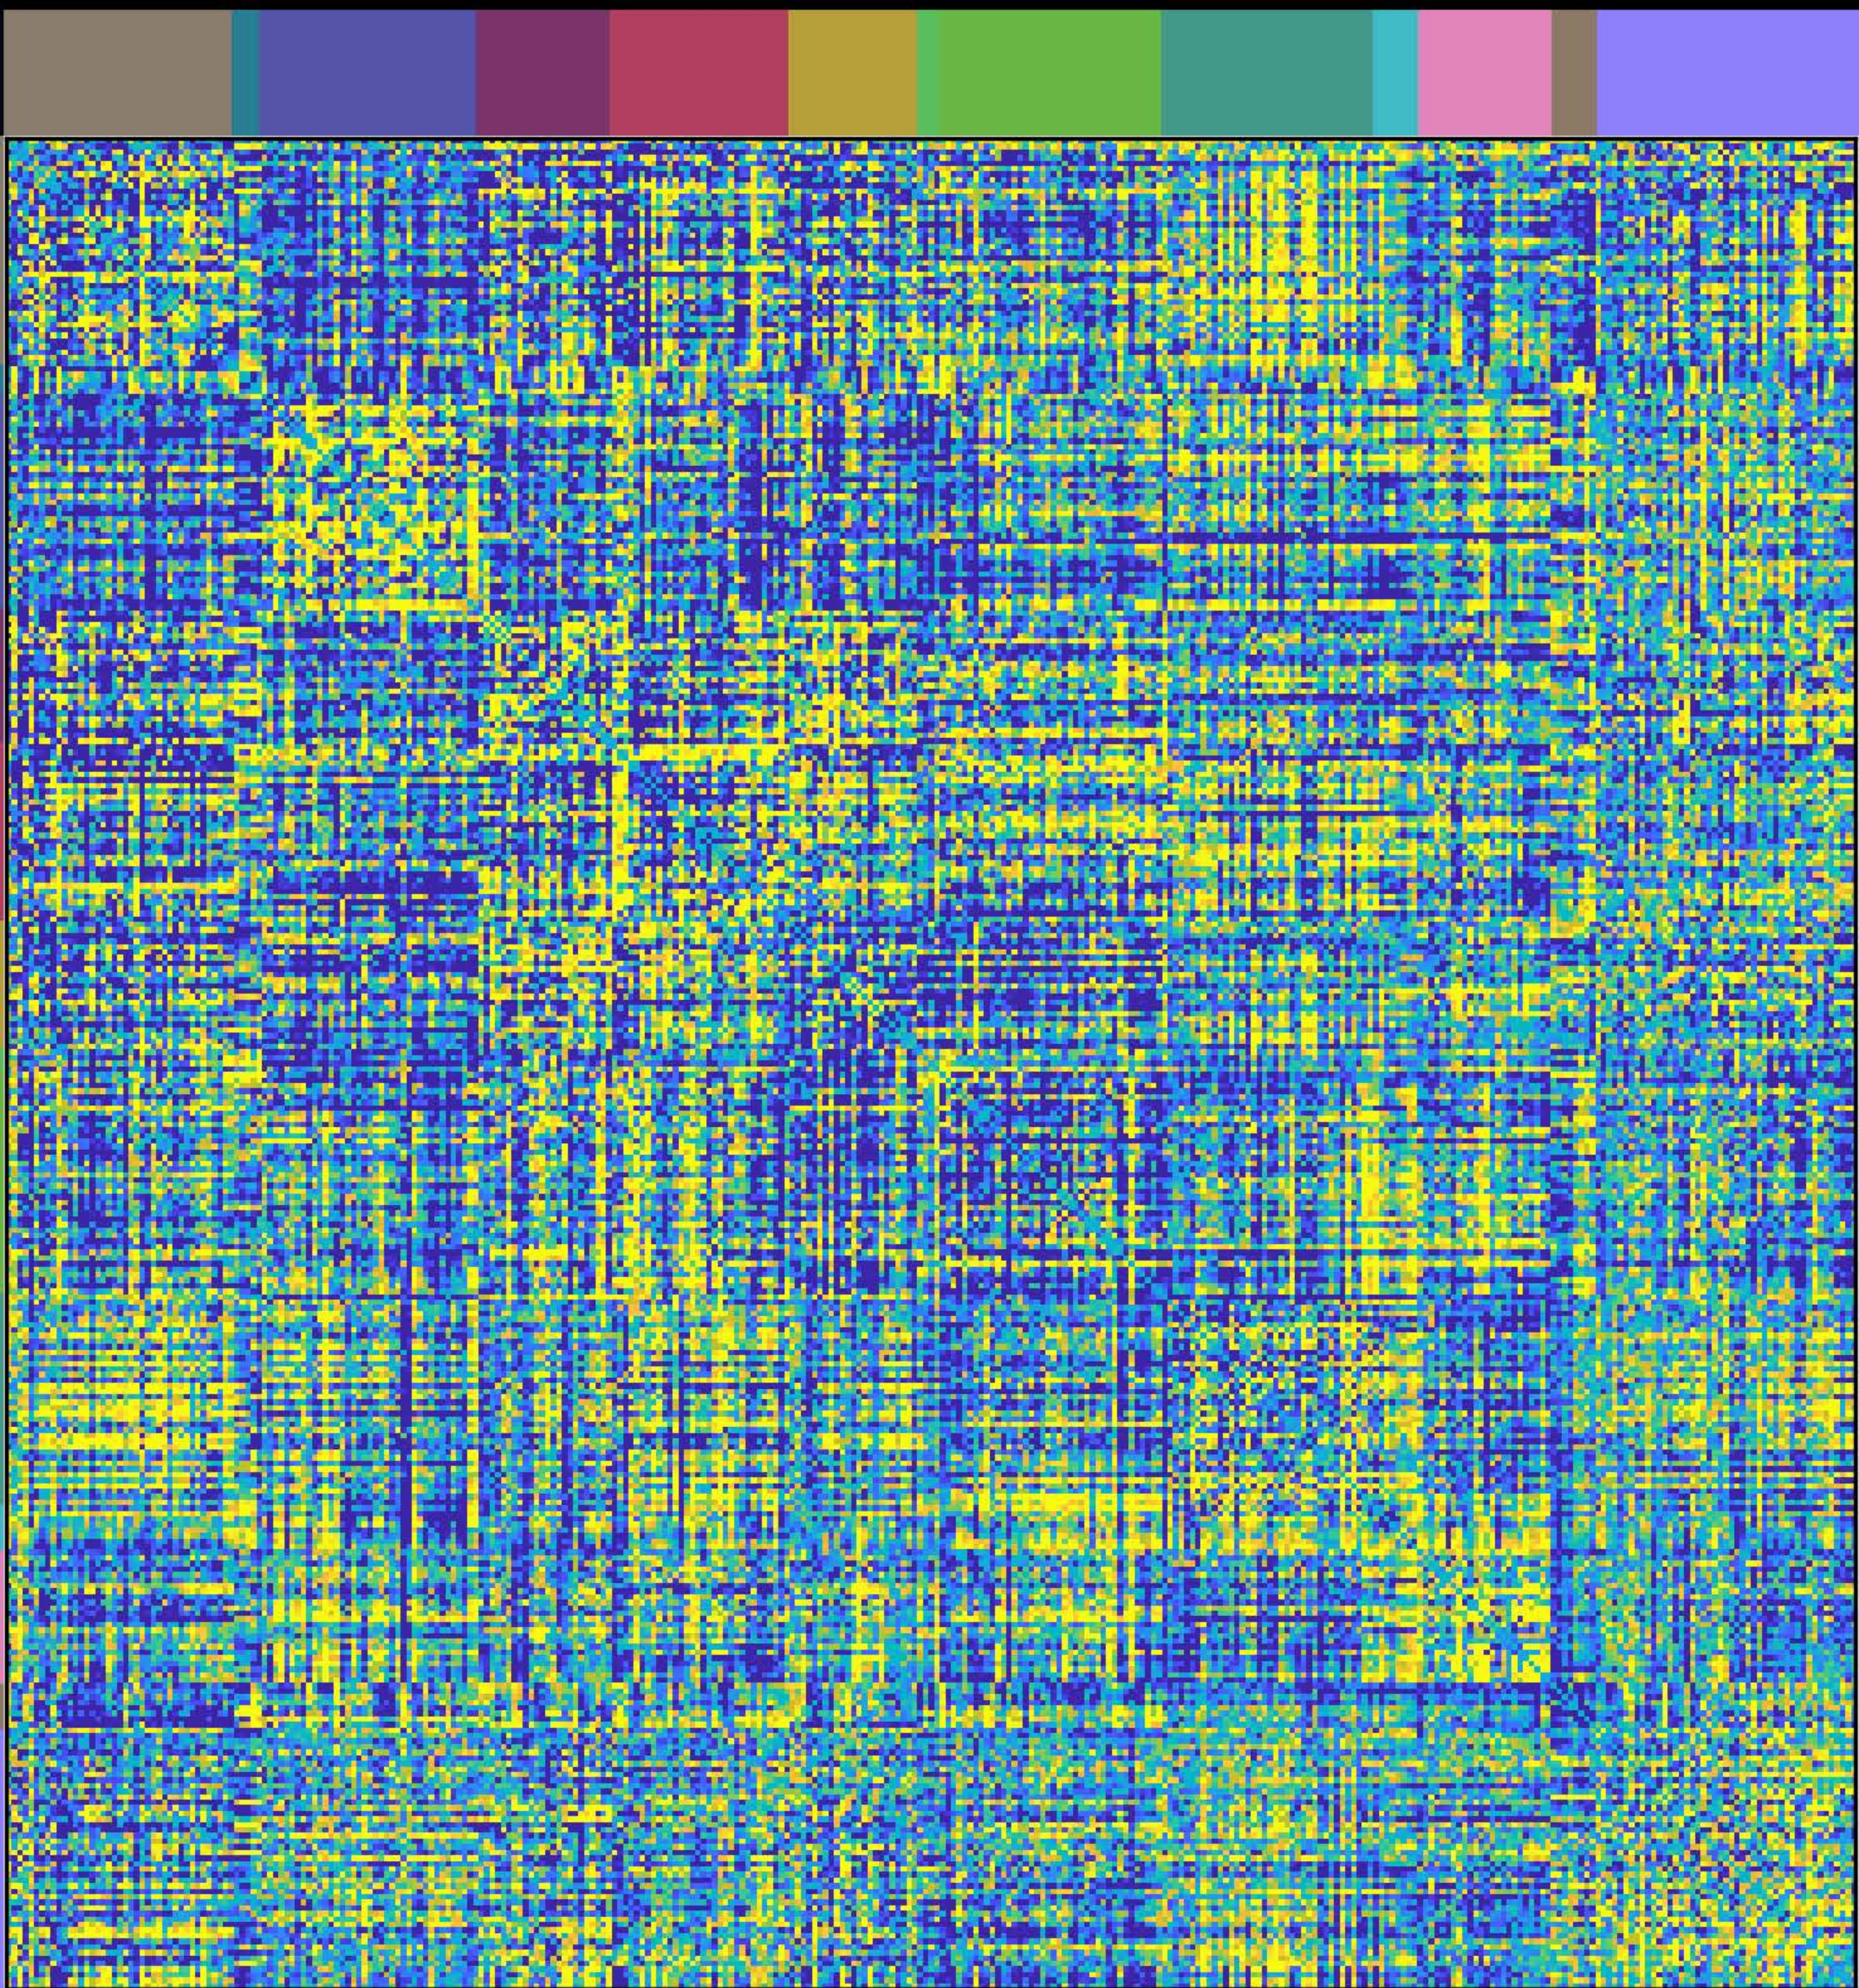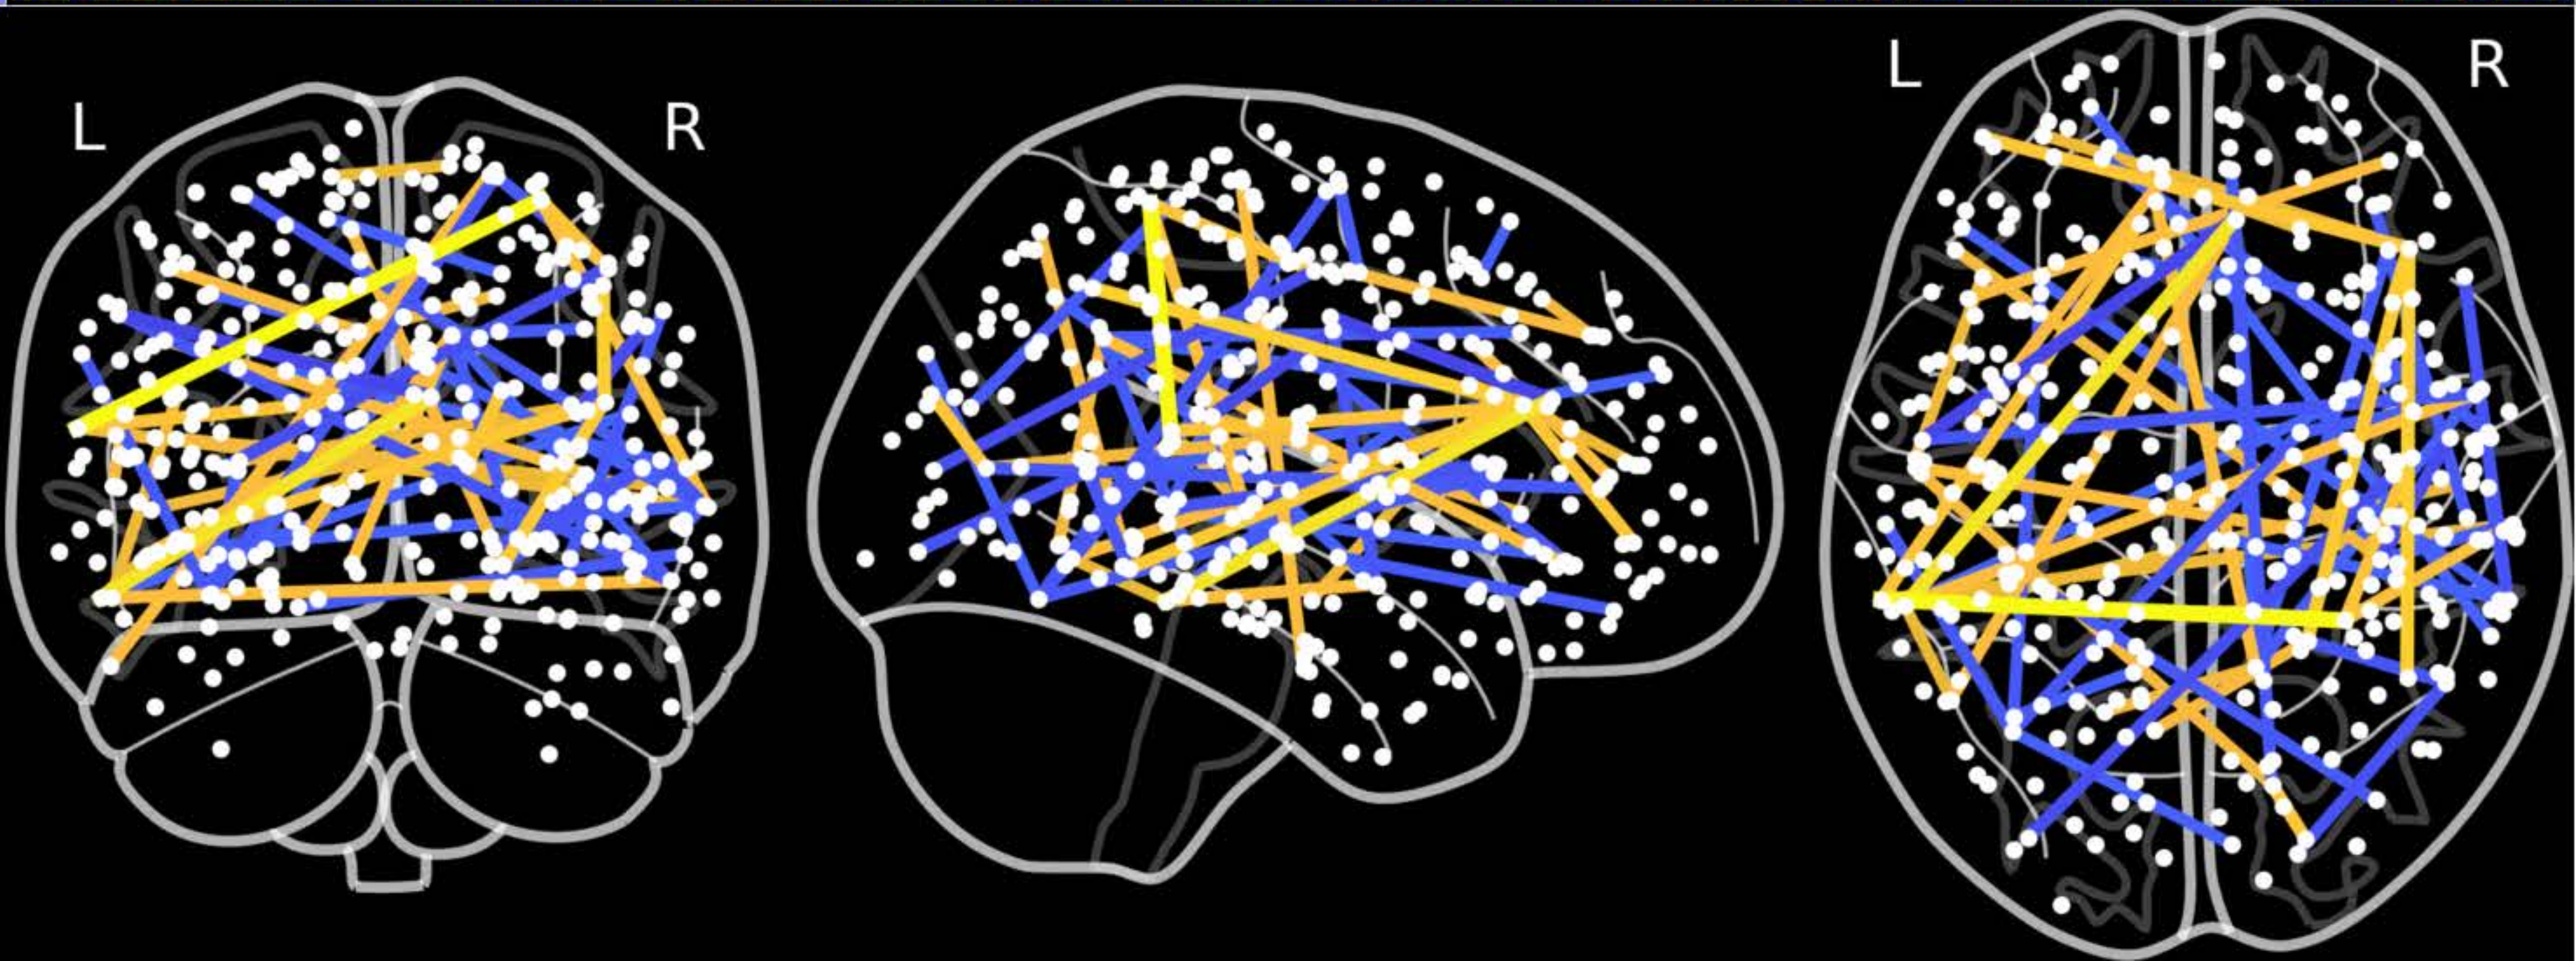



component\_52

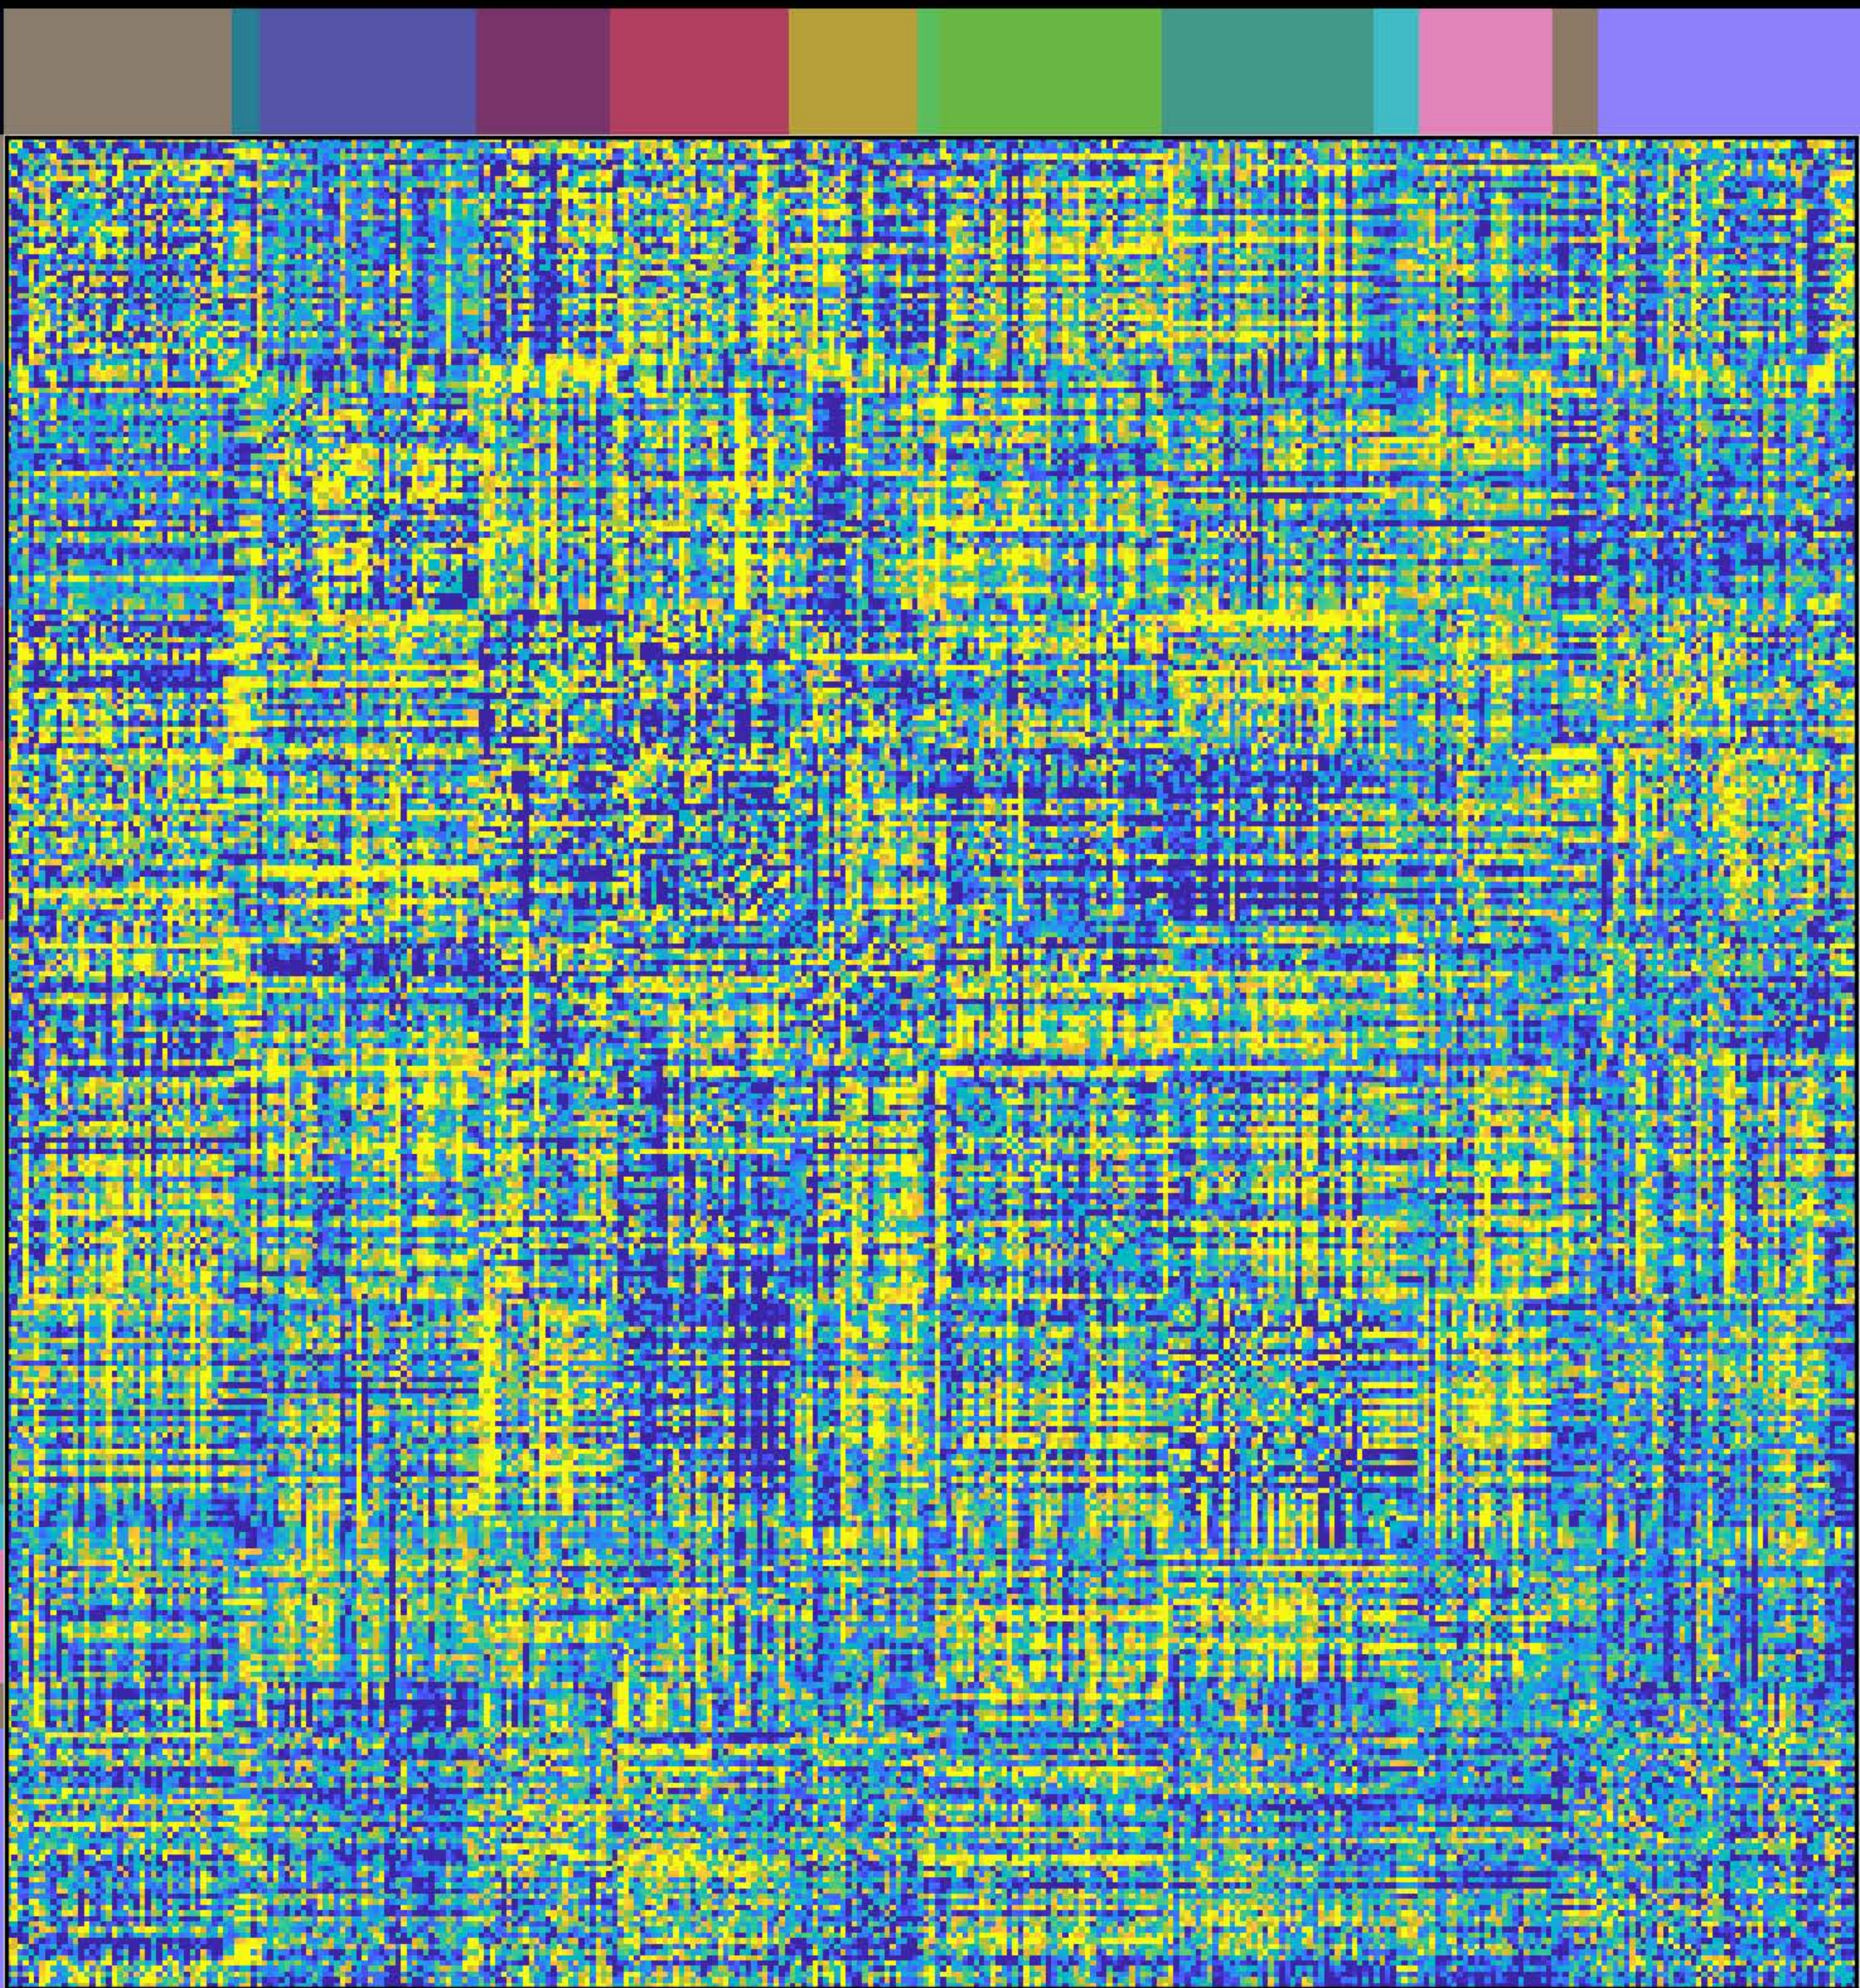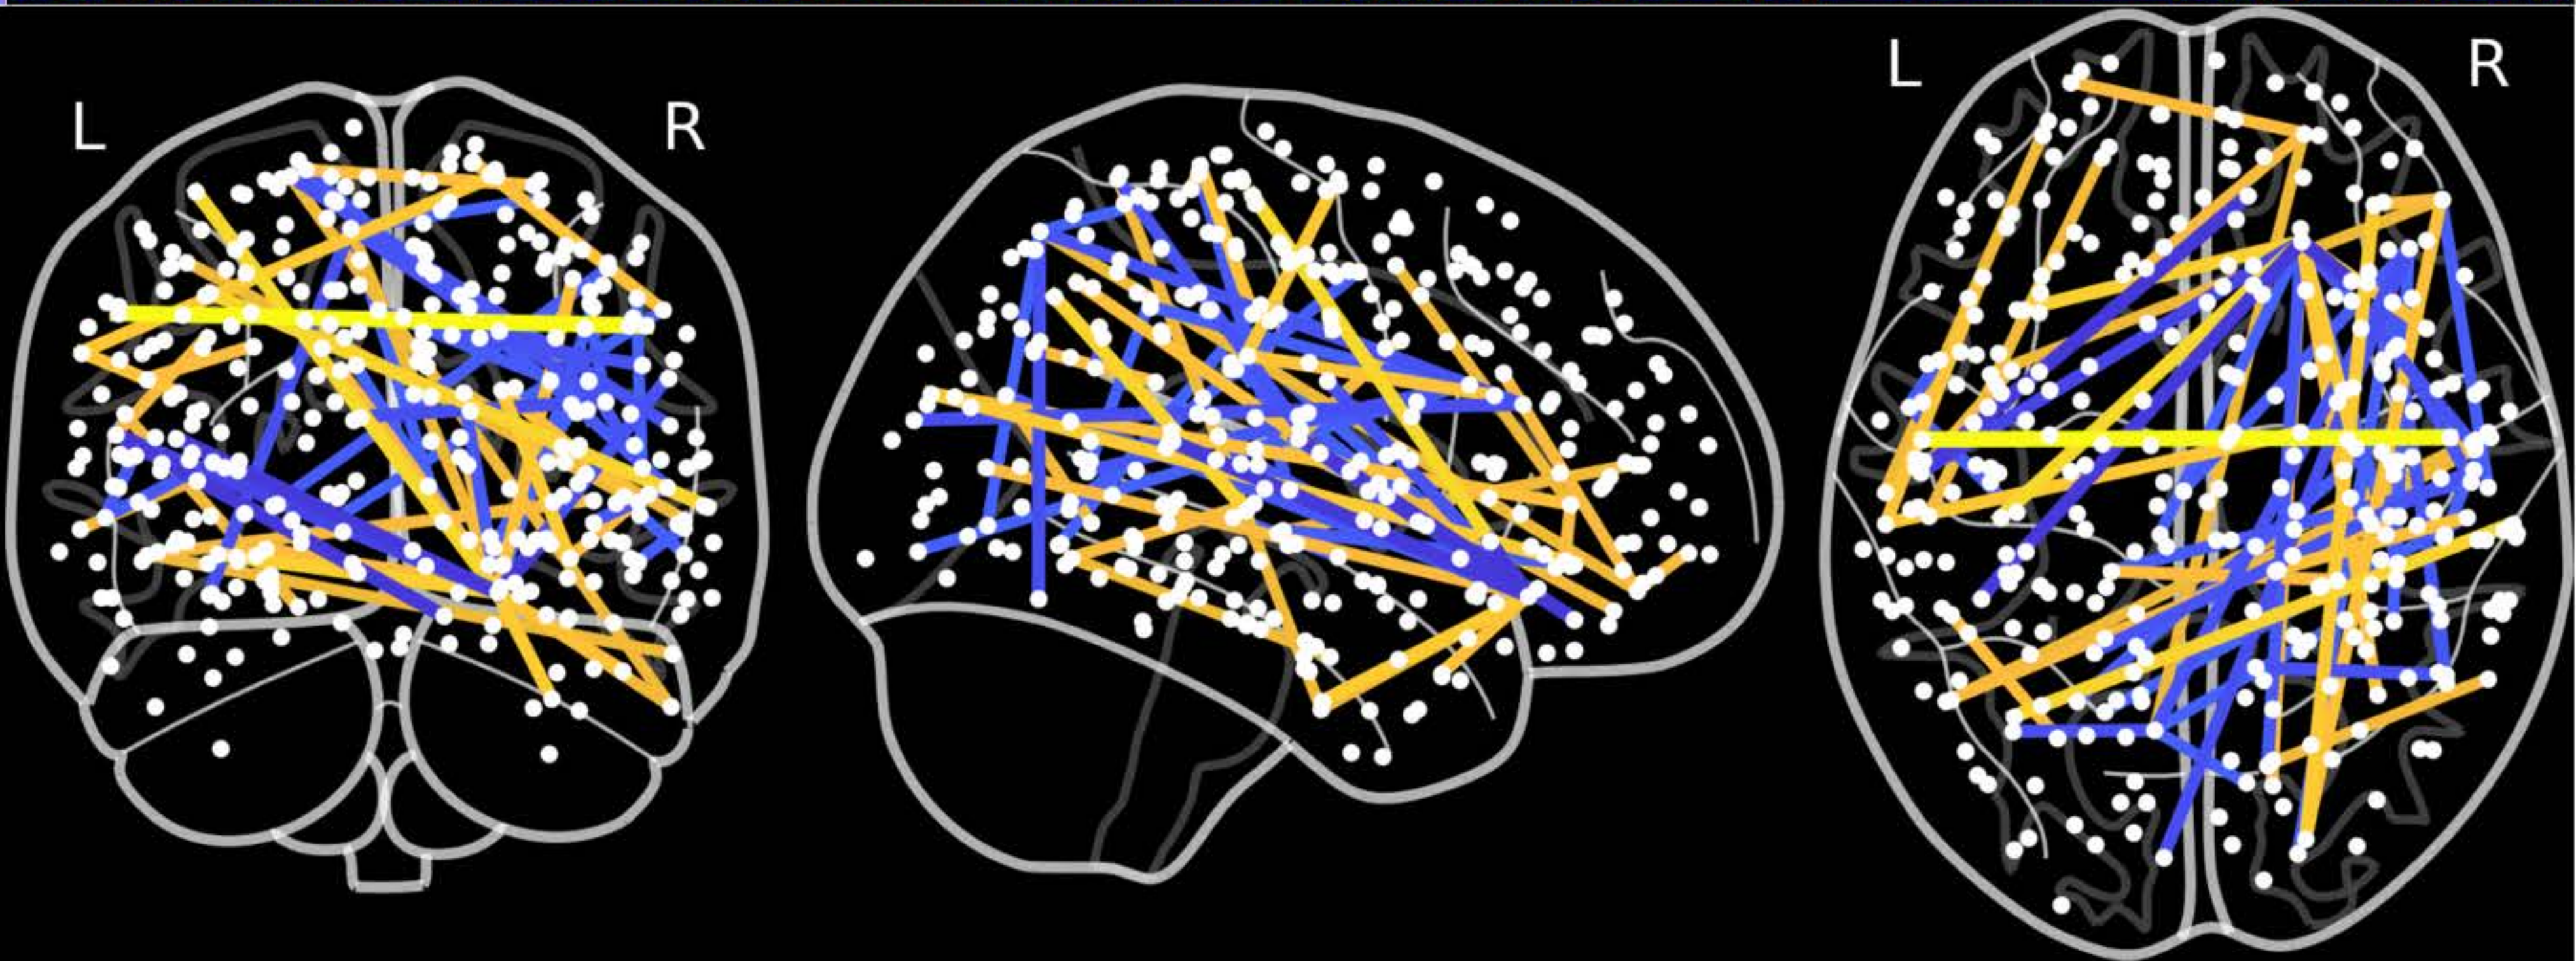



component\_53

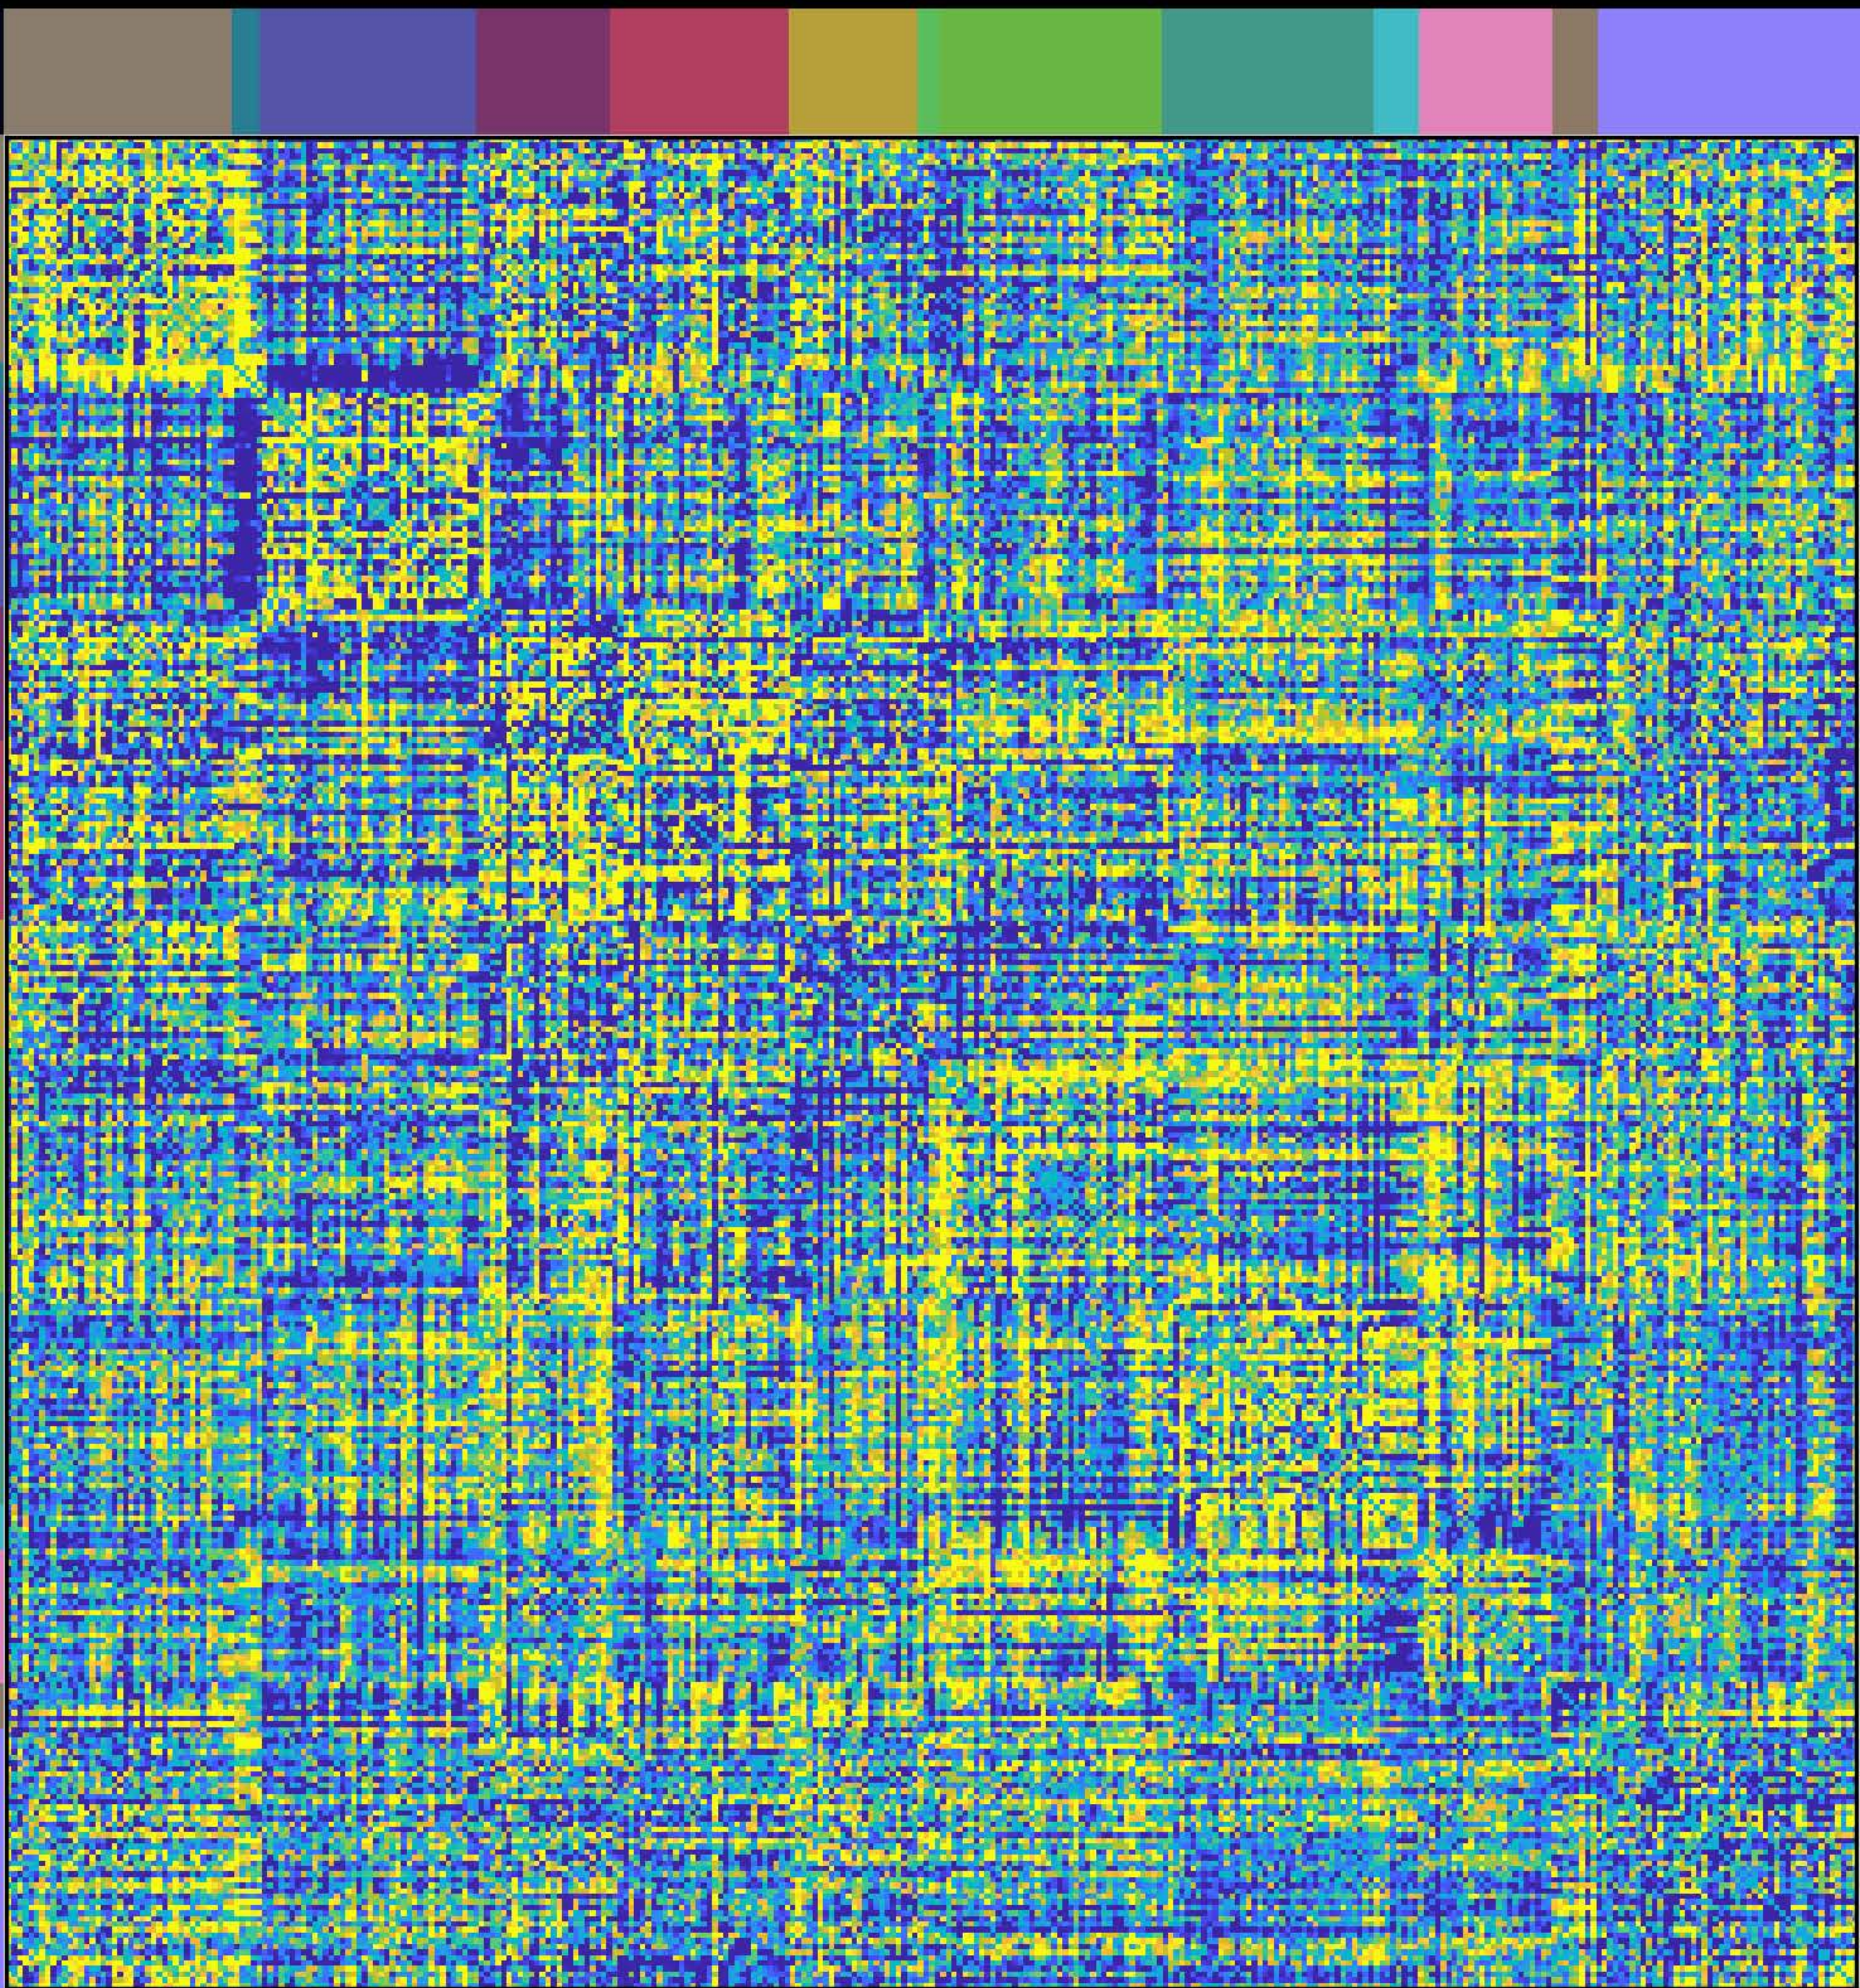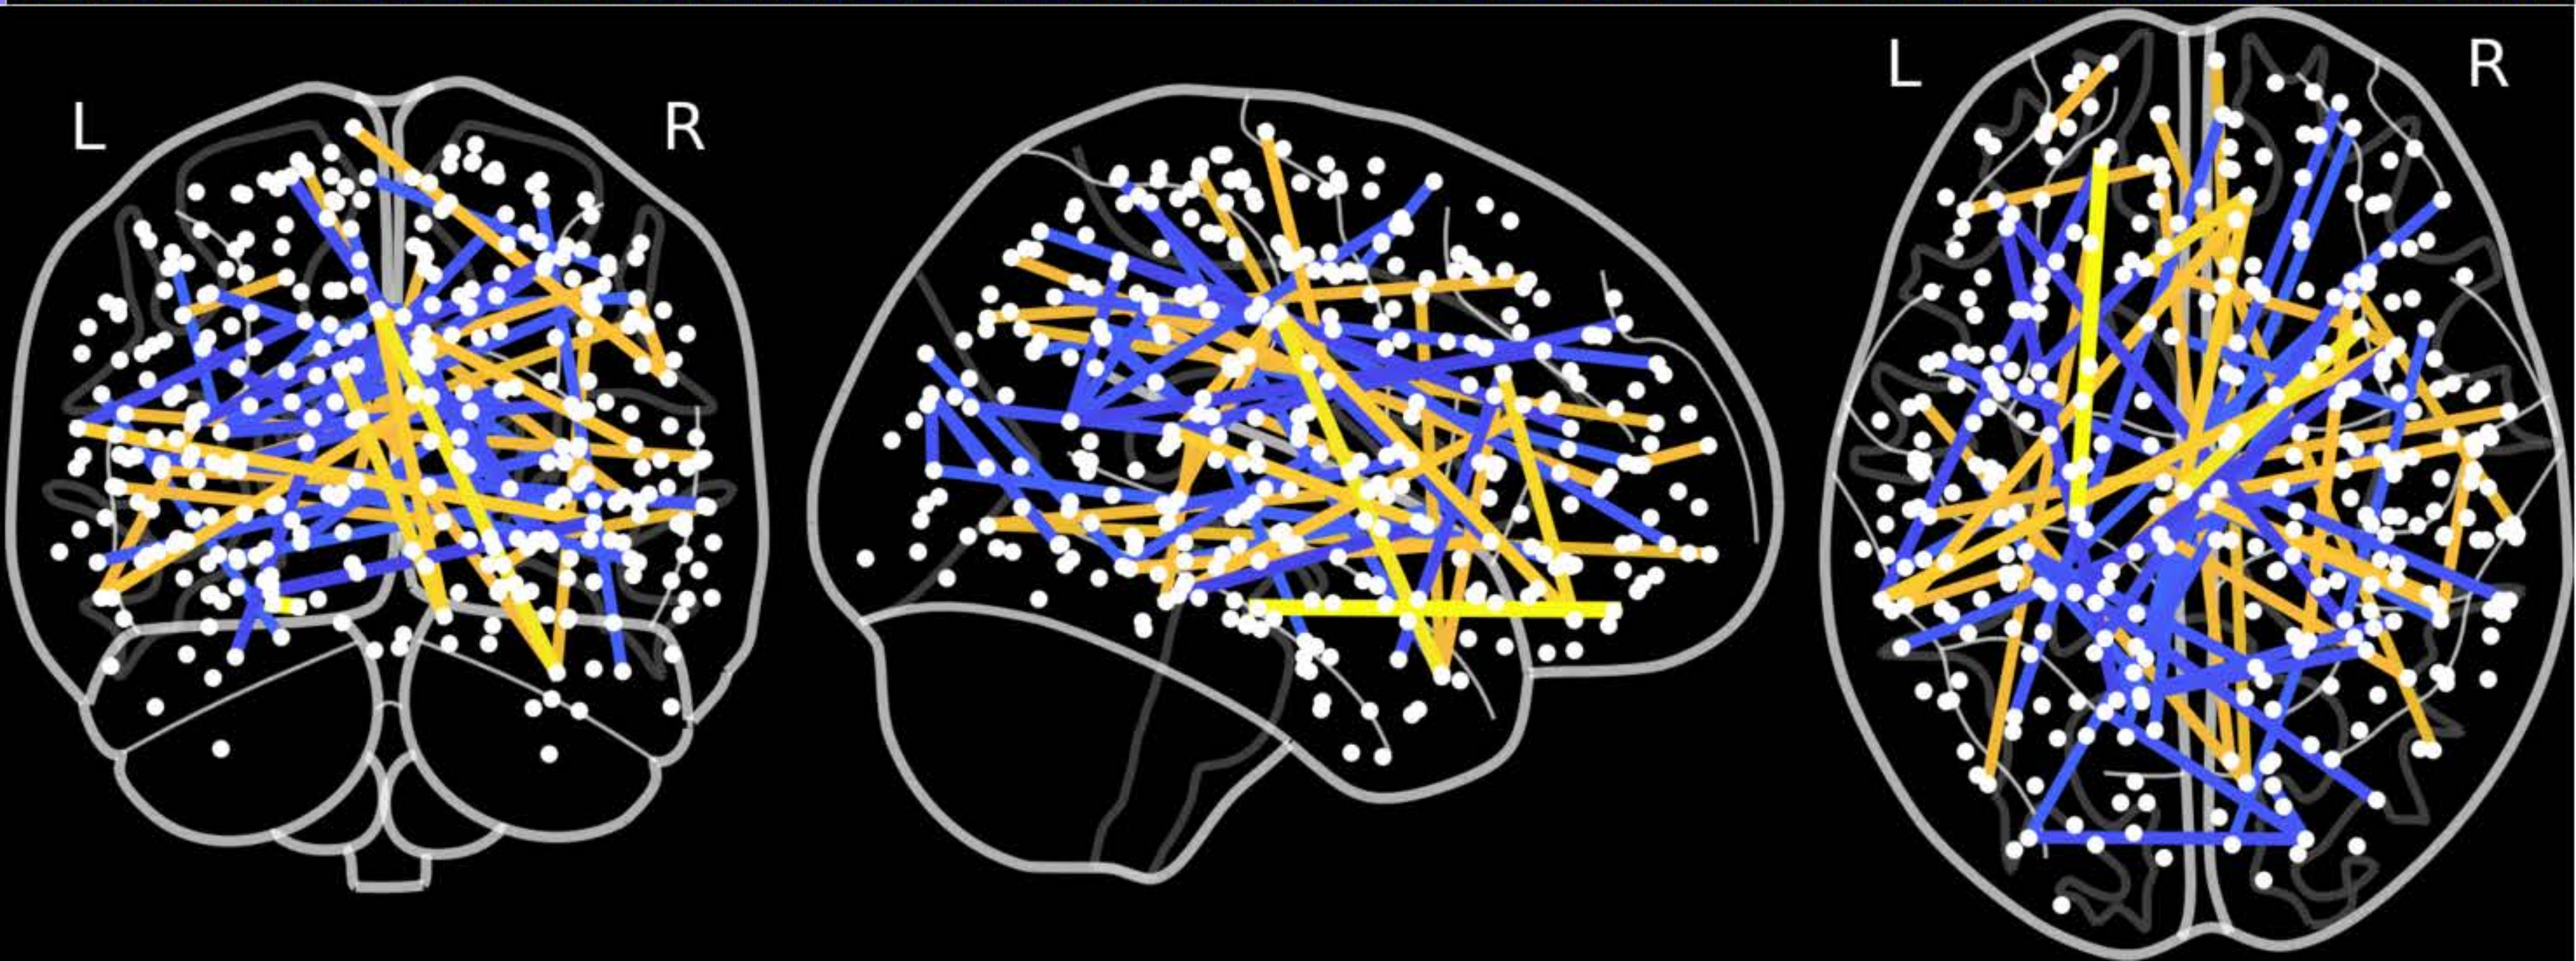



component\_54

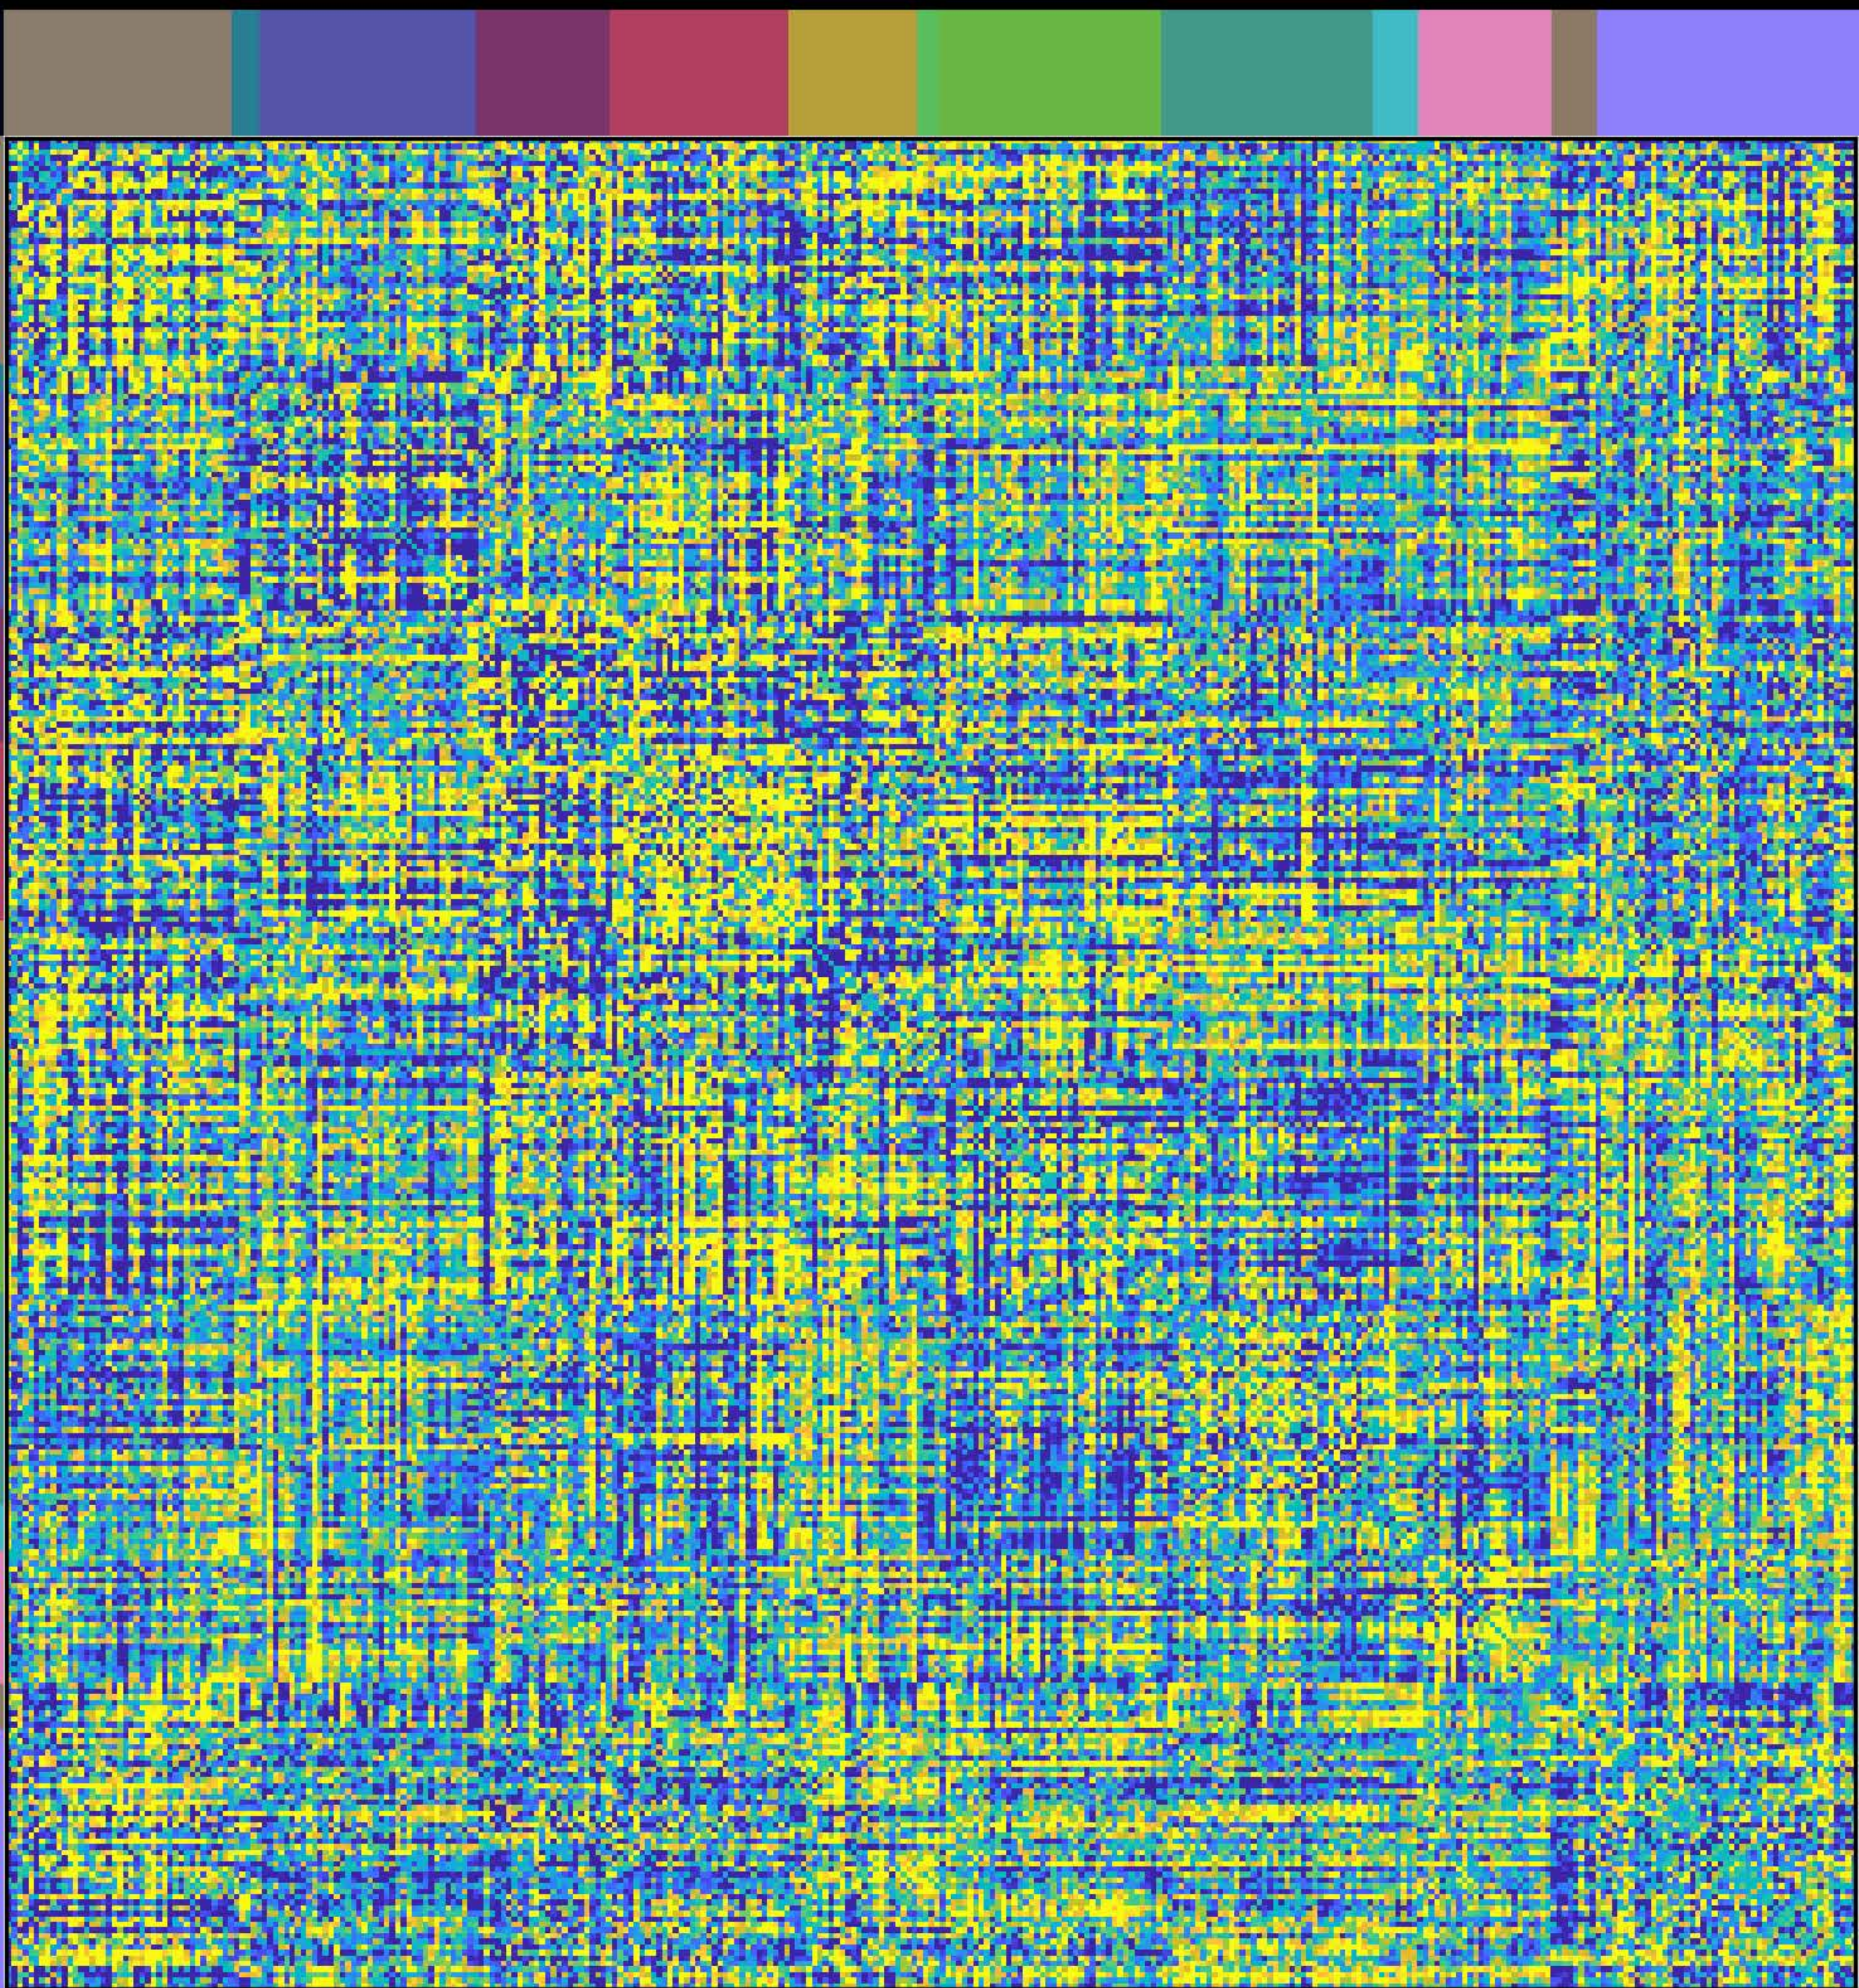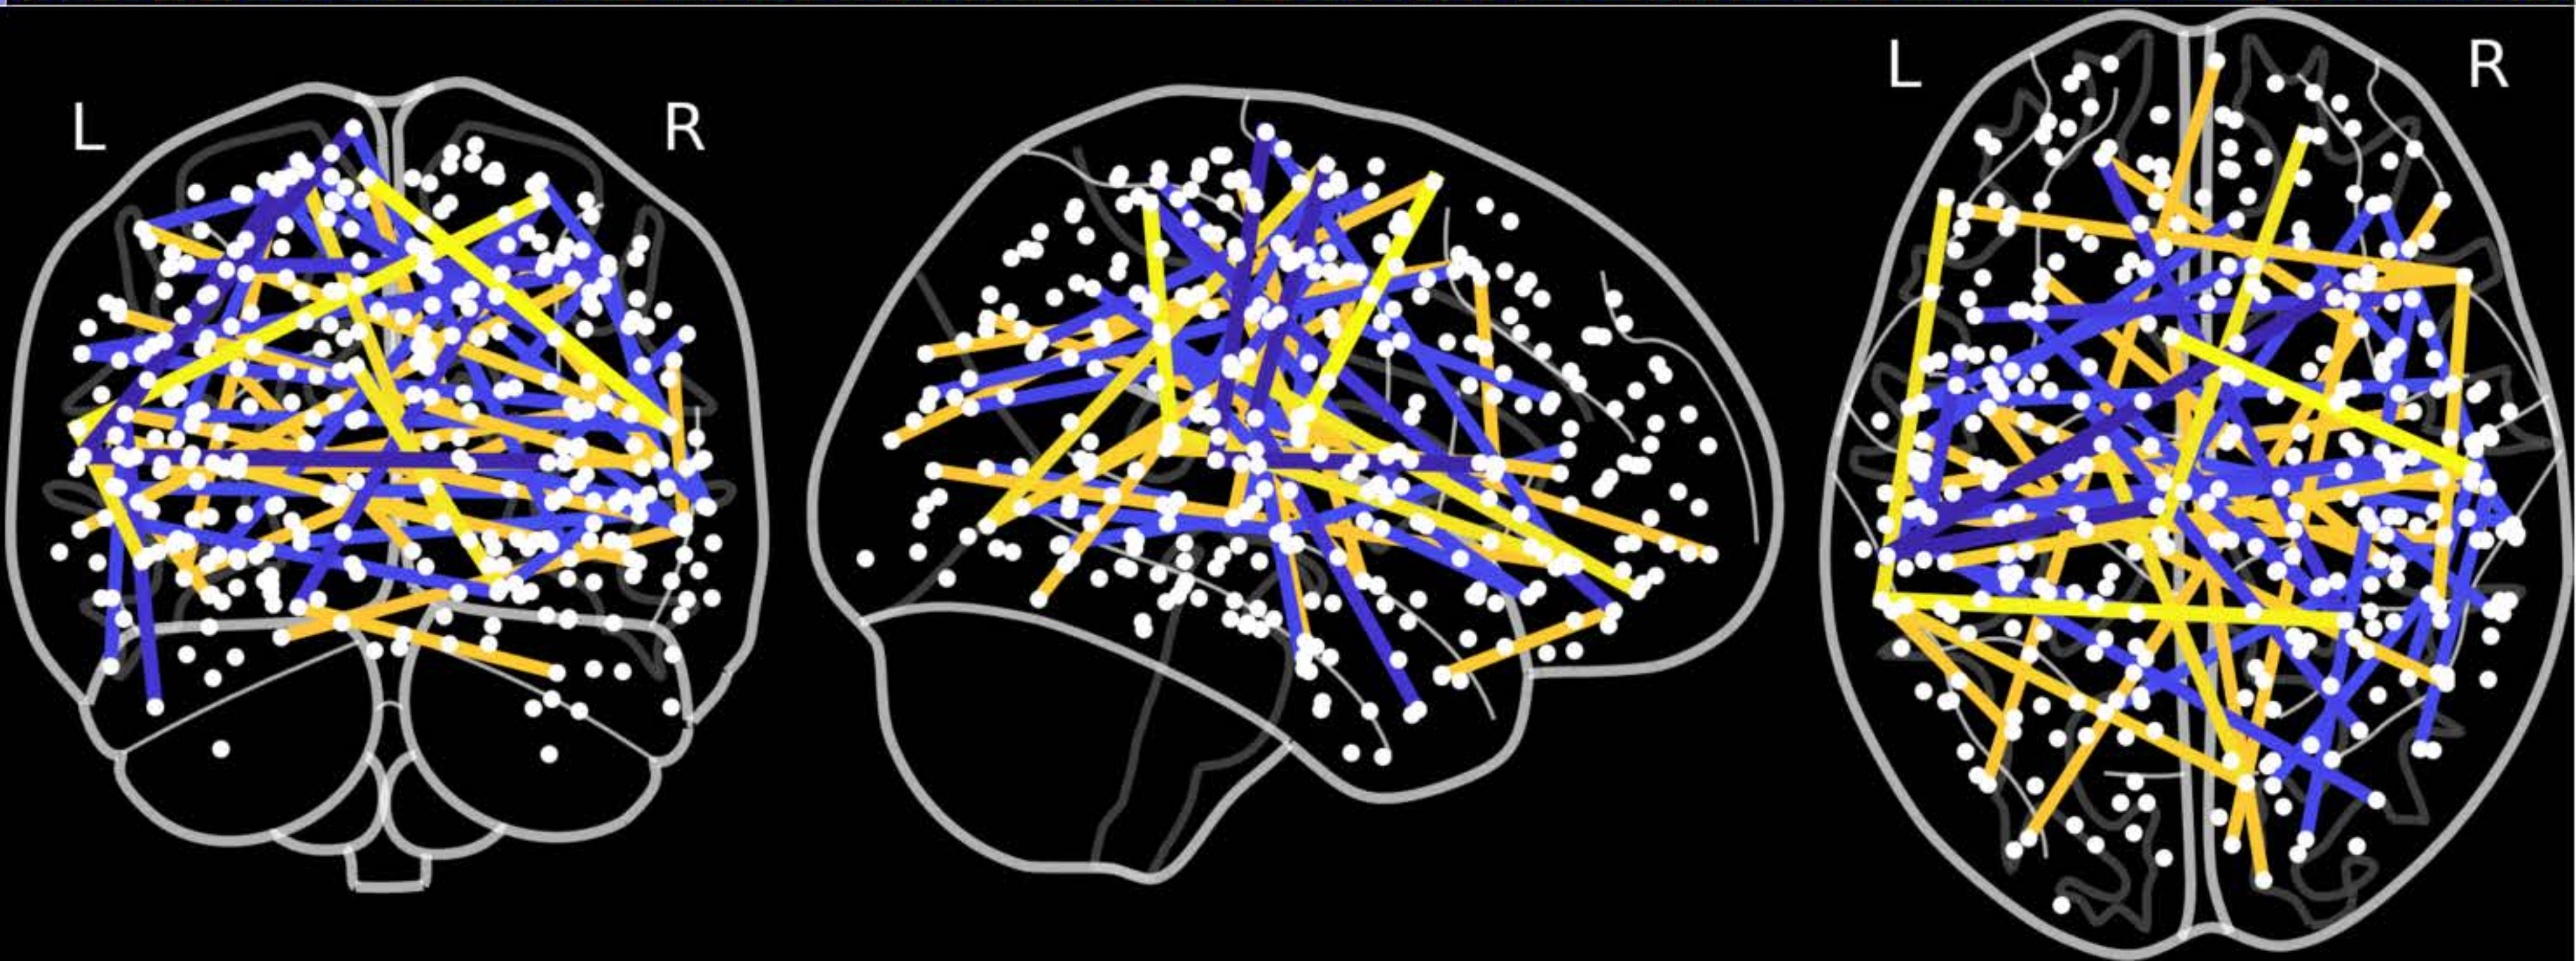



component\_55

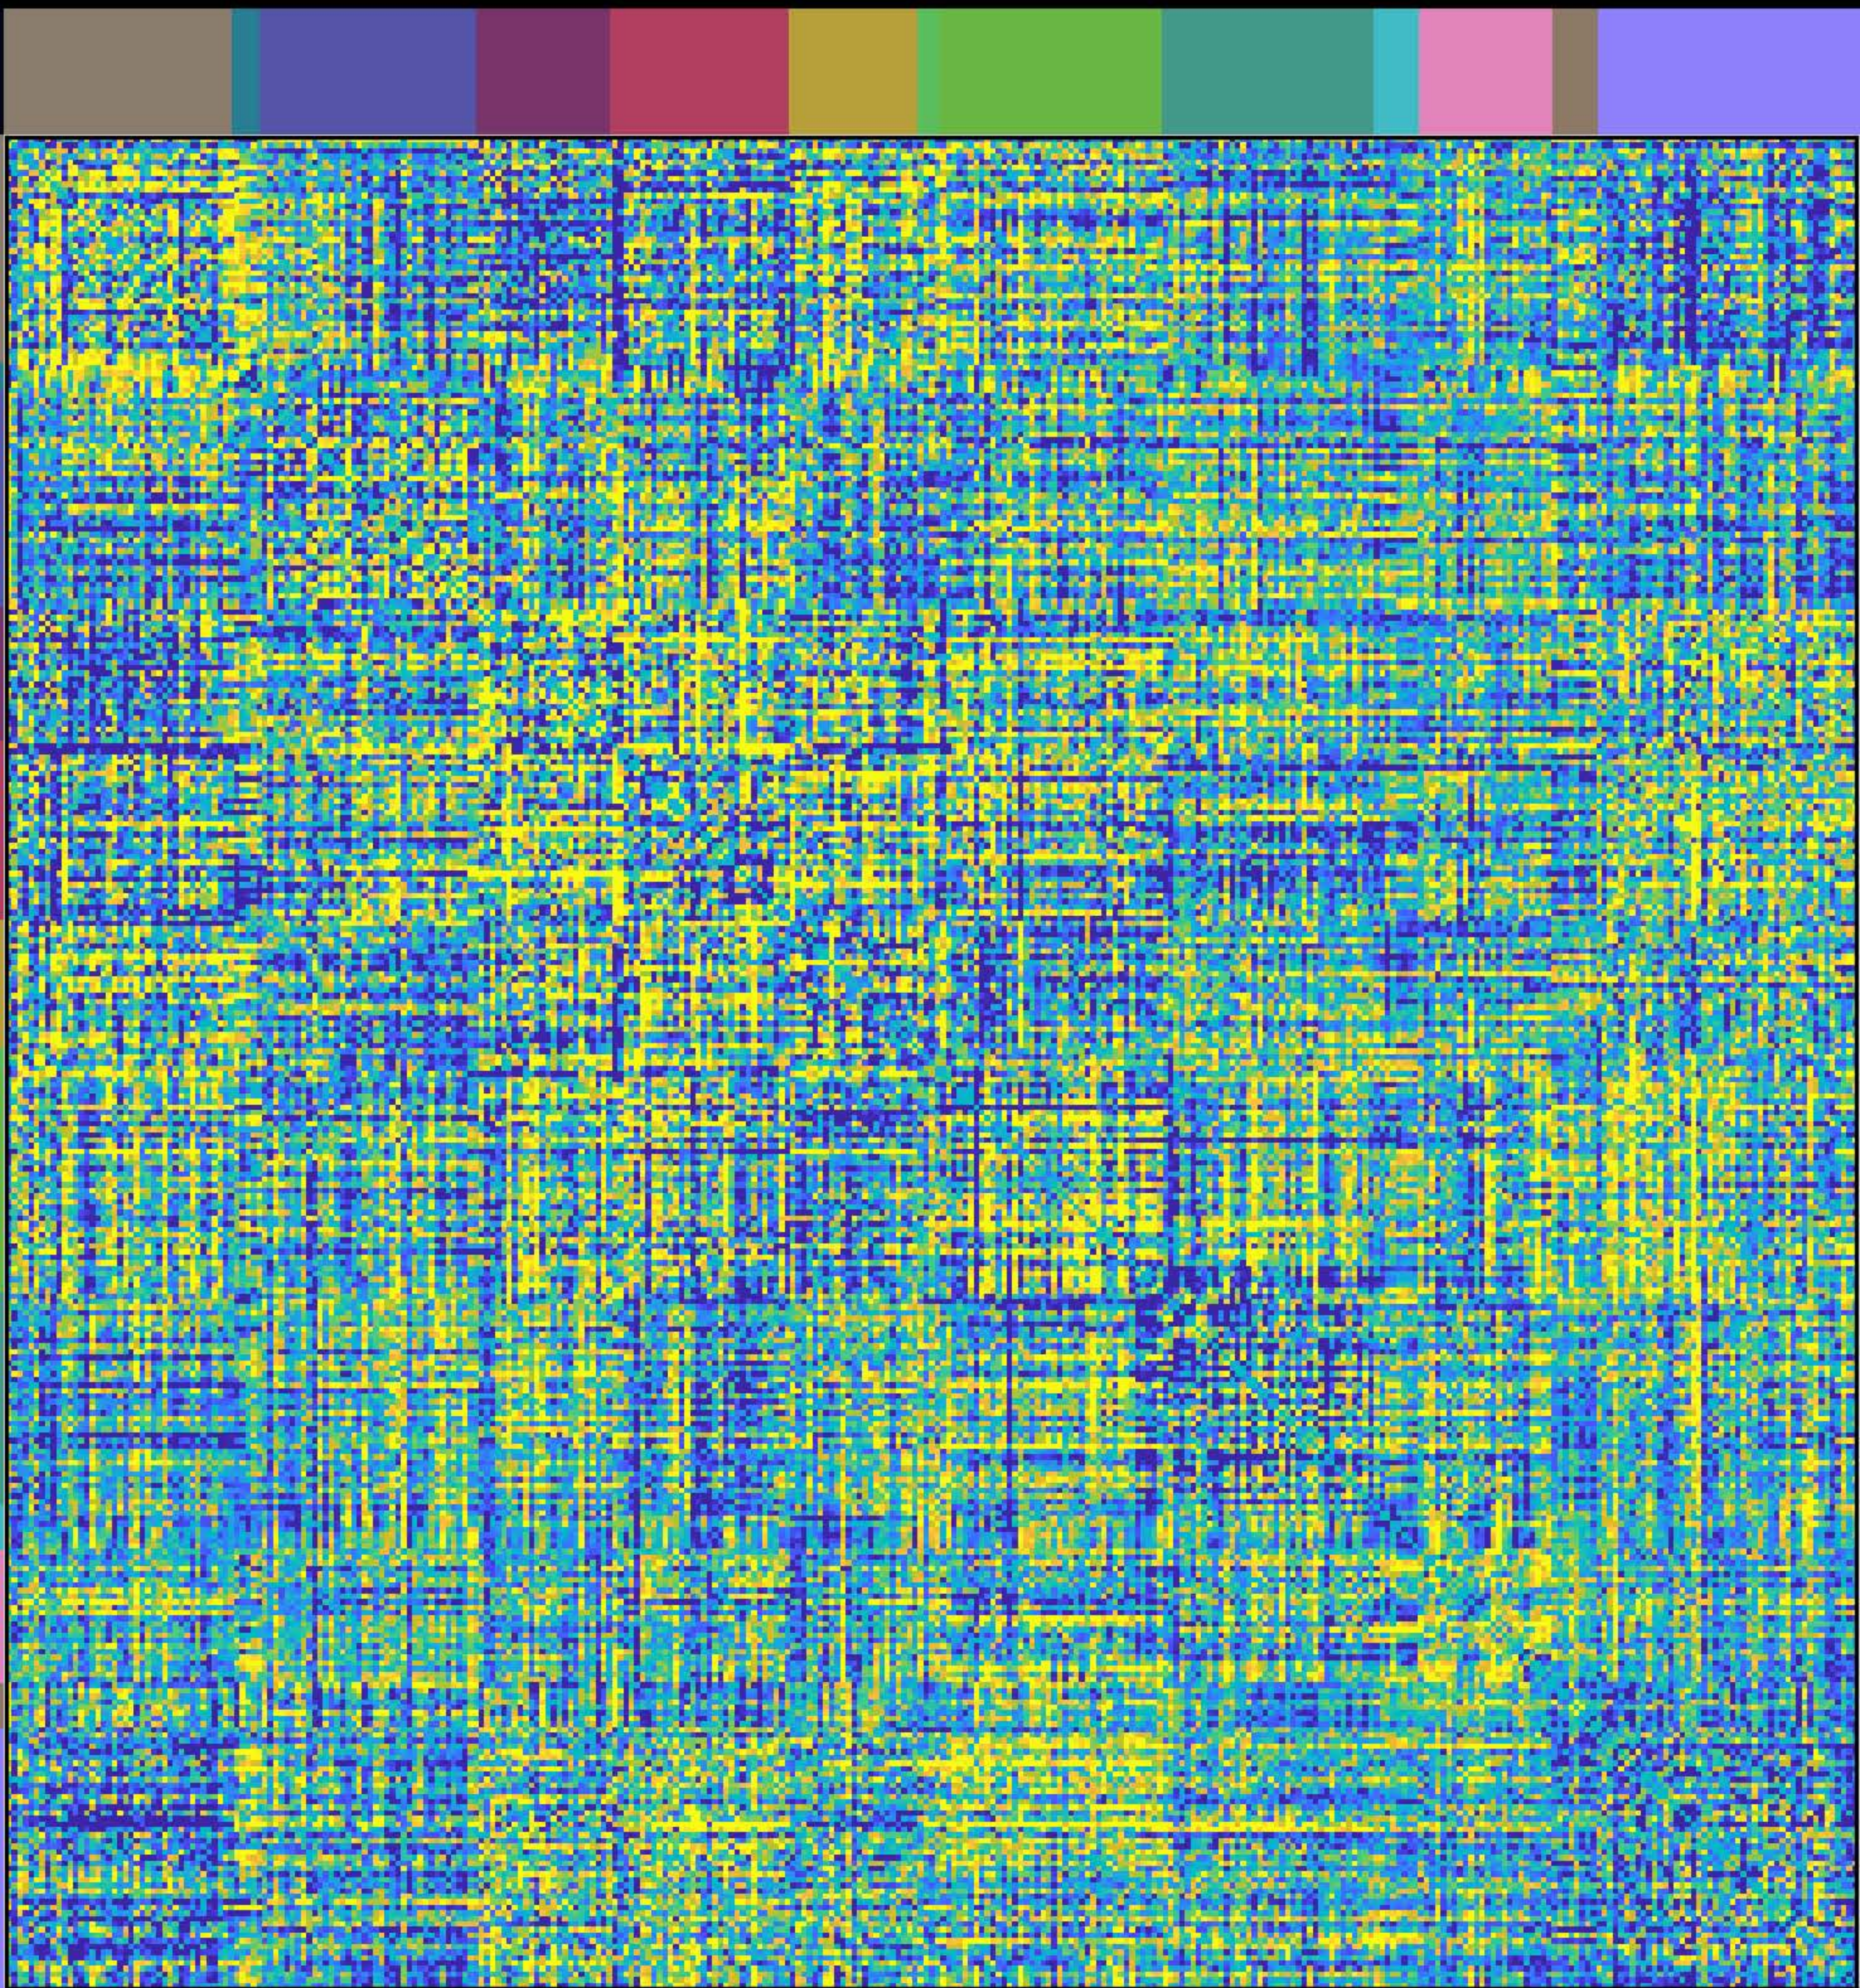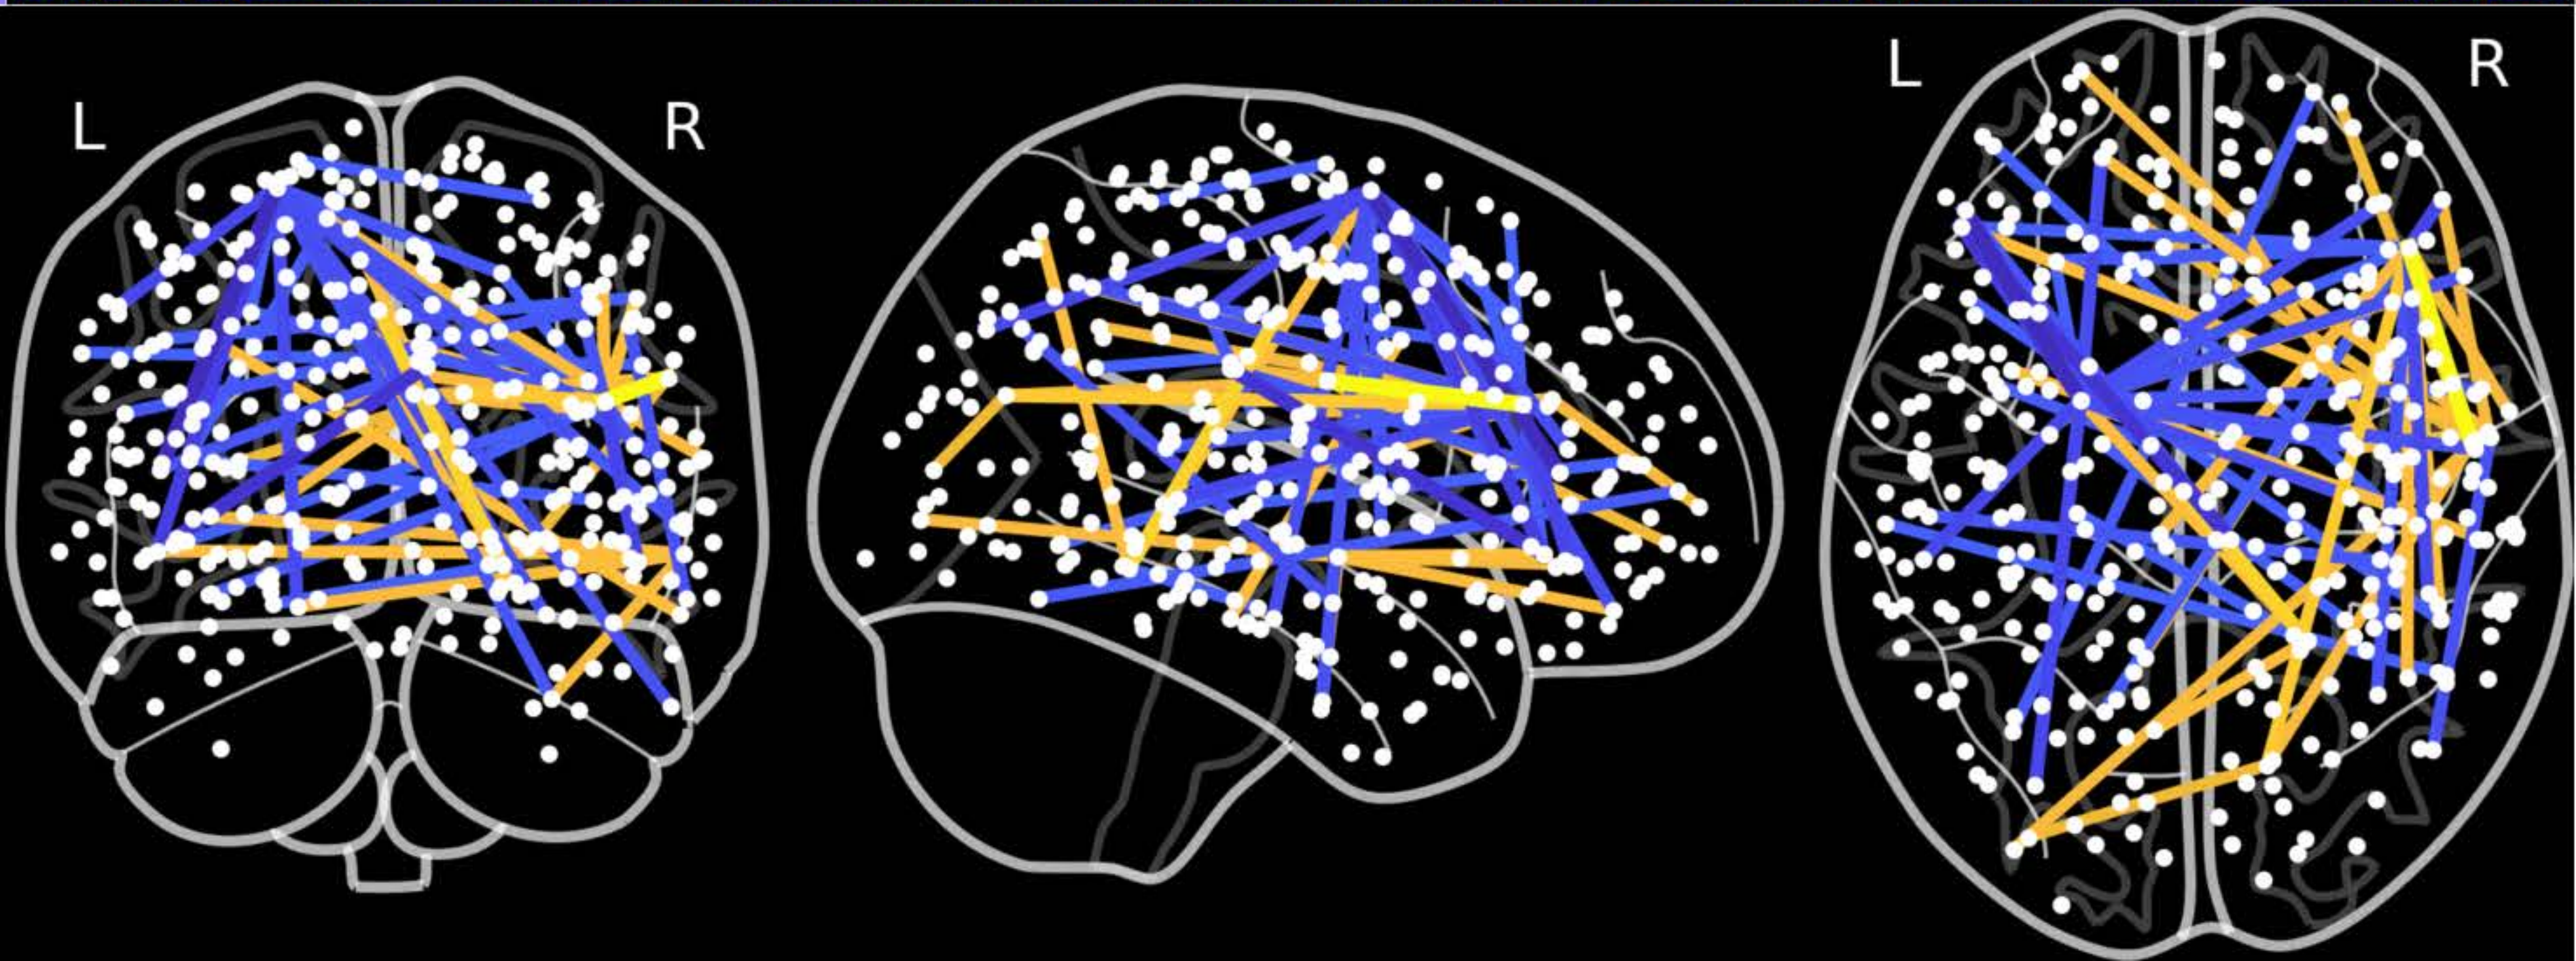



component\_56

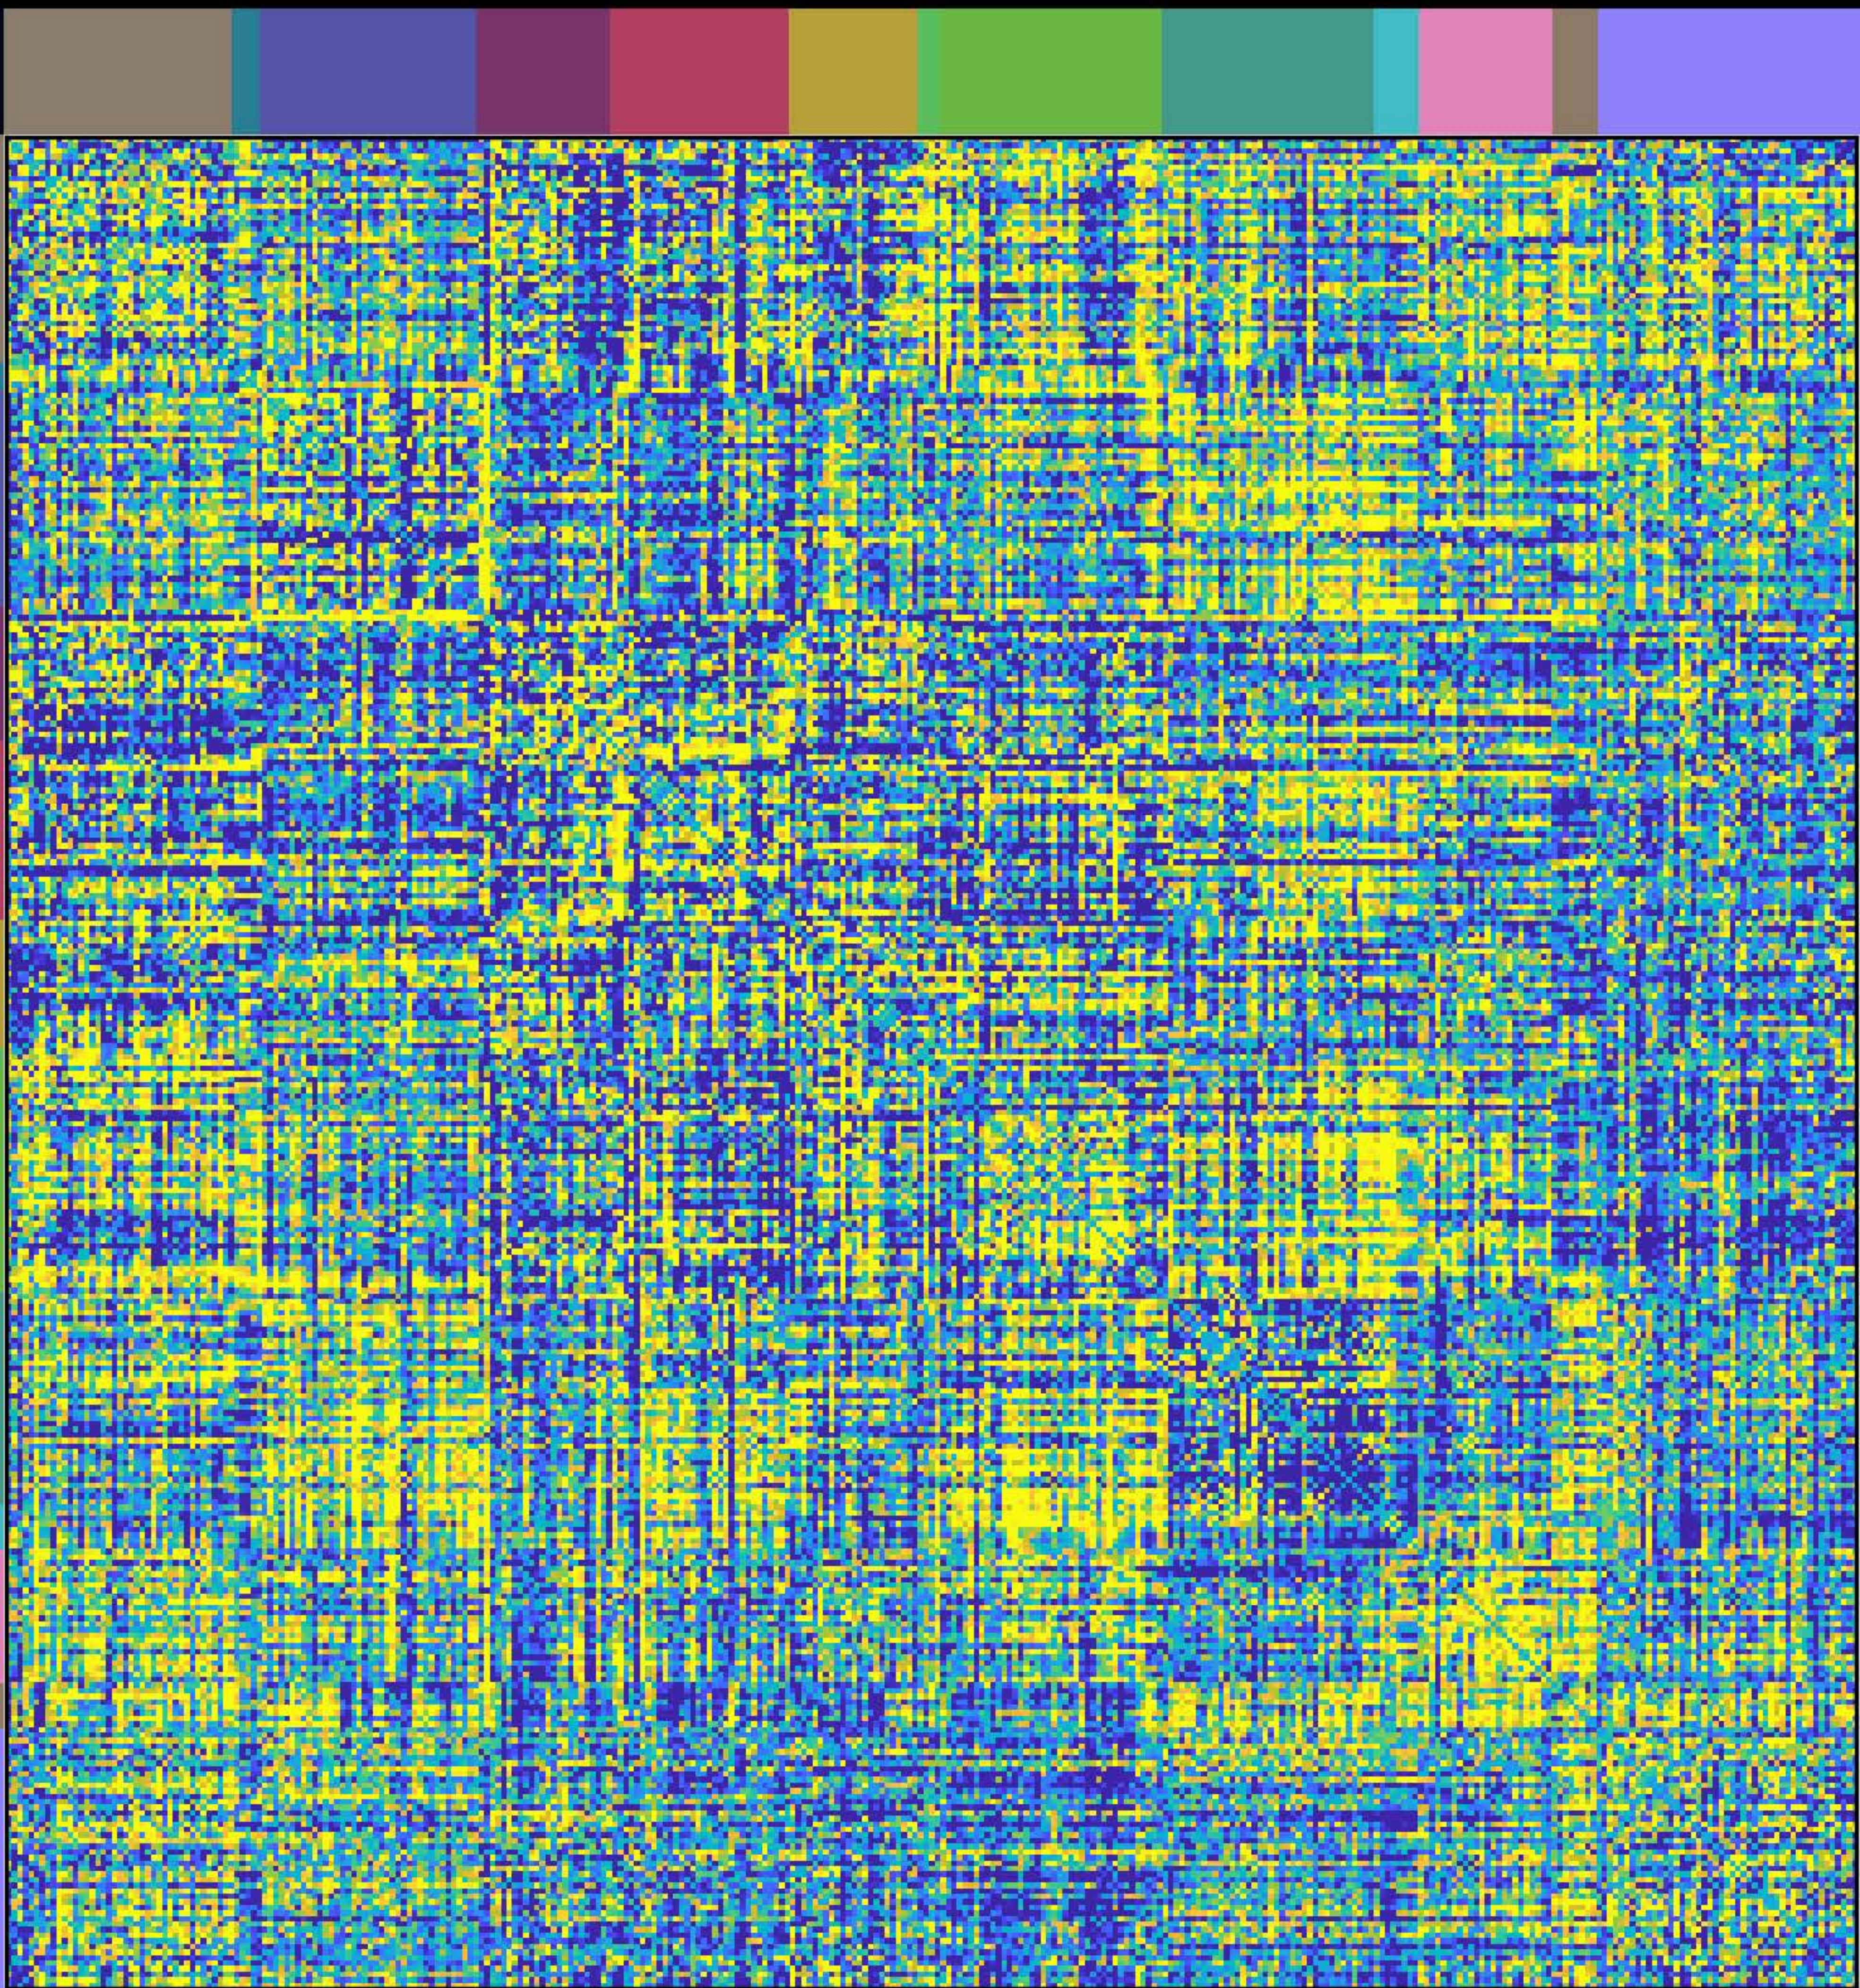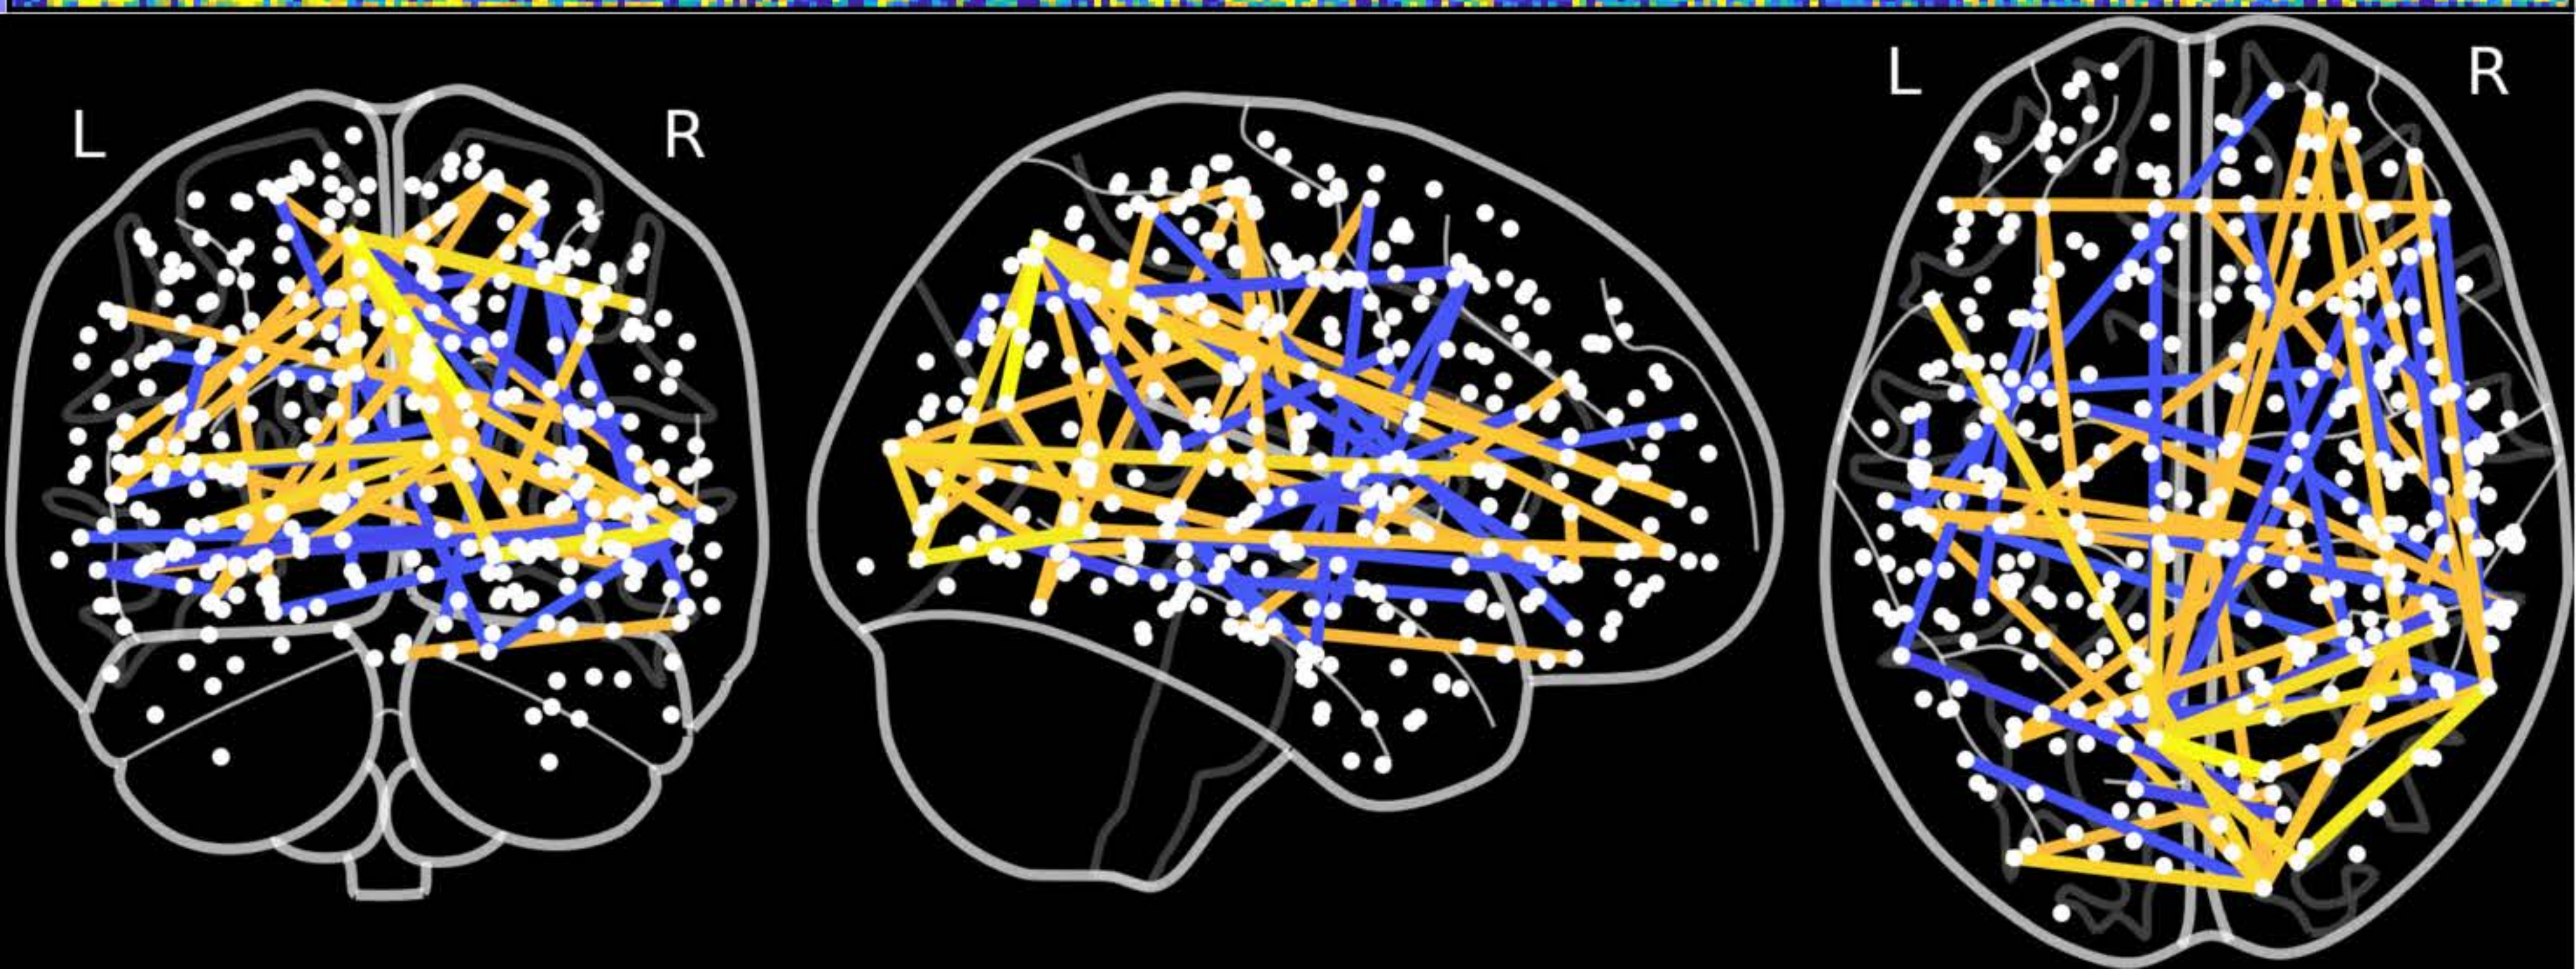



component\_57

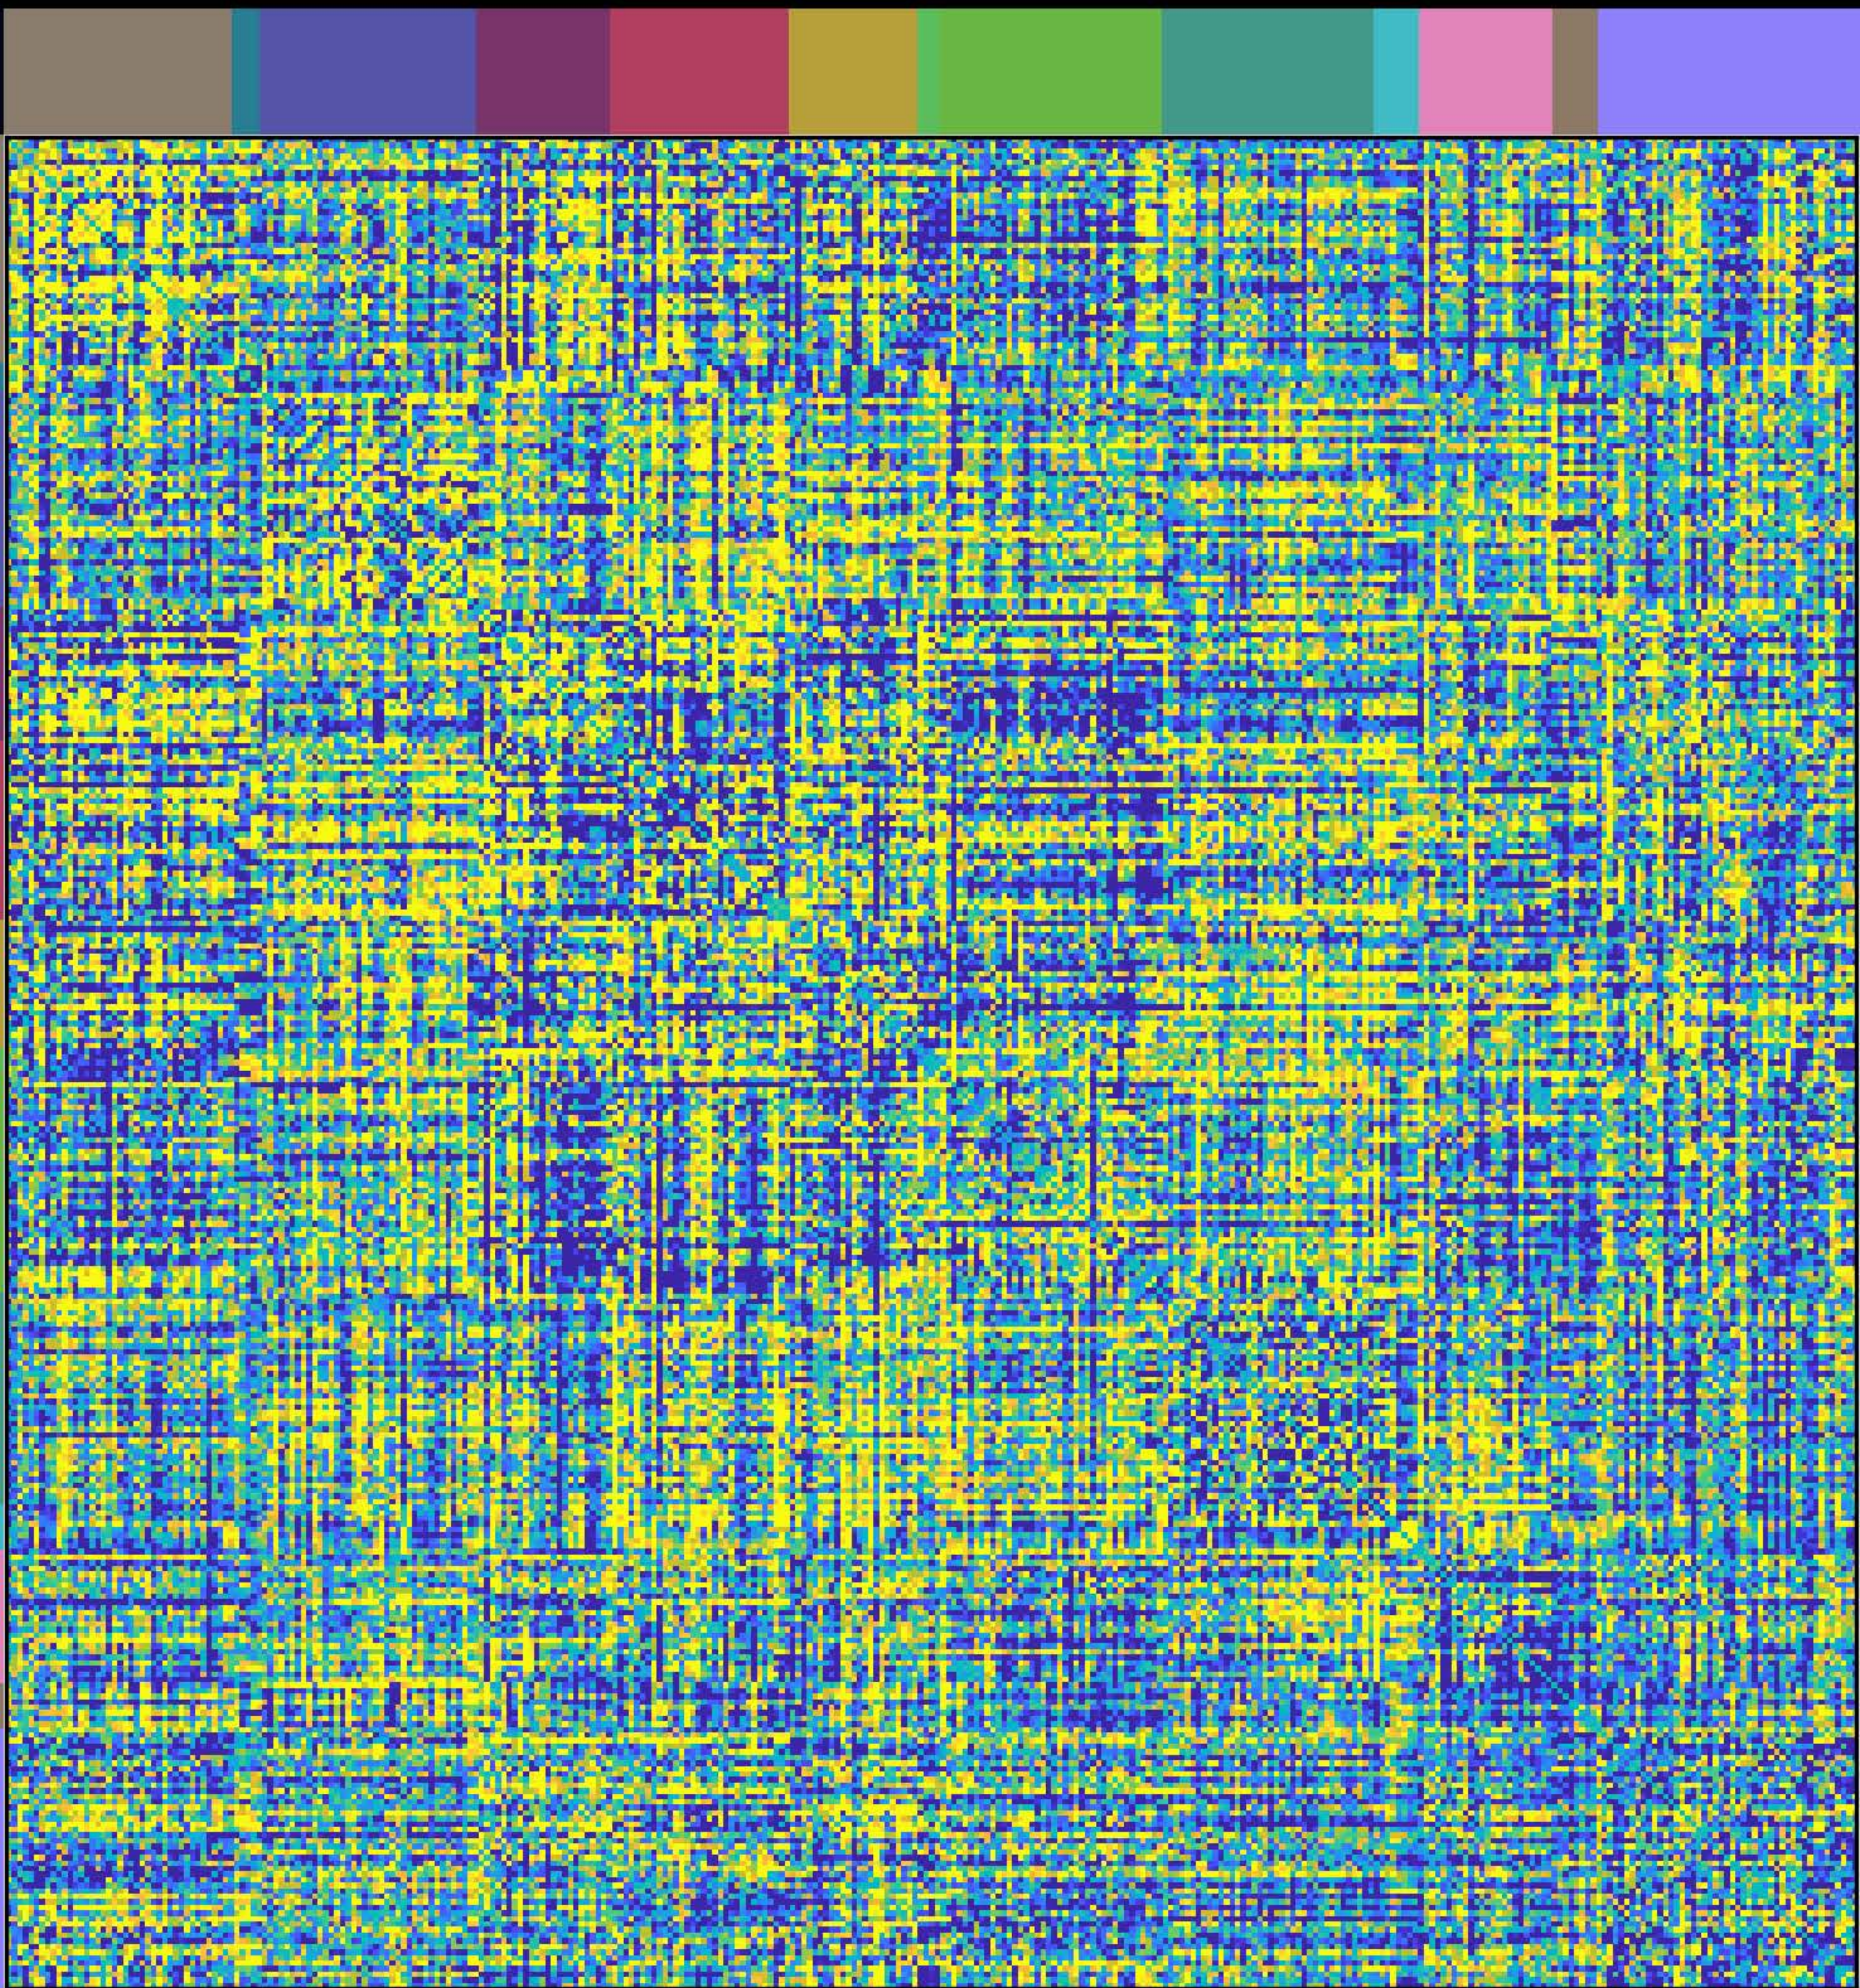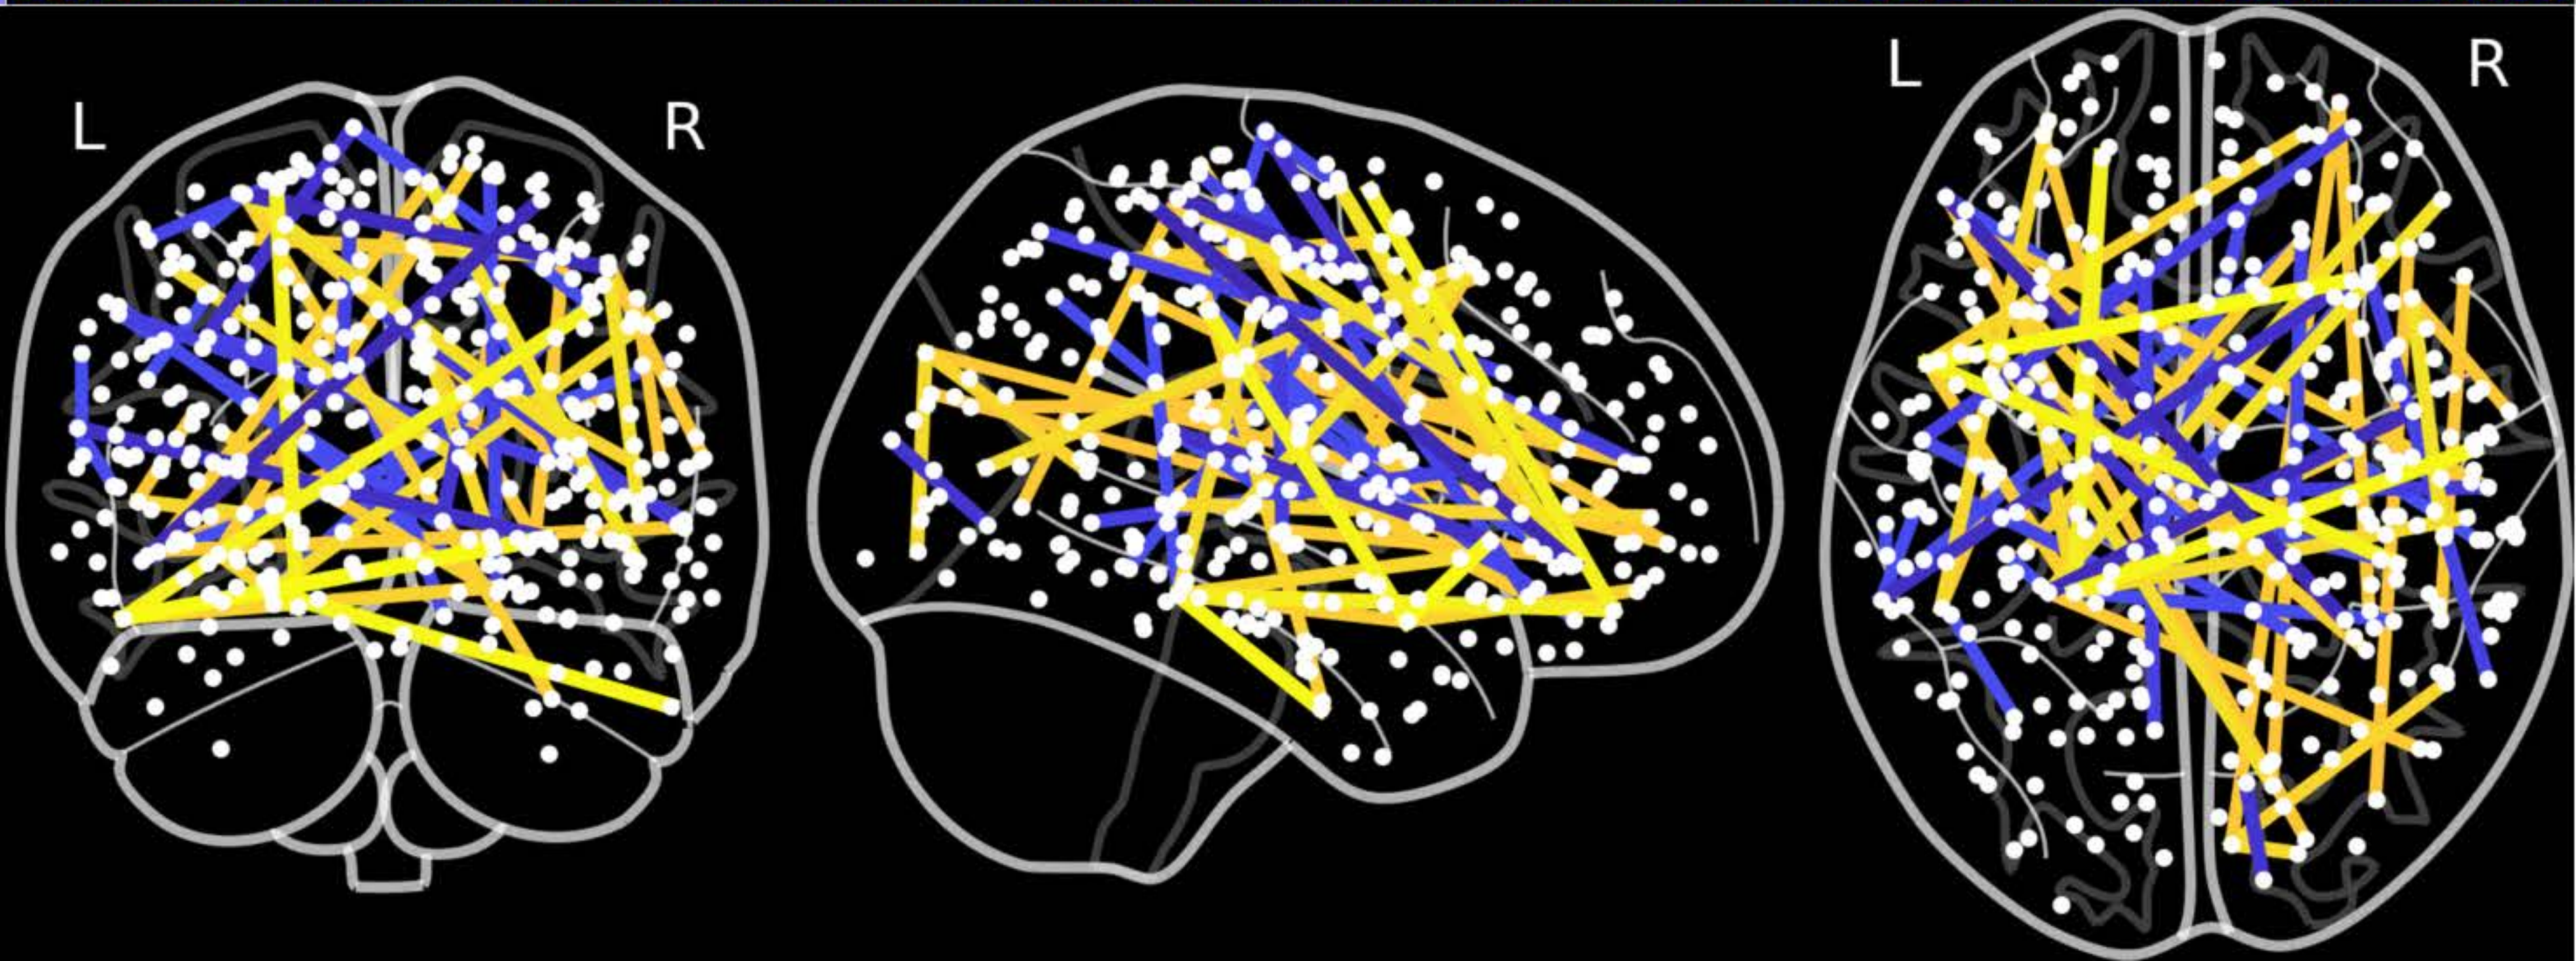



component\_58

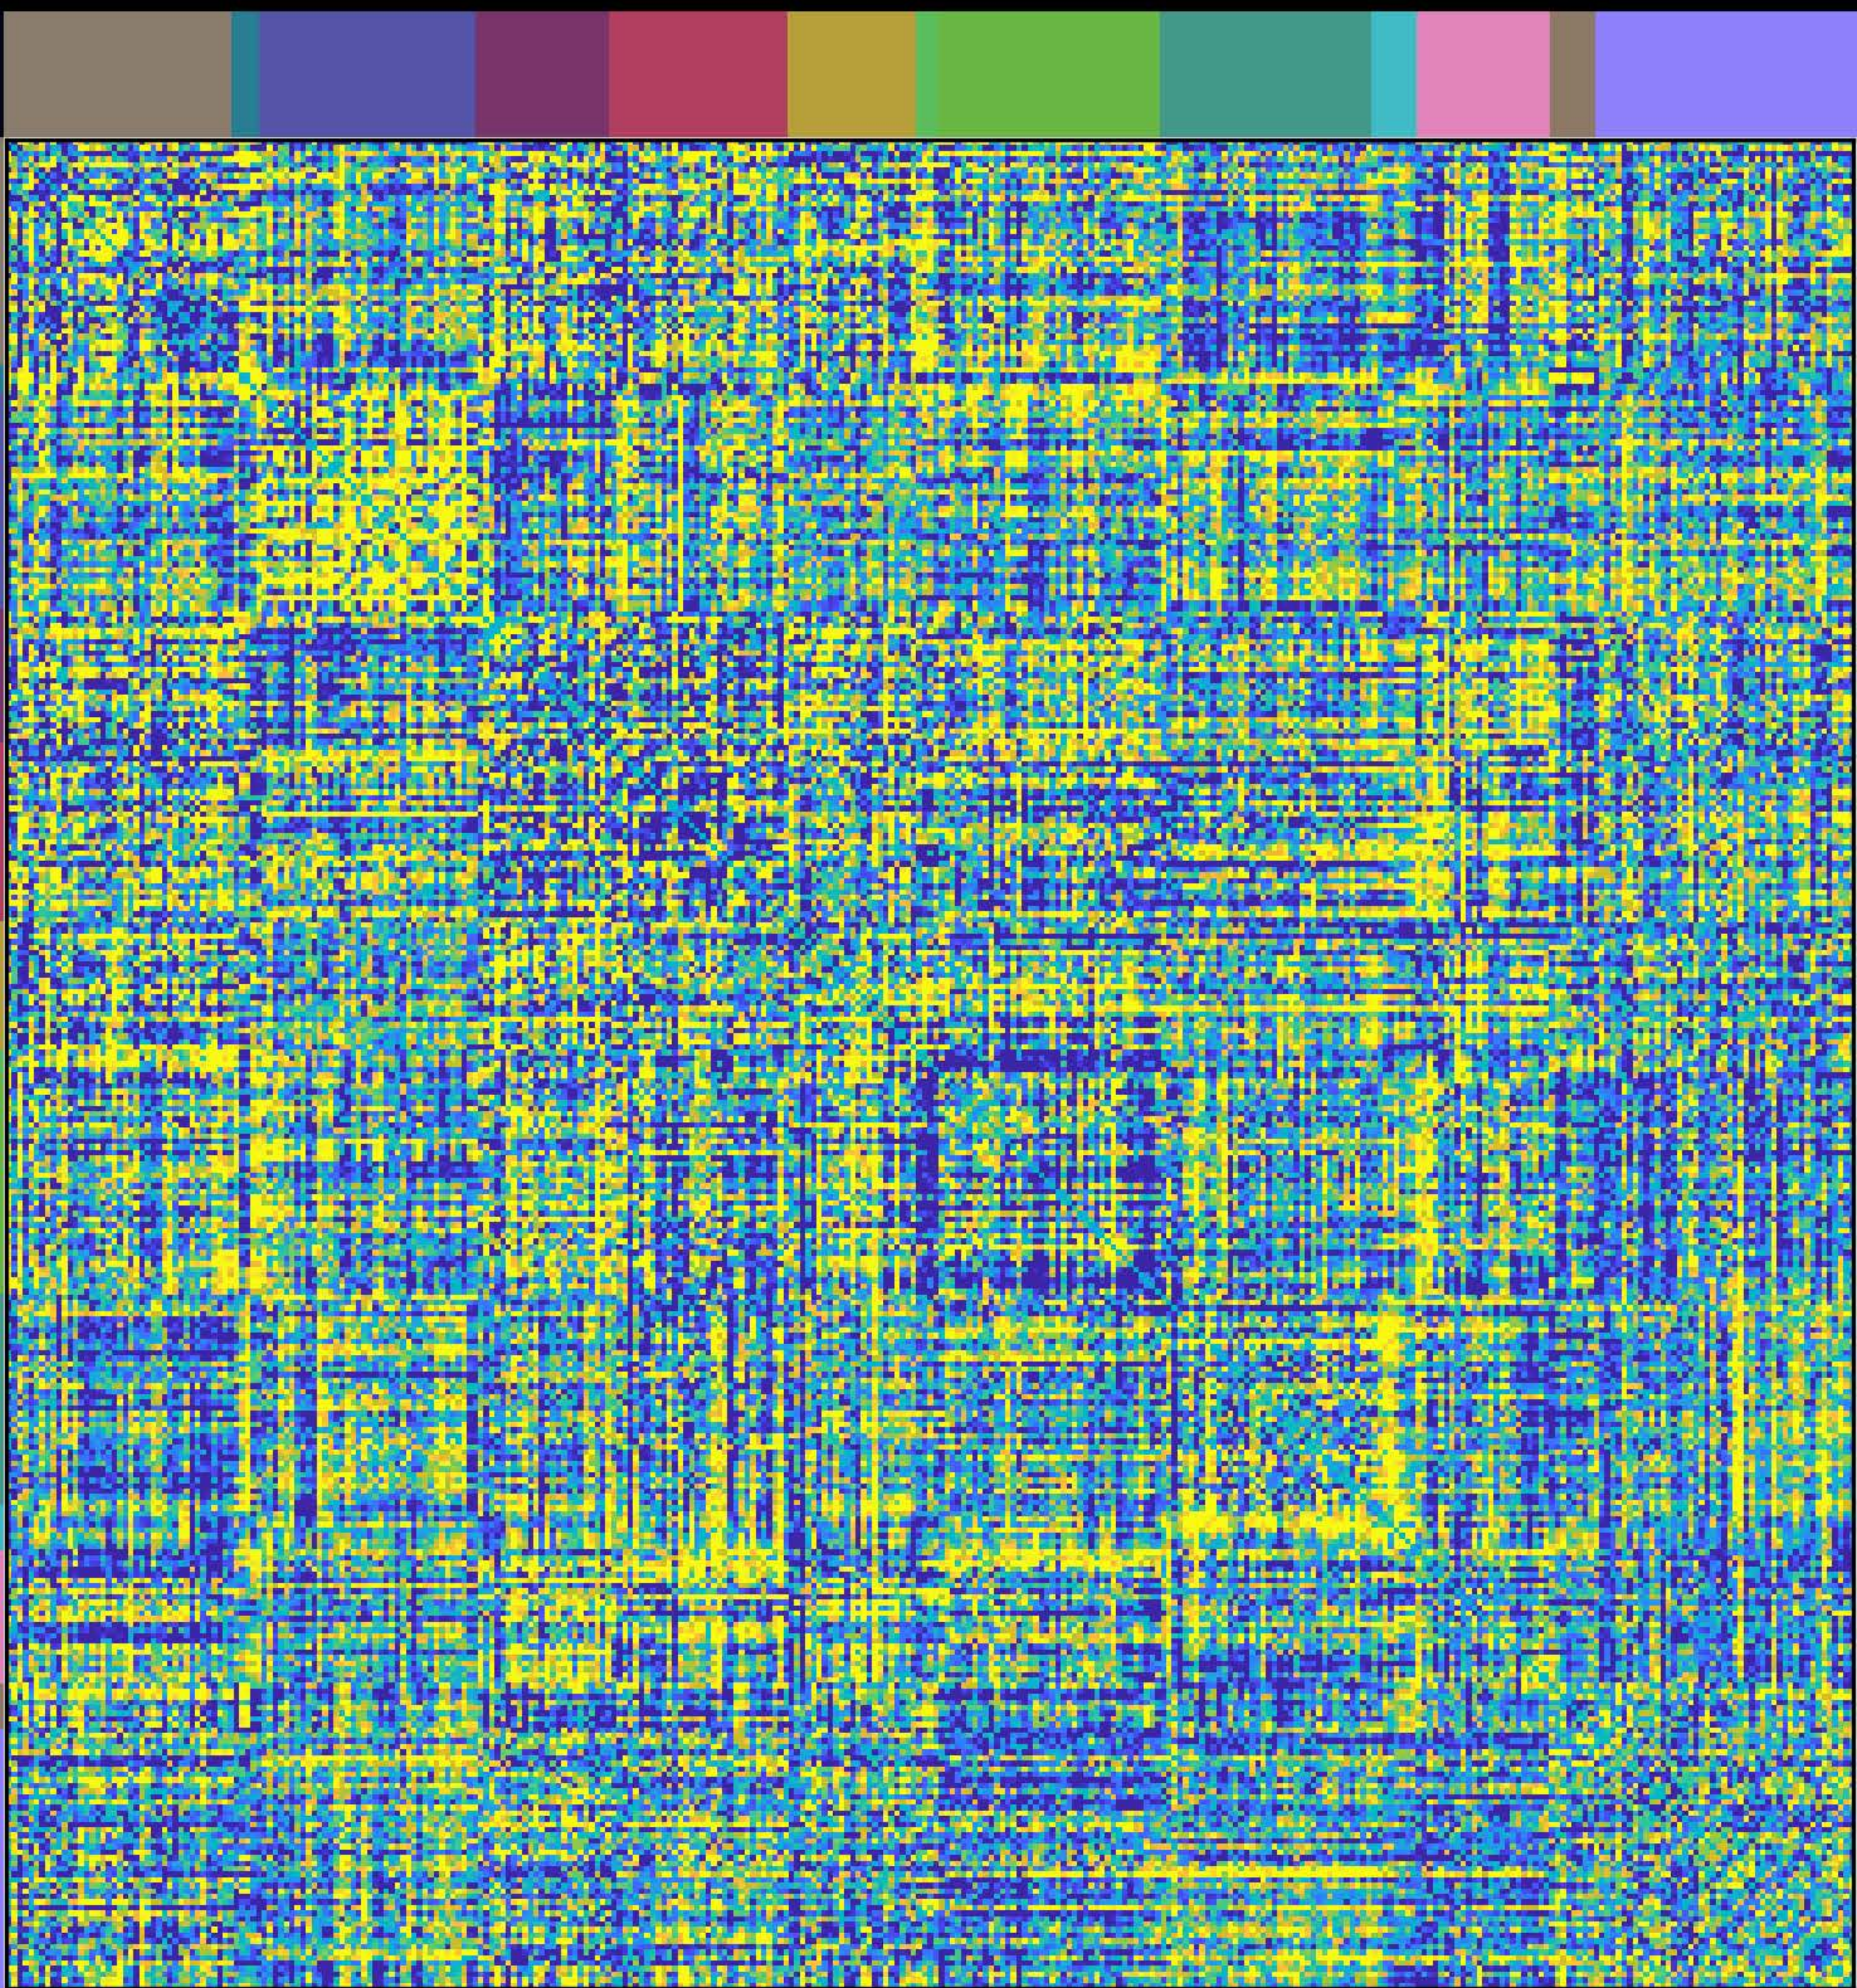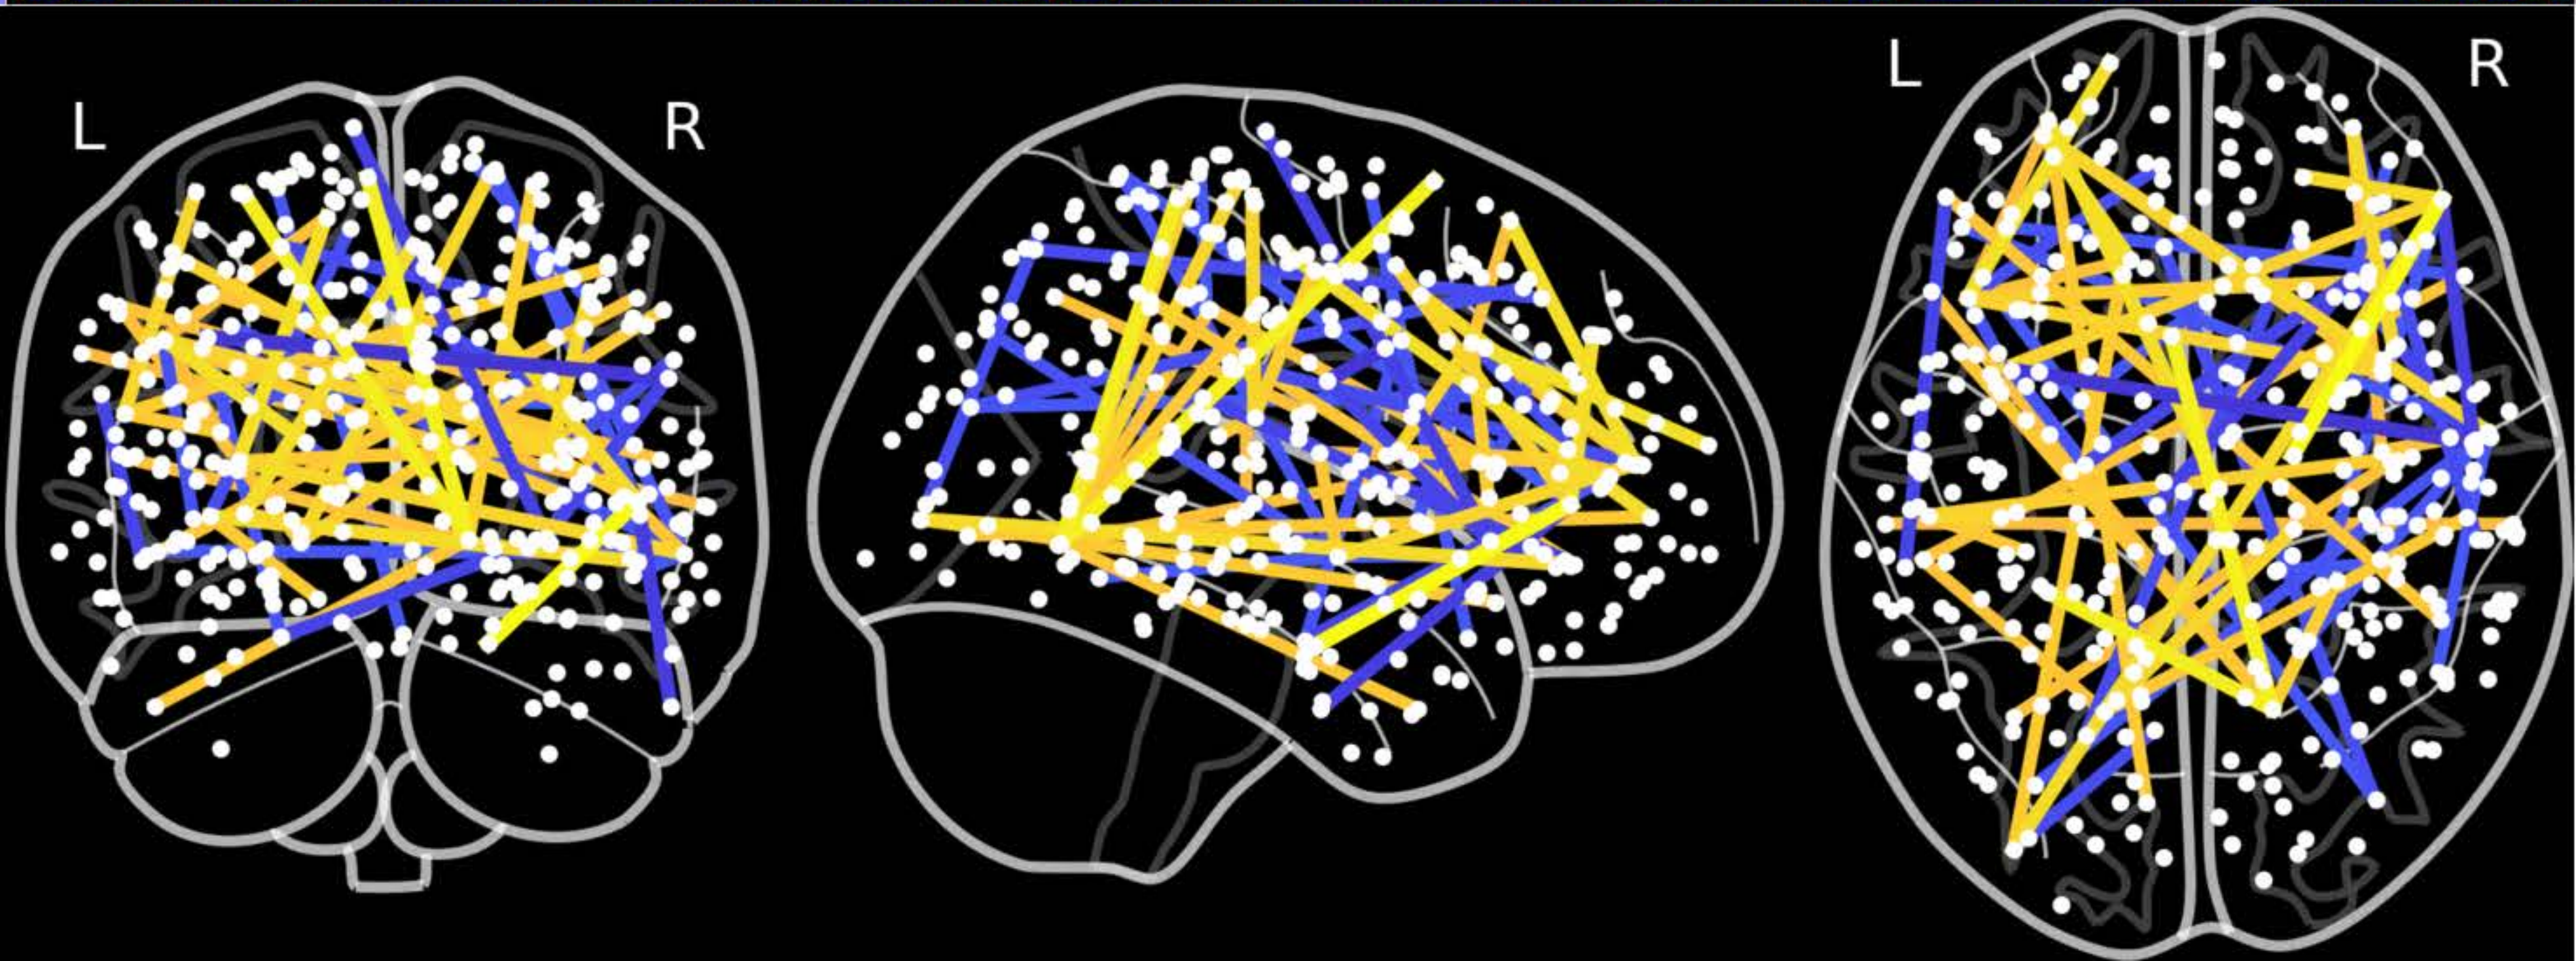



component\_59

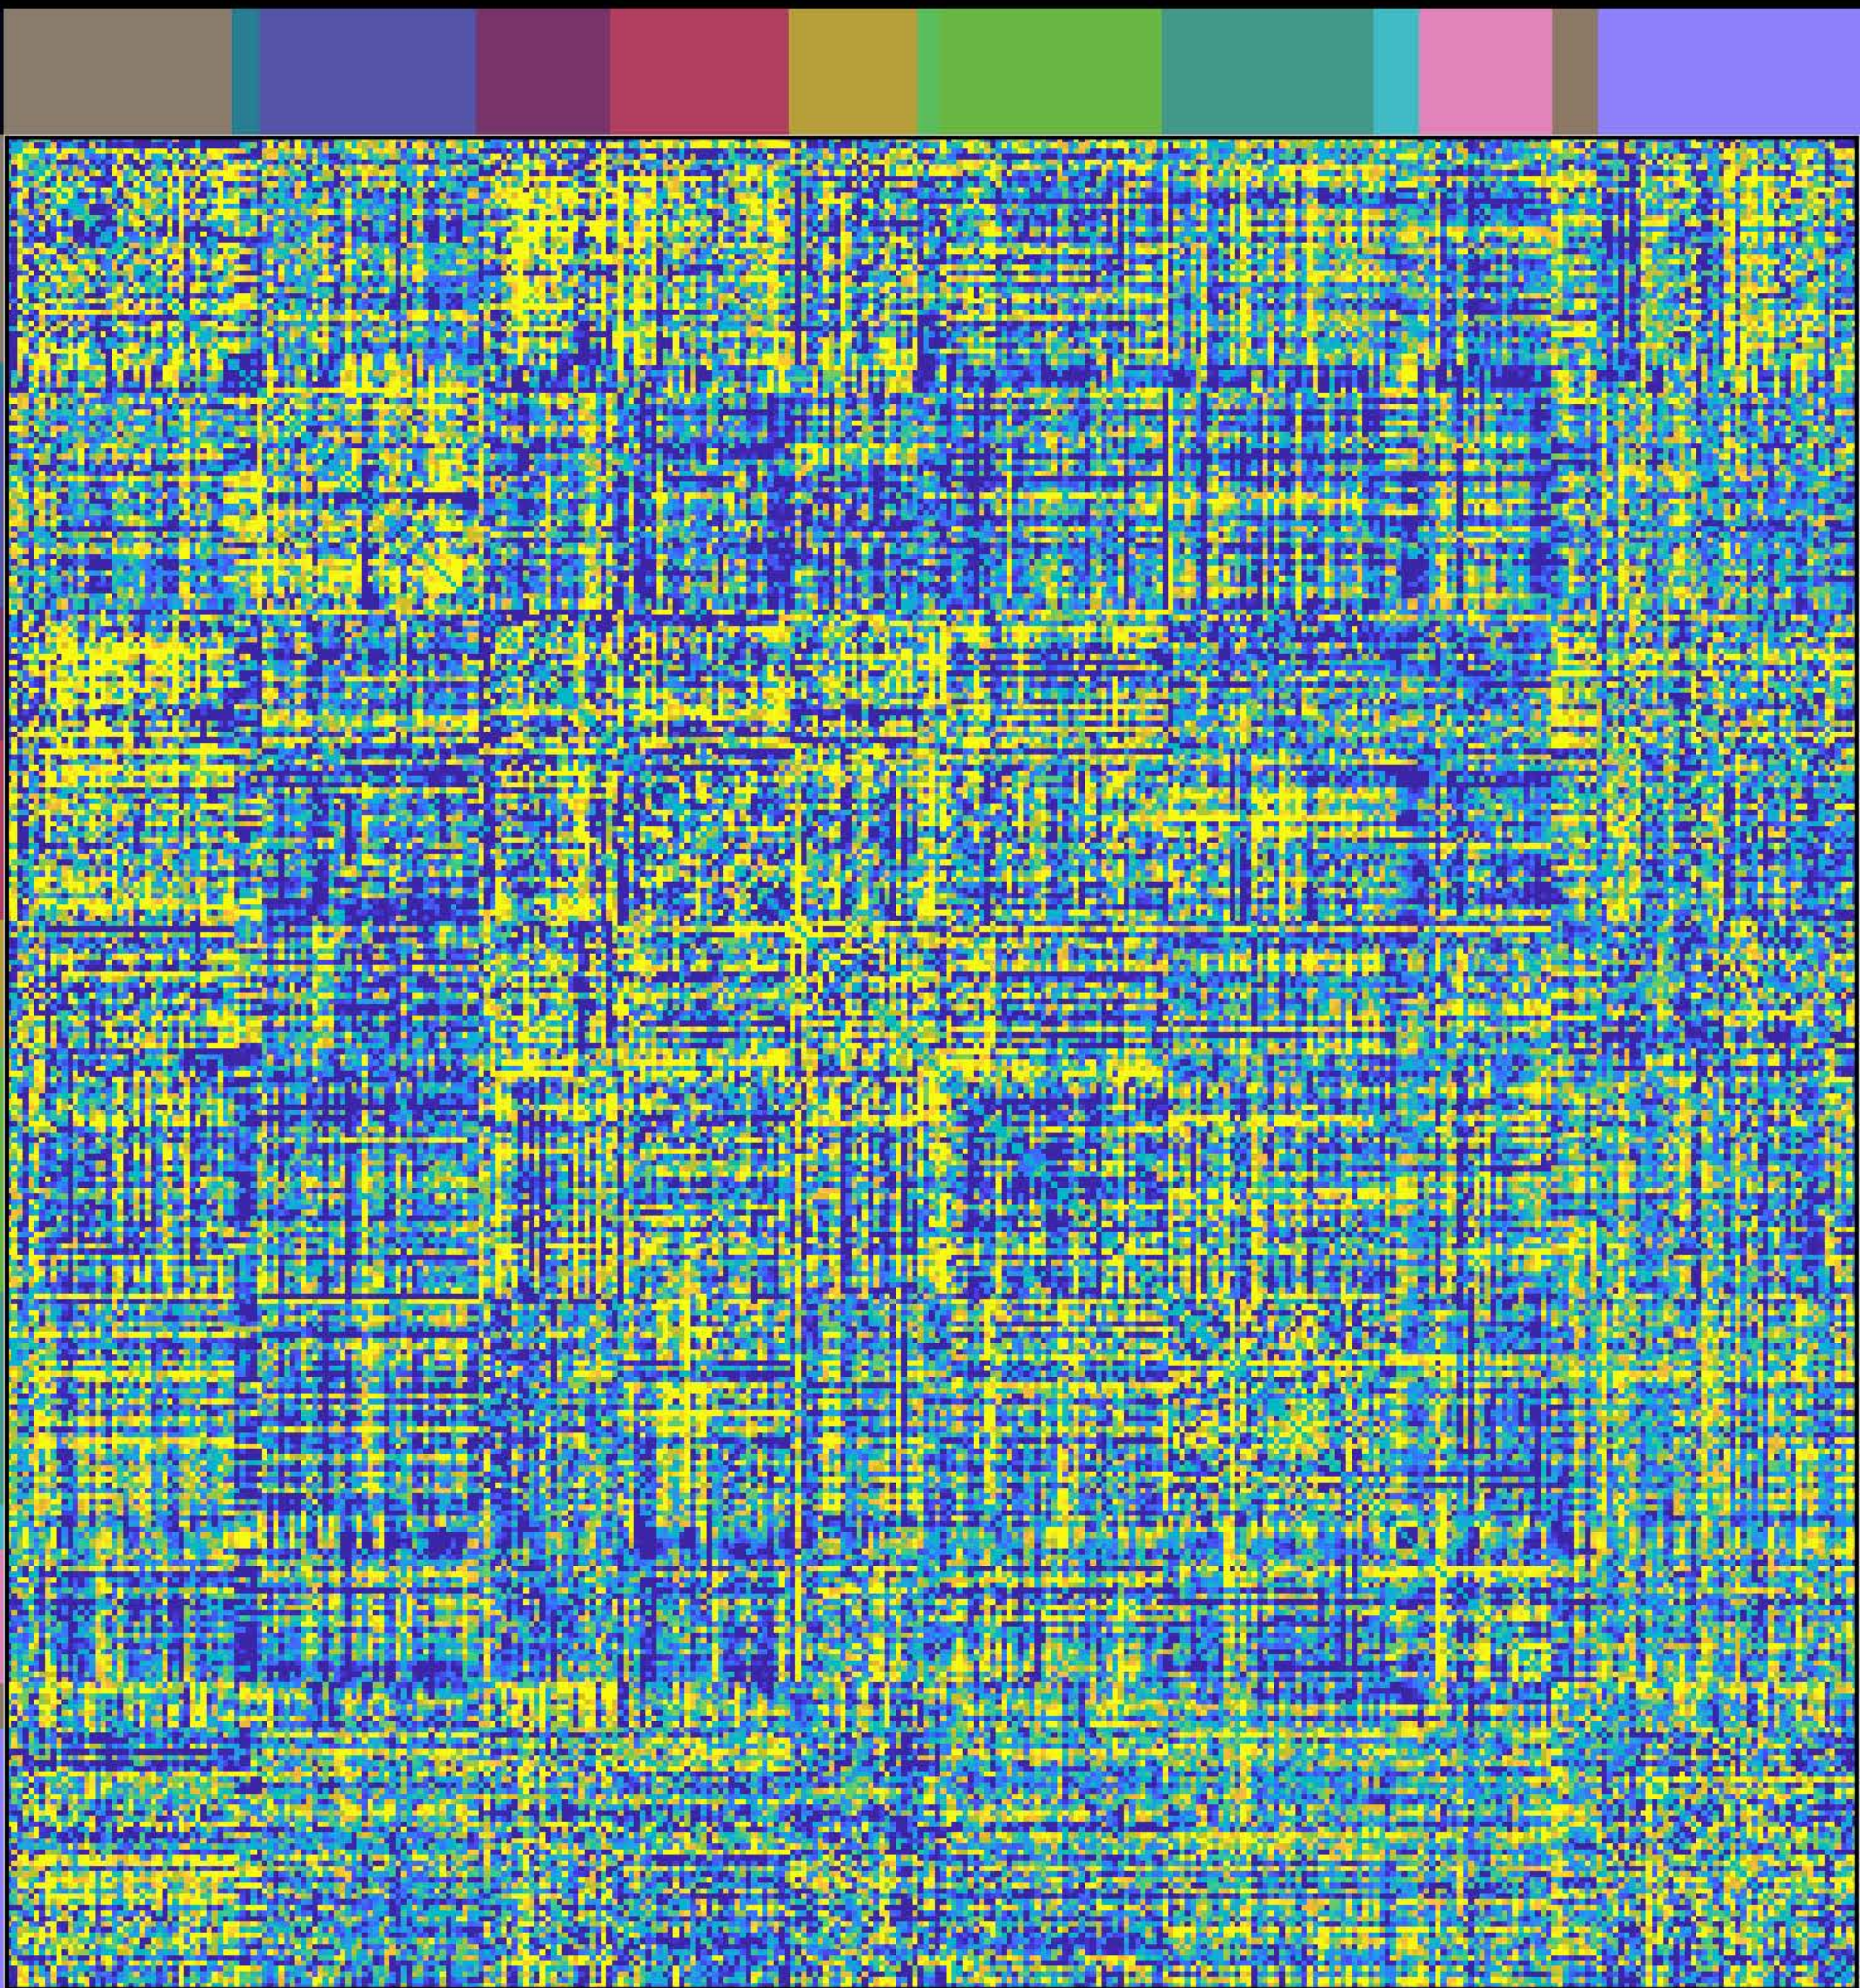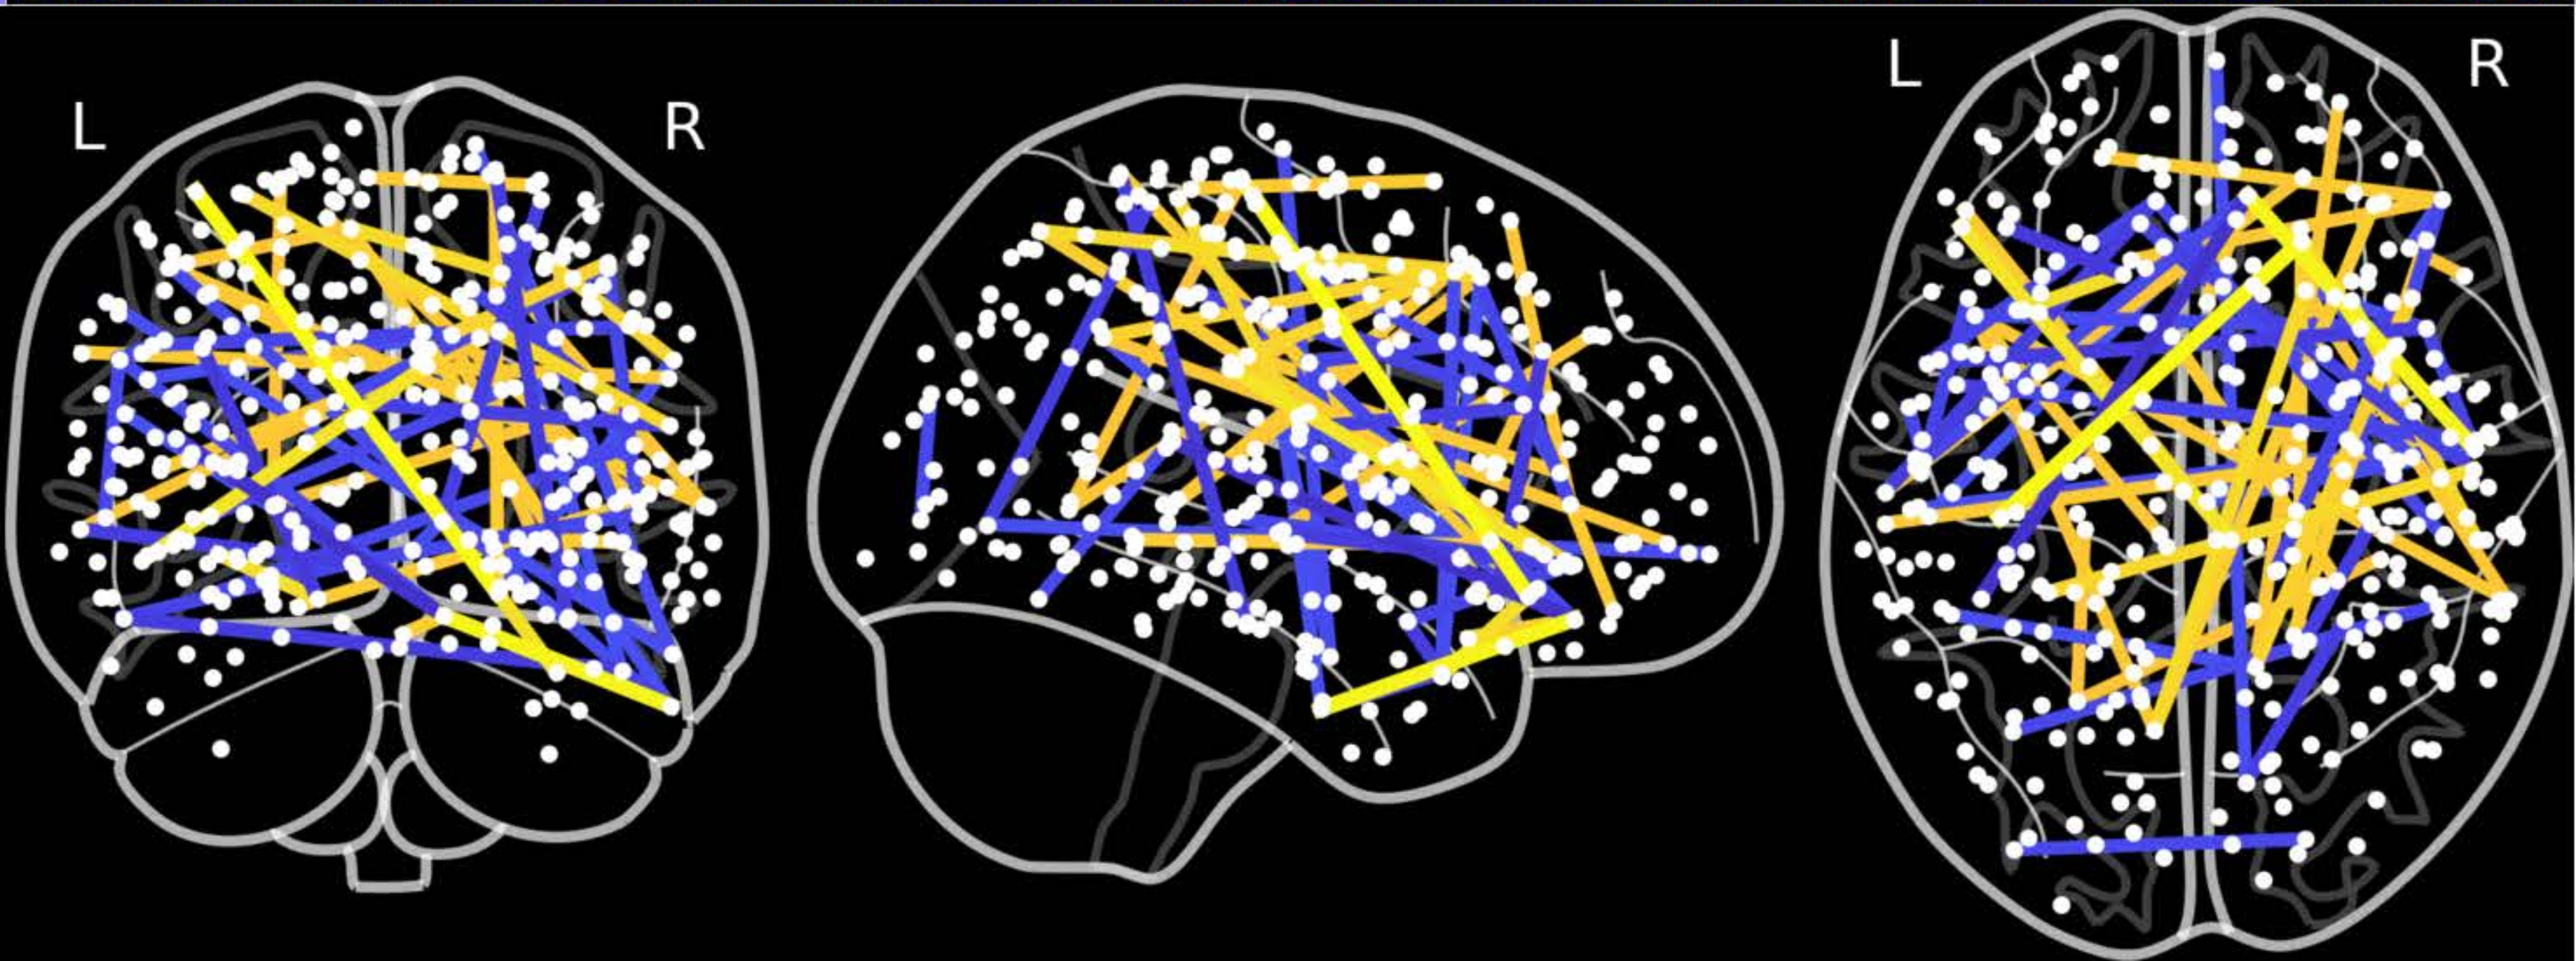



component\_60

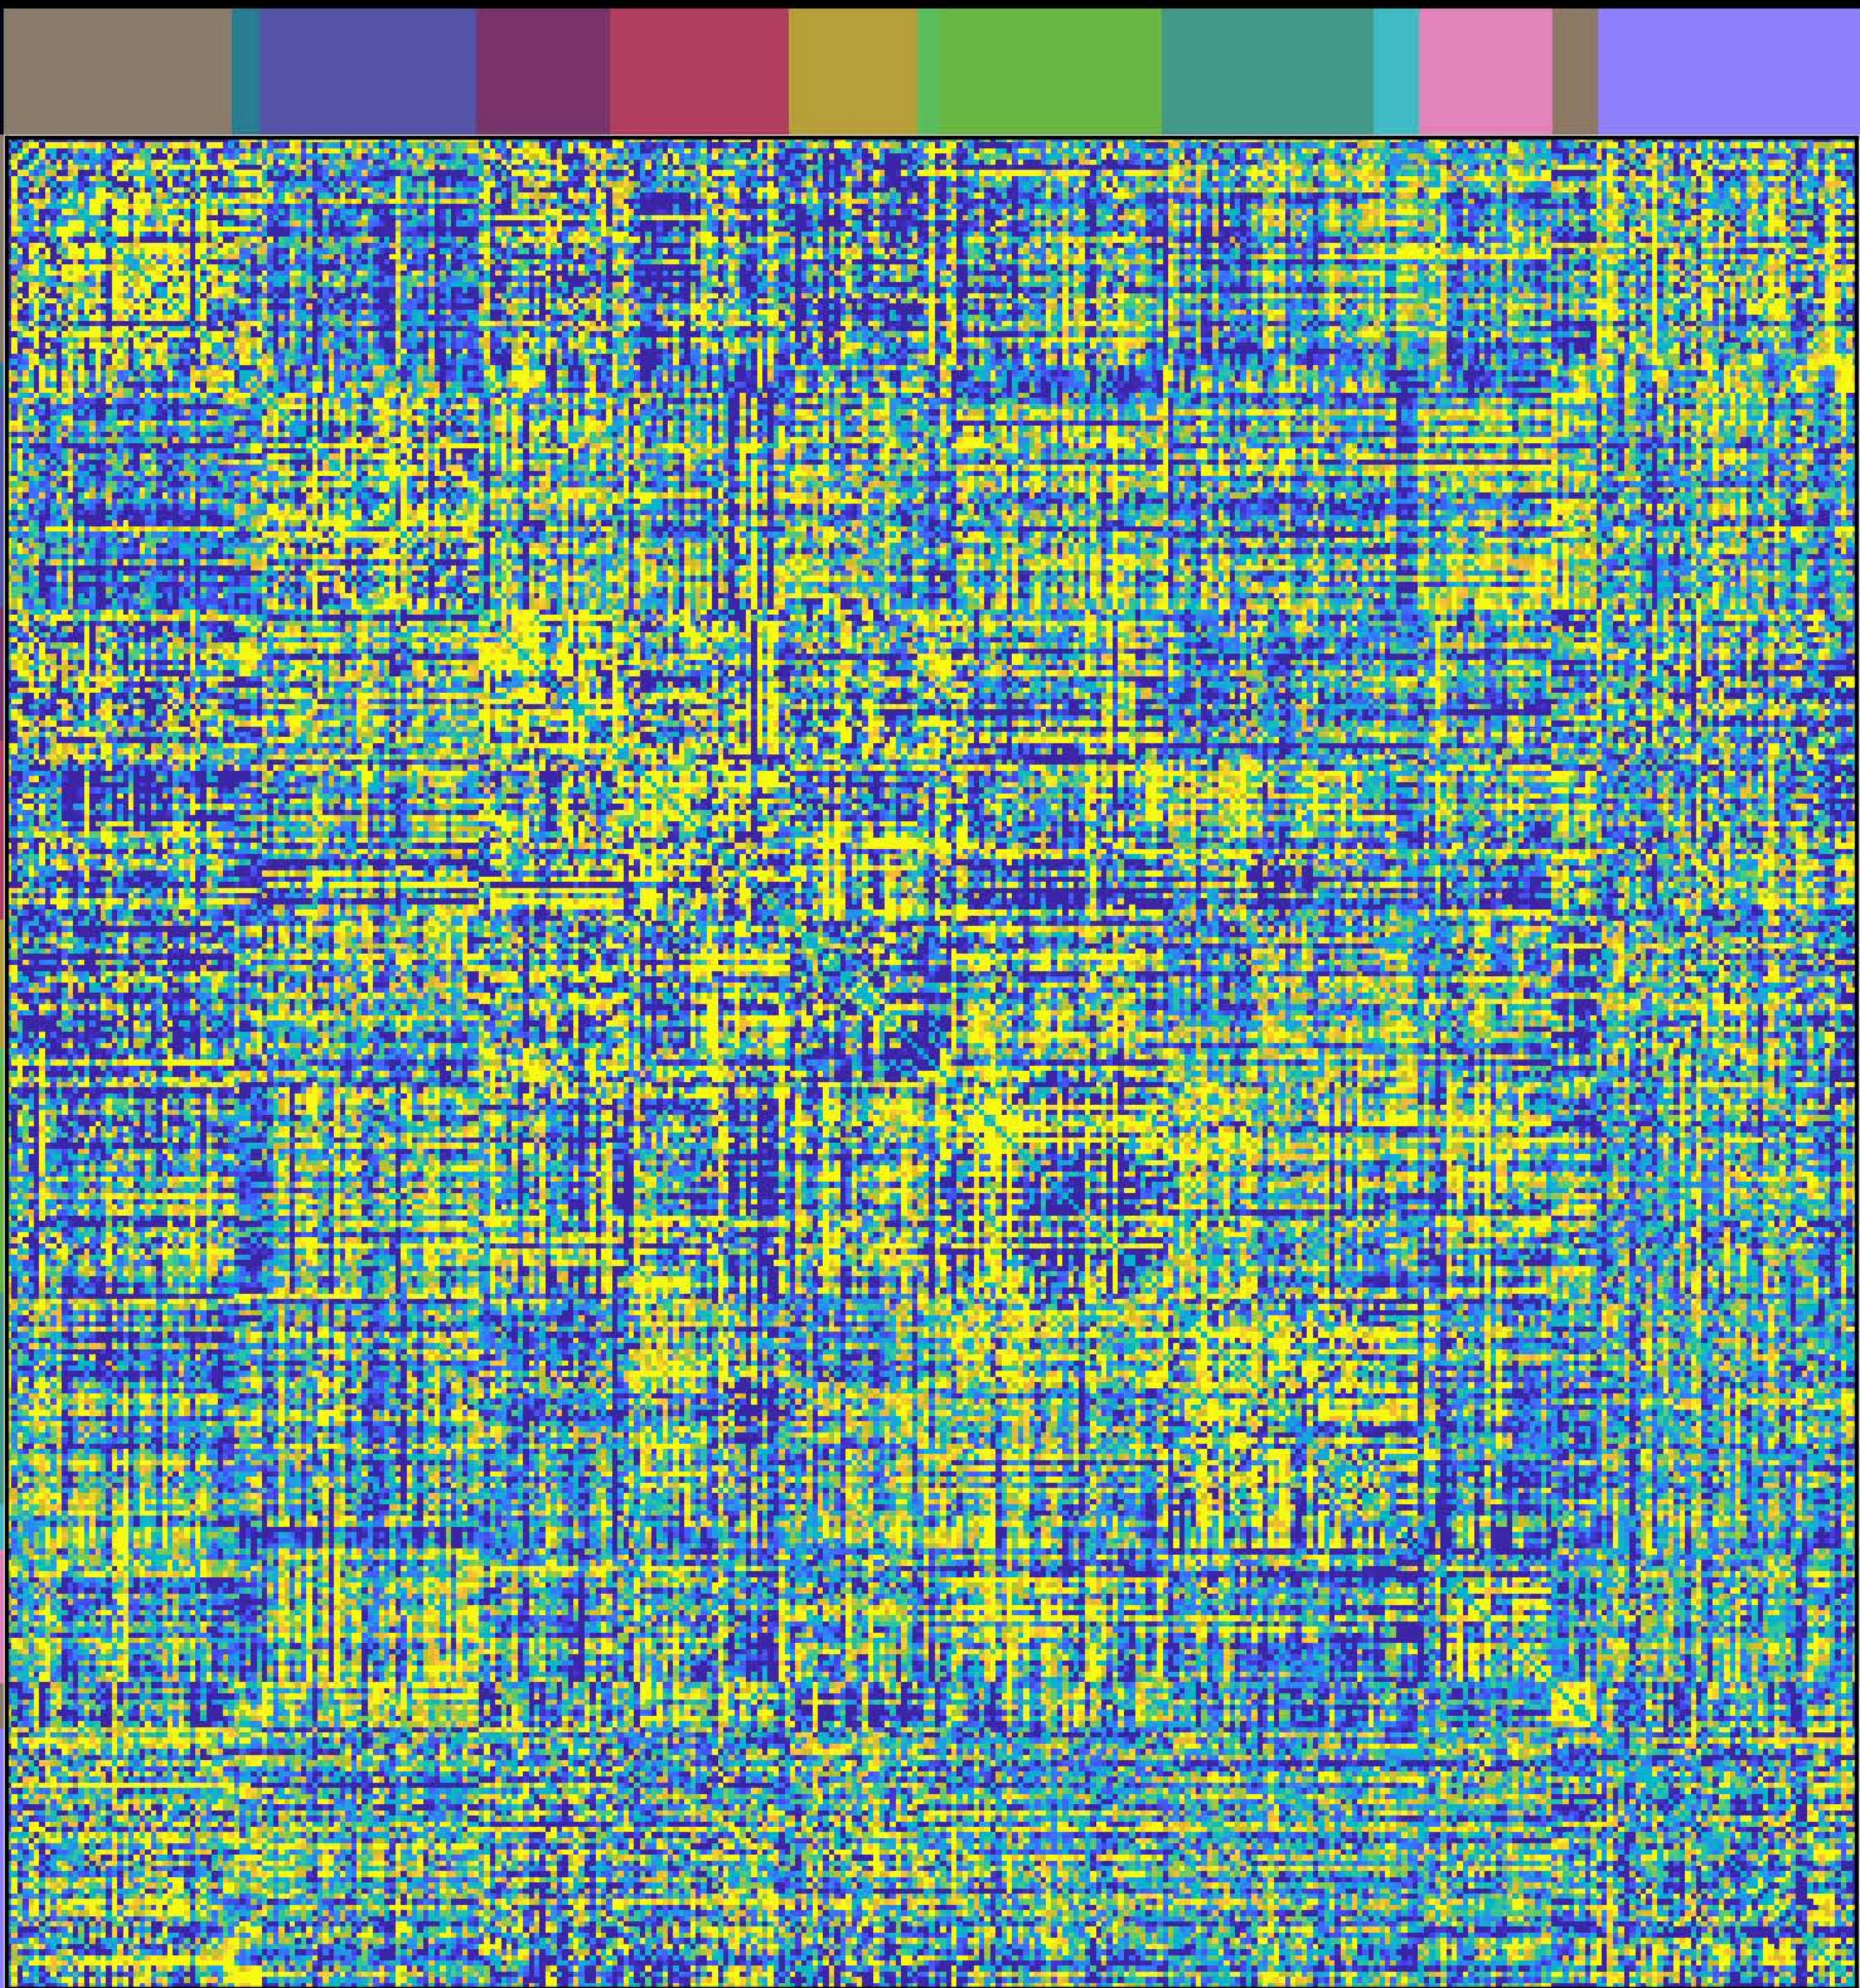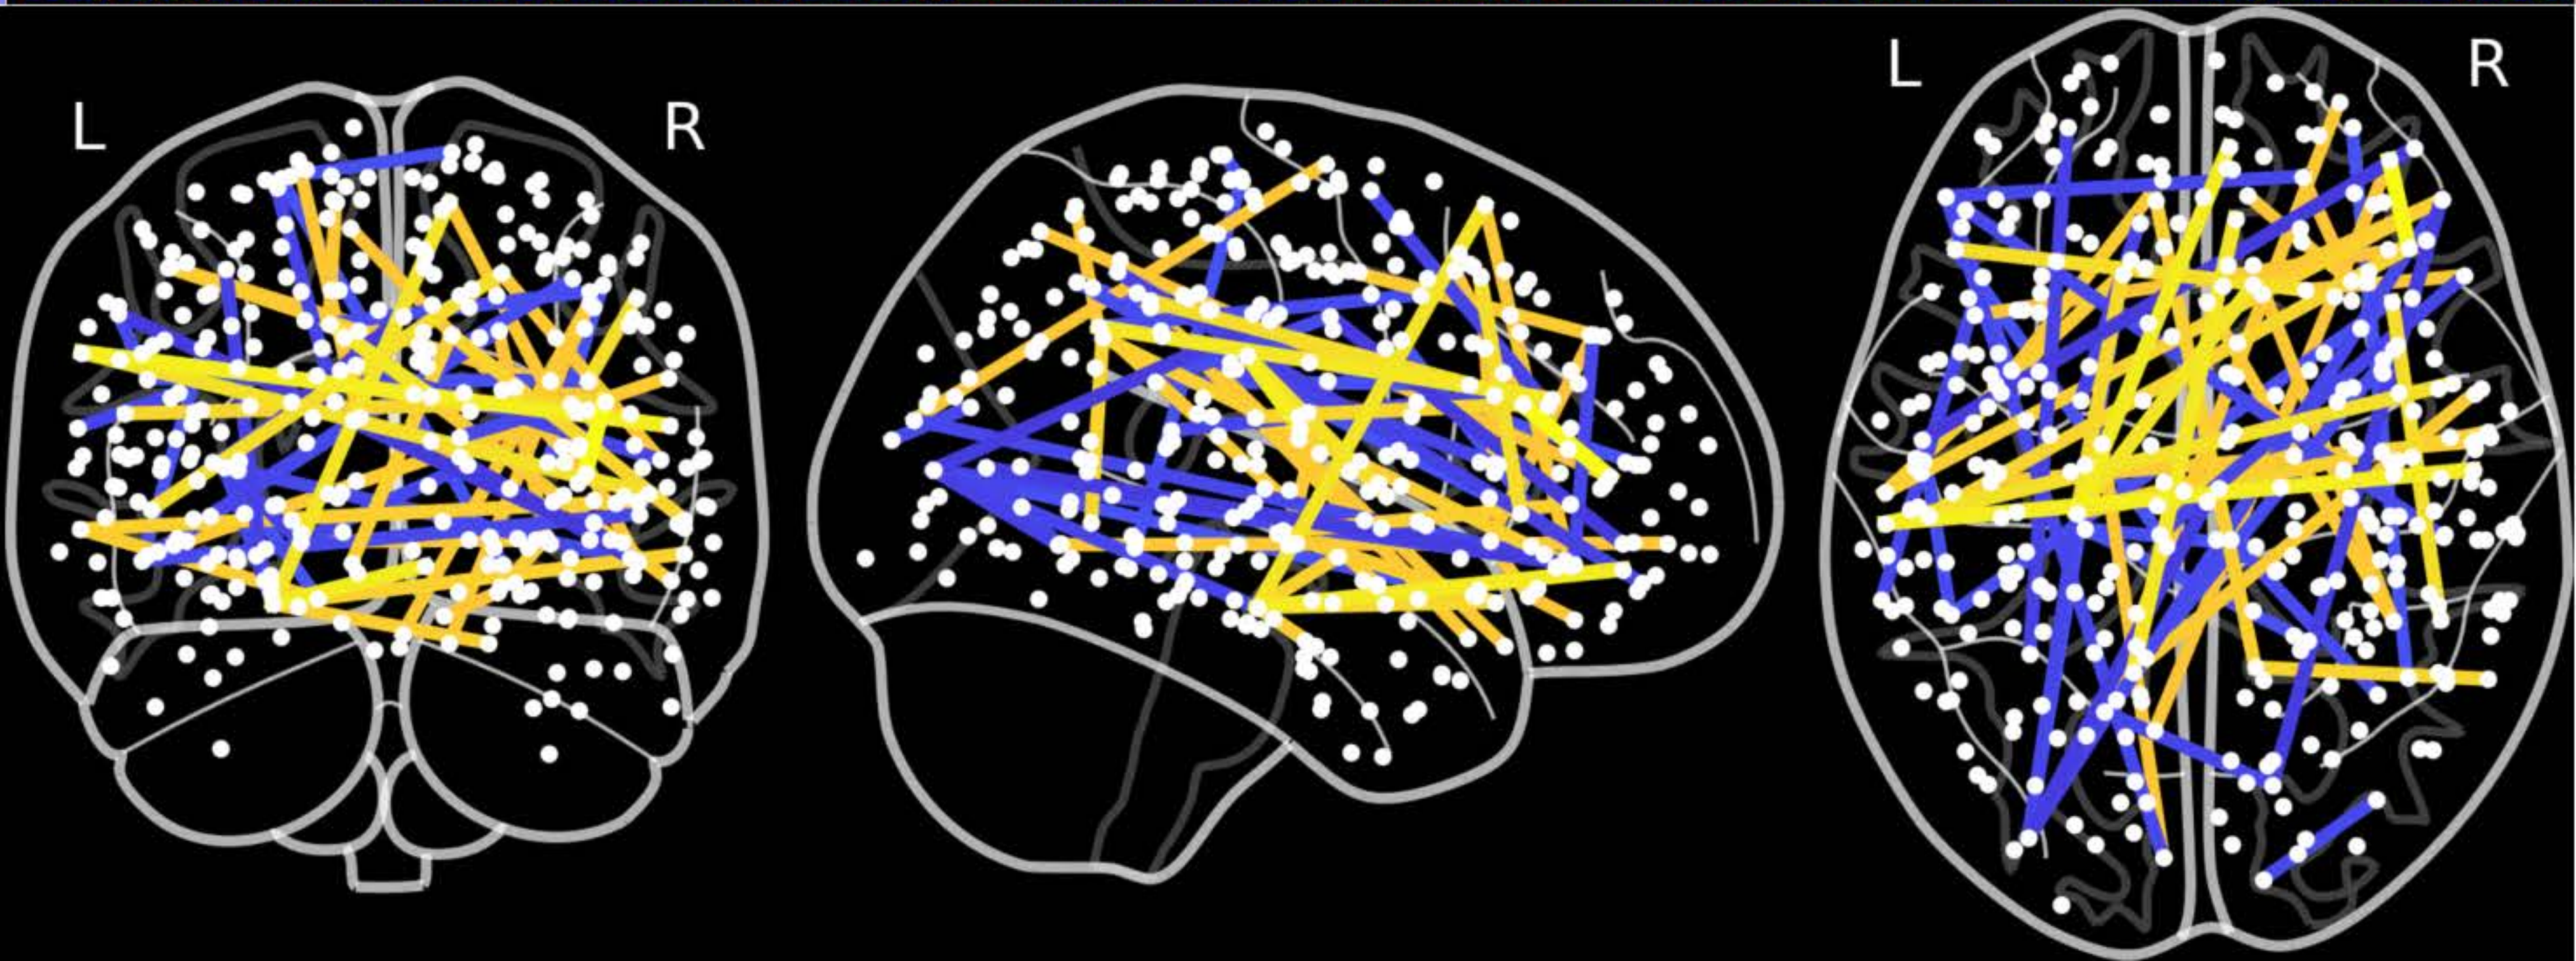



component\_61

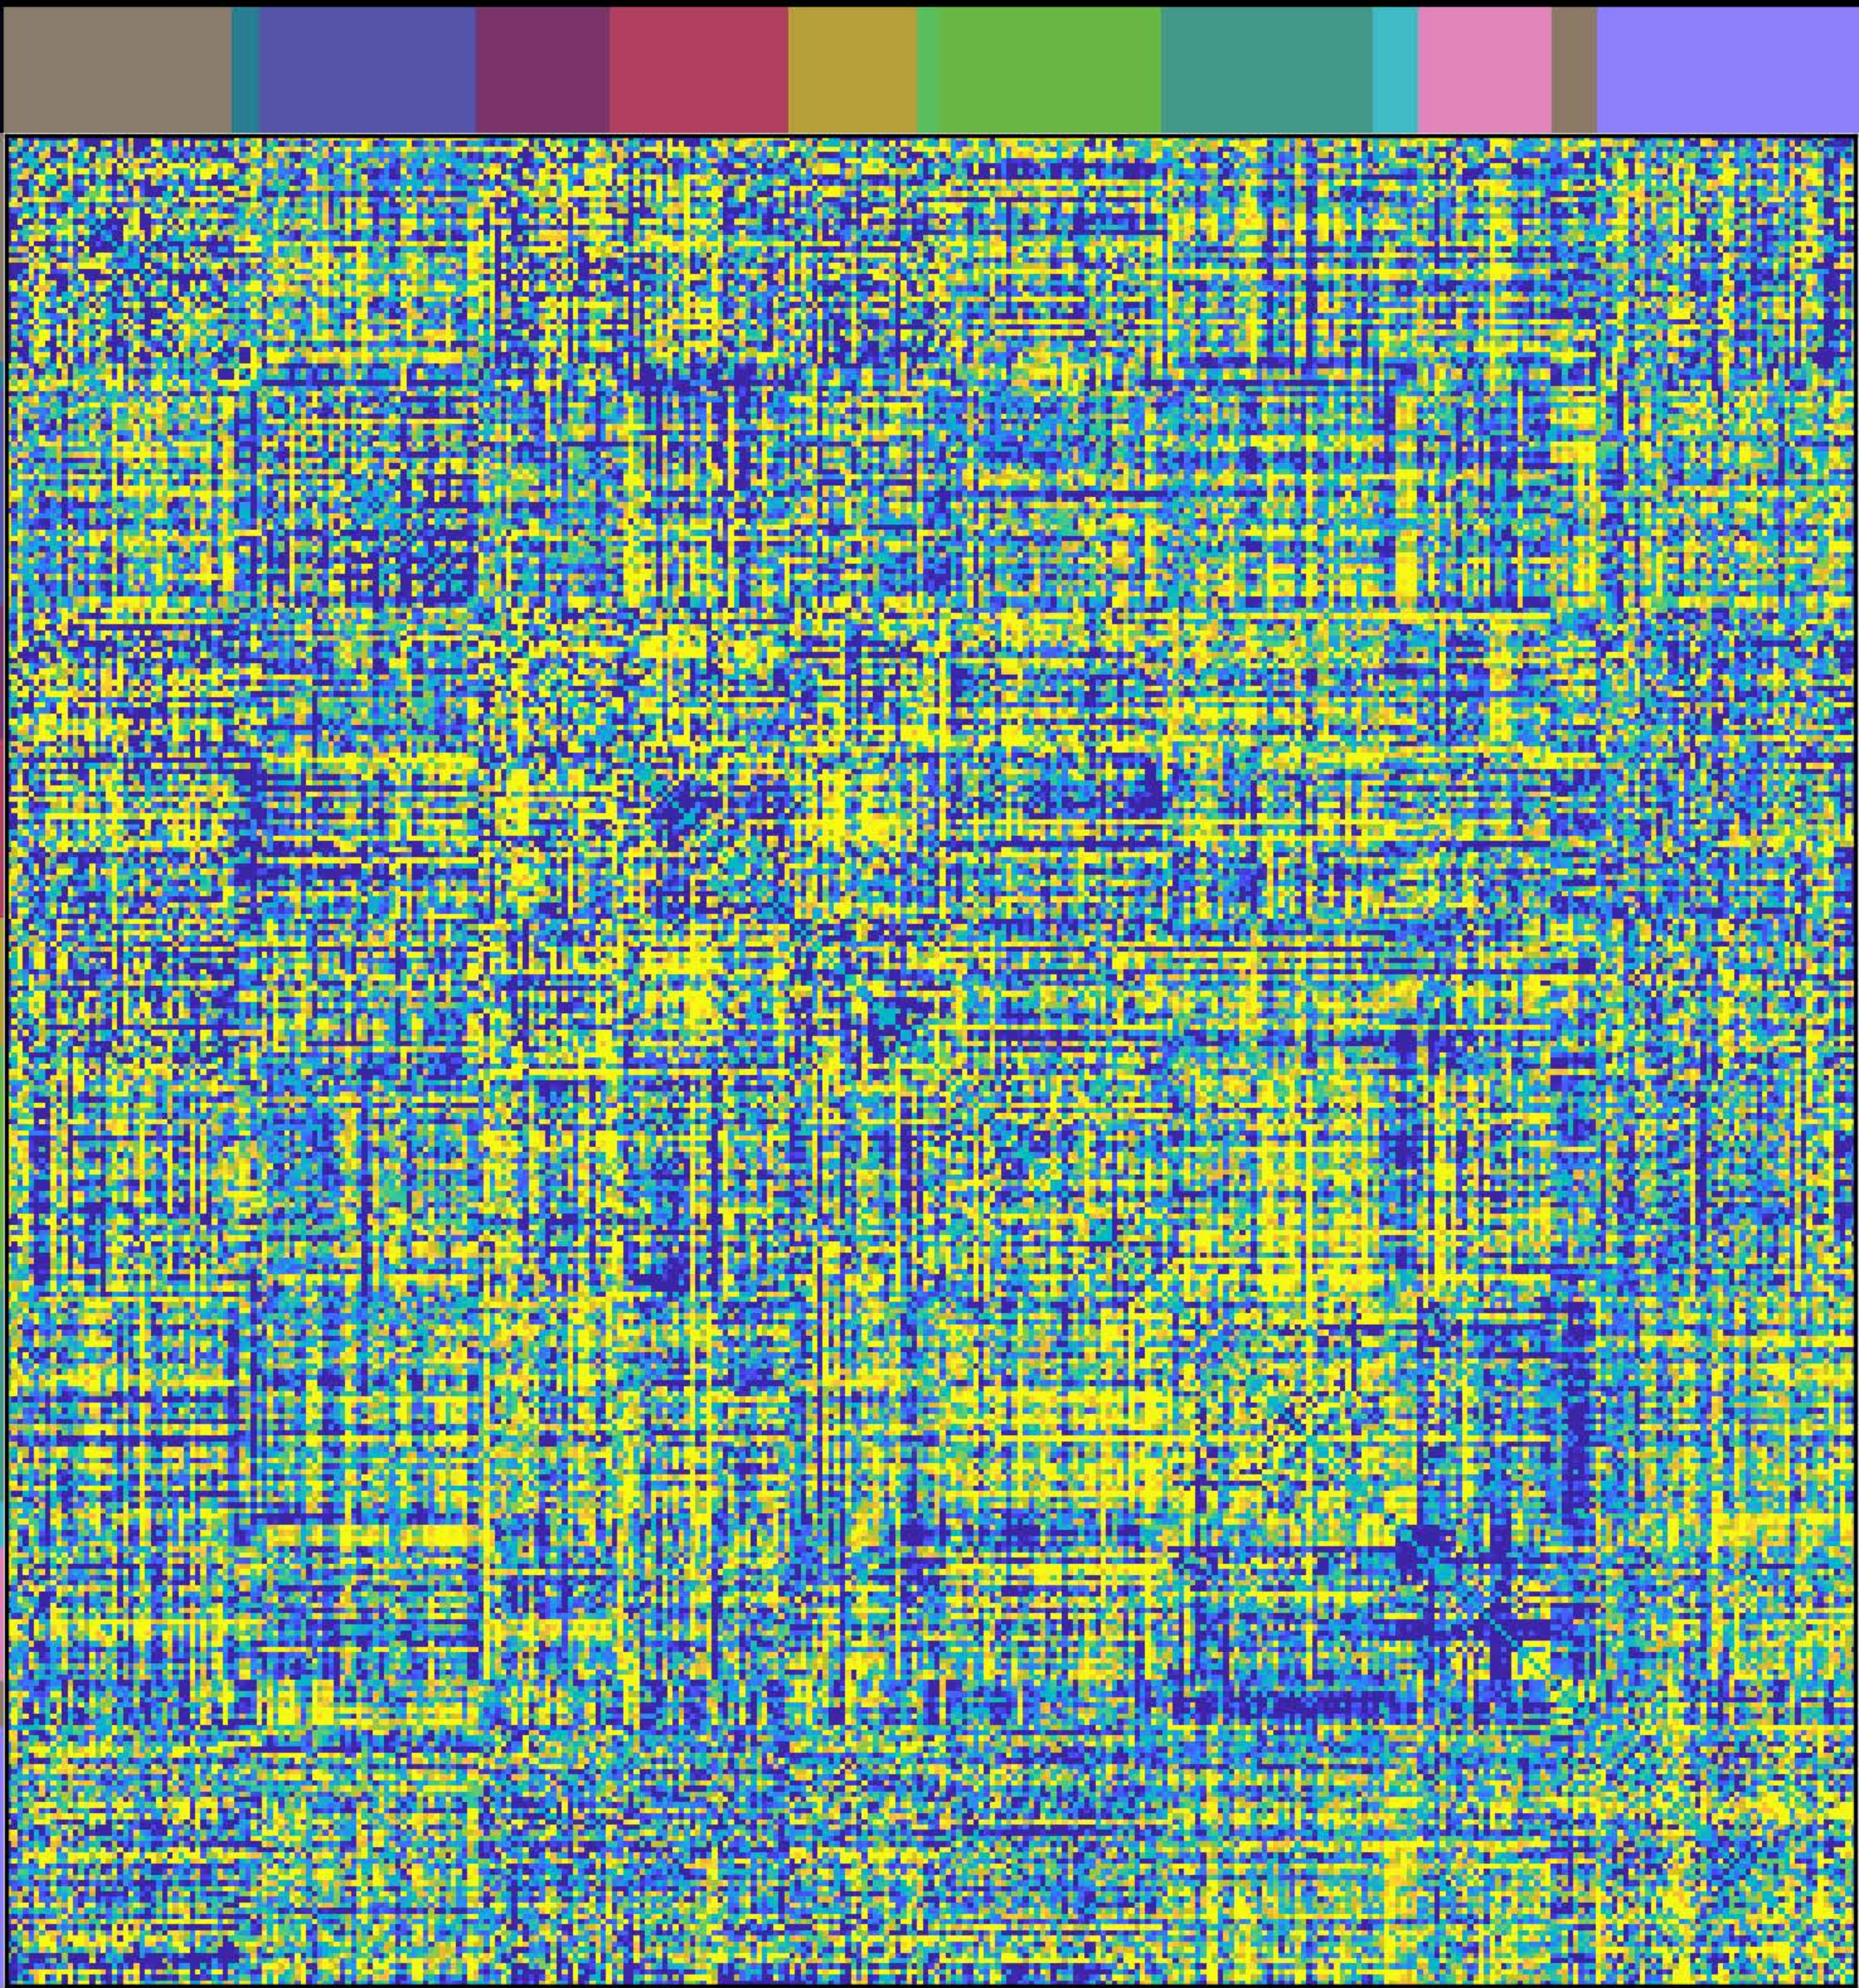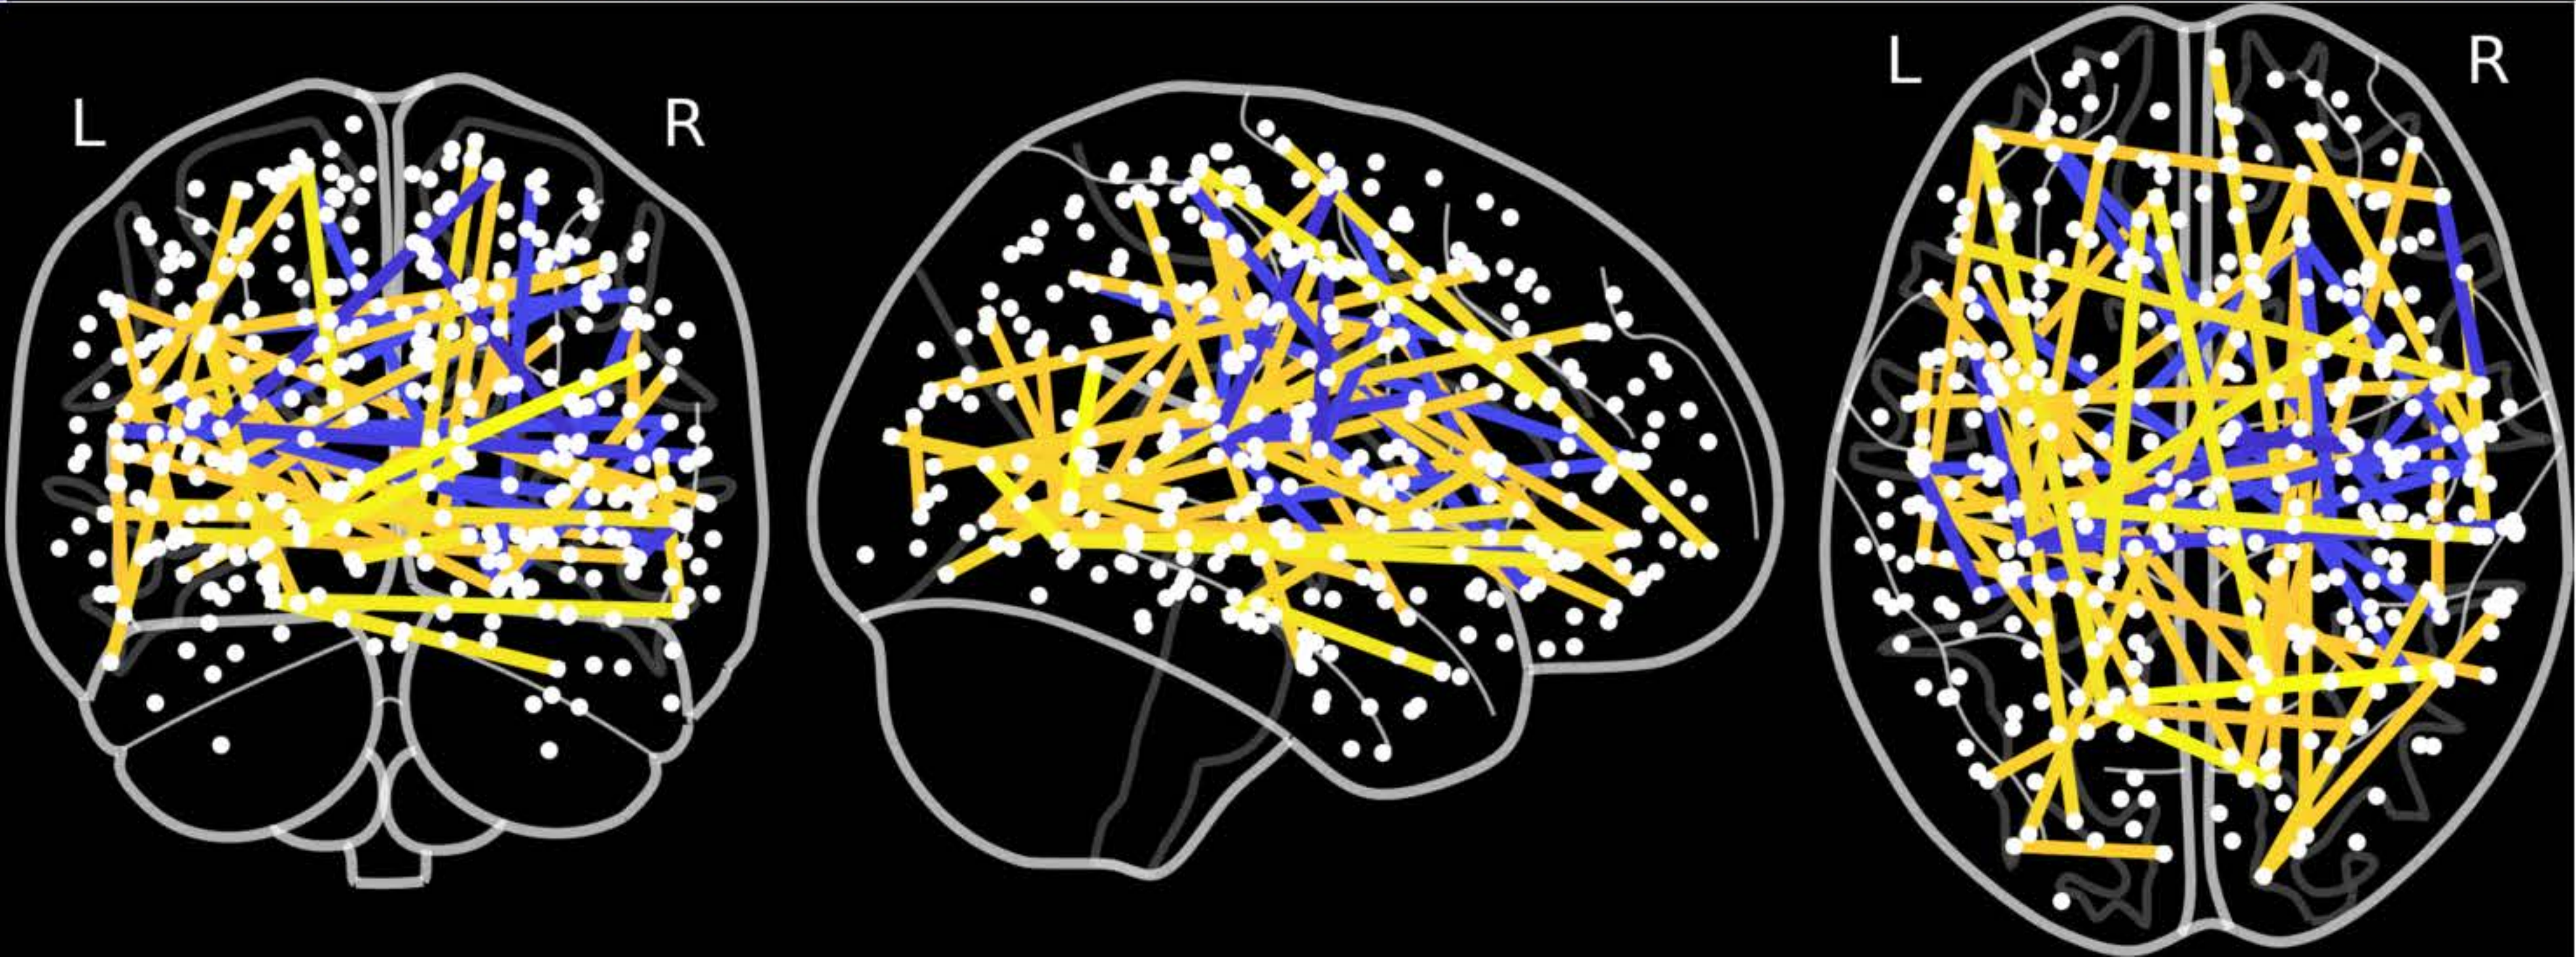



component\_62

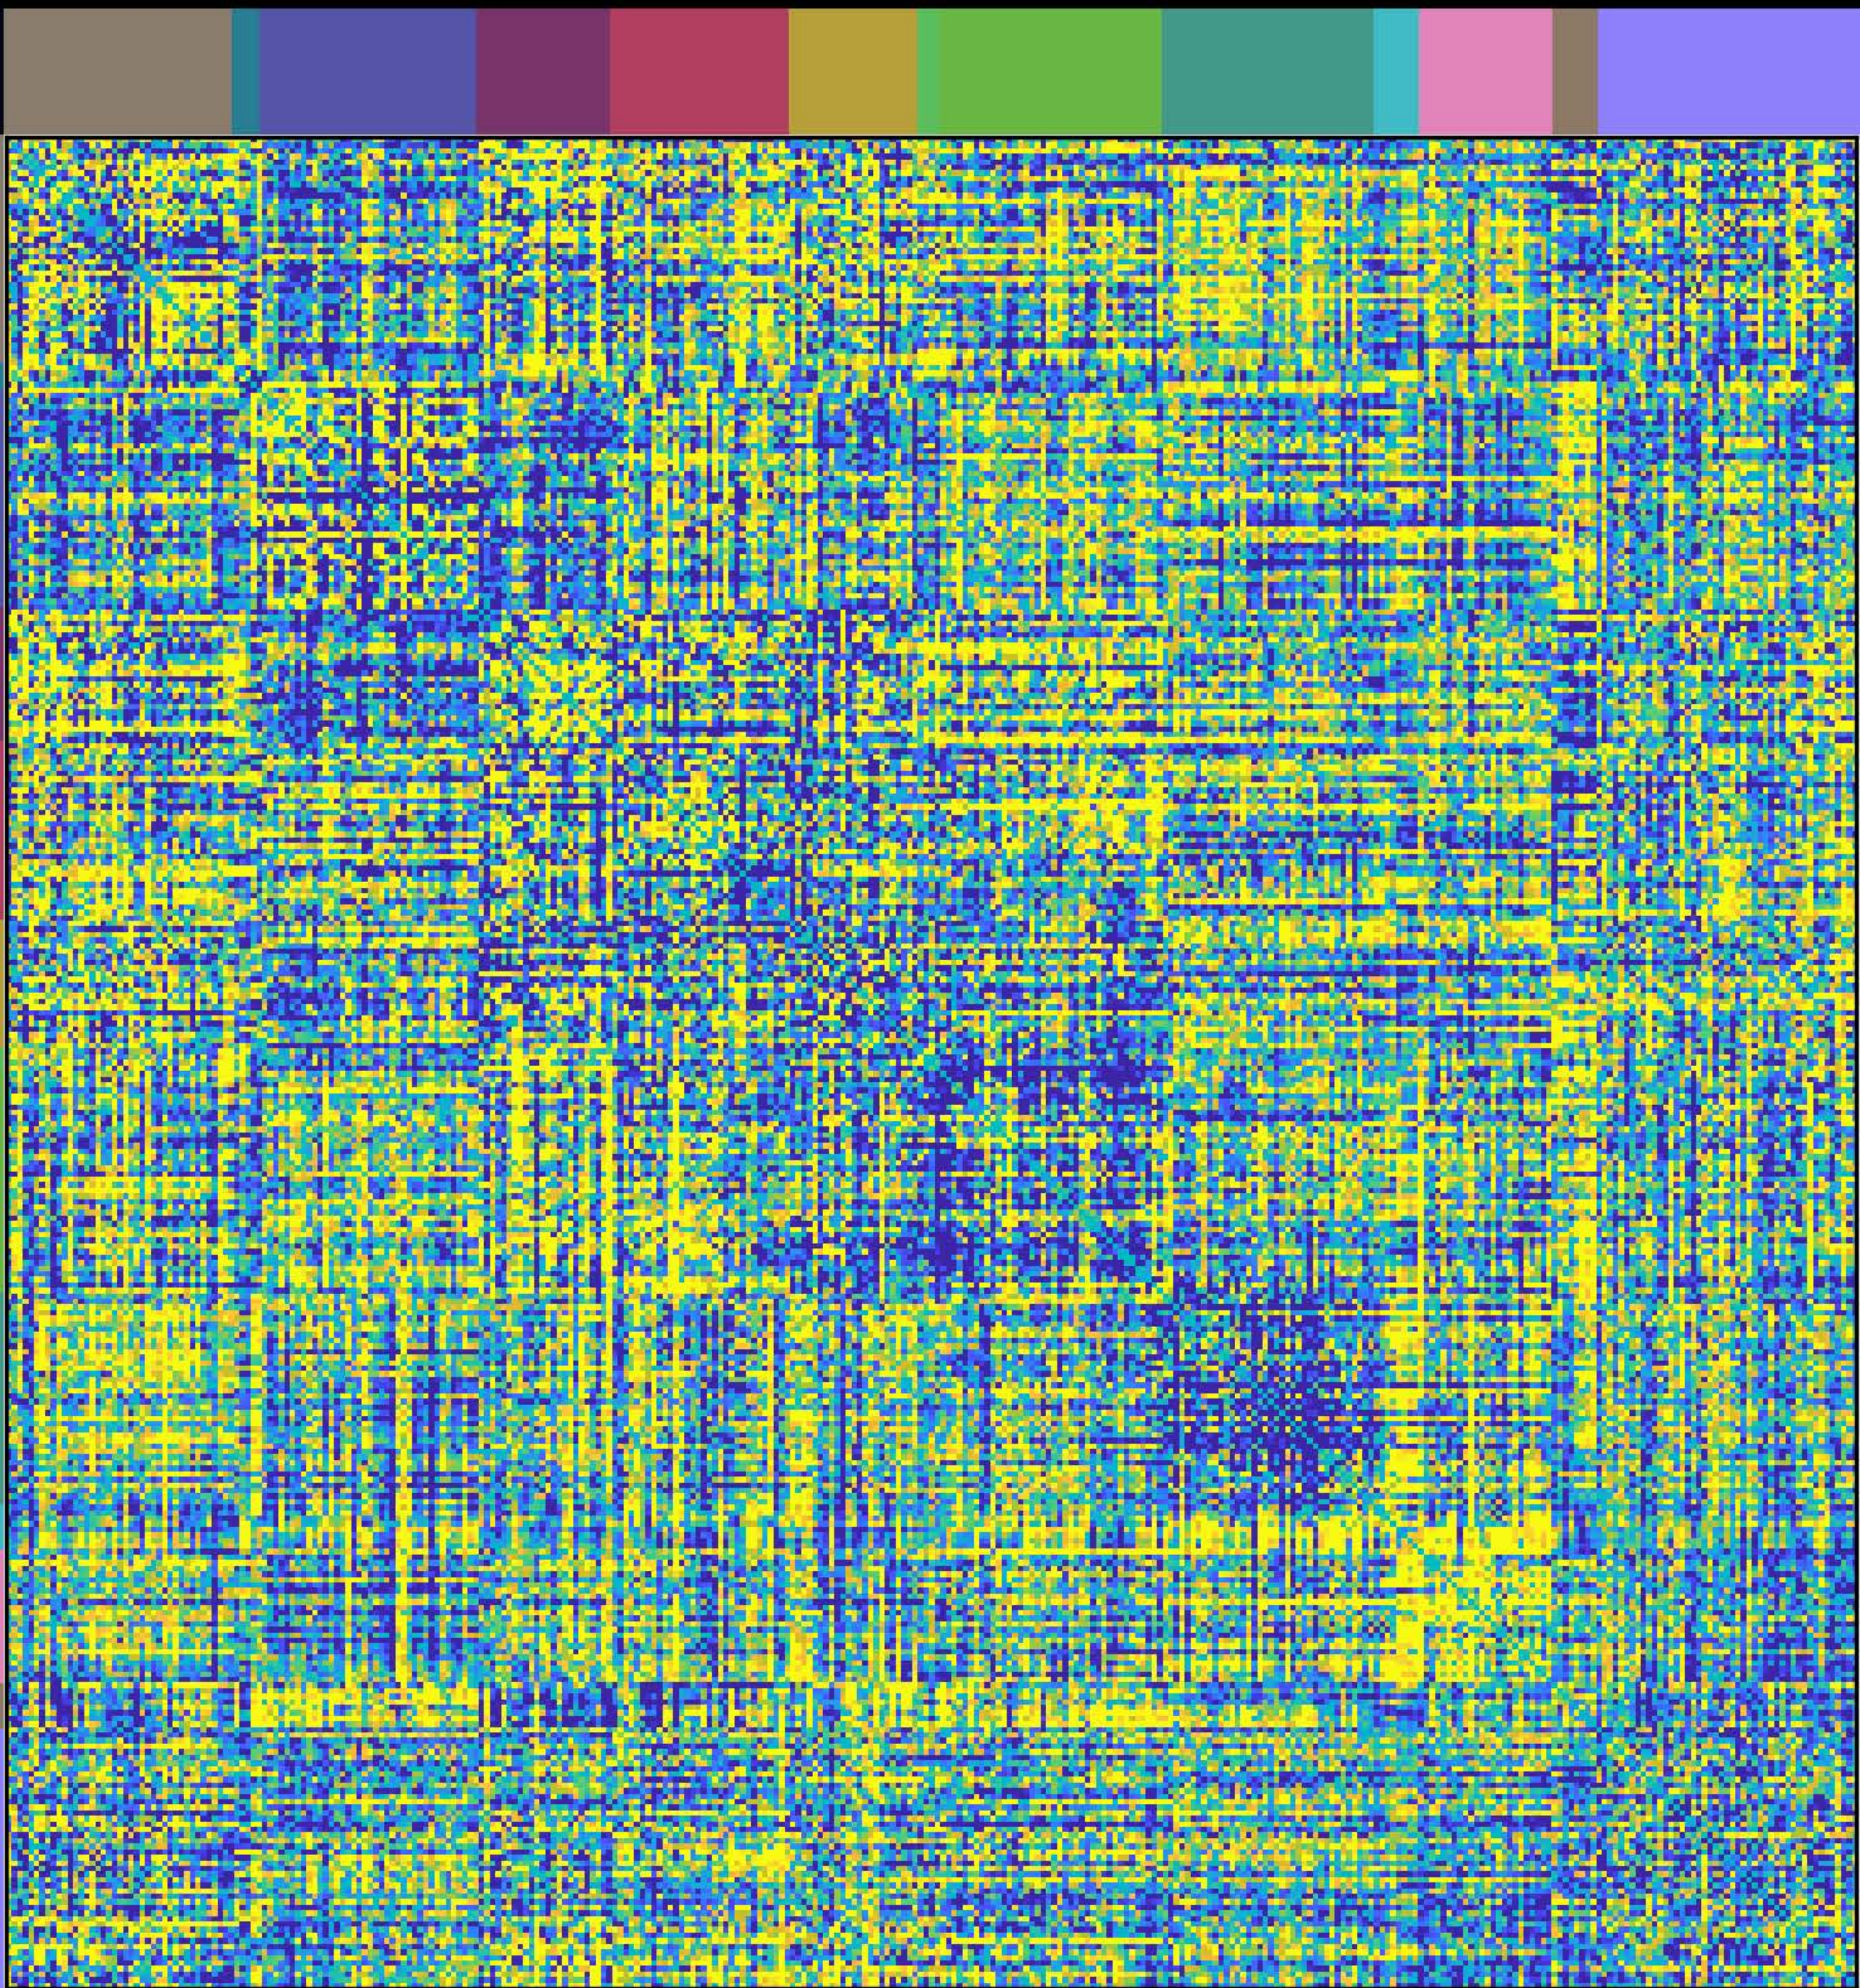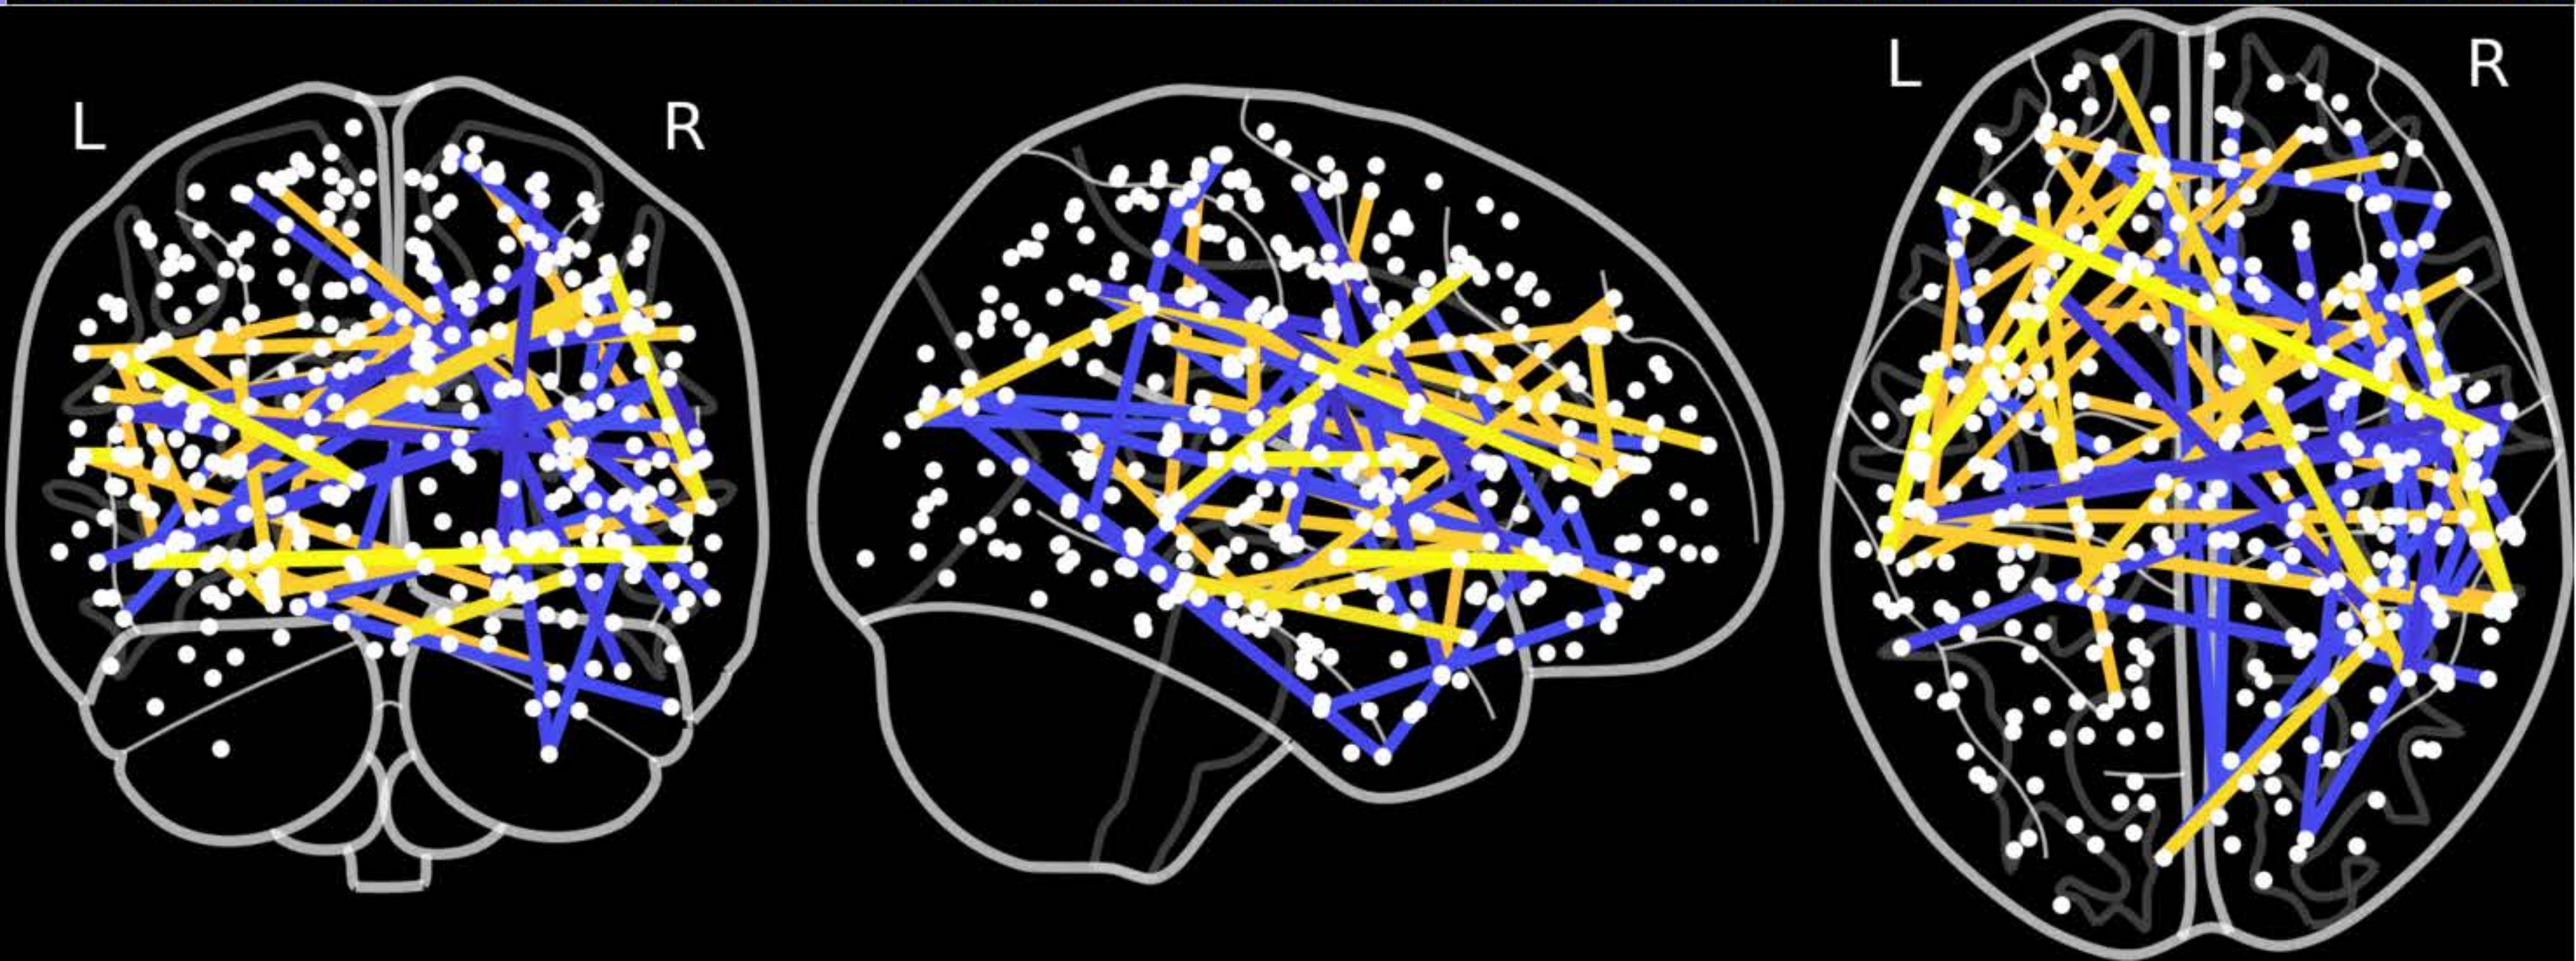



component\_63

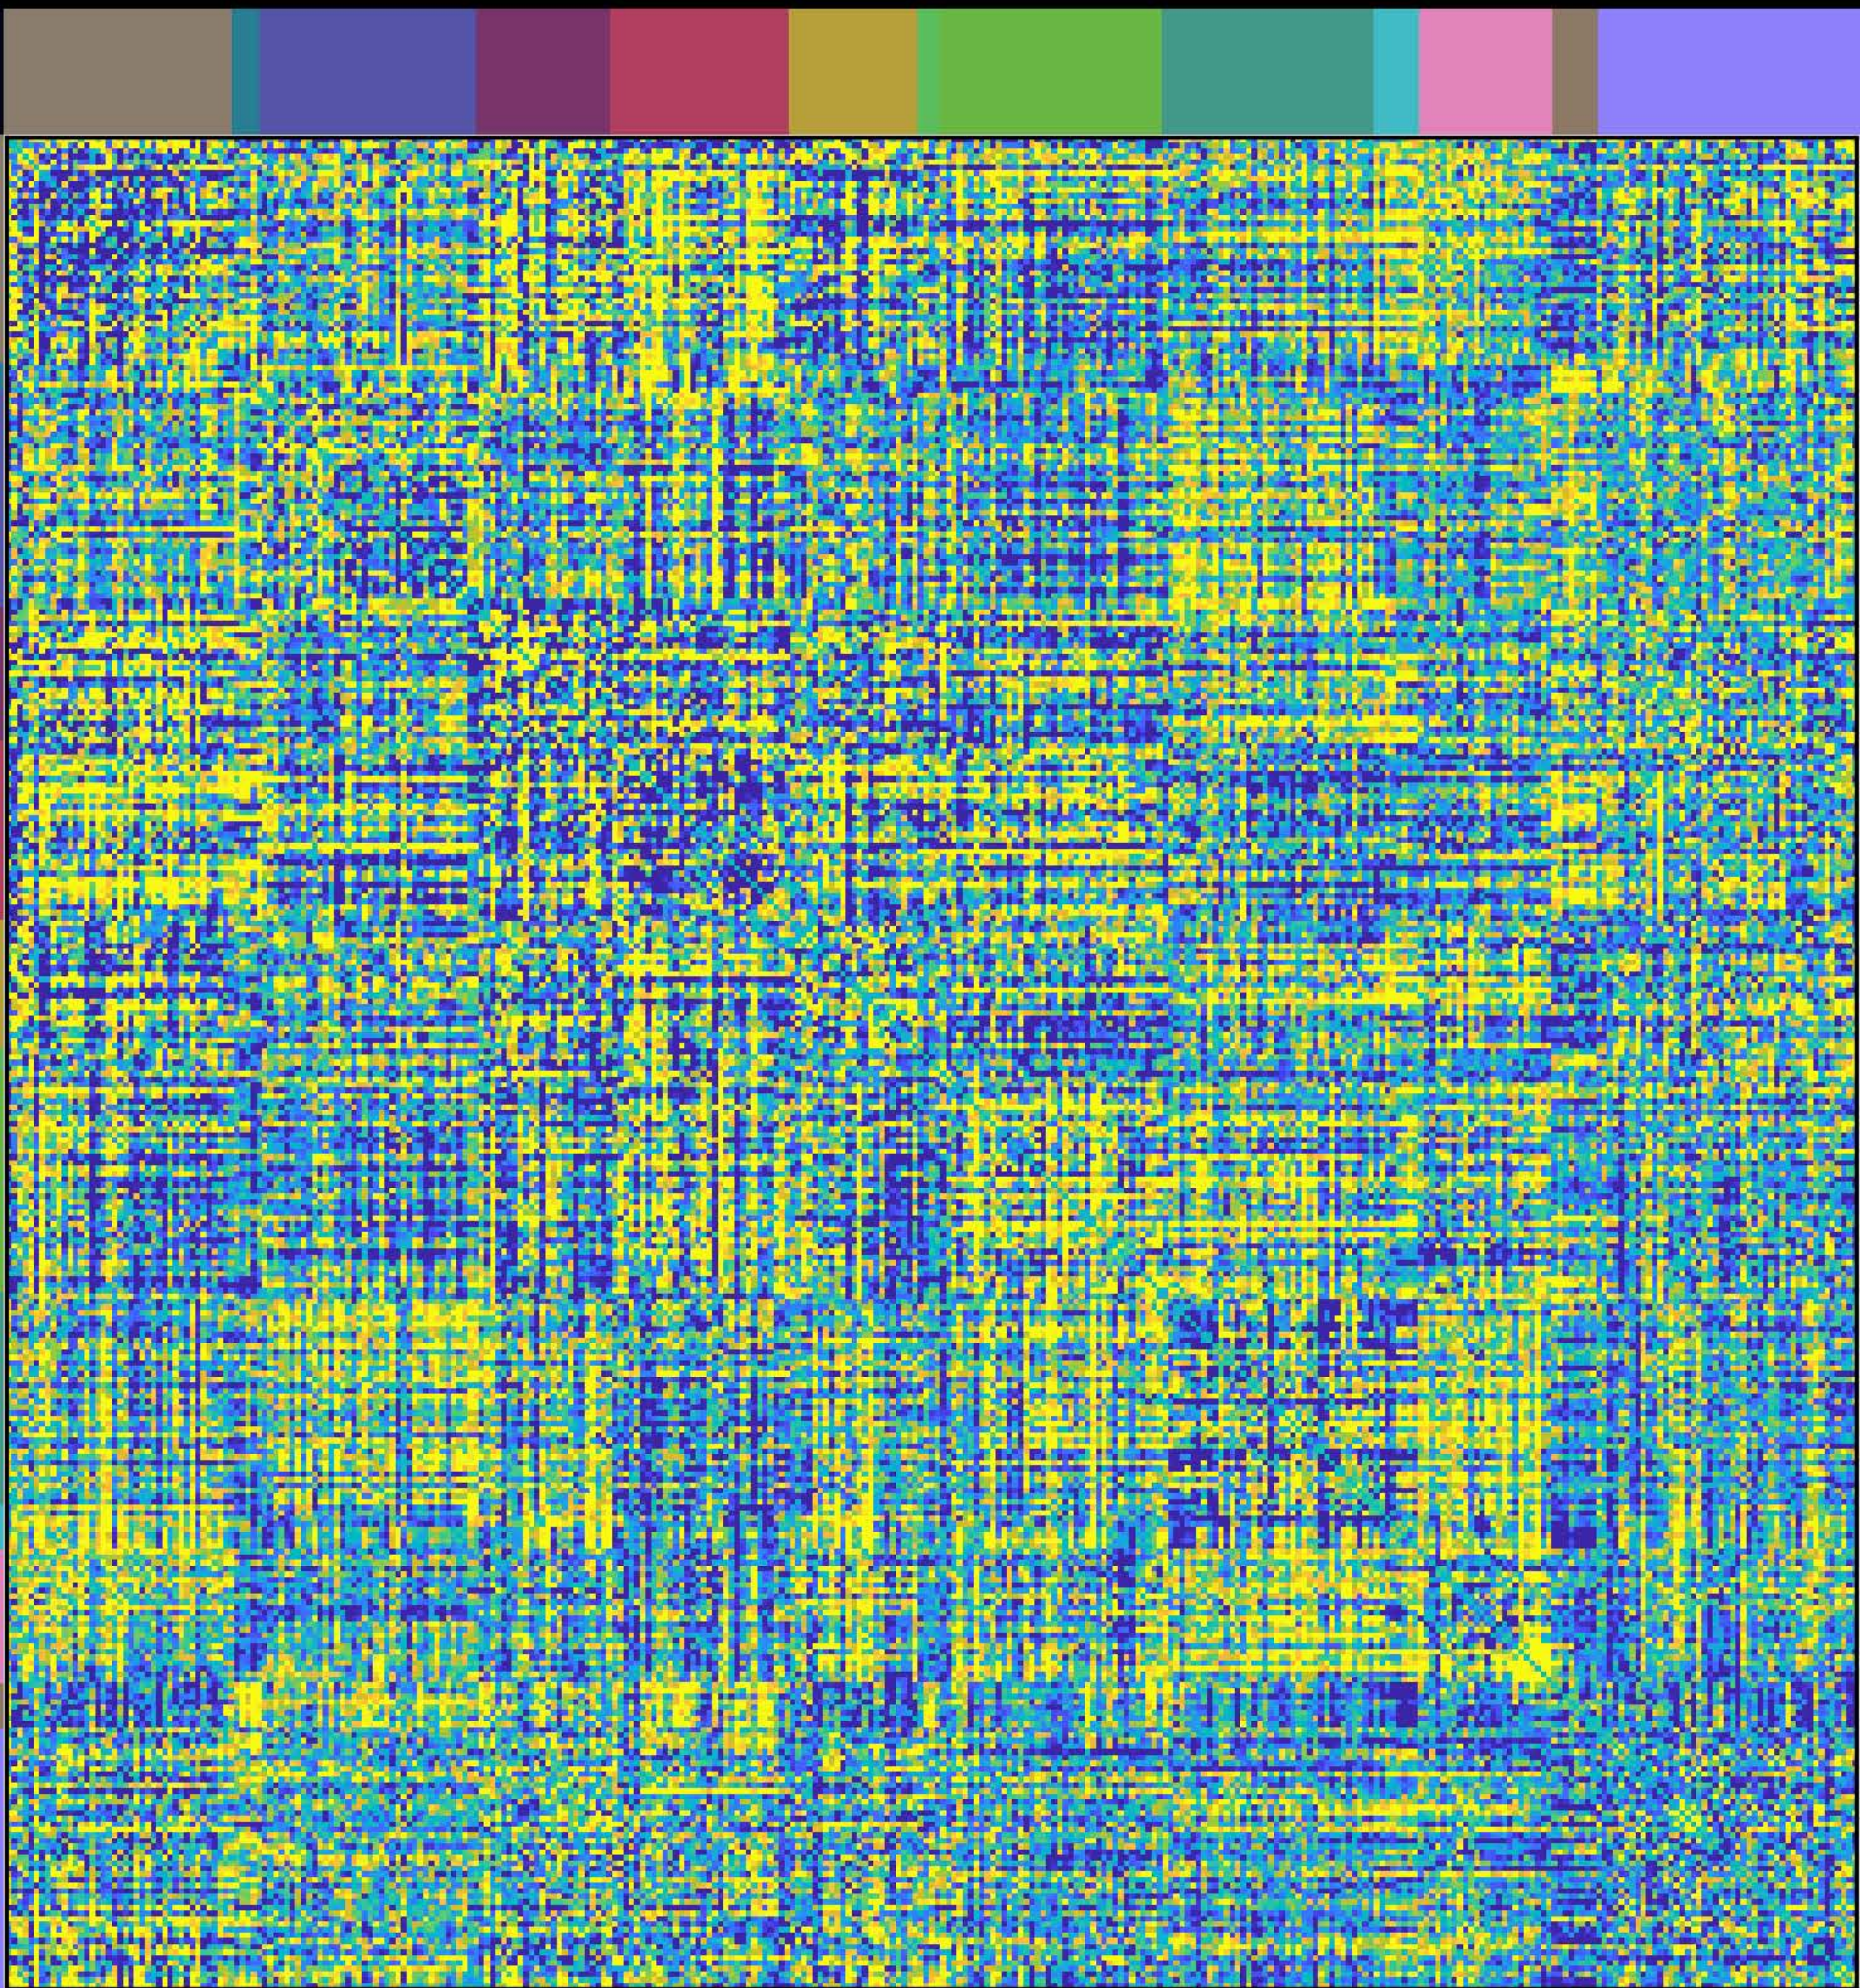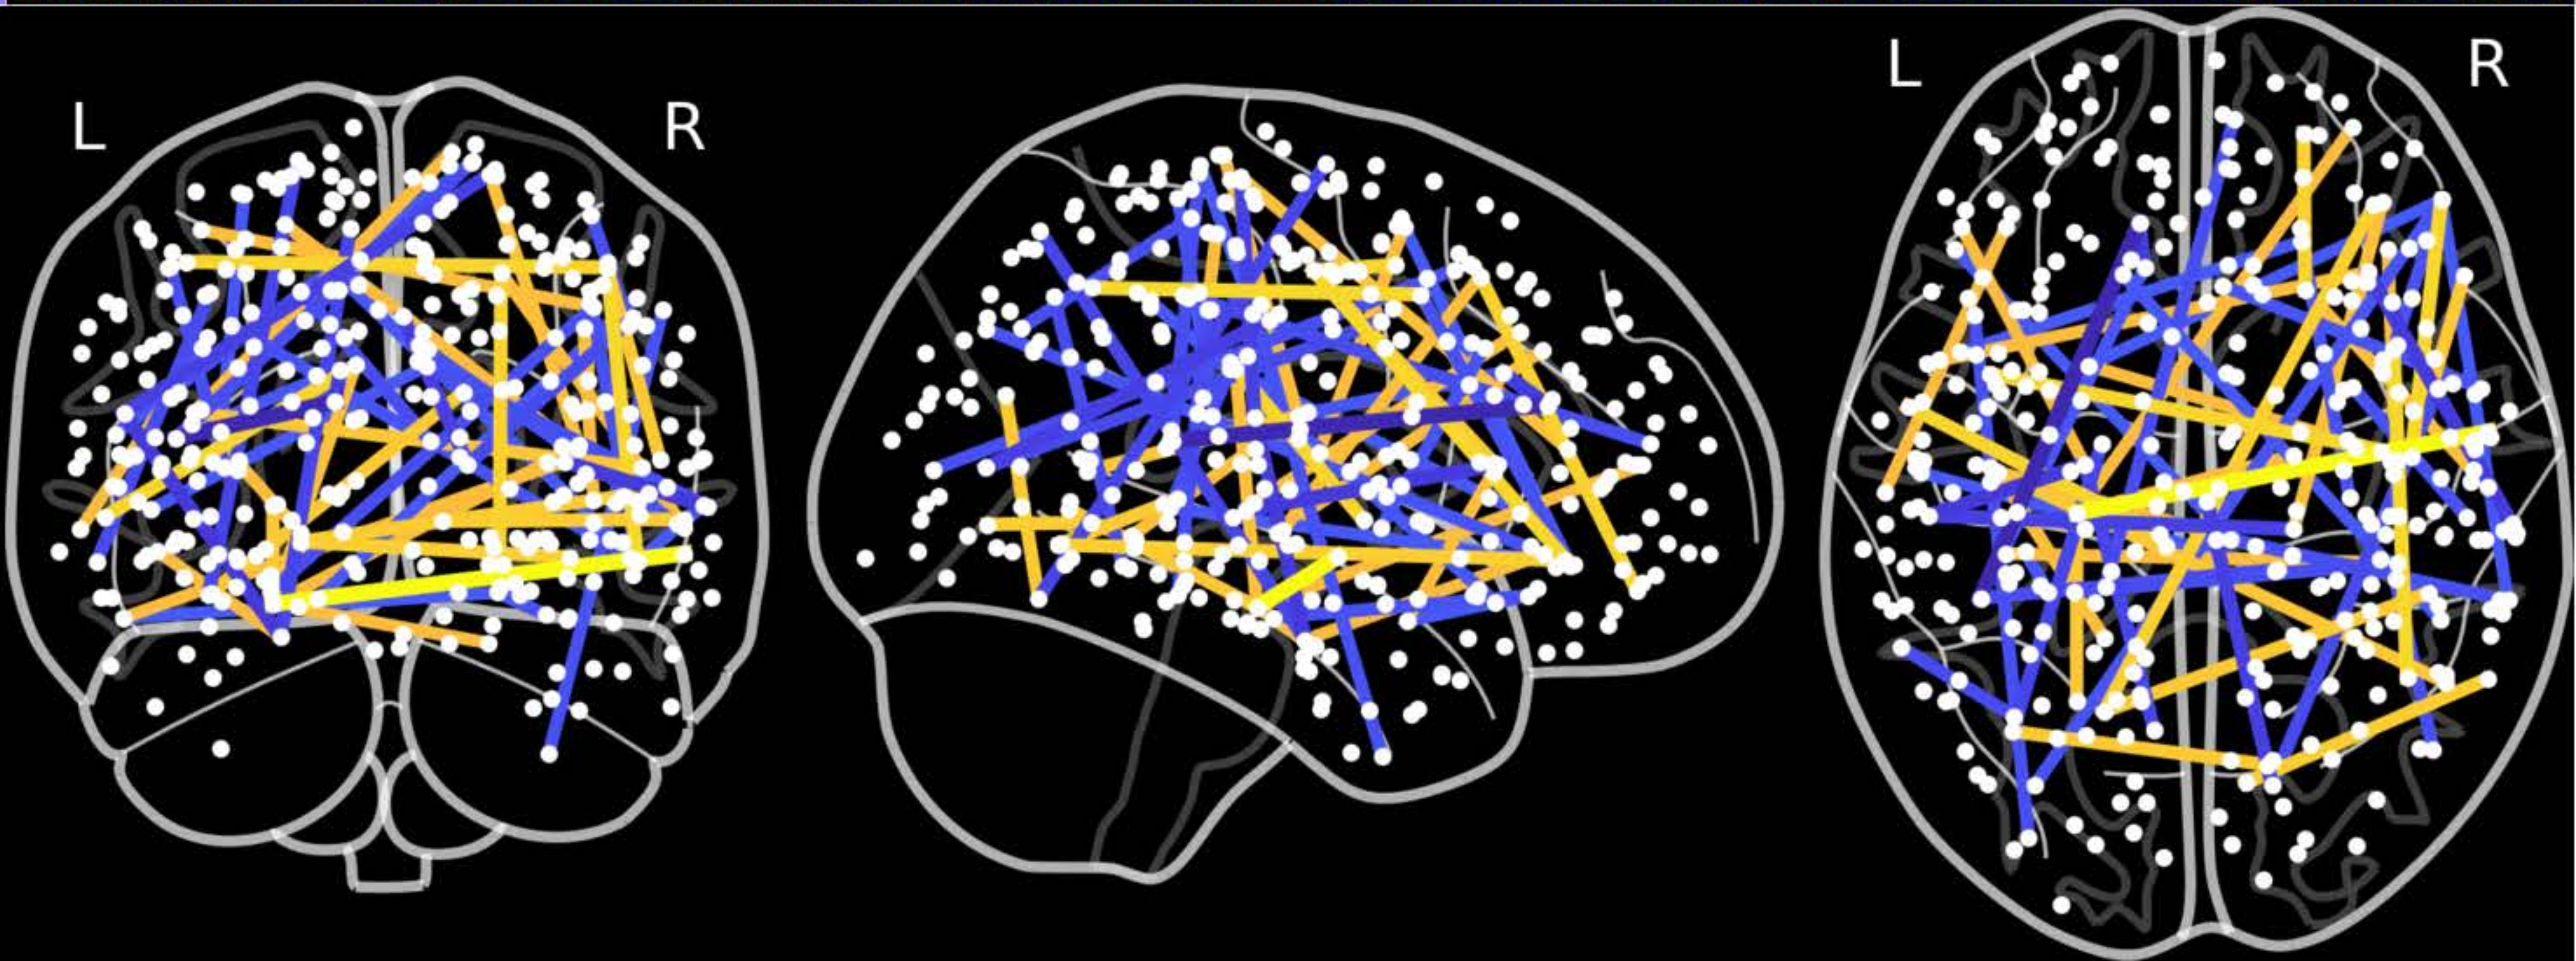



component\_64

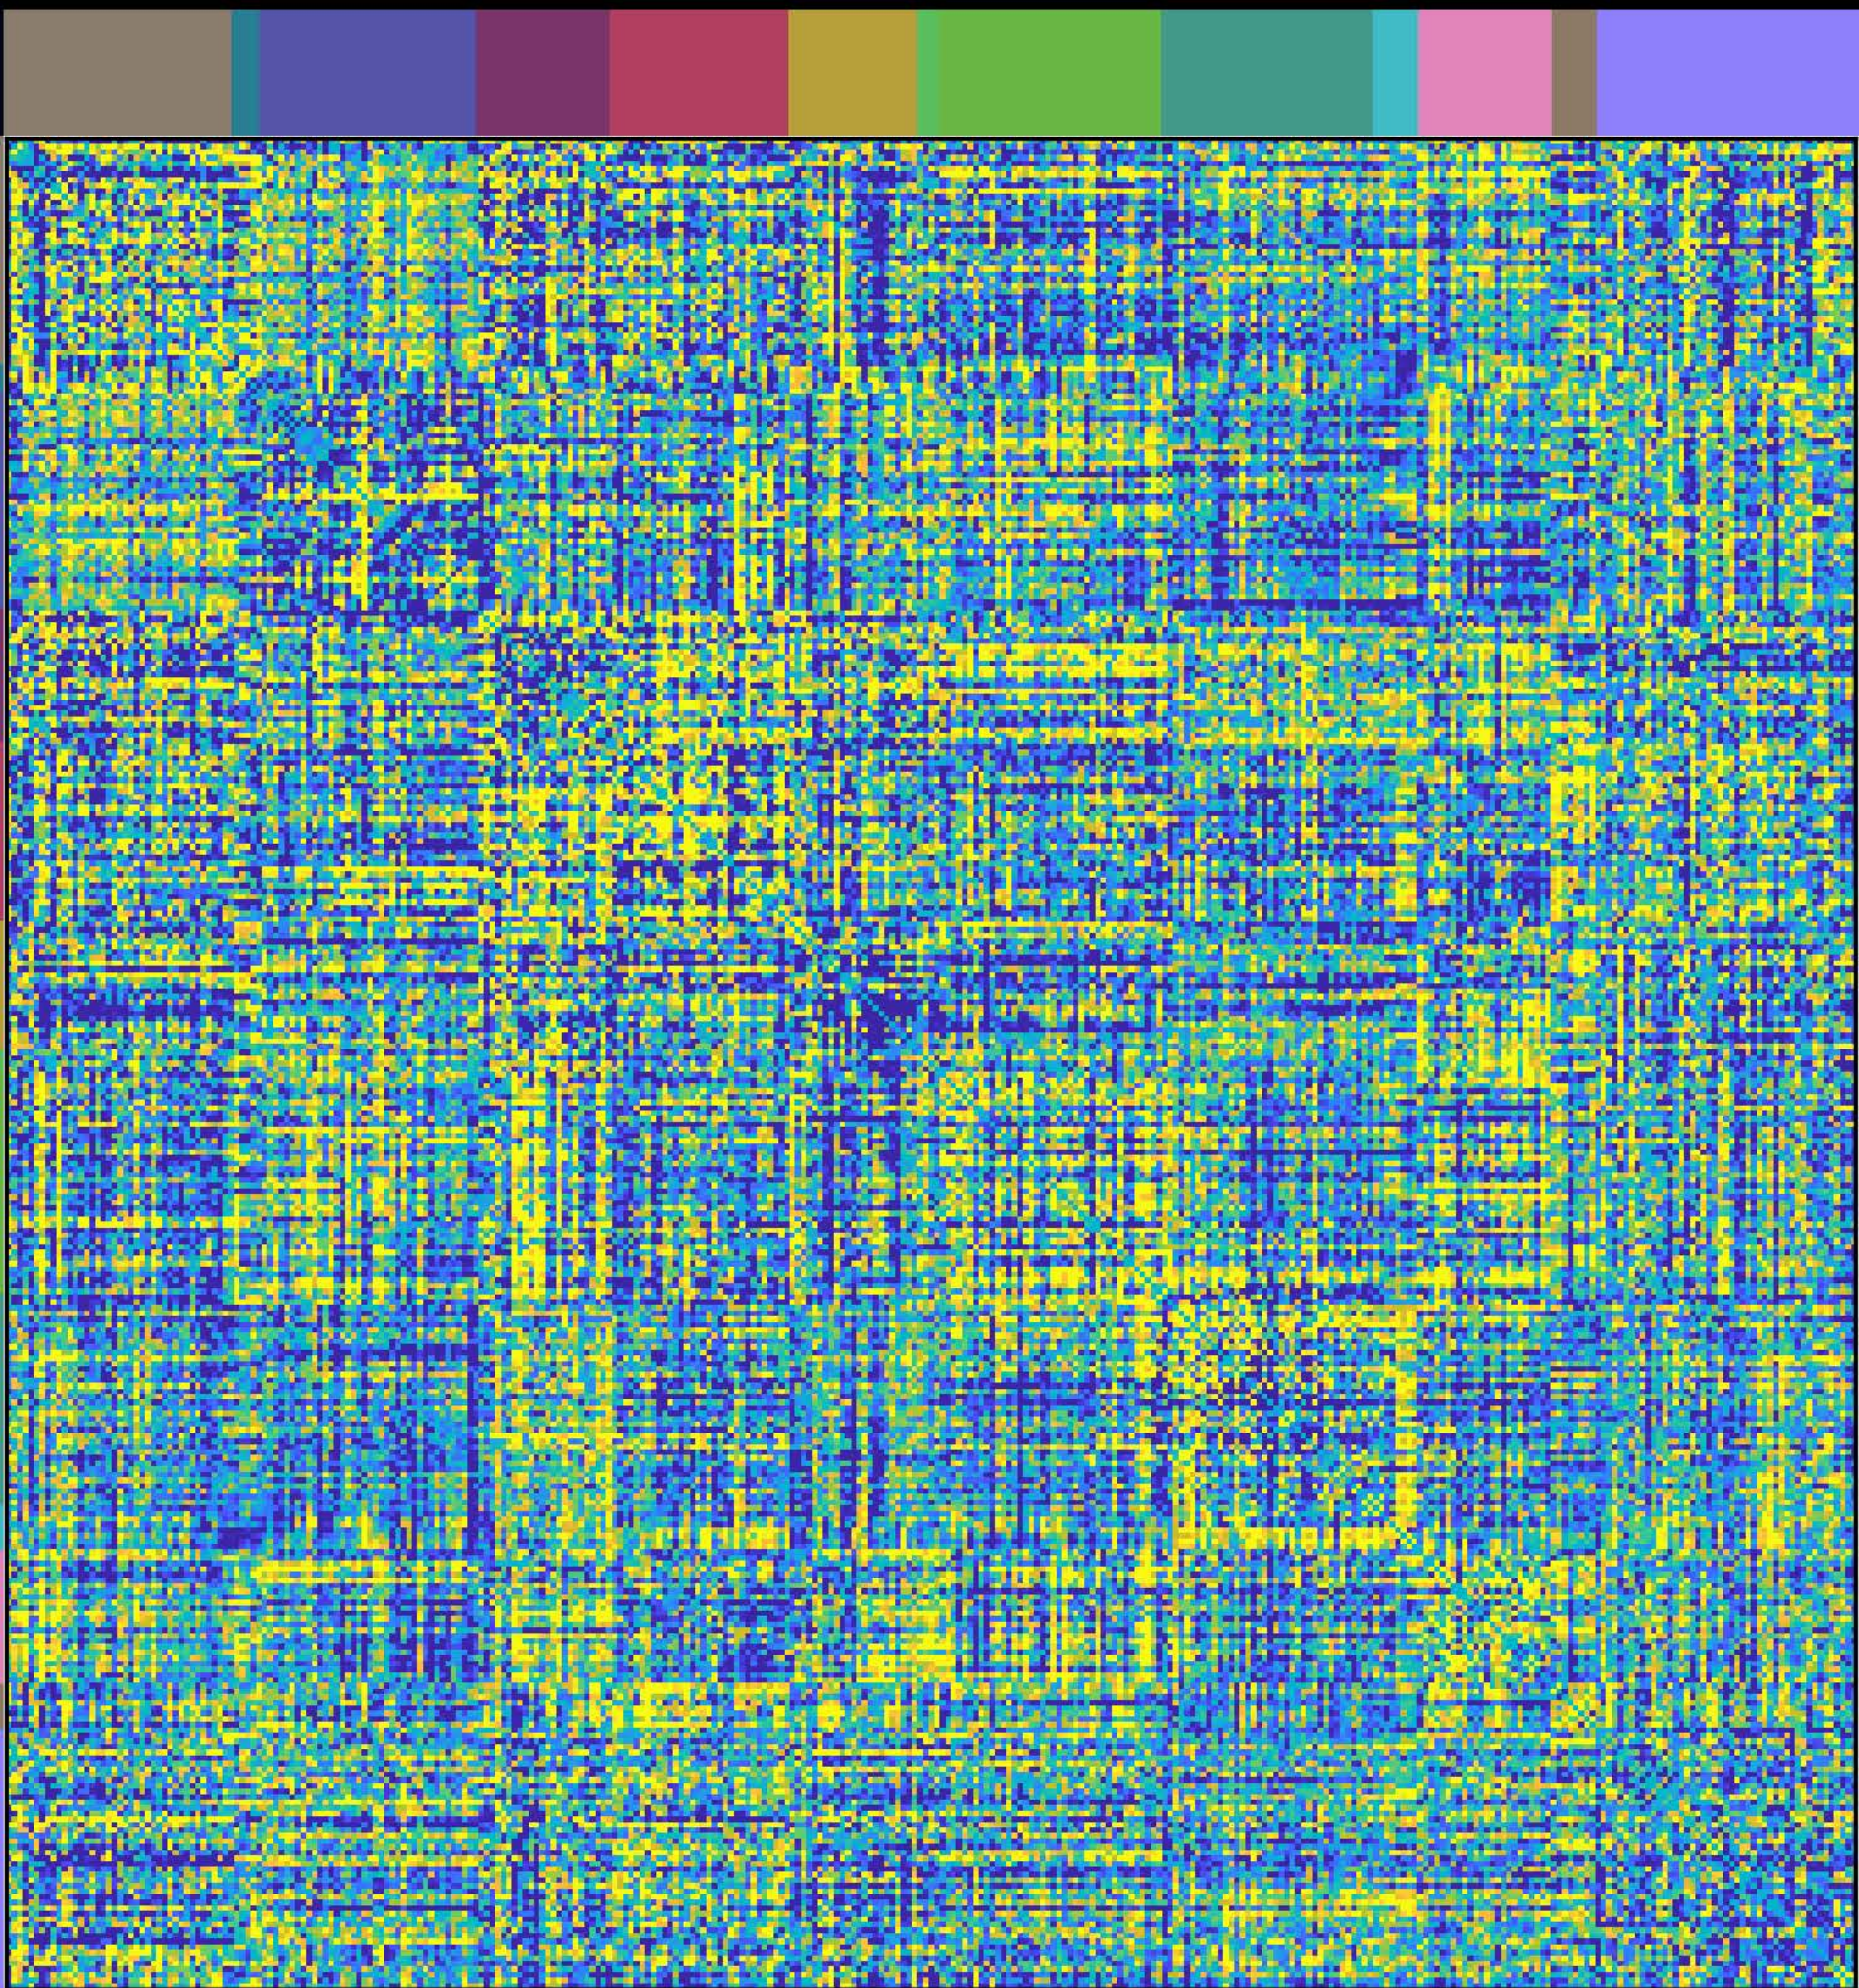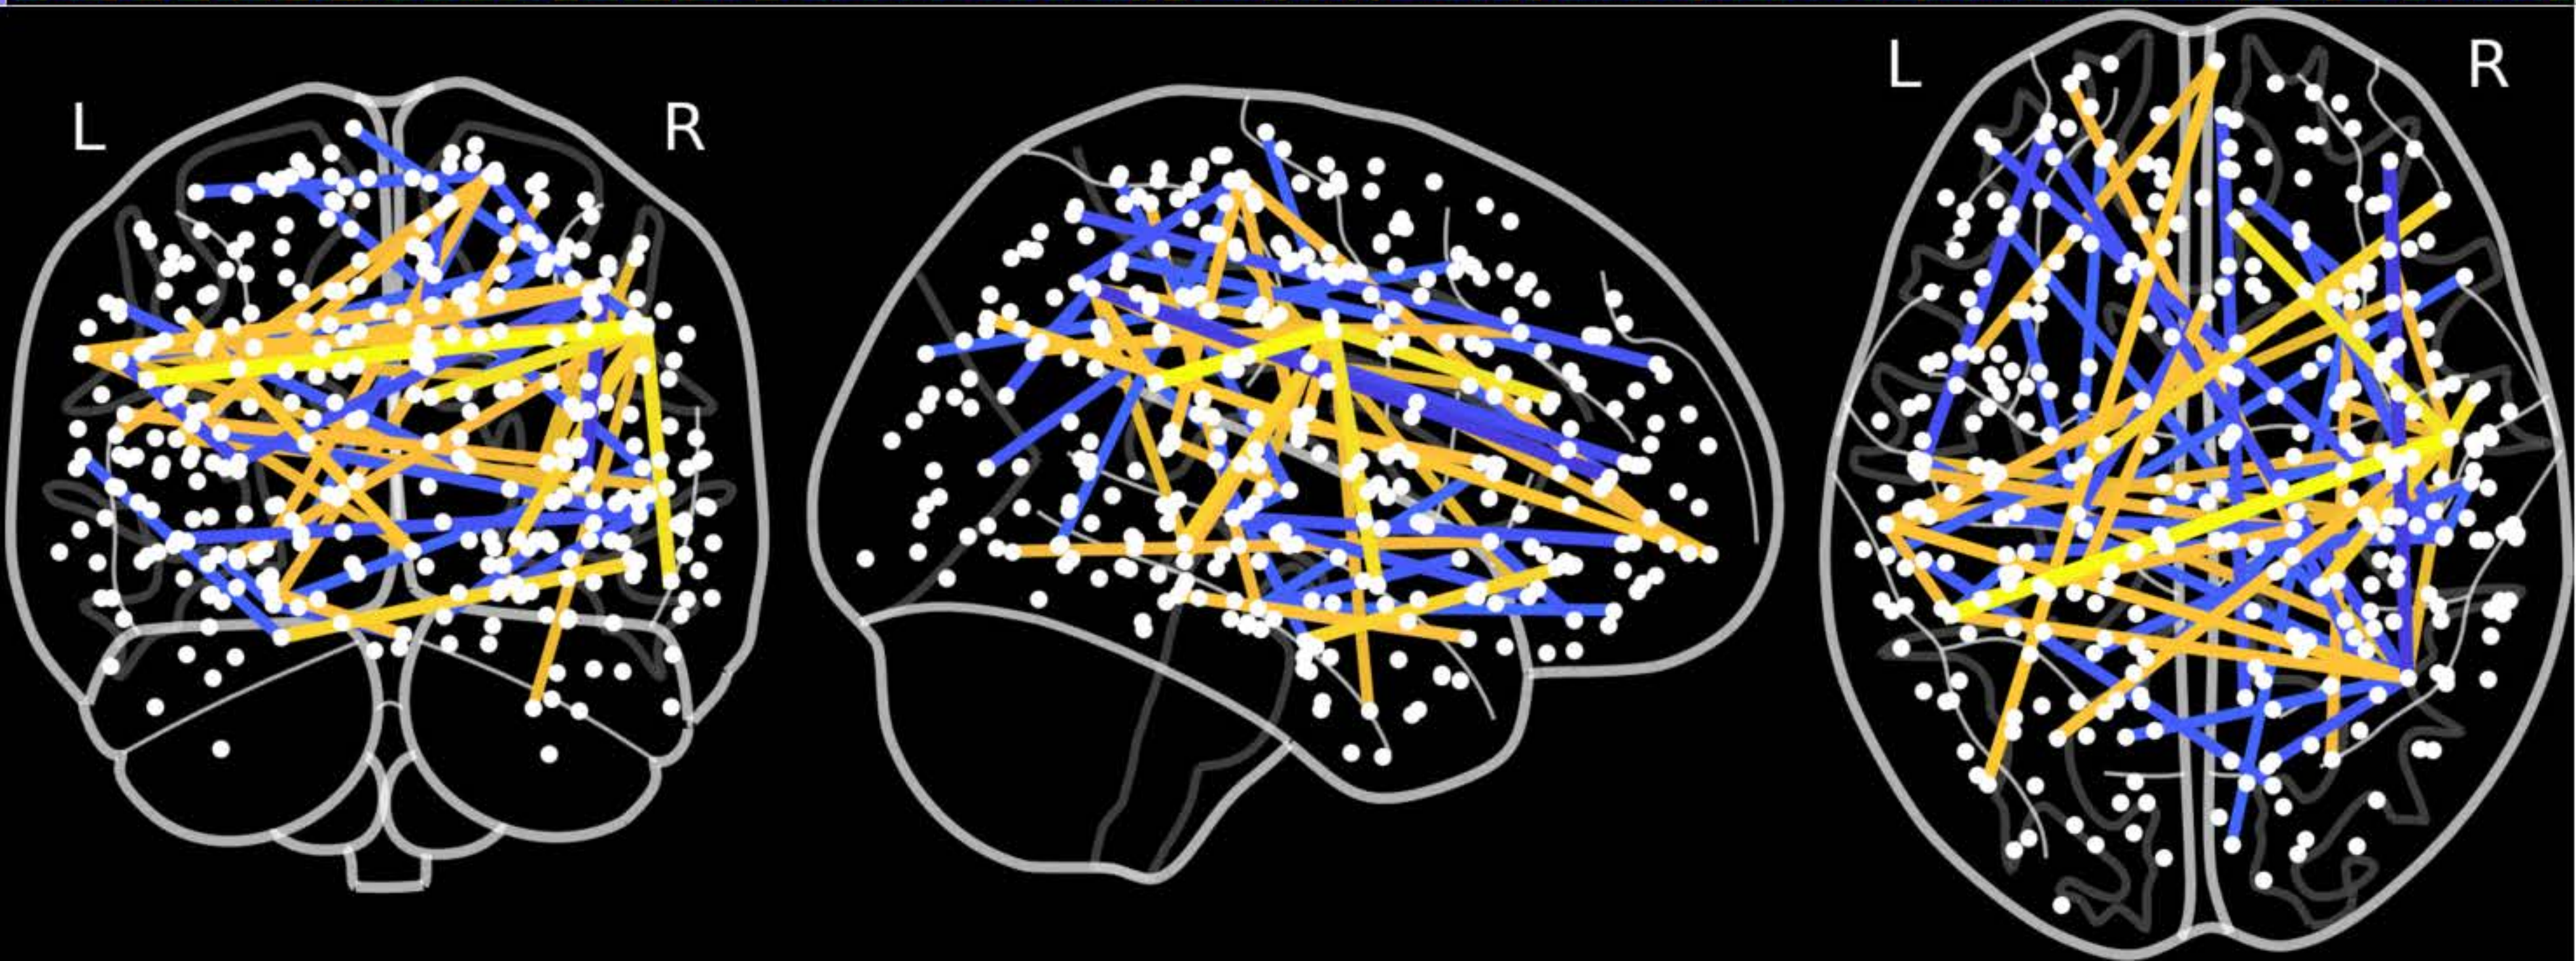



component\_65

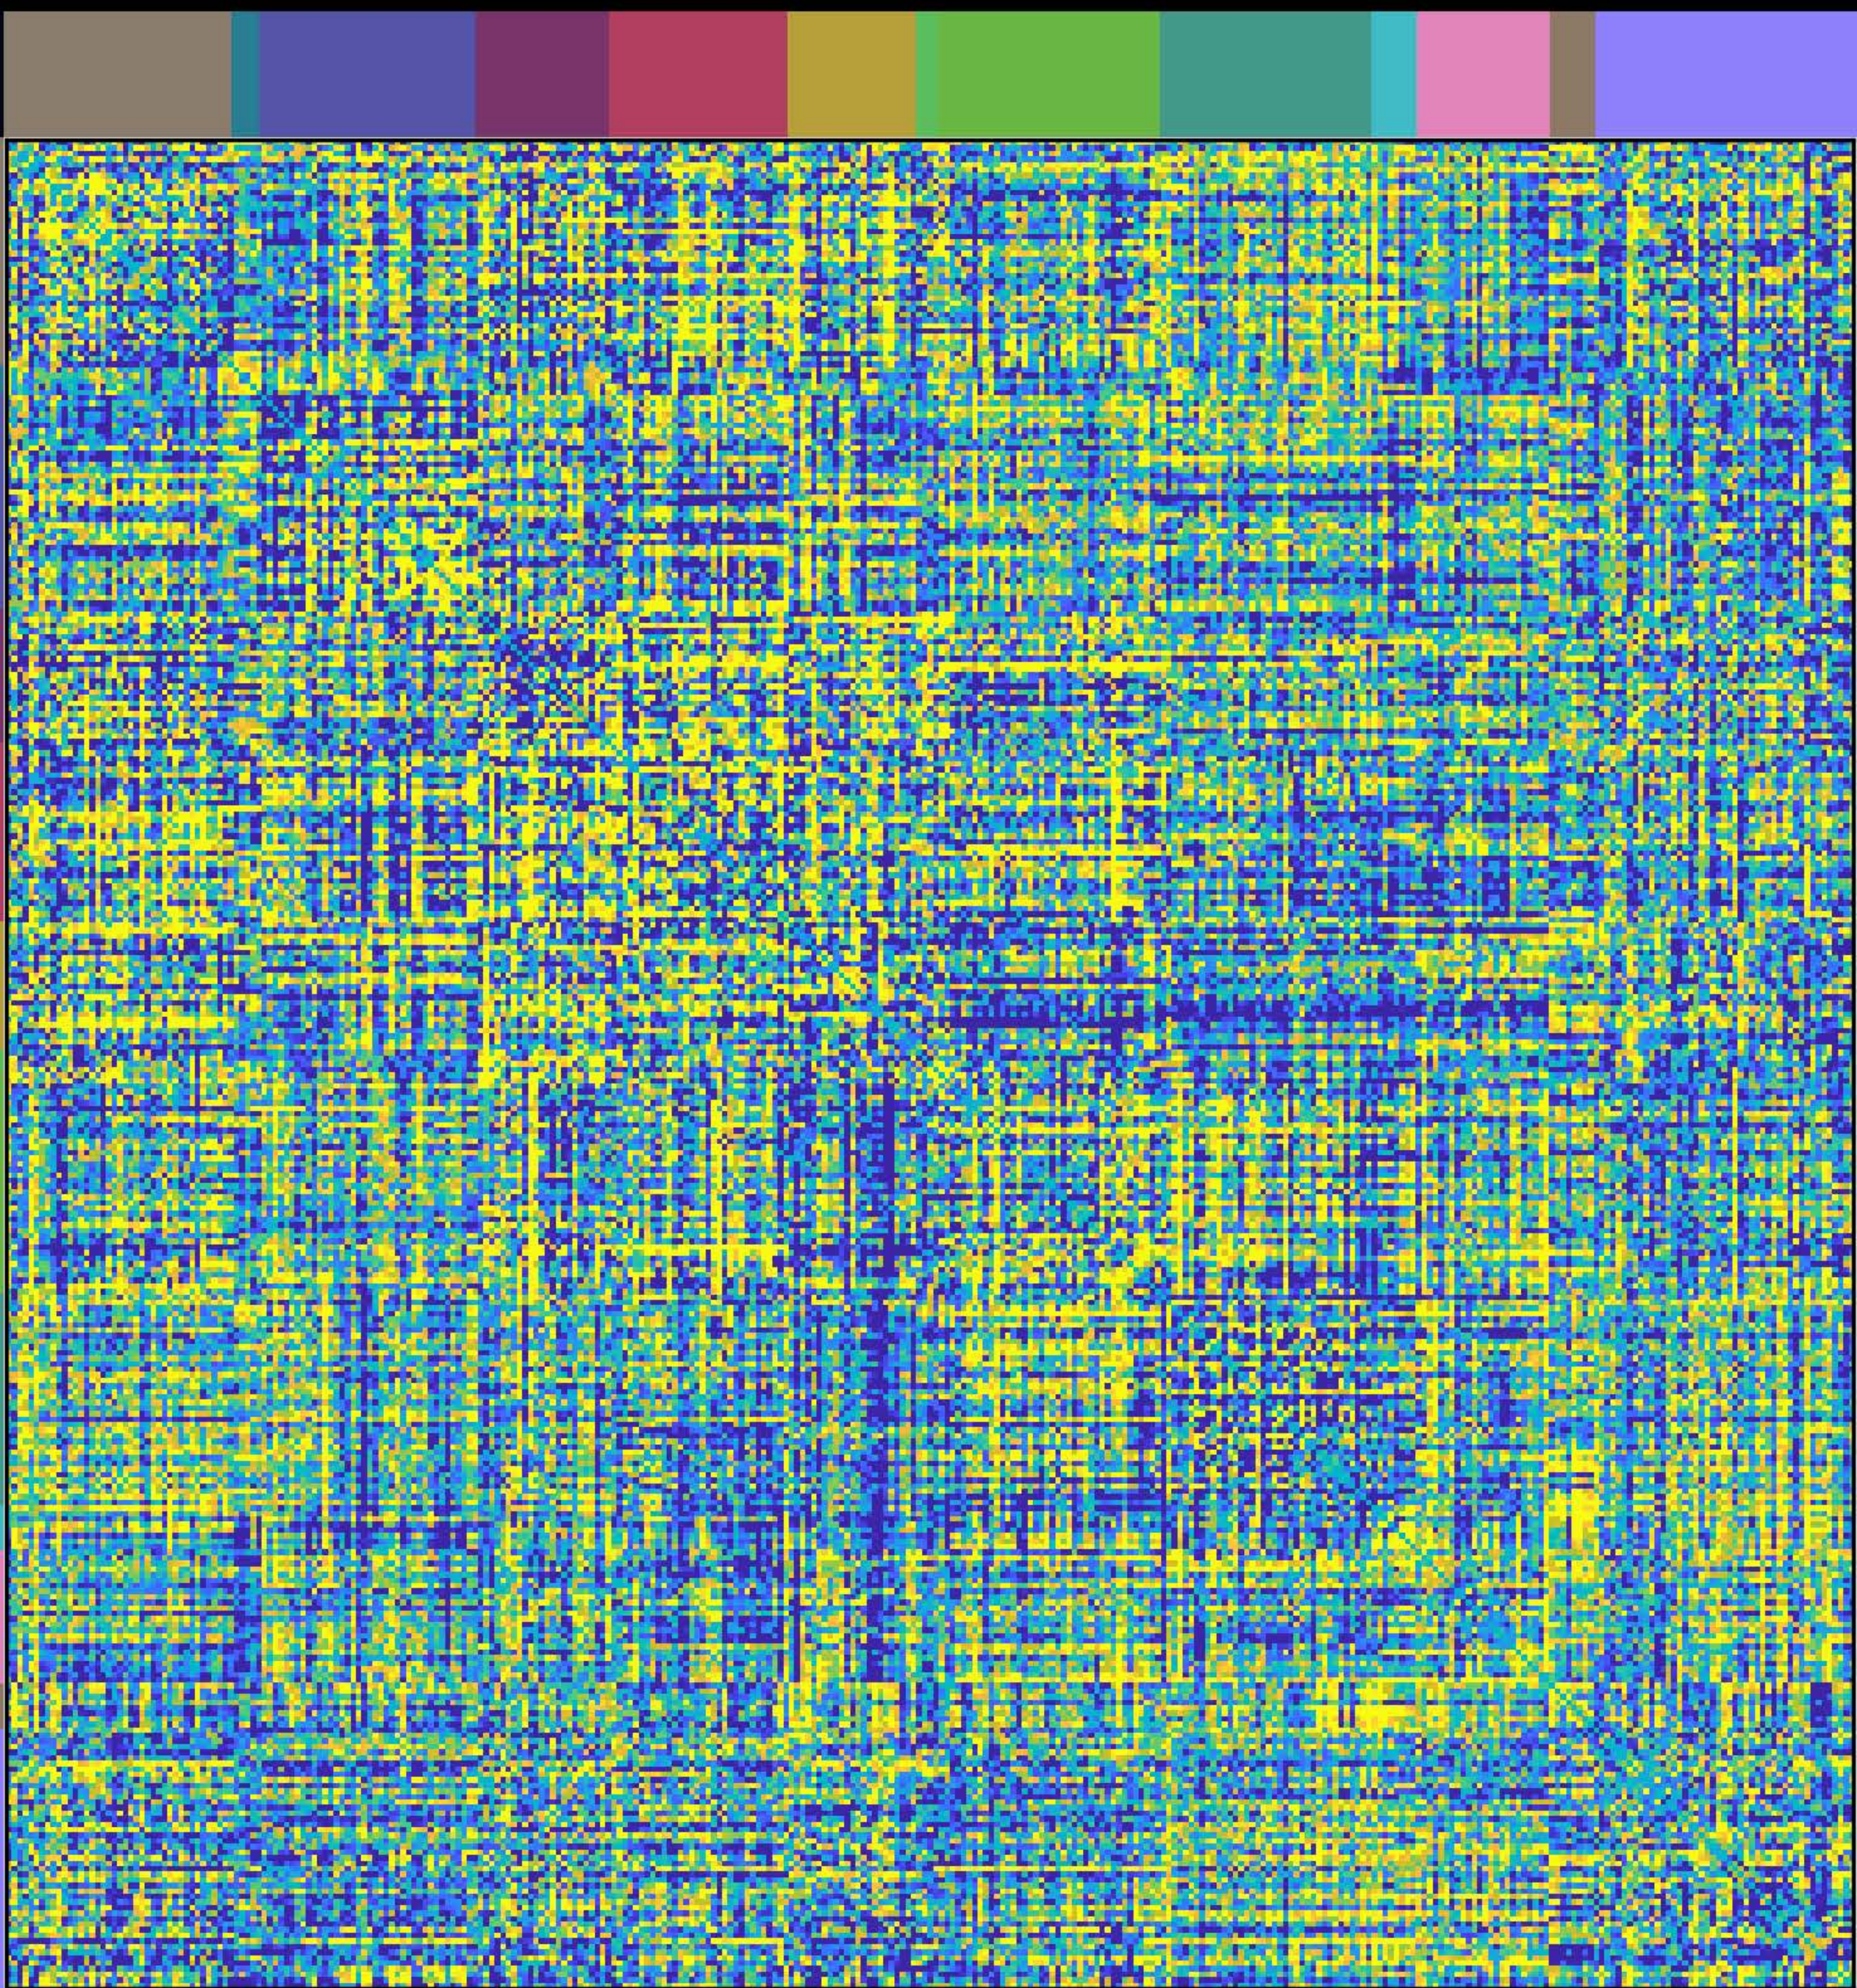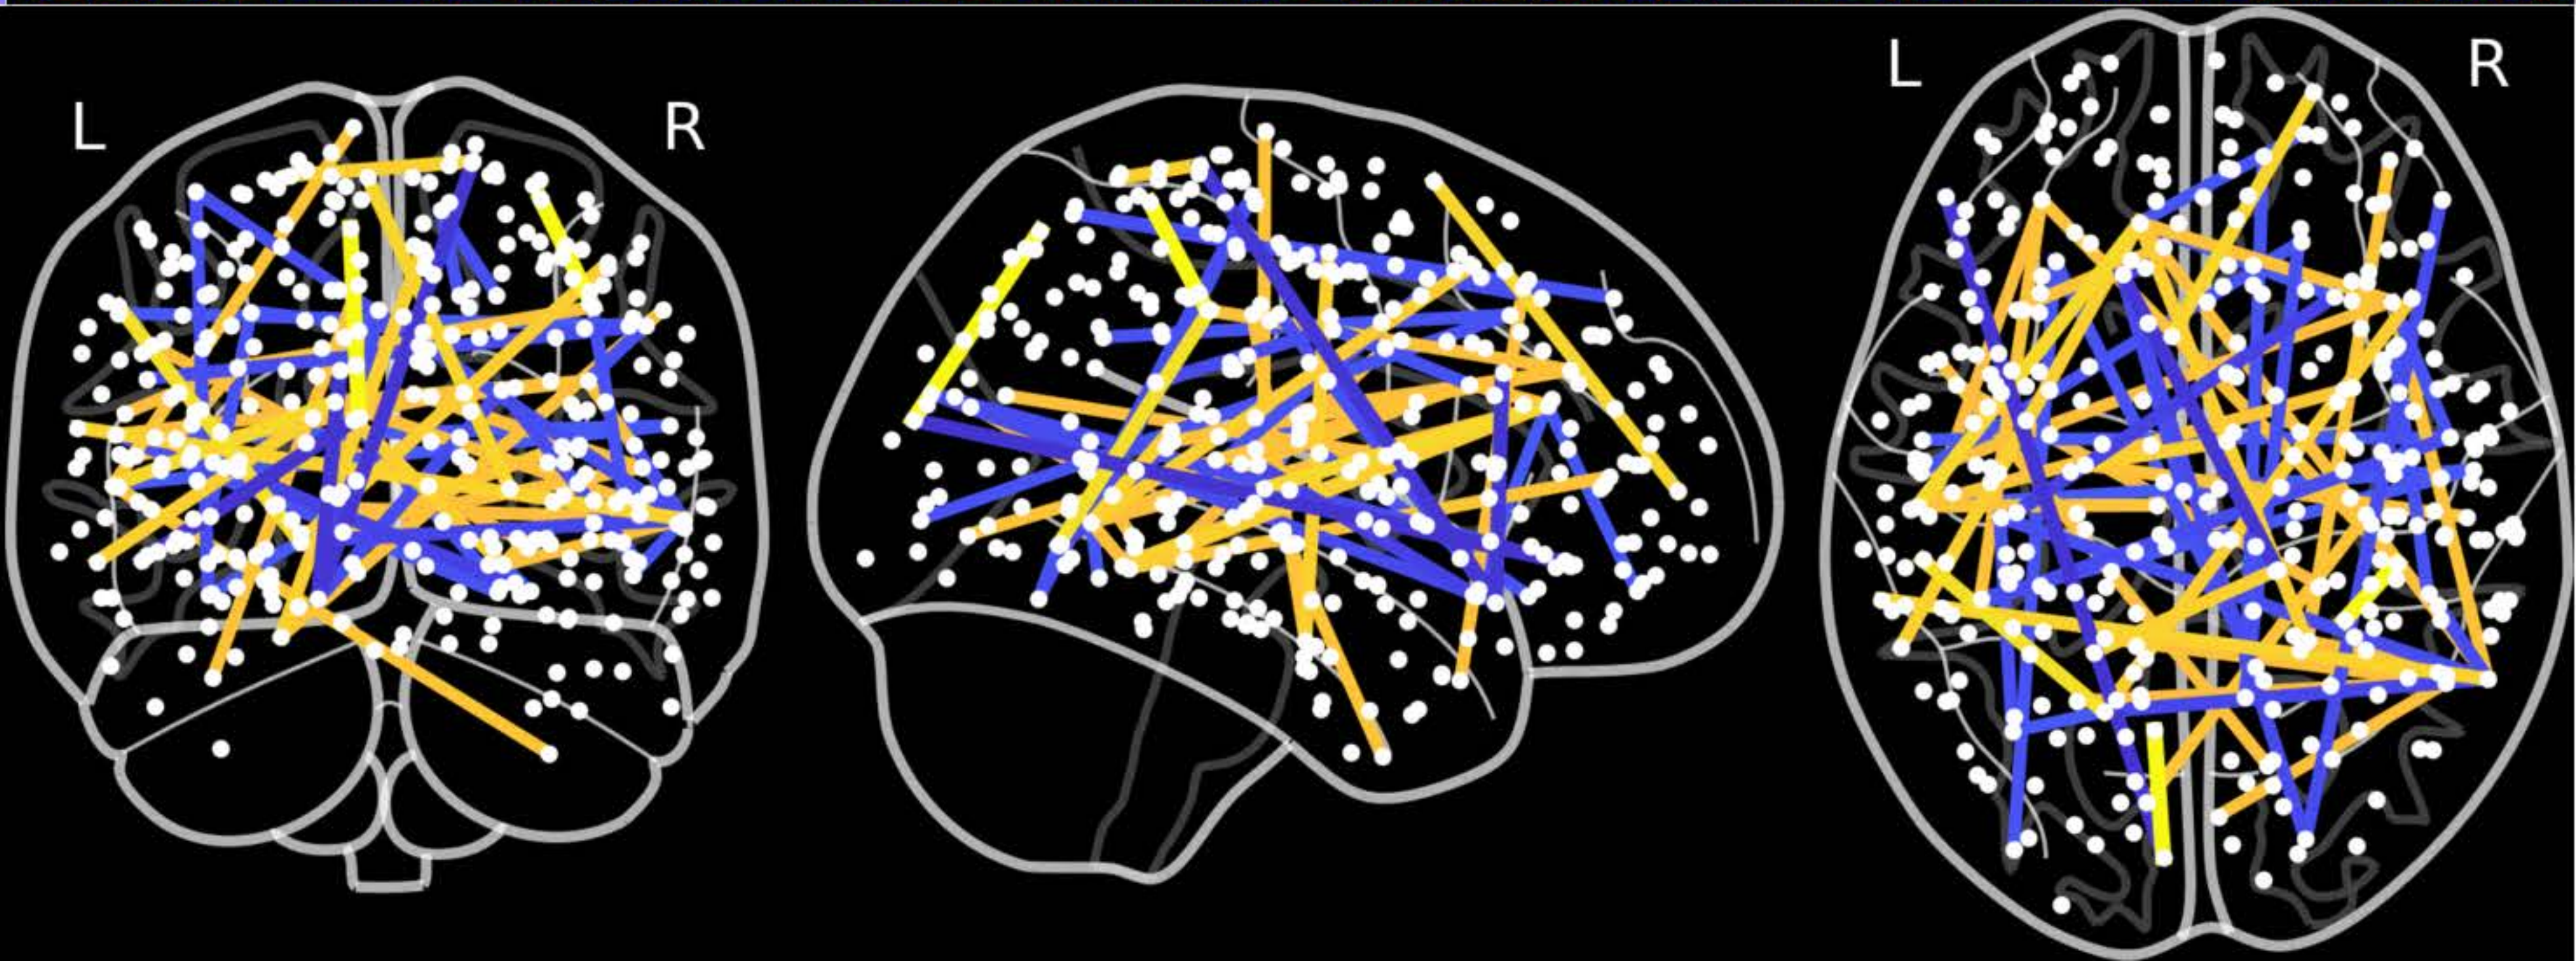



component\_66

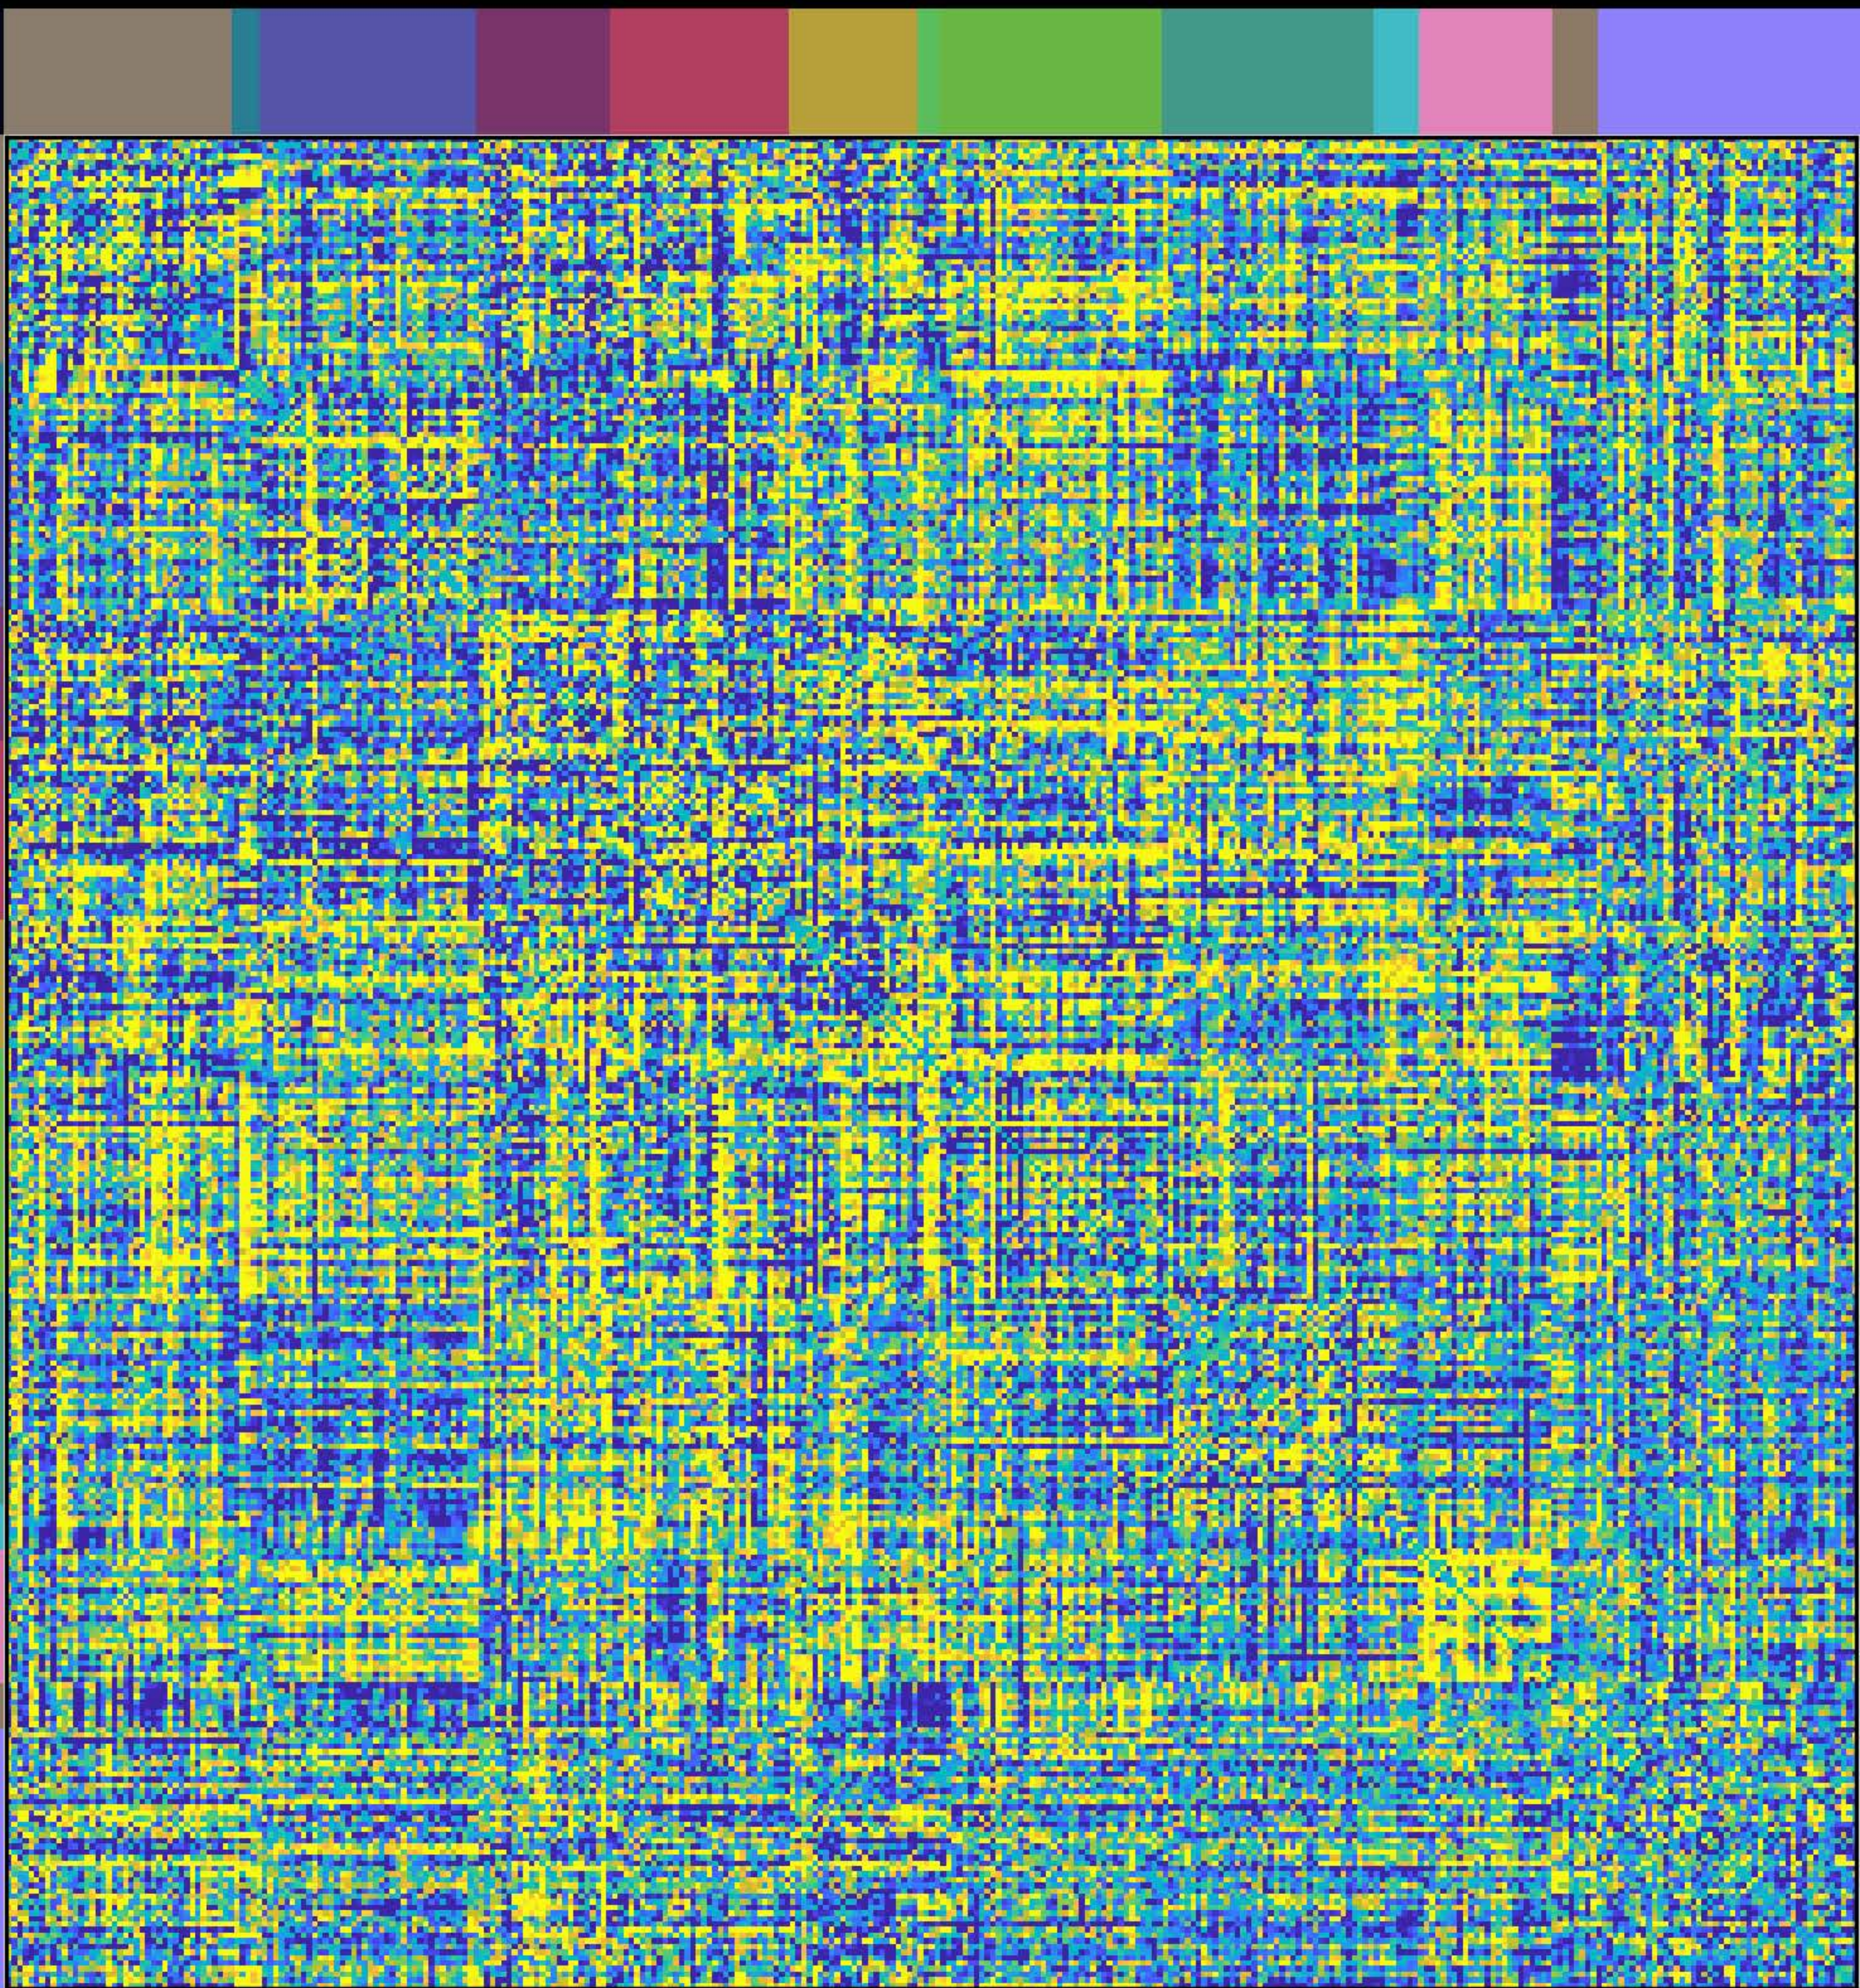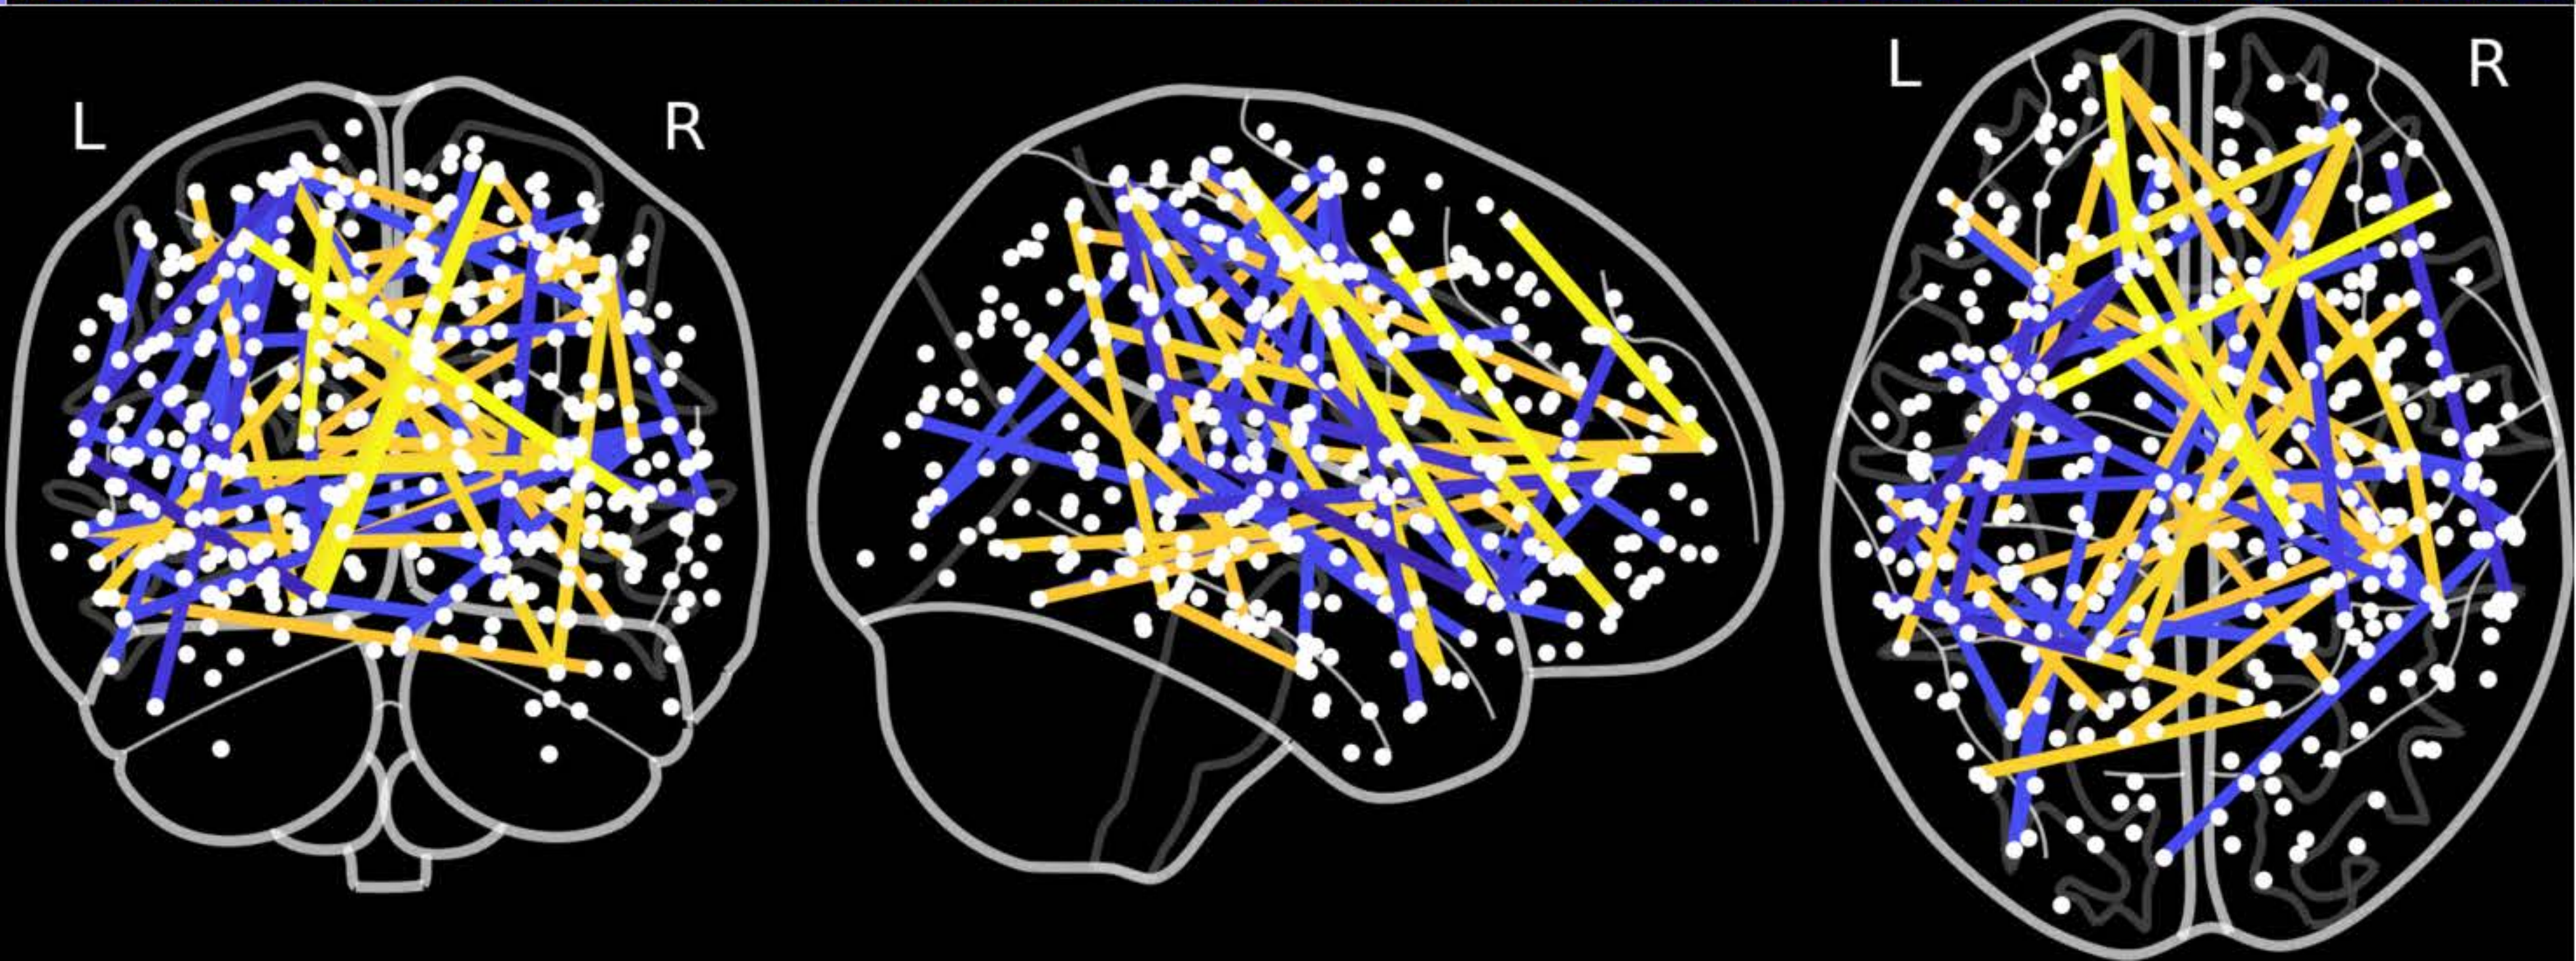



component\_67

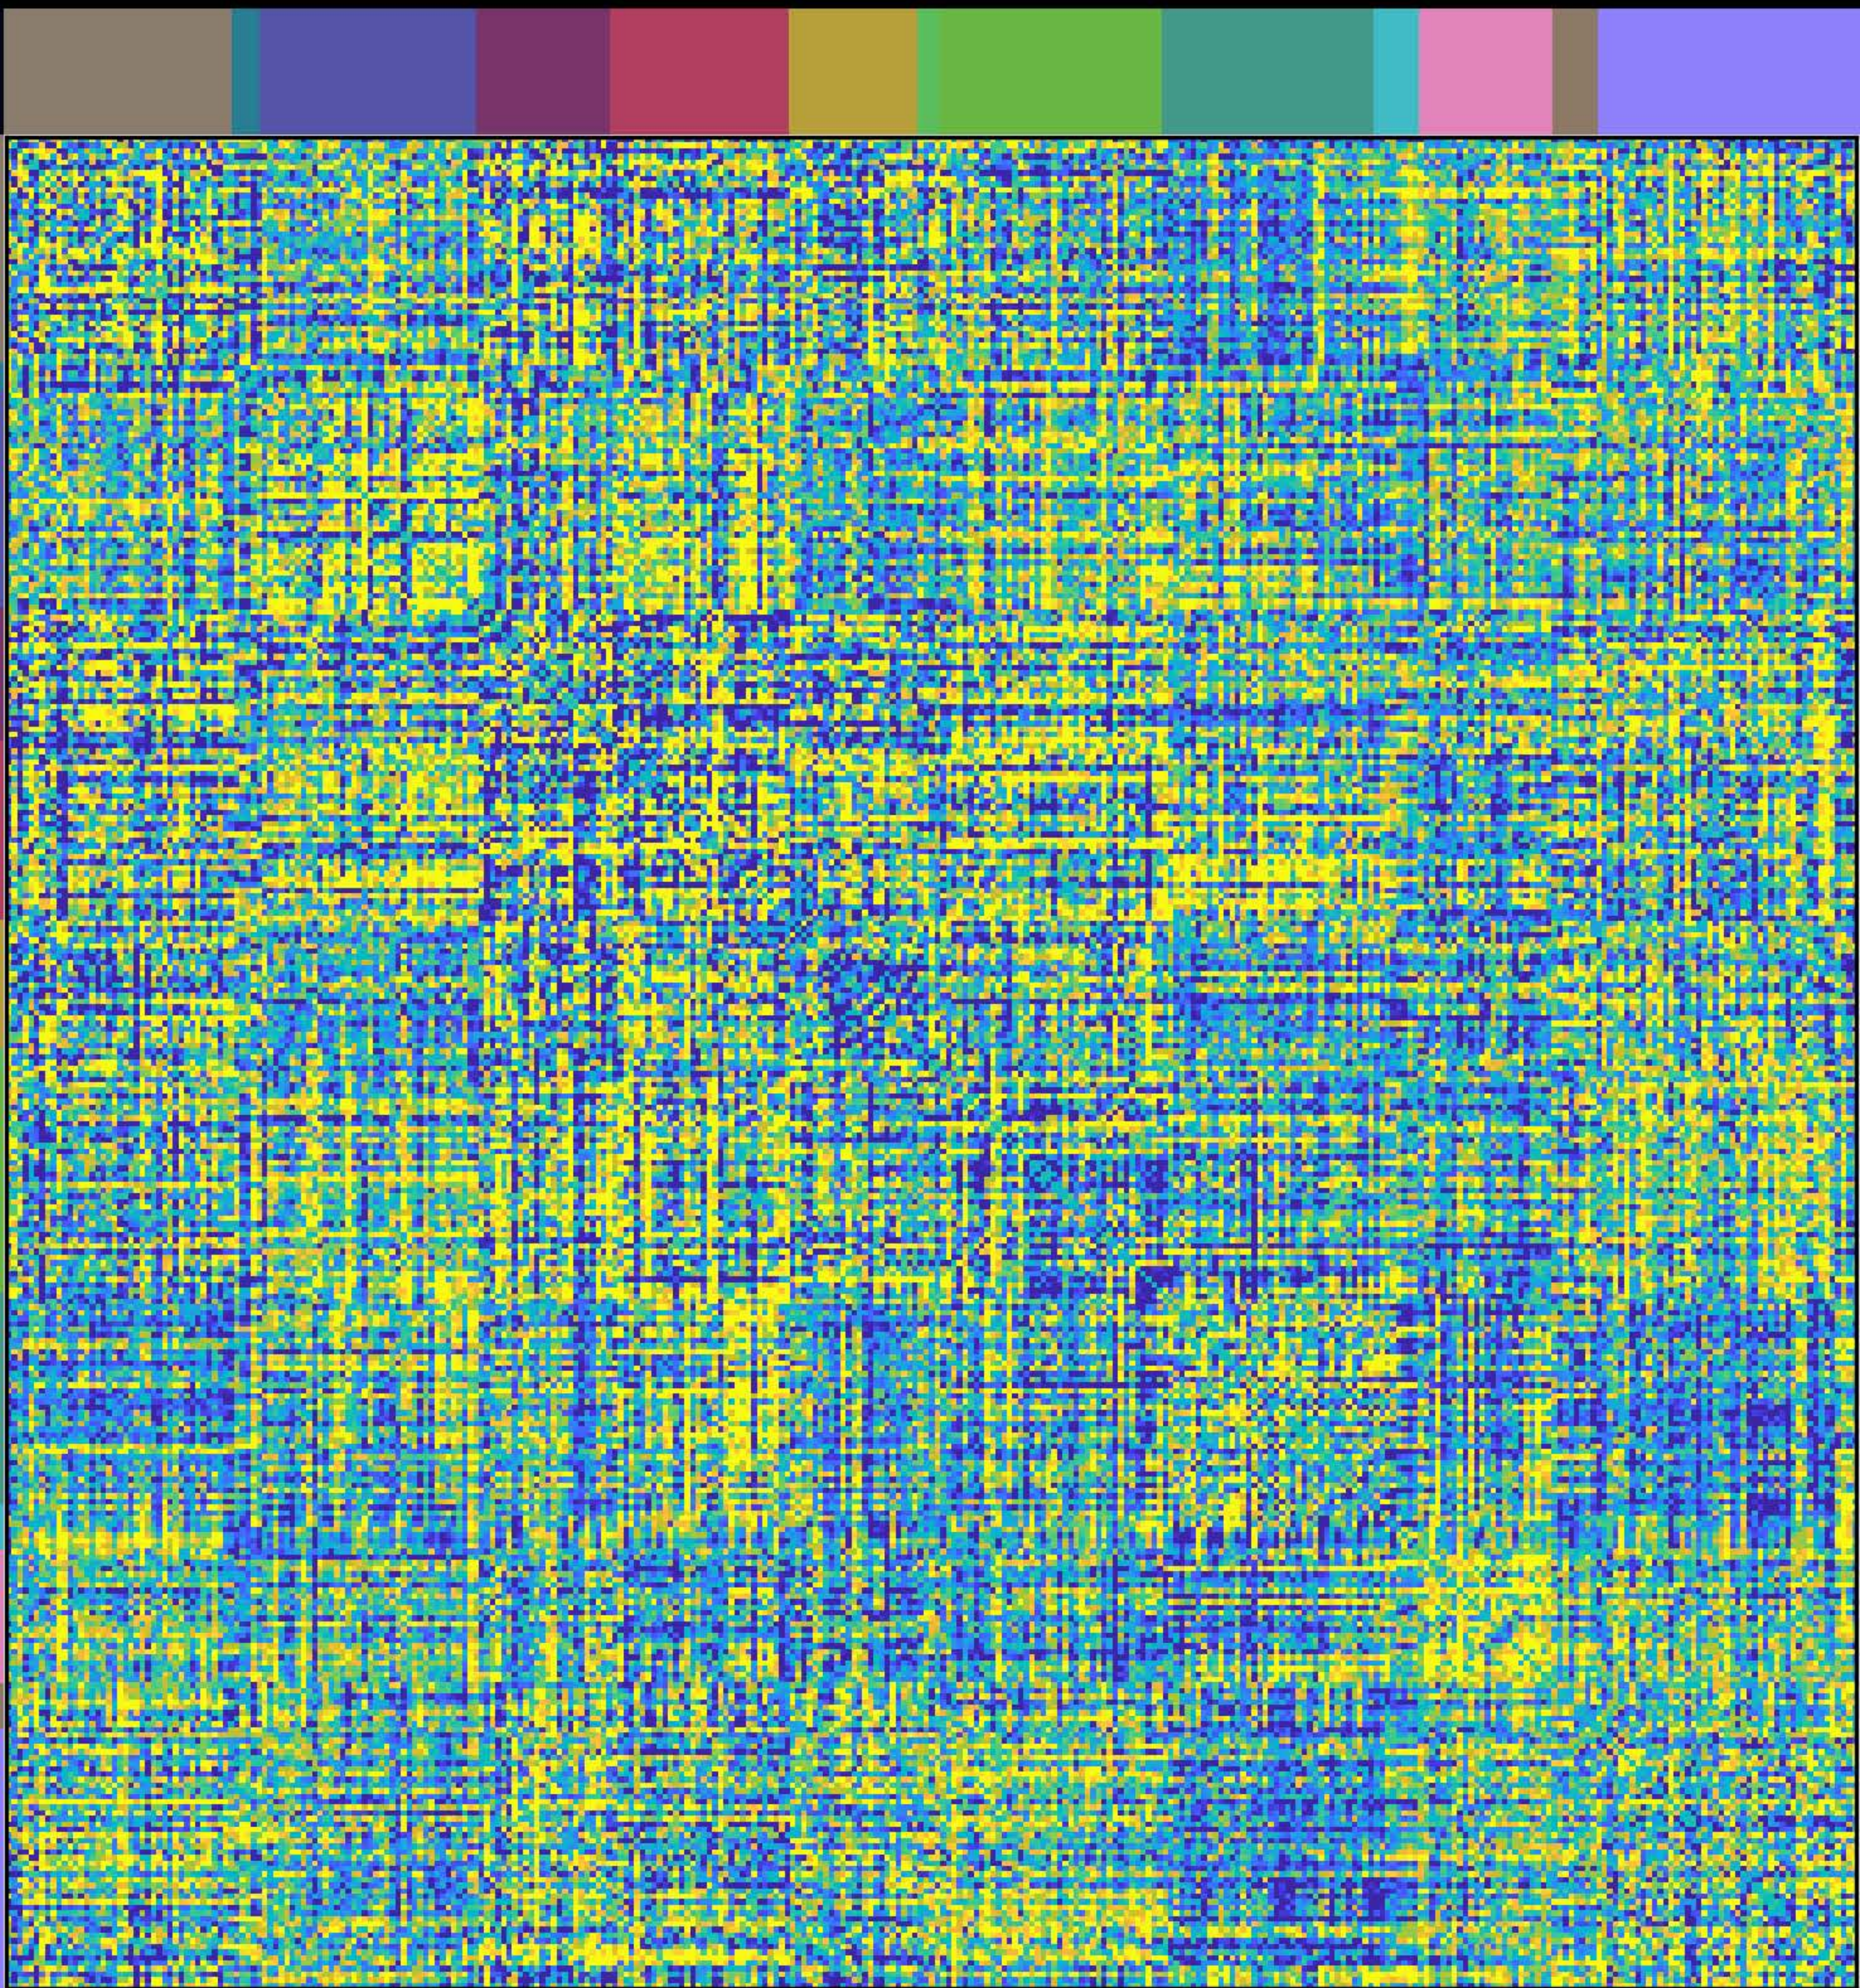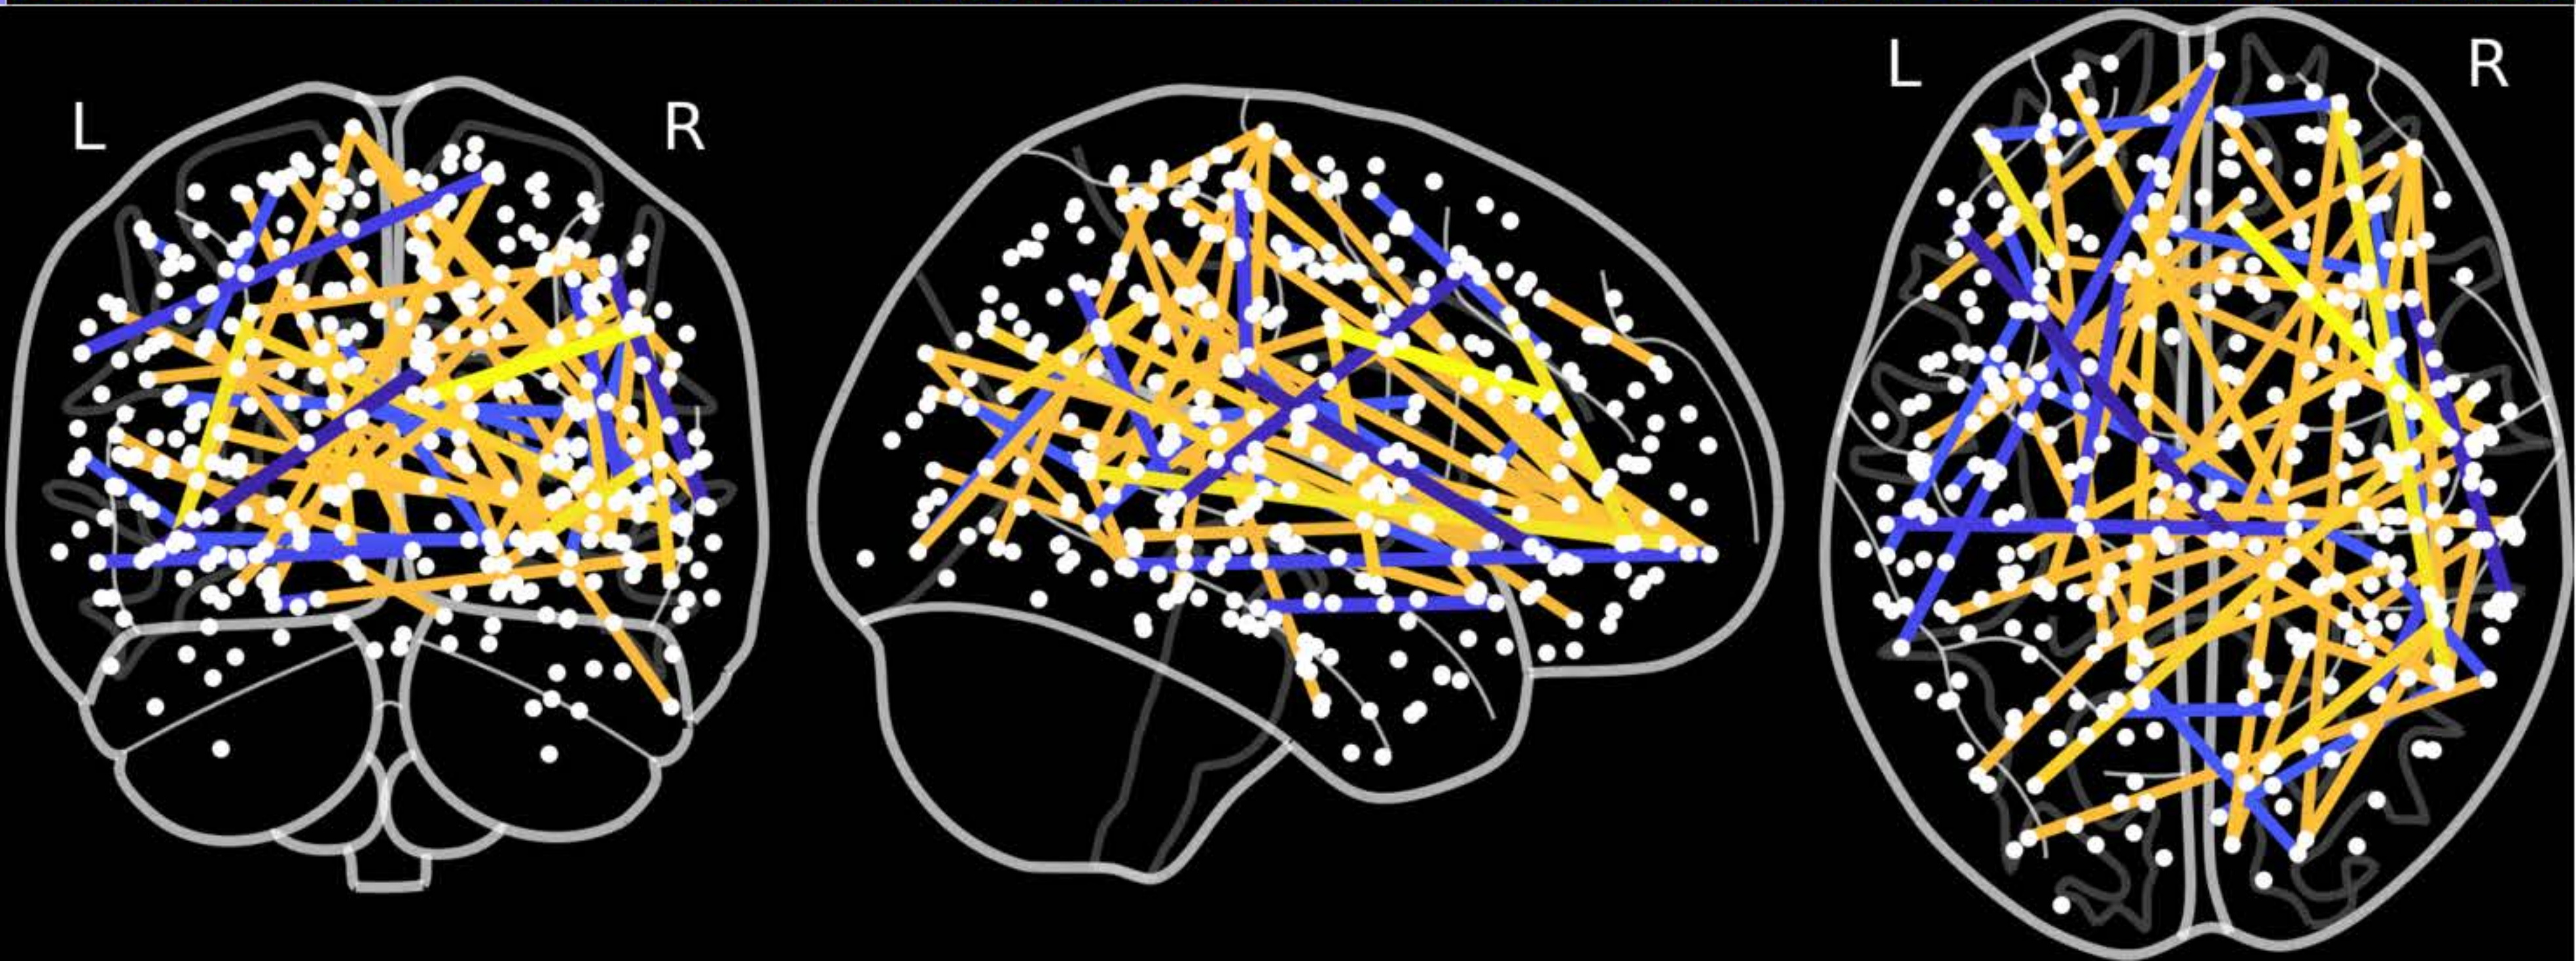



component\_68

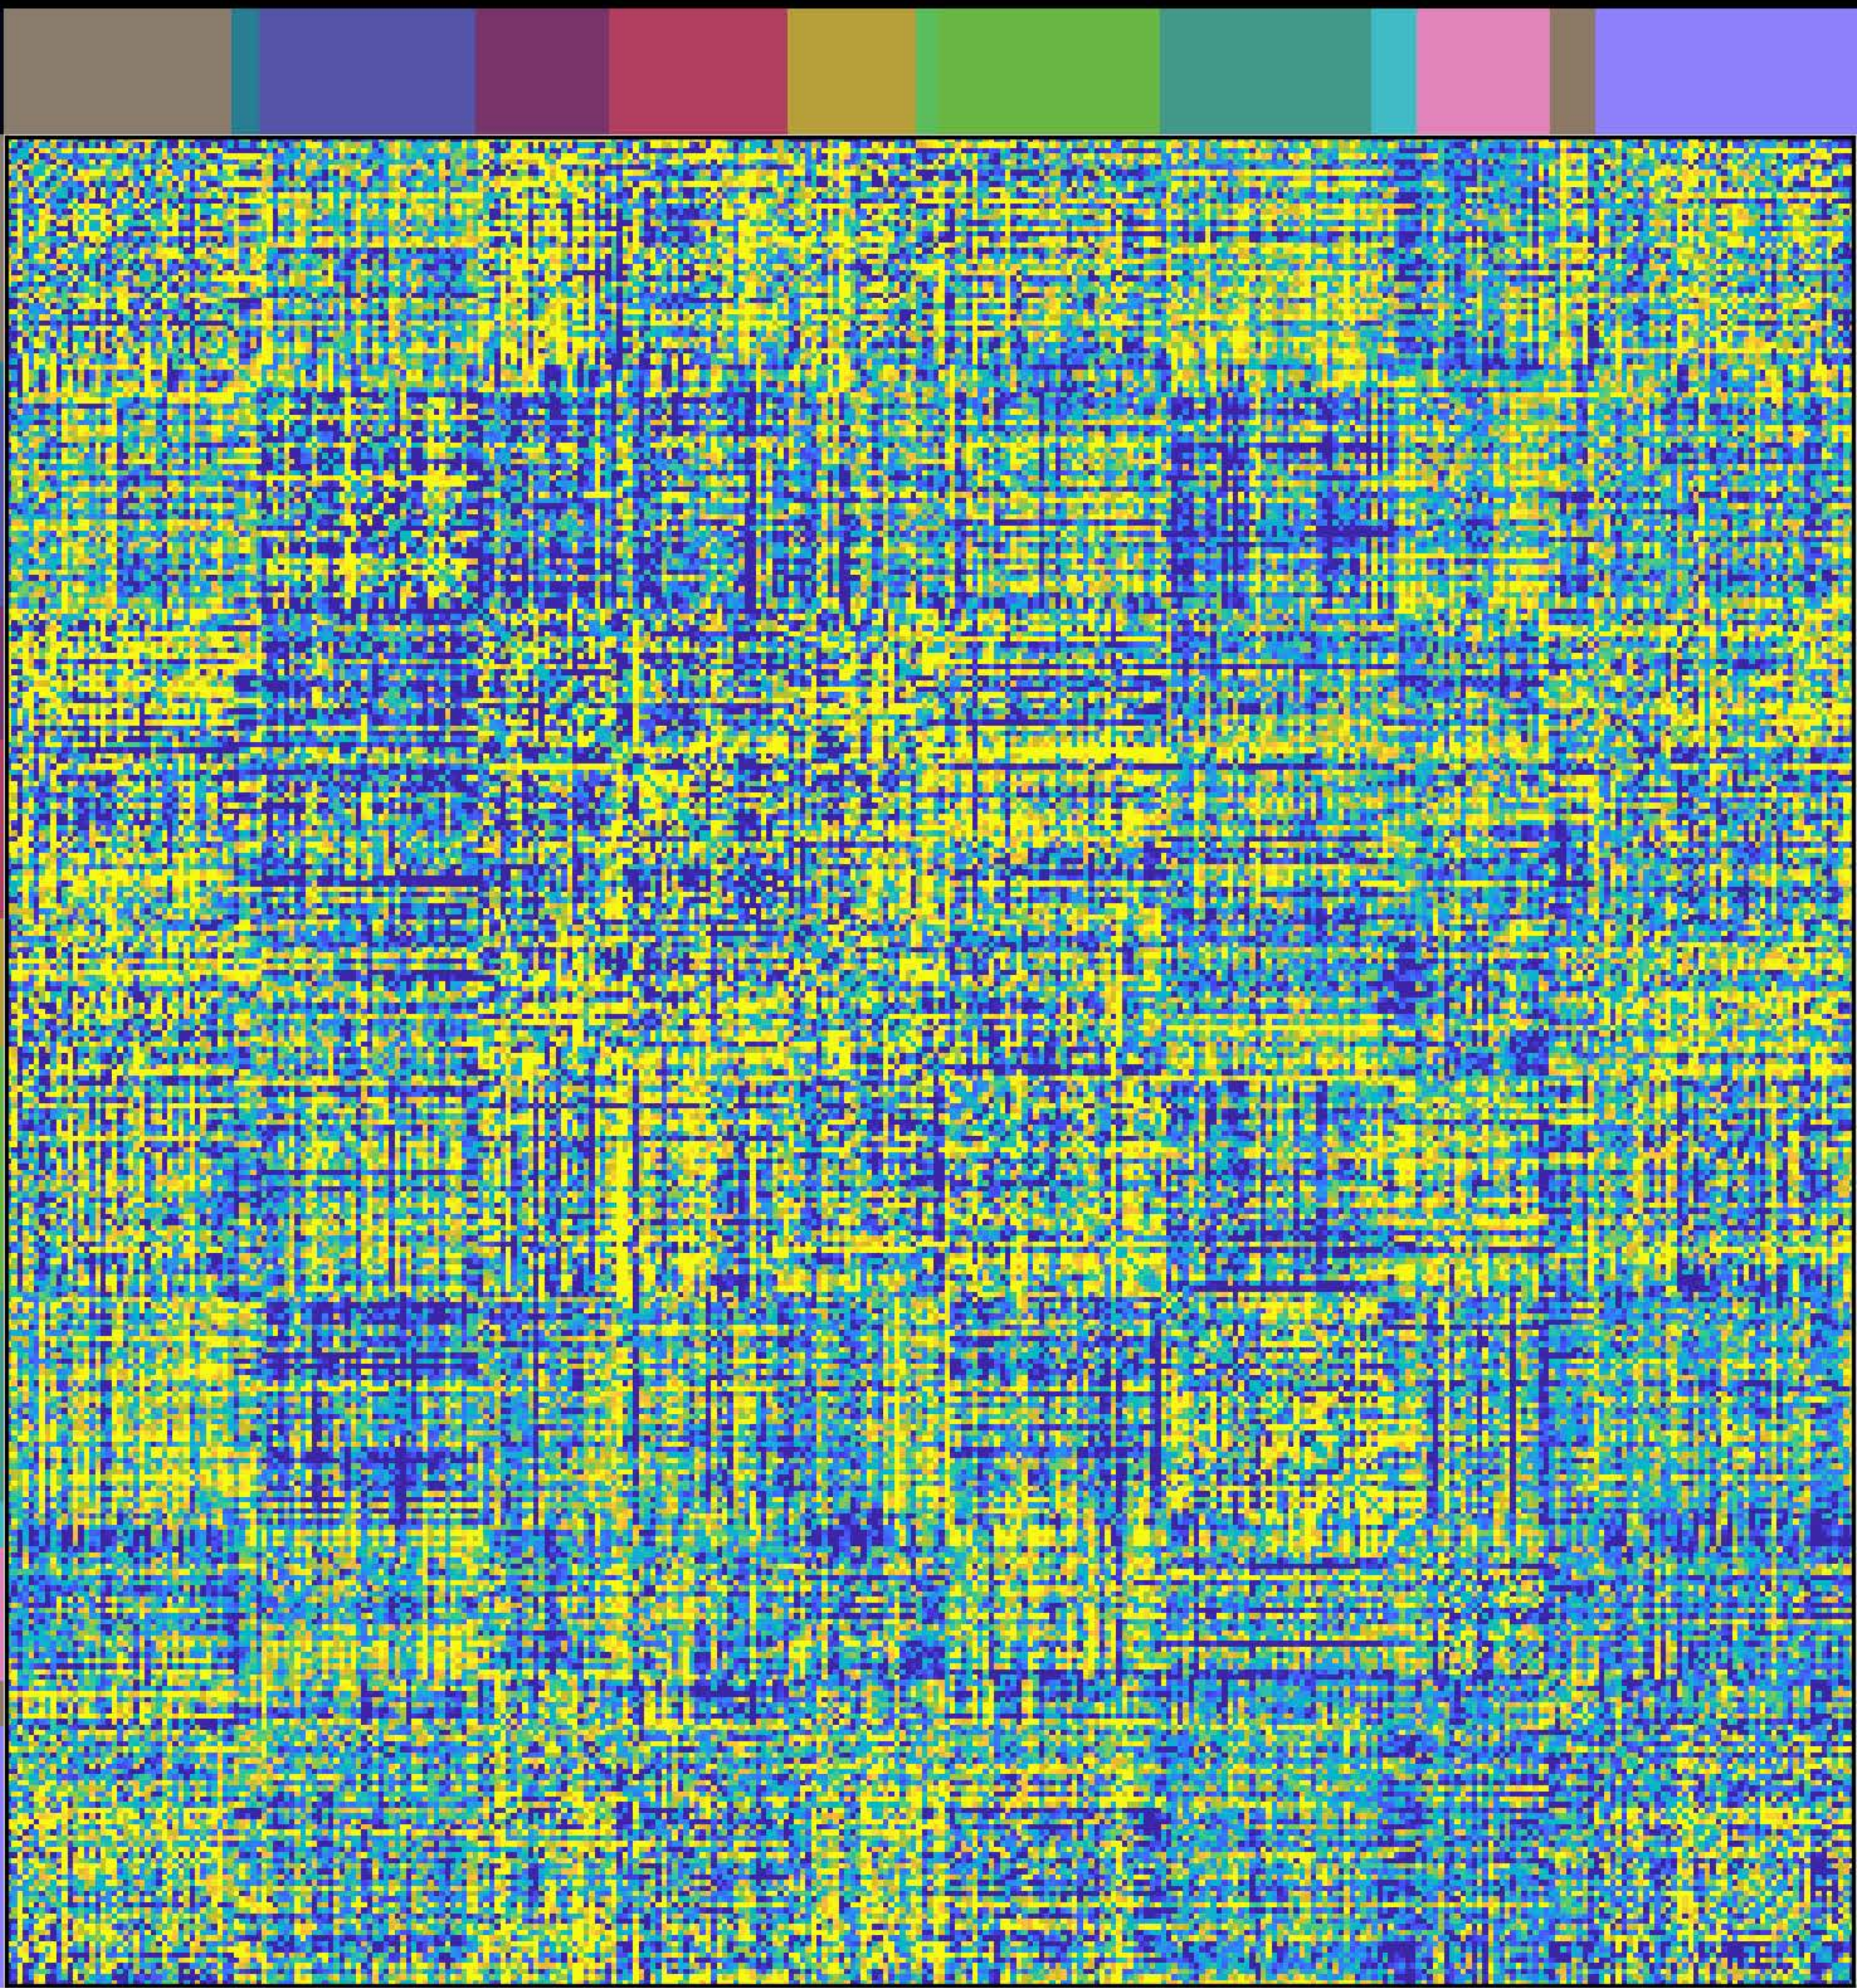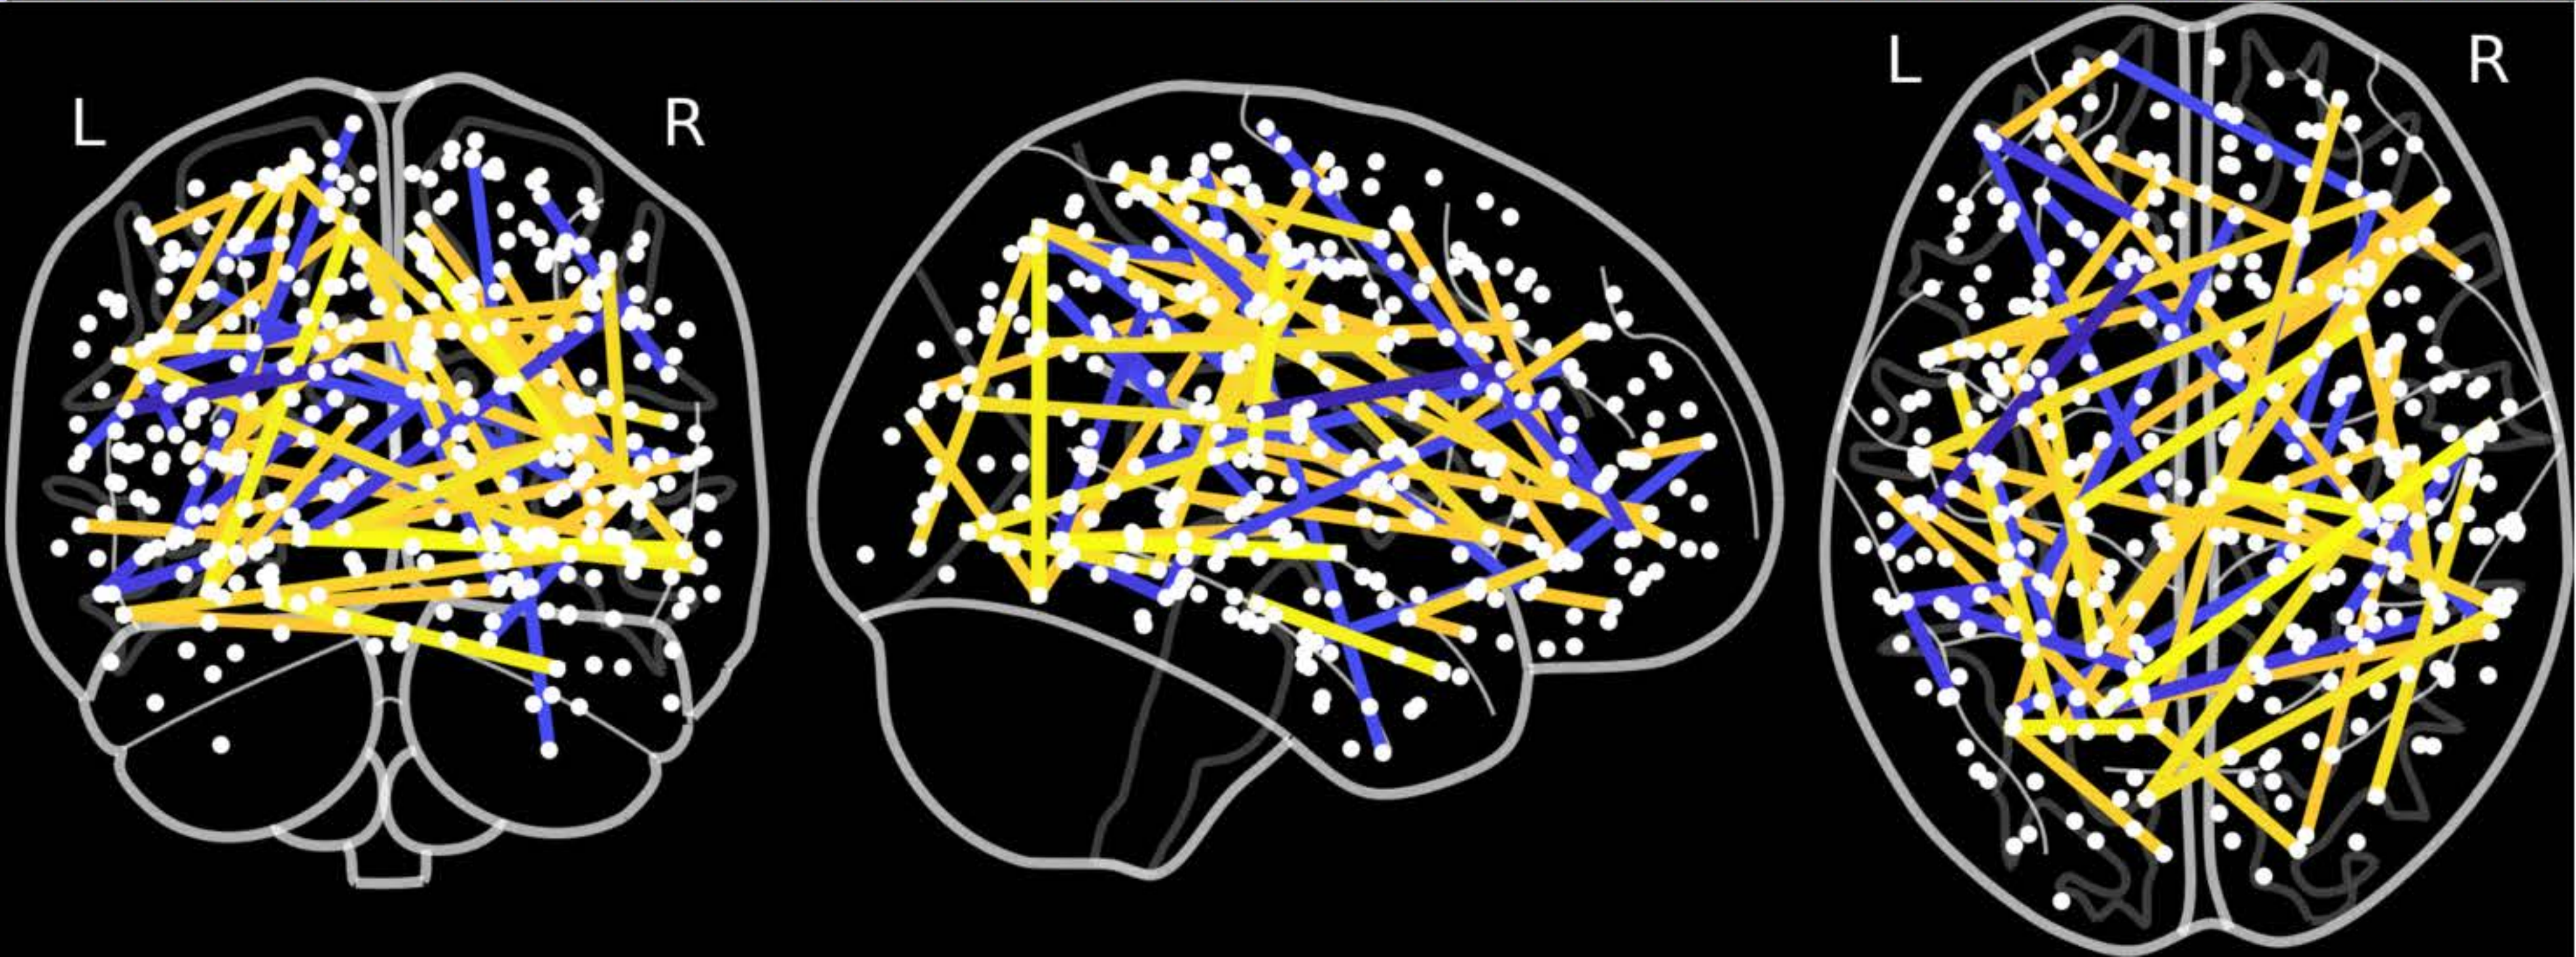



component\_69

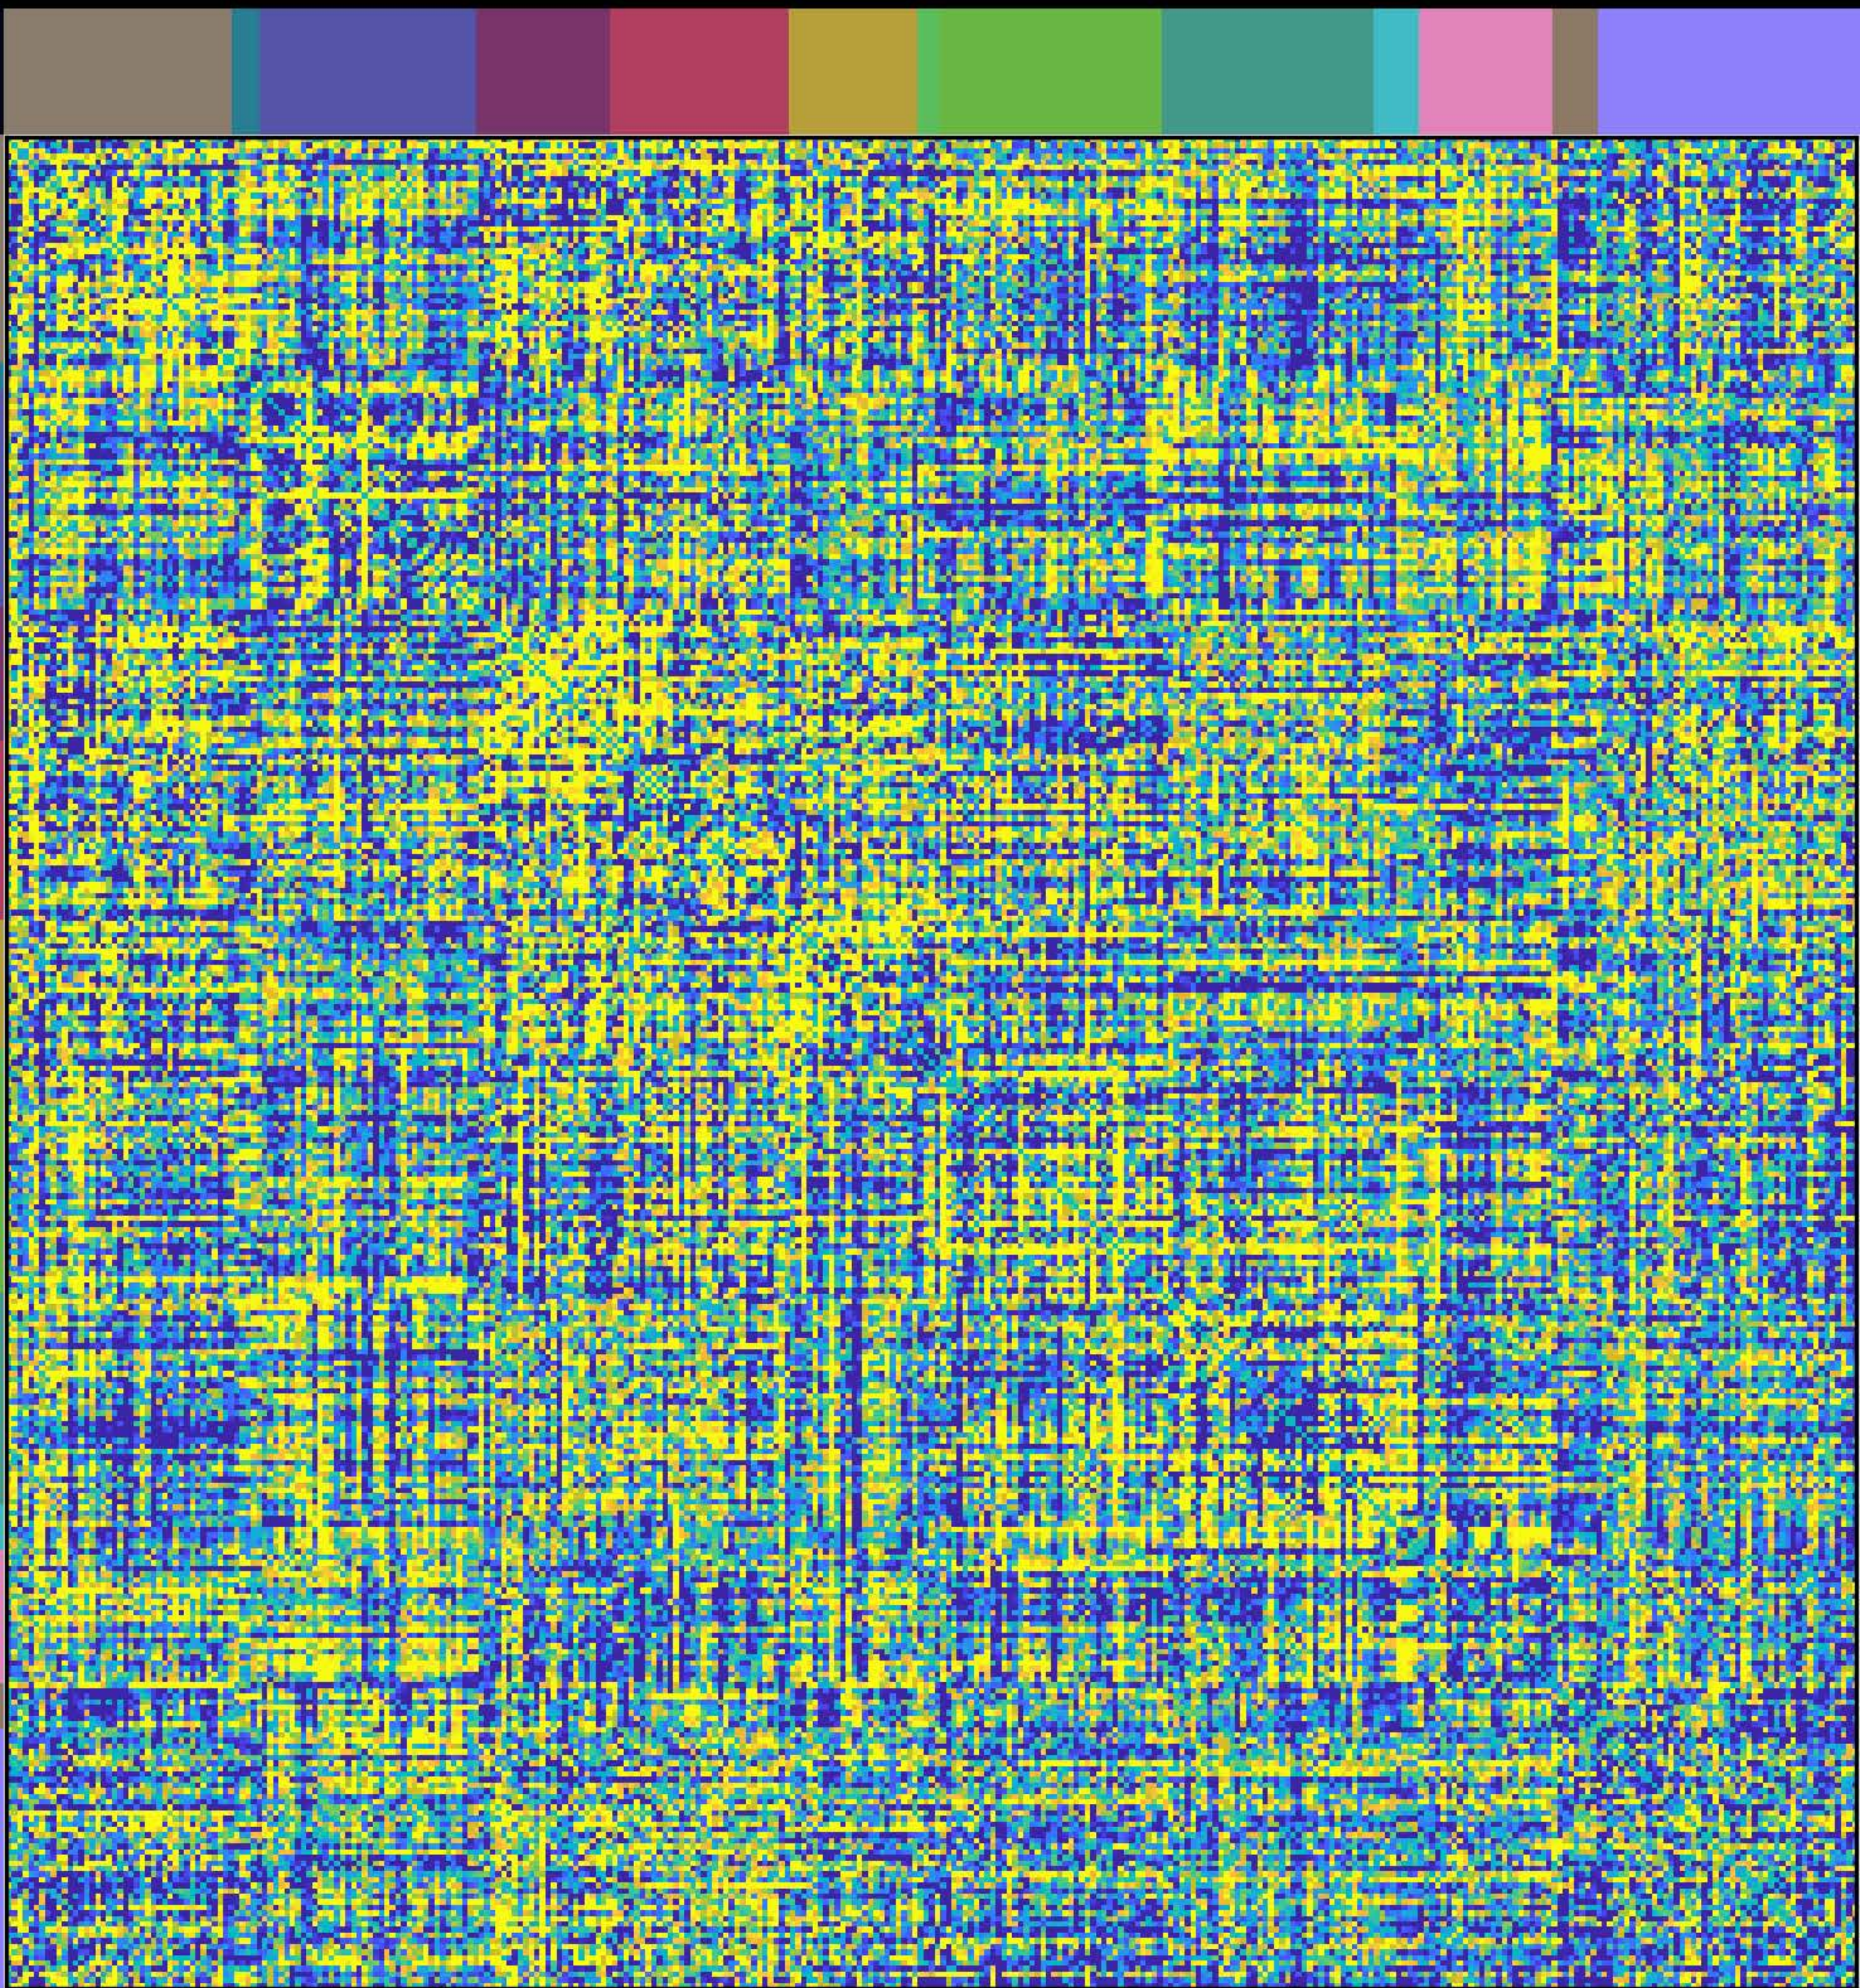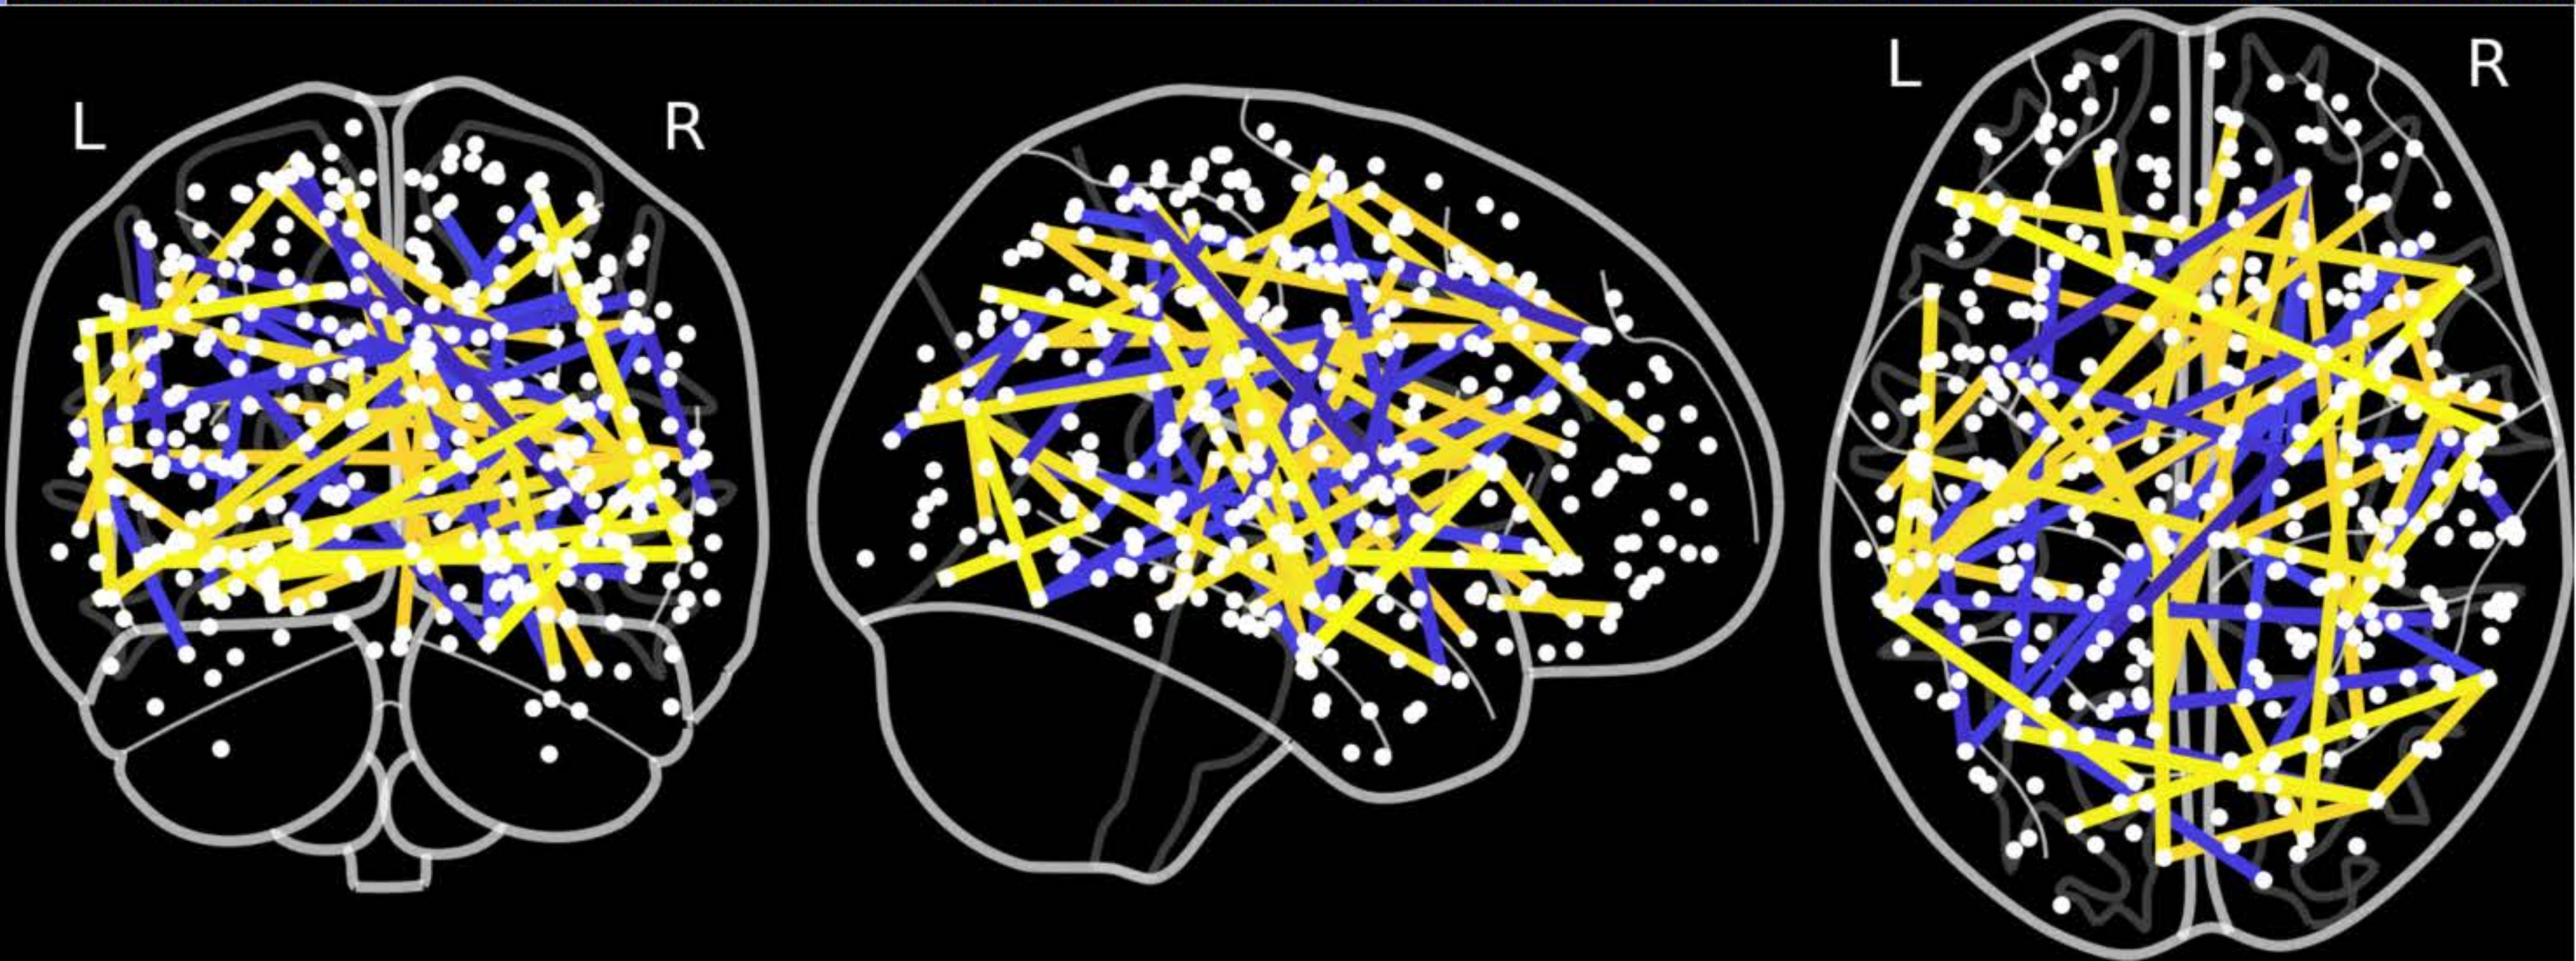



component\_70

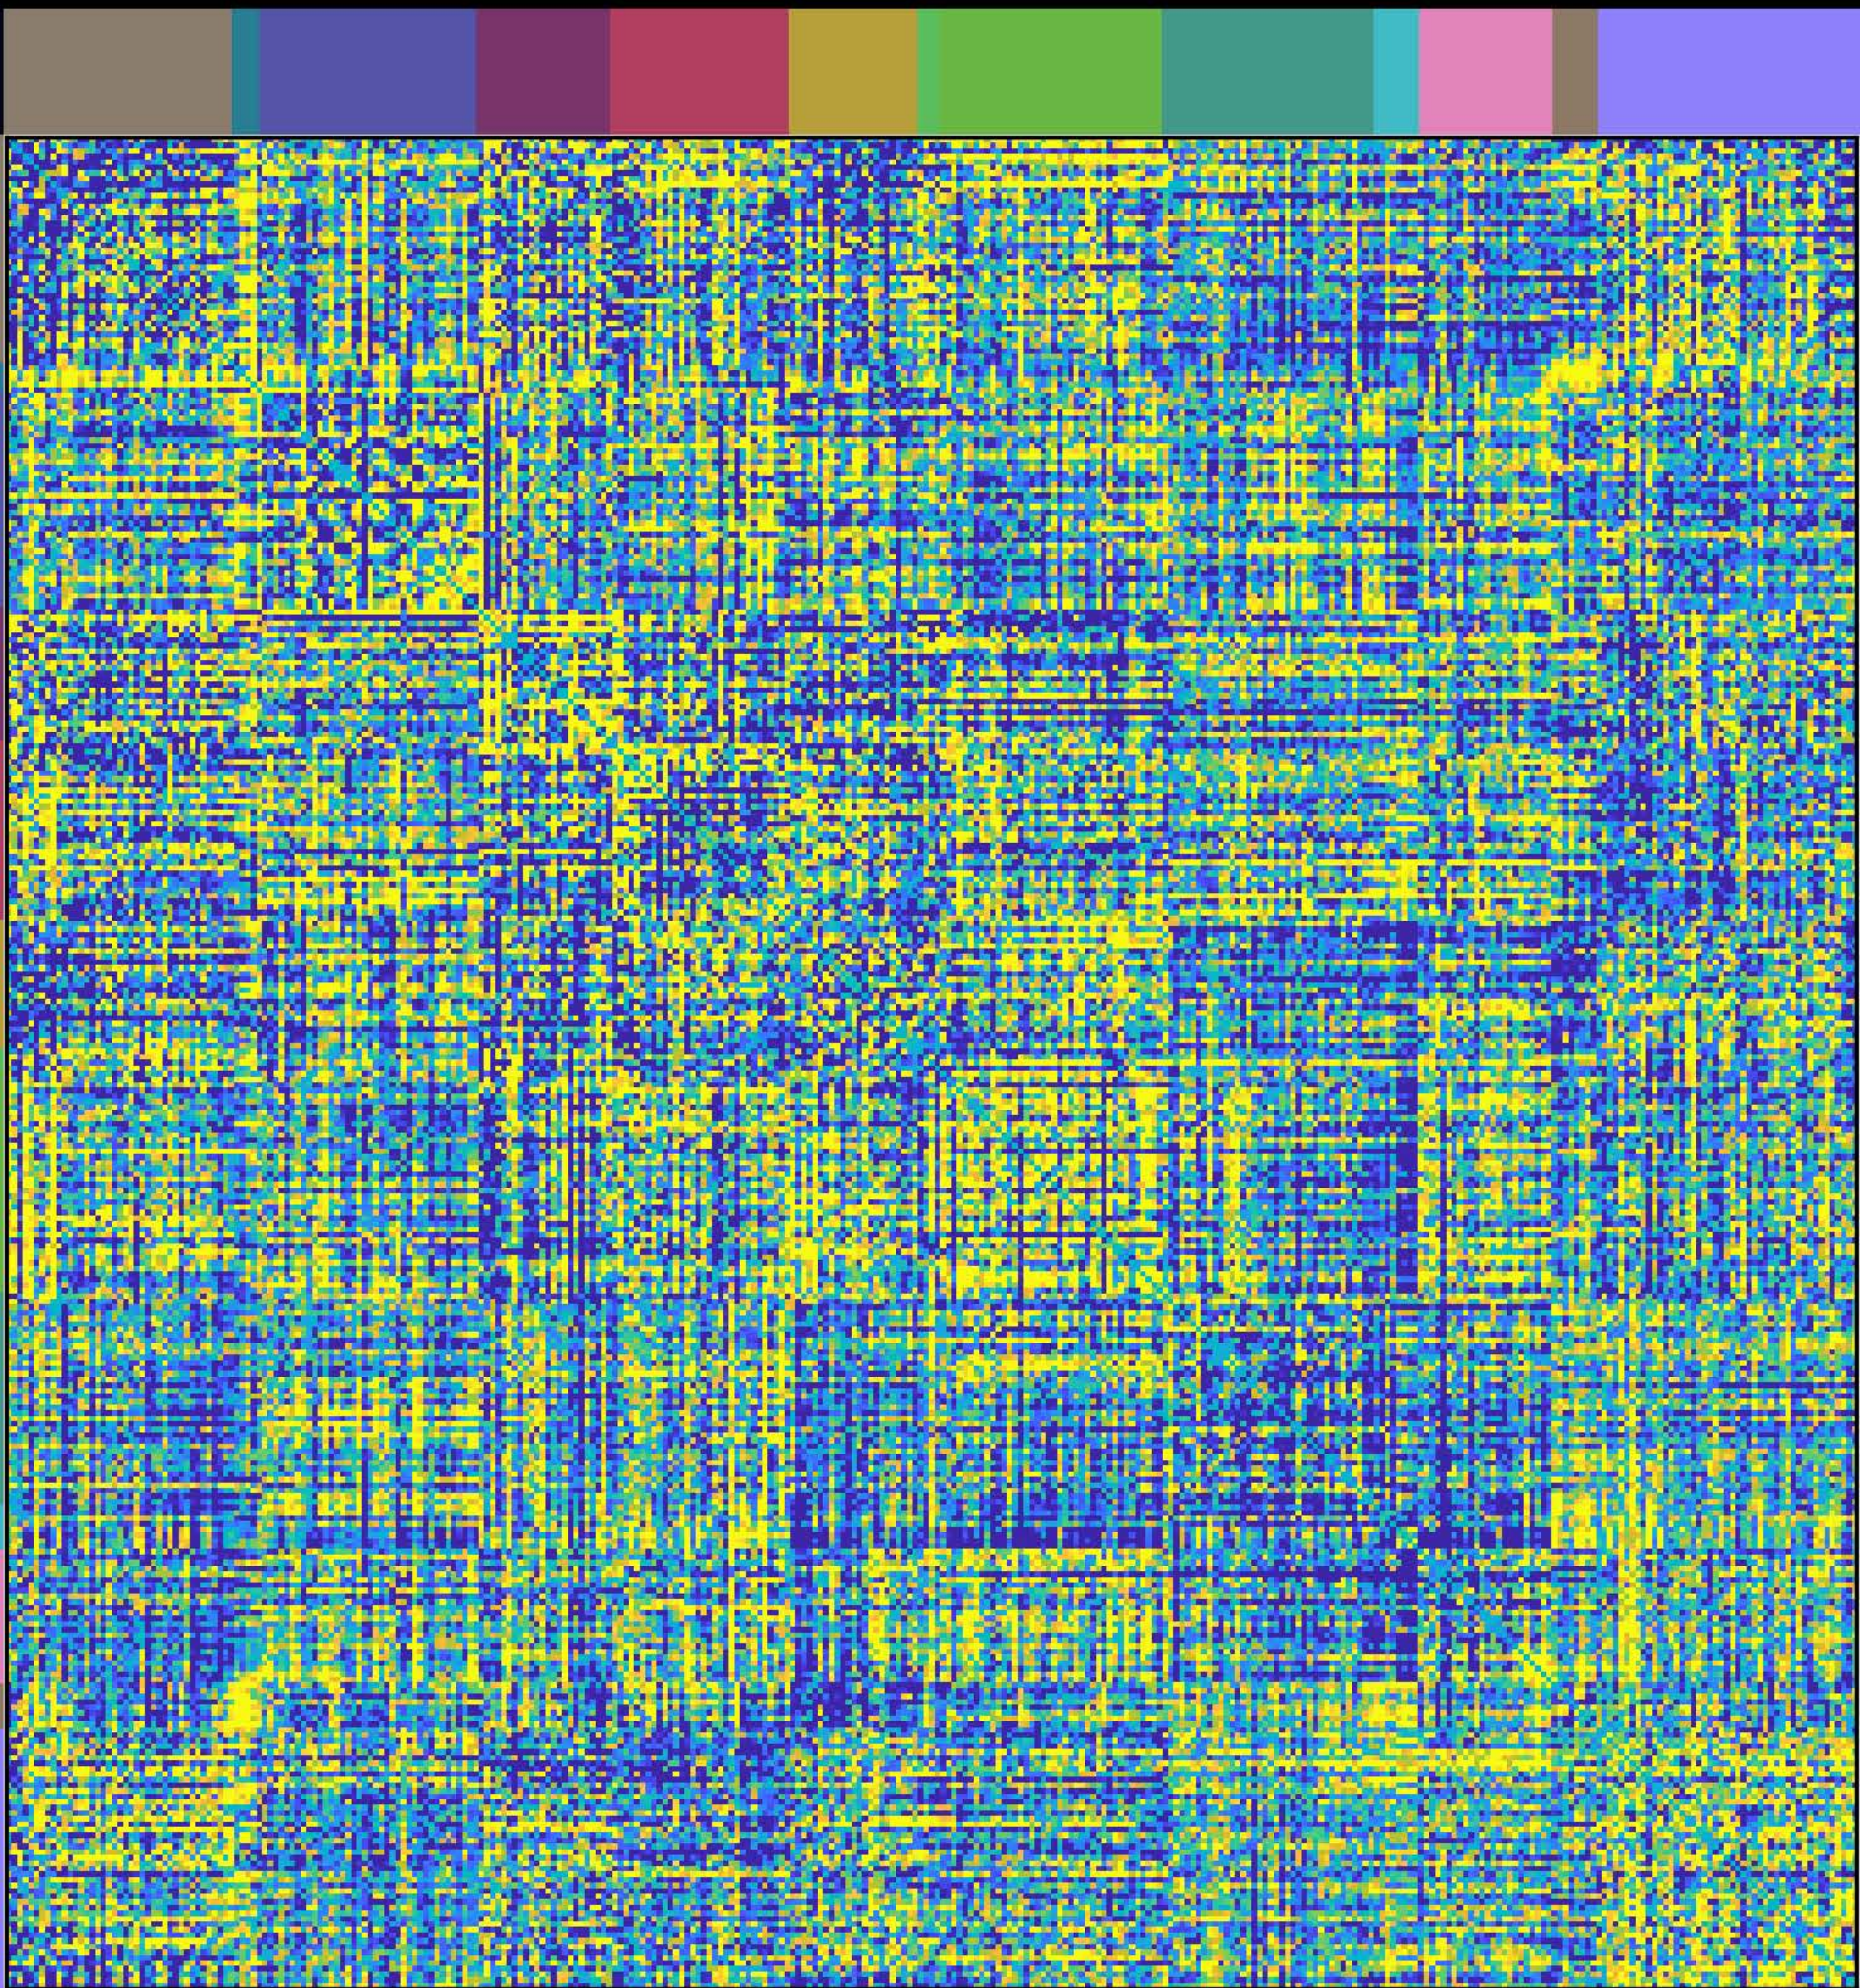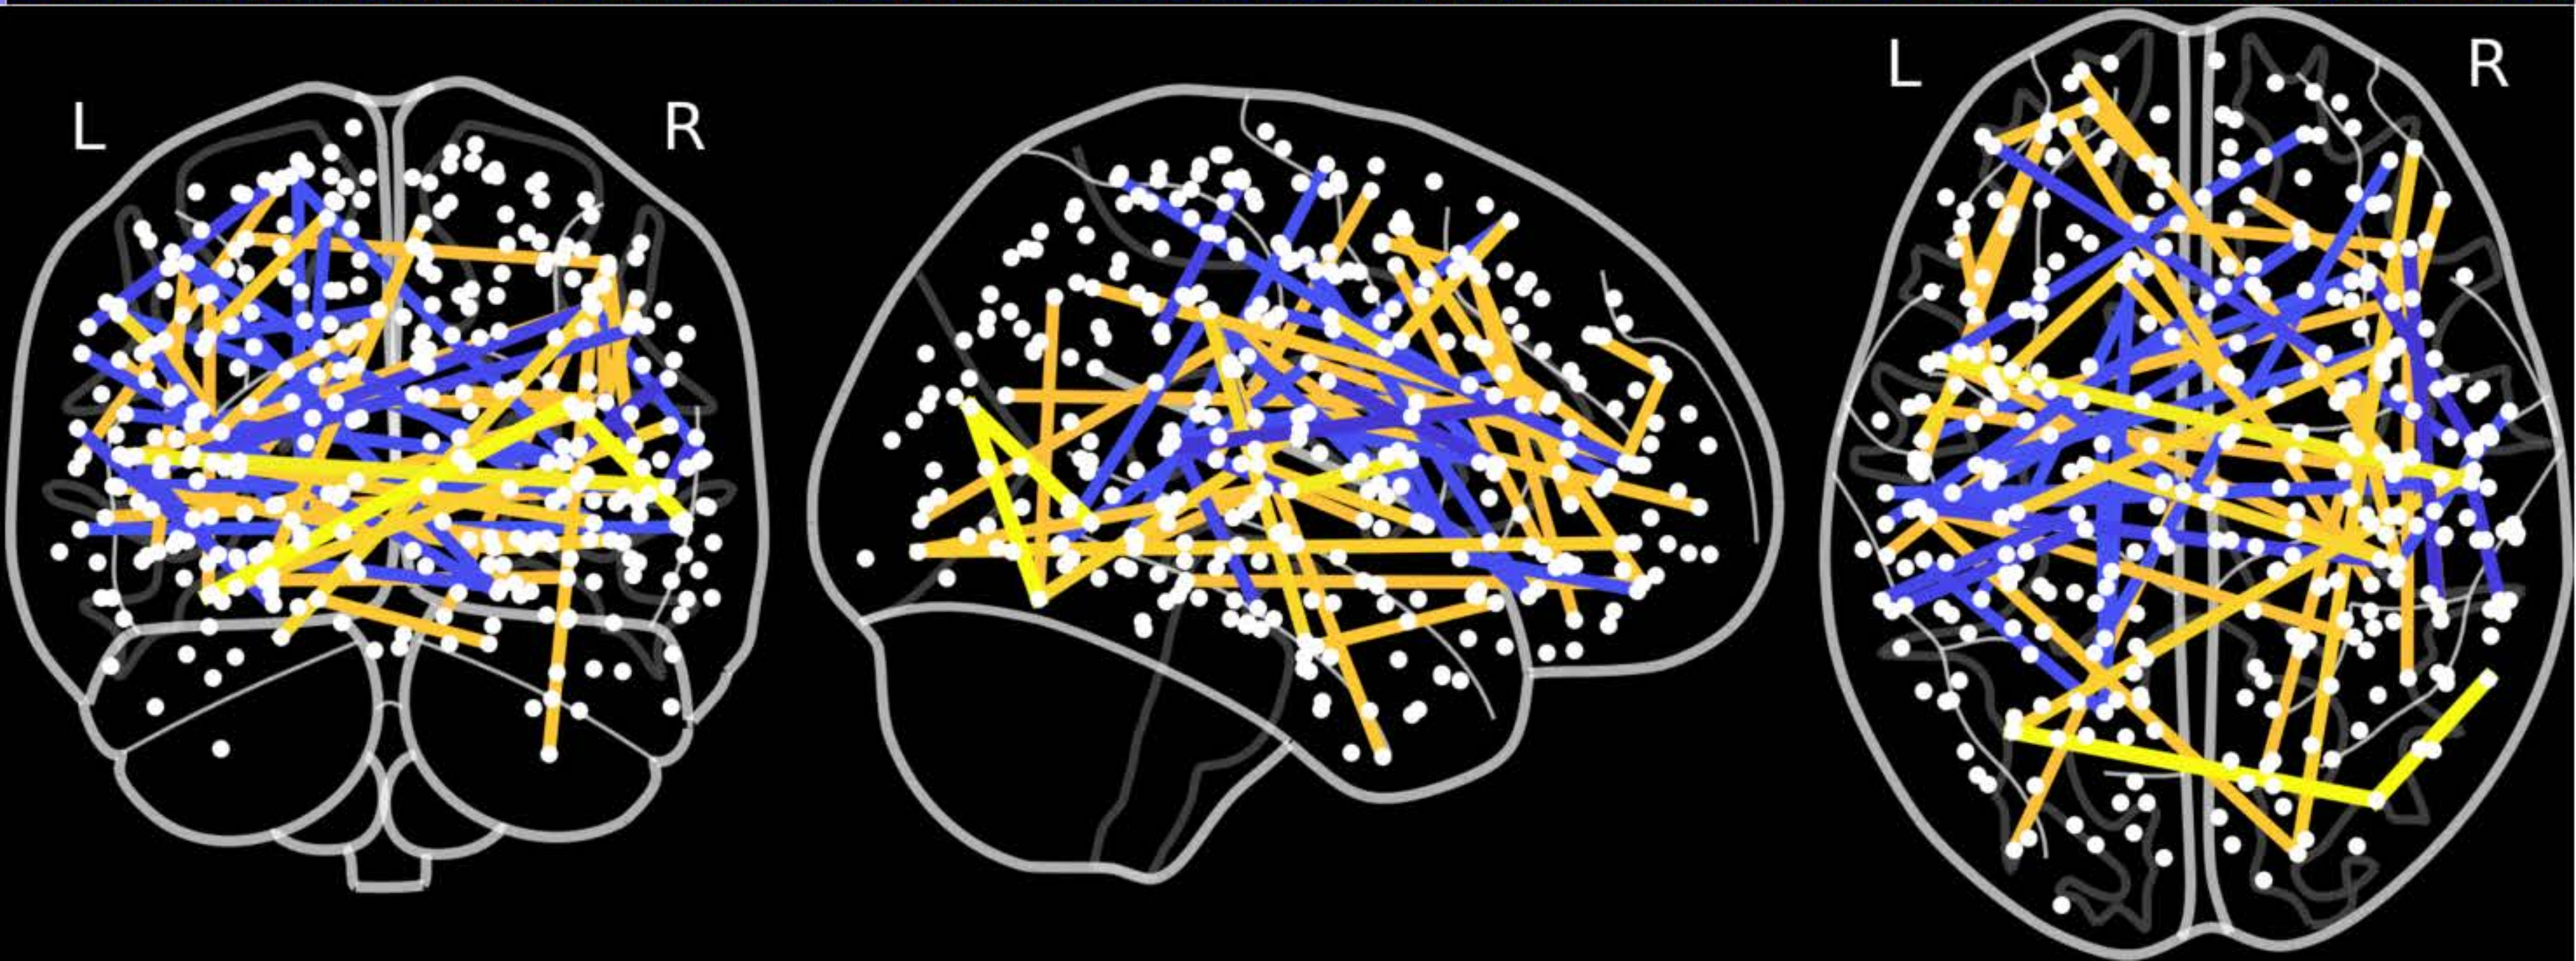



component\_71

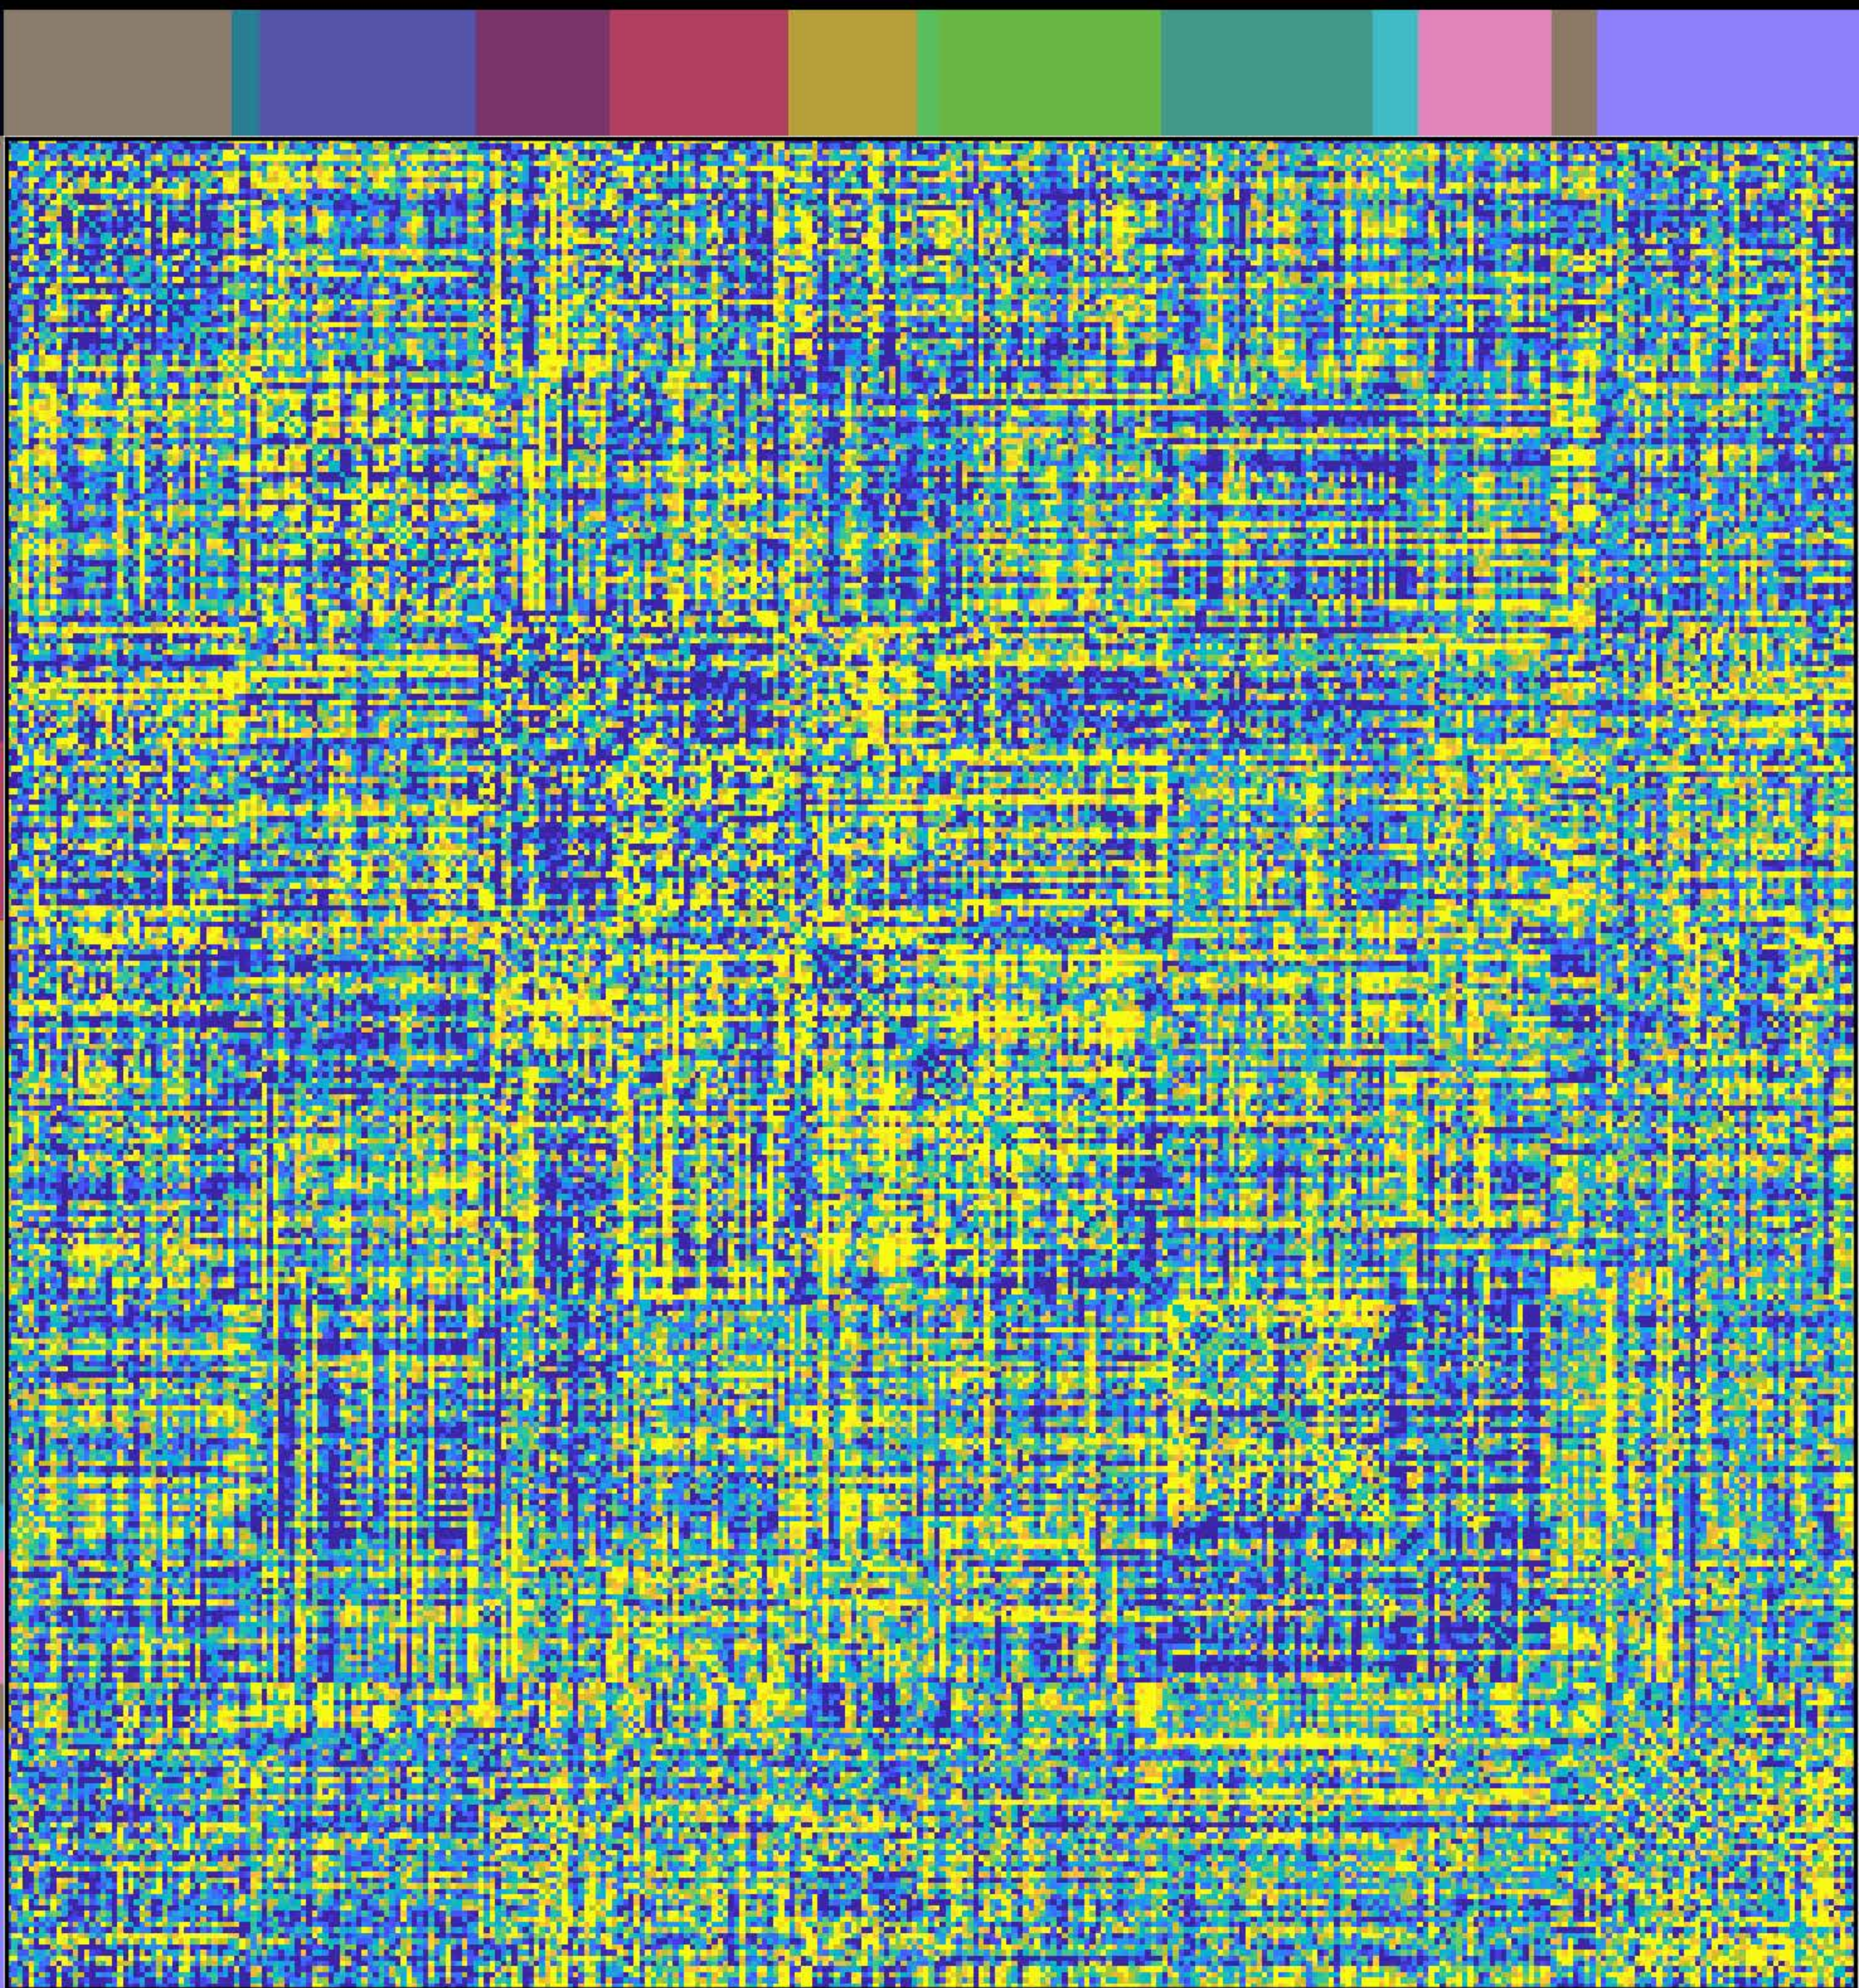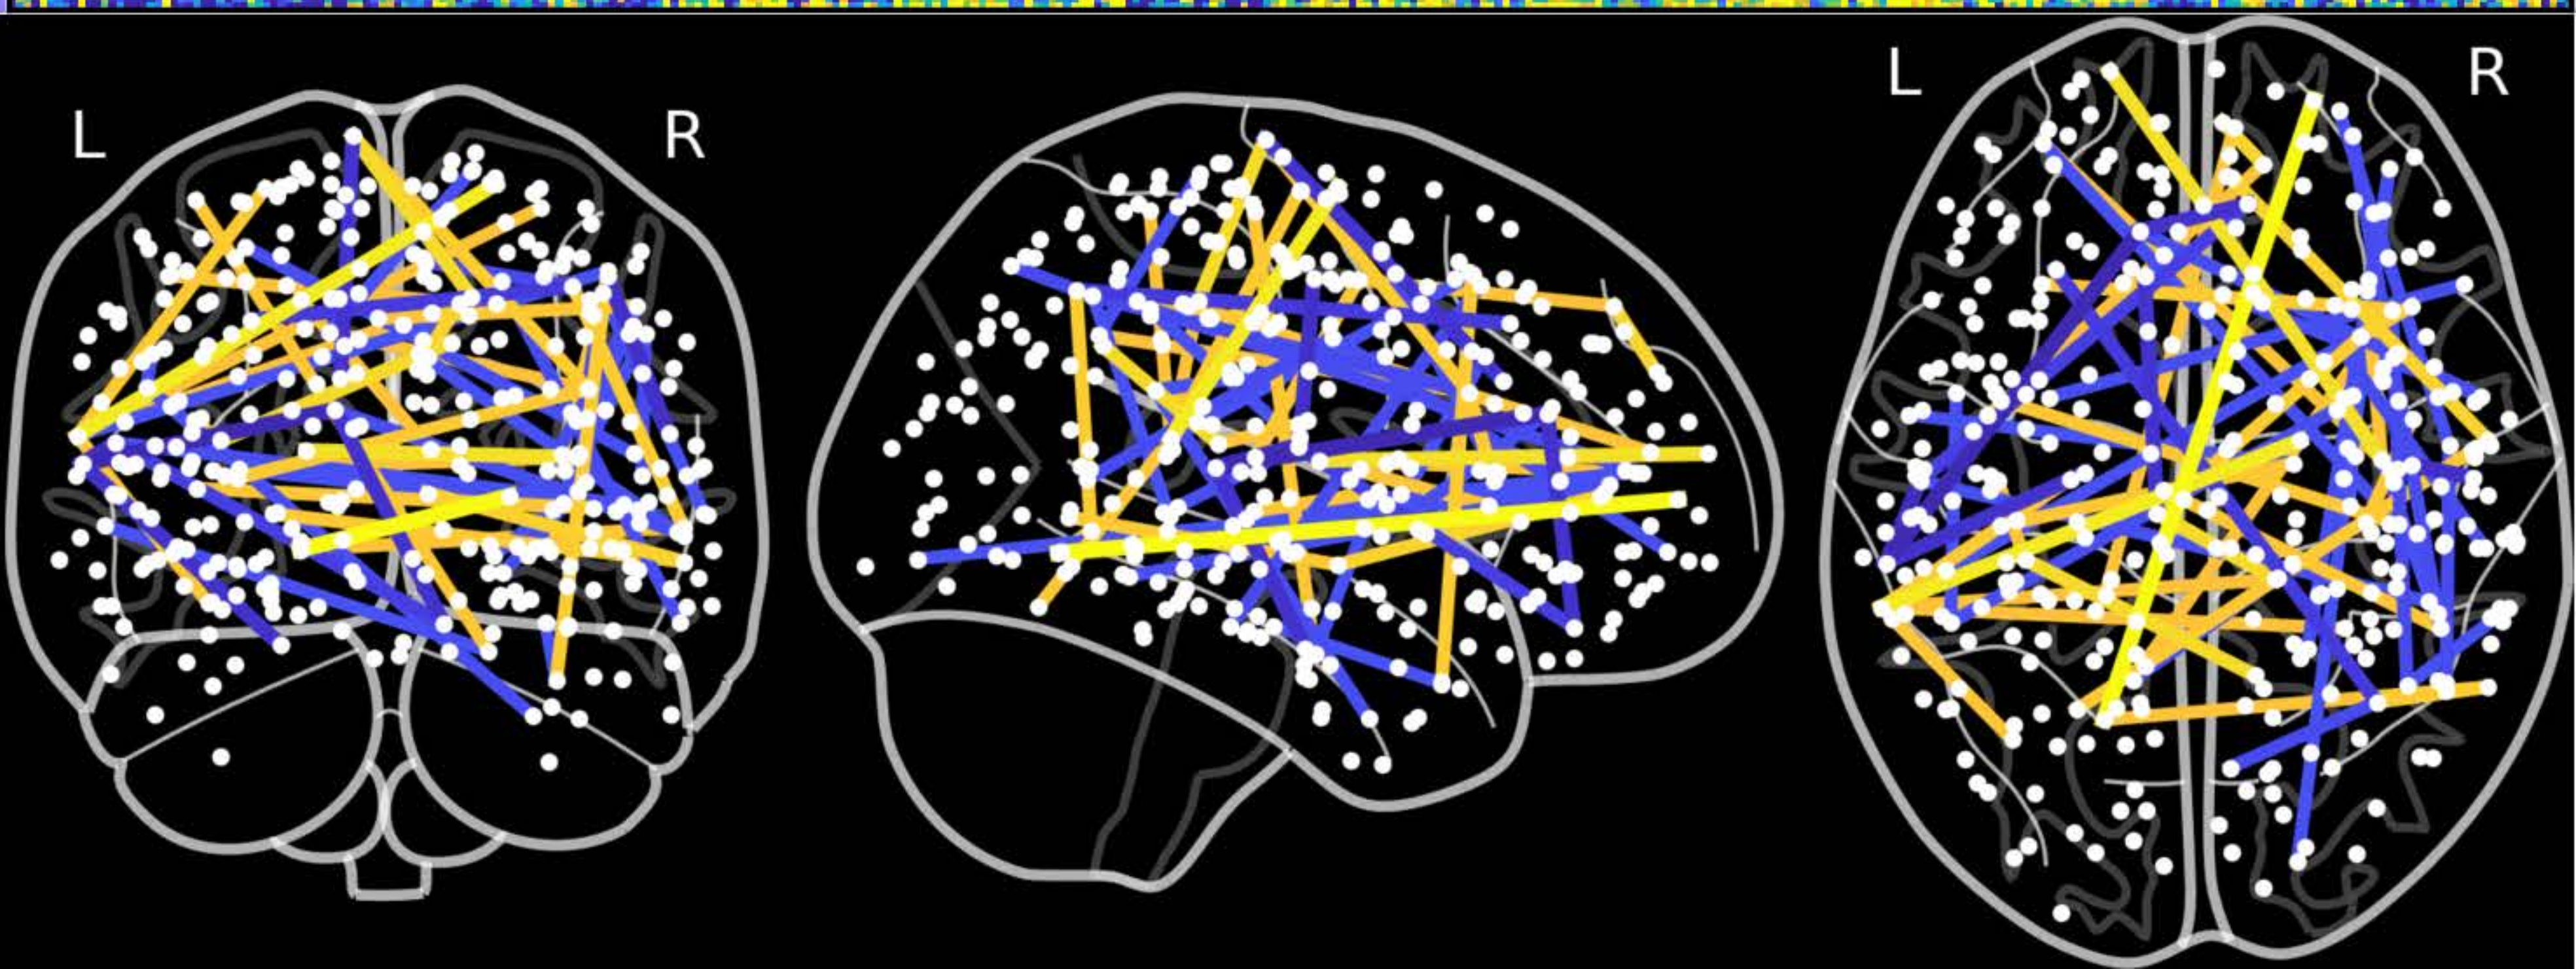



component\_72

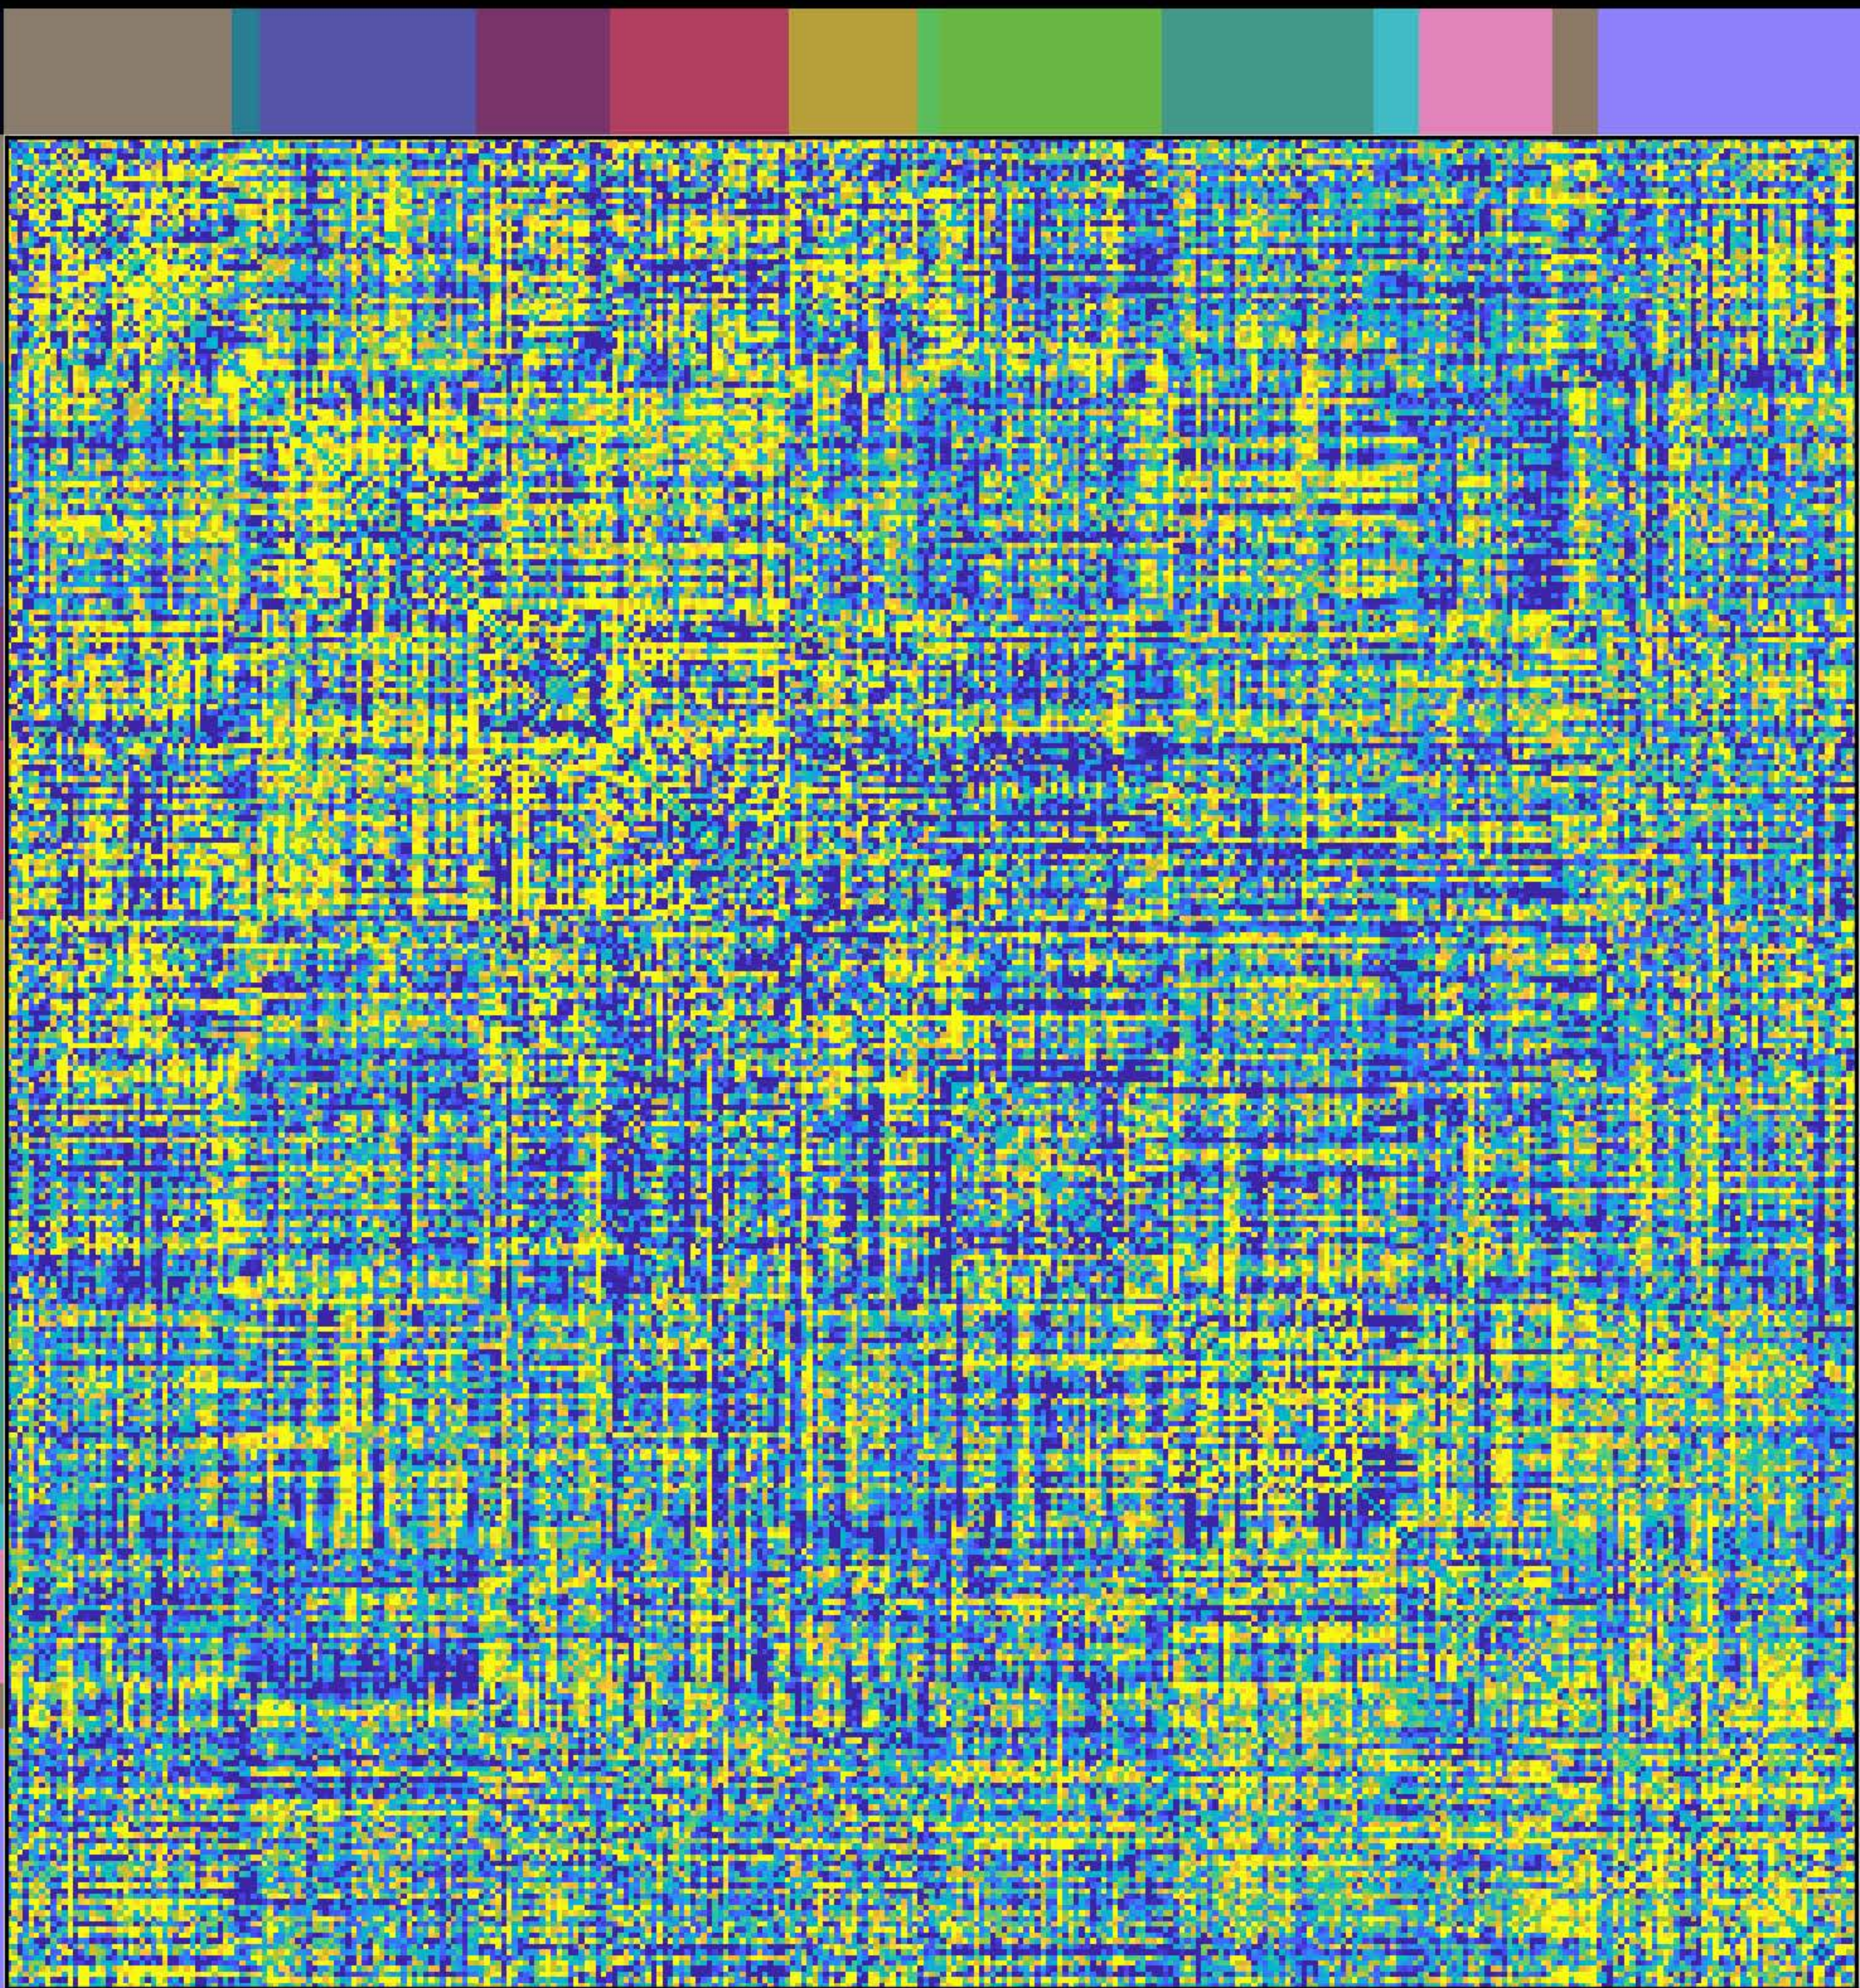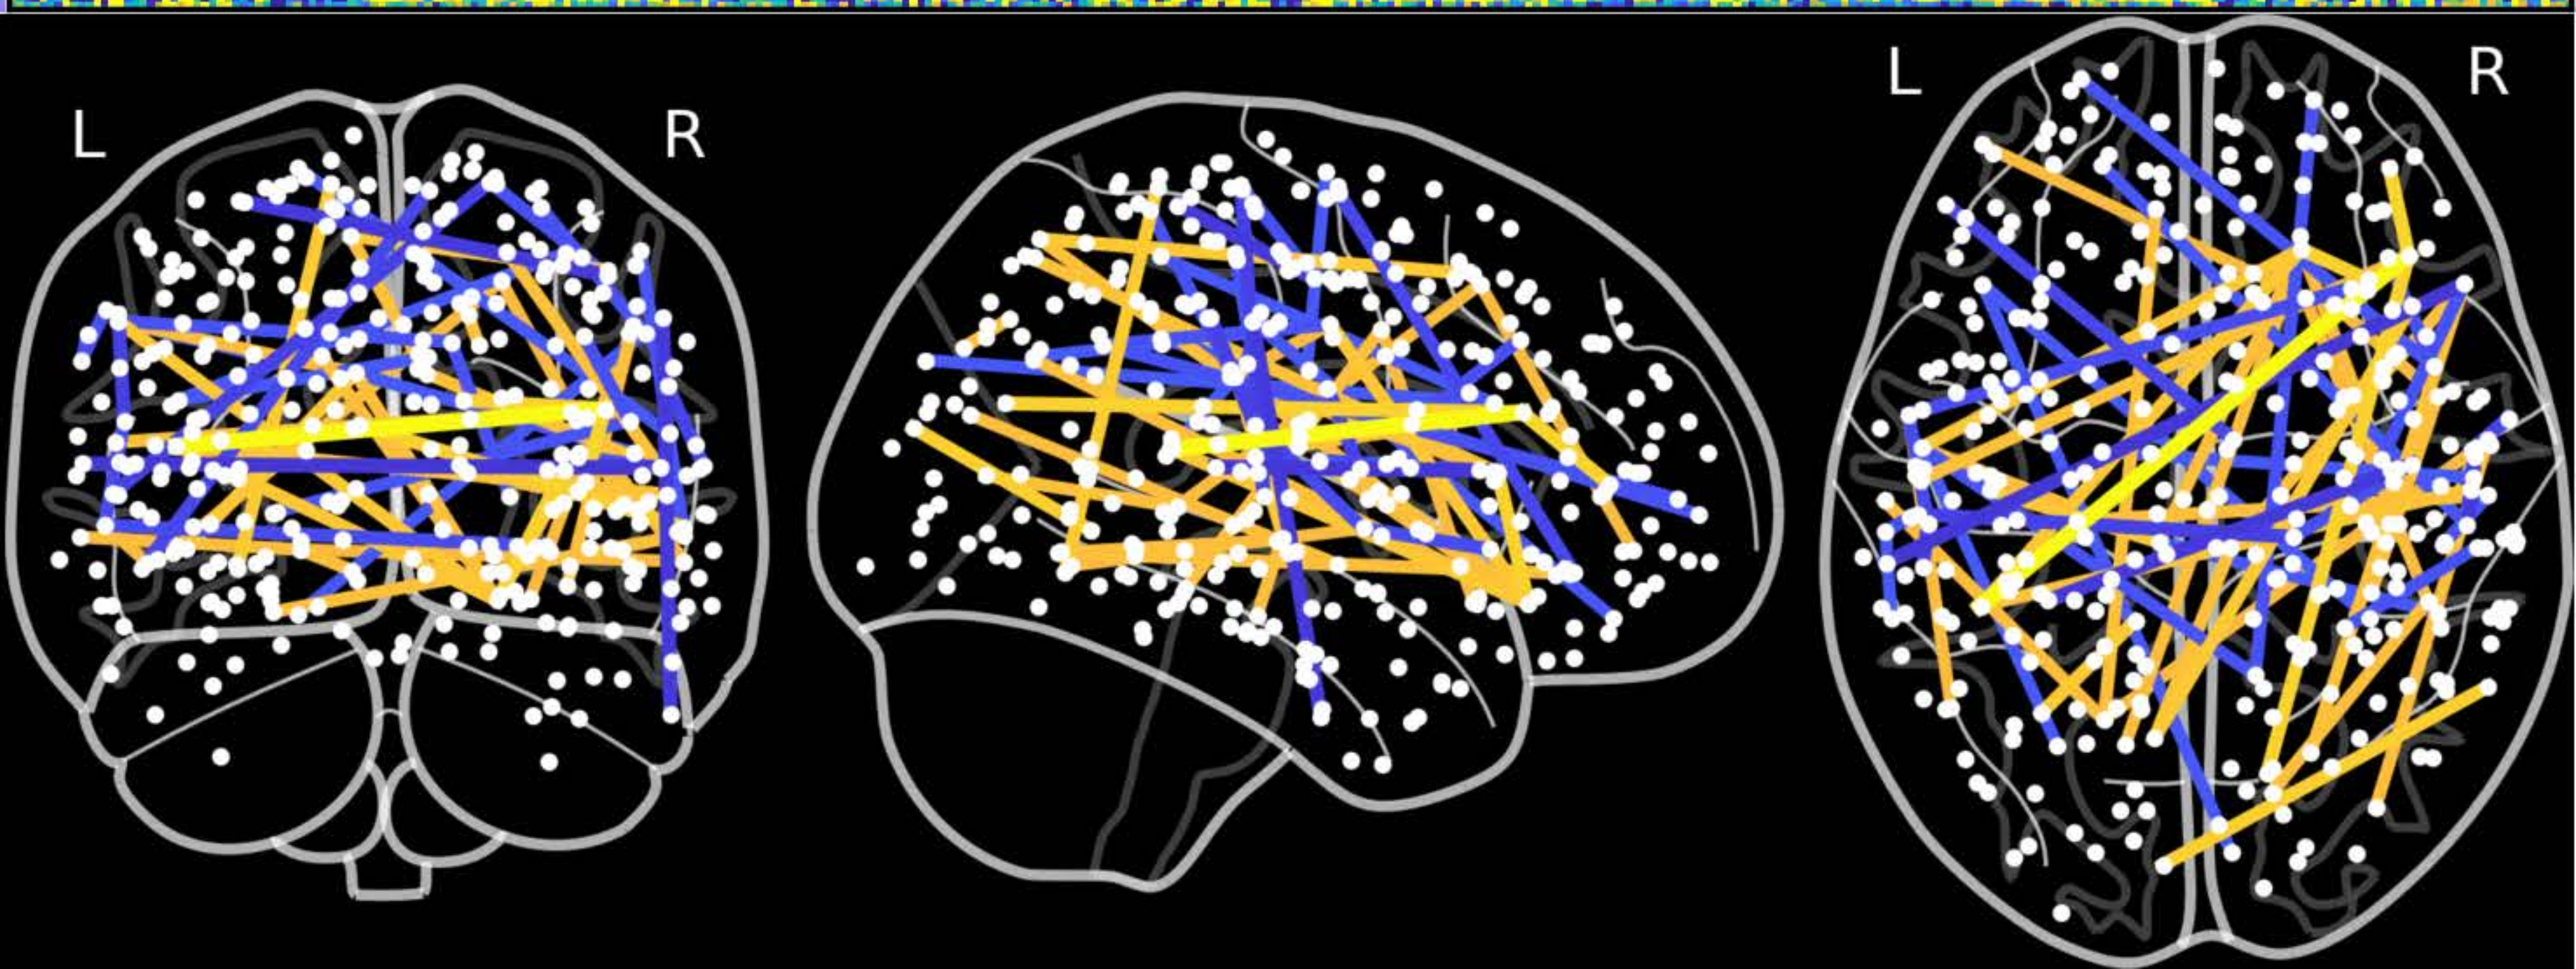



component\_73

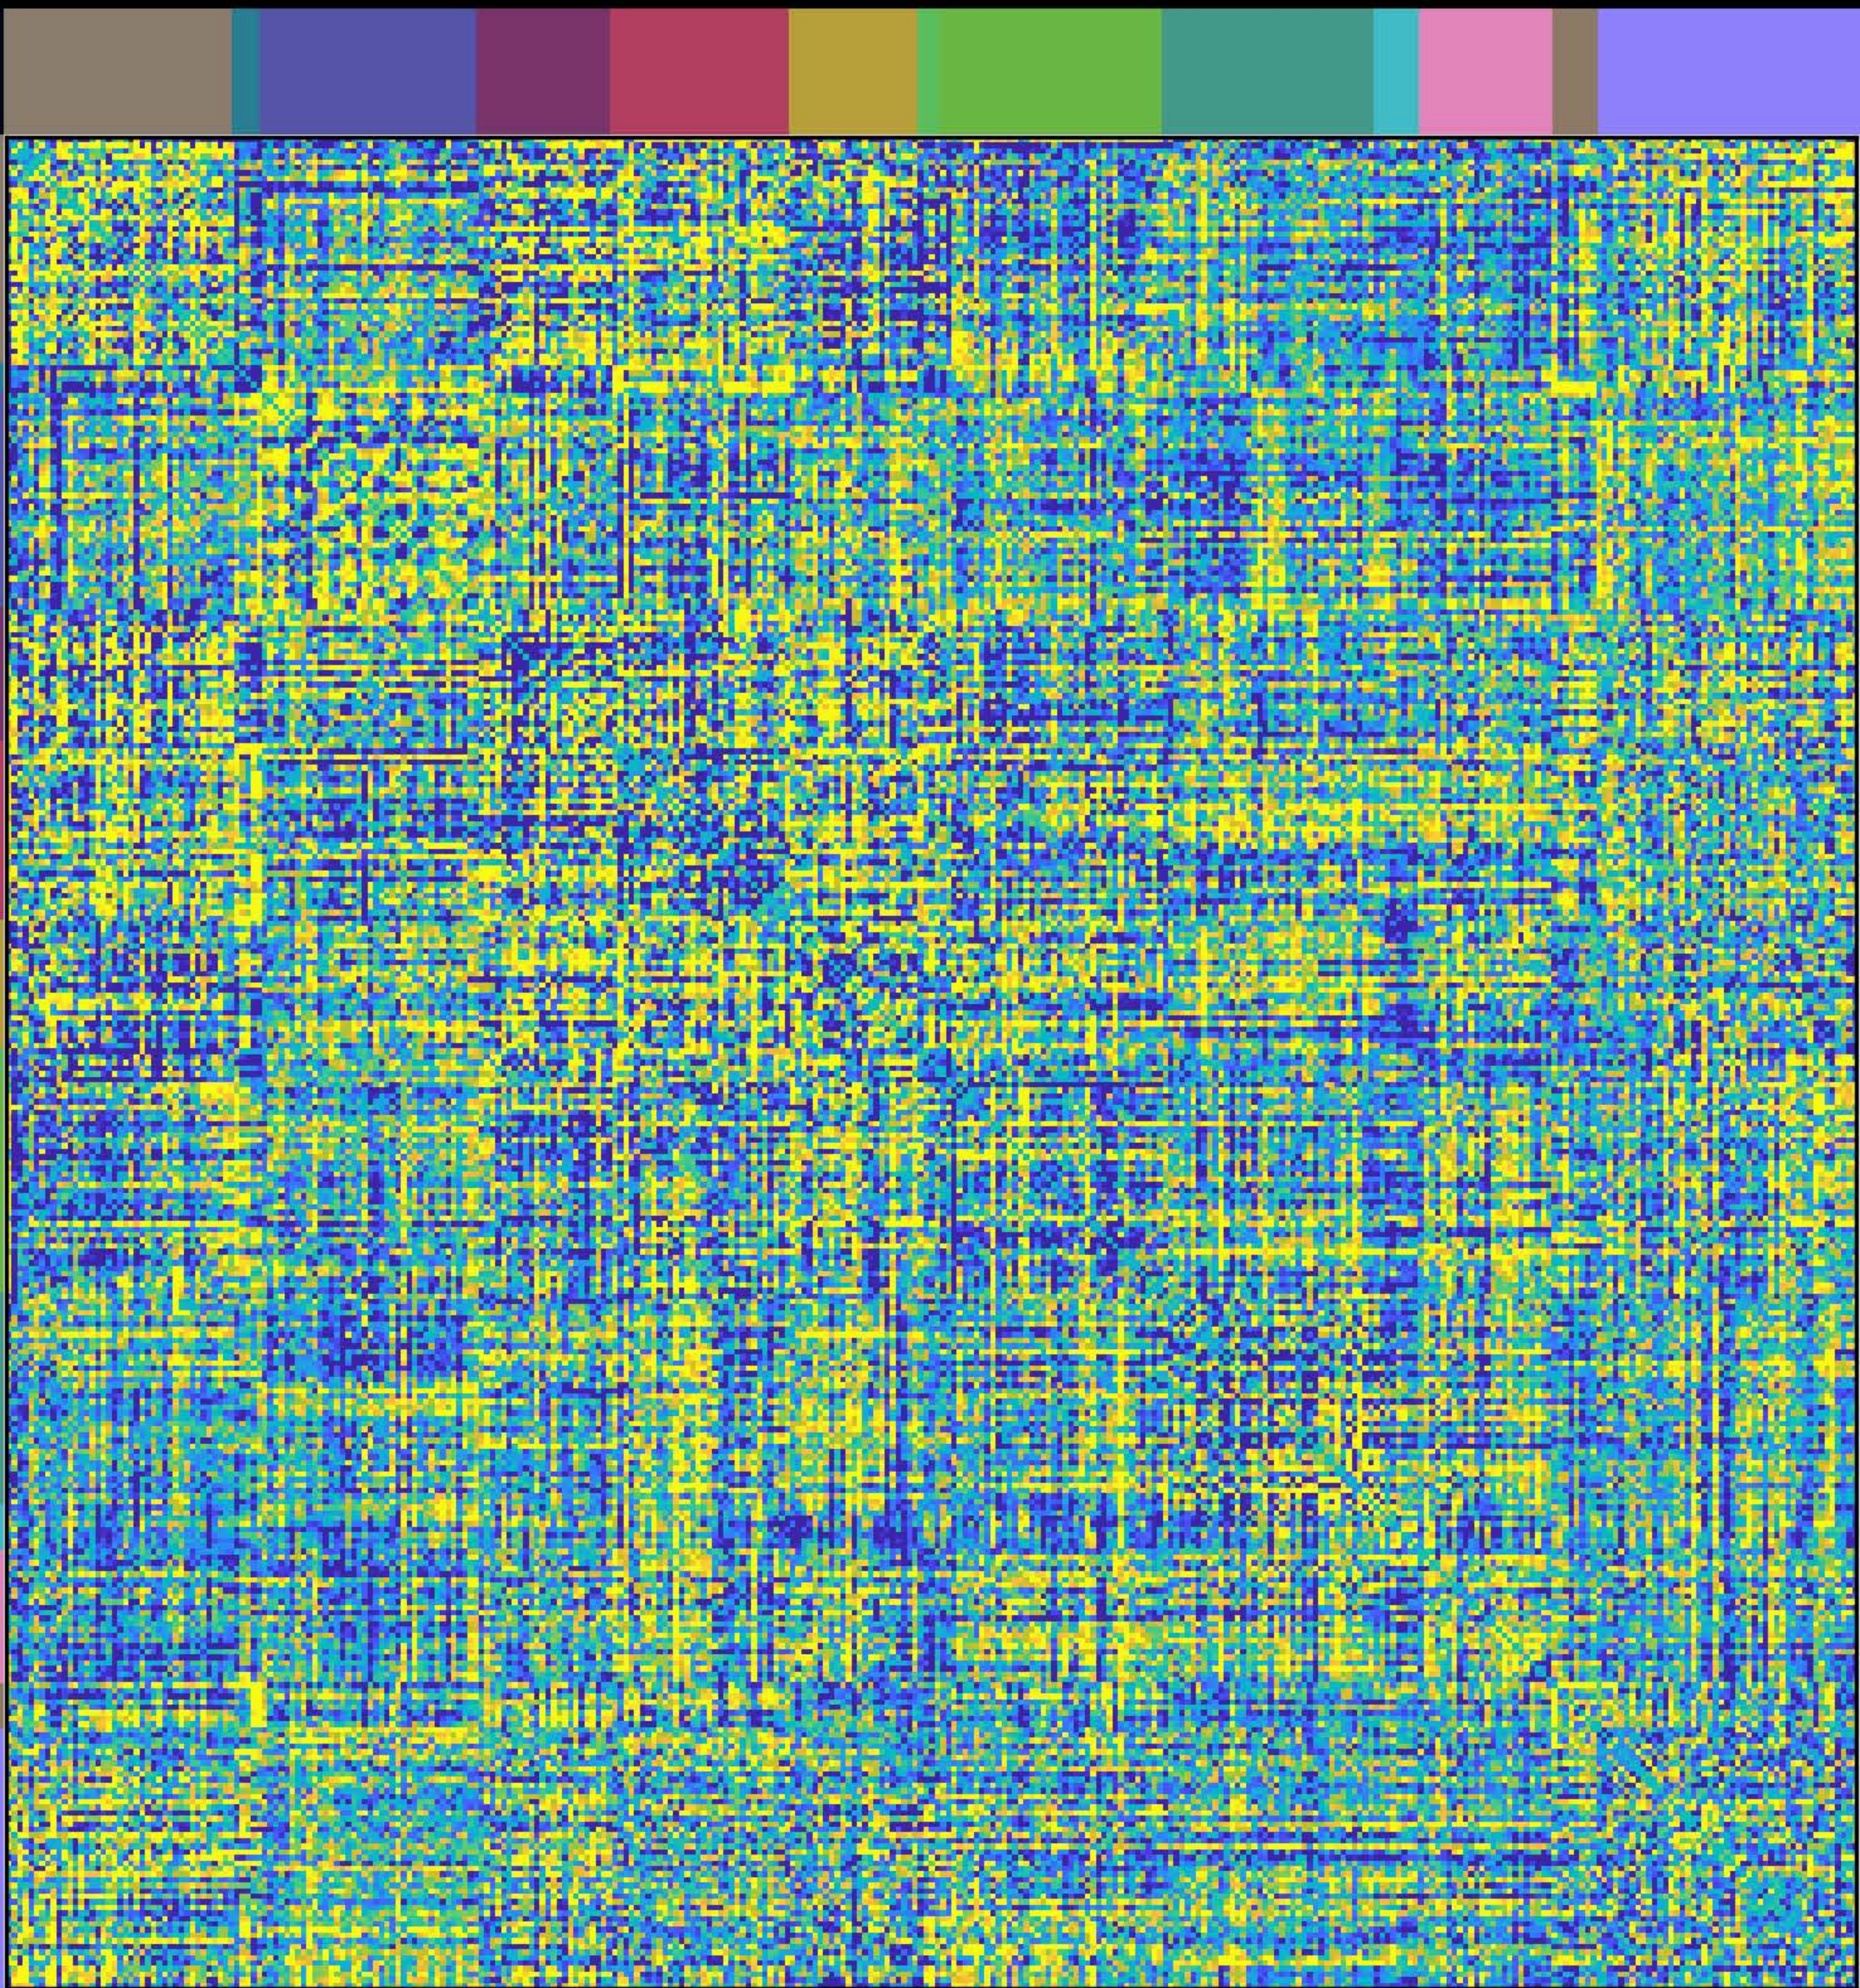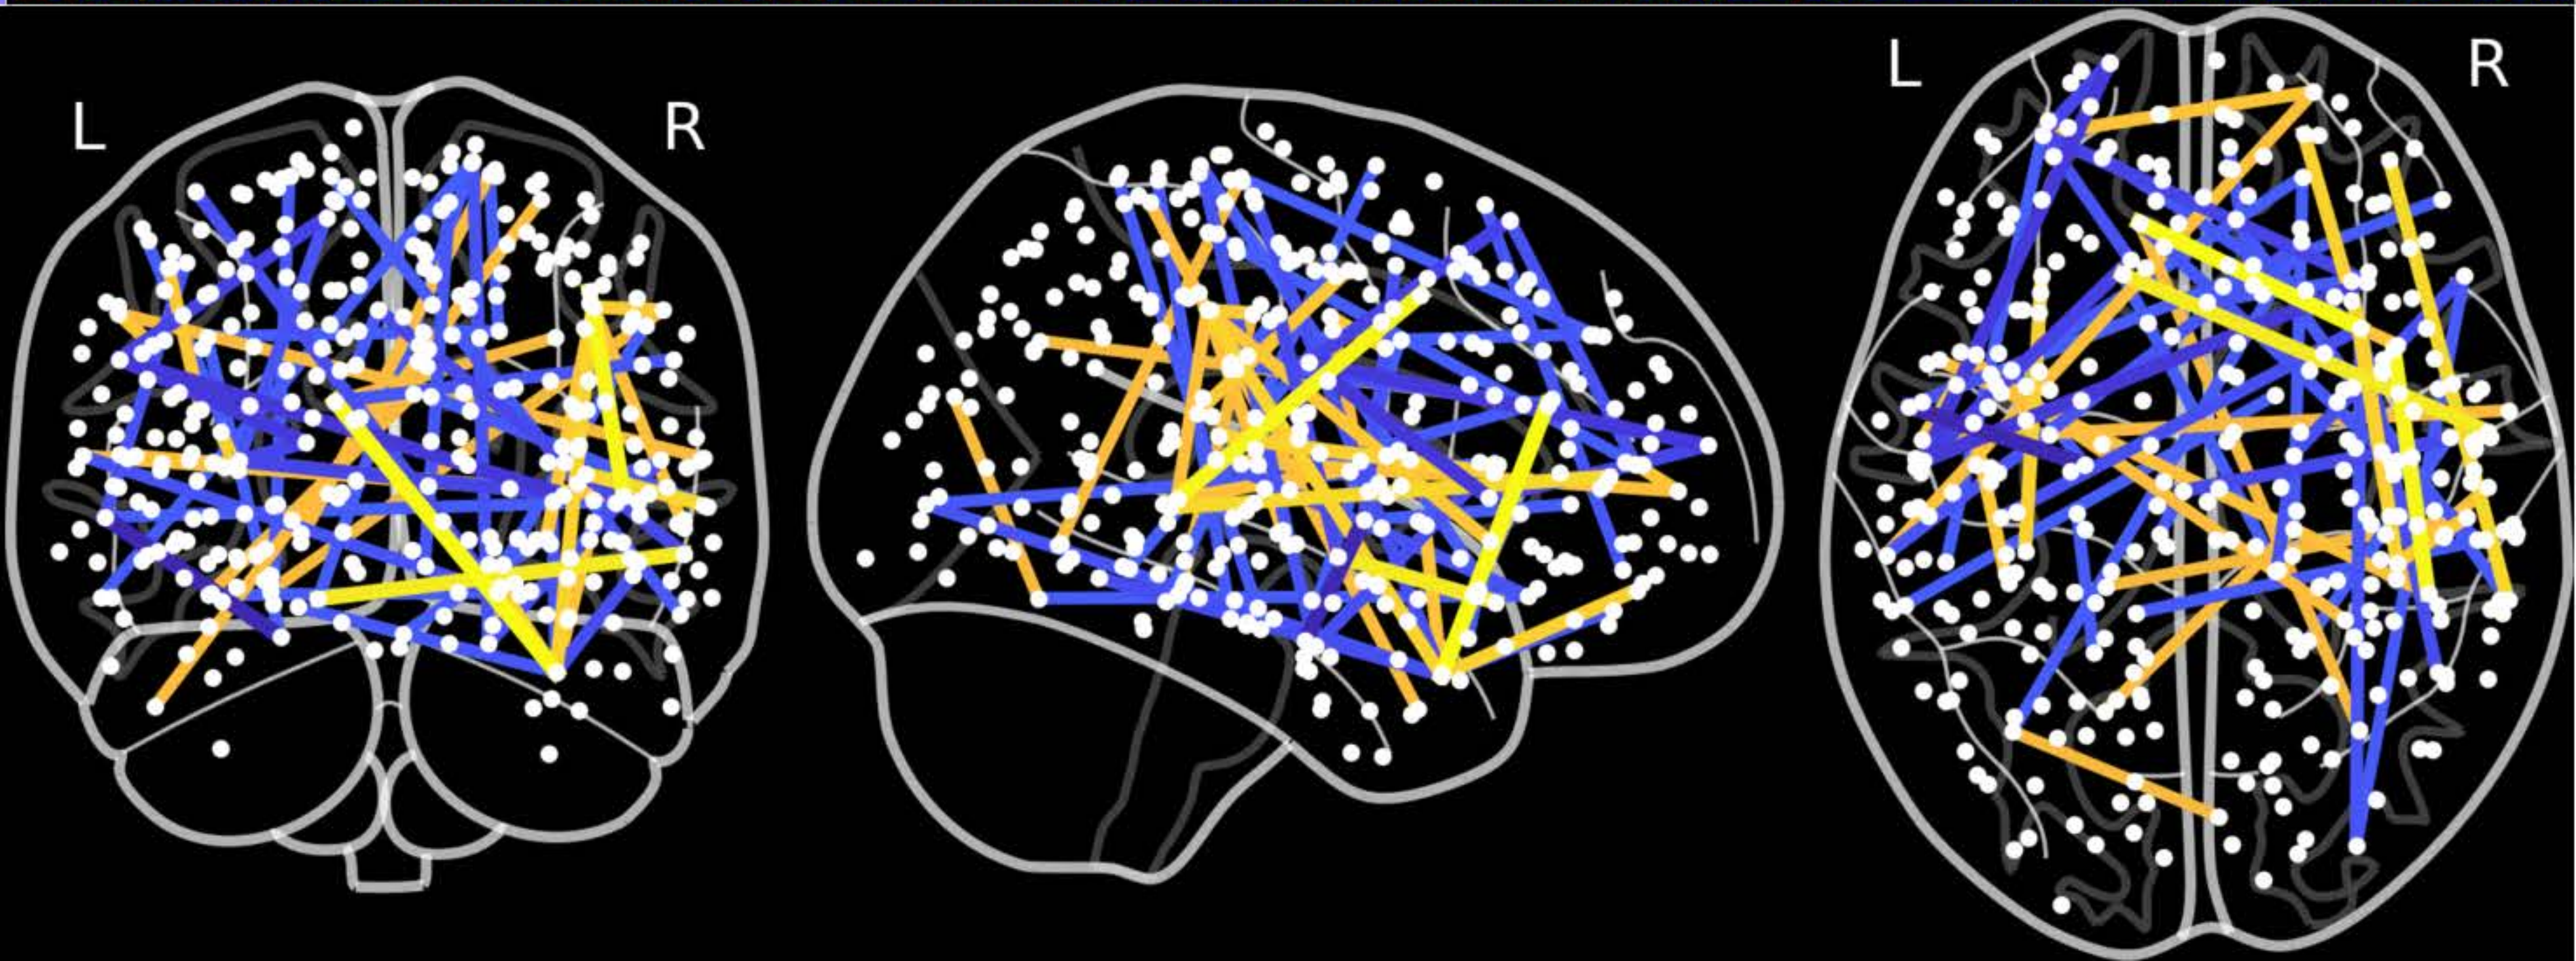



component\_74

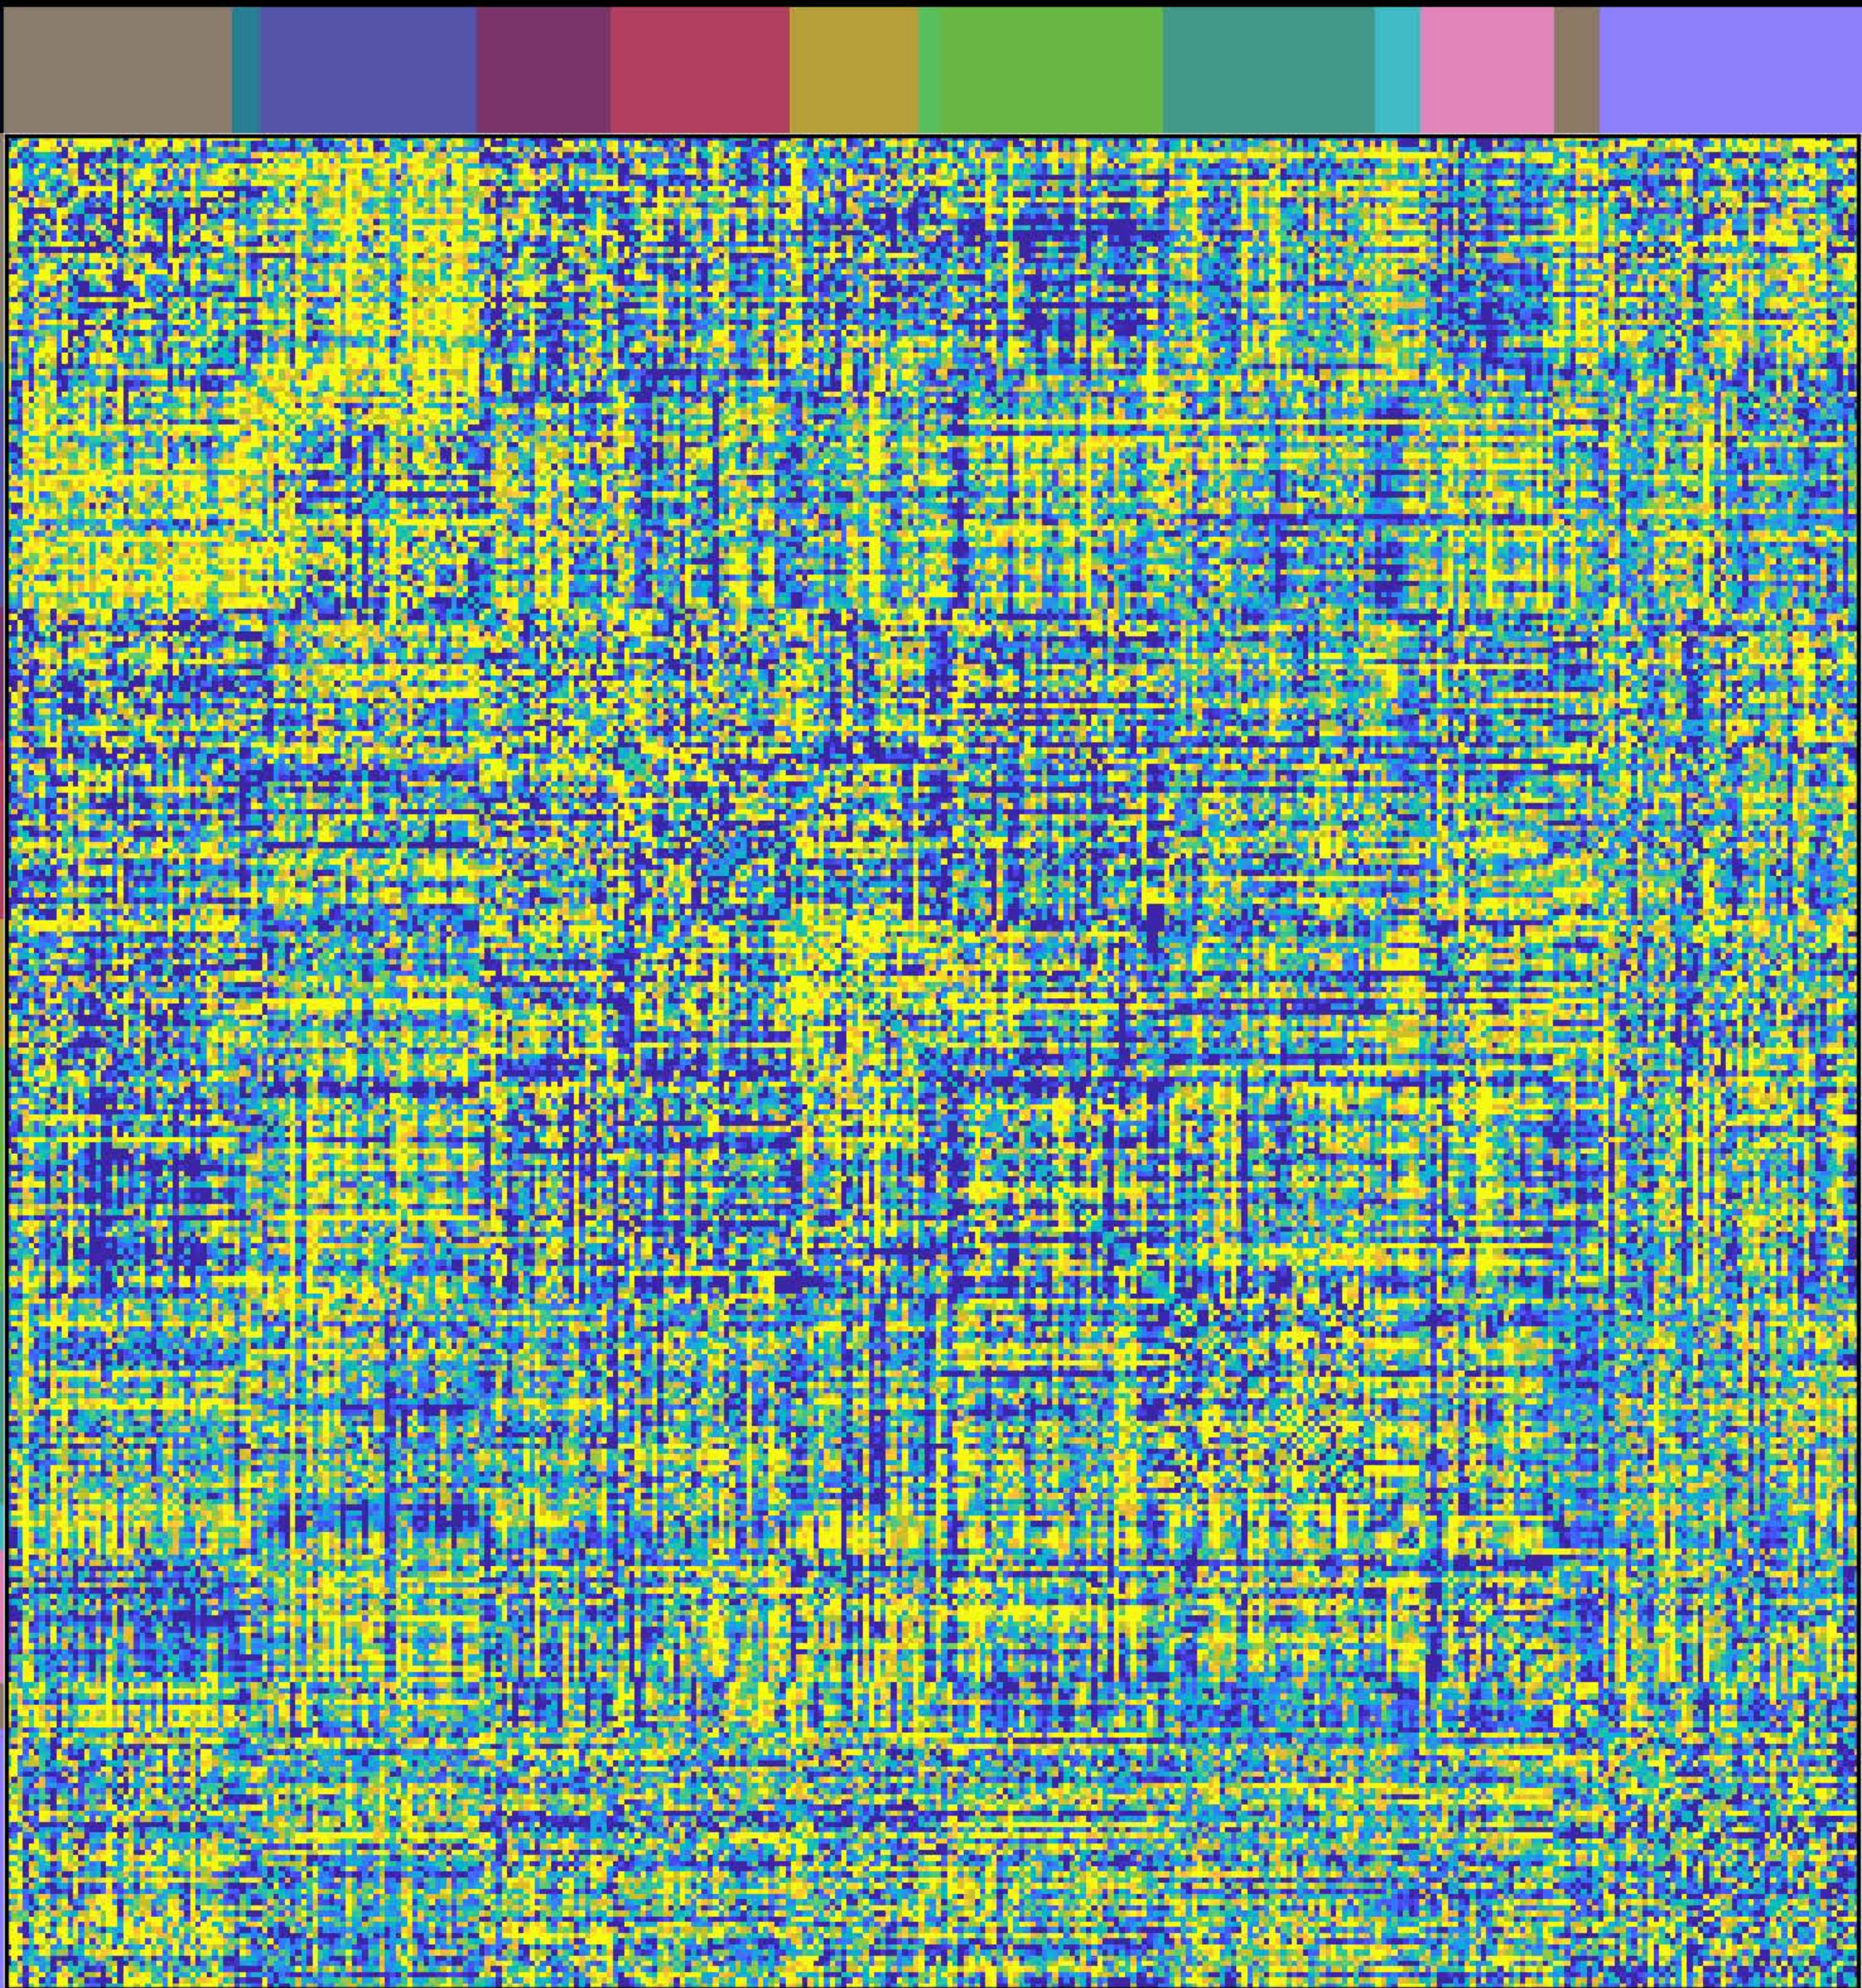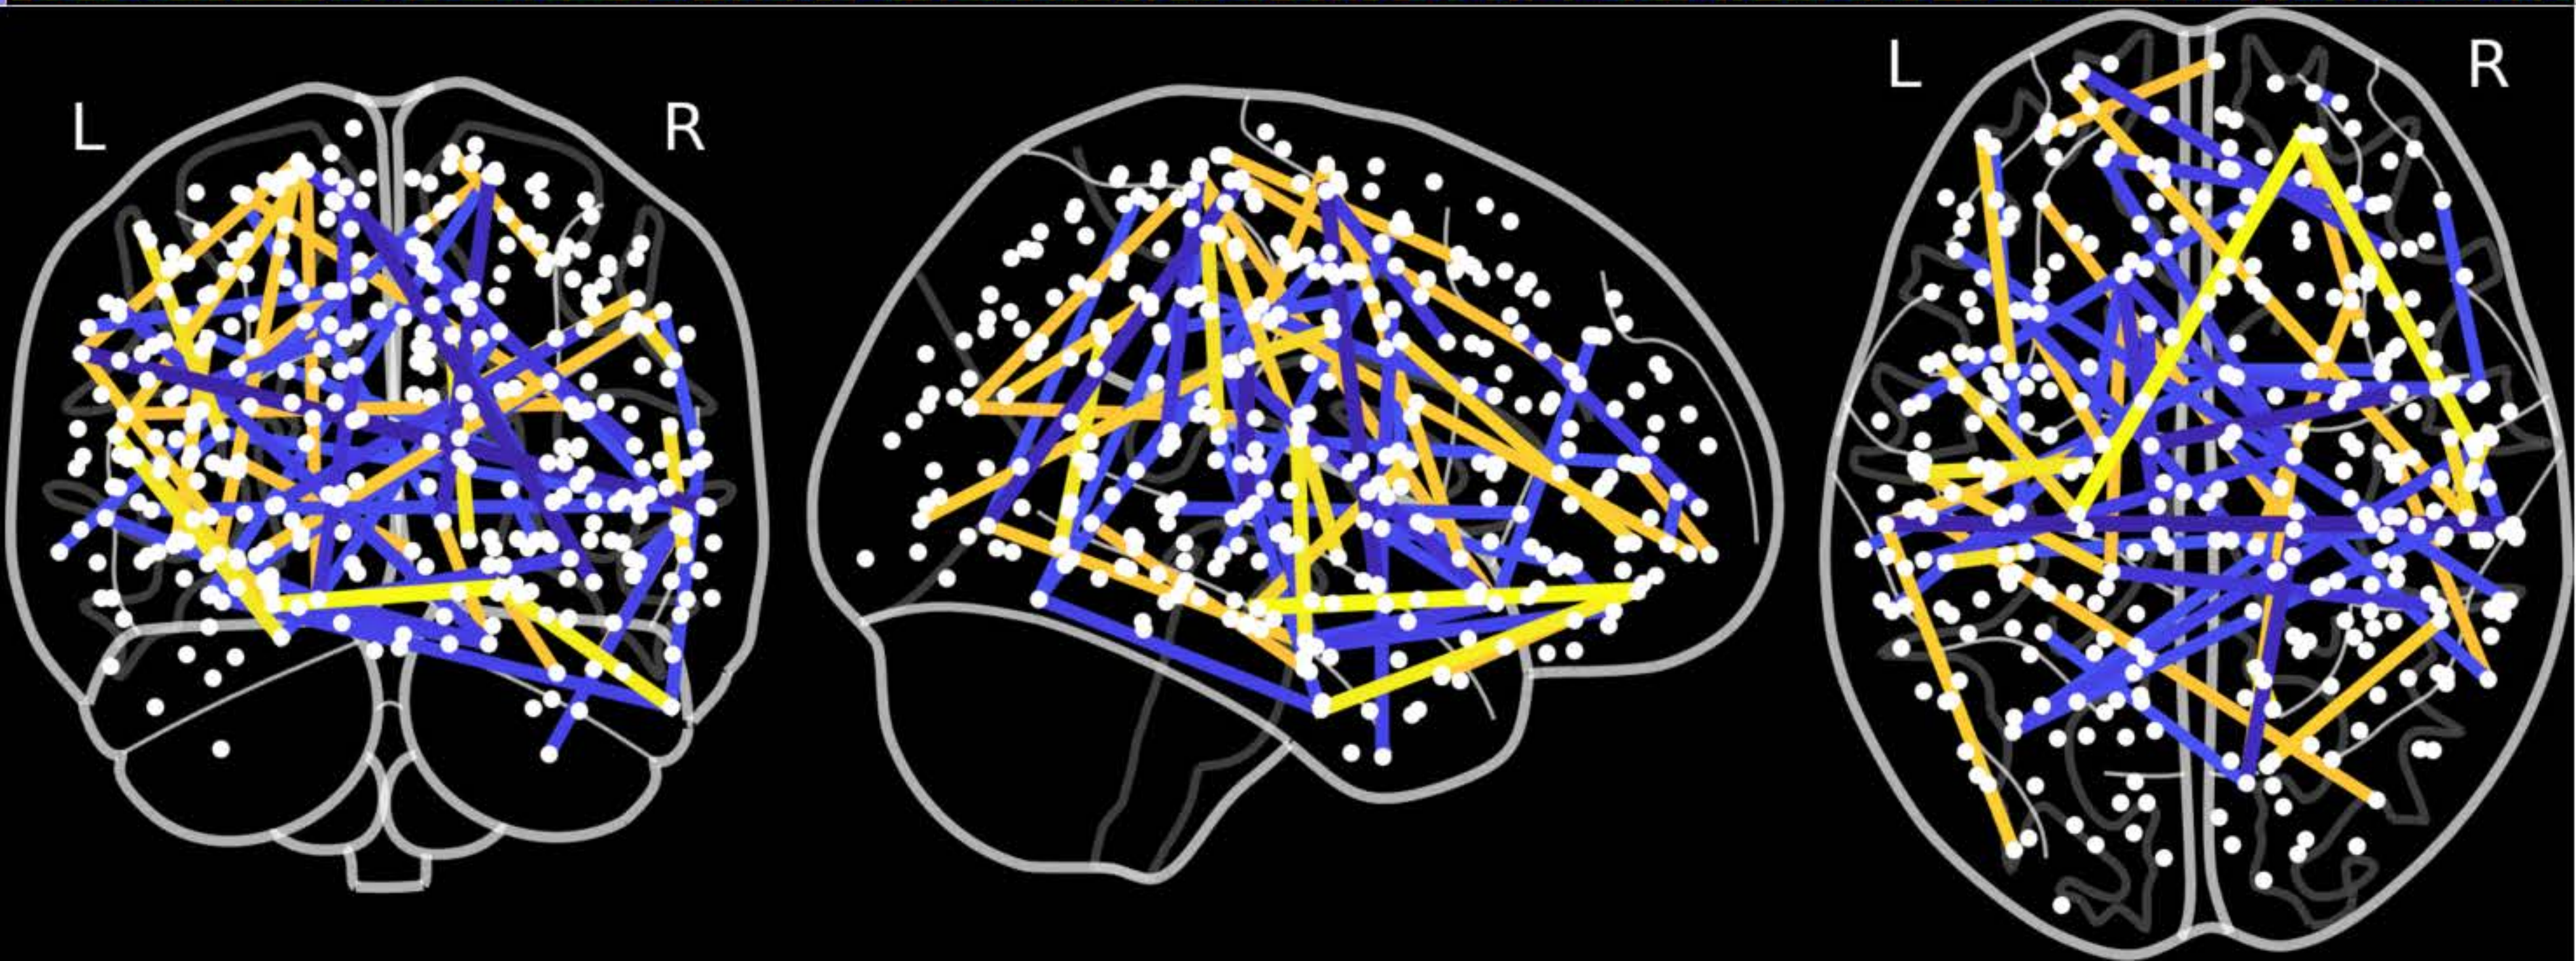



component\_75

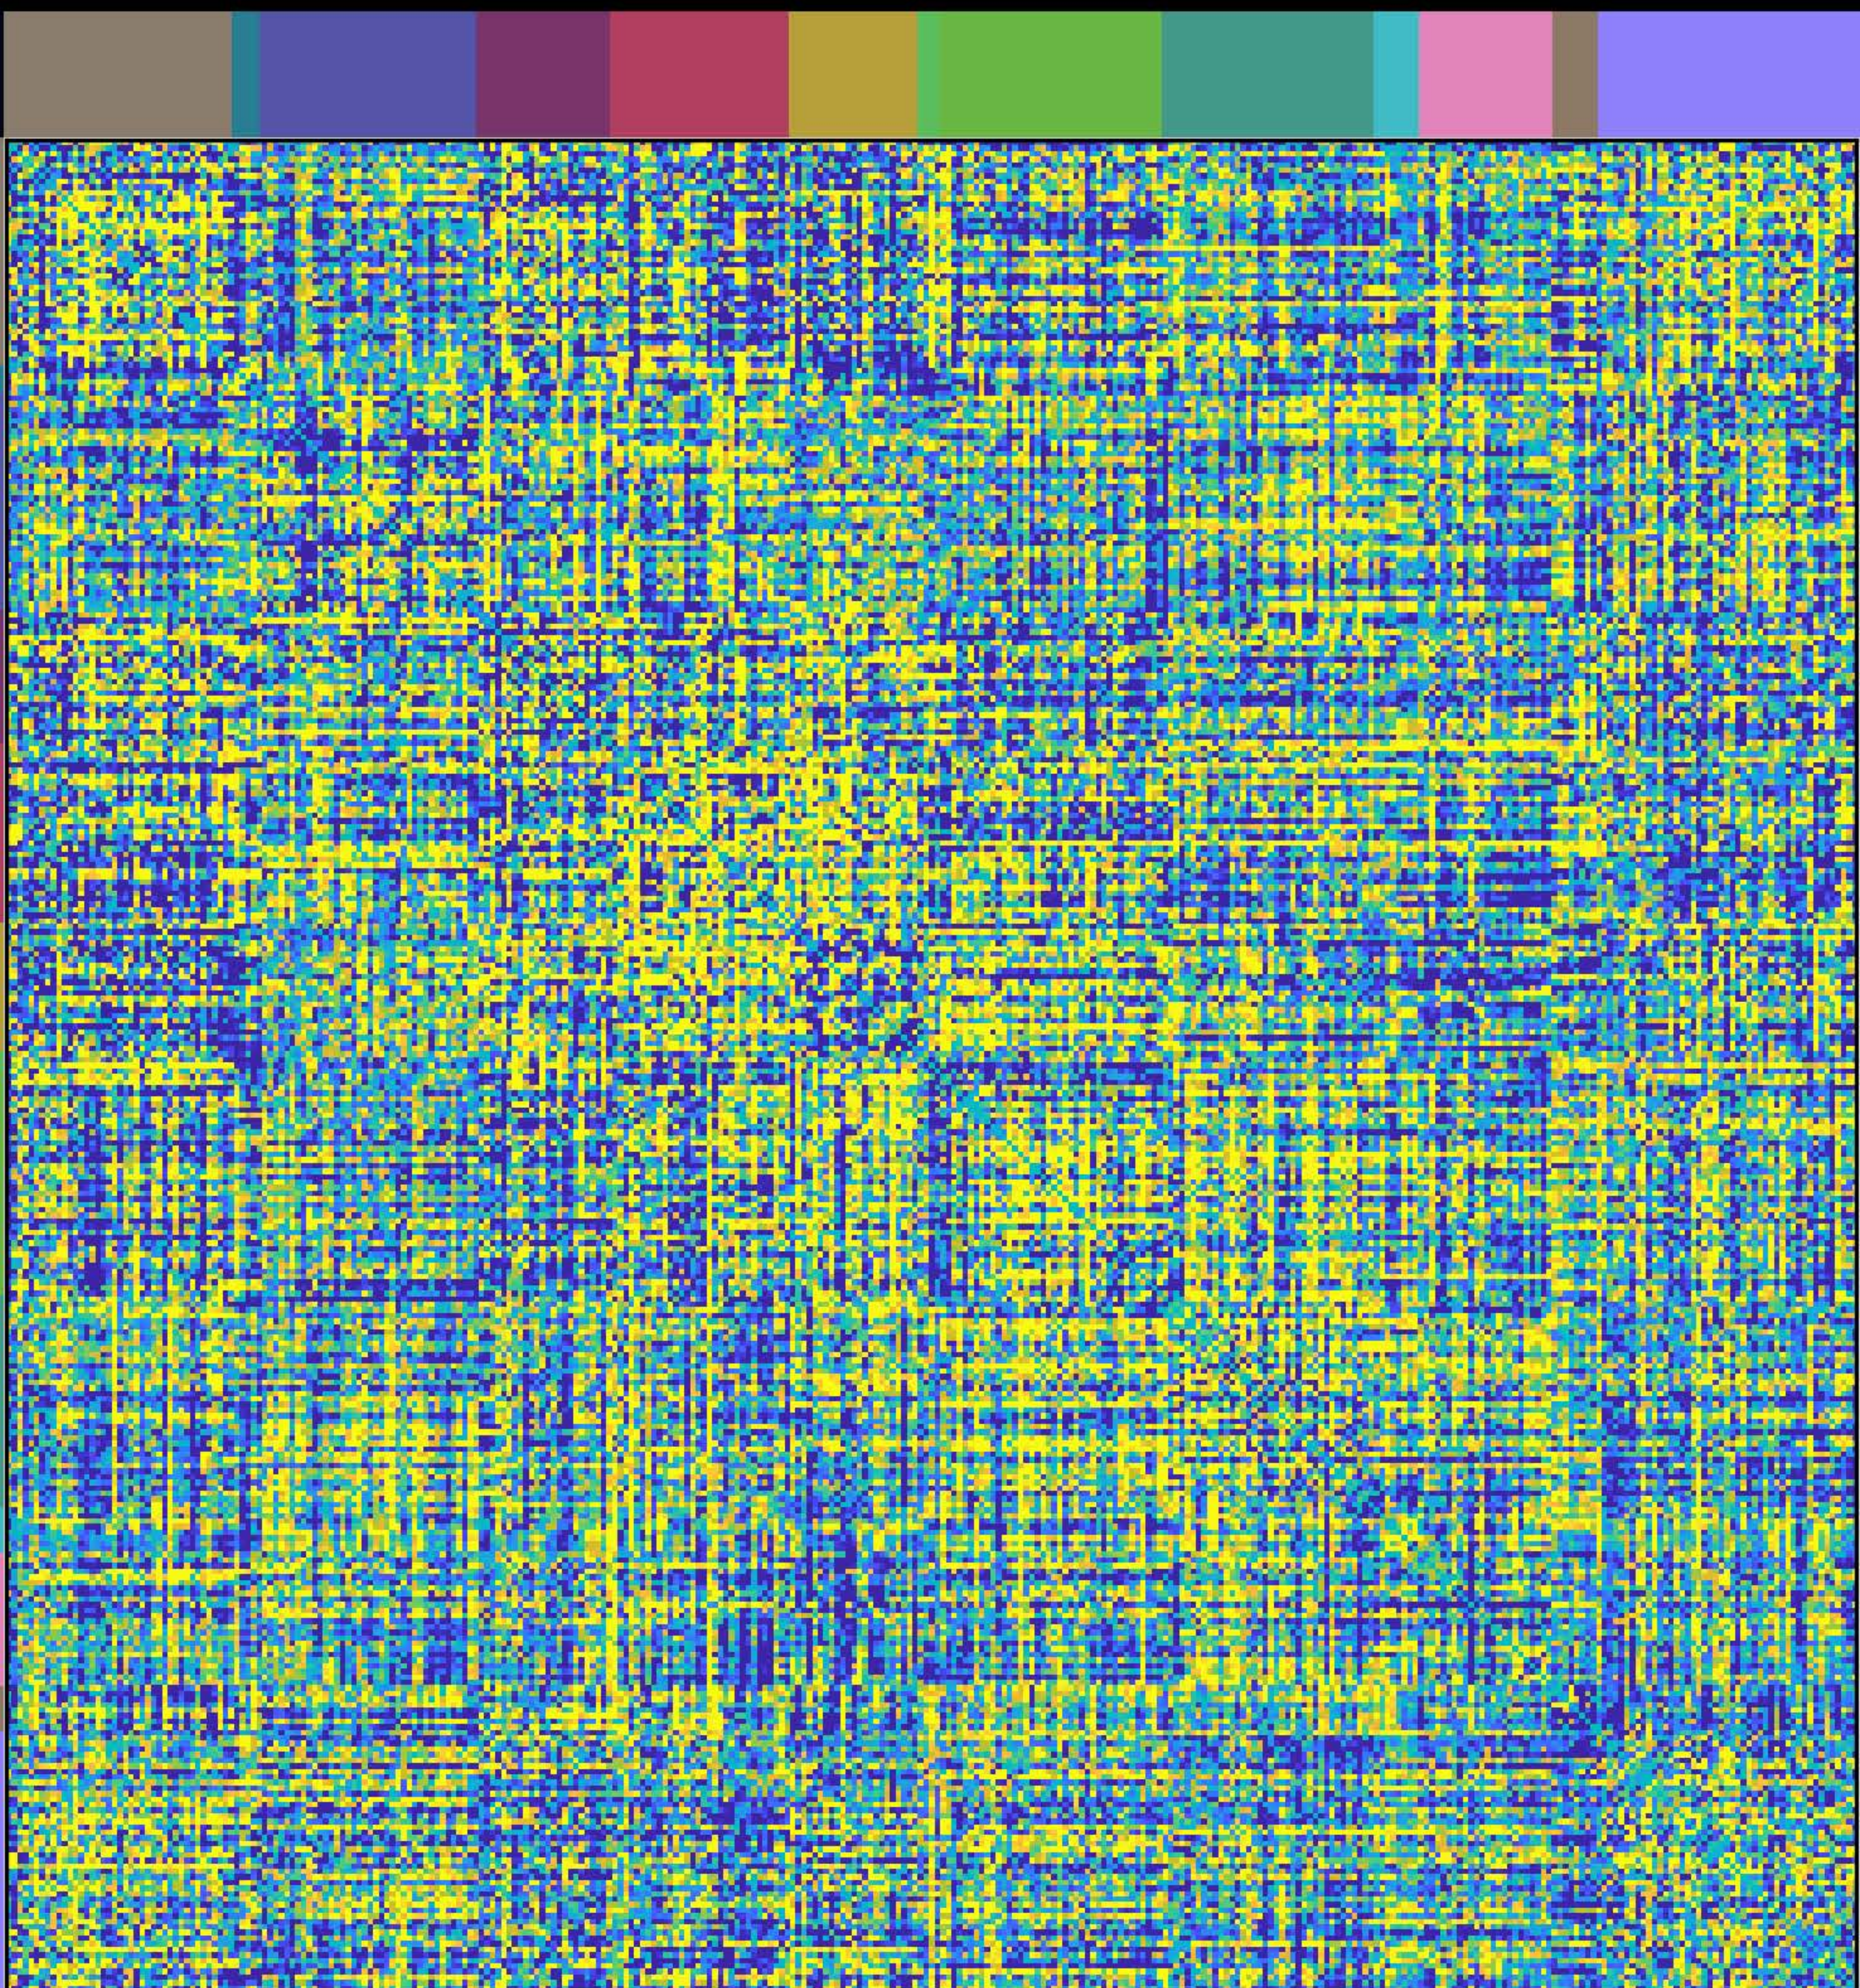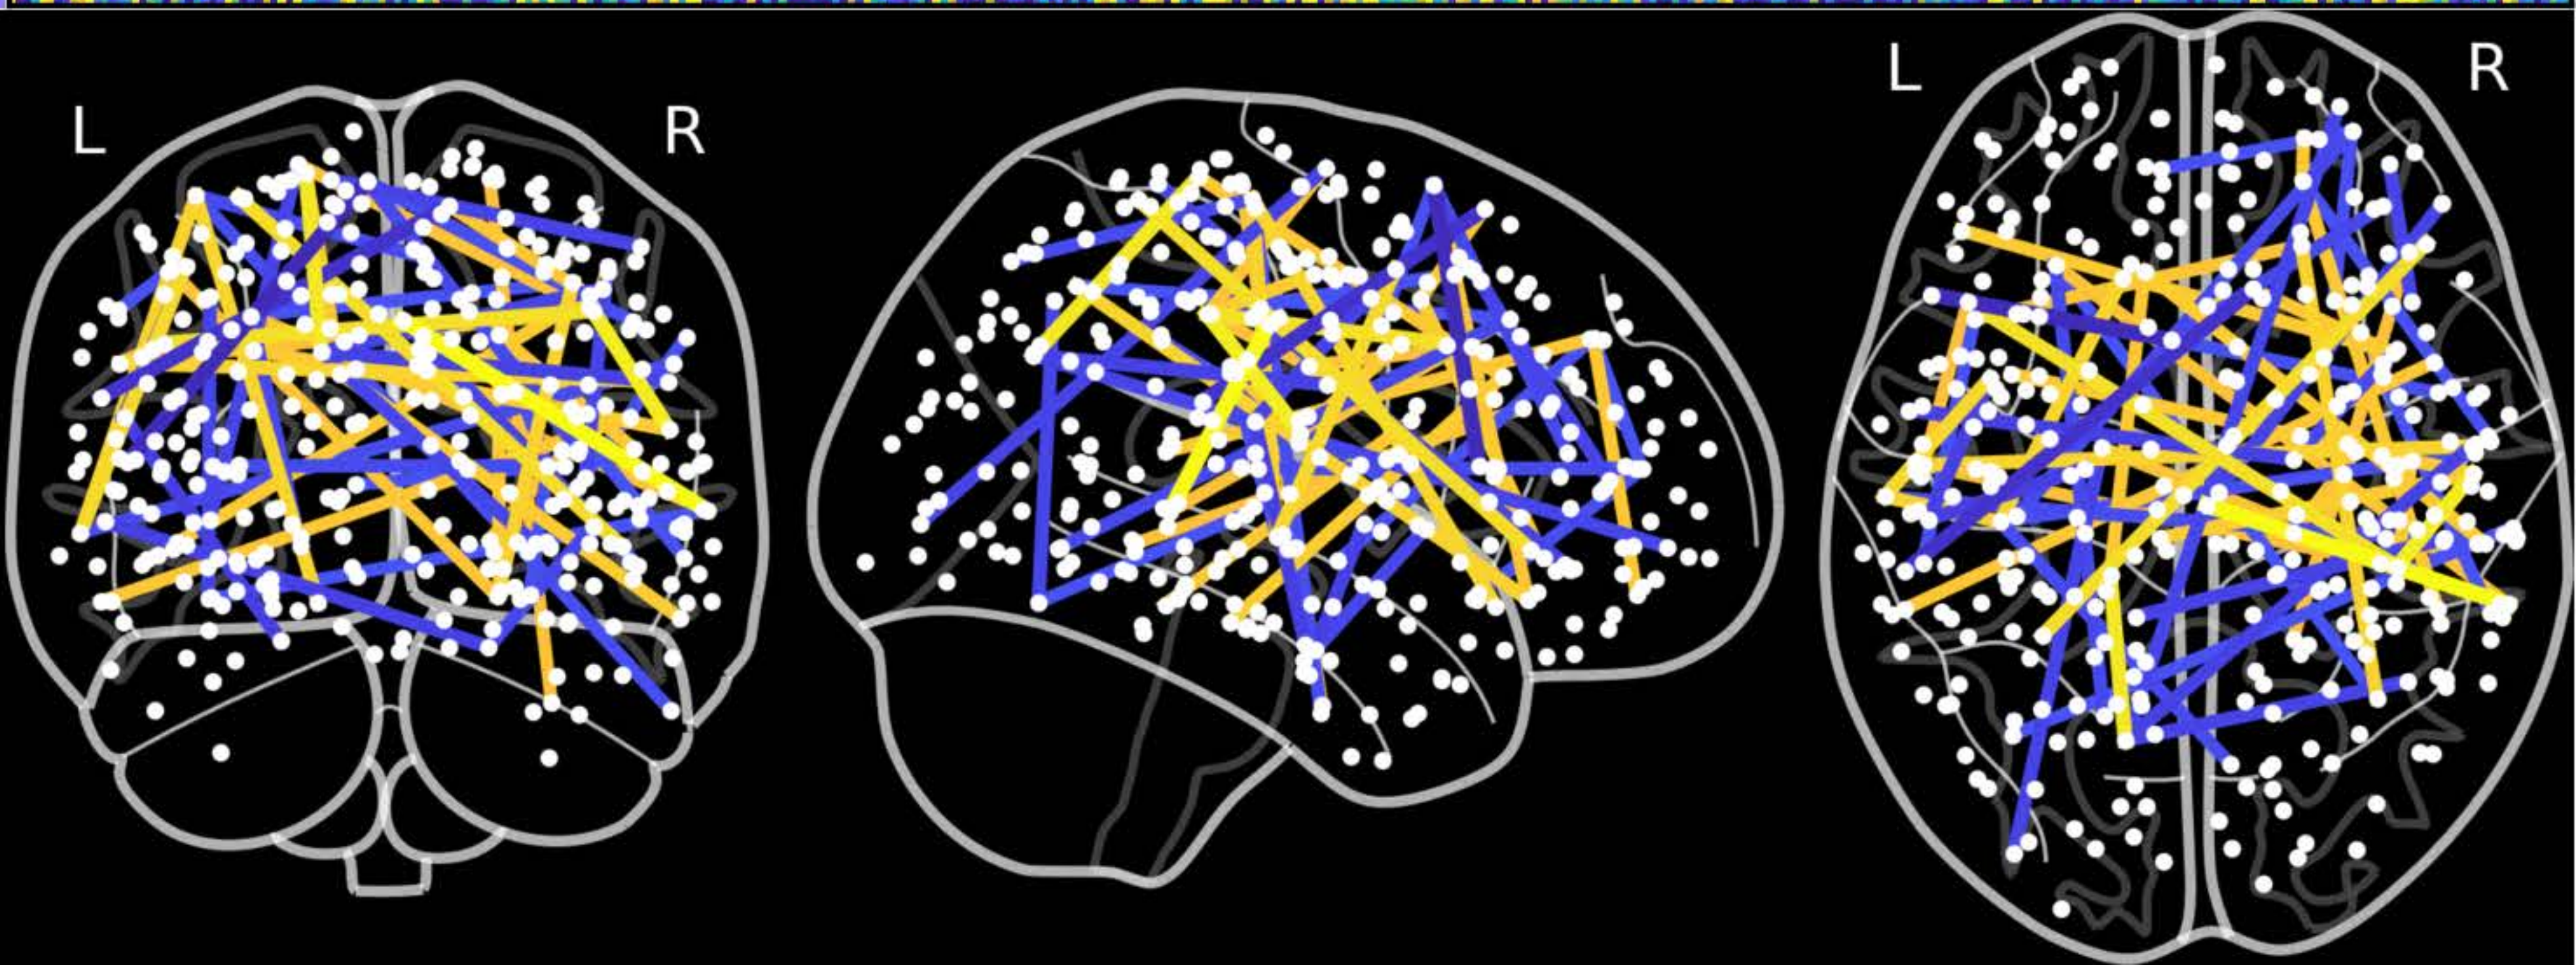



component\_76

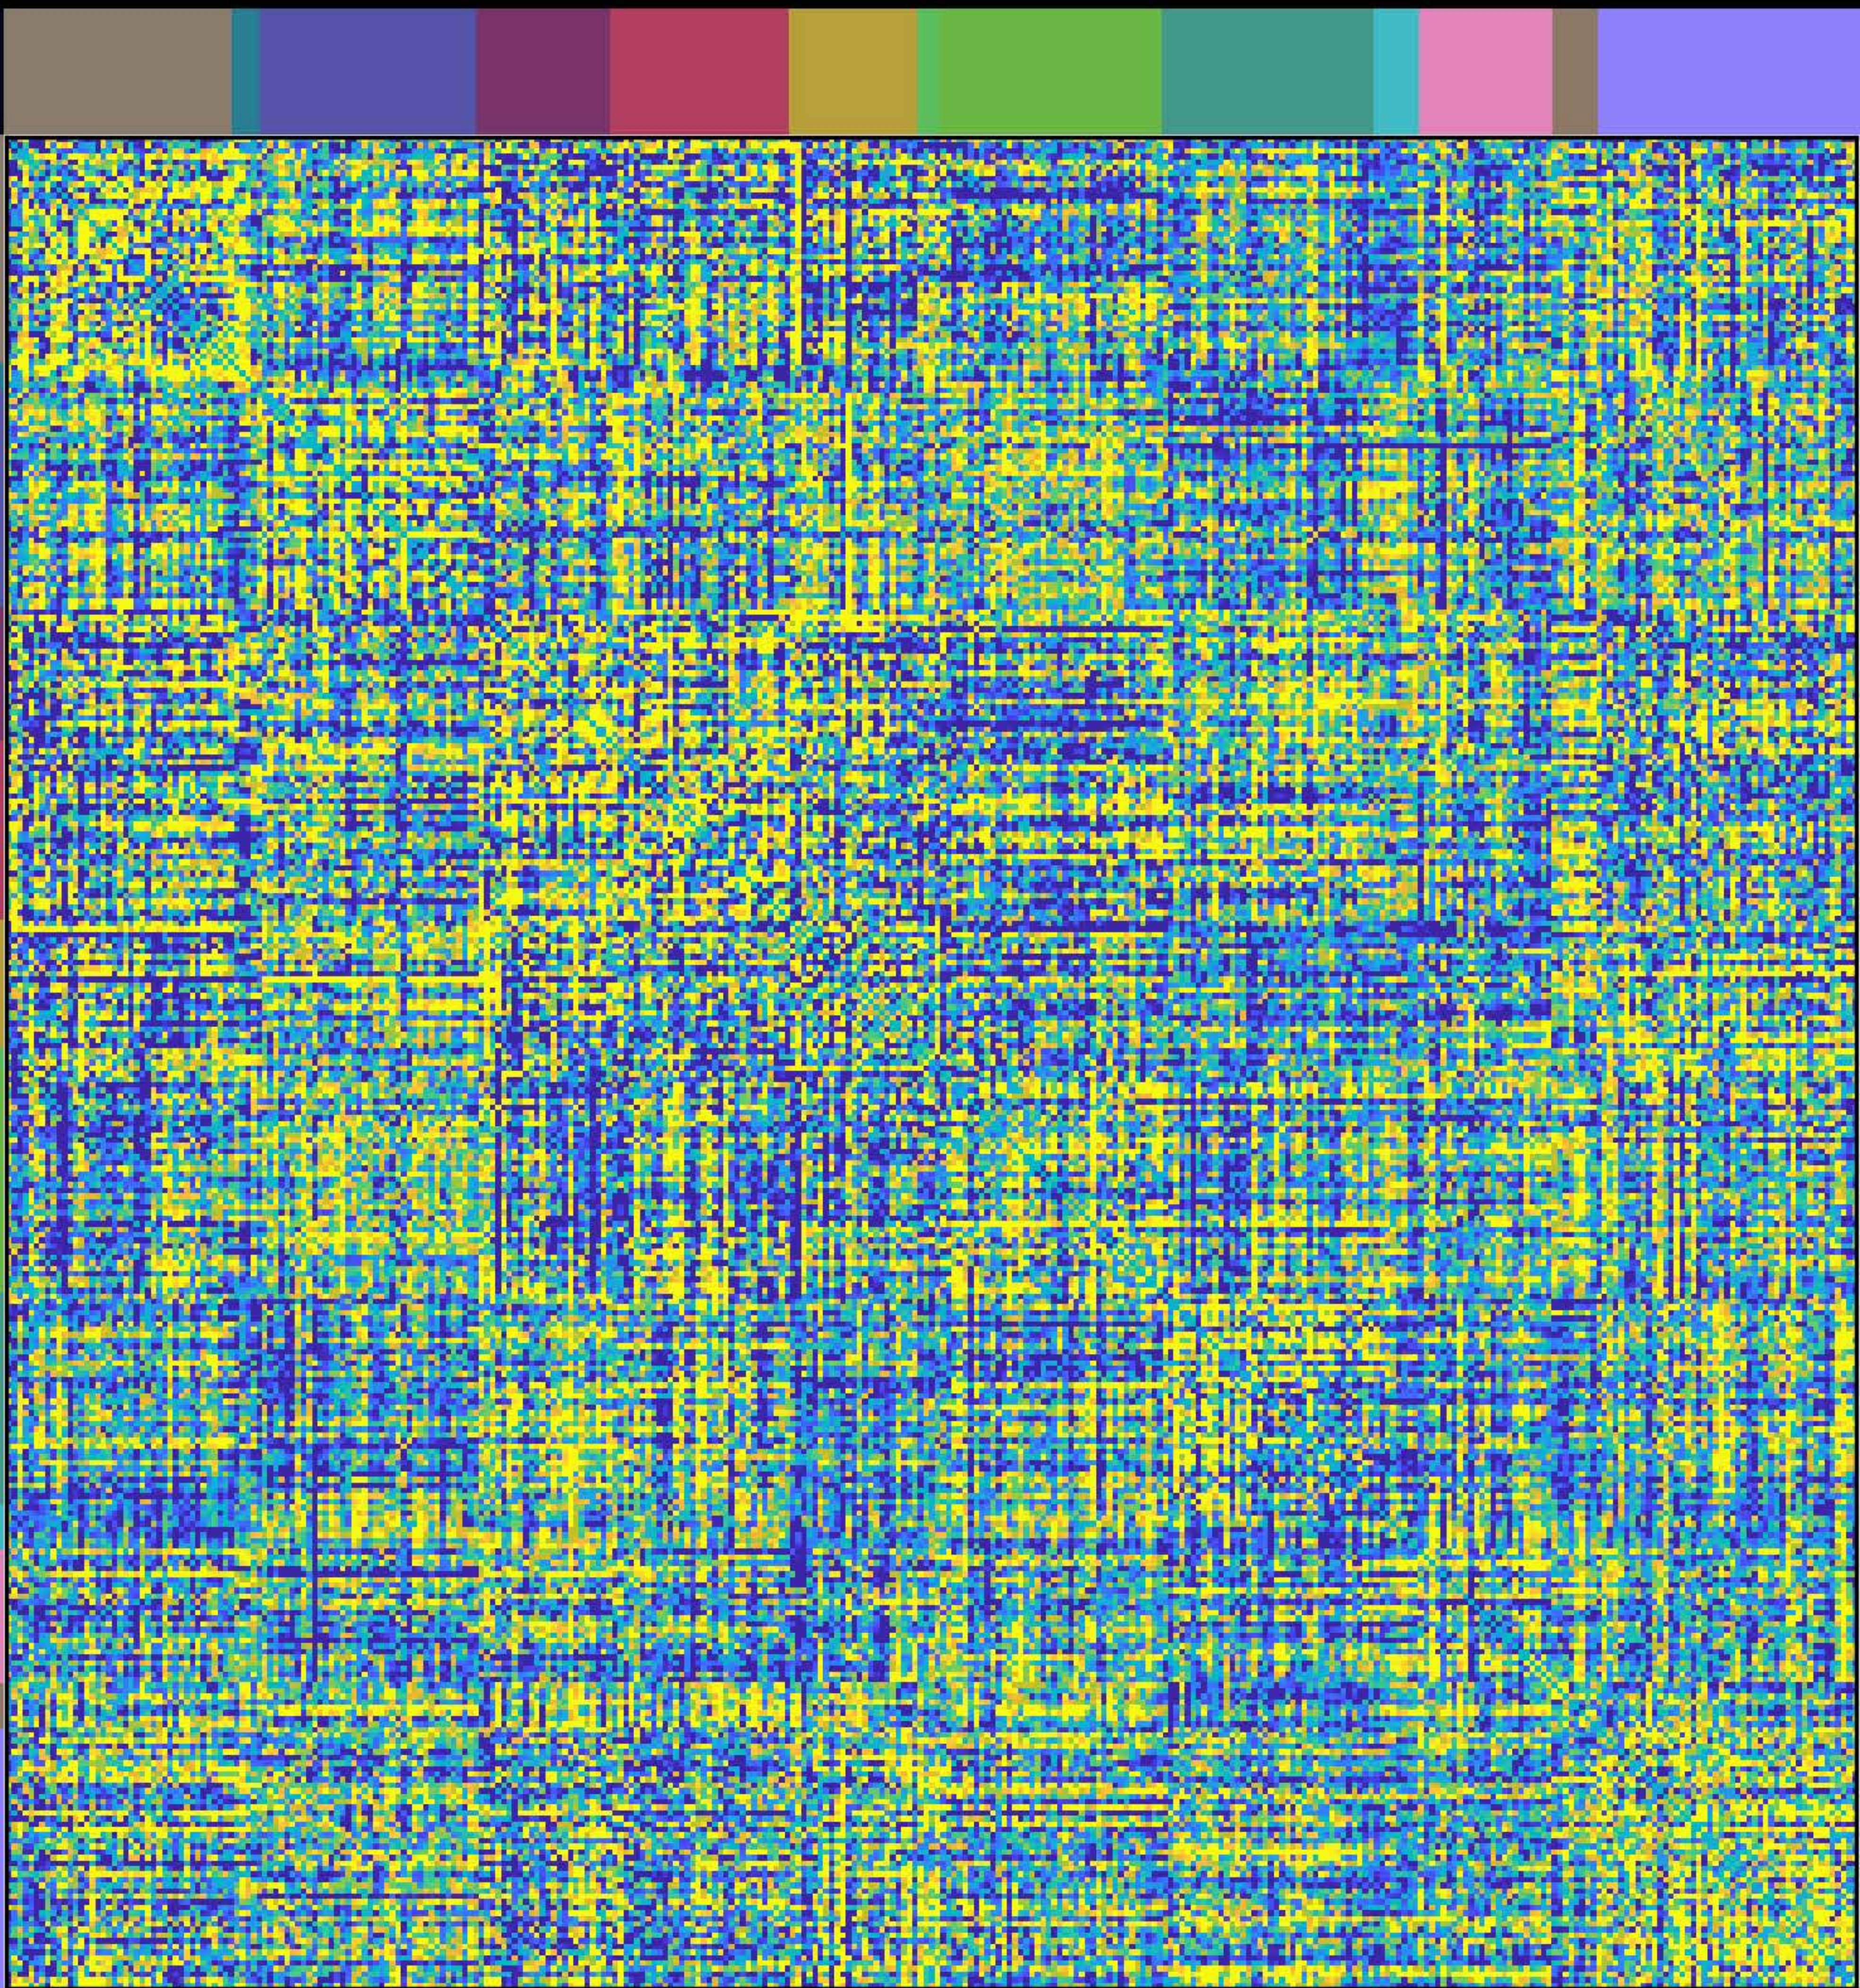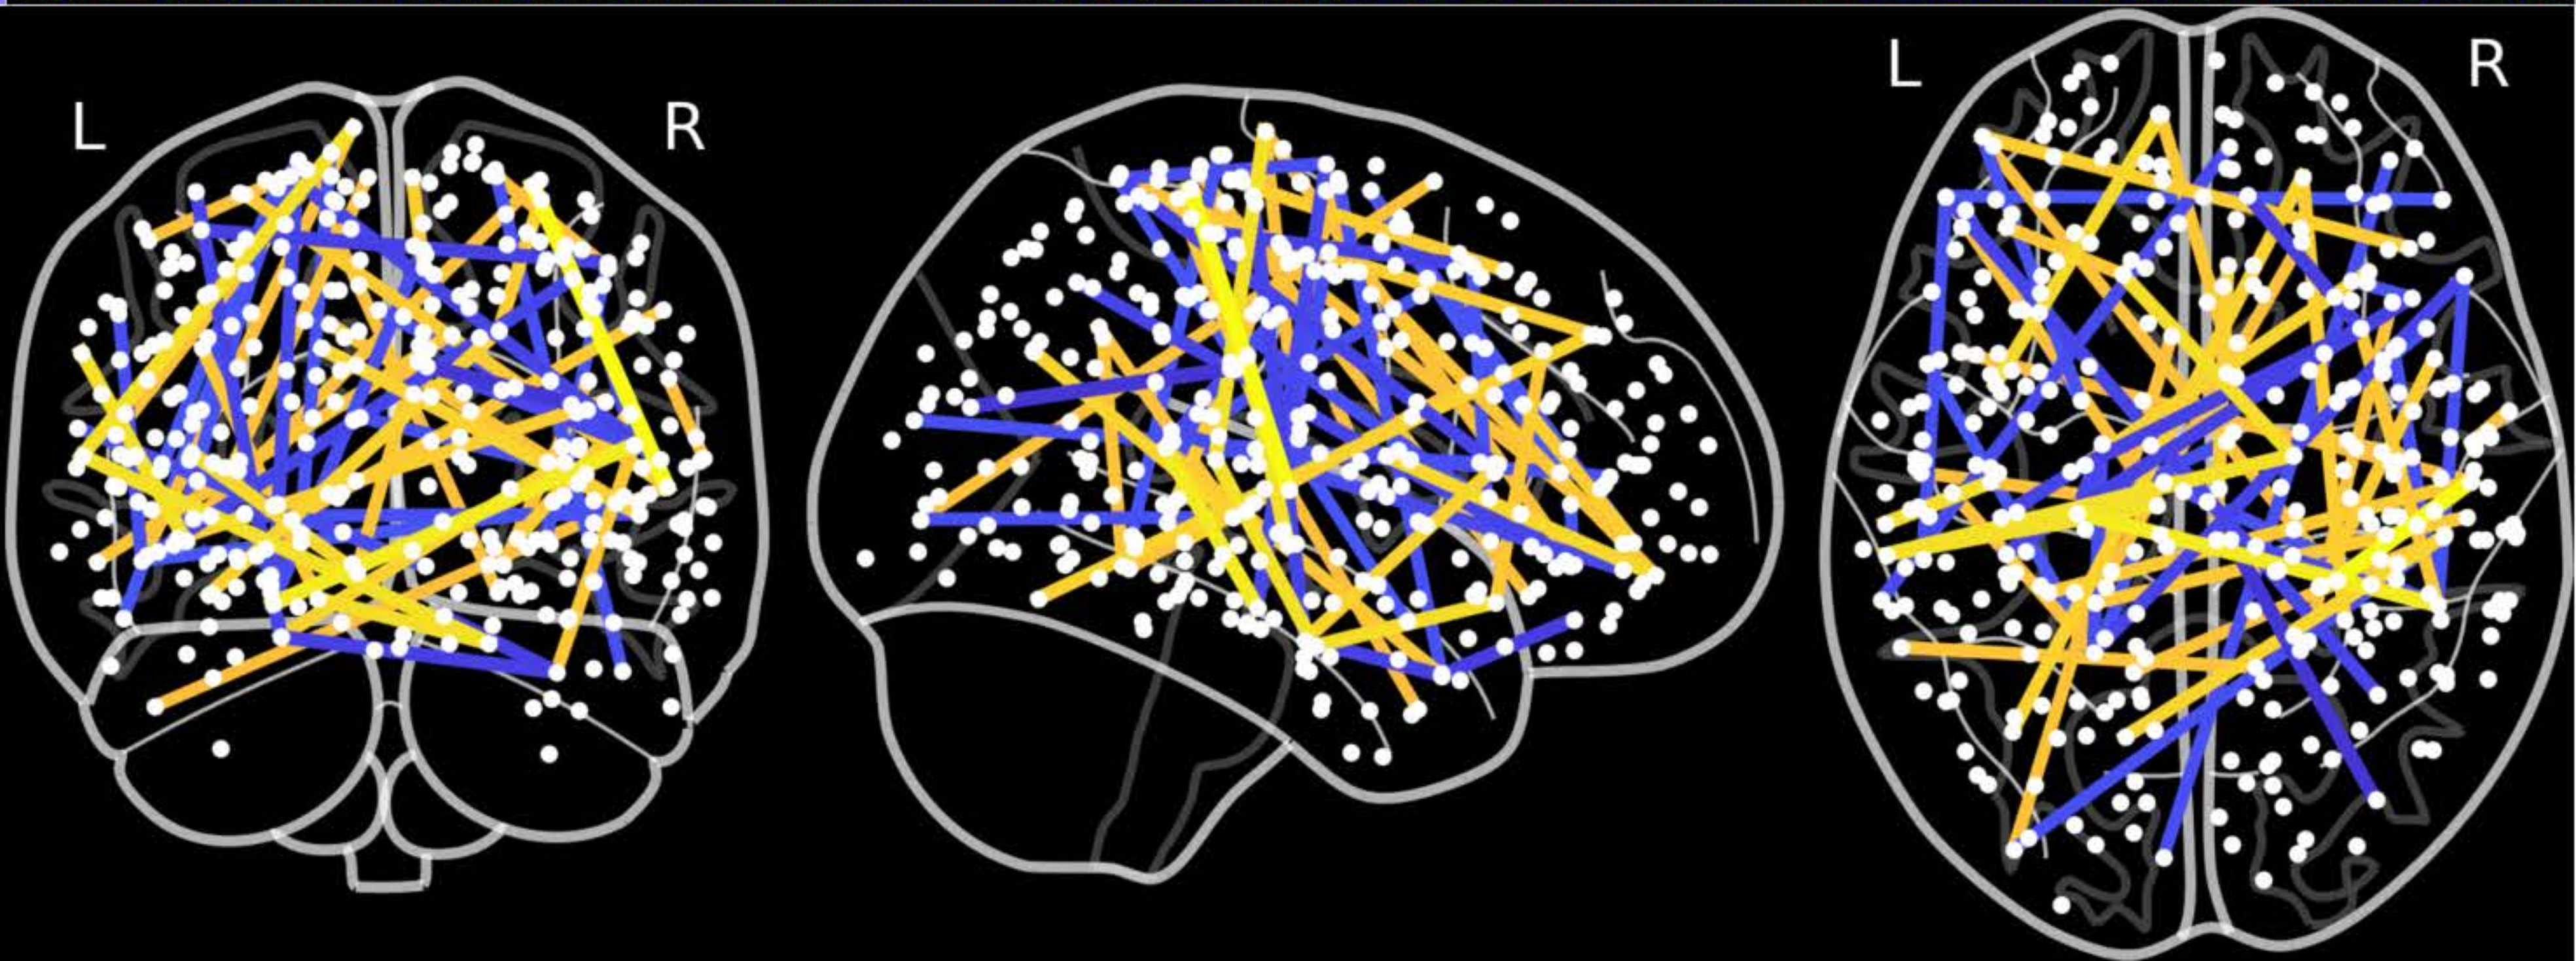



component\_77

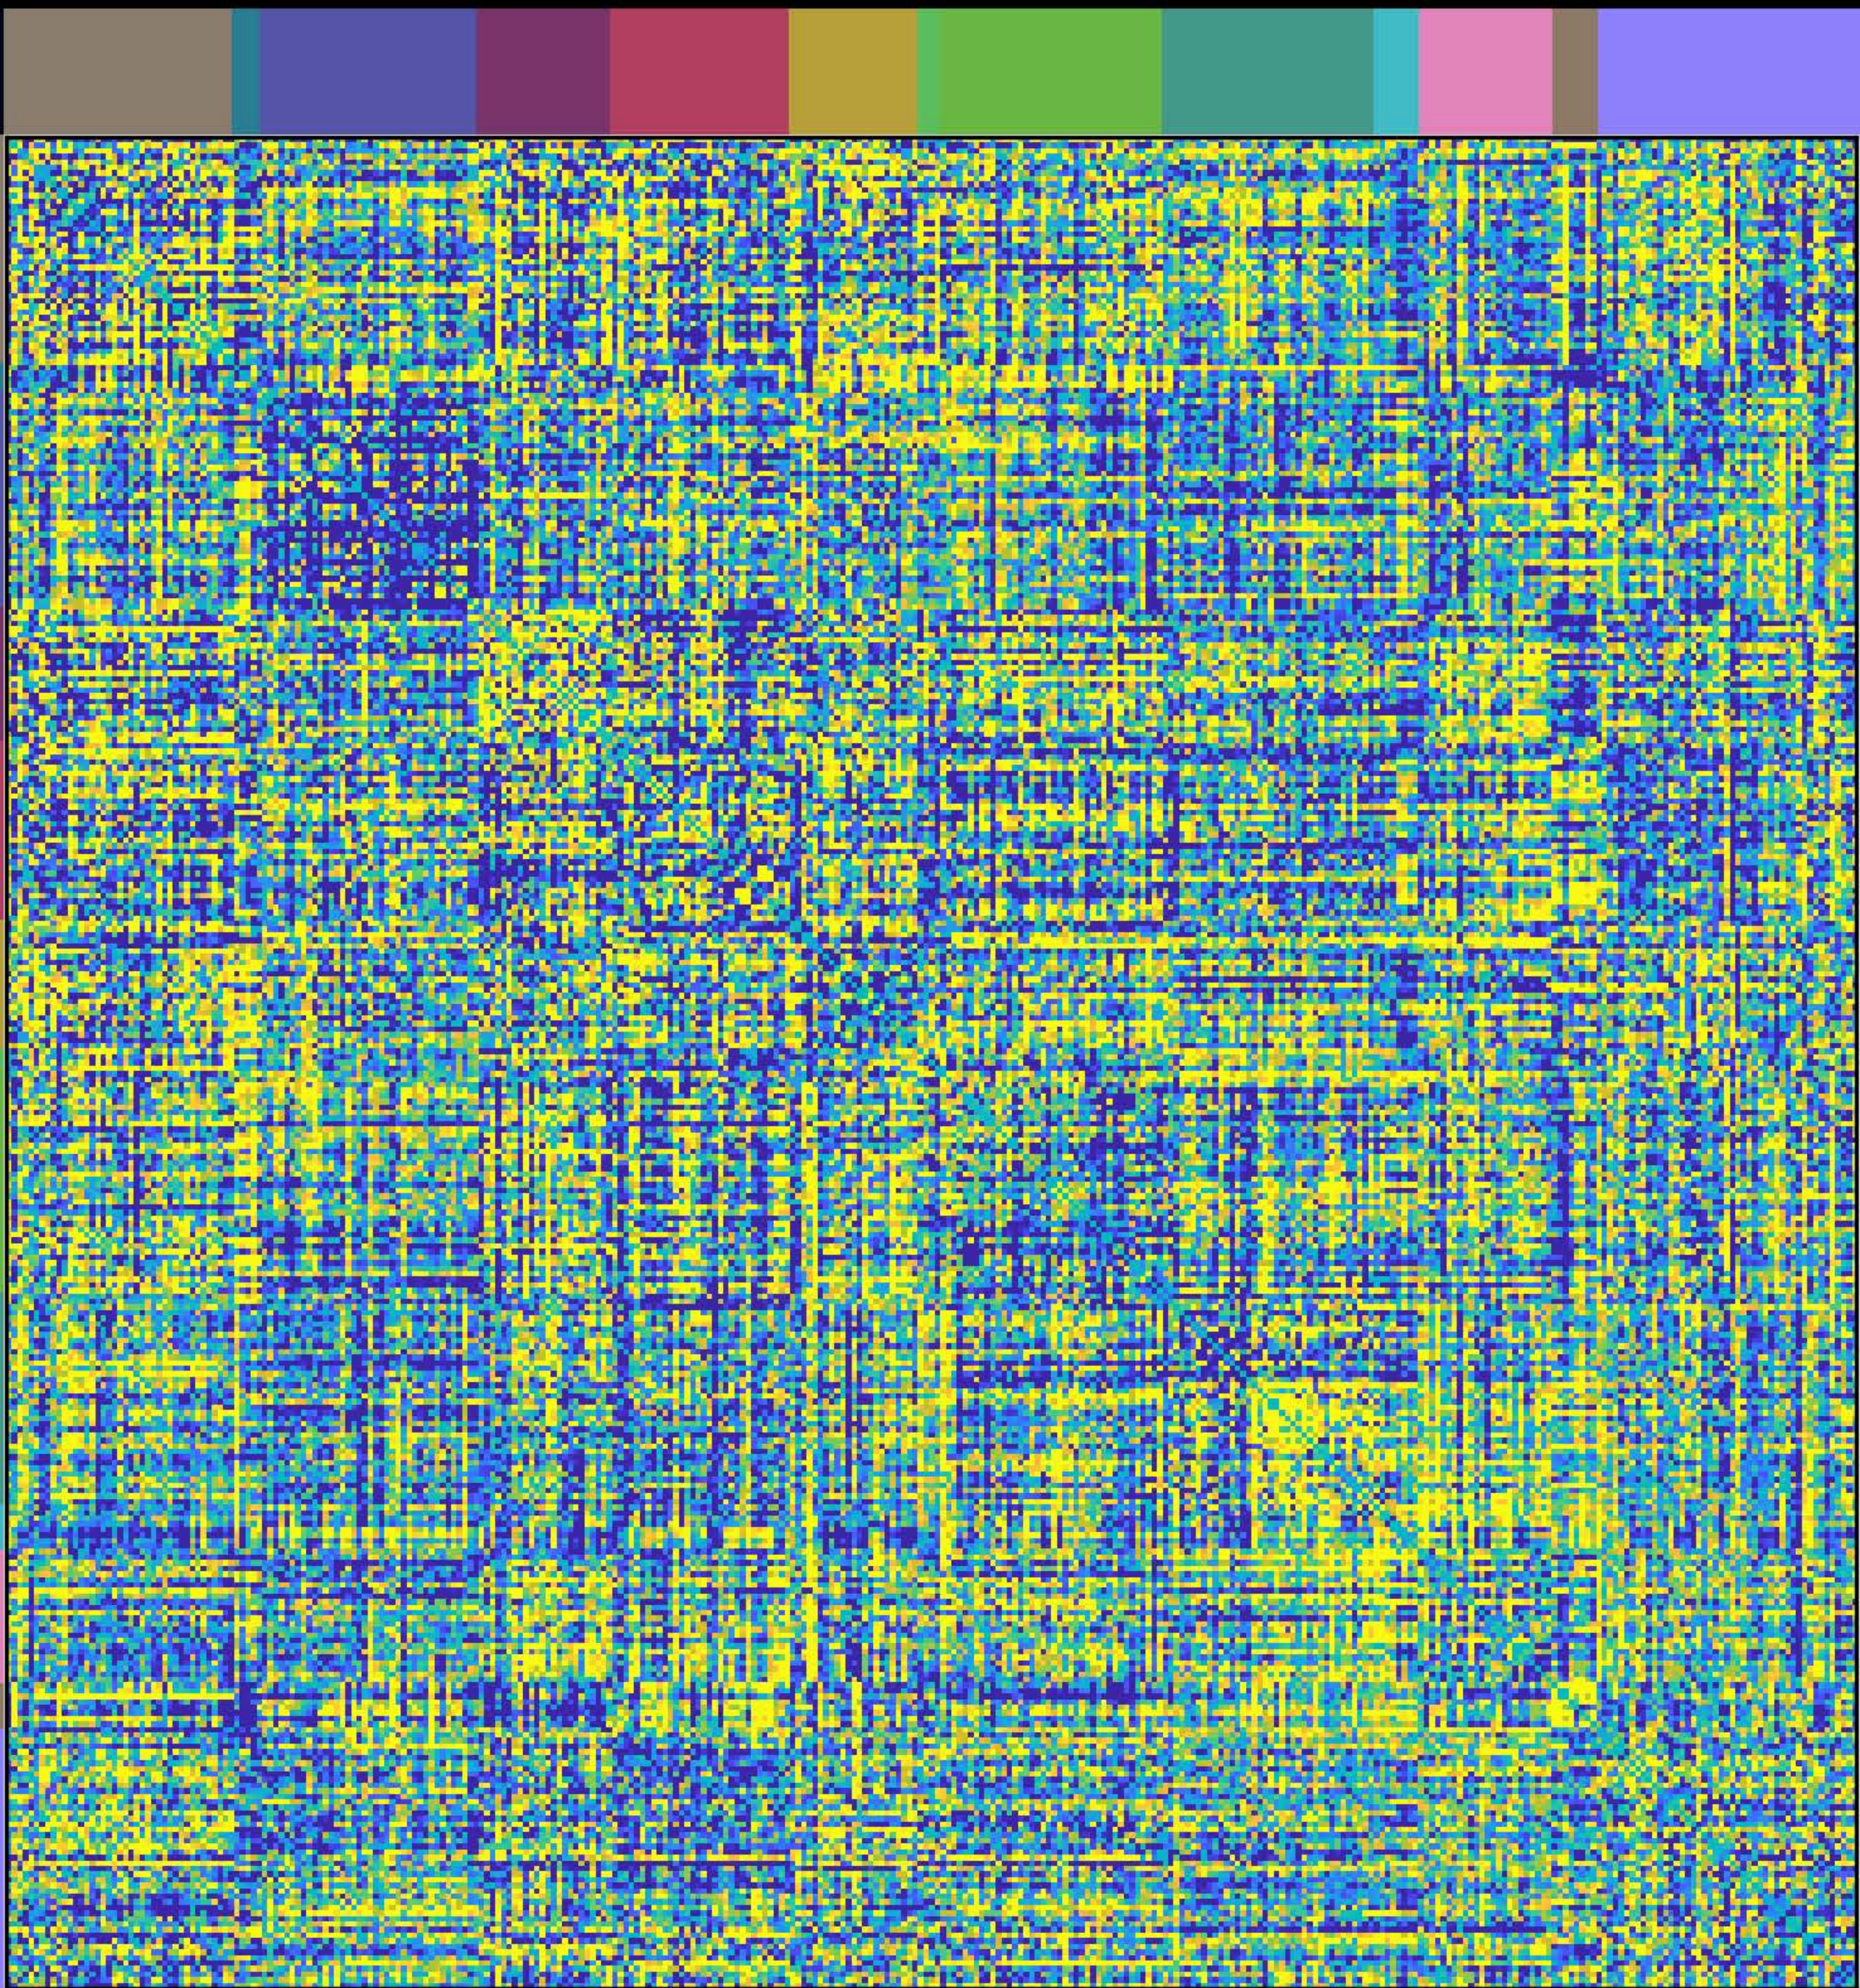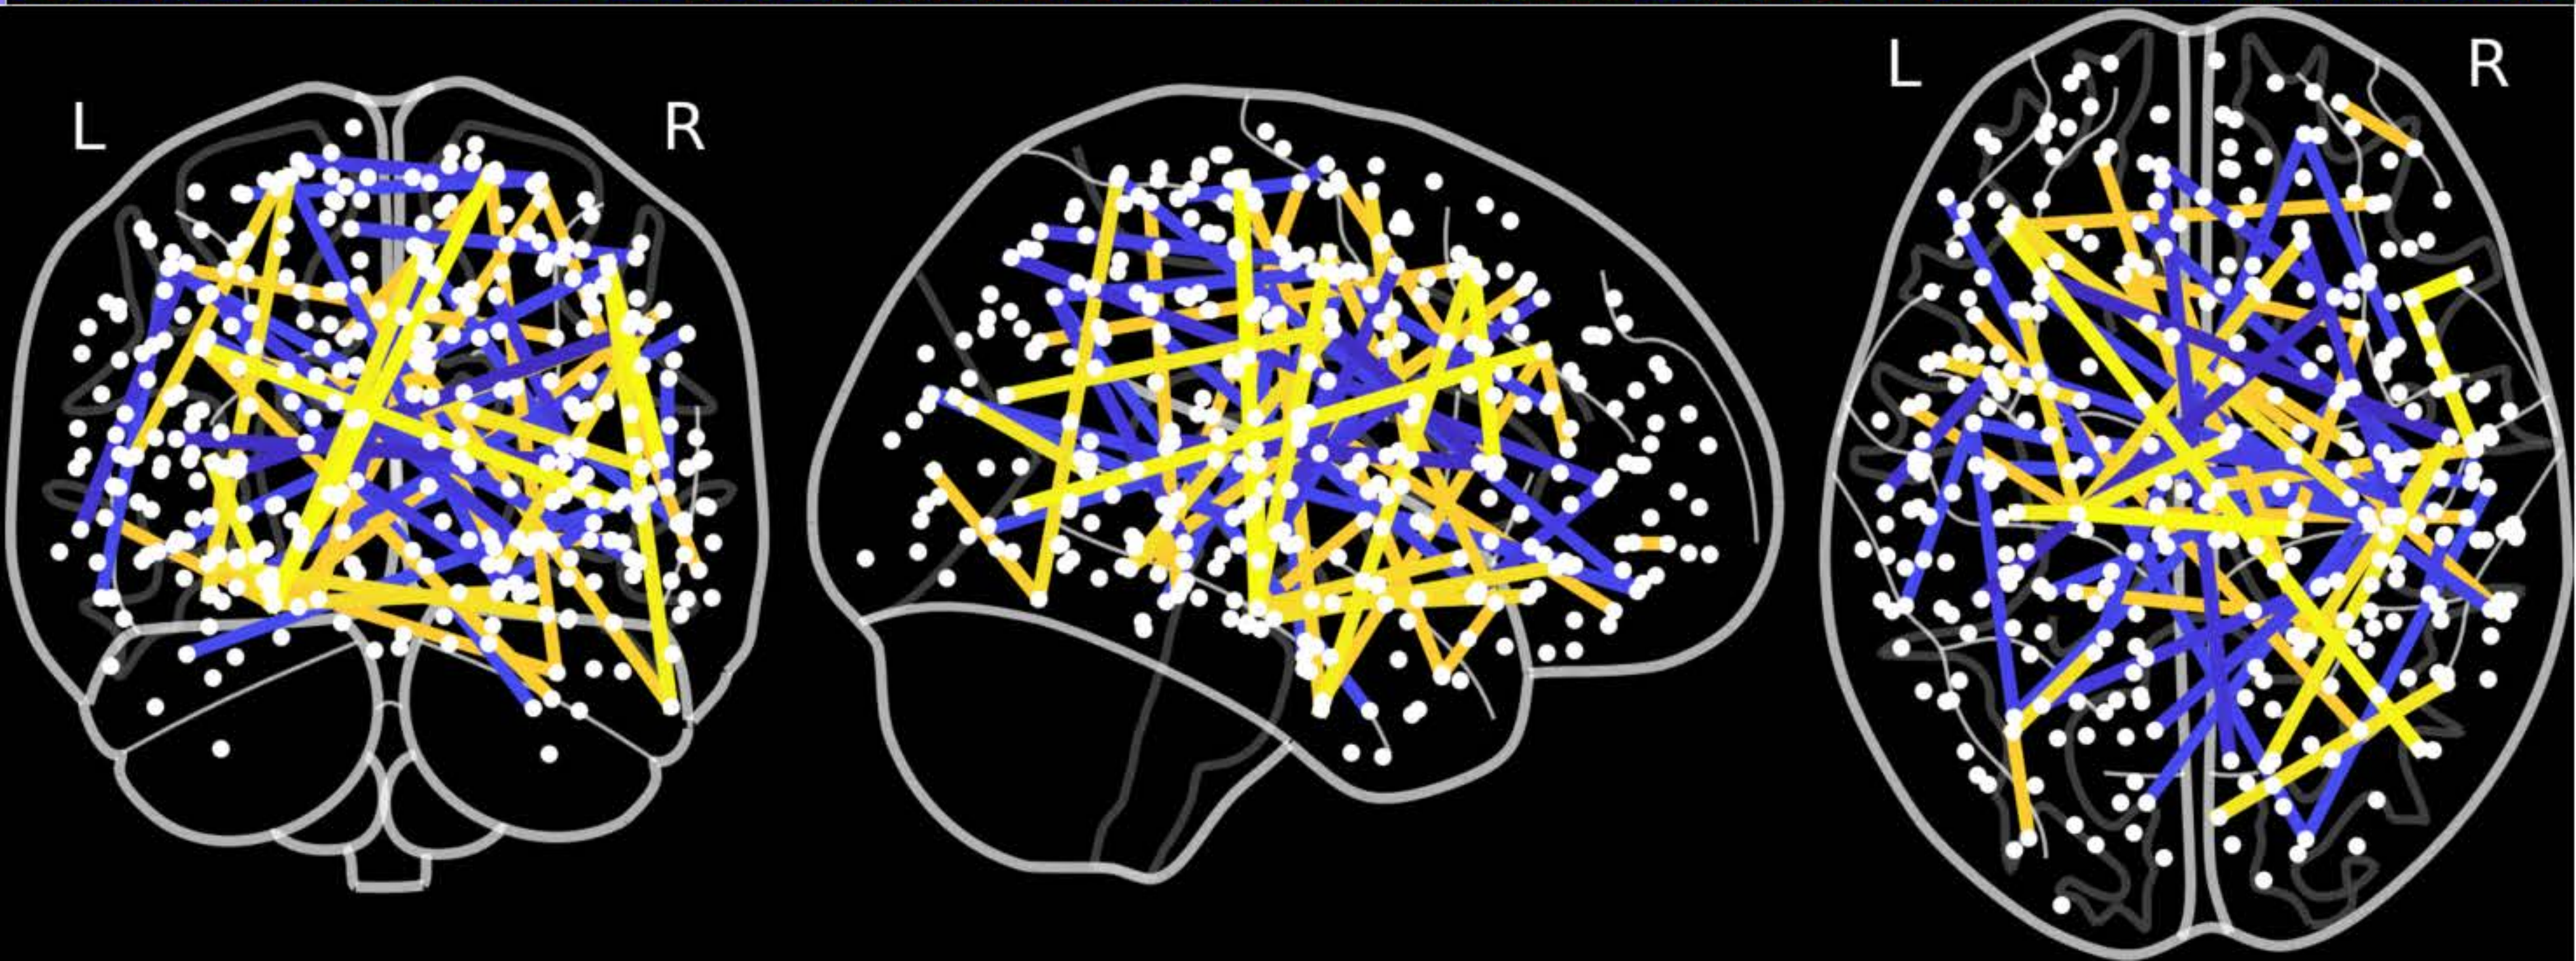



component\_78

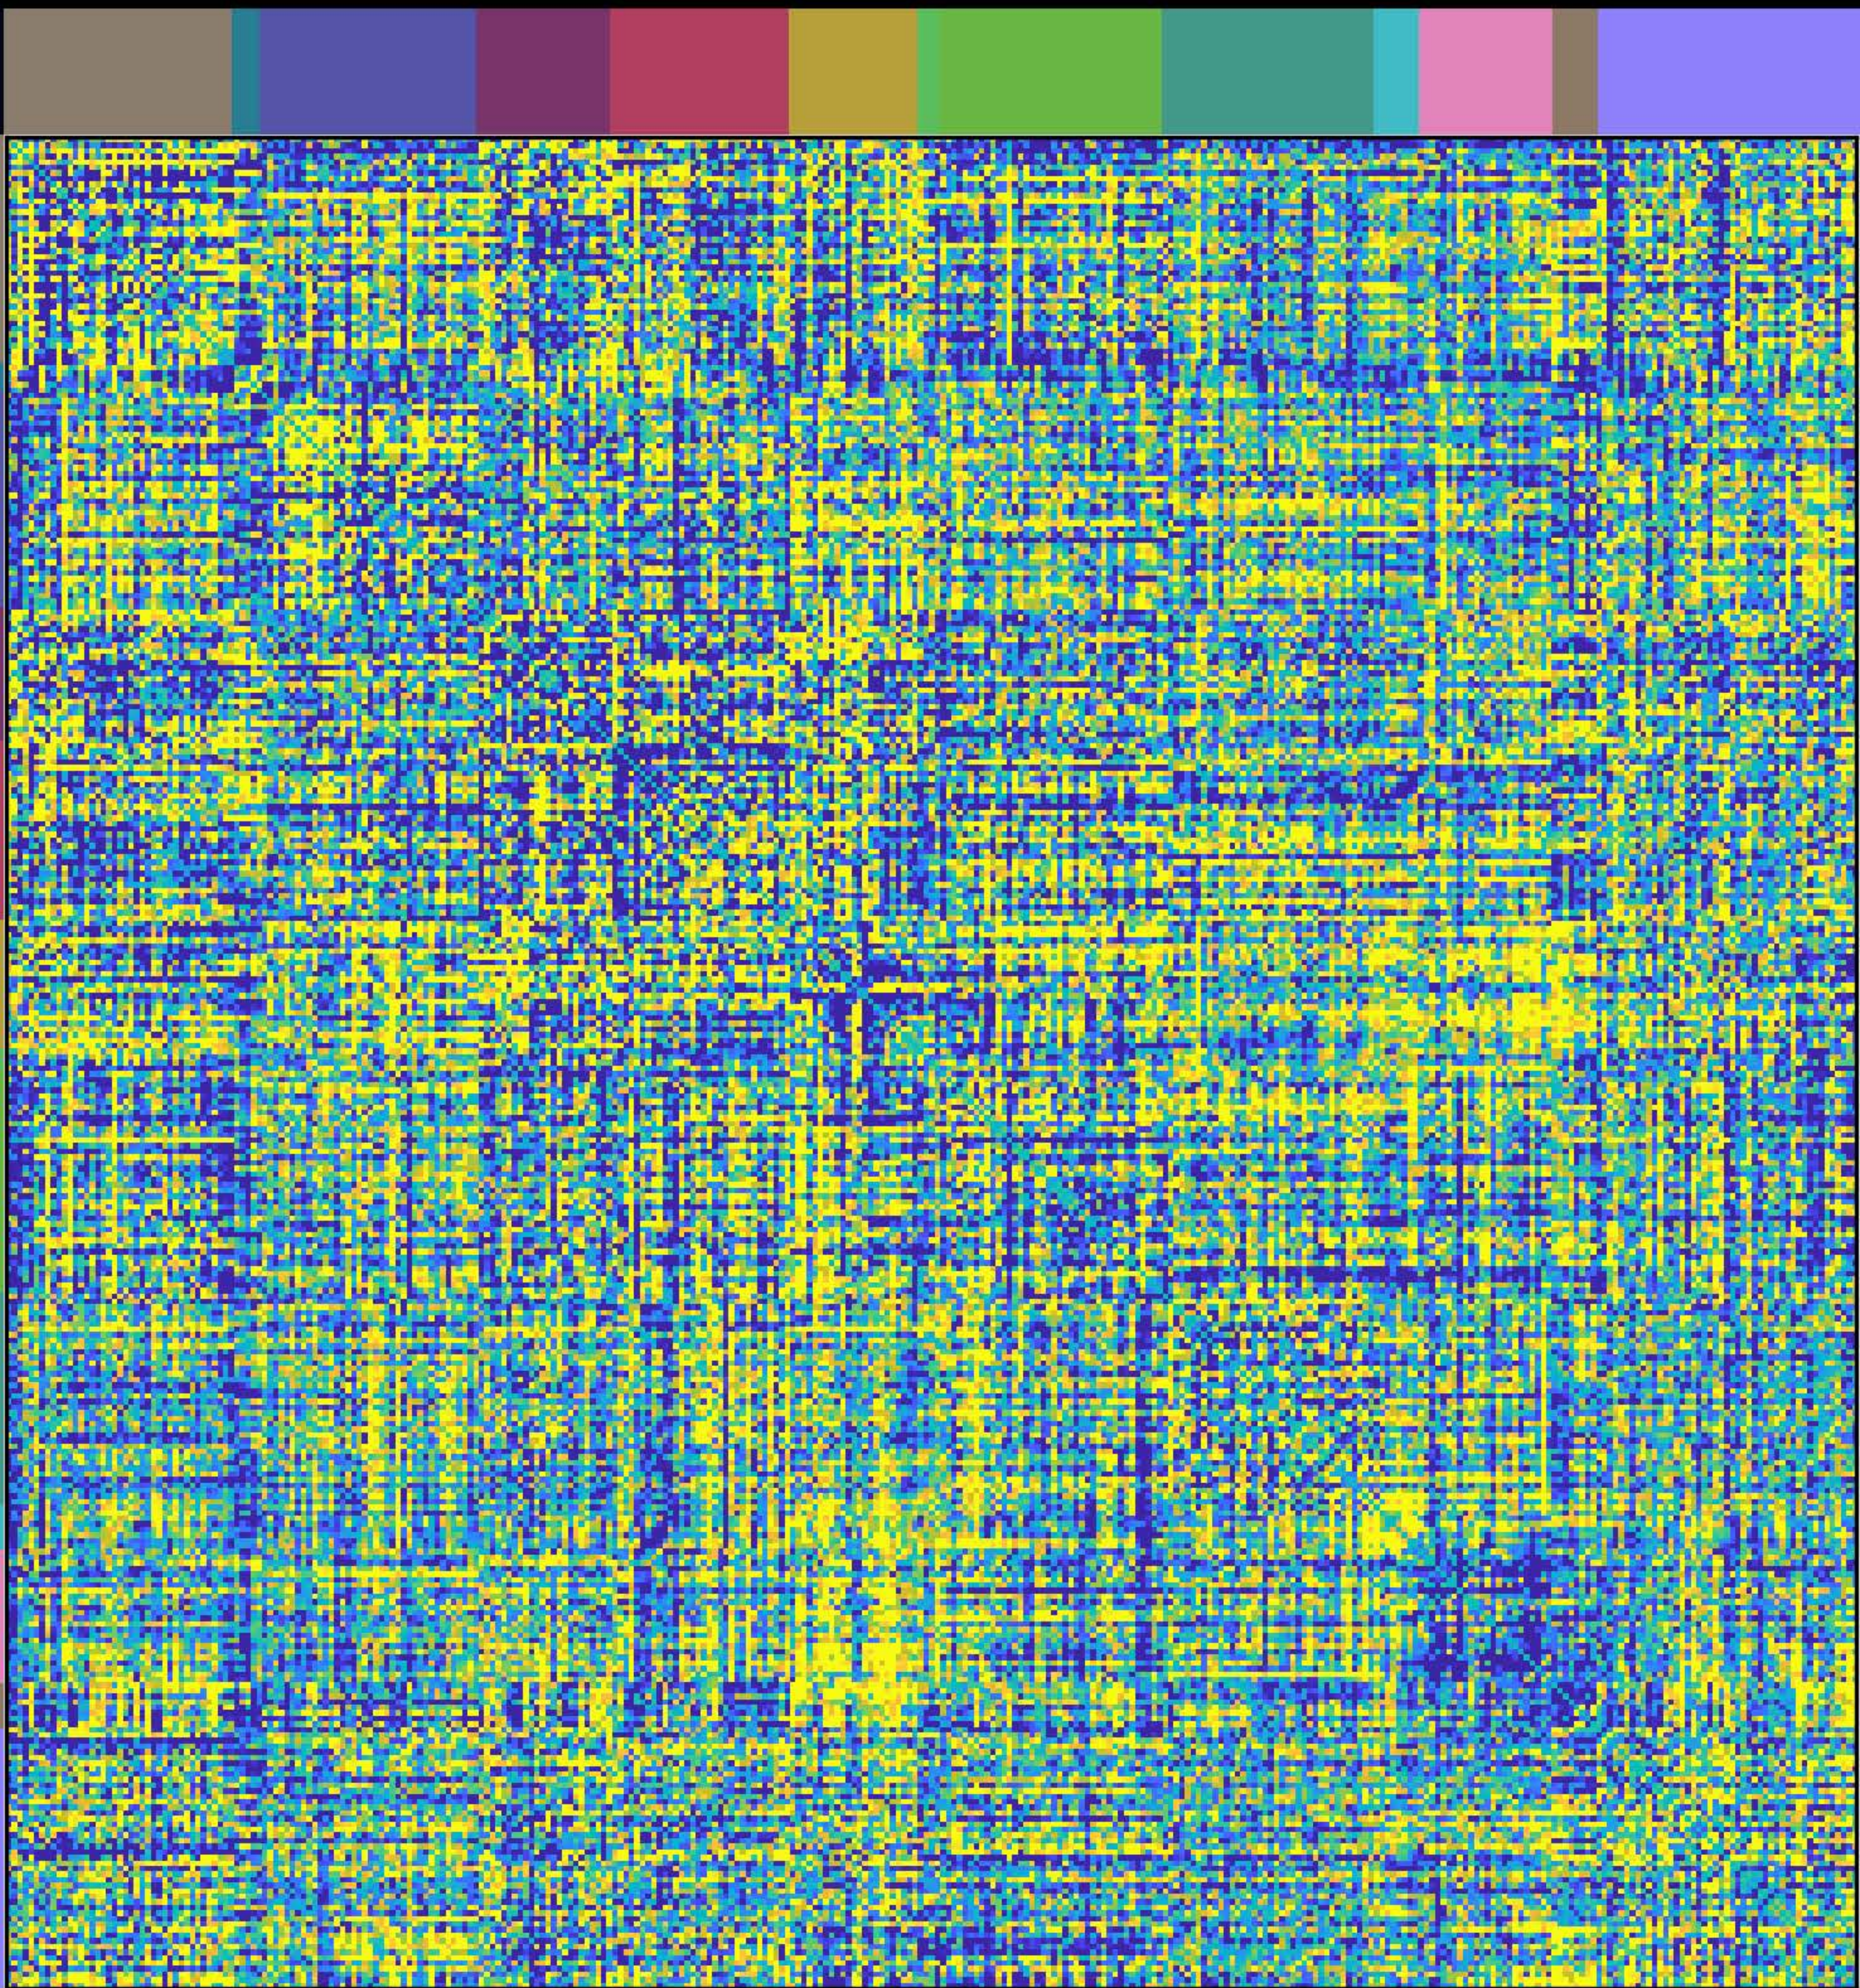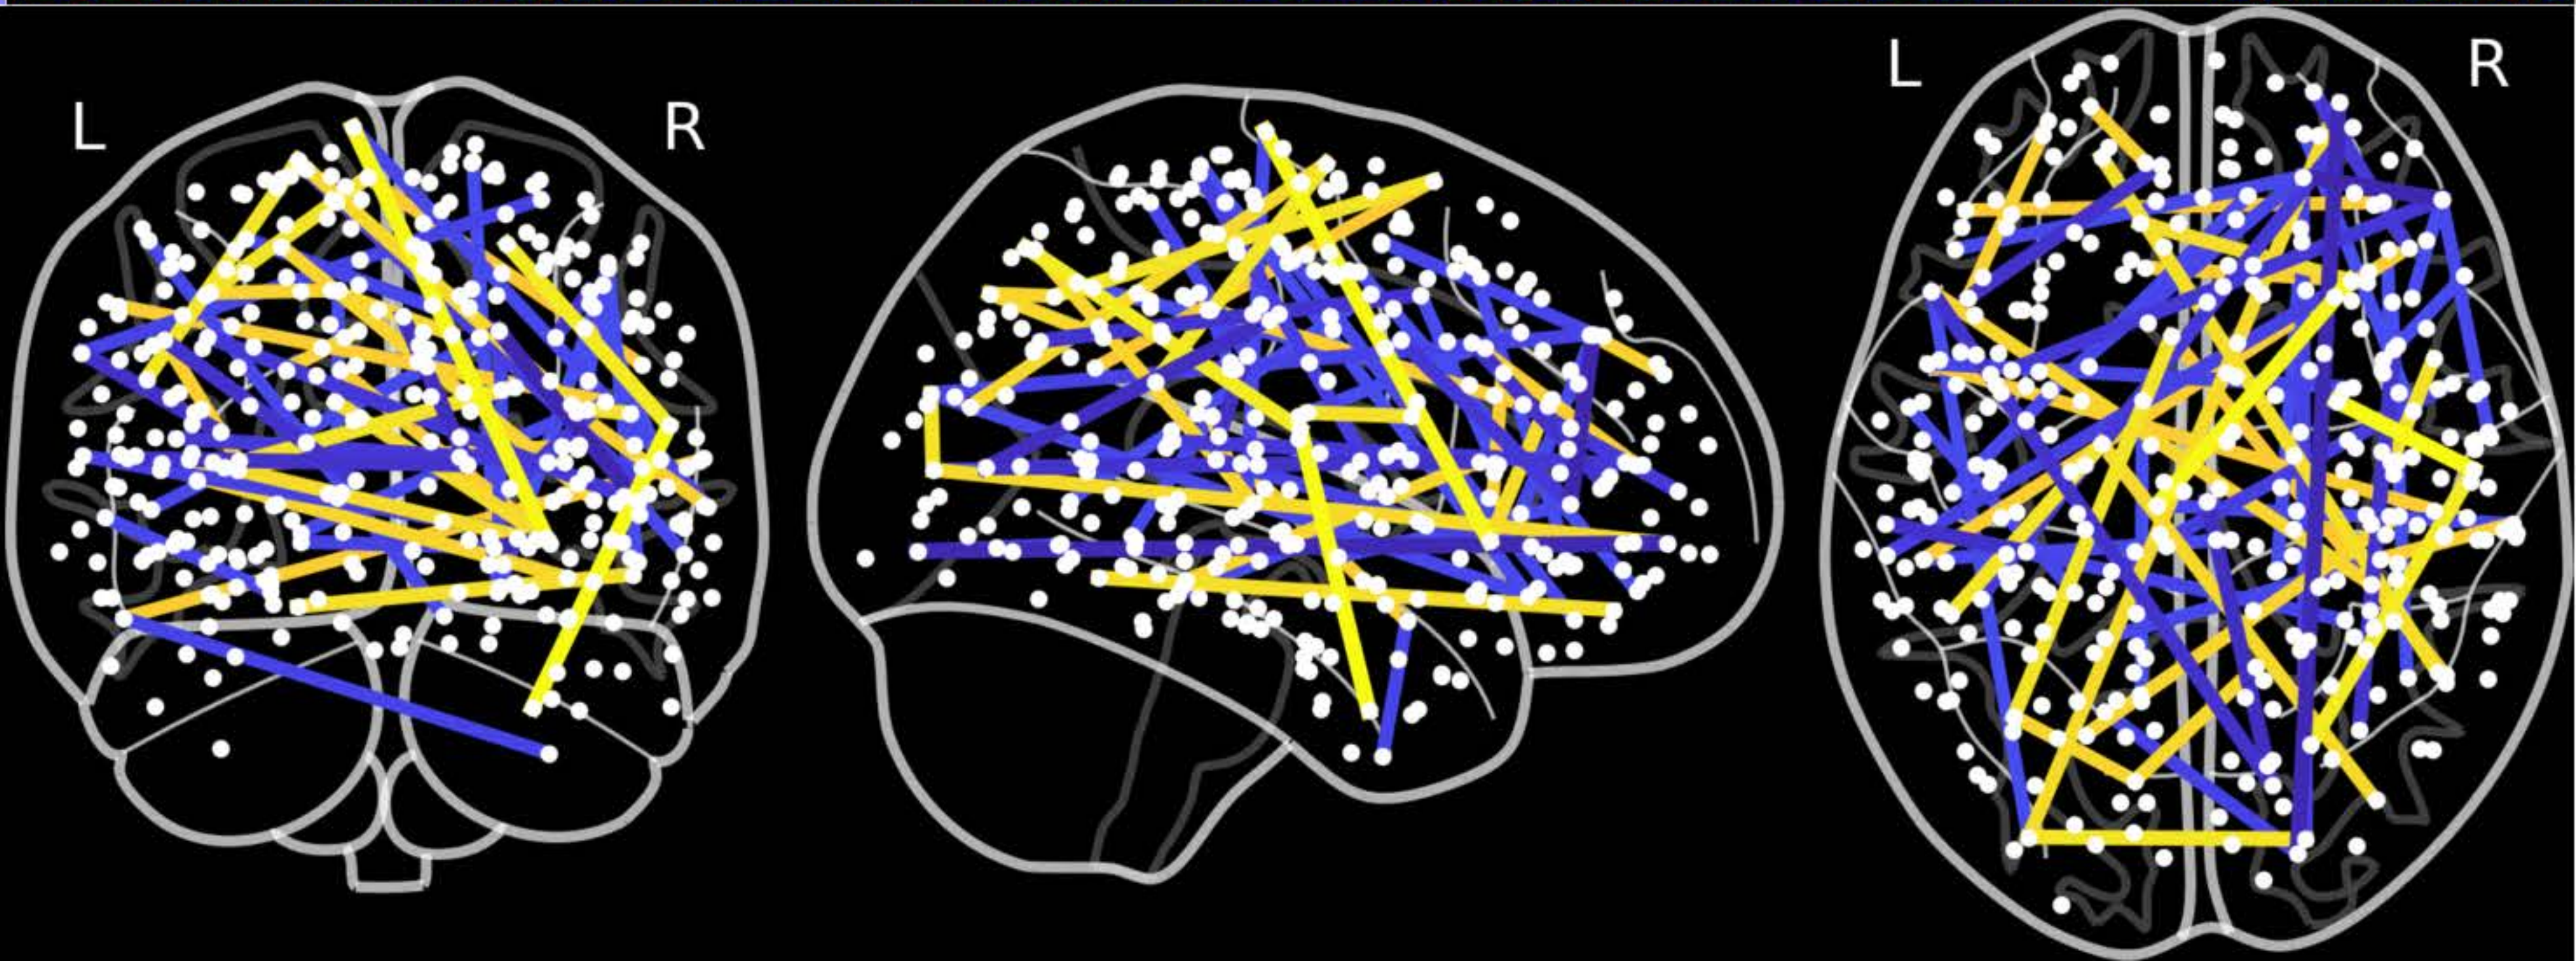



component\_79

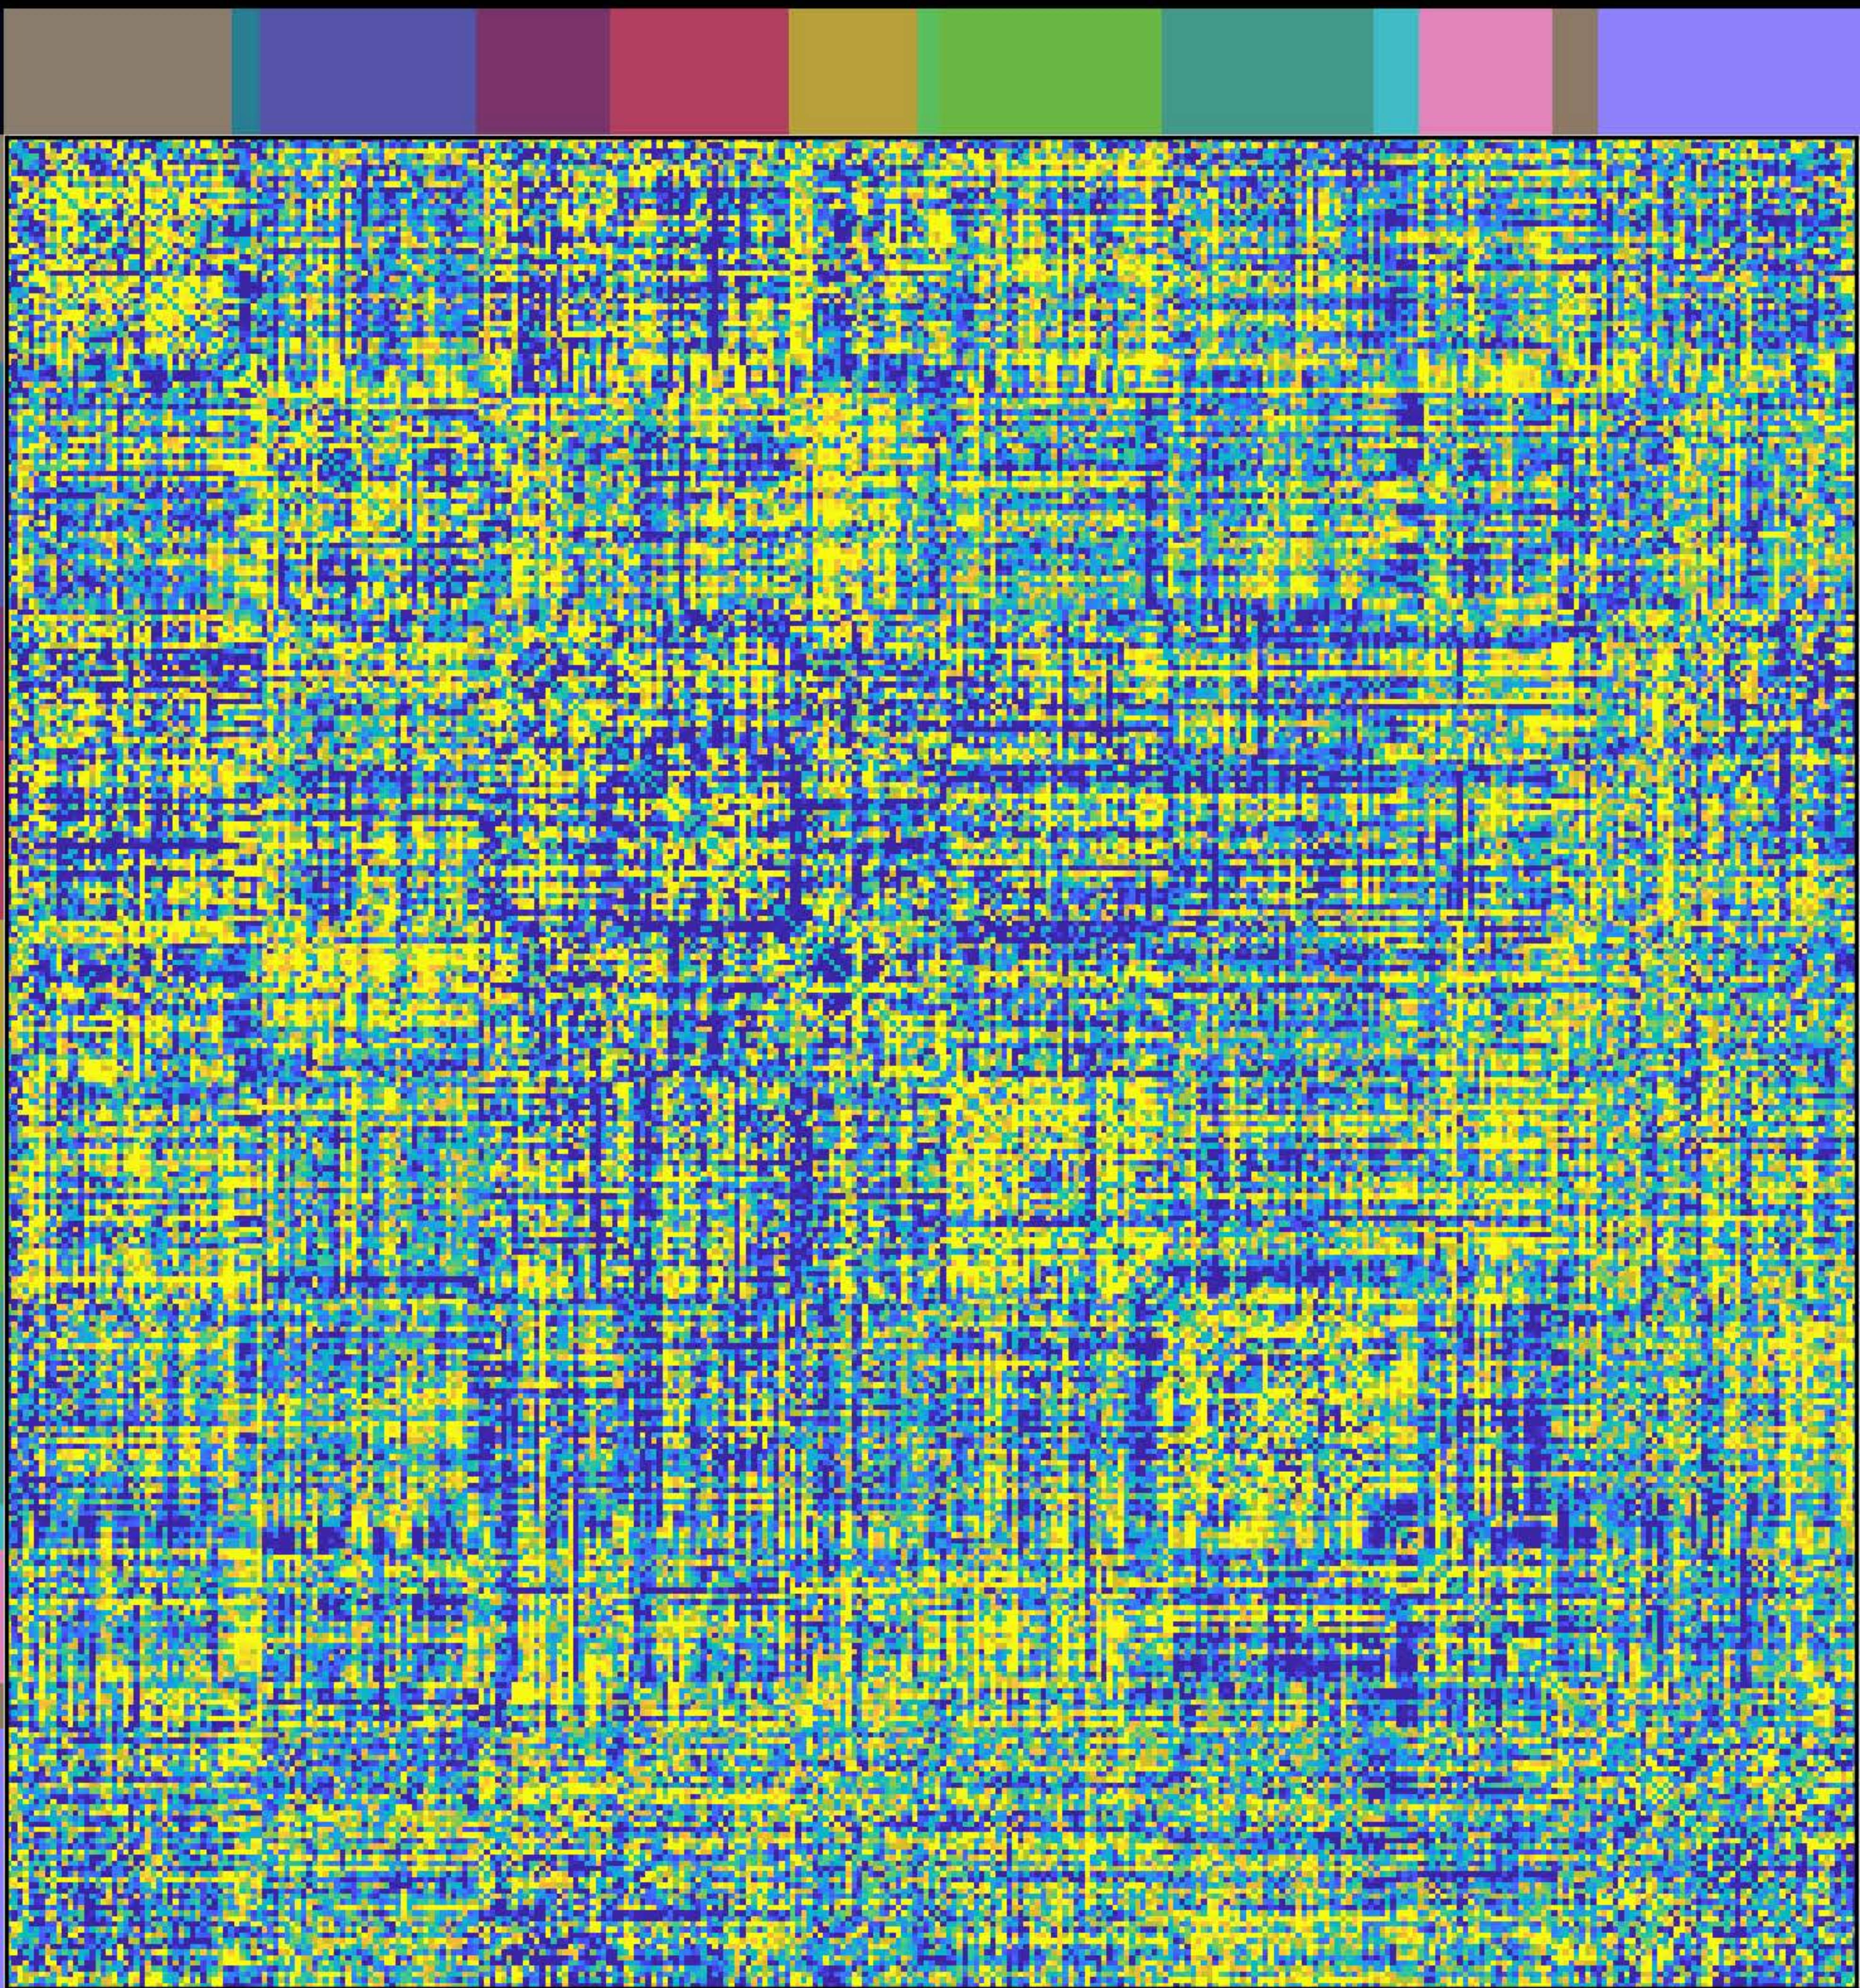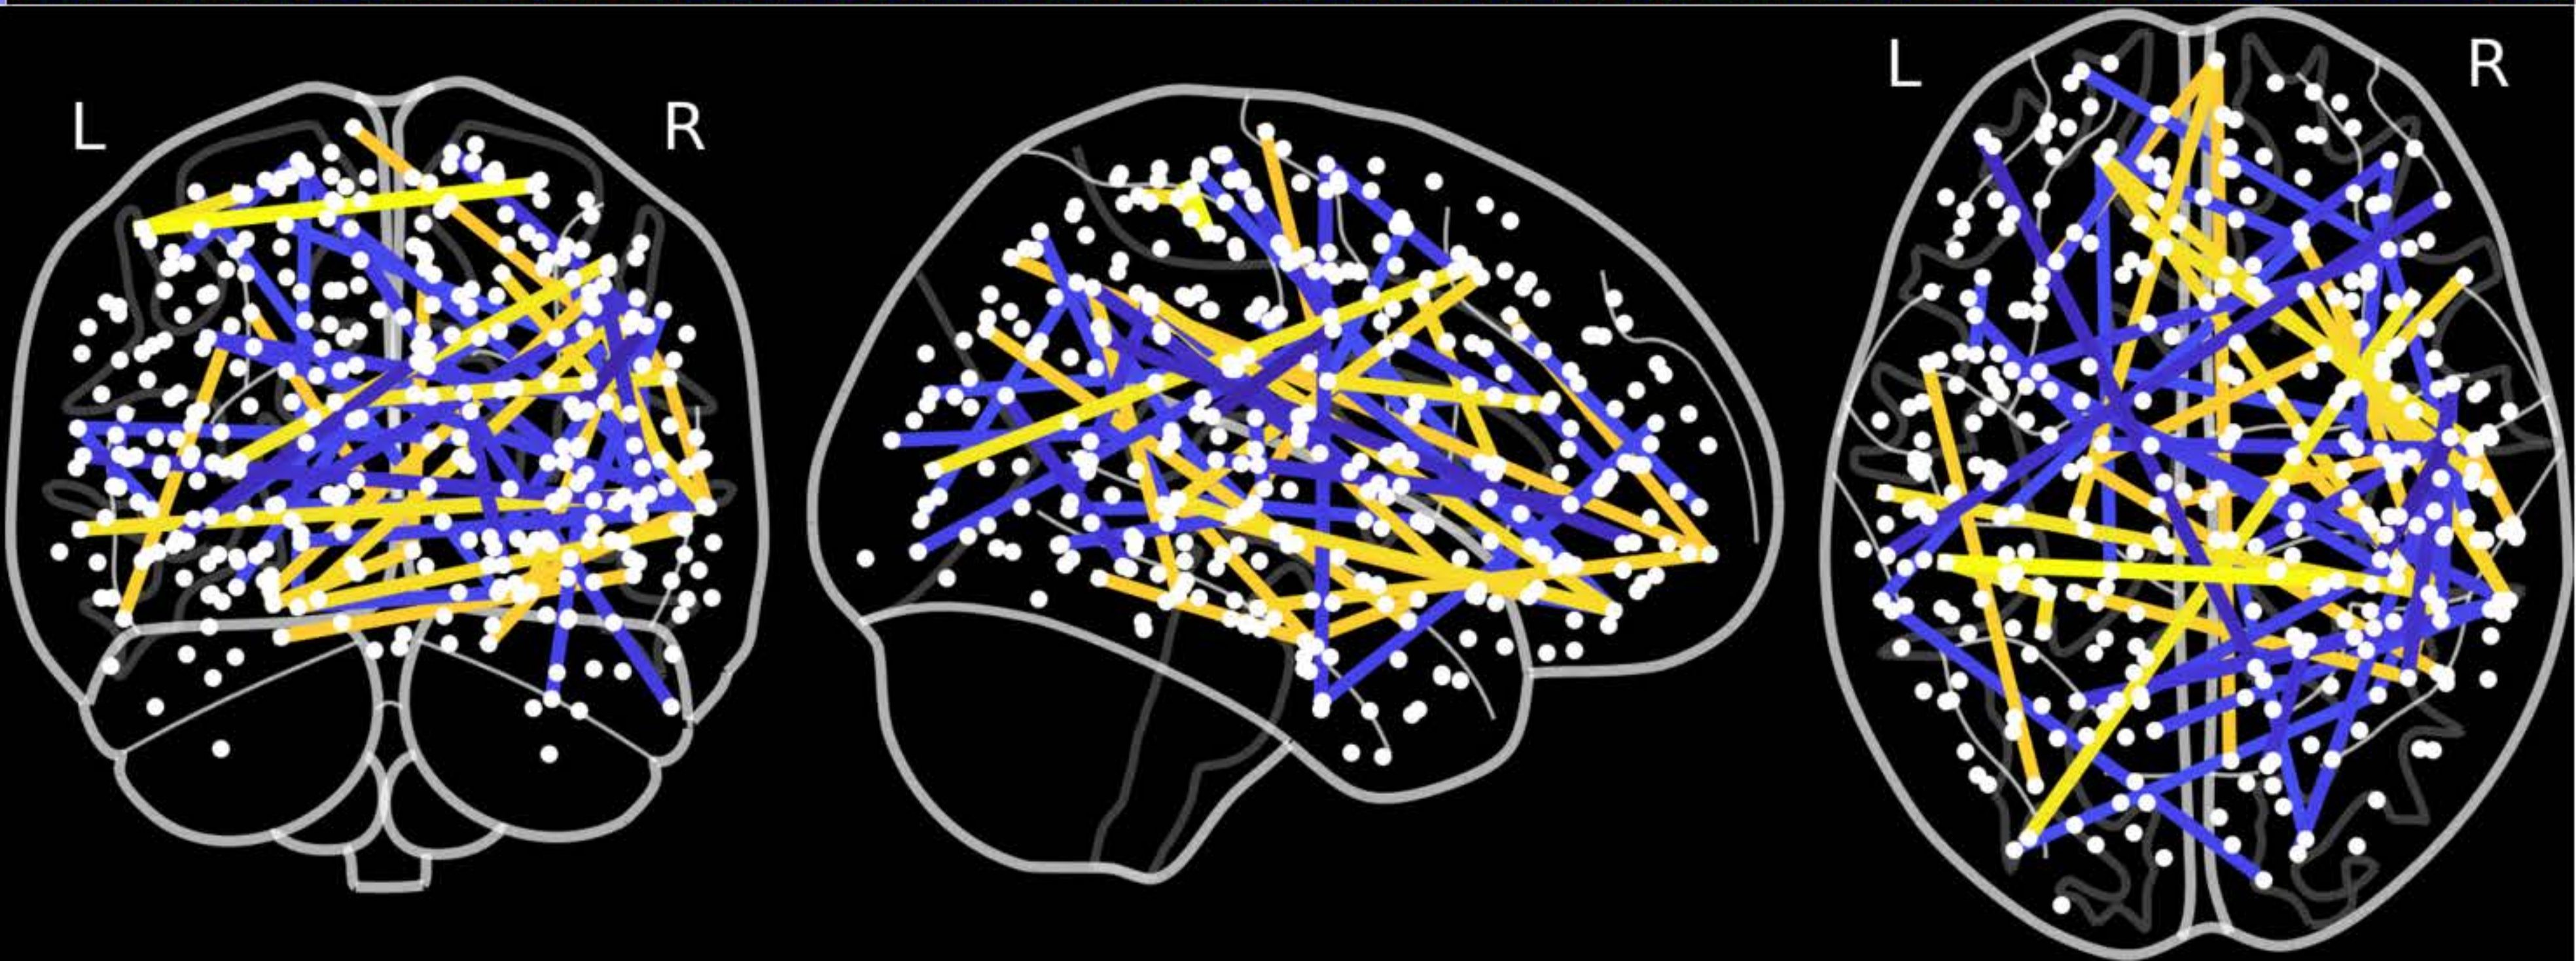



component\_80

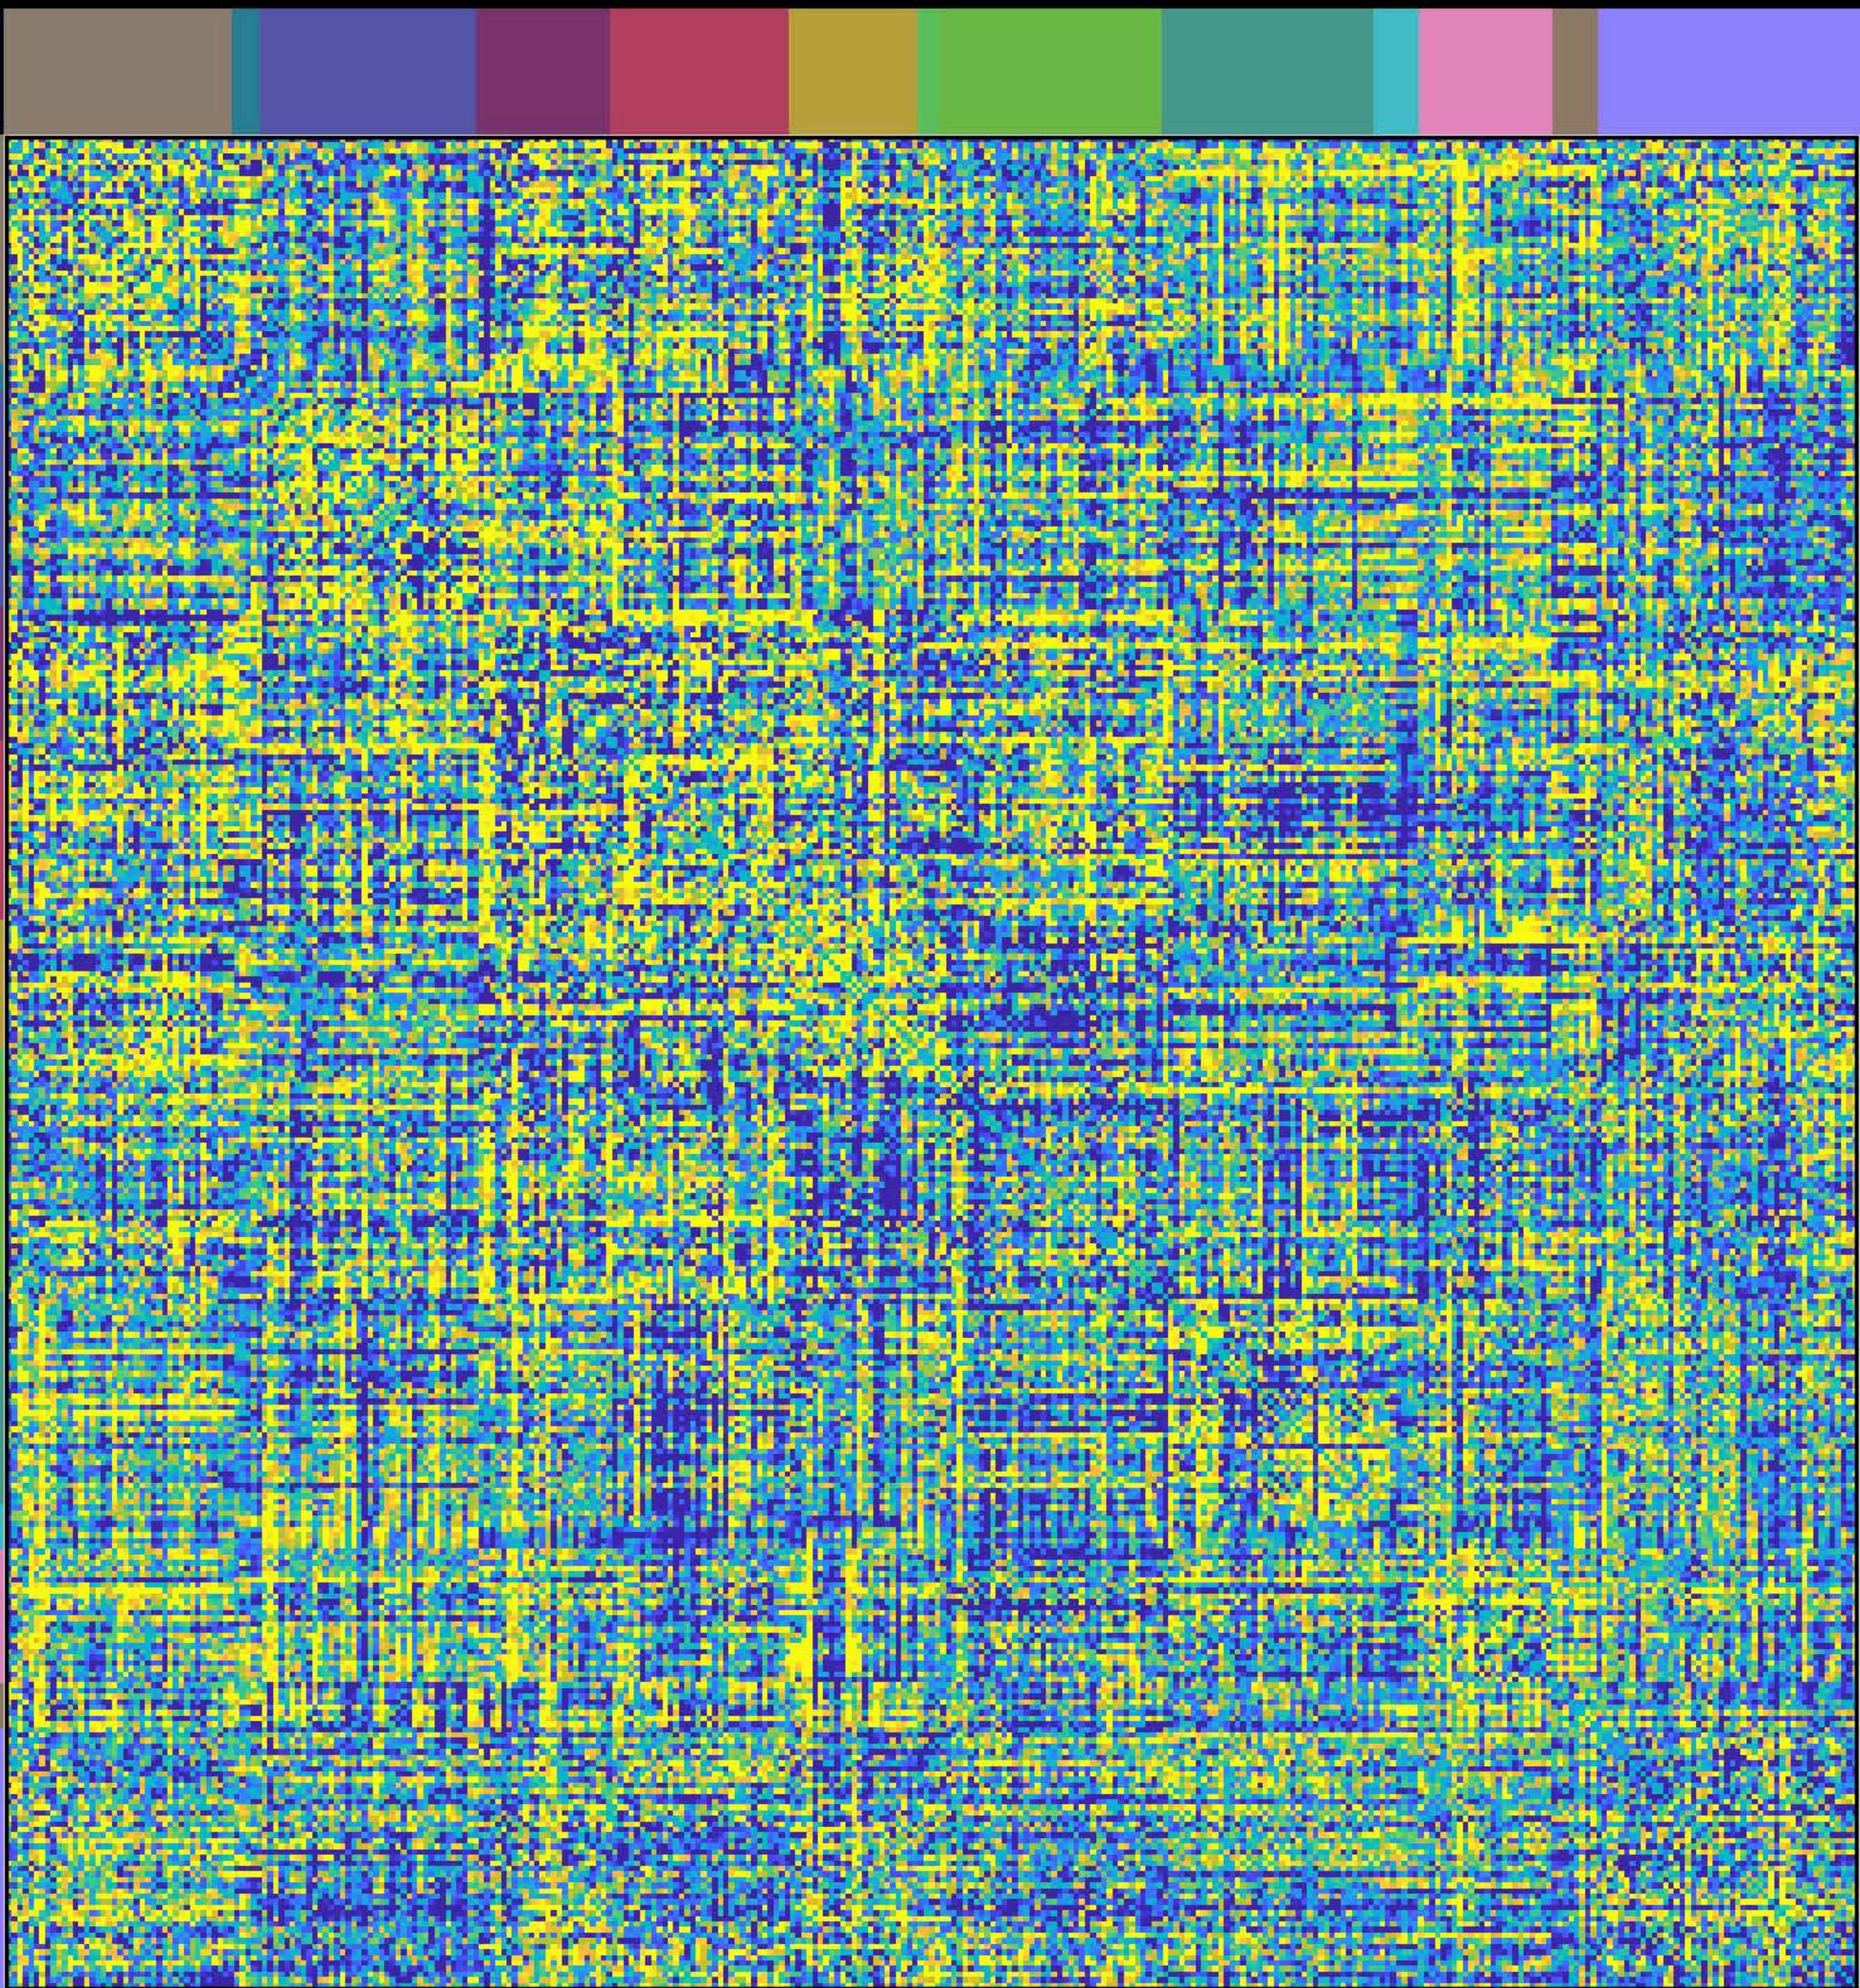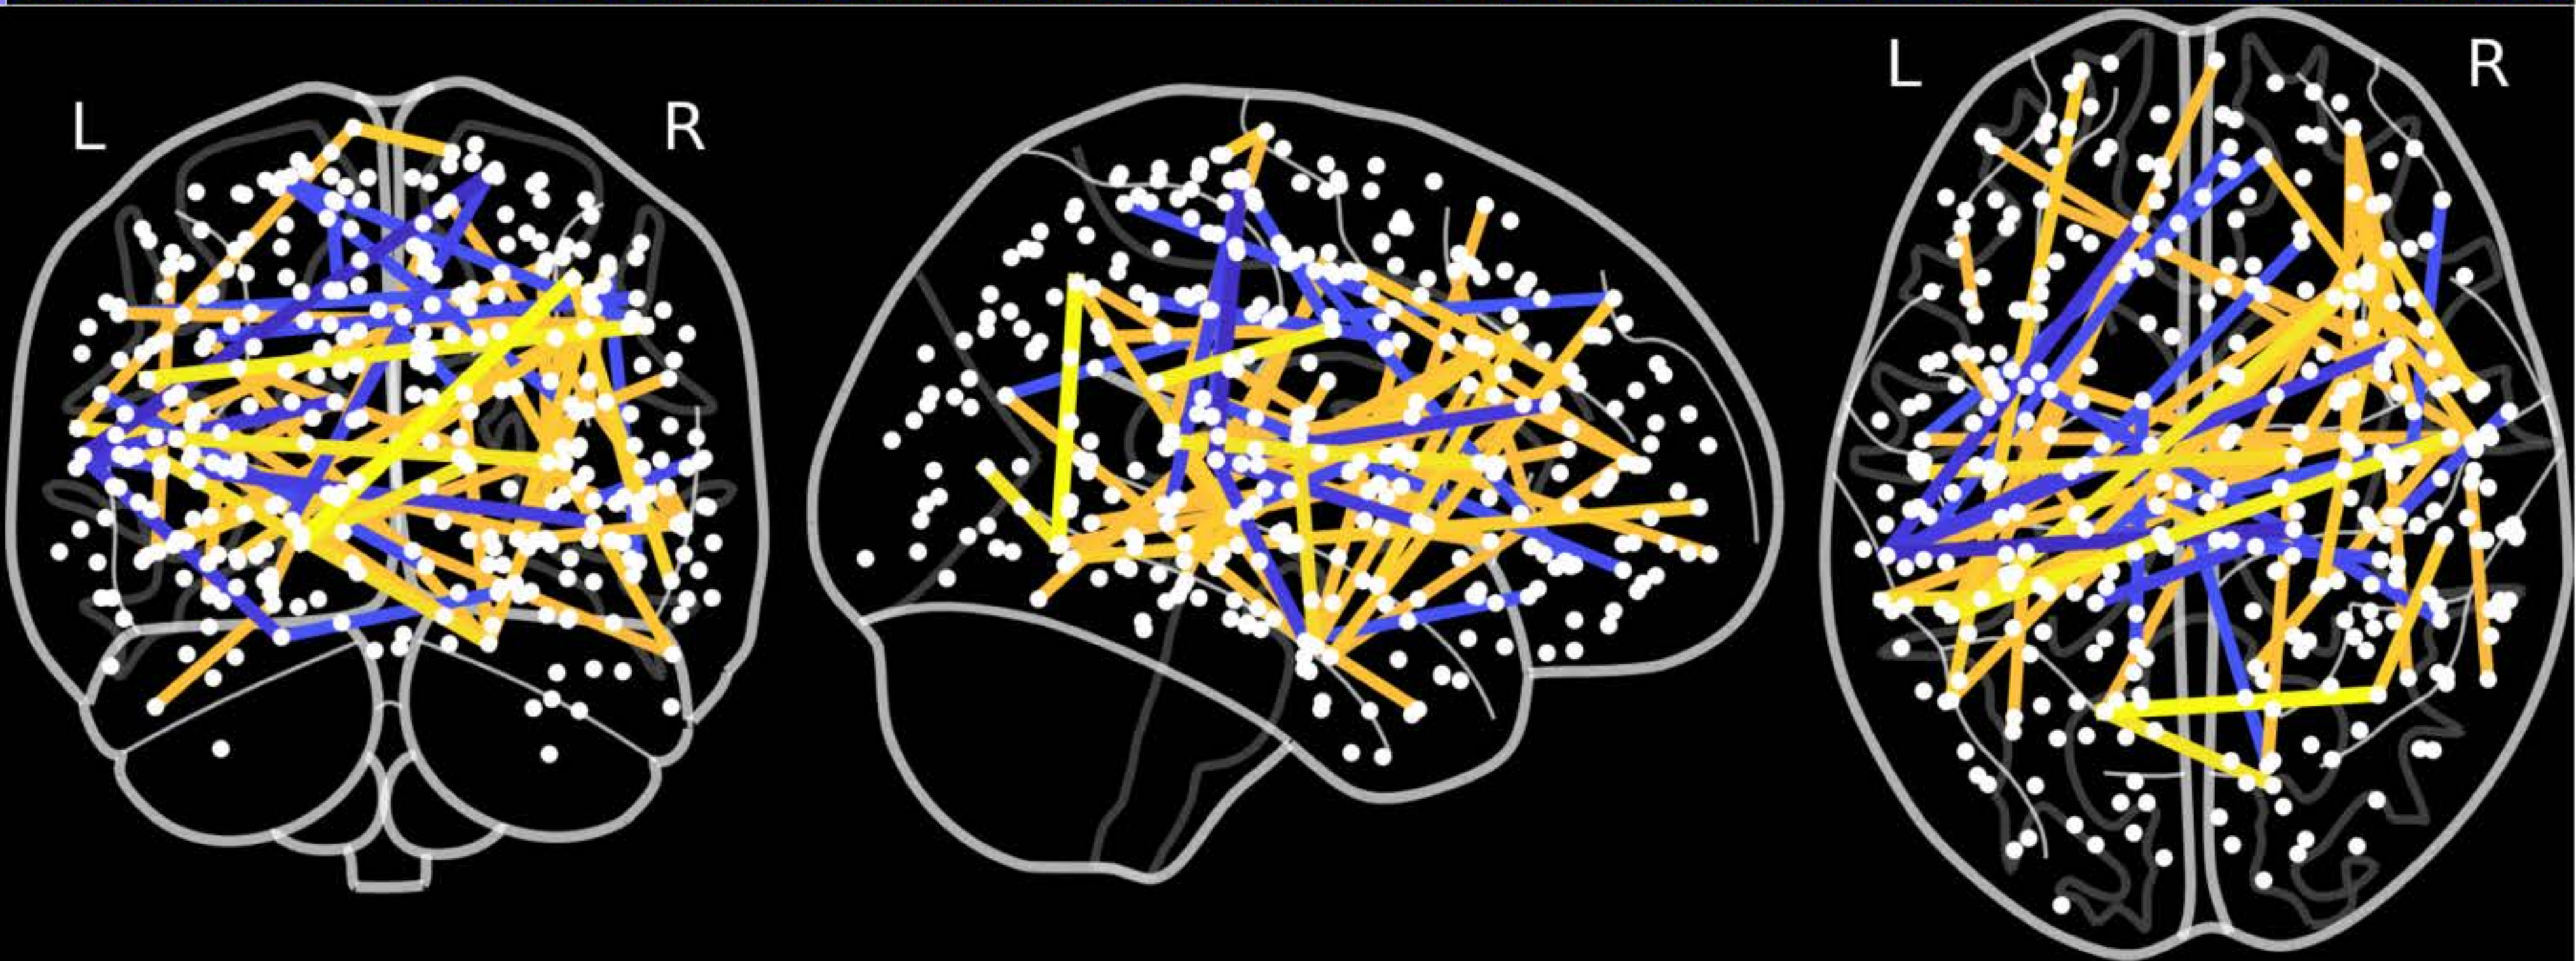



component\_81

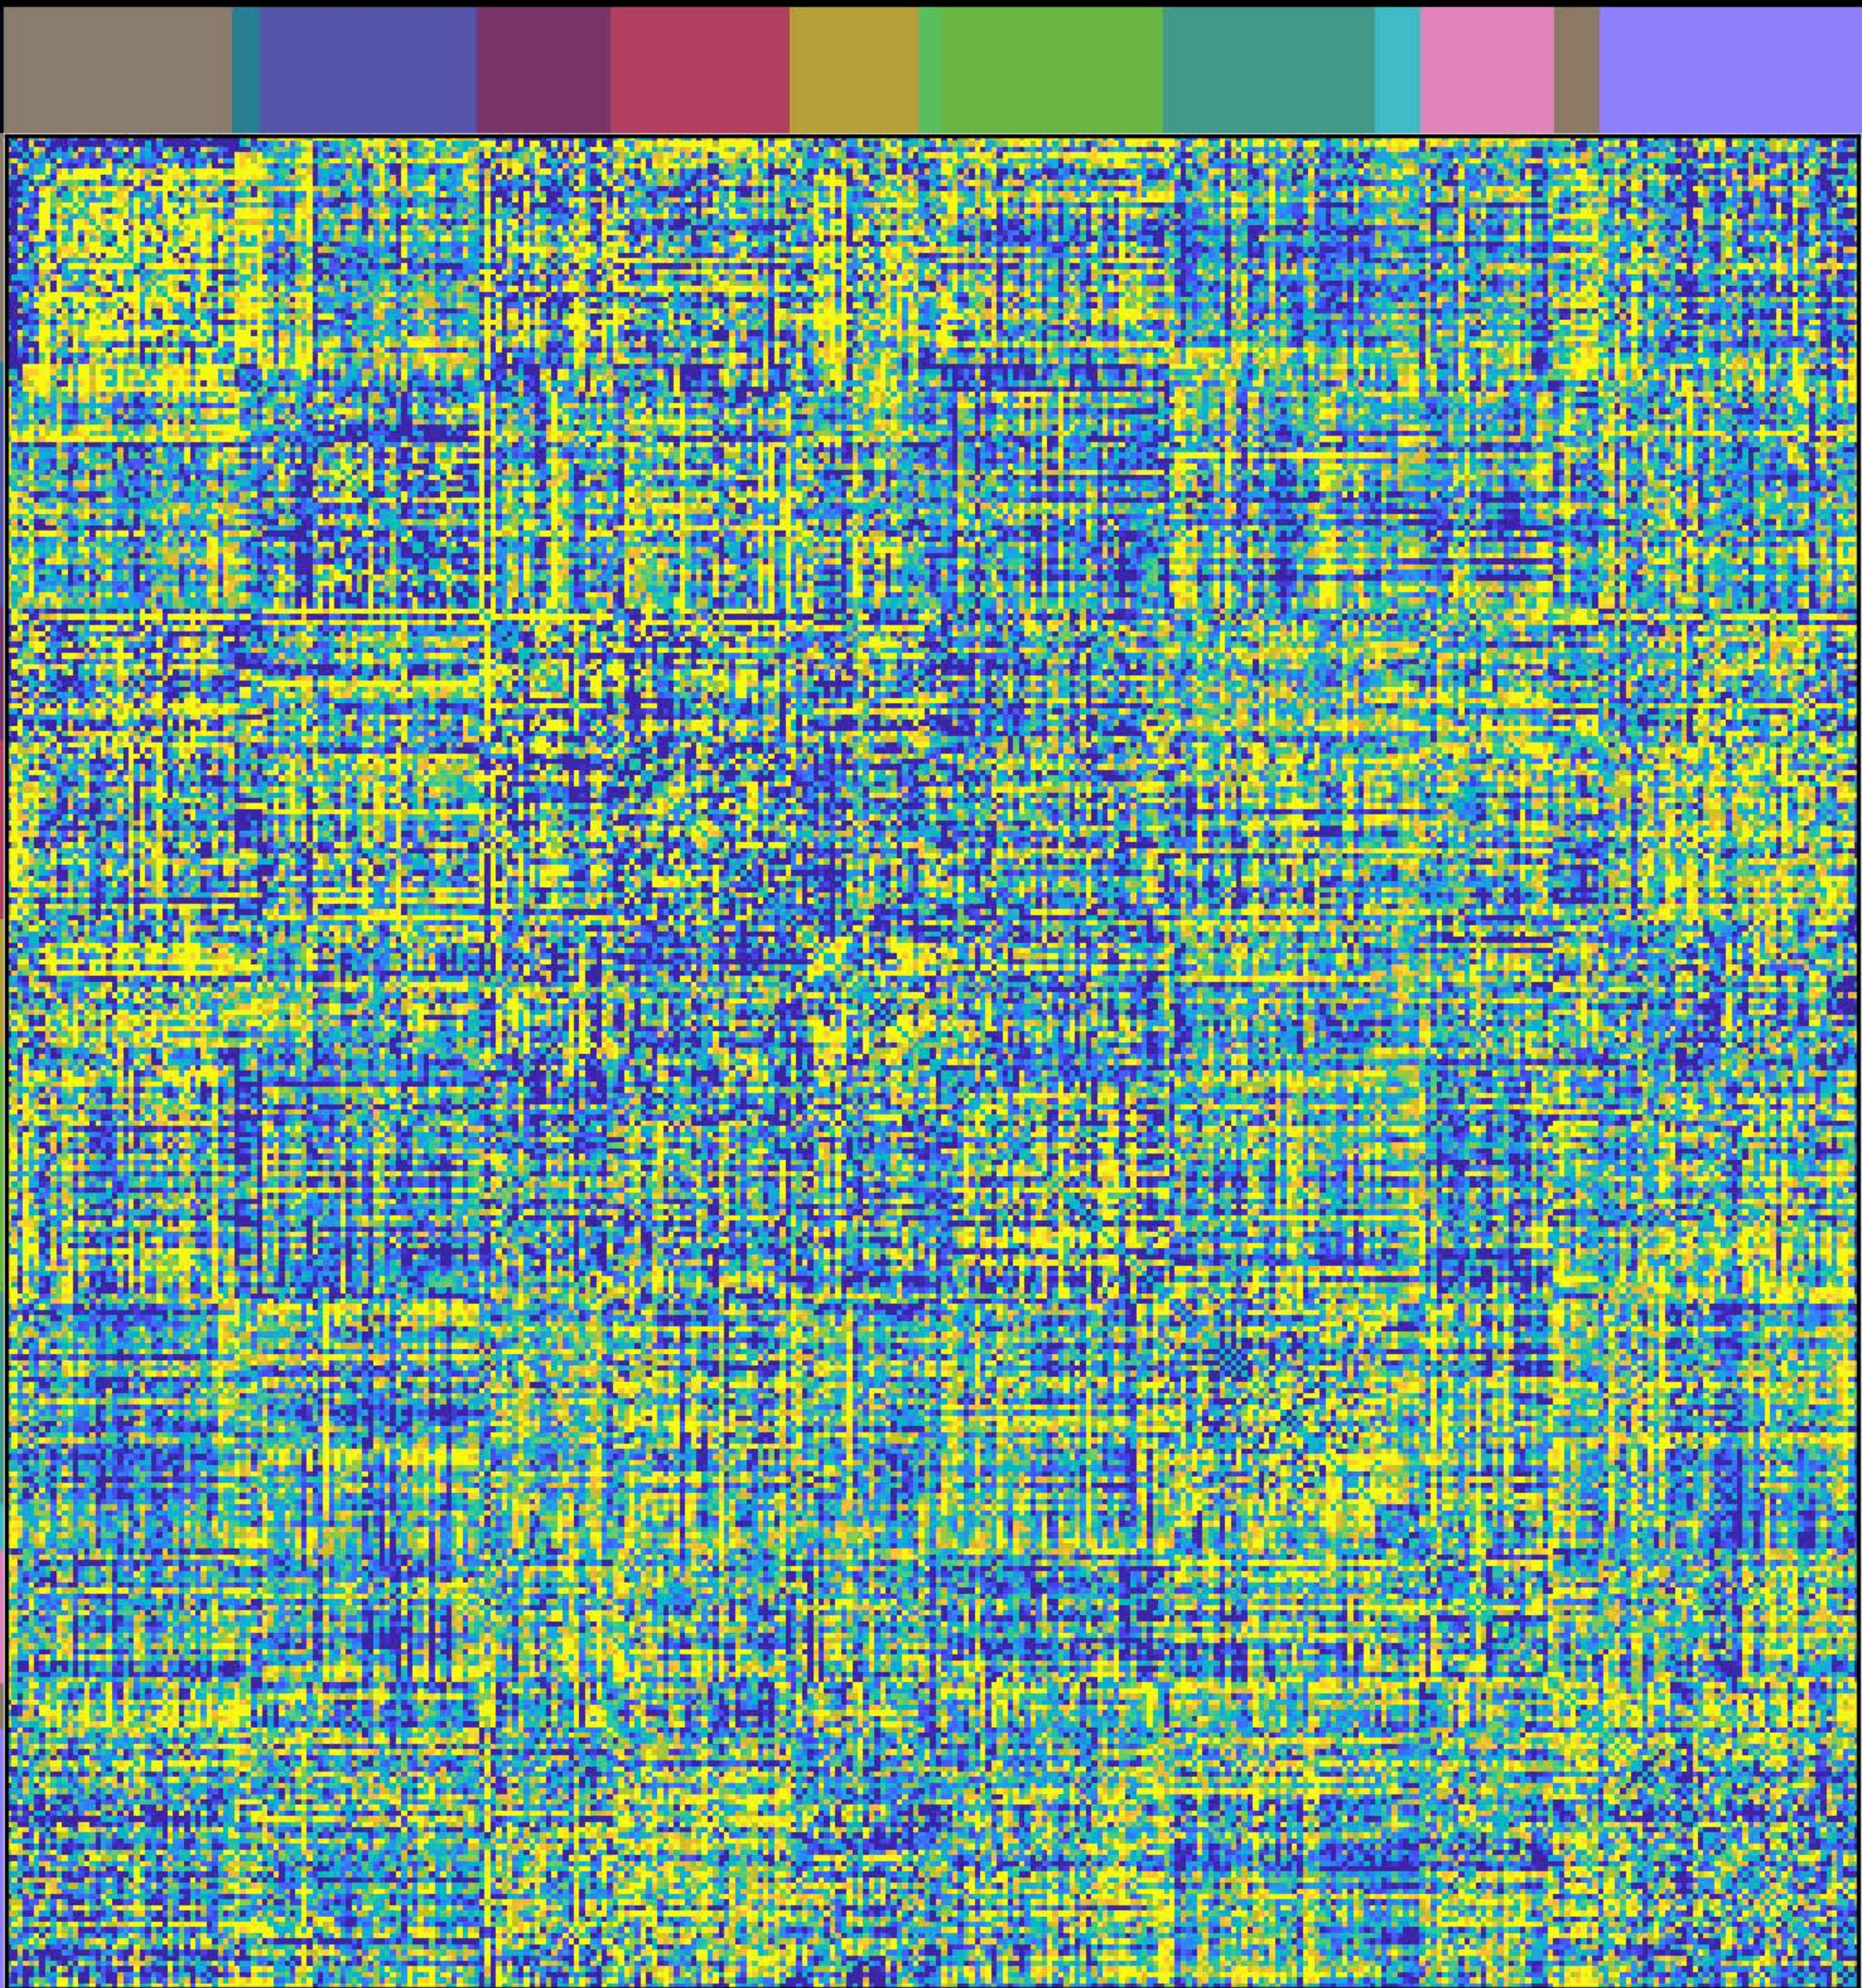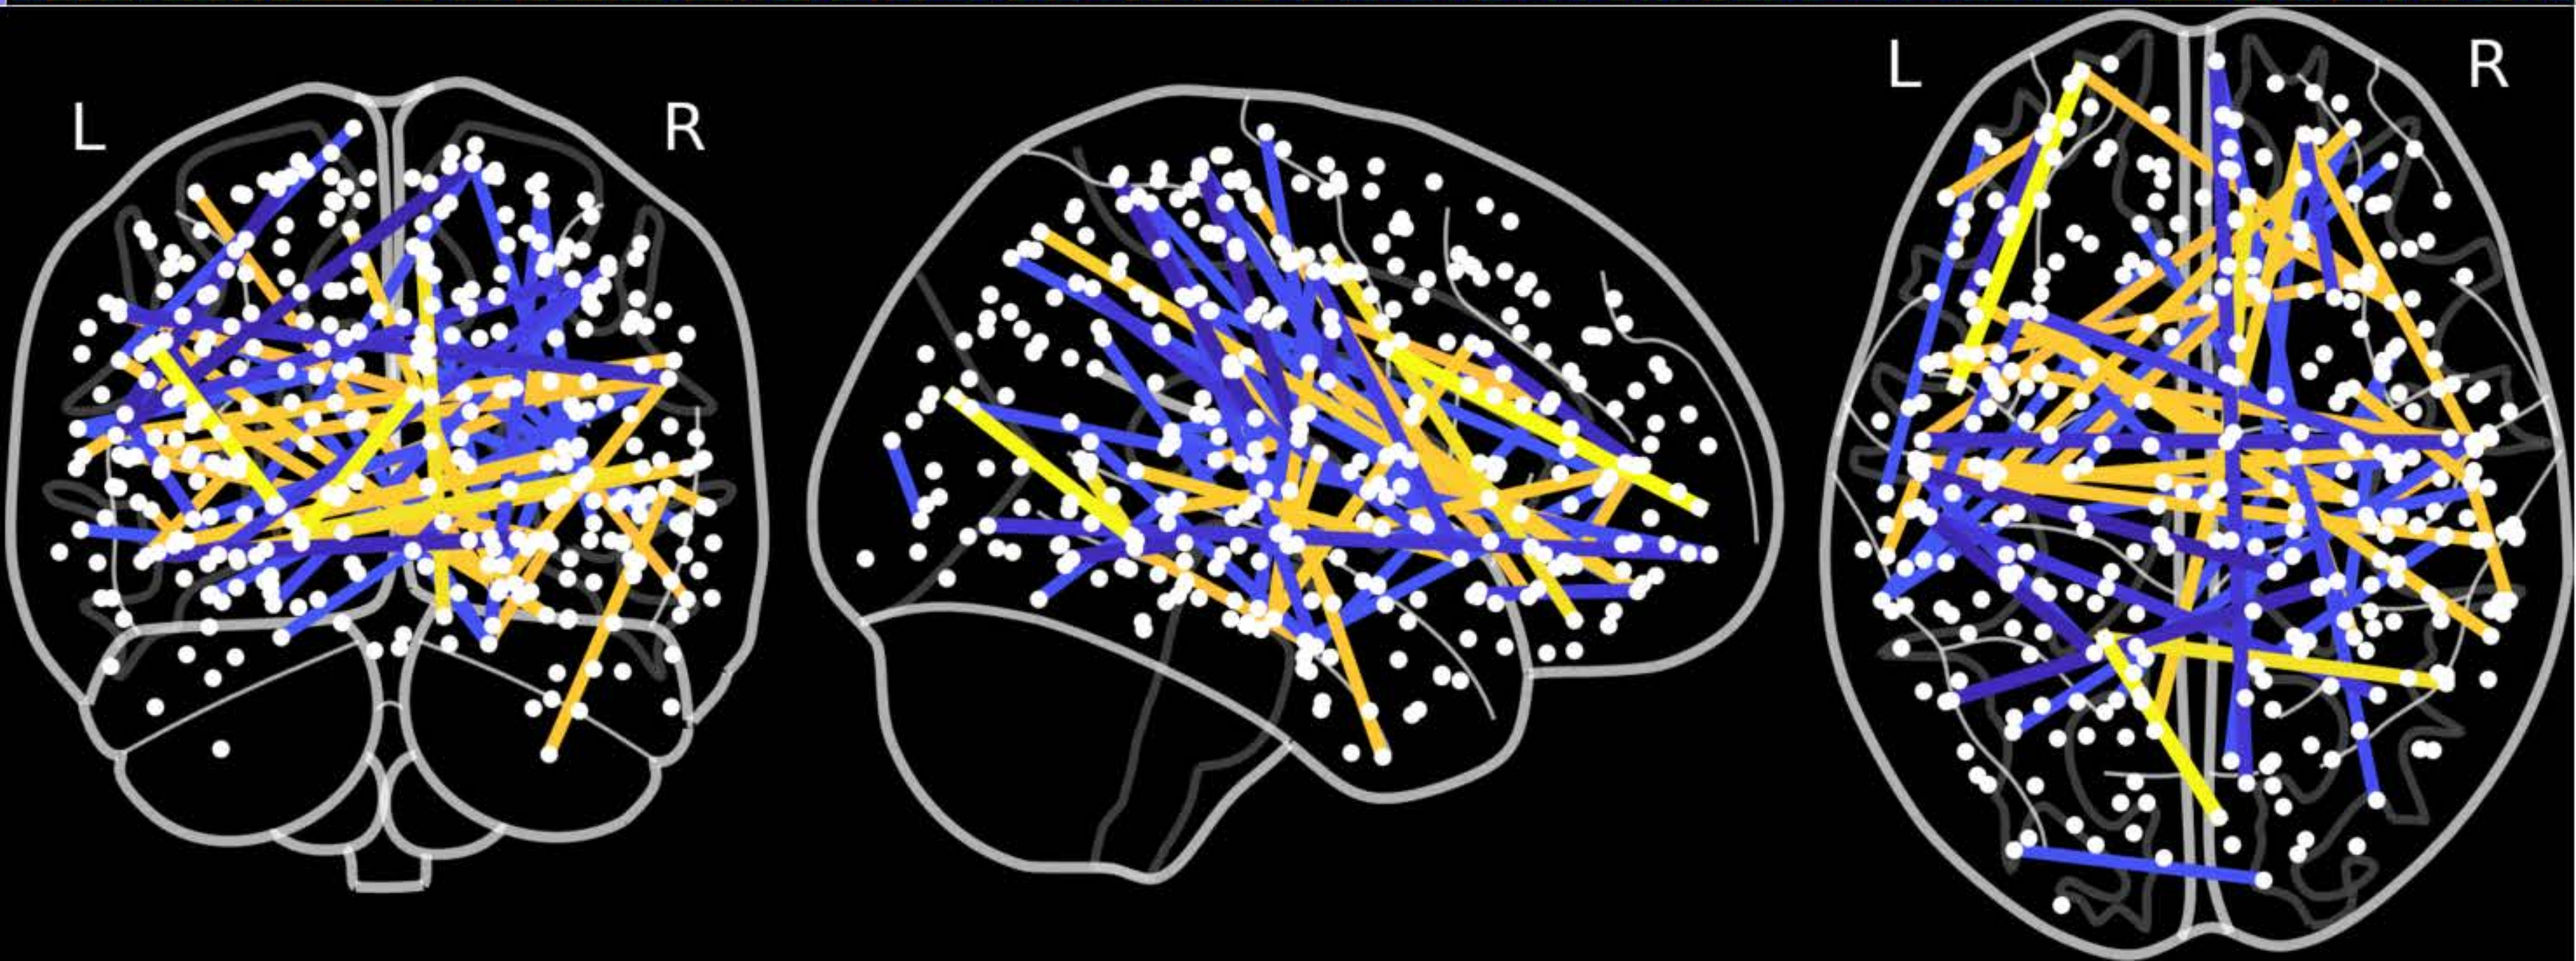



component\_82

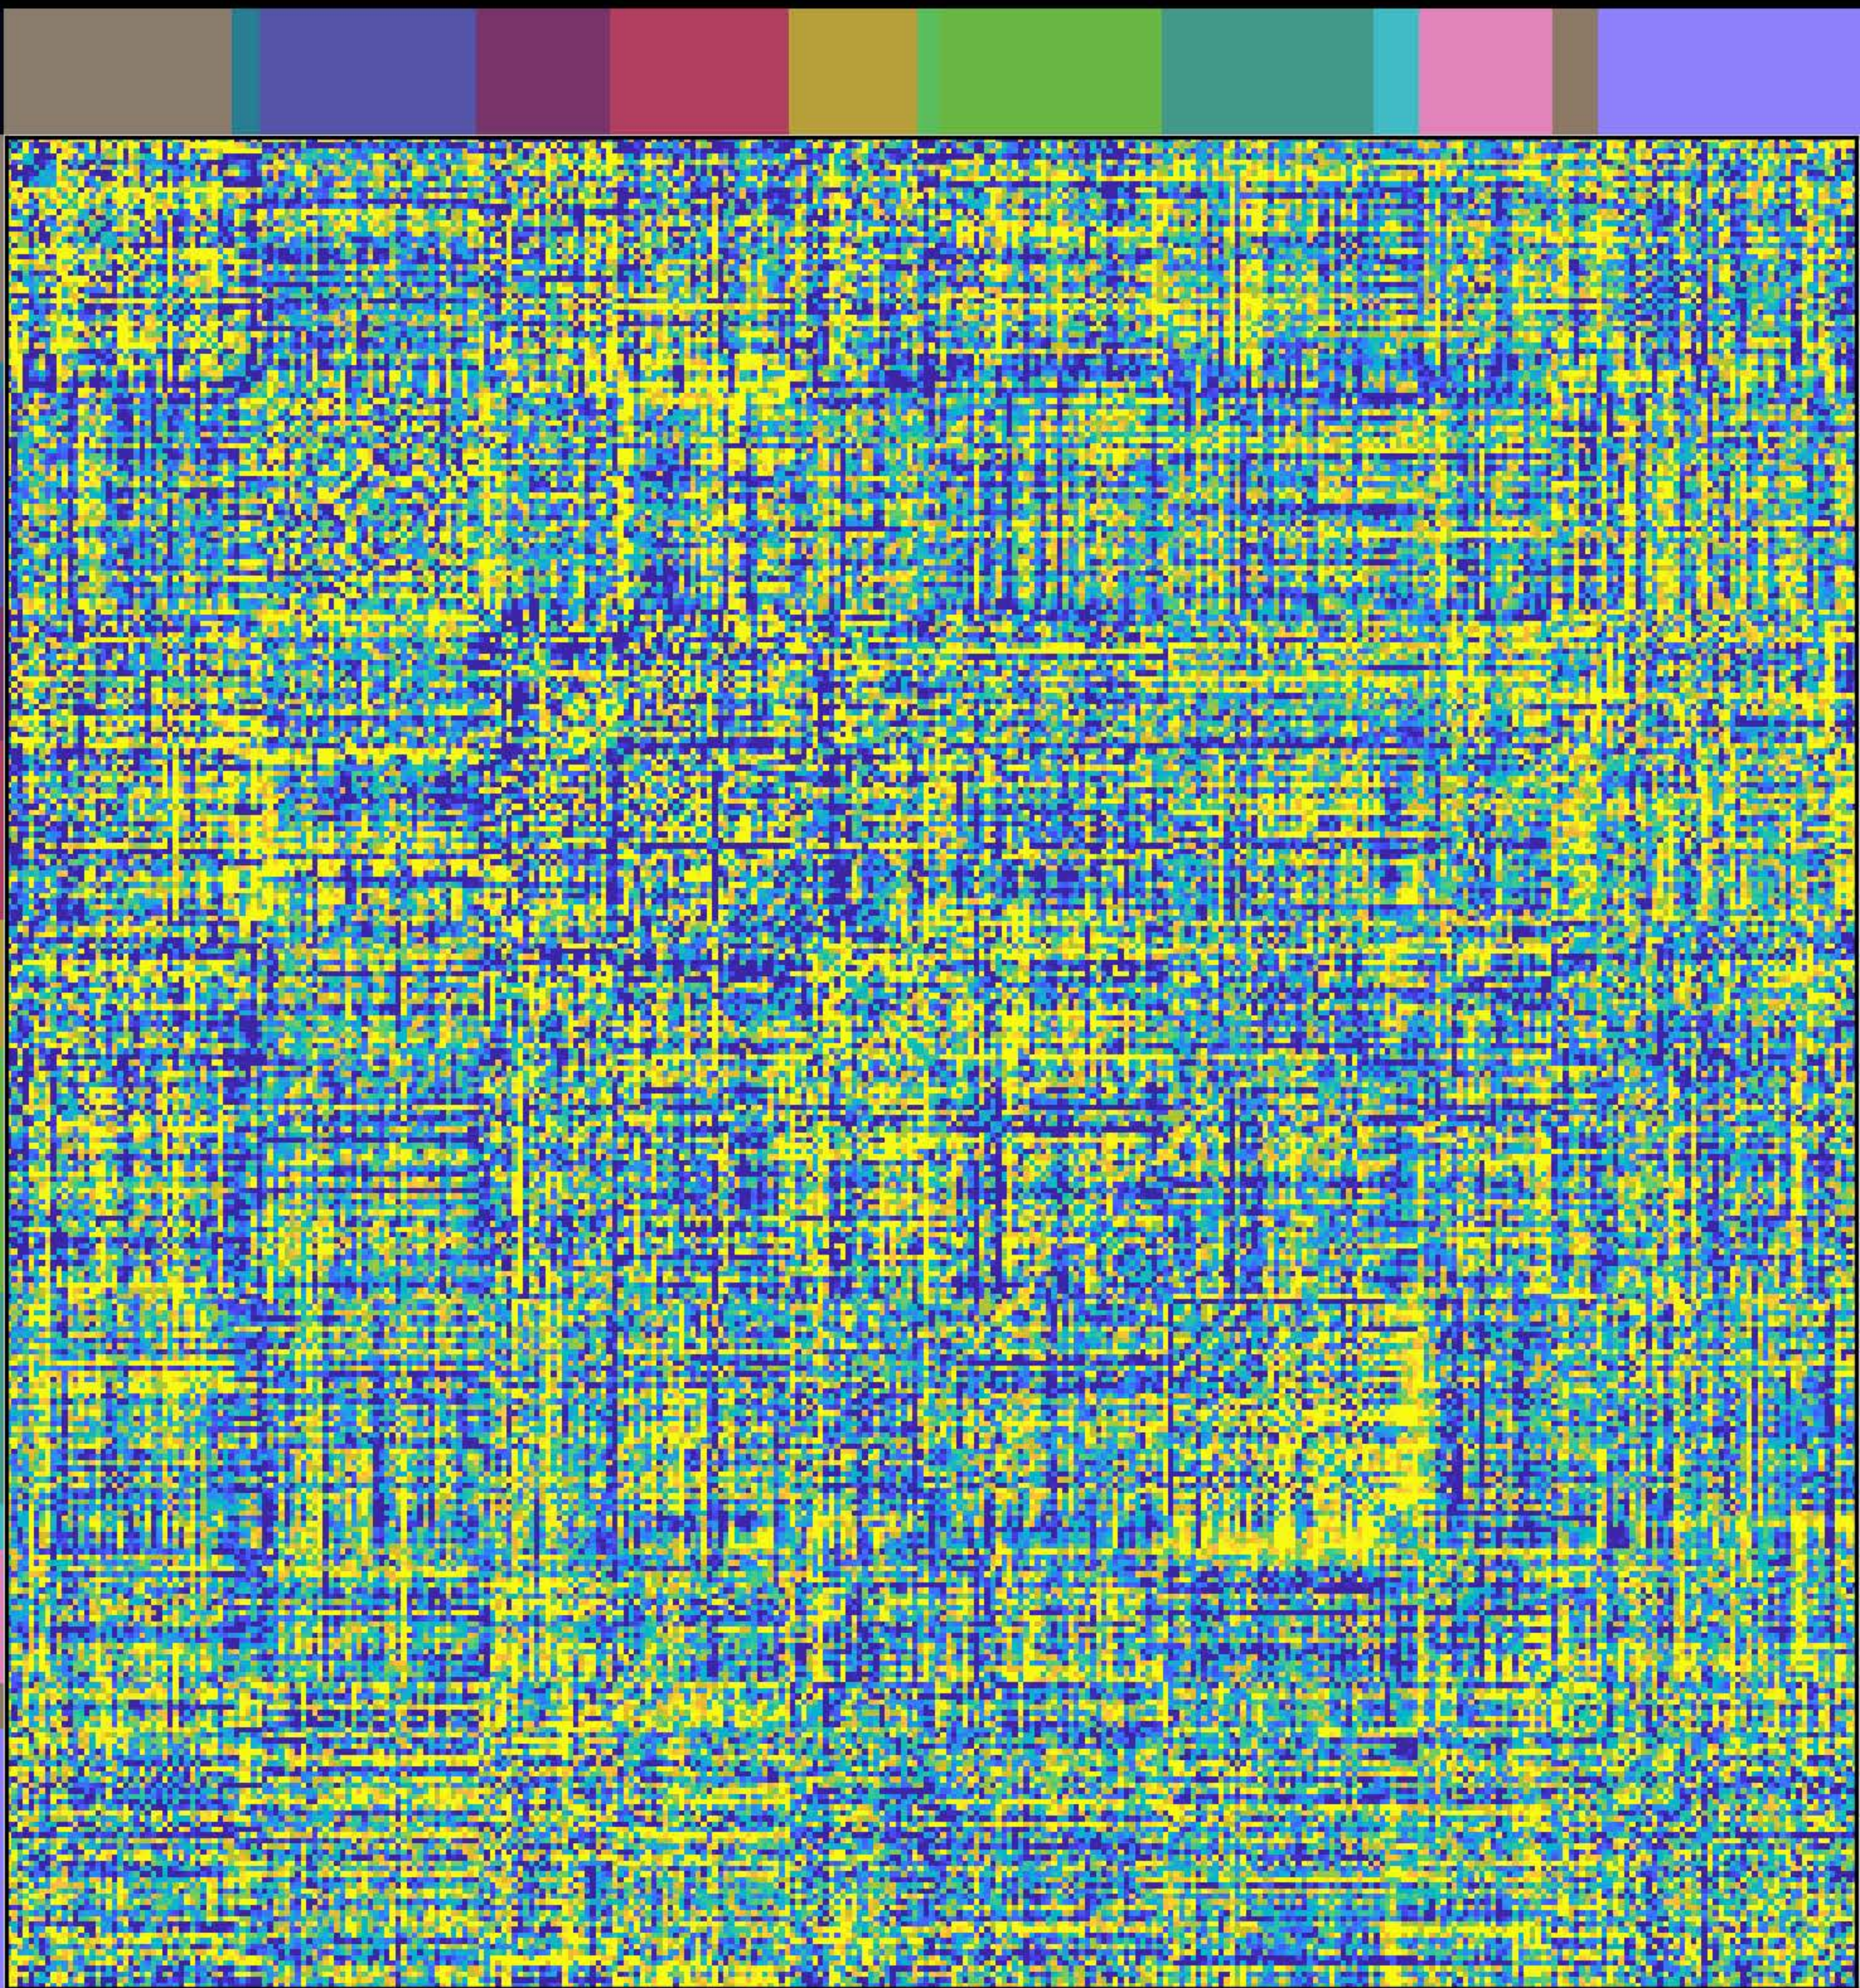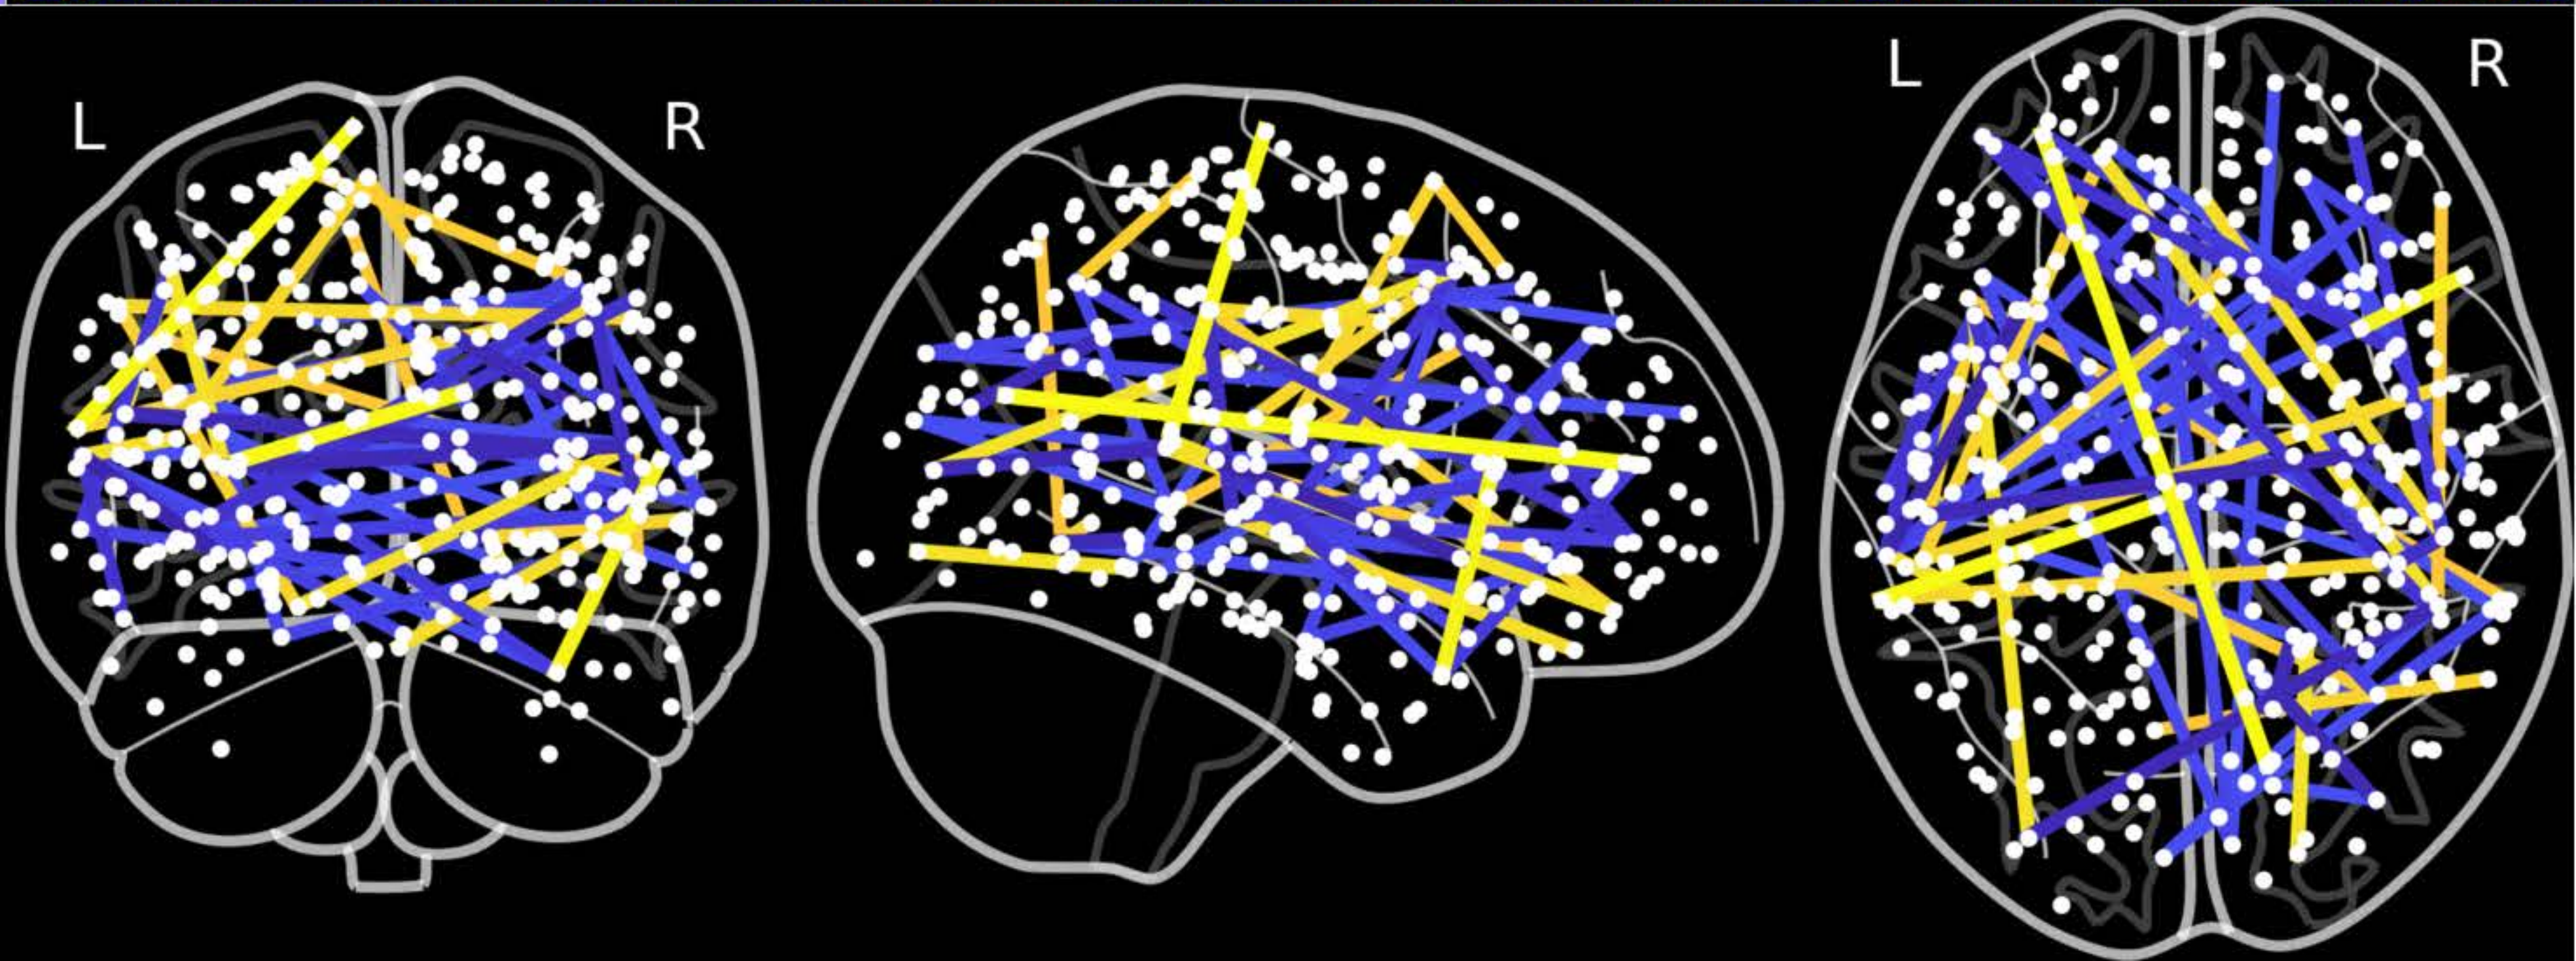



component\_83

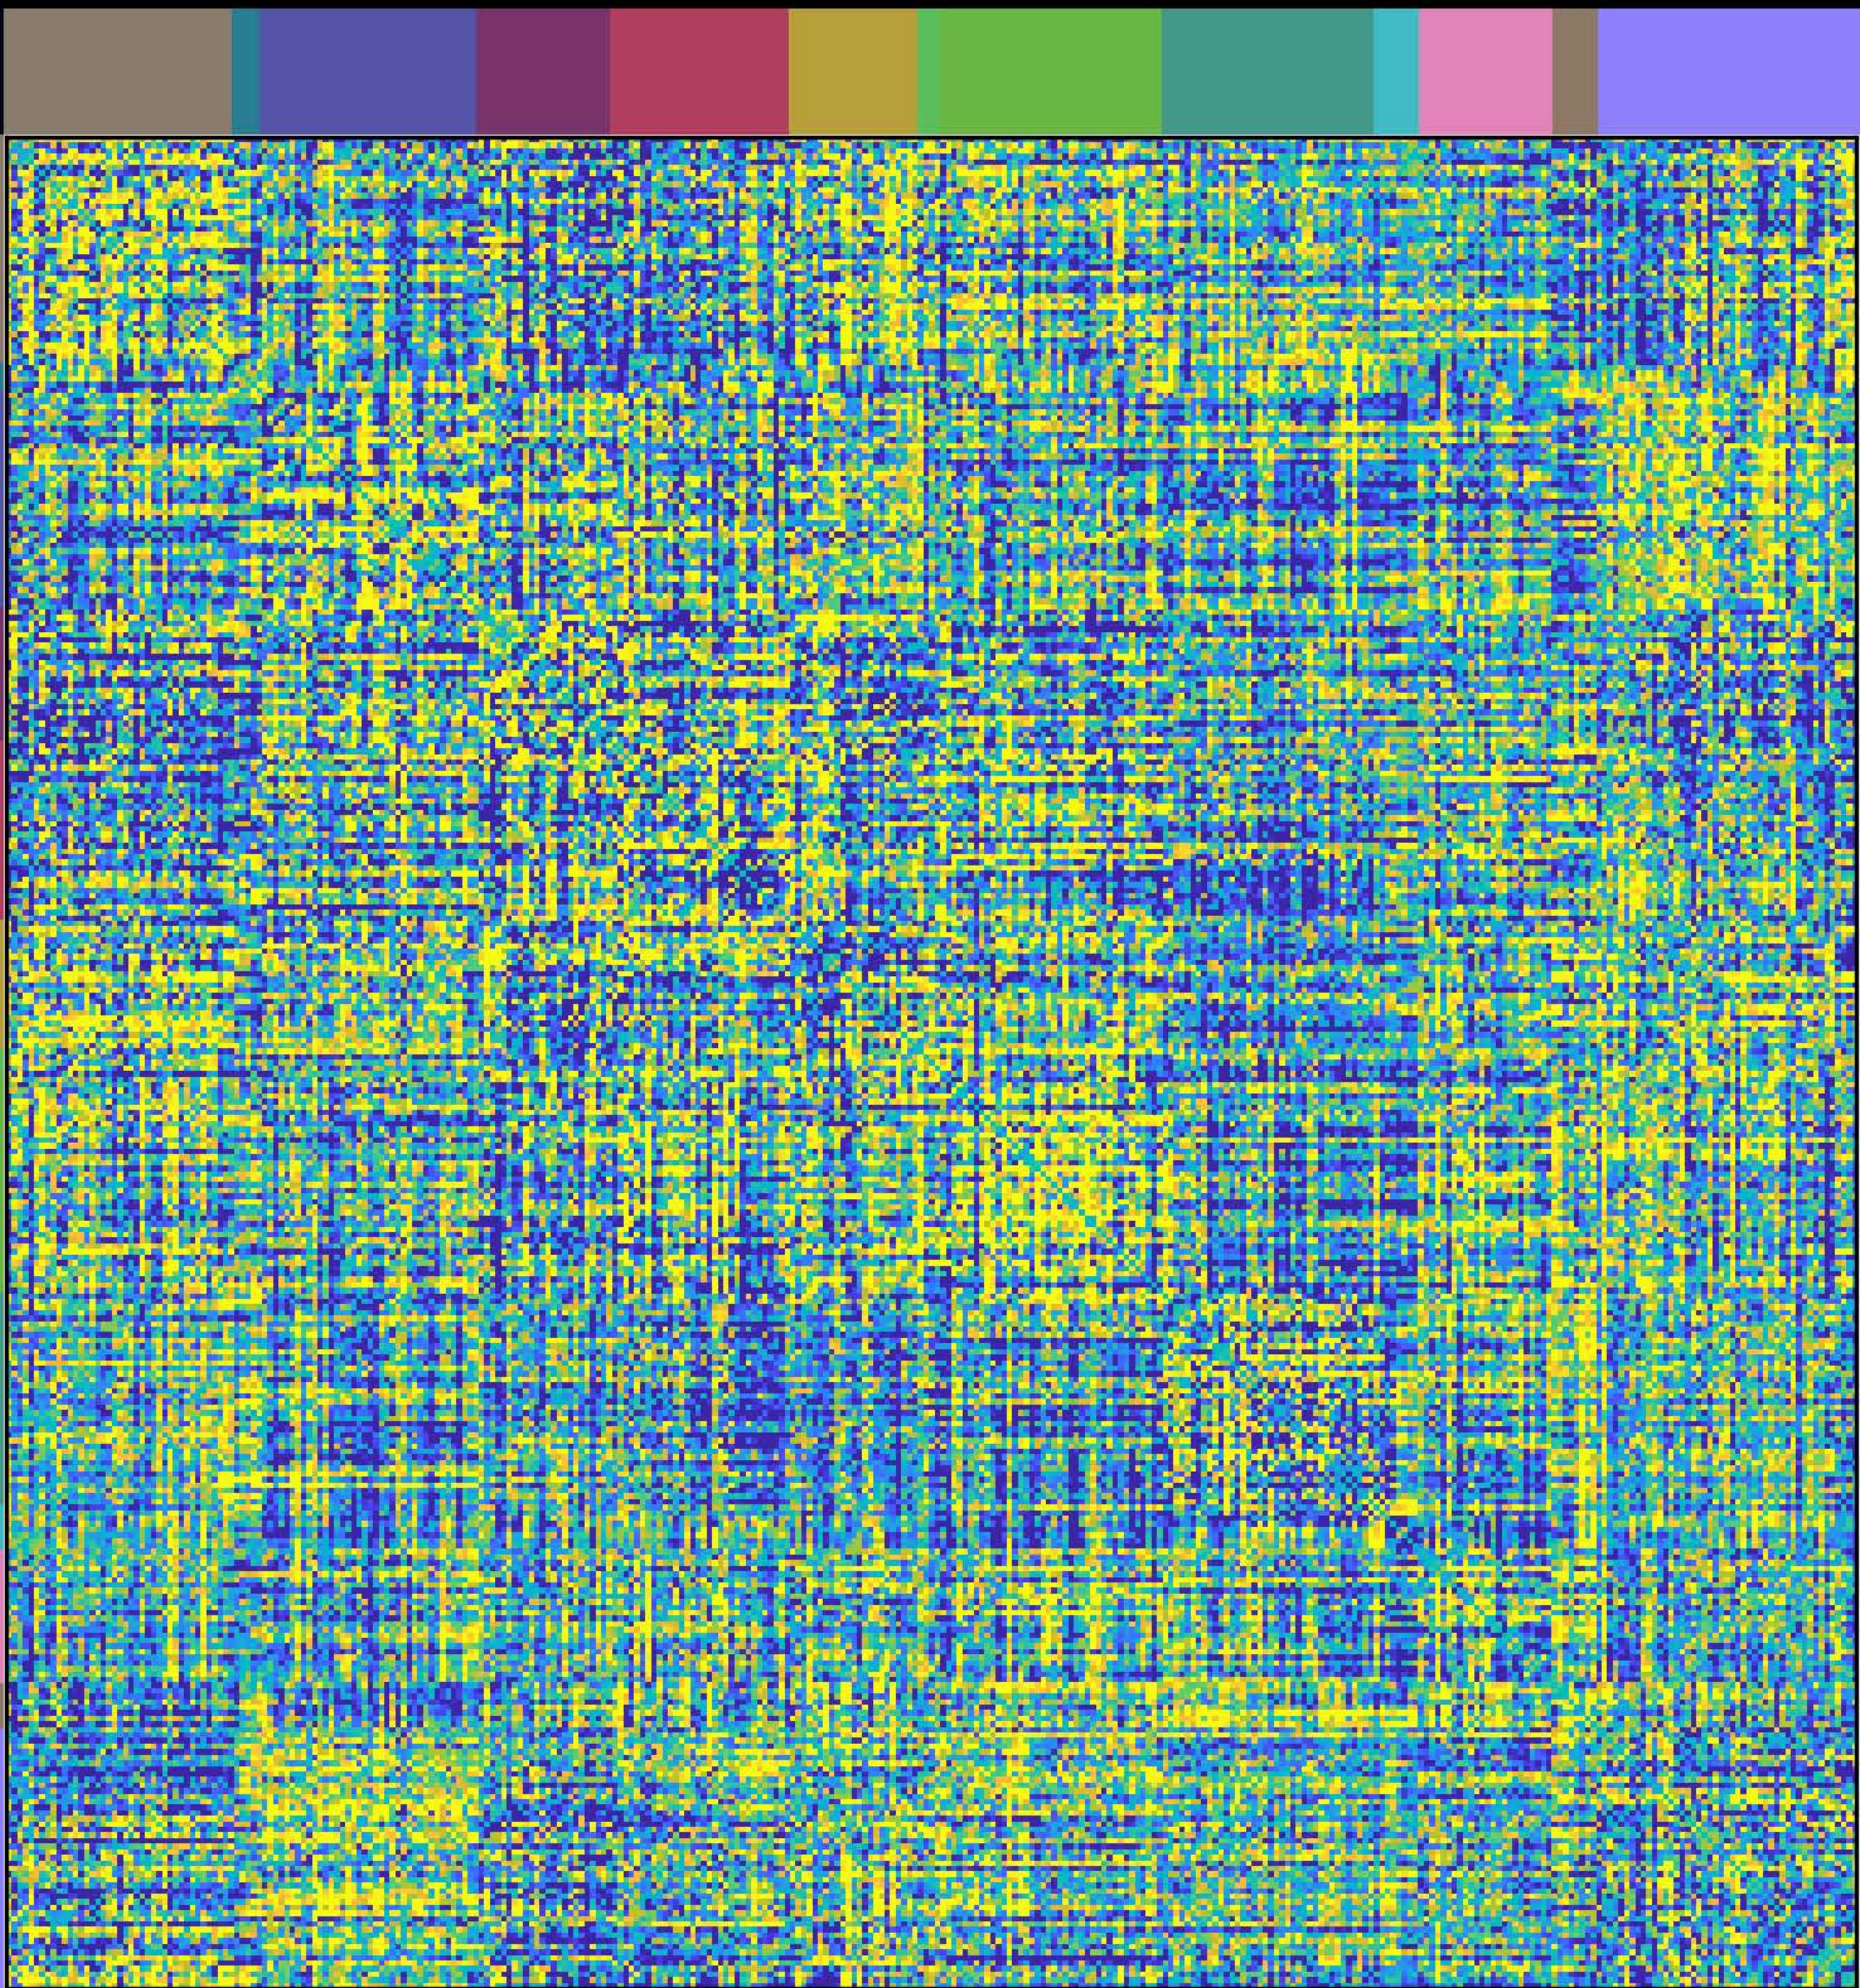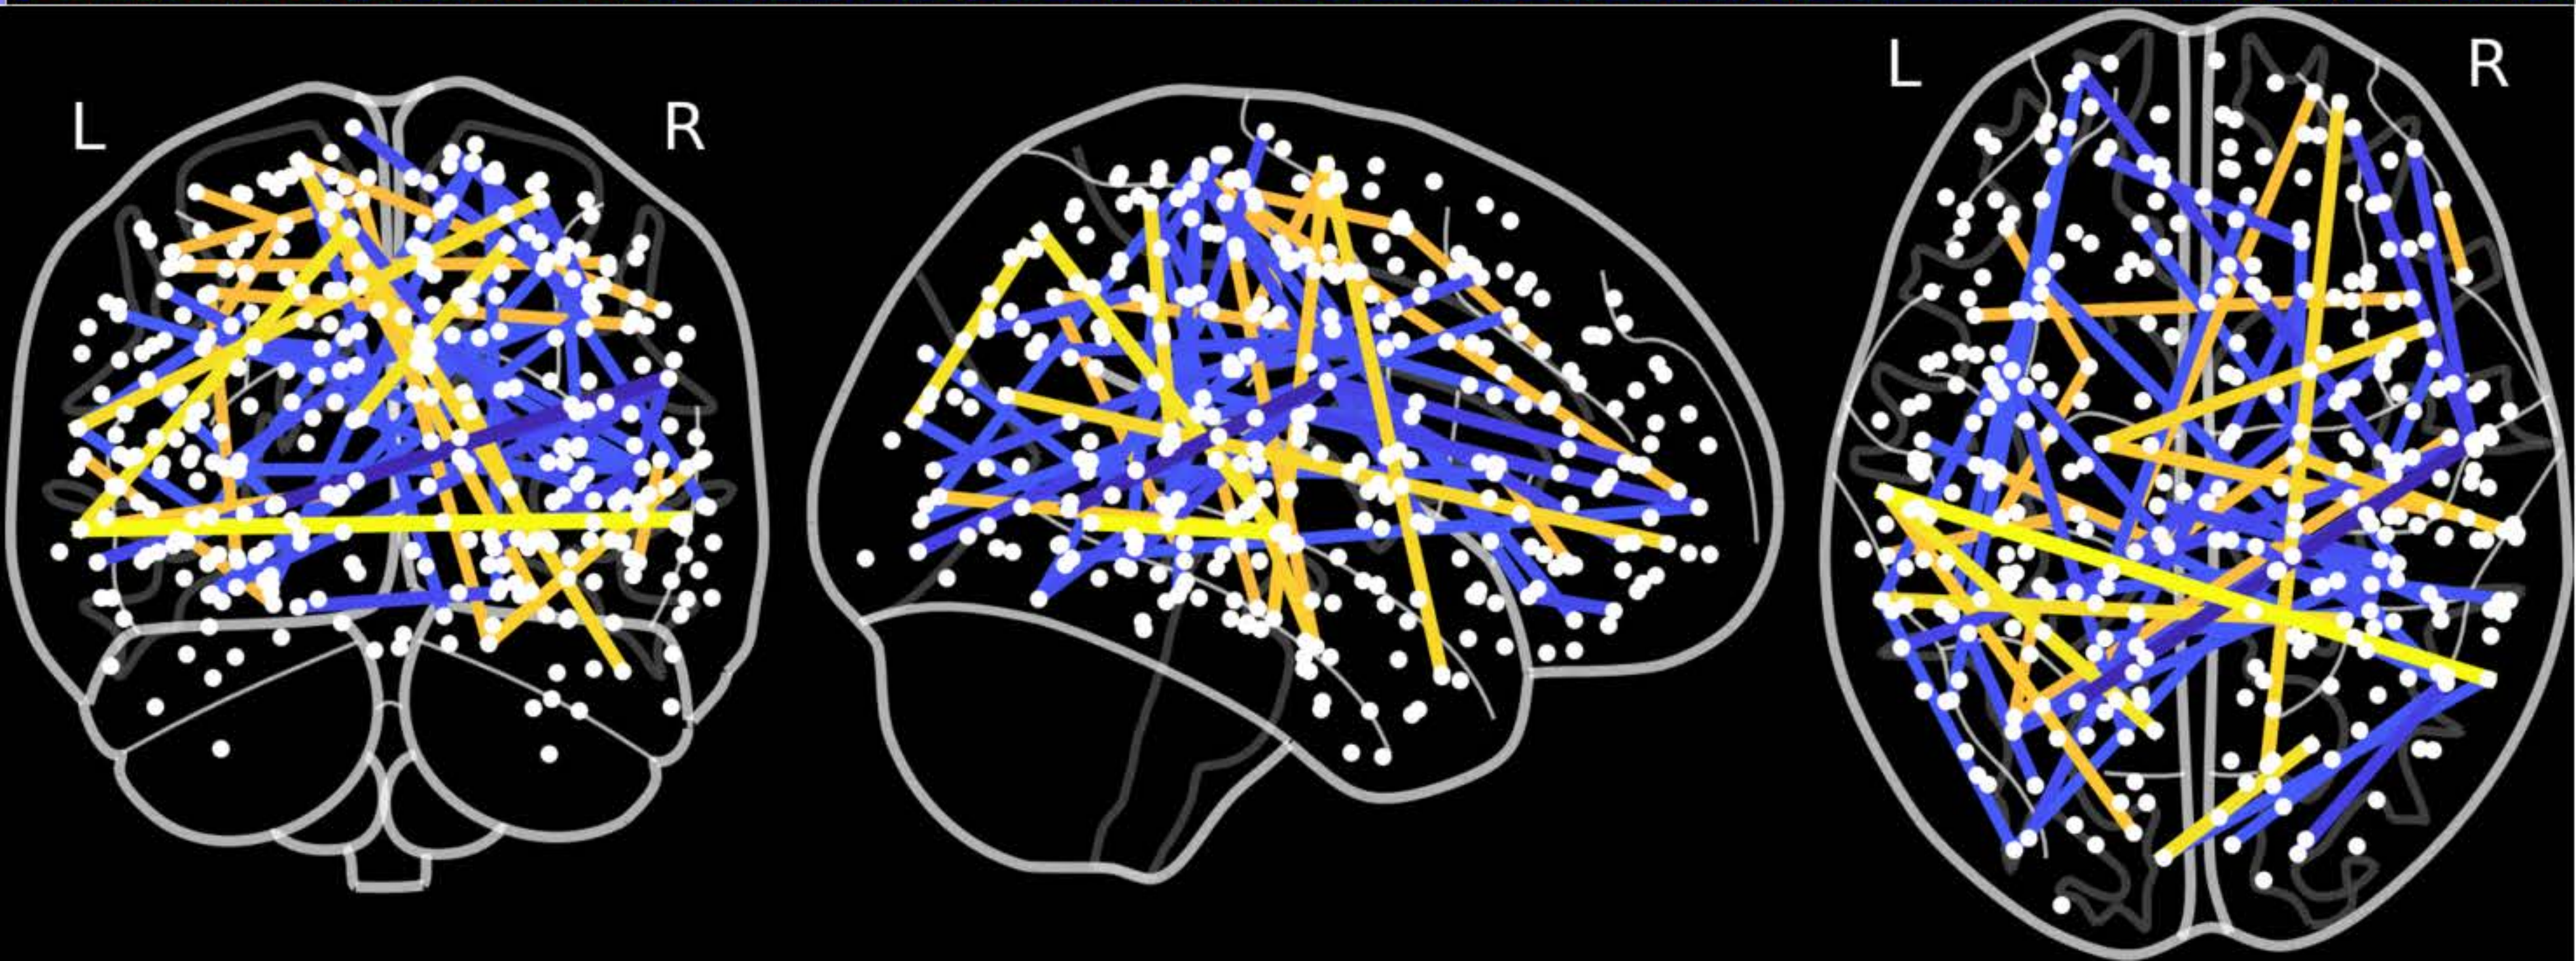



component\_84

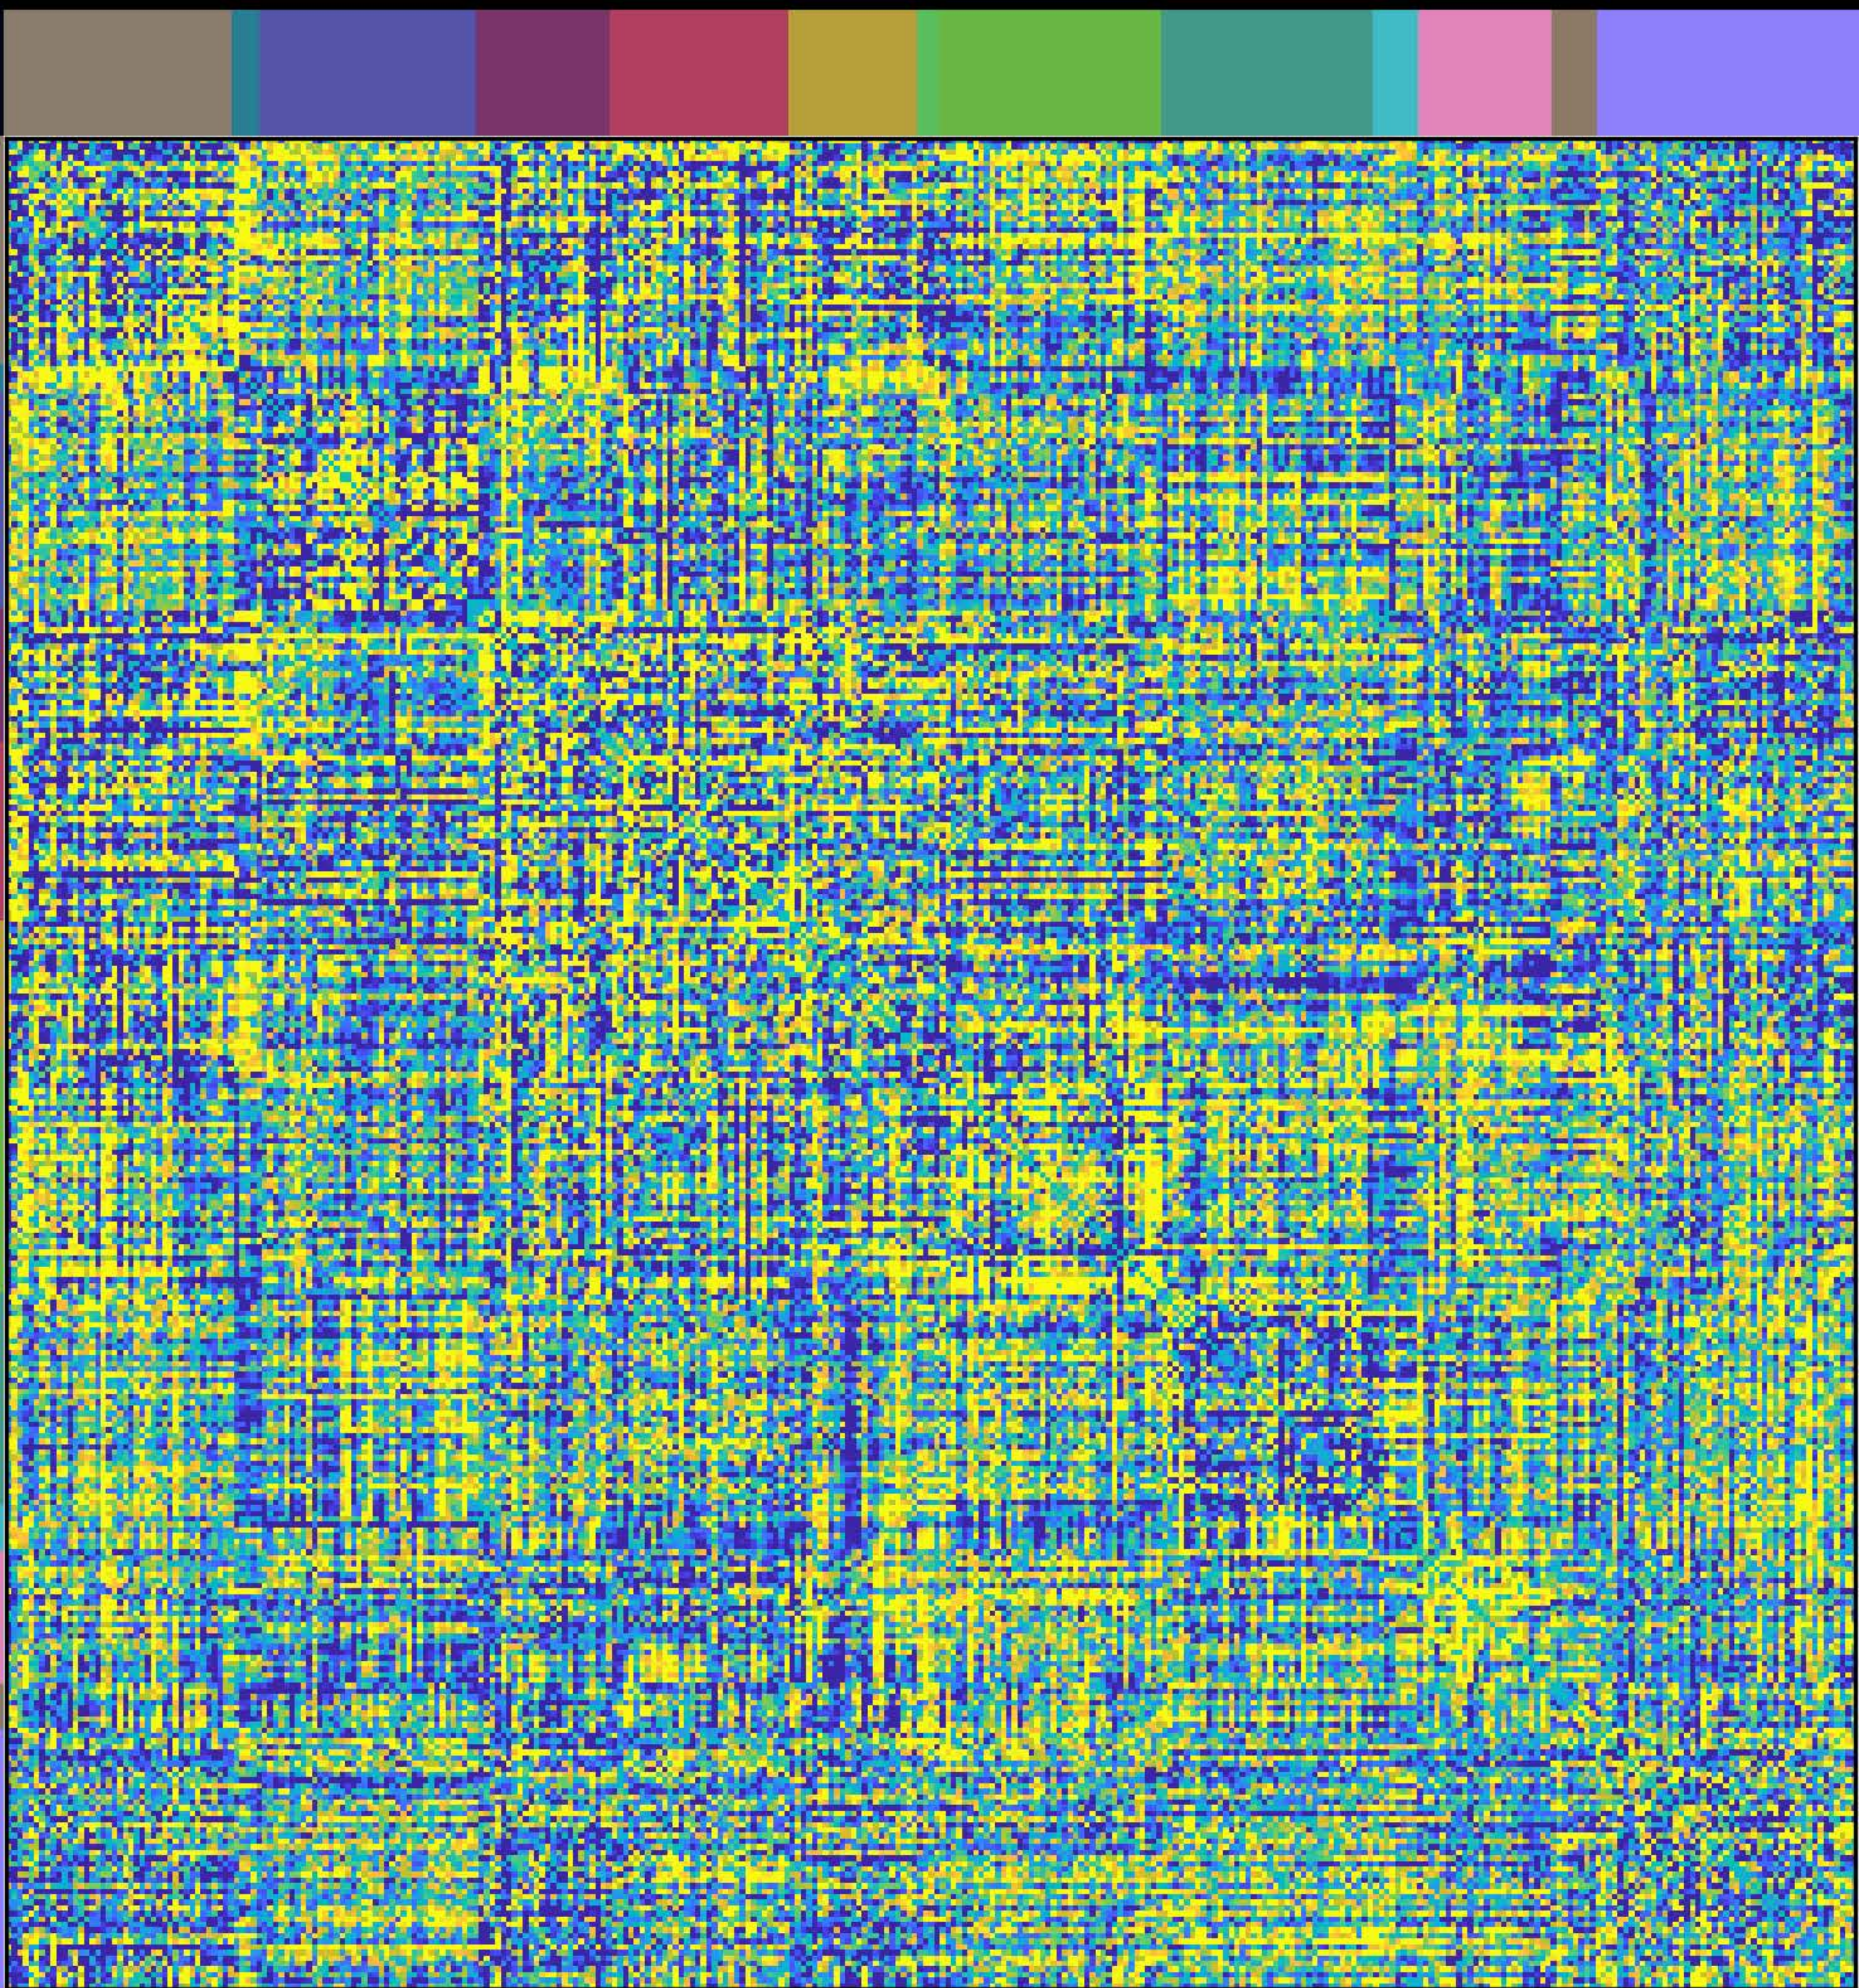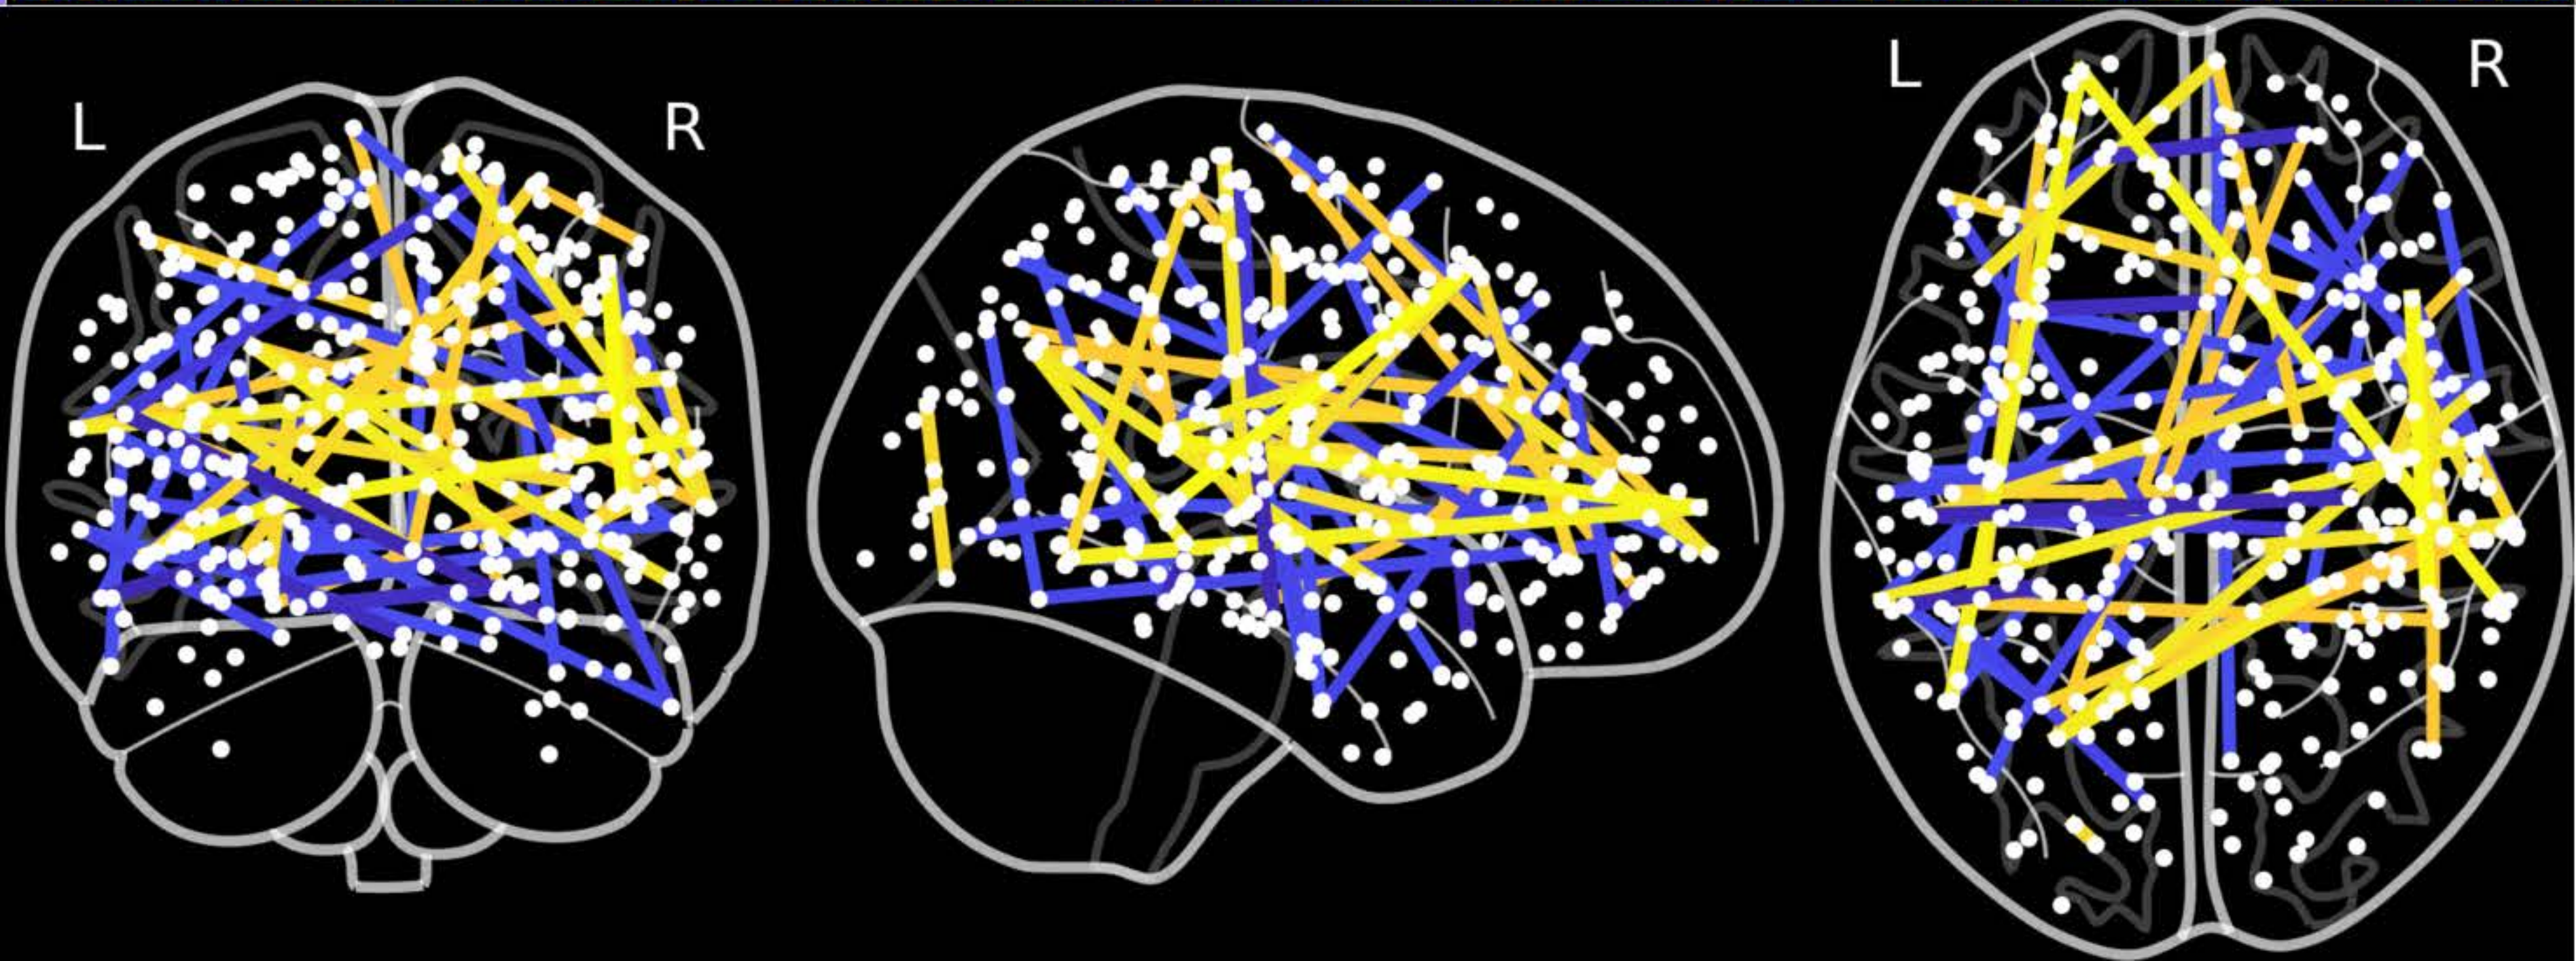



component\_85

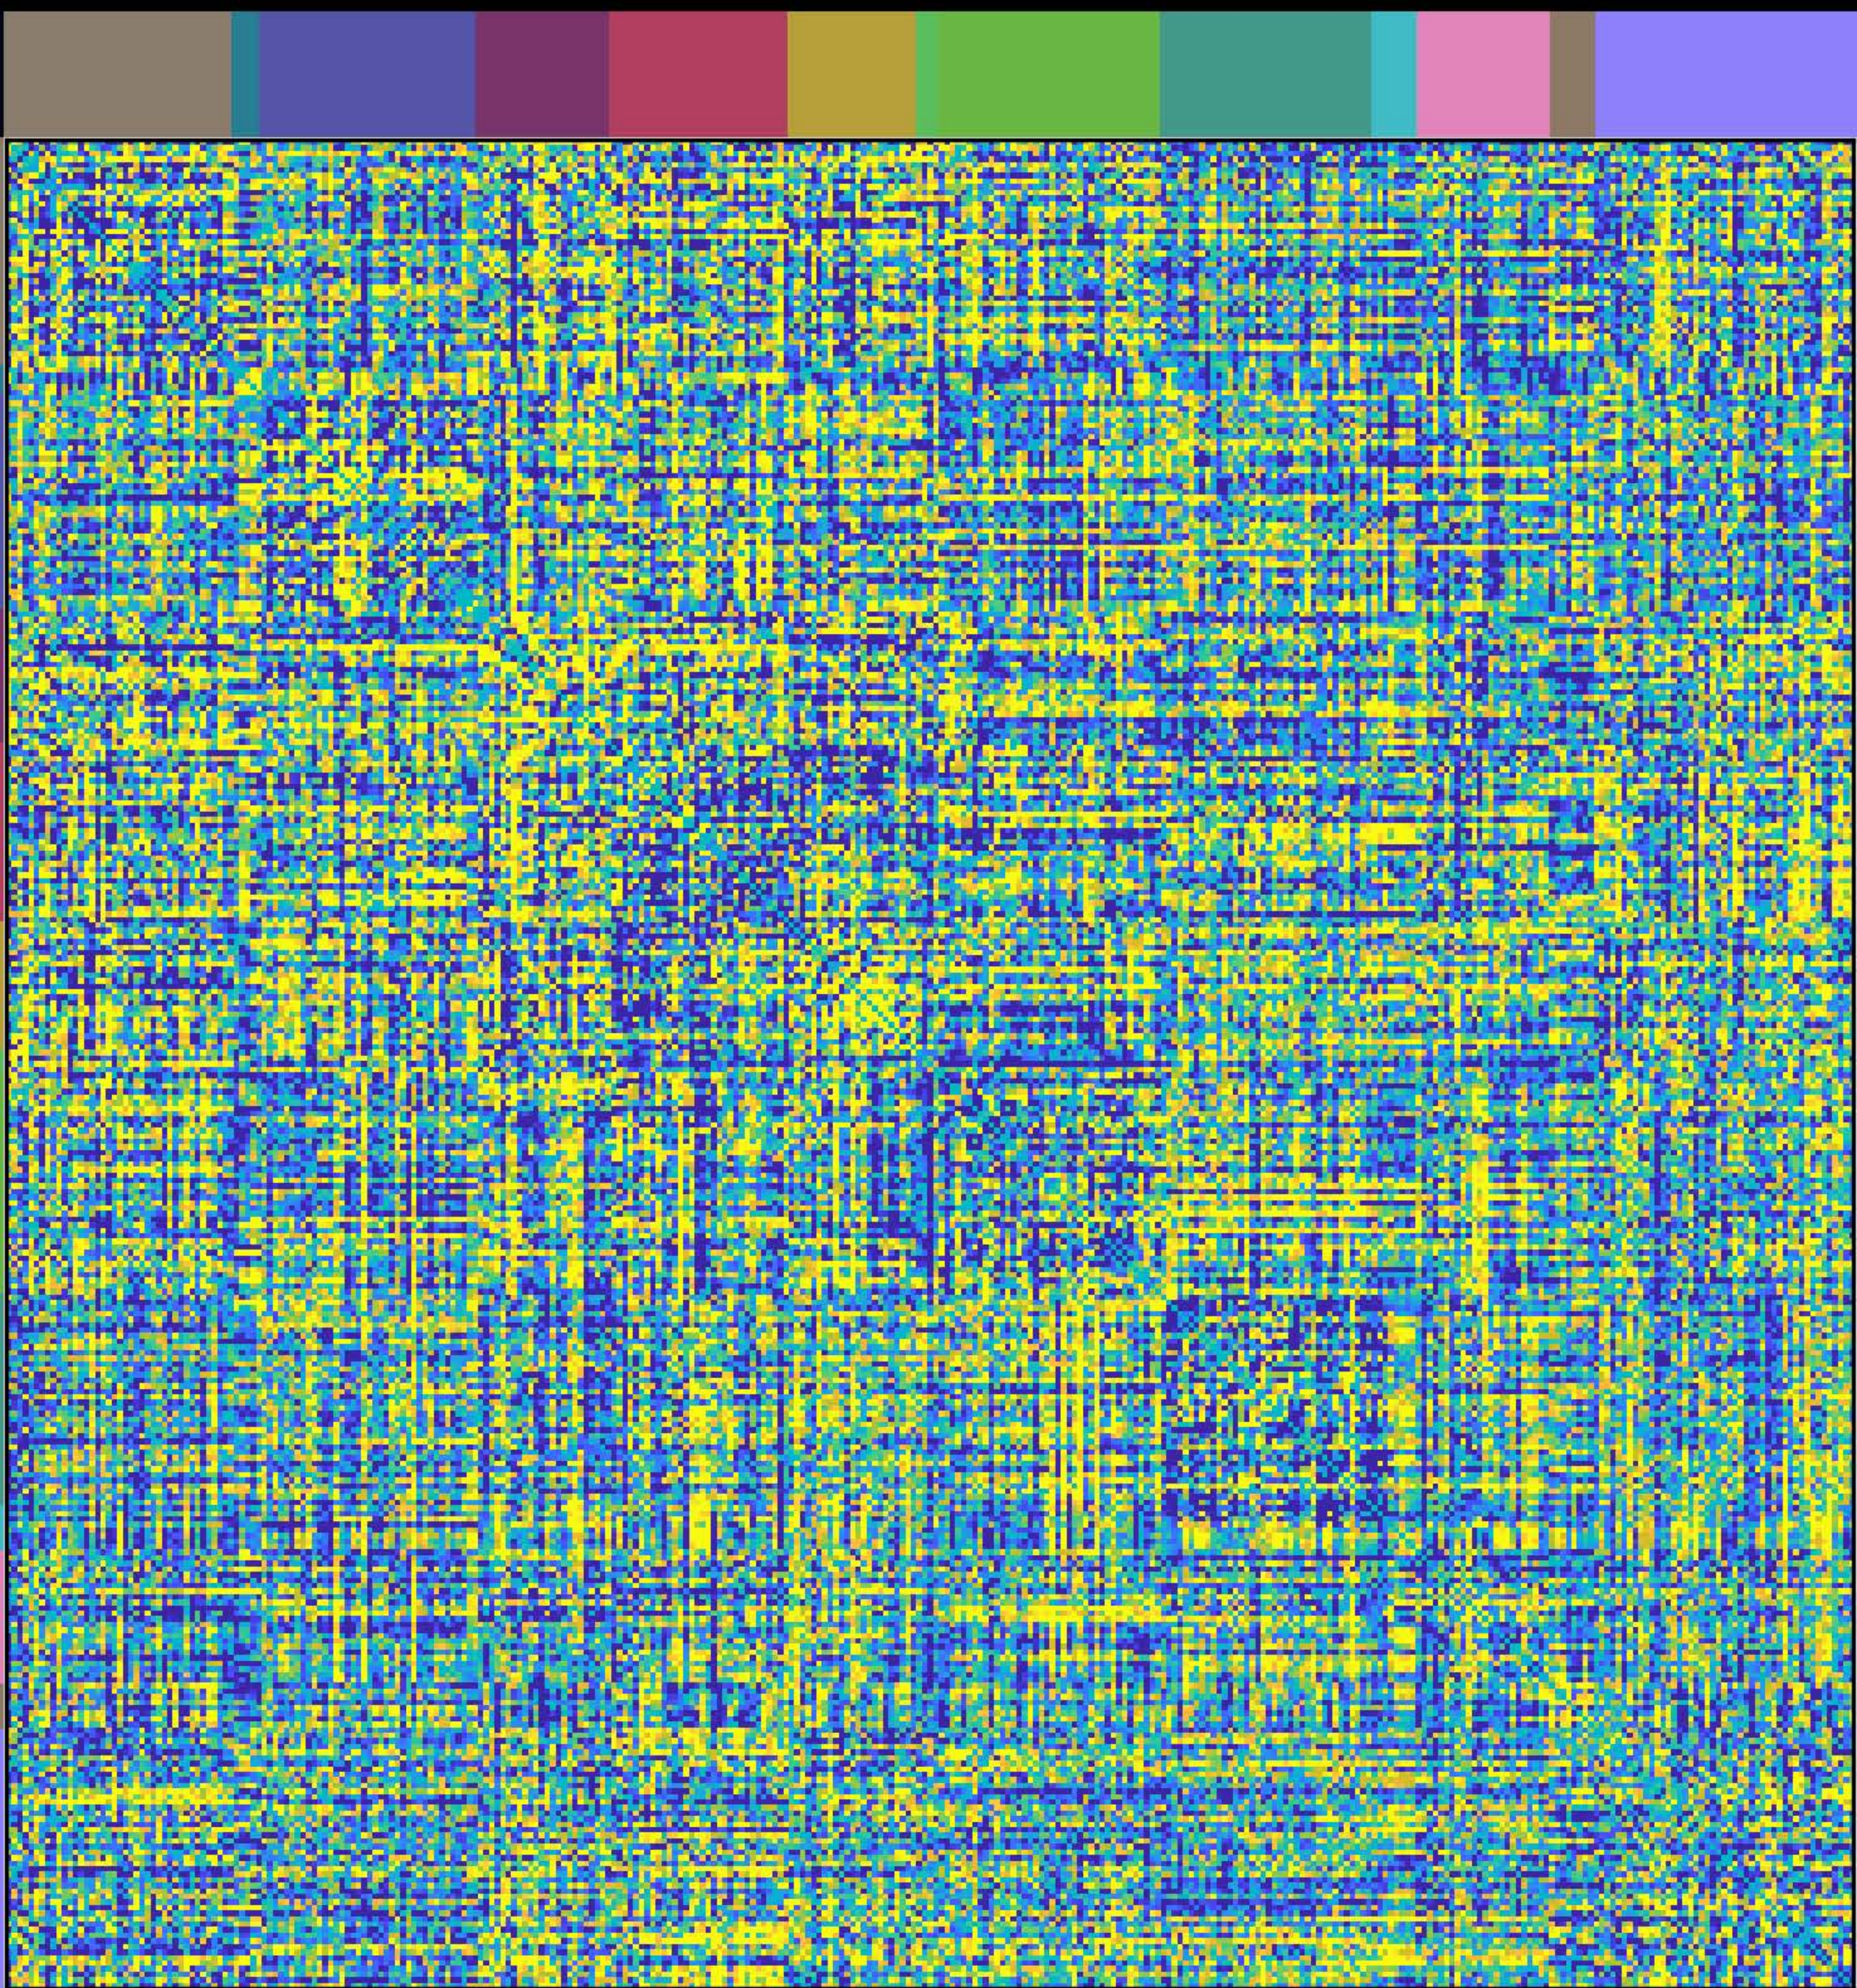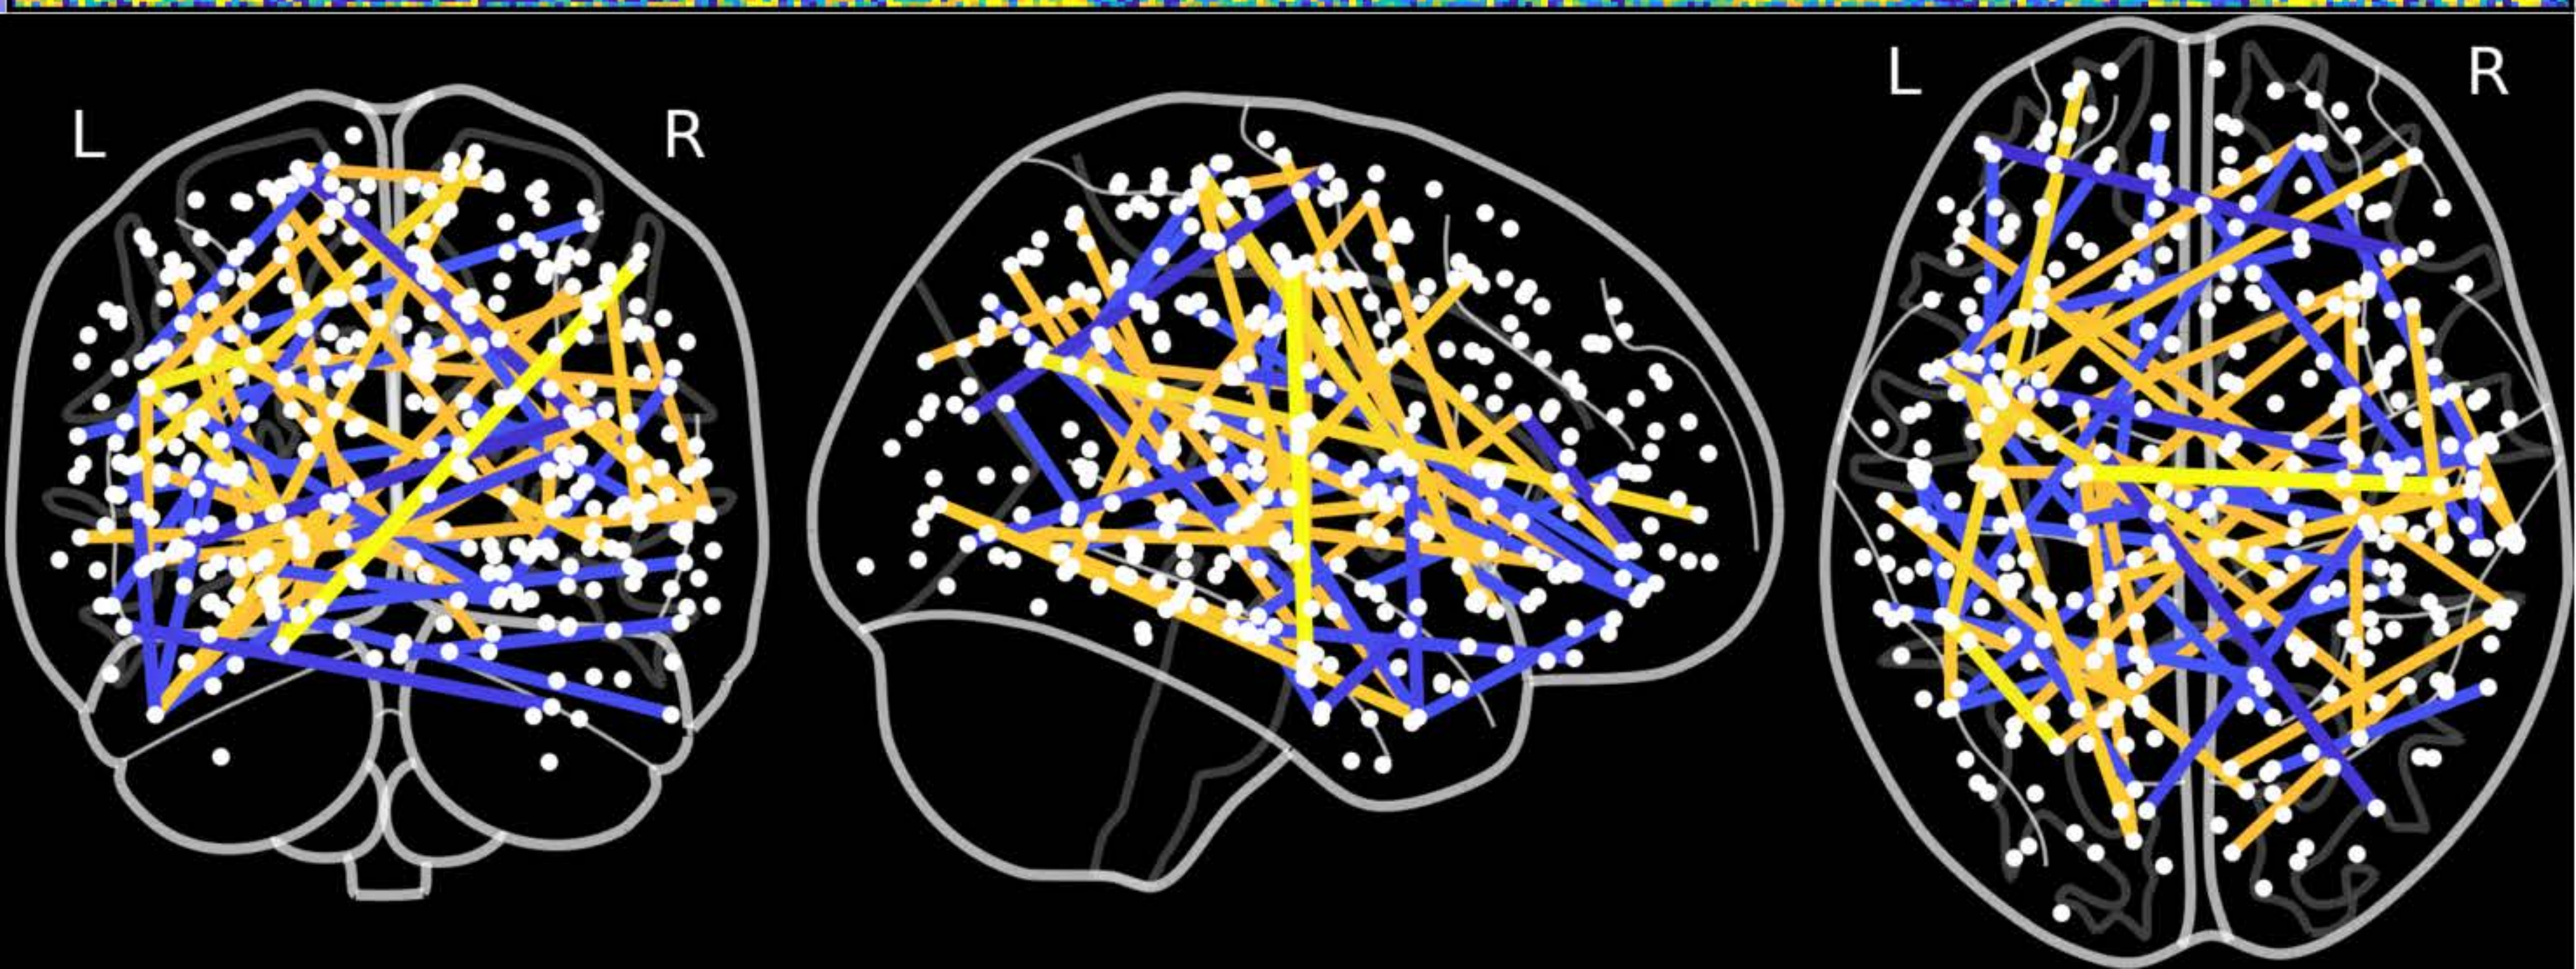



component\_86

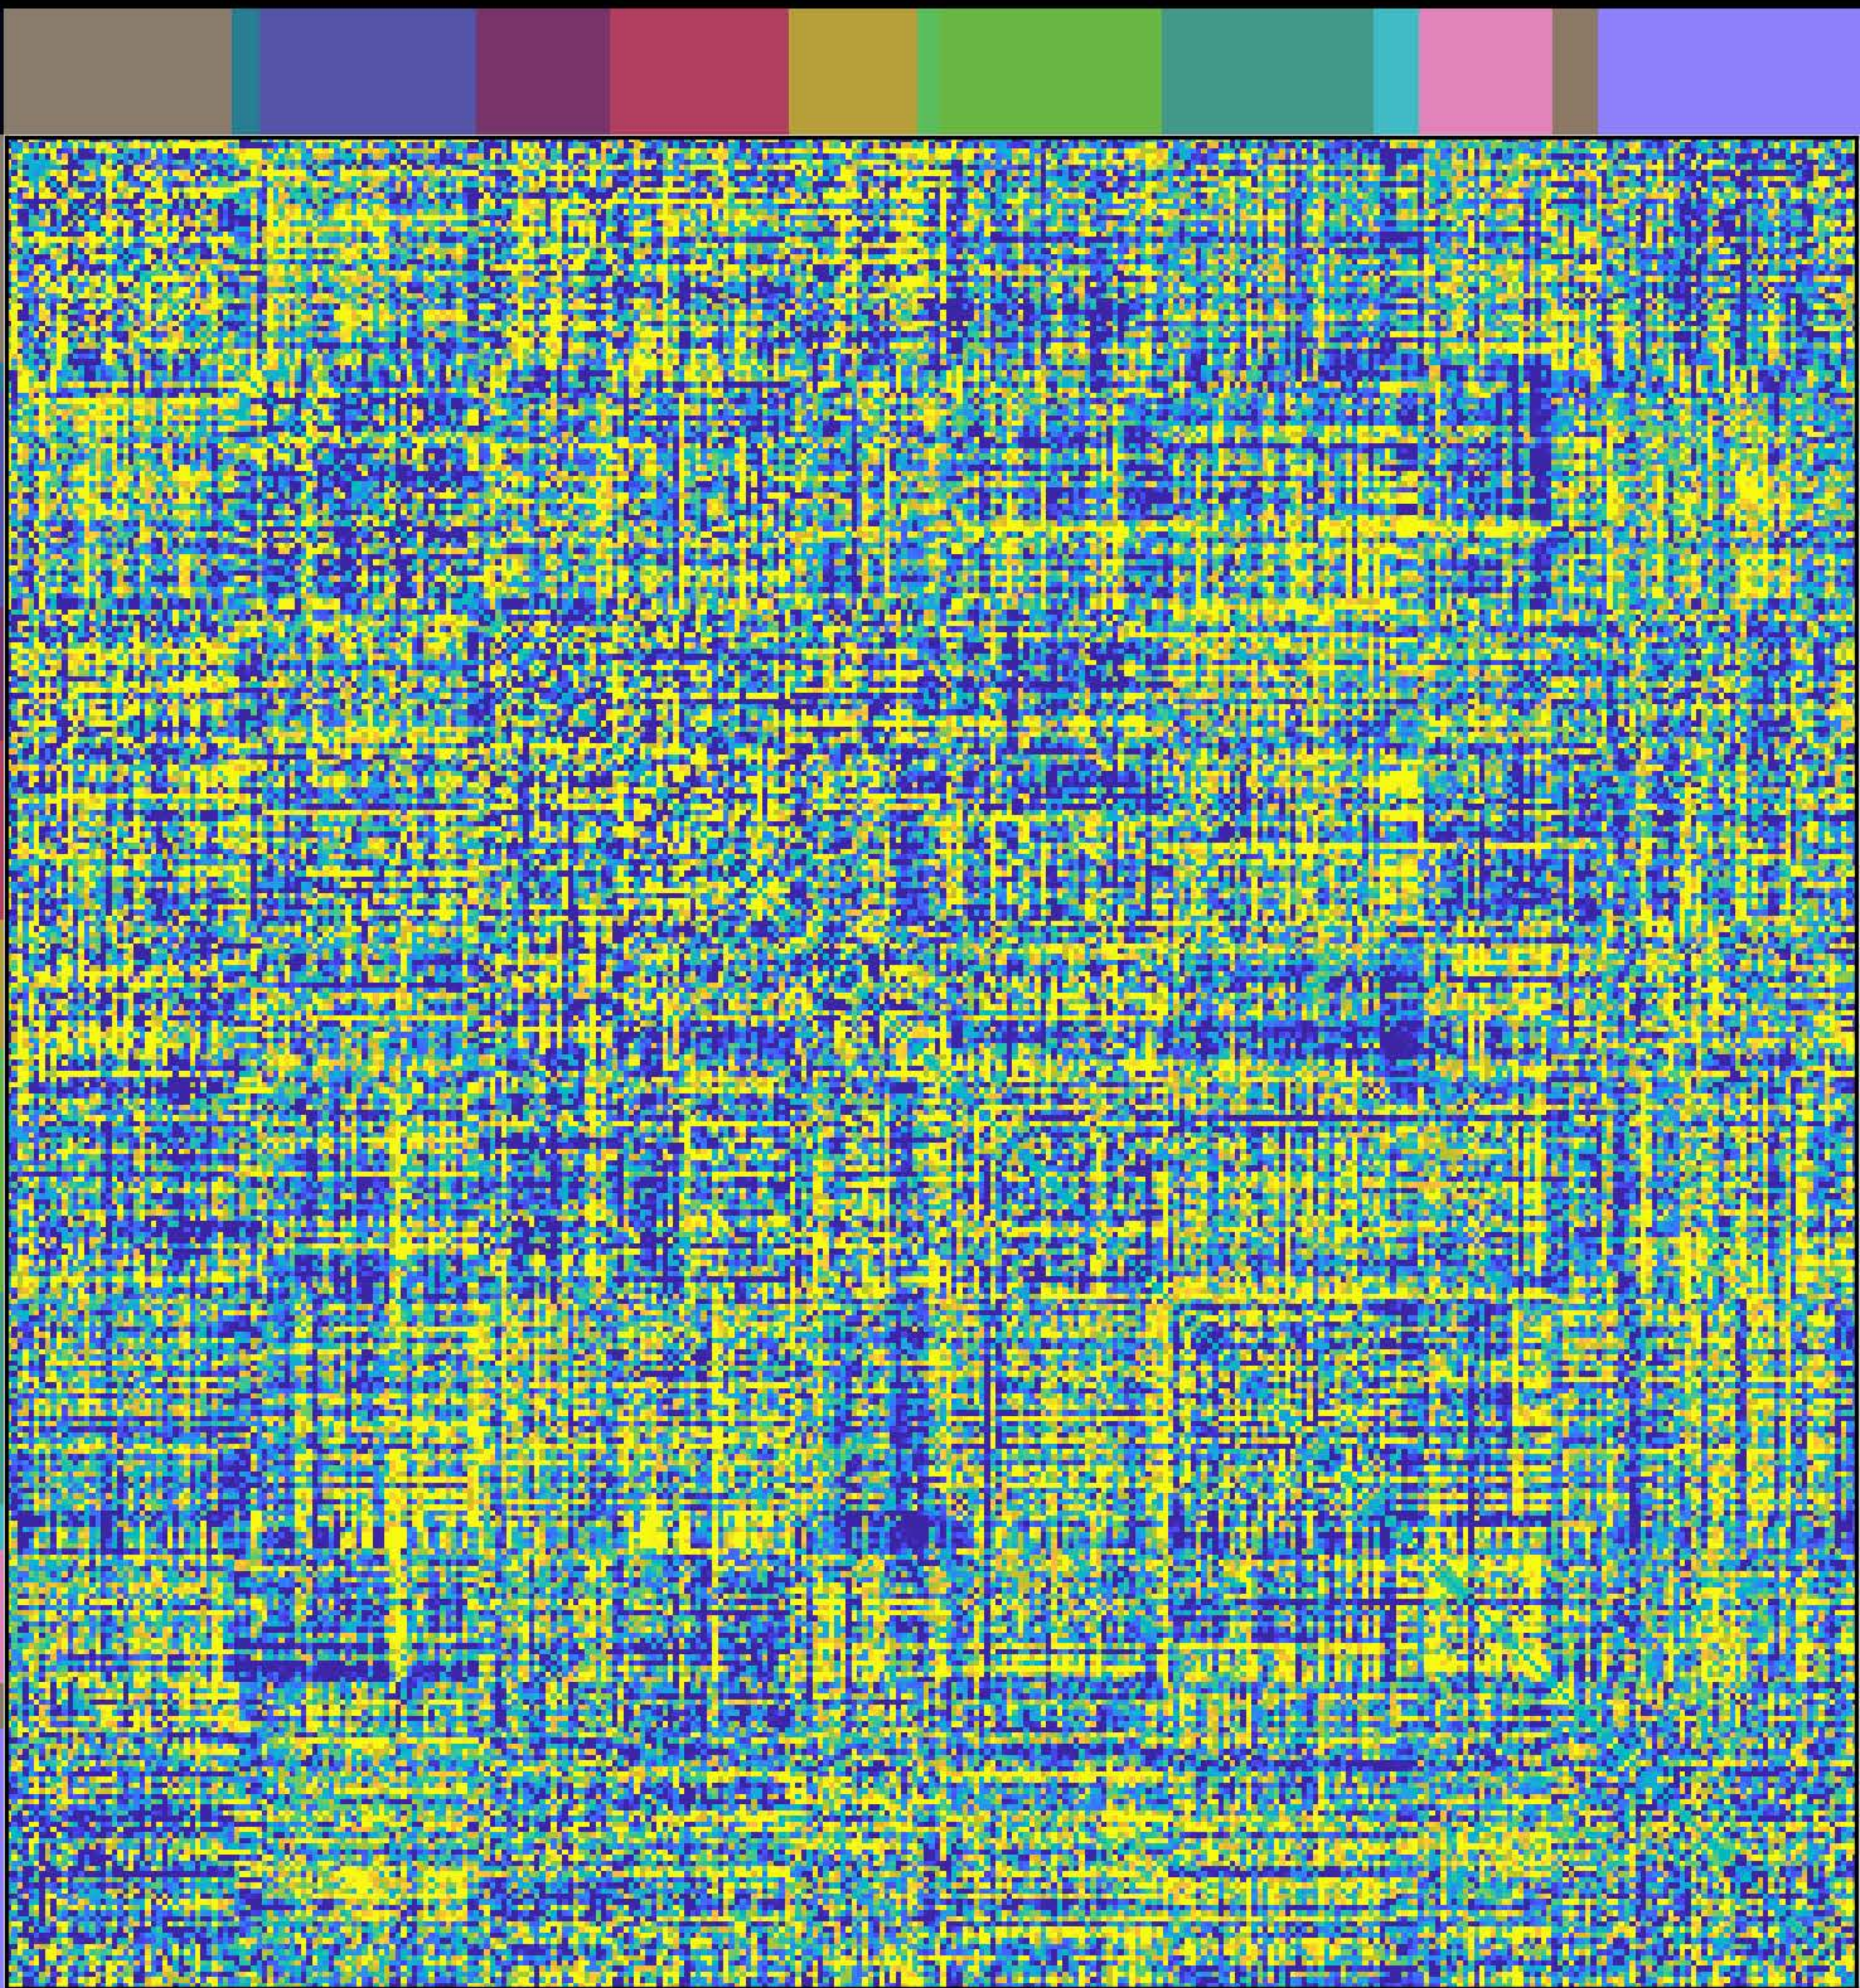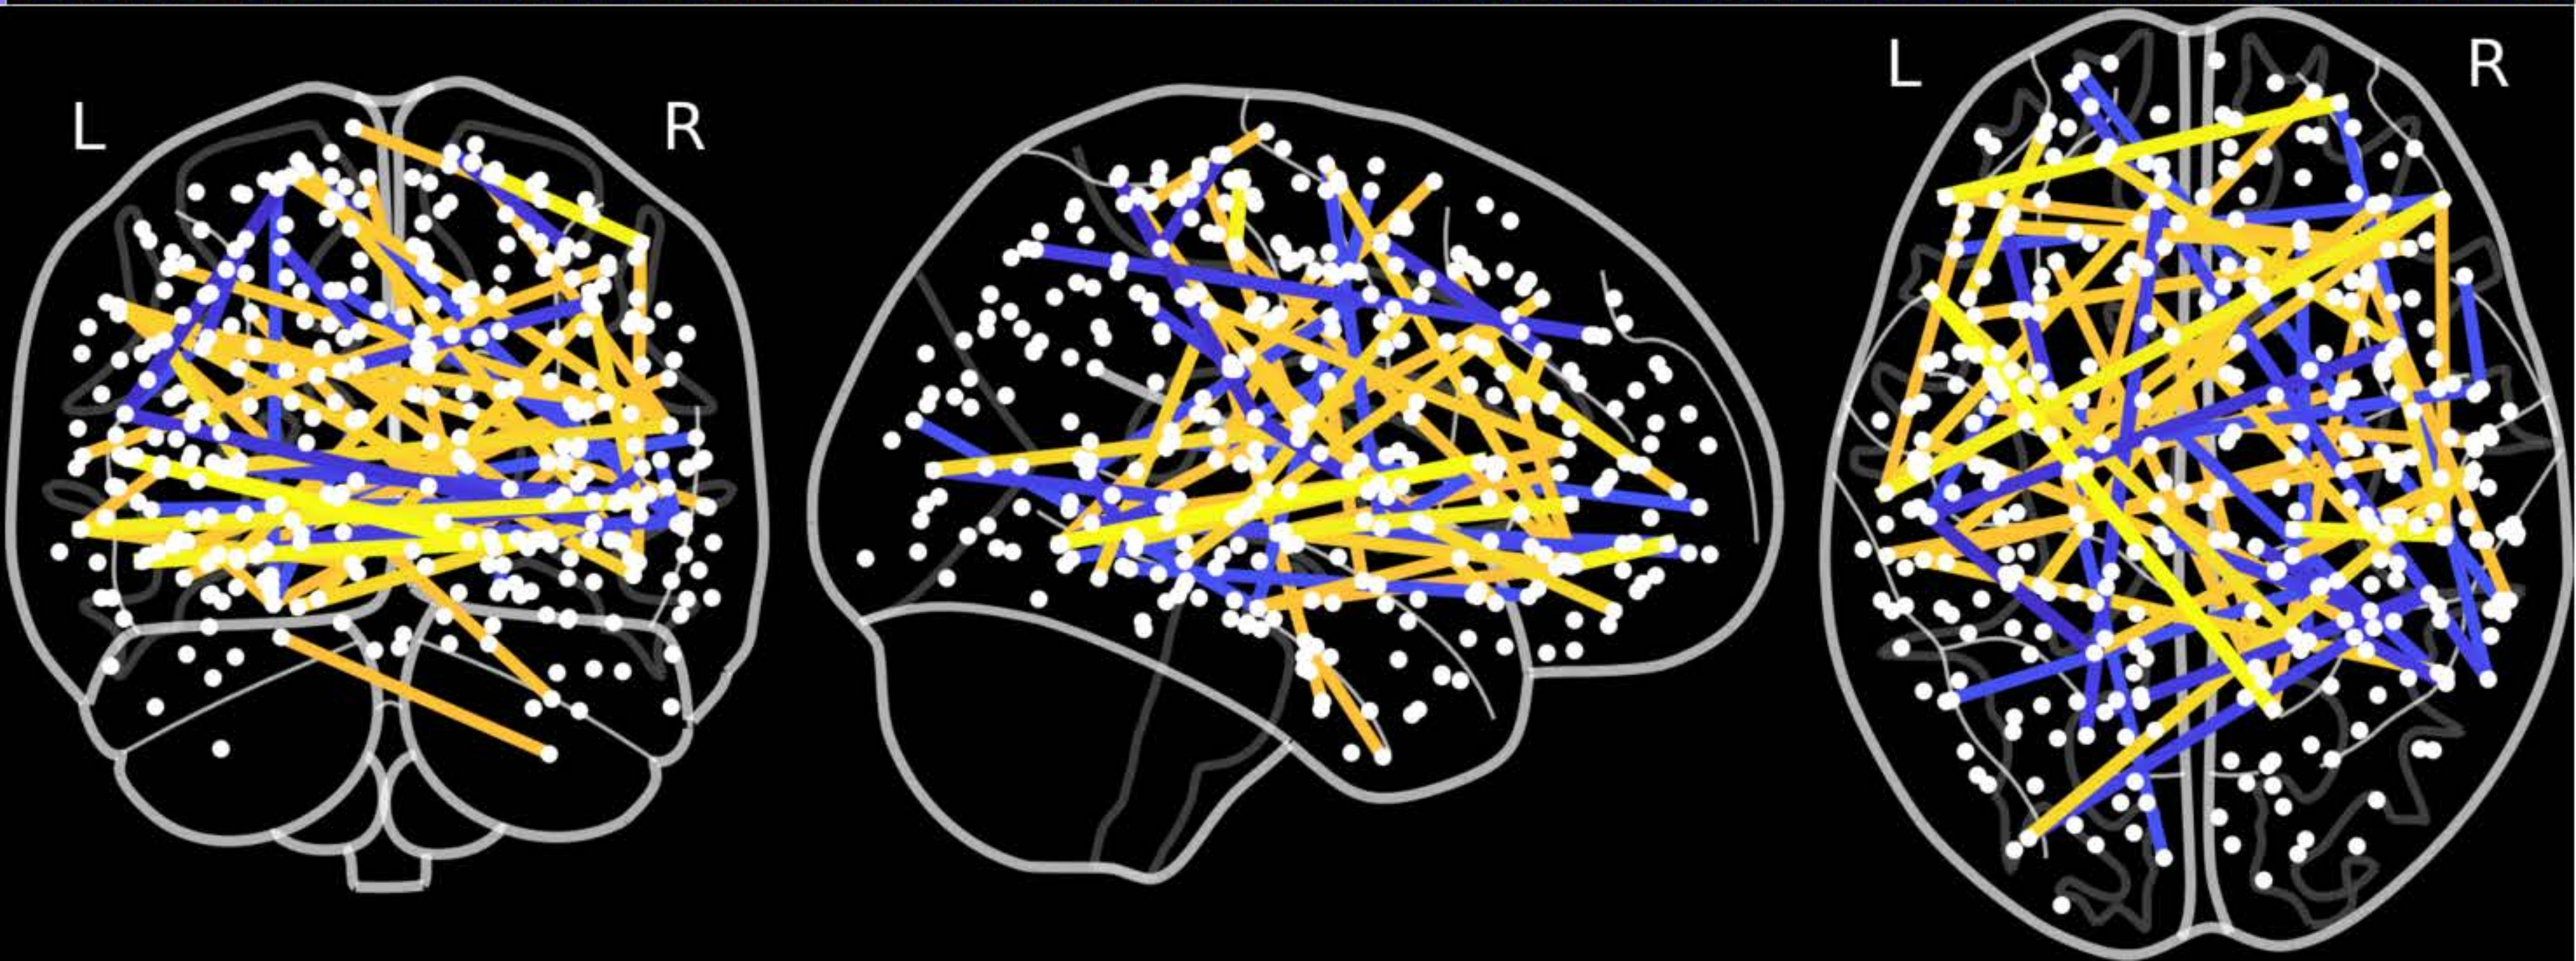



component\_87

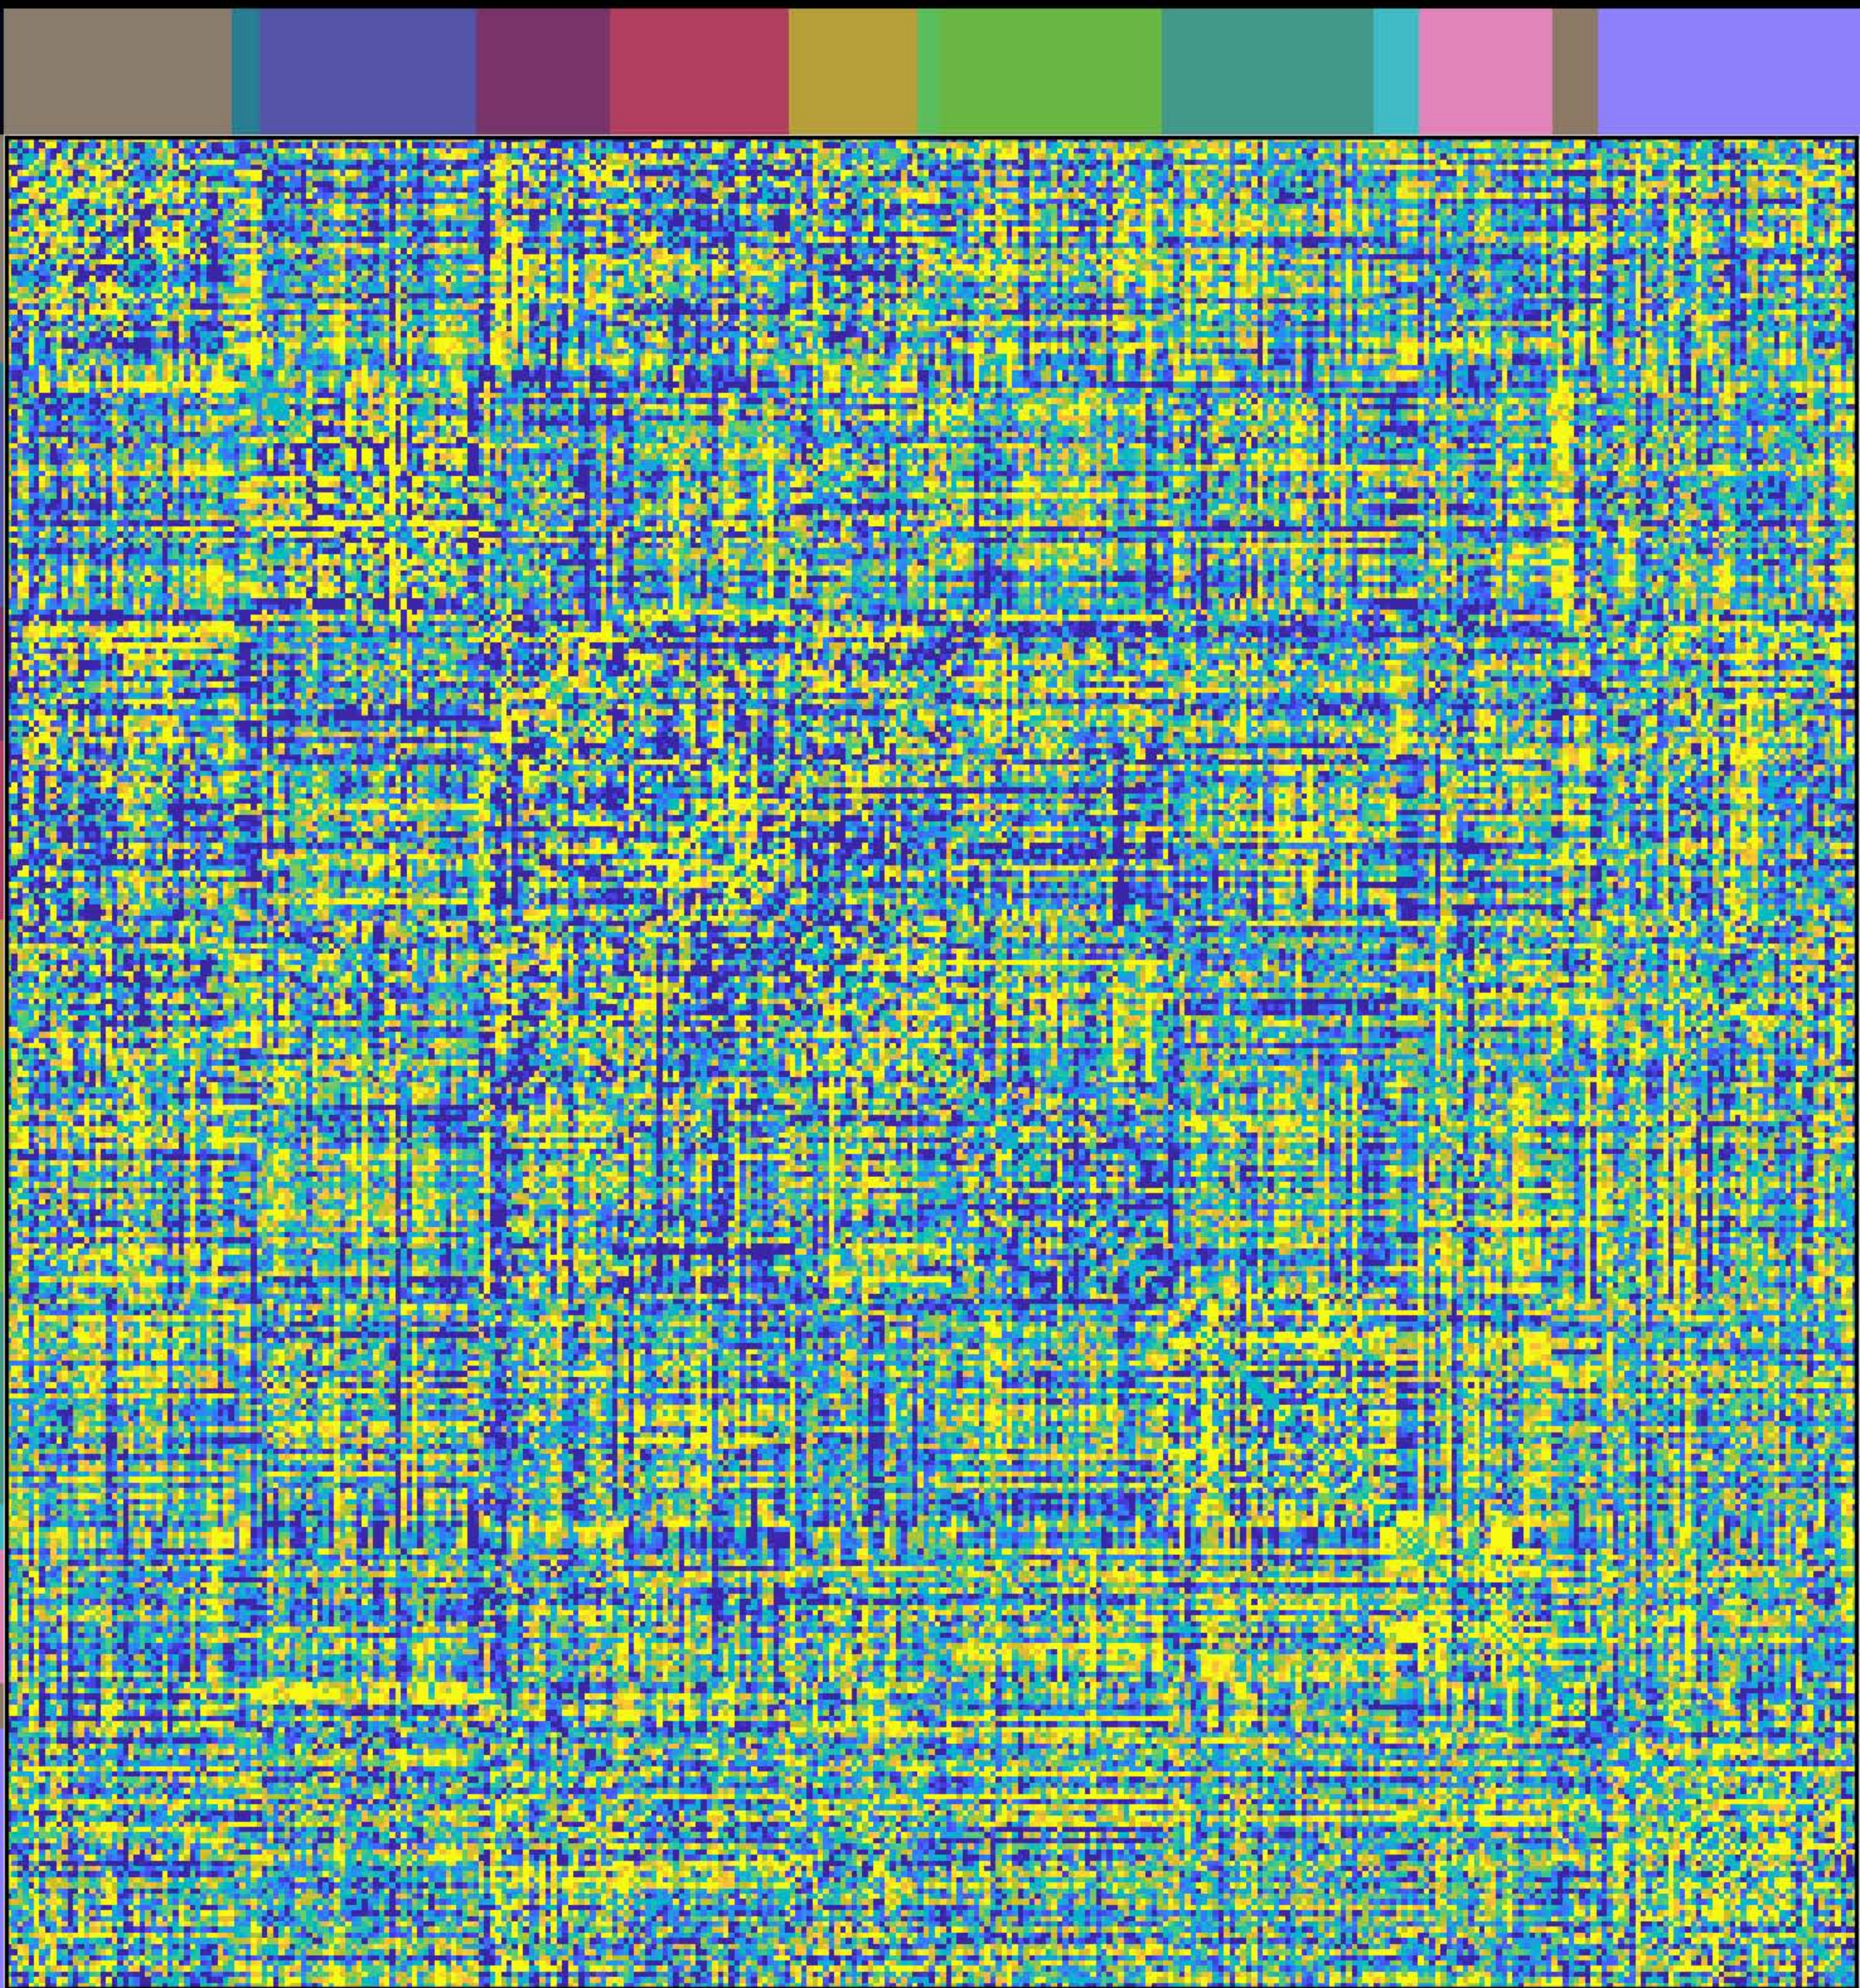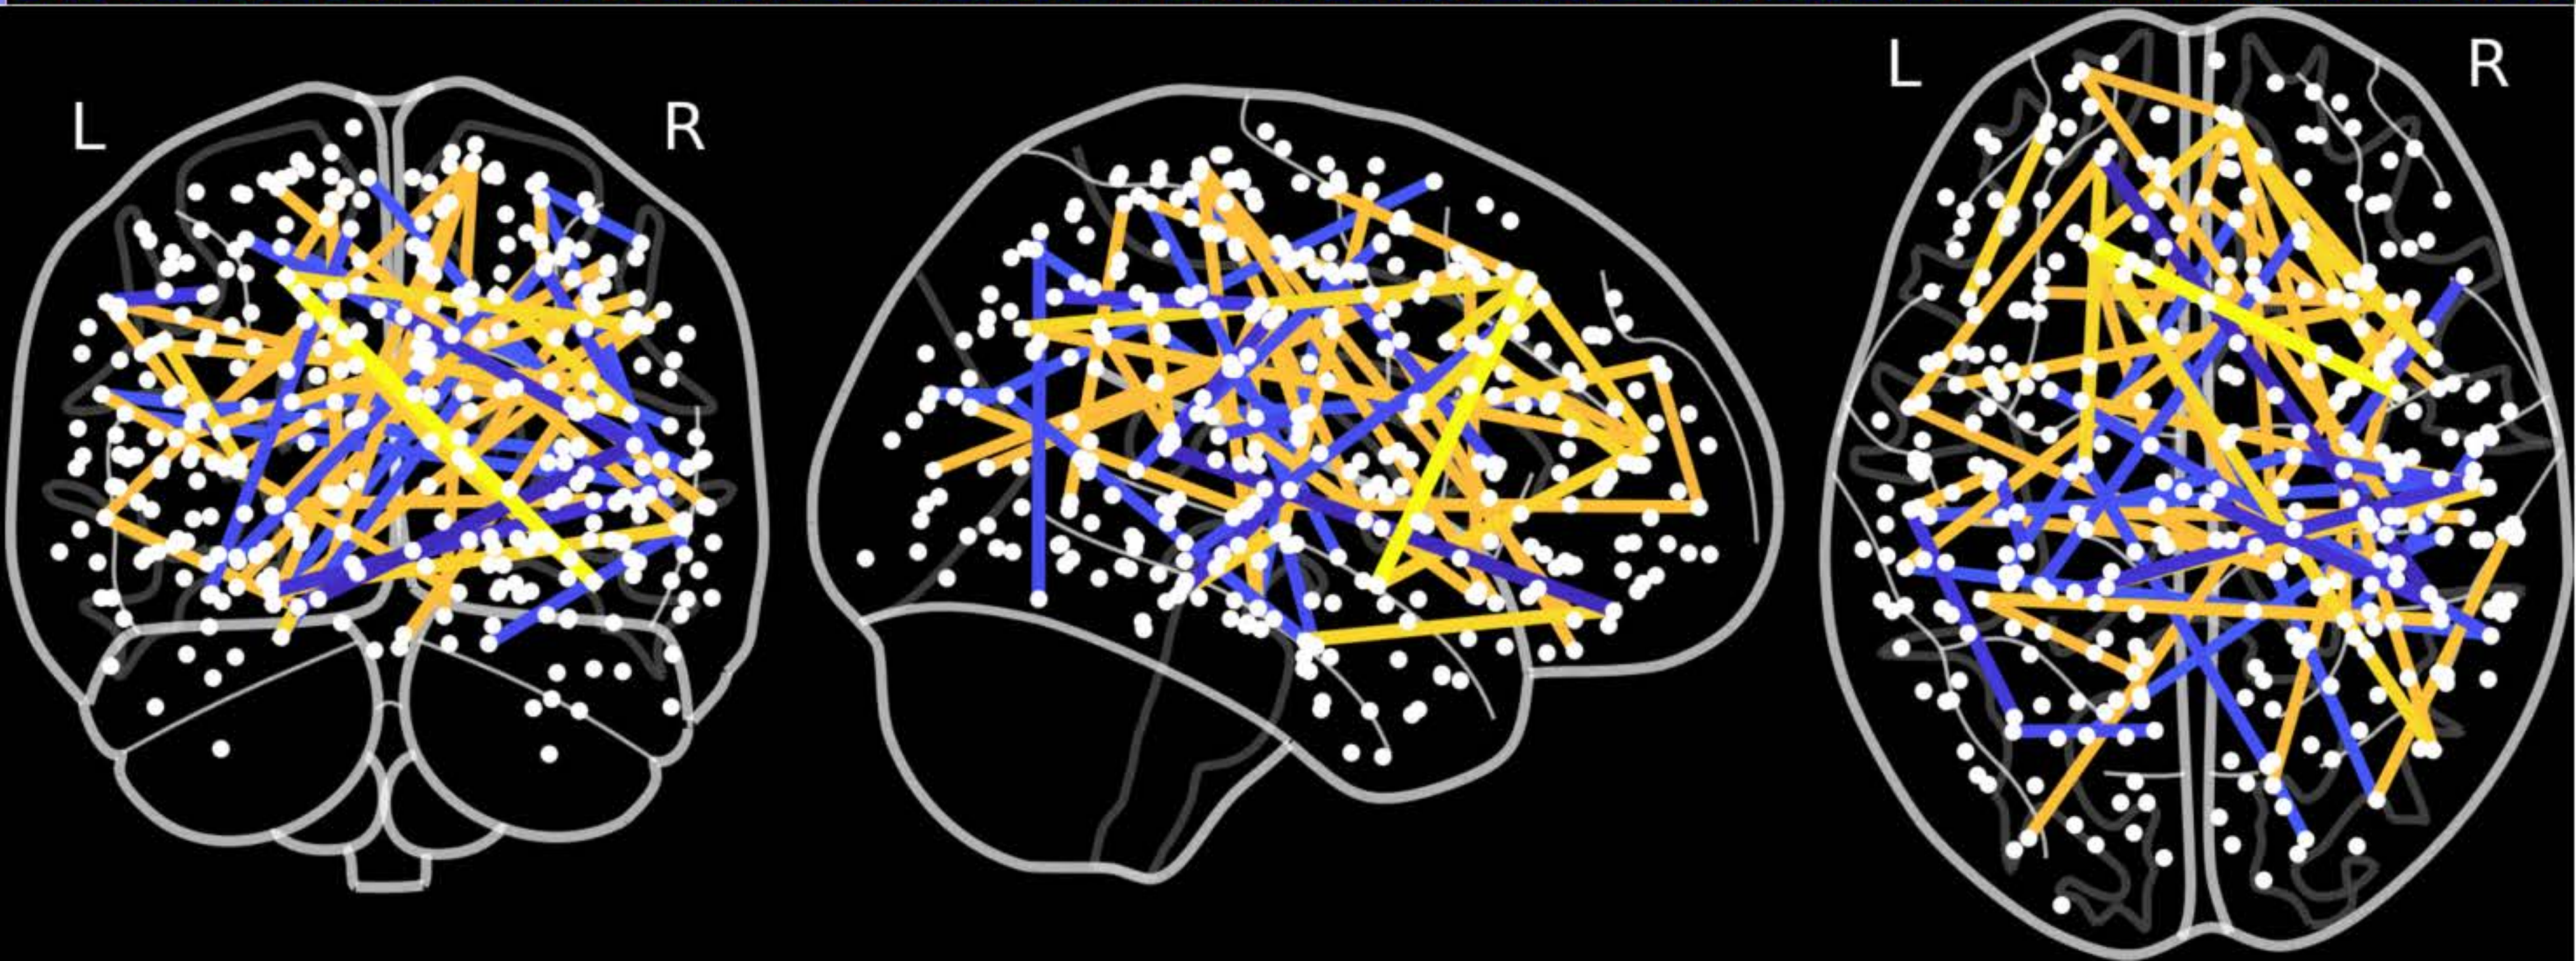



component\_88

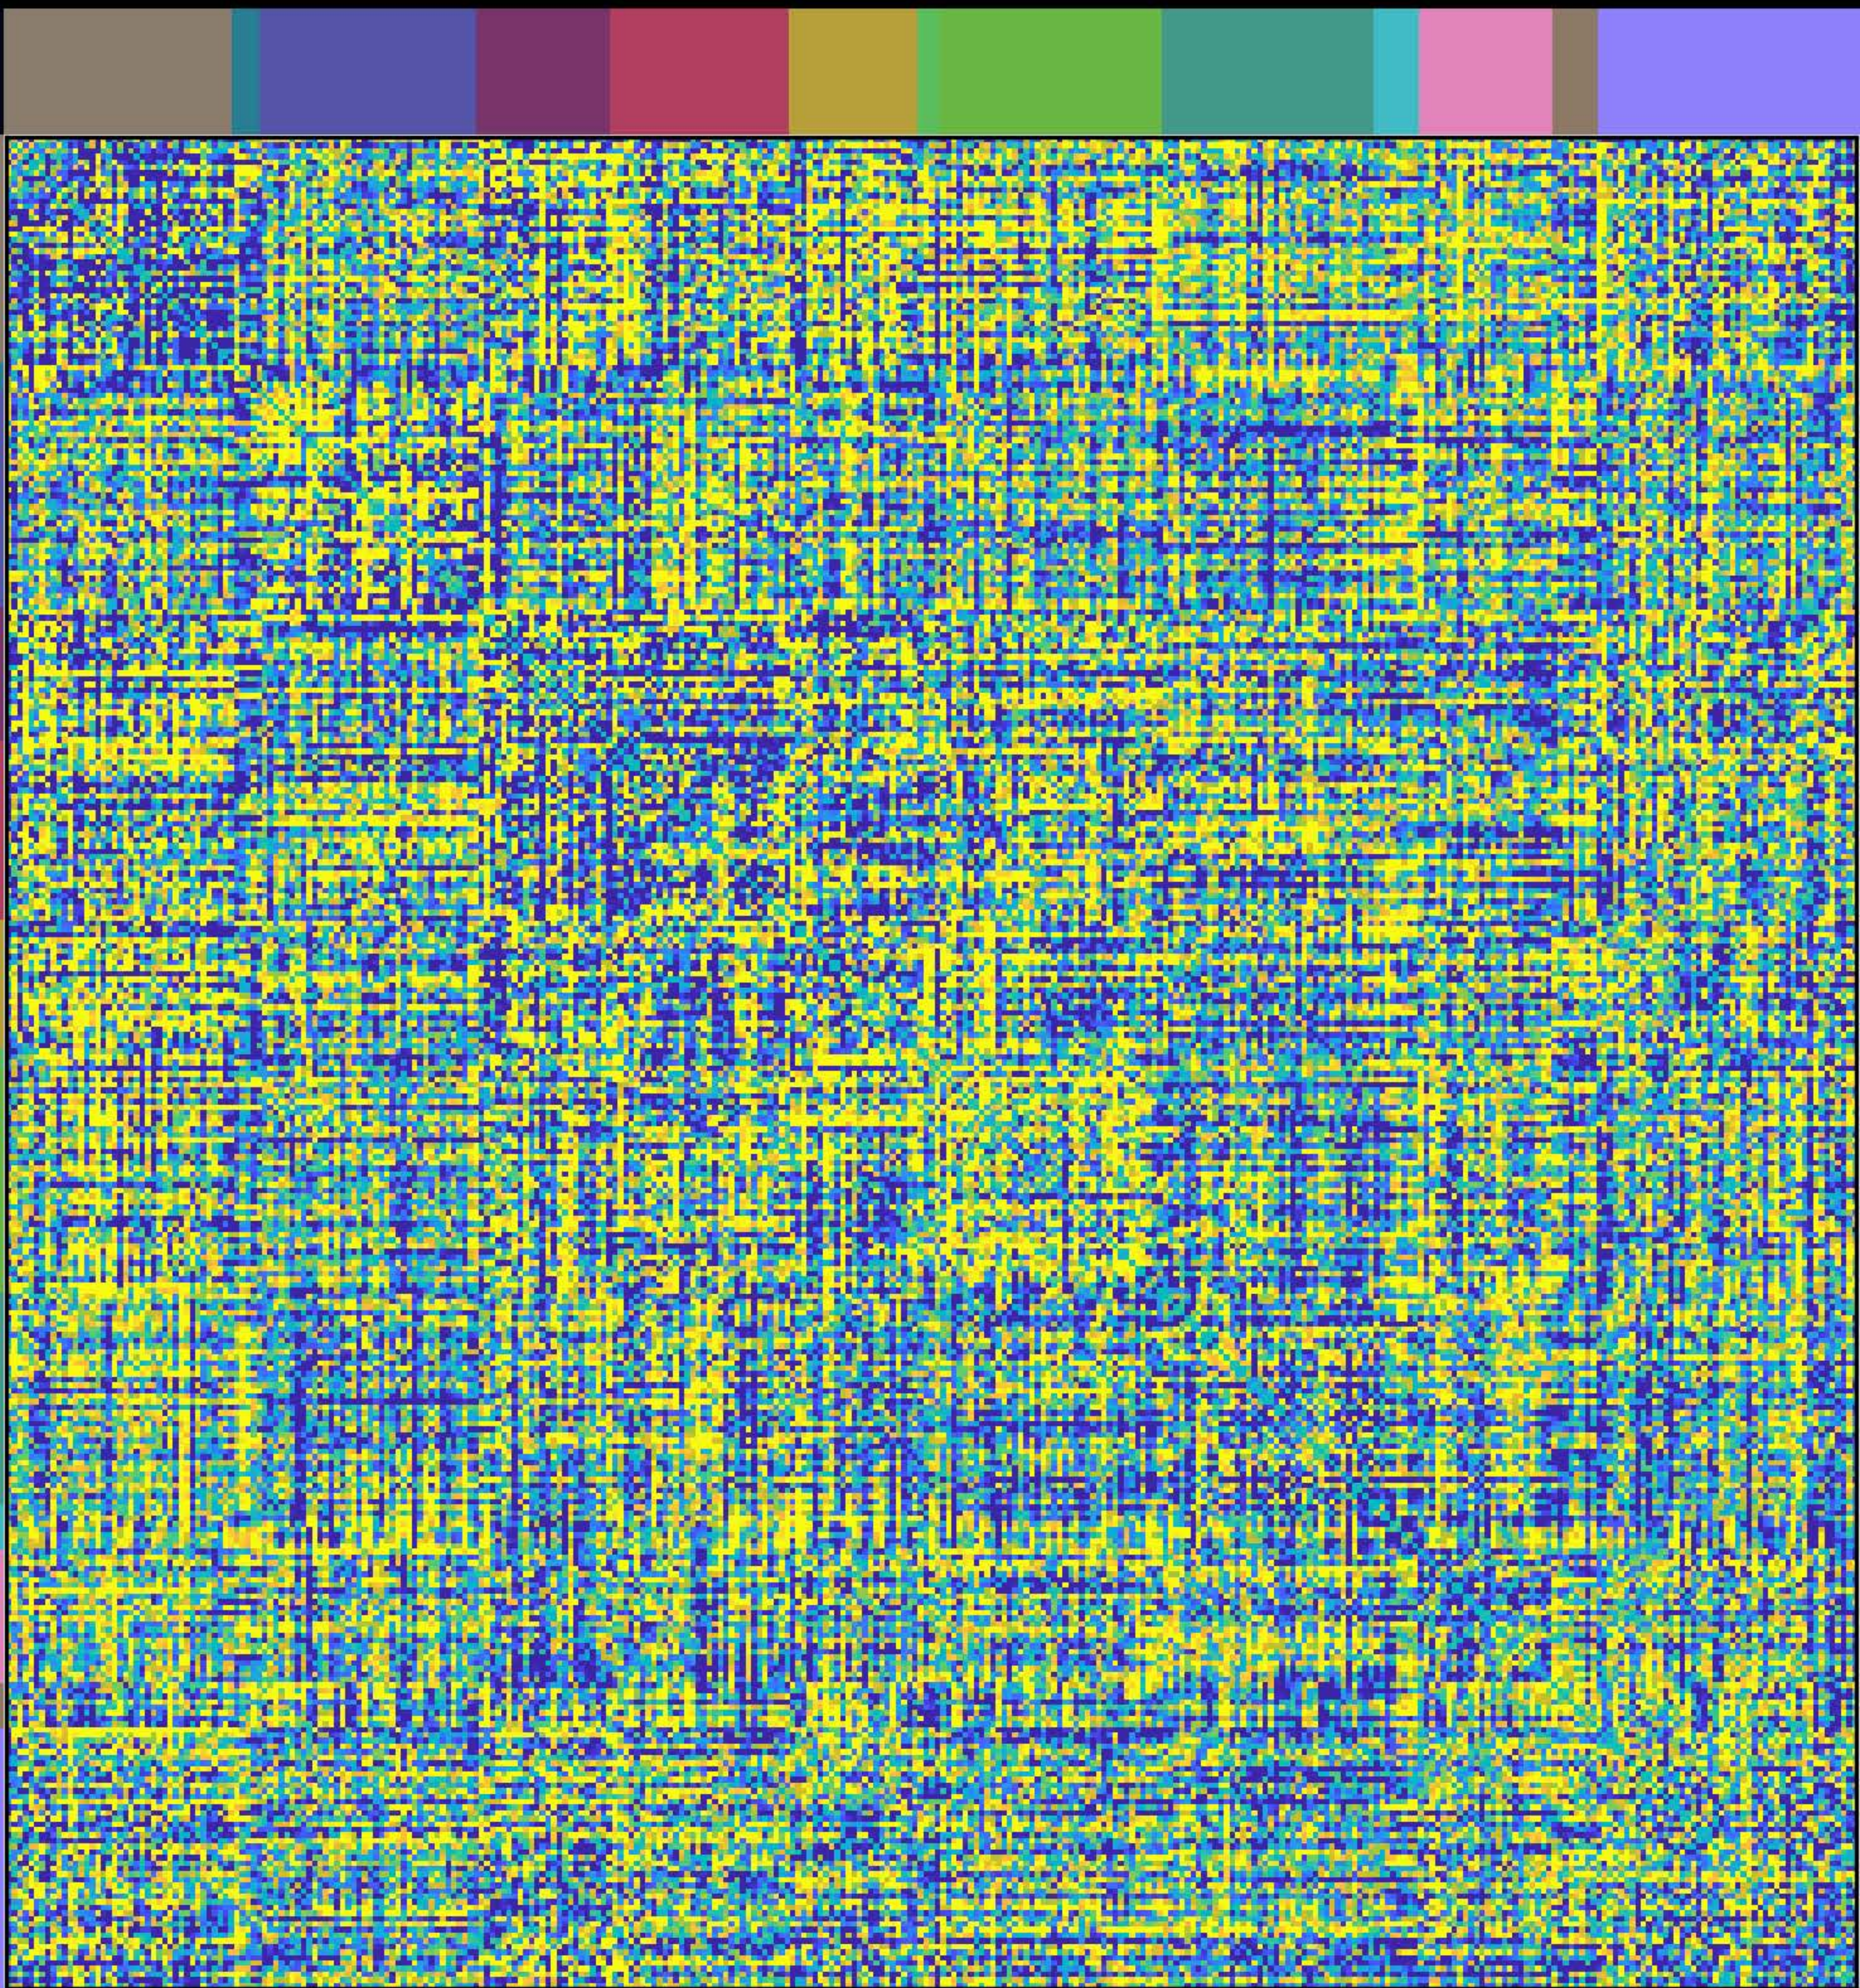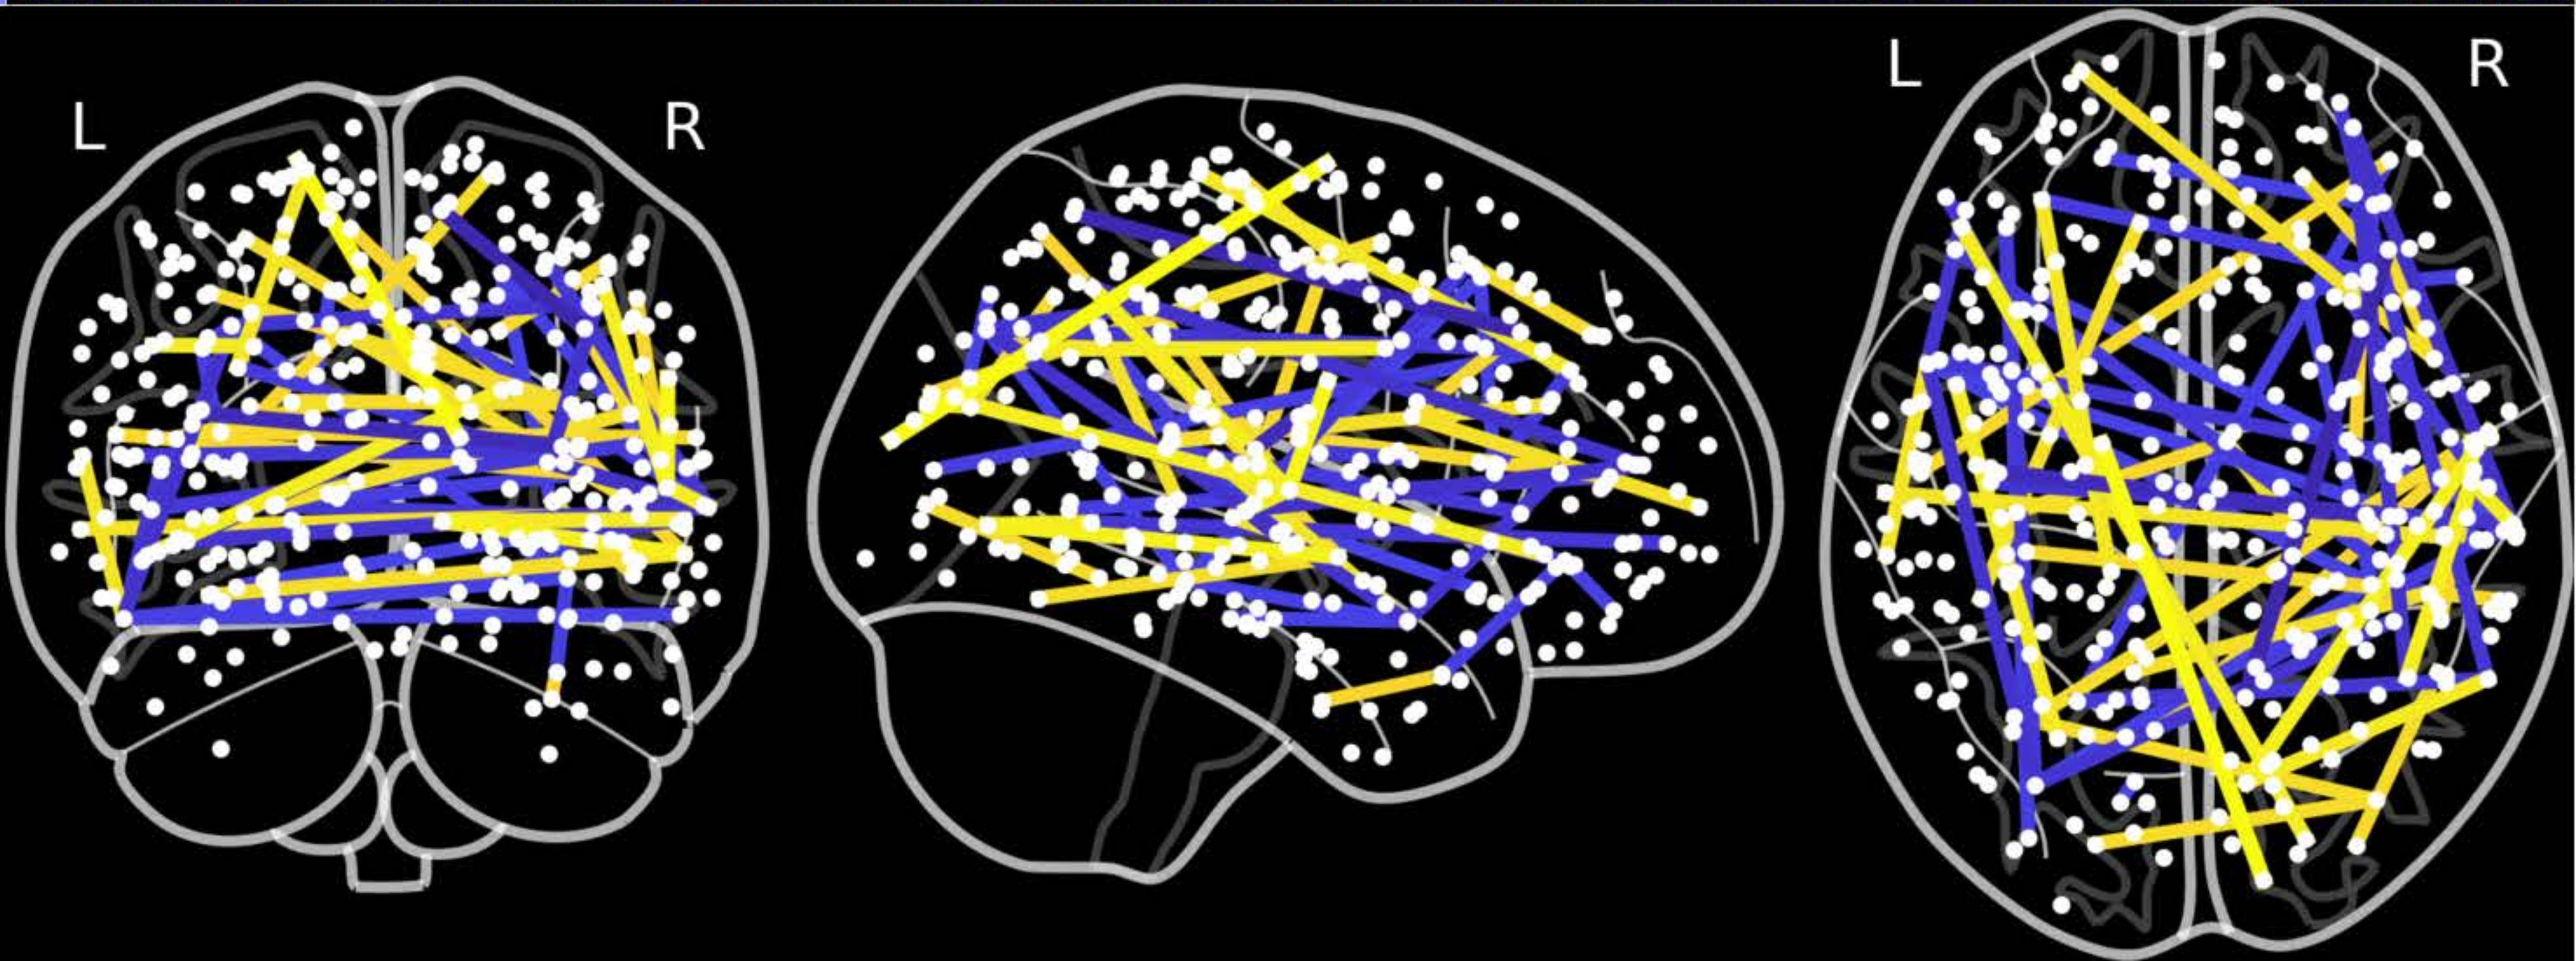



Healthy  
control  
group  
component  
maps



component\_0

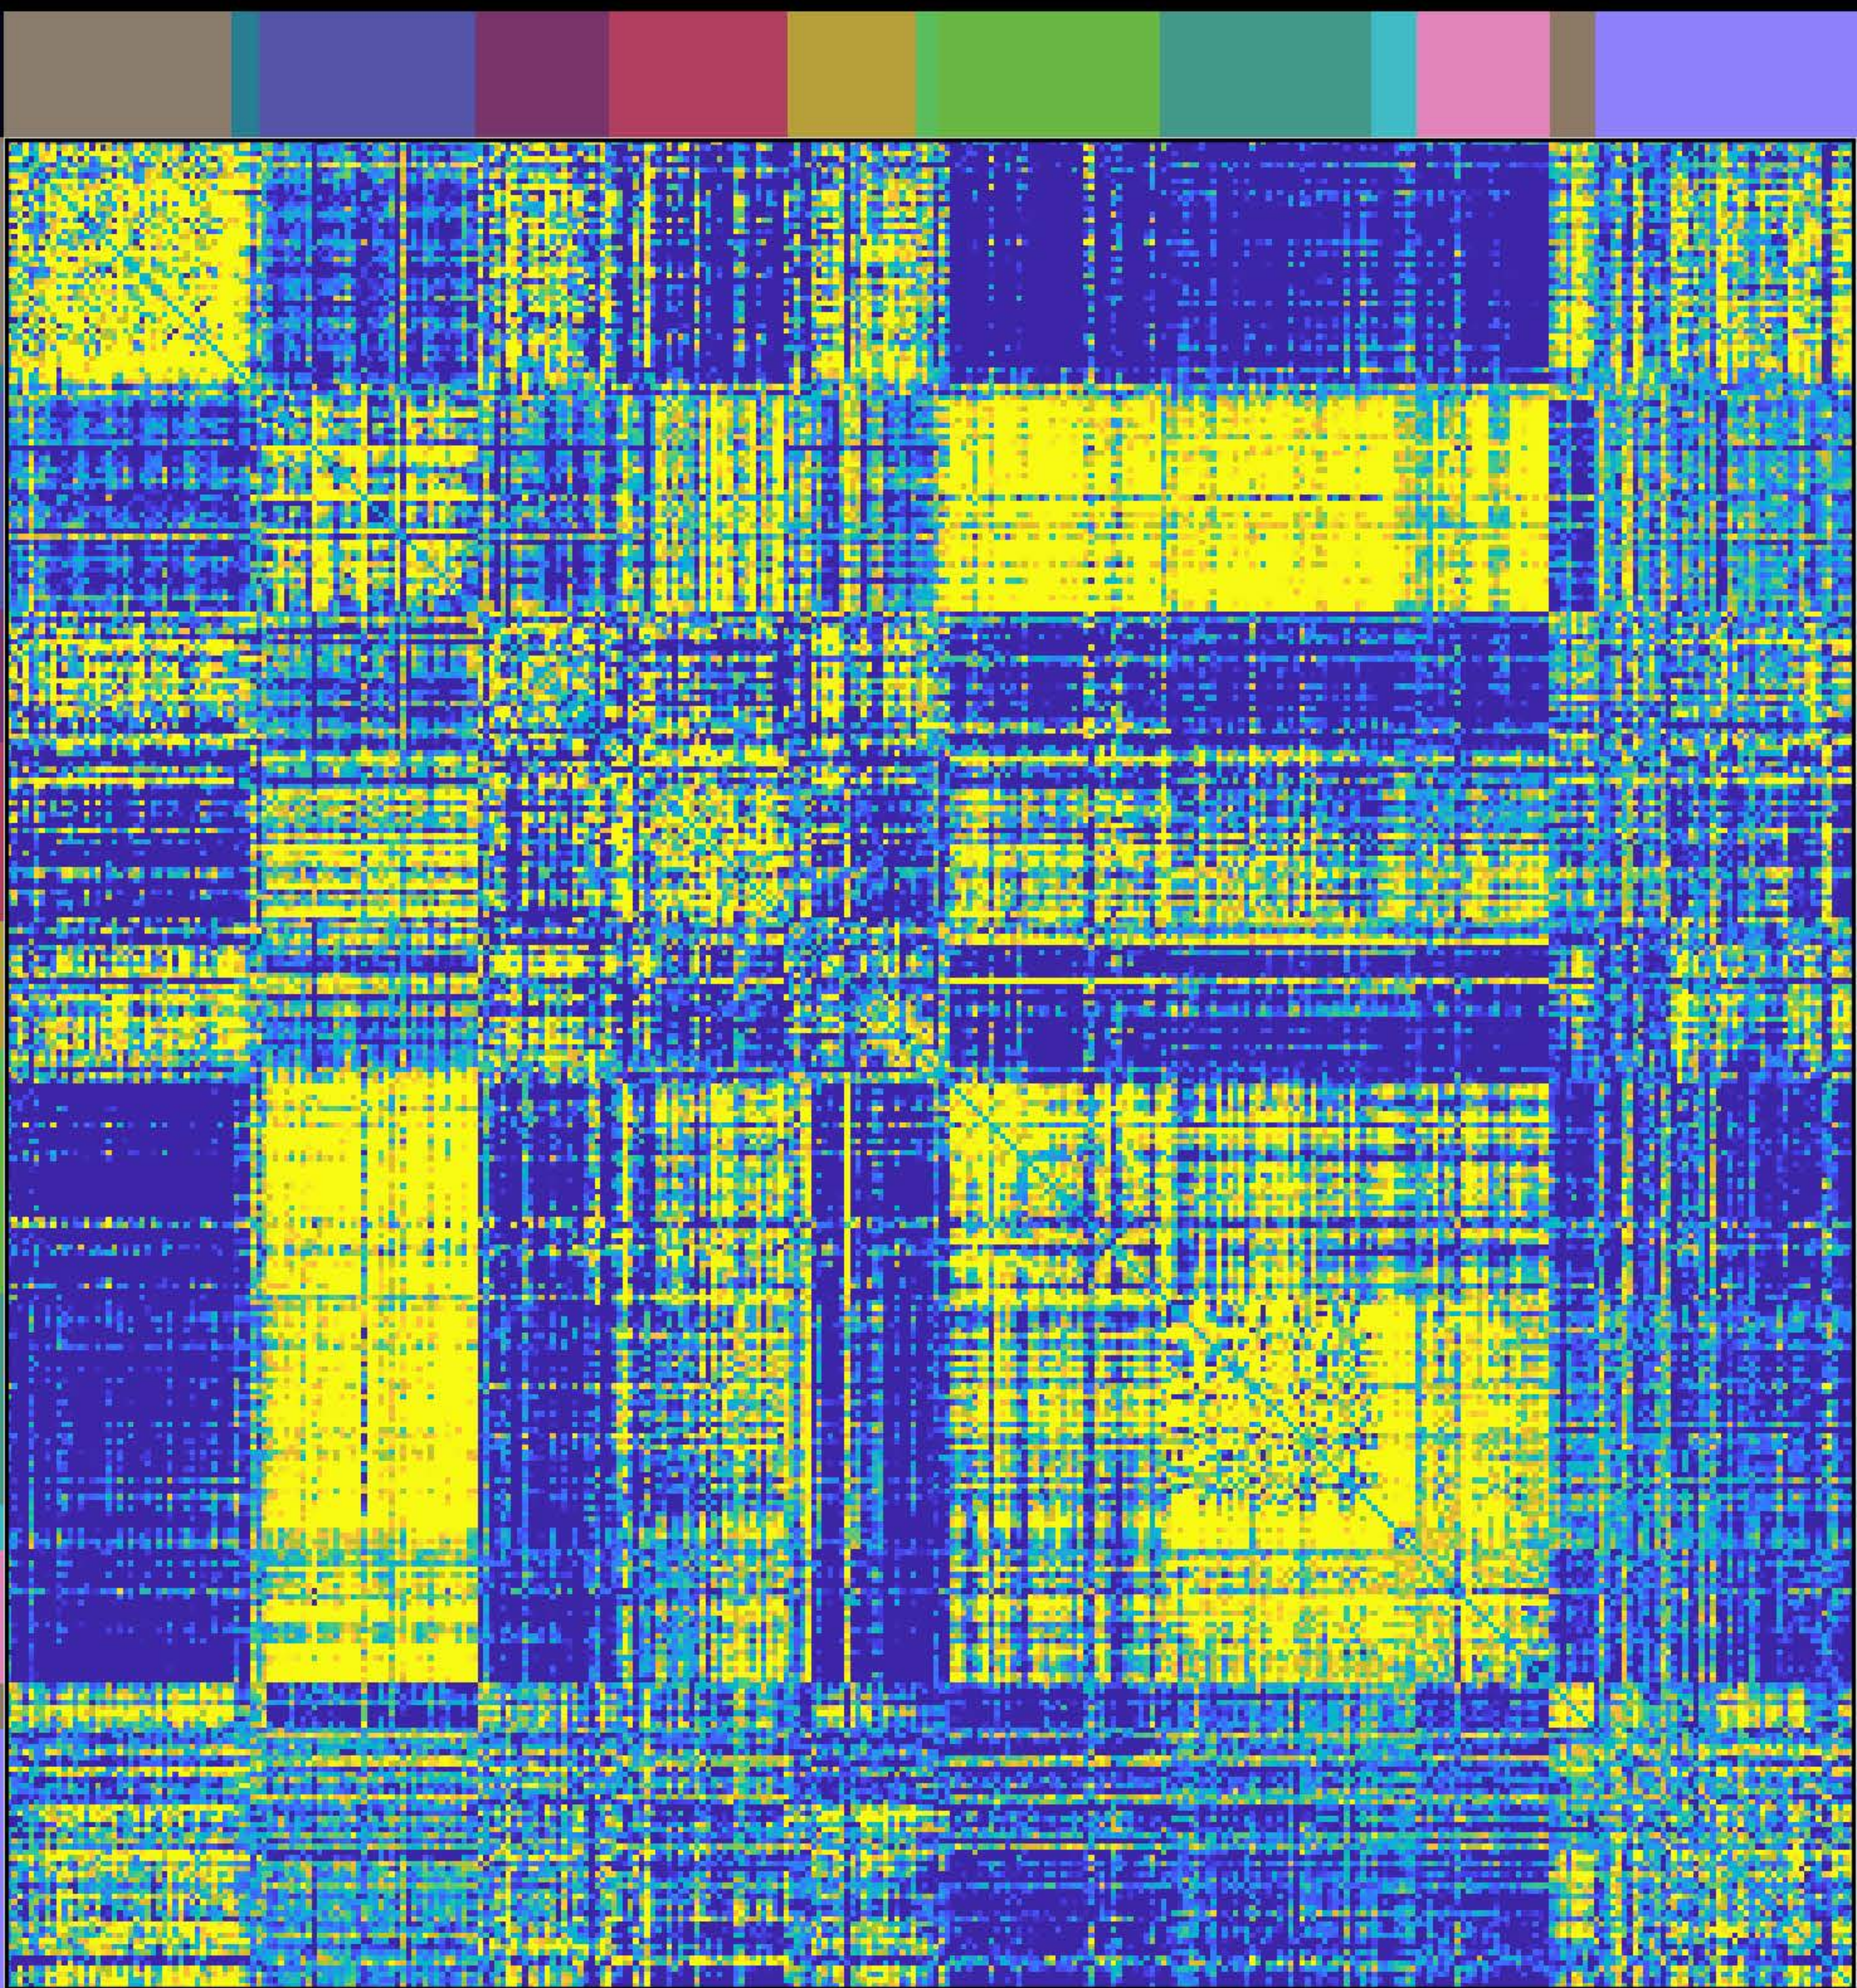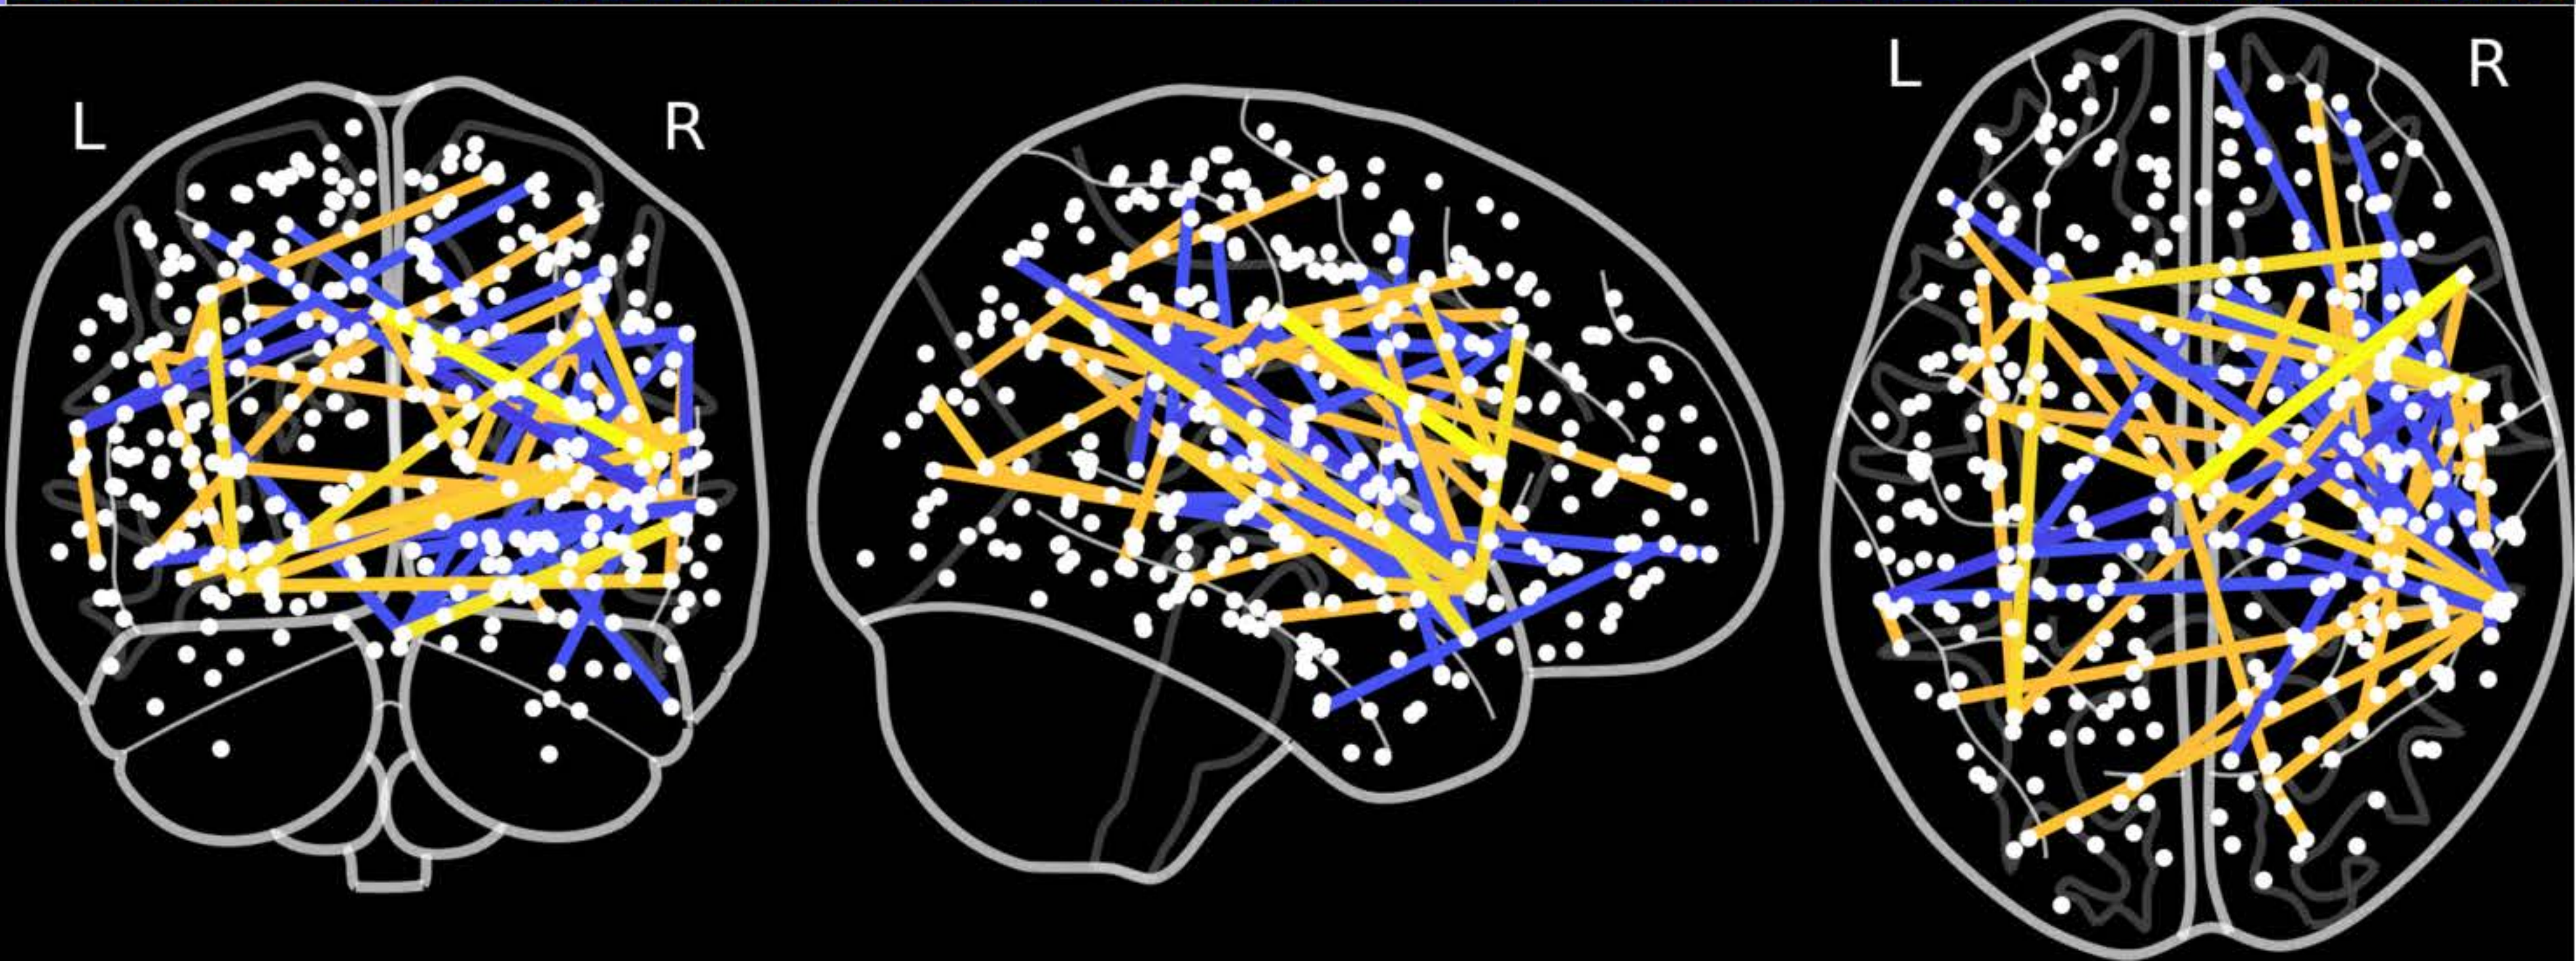



component\_1

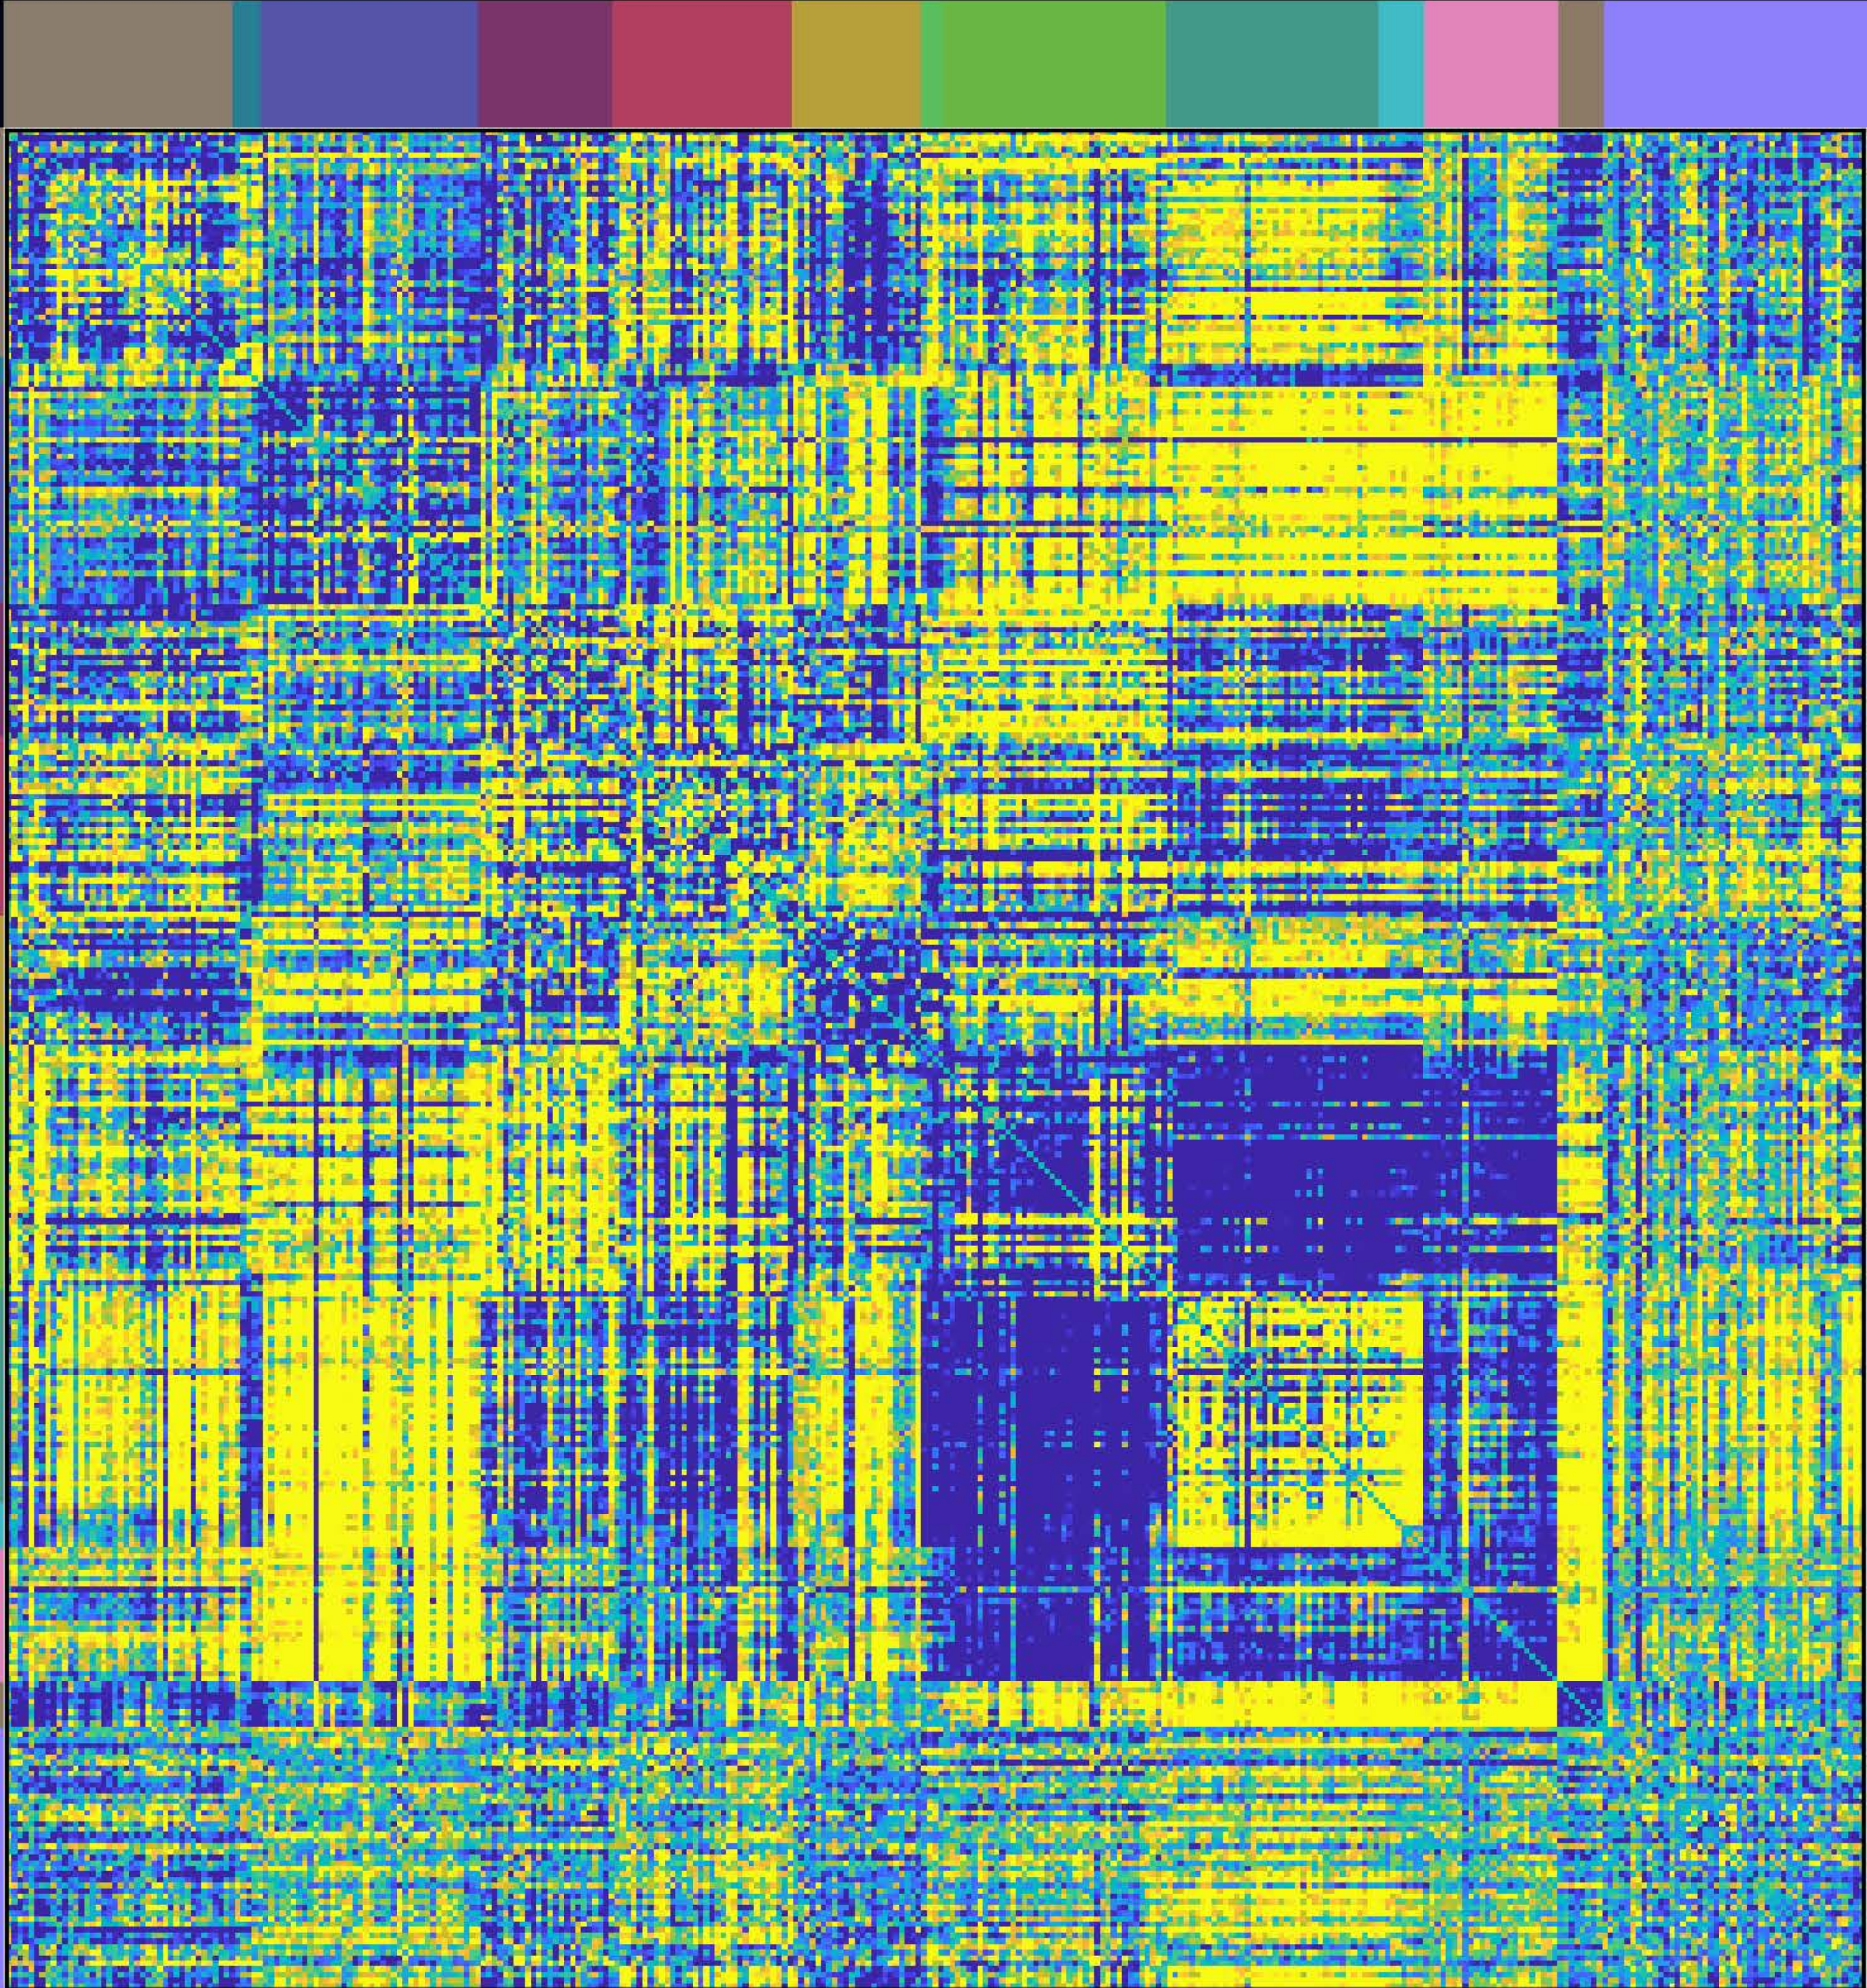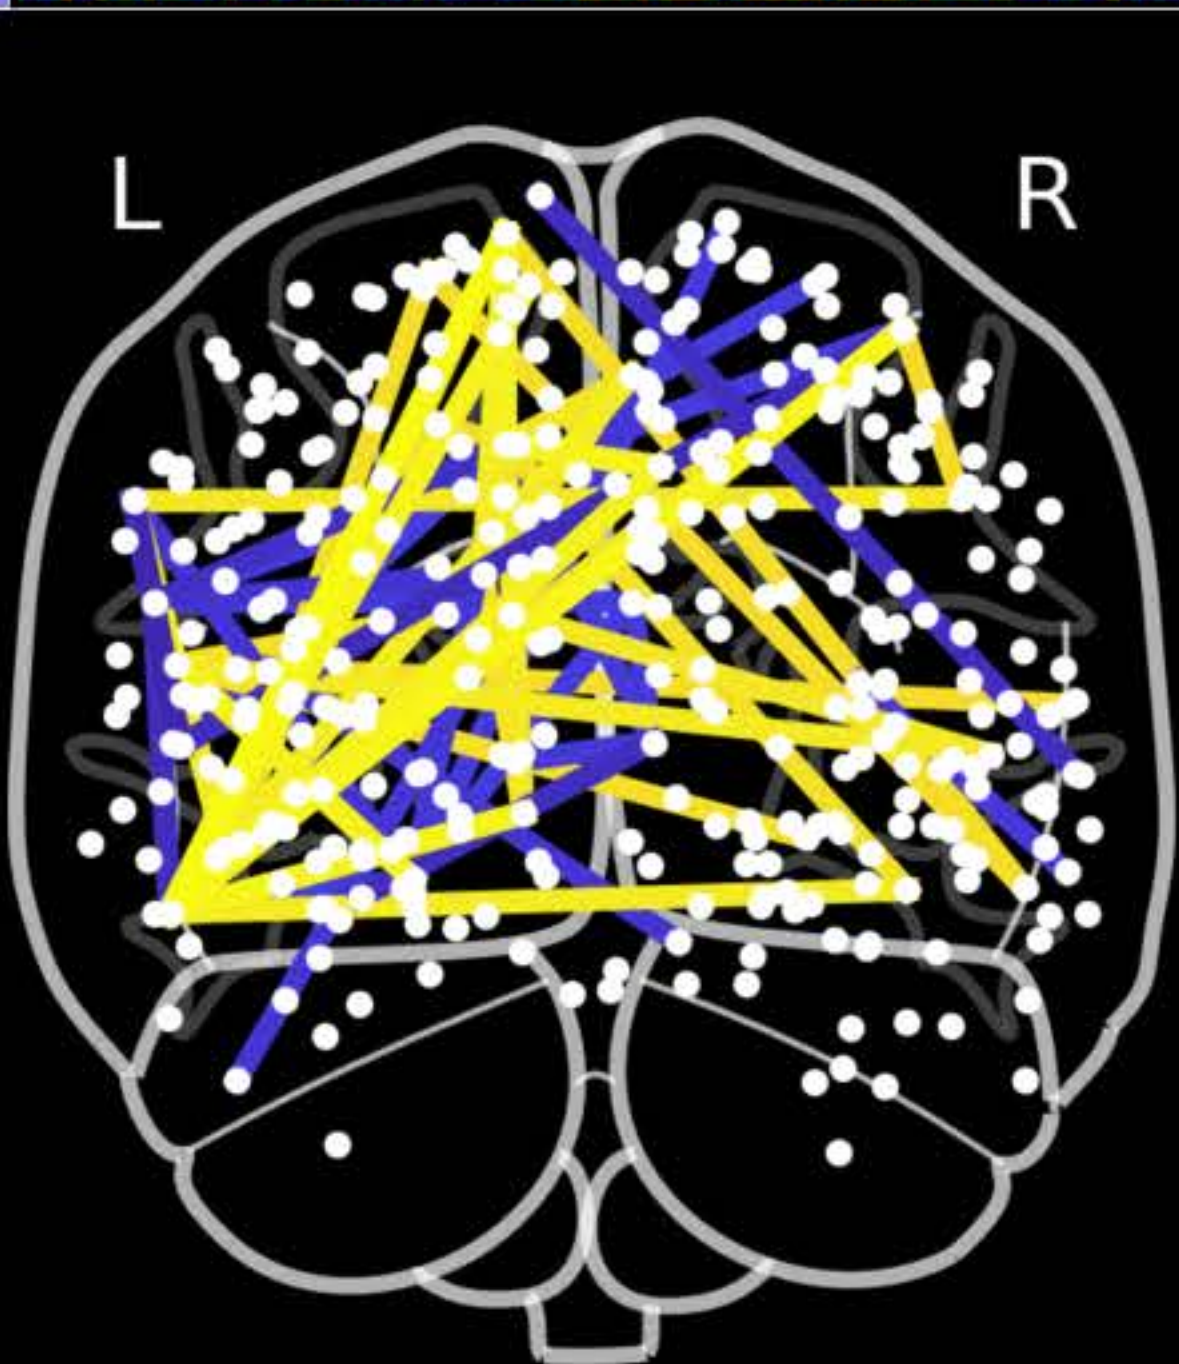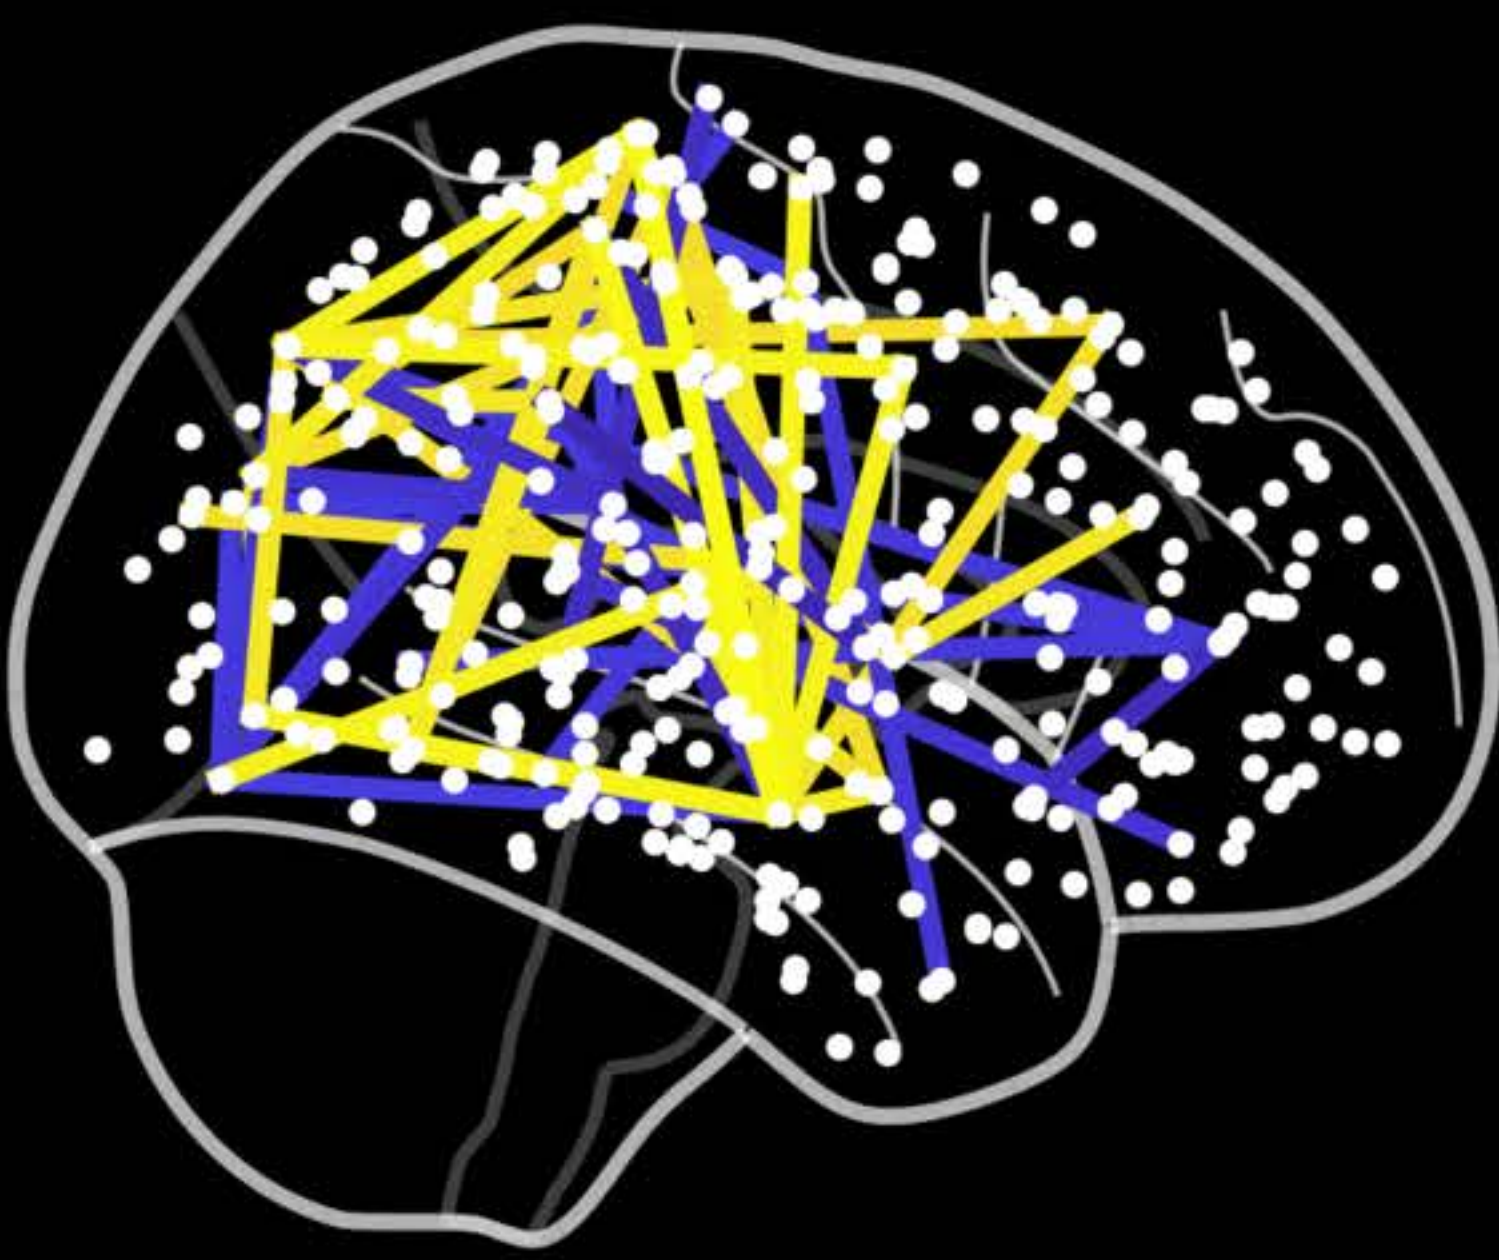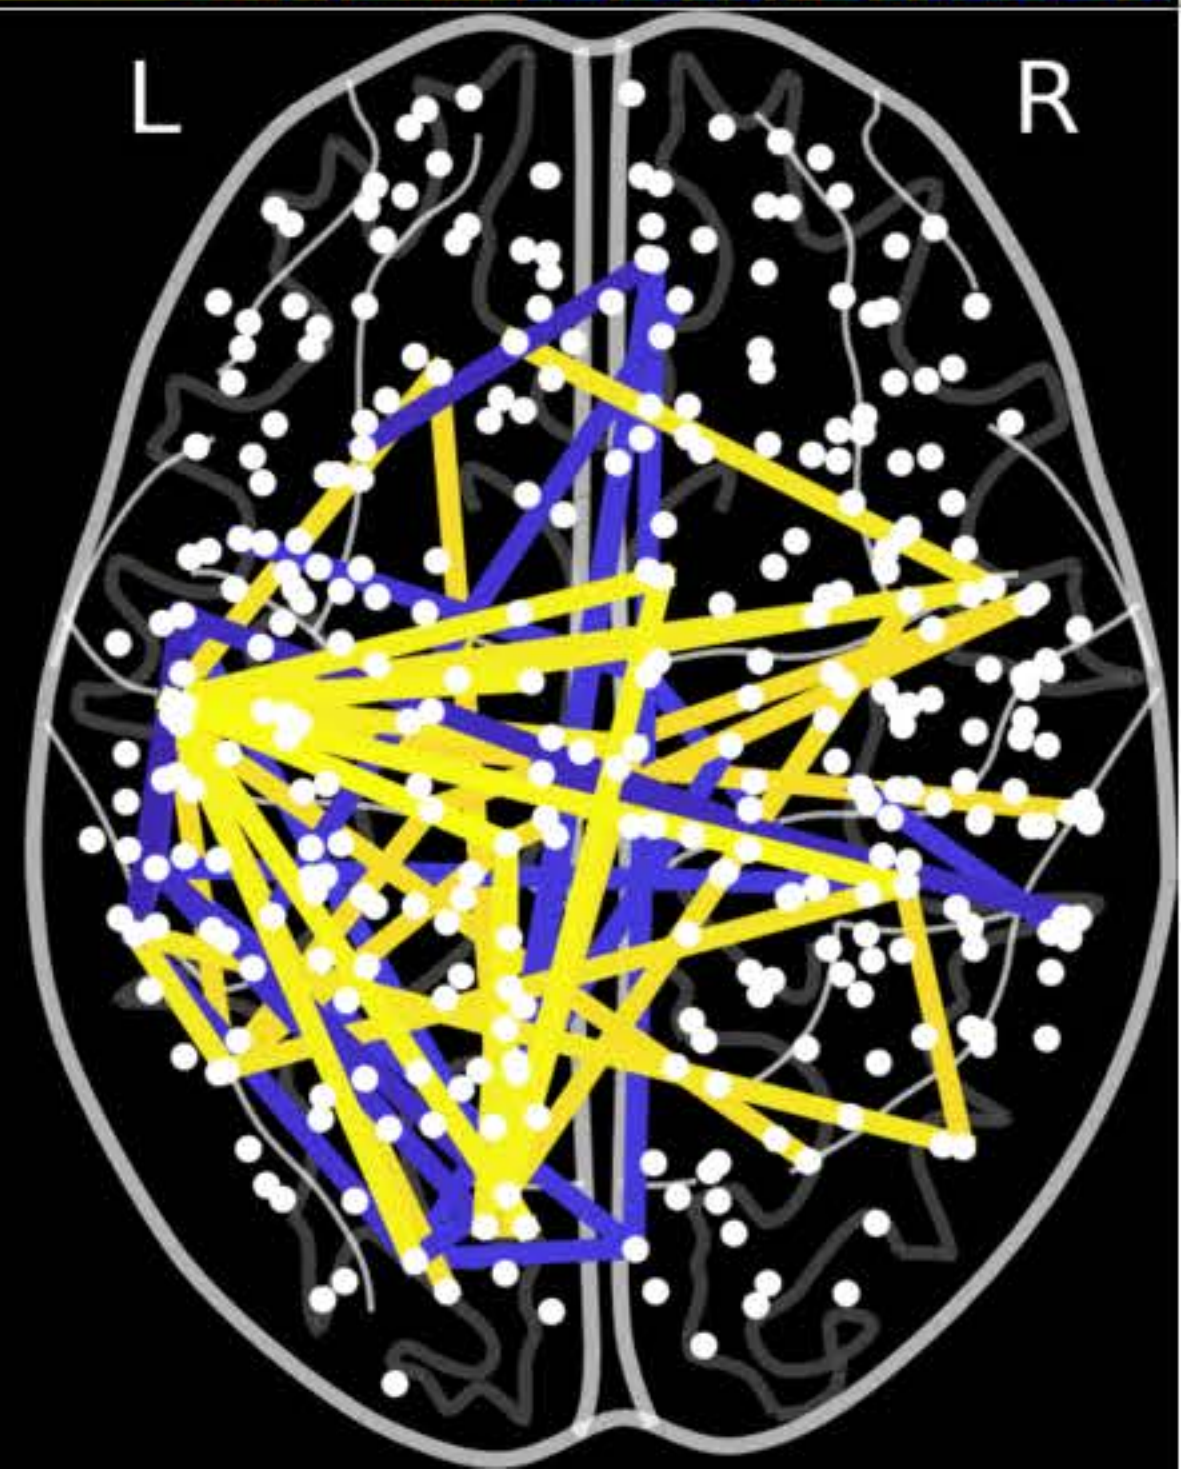



component\_2

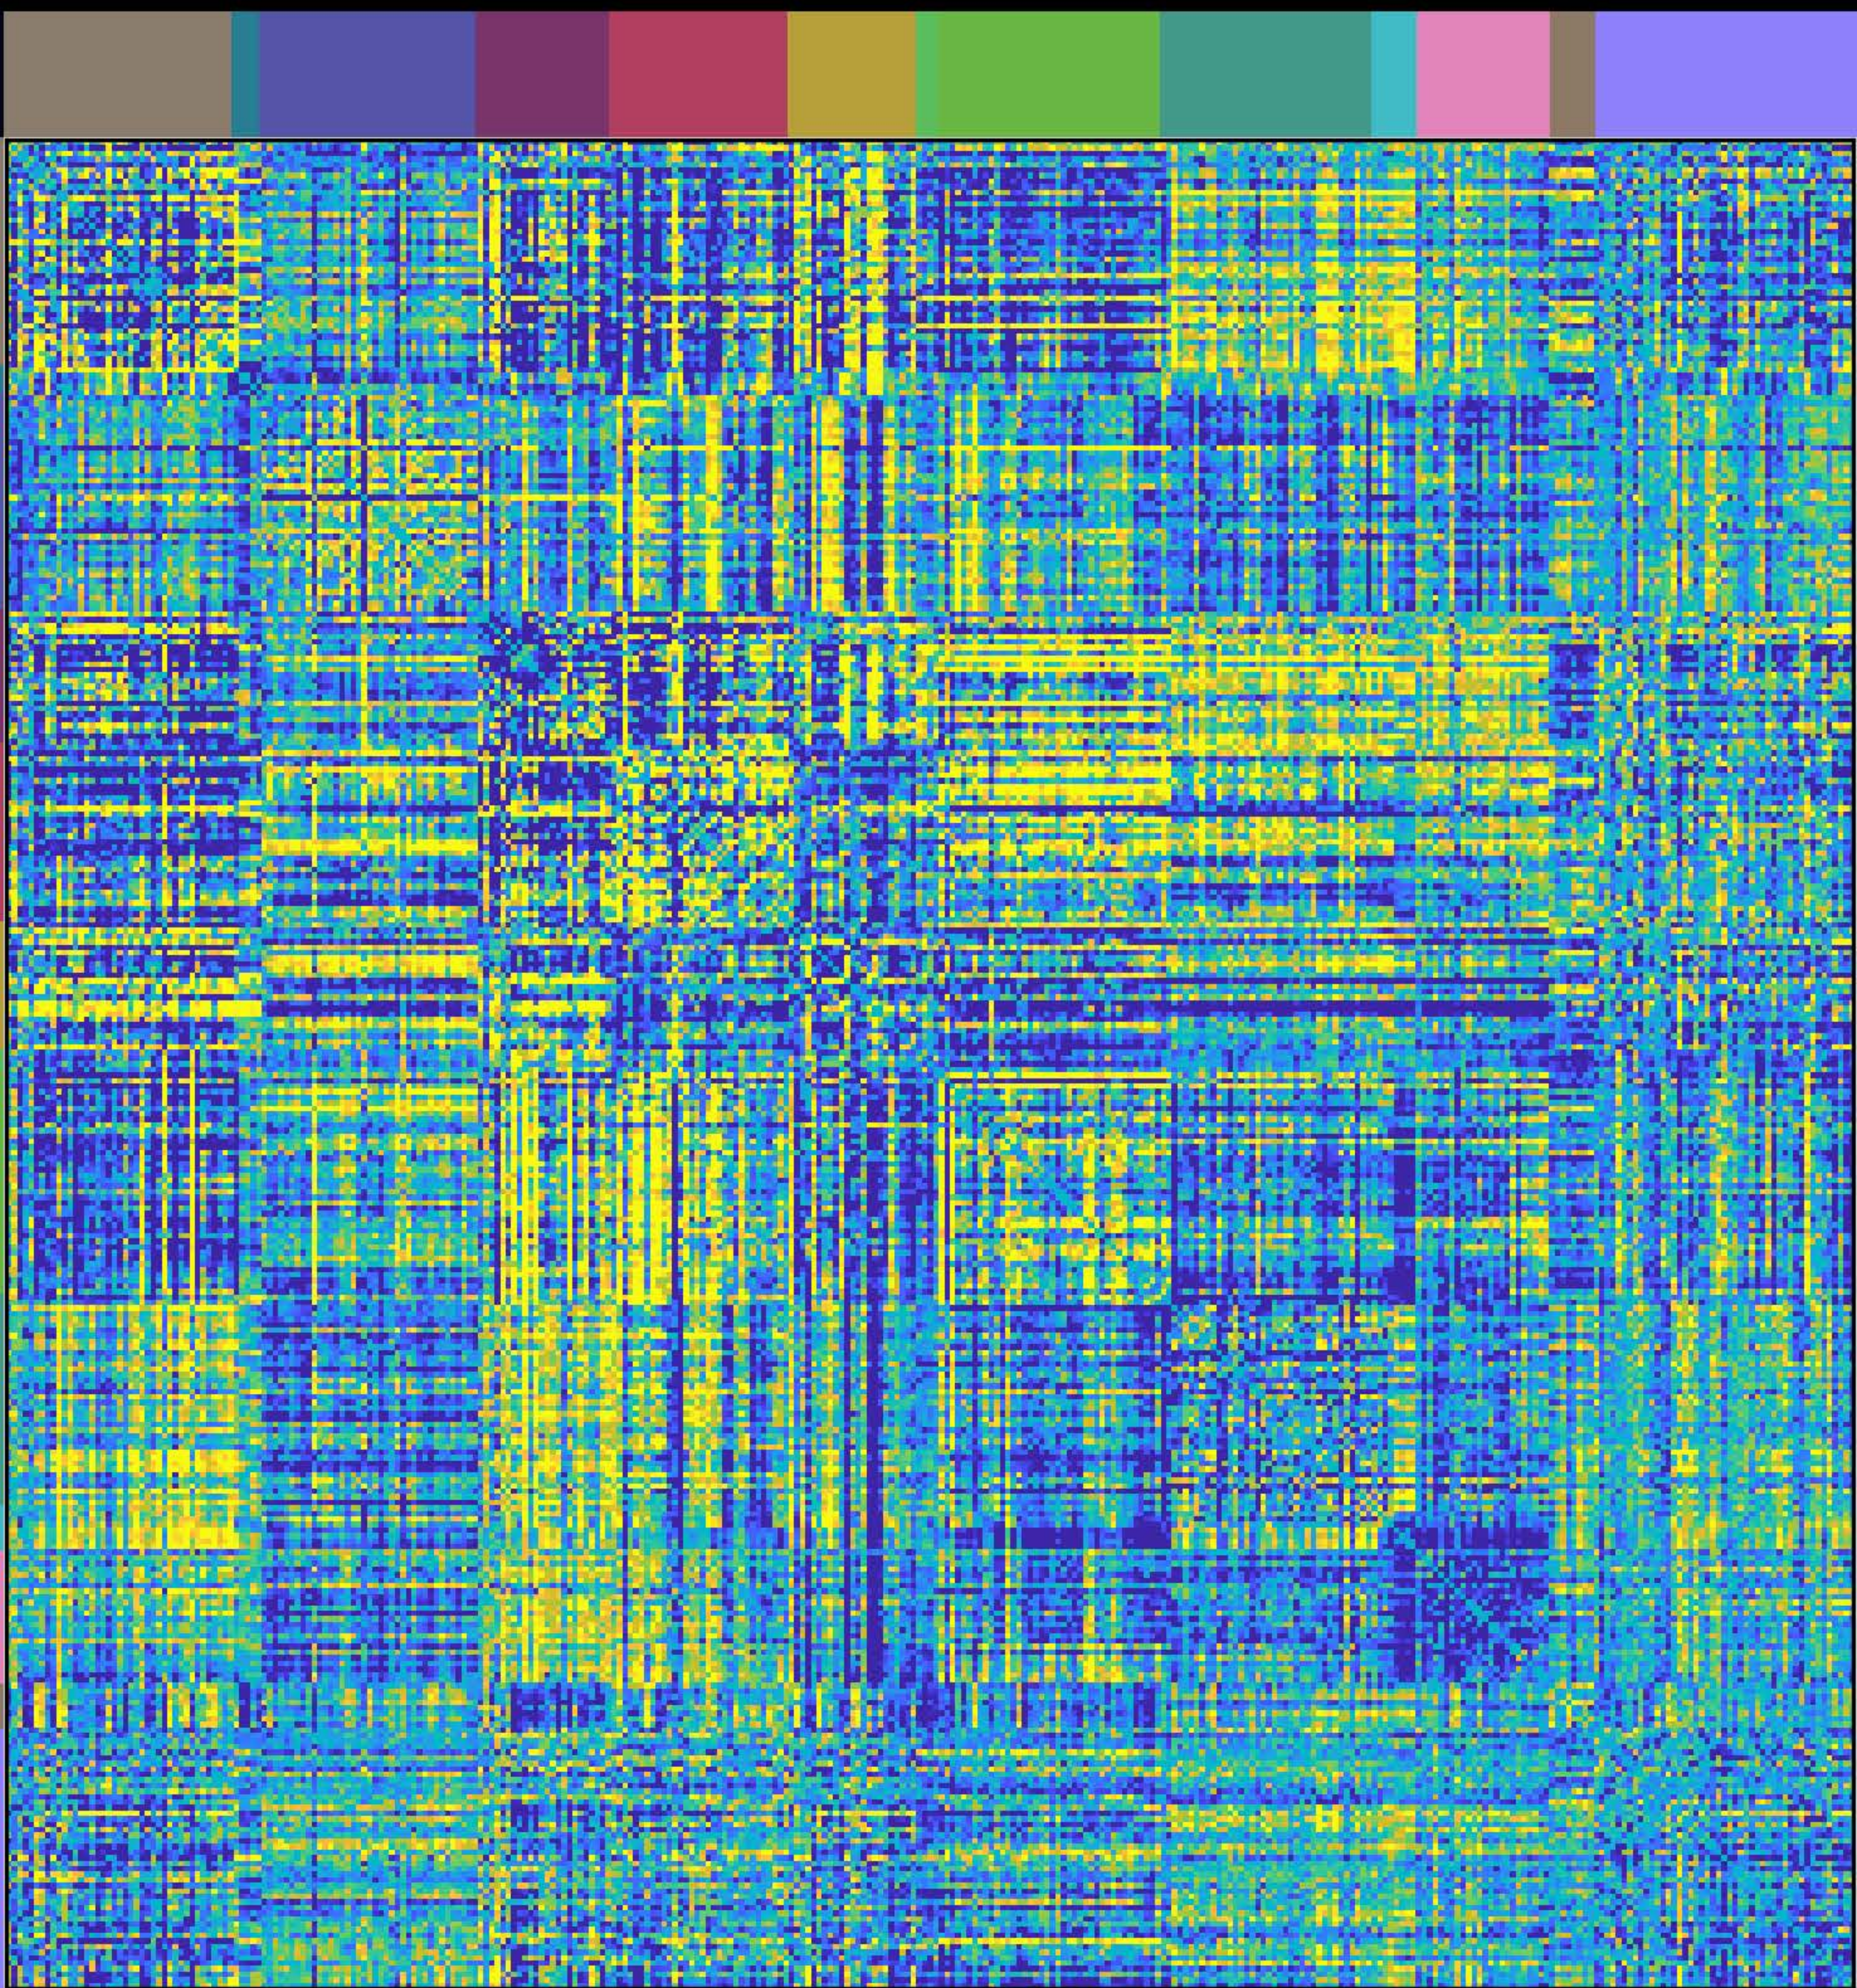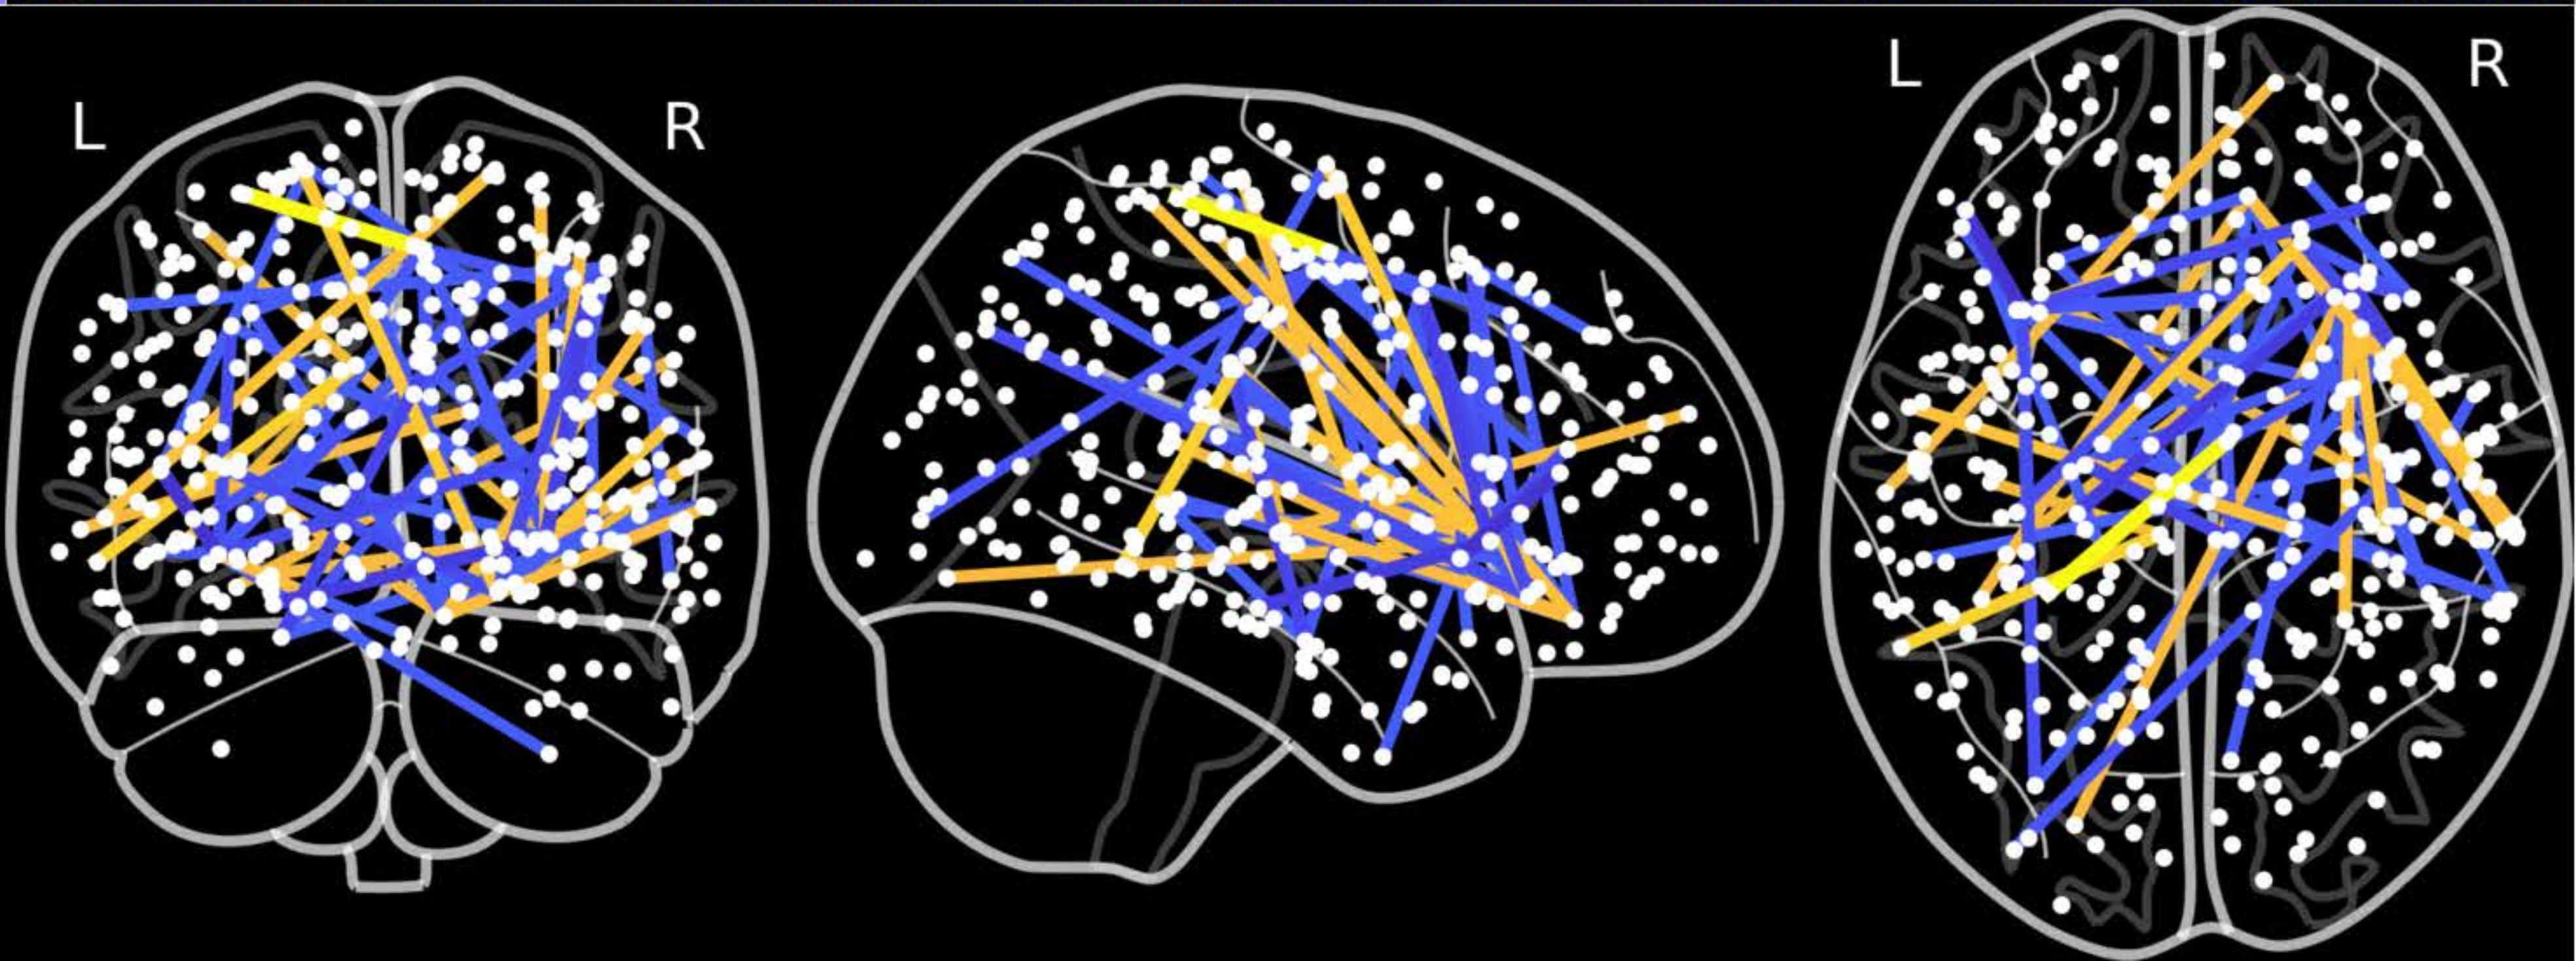



component\_3

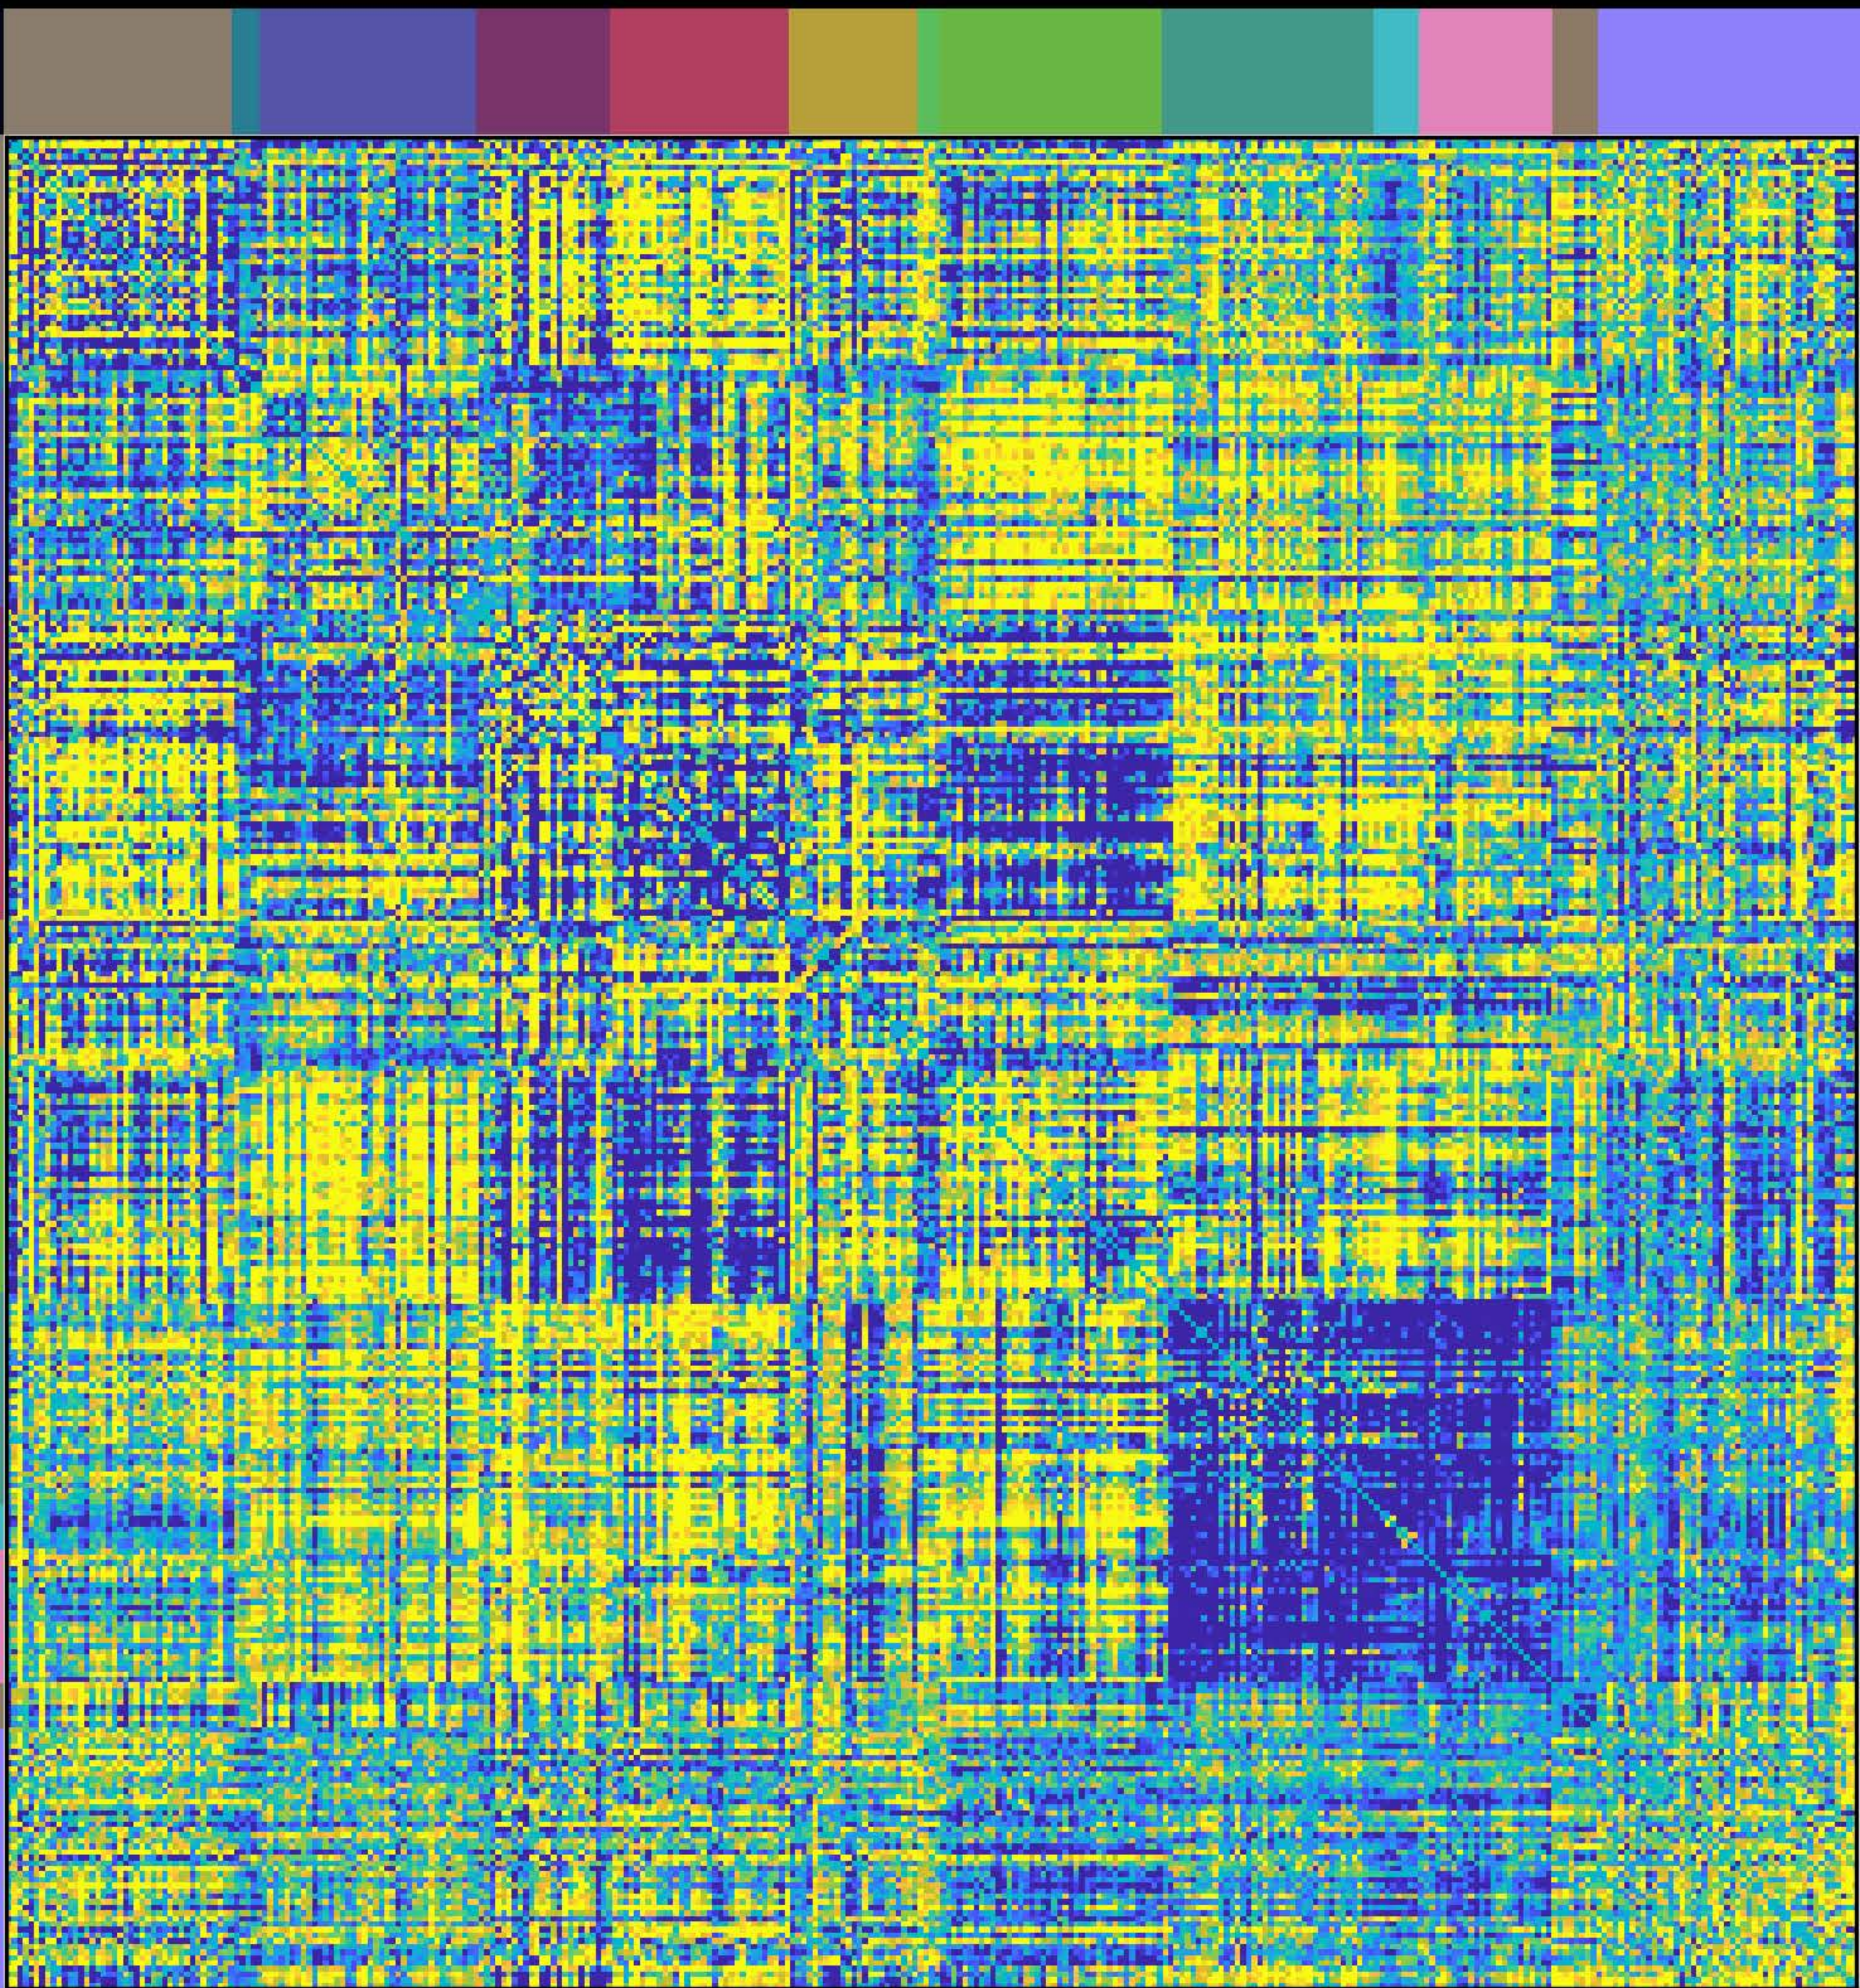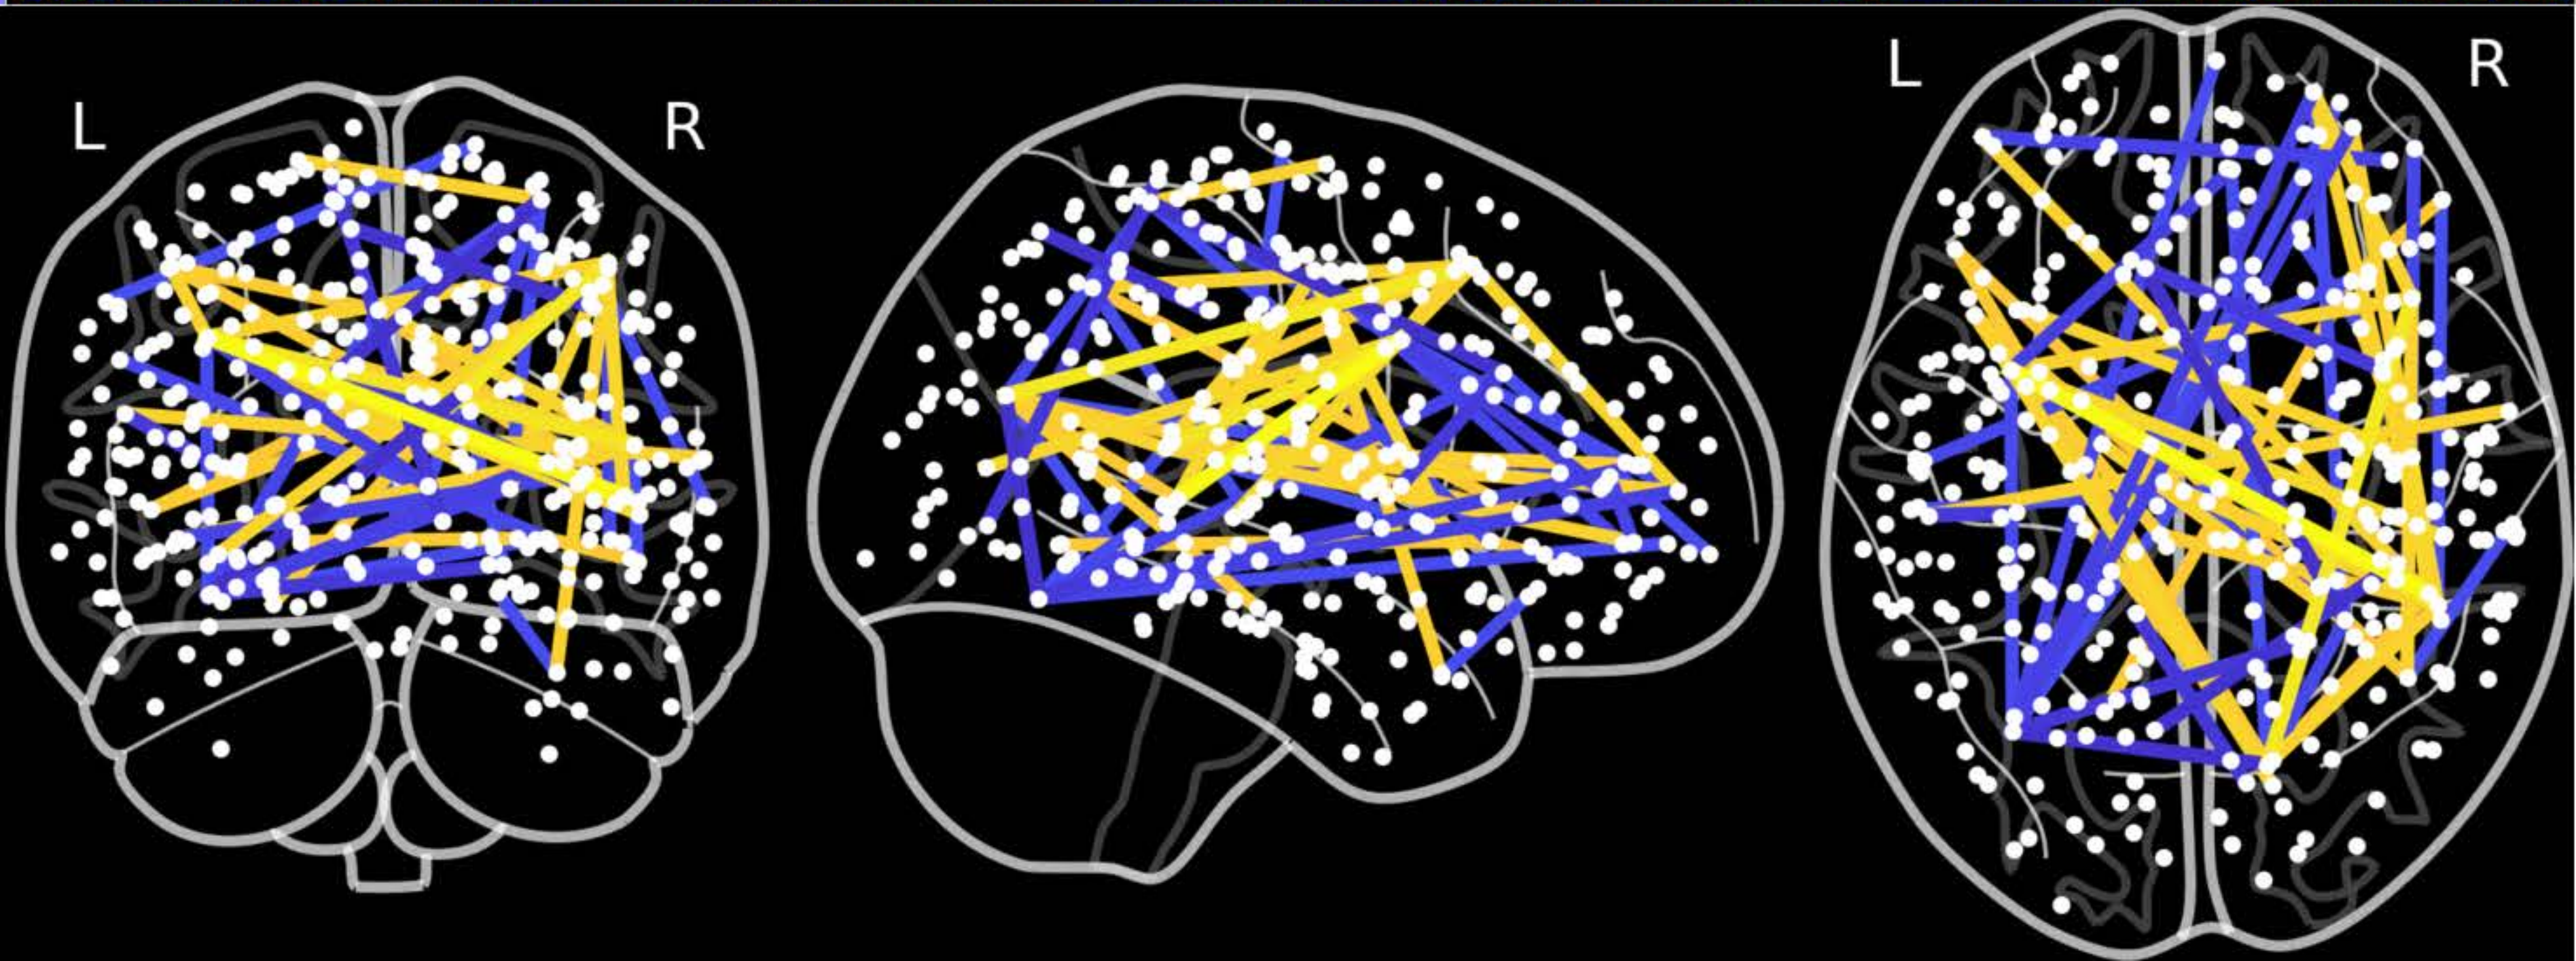



component\_4

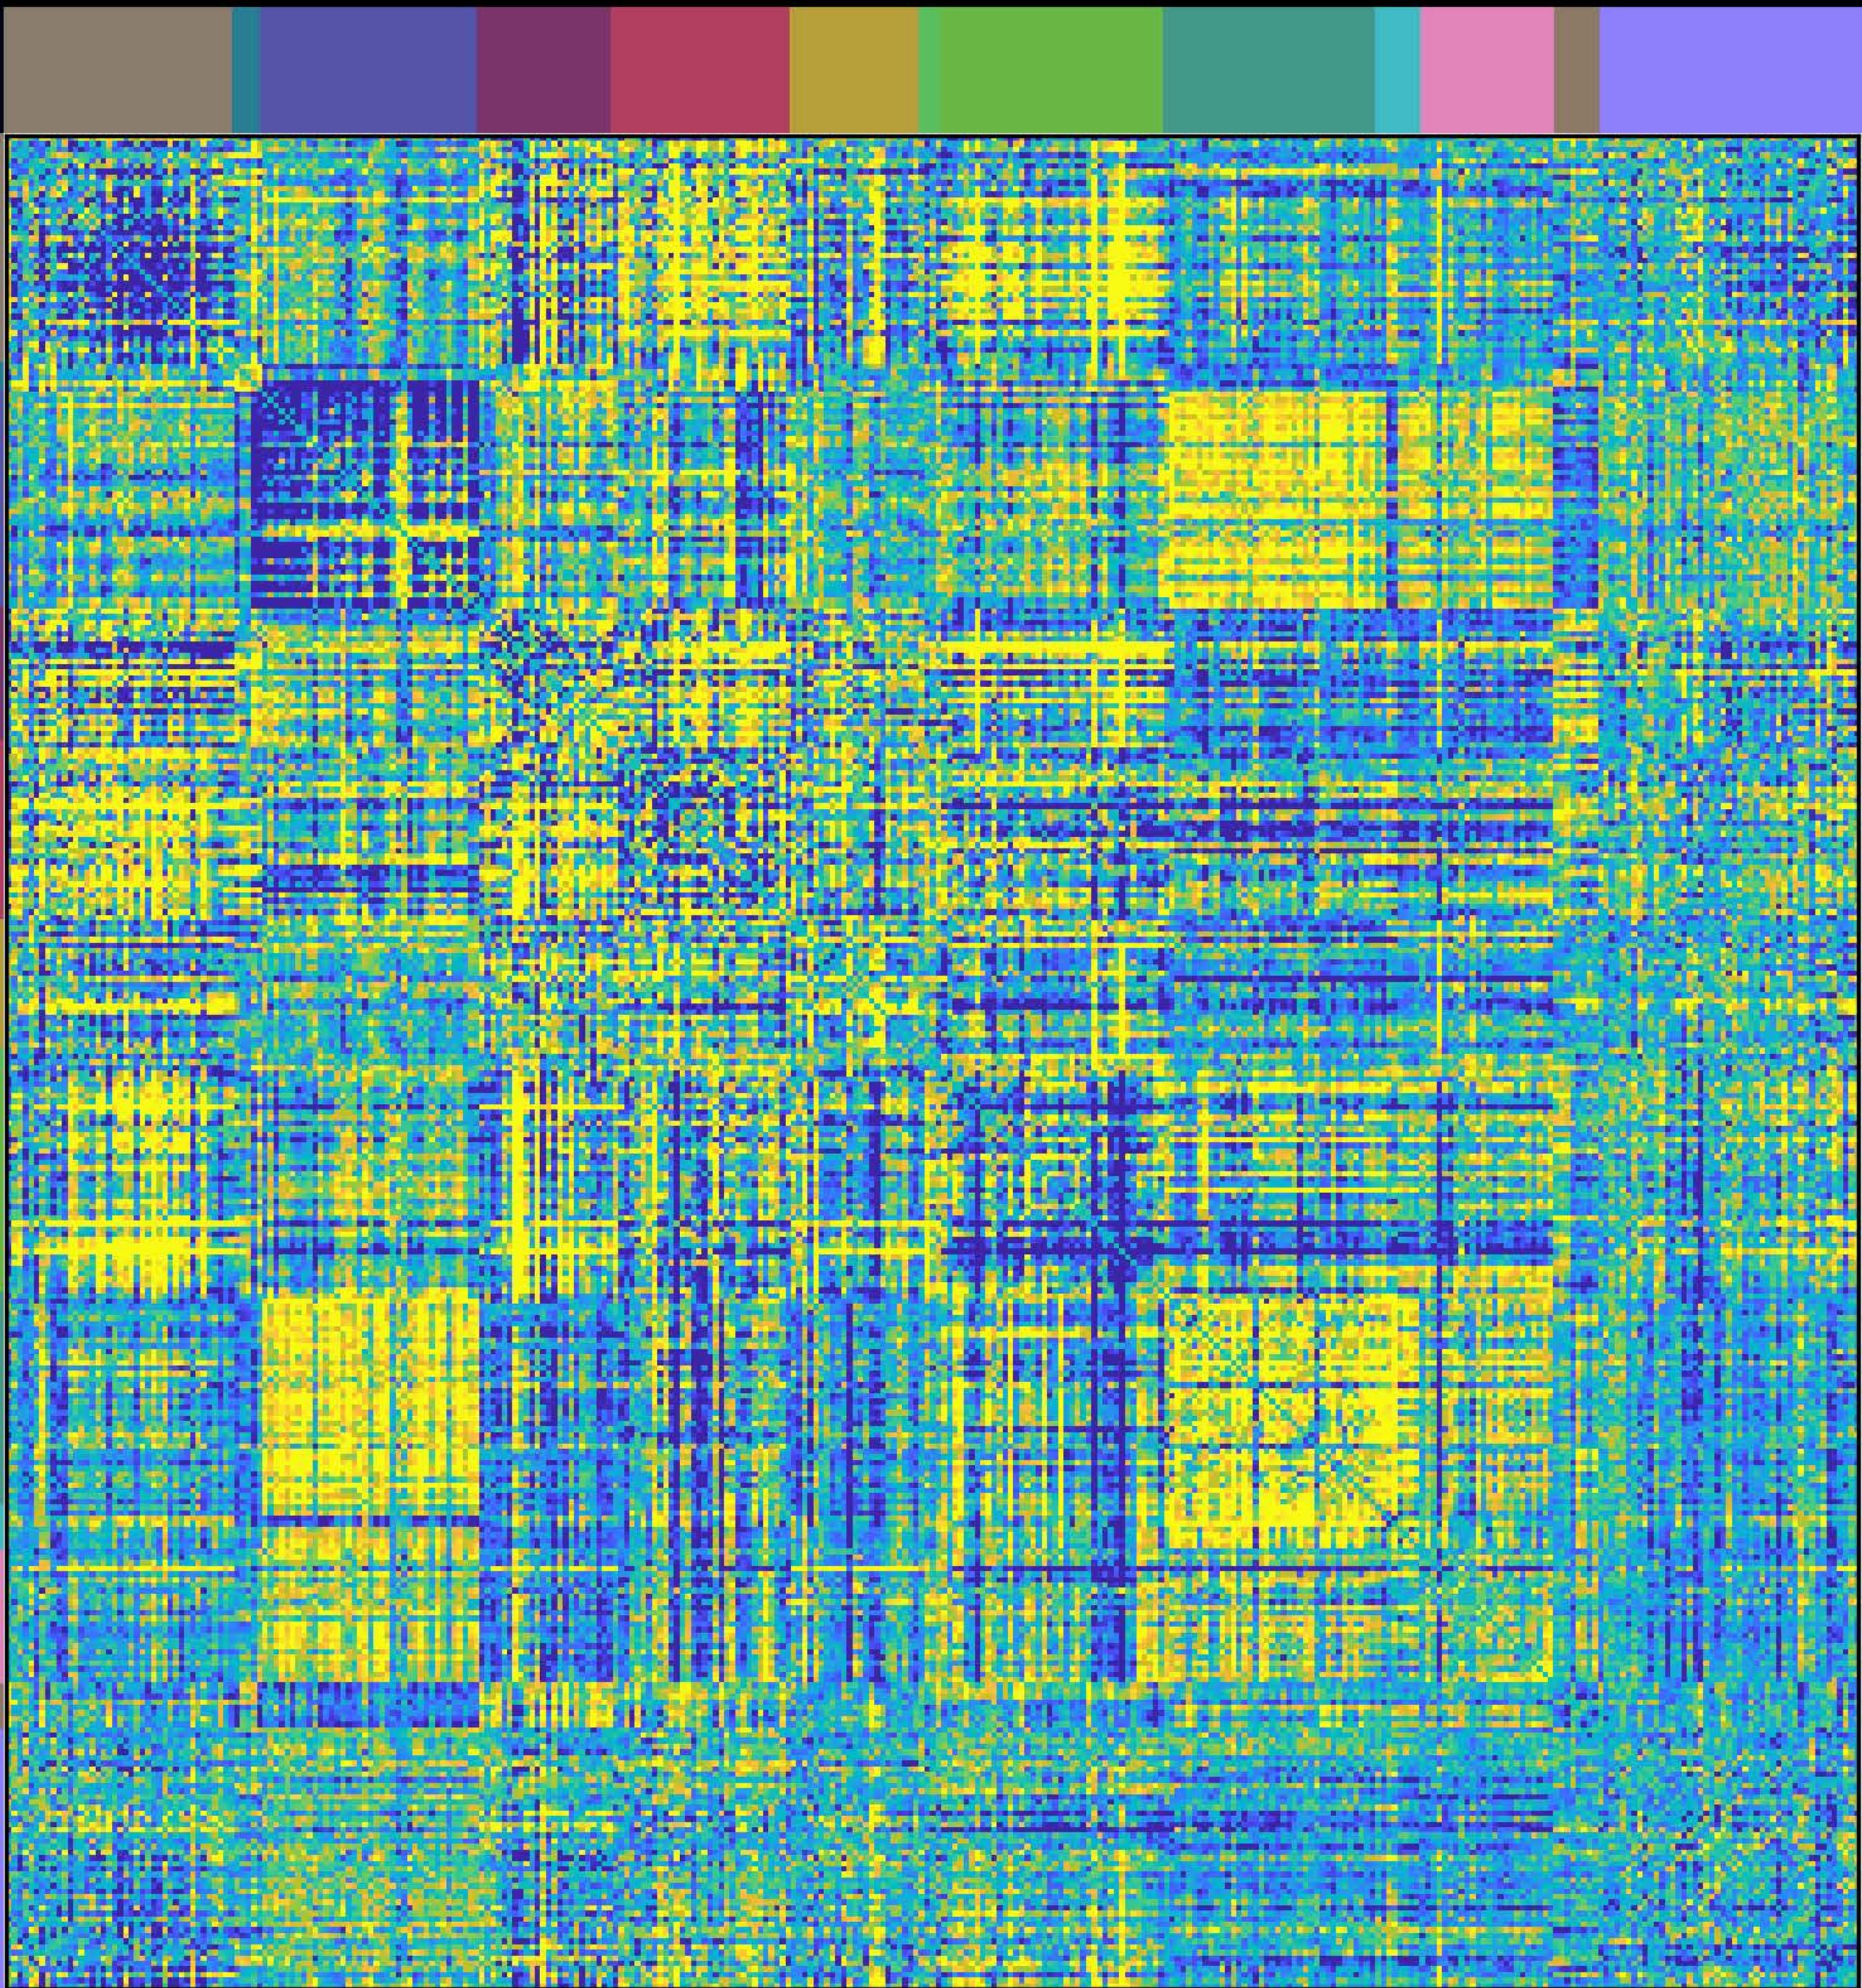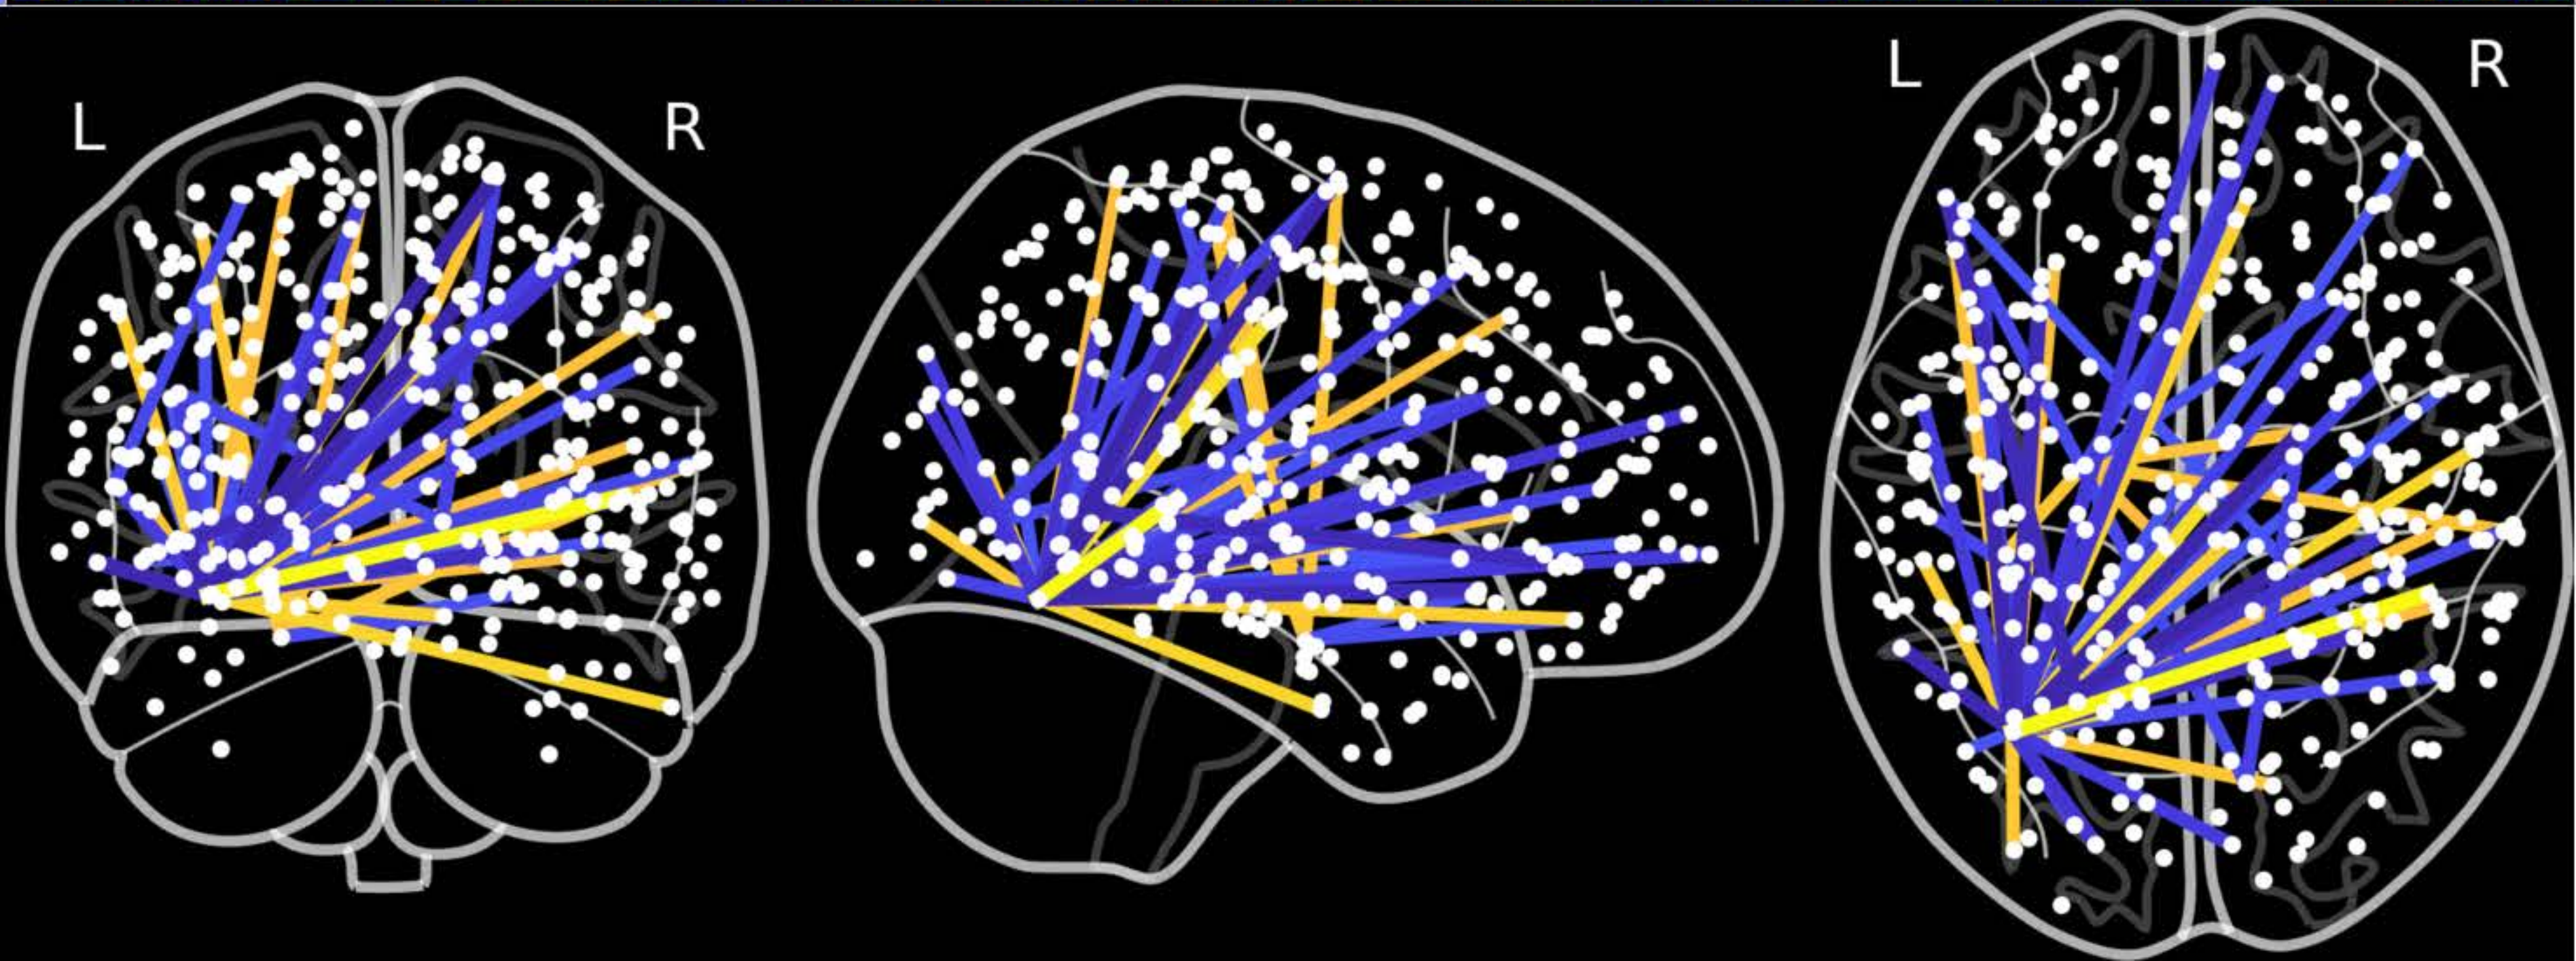



component\_5

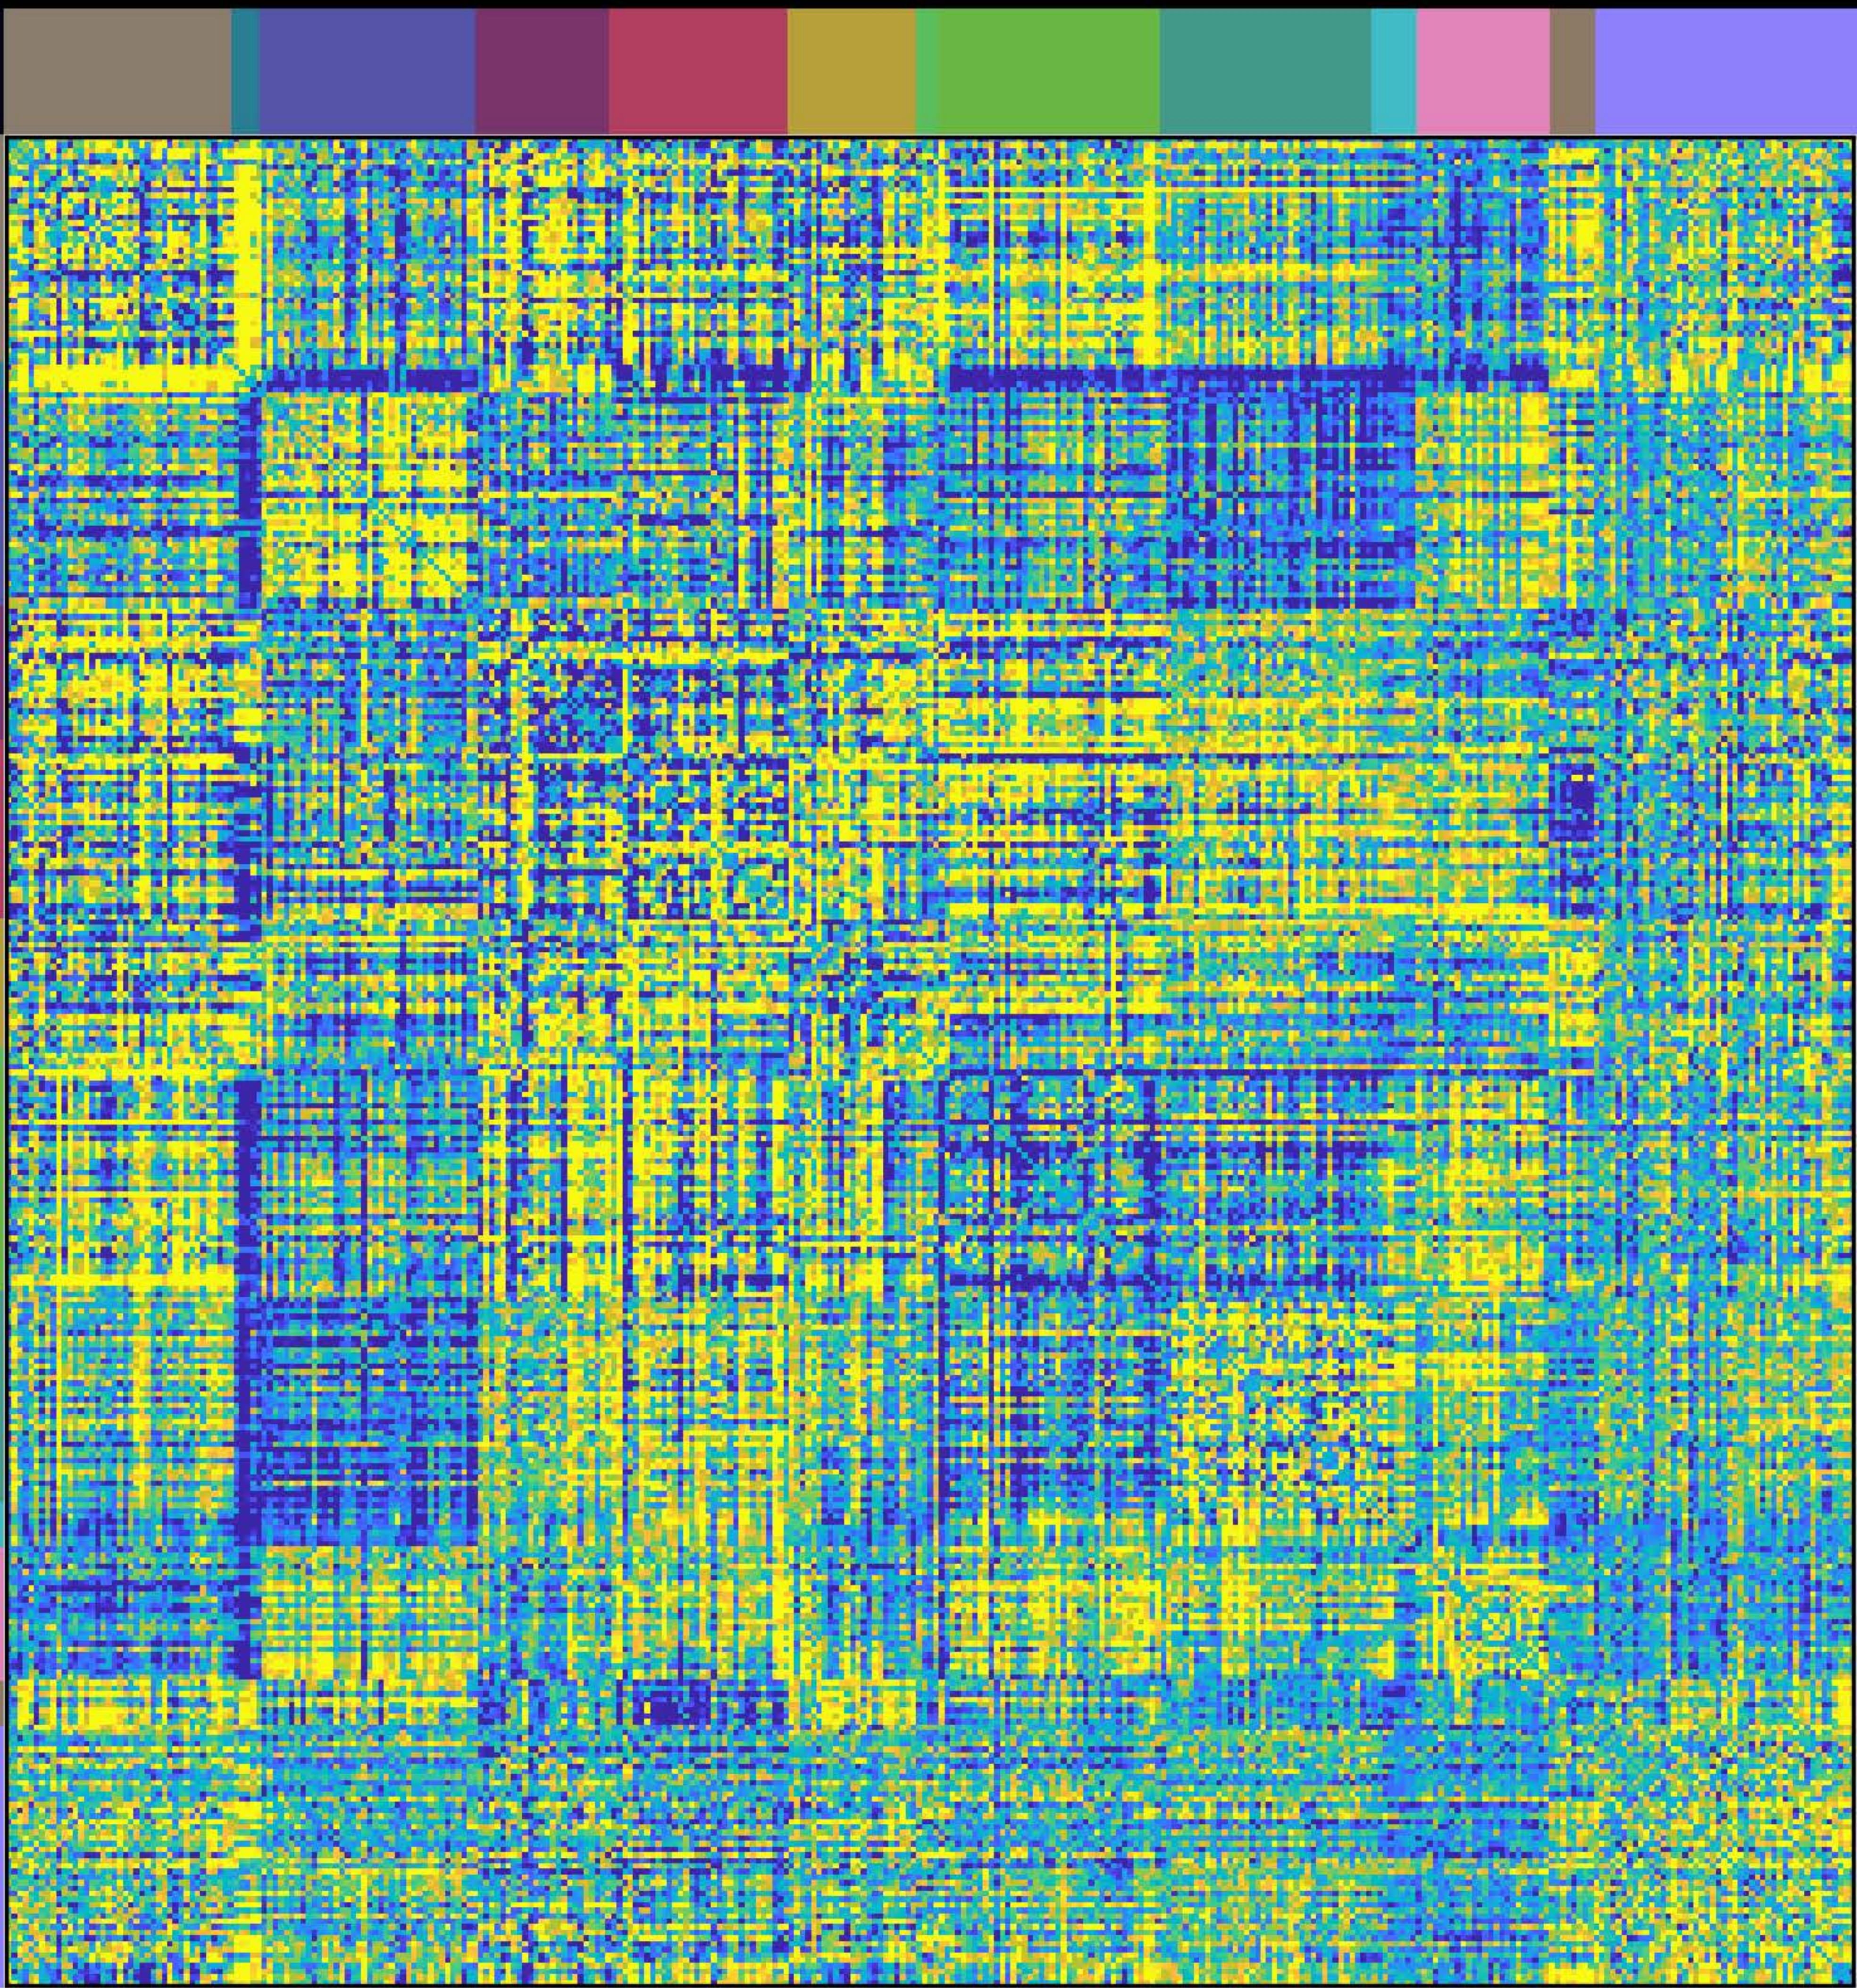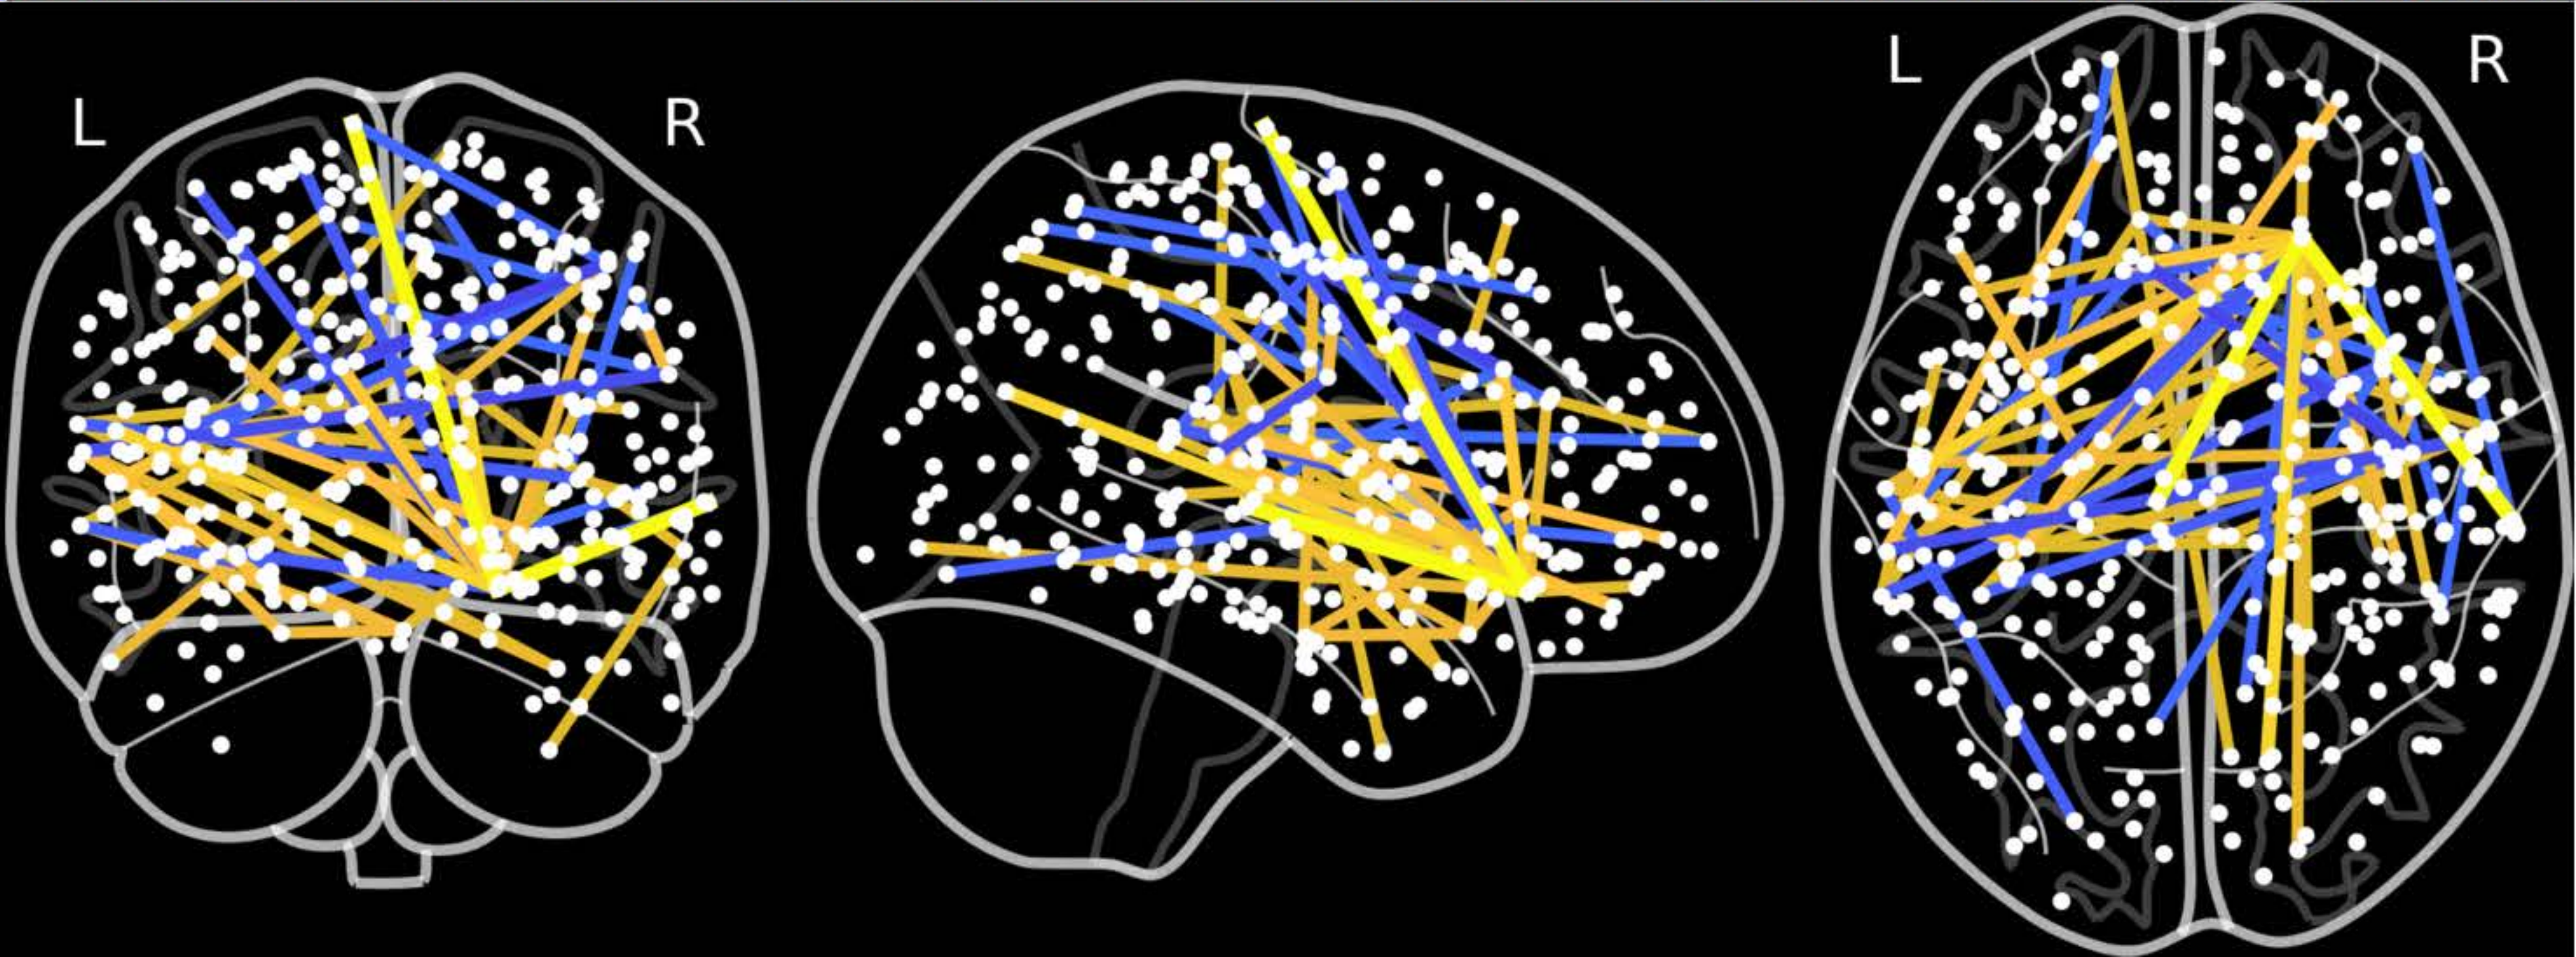



component\_6

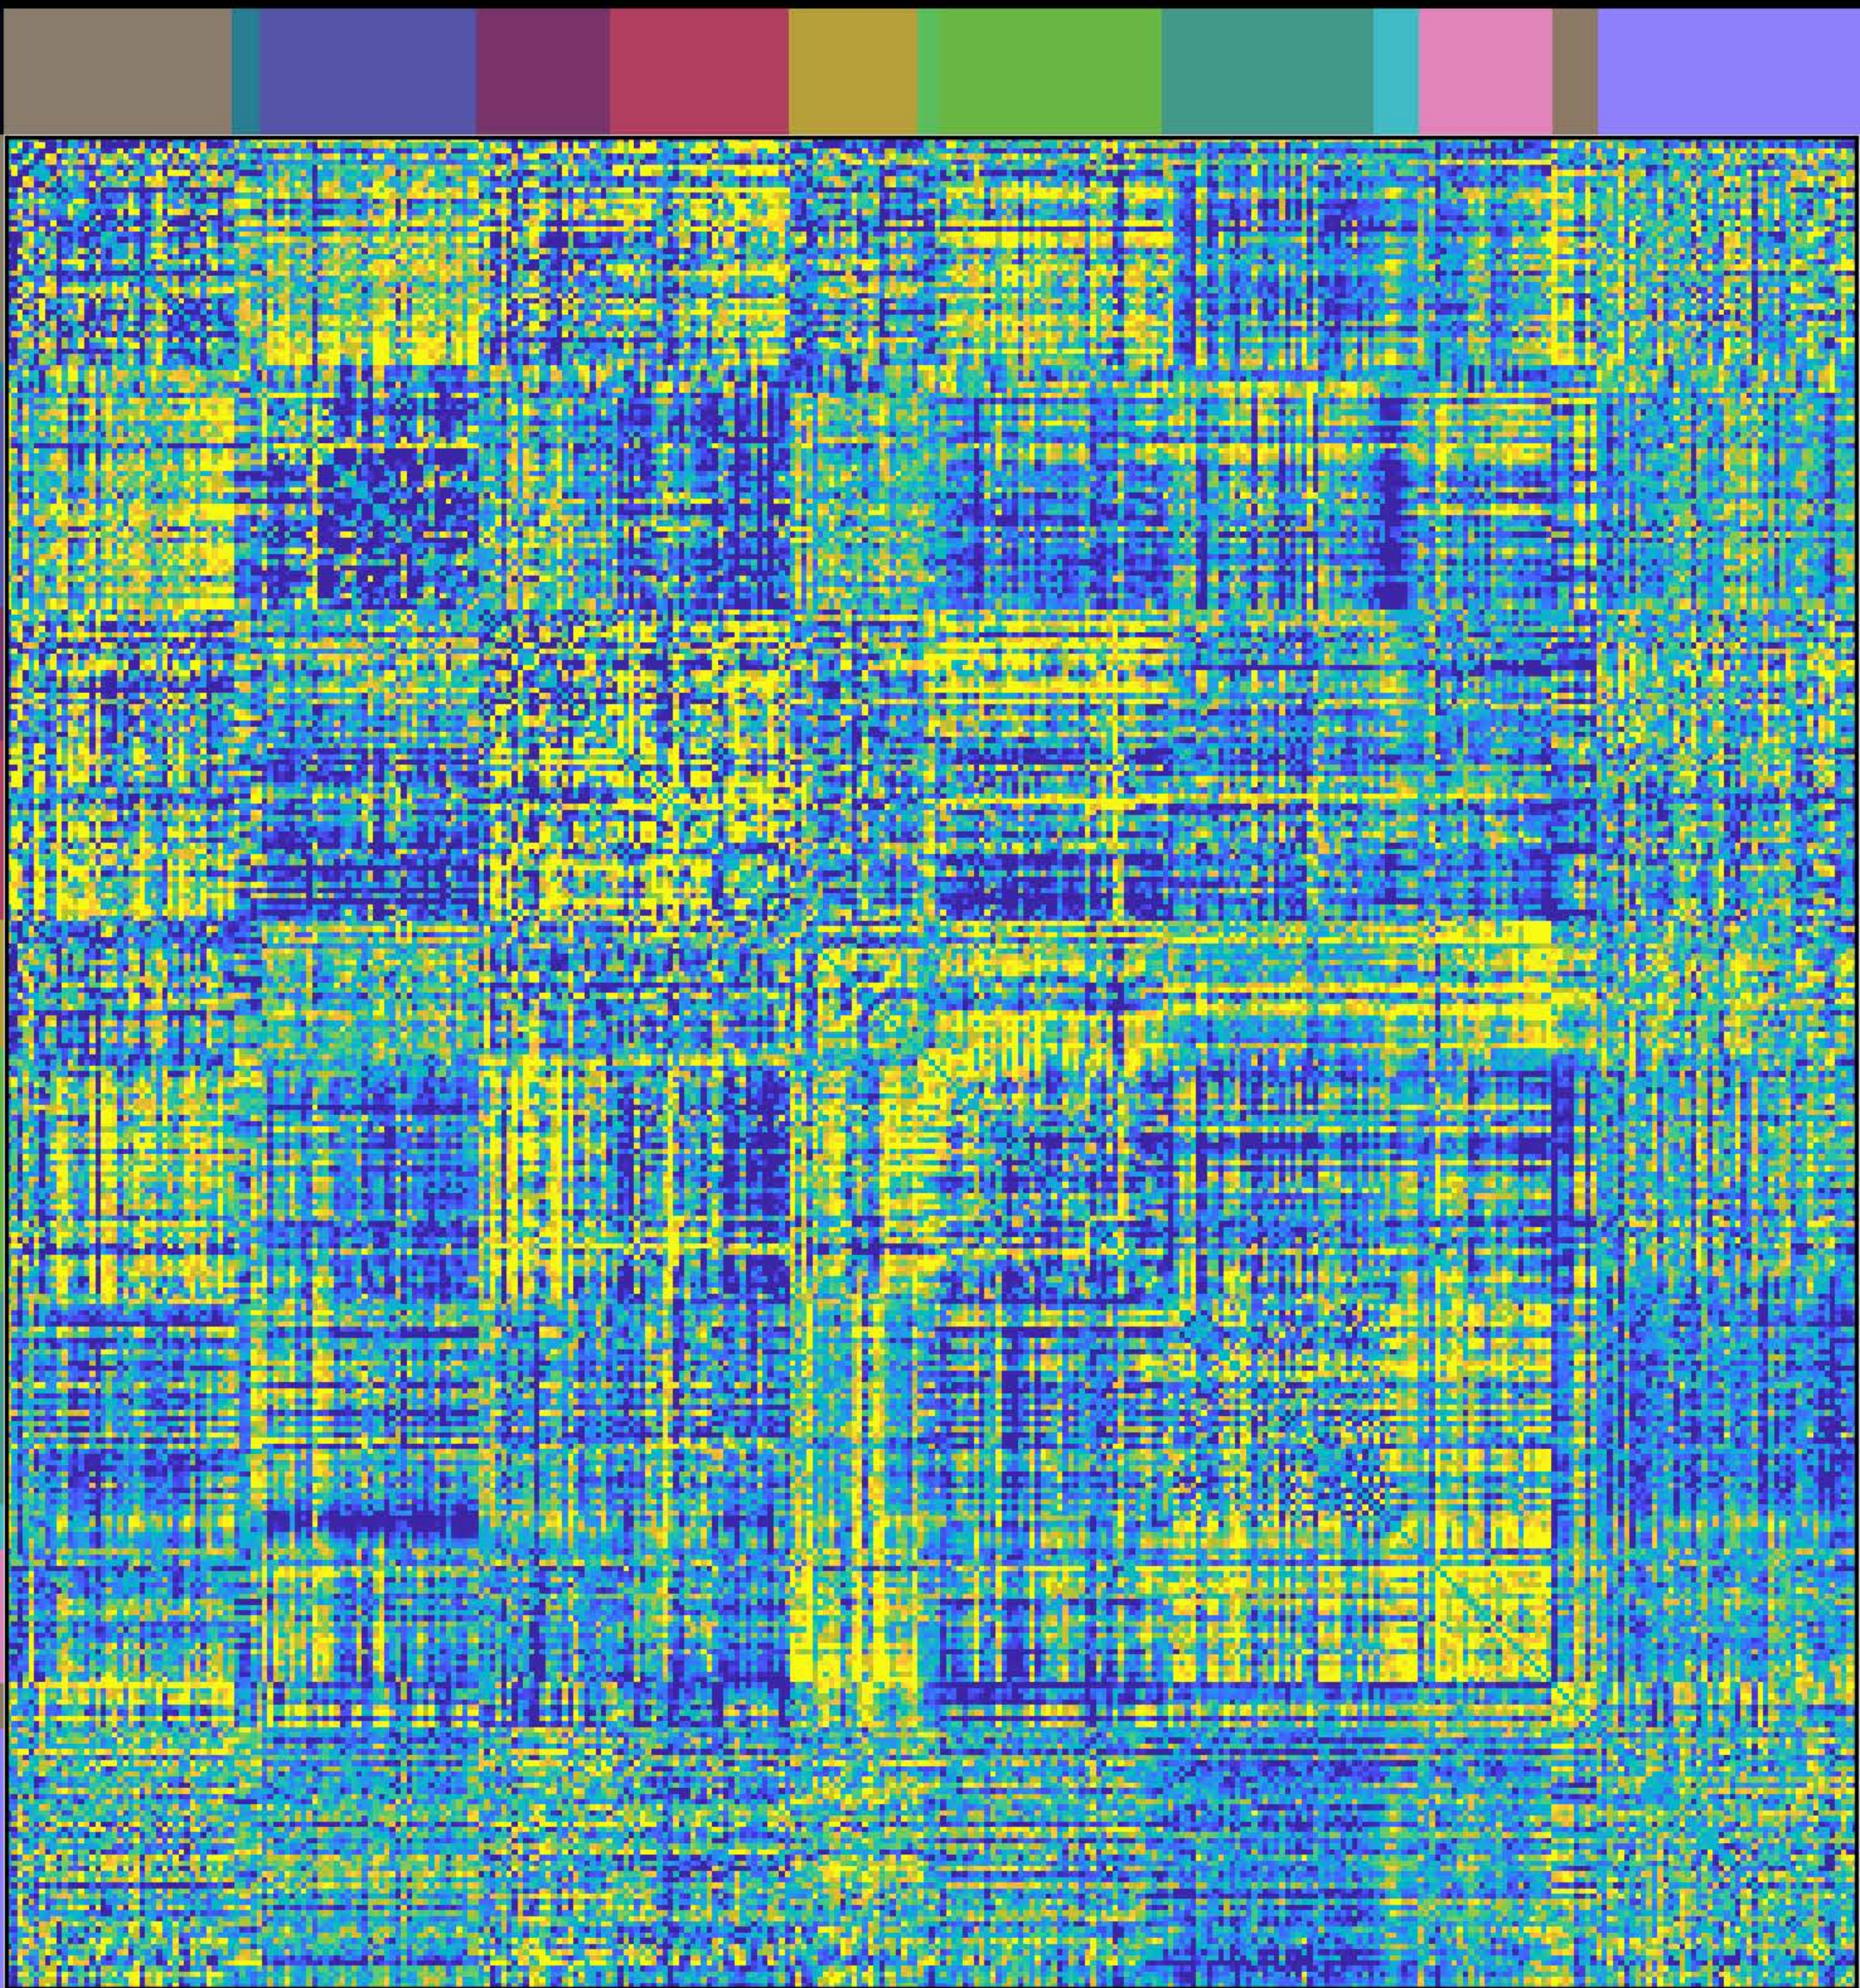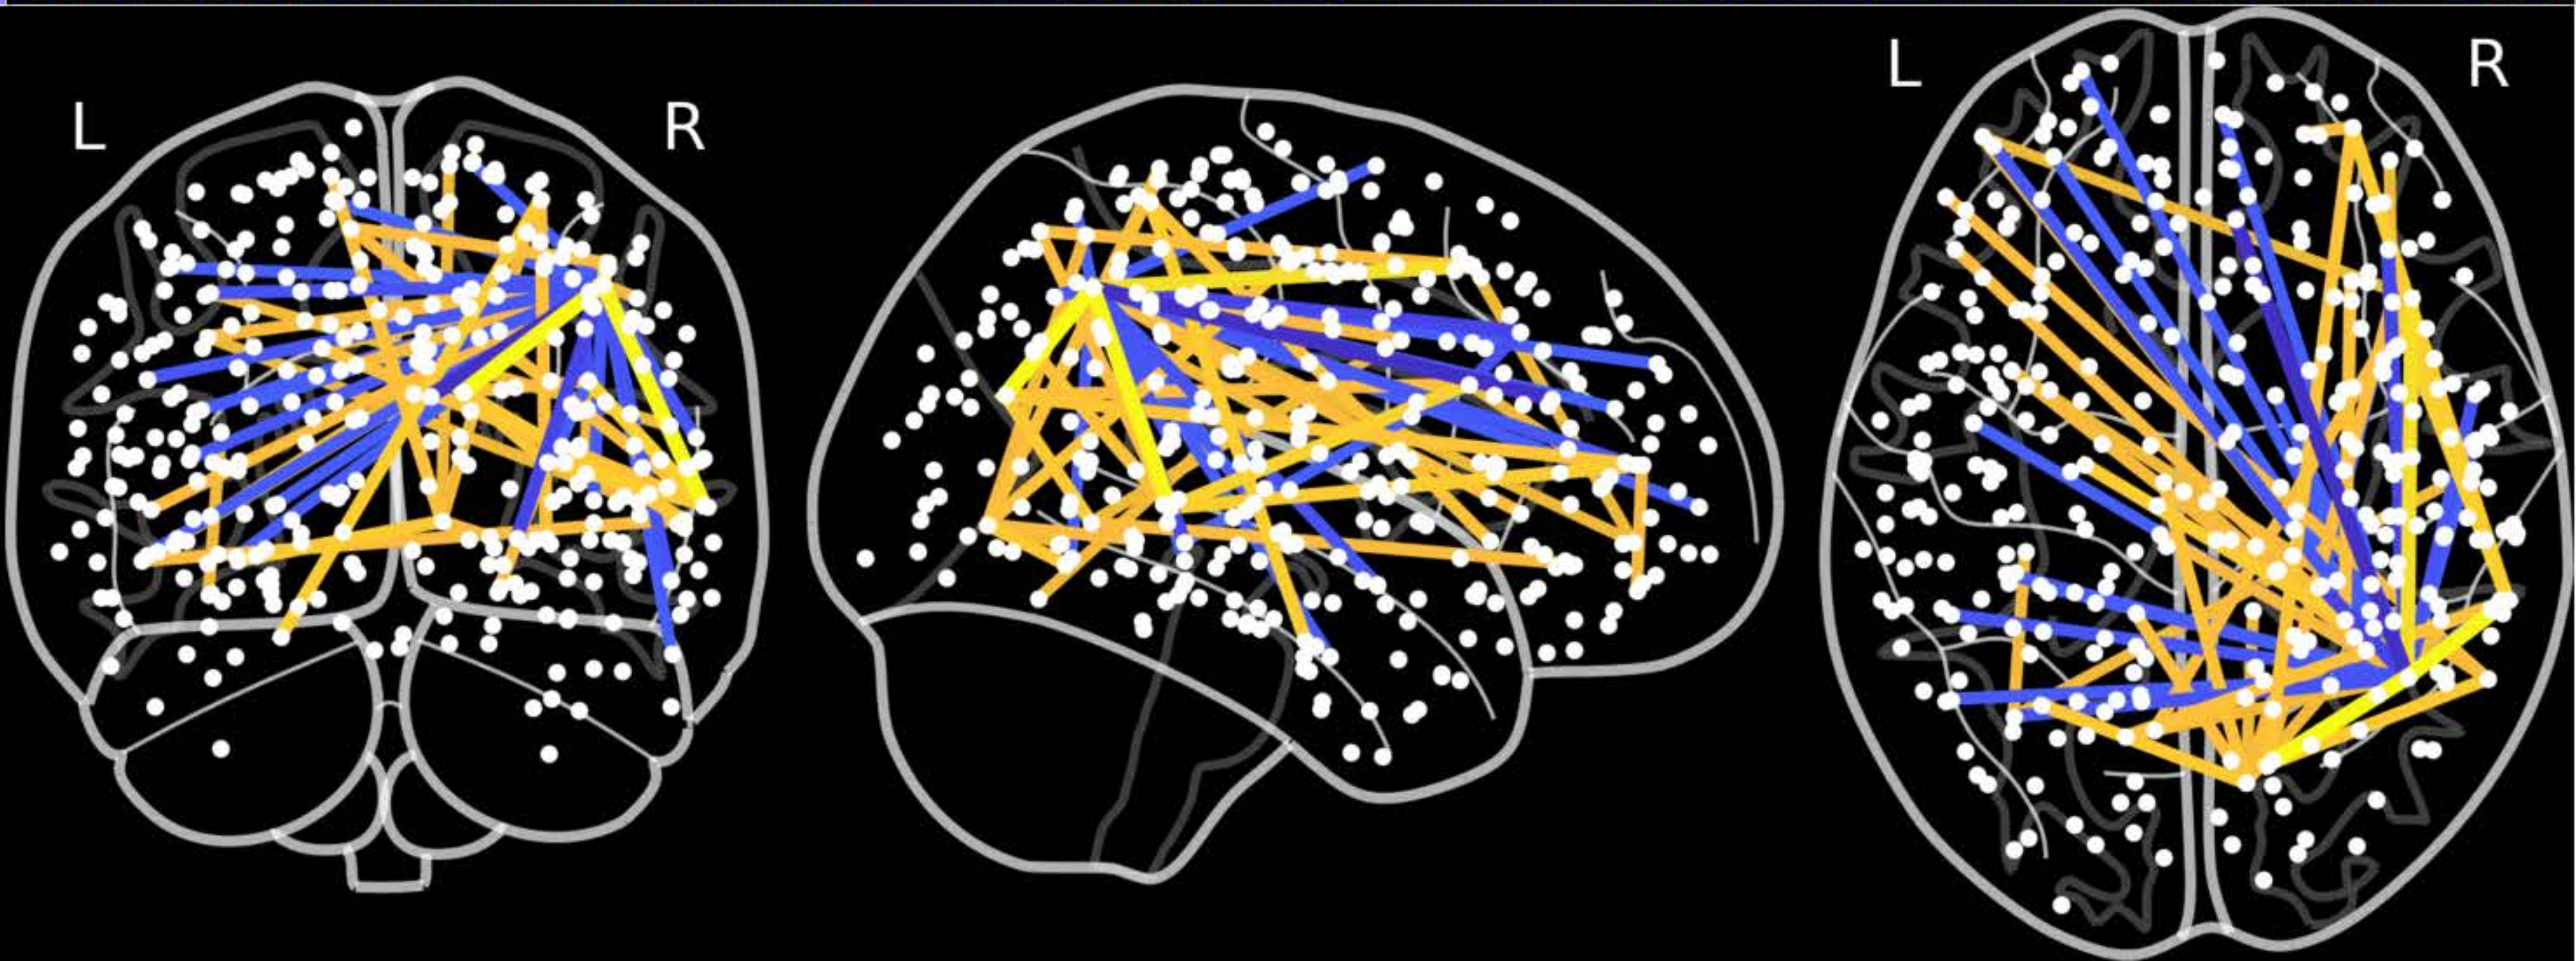



component\_7

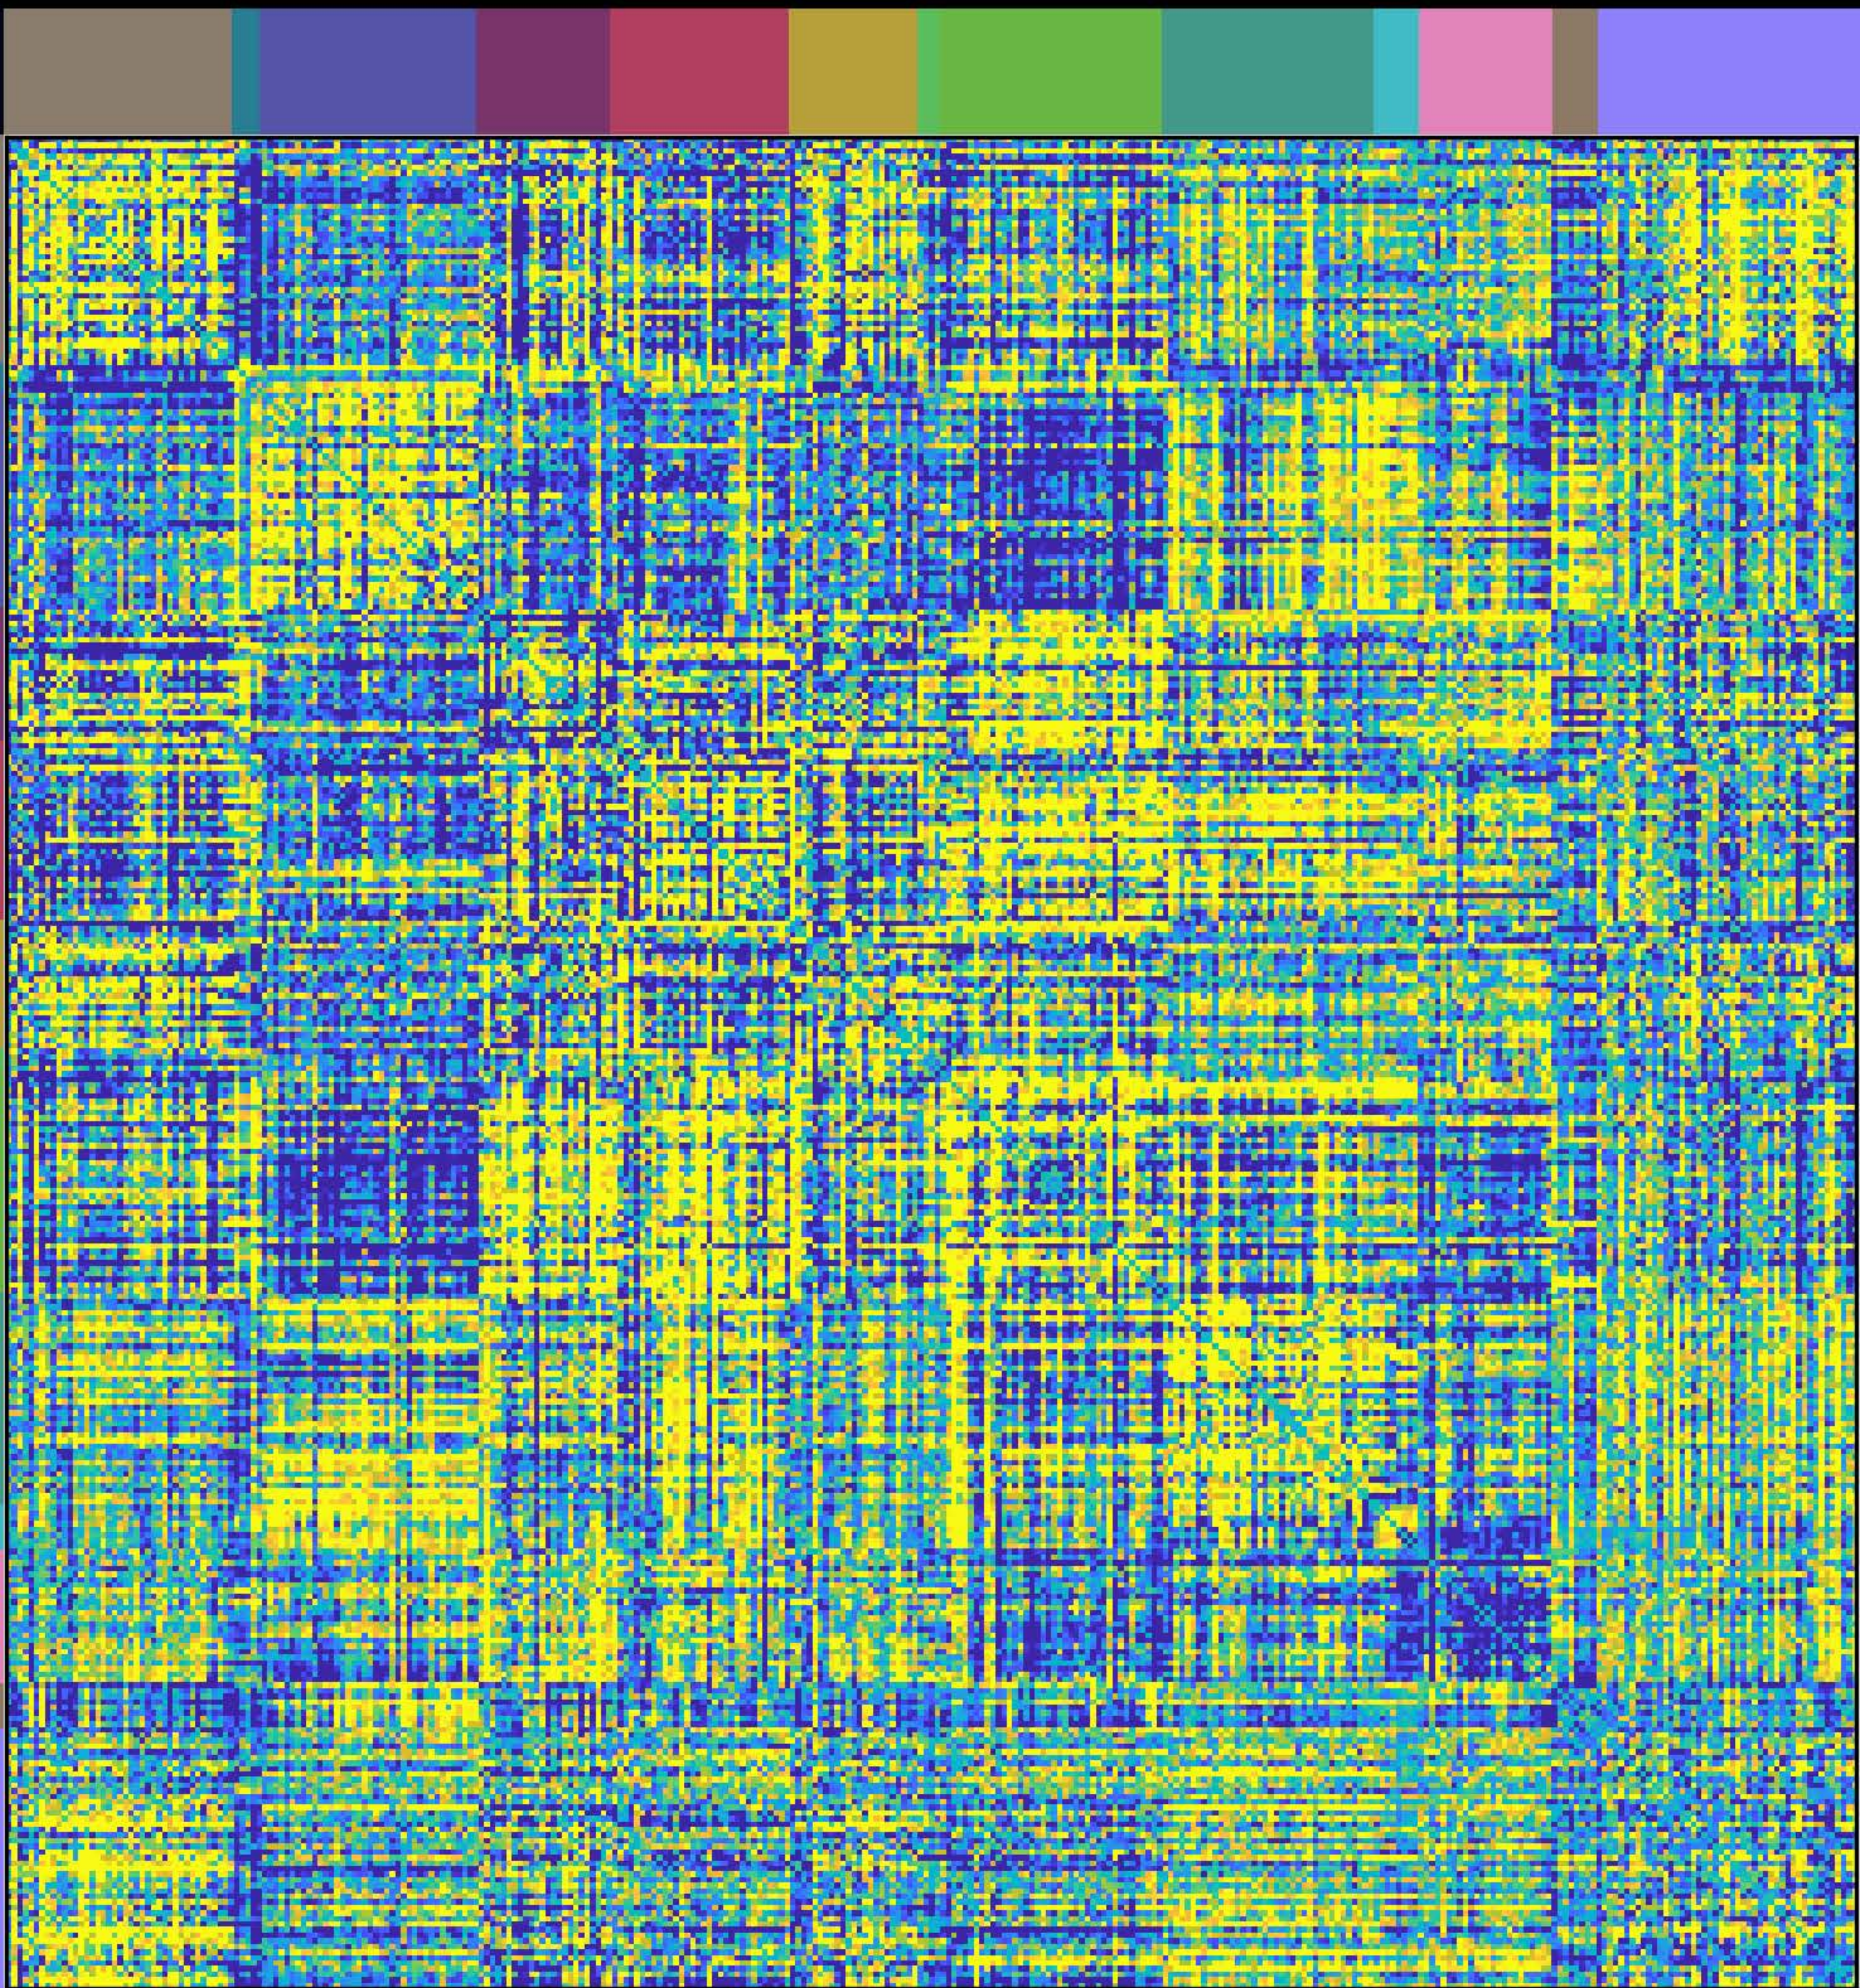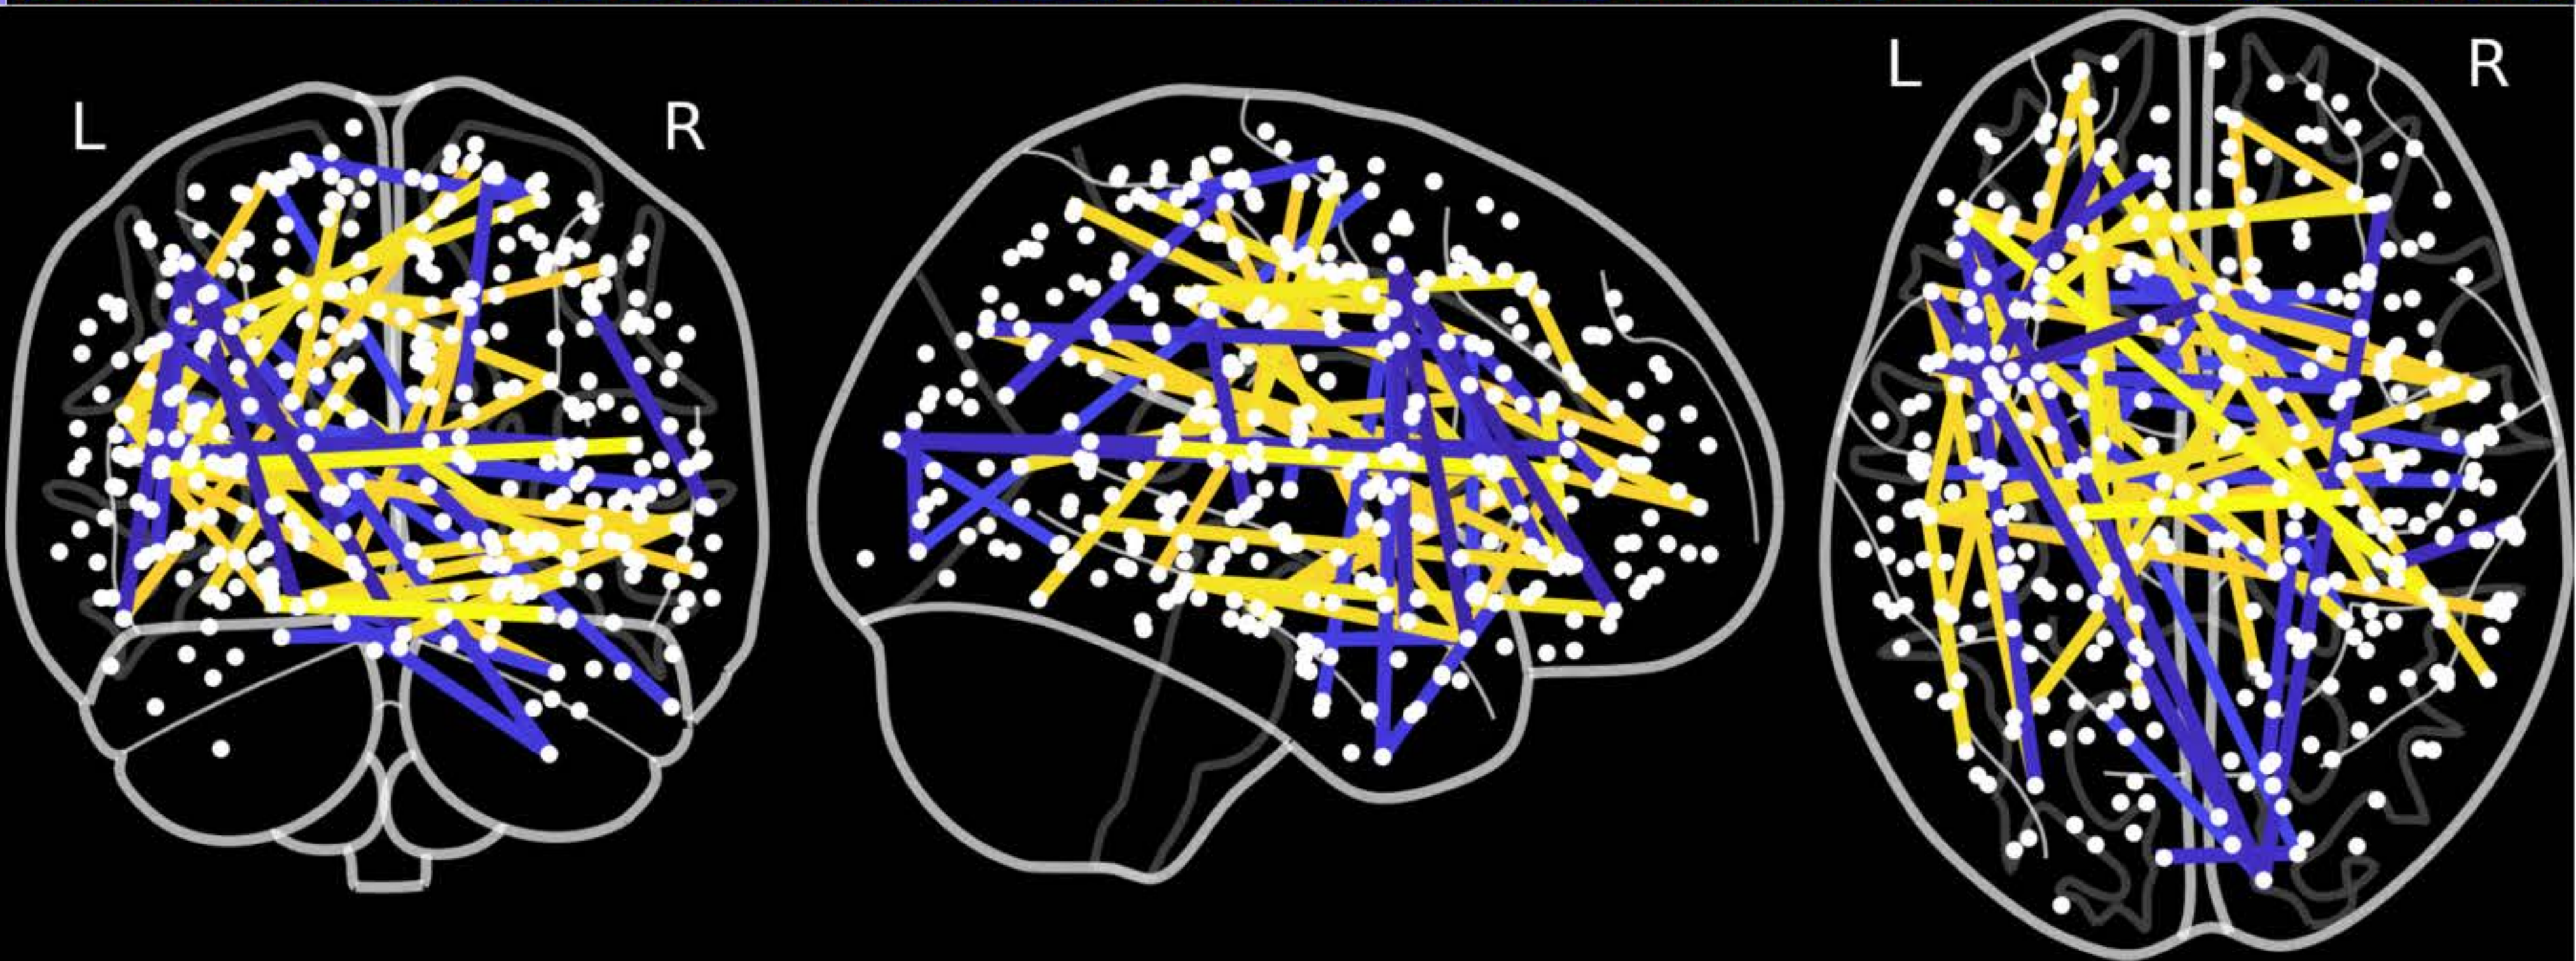



component\_8

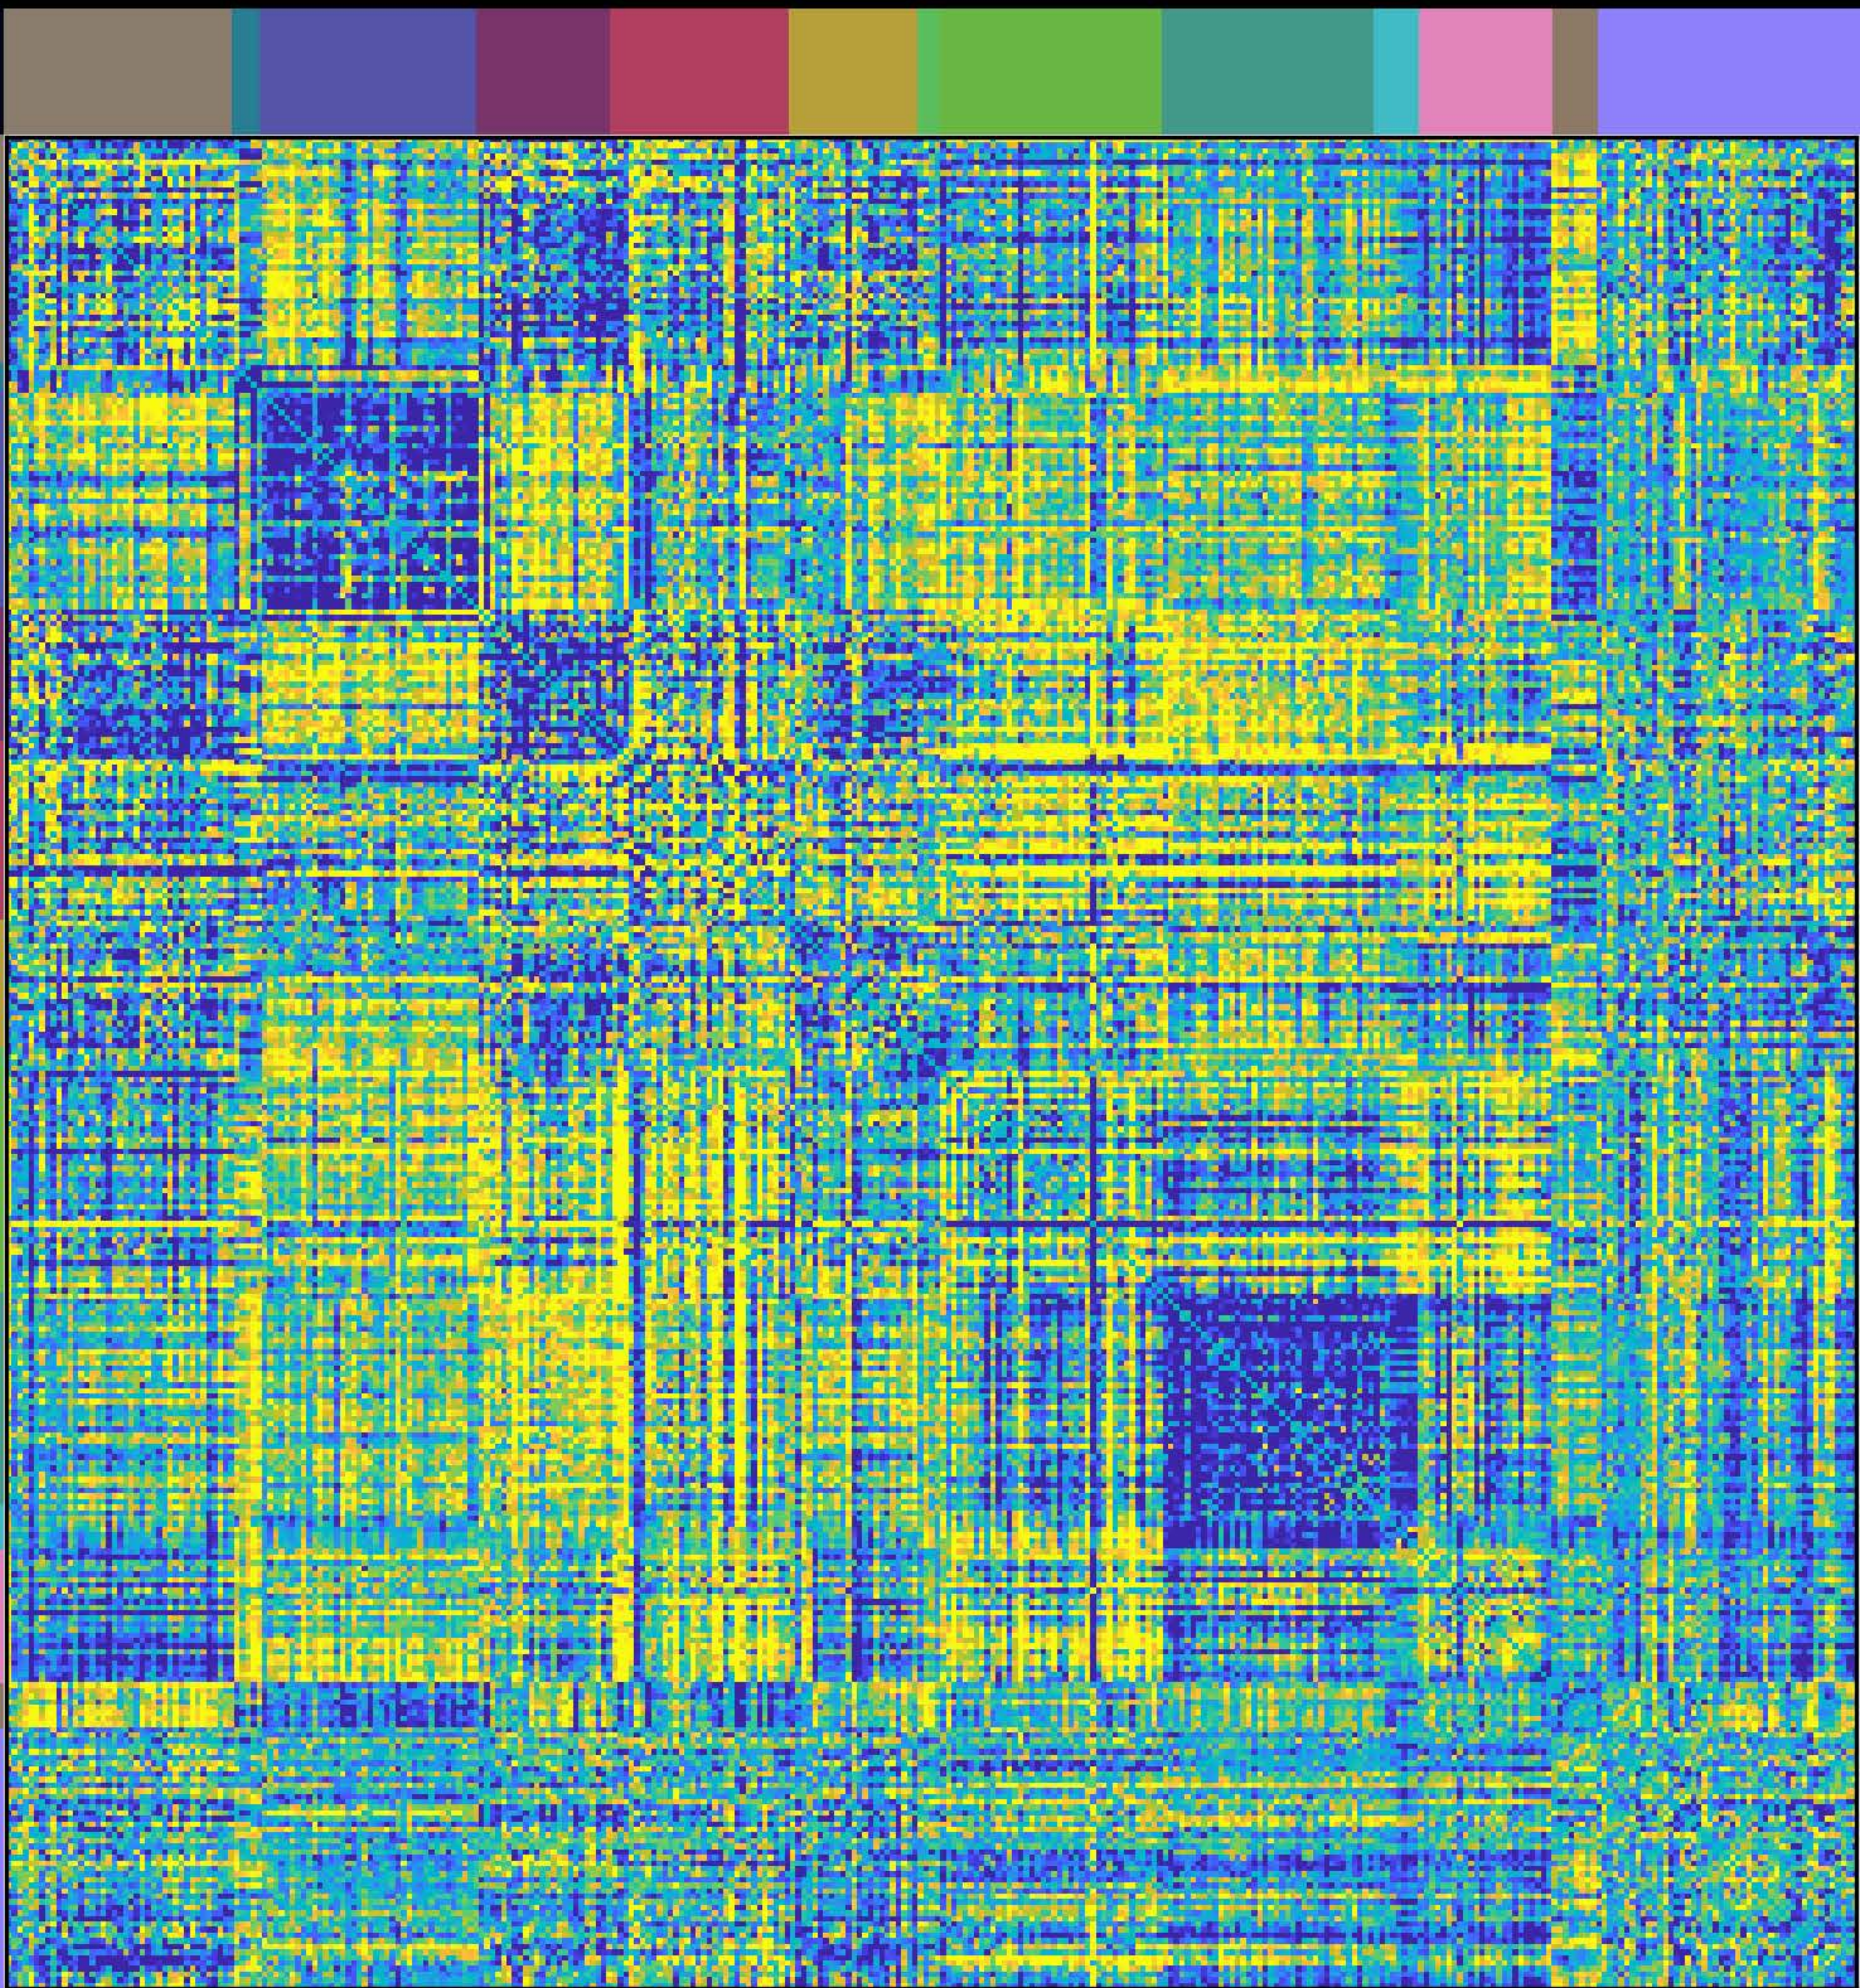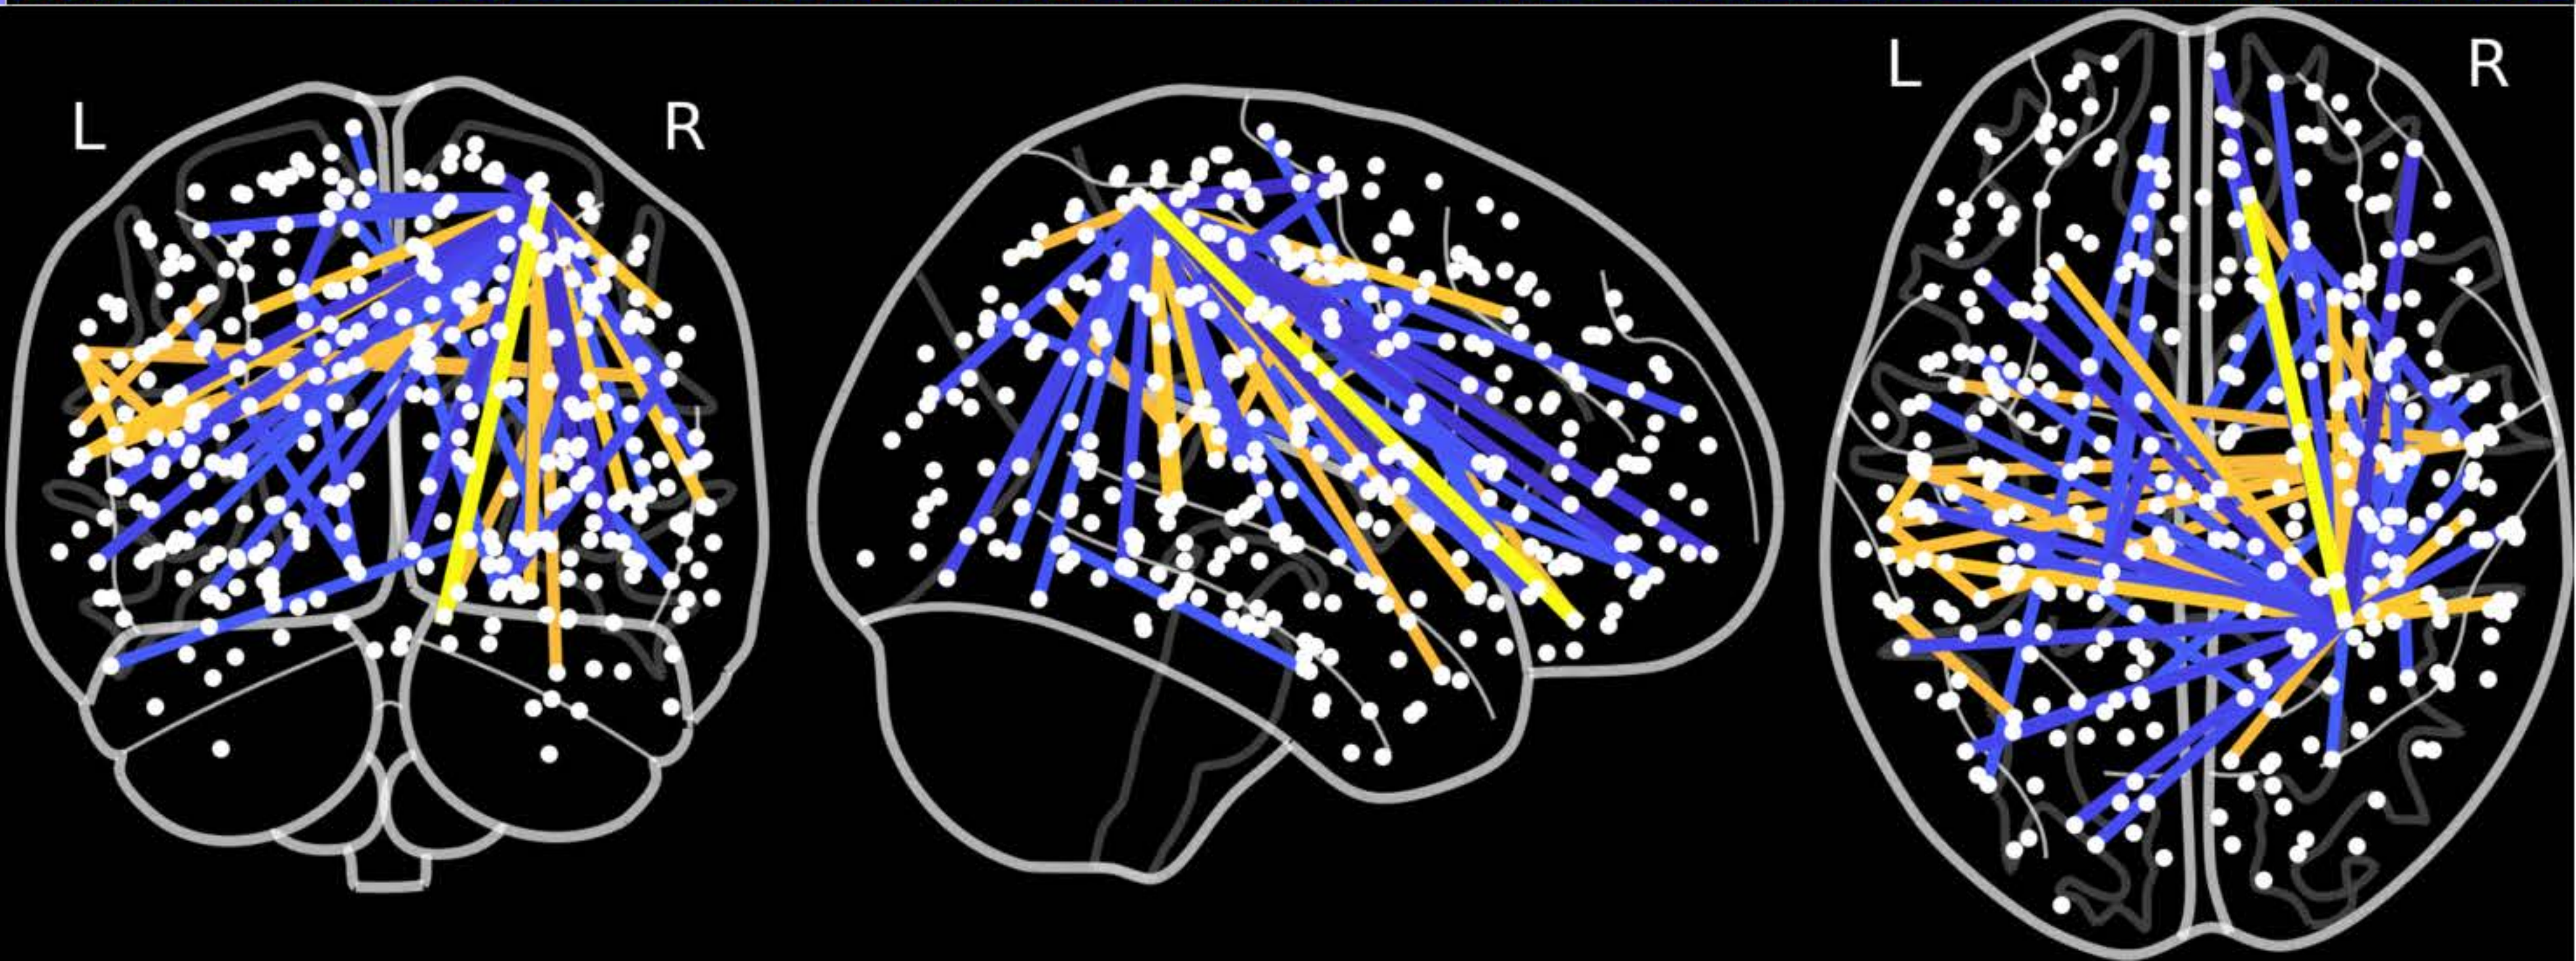



component\_9

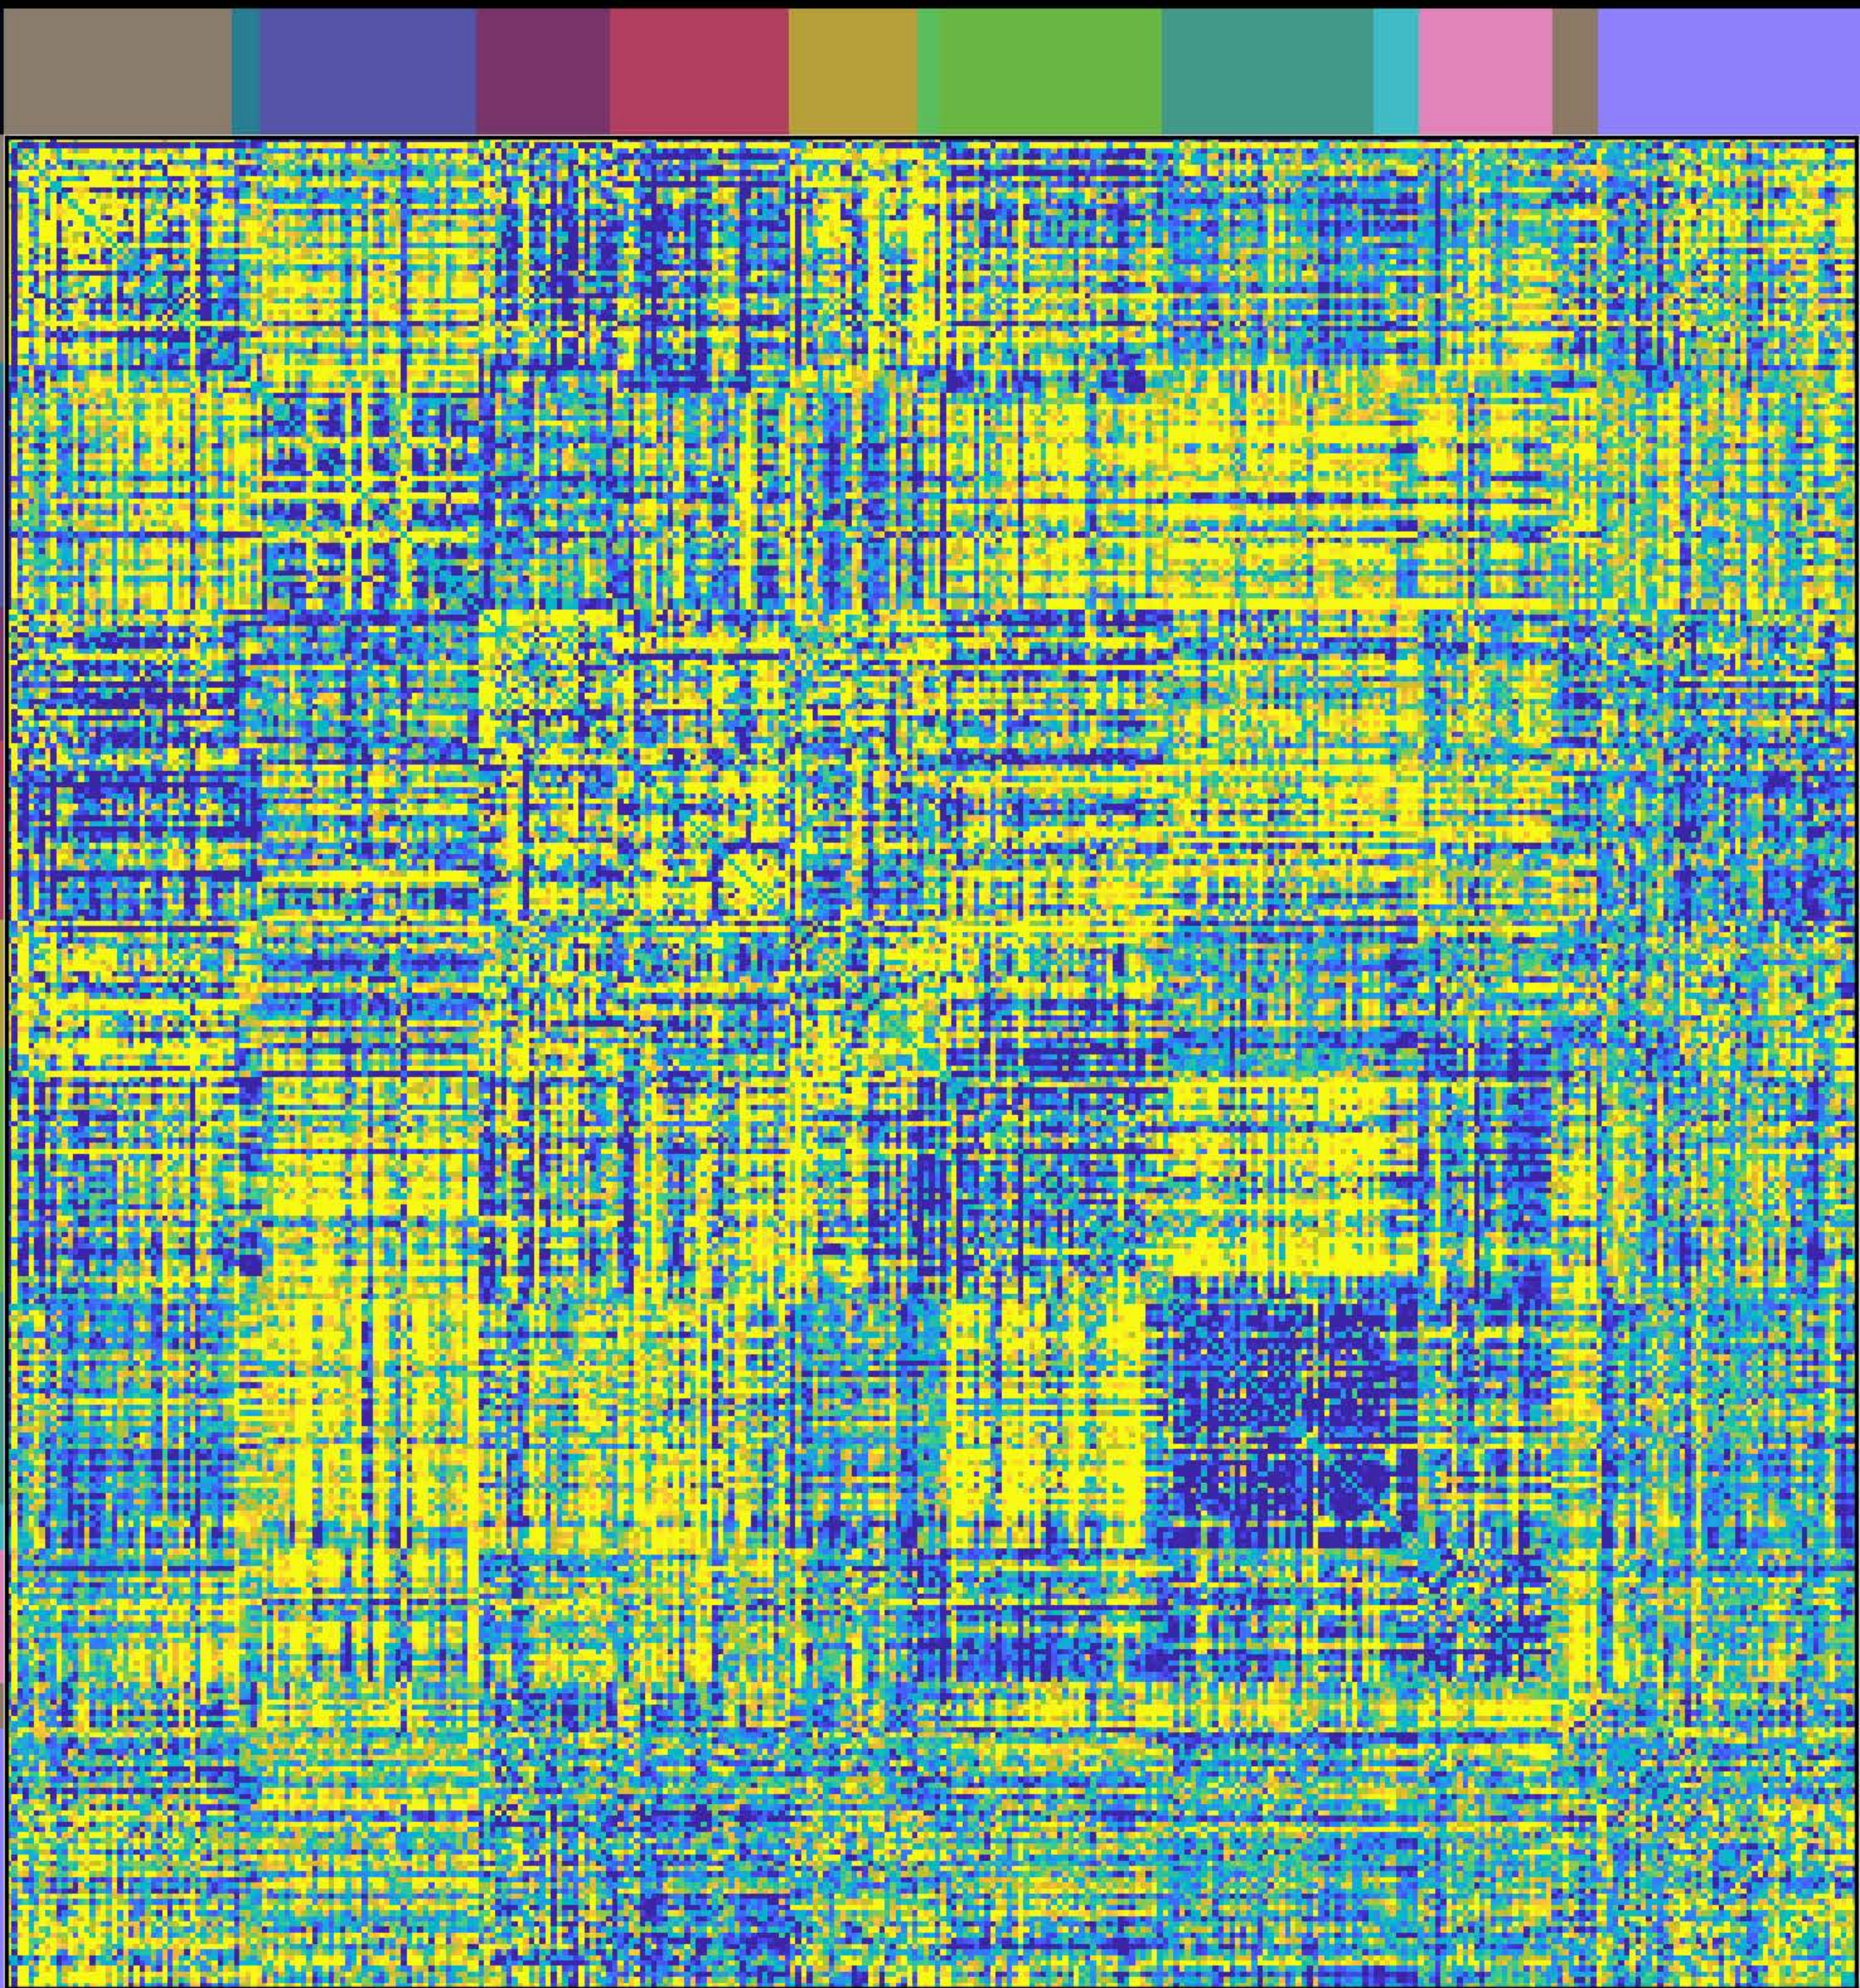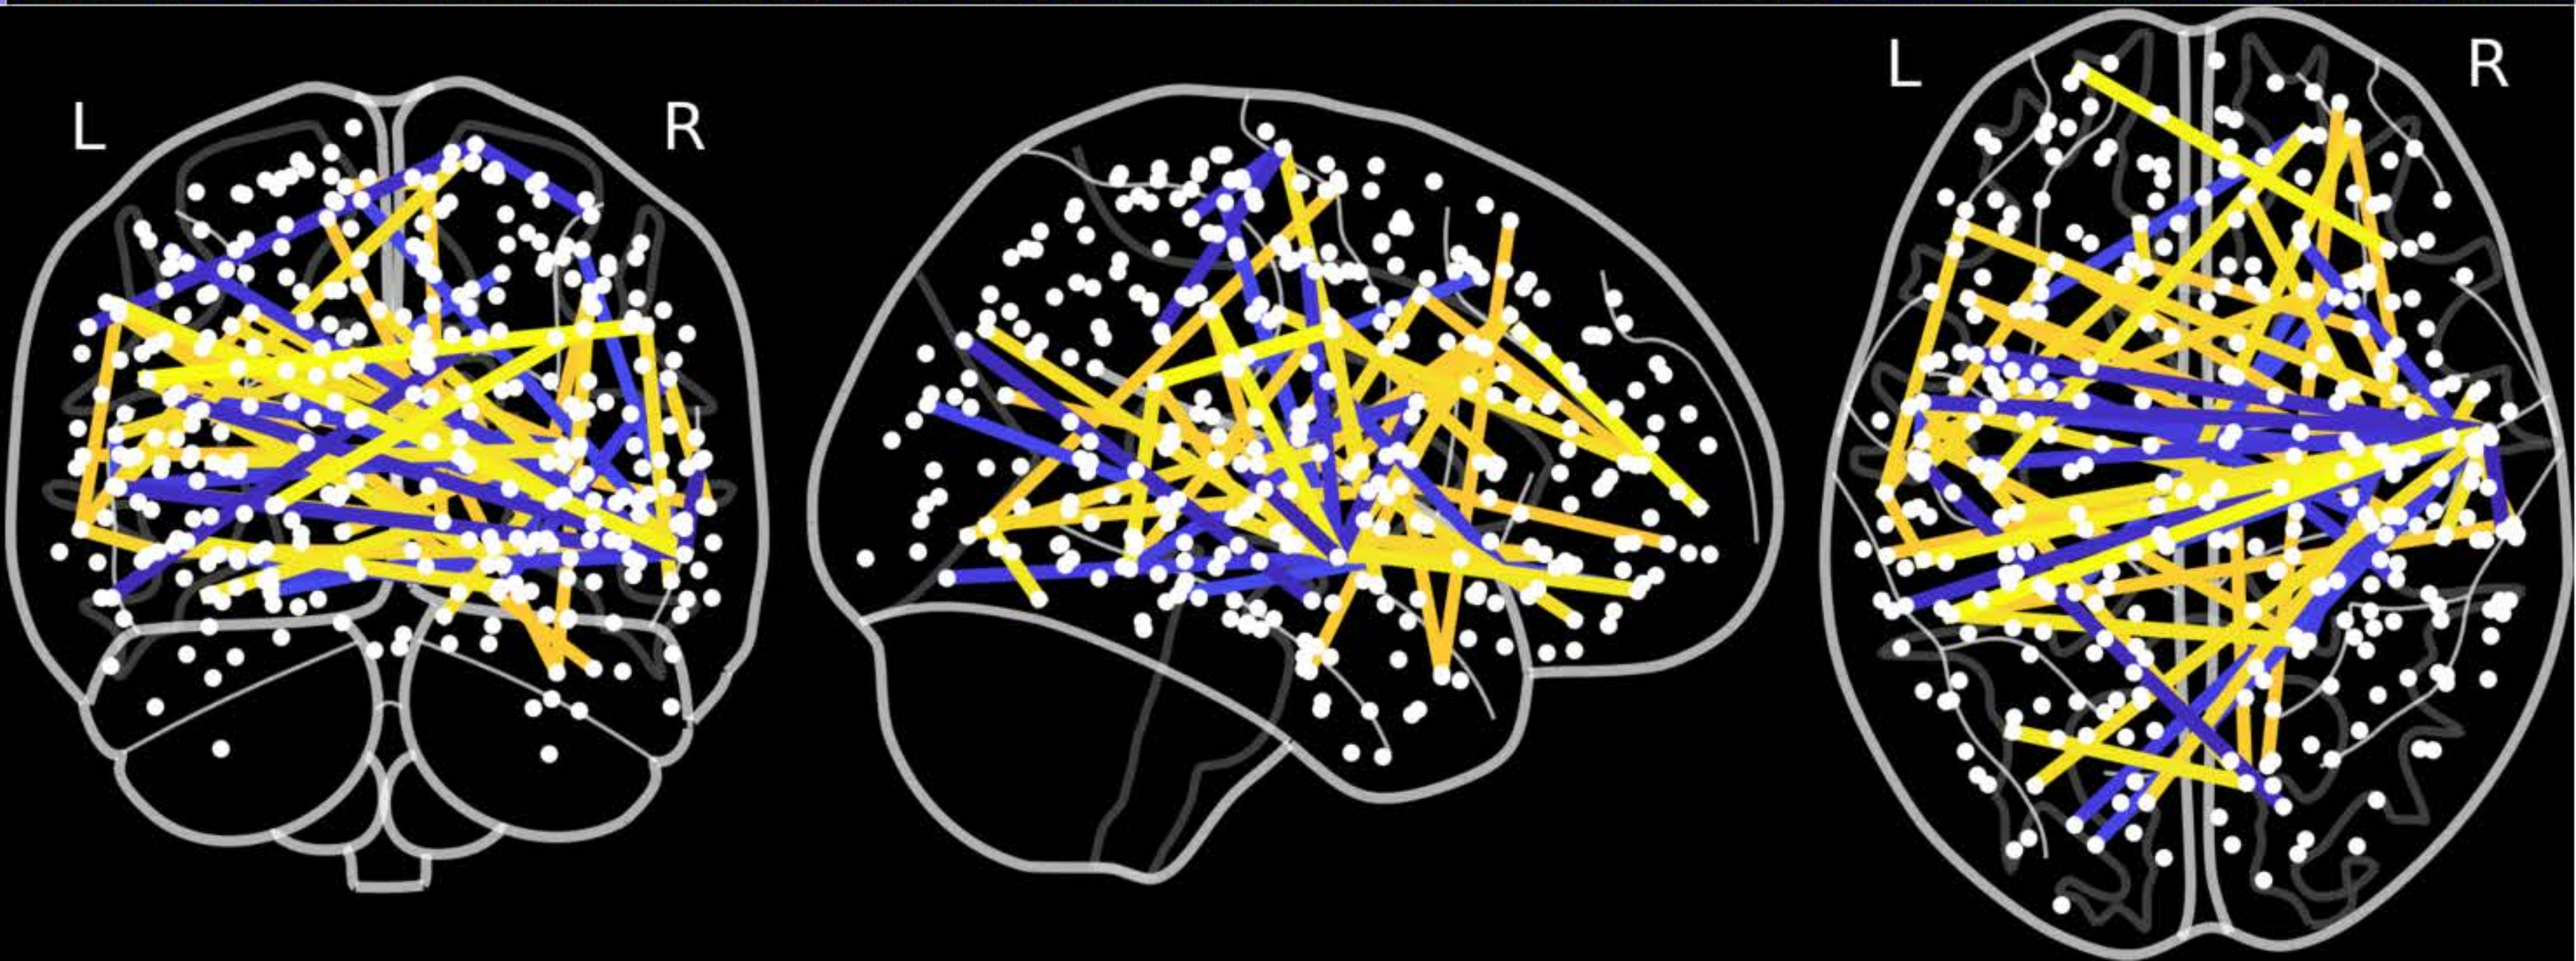



# component\_10

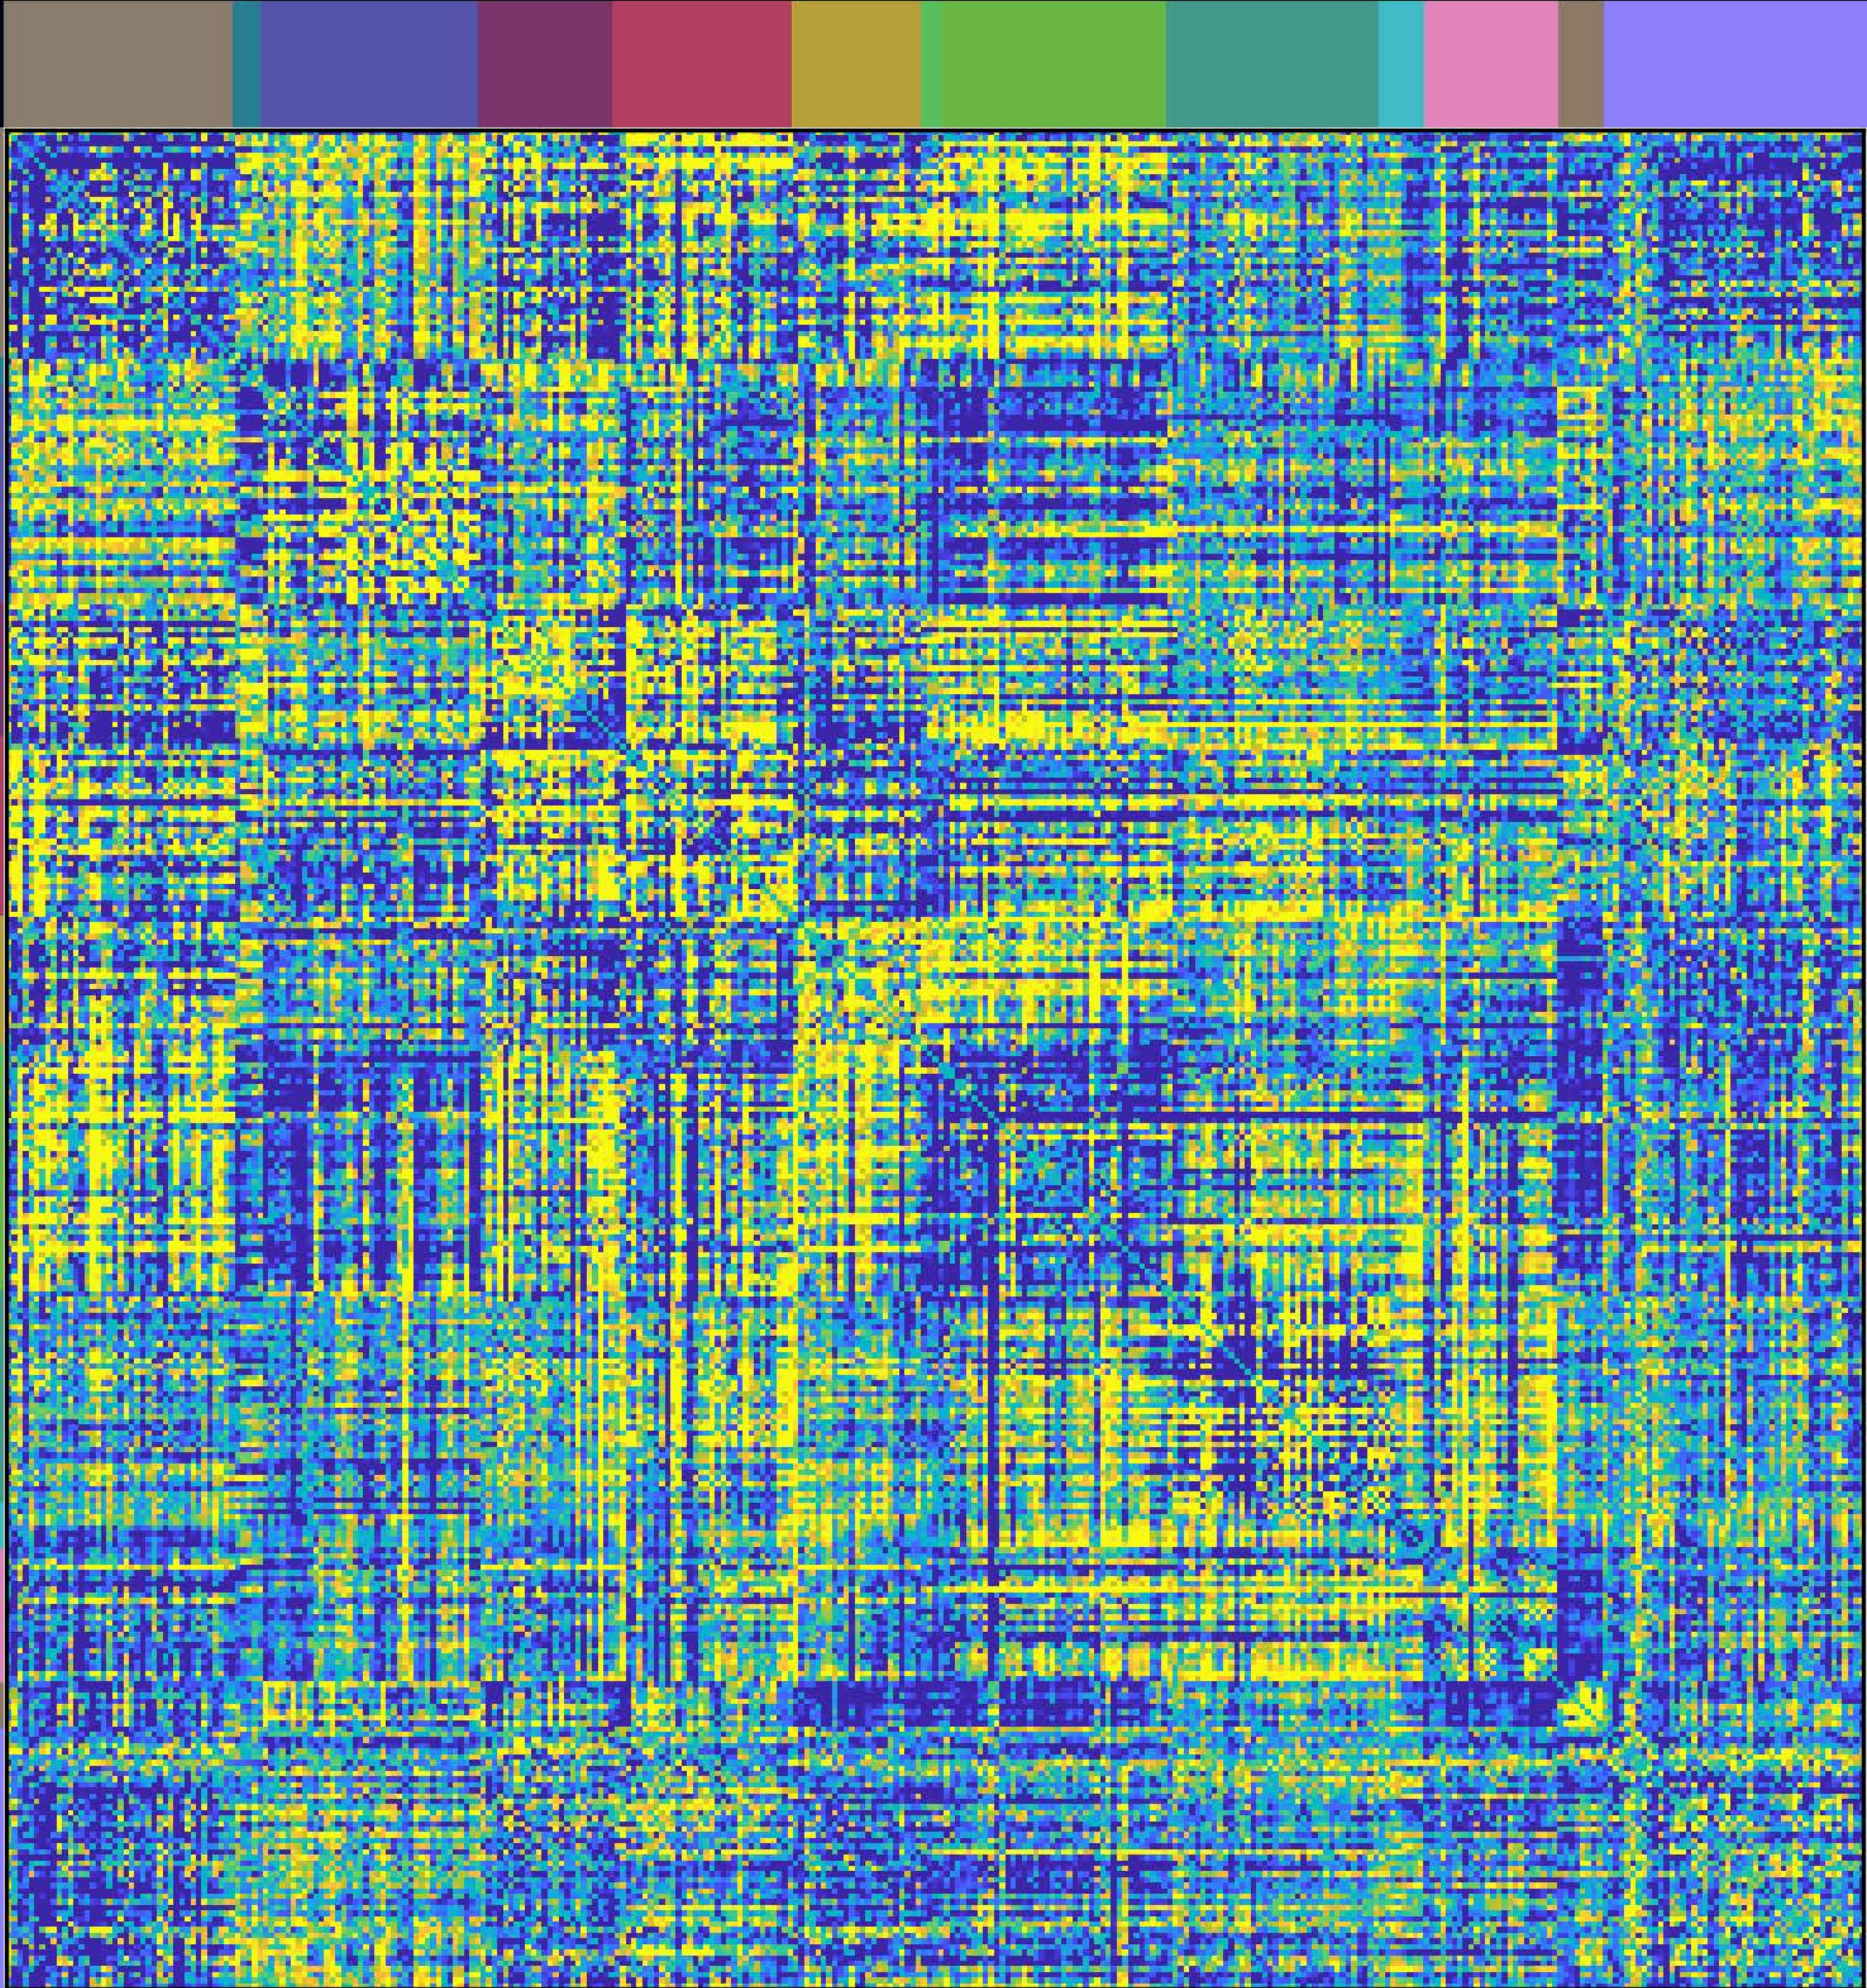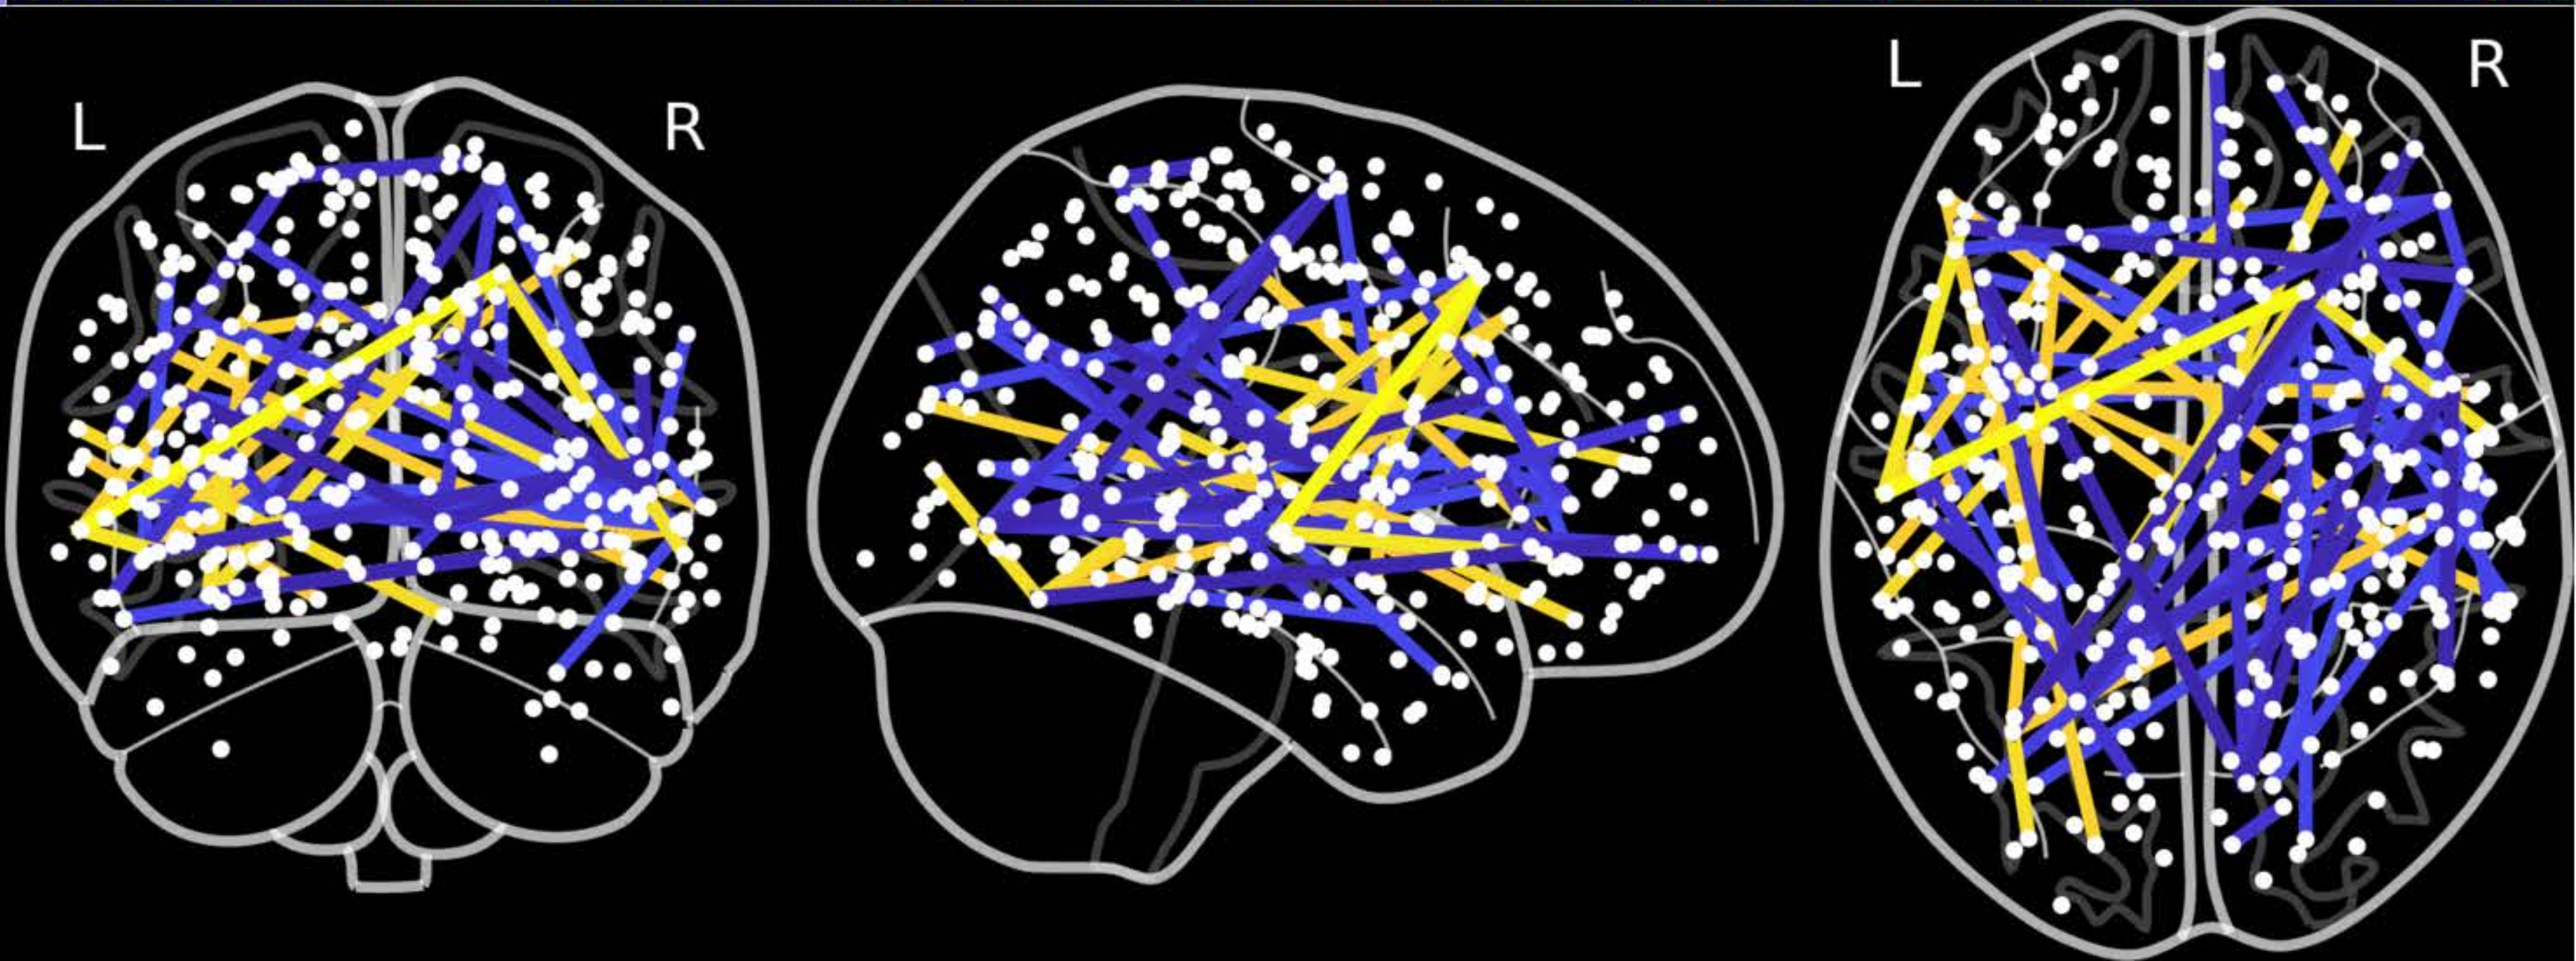



component\_11

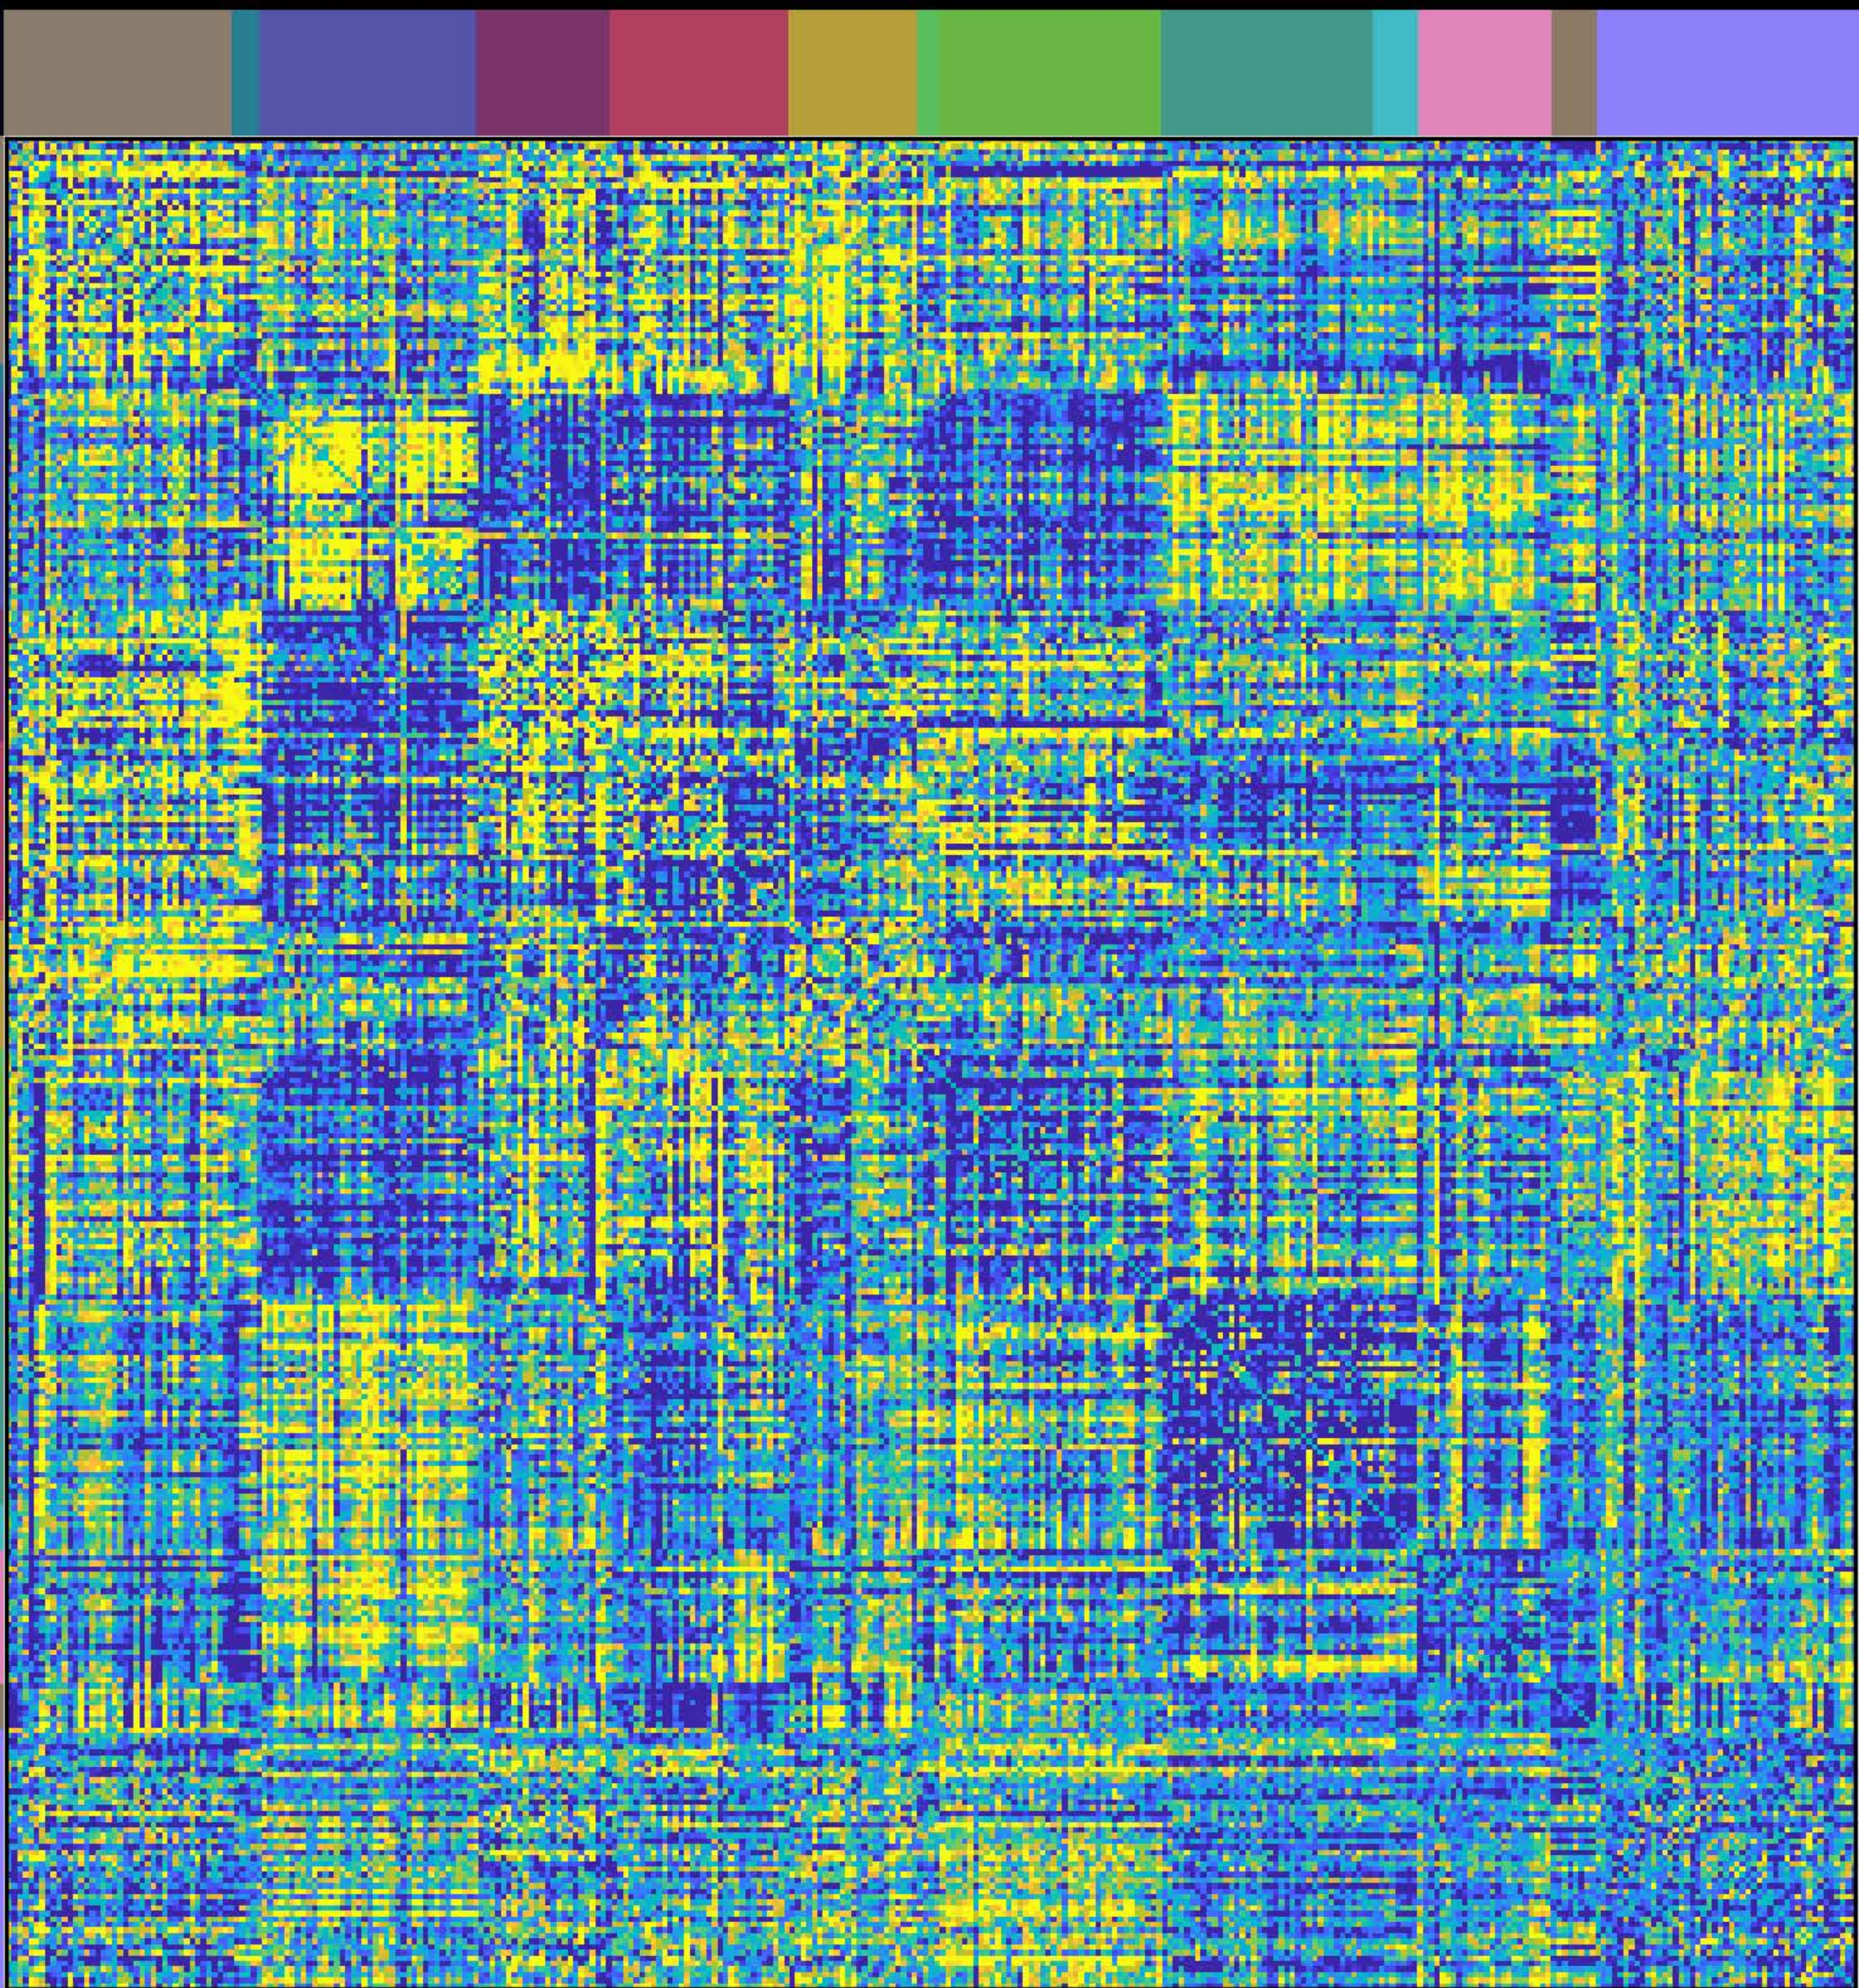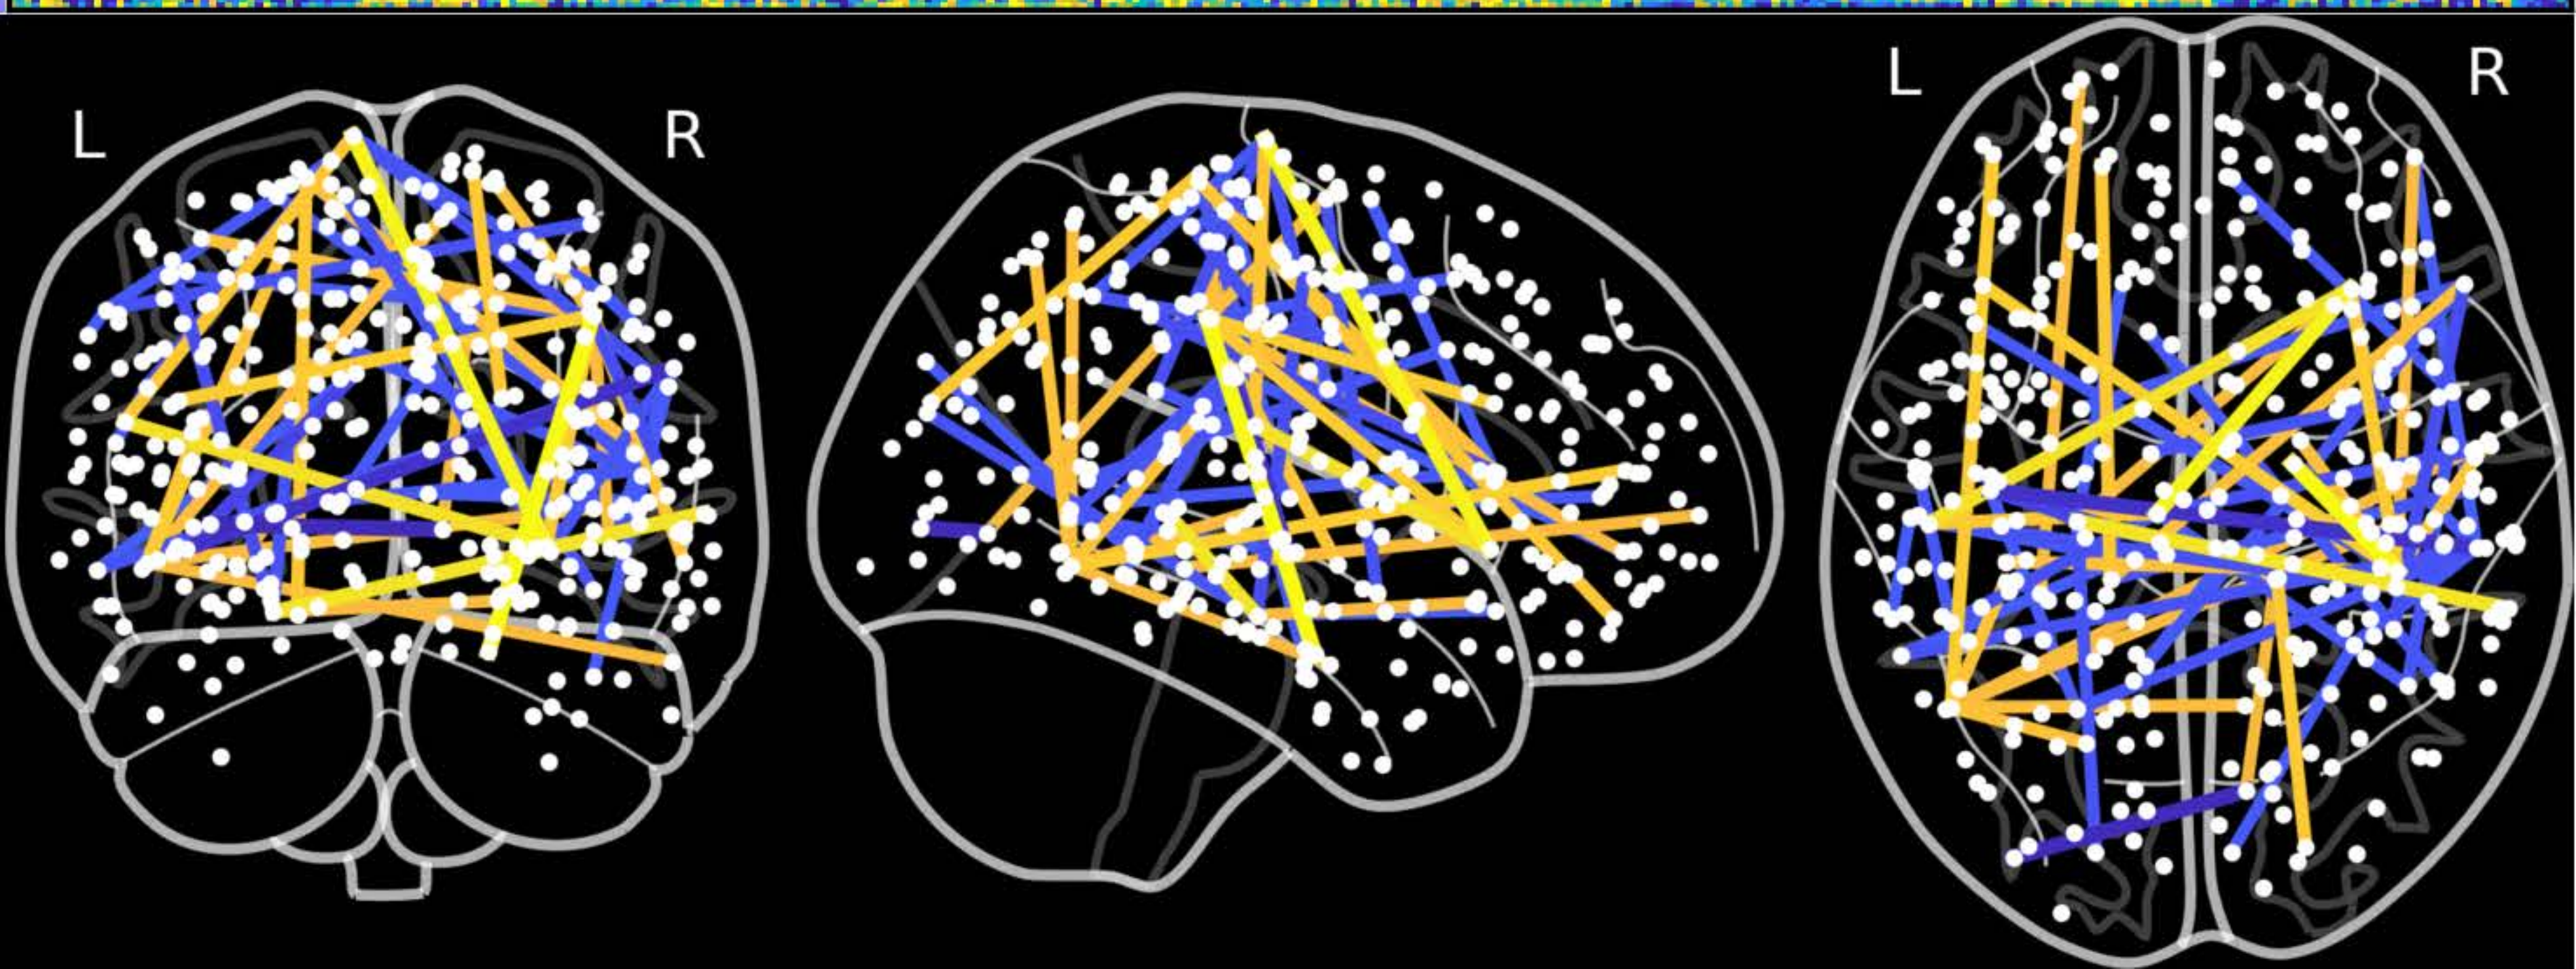



component\_12

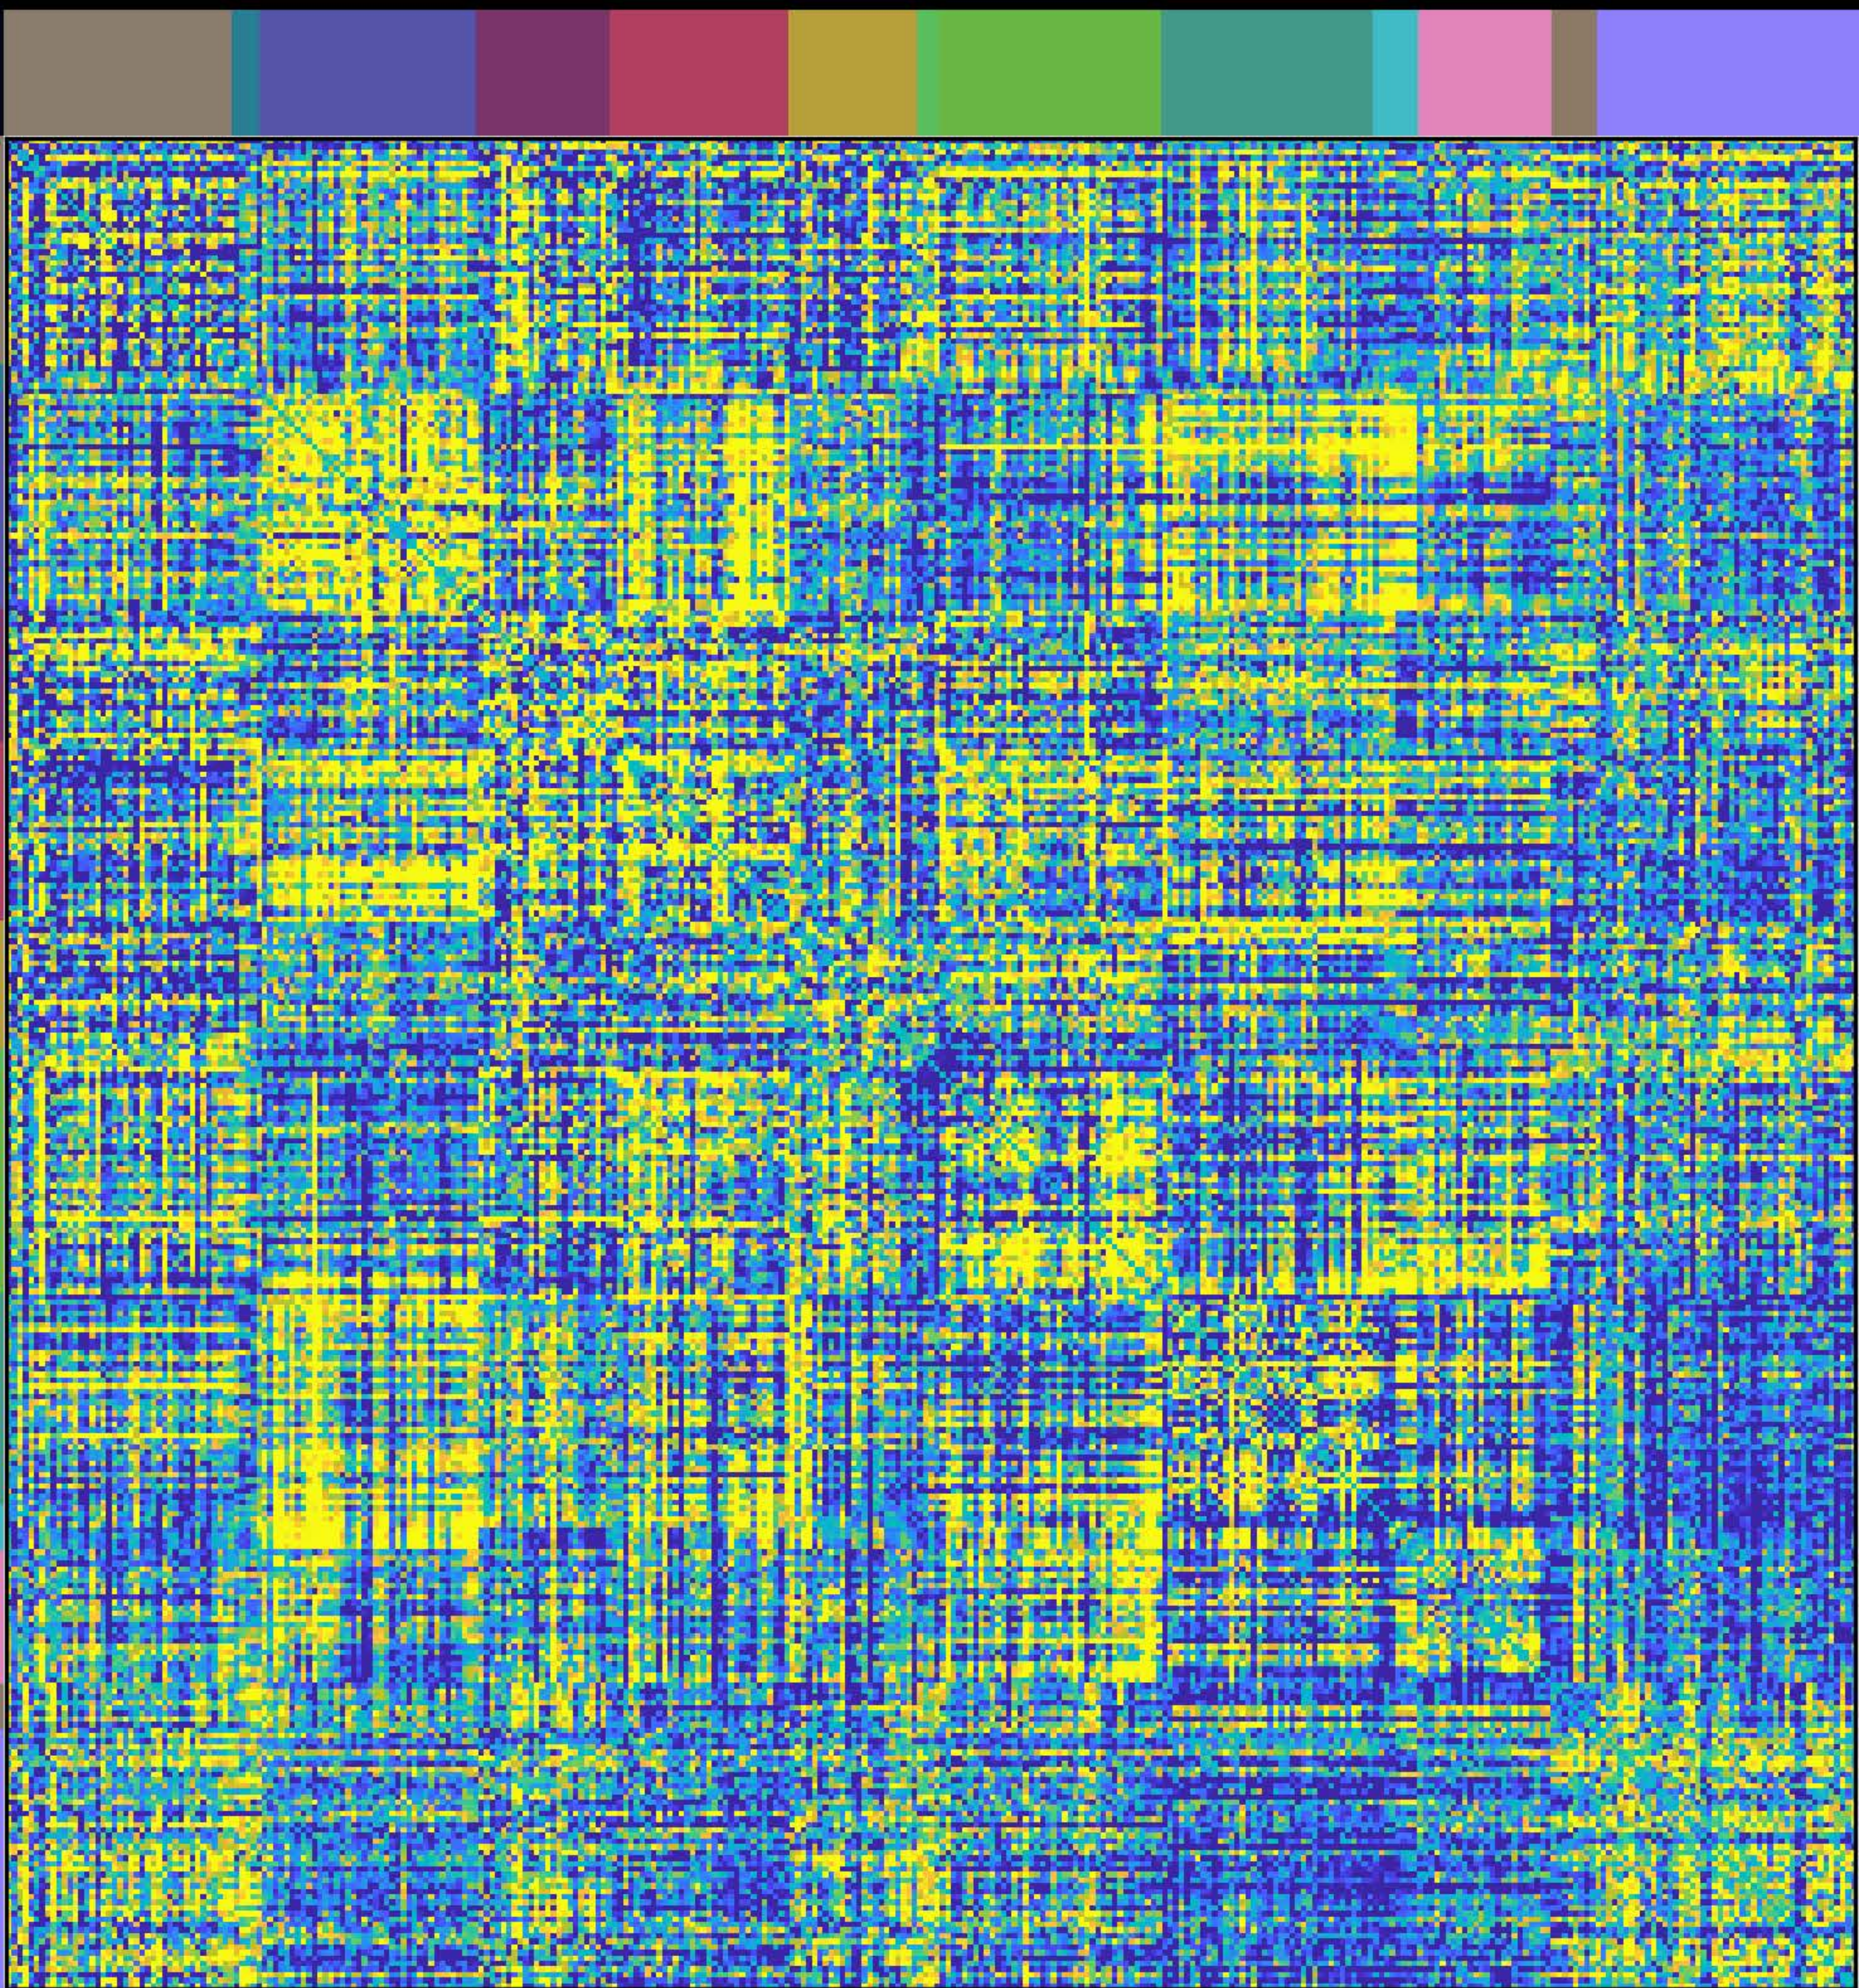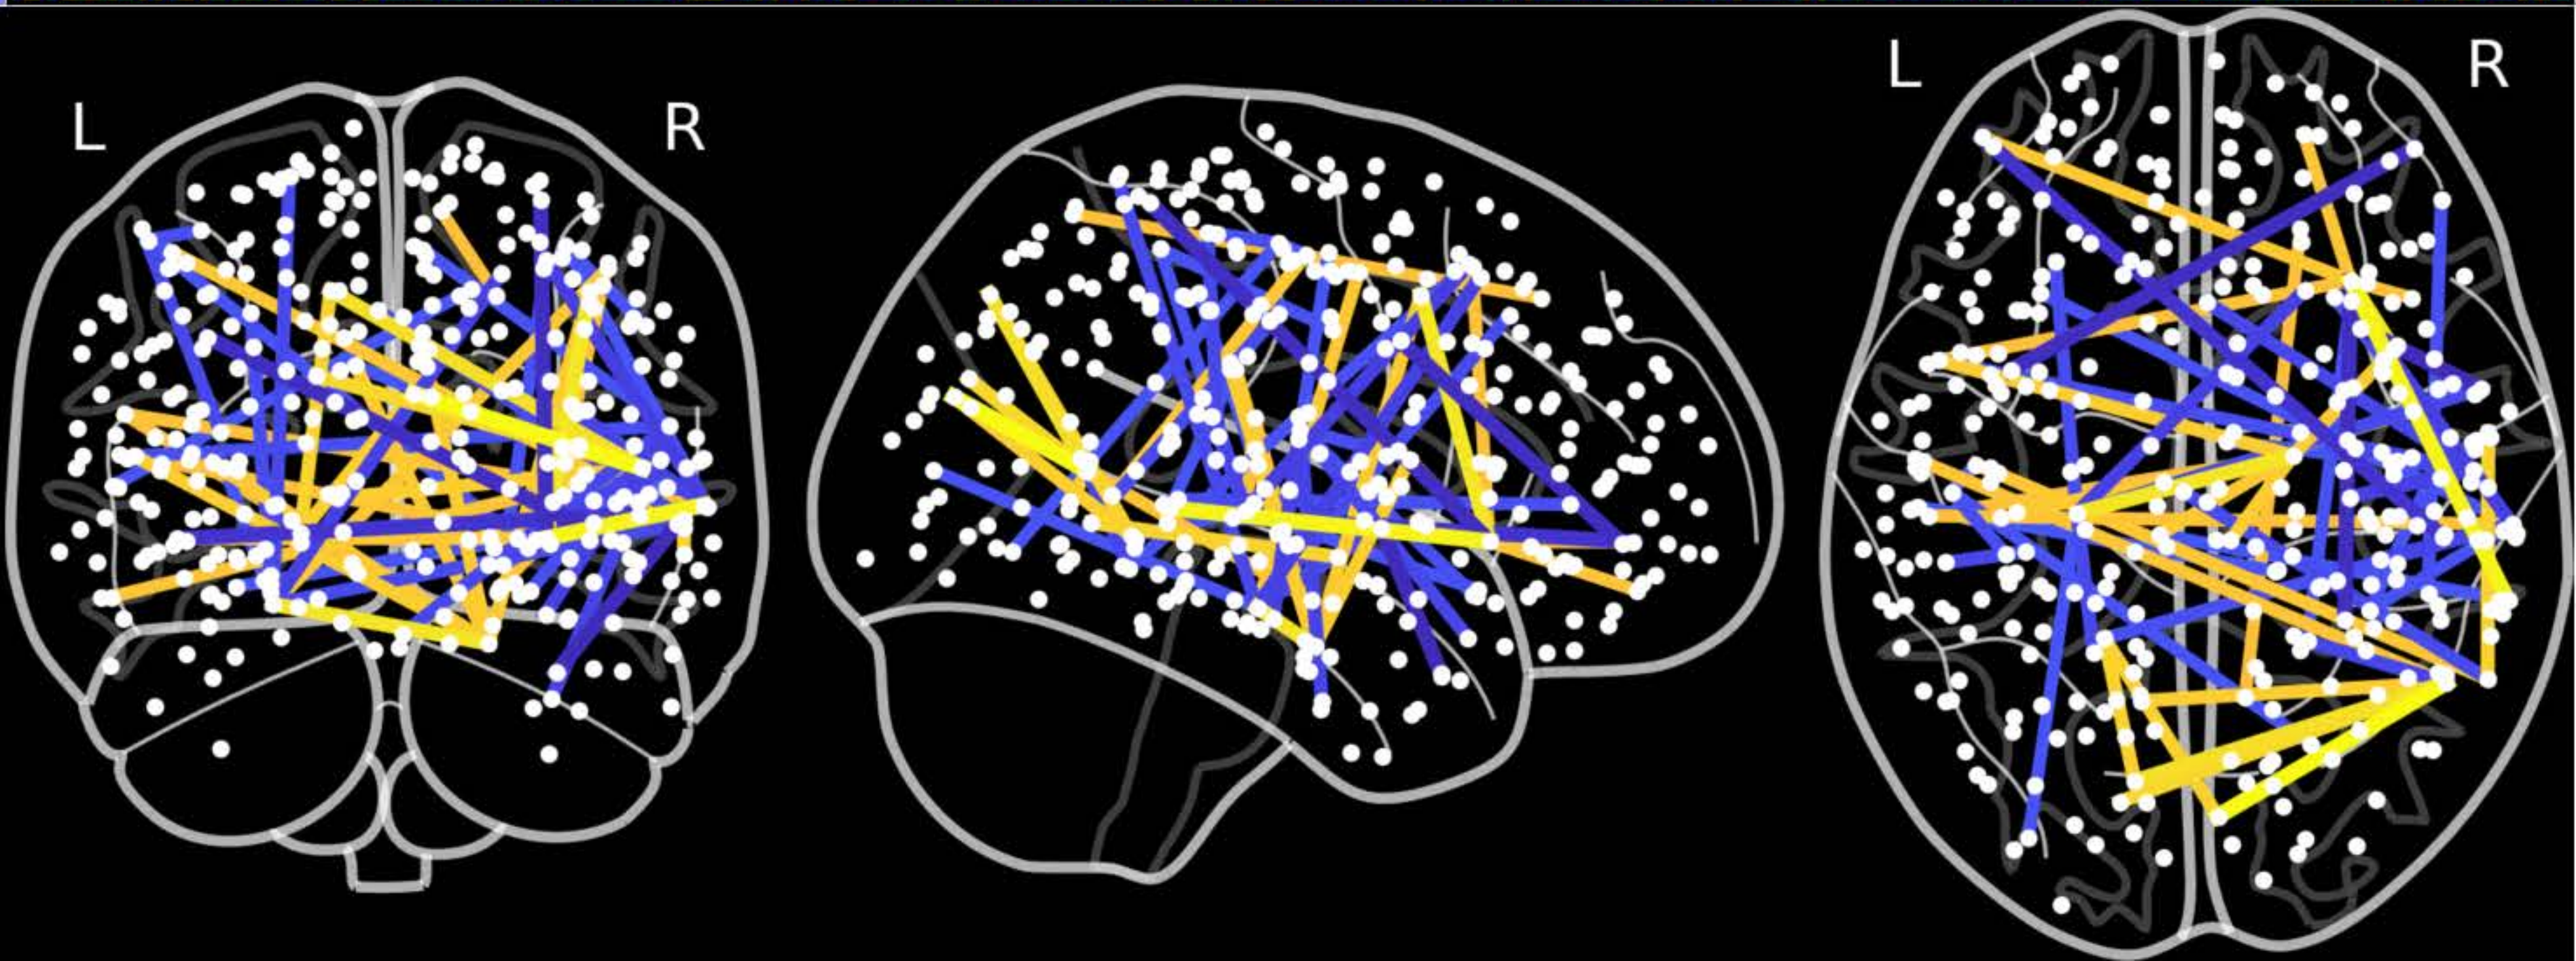



# component\_13

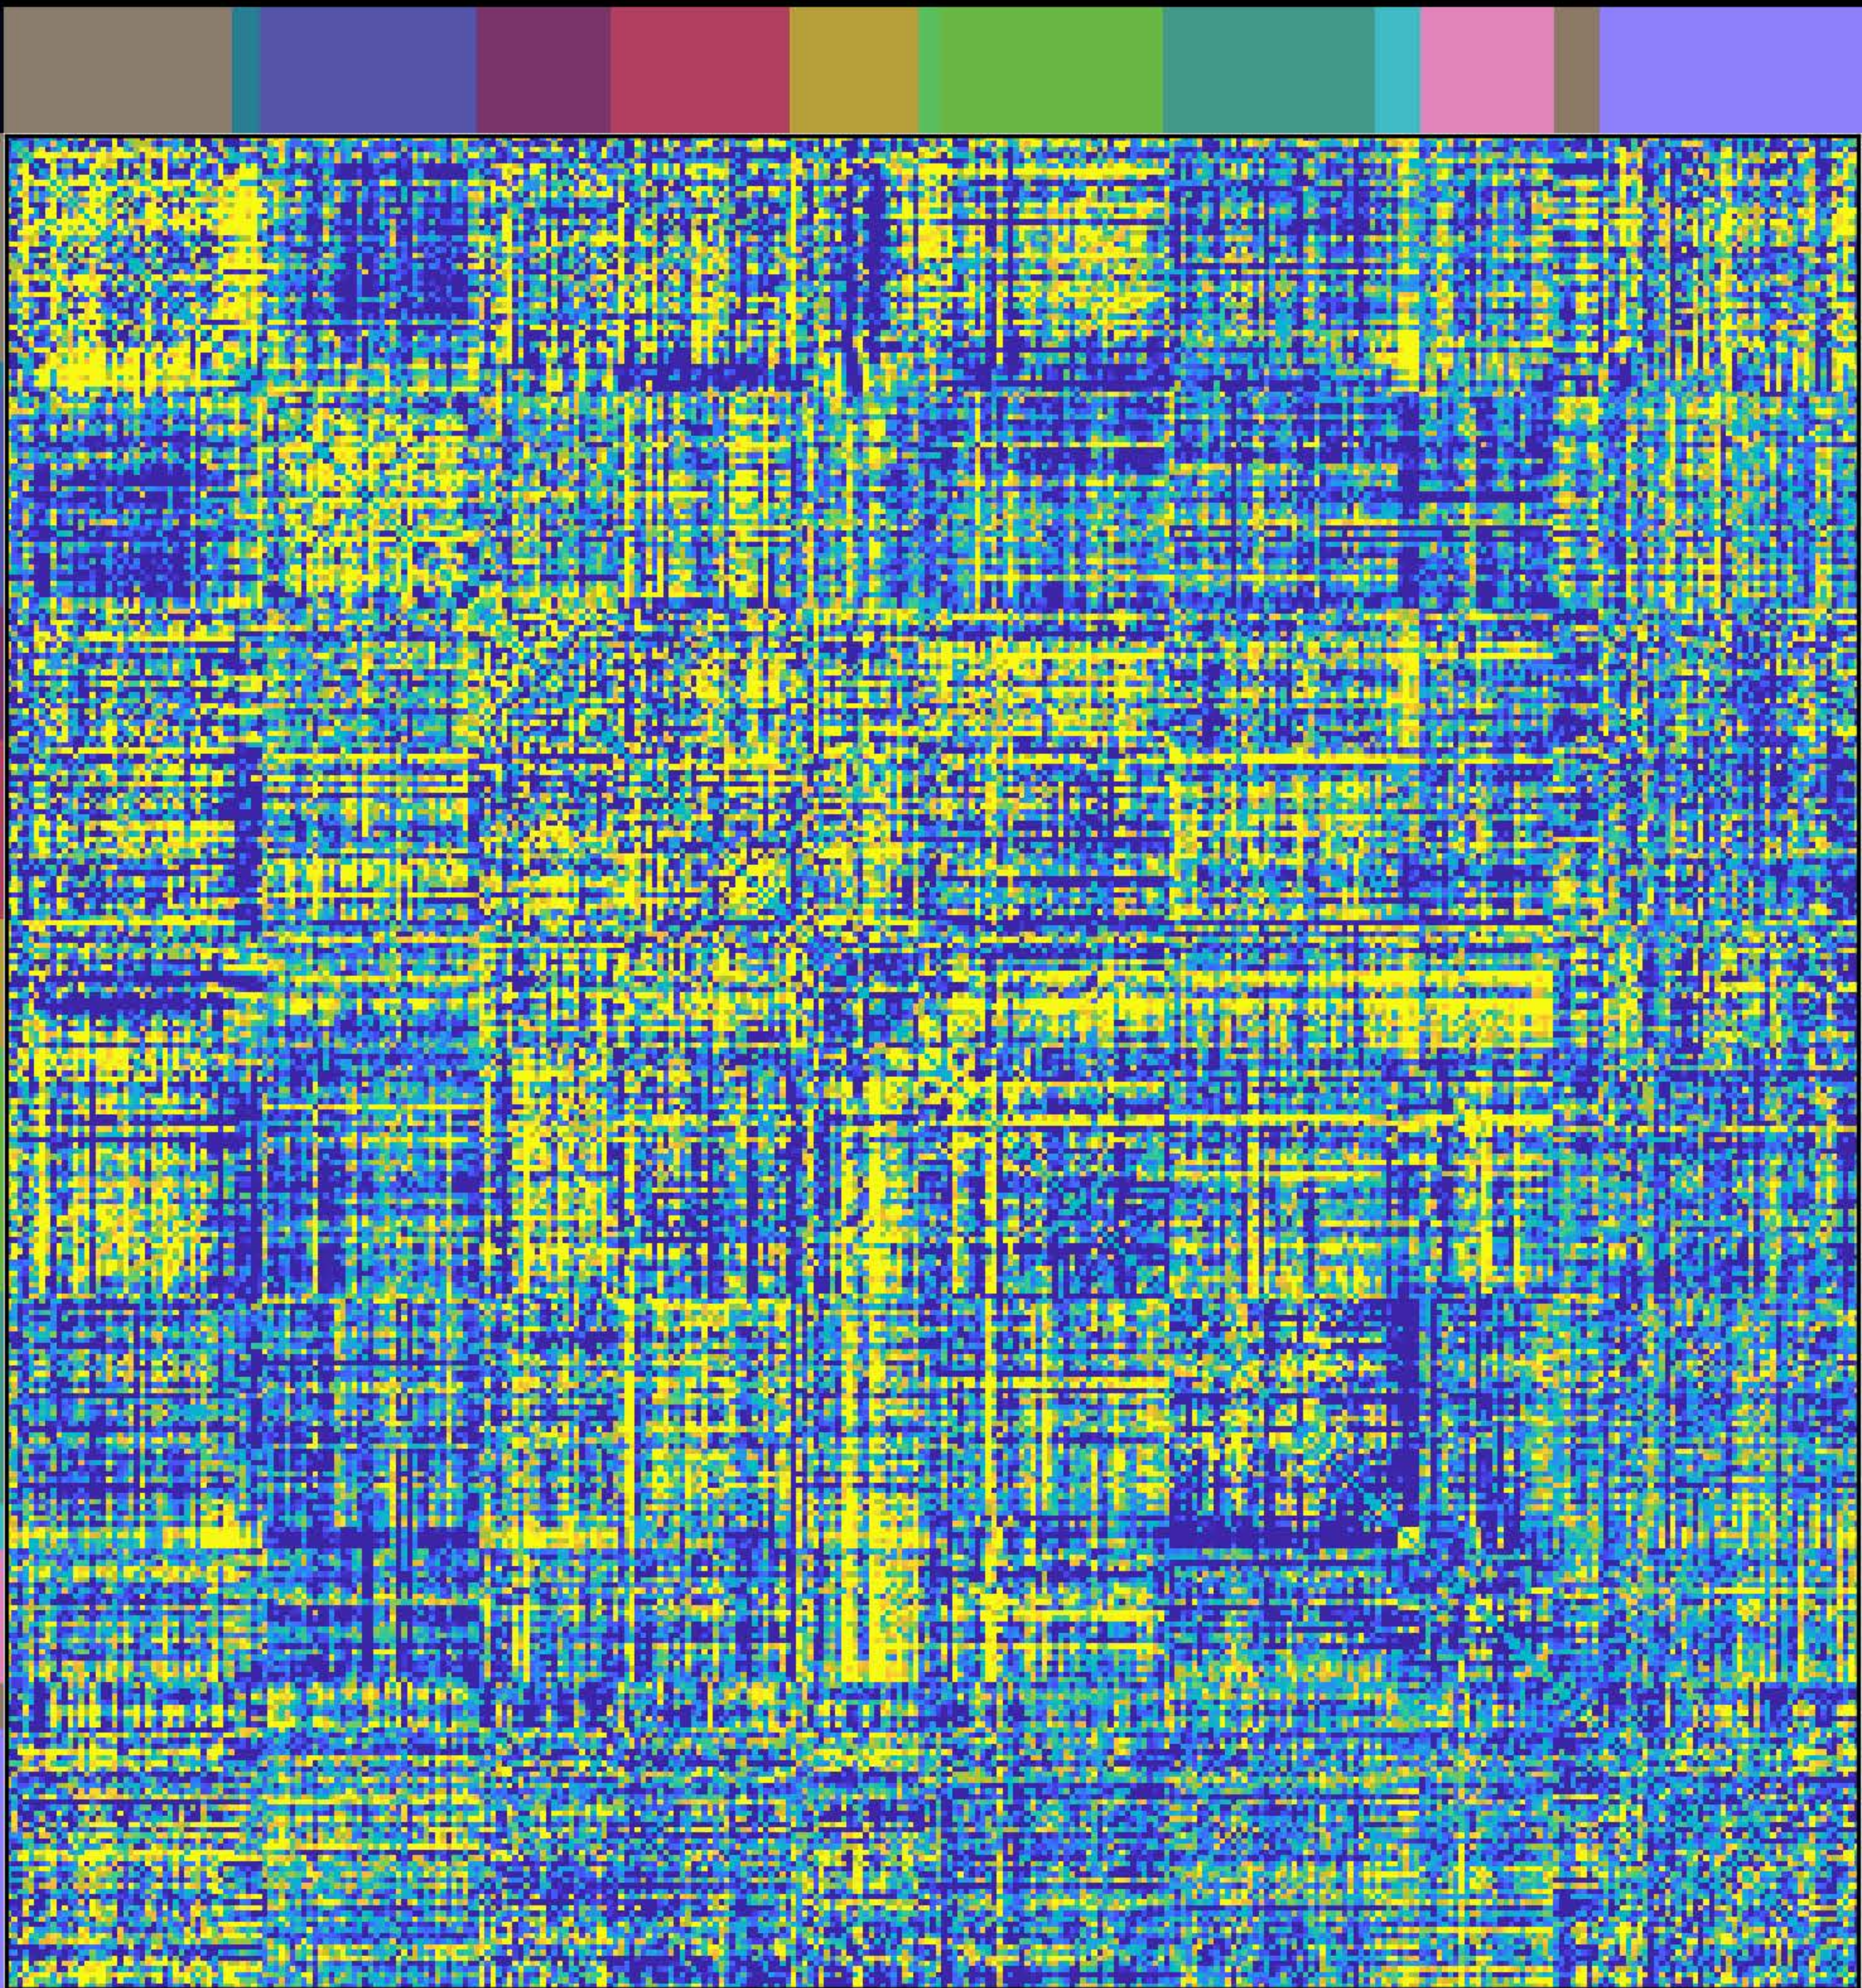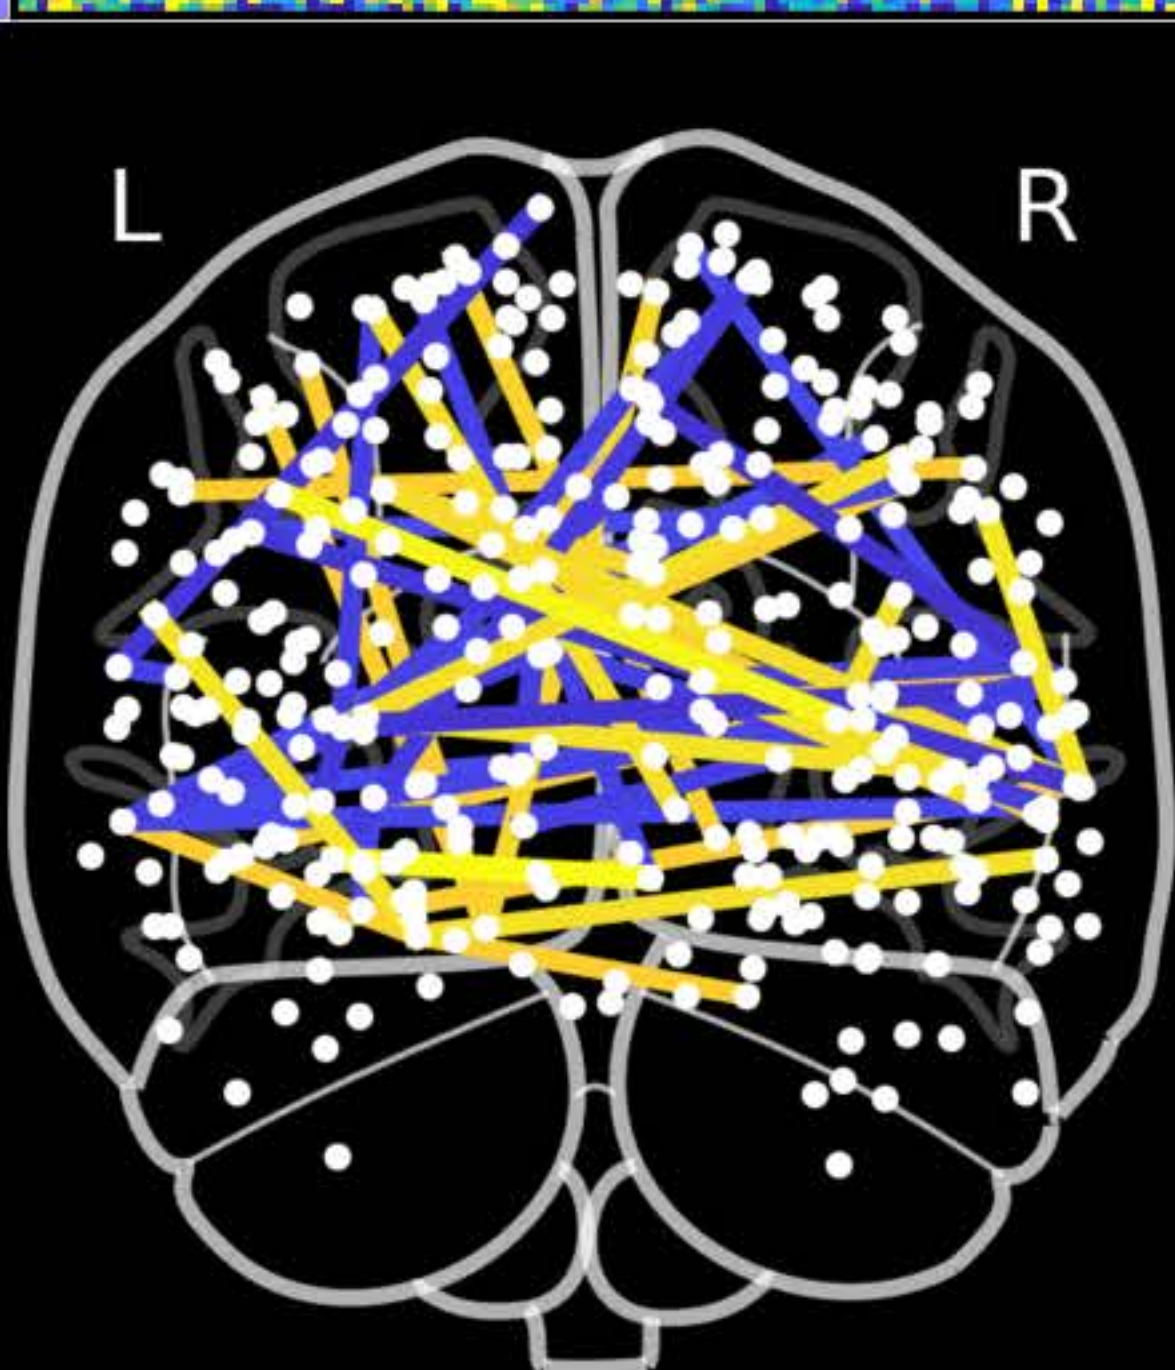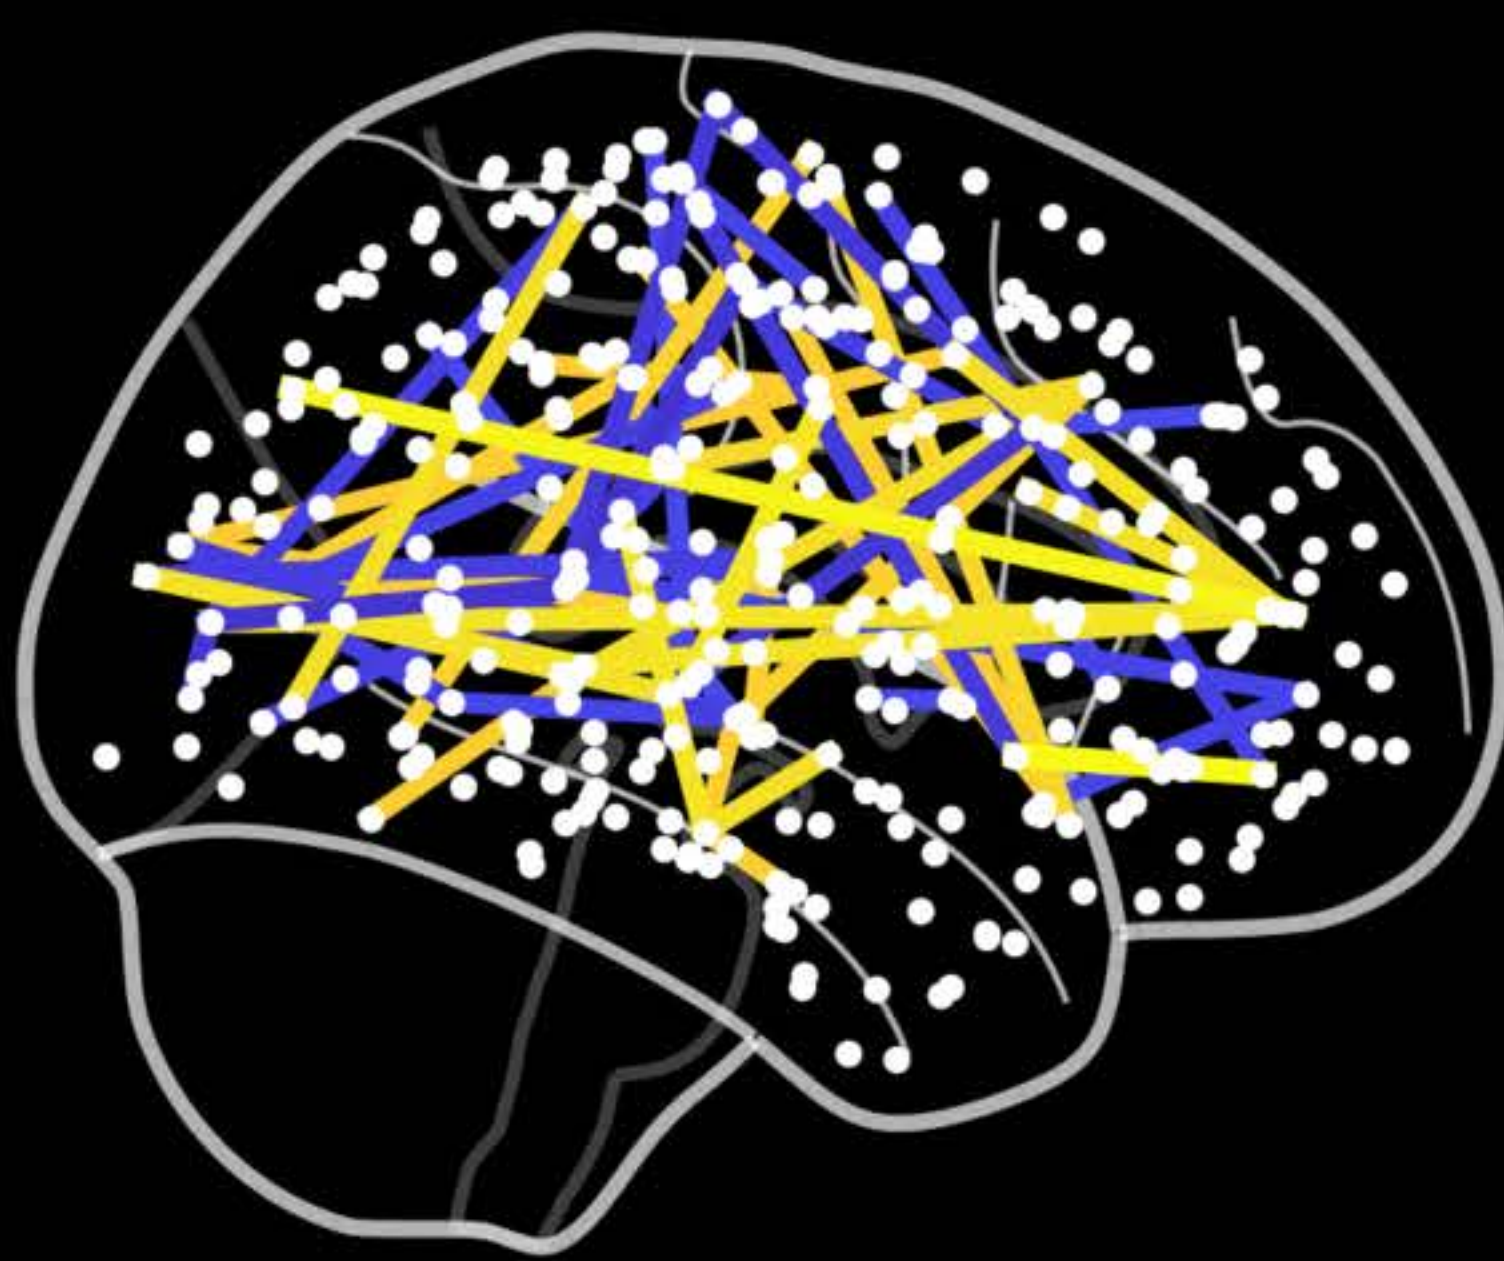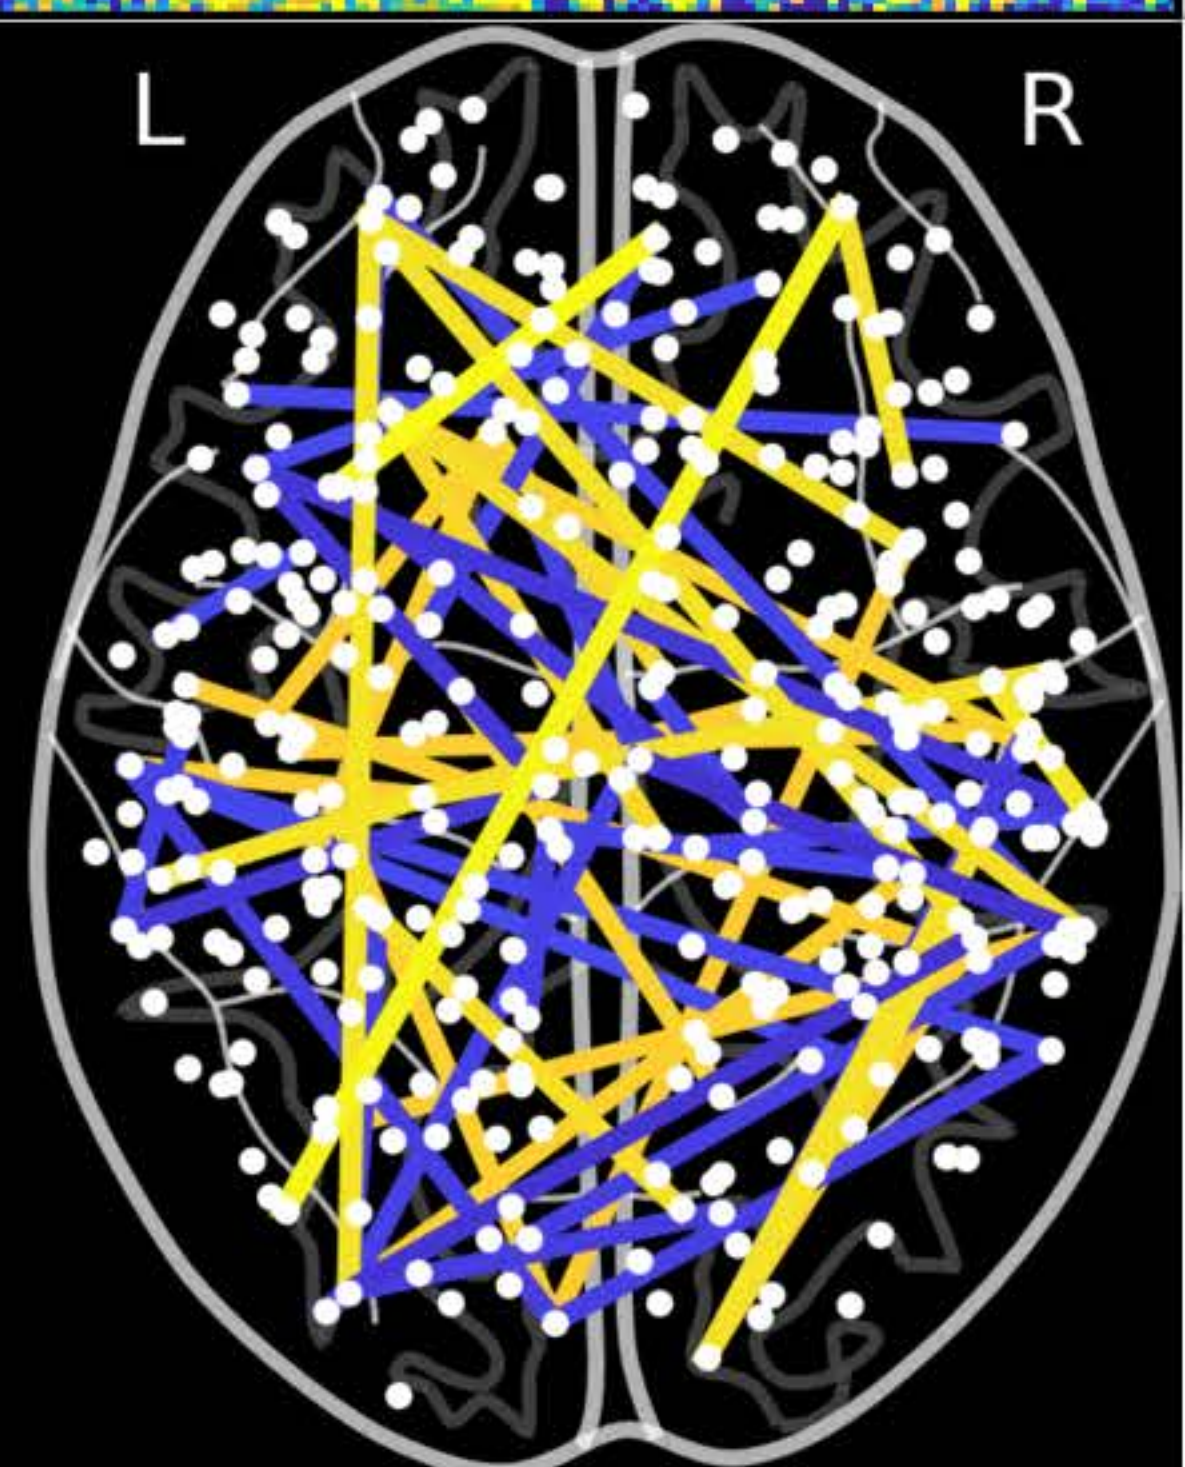



component\_14

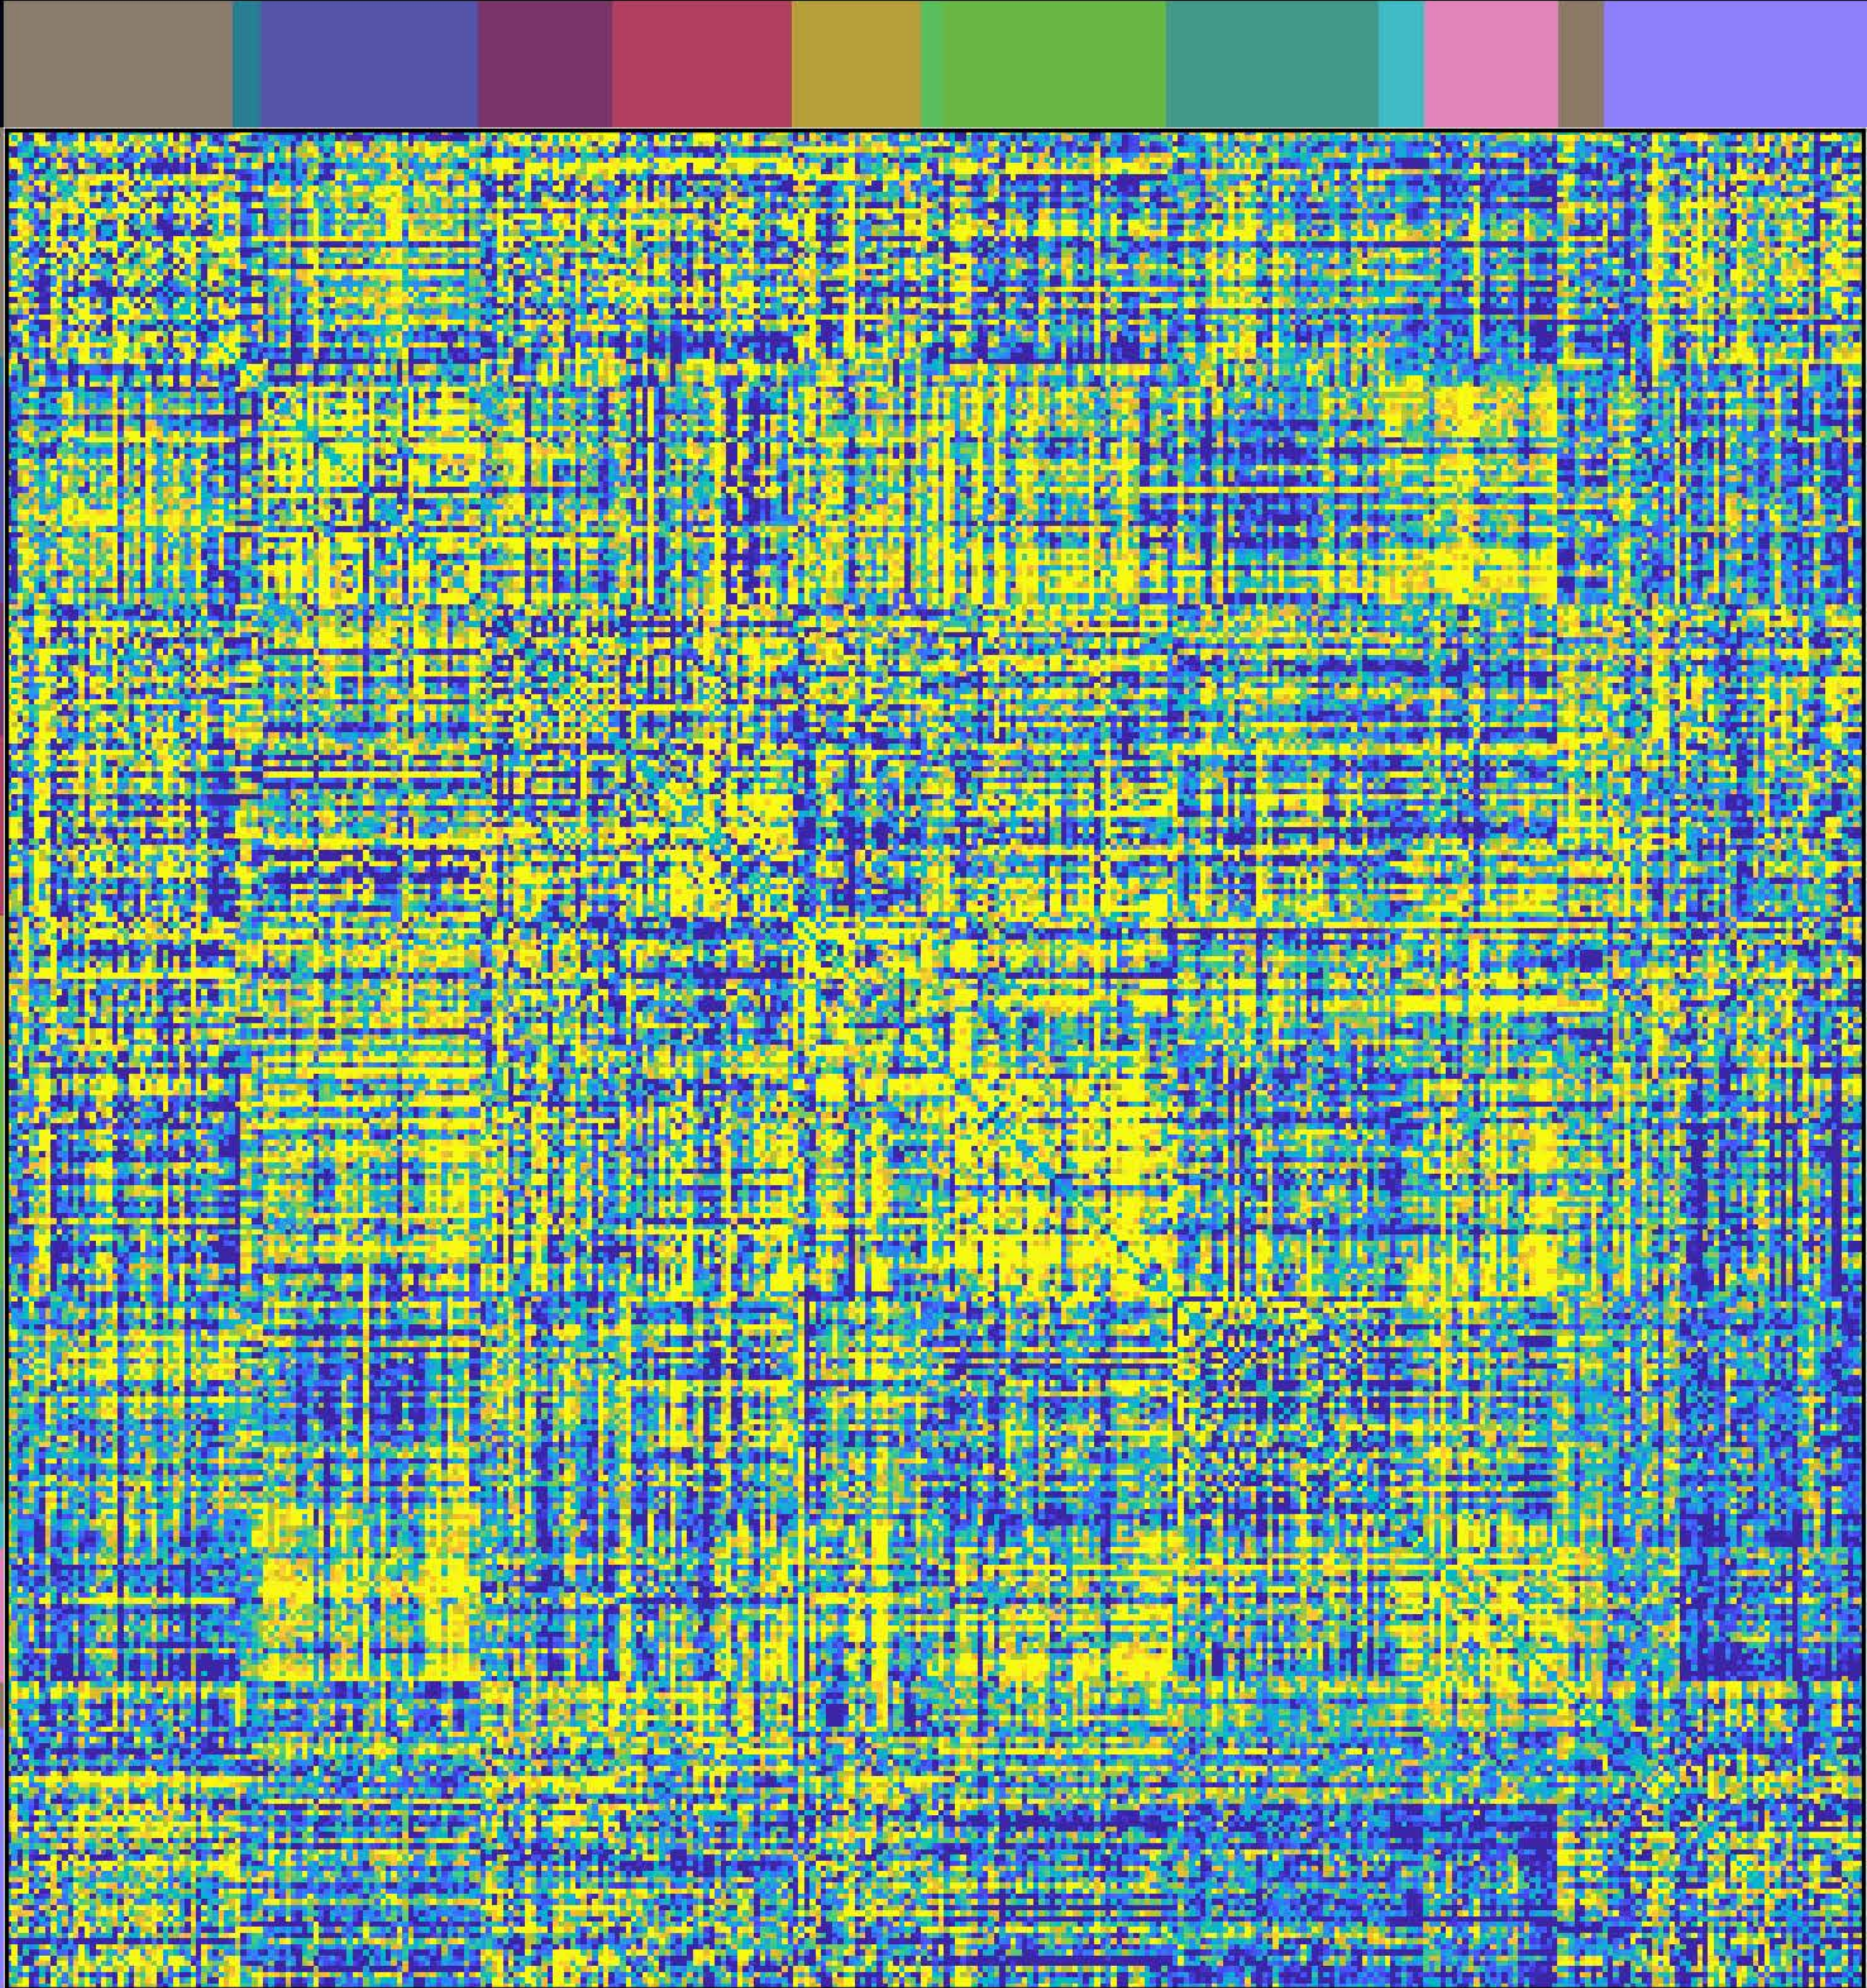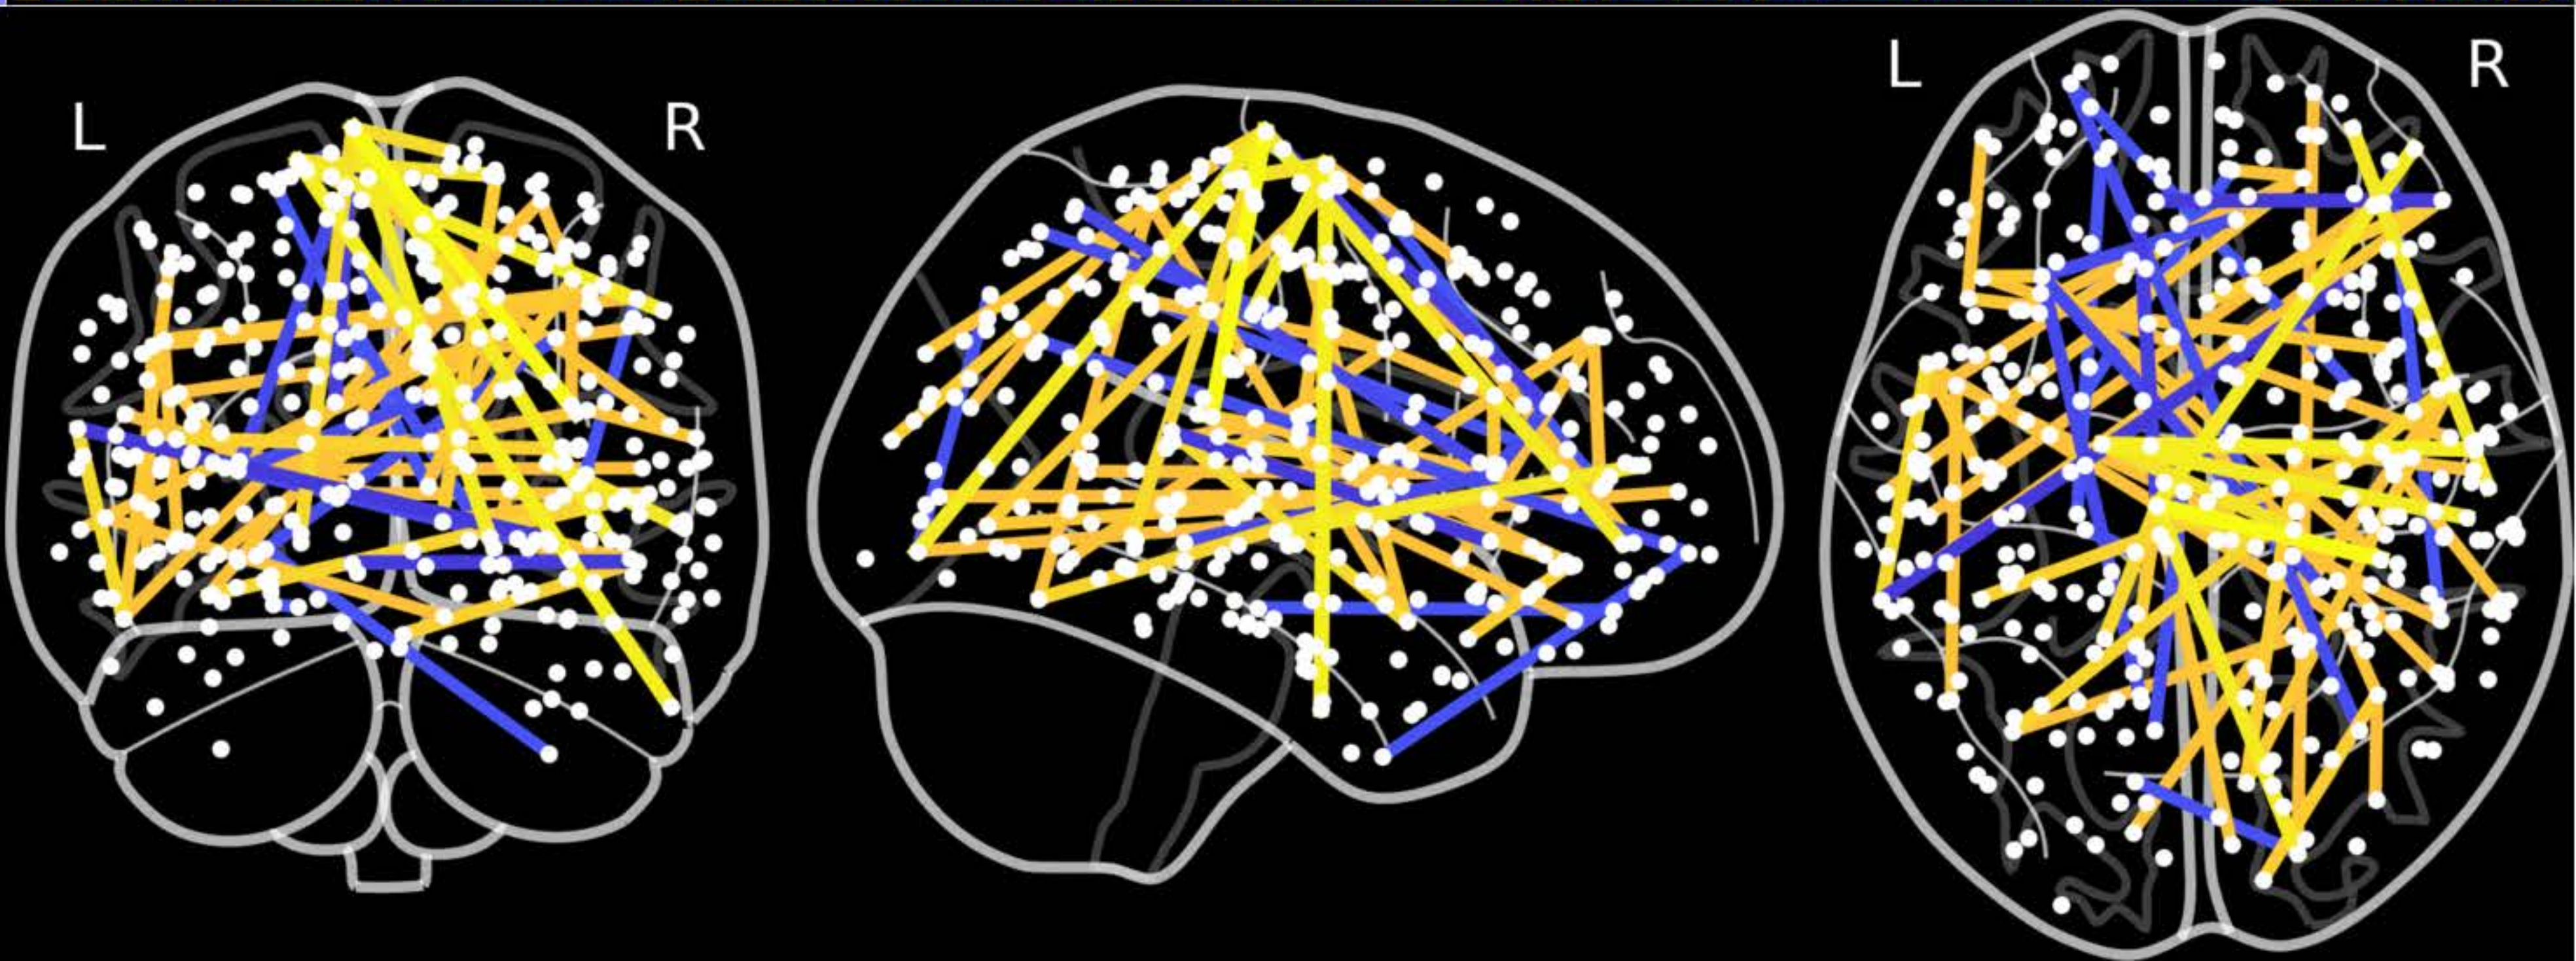



# component\_15

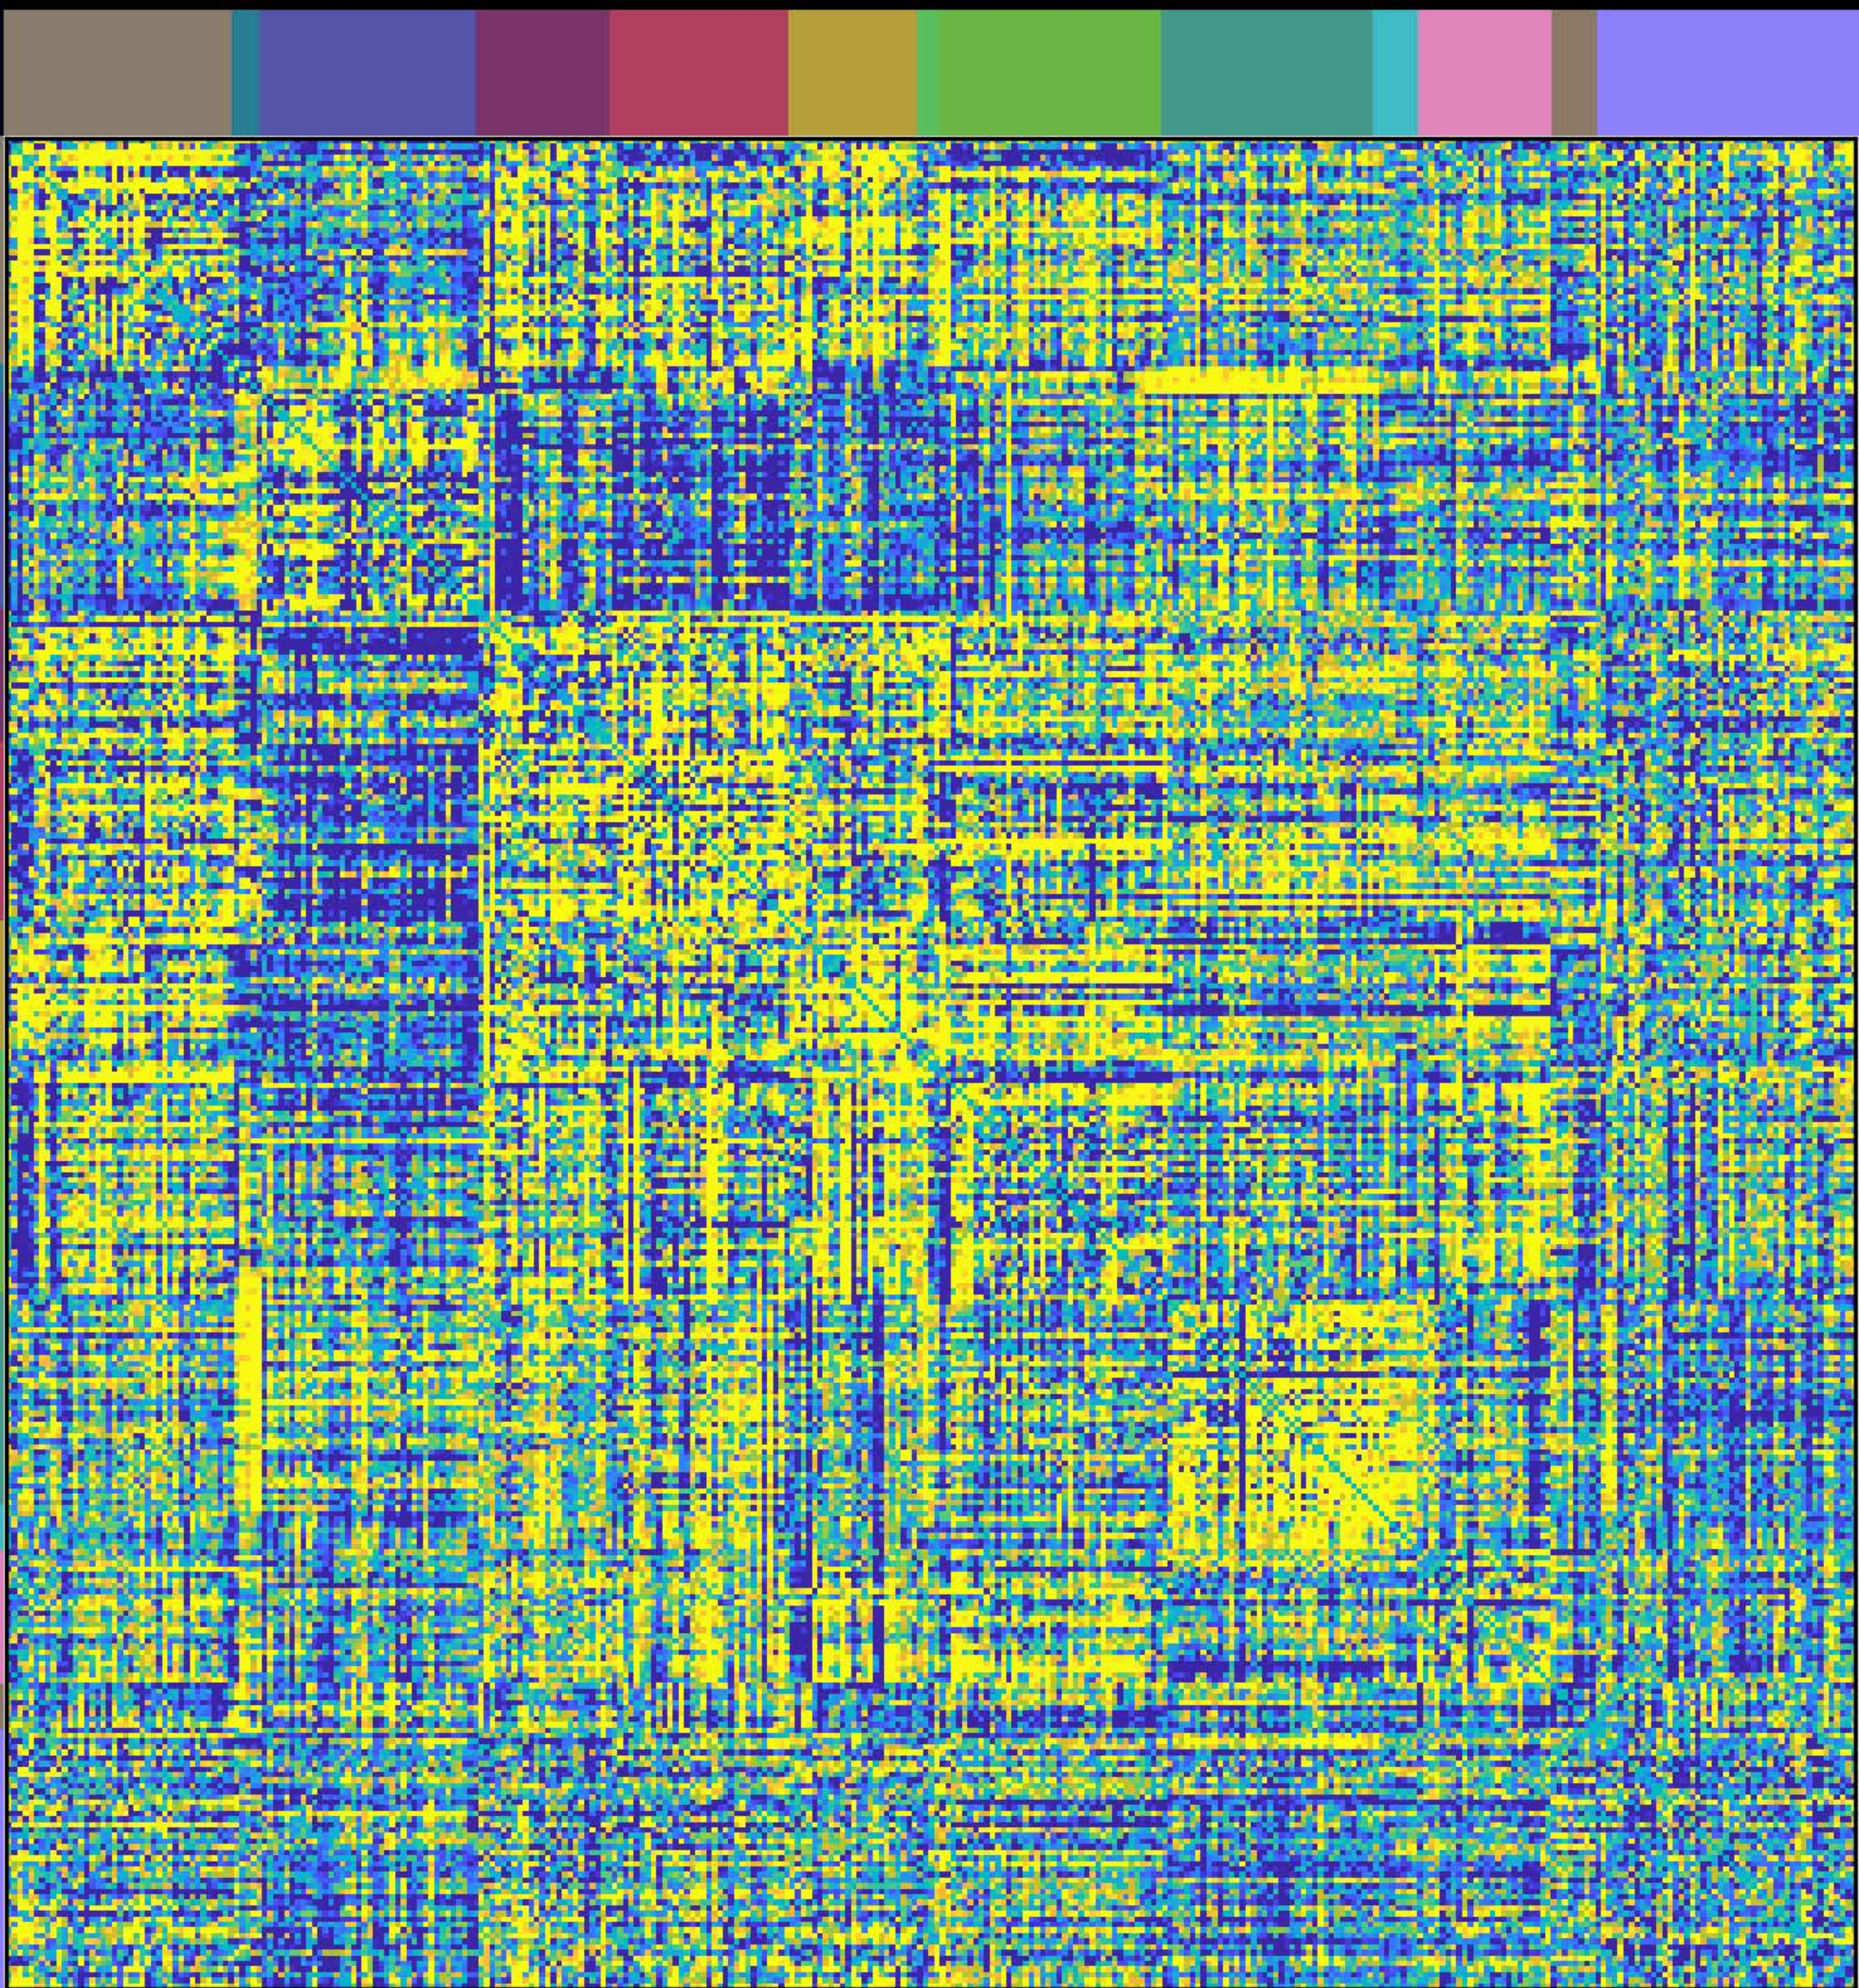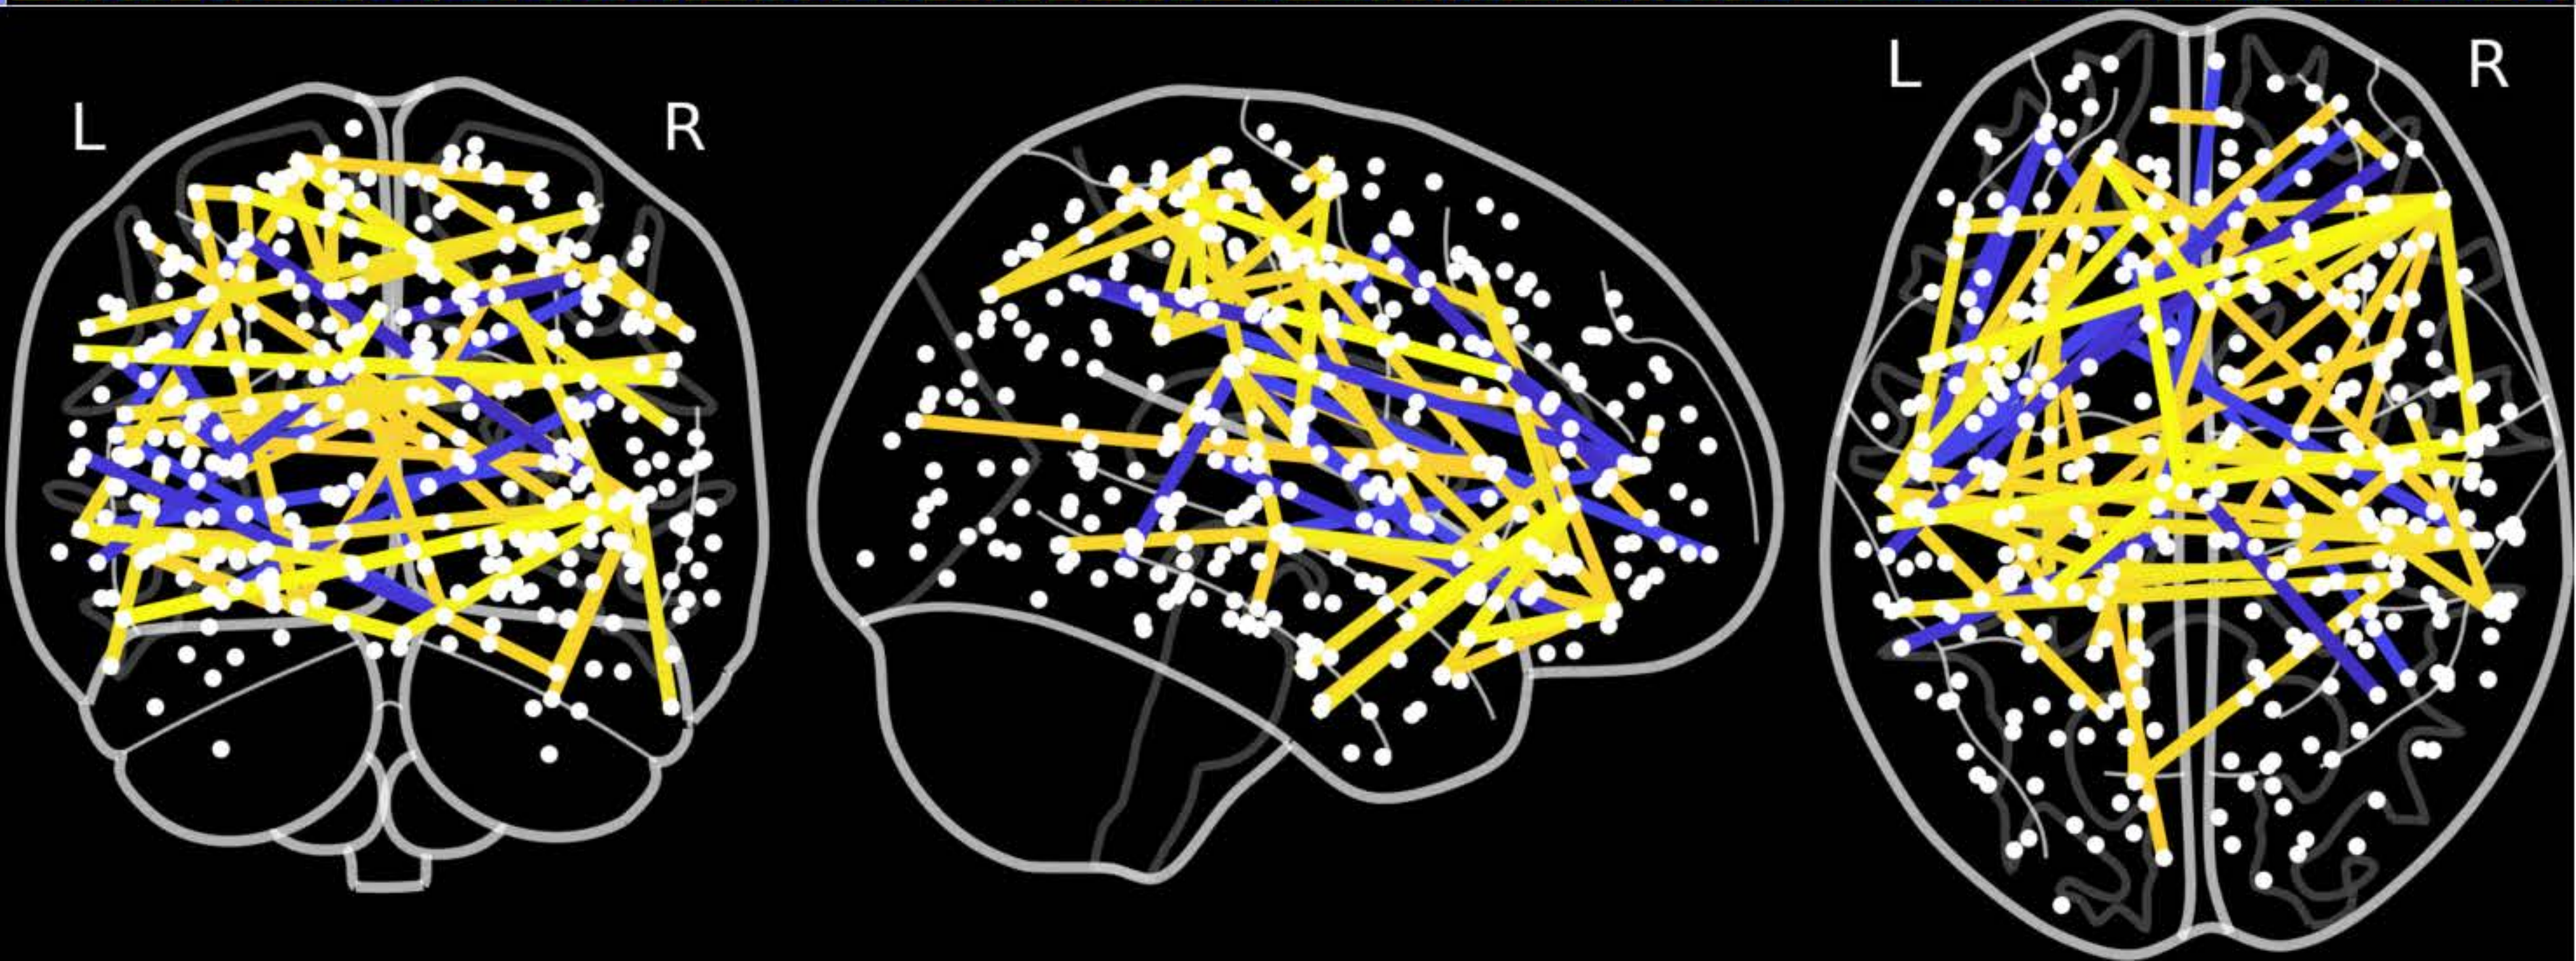



component\_16

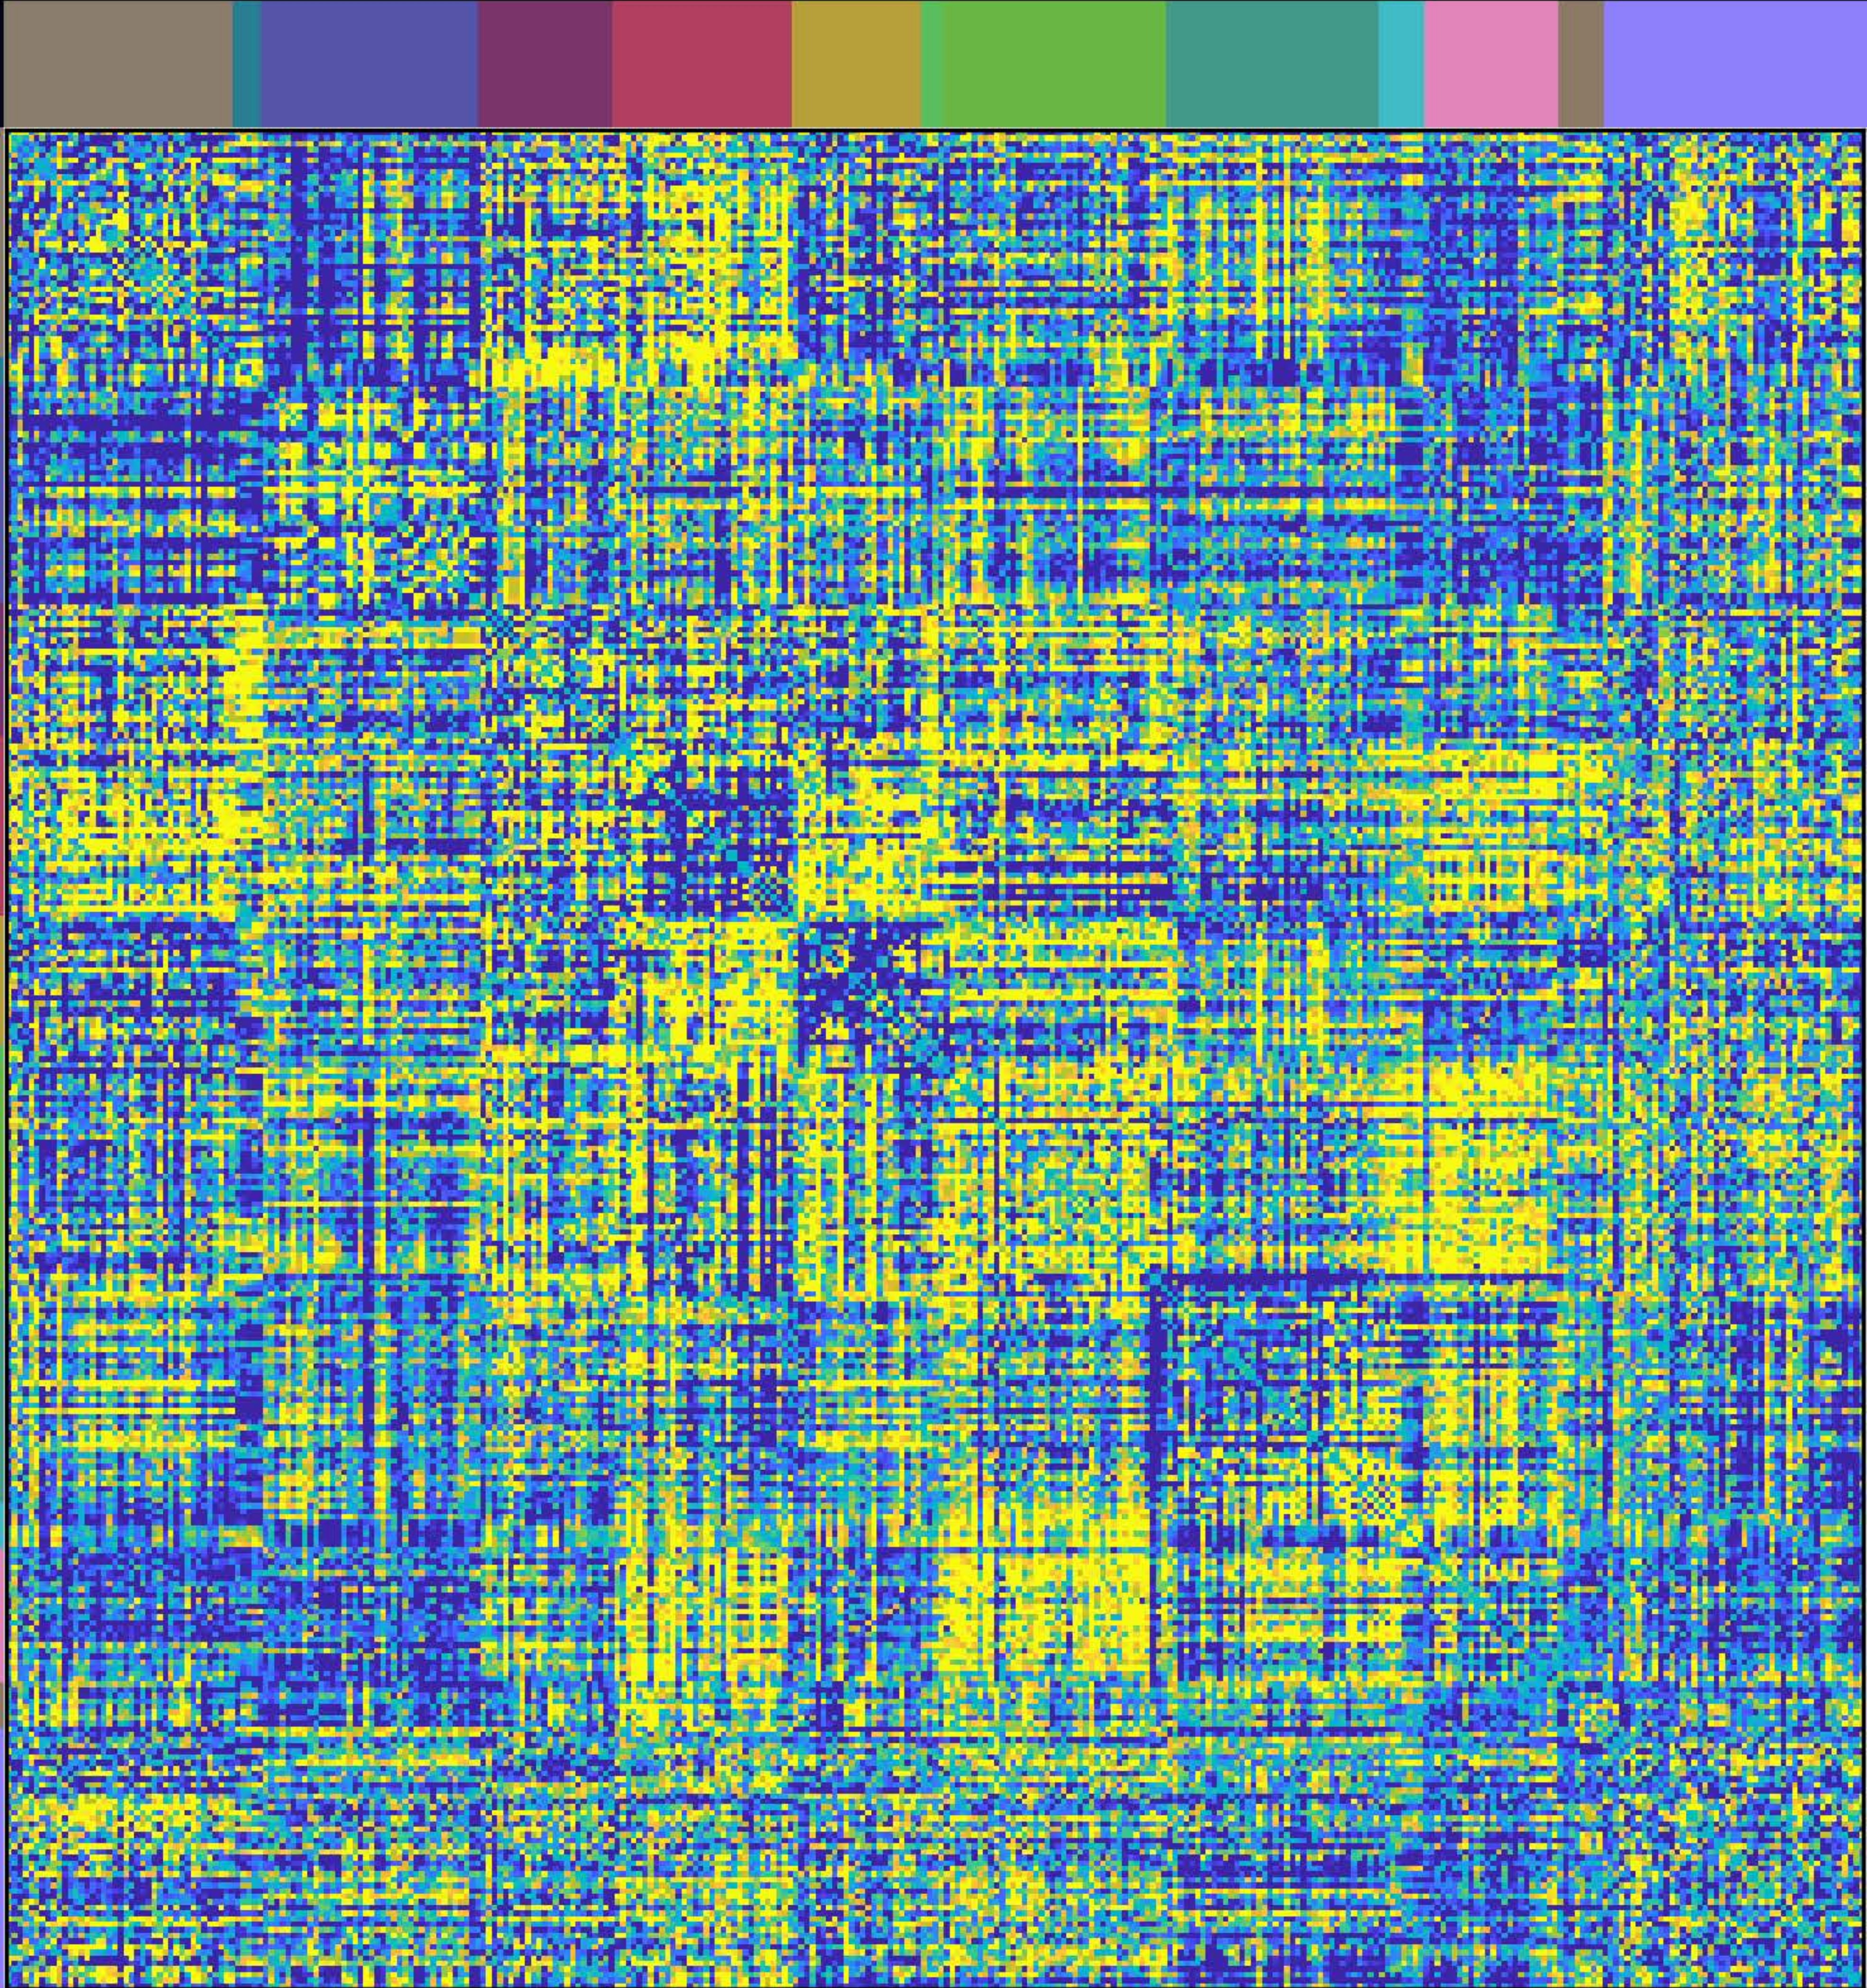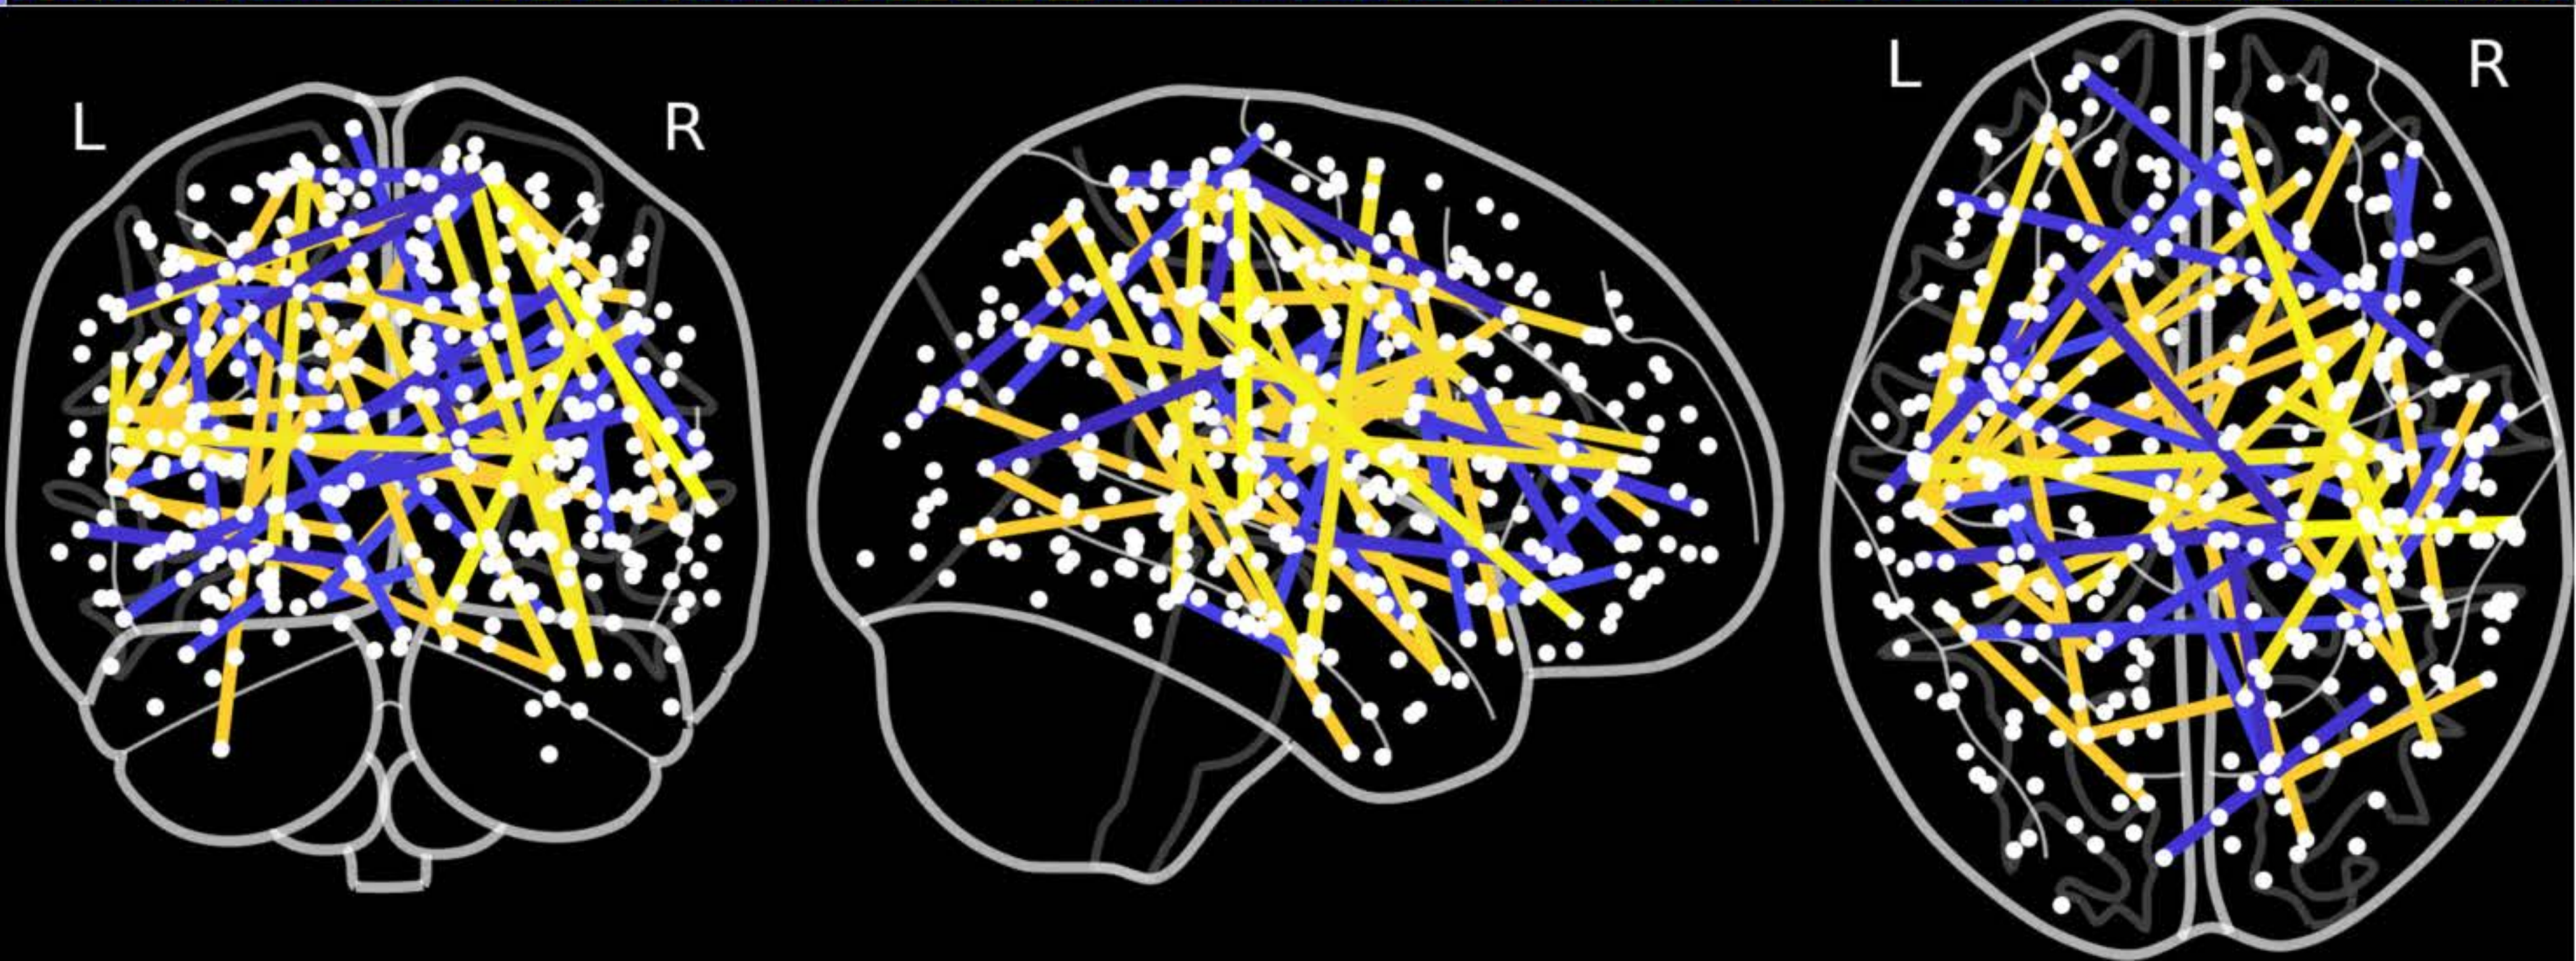



component\_17

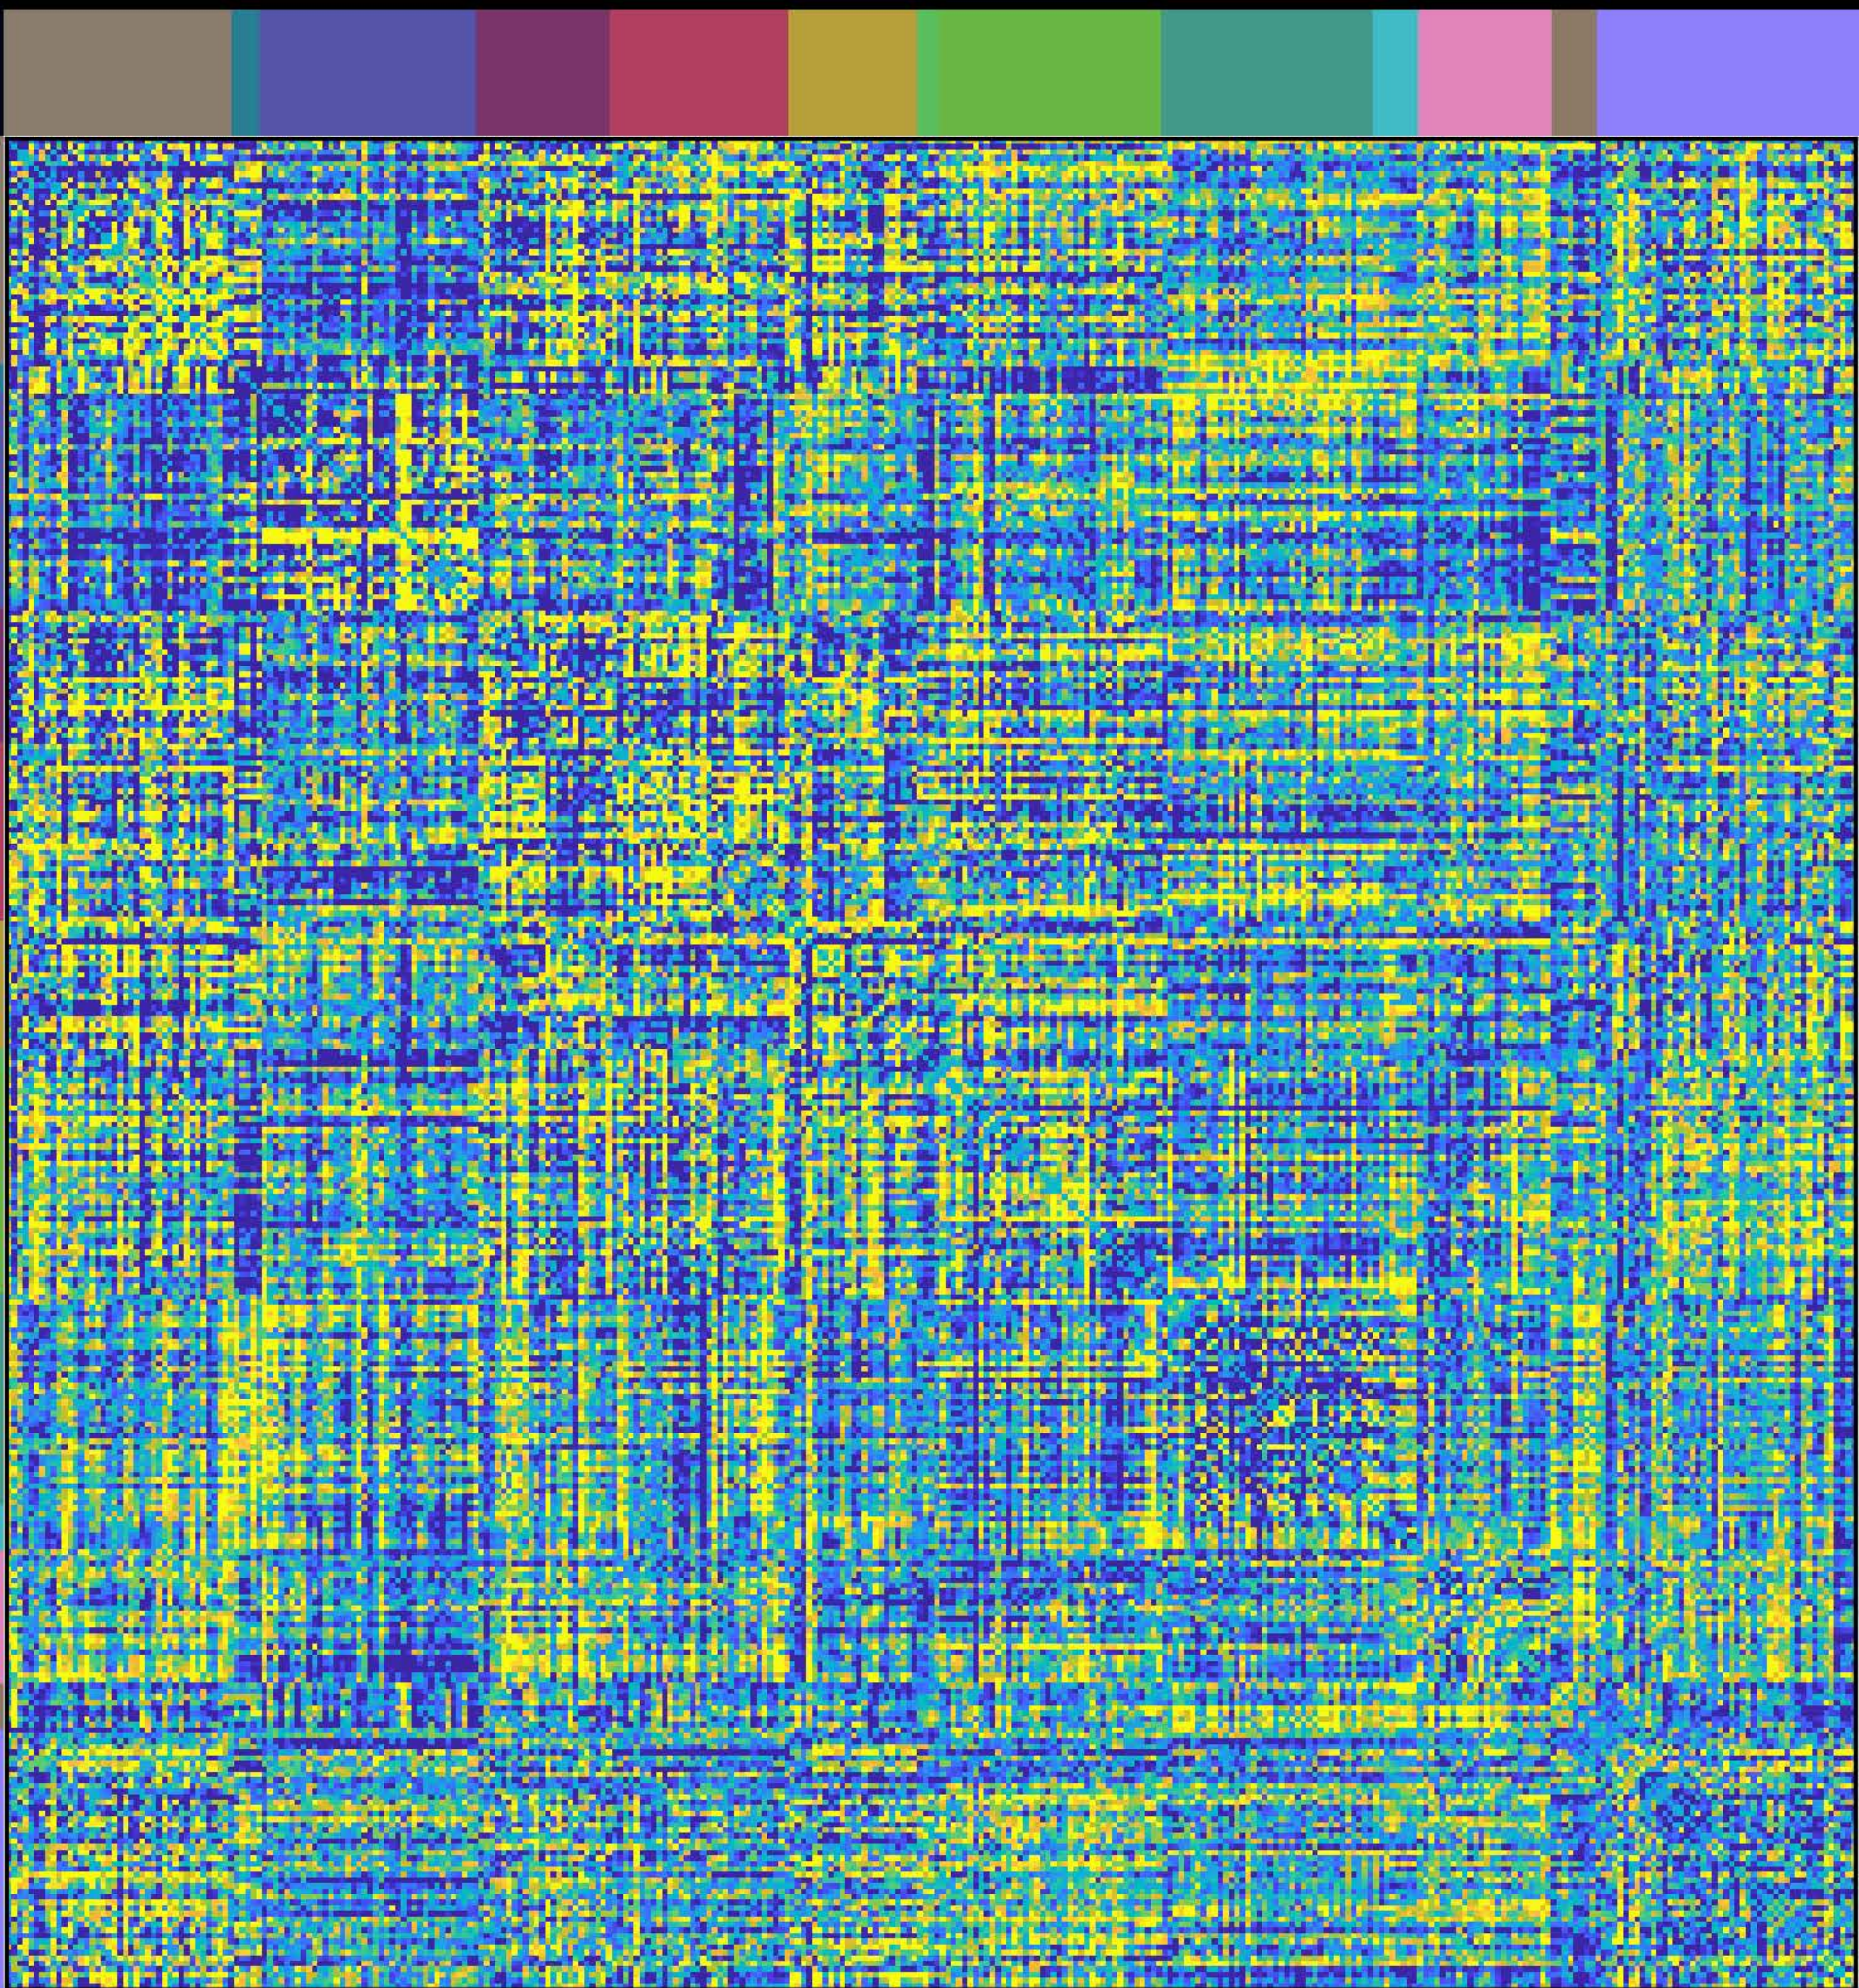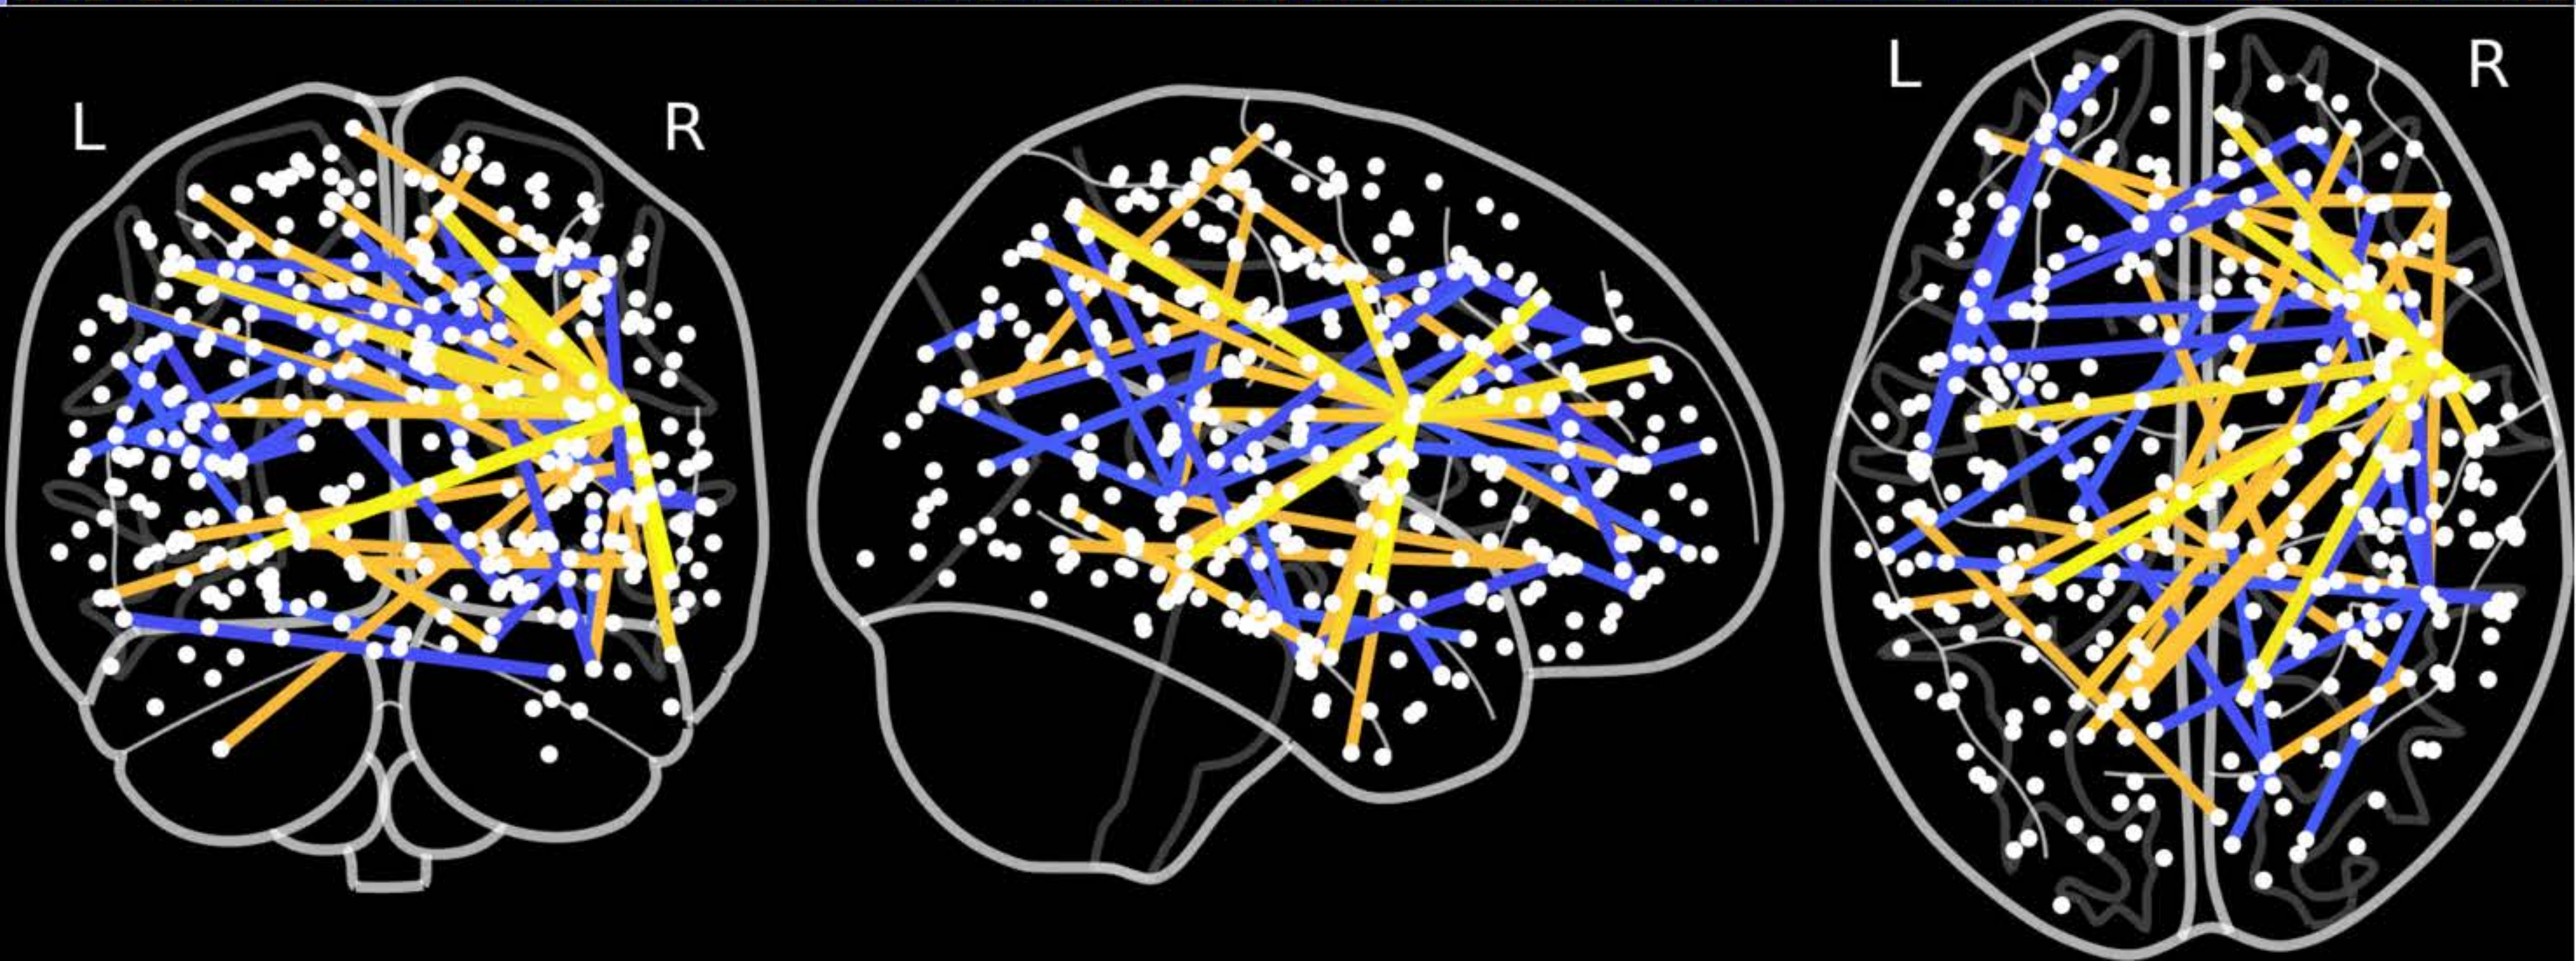



component\_18

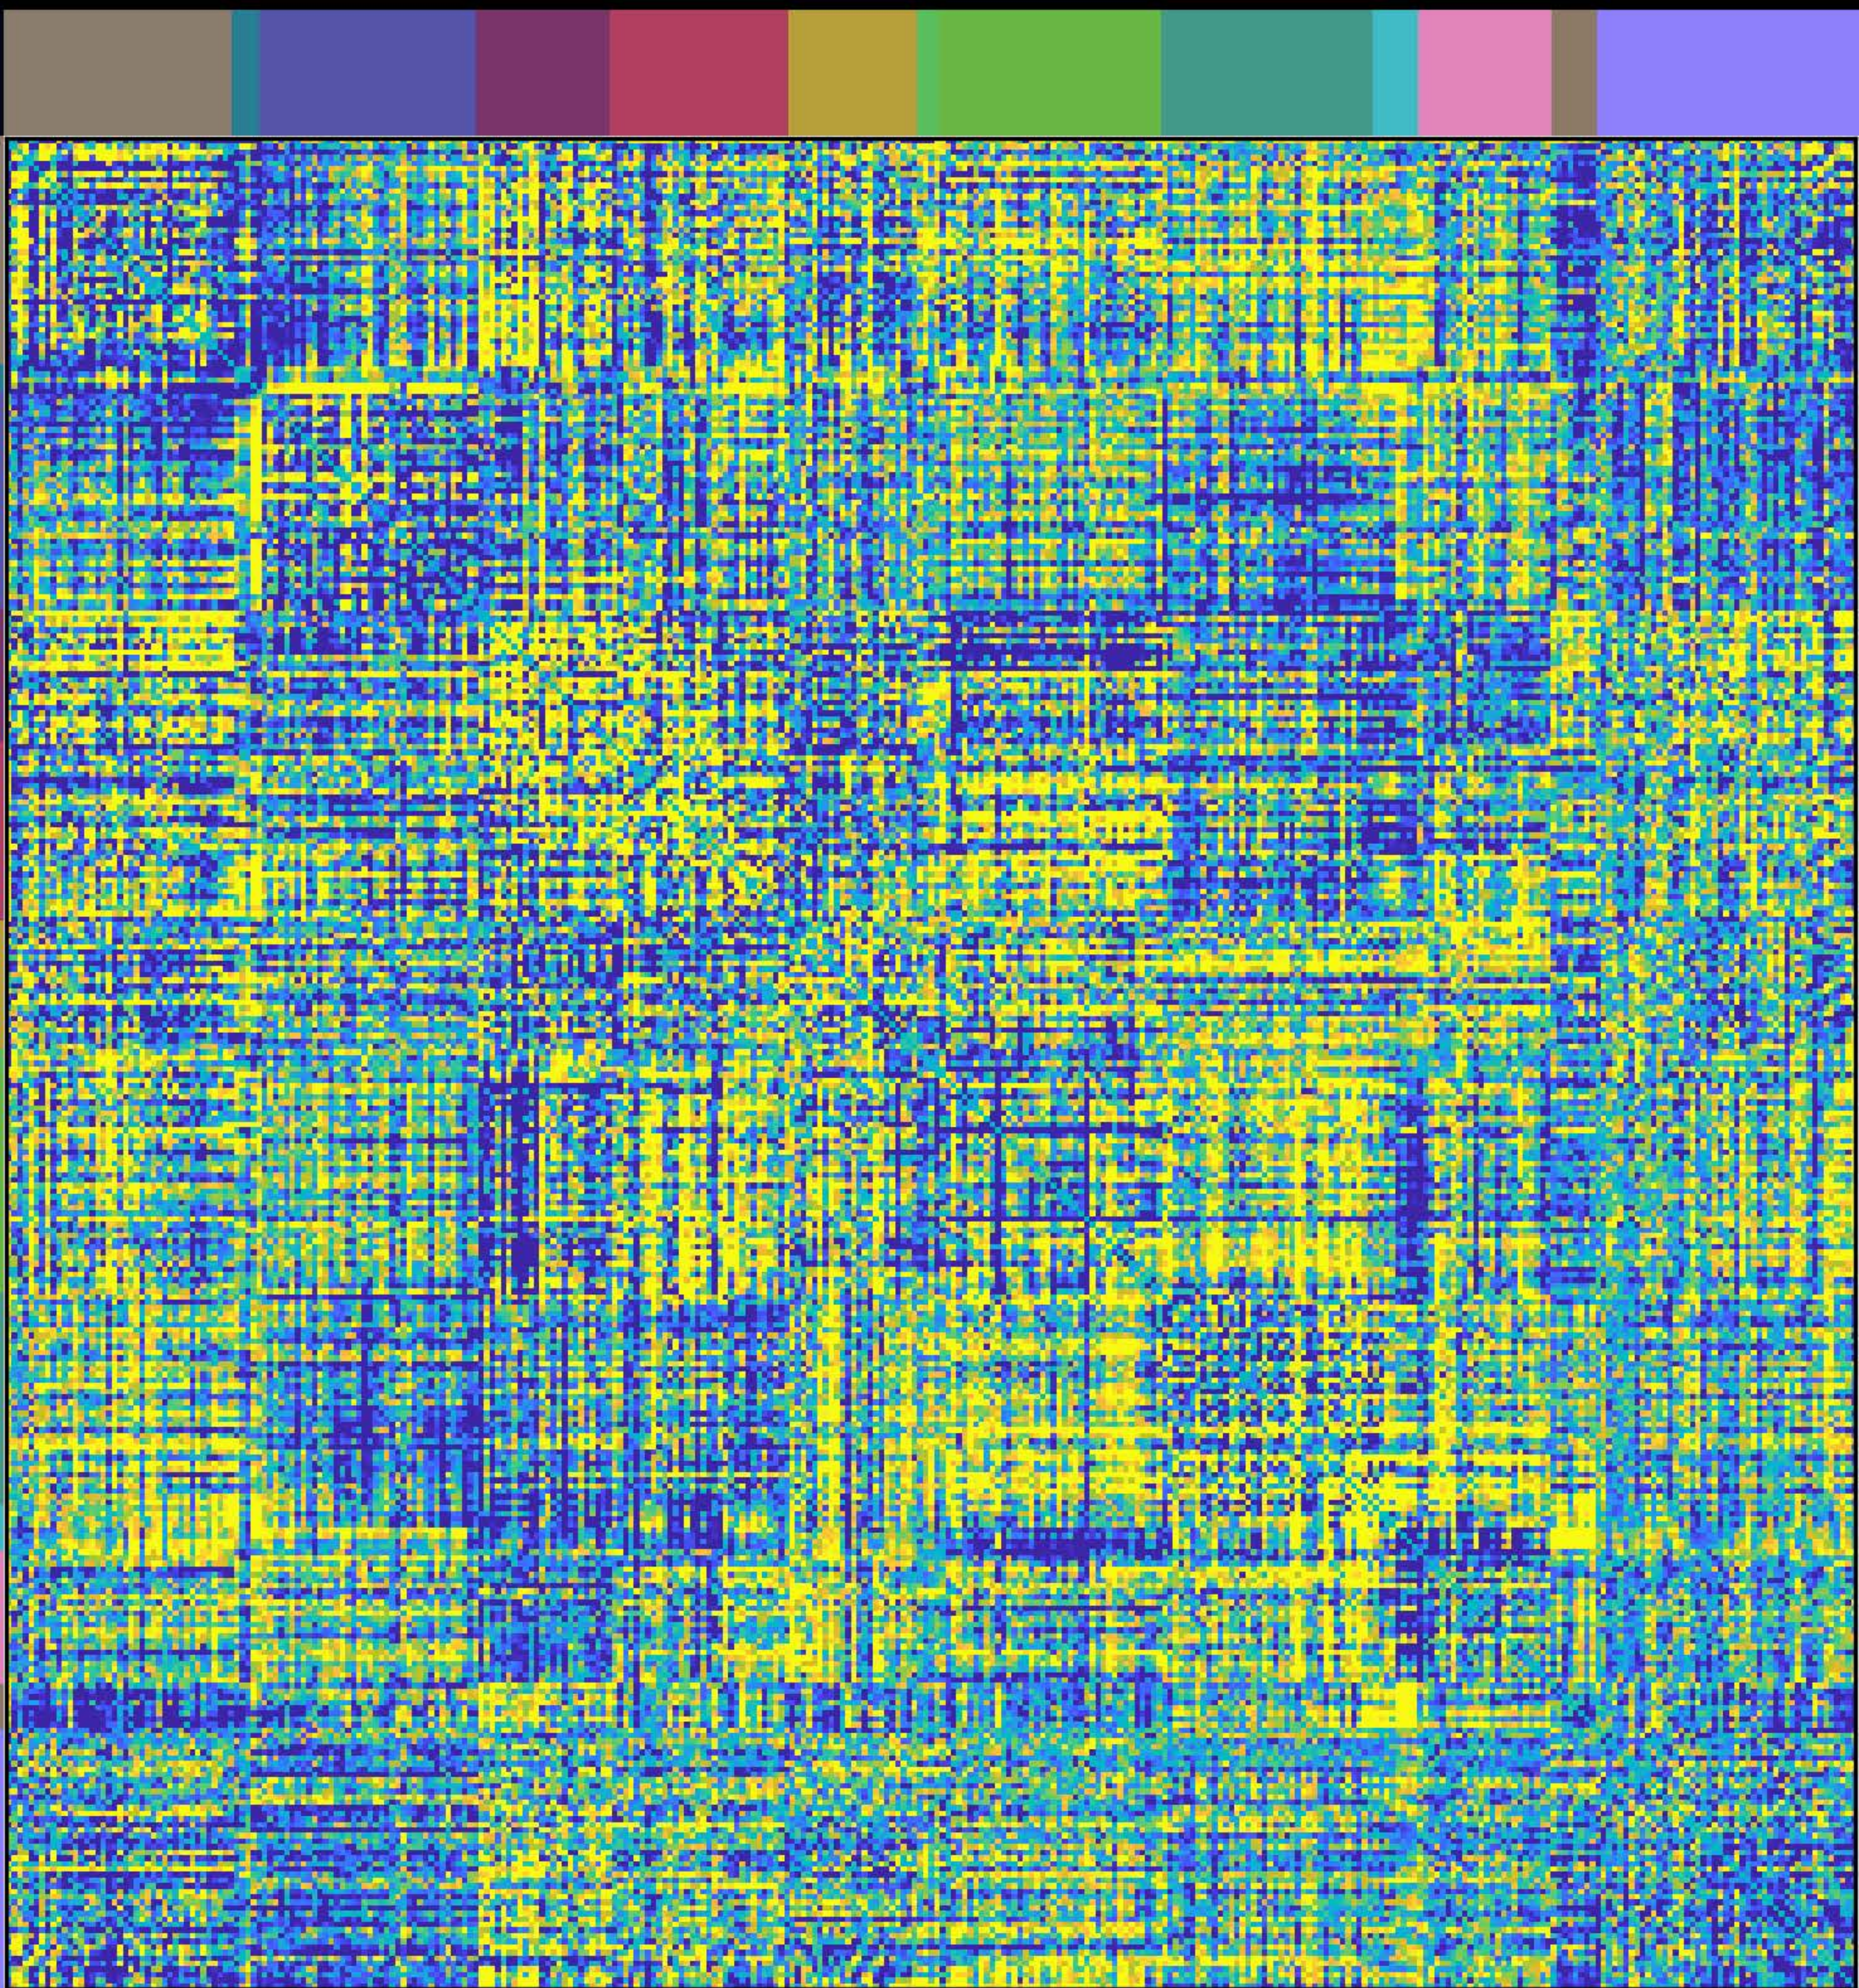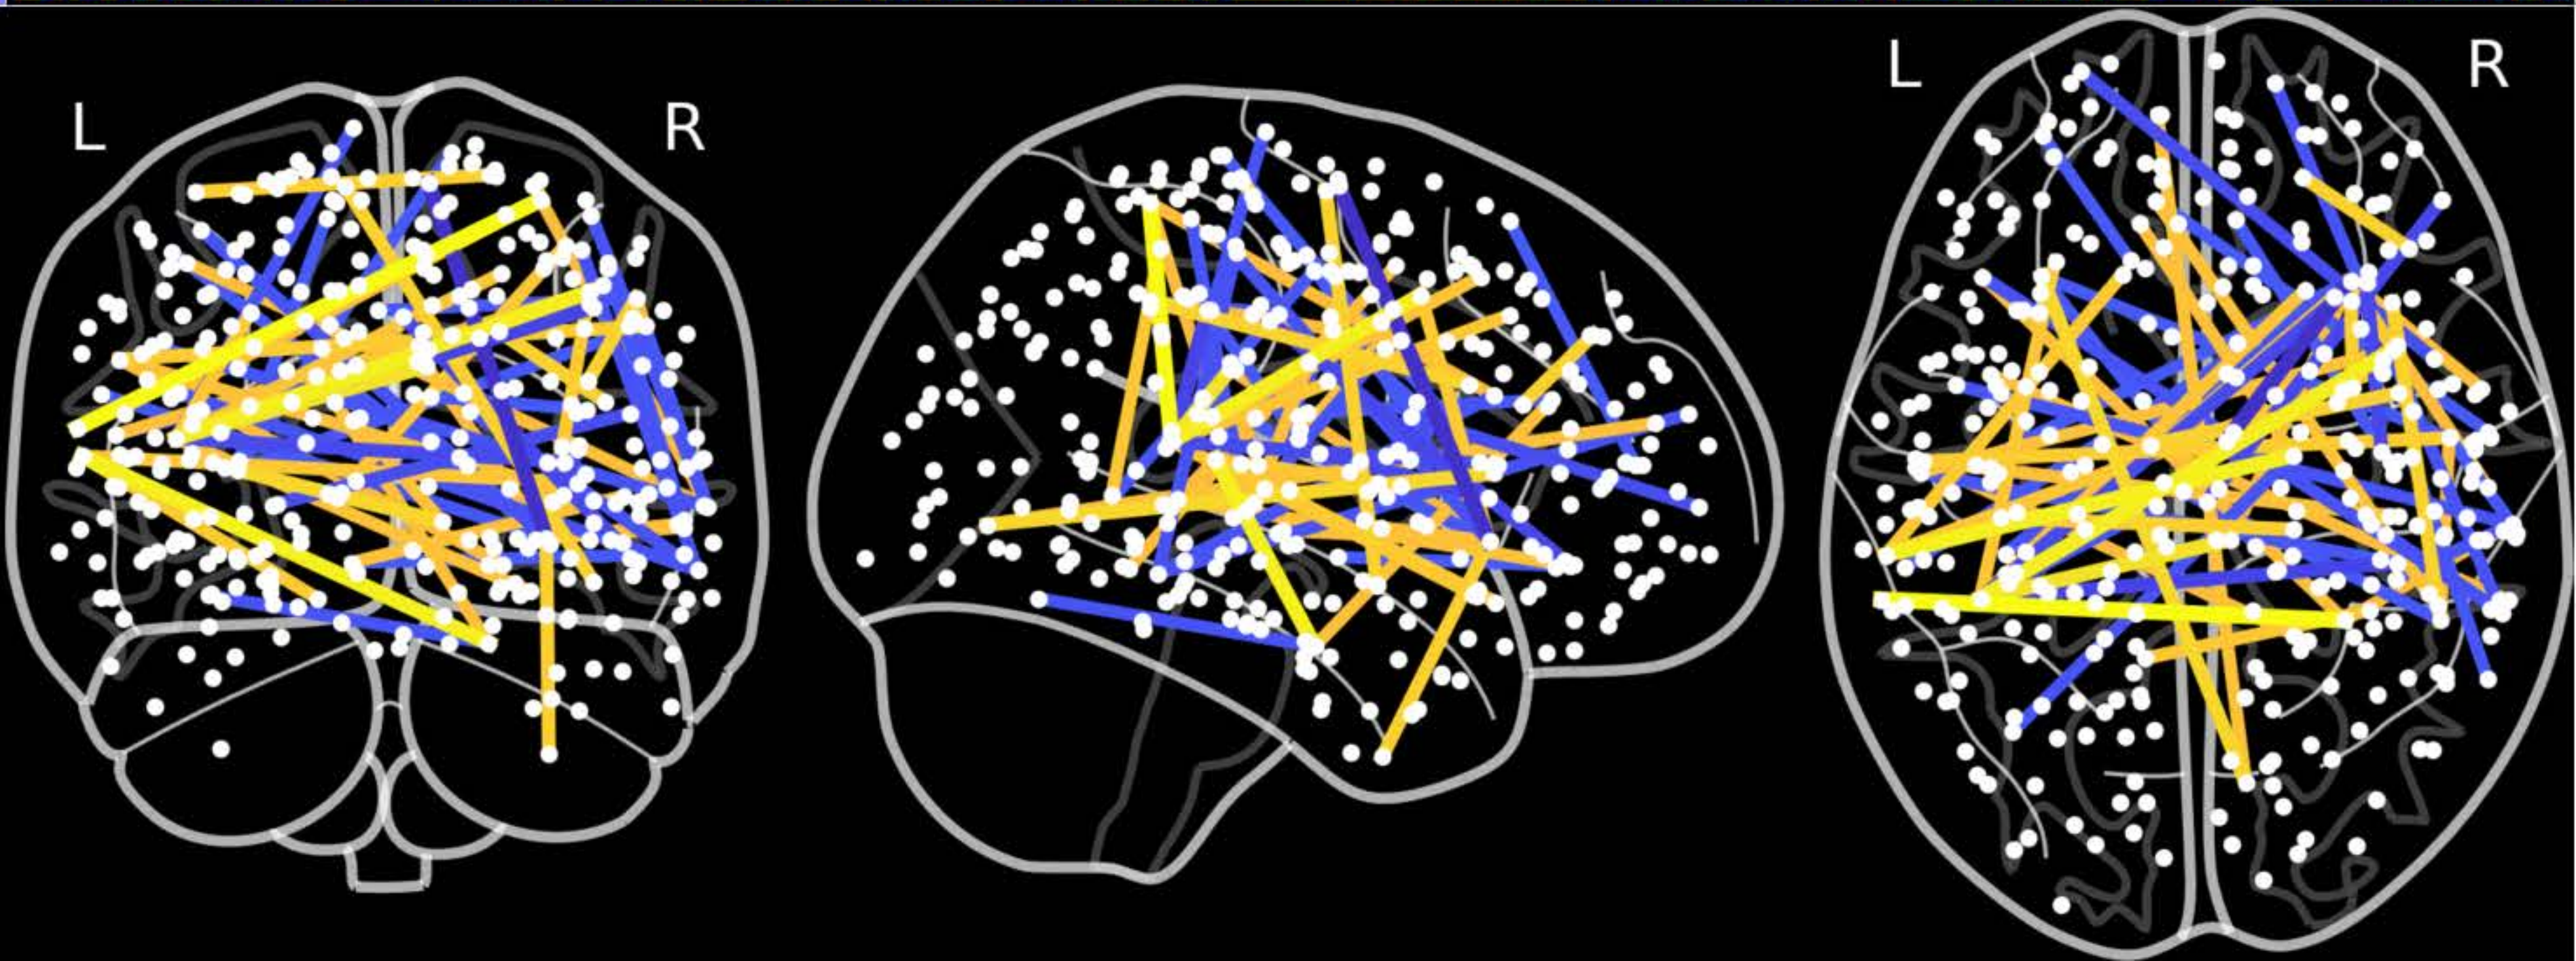



# component\_19

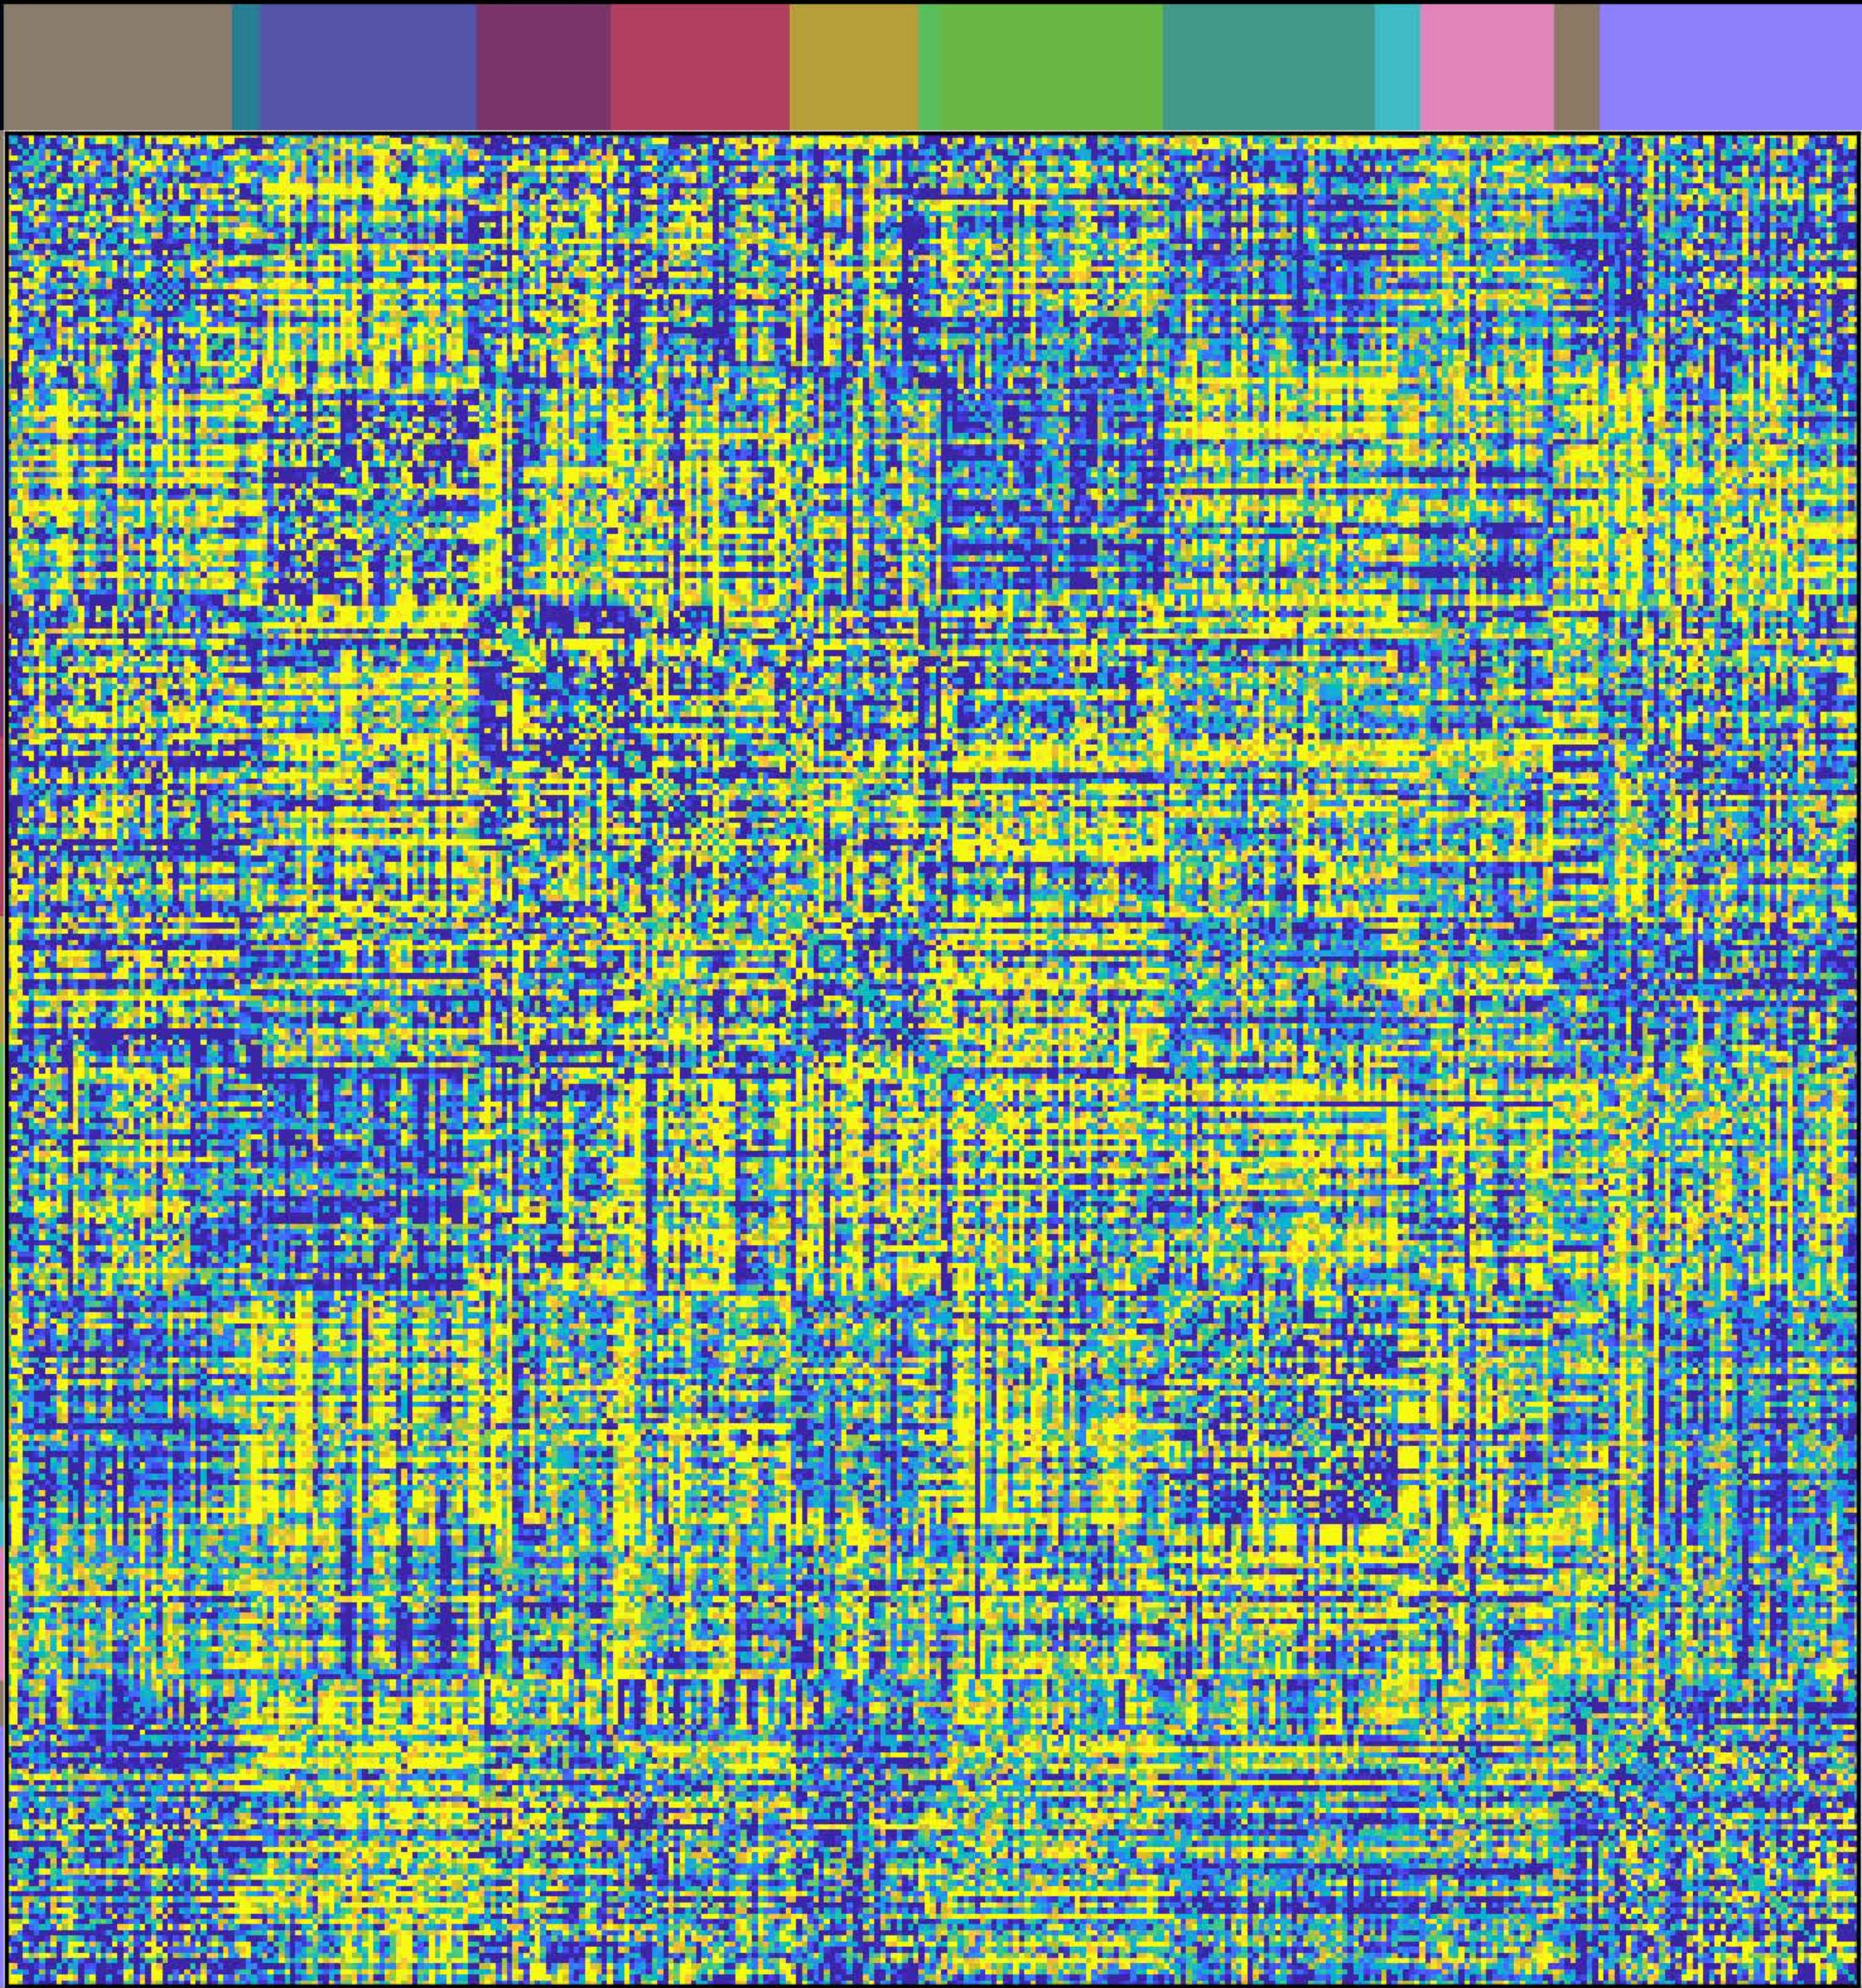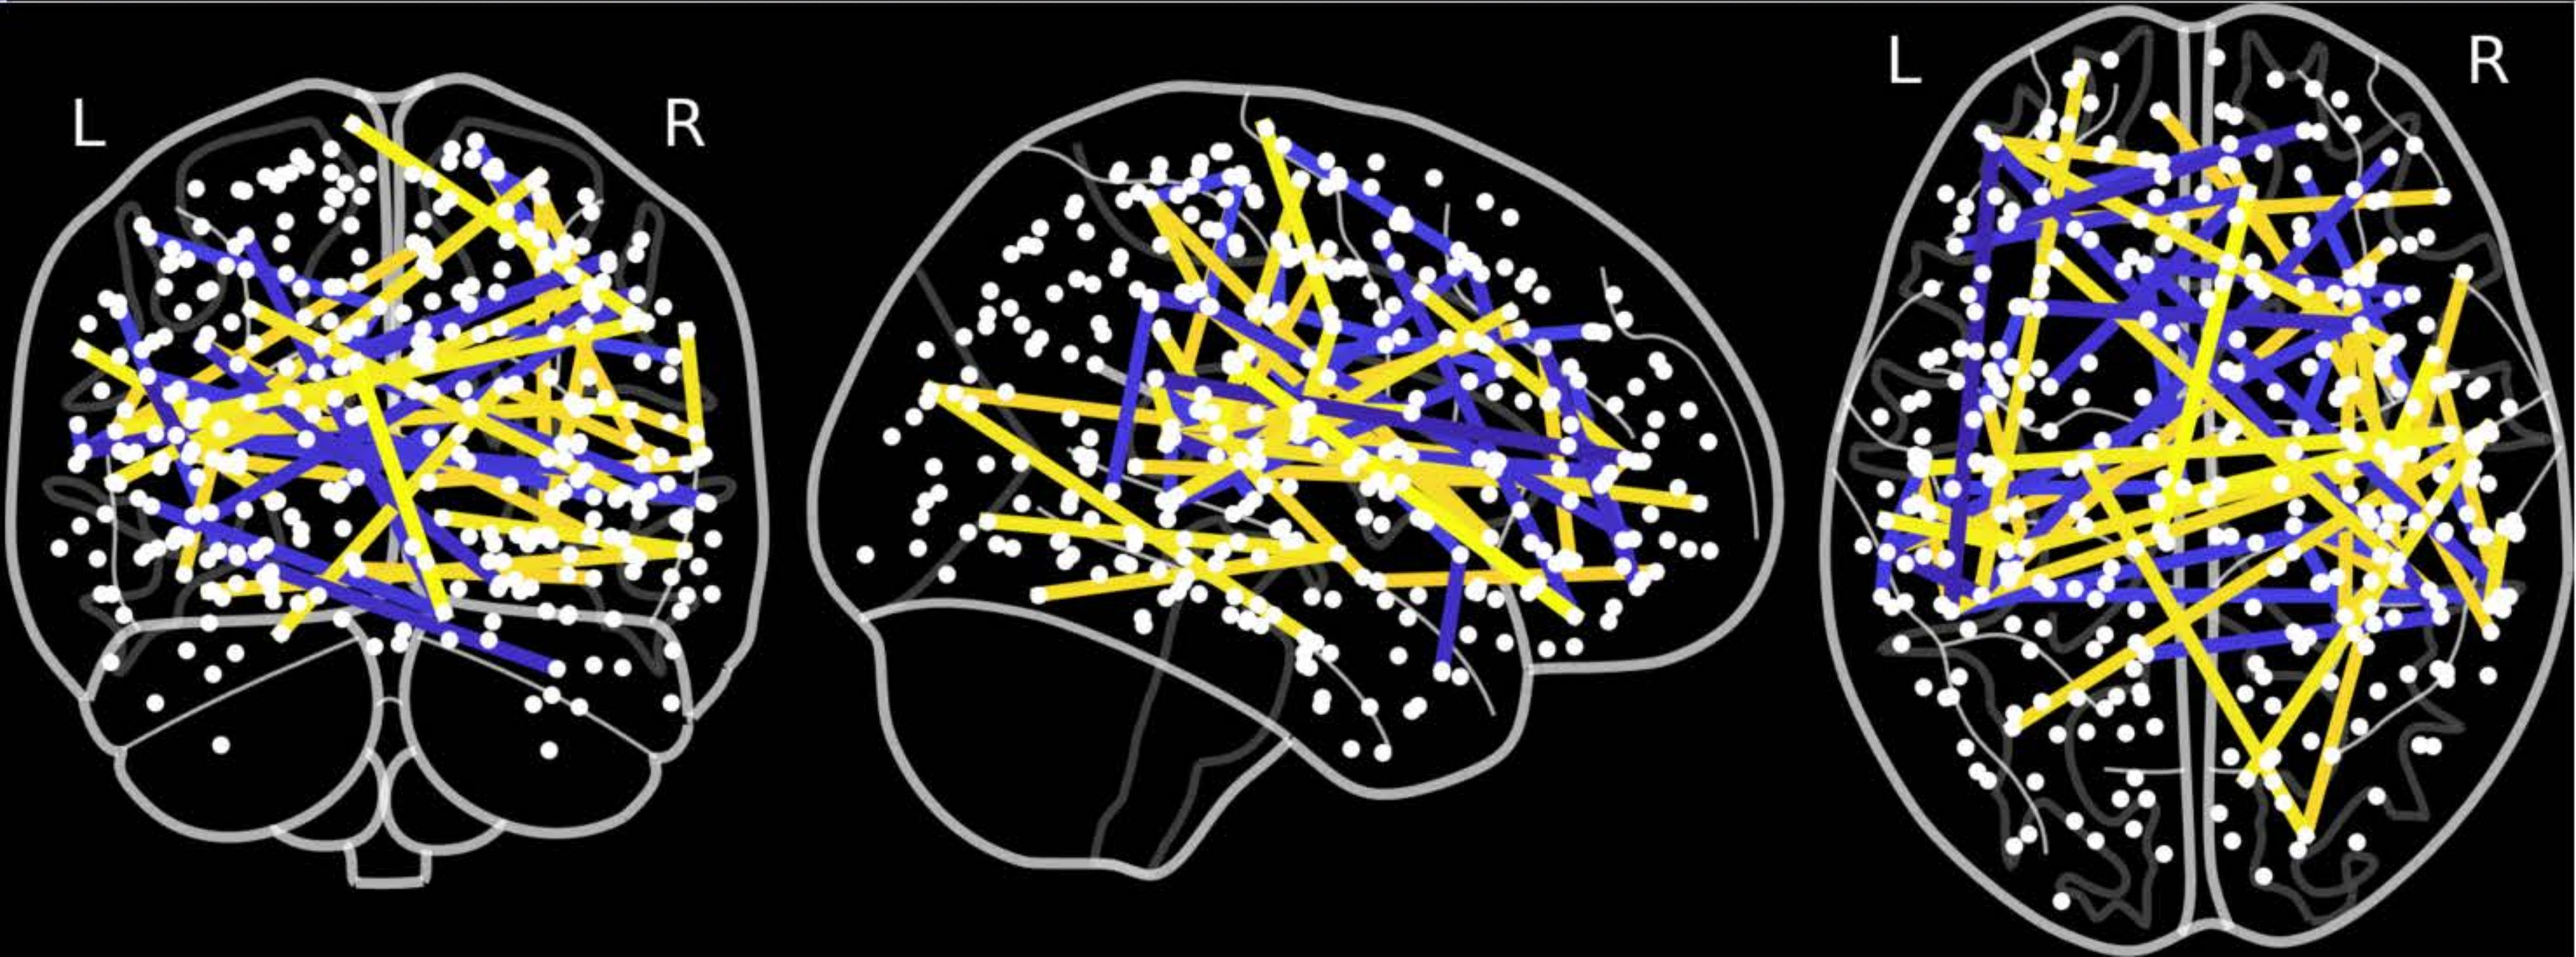



component\_20

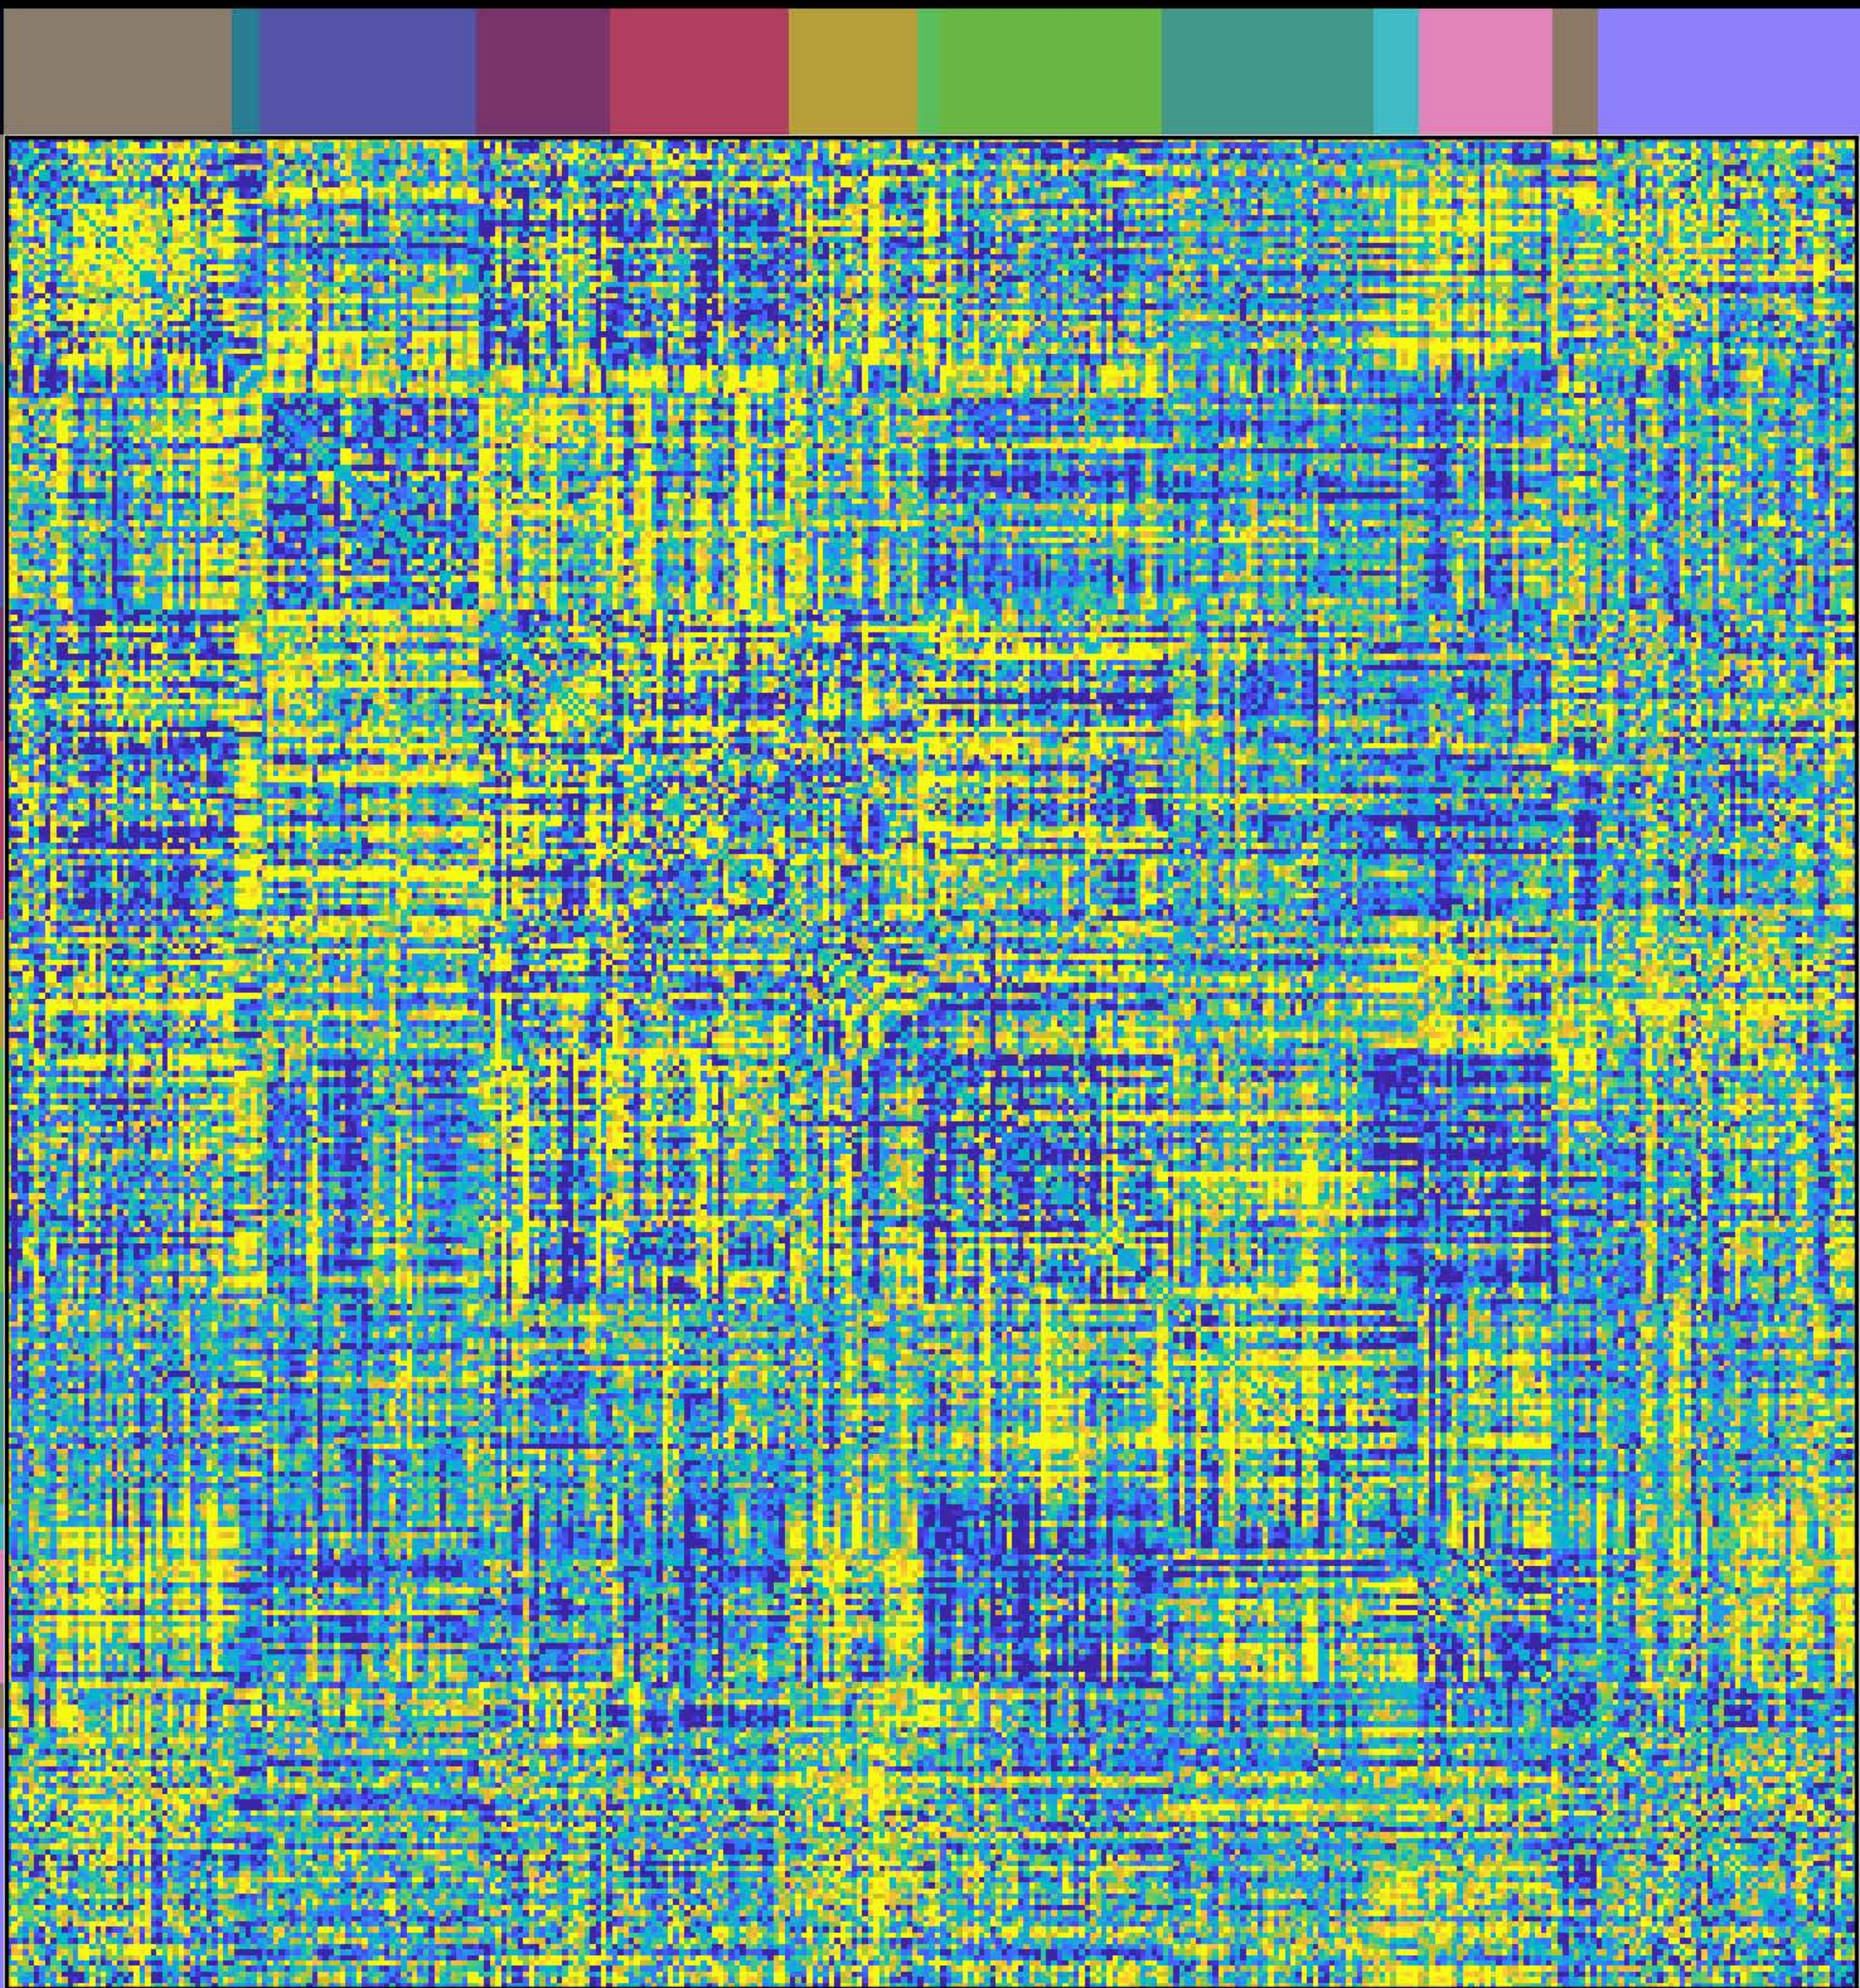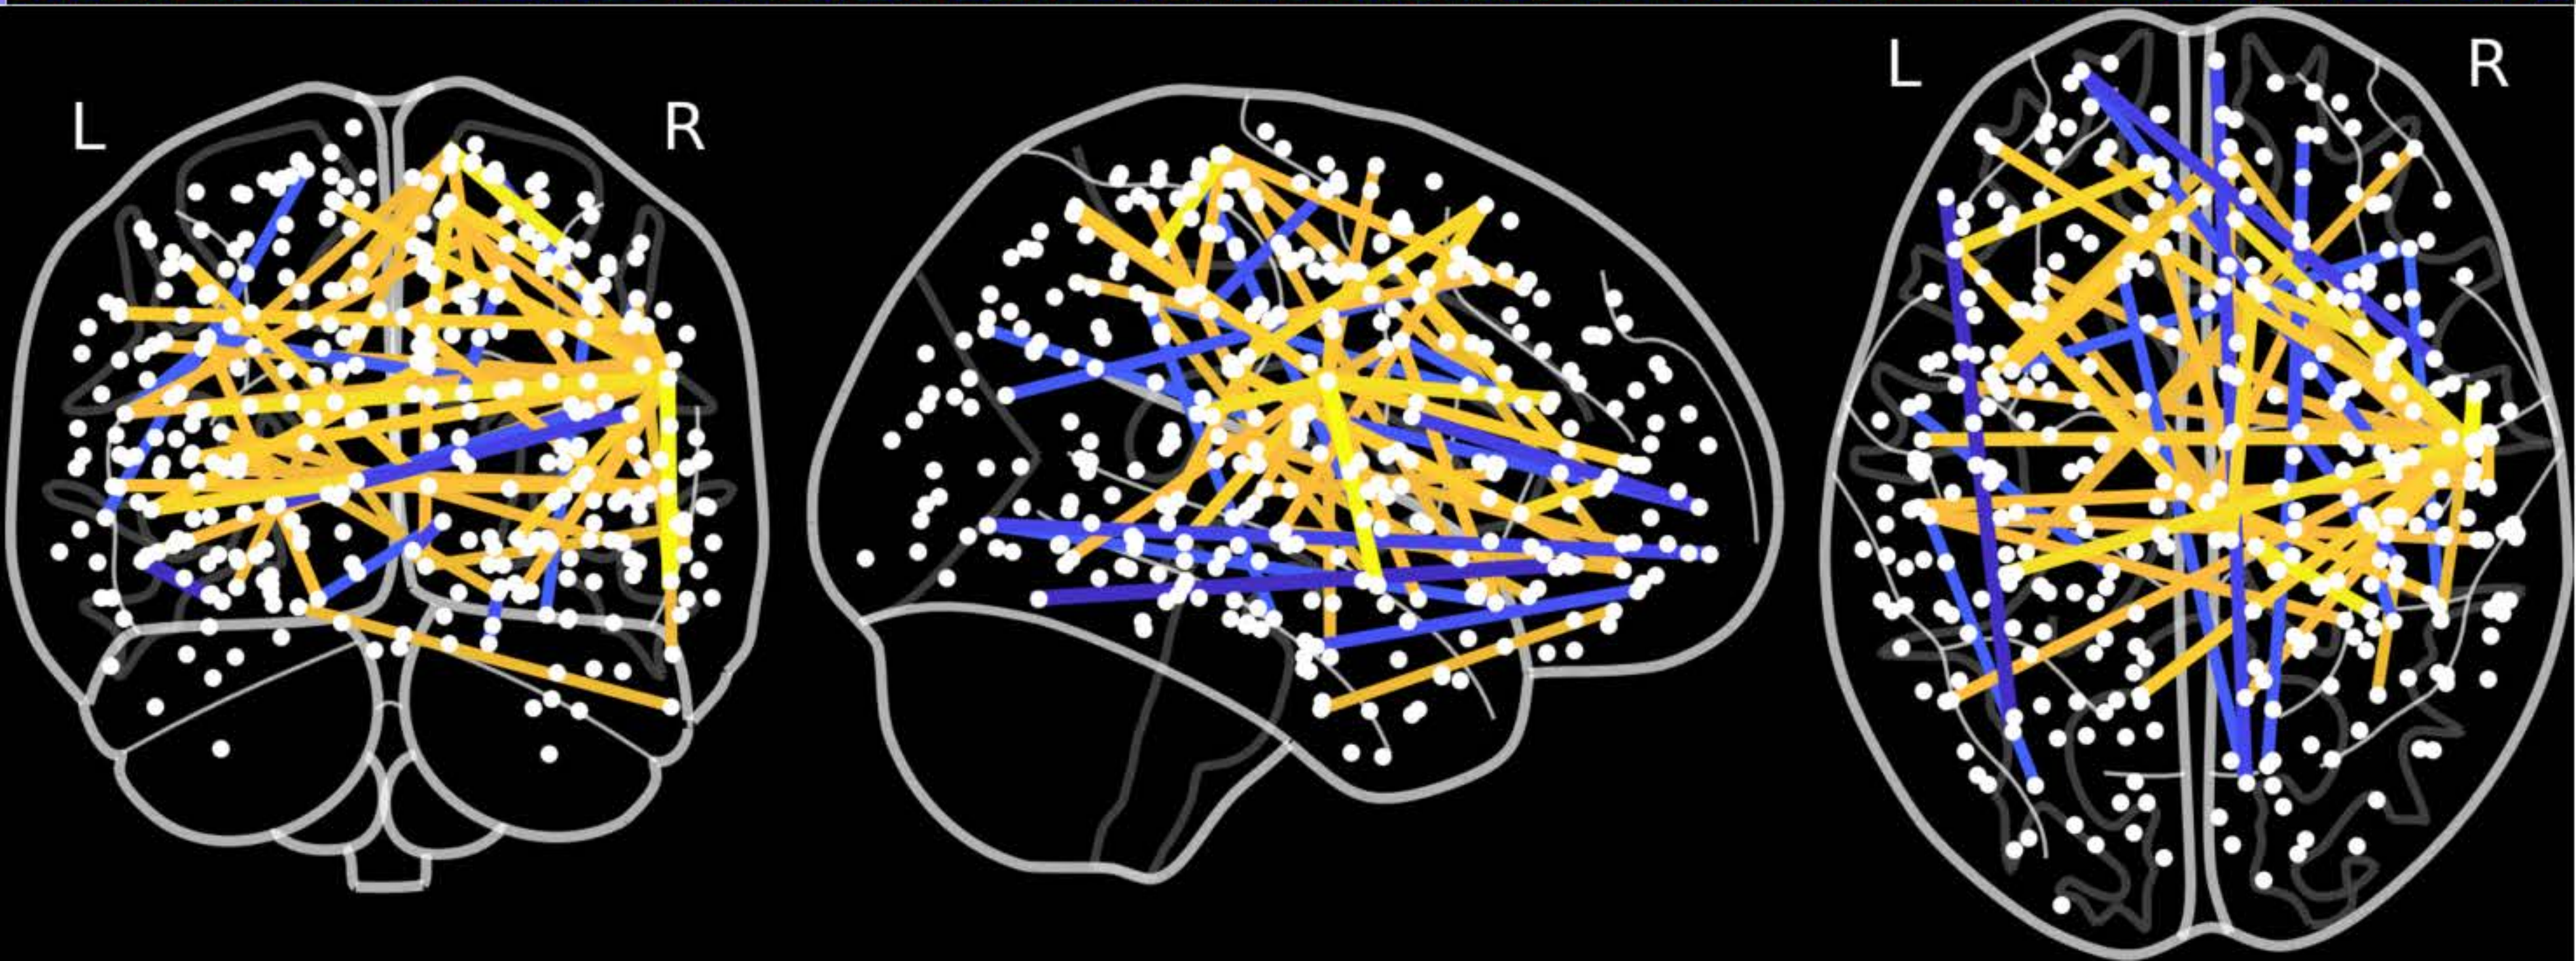



component\_21

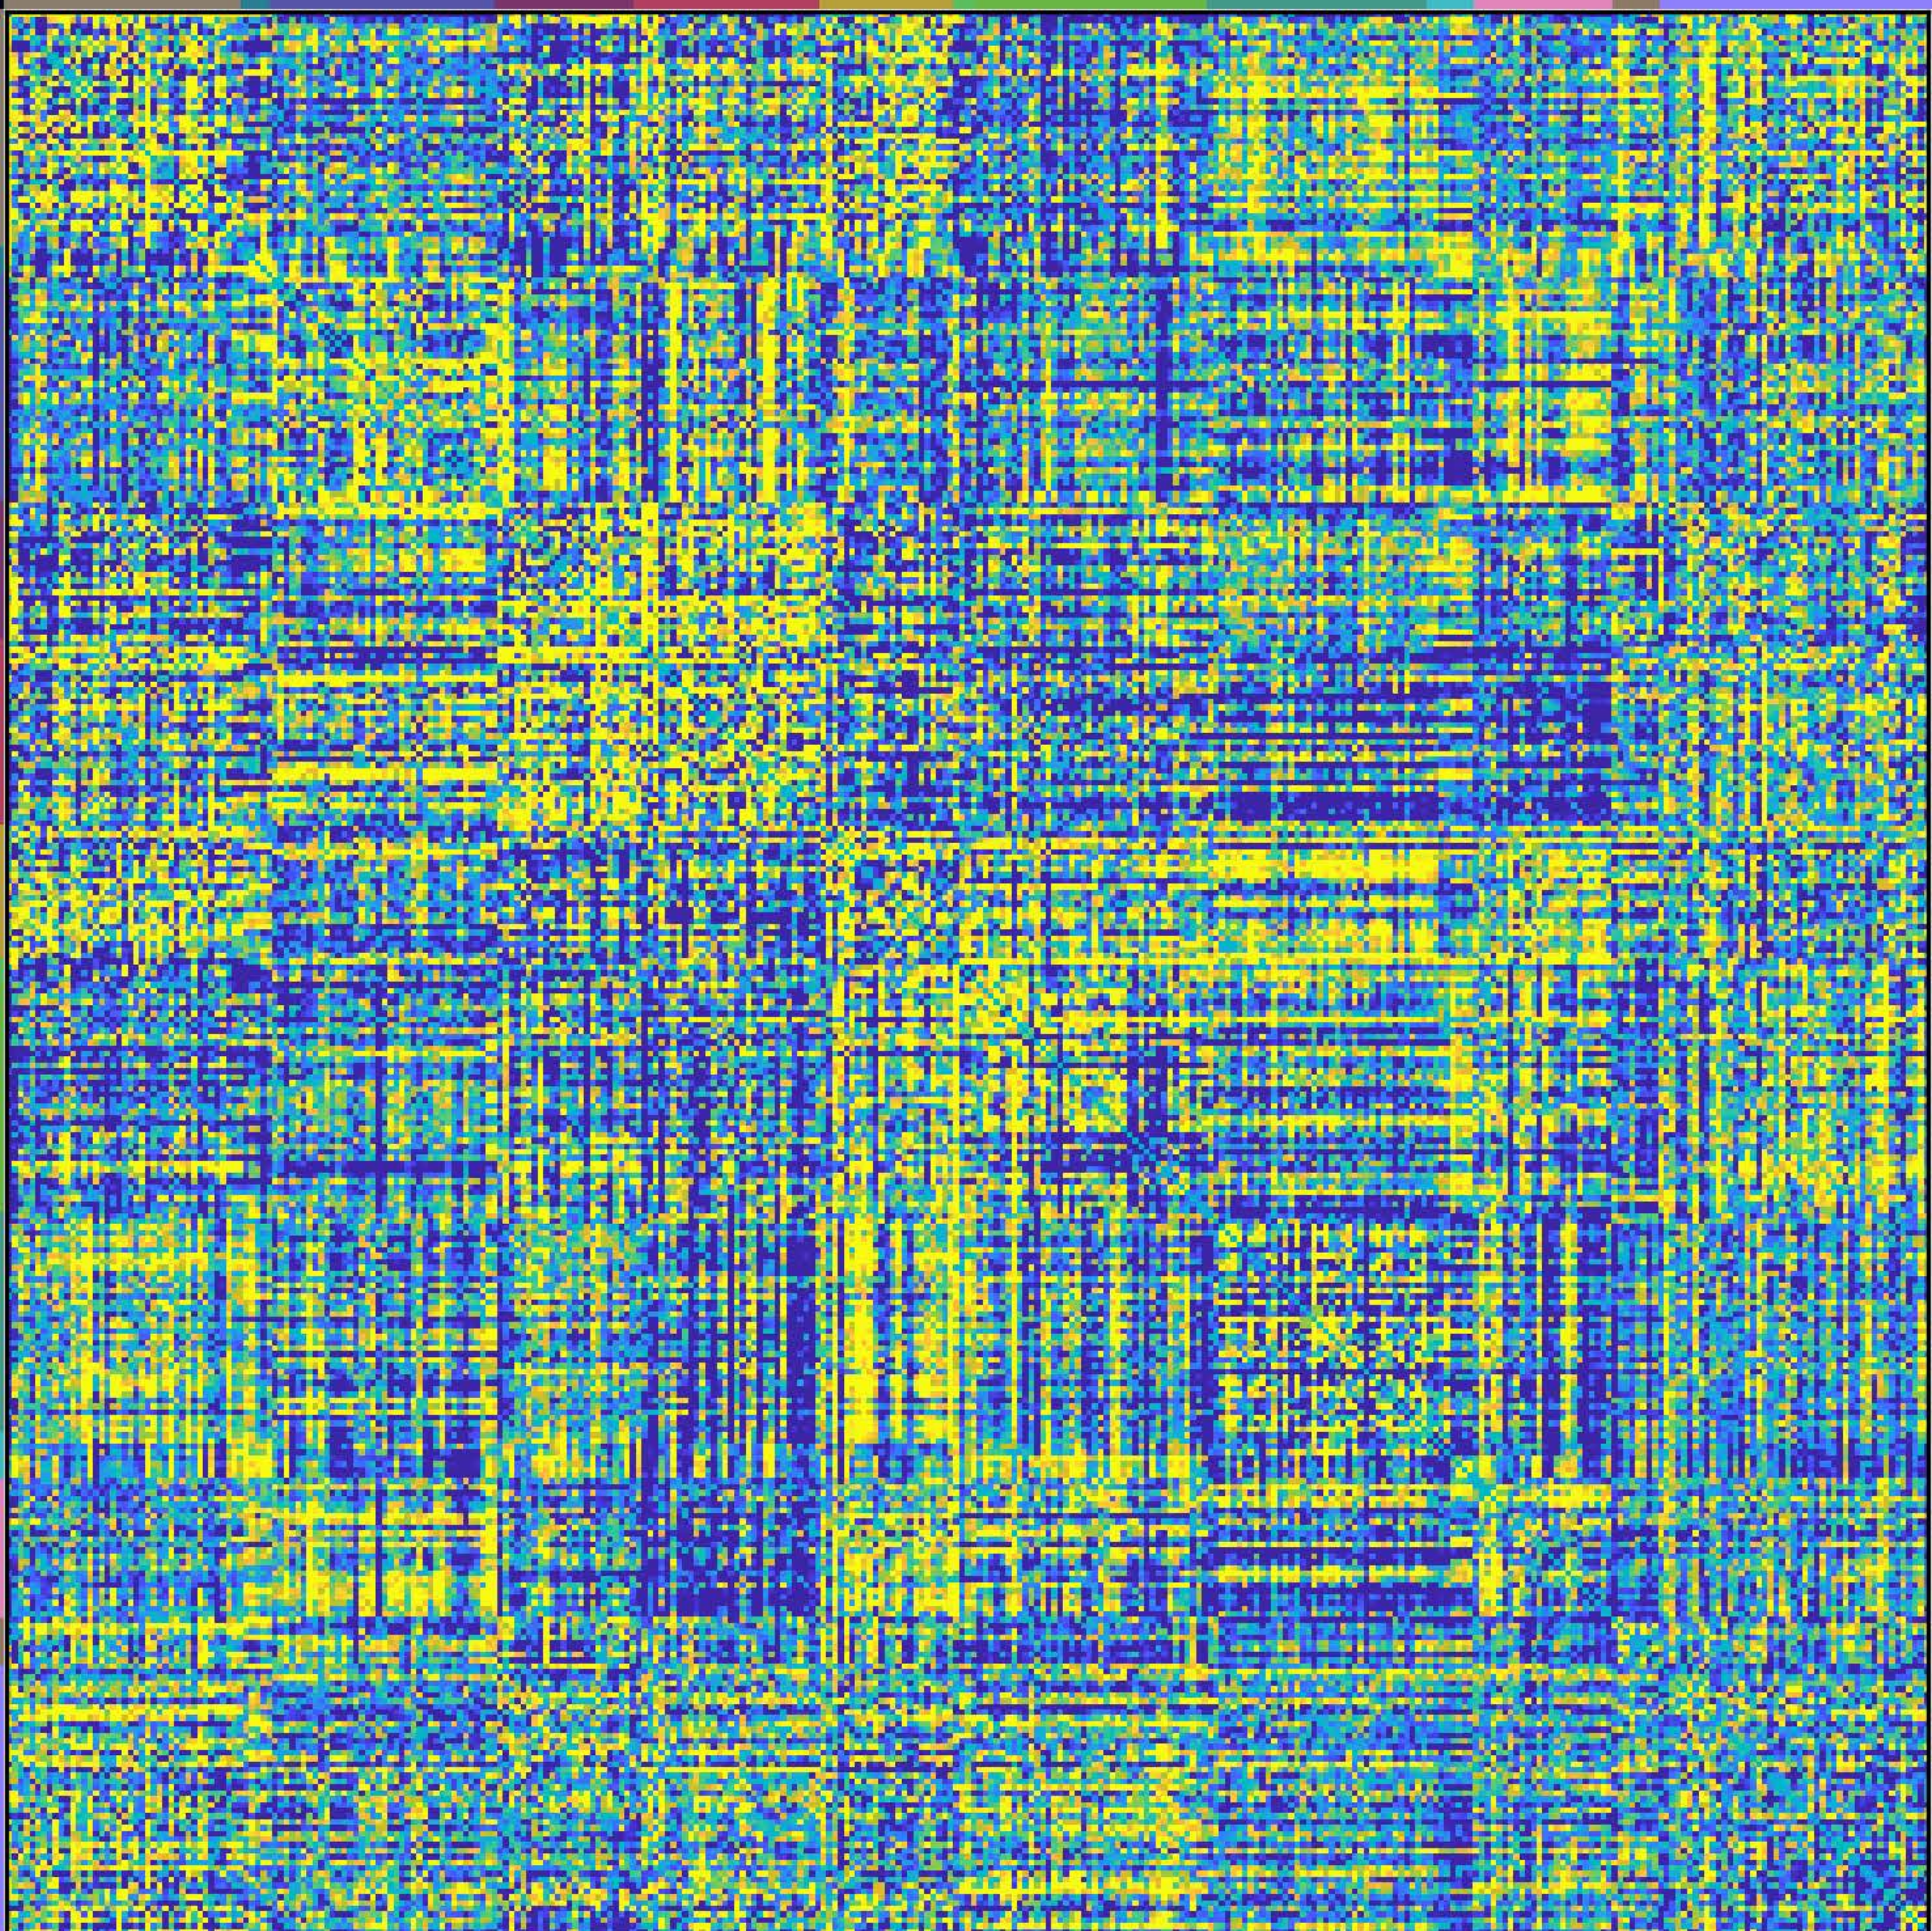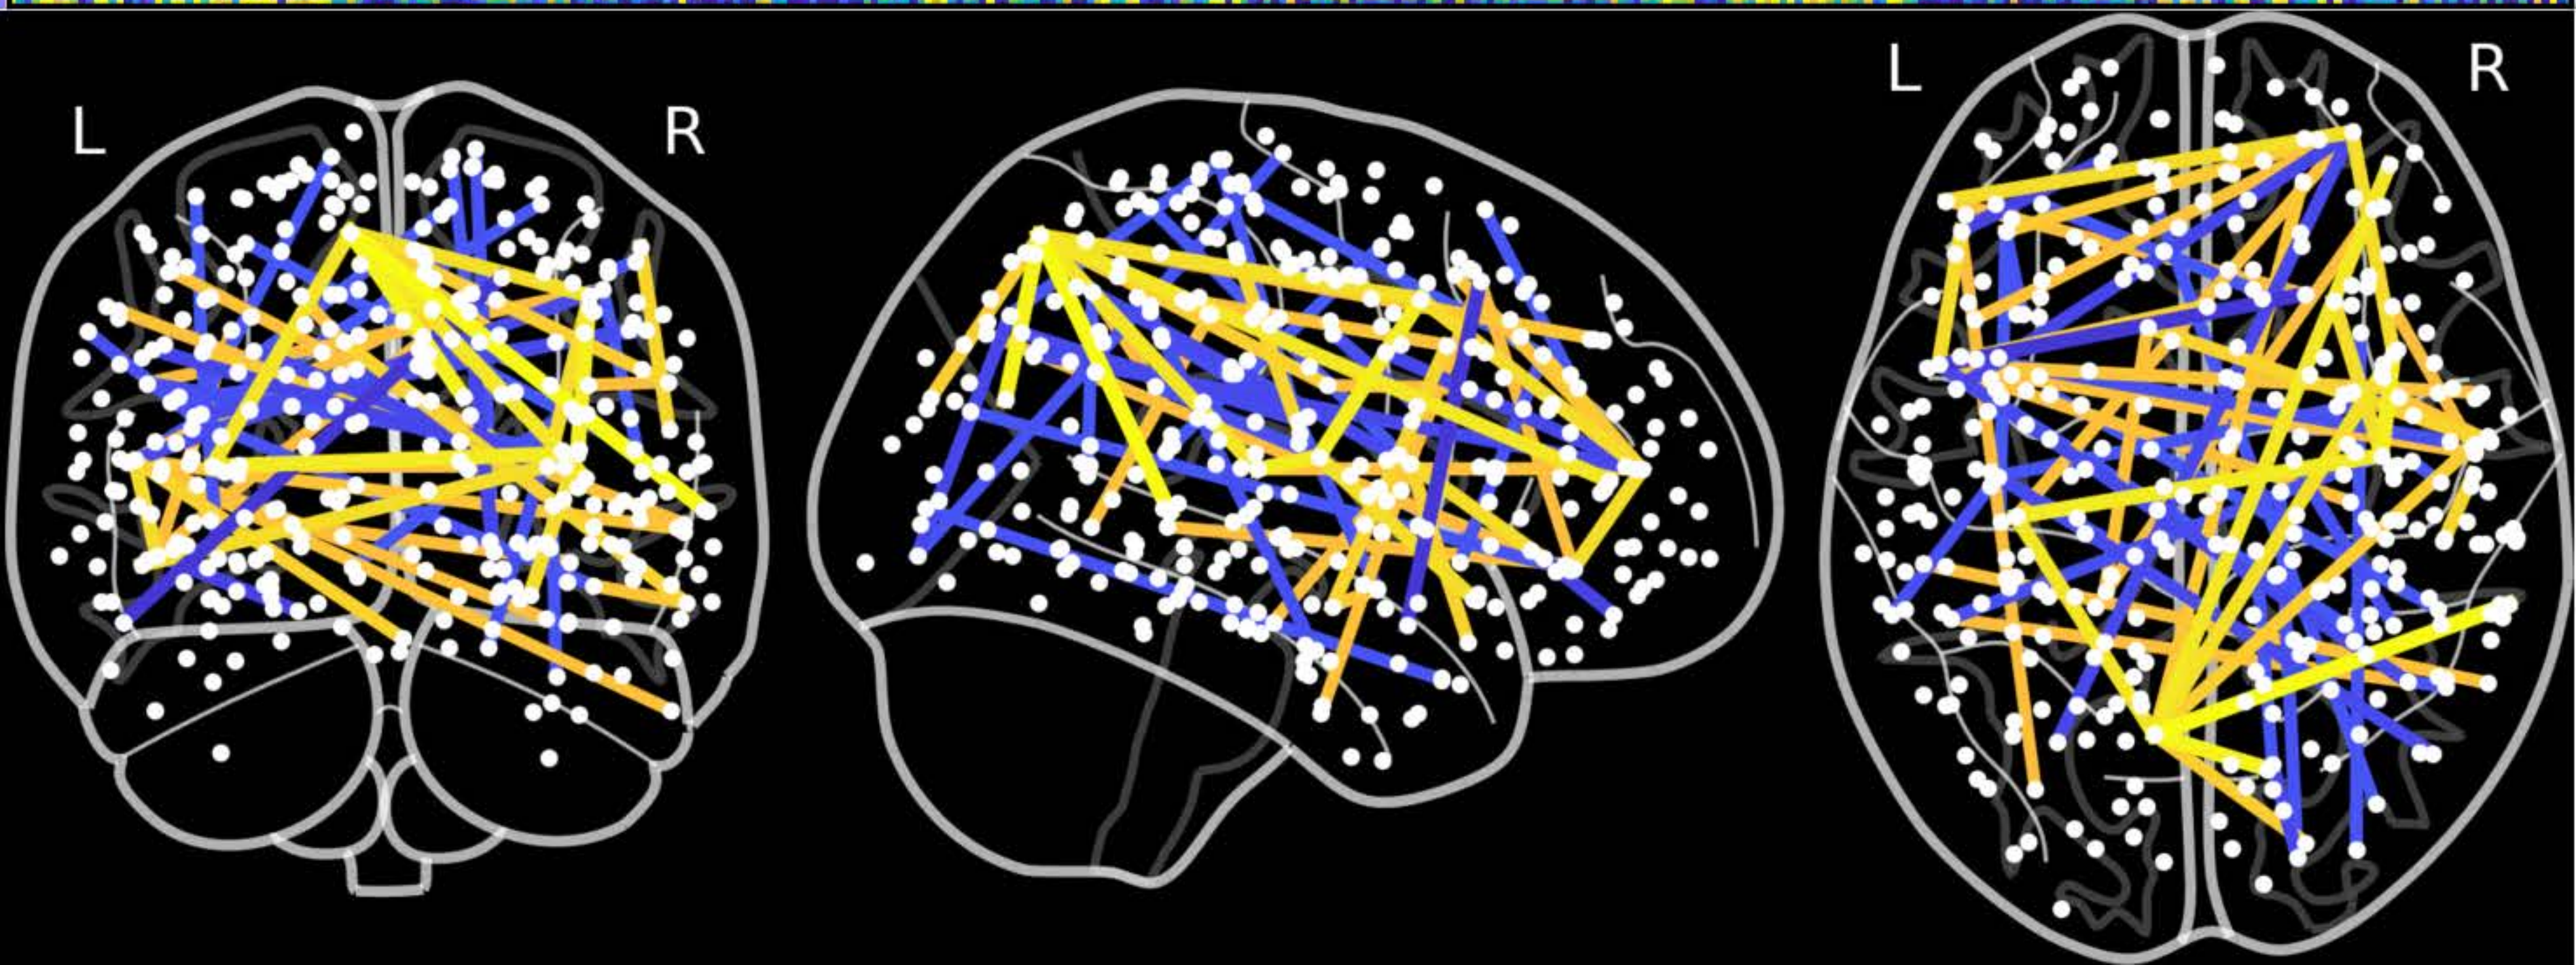



component\_22

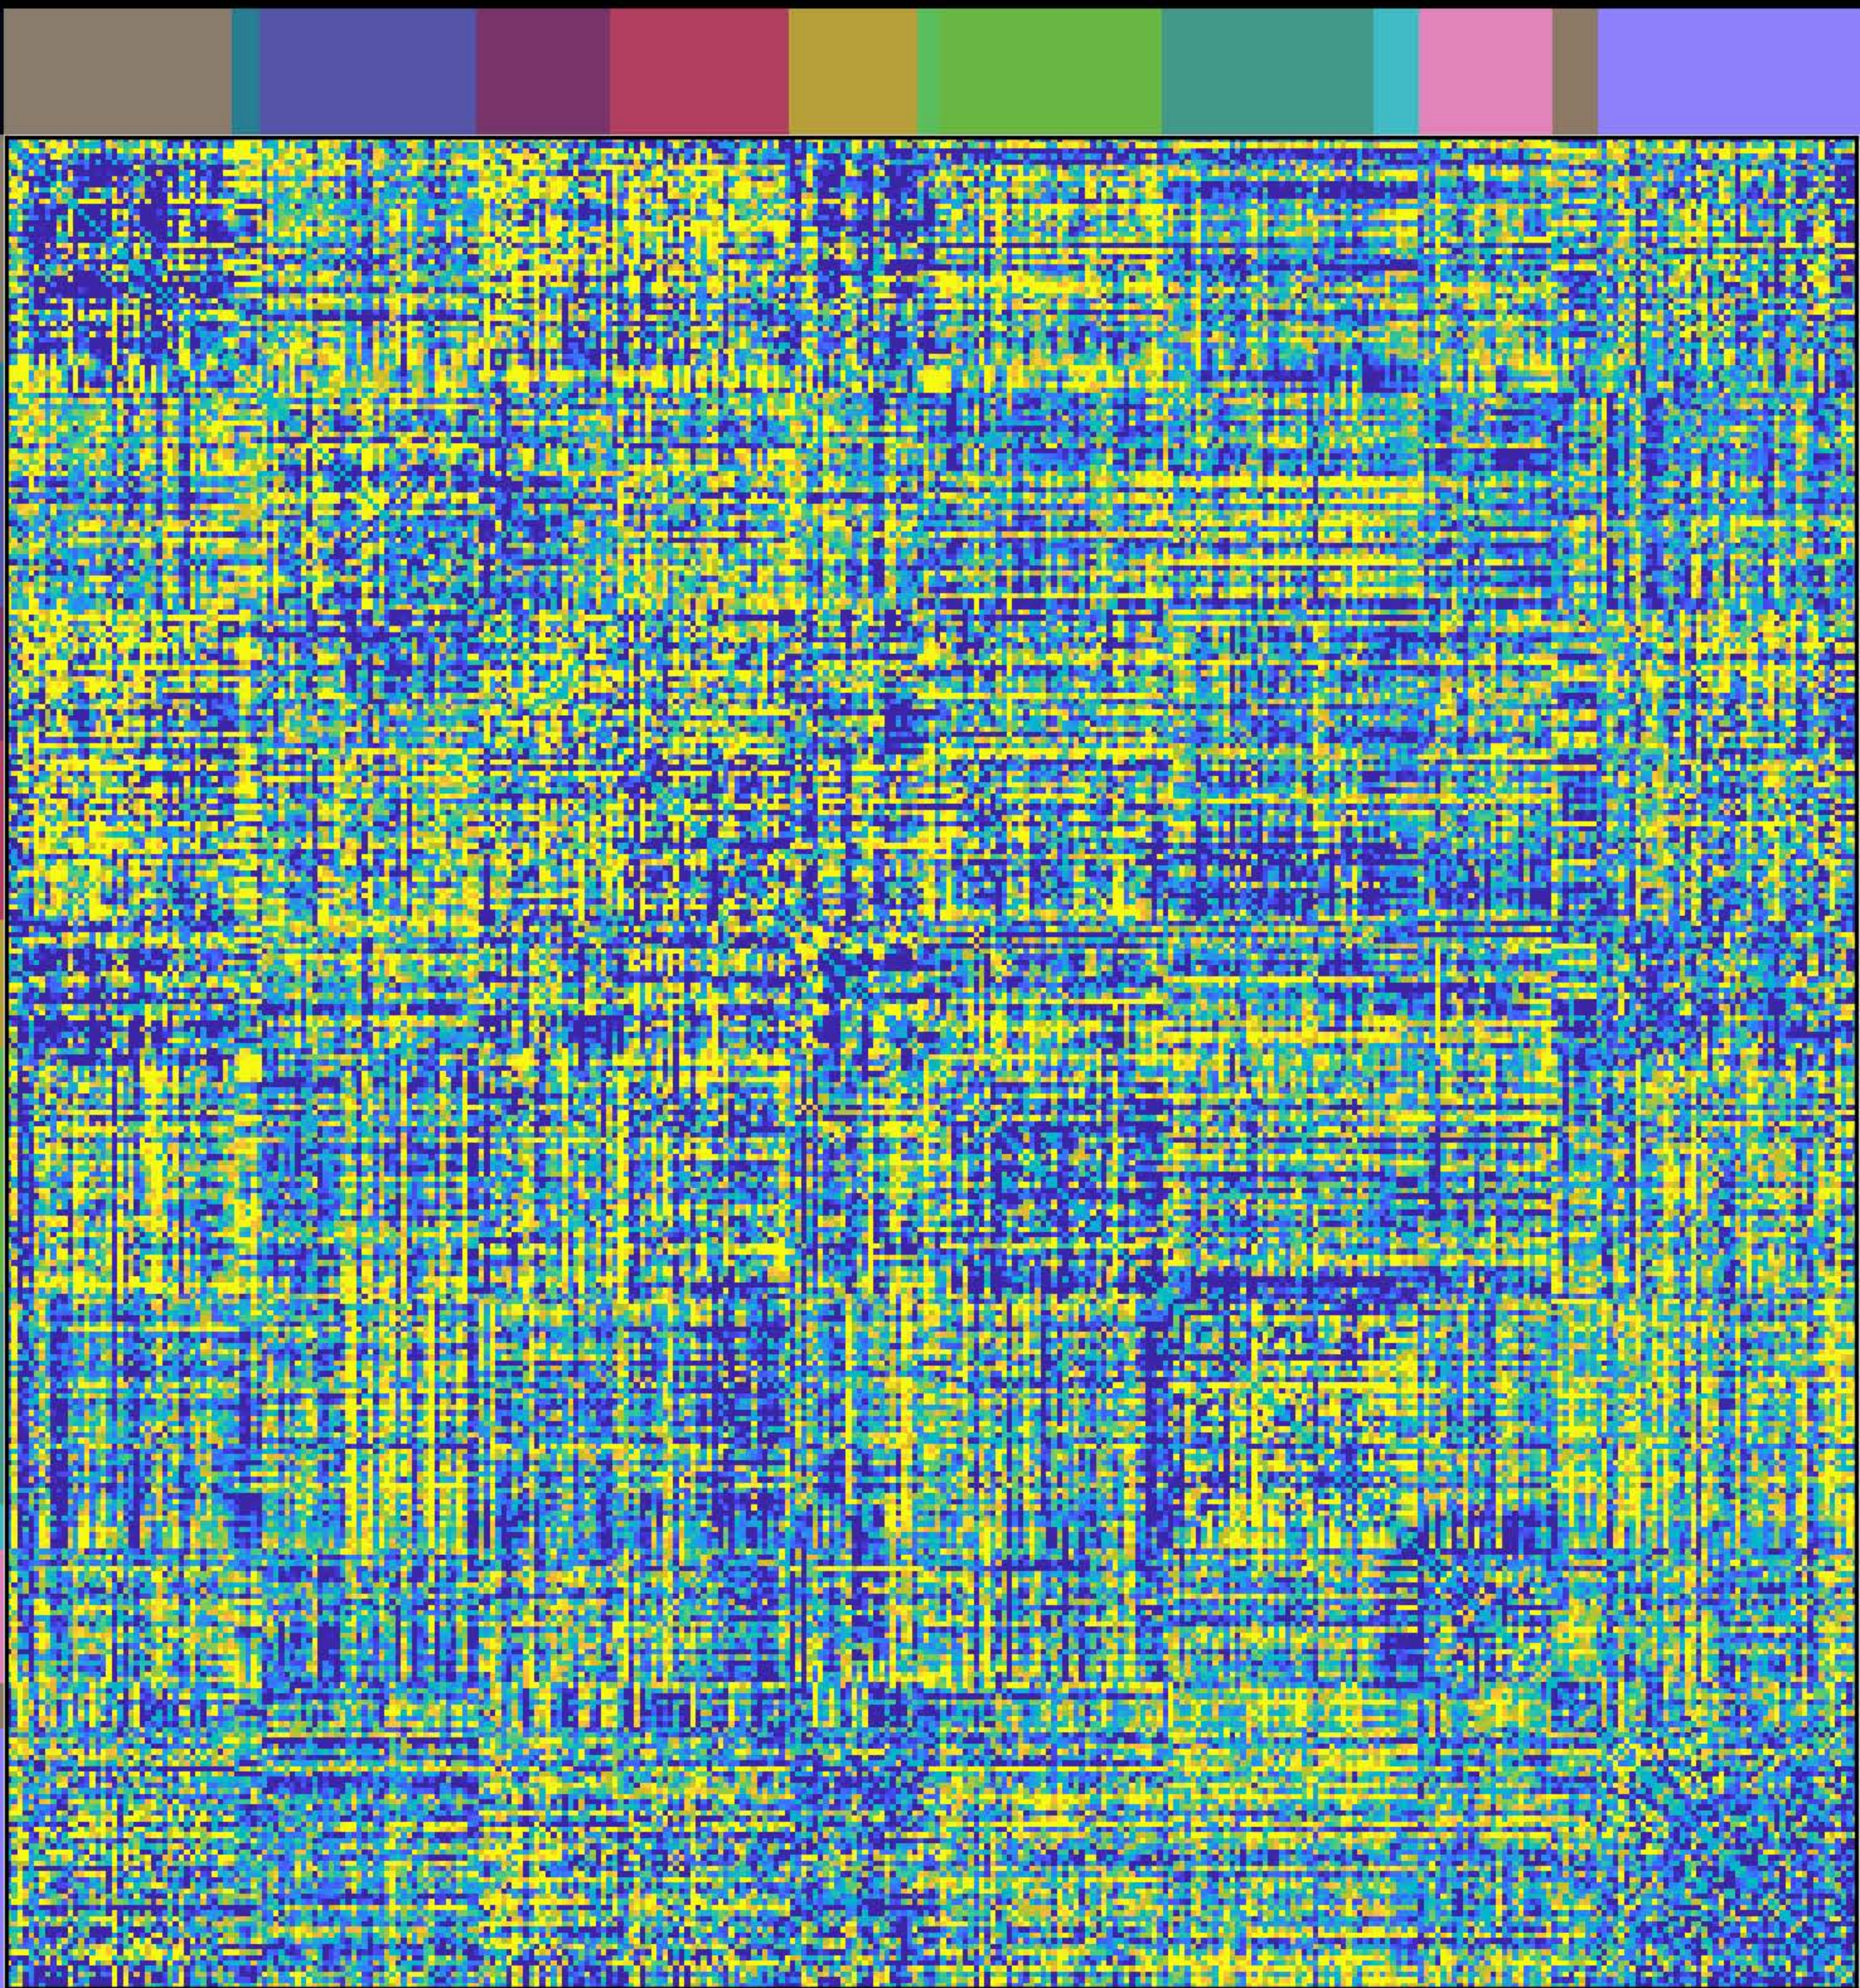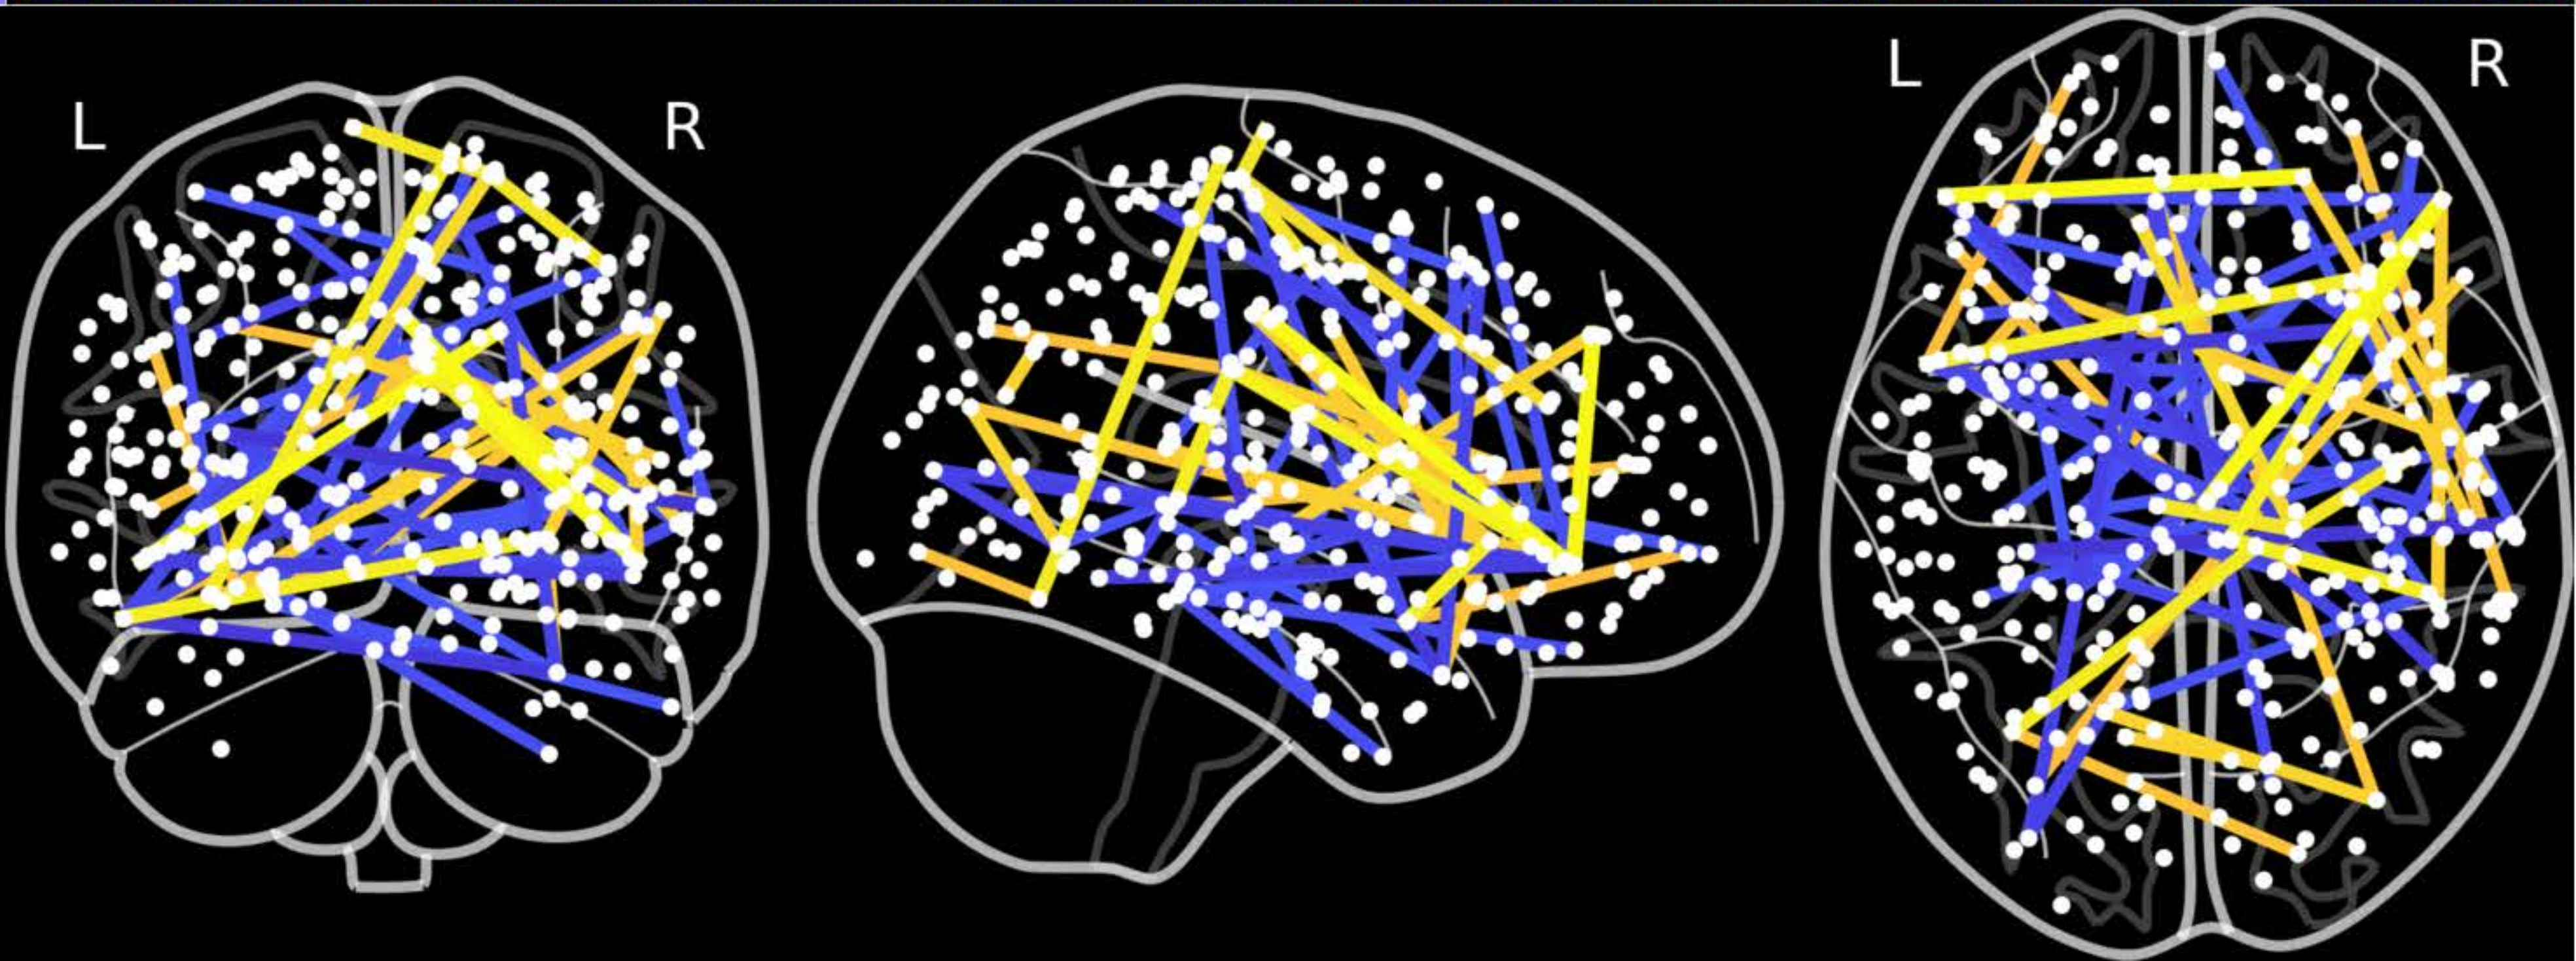



component\_23

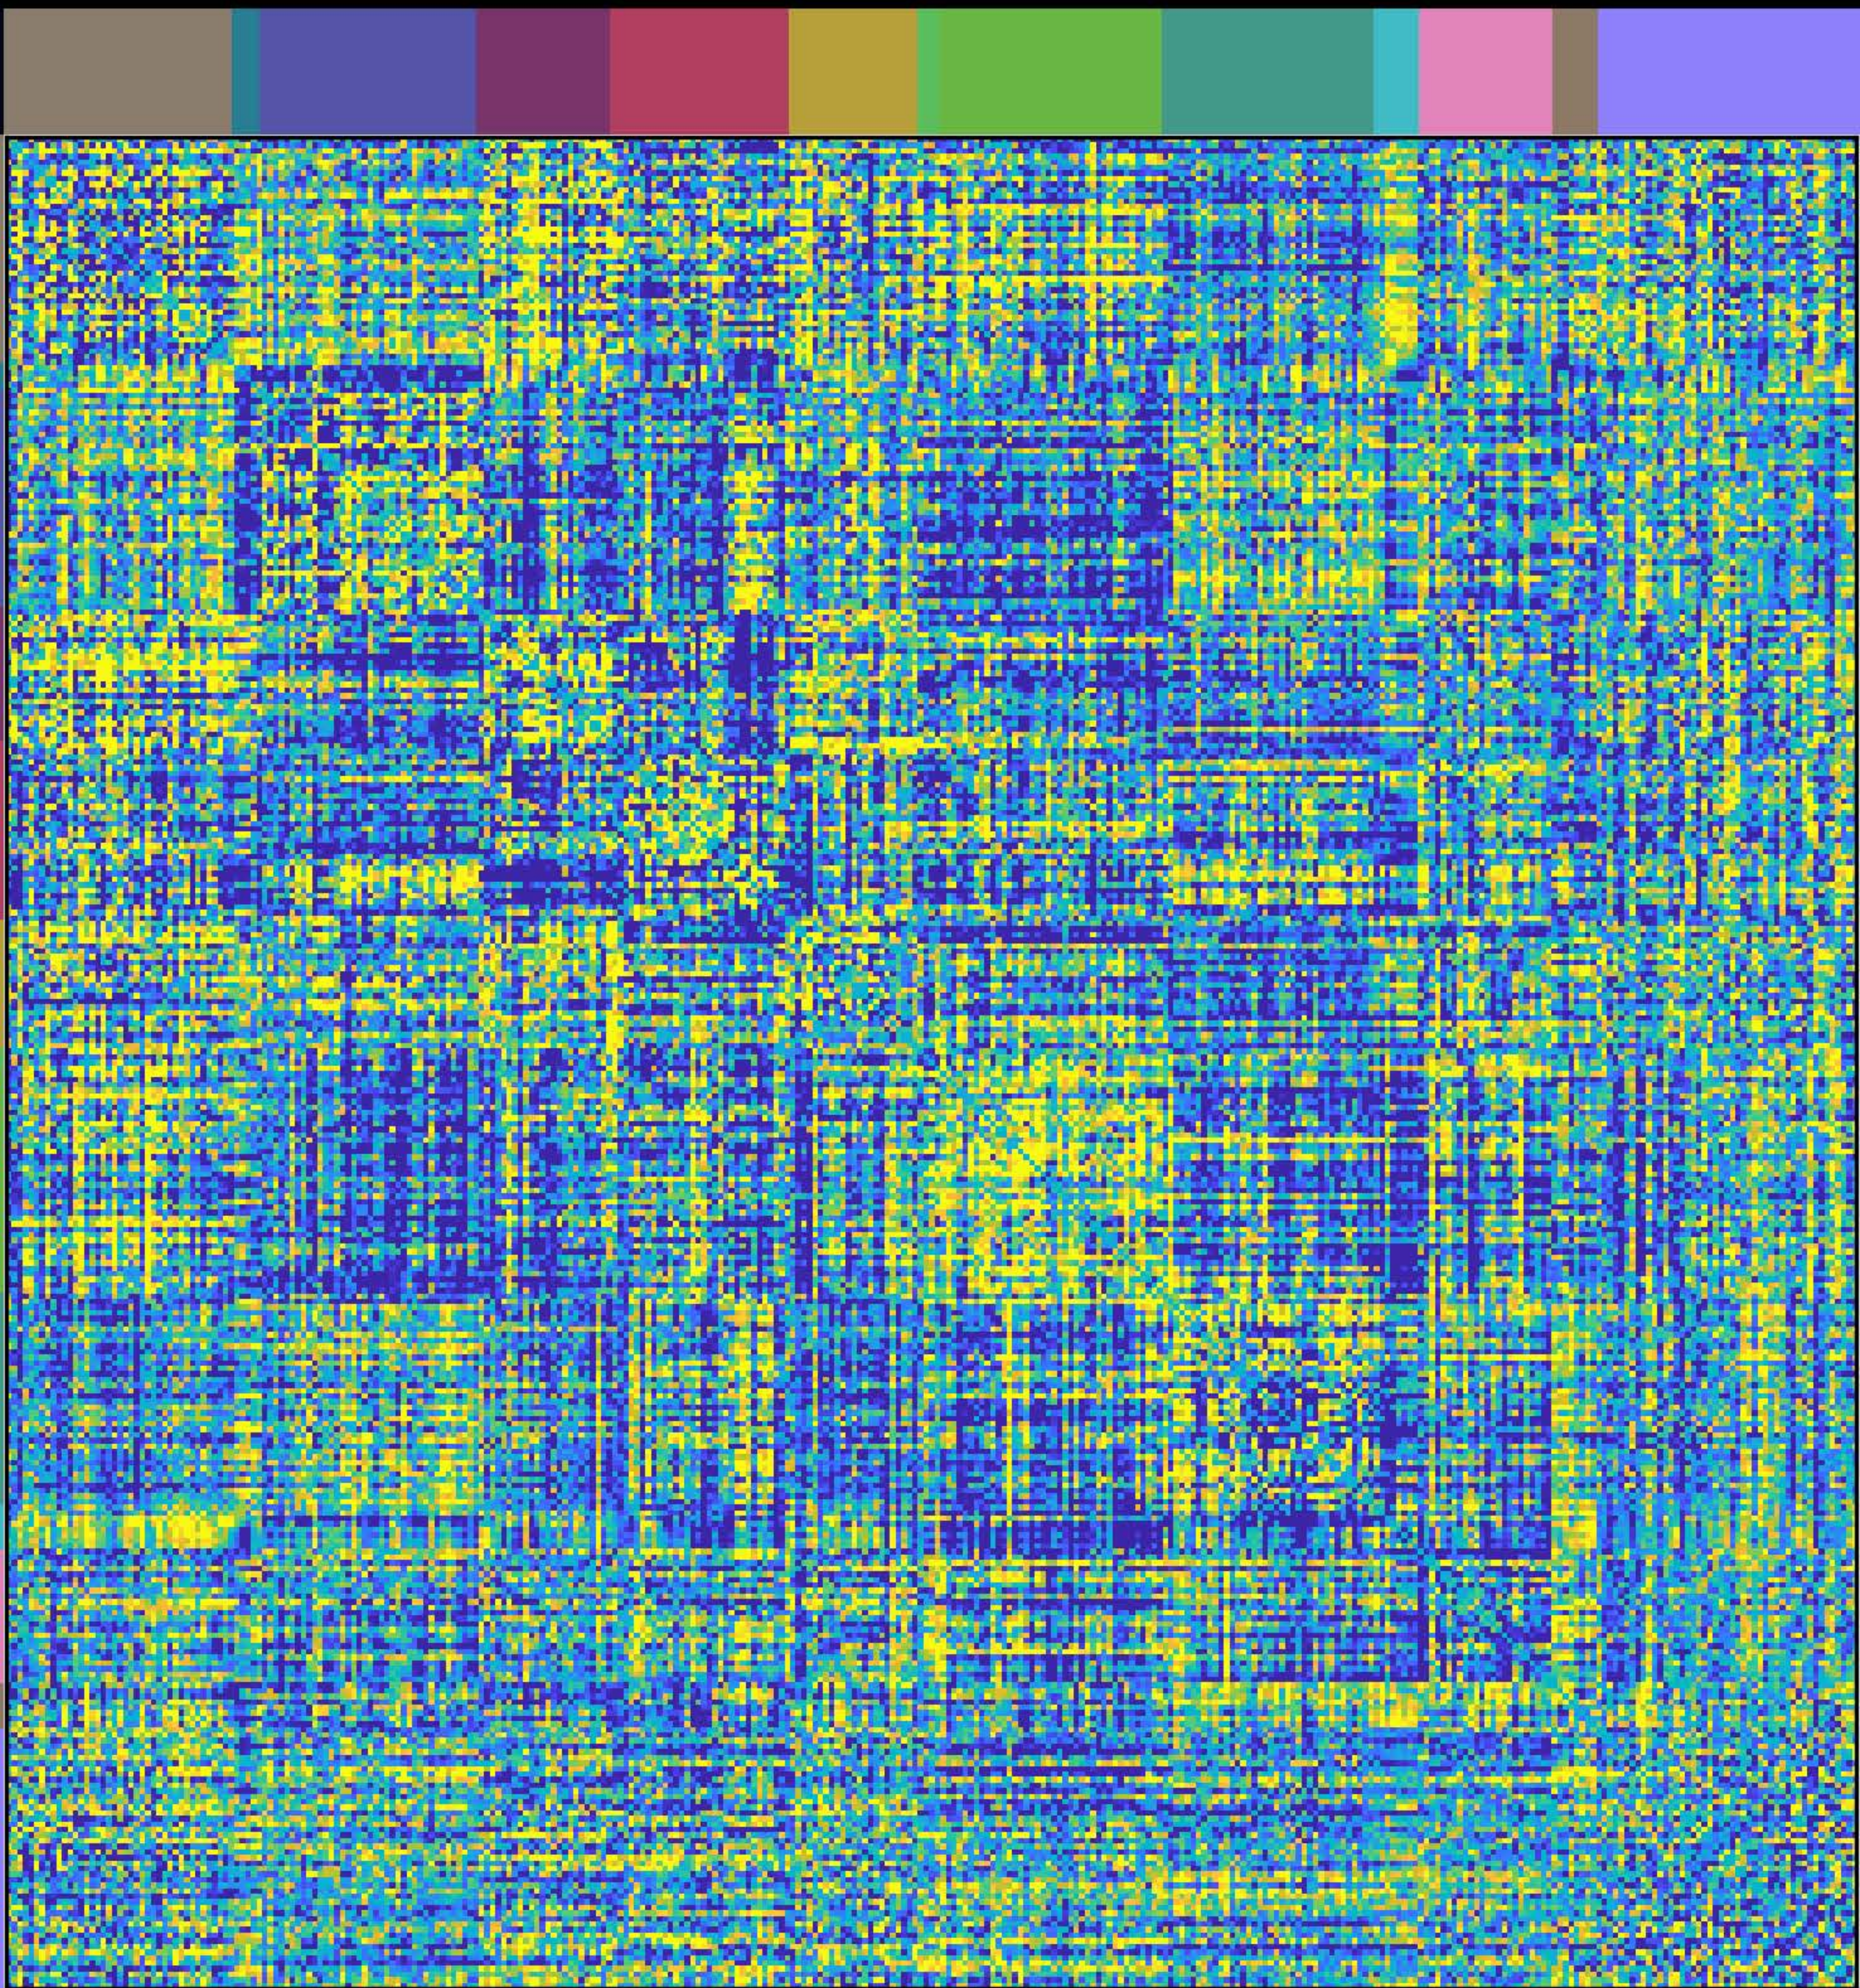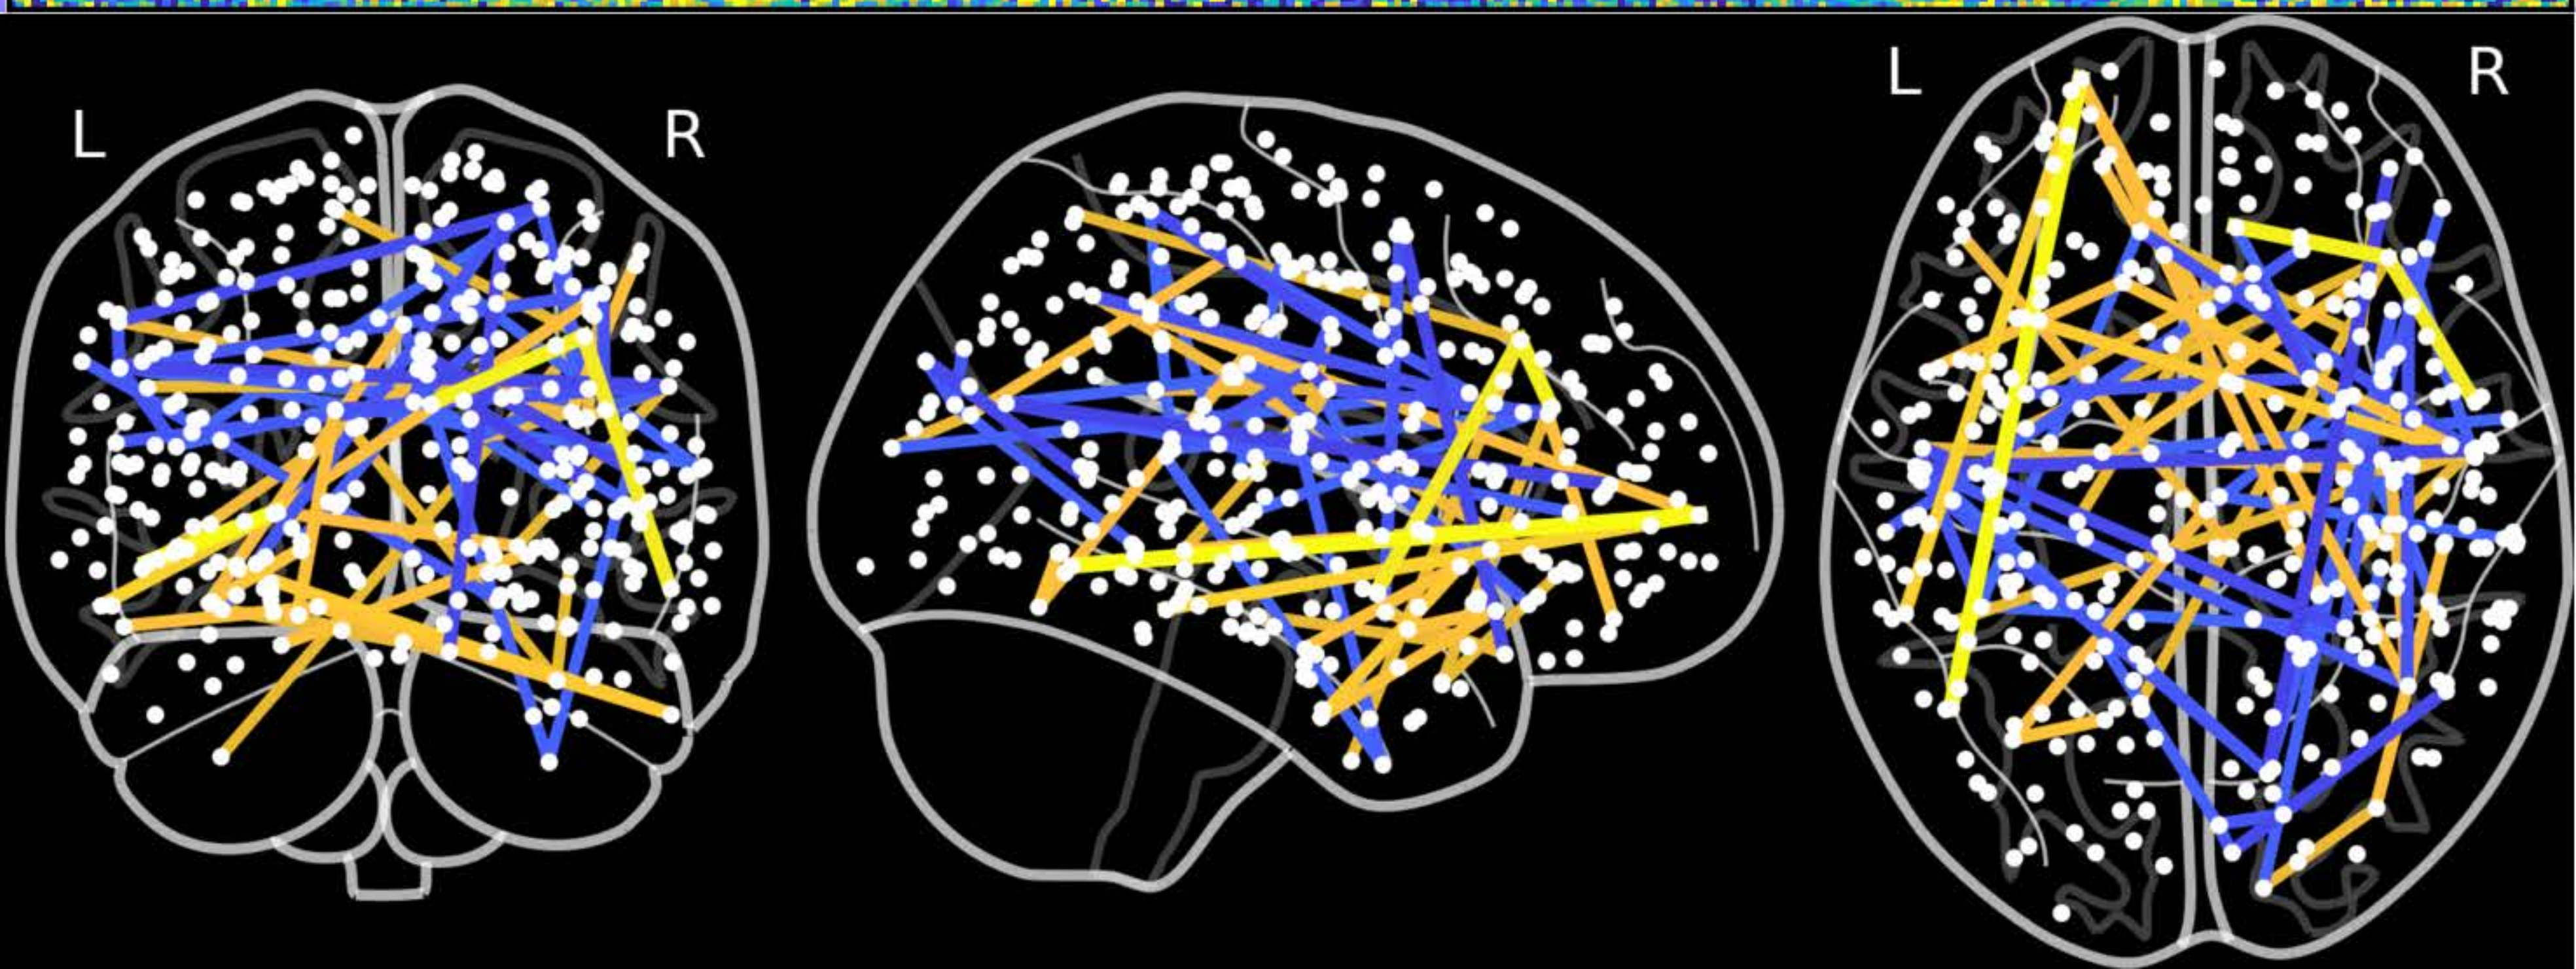



Anxious  
misery  
subjects'  
heatmaps



# NDARBB471NAU\_madrs\_left\_dlpfc

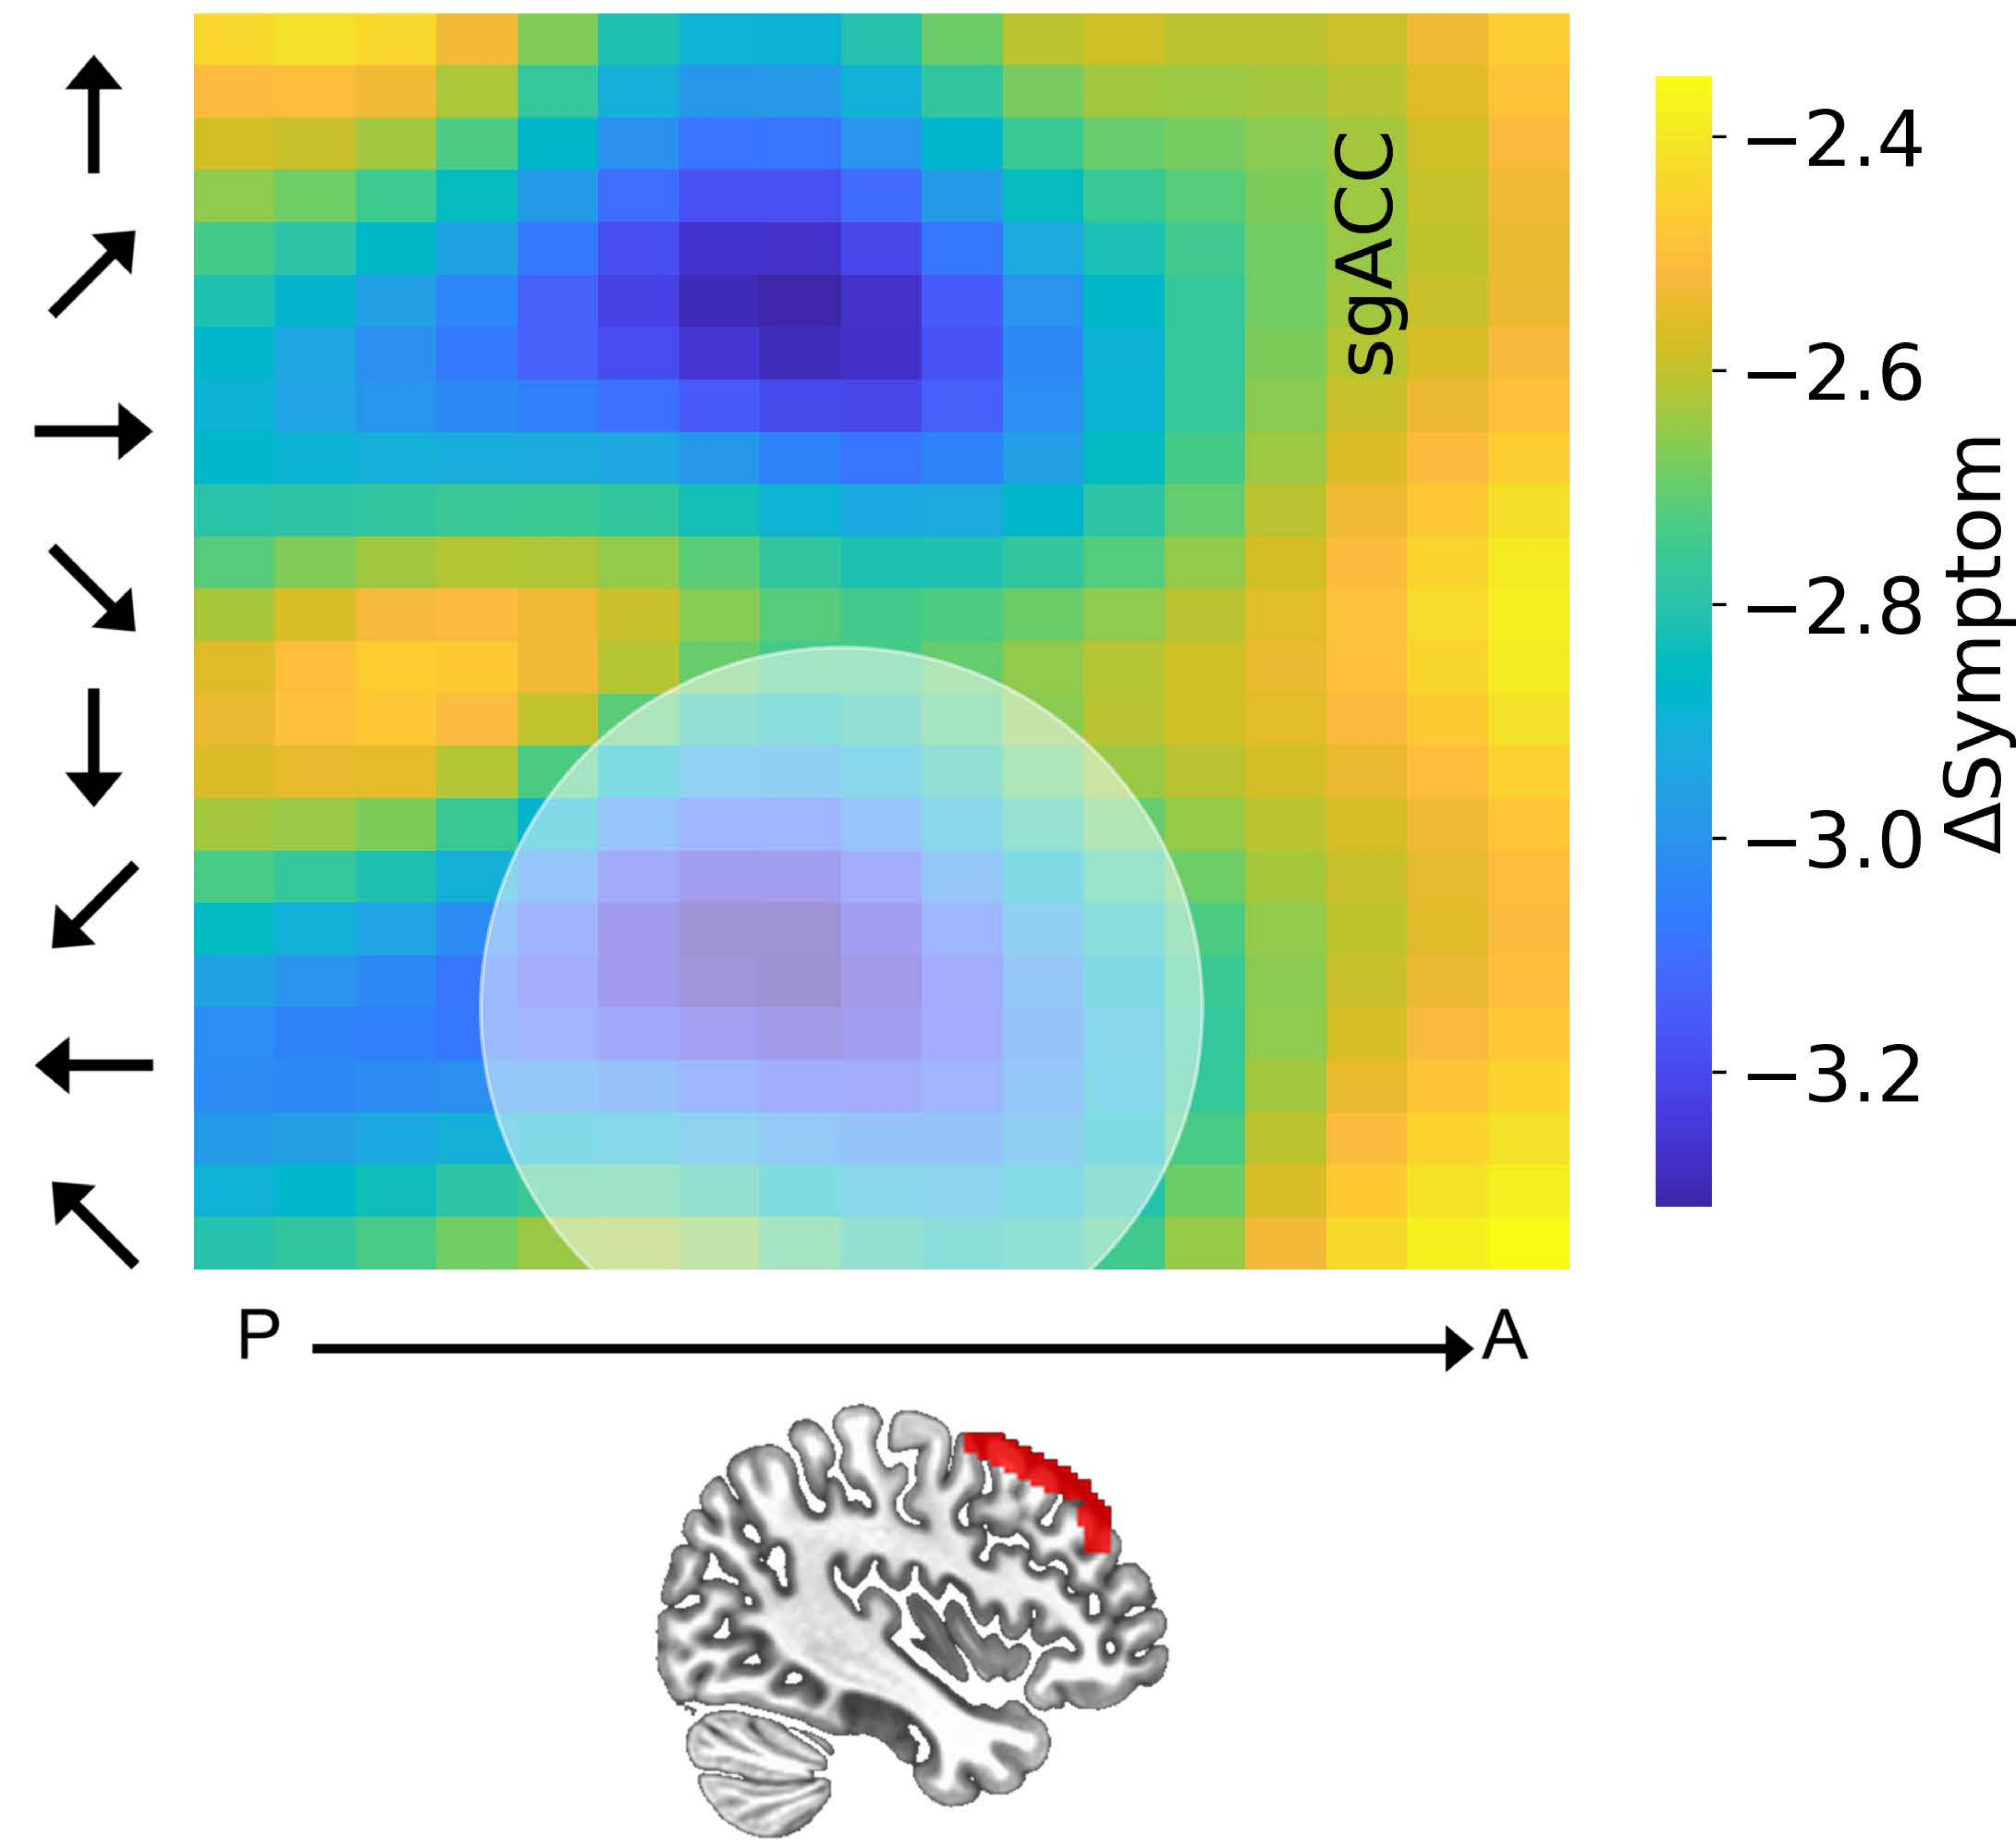



# NDARBG497RE1\_madrs\_left\_dlpfc

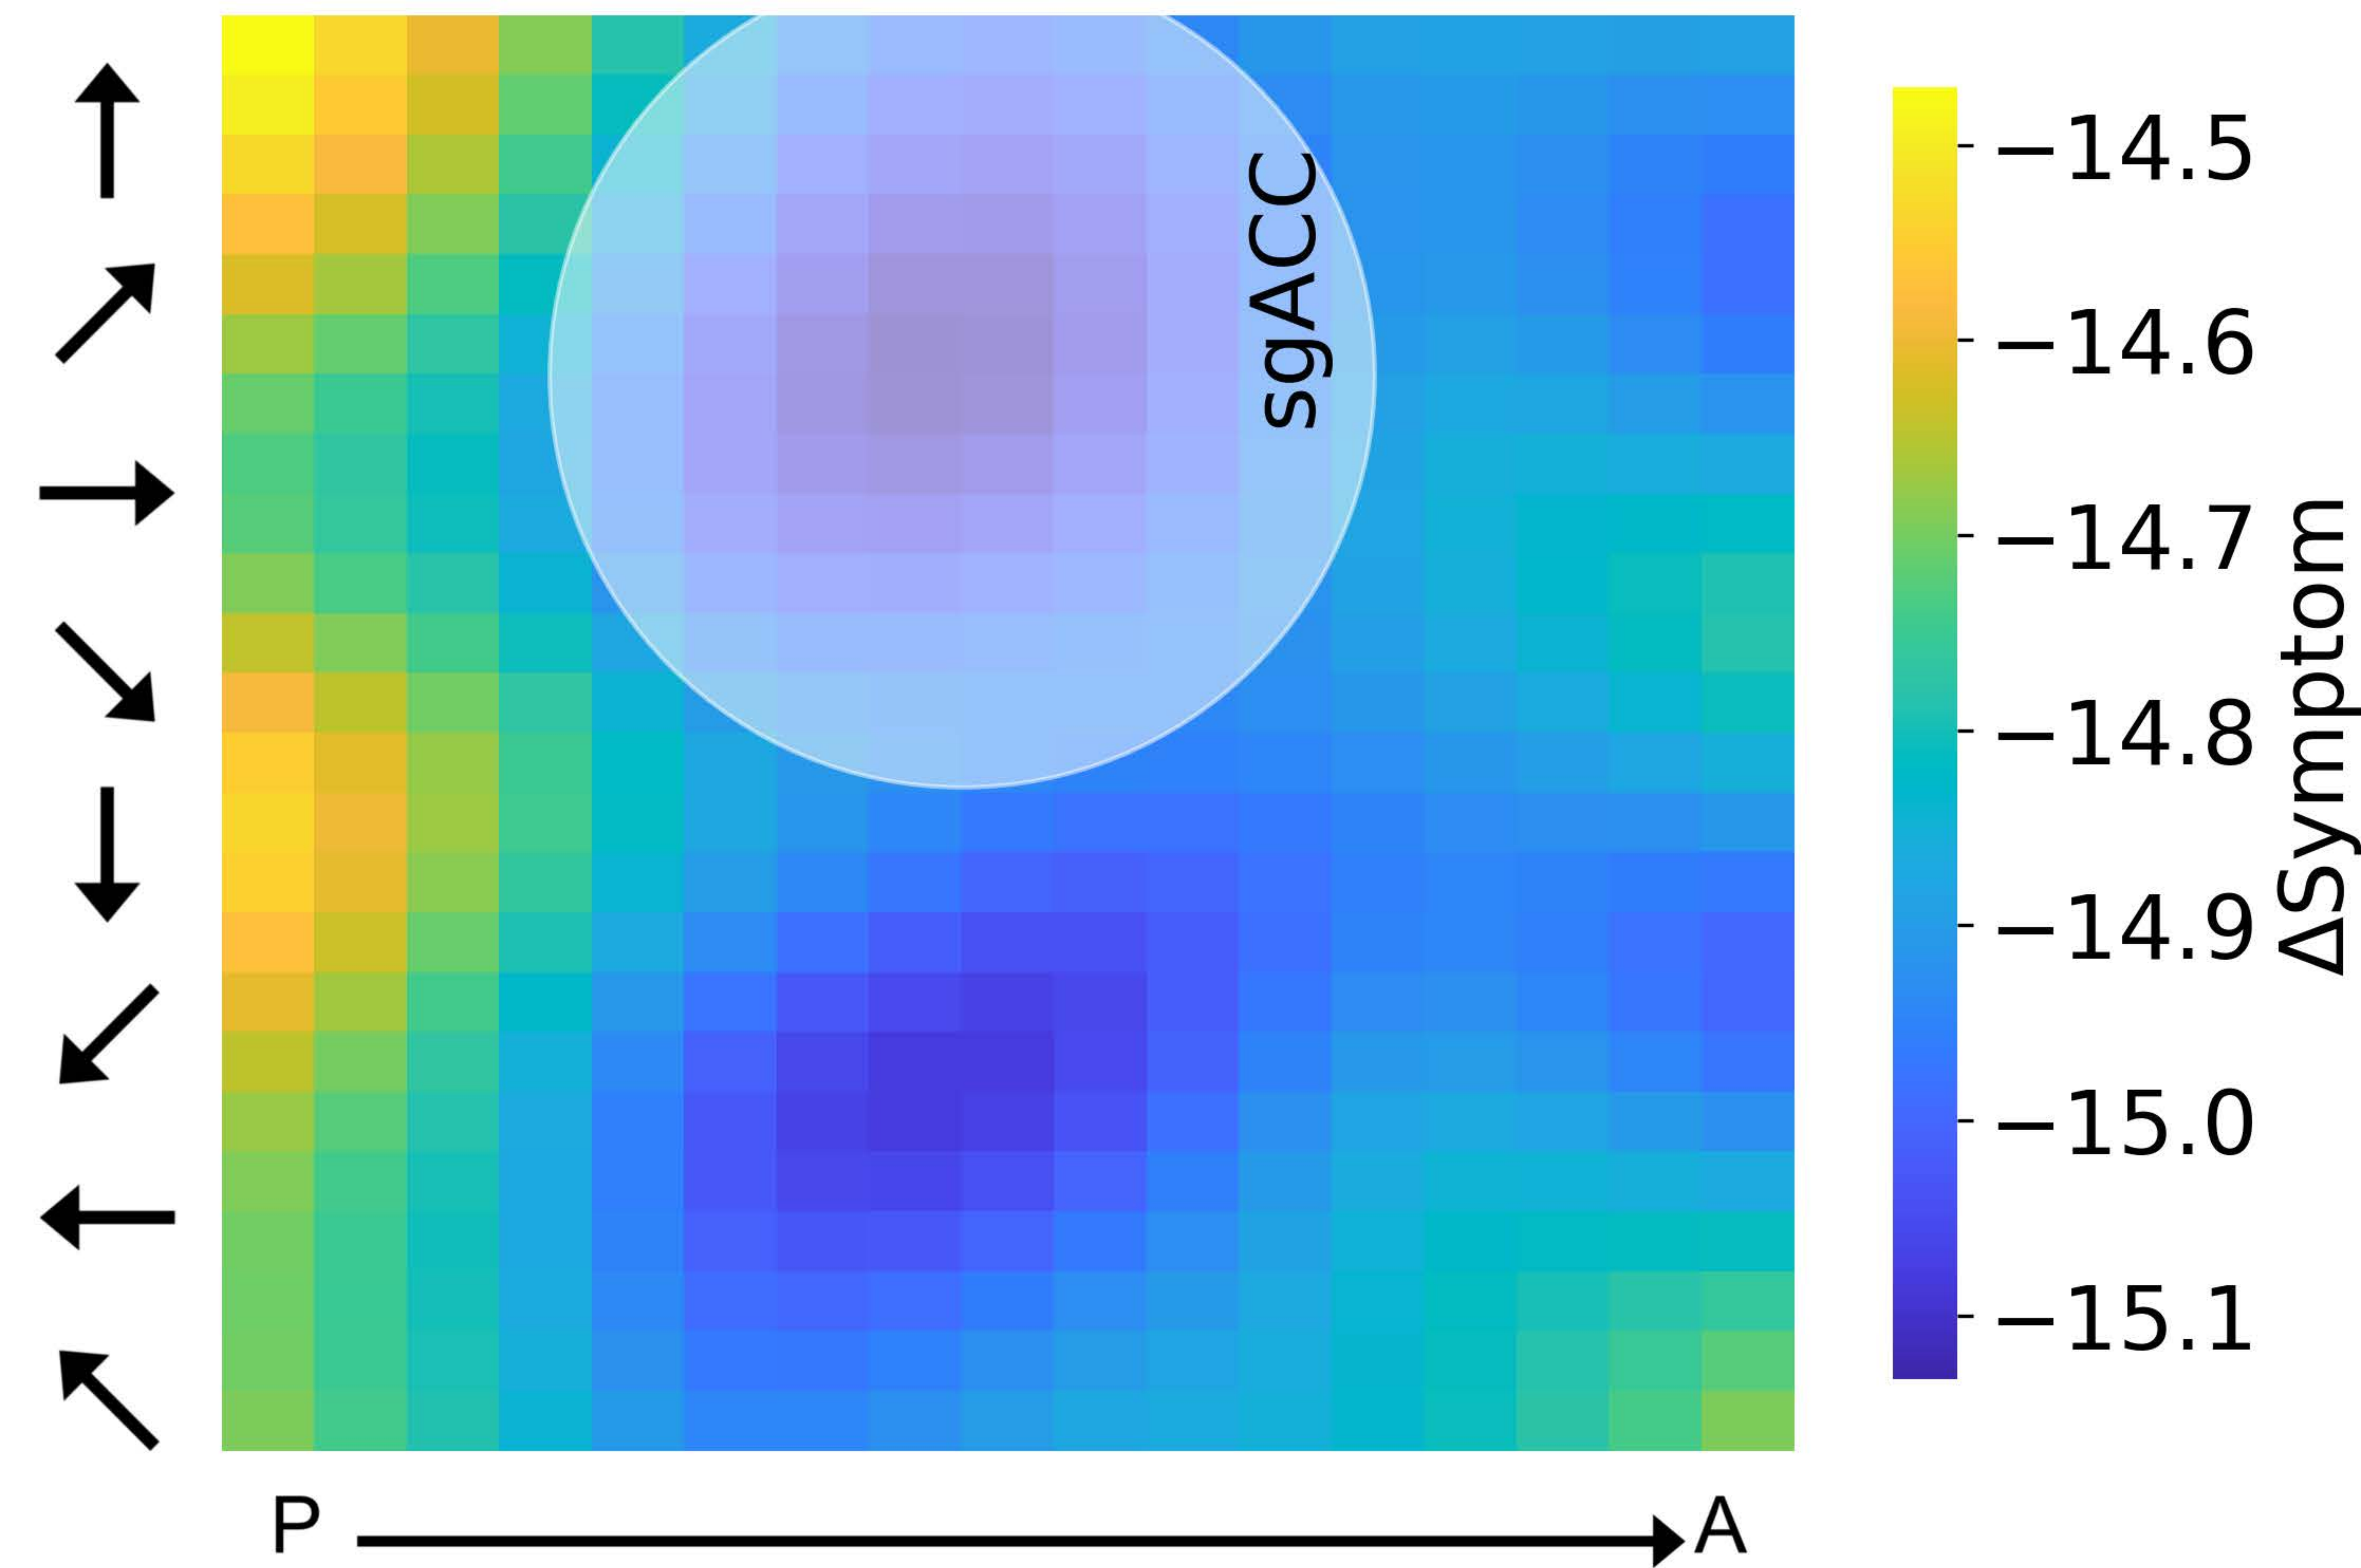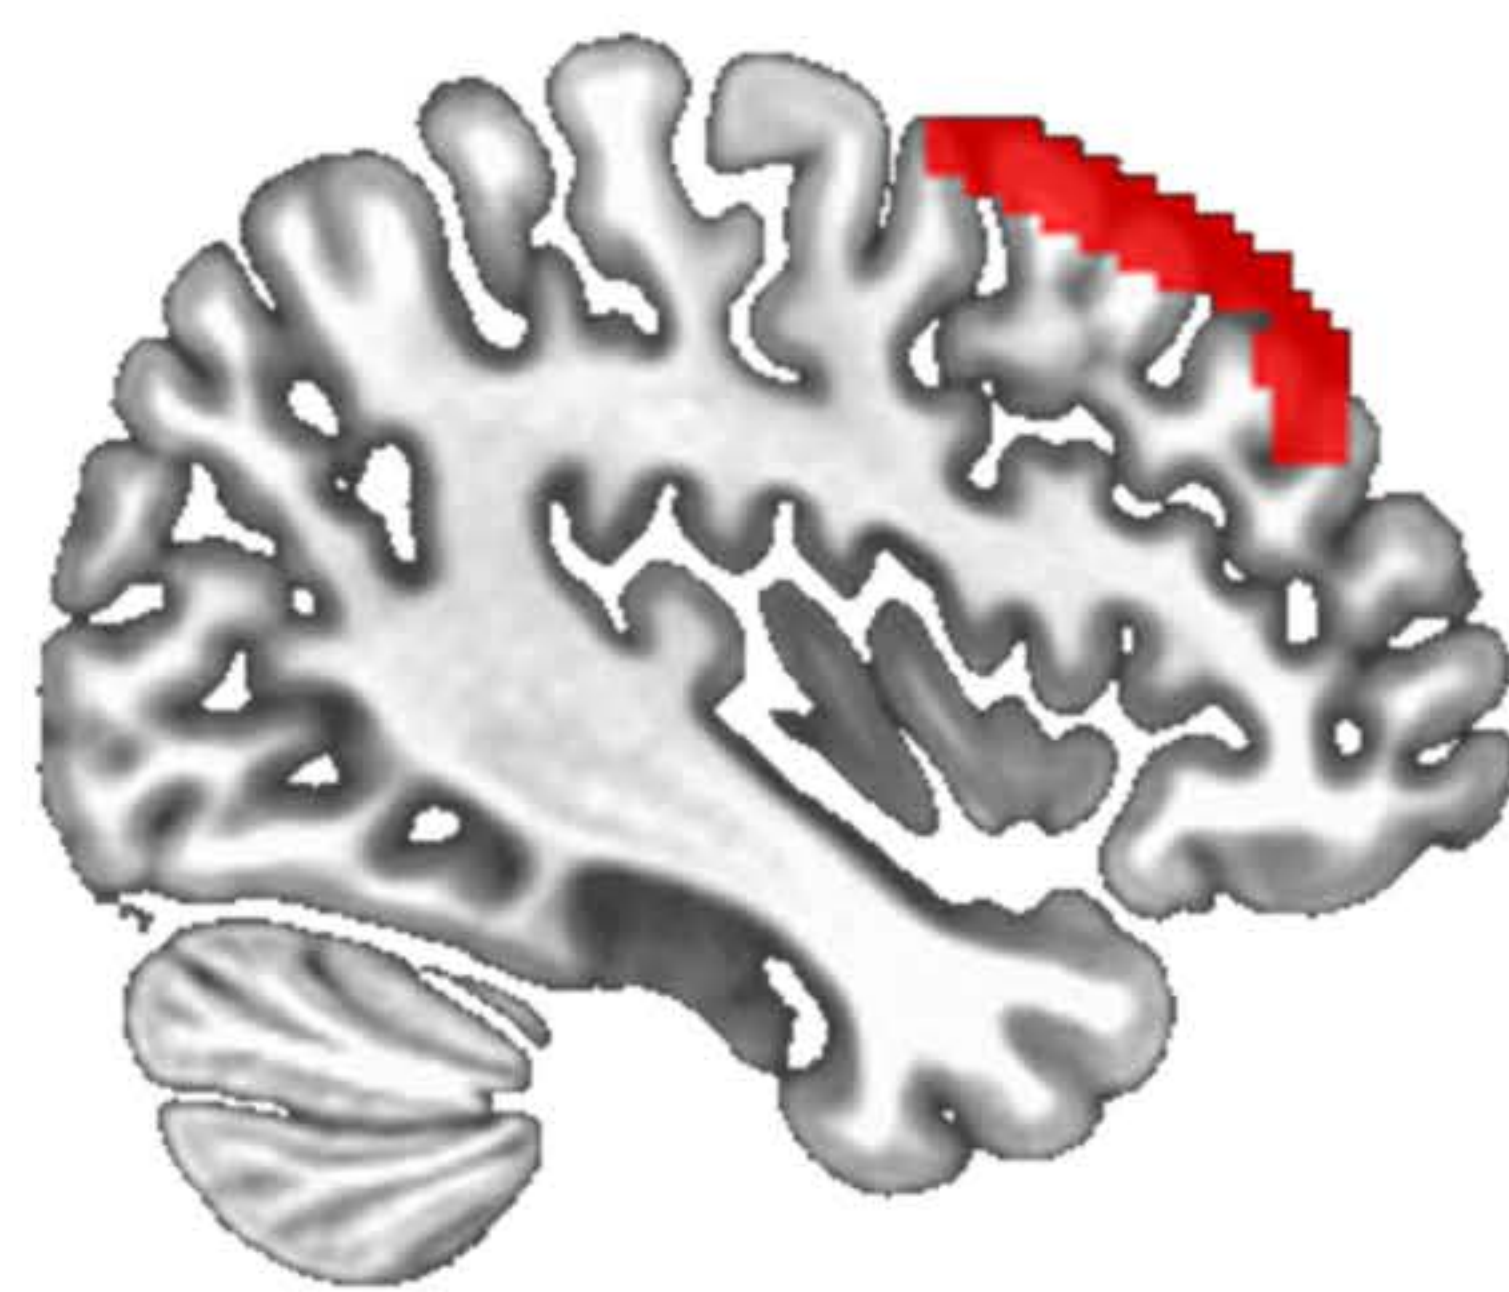



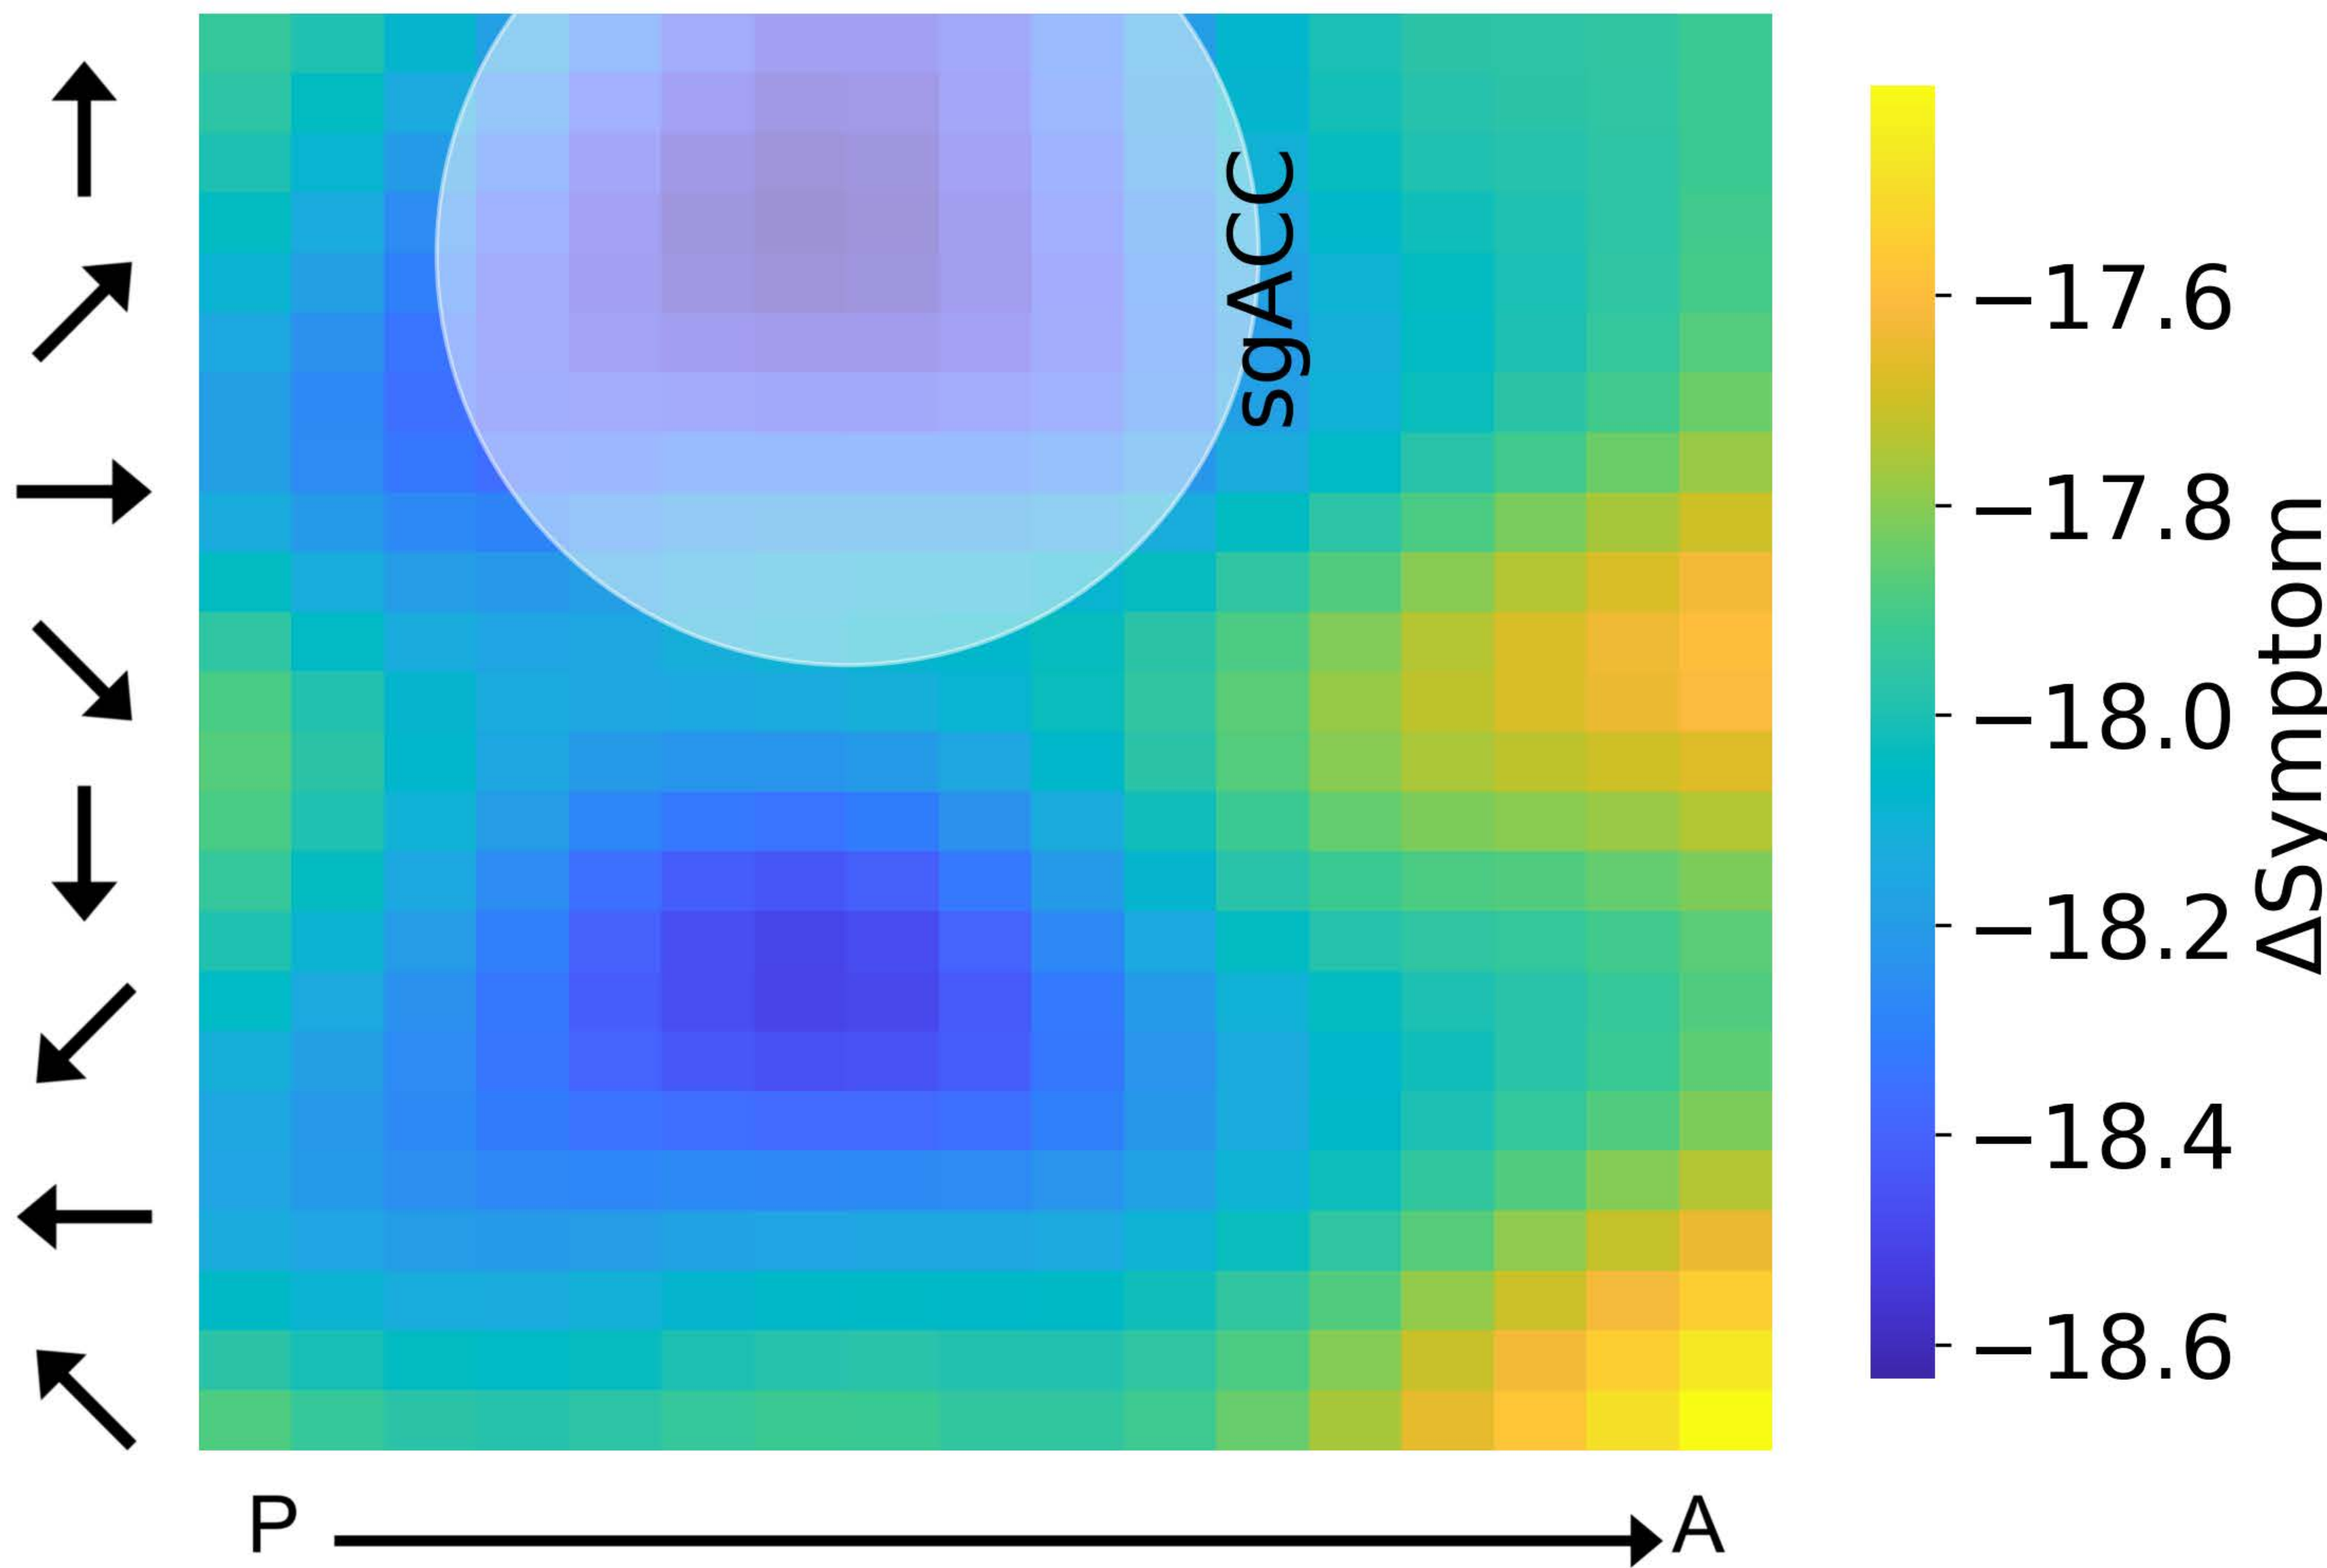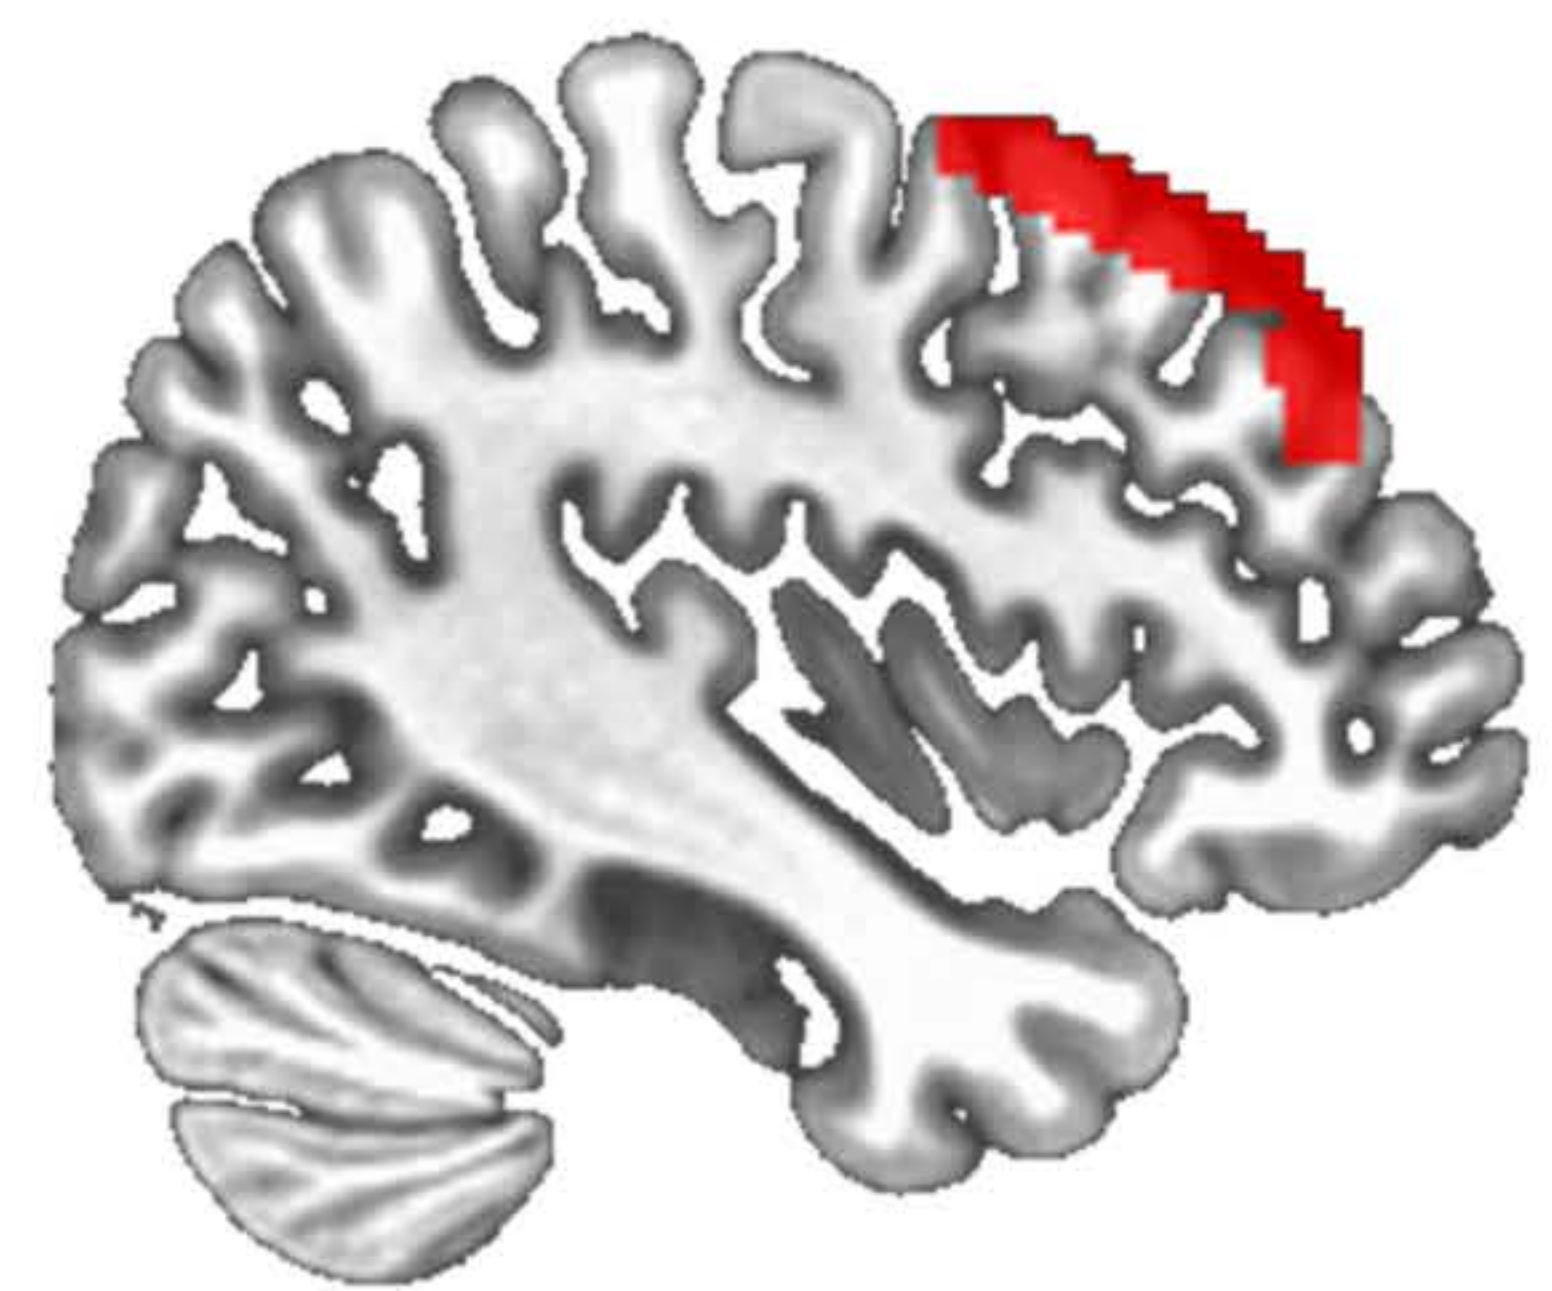



# NDARBL814BJK\_madrs\_left\_dlpfc

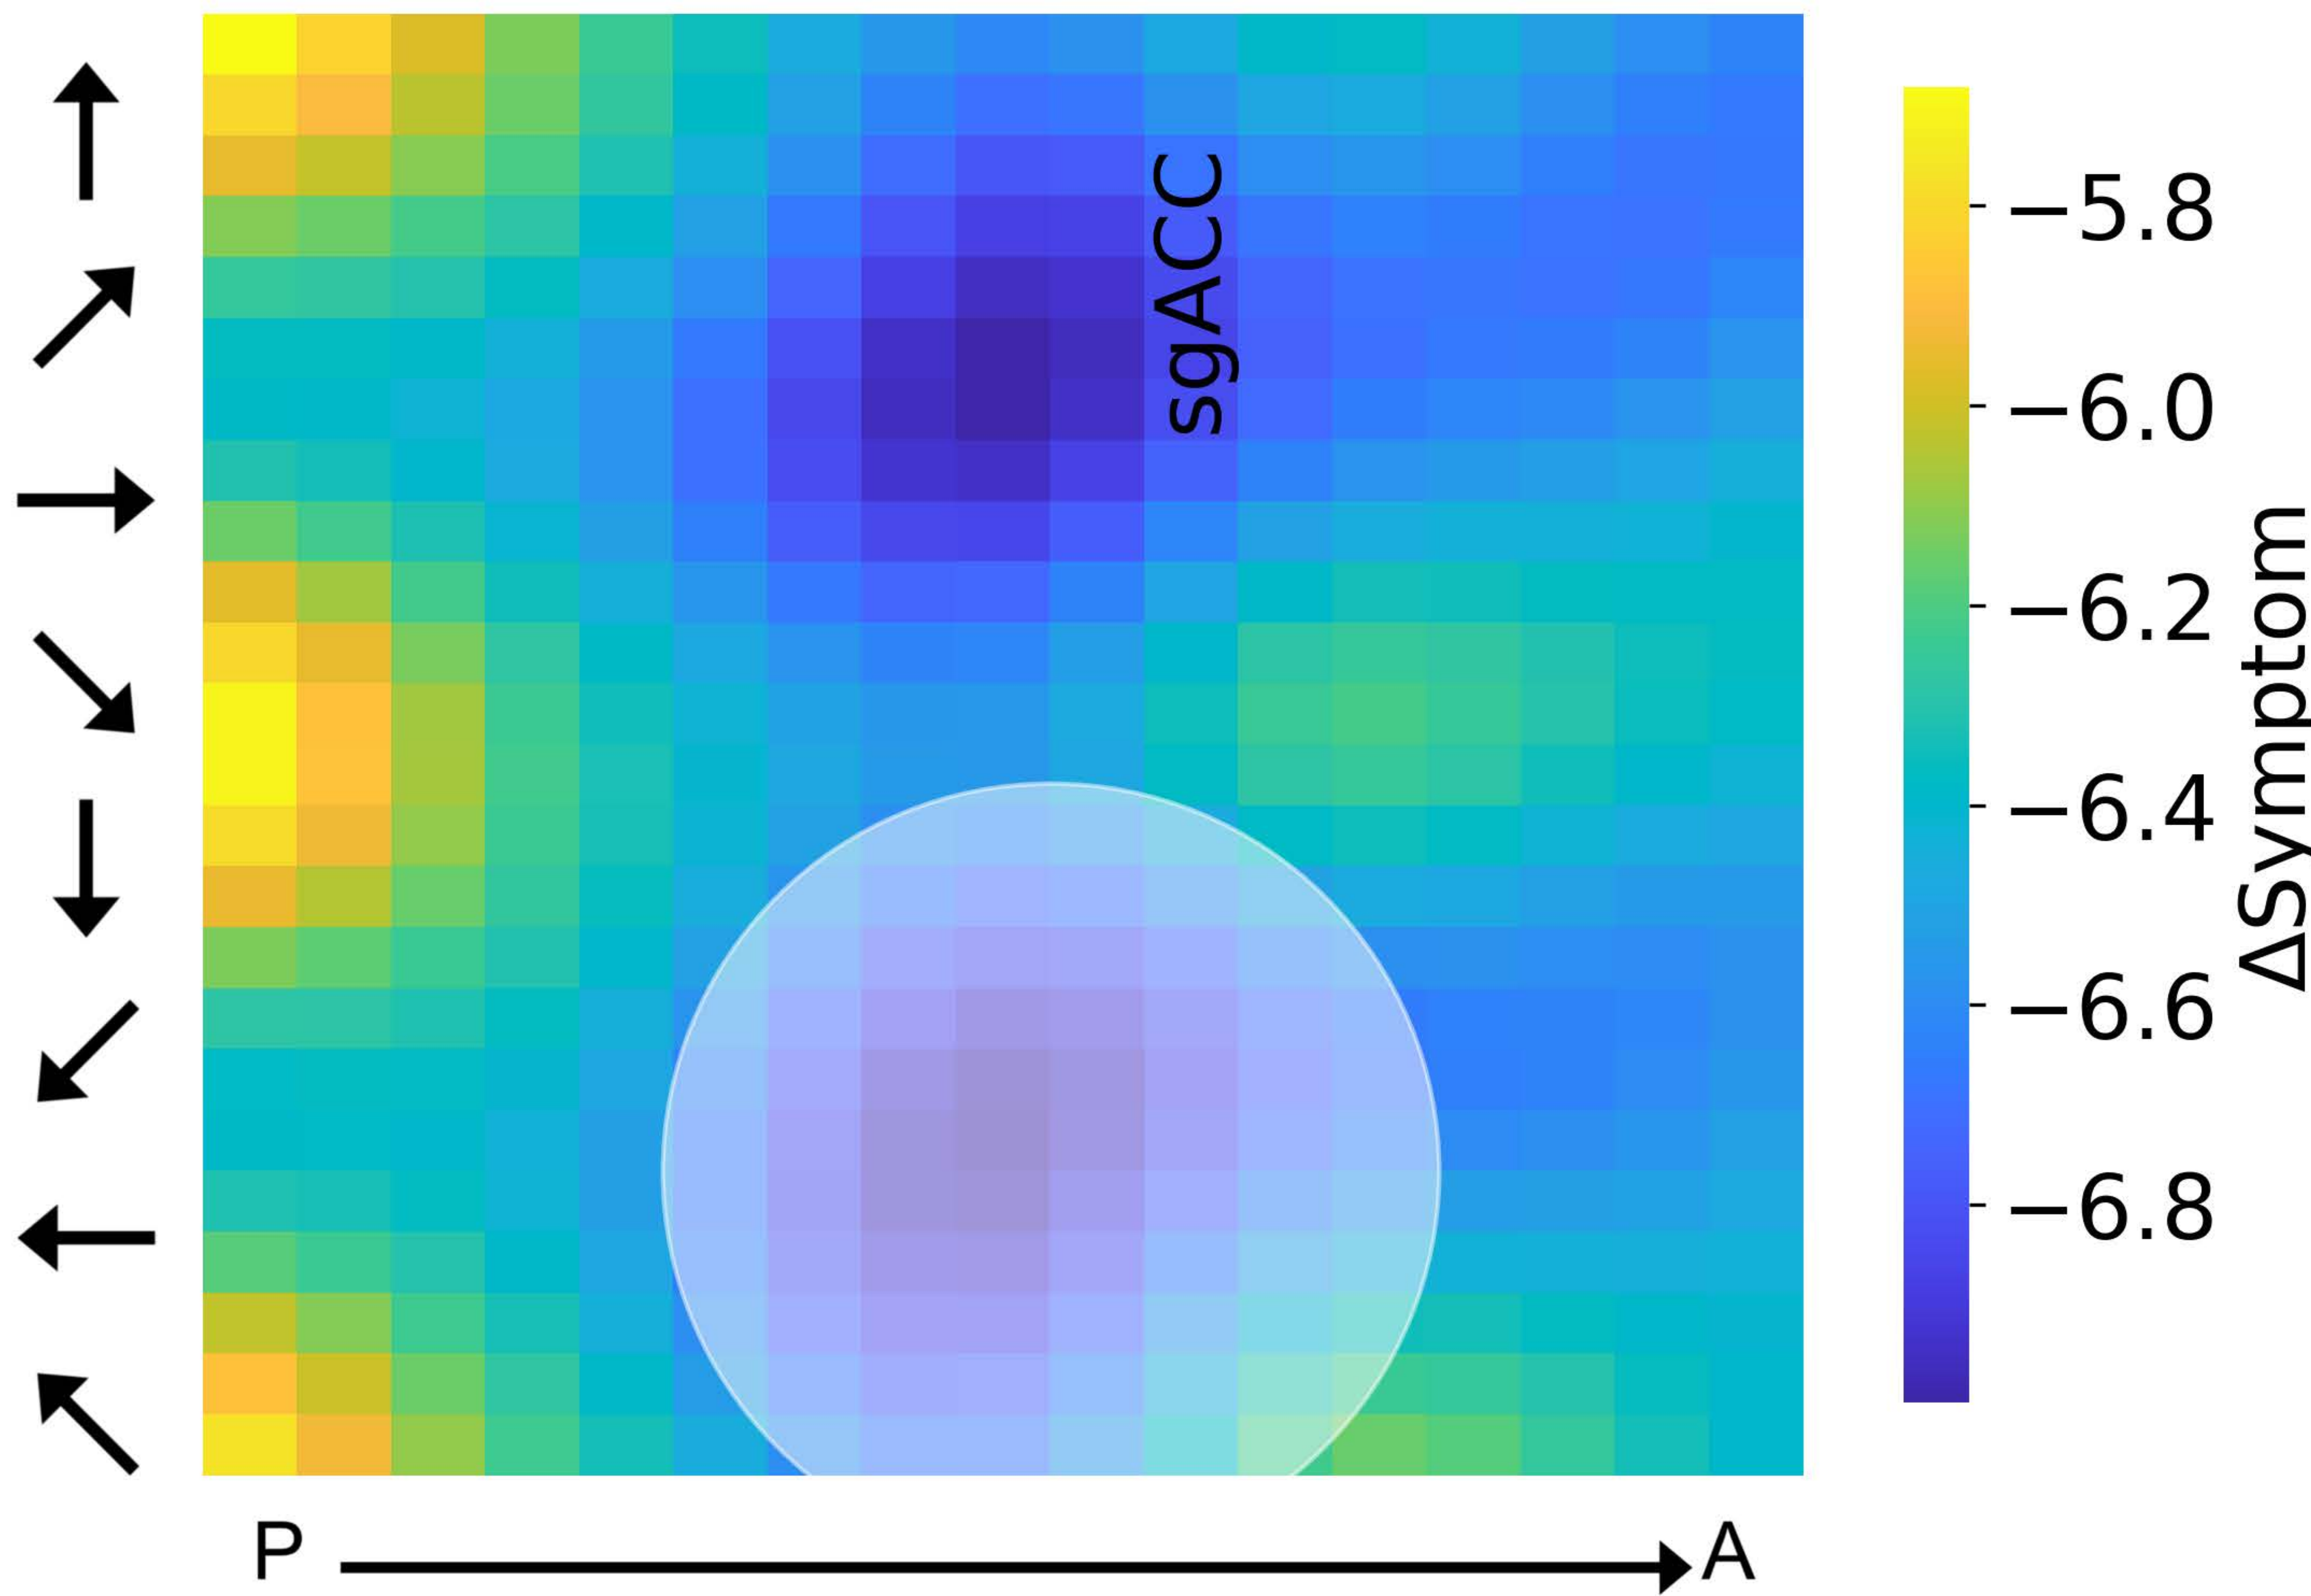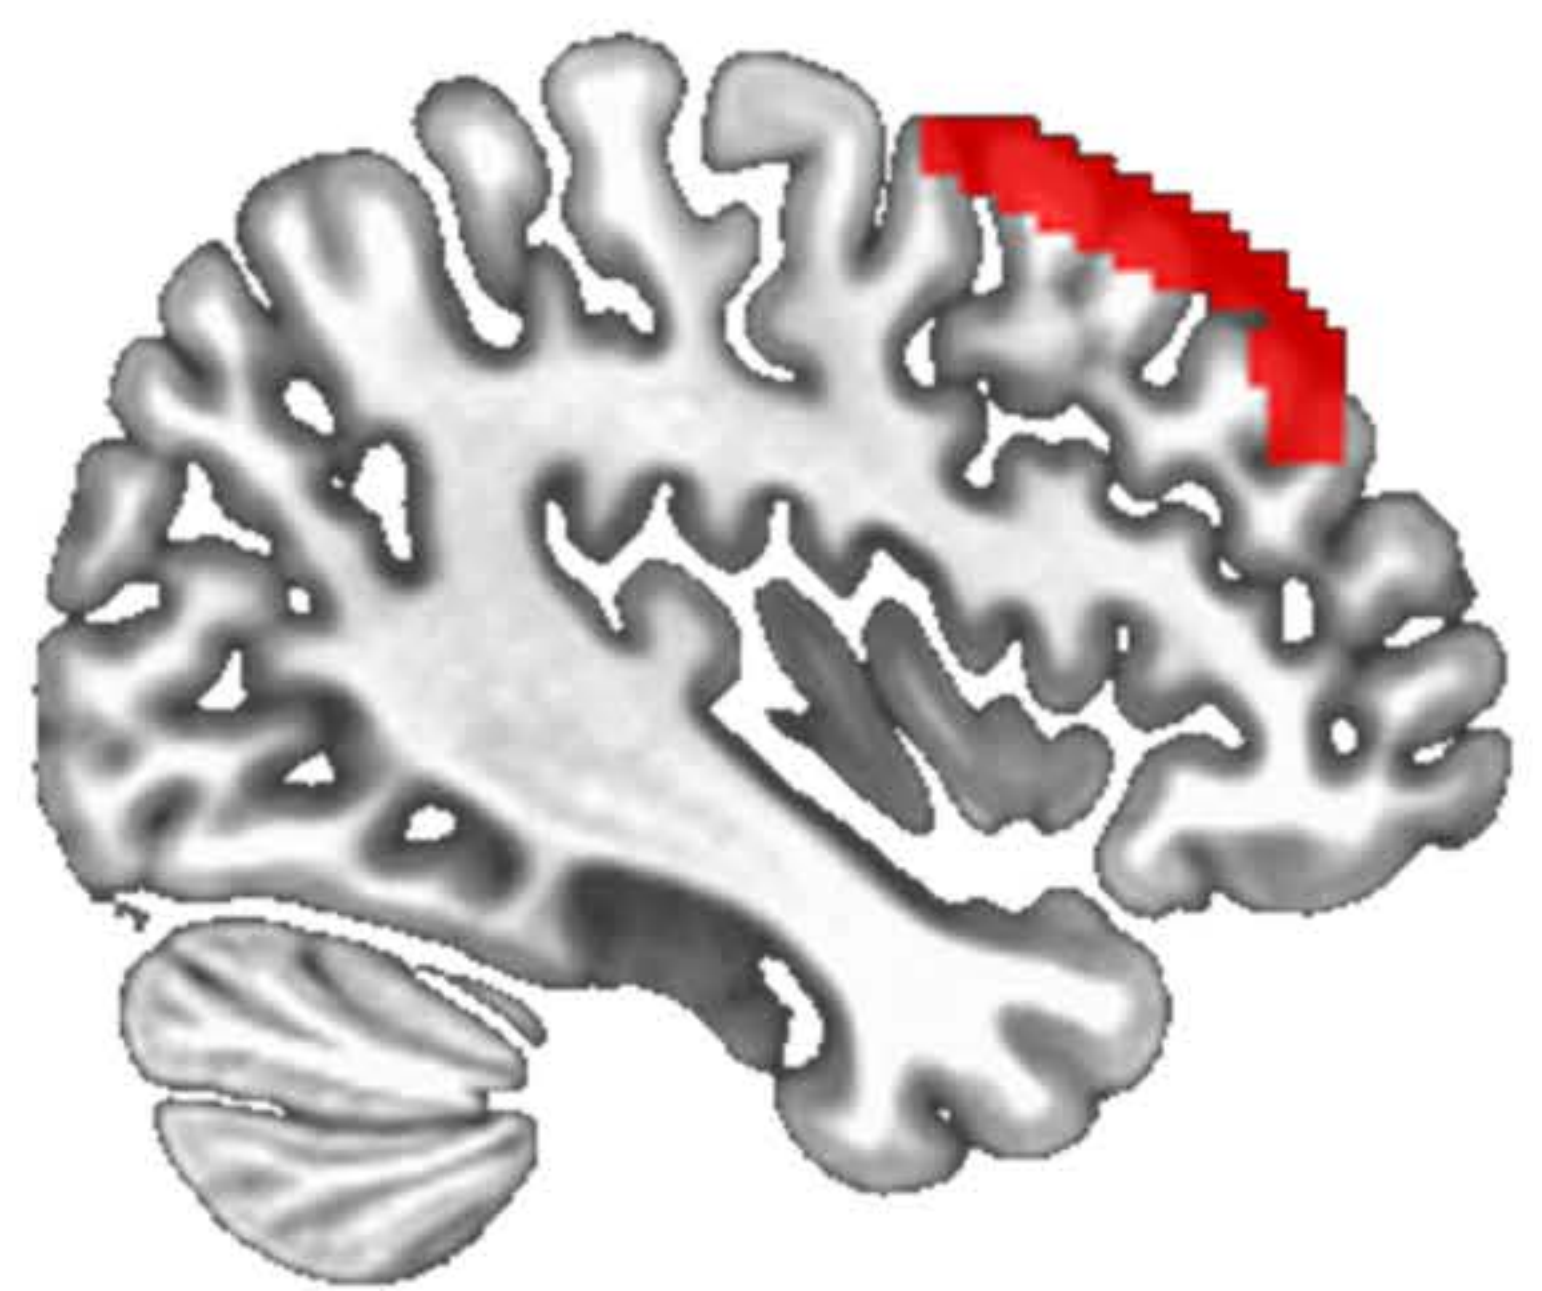



# NDARBP353XD2\_madrs\_left\_dlpfc

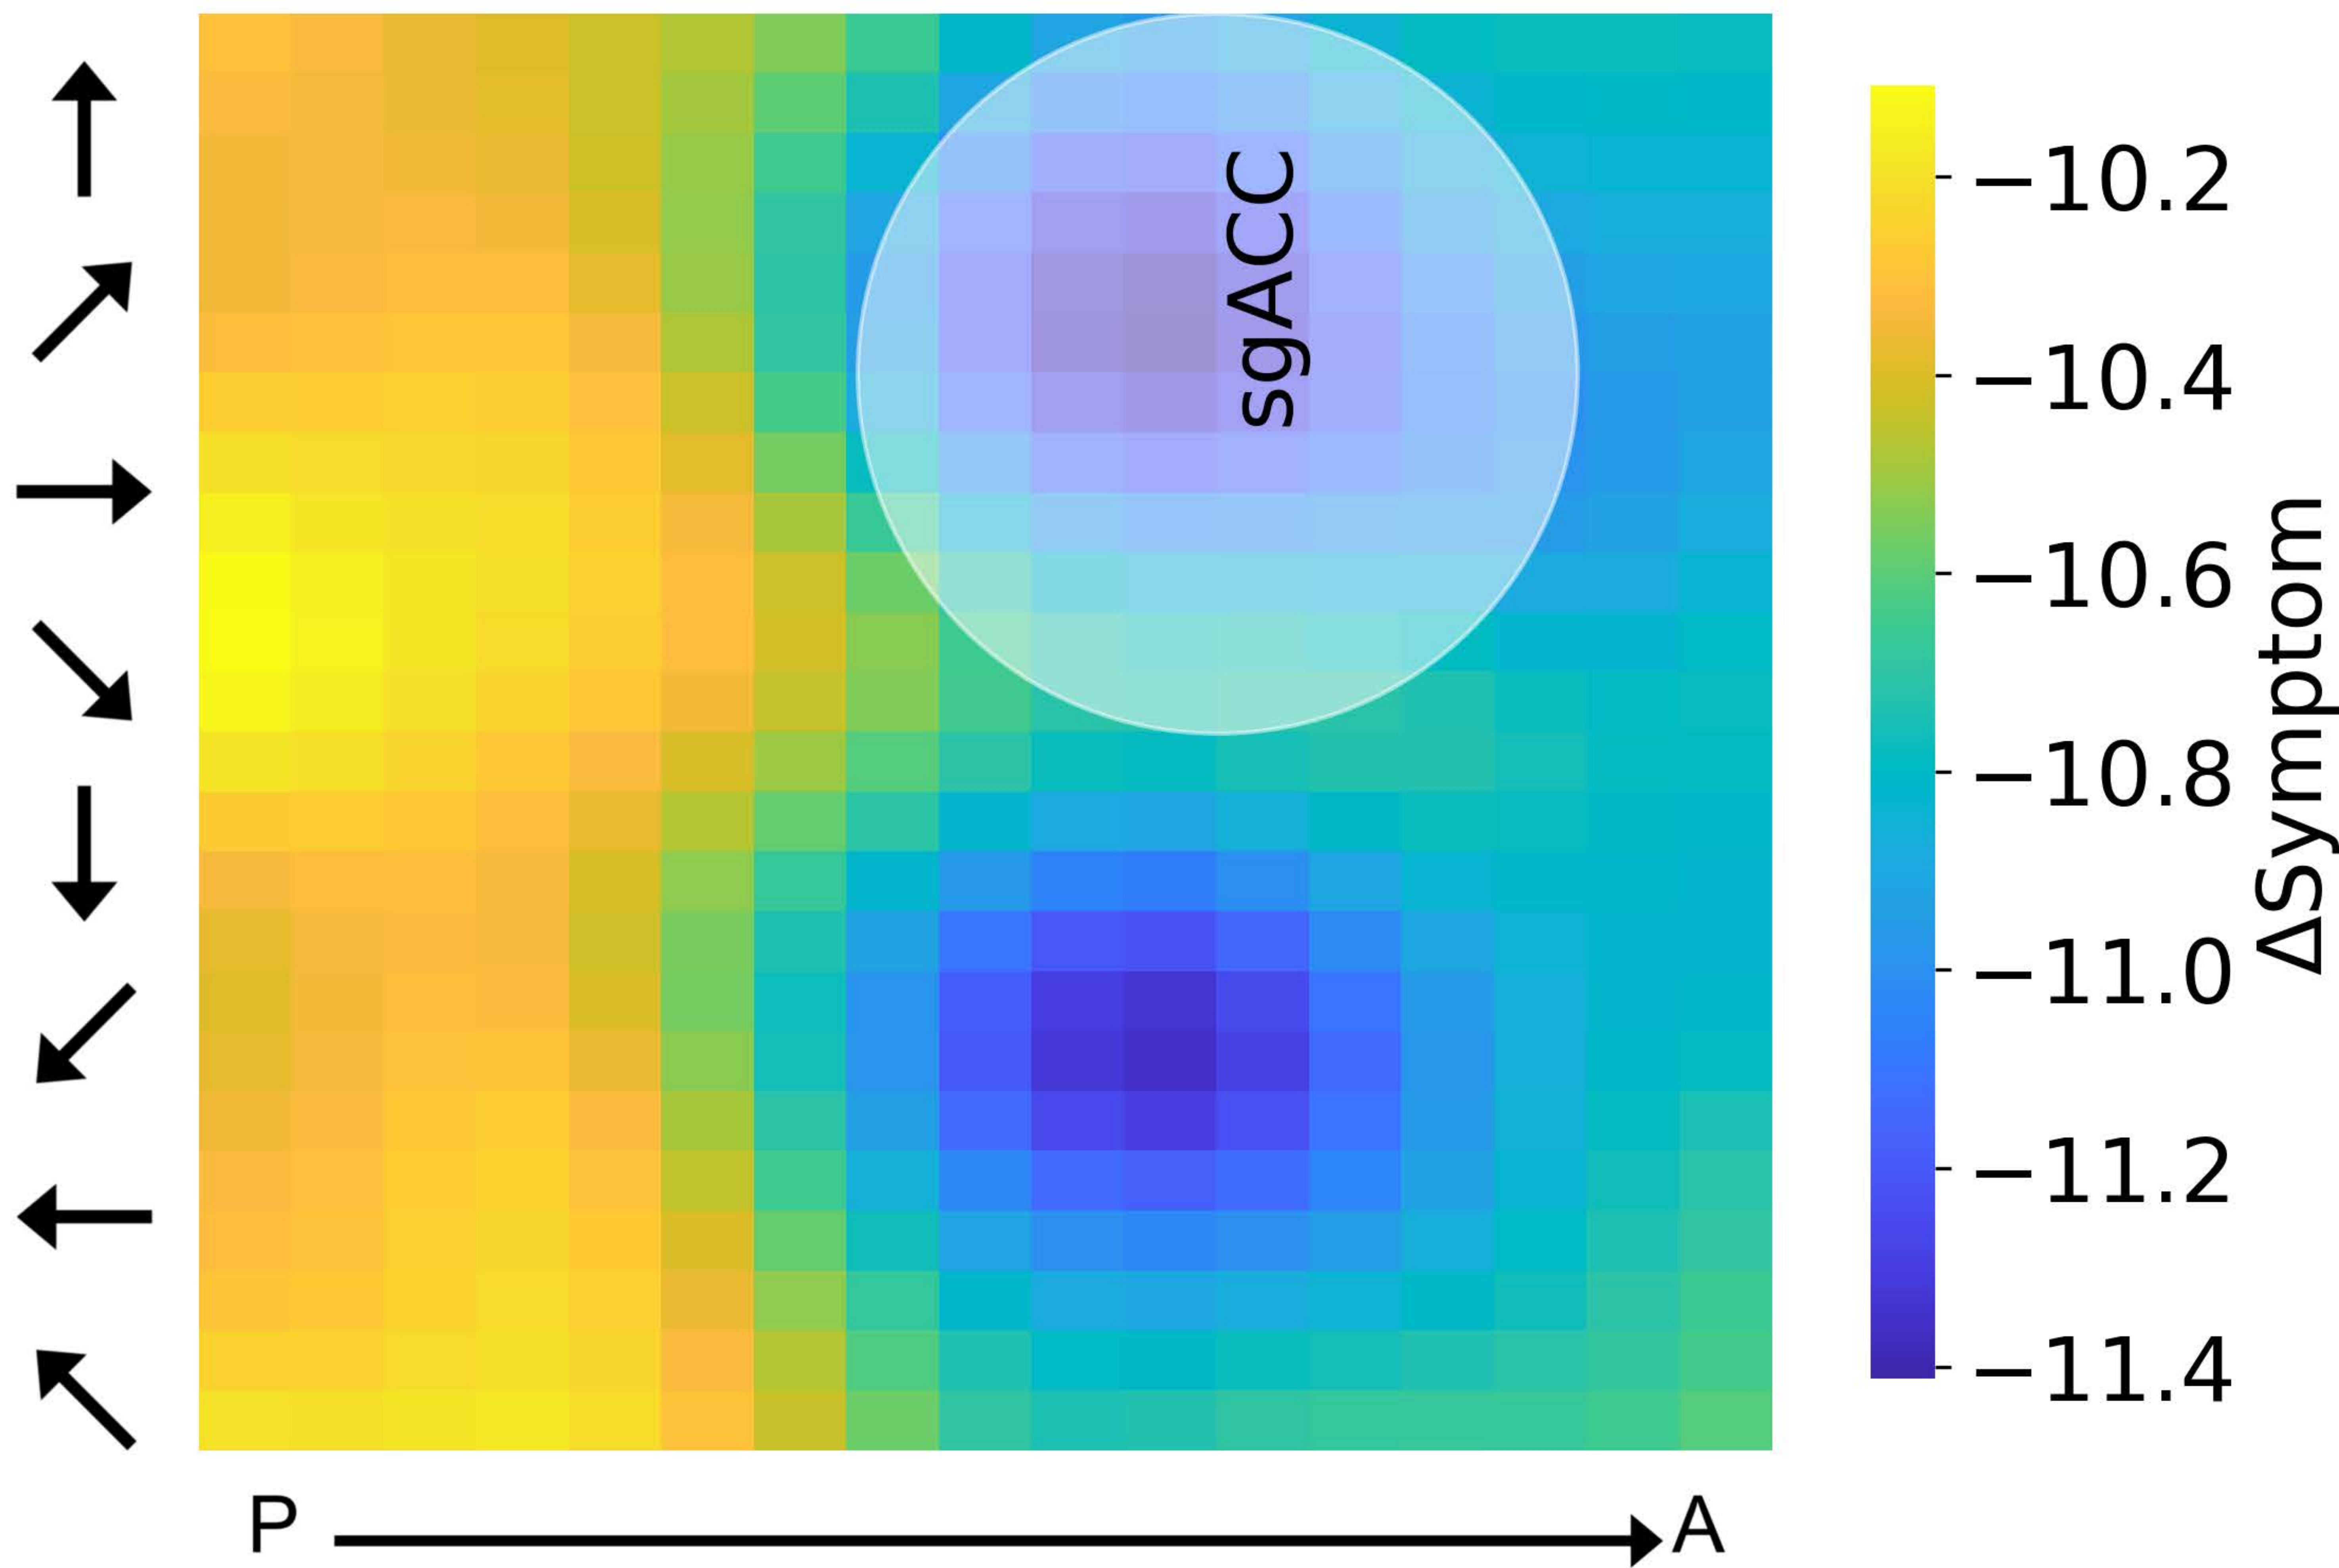



# NDARBT583XH6\_madrs\_left\_dlpfc

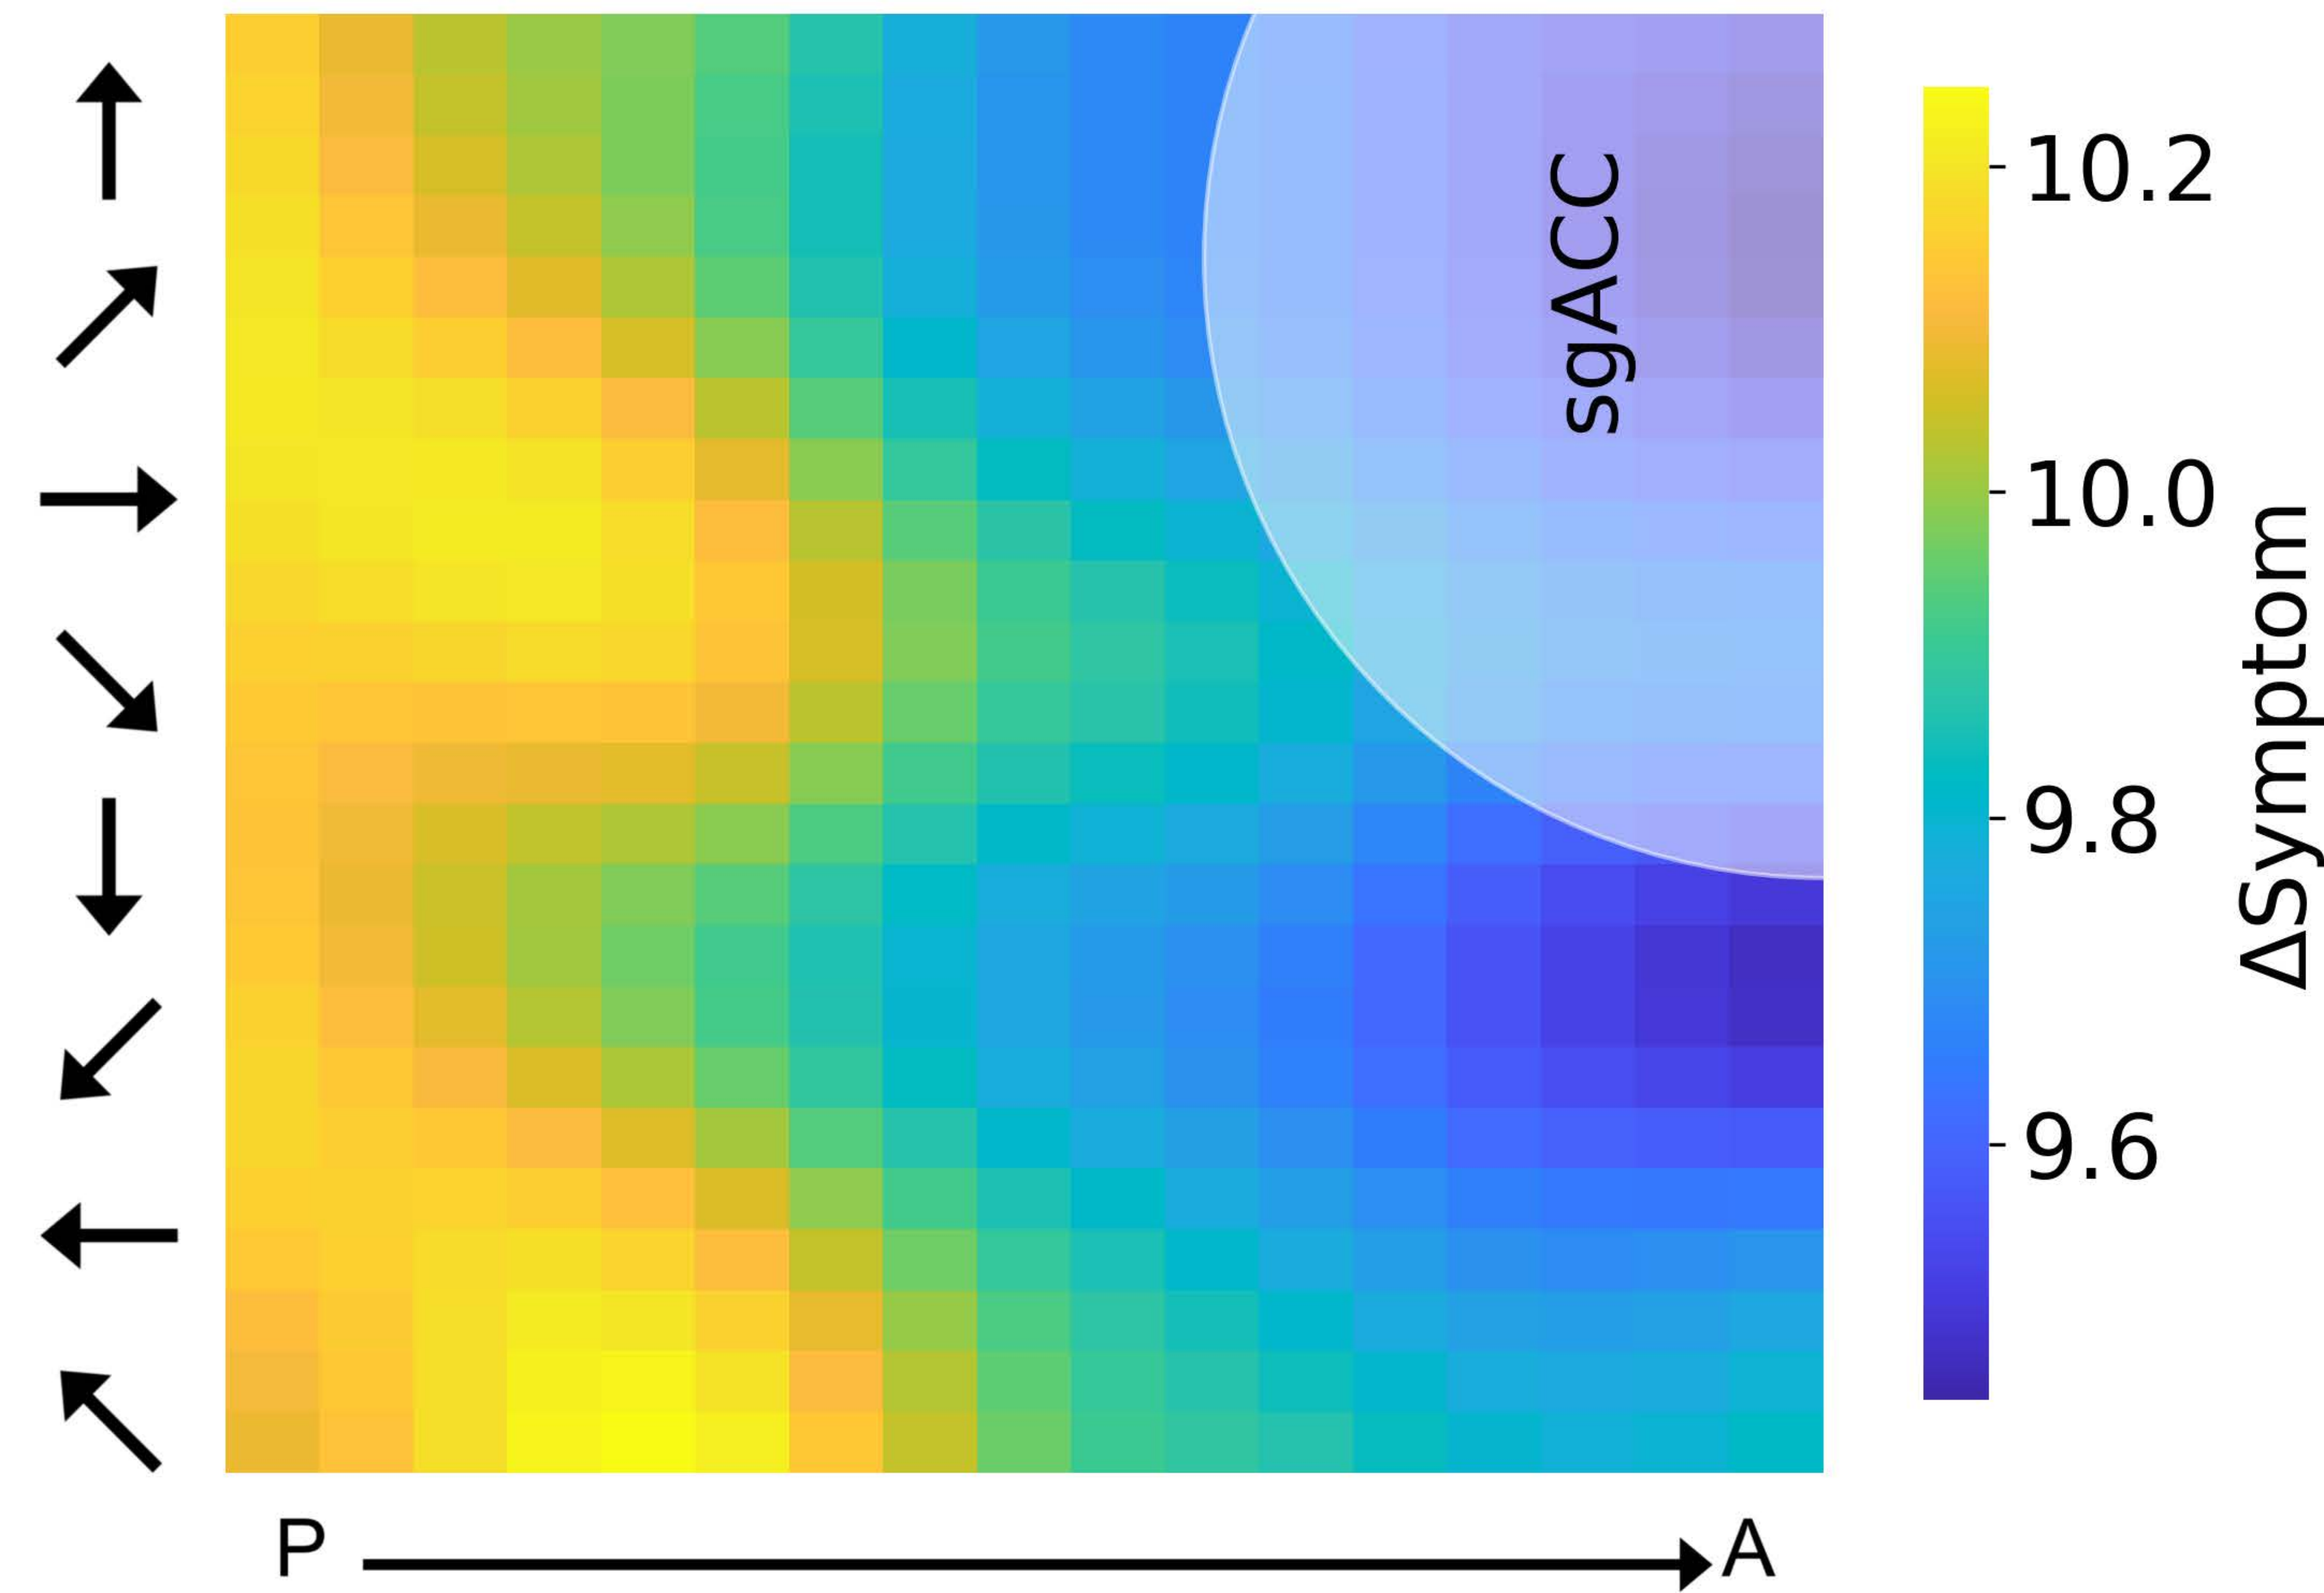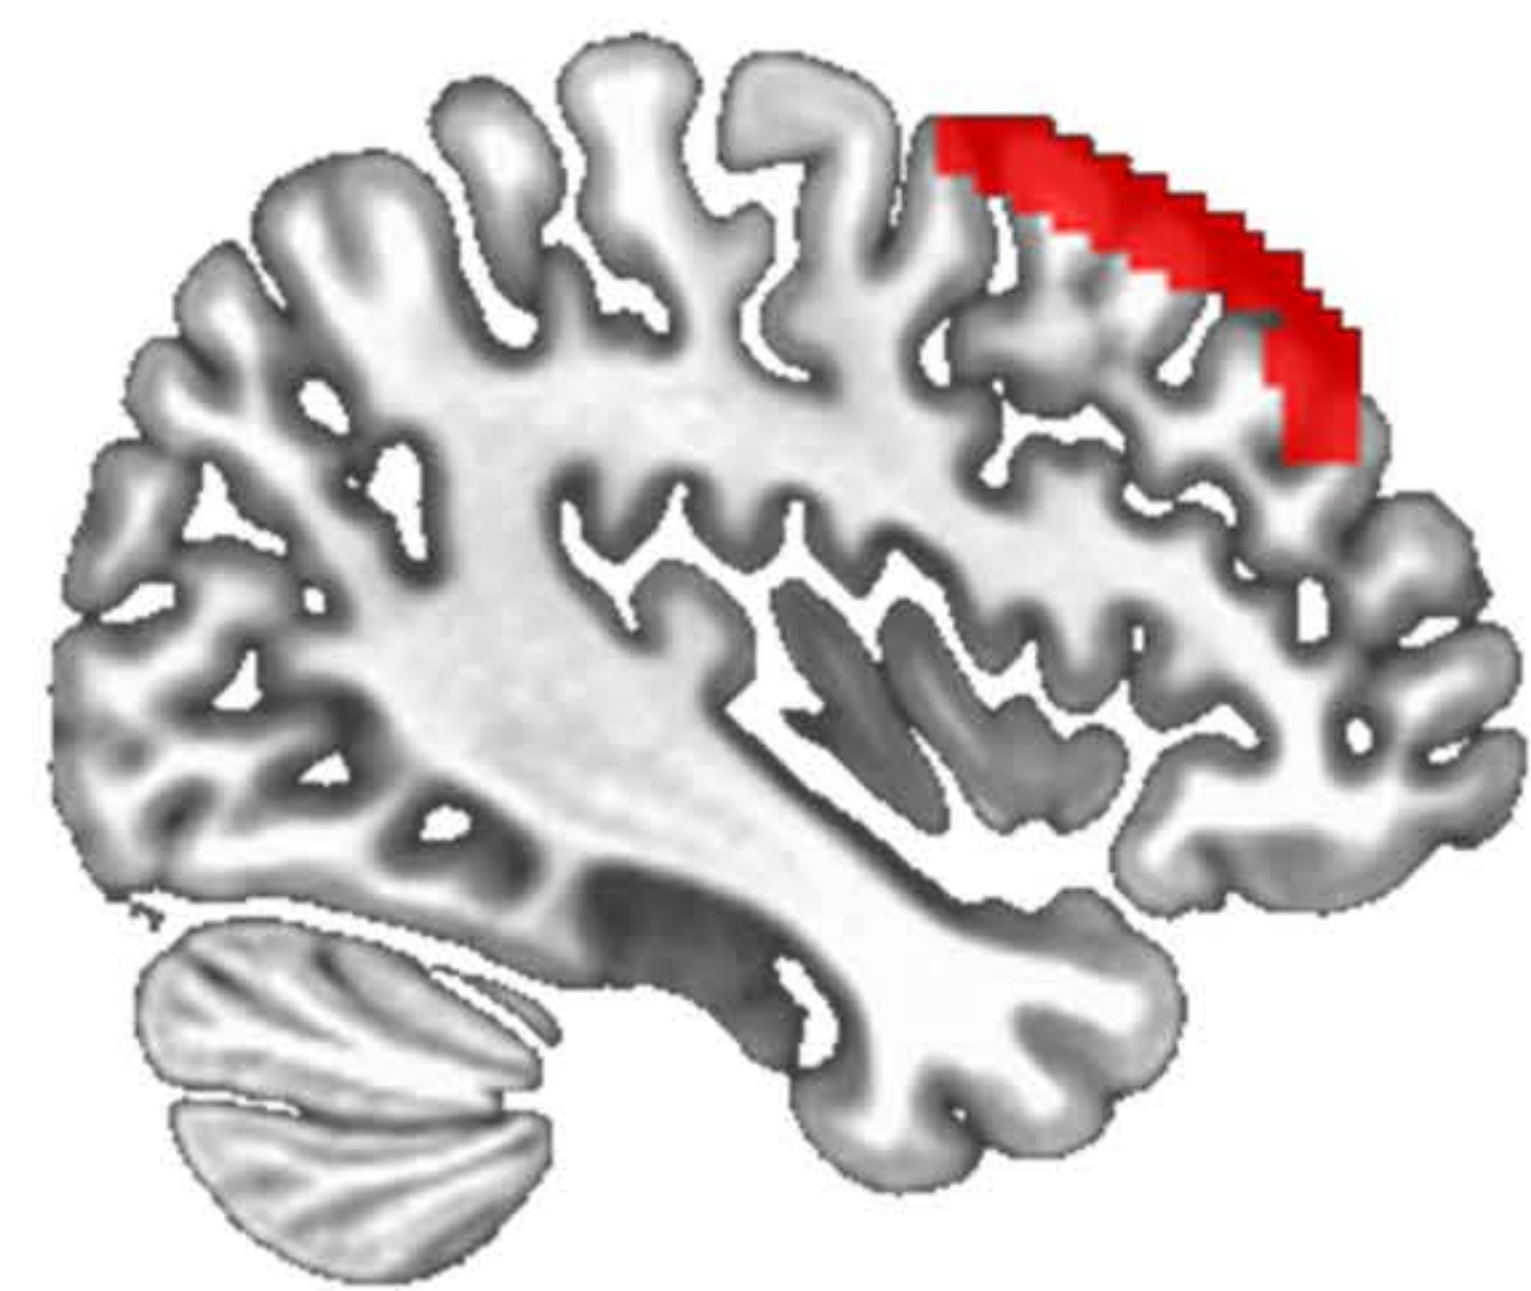



# NDARCG071YN8\_madr\_left\_dlpfc

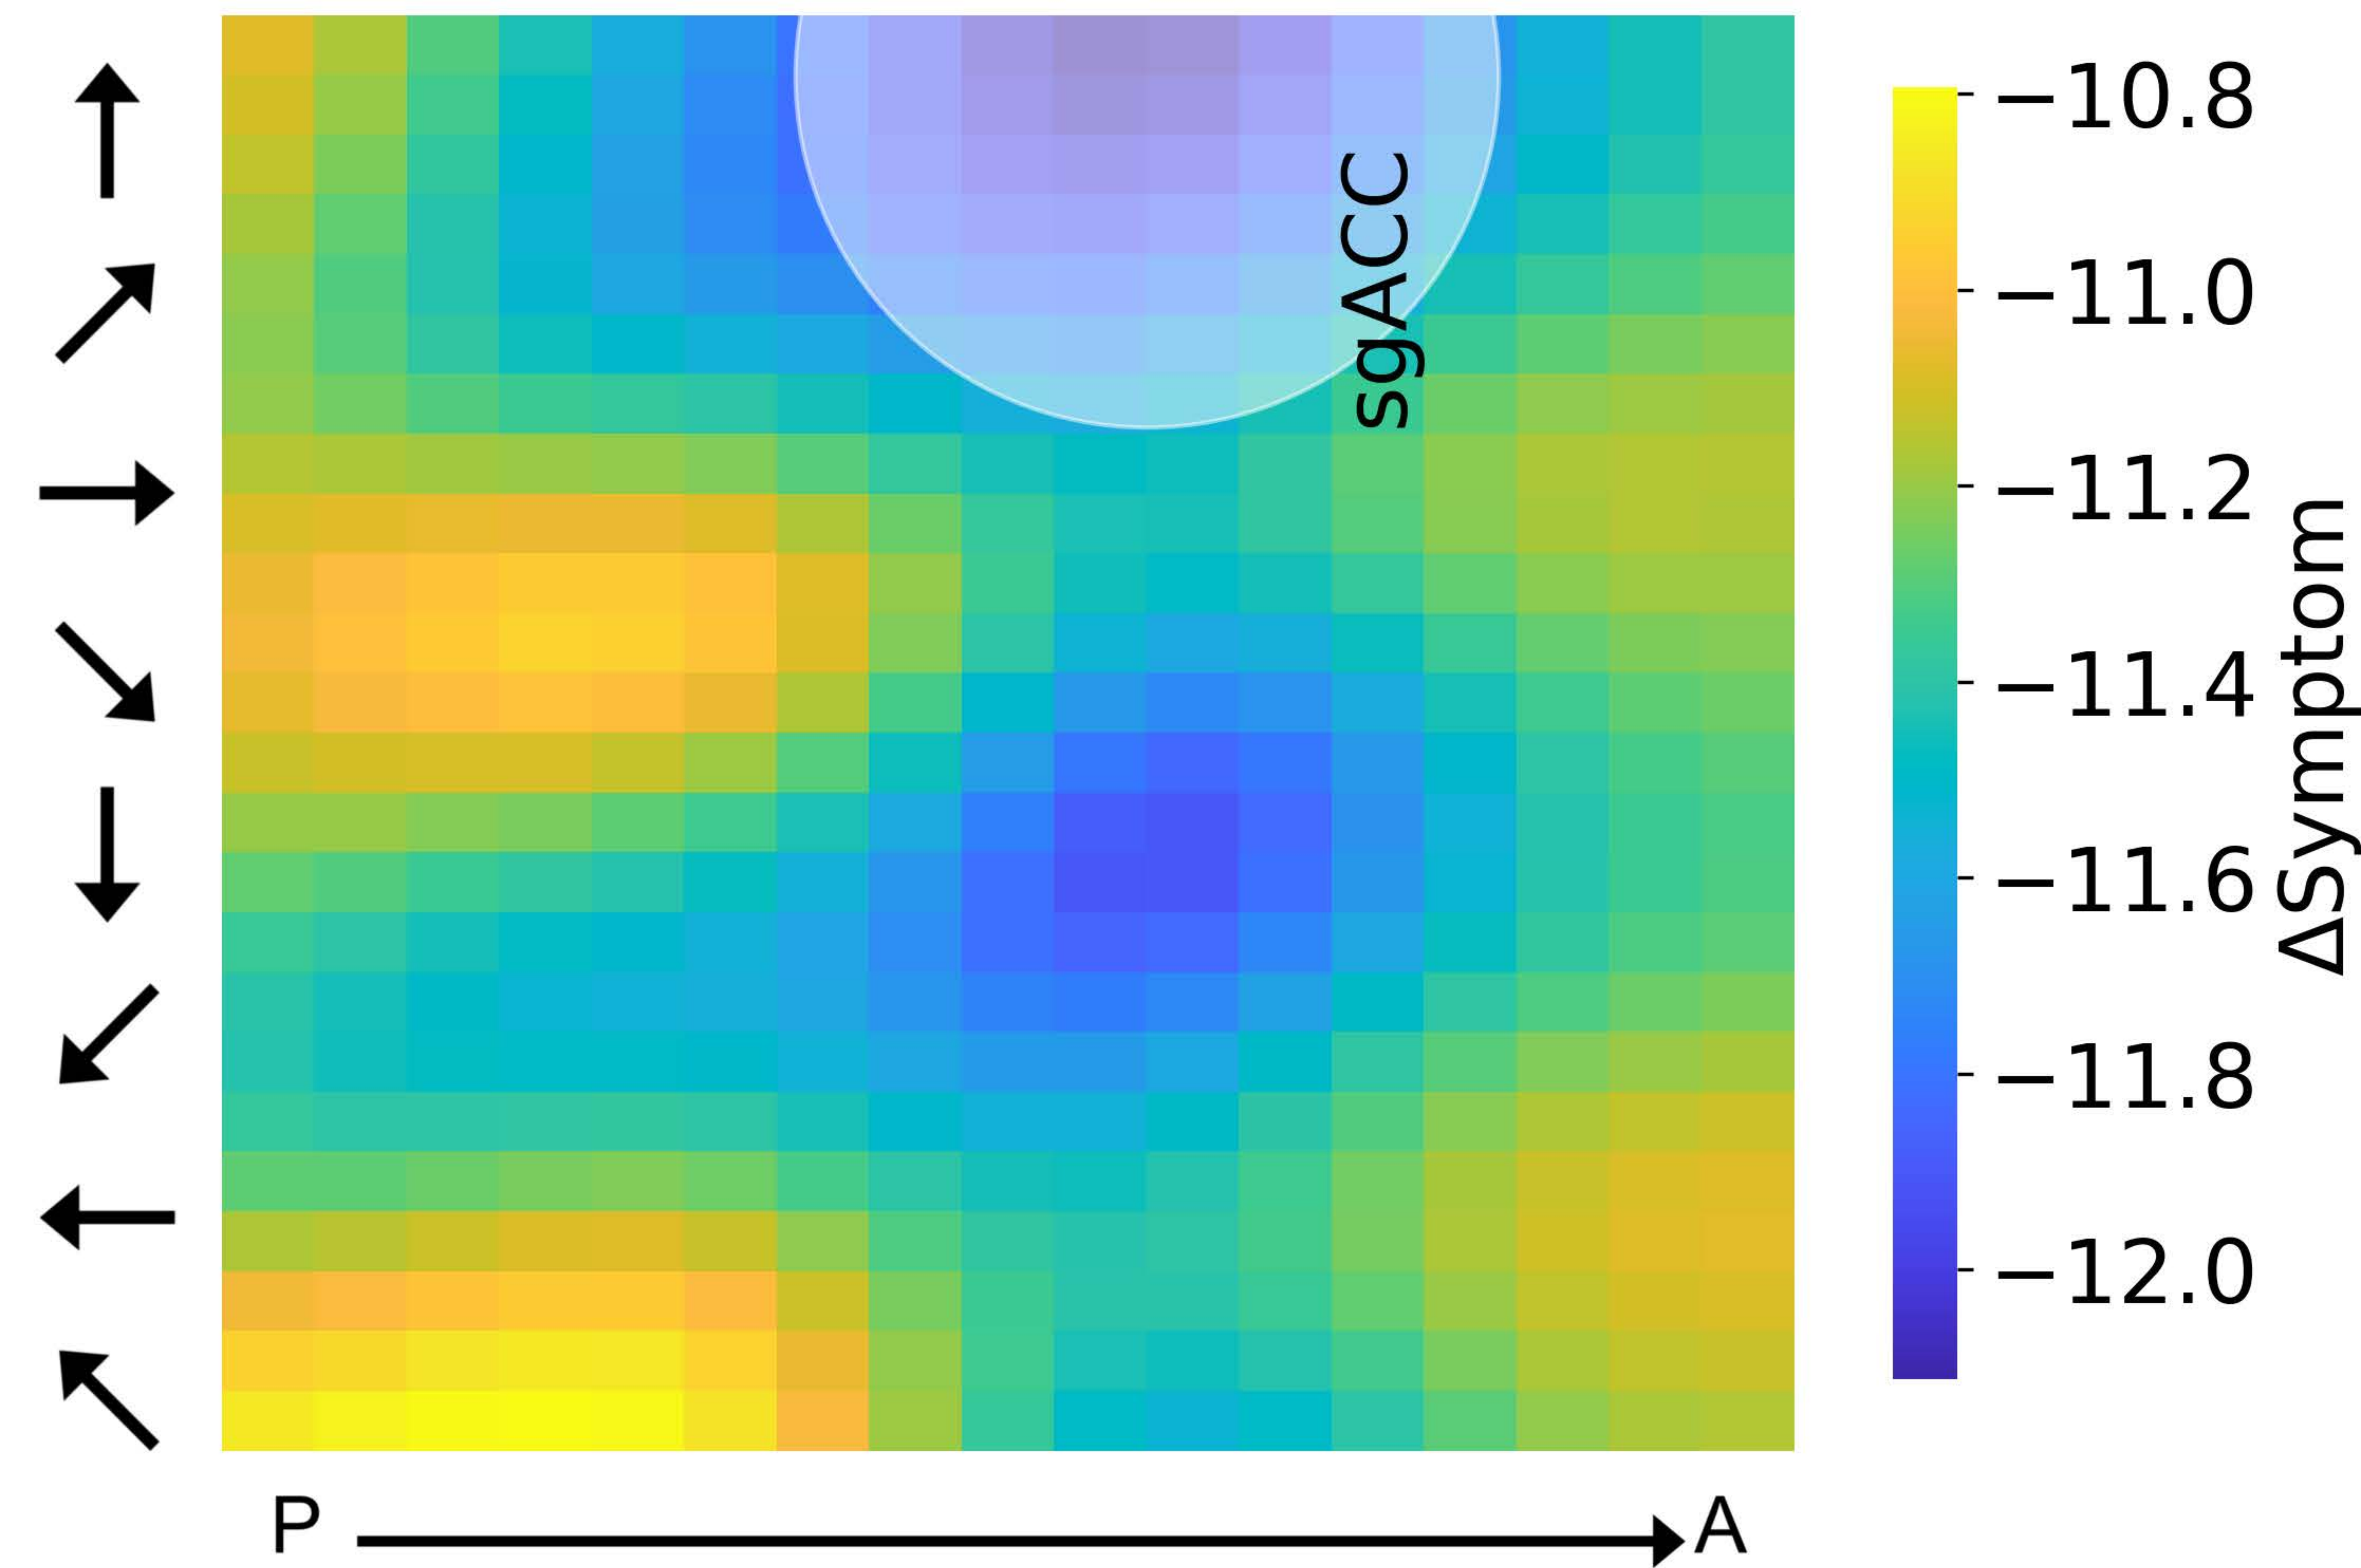



# INDARCG271VGC\_madrs\_left\_dlpfc

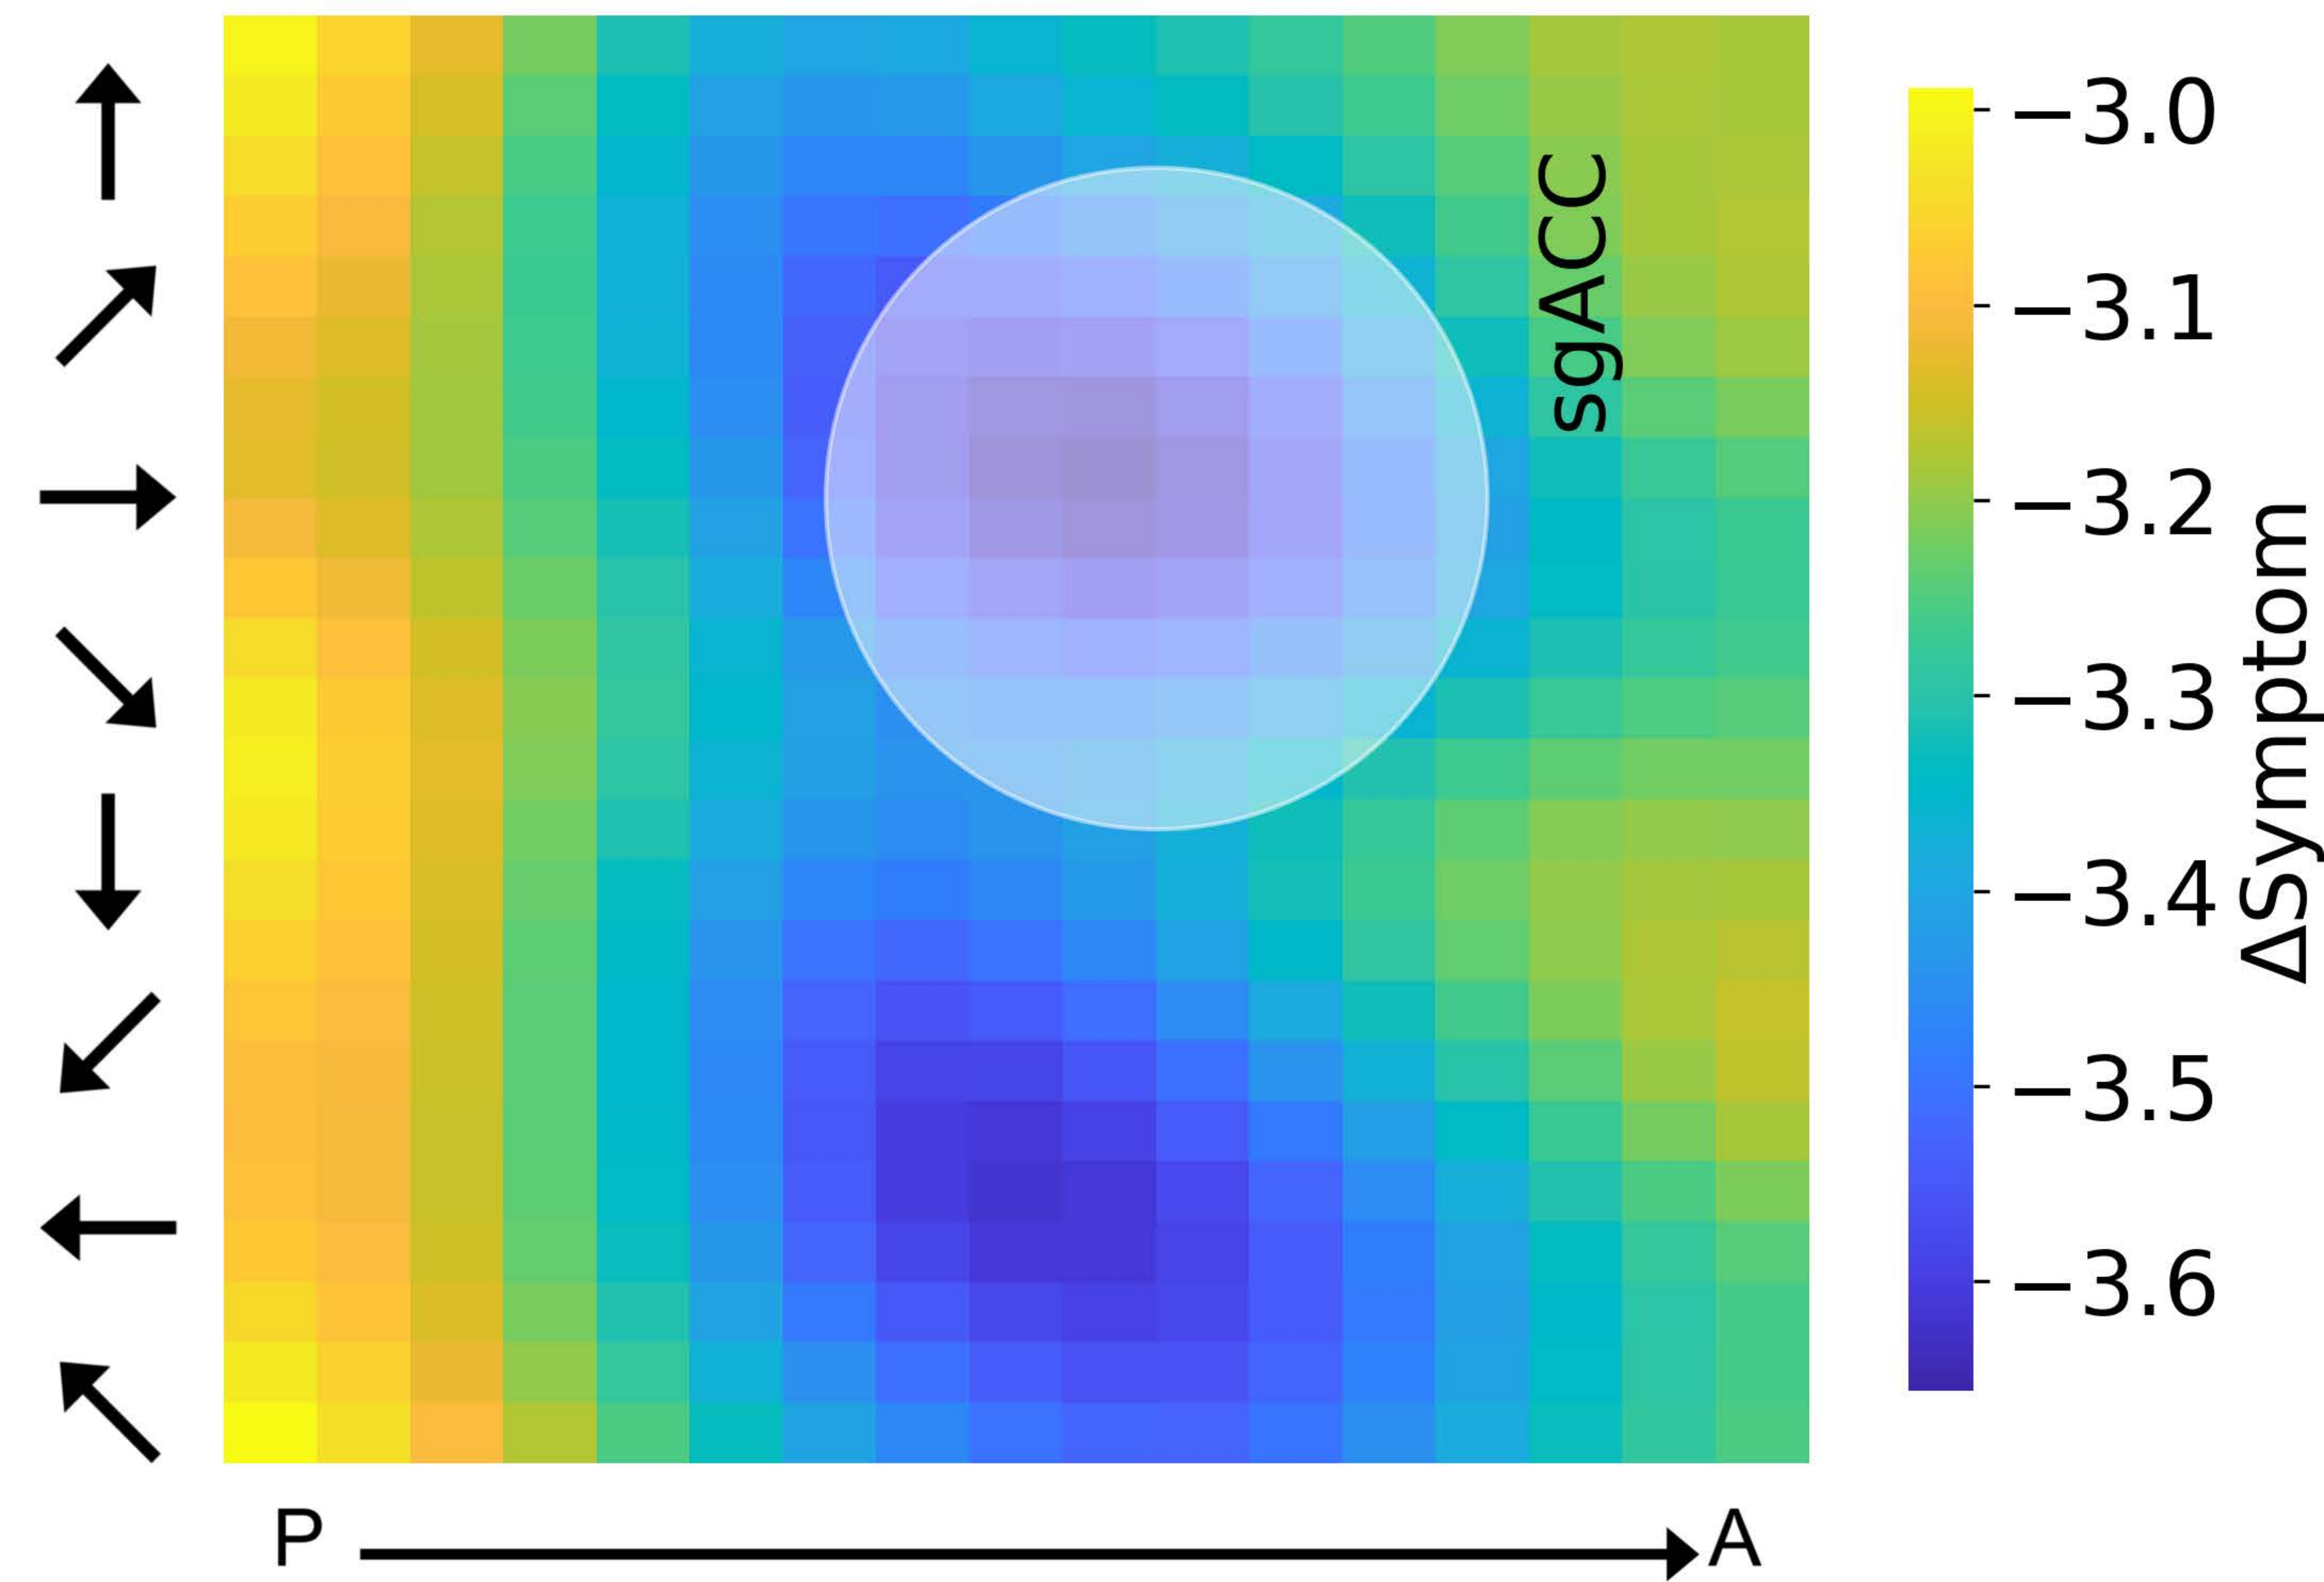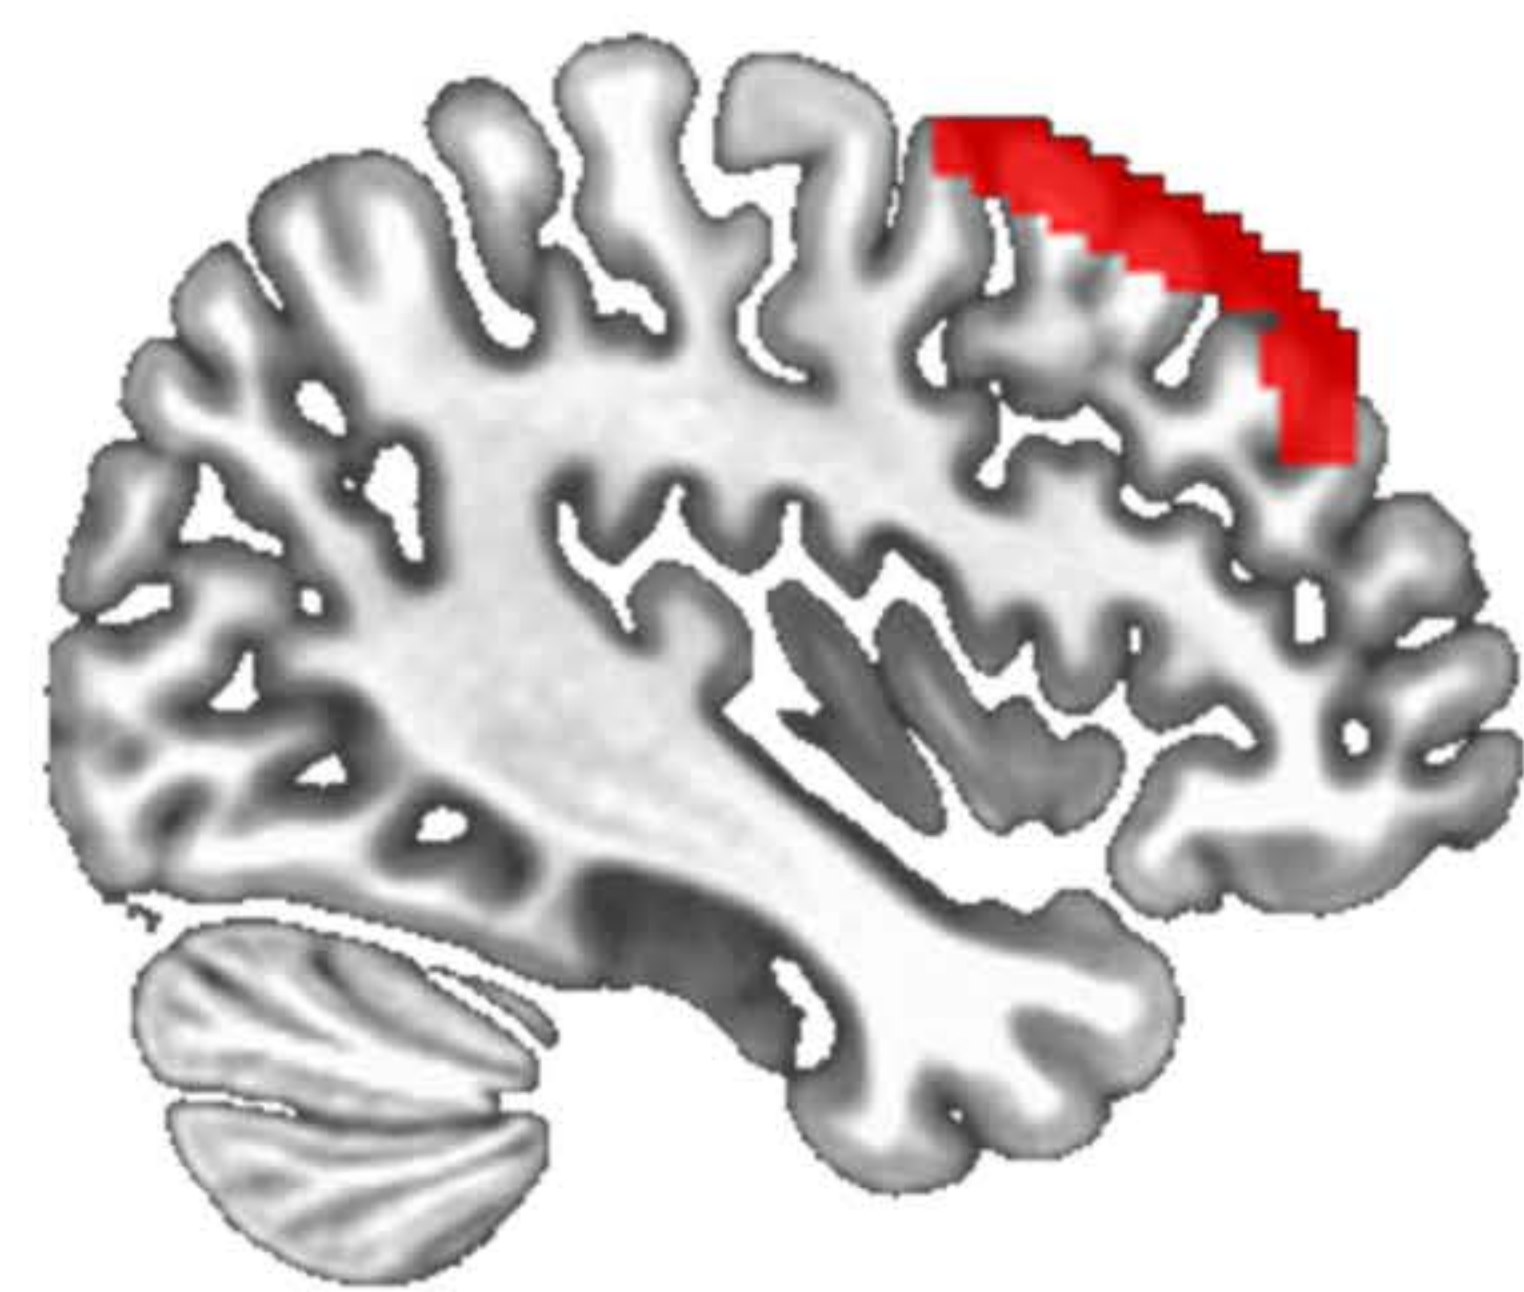



# NDARCM769WZL\_madrs\_left\_dlpfc

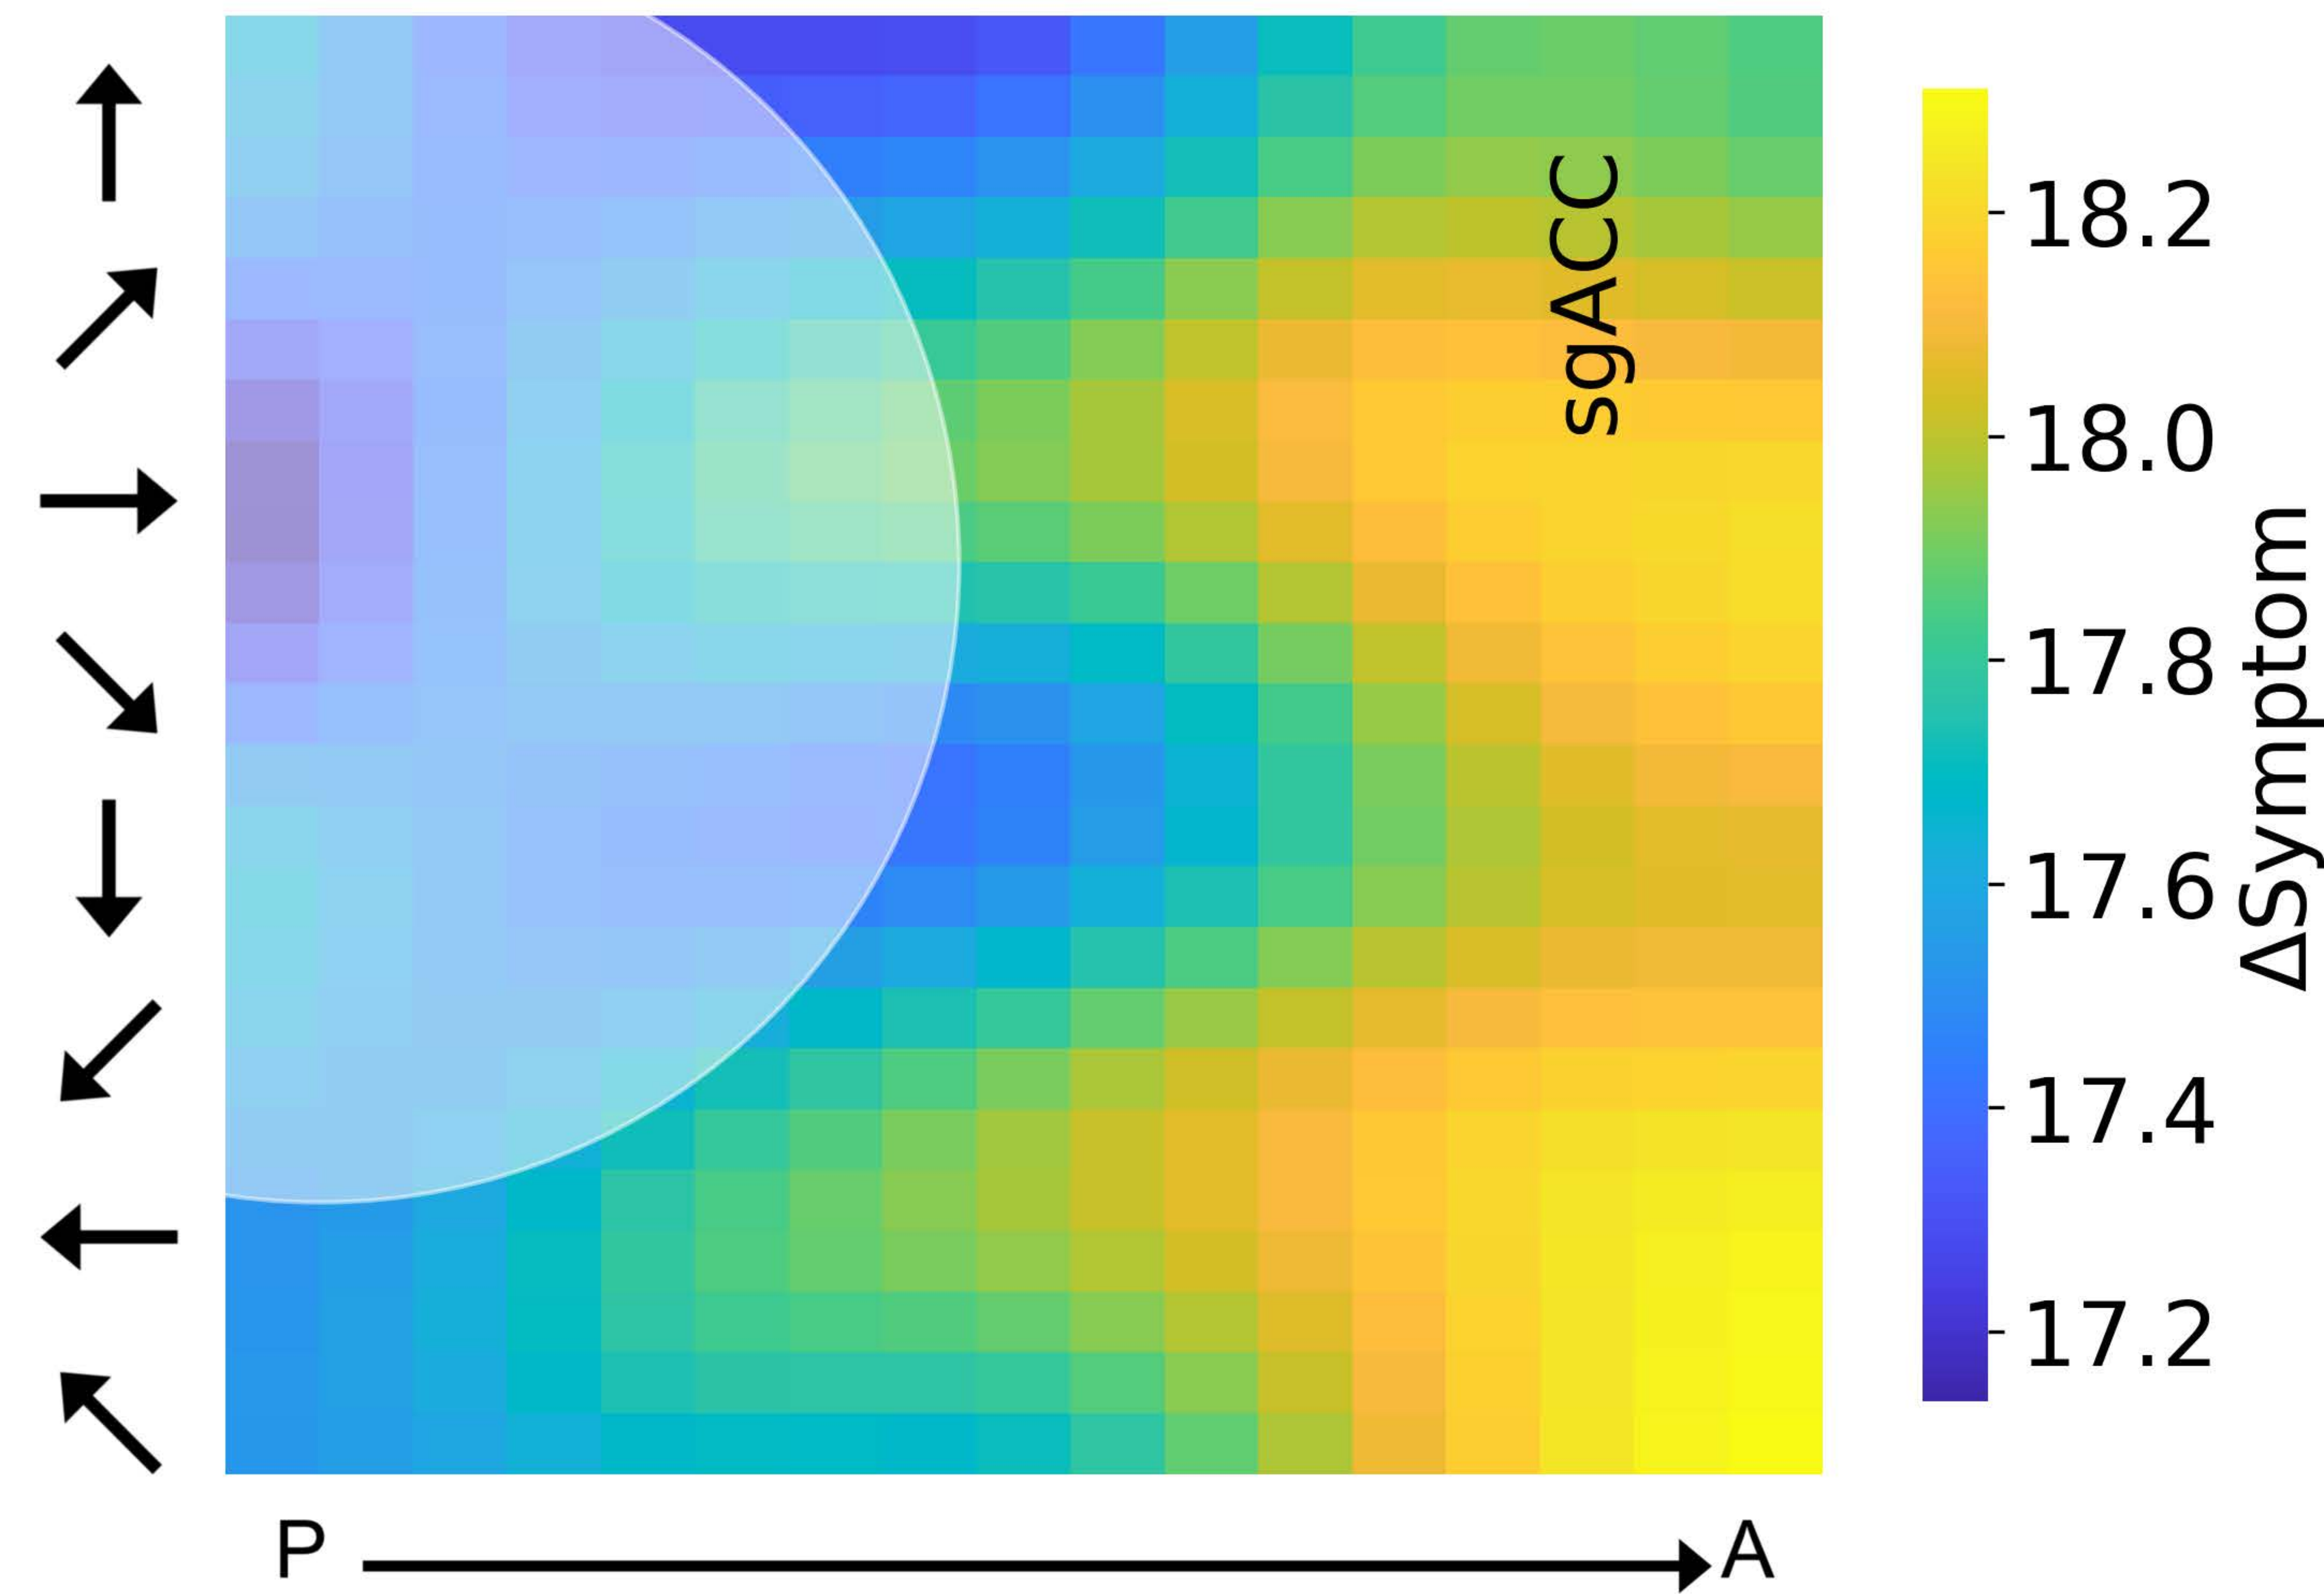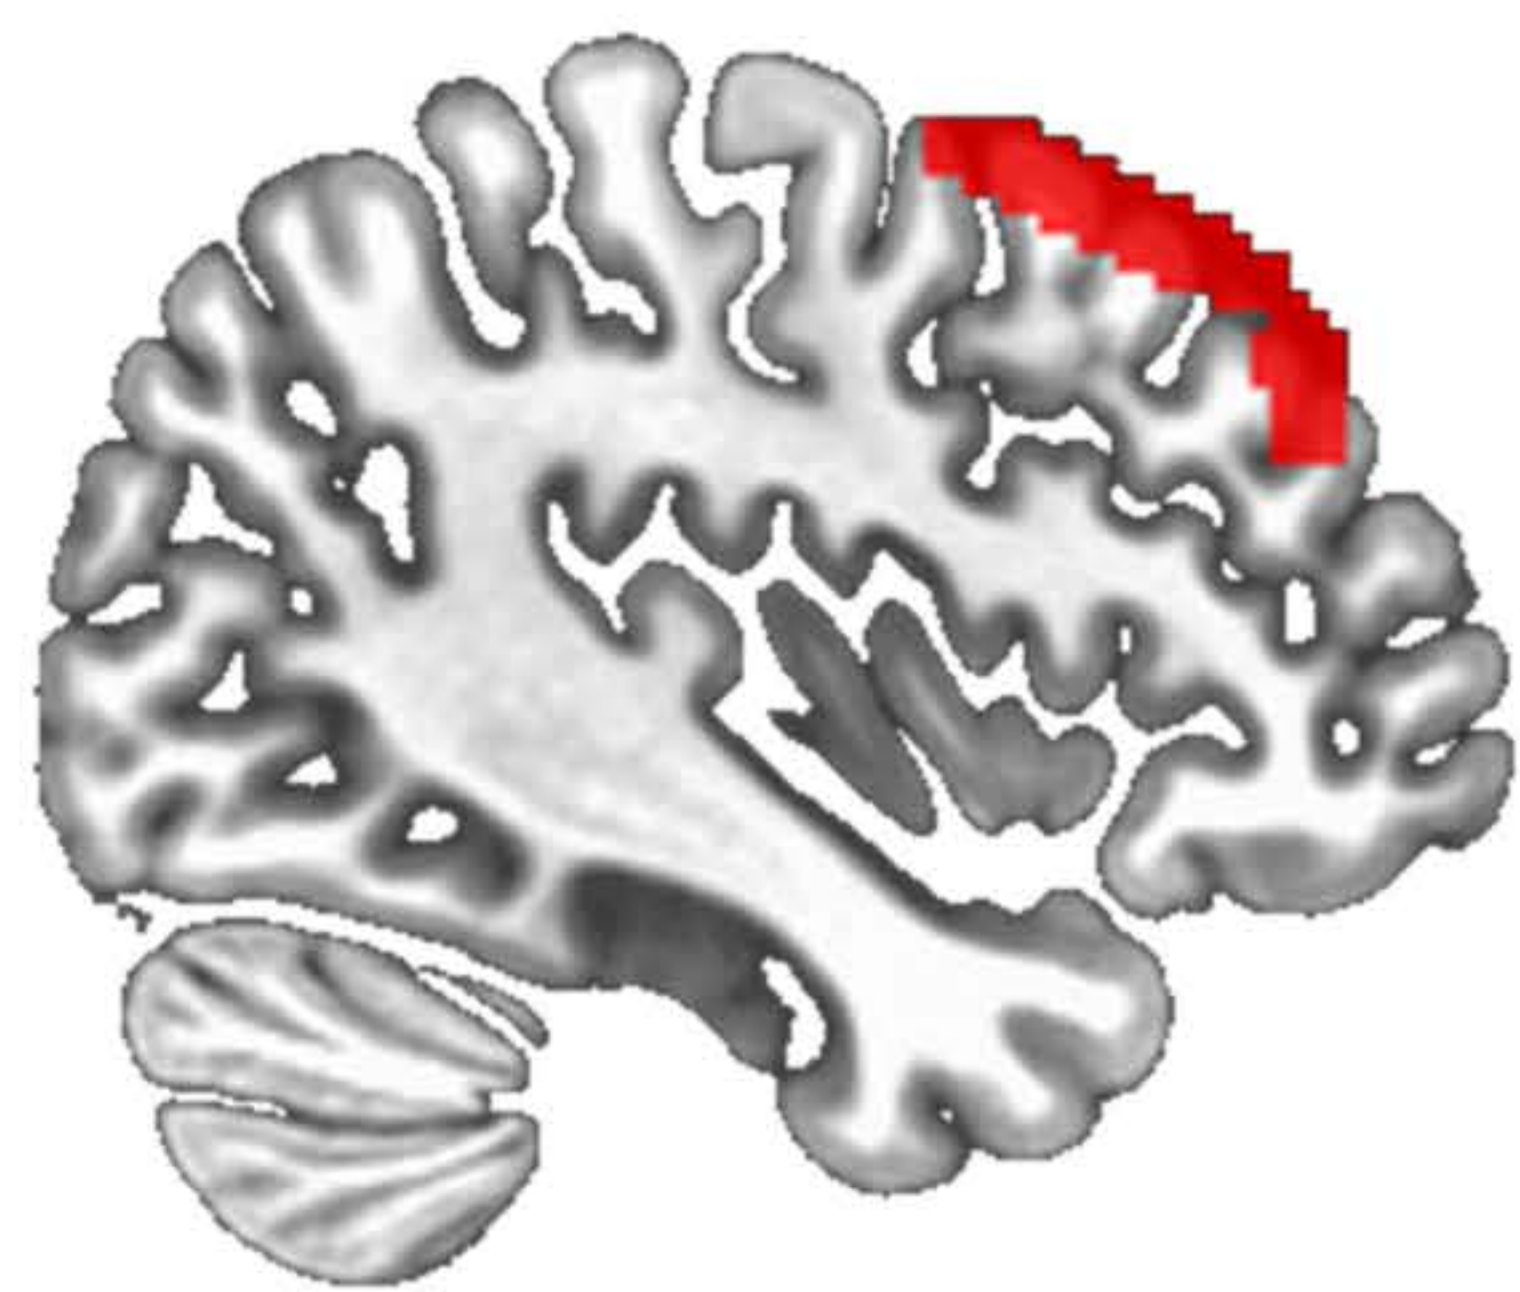



# NDARDL291XT0\_madrs\_left\_dlpfc

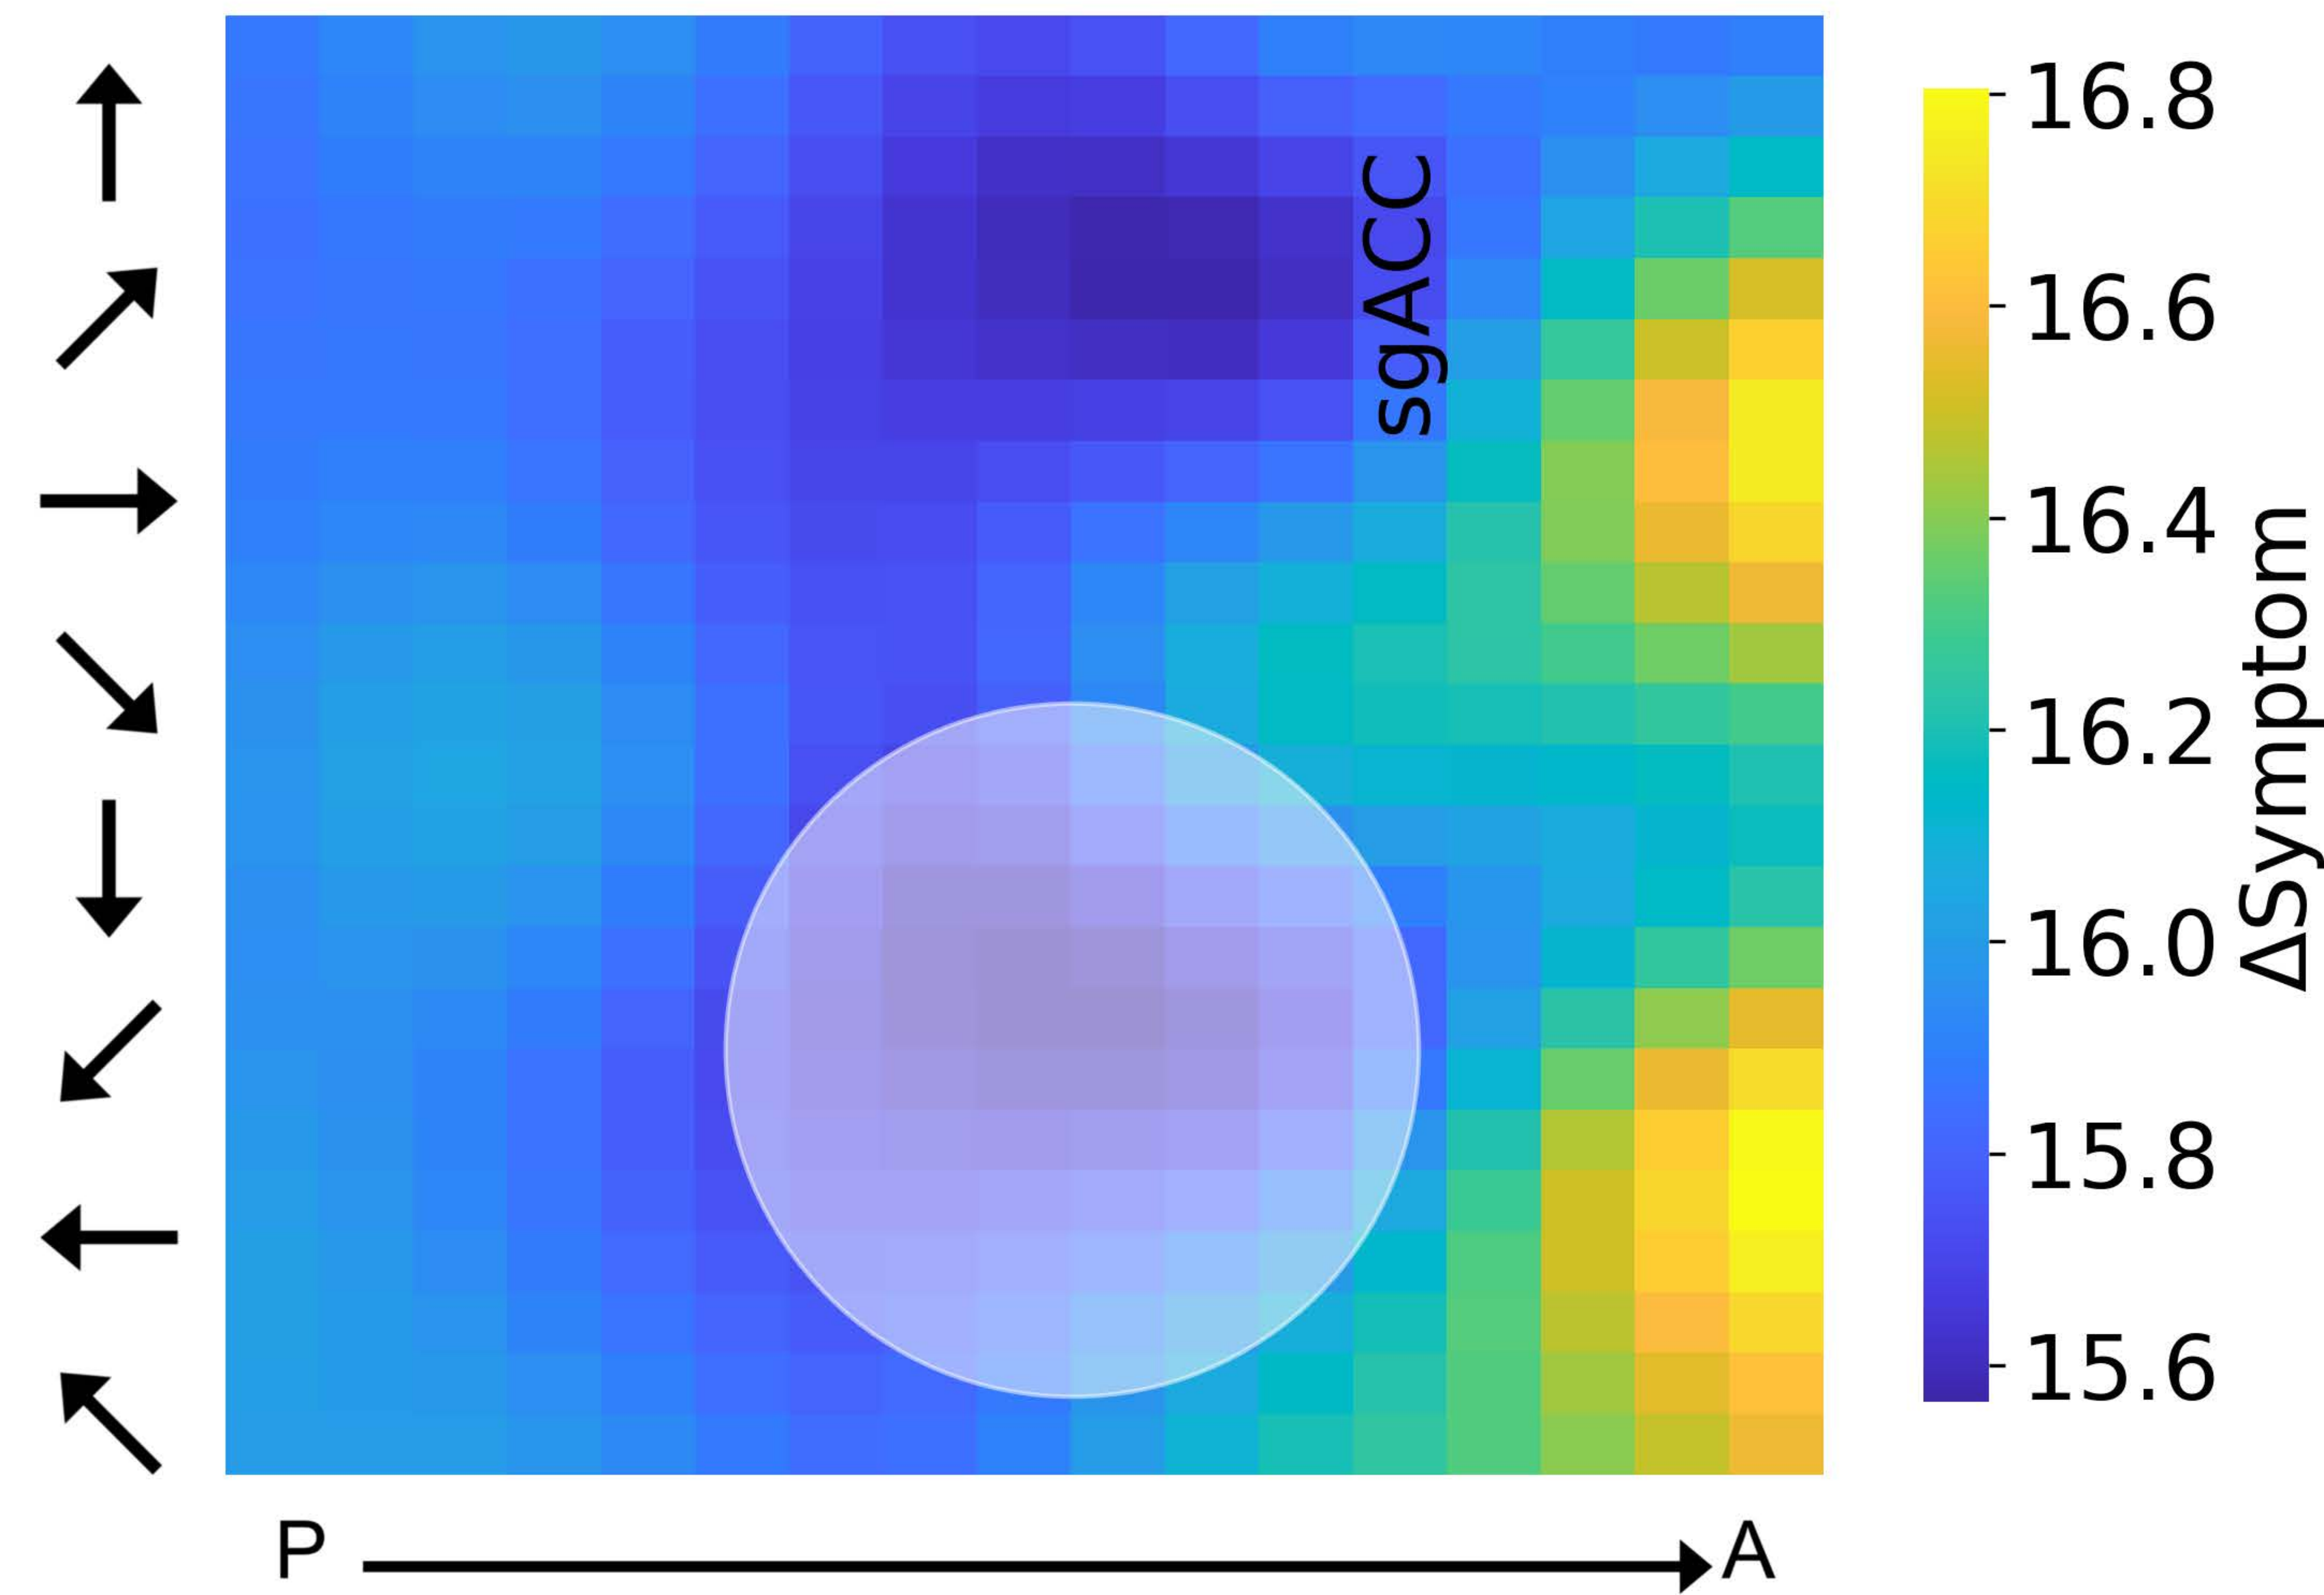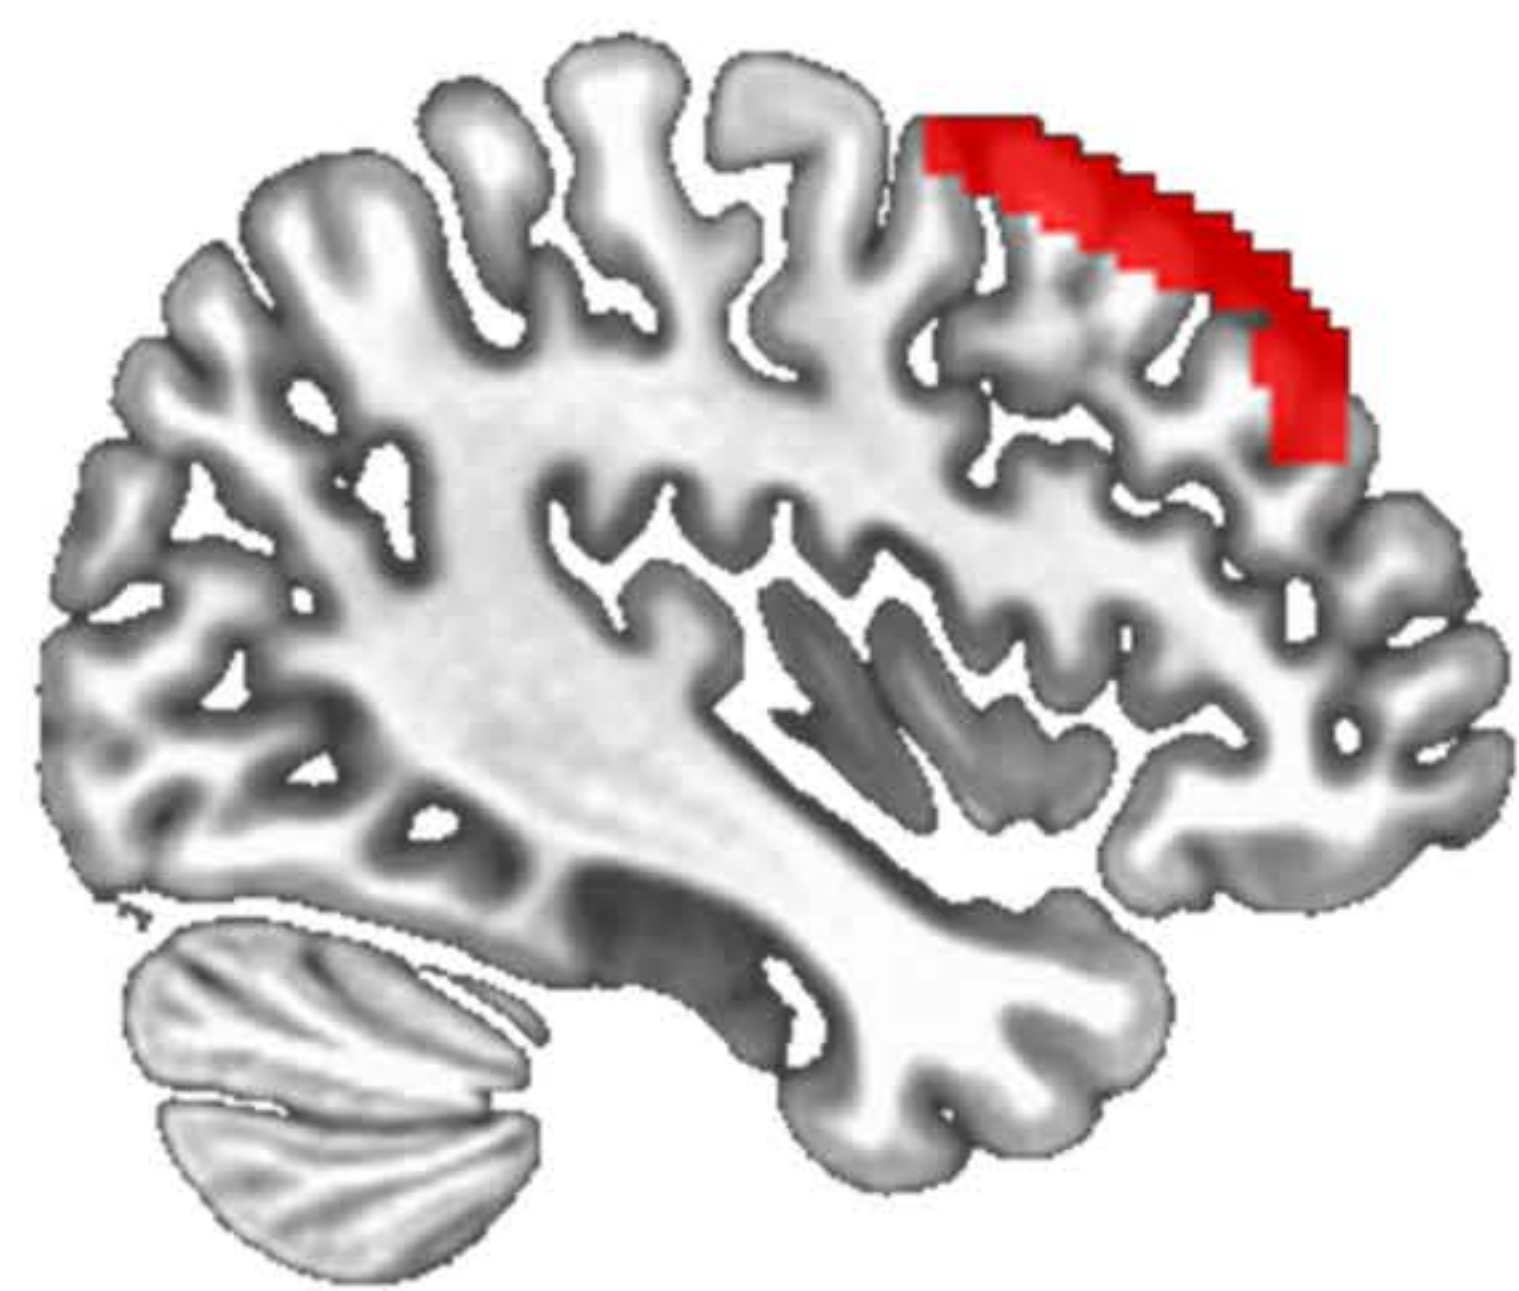



# INDARDL667VMW\_madrs\_left\_dlpfc

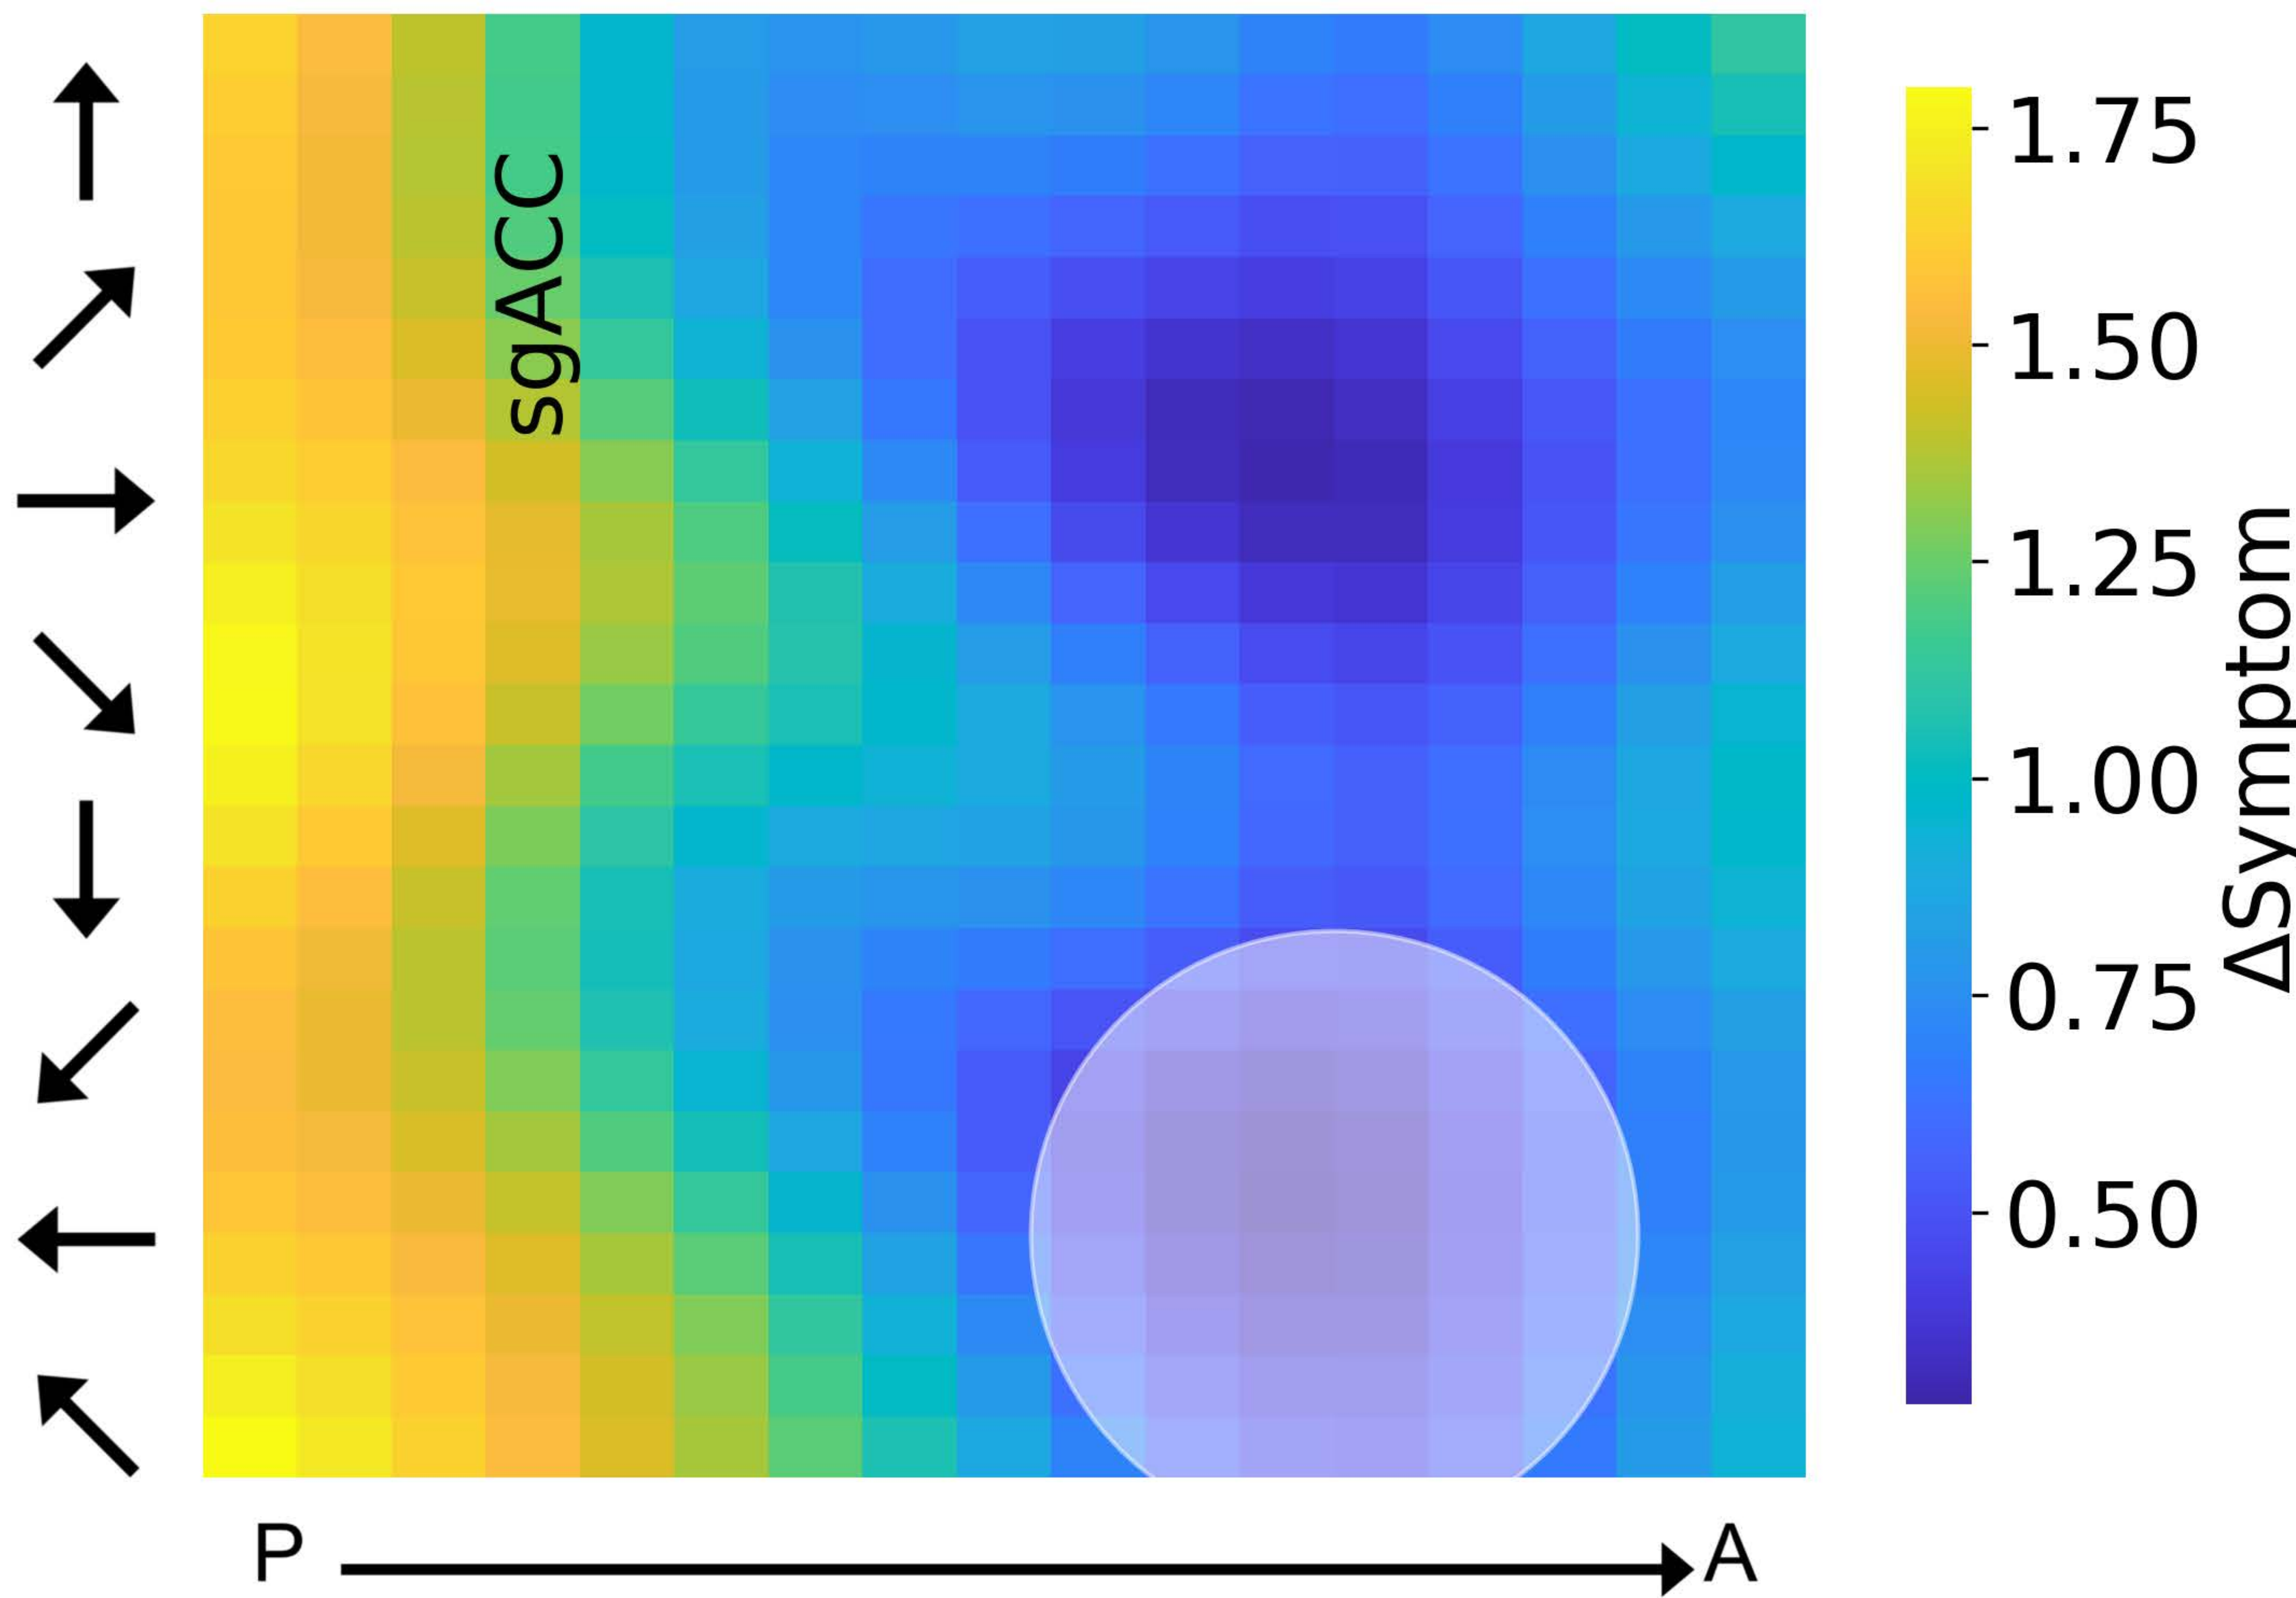



# INDARDR017YX2\_madrs\_left\_dlpfc

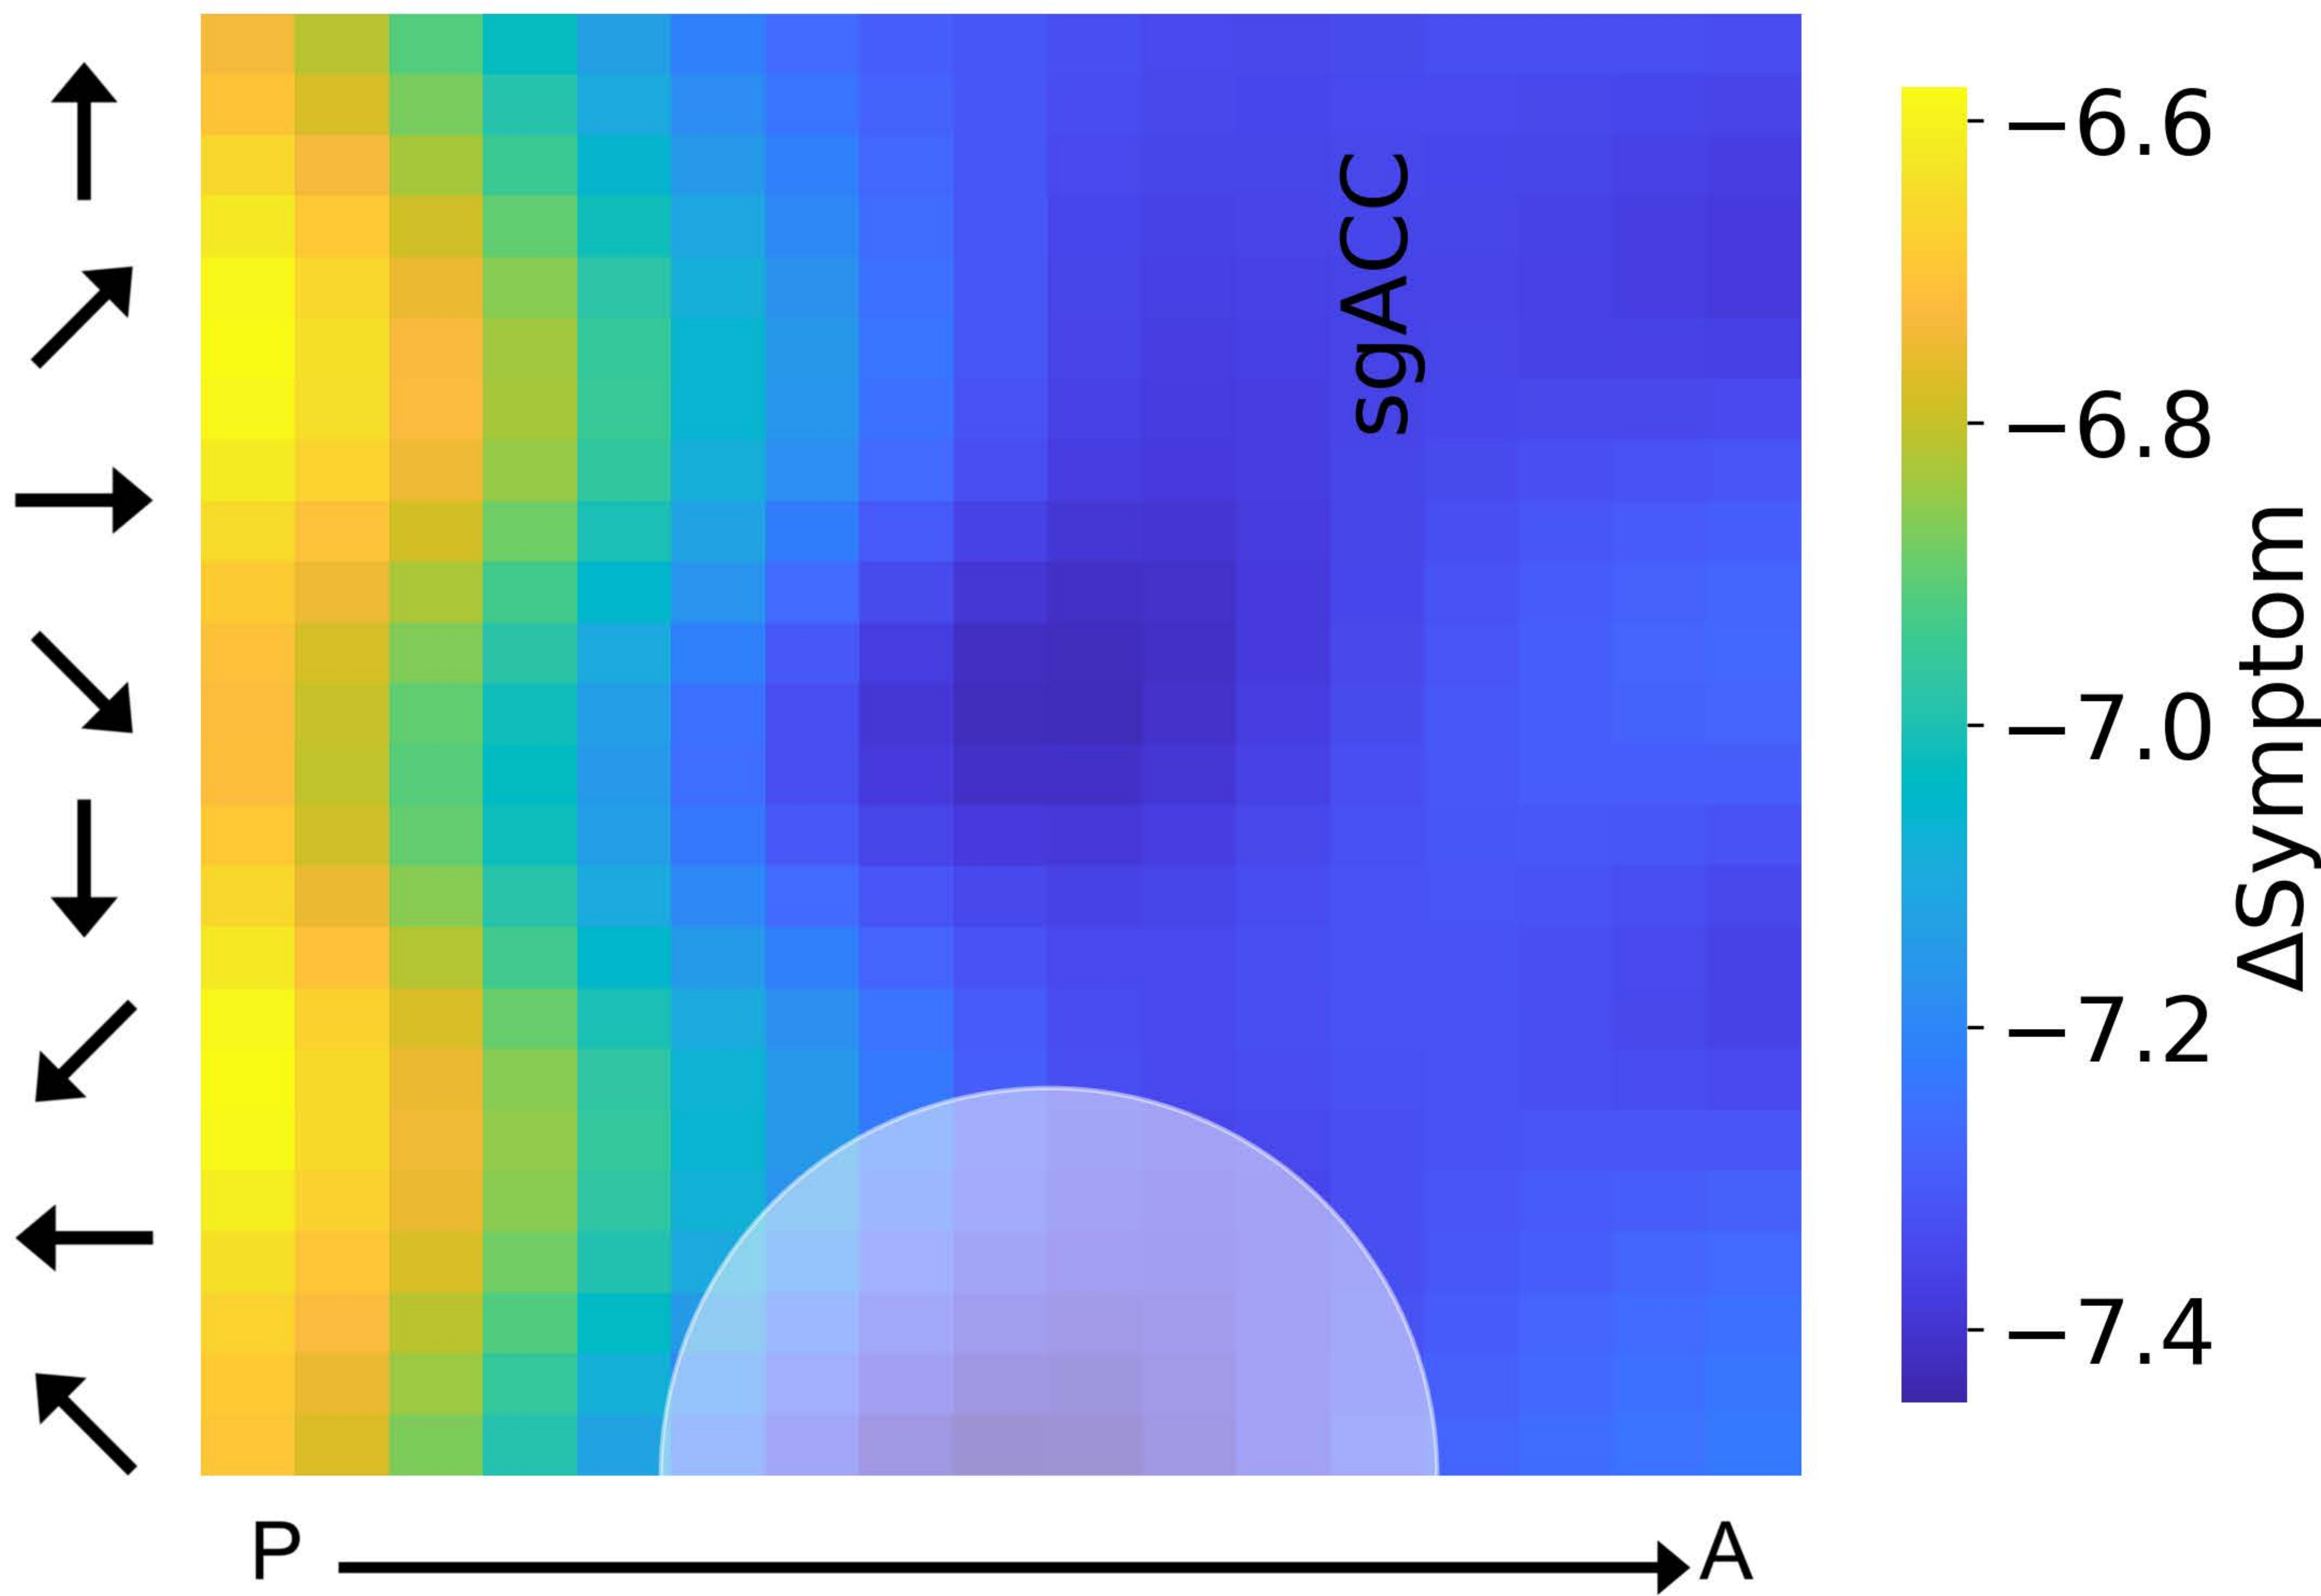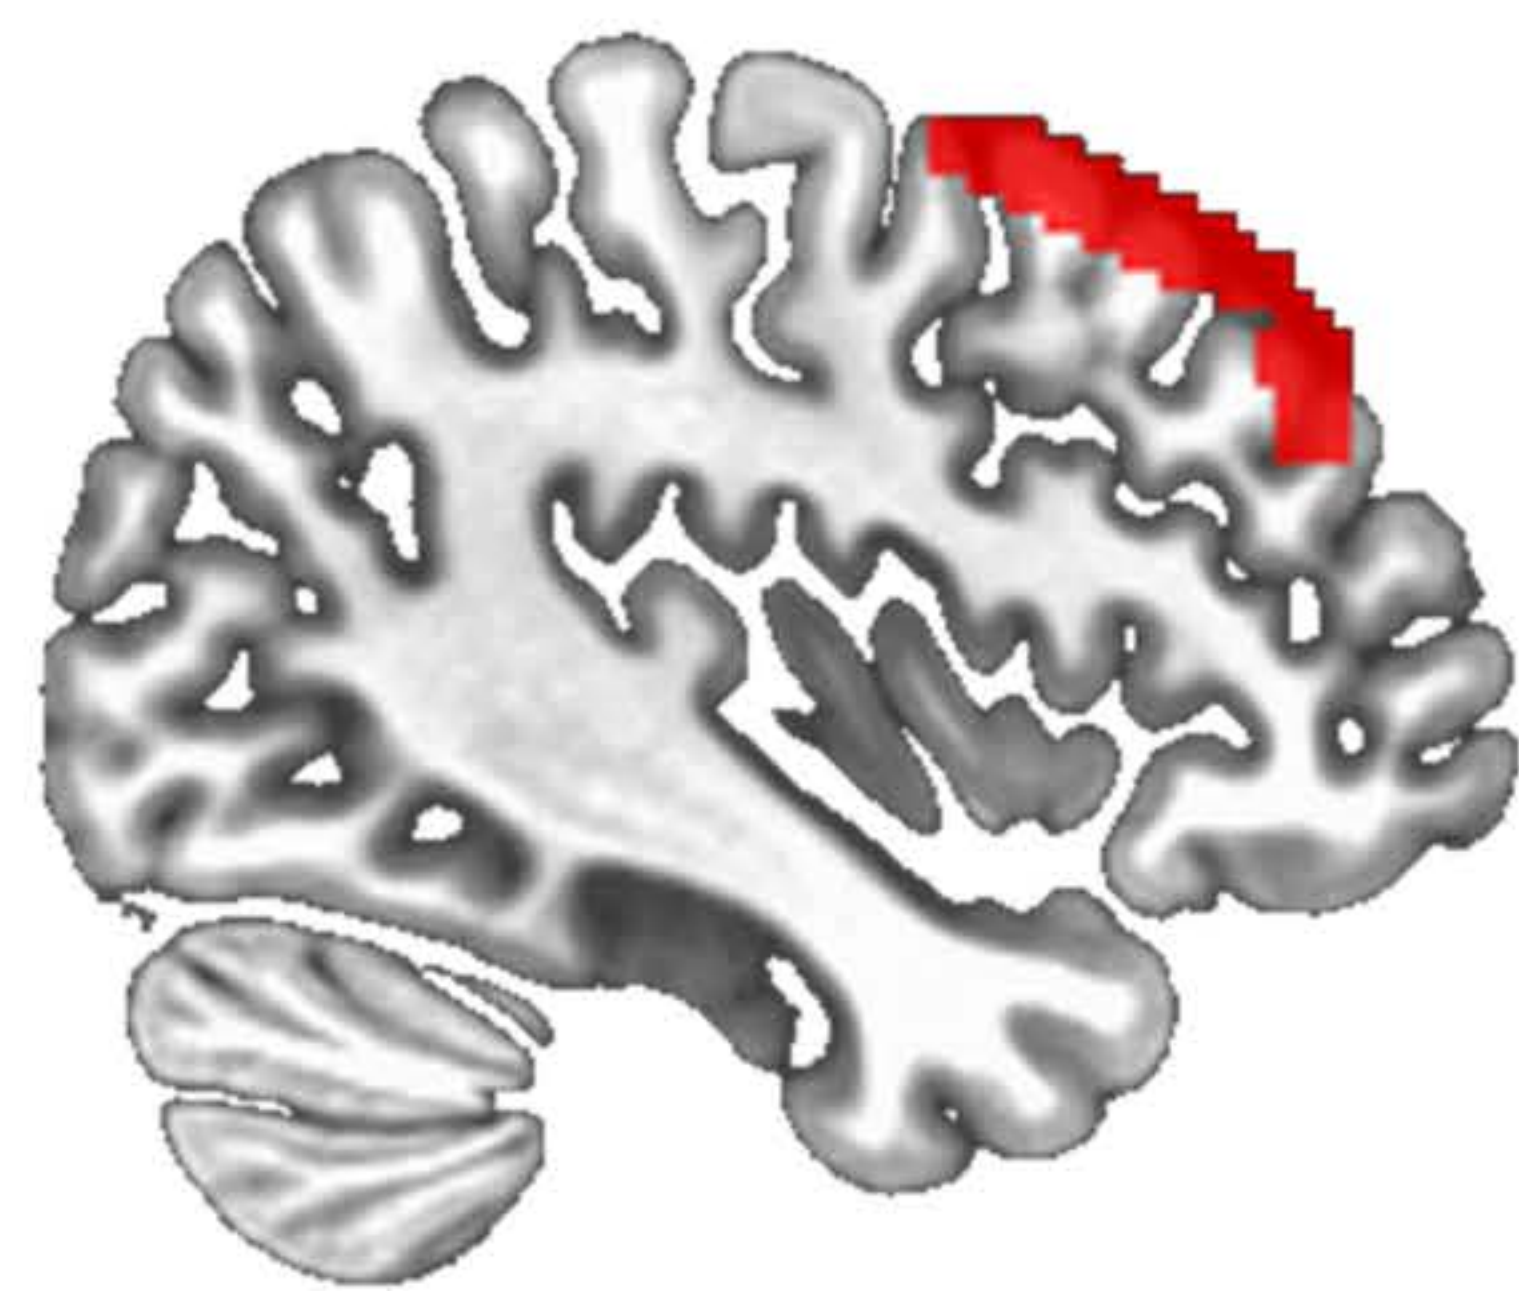



# INDARDU203PAW\_madrs\_left\_dlpfc

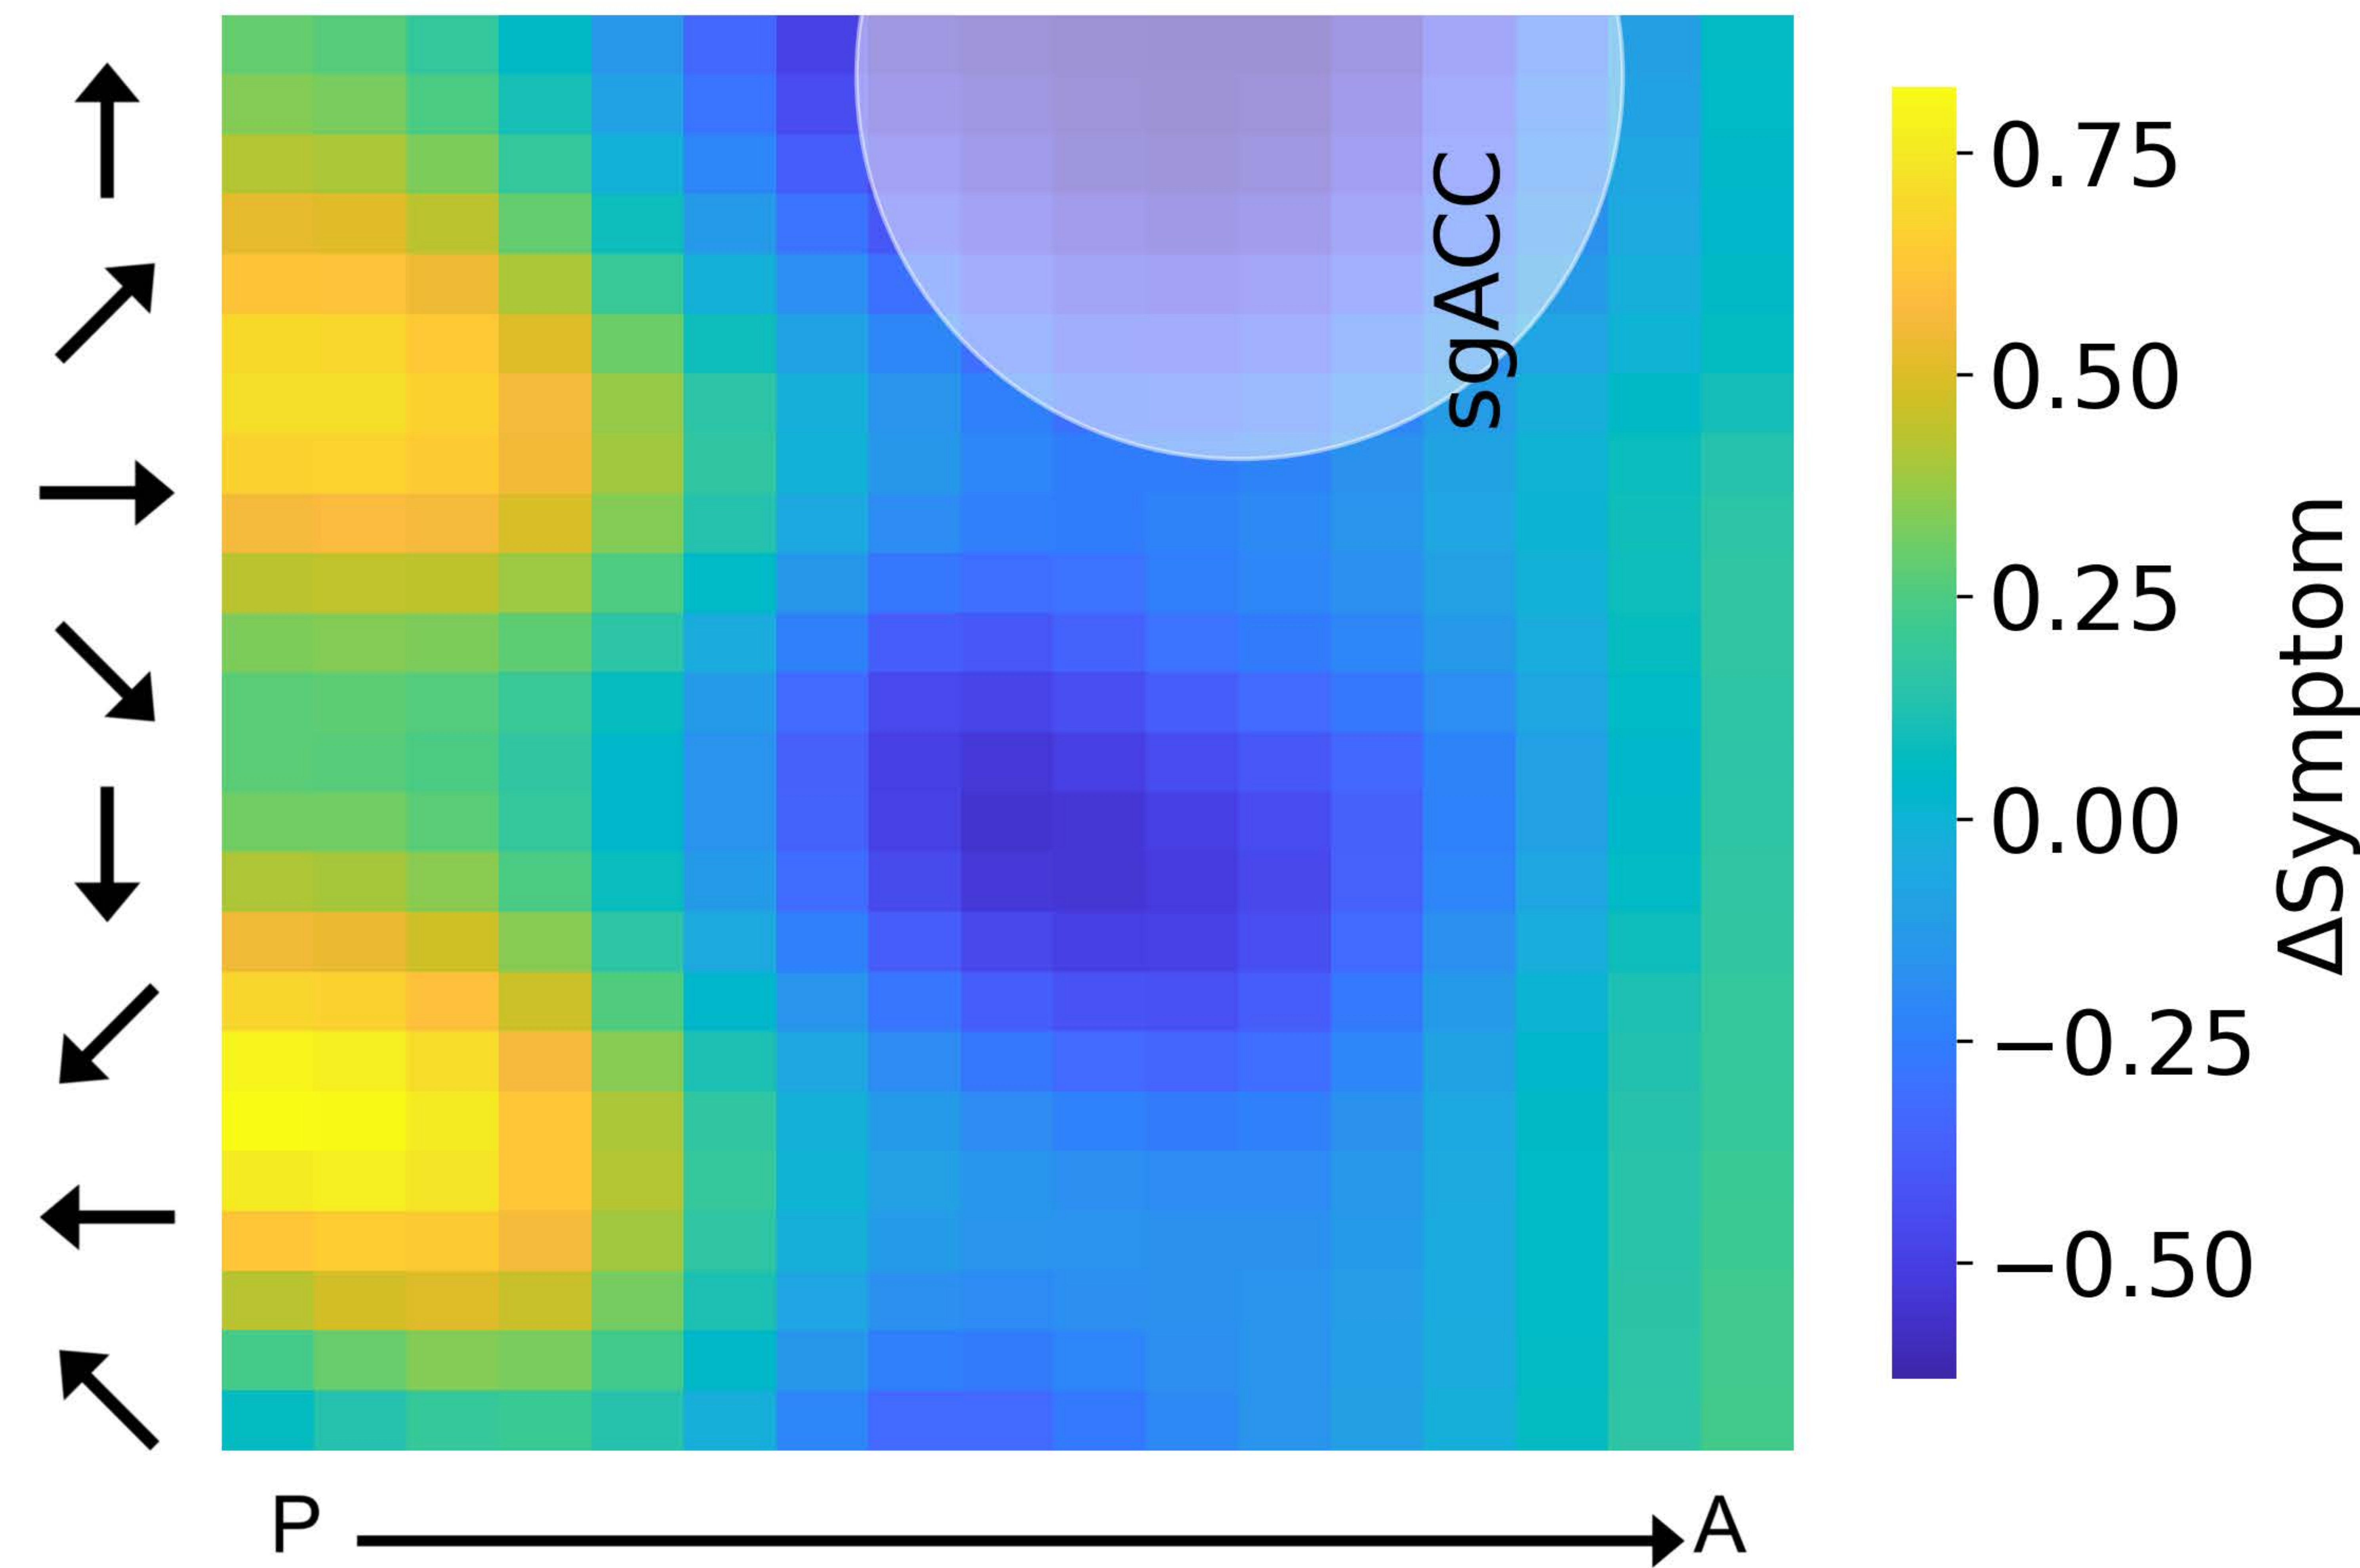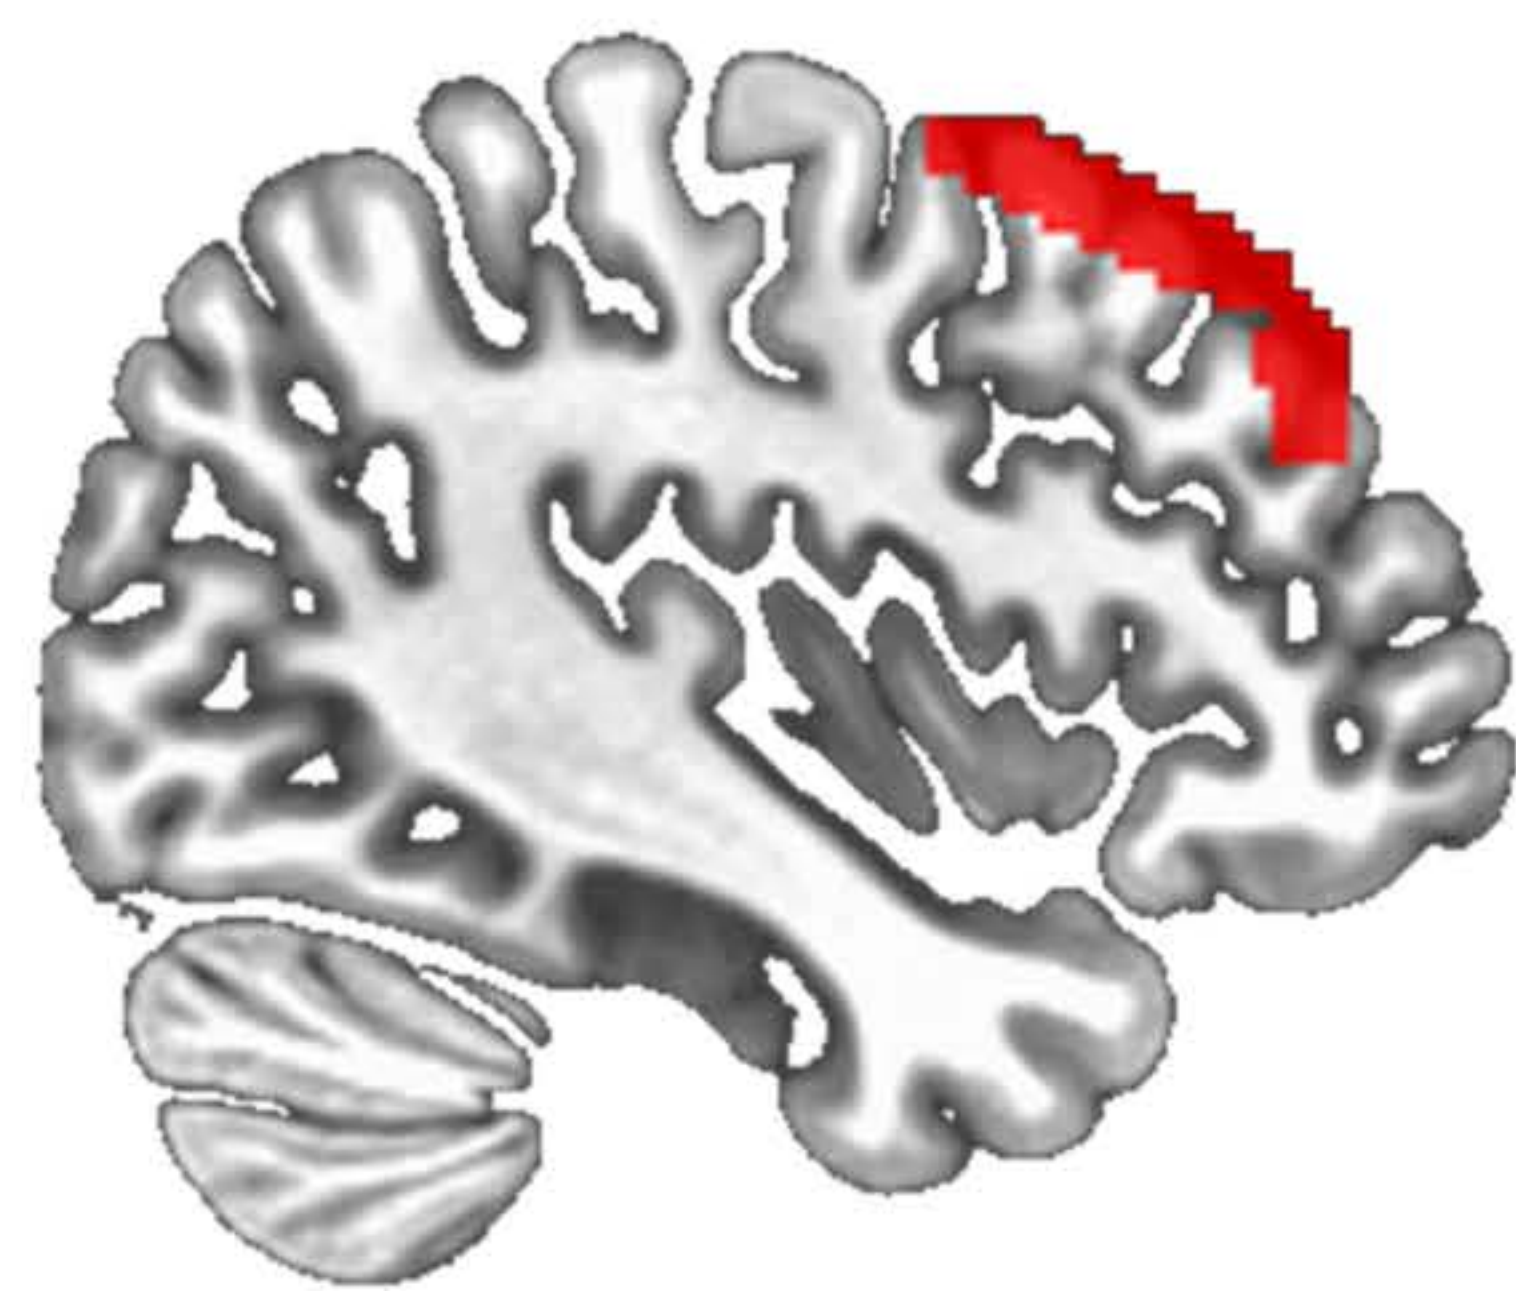



# INDARDU282NKX\_madrs\_left\_dlpfc

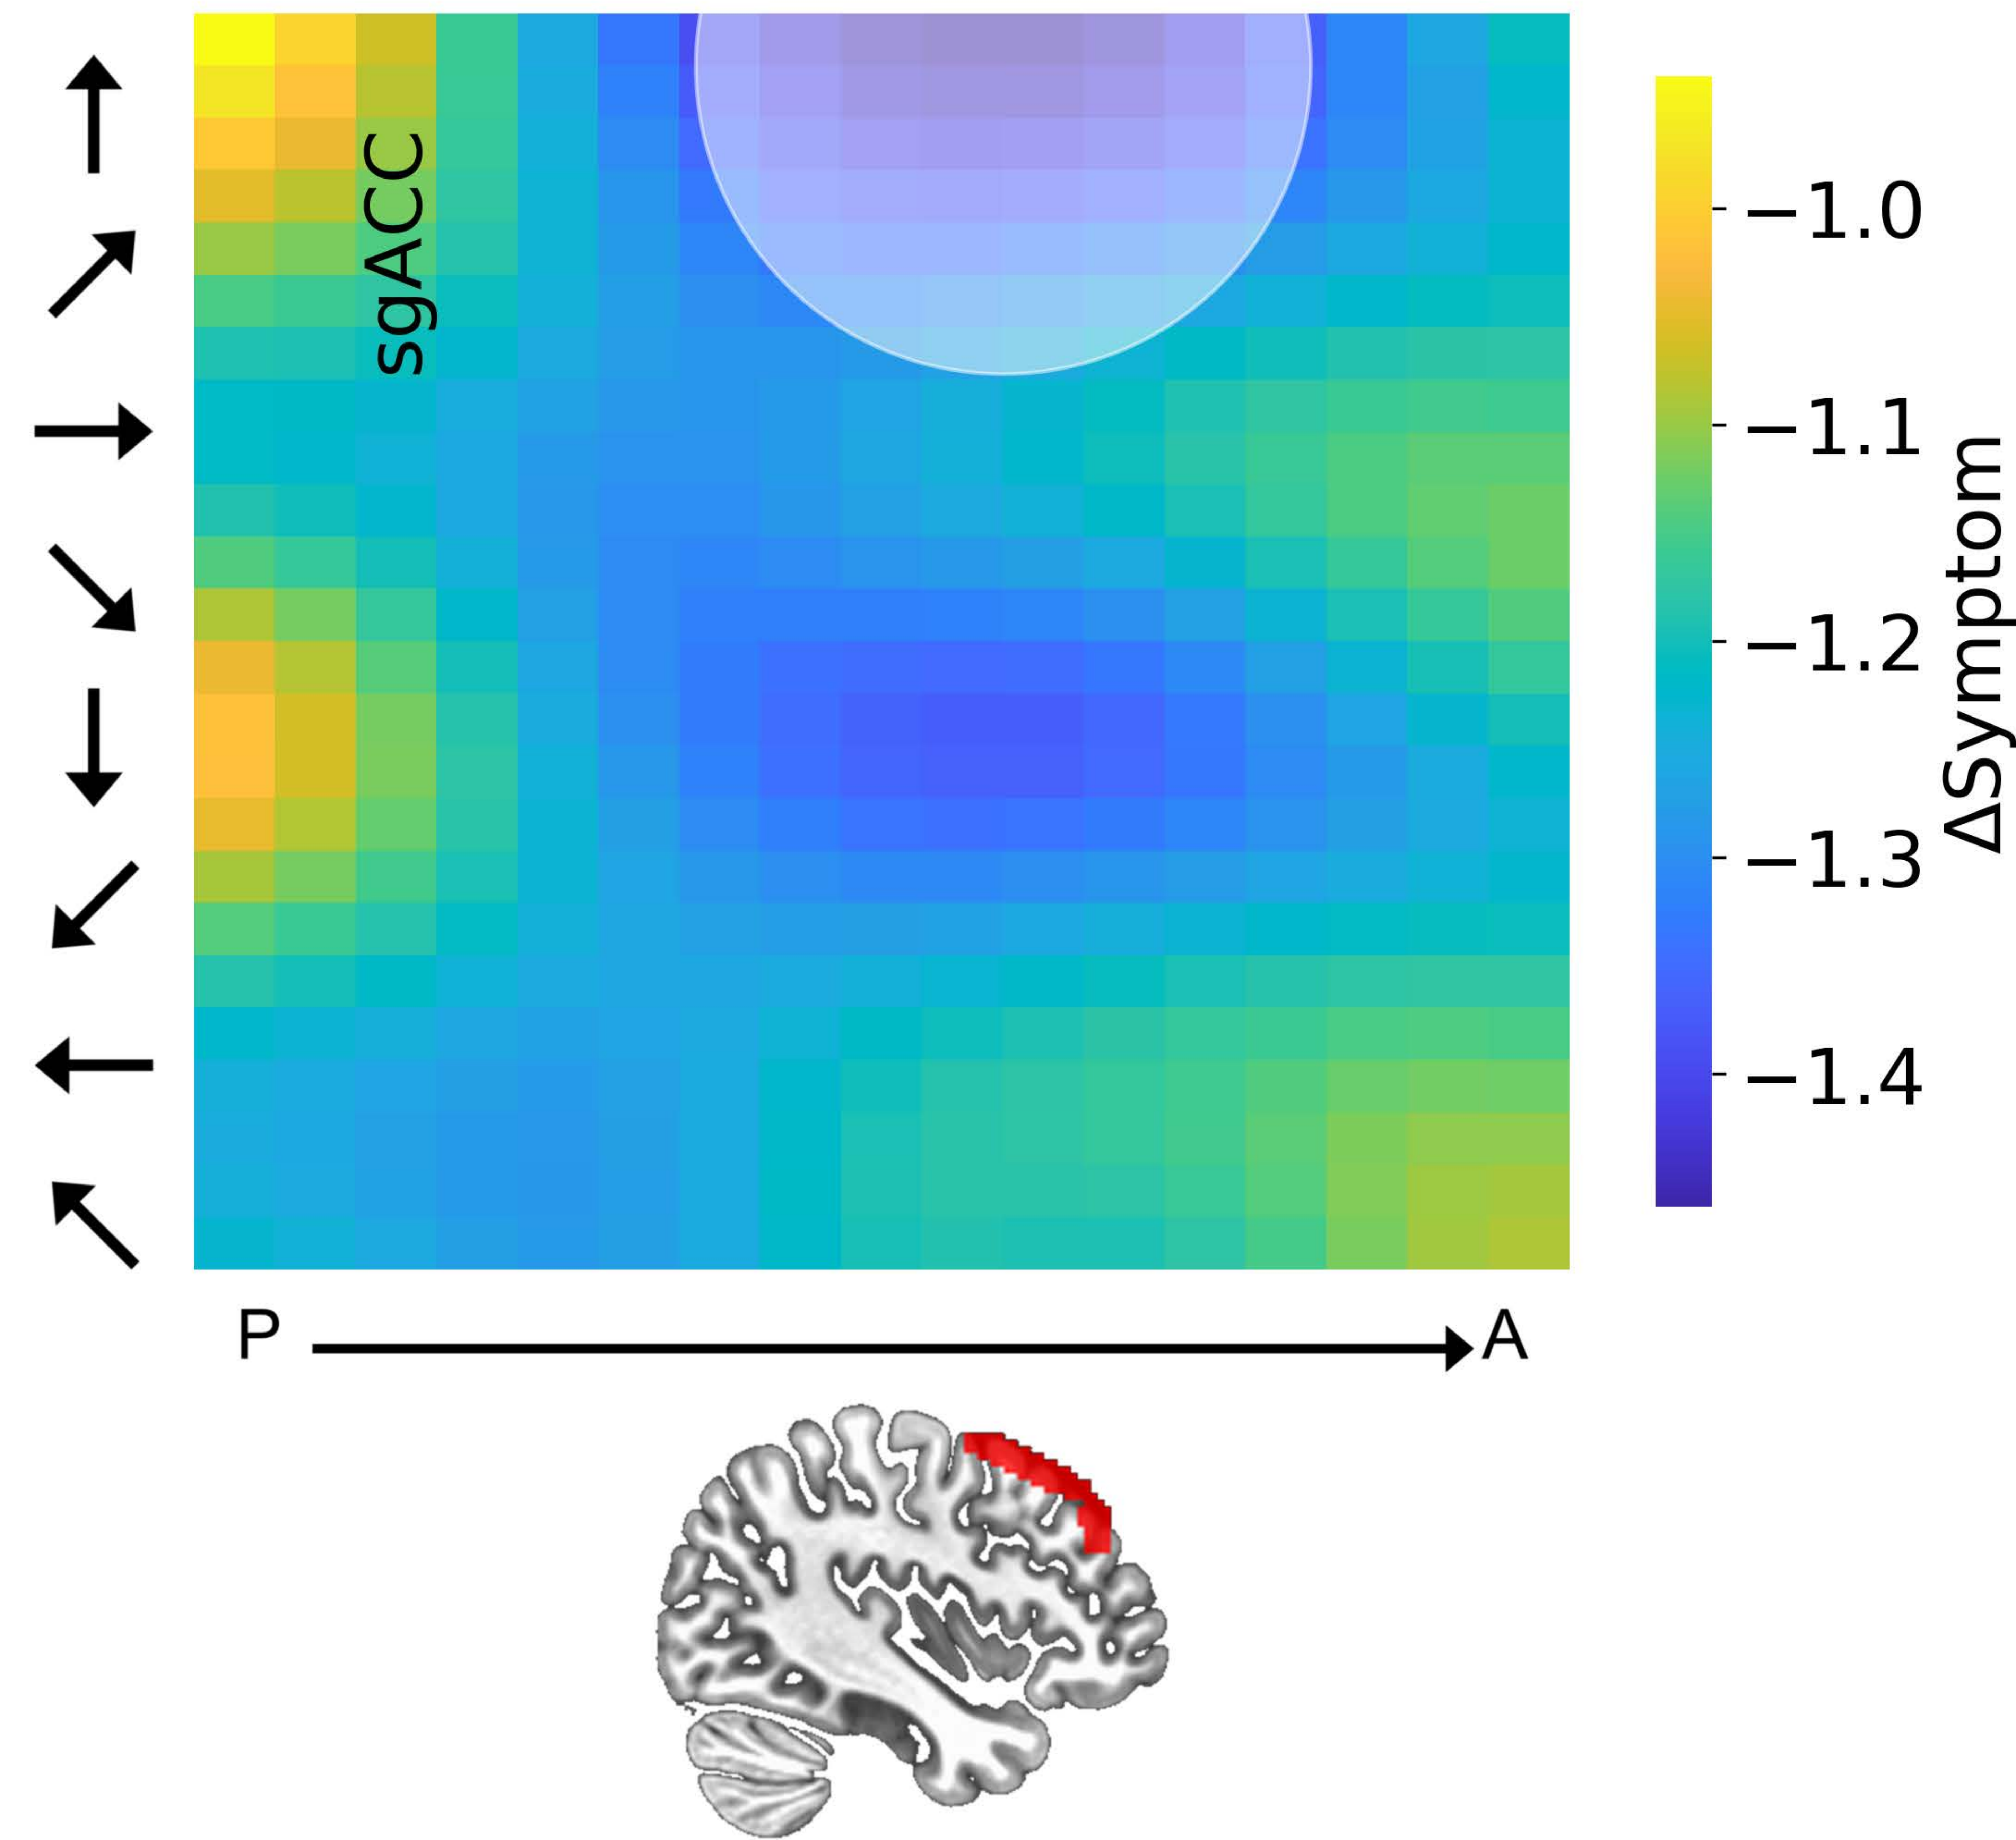



# NDARDV056JZW\_madrs\_left\_dlpfc

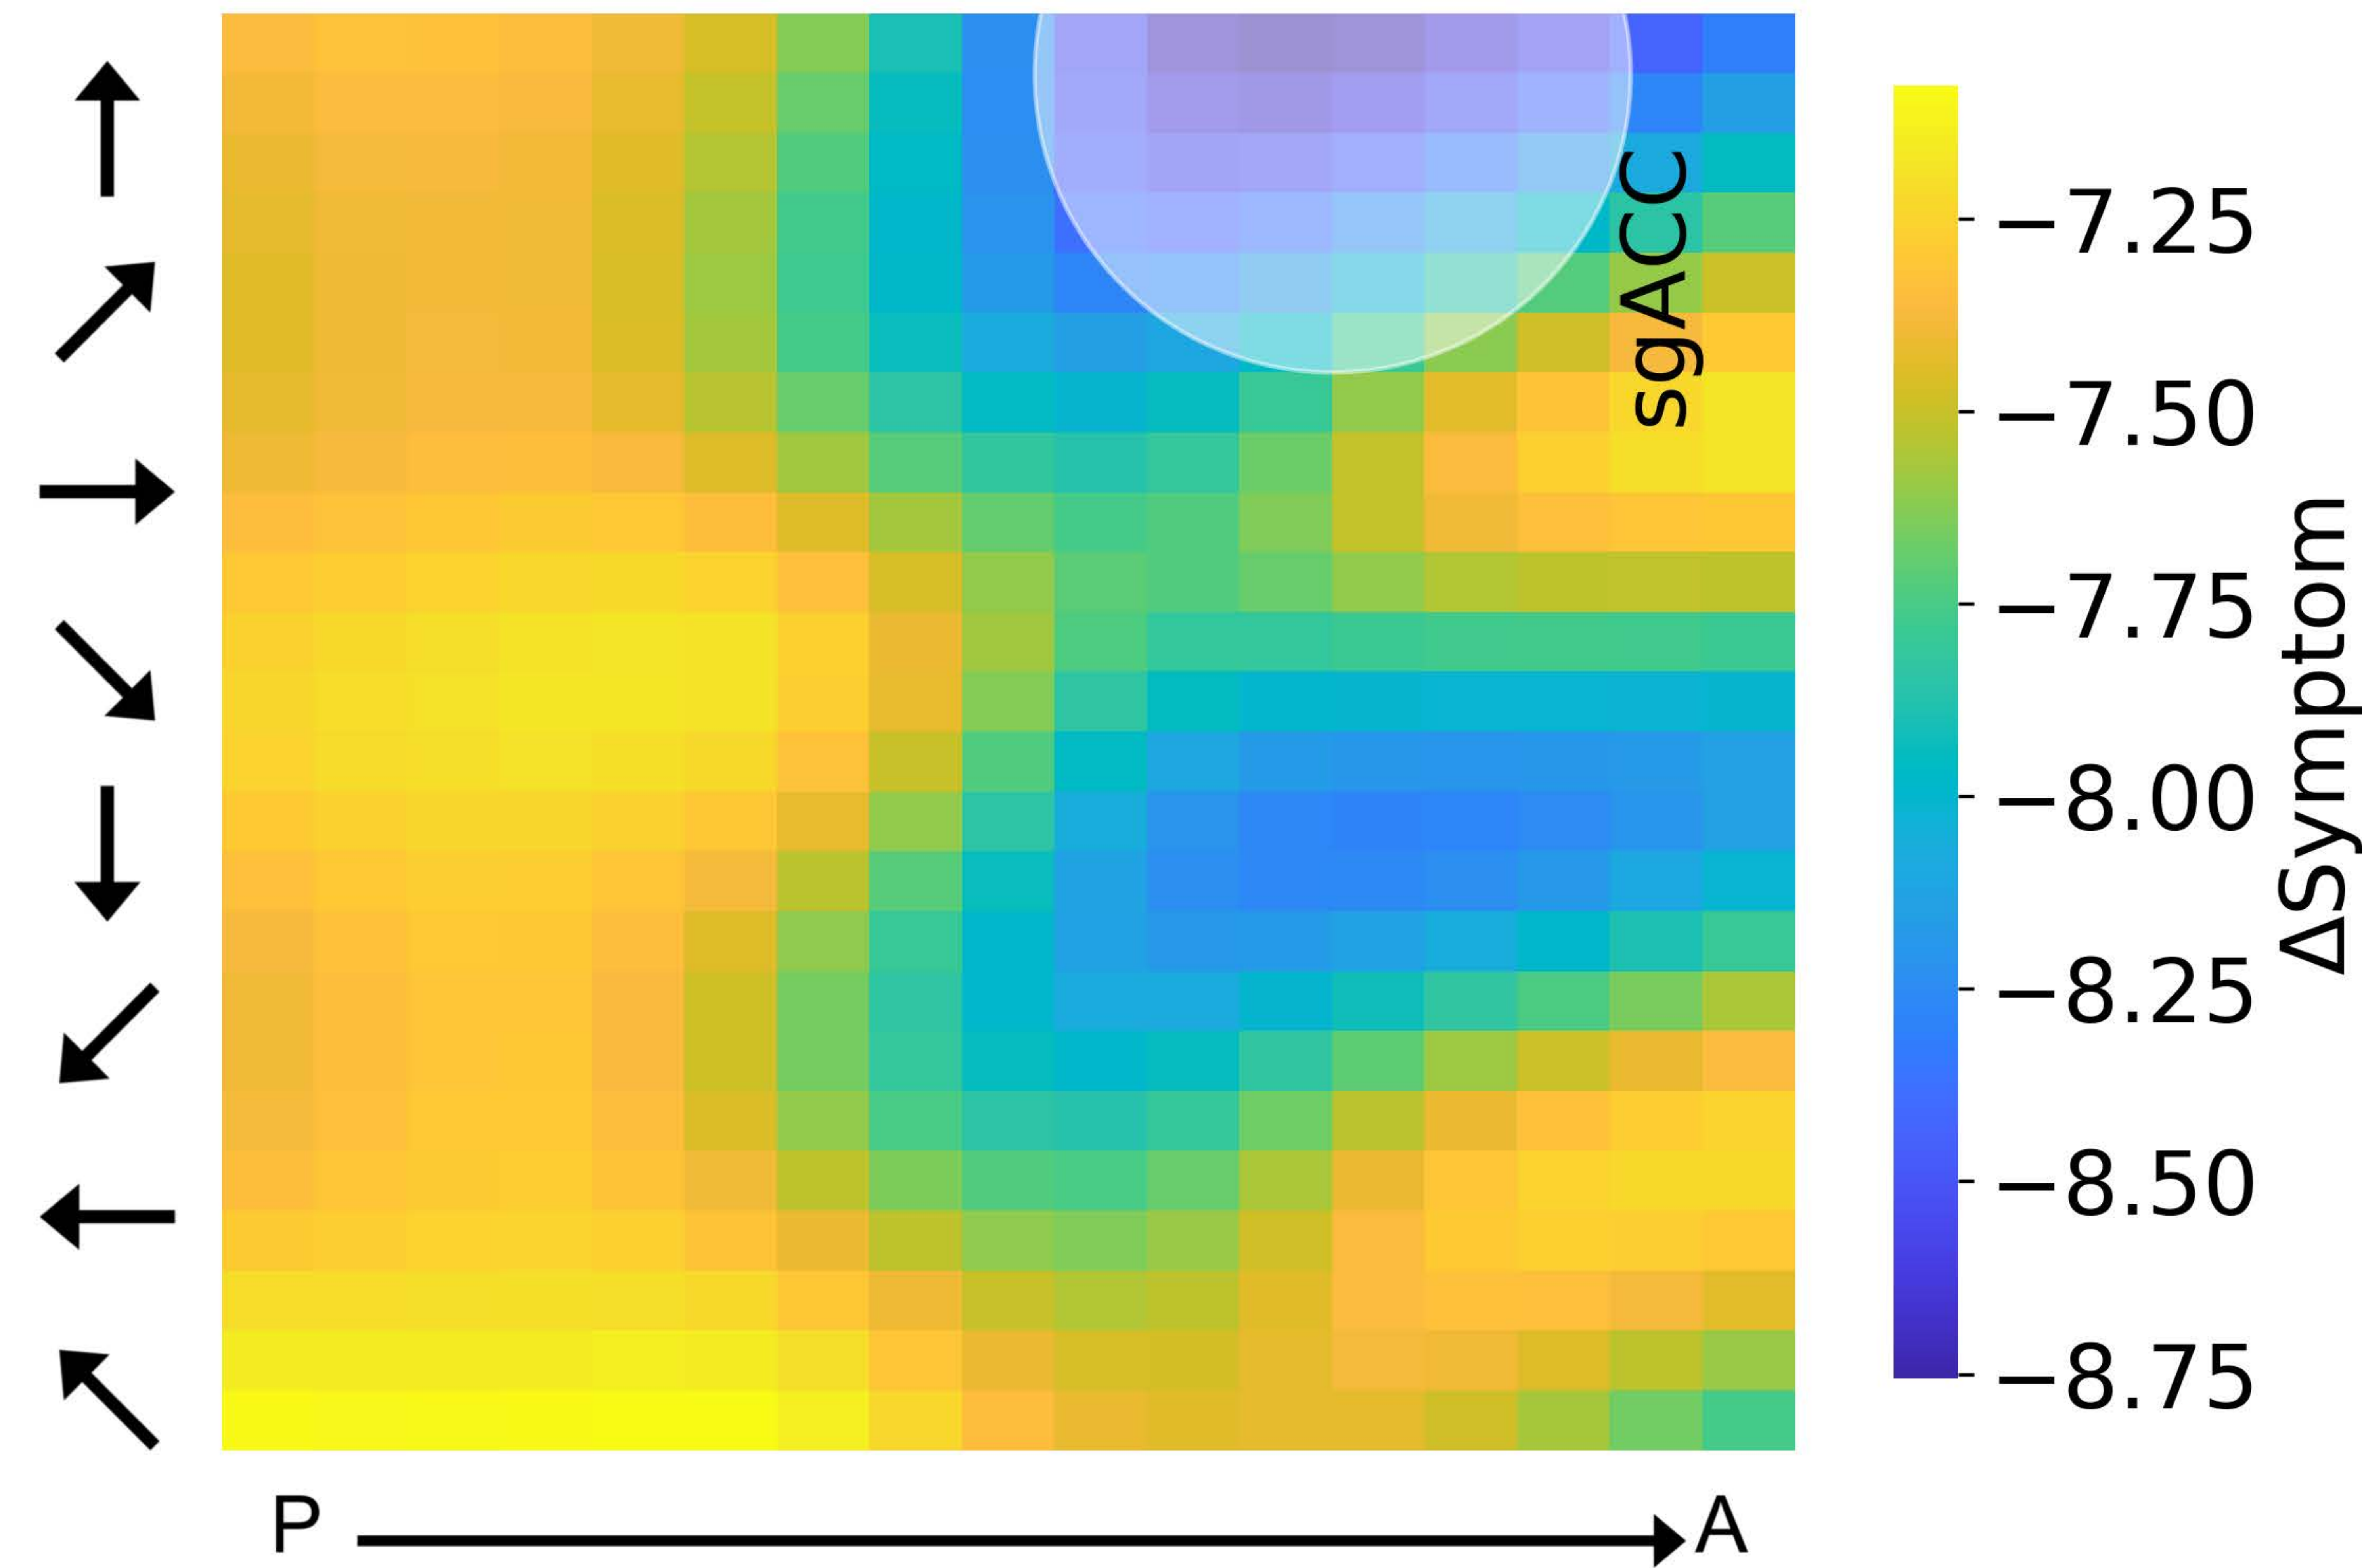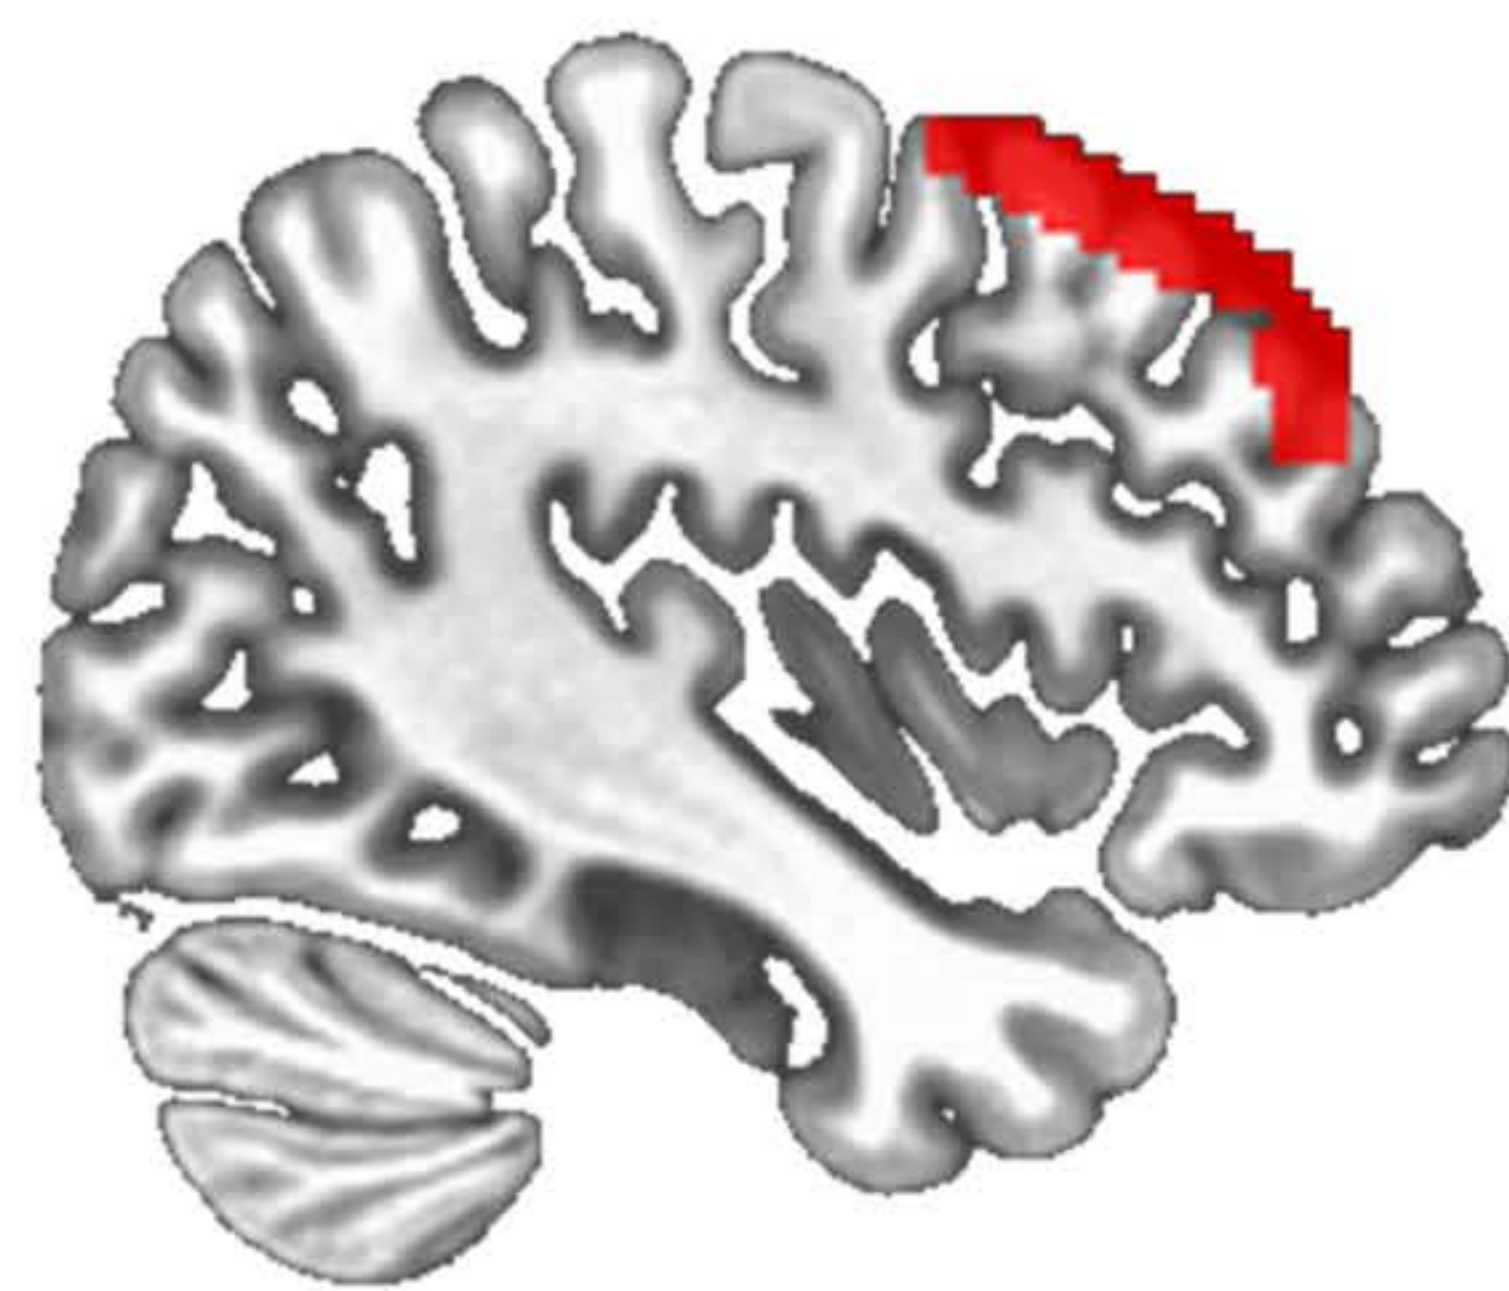



# NDAREB933ZEU\_madr\_left\_dlpfc

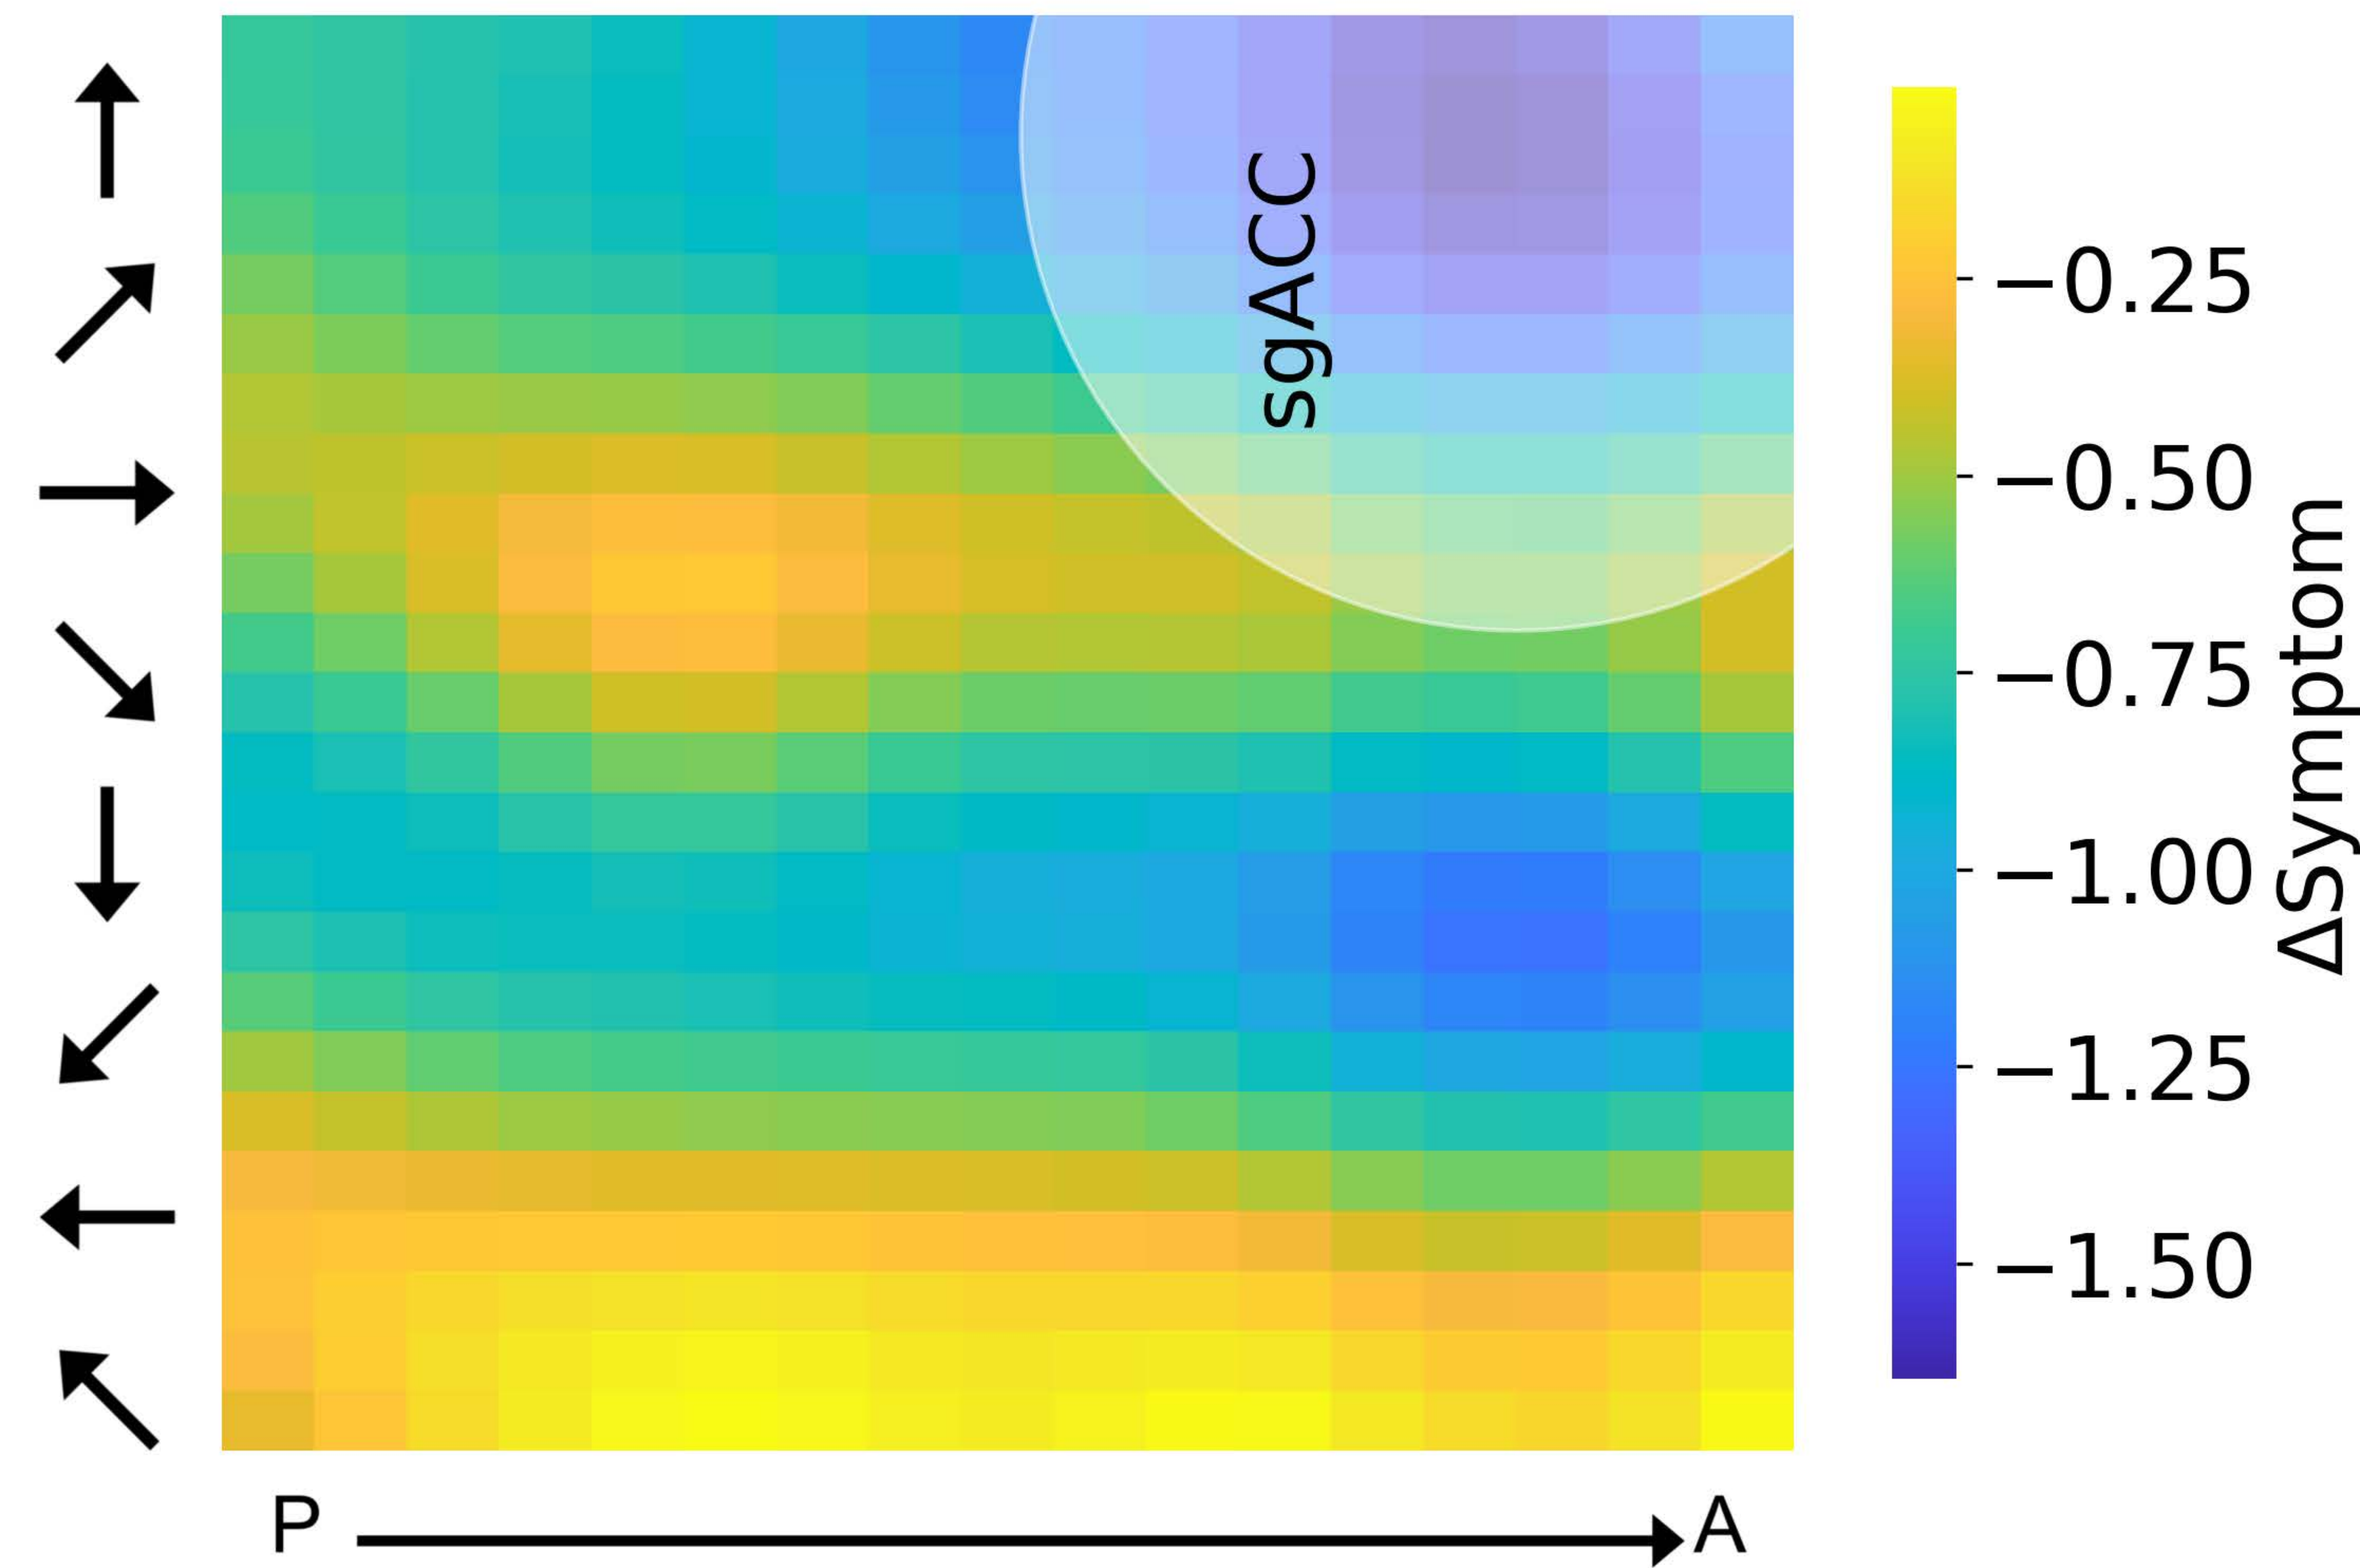



# NDAREU727GCY\_madrs\_left\_dlpfc

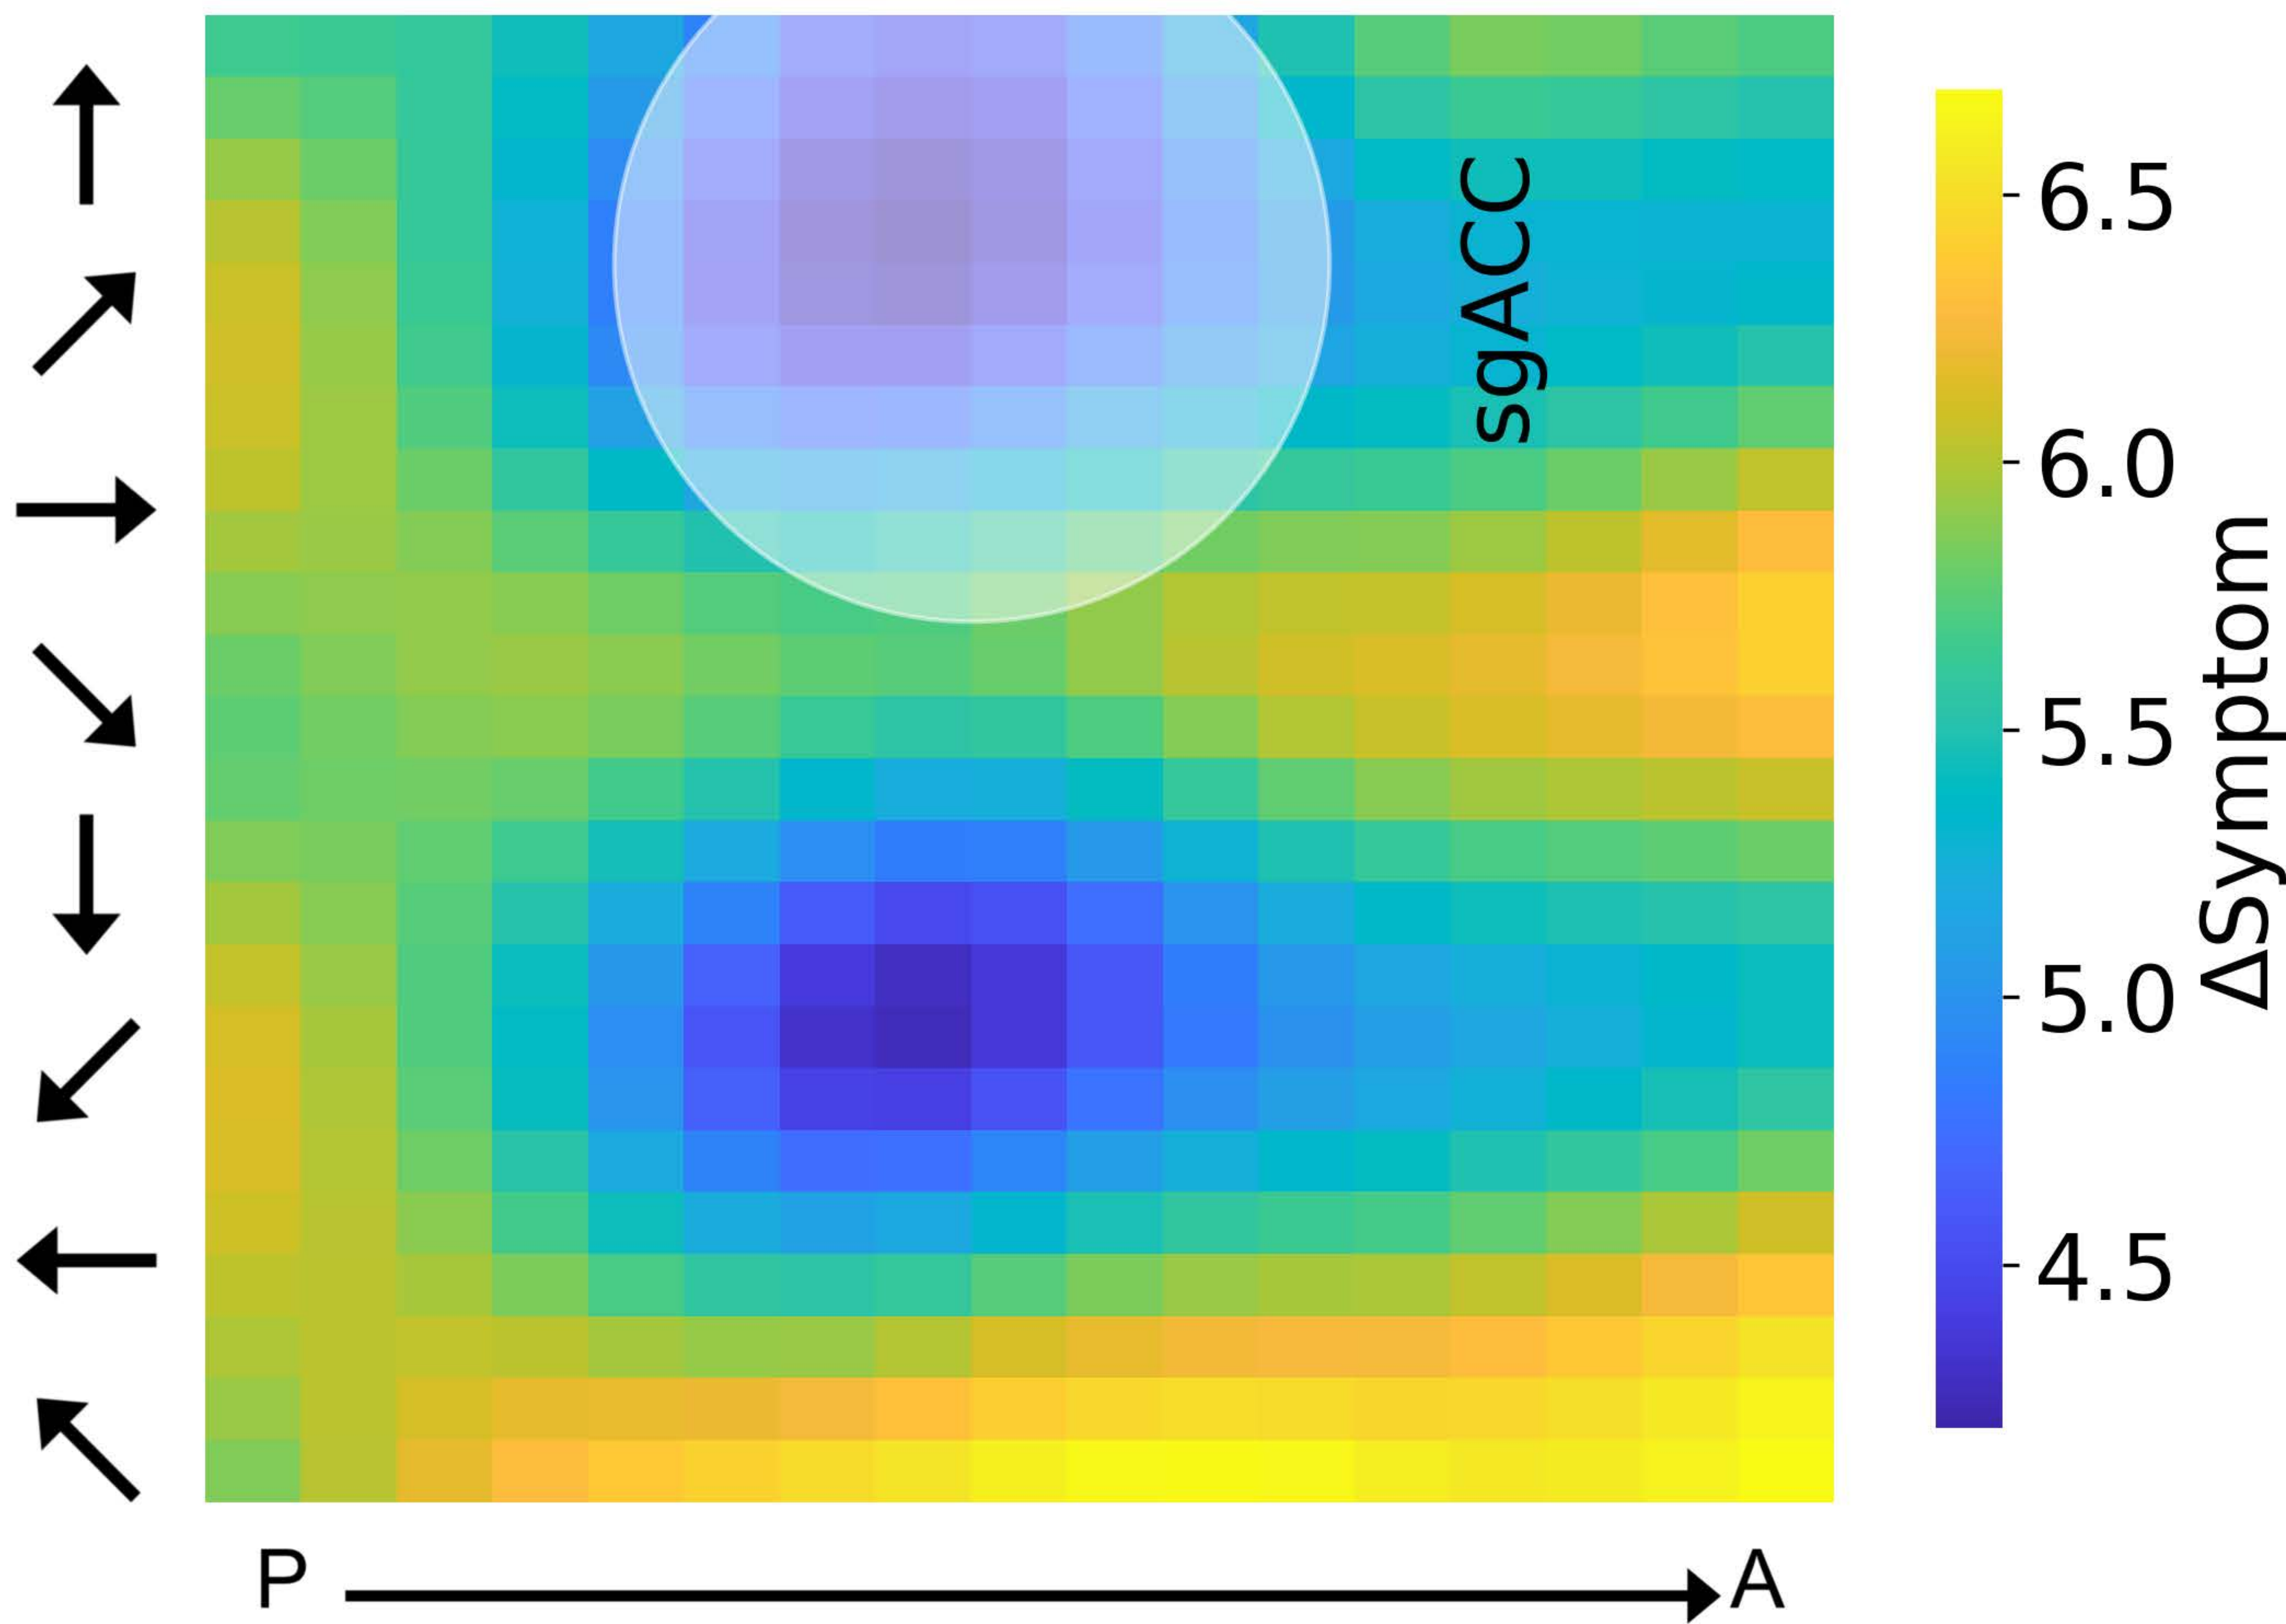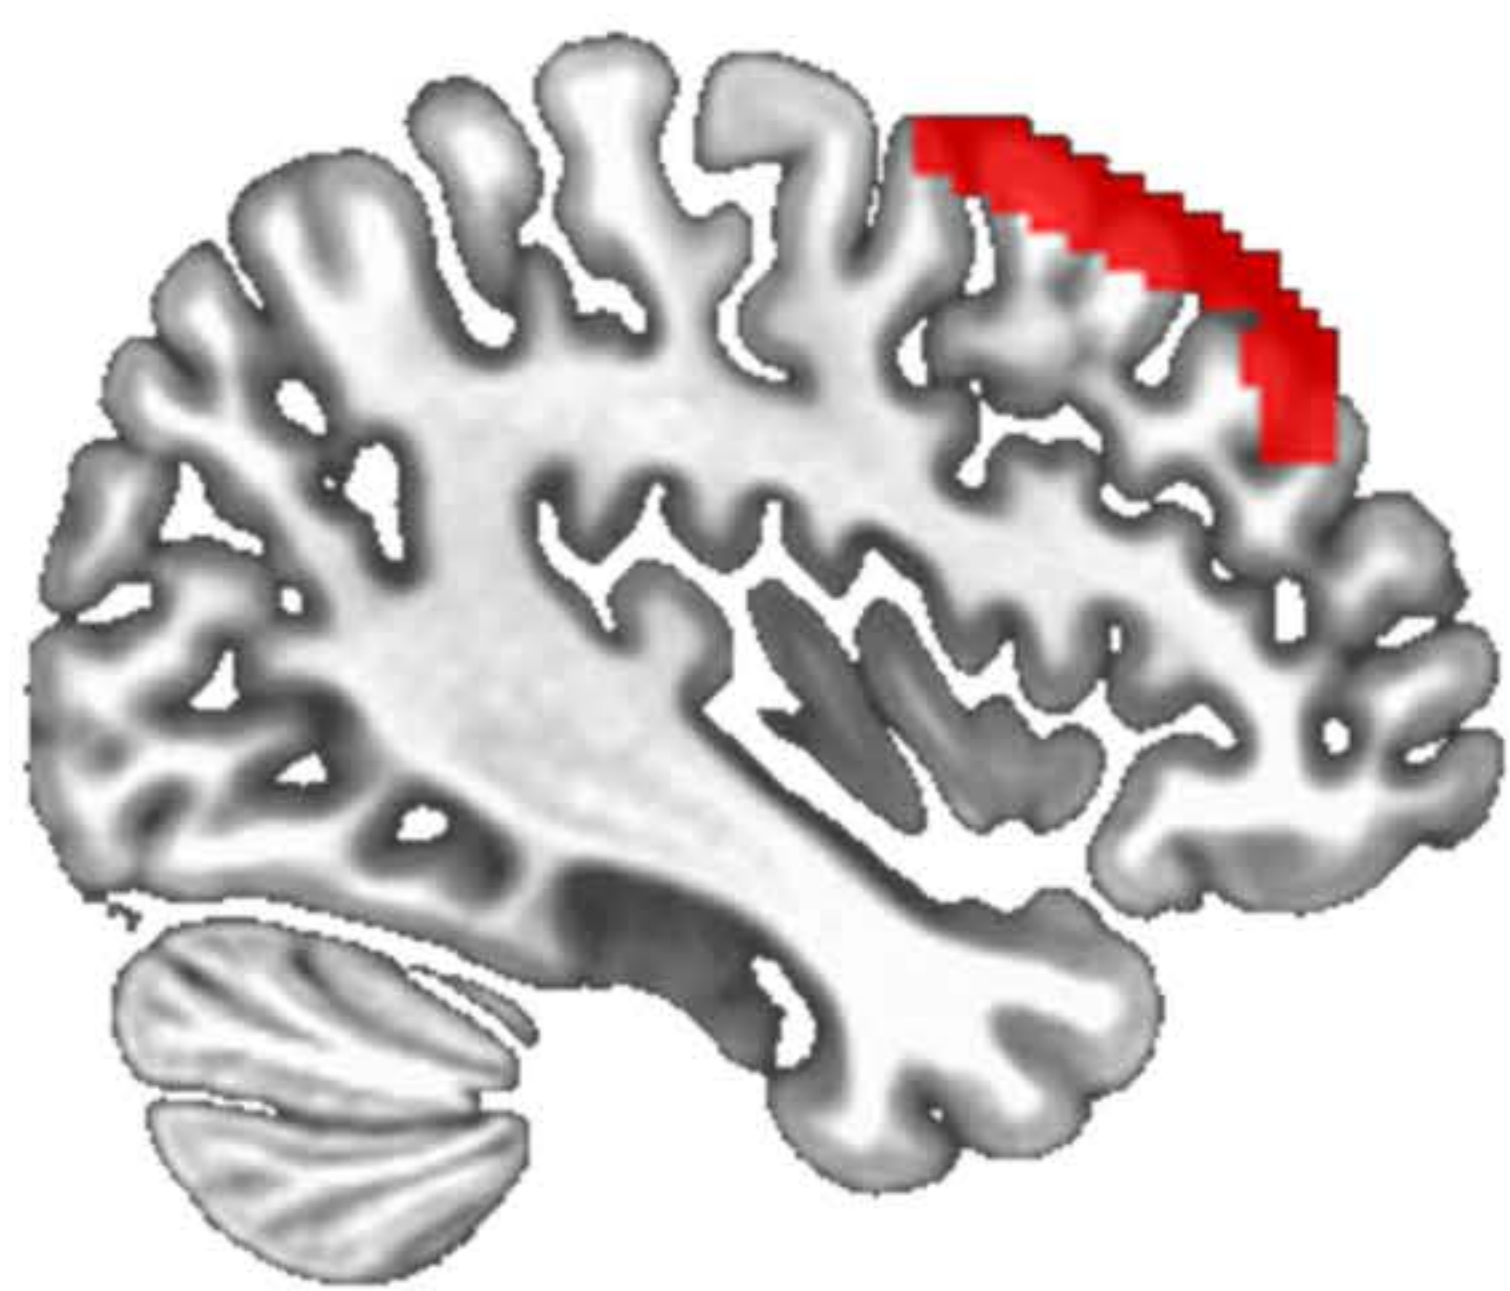



# INDAREW484UCJ\_madrs\_left\_dlpfc

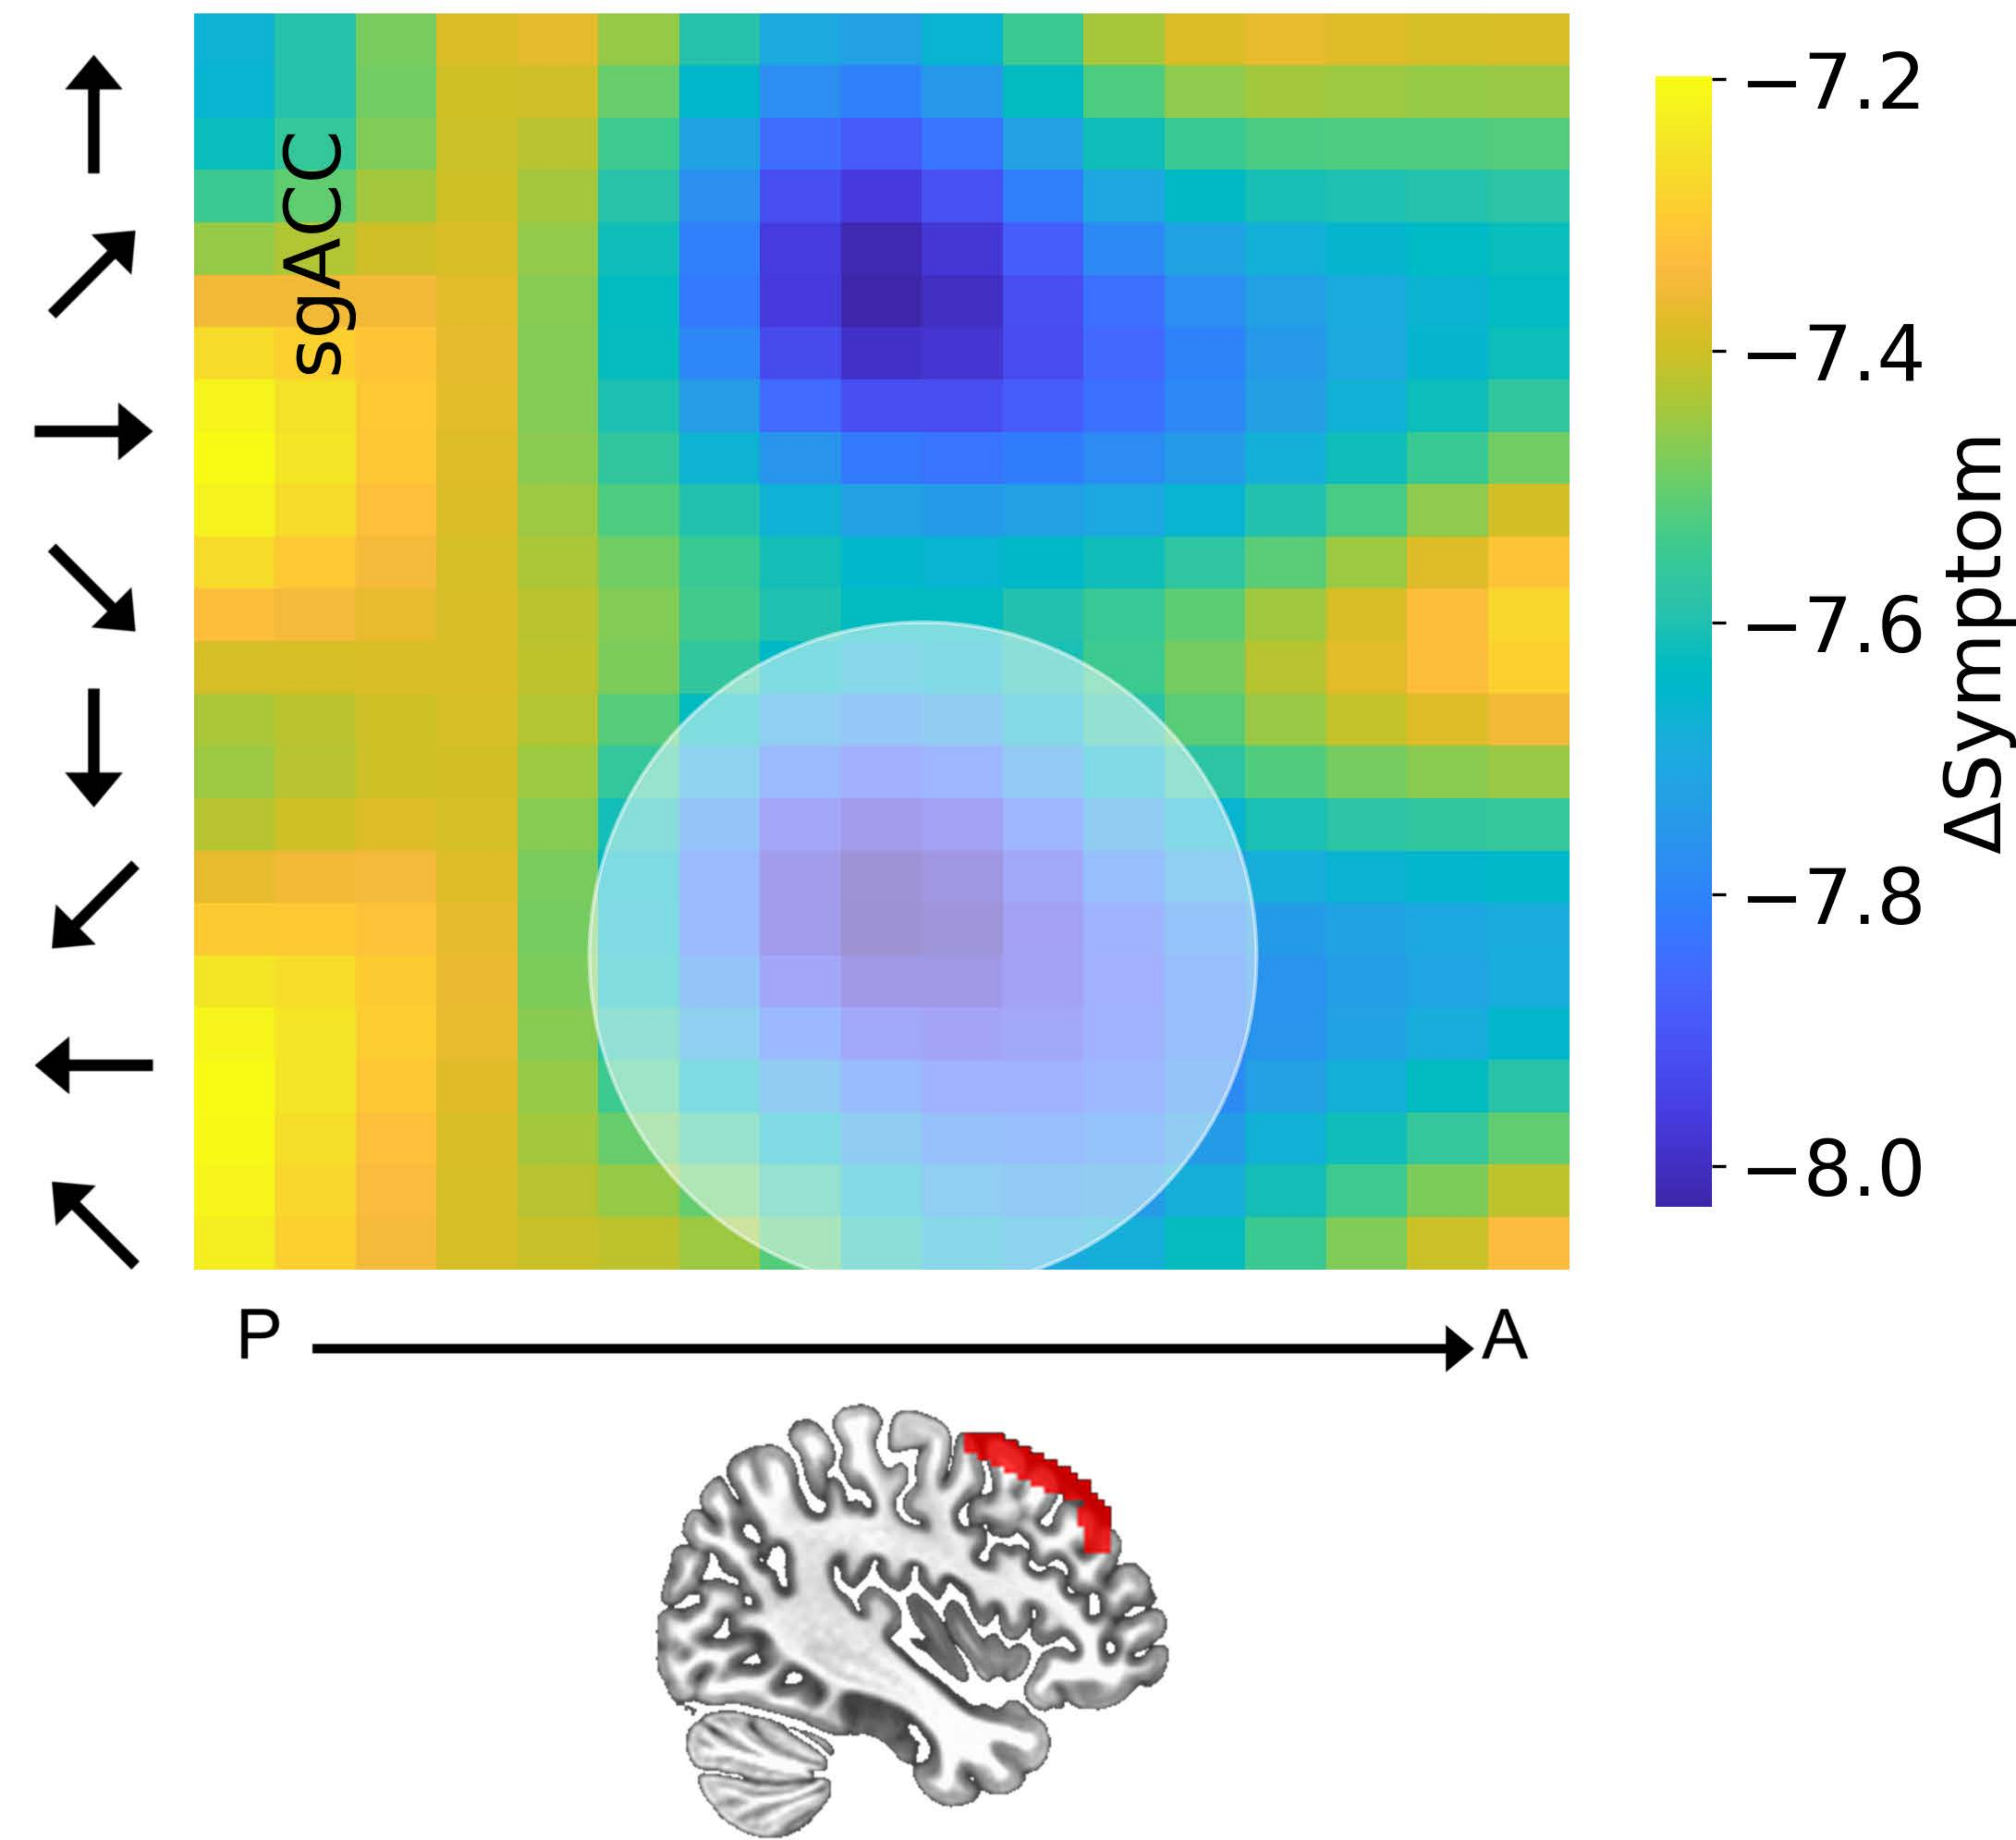



# NDAREZ915JK5\_madrs\_left\_dlpfc

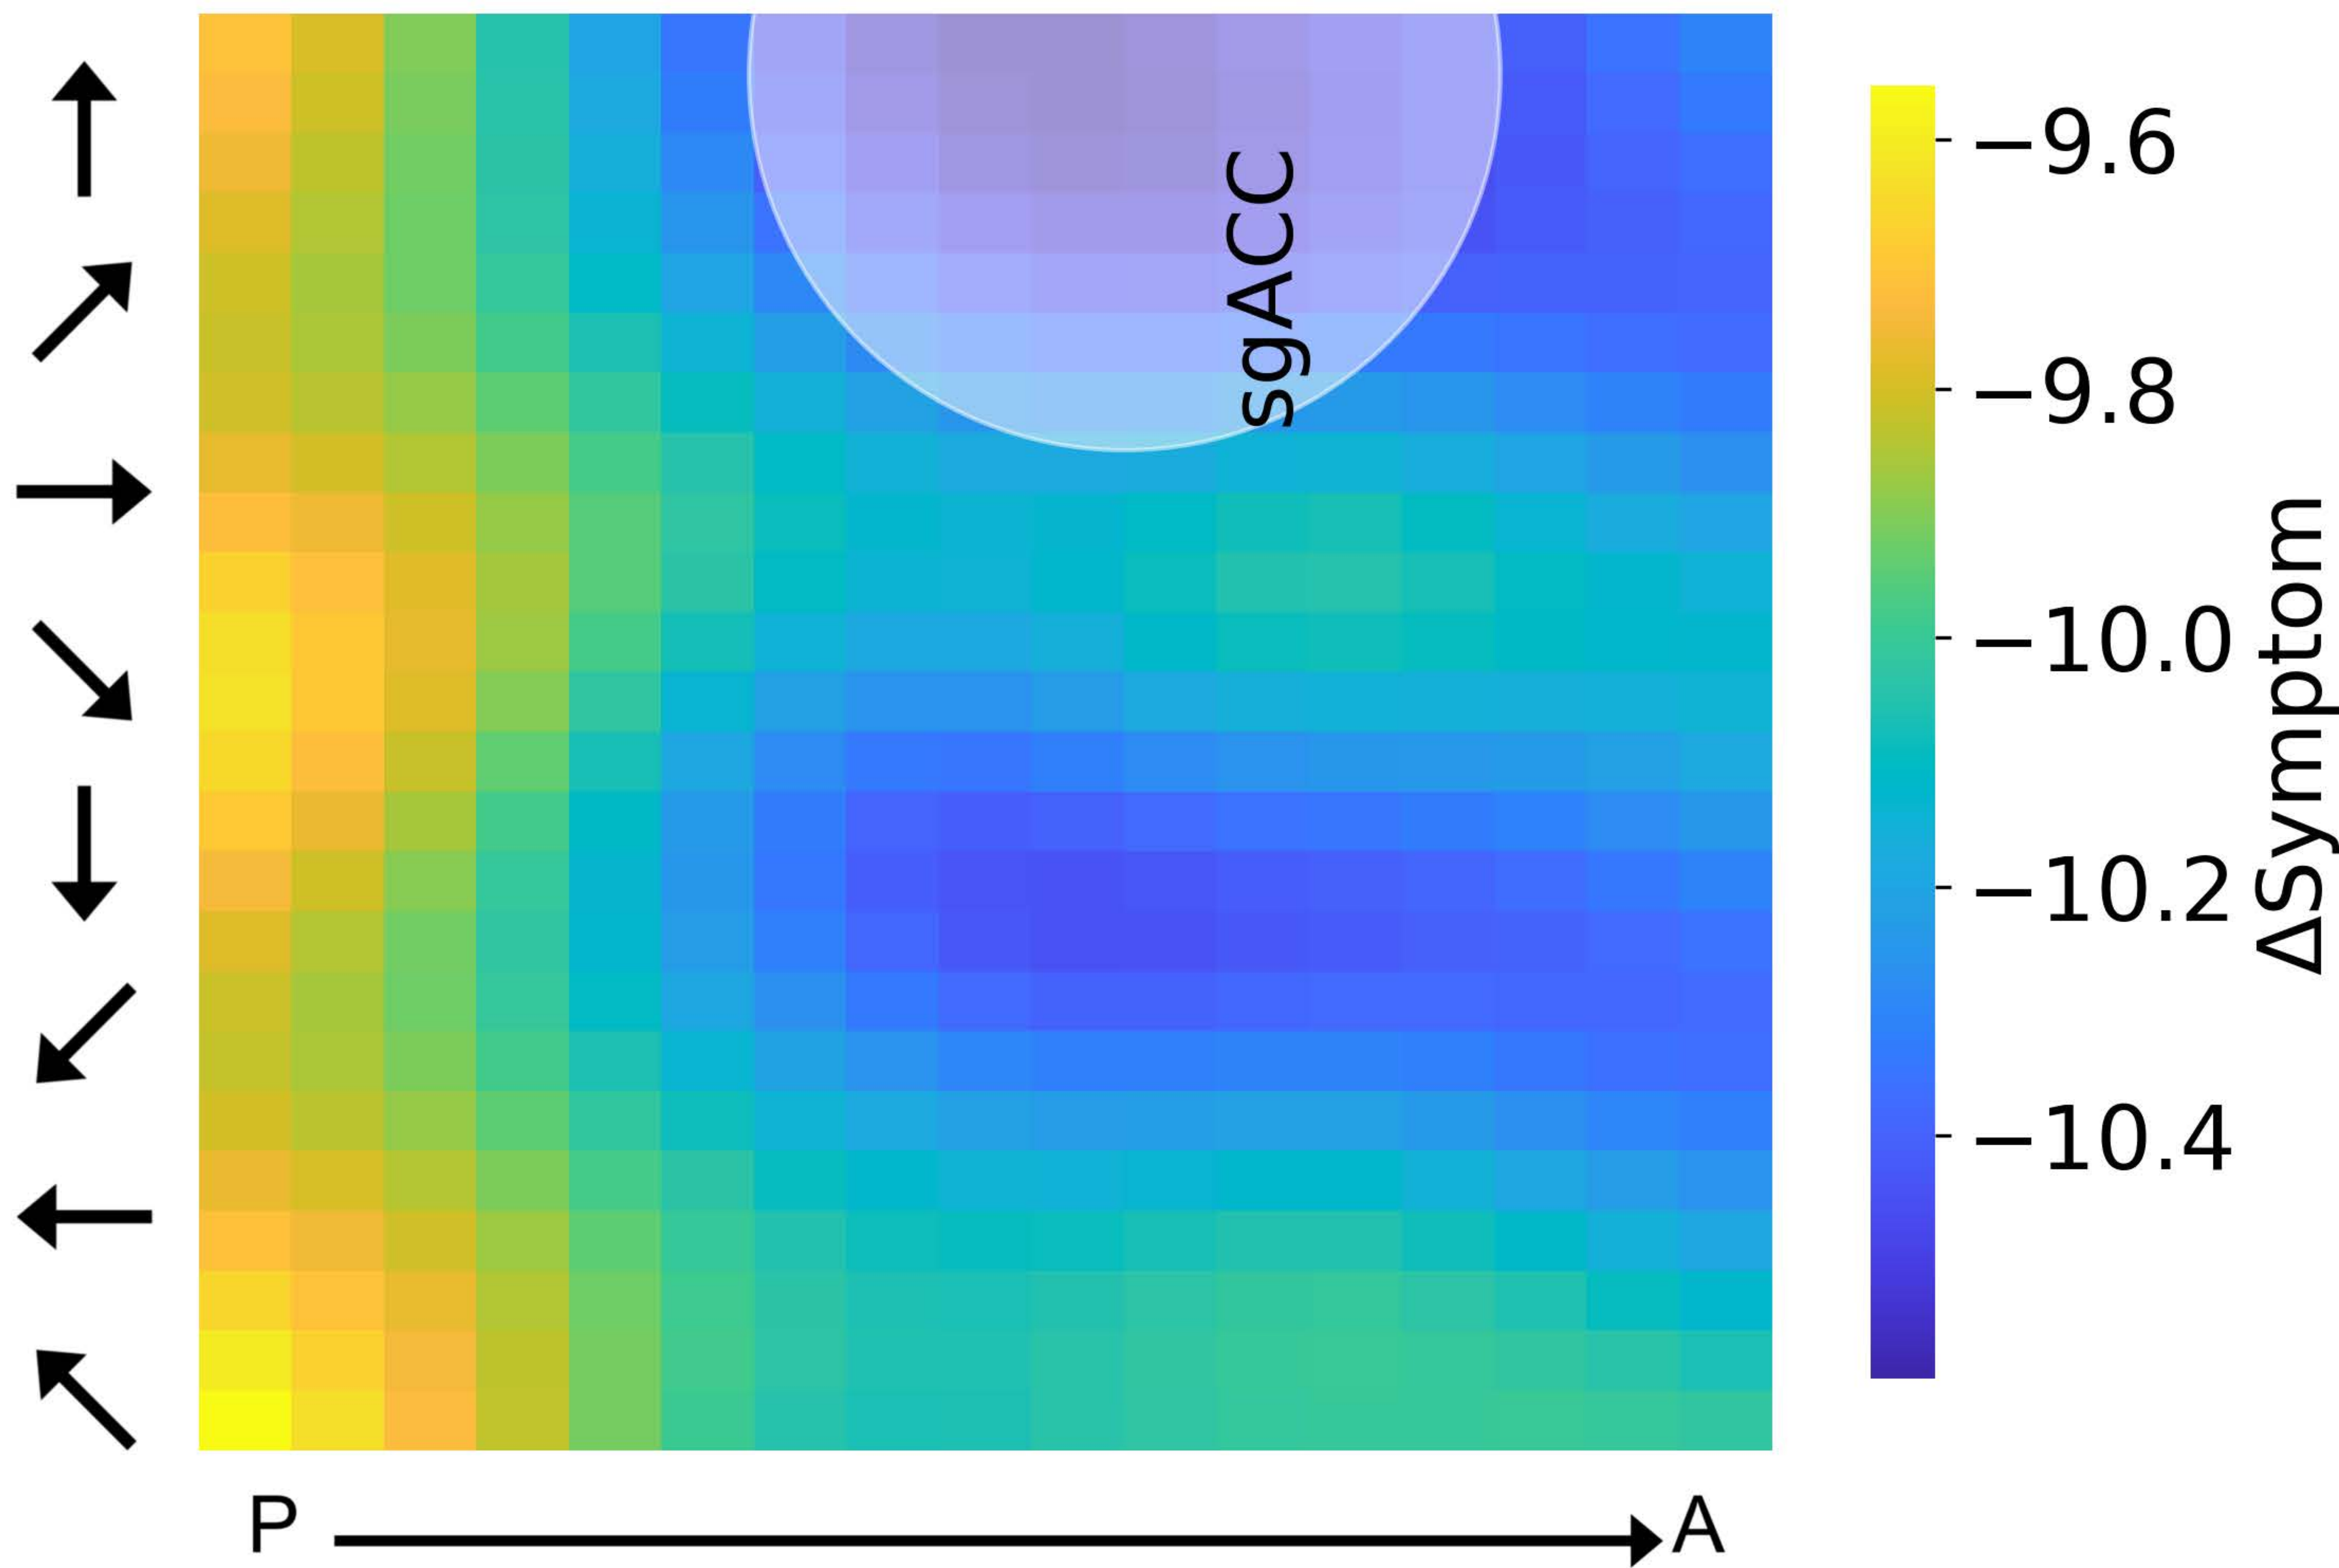



# NDARFH525MFZ\_madr\_left\_dlpfc

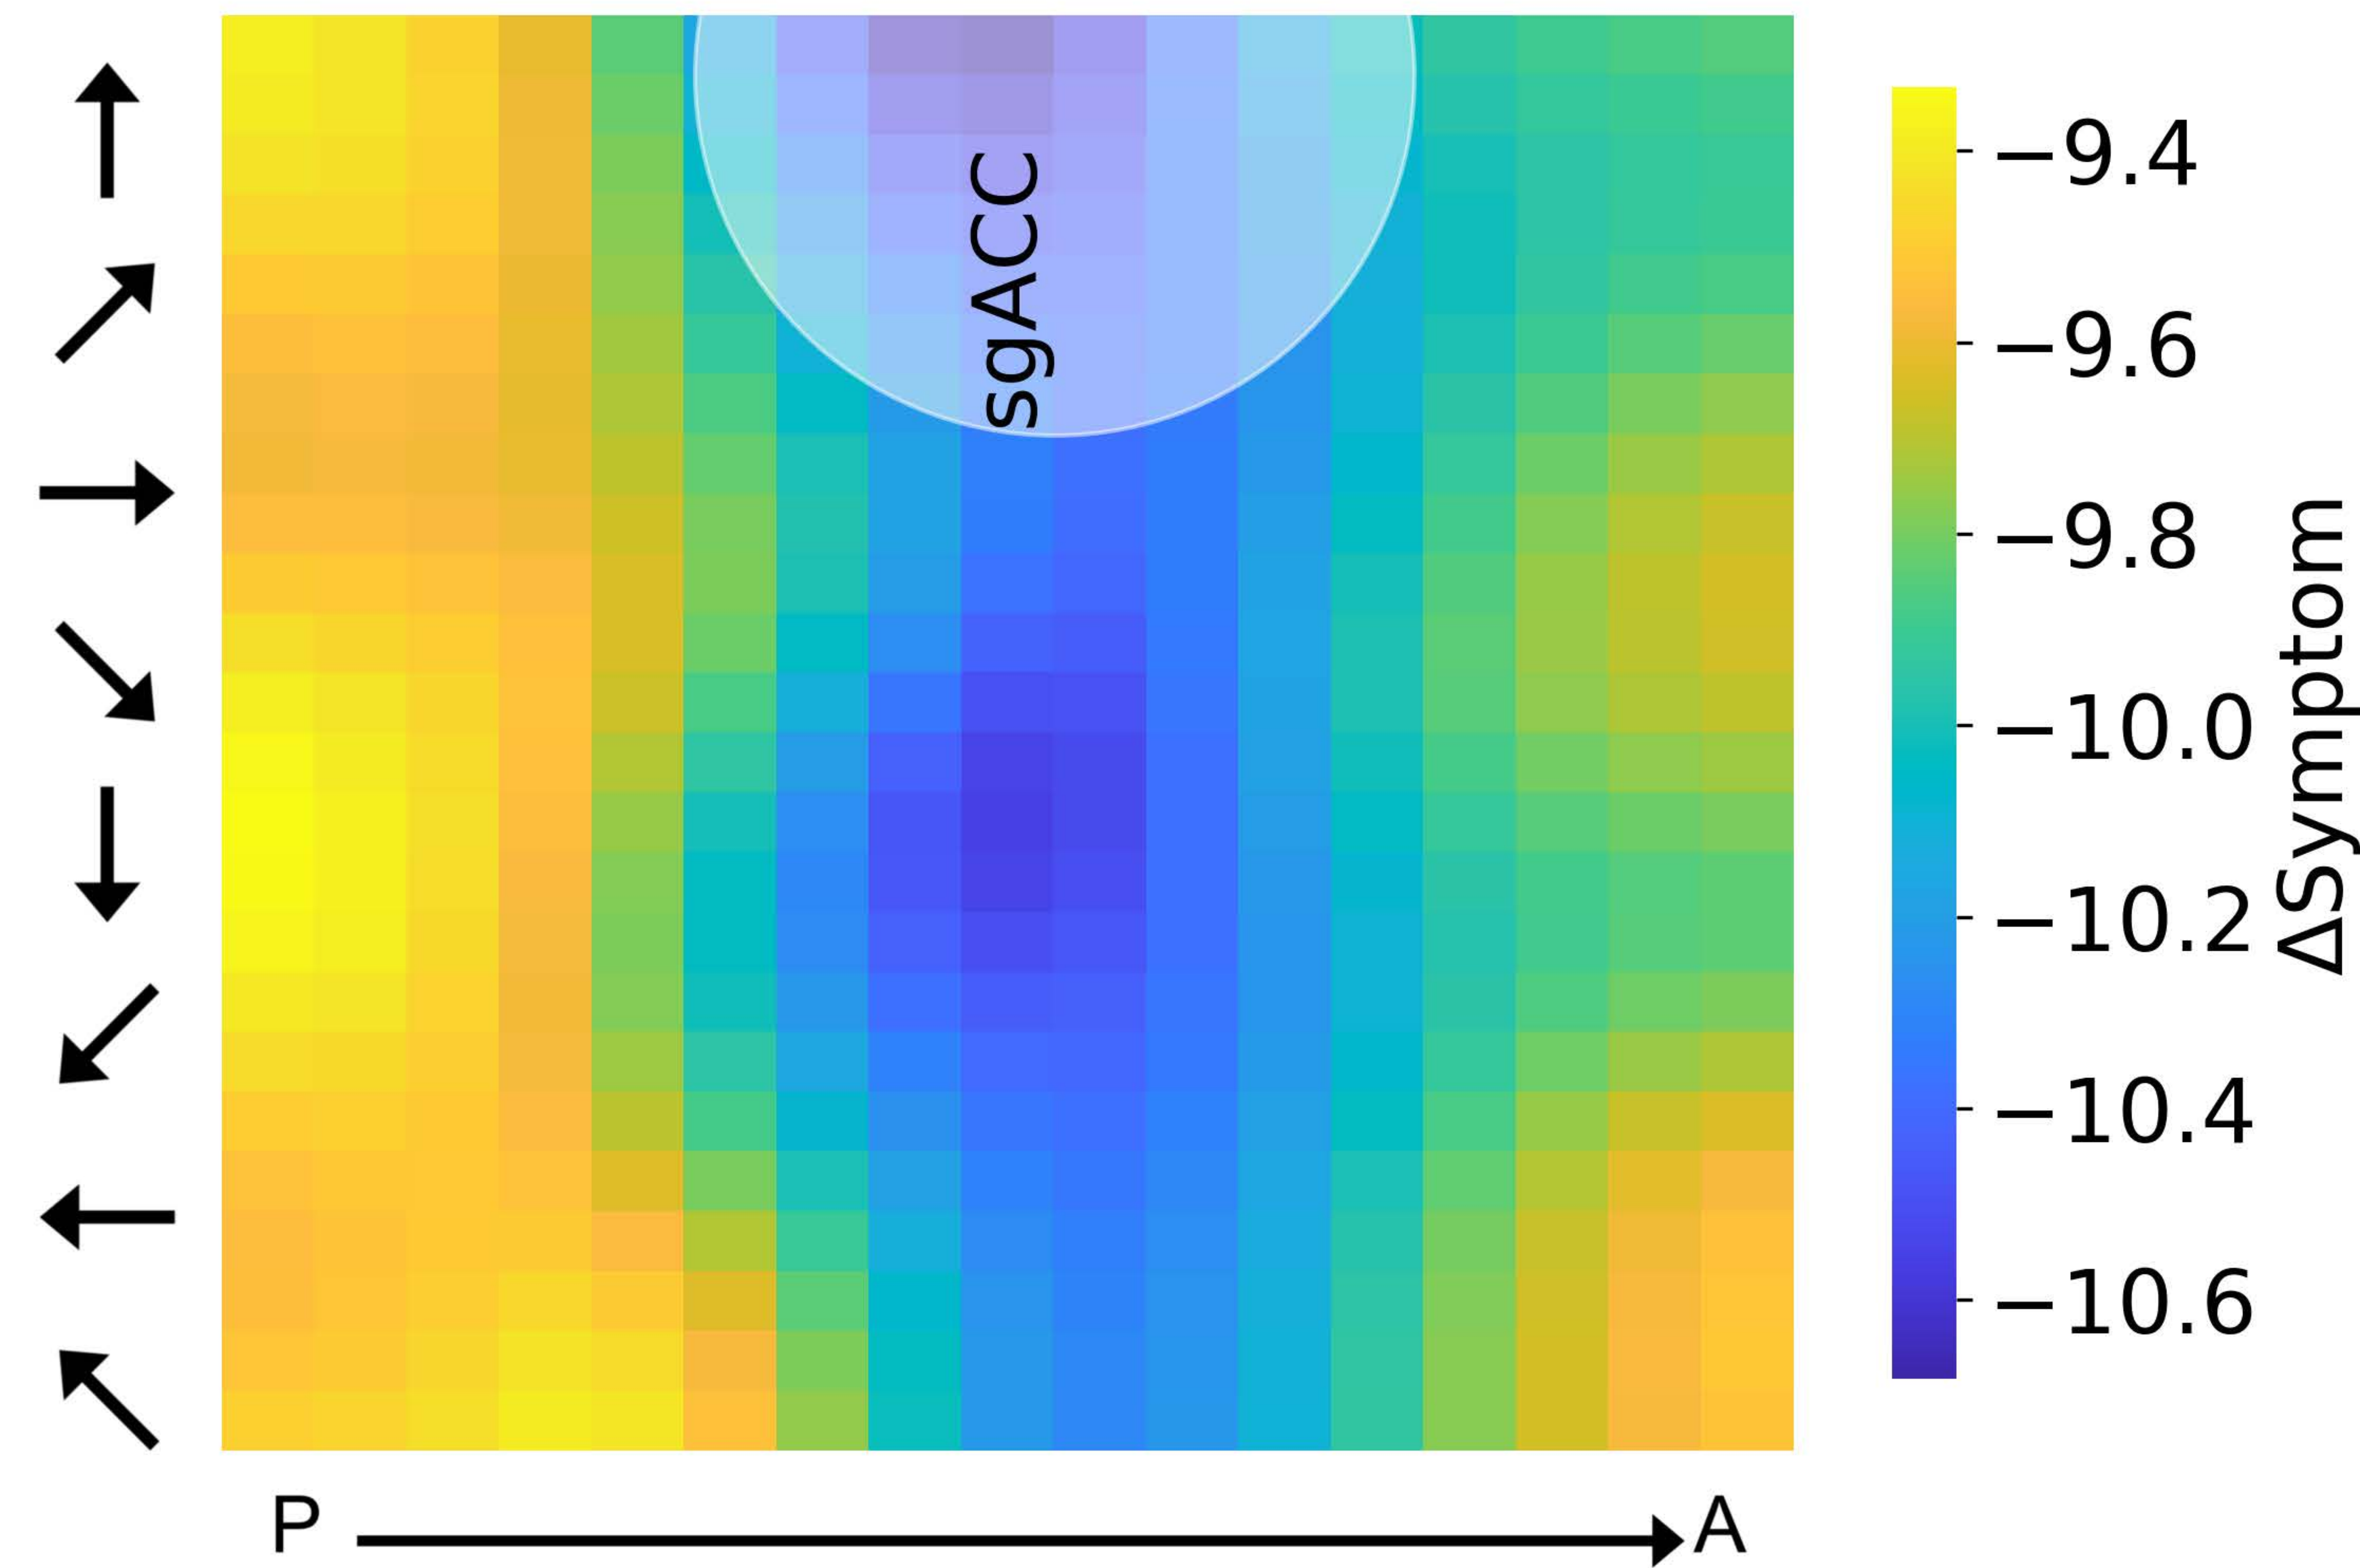



# NDARFR746ENQ\_madr\_left\_dlpfc

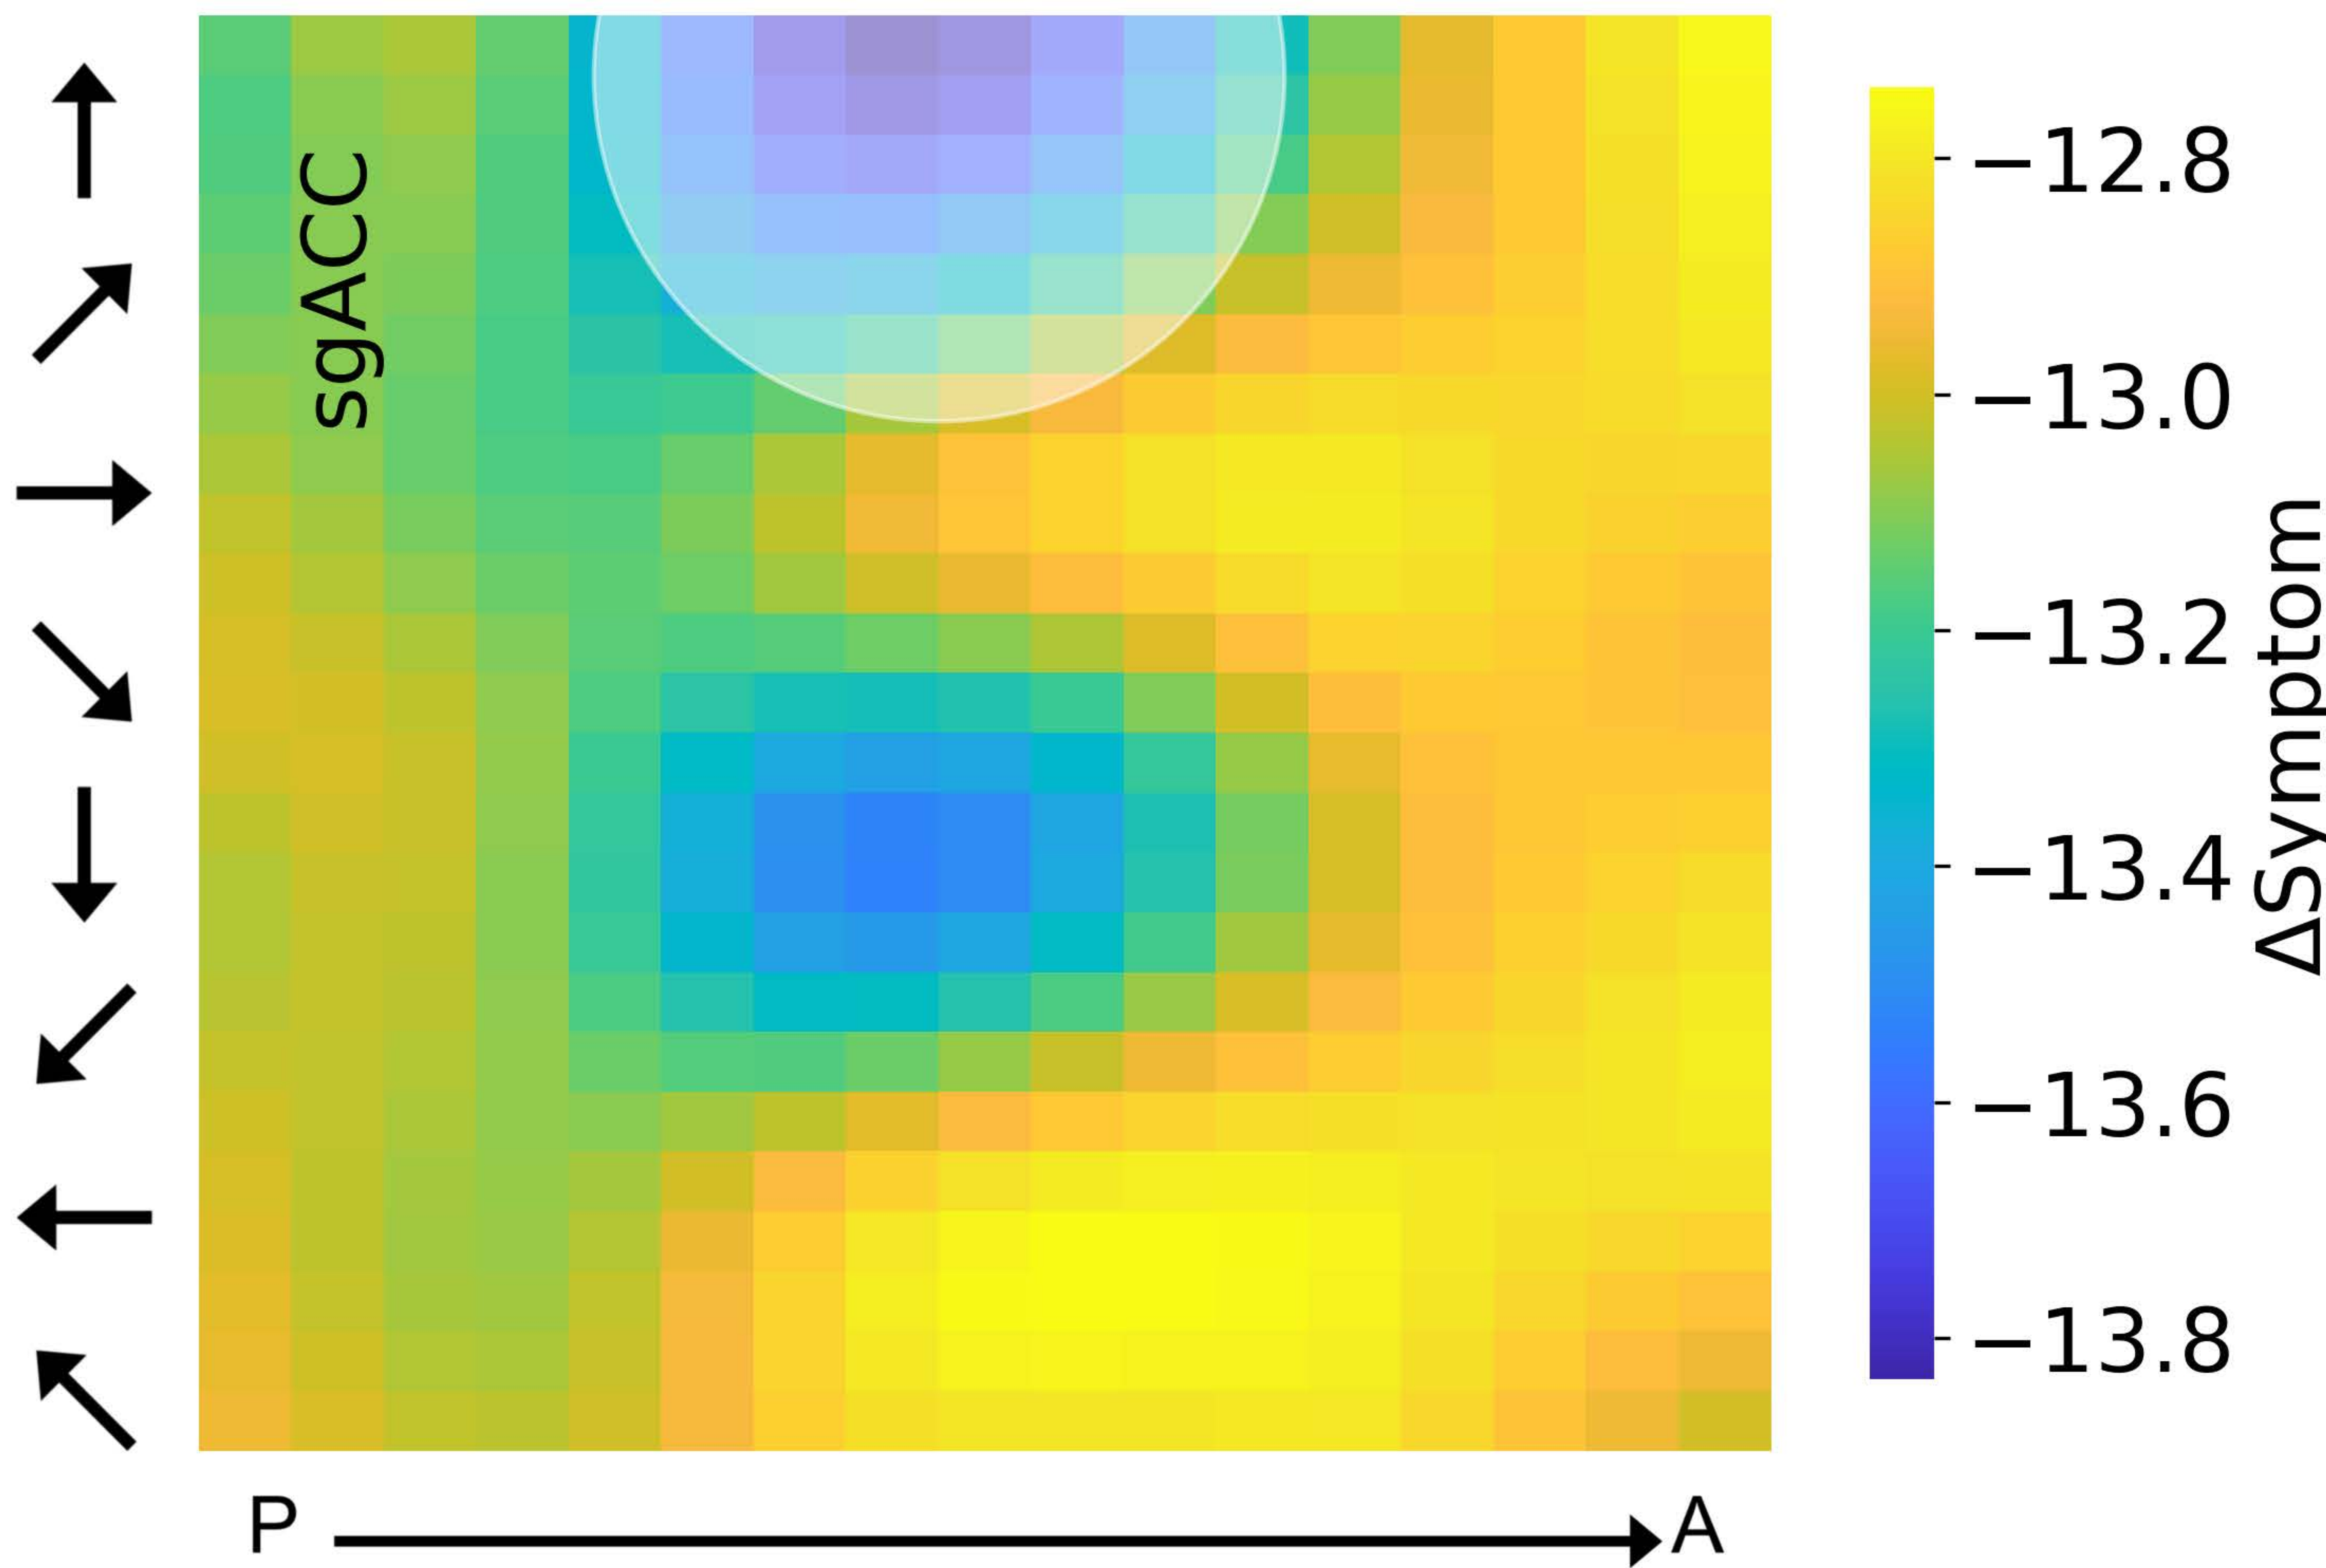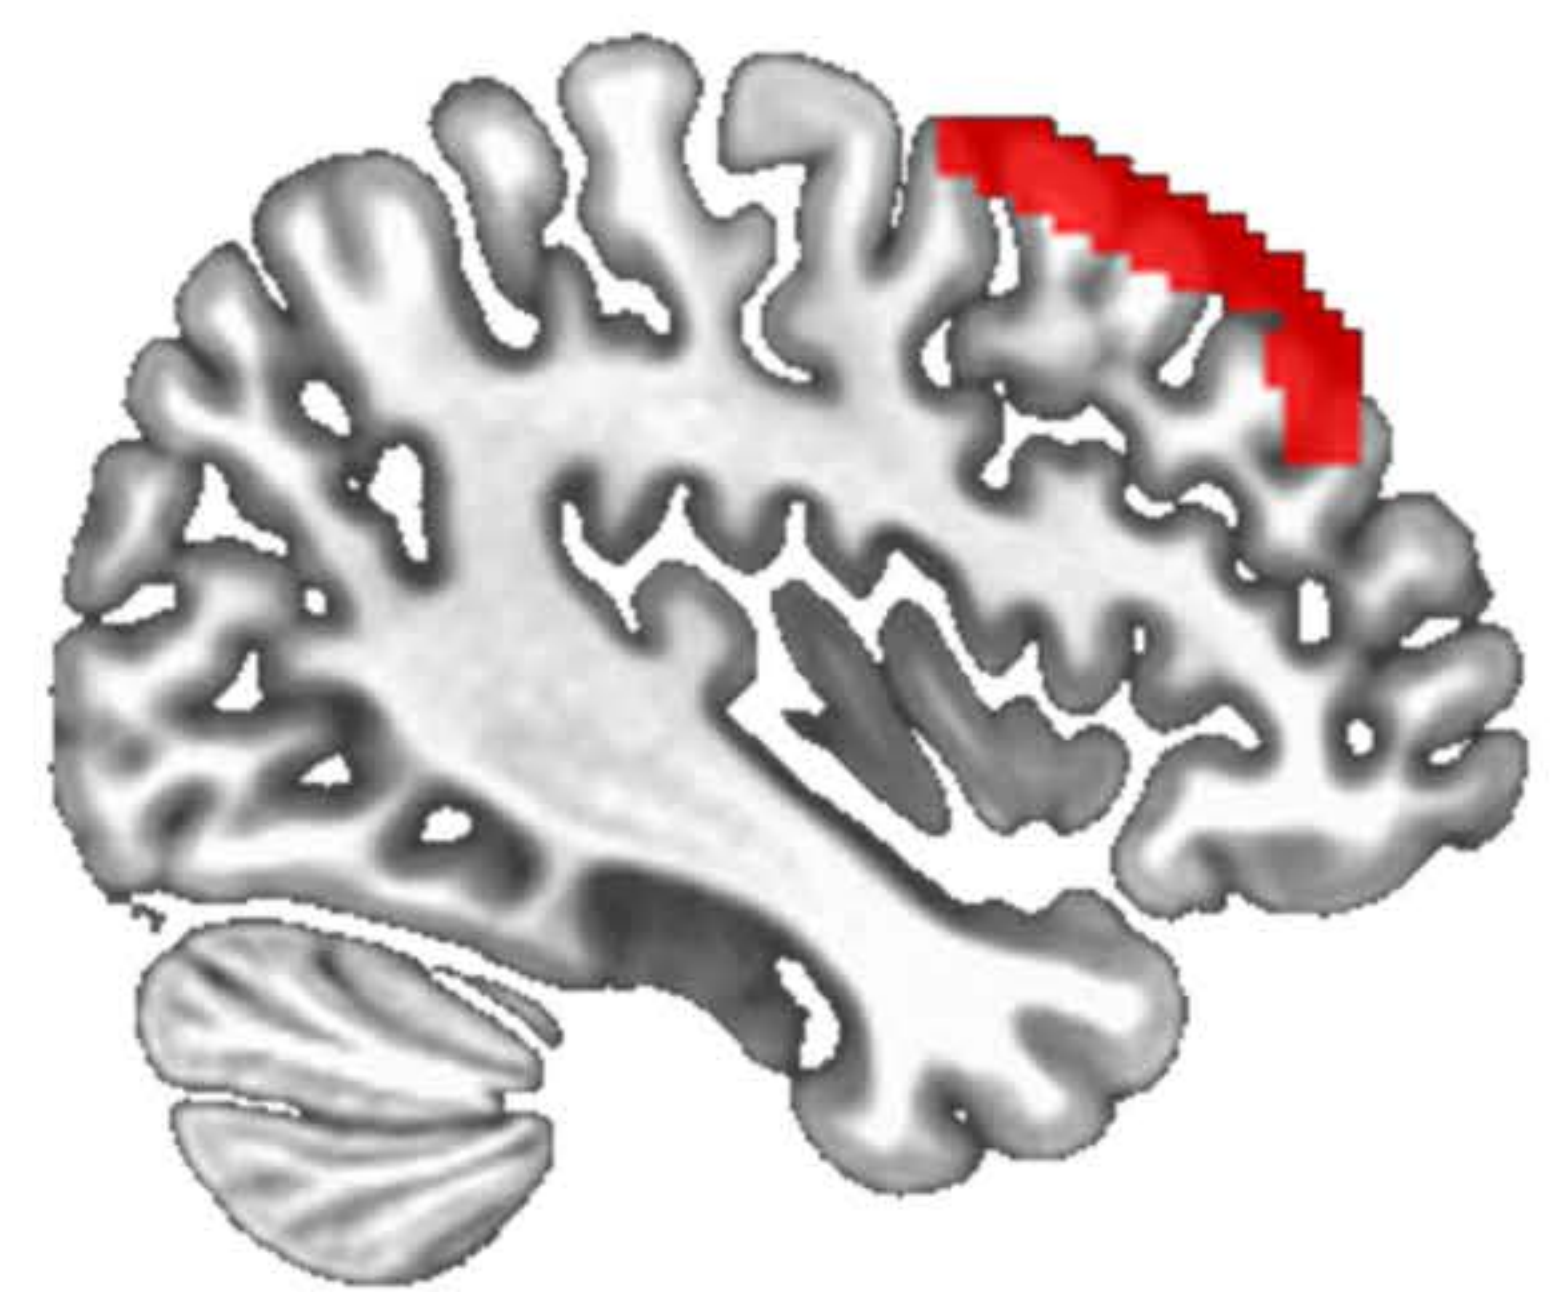



# NDARFW096LMD\_madrs\_left\_dlpfc

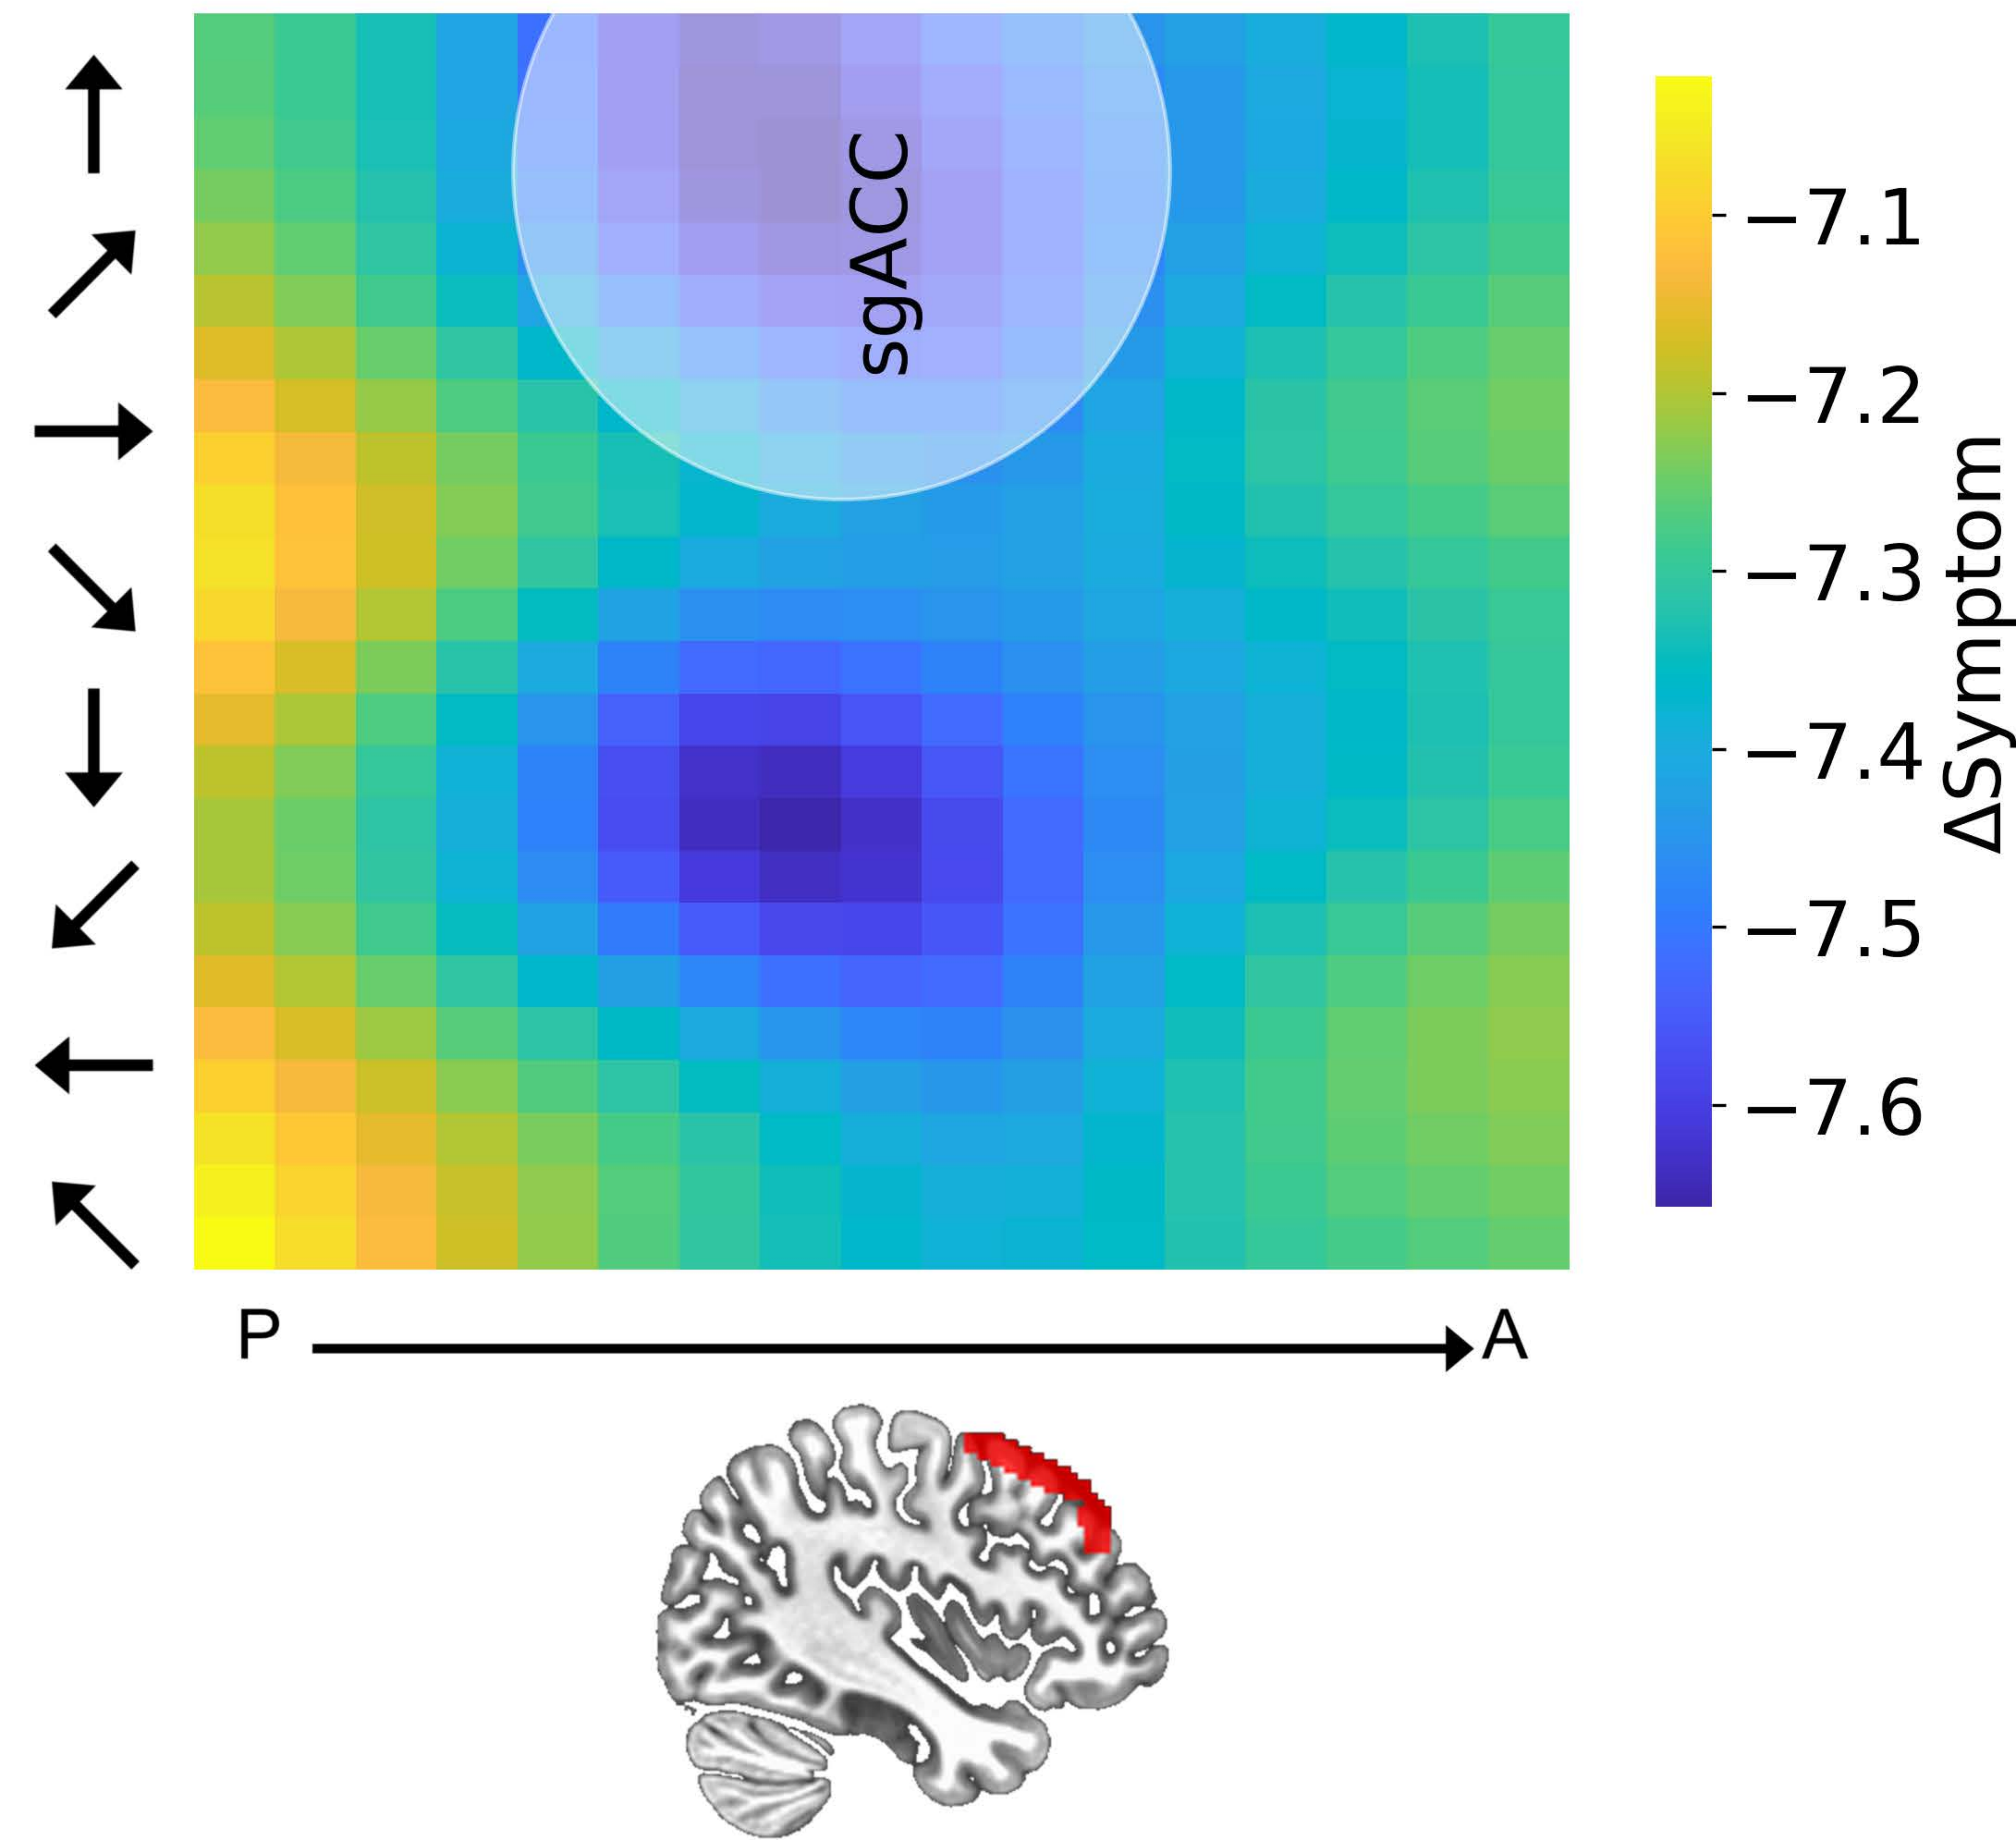



# NDARGH895WJJ\_madrs\_left\_dlpfc

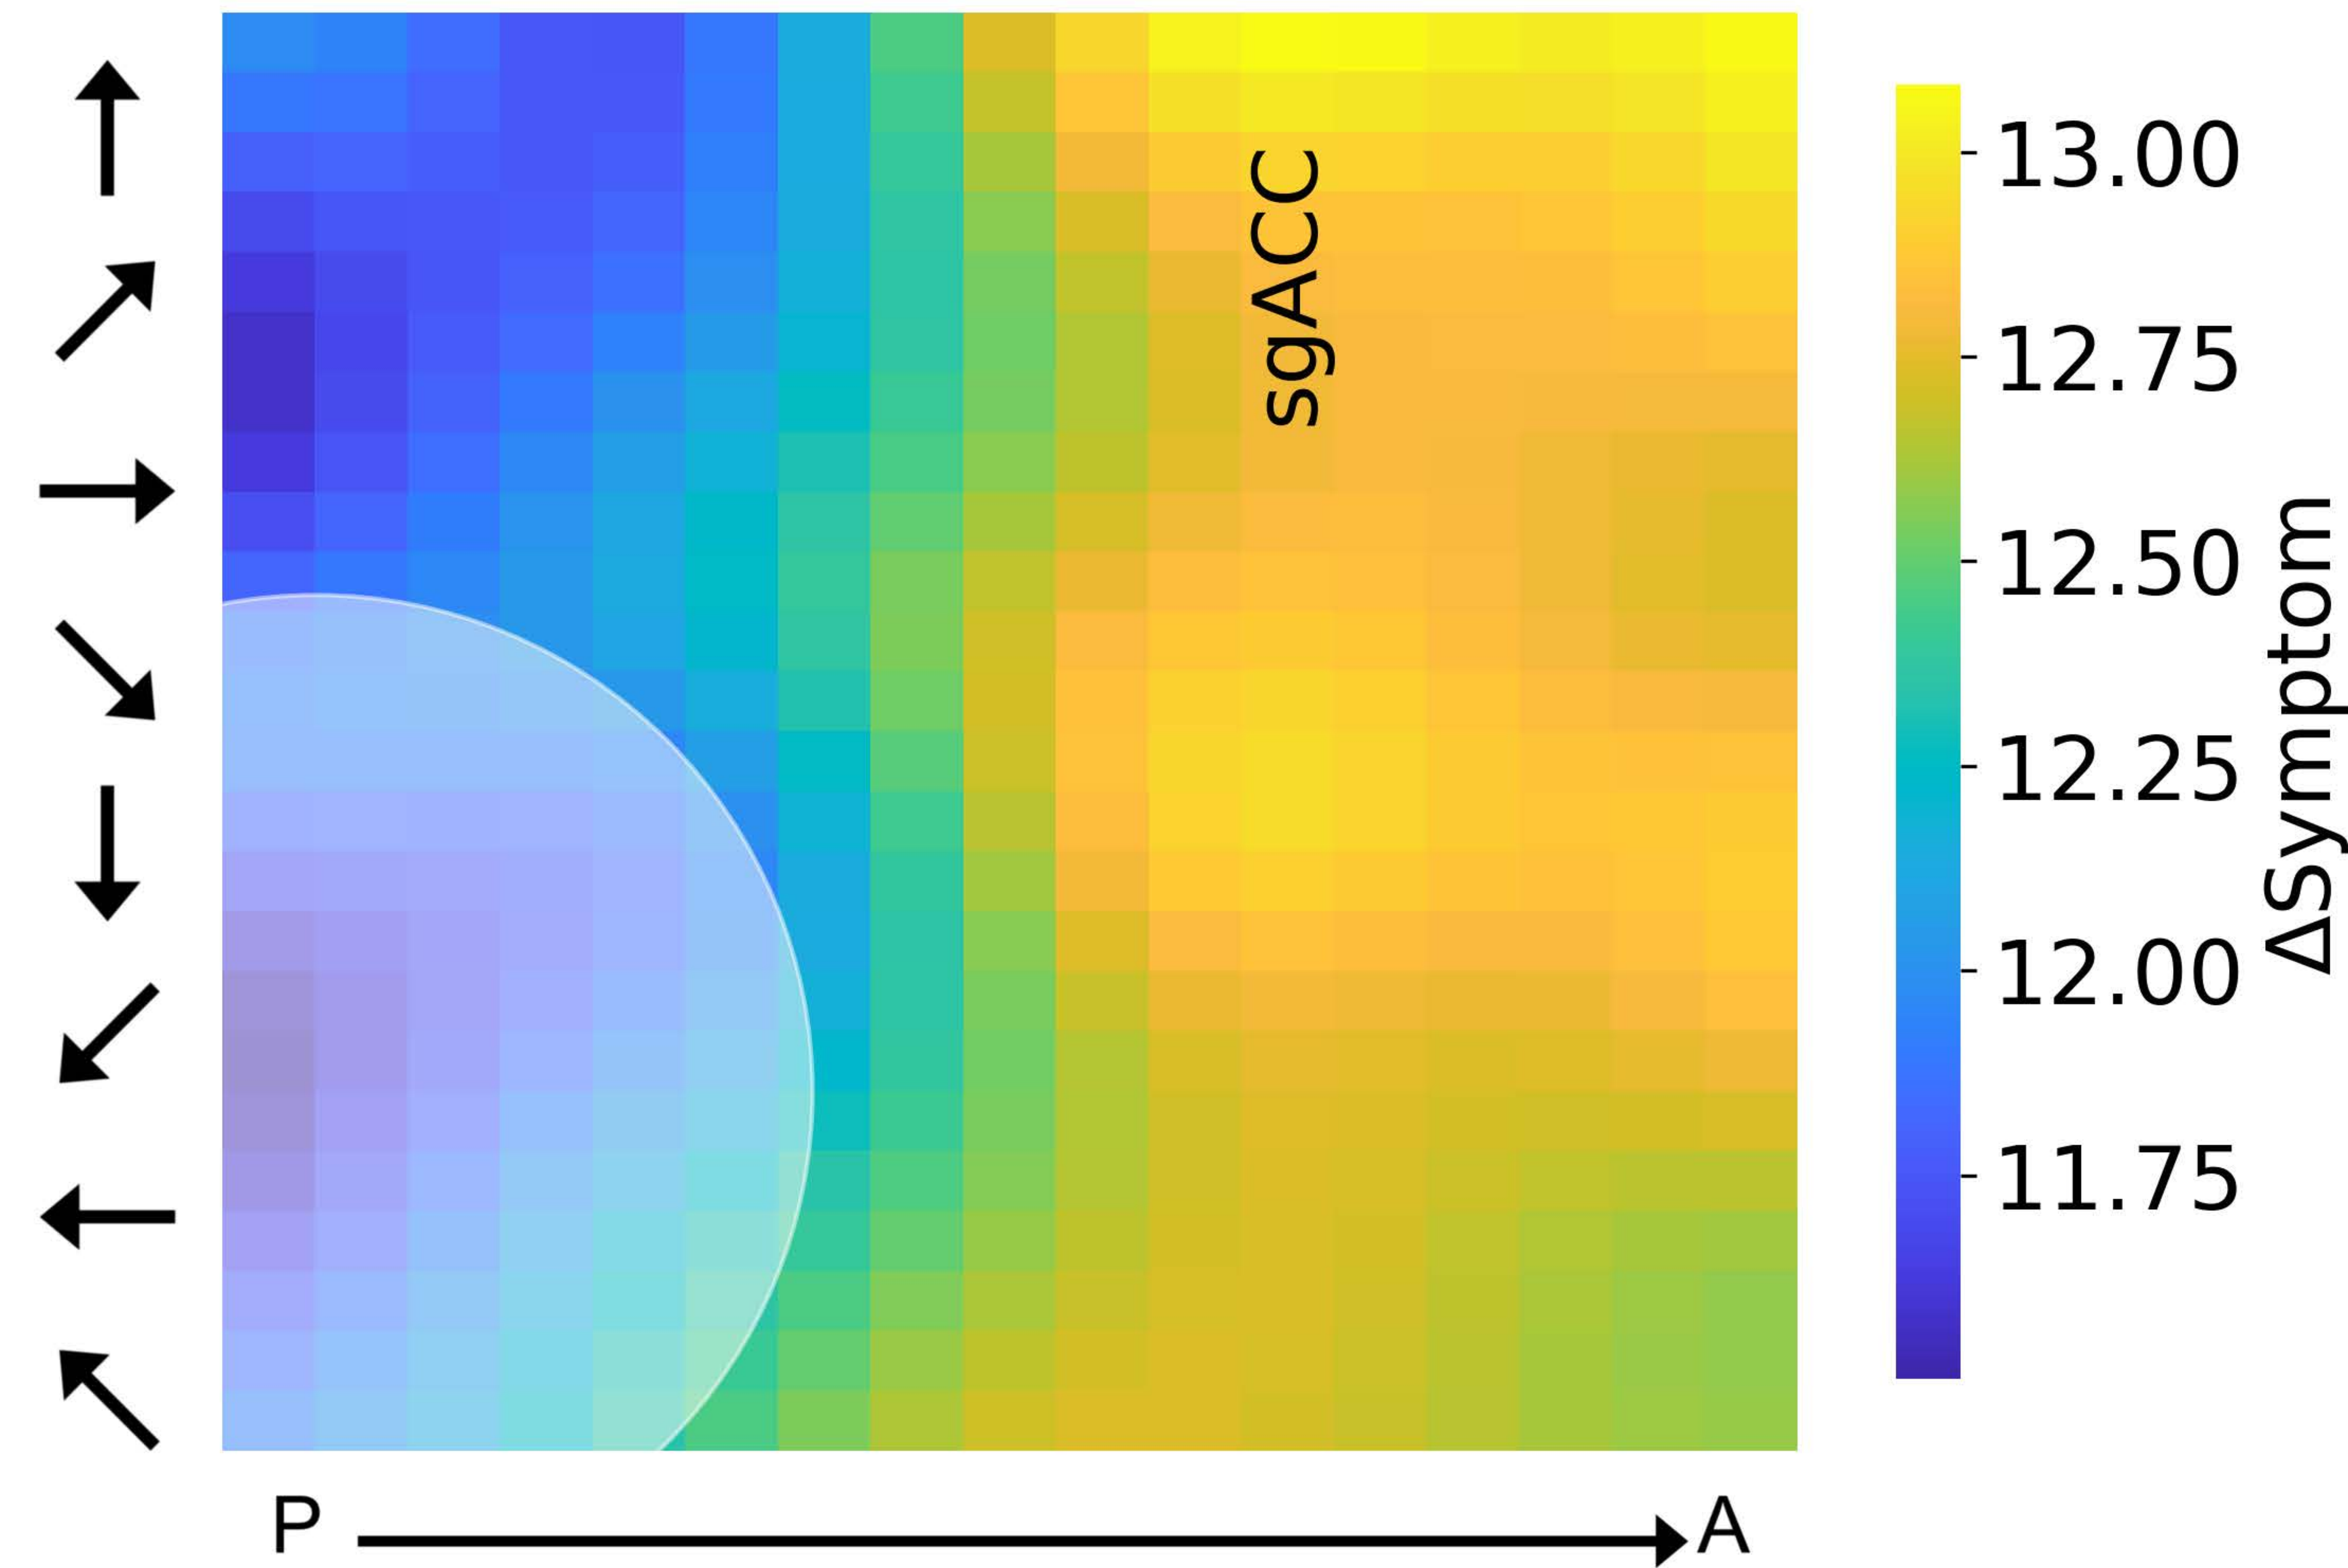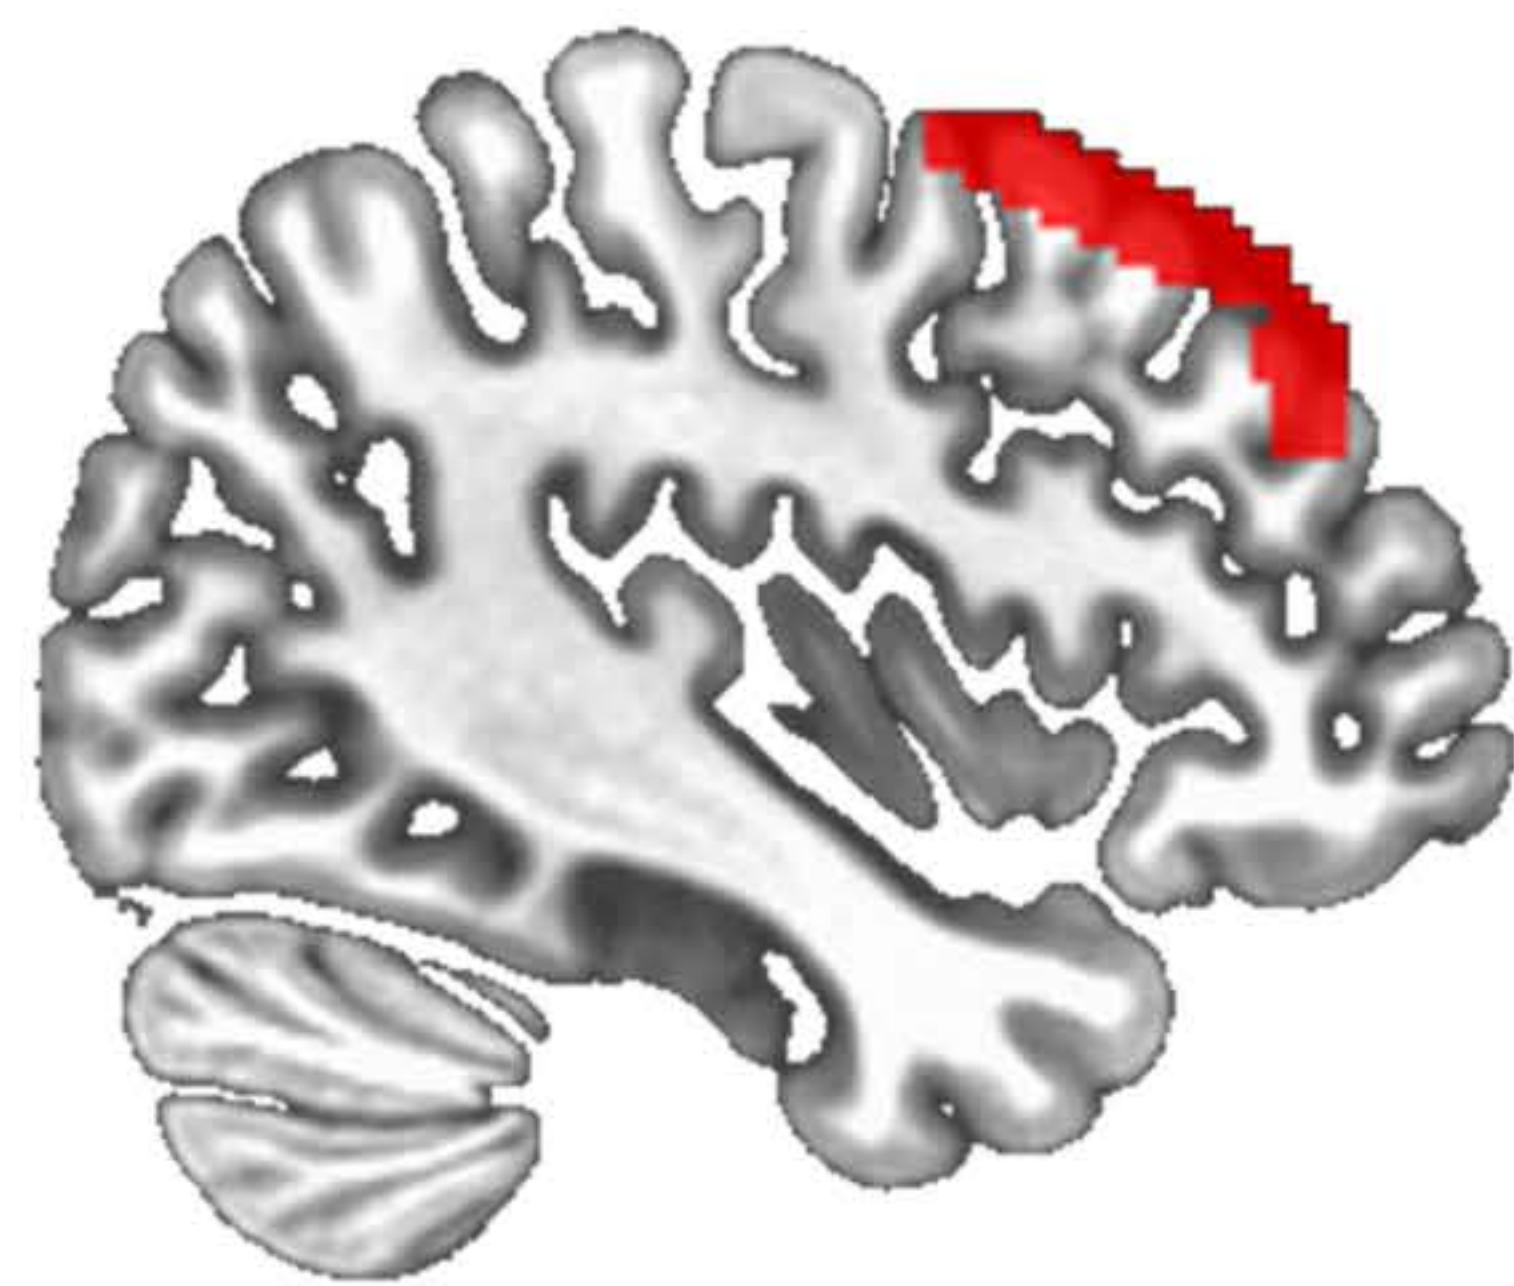



# NDARGR637FTT\_madr\_left\_dlpfc

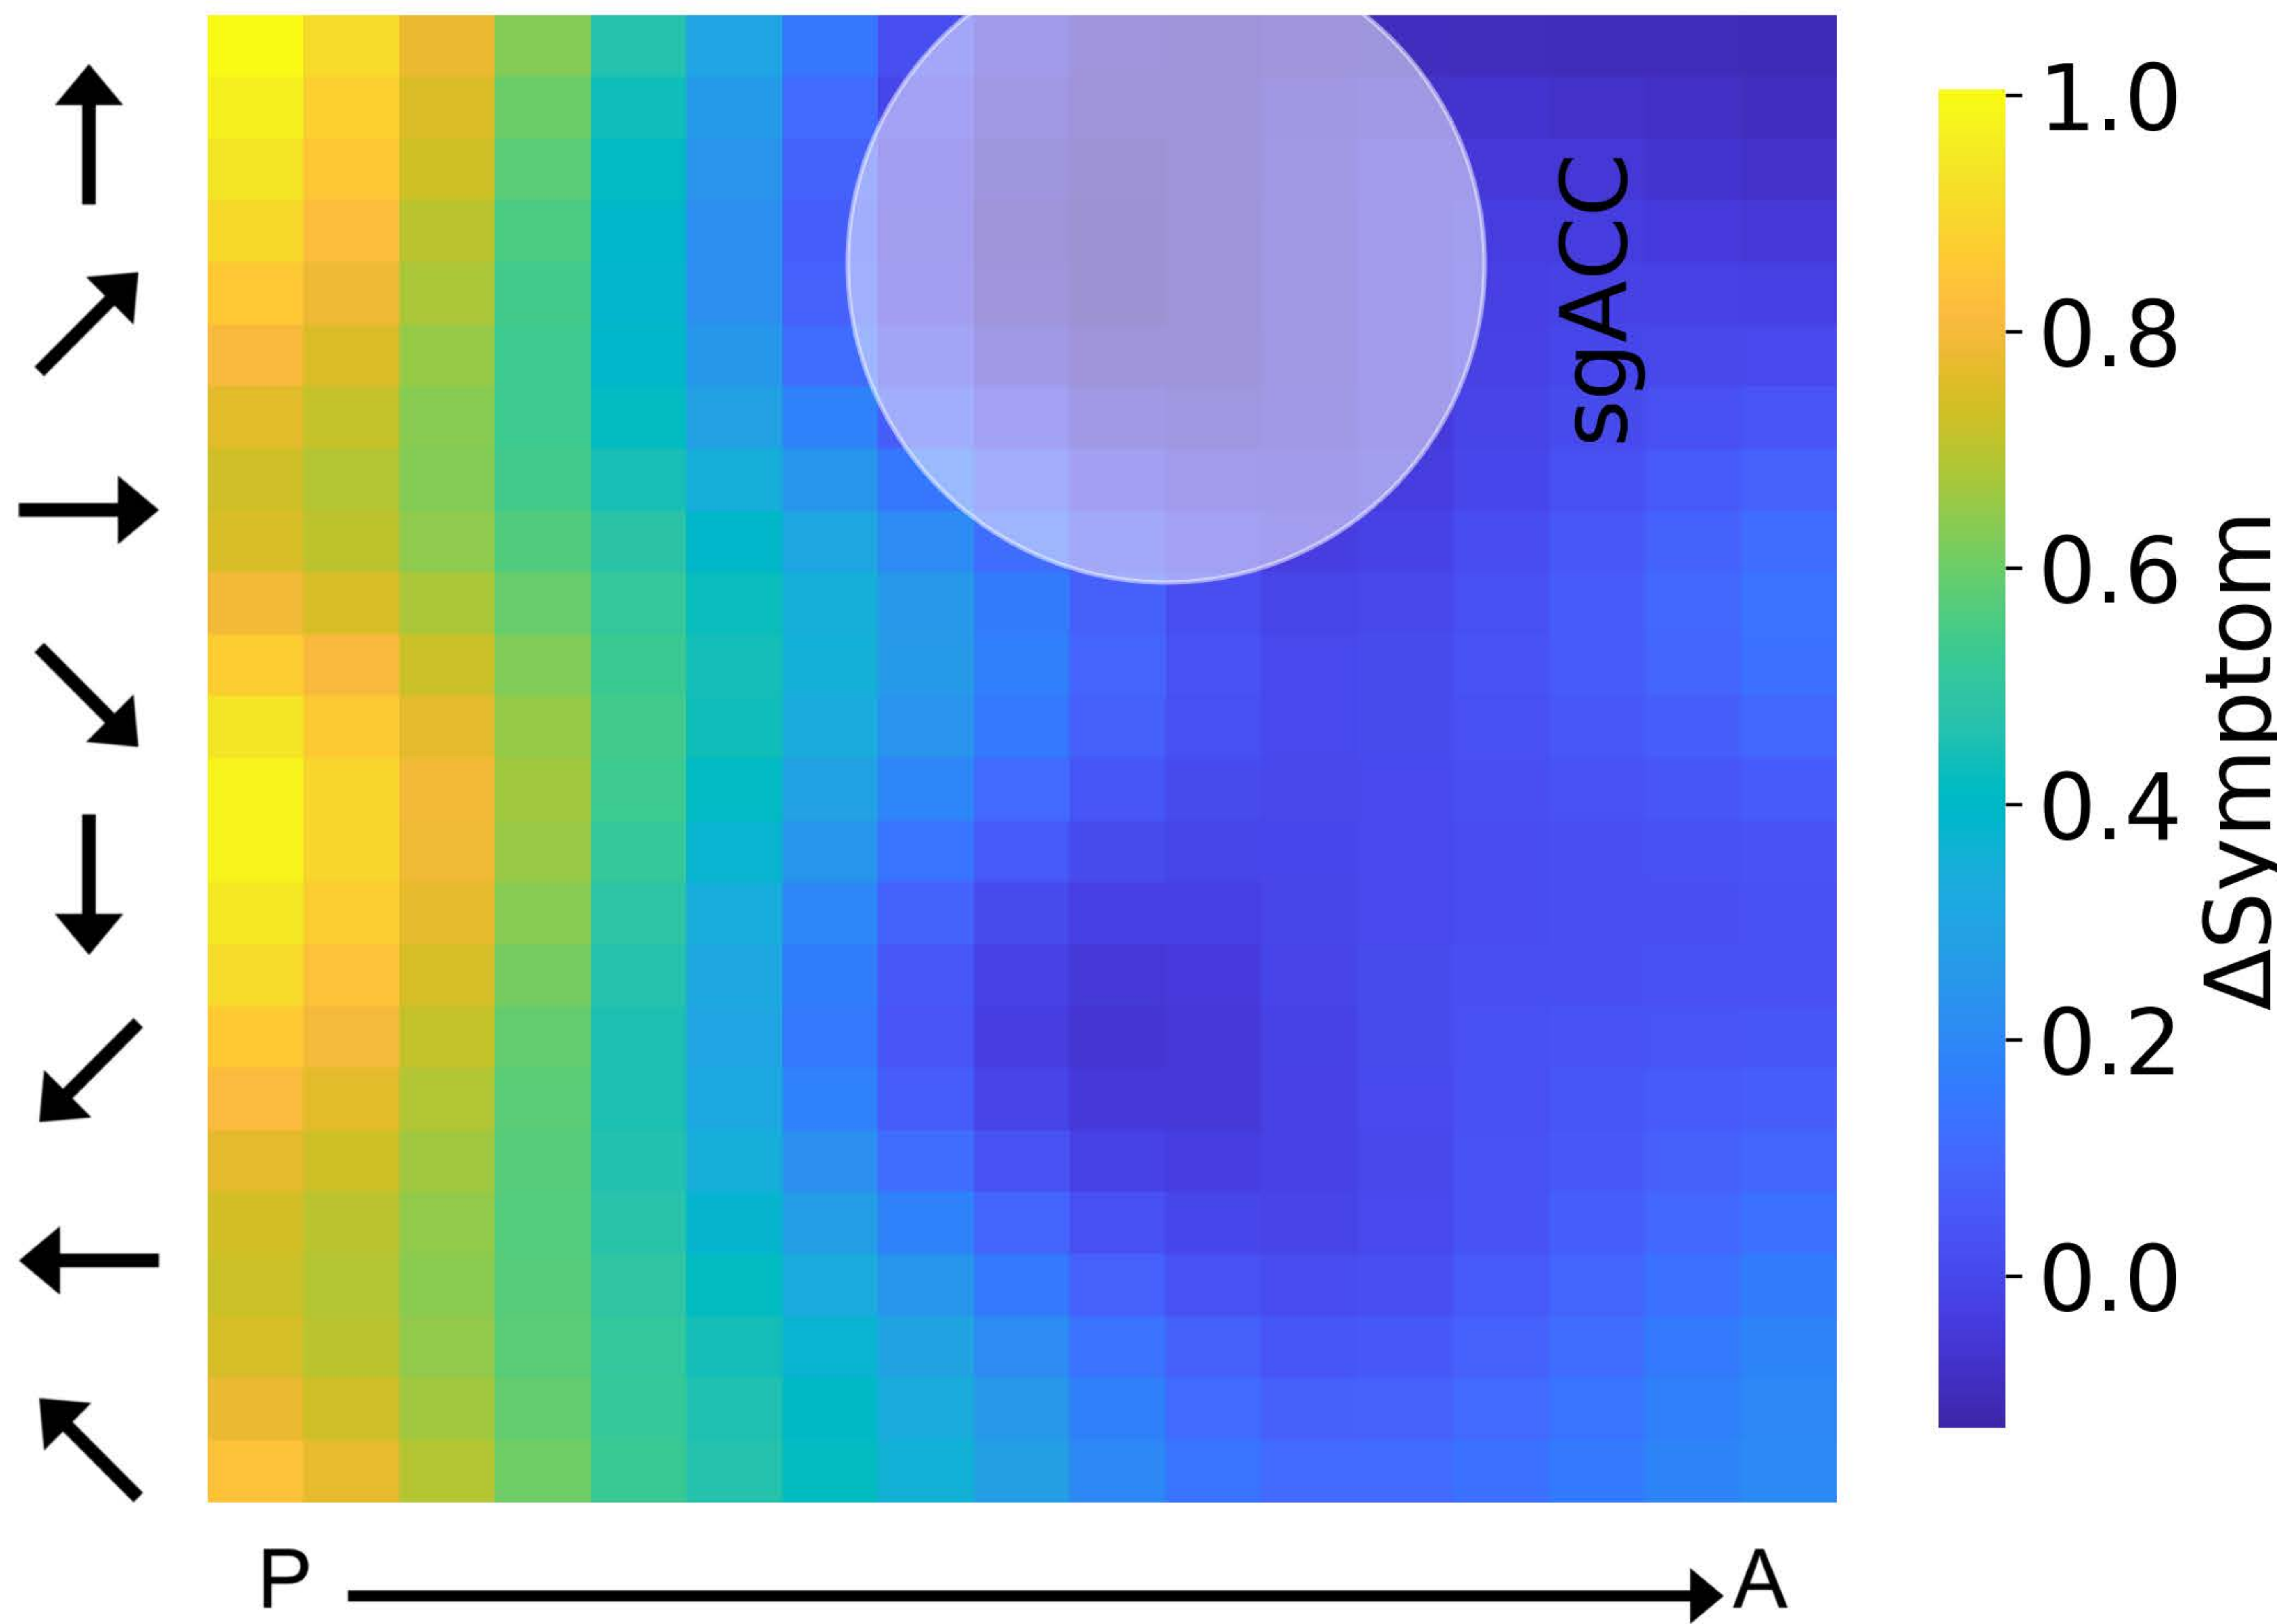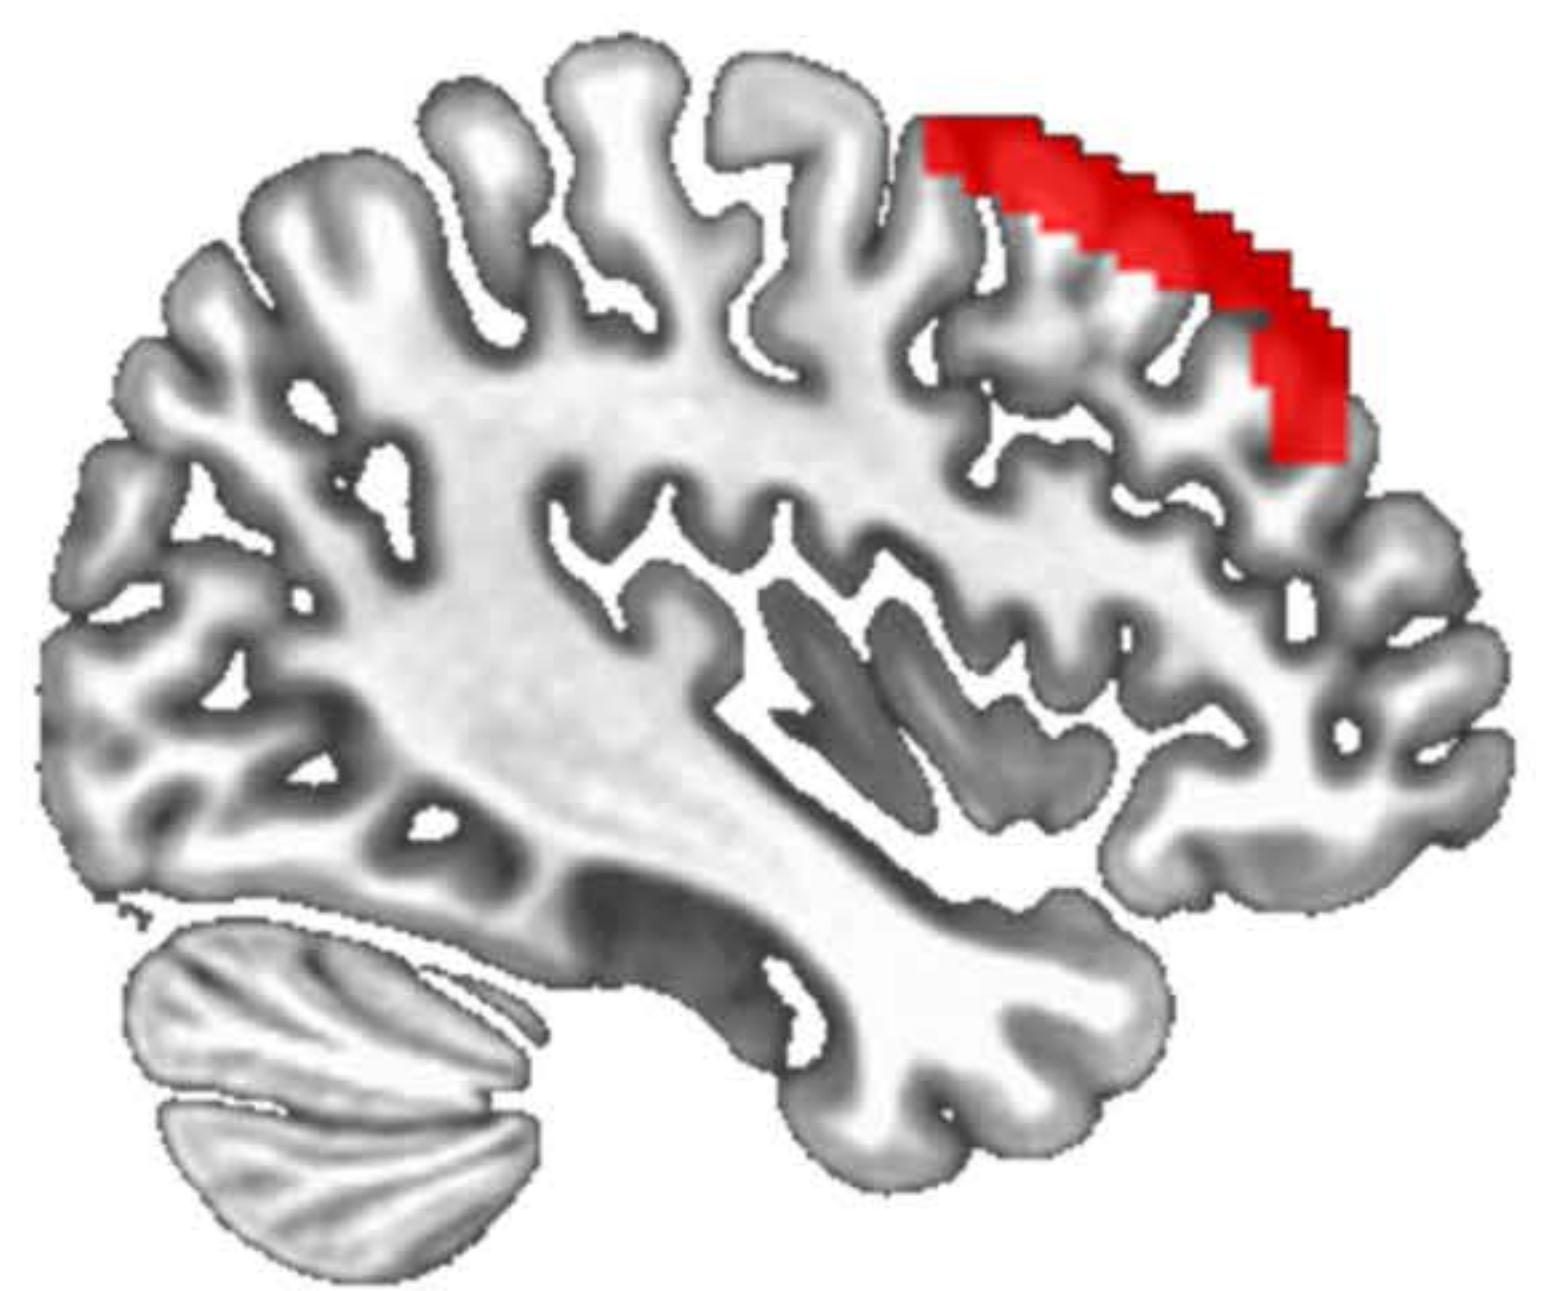



# NDARGR782ALD\_madr\_left\_dlpfc

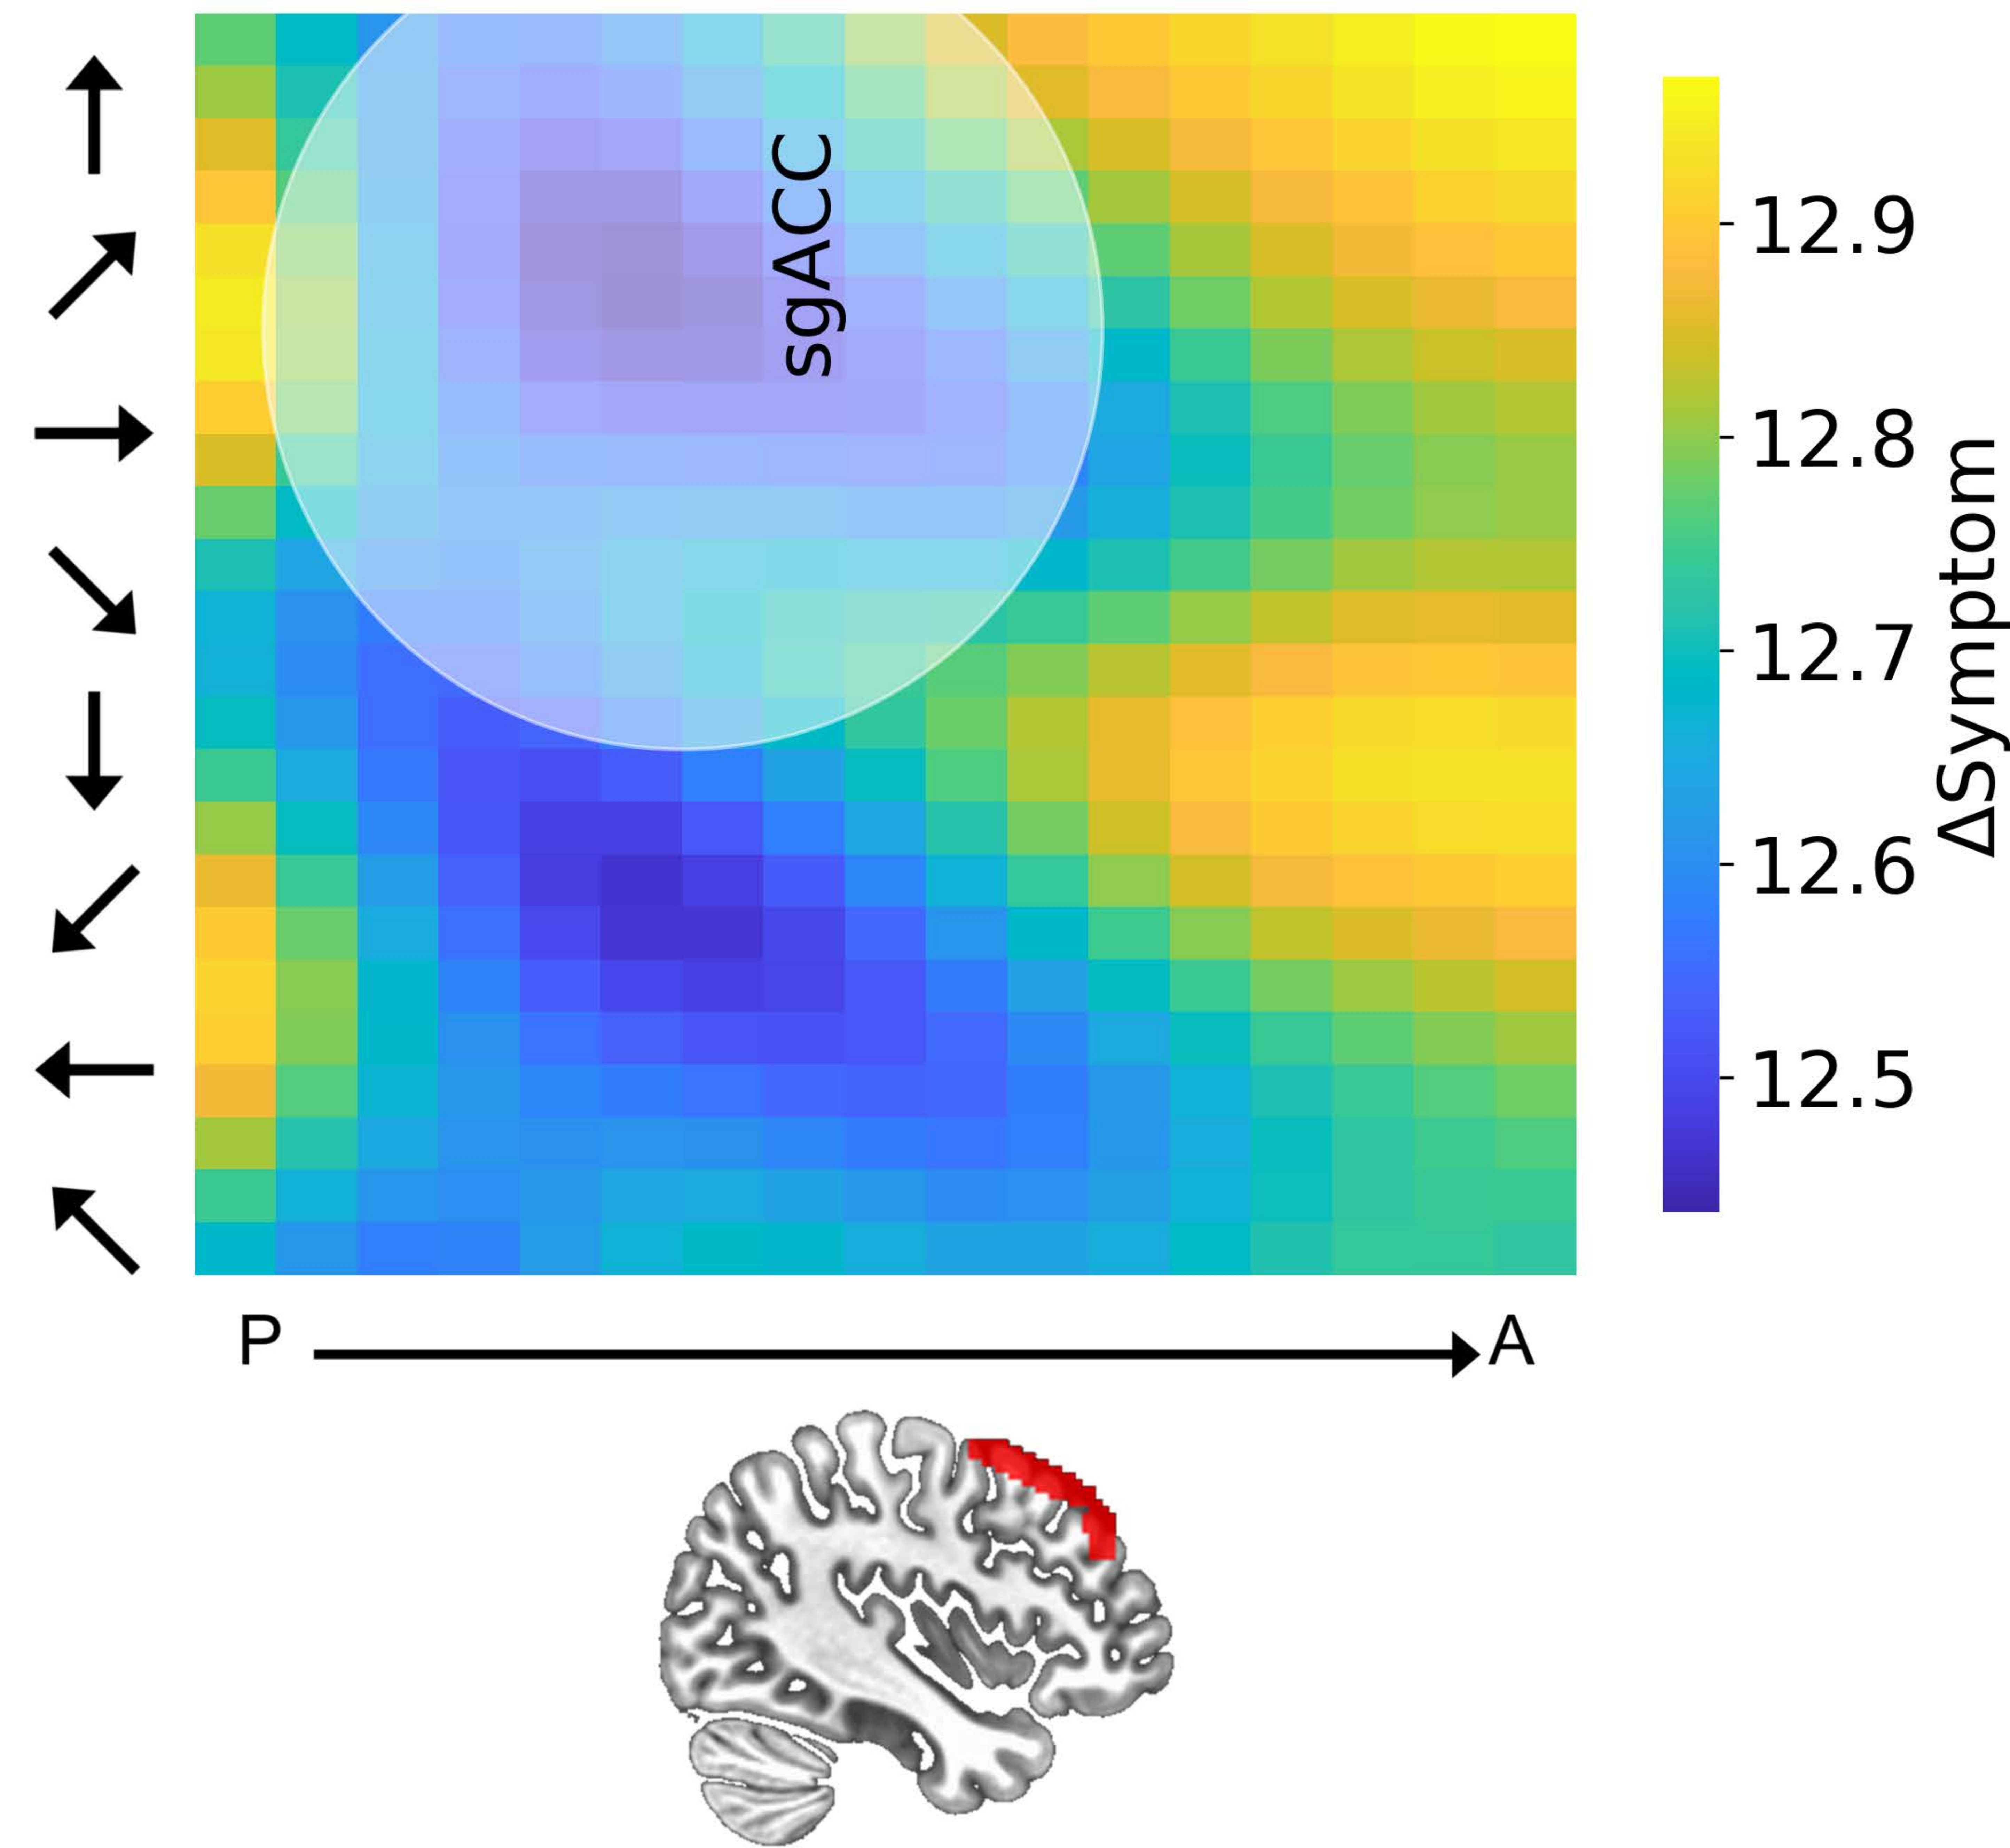



# NDARHA109LH7\_madrs\_left\_dlpfc

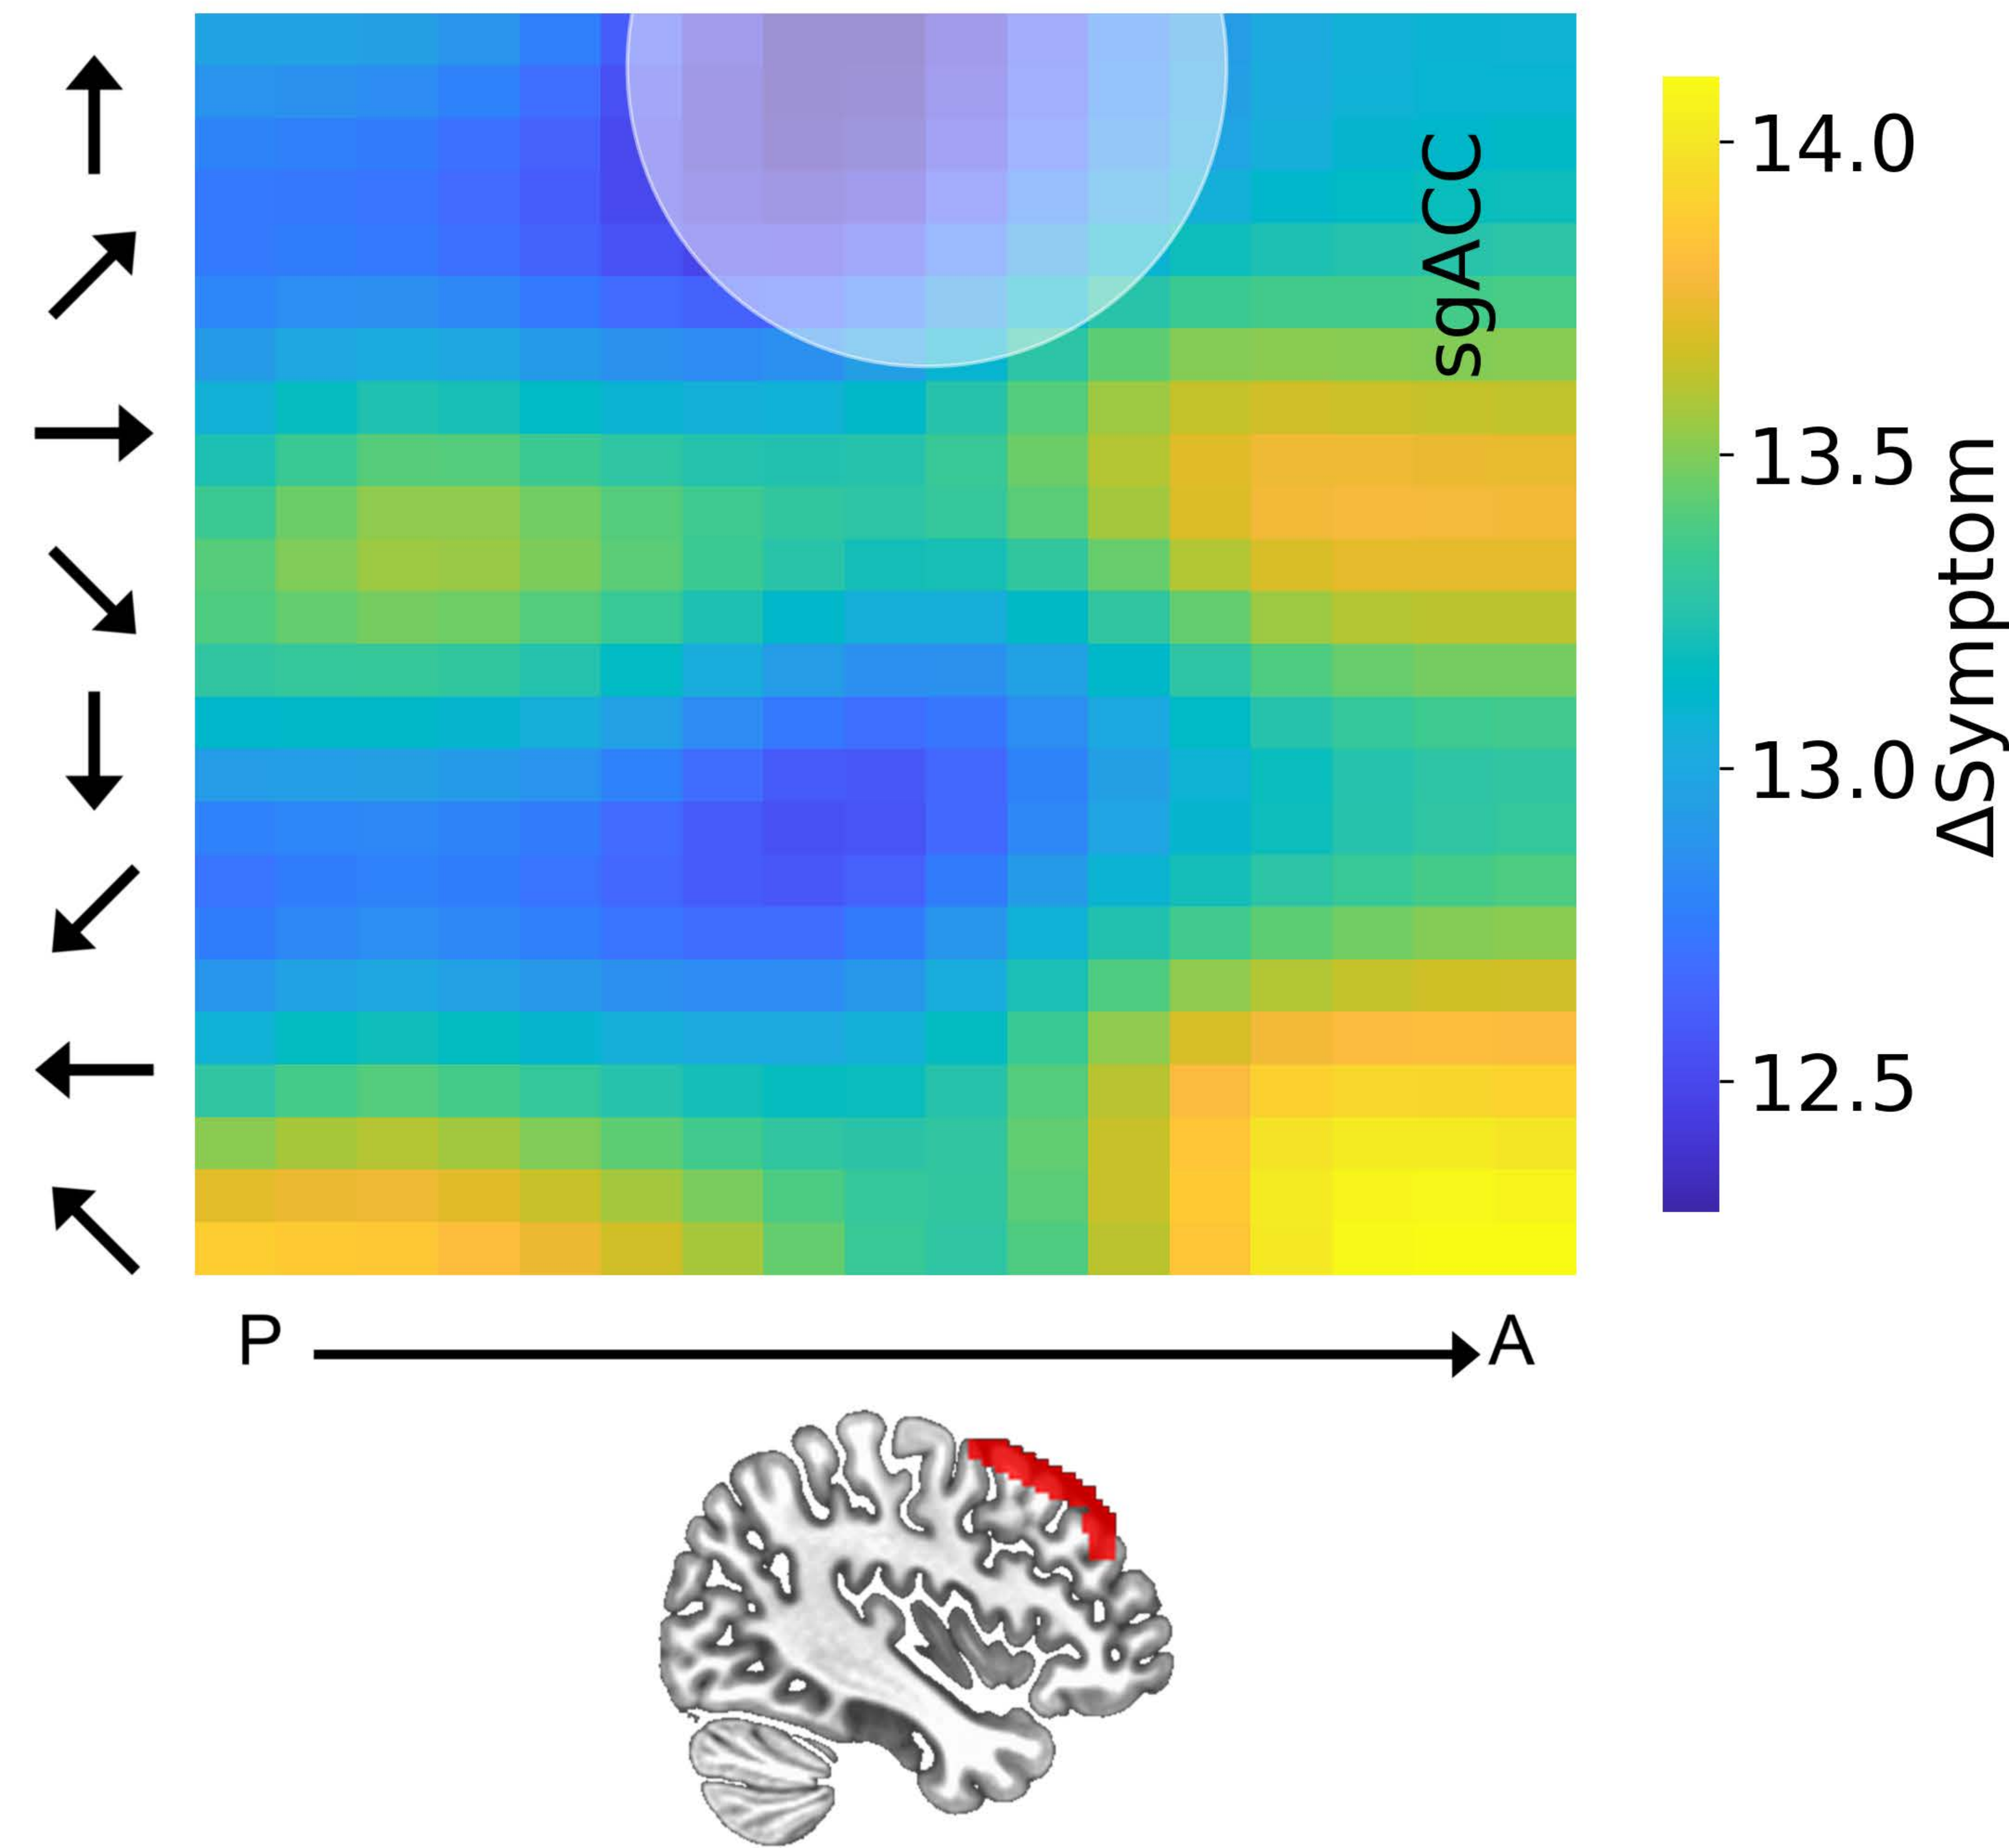



# NDARHR981AP1\_madrs\_left\_dlpfc

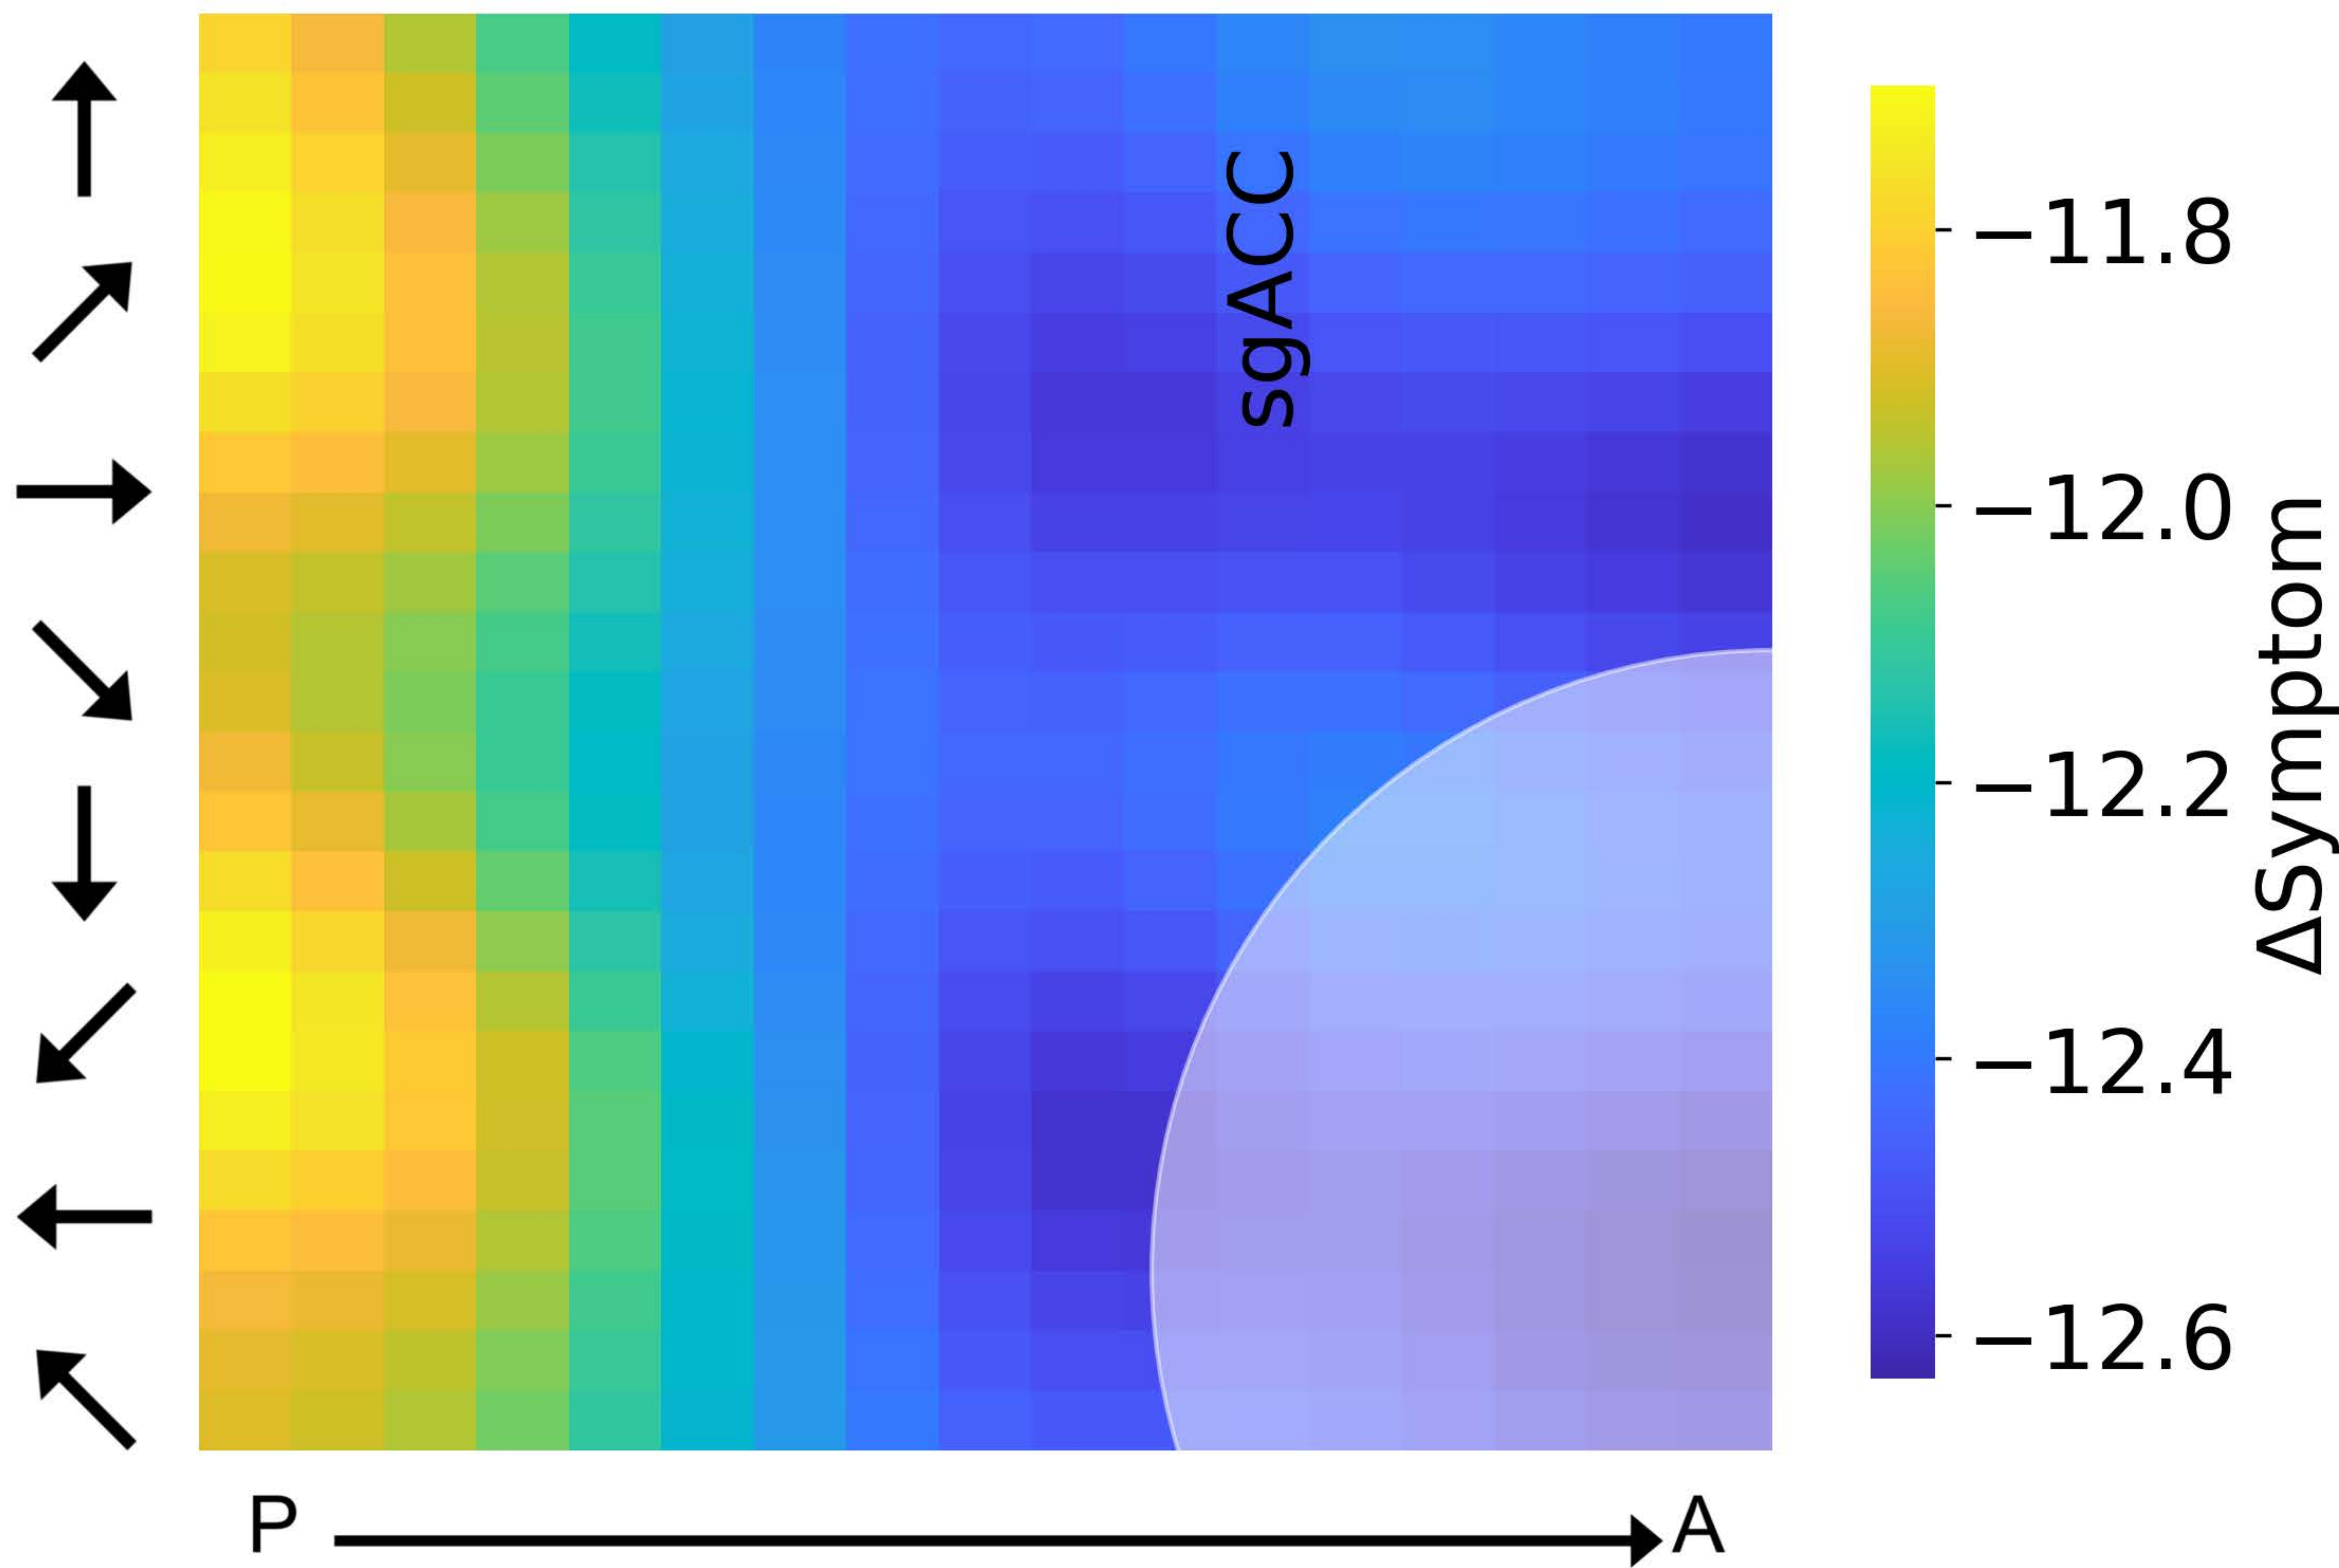



# NDARHX487CT9\_madrs\_left\_dlpfc

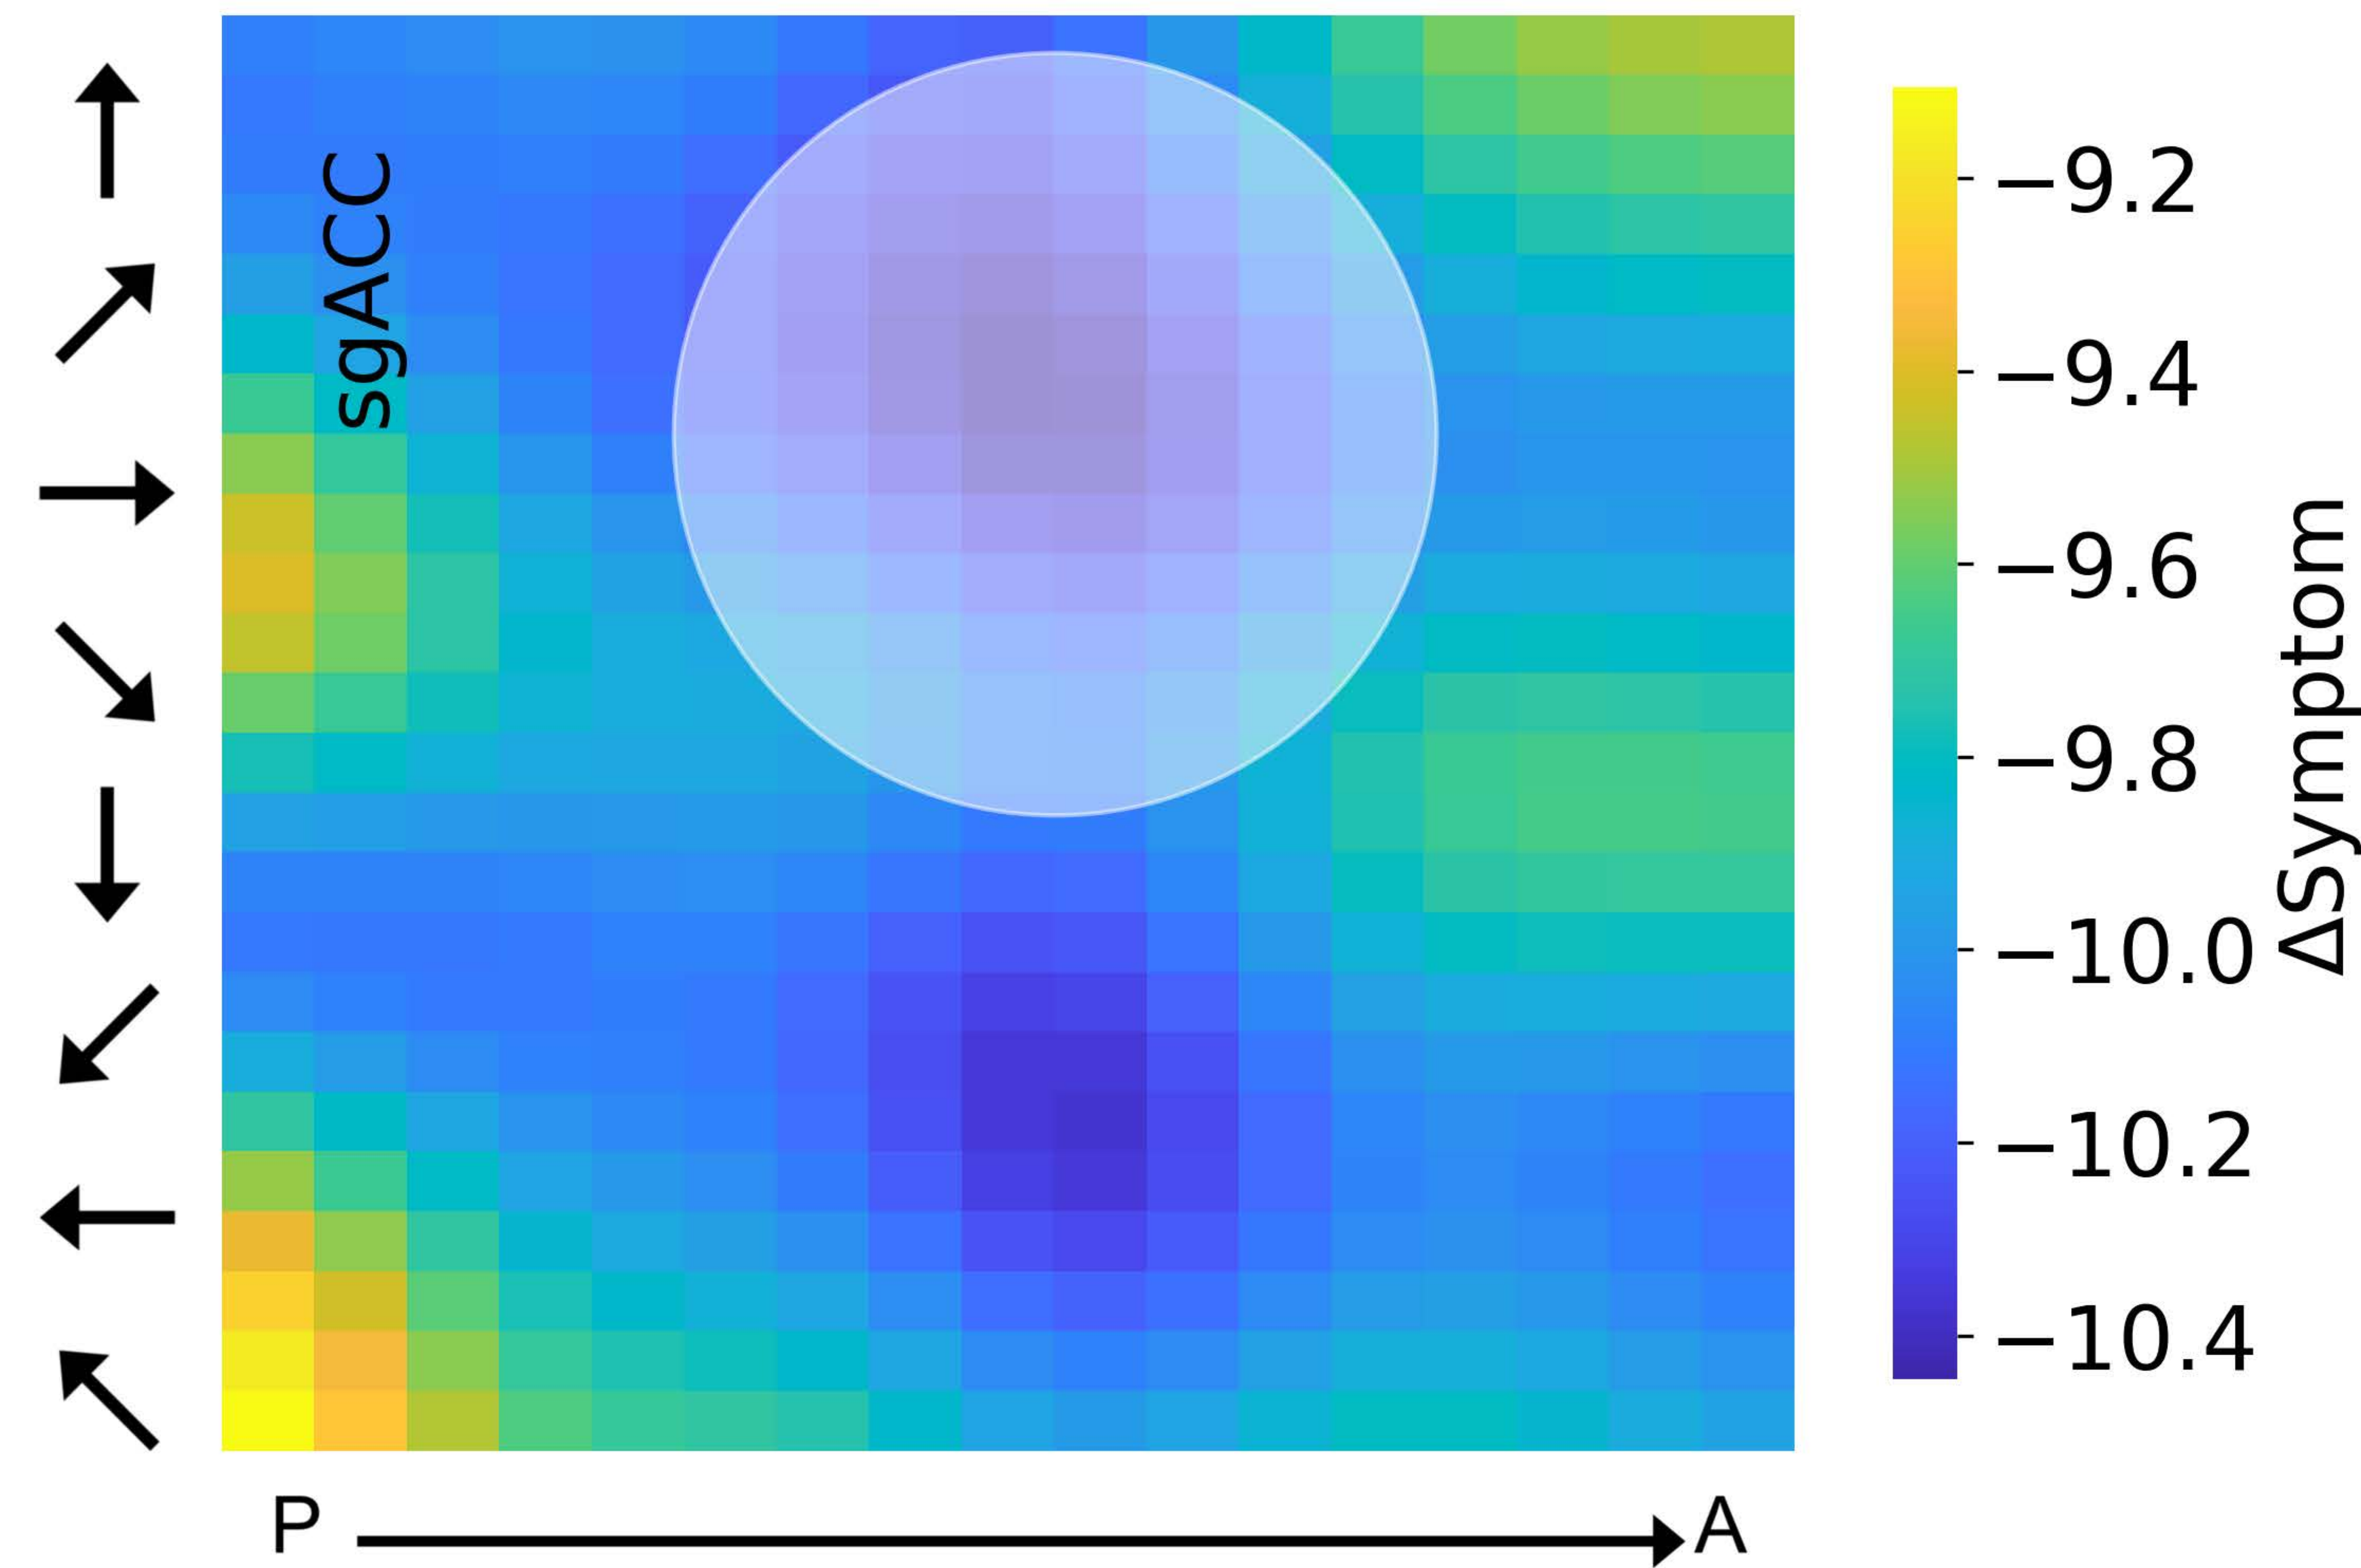



# NDARHZ301NUW\_madrs\_left\_dlpfc

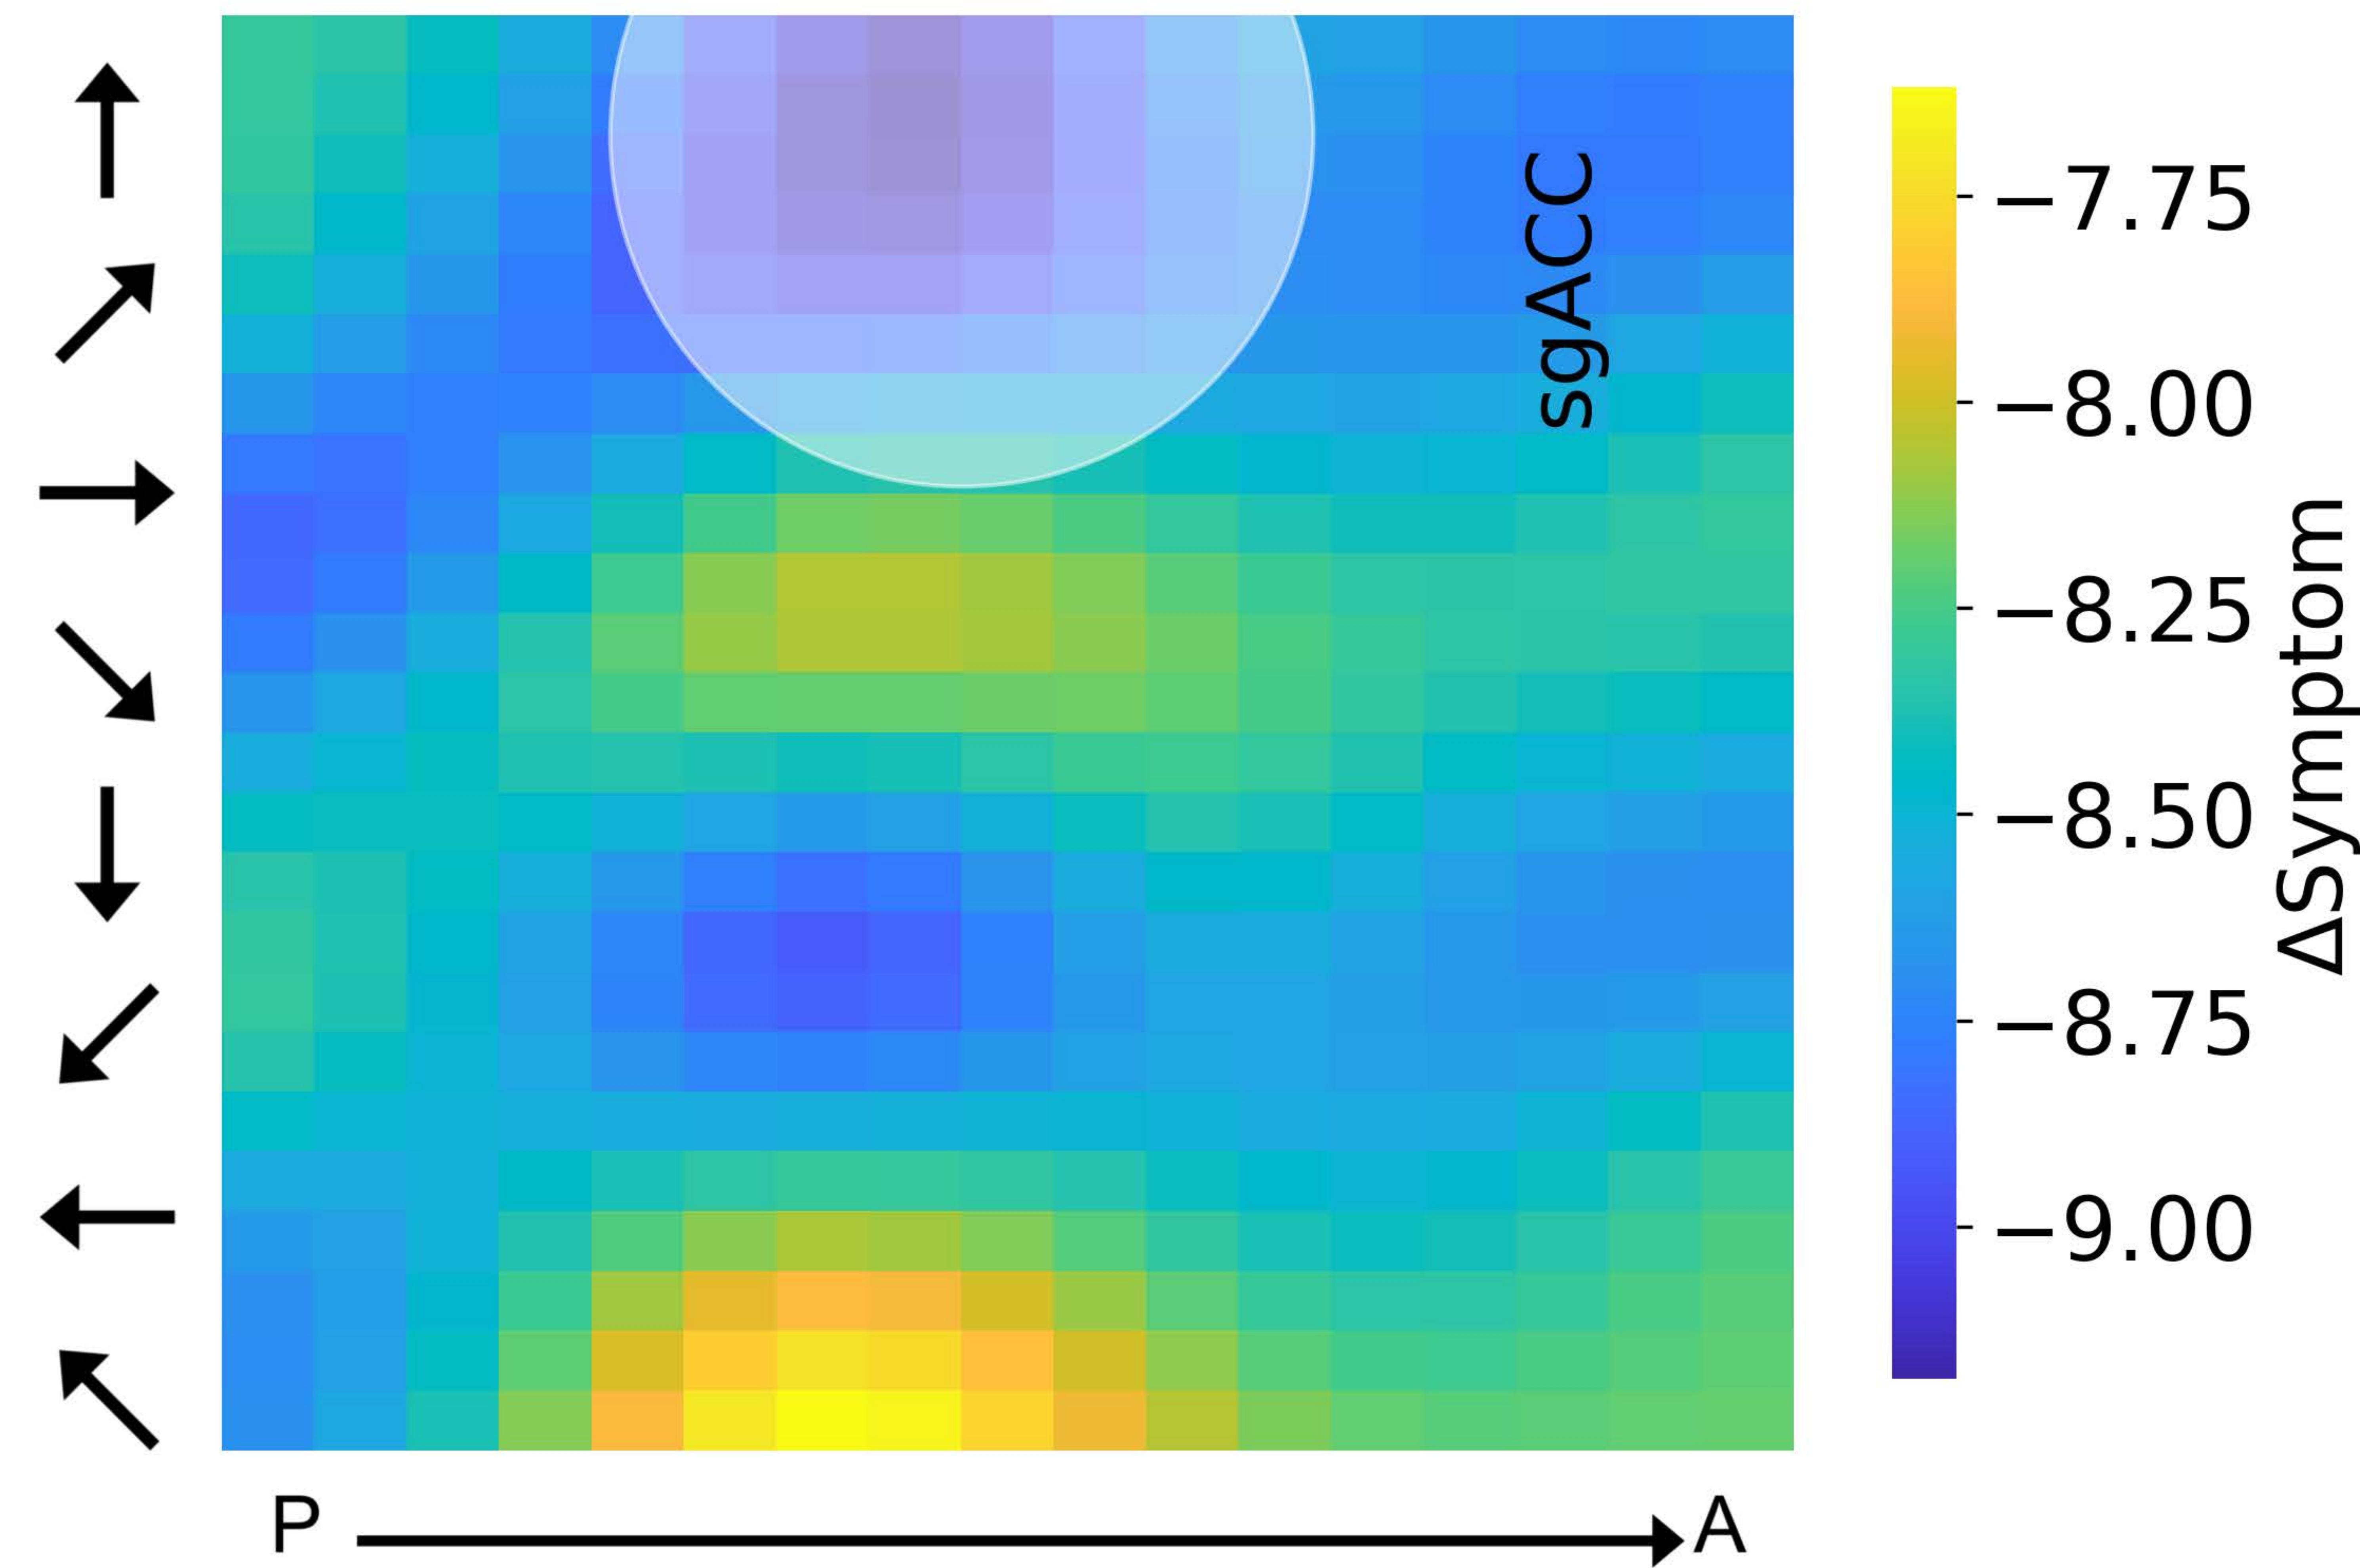



# NDARHZ662EPK\_madr\_left\_dlpfc

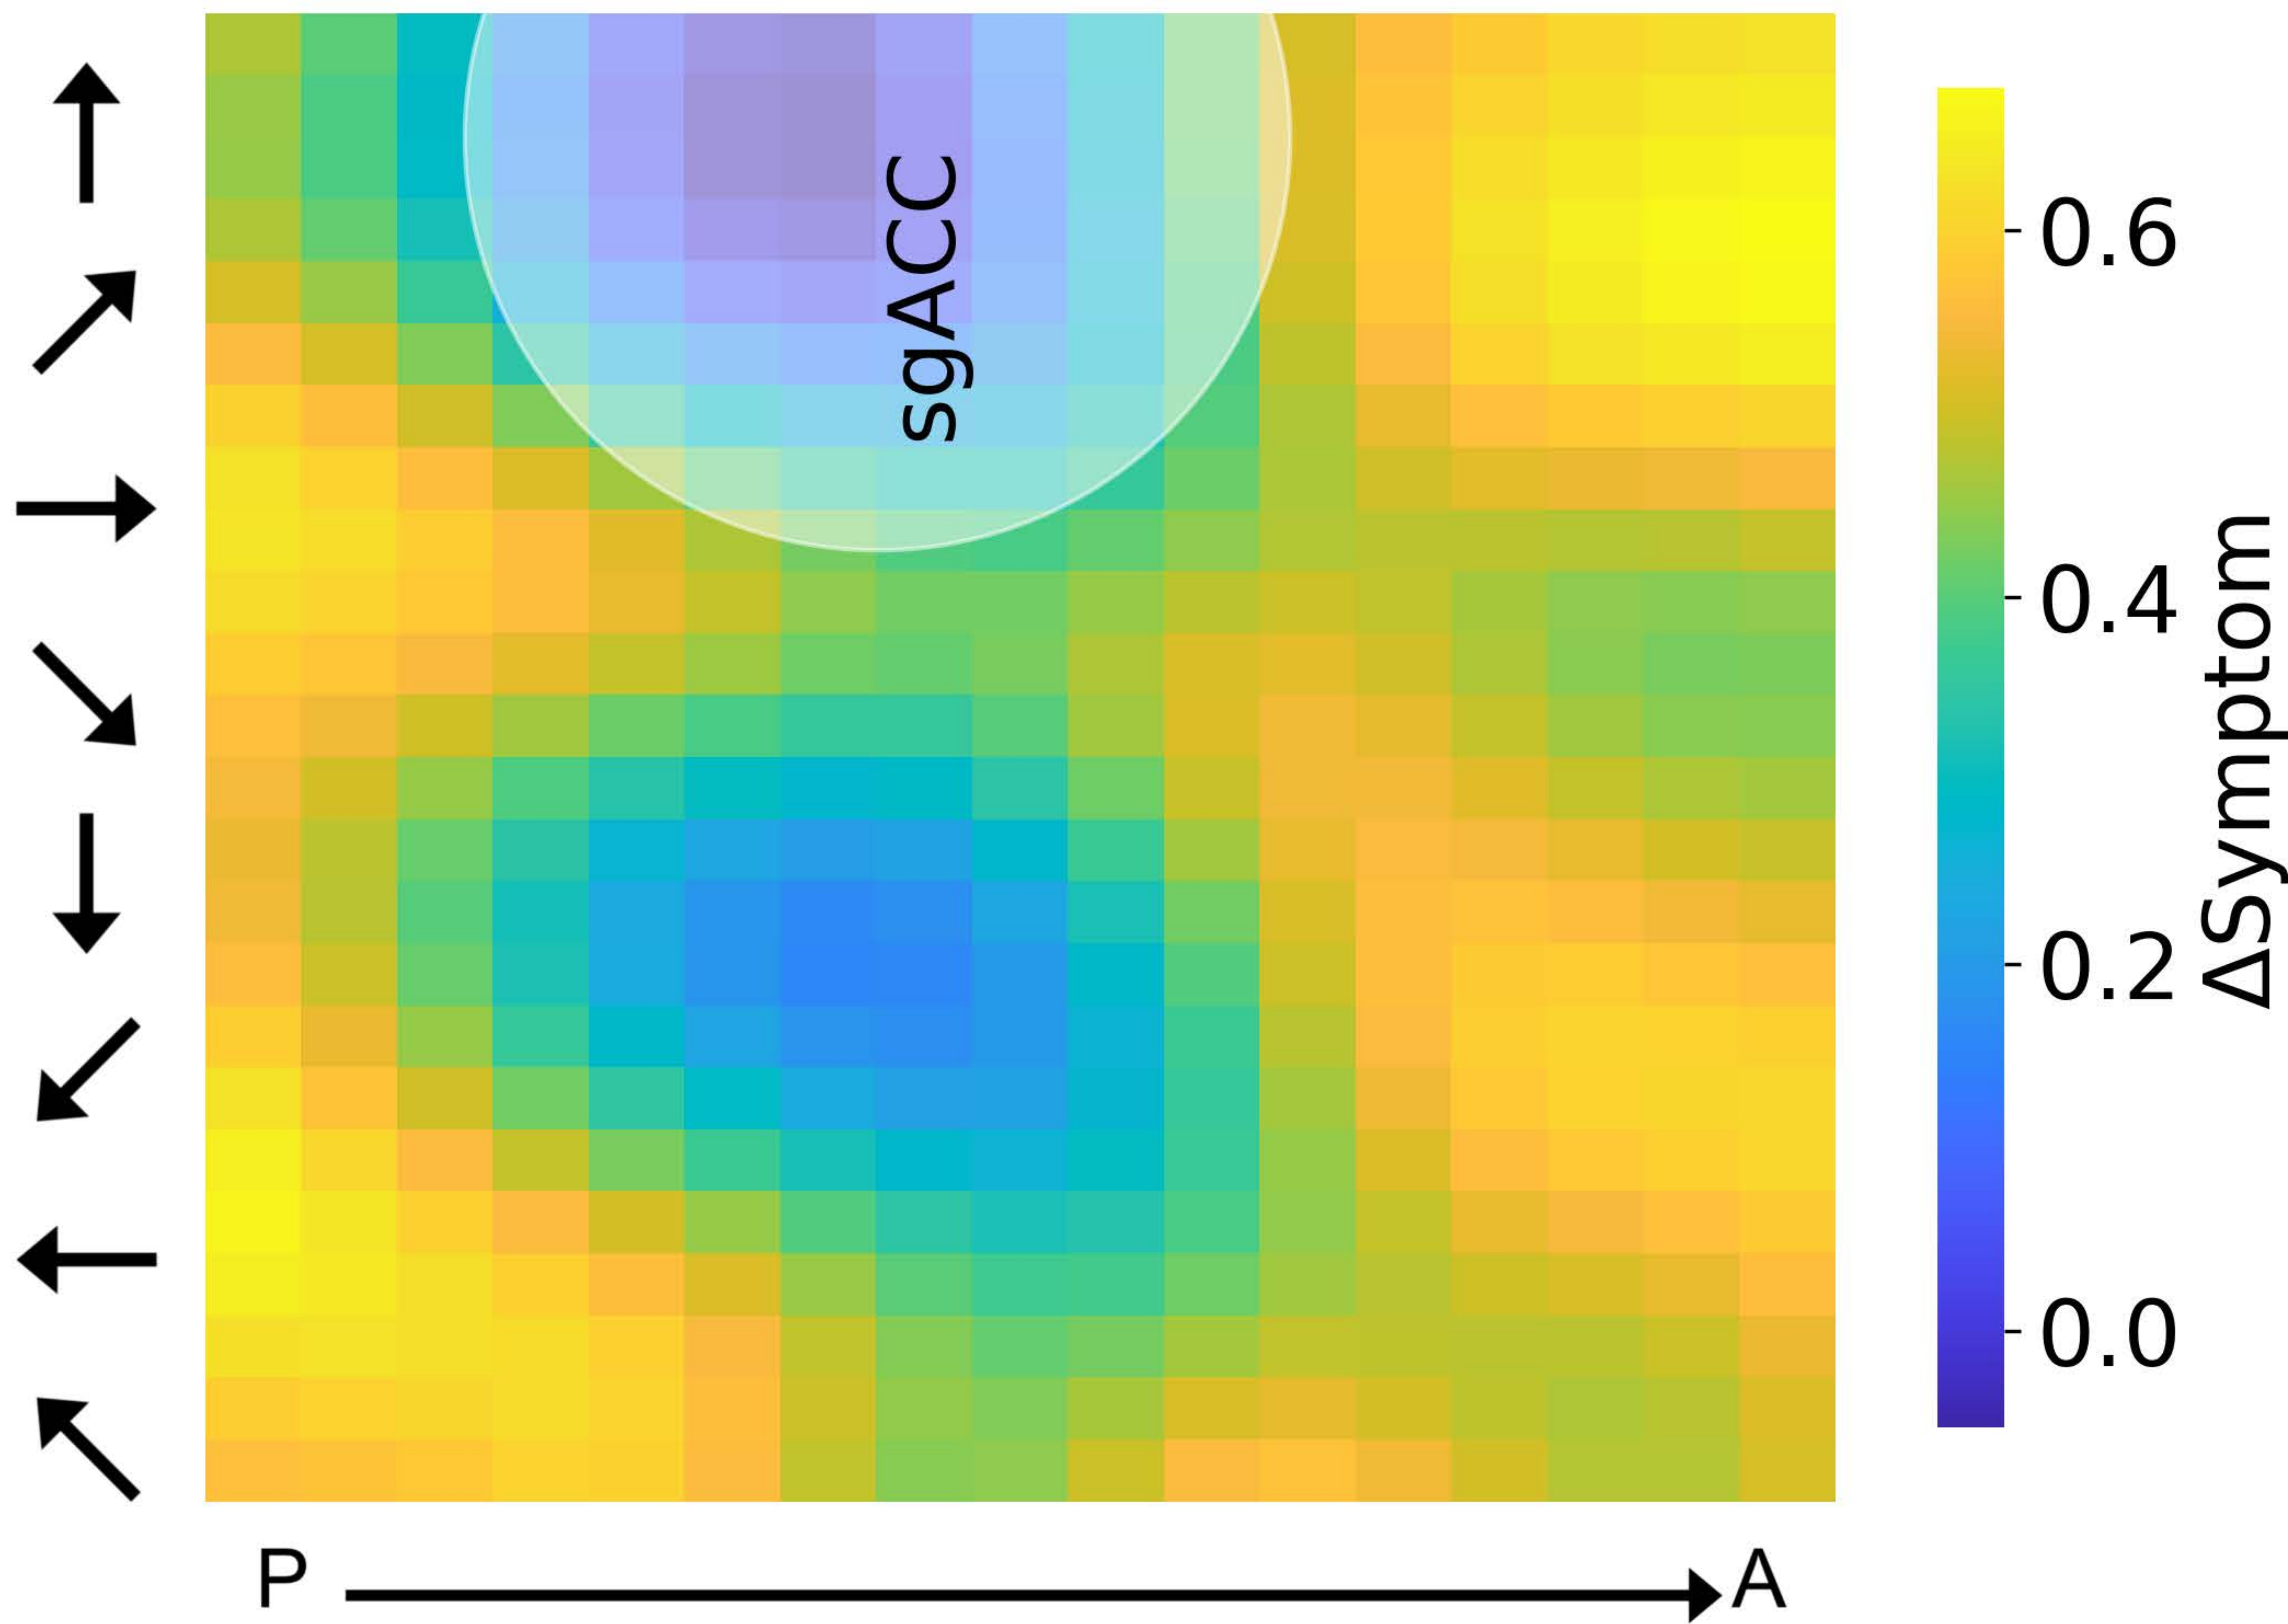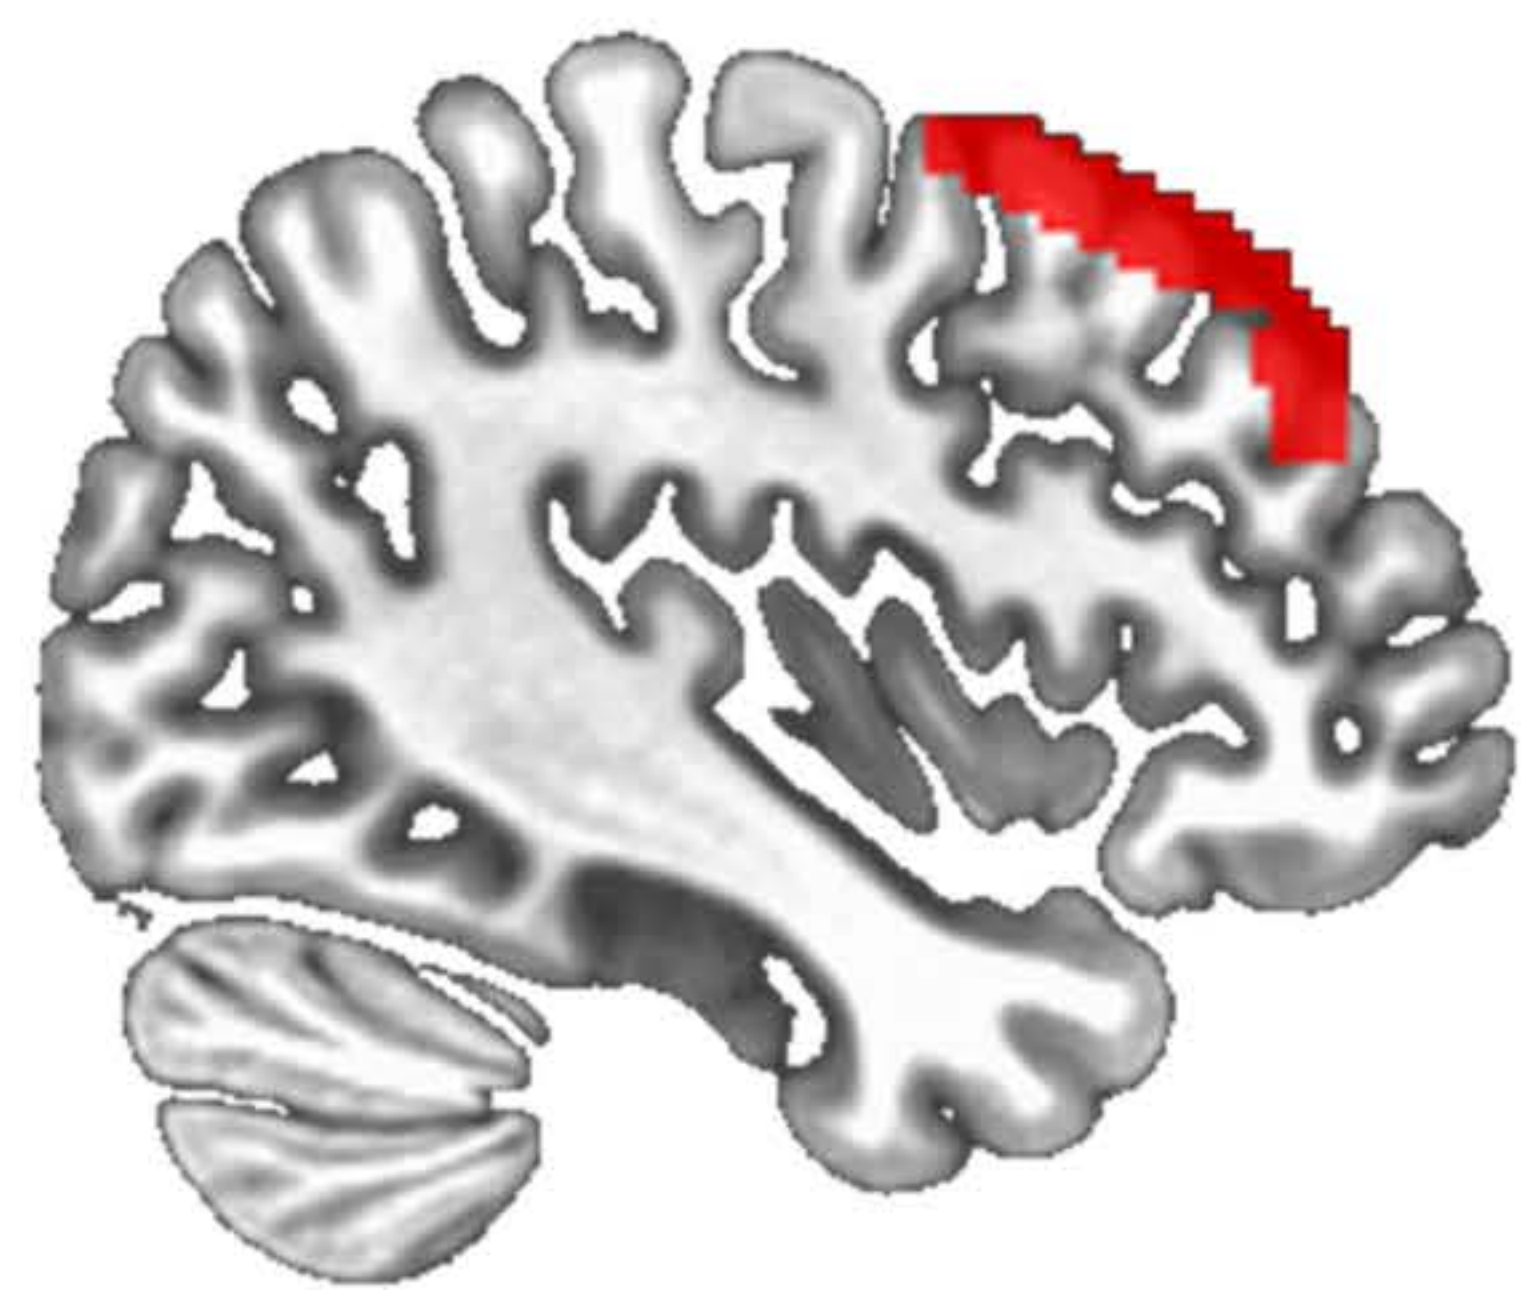



# INDARJD271PMF\_madrs\_left\_dlpfc

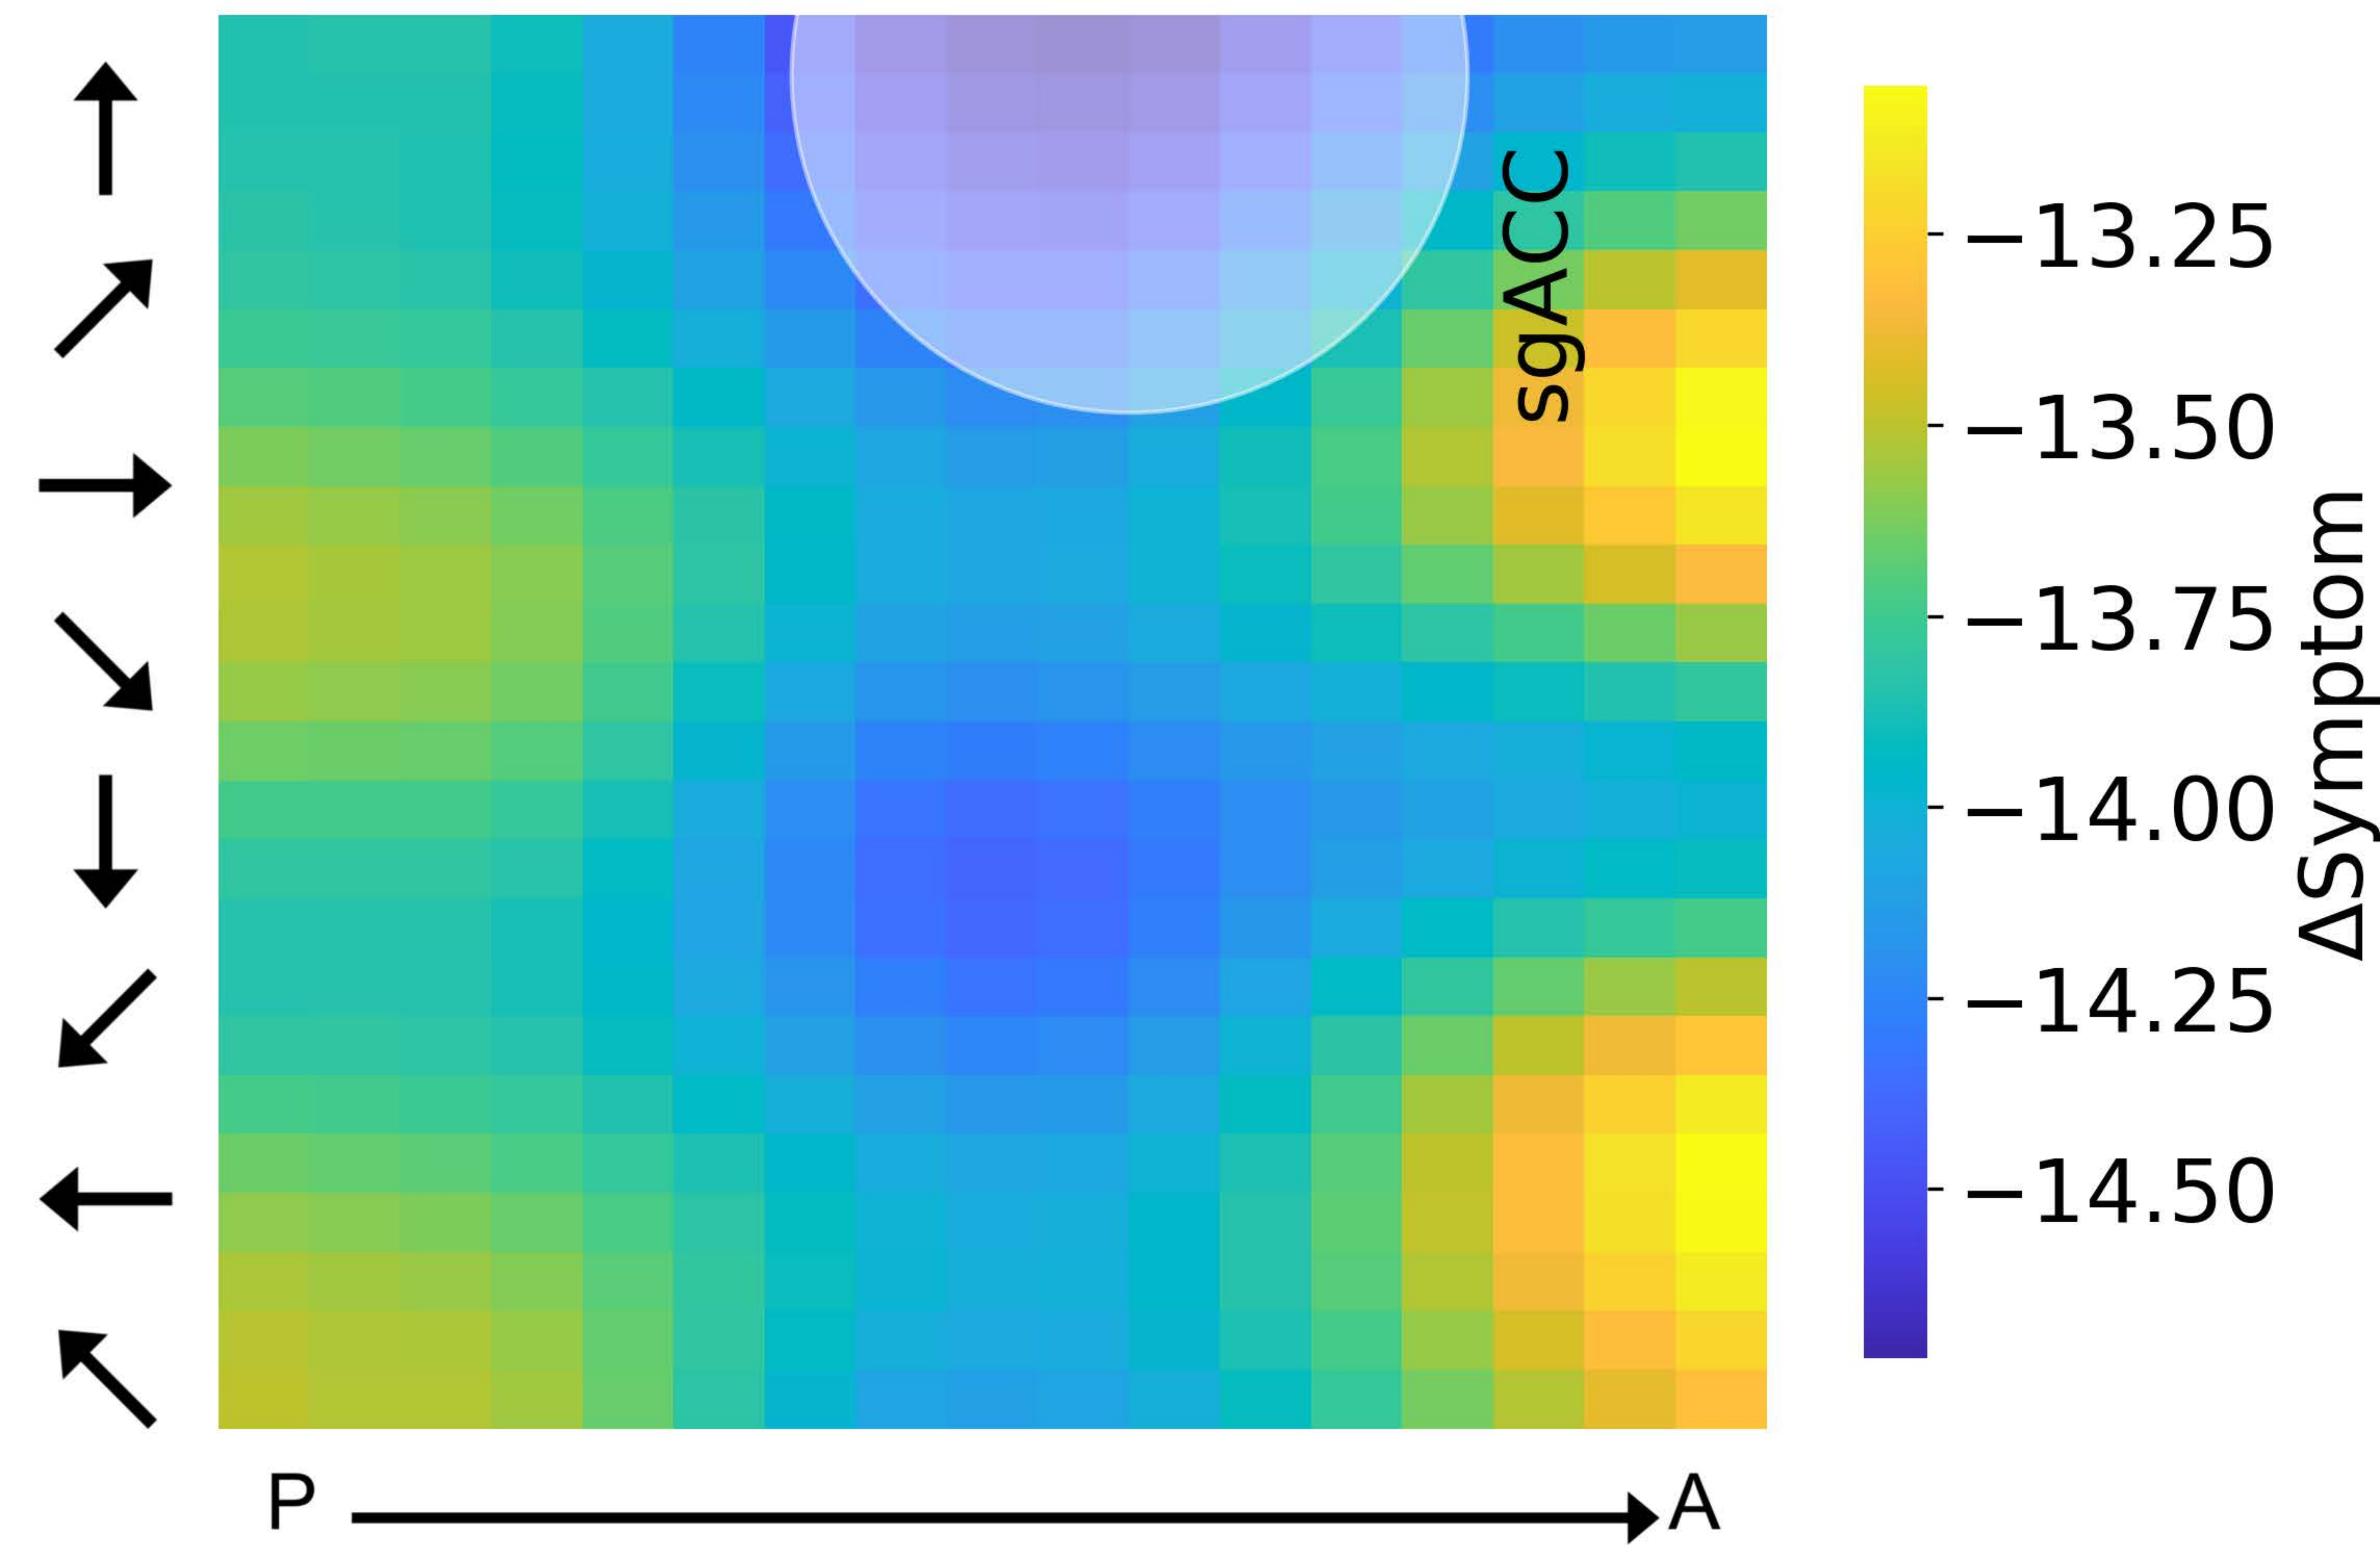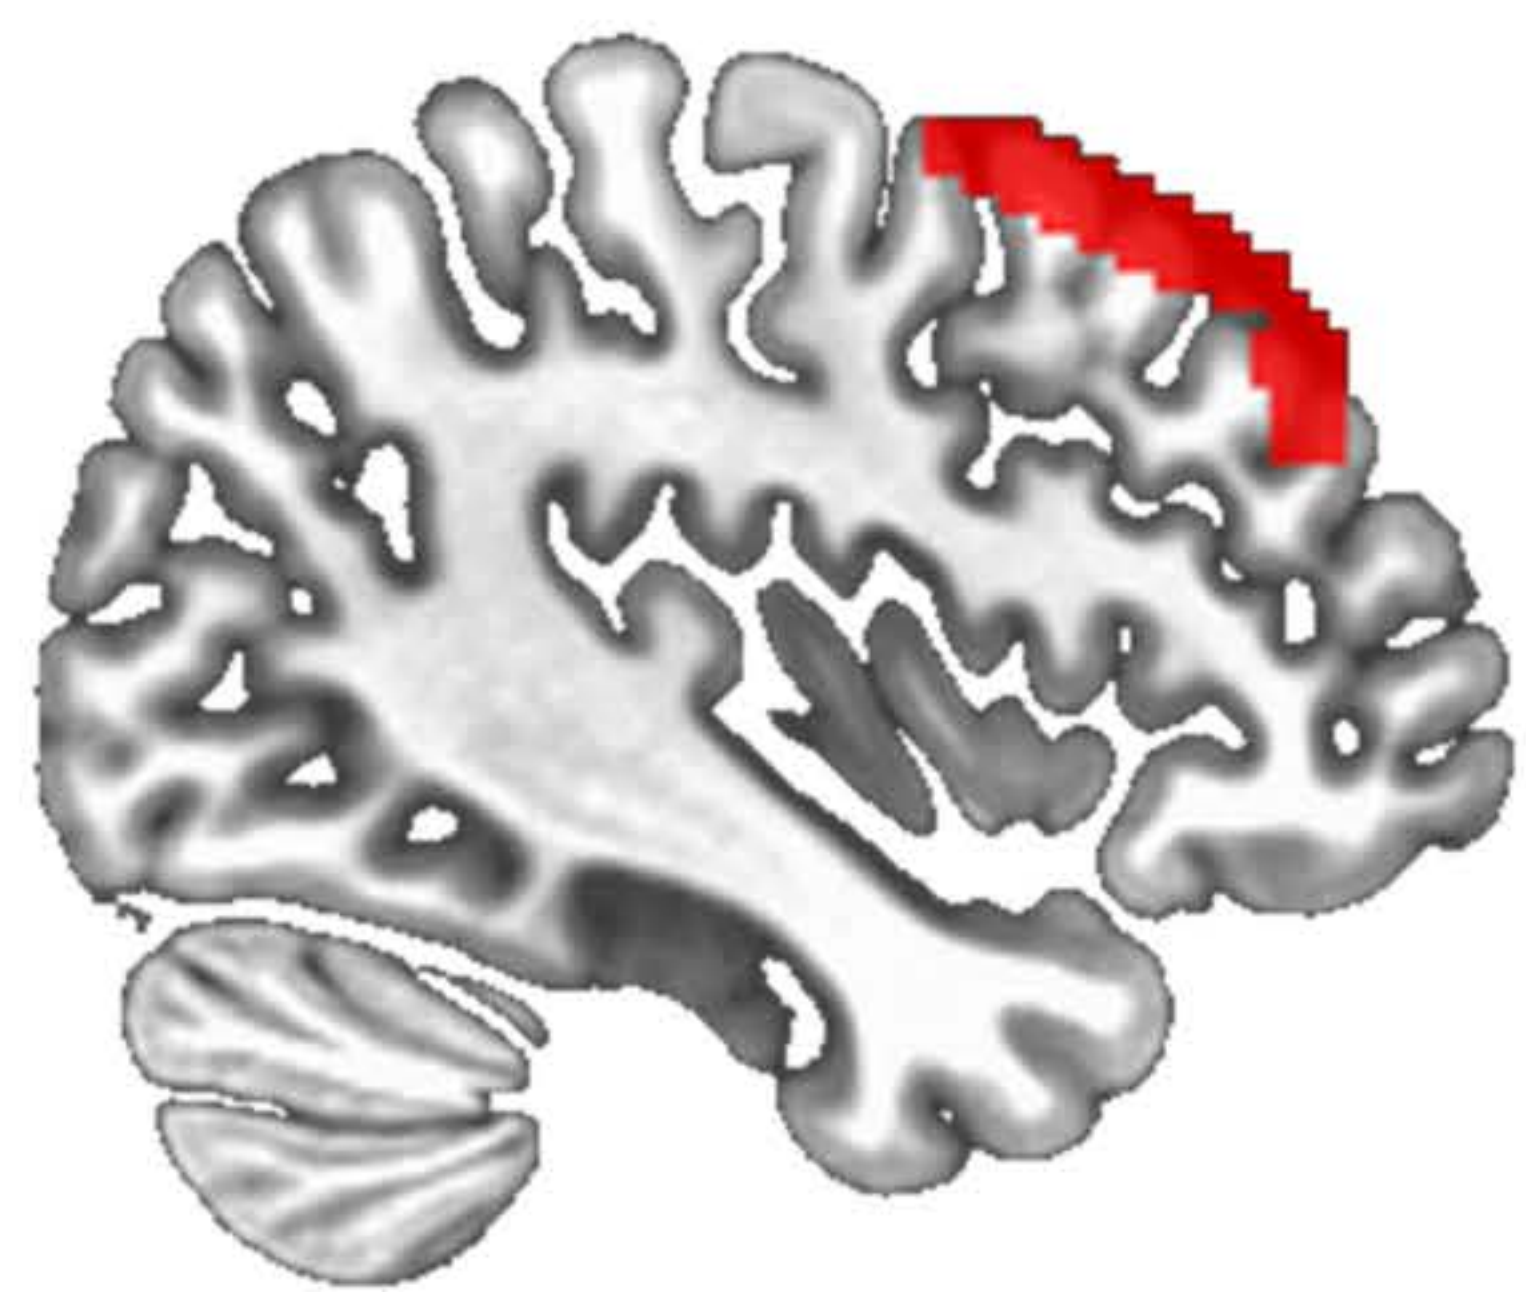



# INDARJD548GTC\_madrs\_left\_dlpfc

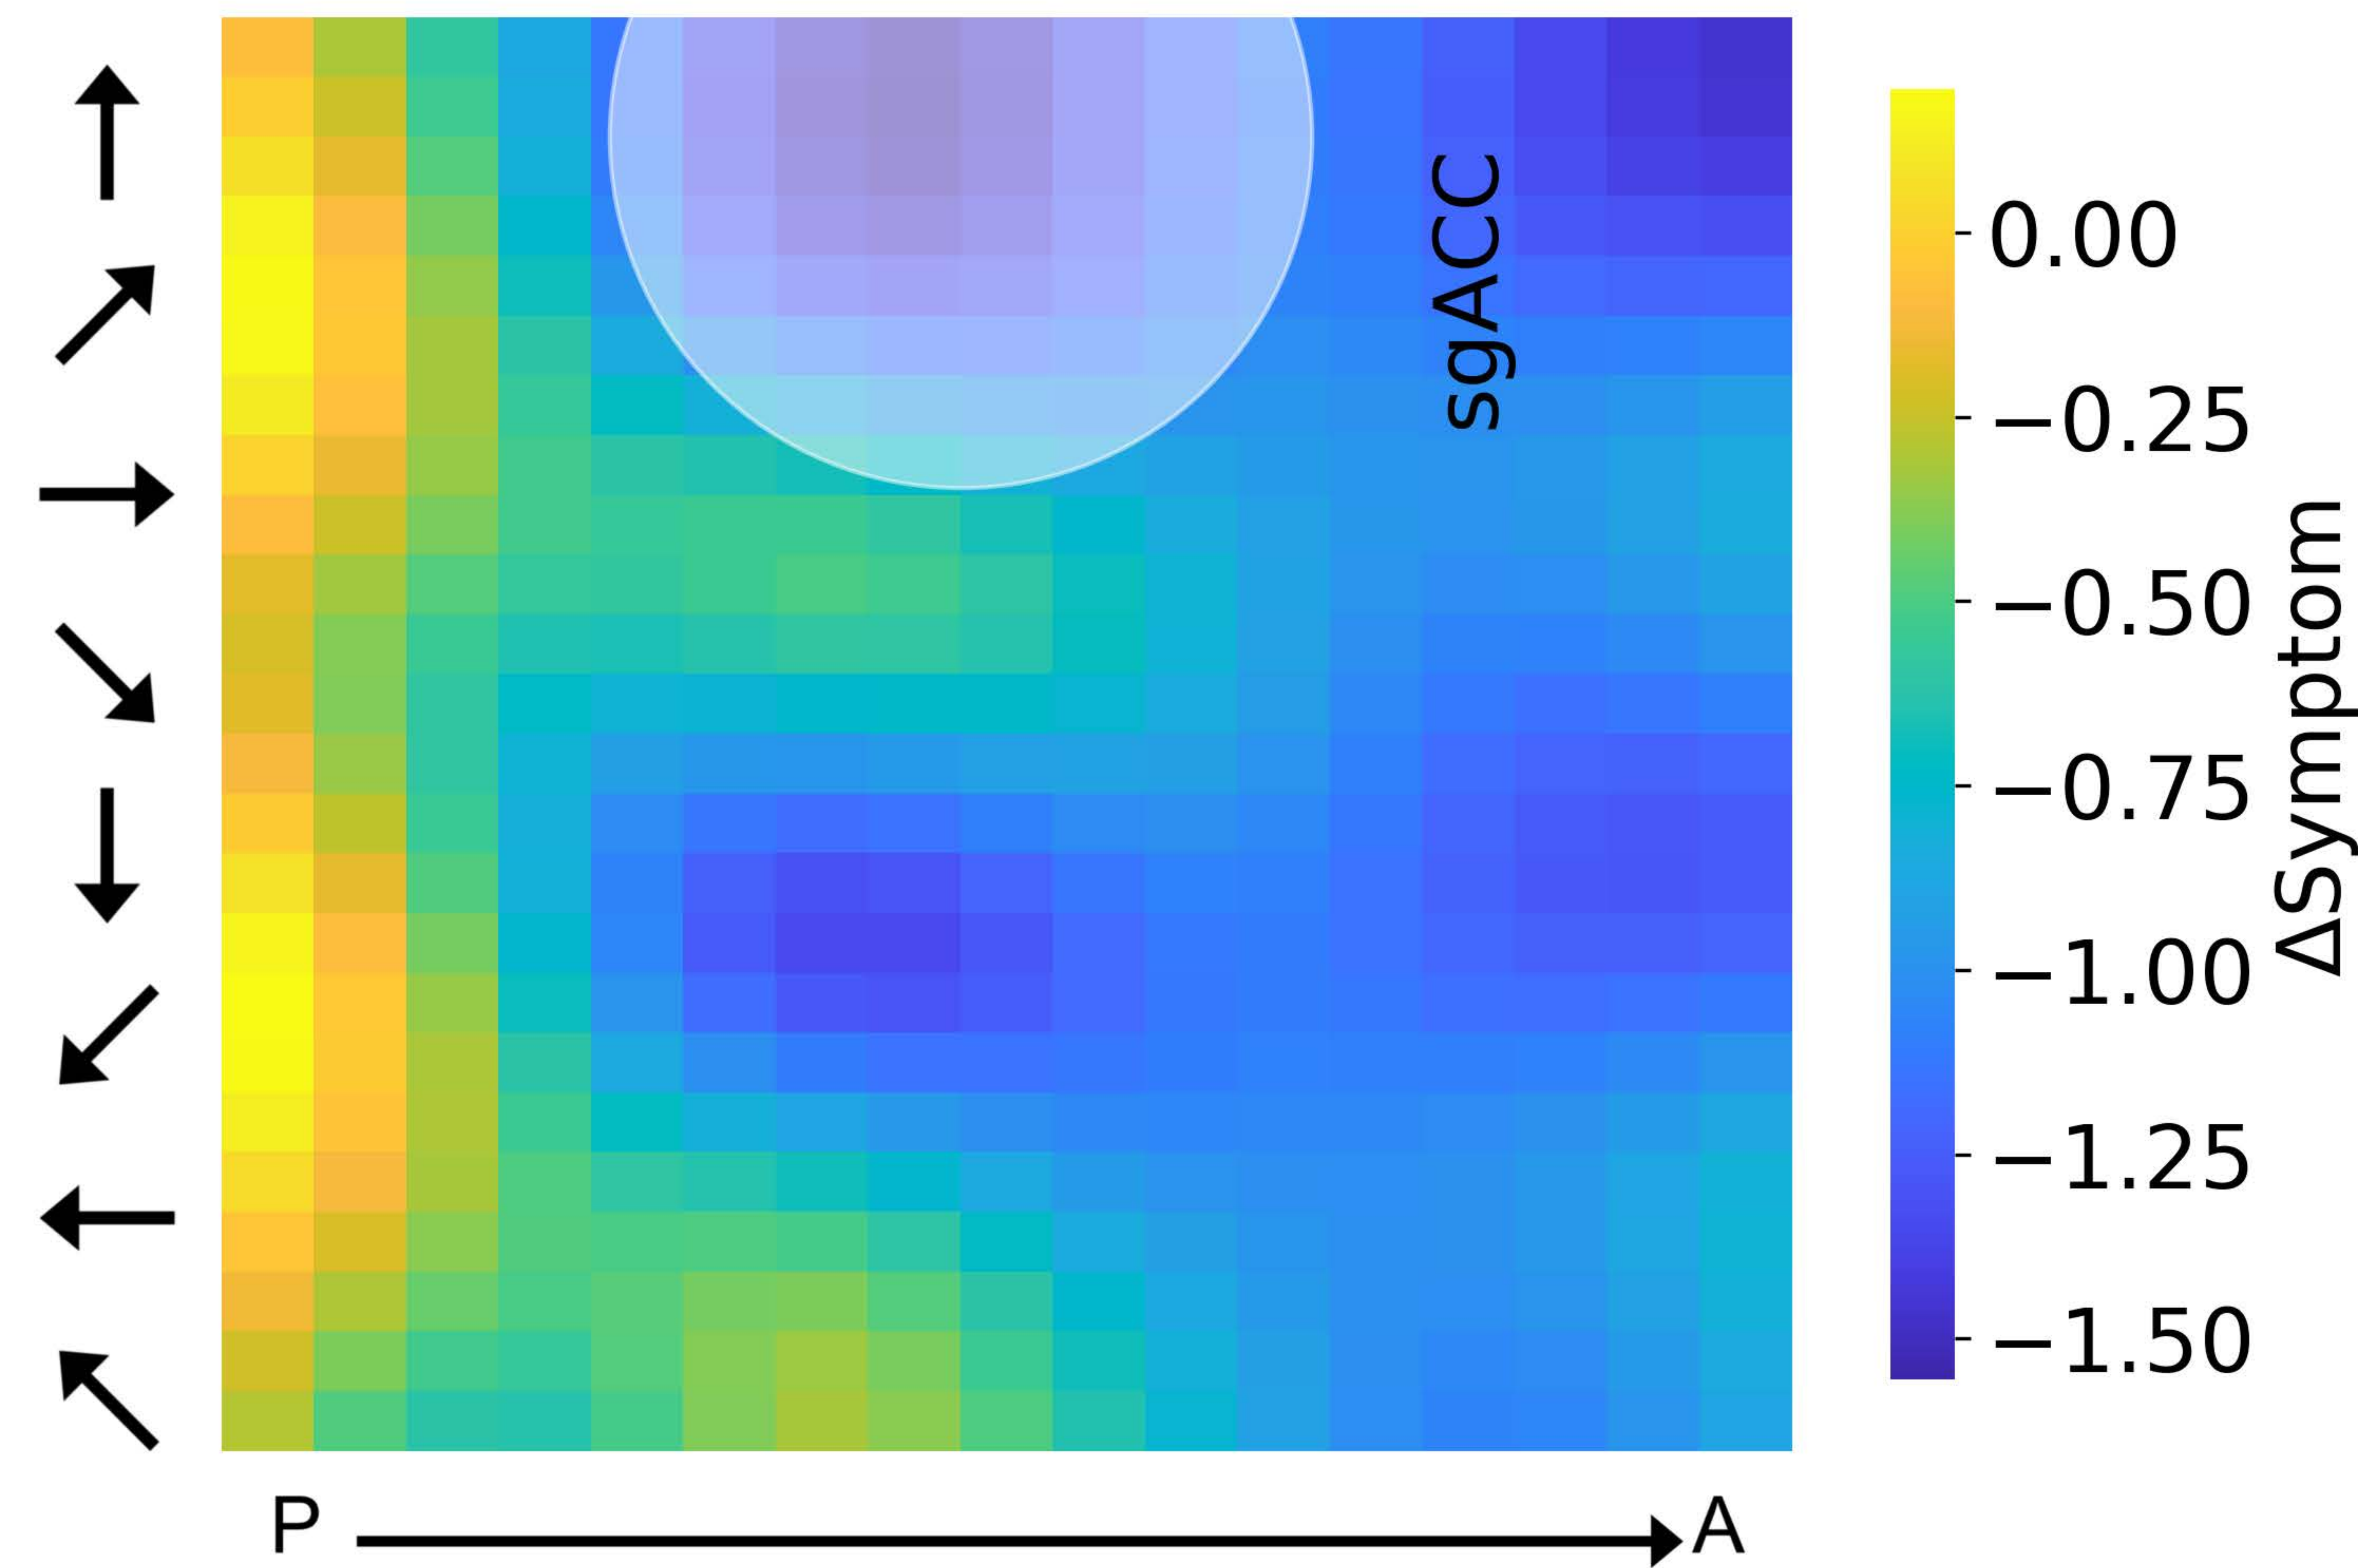



# NDARJF993NV1\_madrs\_left\_dlpfc

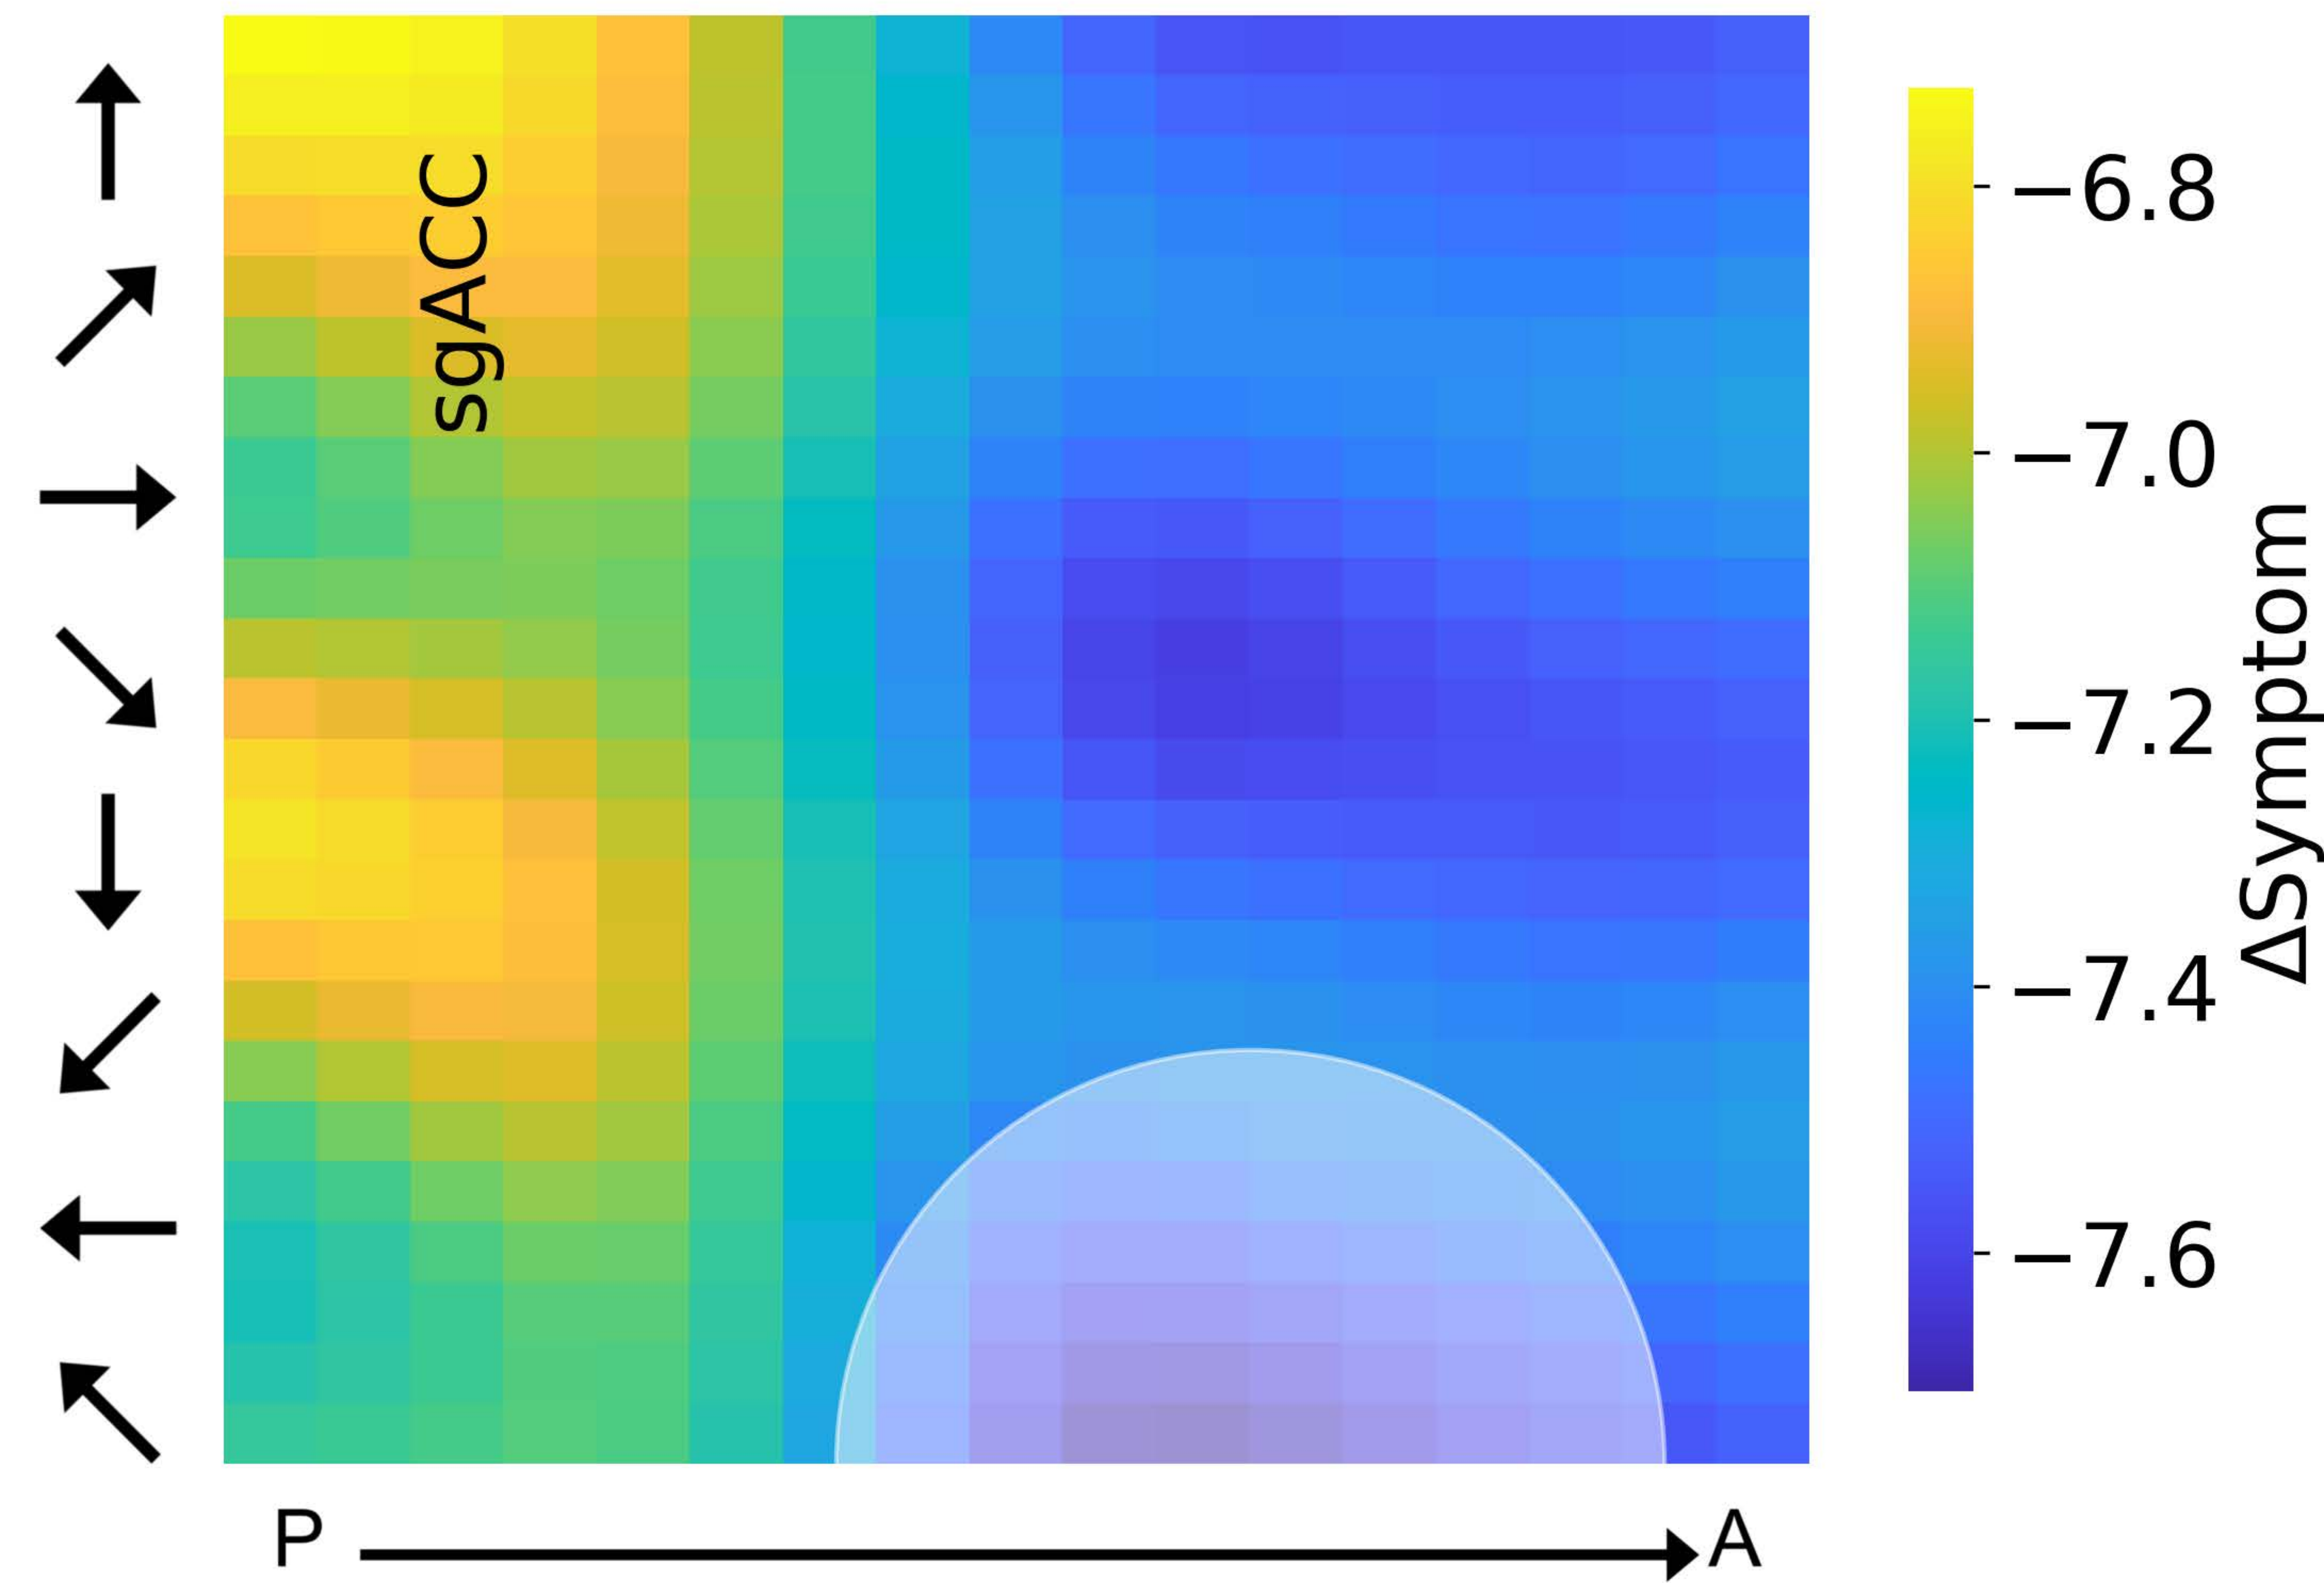



# NDARJH406WC9\_madrs\_left\_dlpfc

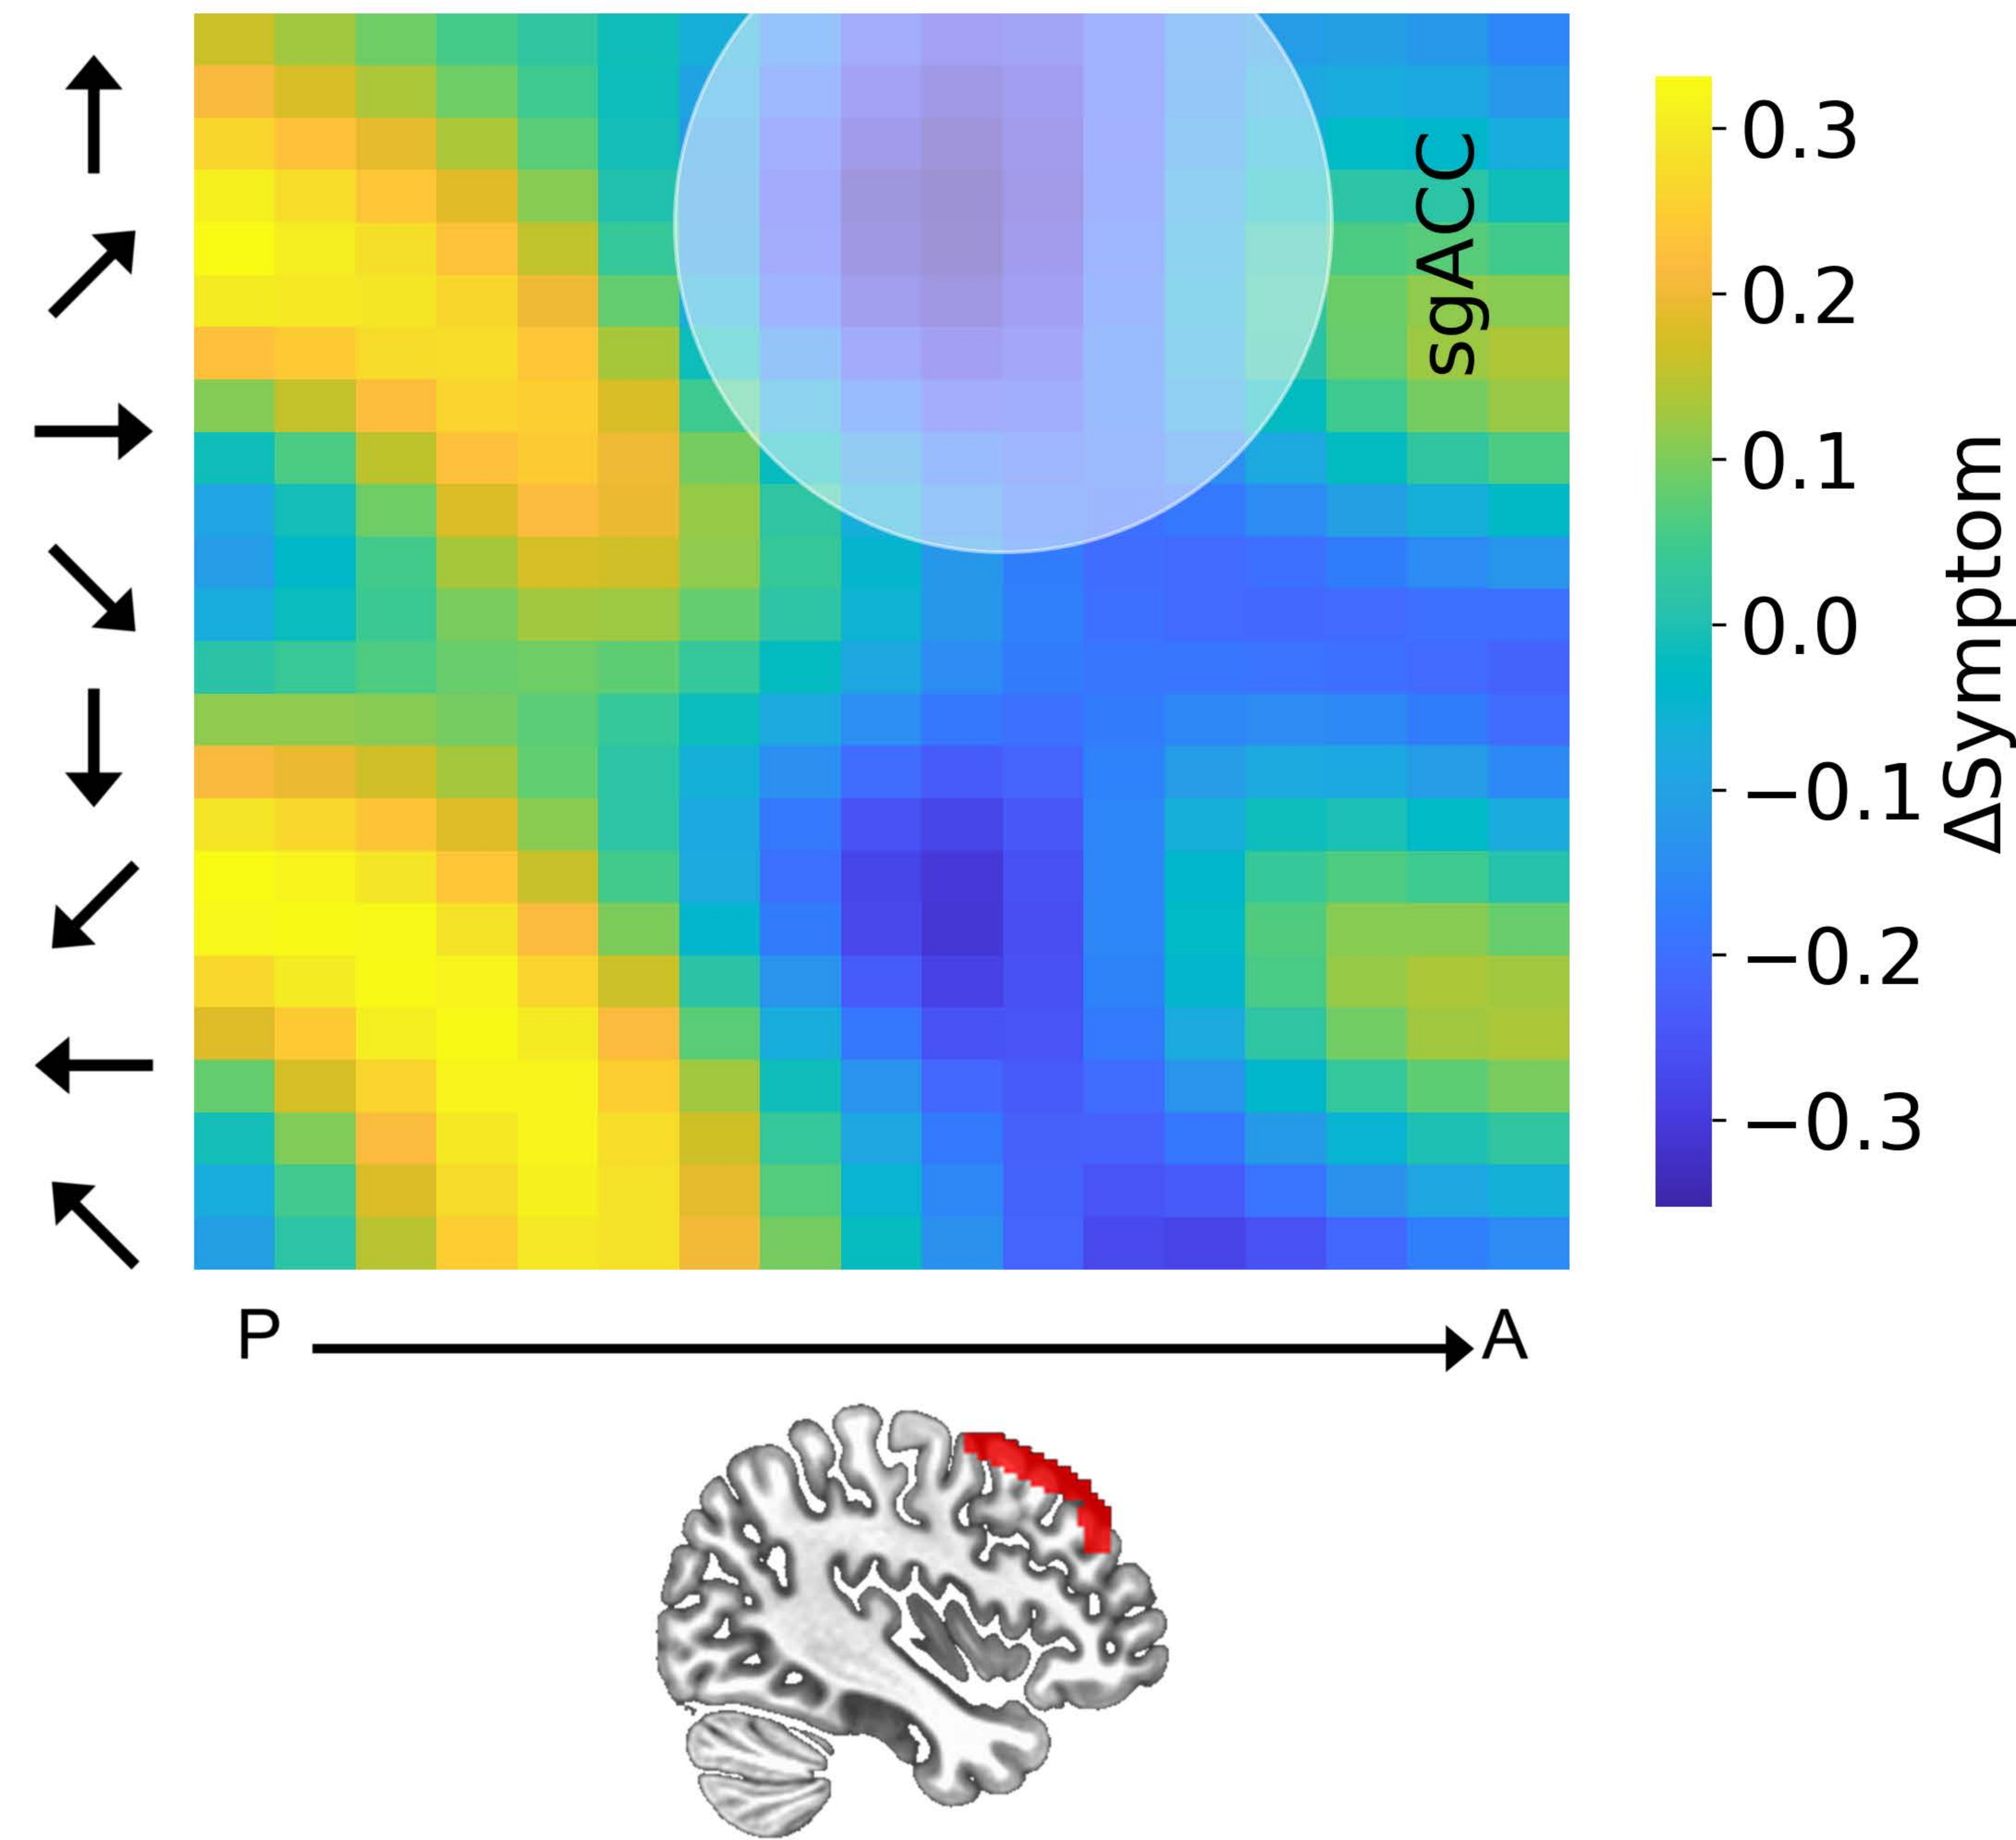



# NDARJX575DVK\_madrs\_left\_dlpfc

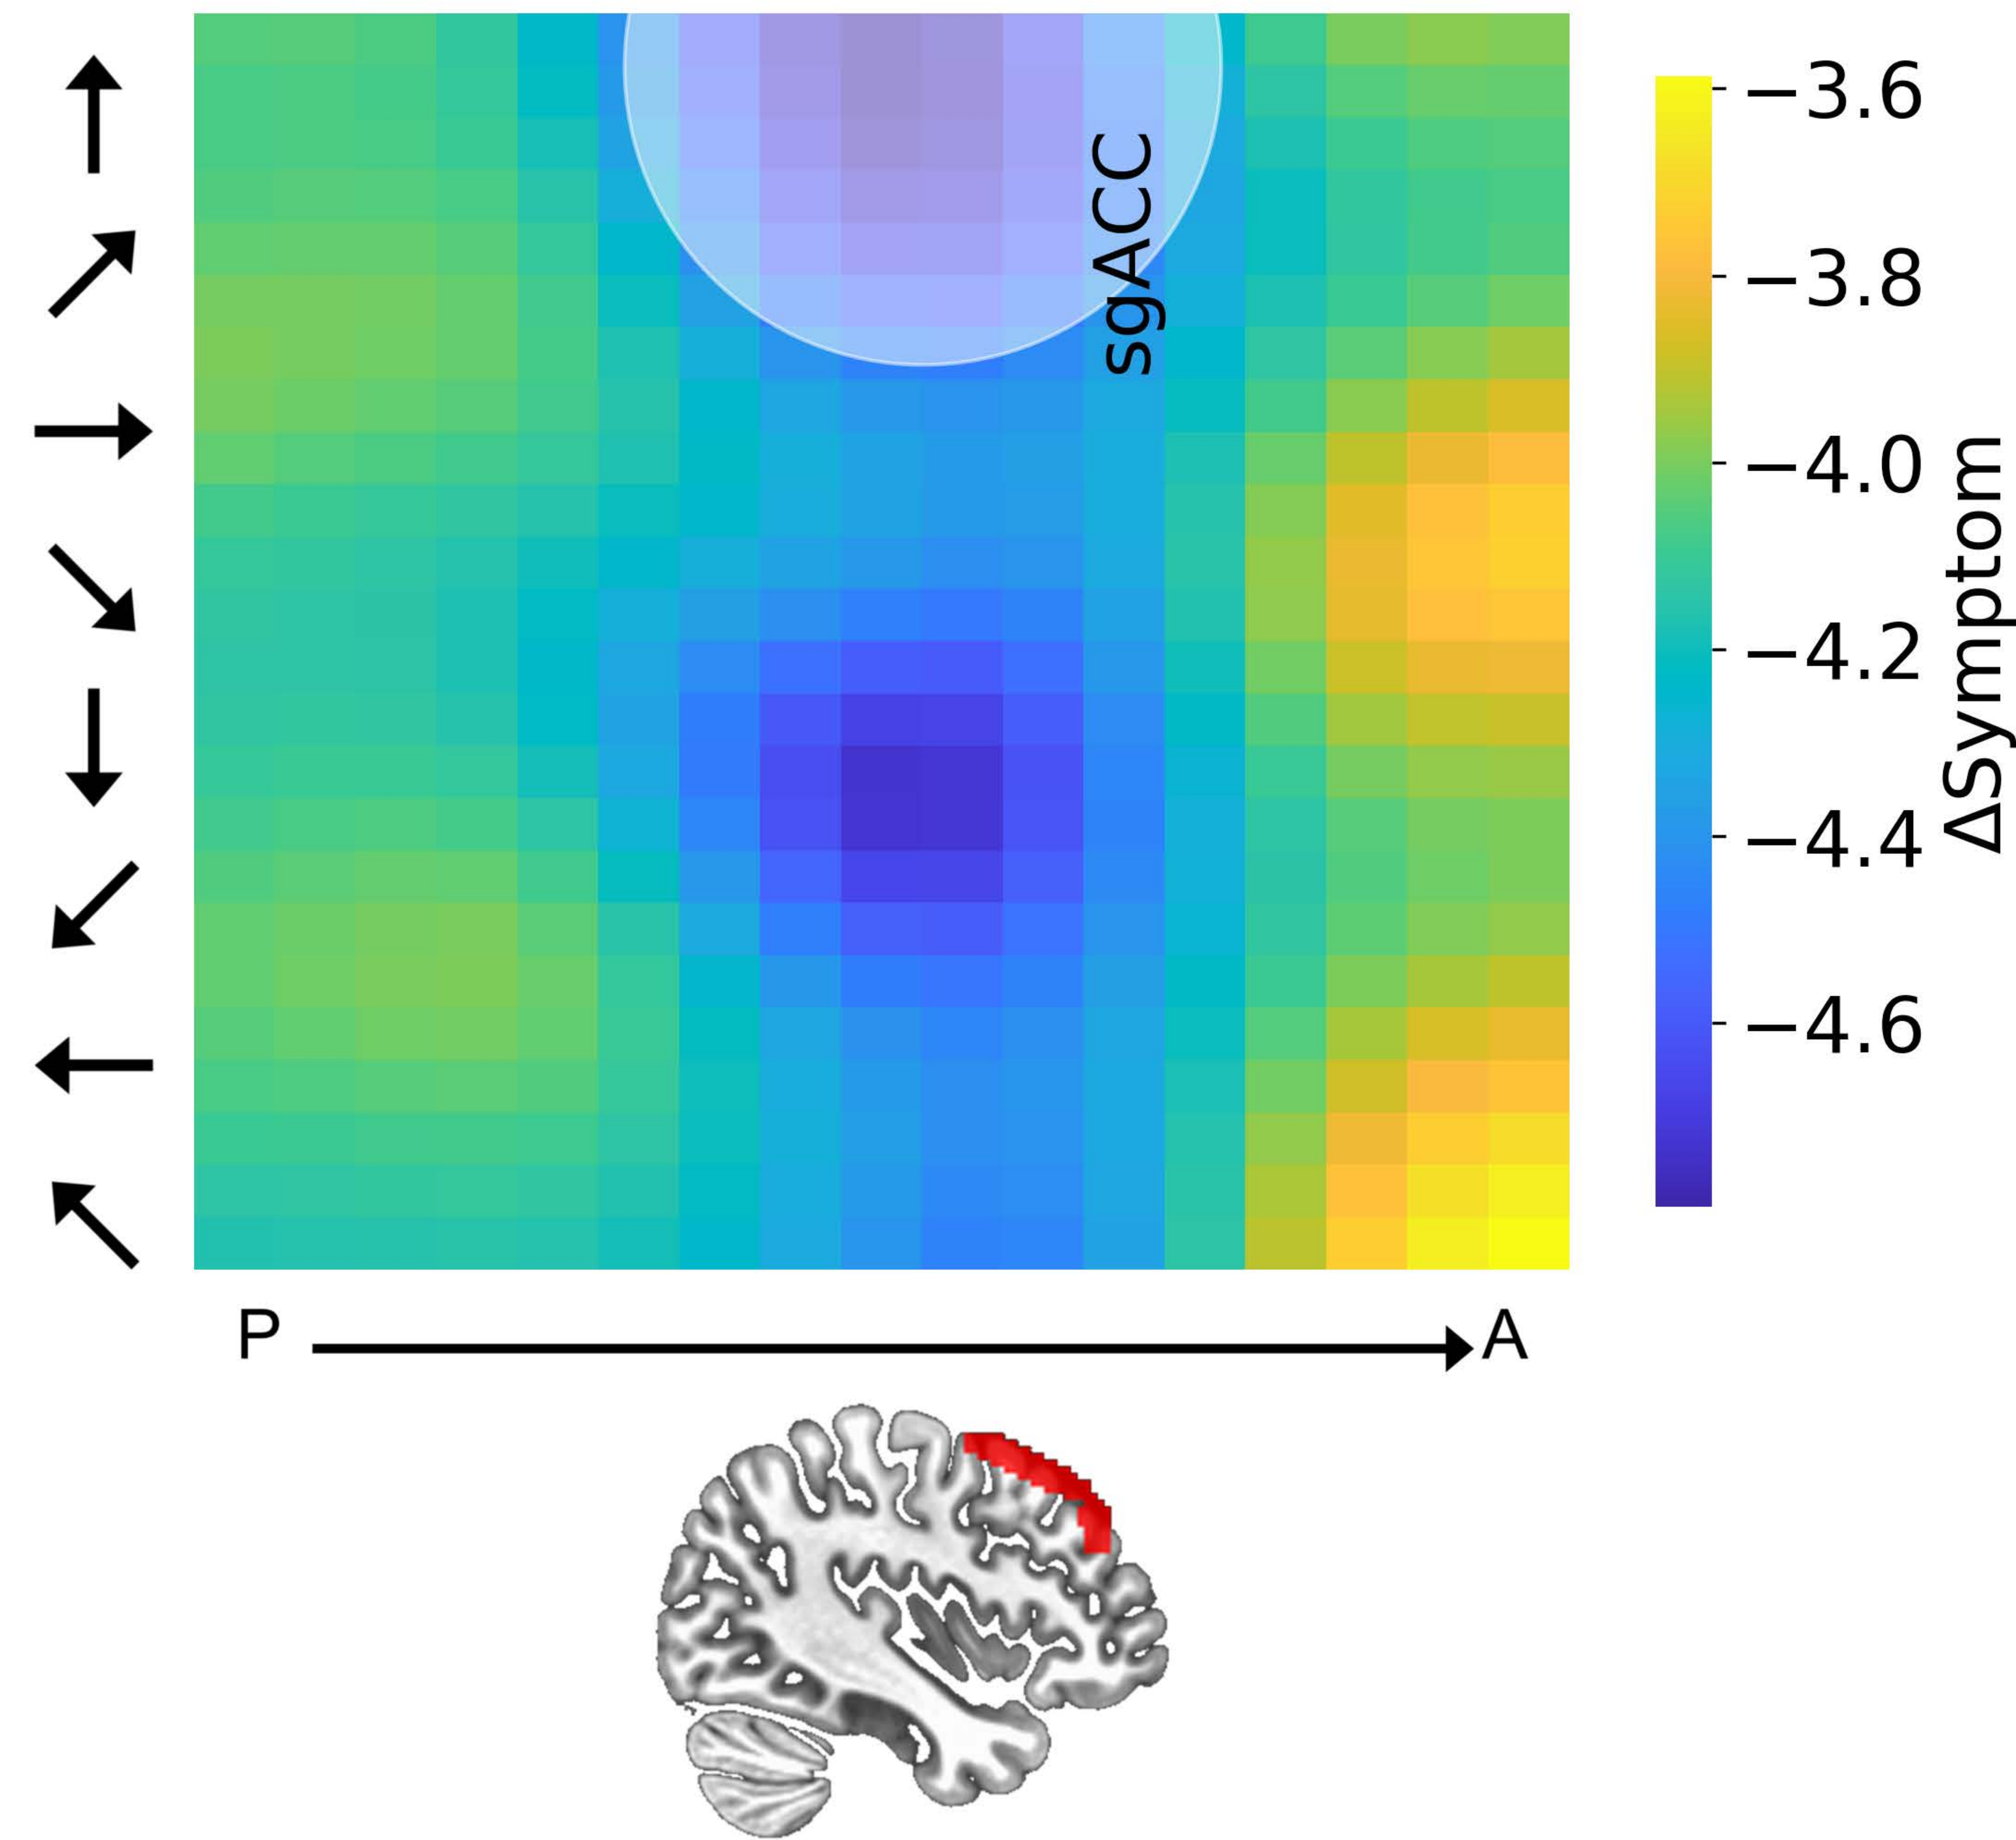



# NDARJY042TLY\_madrs\_left\_dlpfc

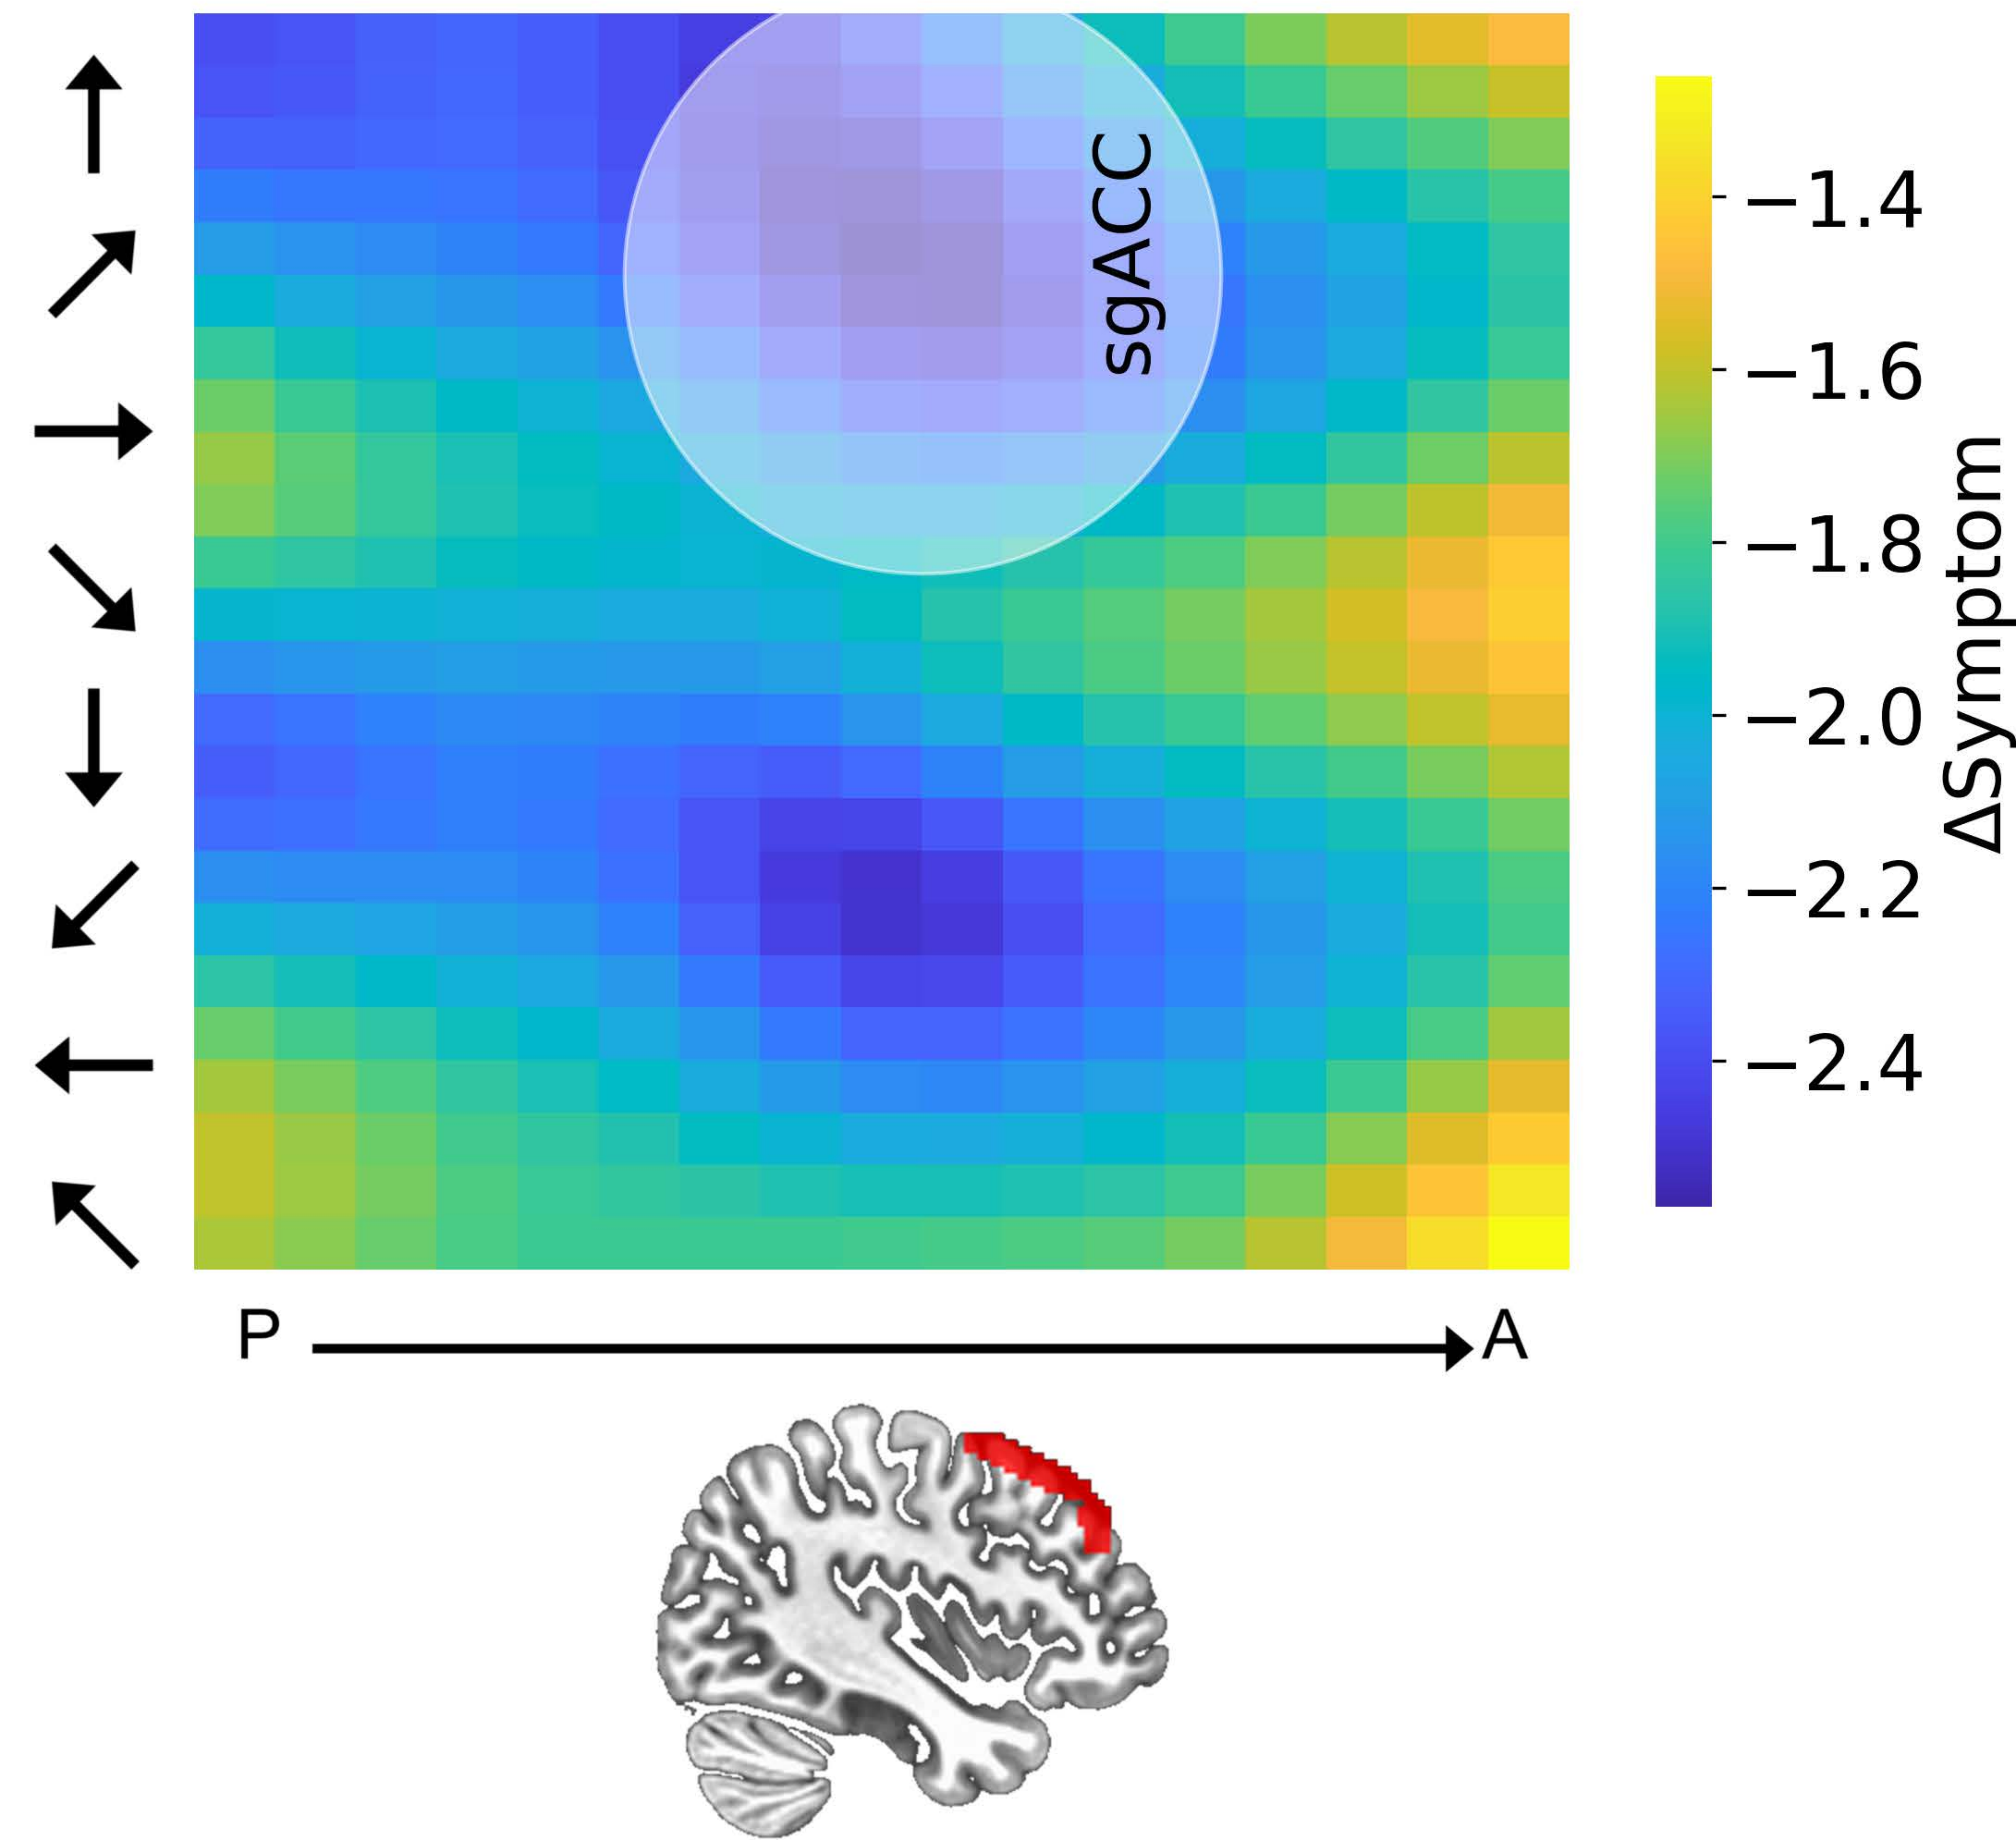



# NDARKK212YTX\_madrs\_left\_dlpfc

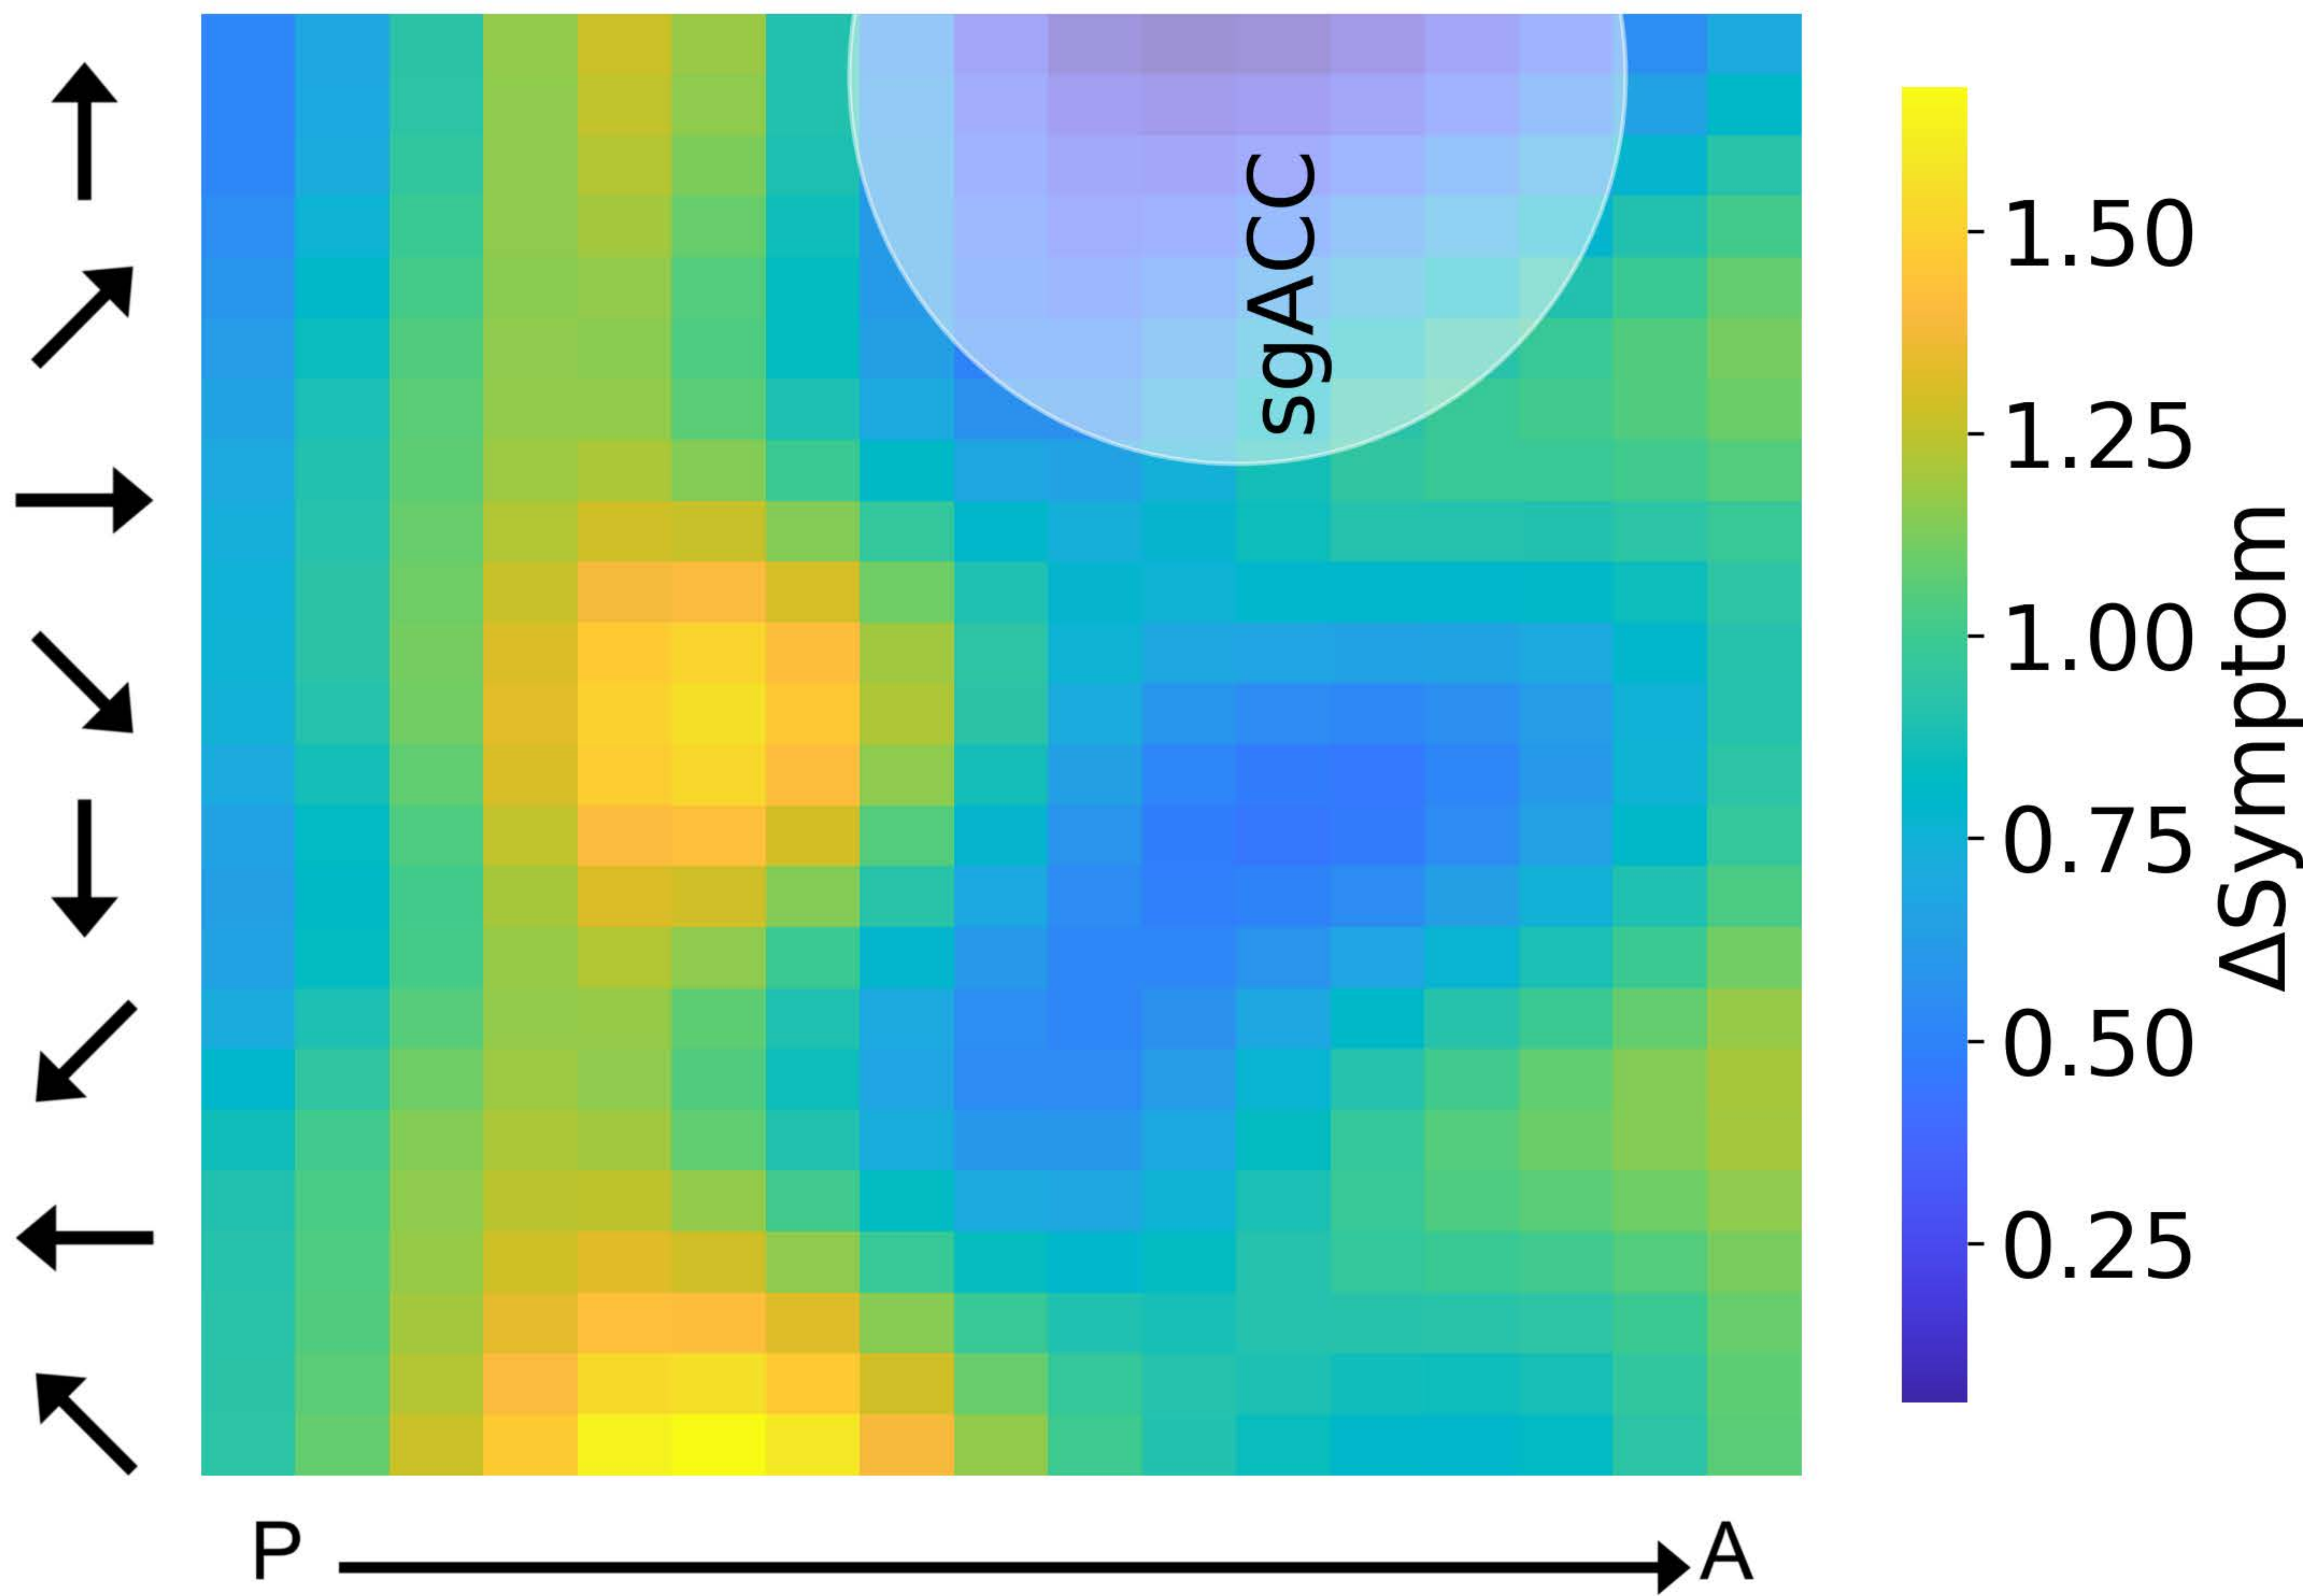



# NDARKM333VX2\_madrs\_left\_dlpfc

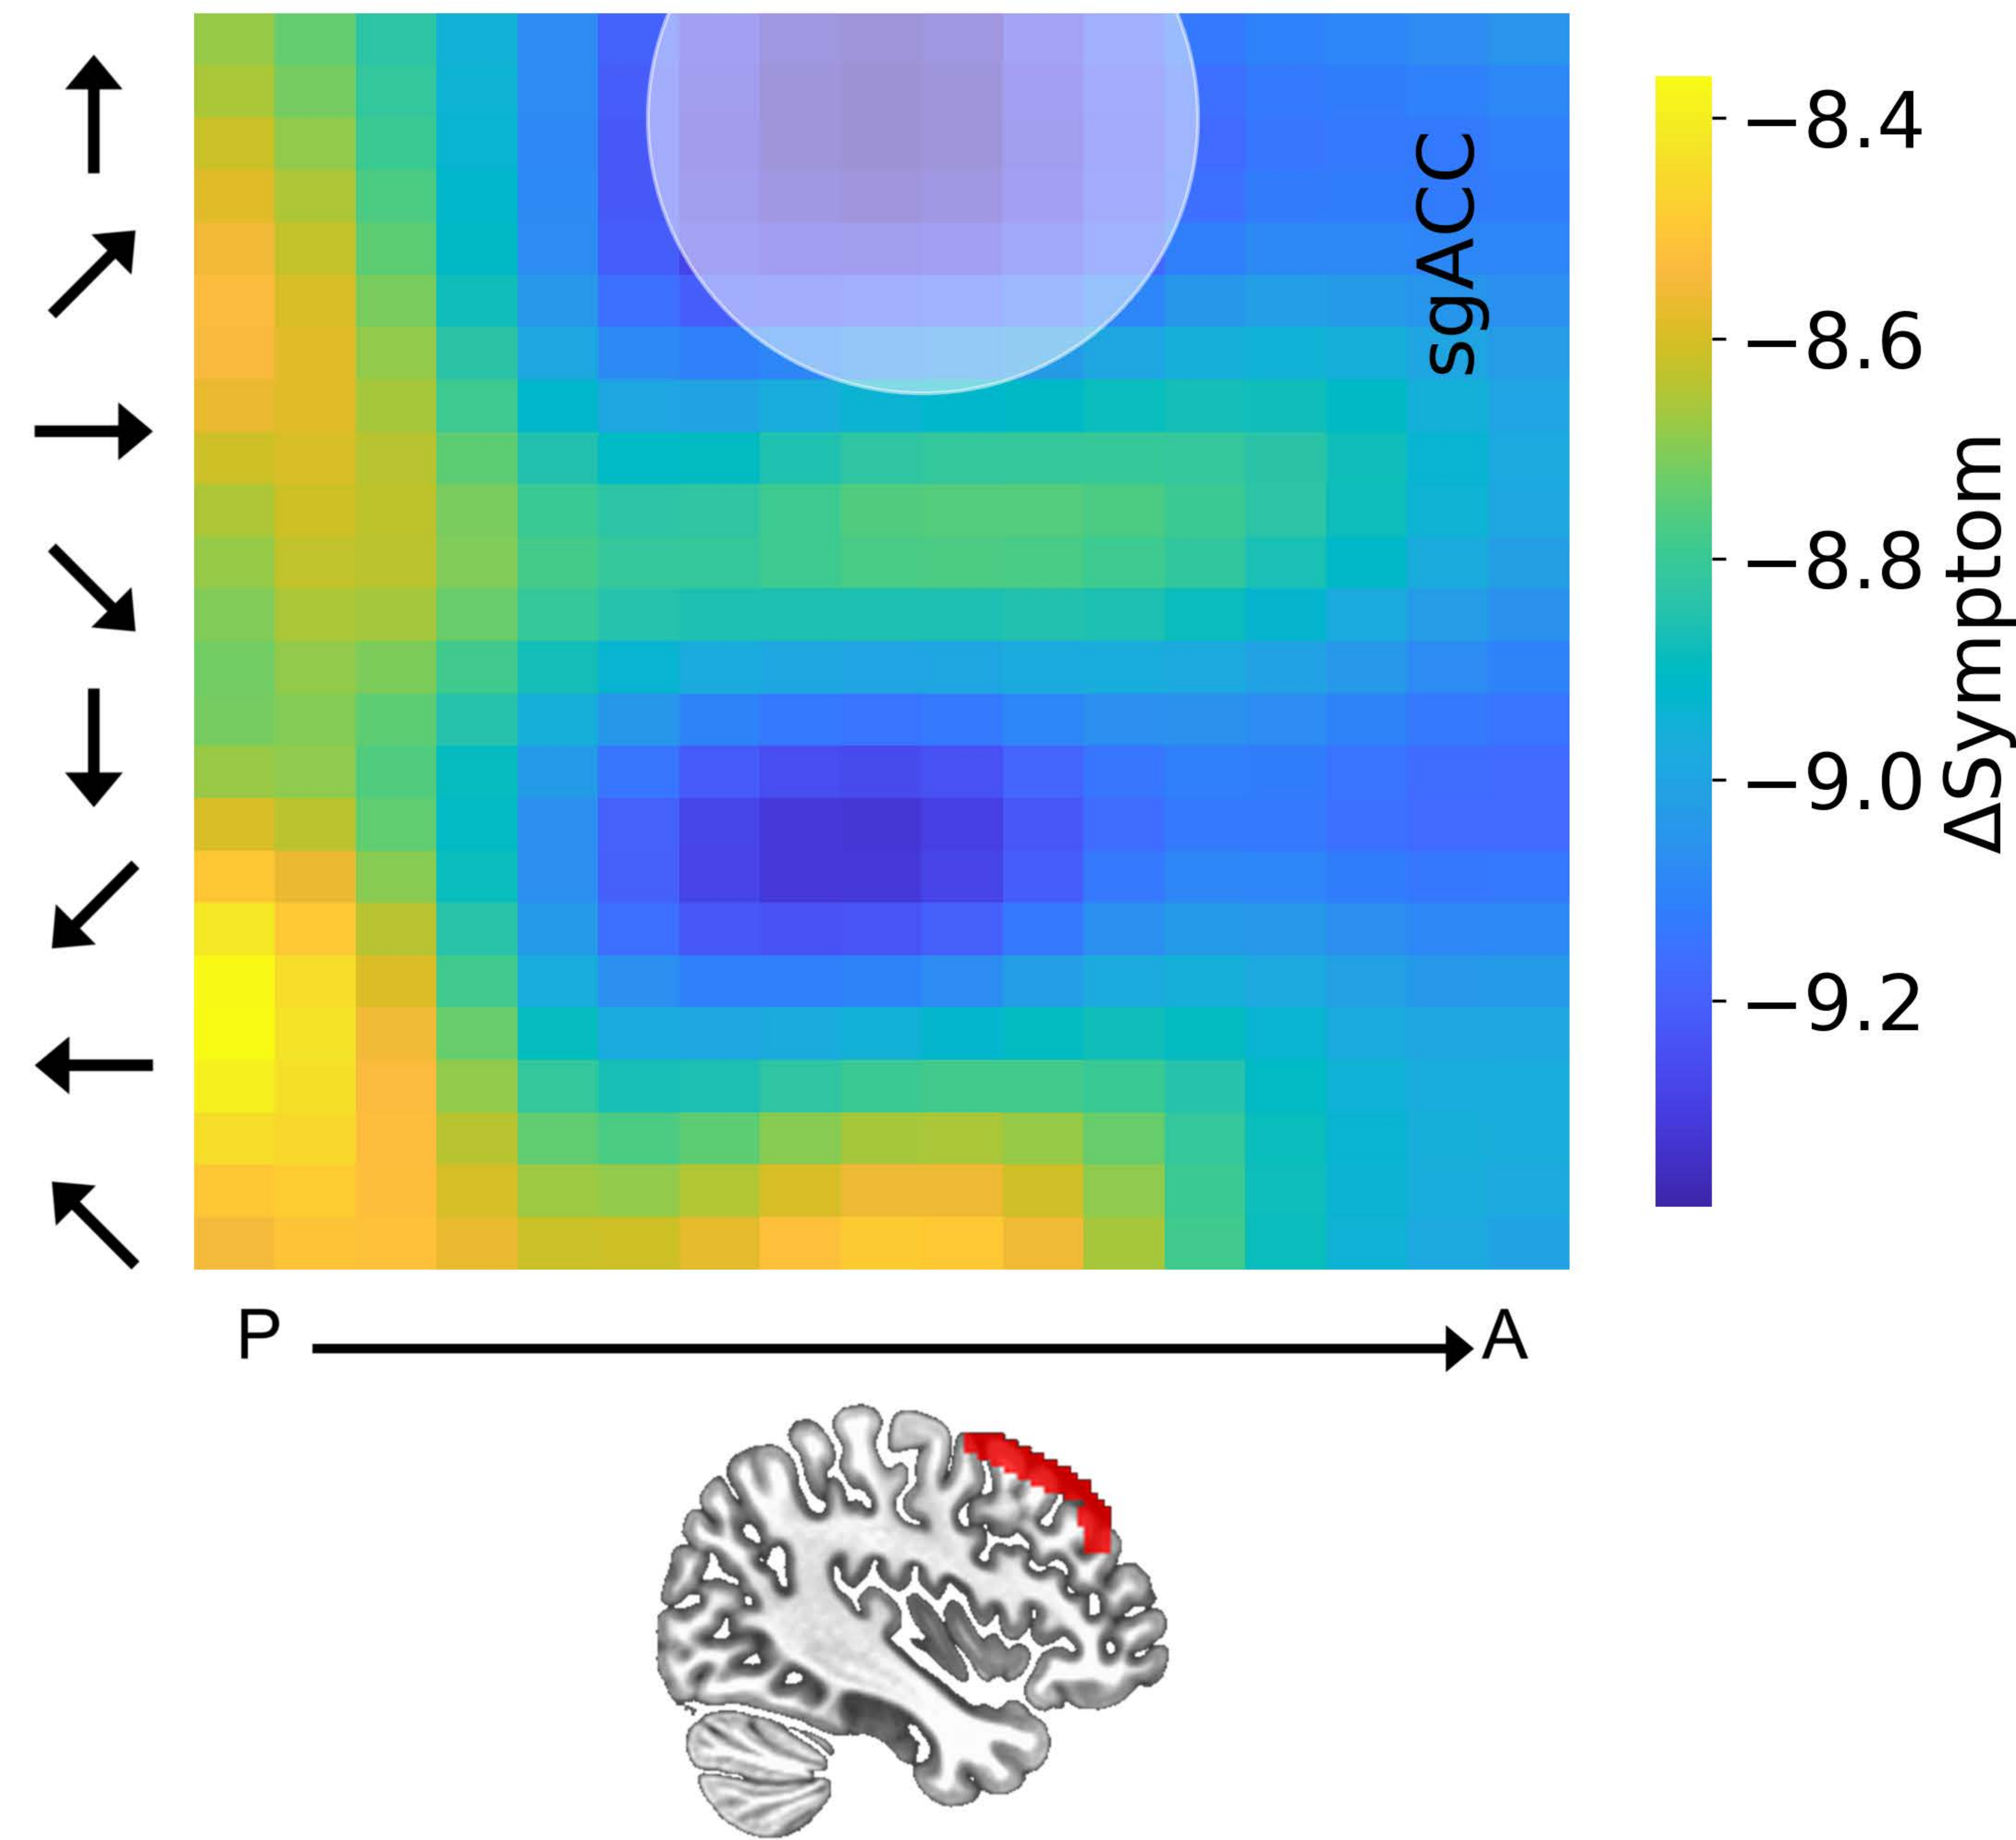



# INDARKT991DUC\_madrs\_left\_dlpfc

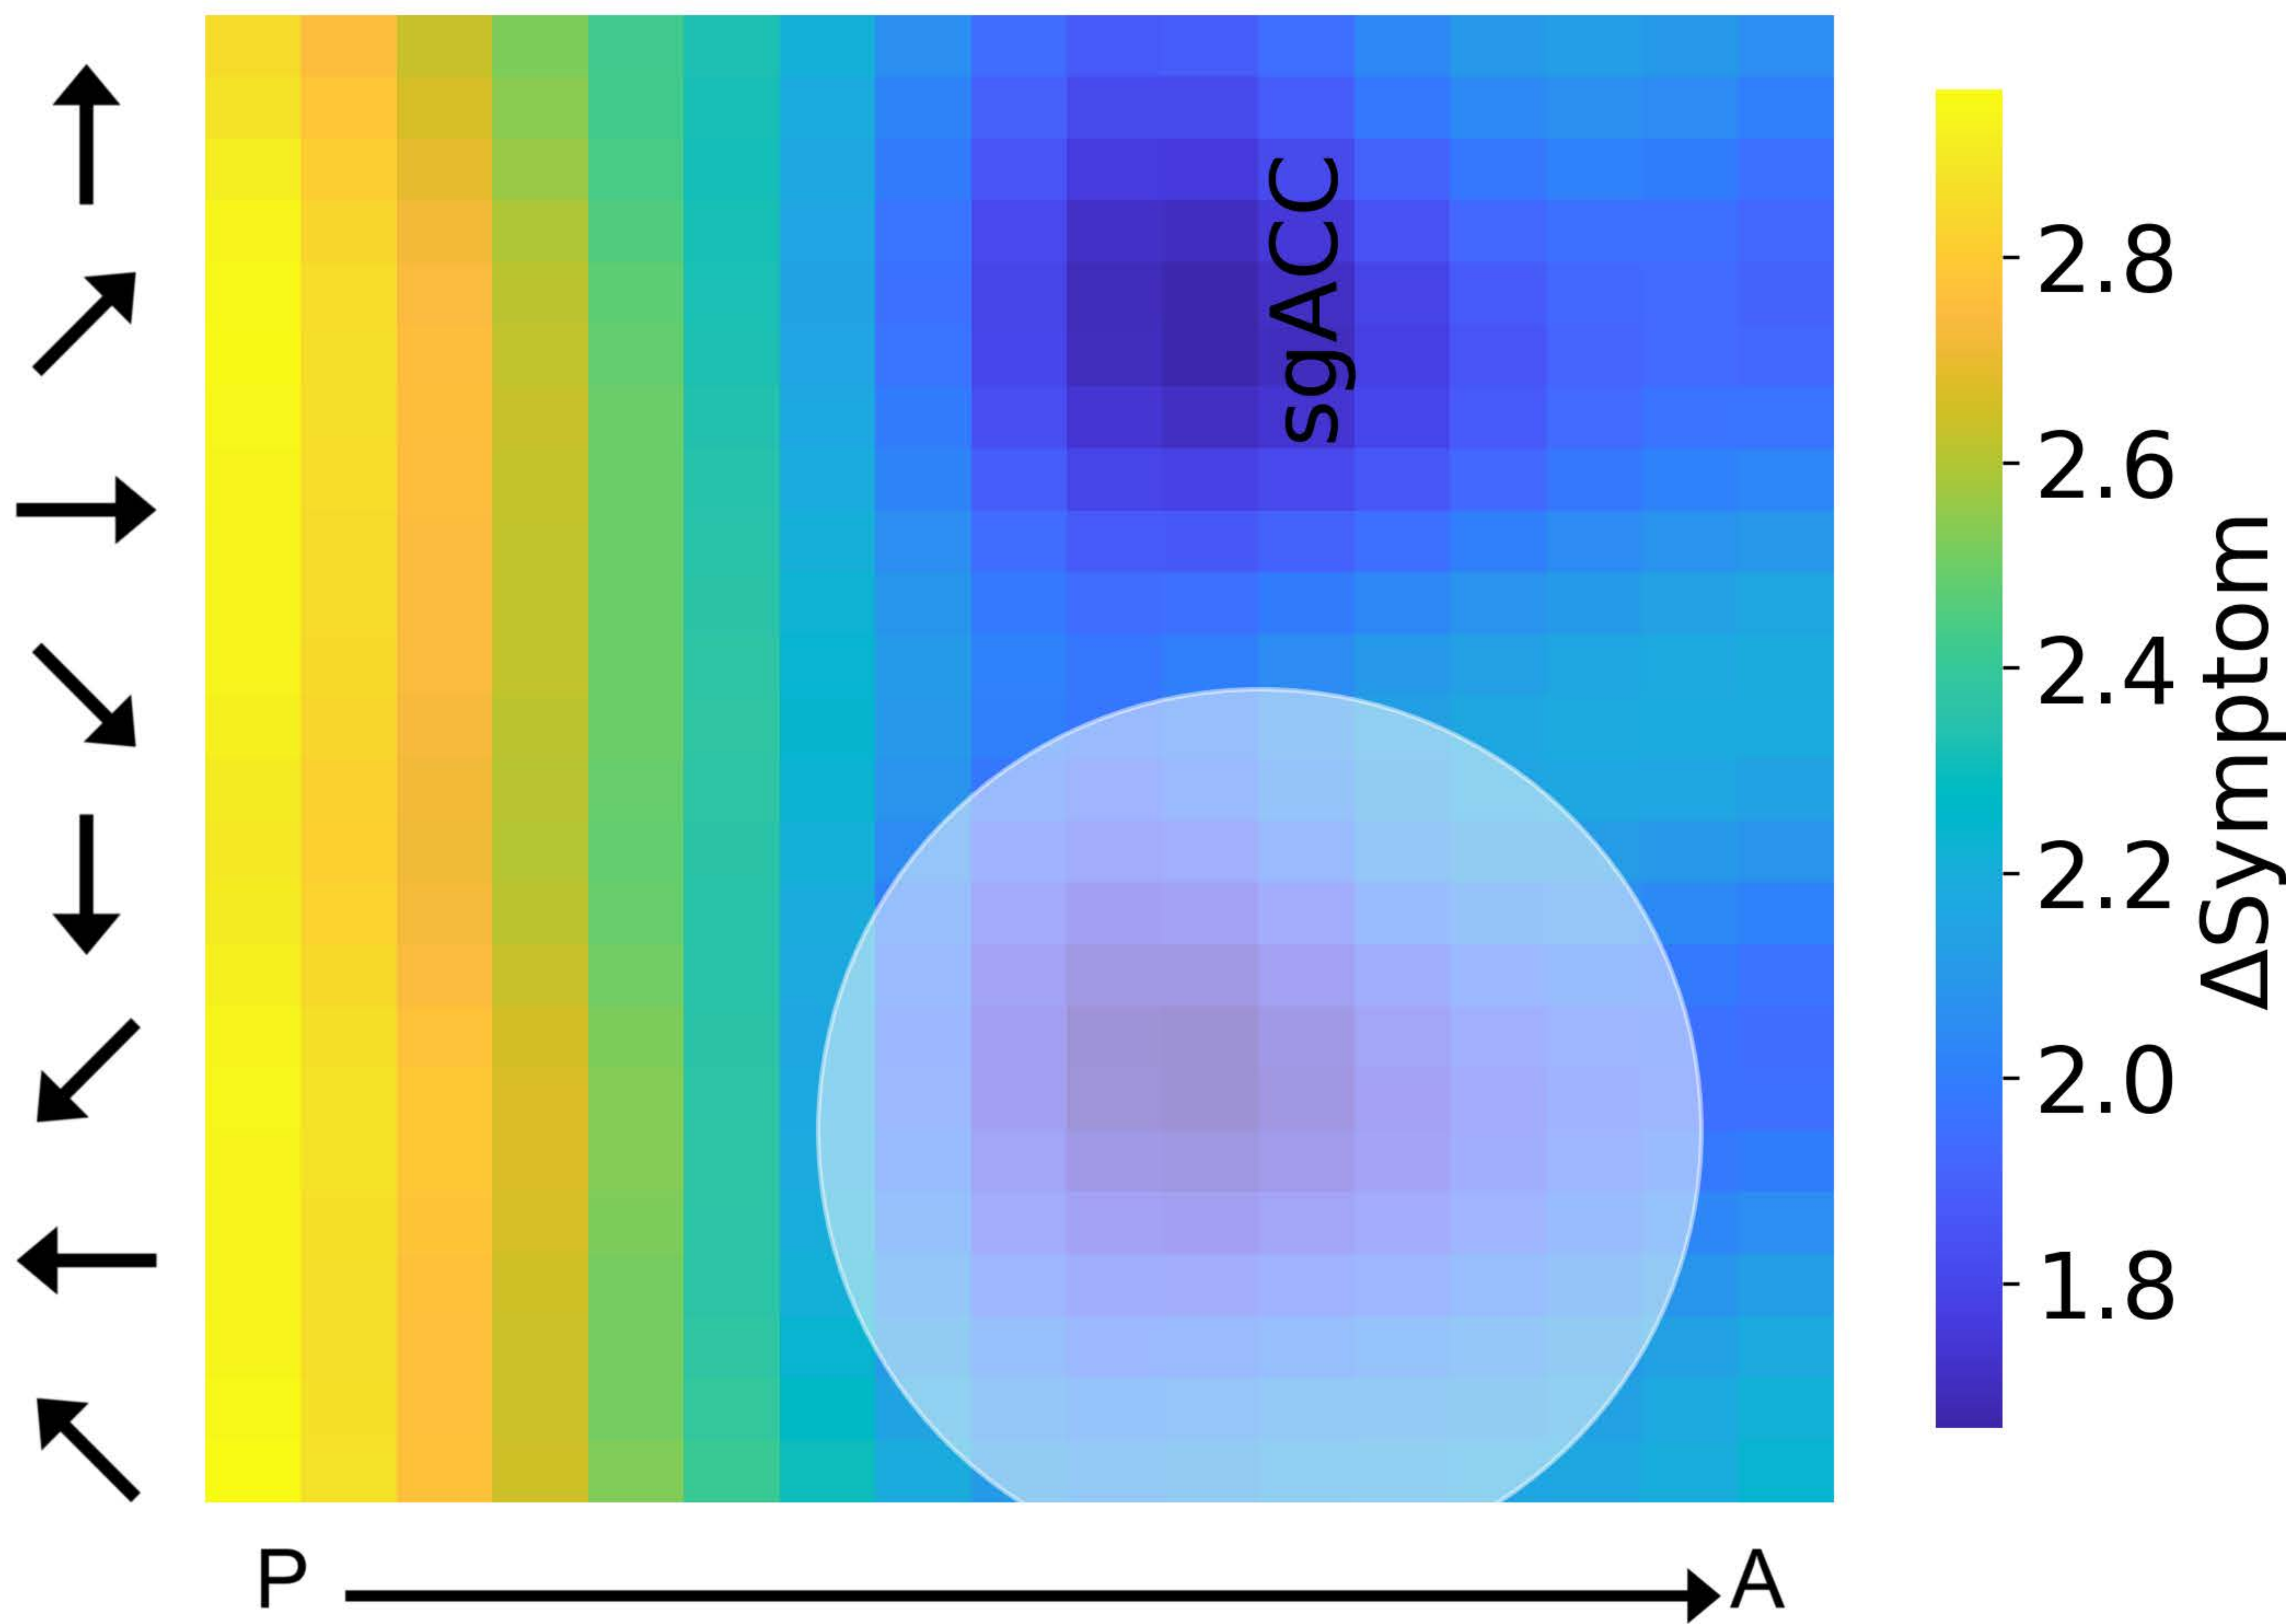



# NDARKU015LTM\_madrs\_left\_dlpfc

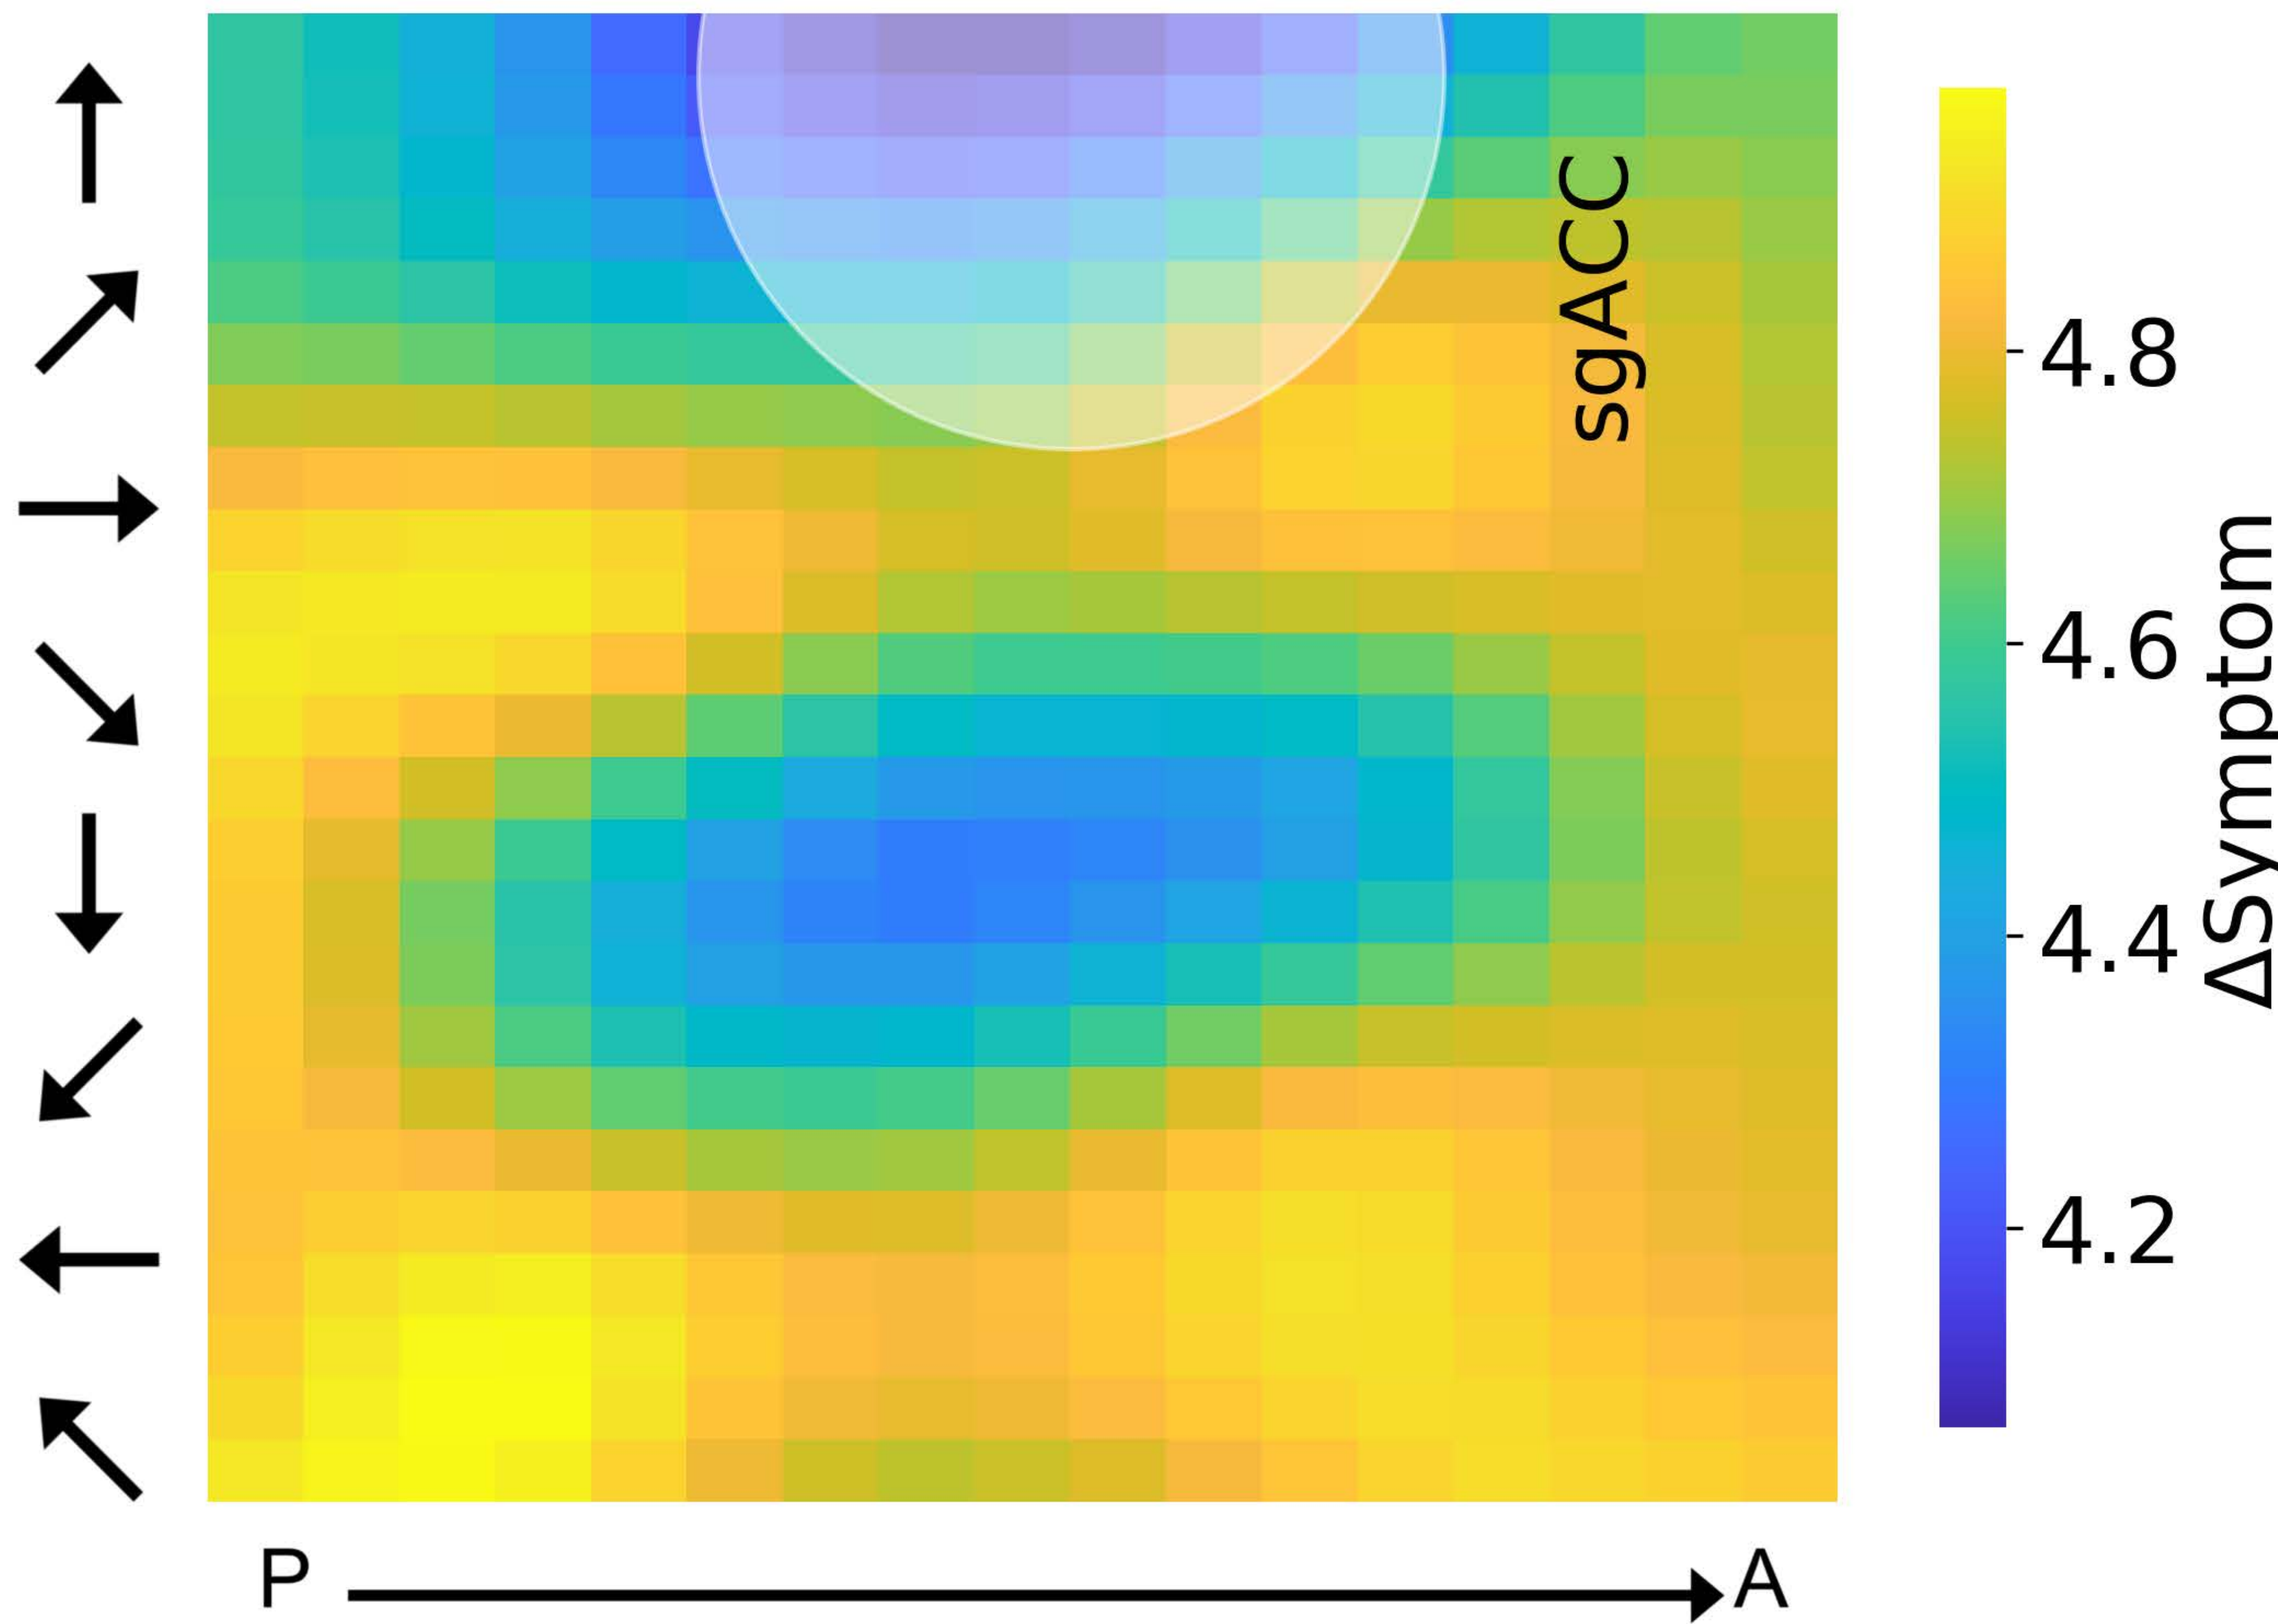



# NDARKV126RTP\_madr\_left\_dlpfc

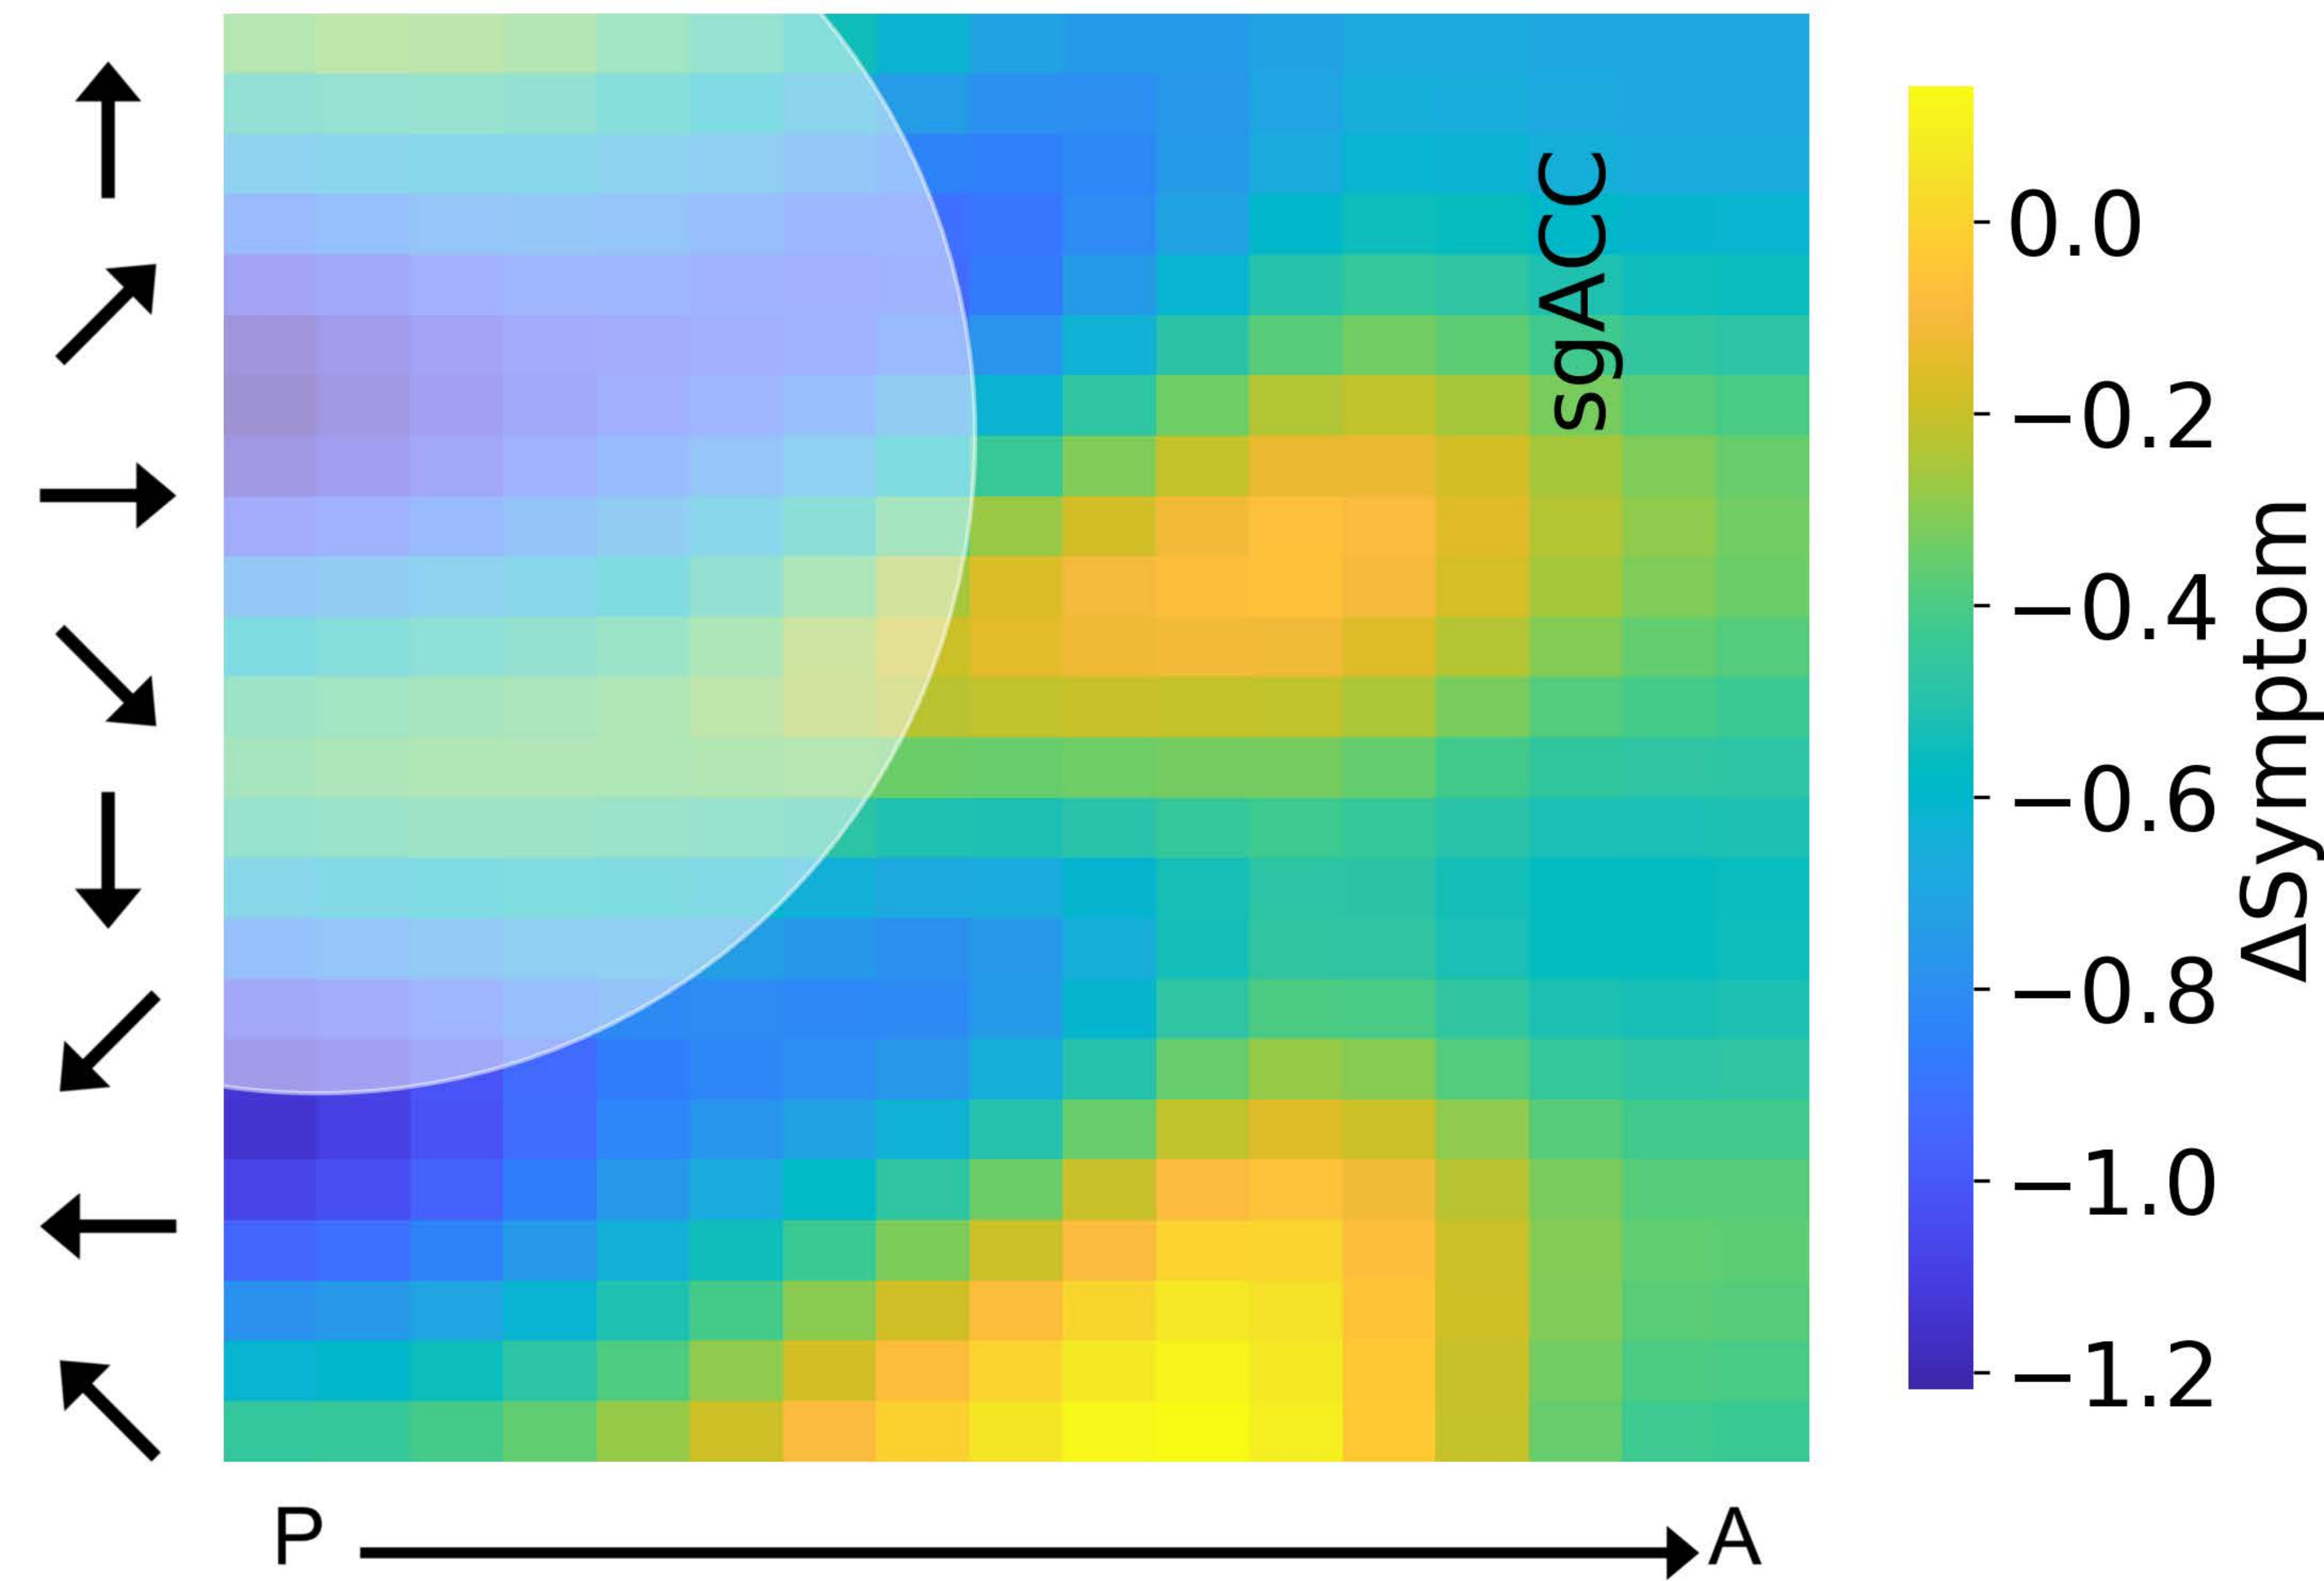



# INDARLF826BAB\_madr\_left\_dlpfc

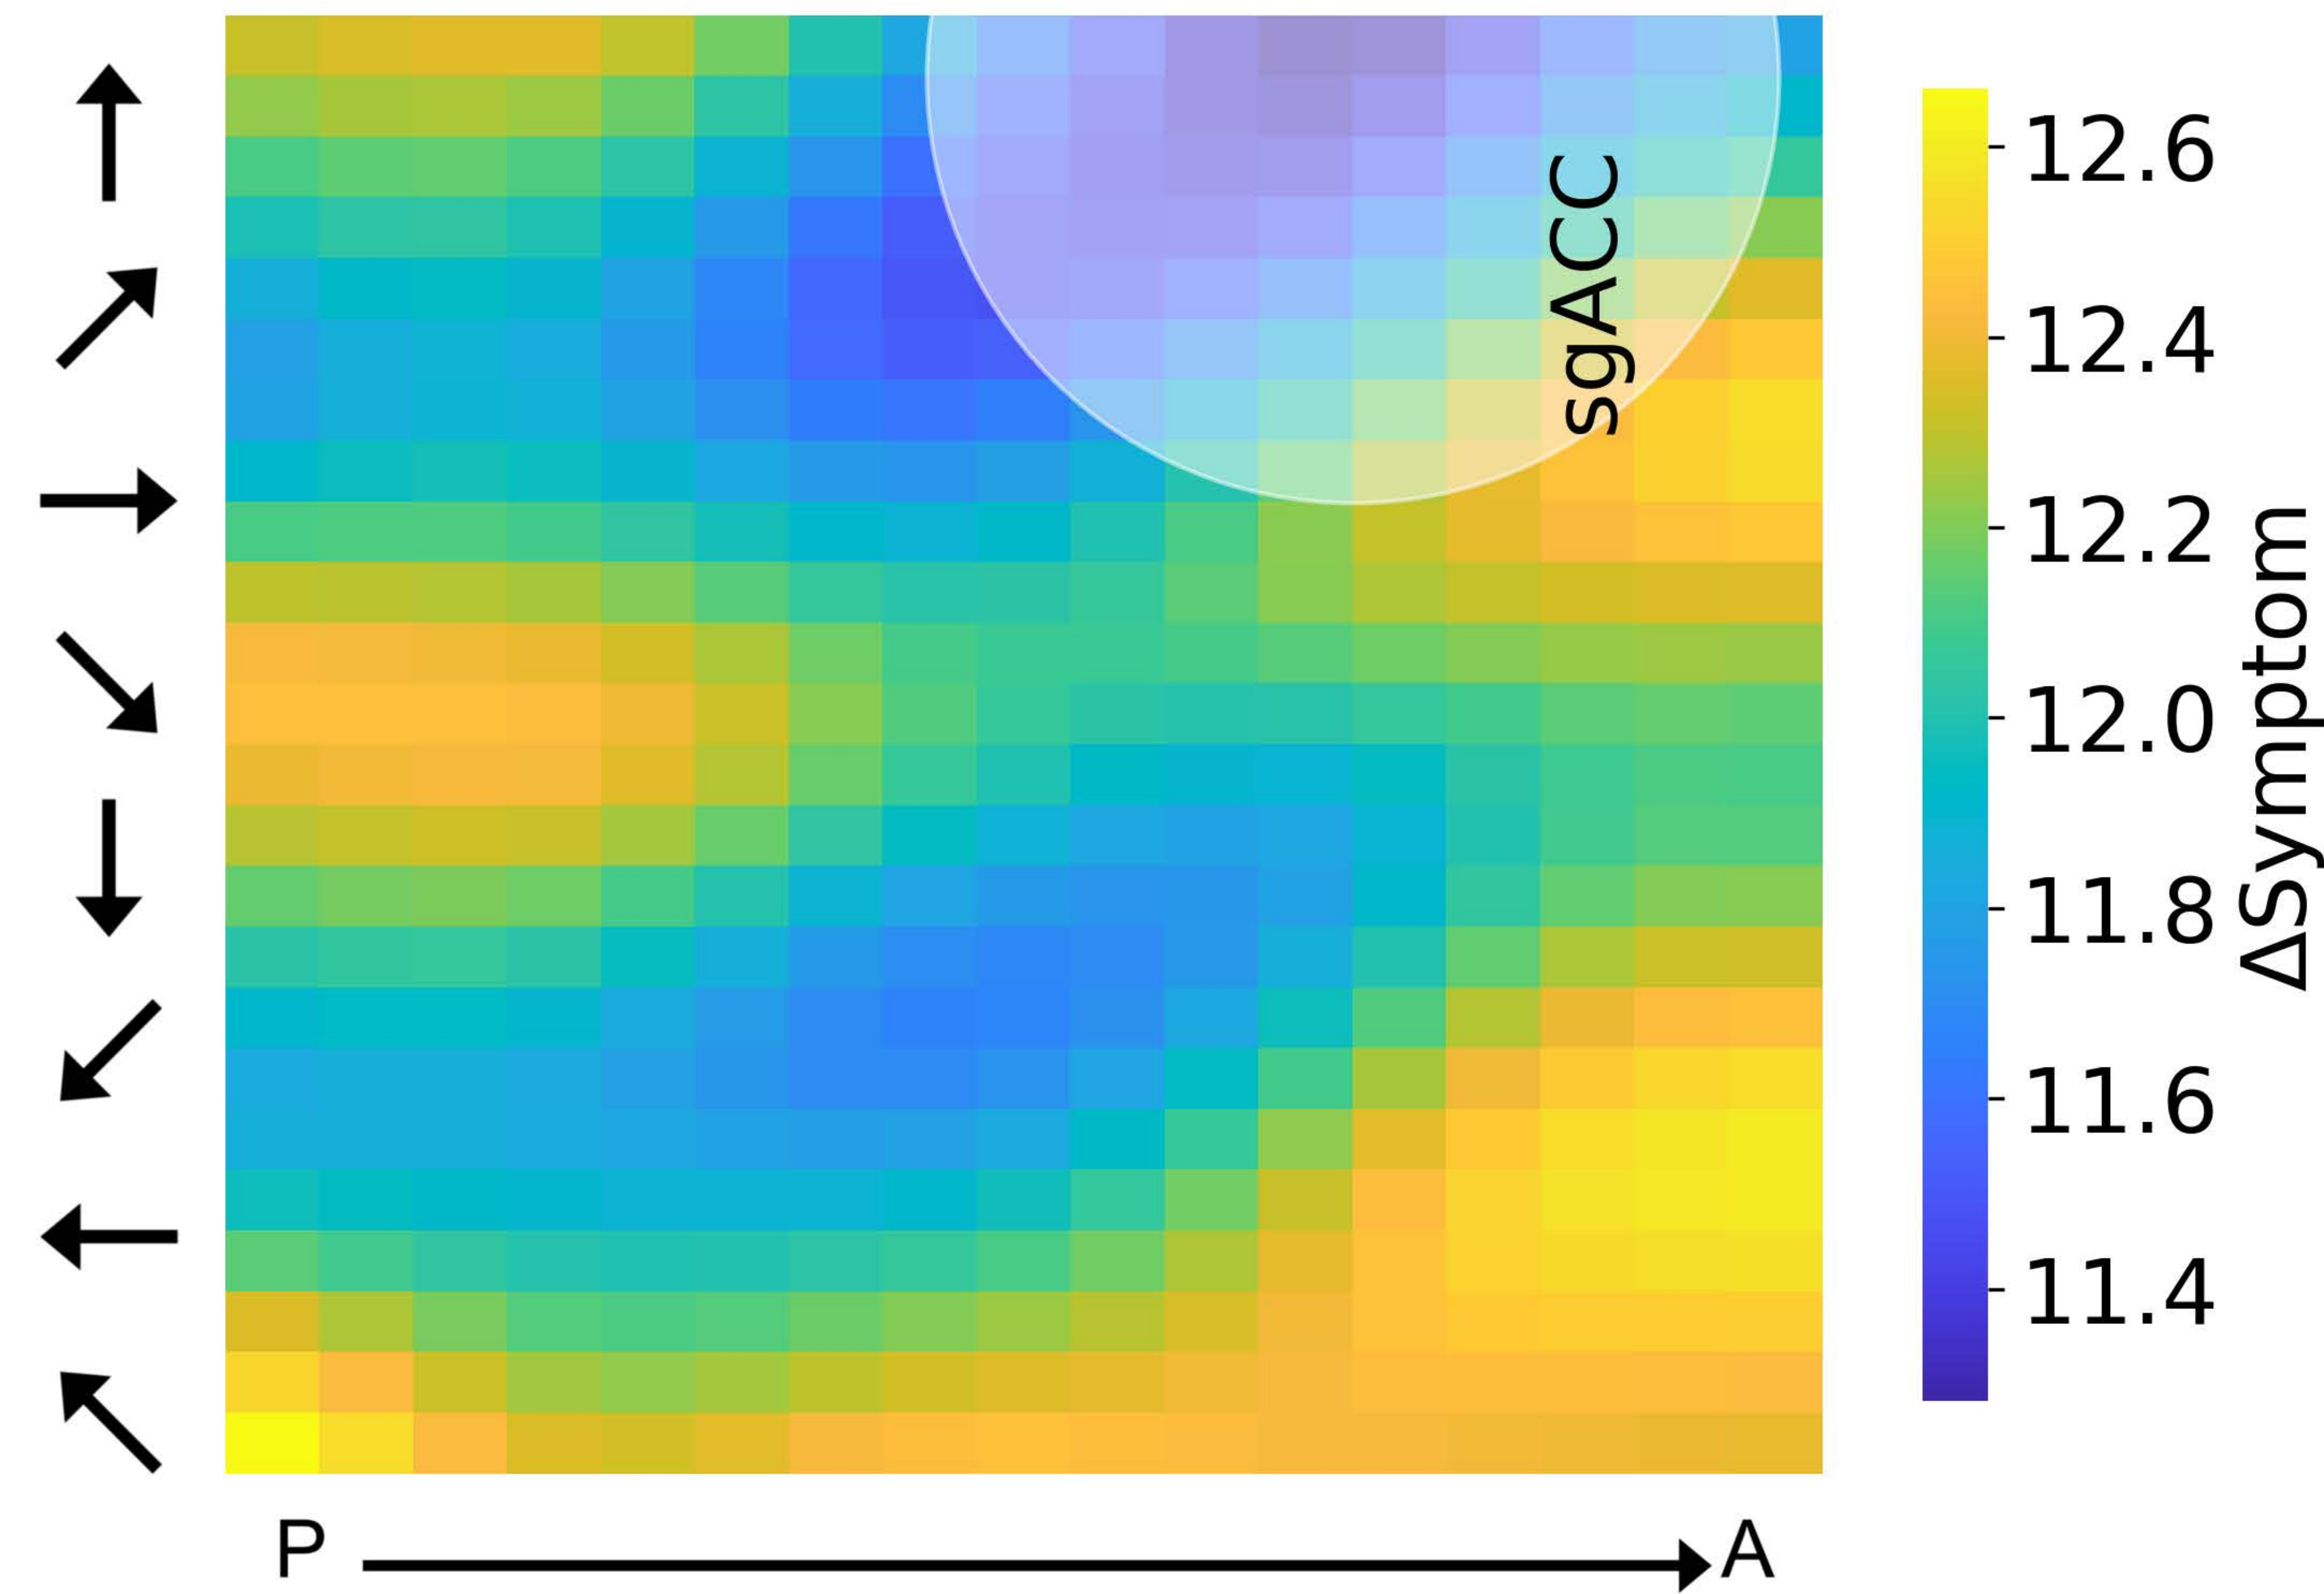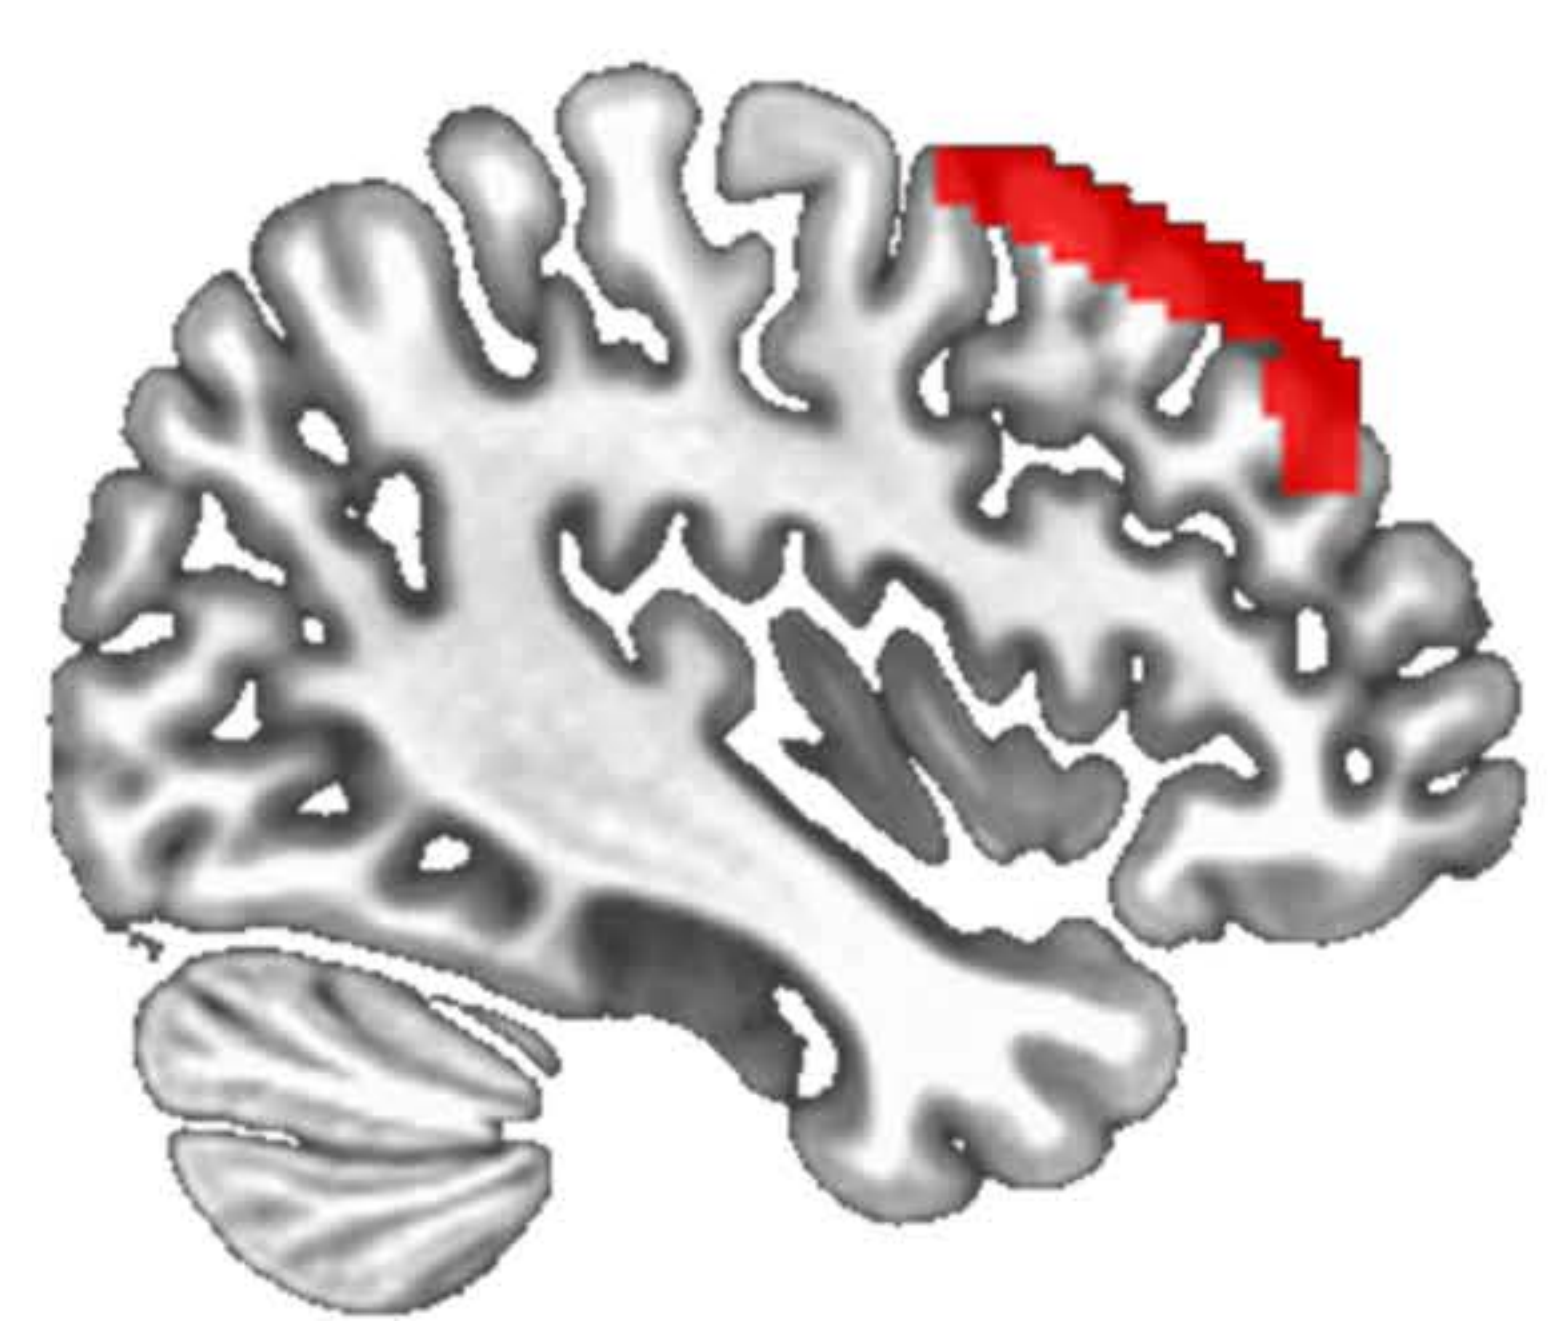



# NDARLM890ELE\_madrs\_left\_dlpfc

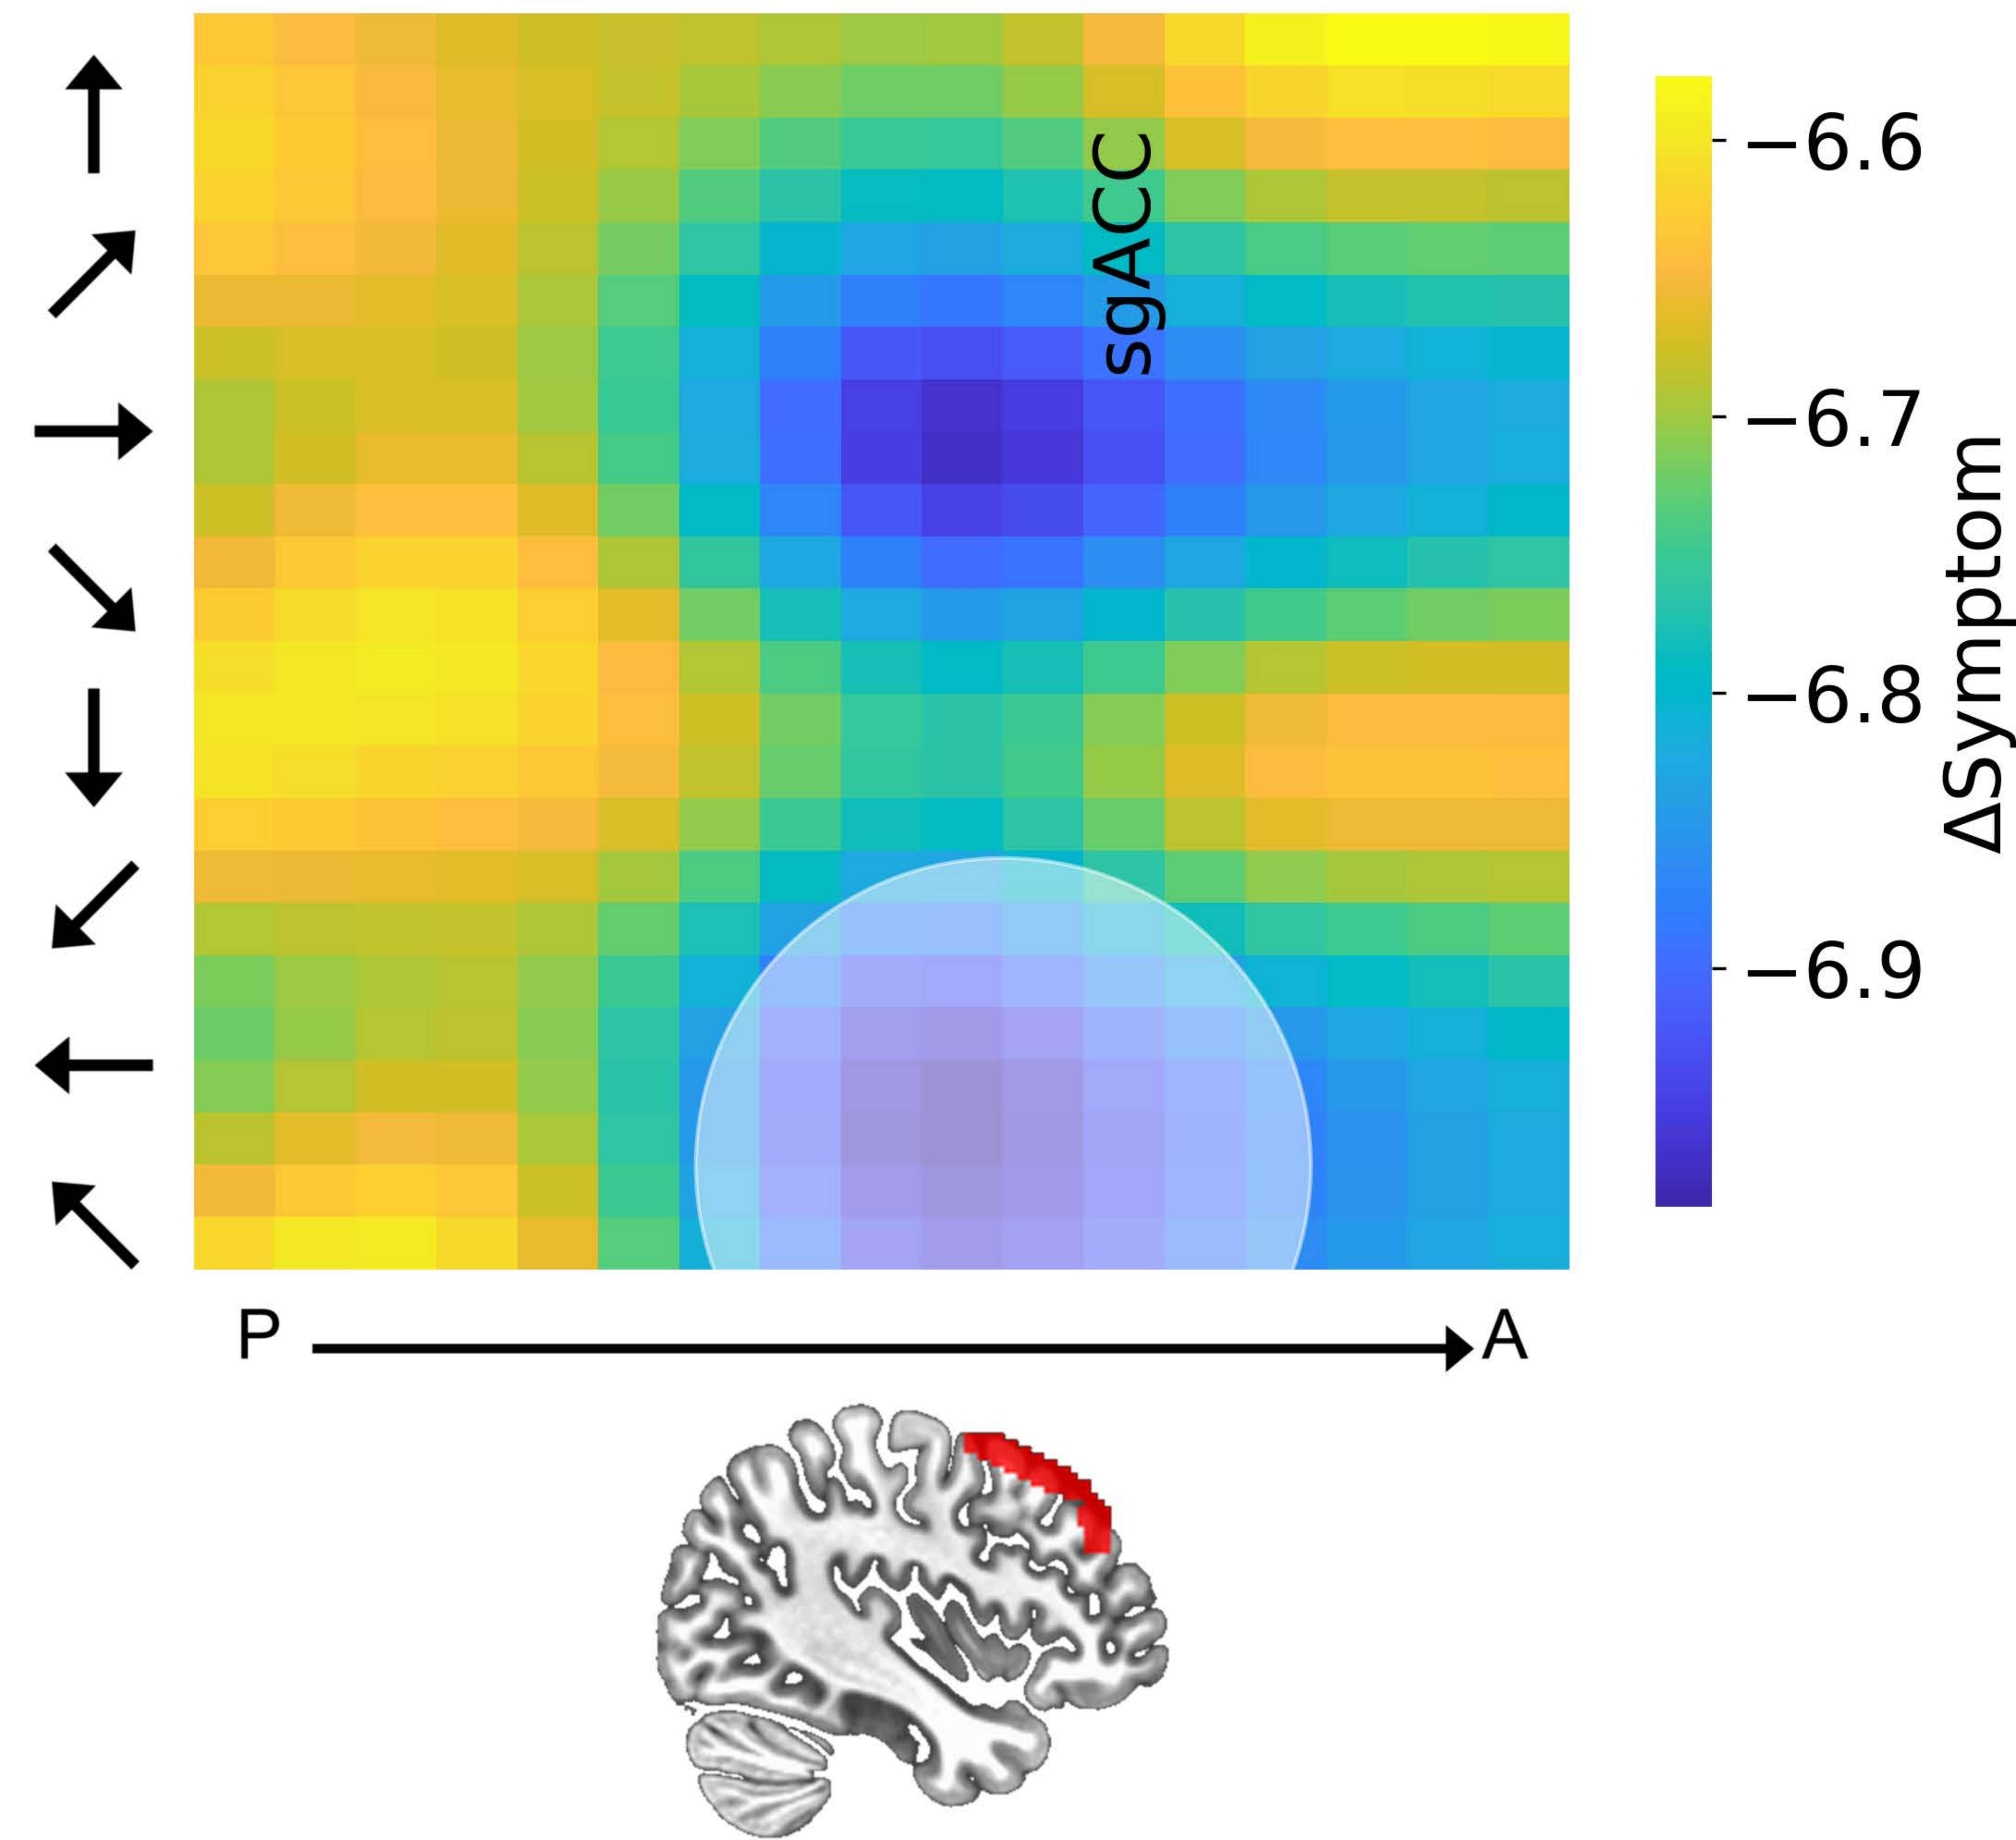



# INDARLZ935EEN\_madrs\_left\_dlpfc

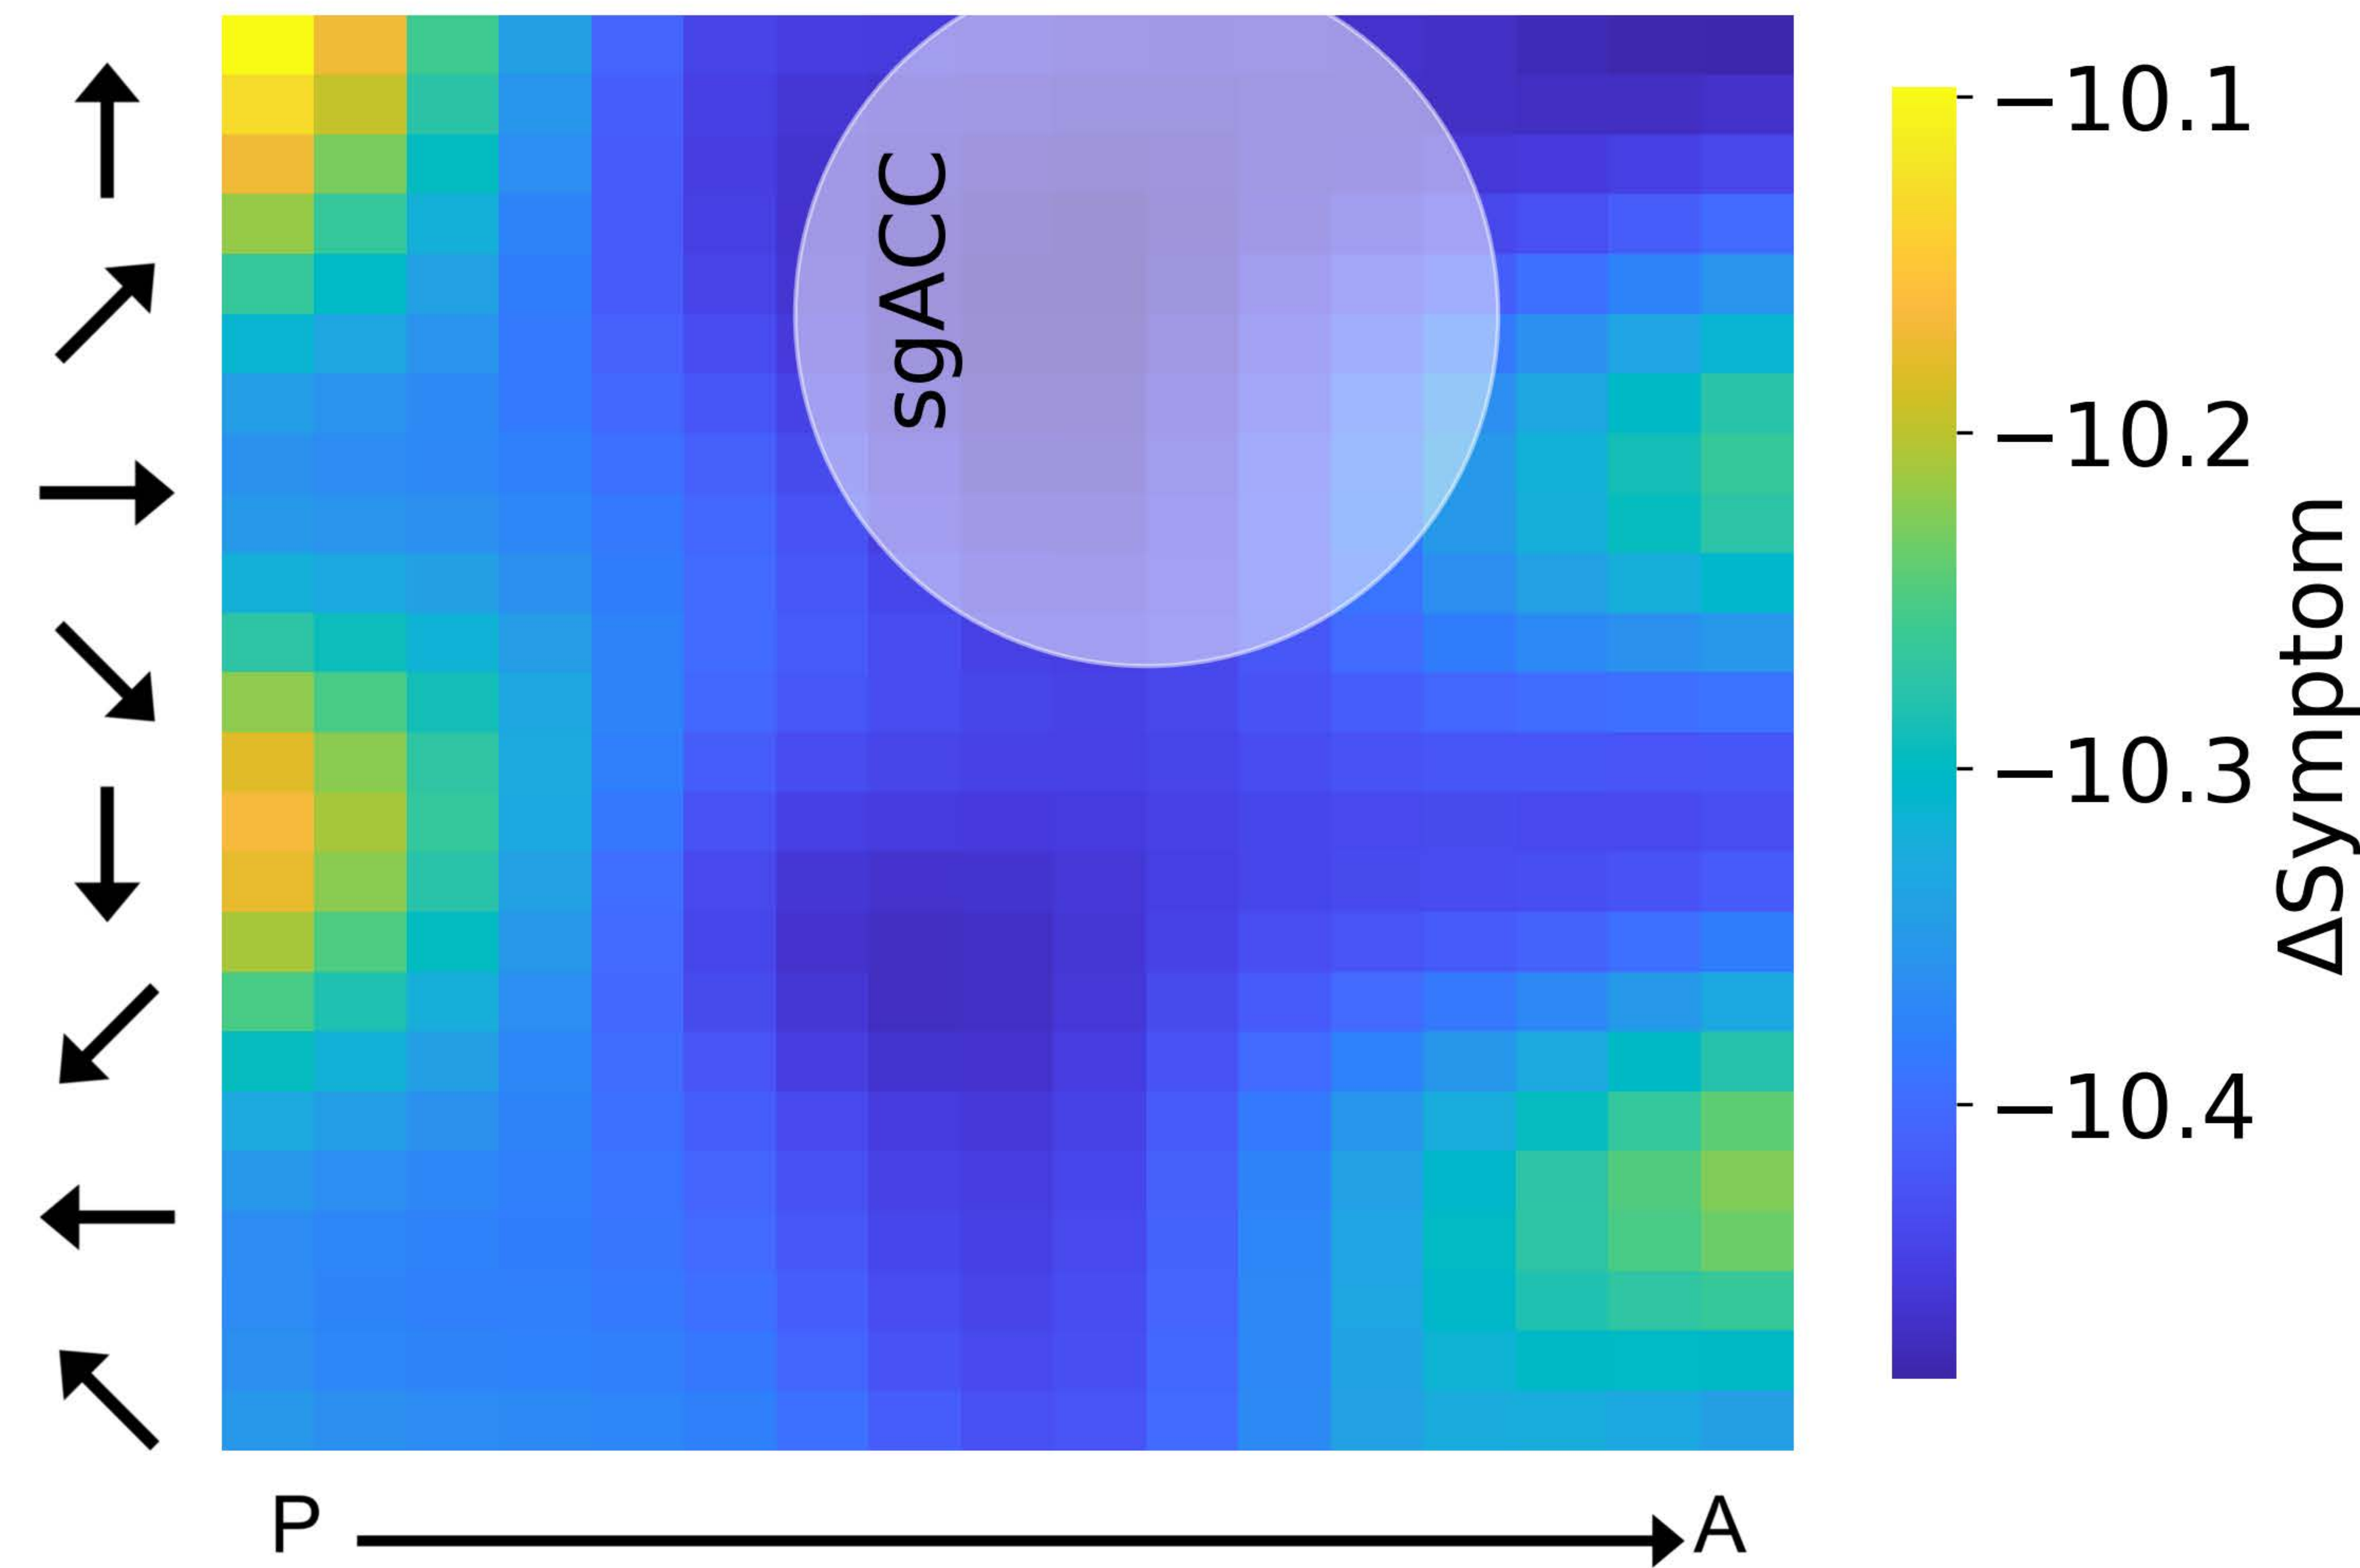



# NDARMA155ATG\_madrs\_left\_dlpfc

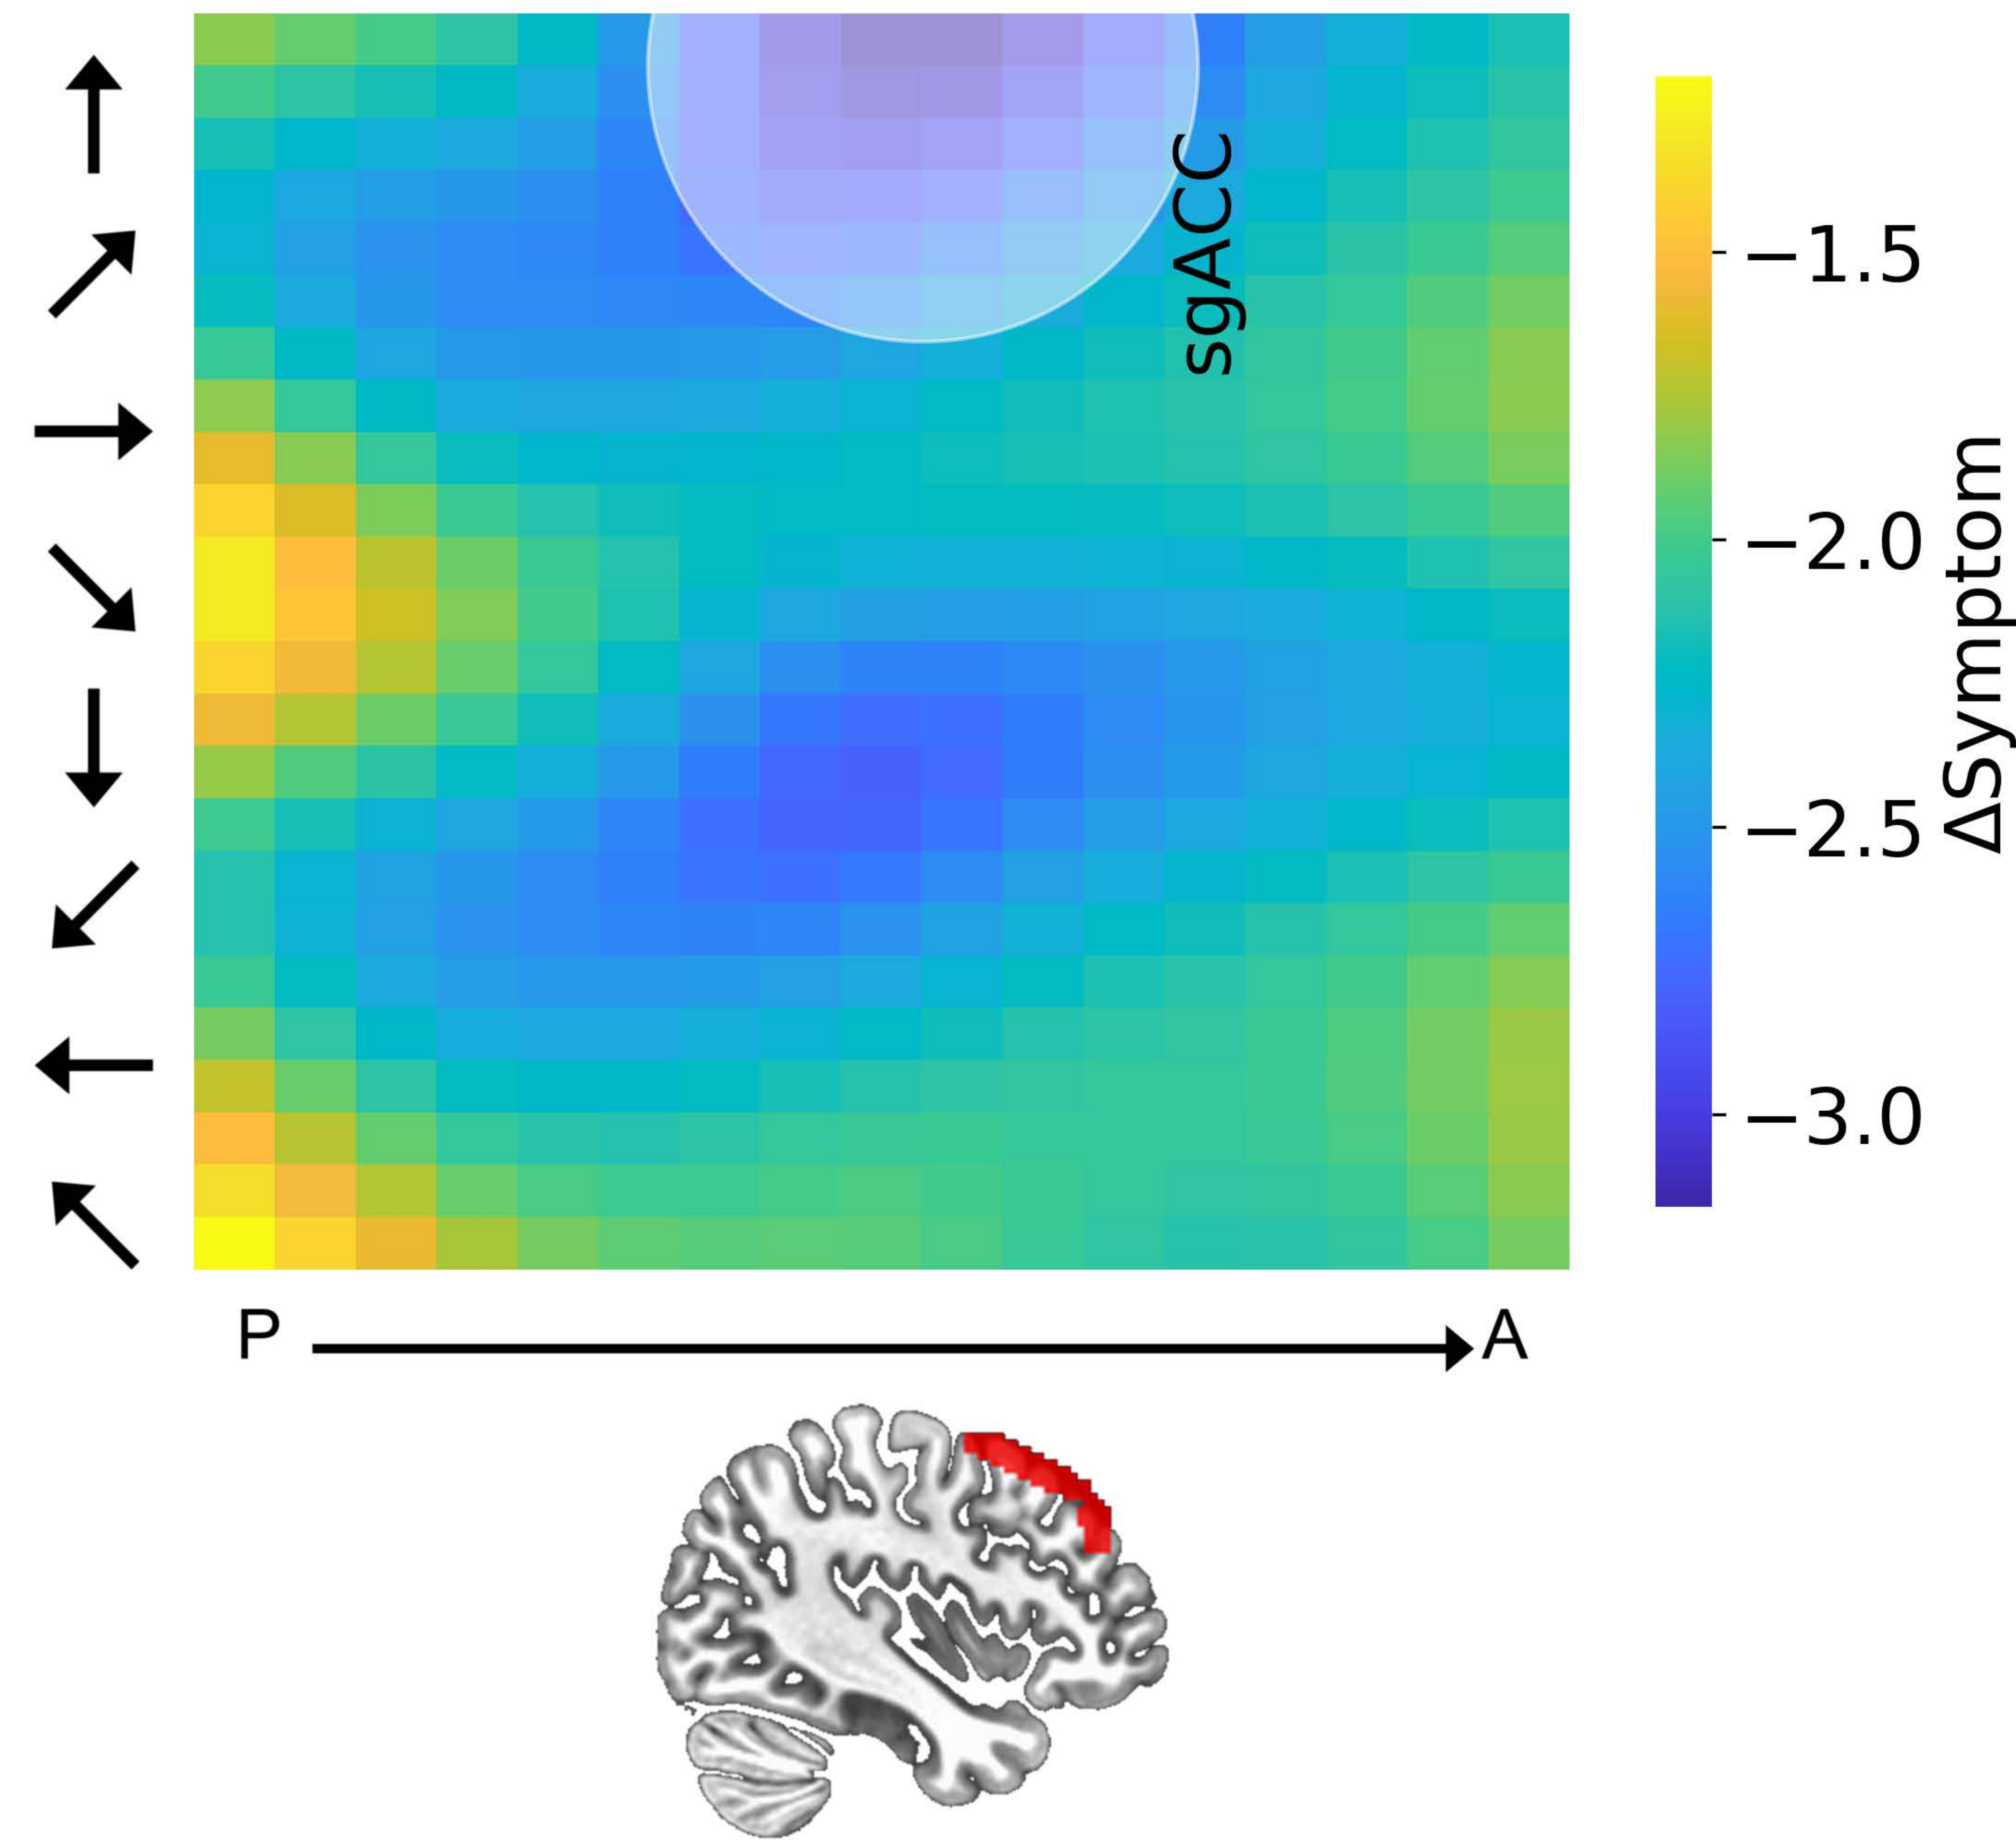



# INDARMB943VPJ\_madrs\_left\_dlpfc

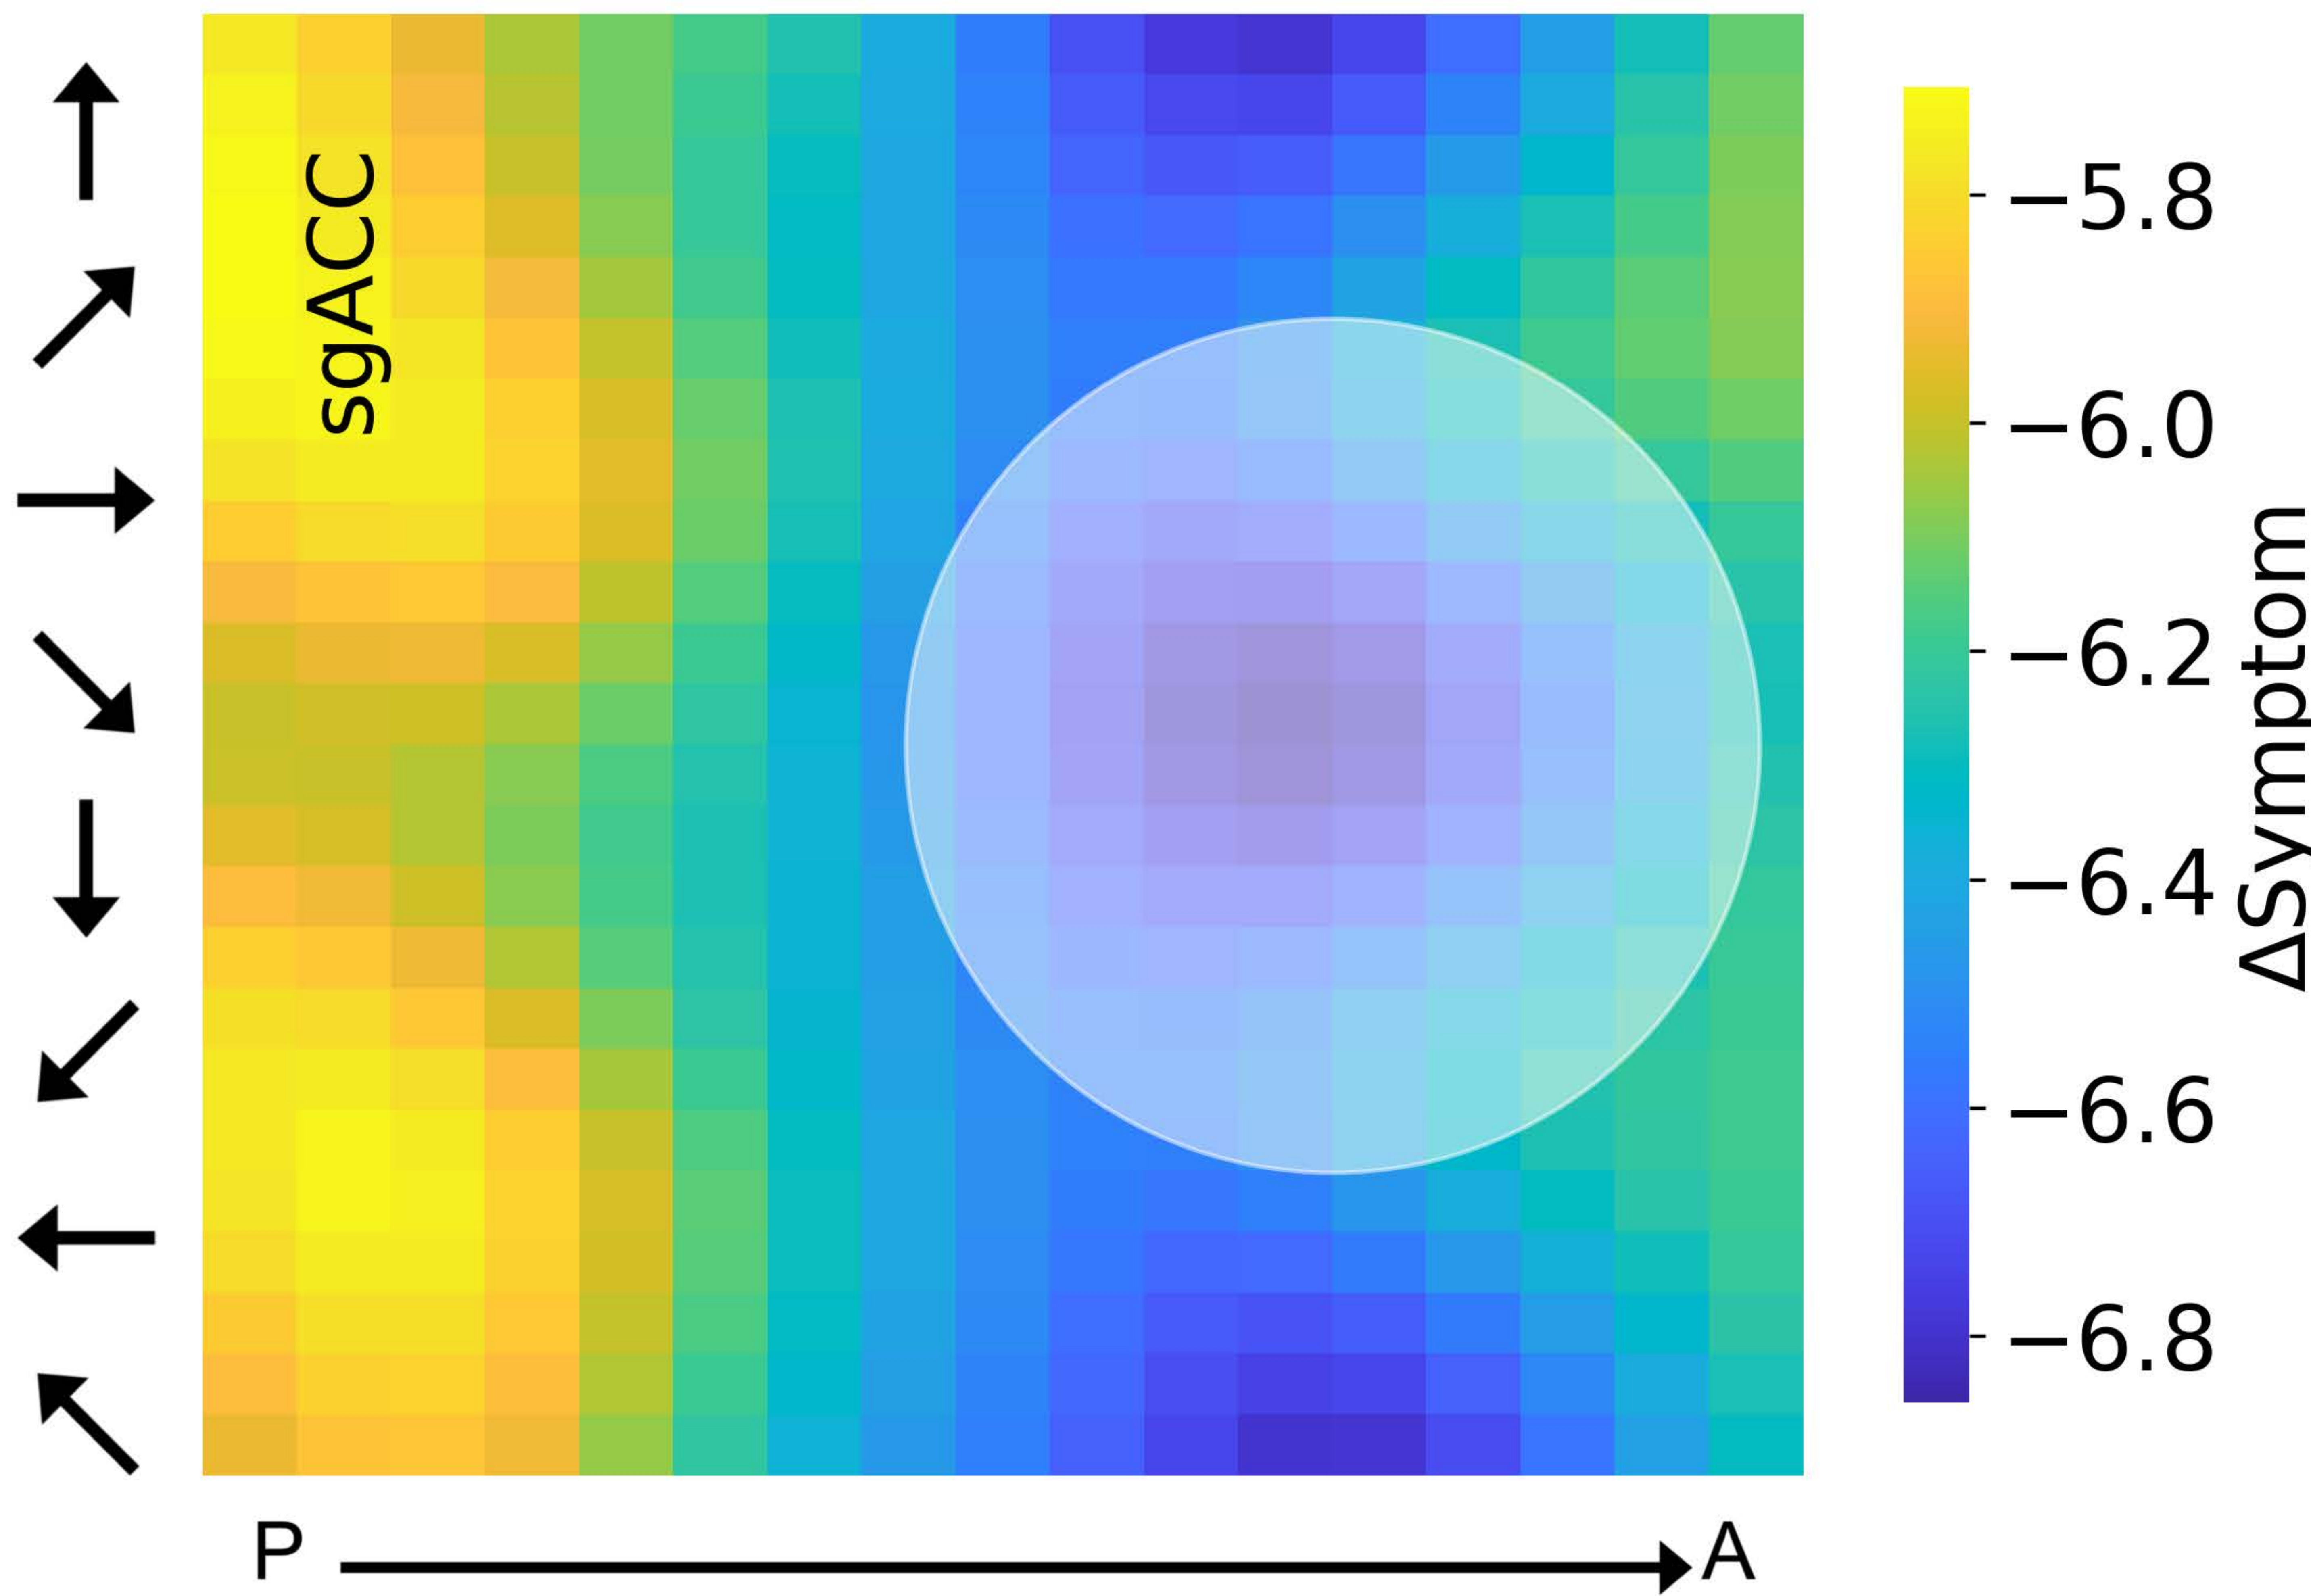



# NDARM016CB8\_madrs\_left\_dlpfc

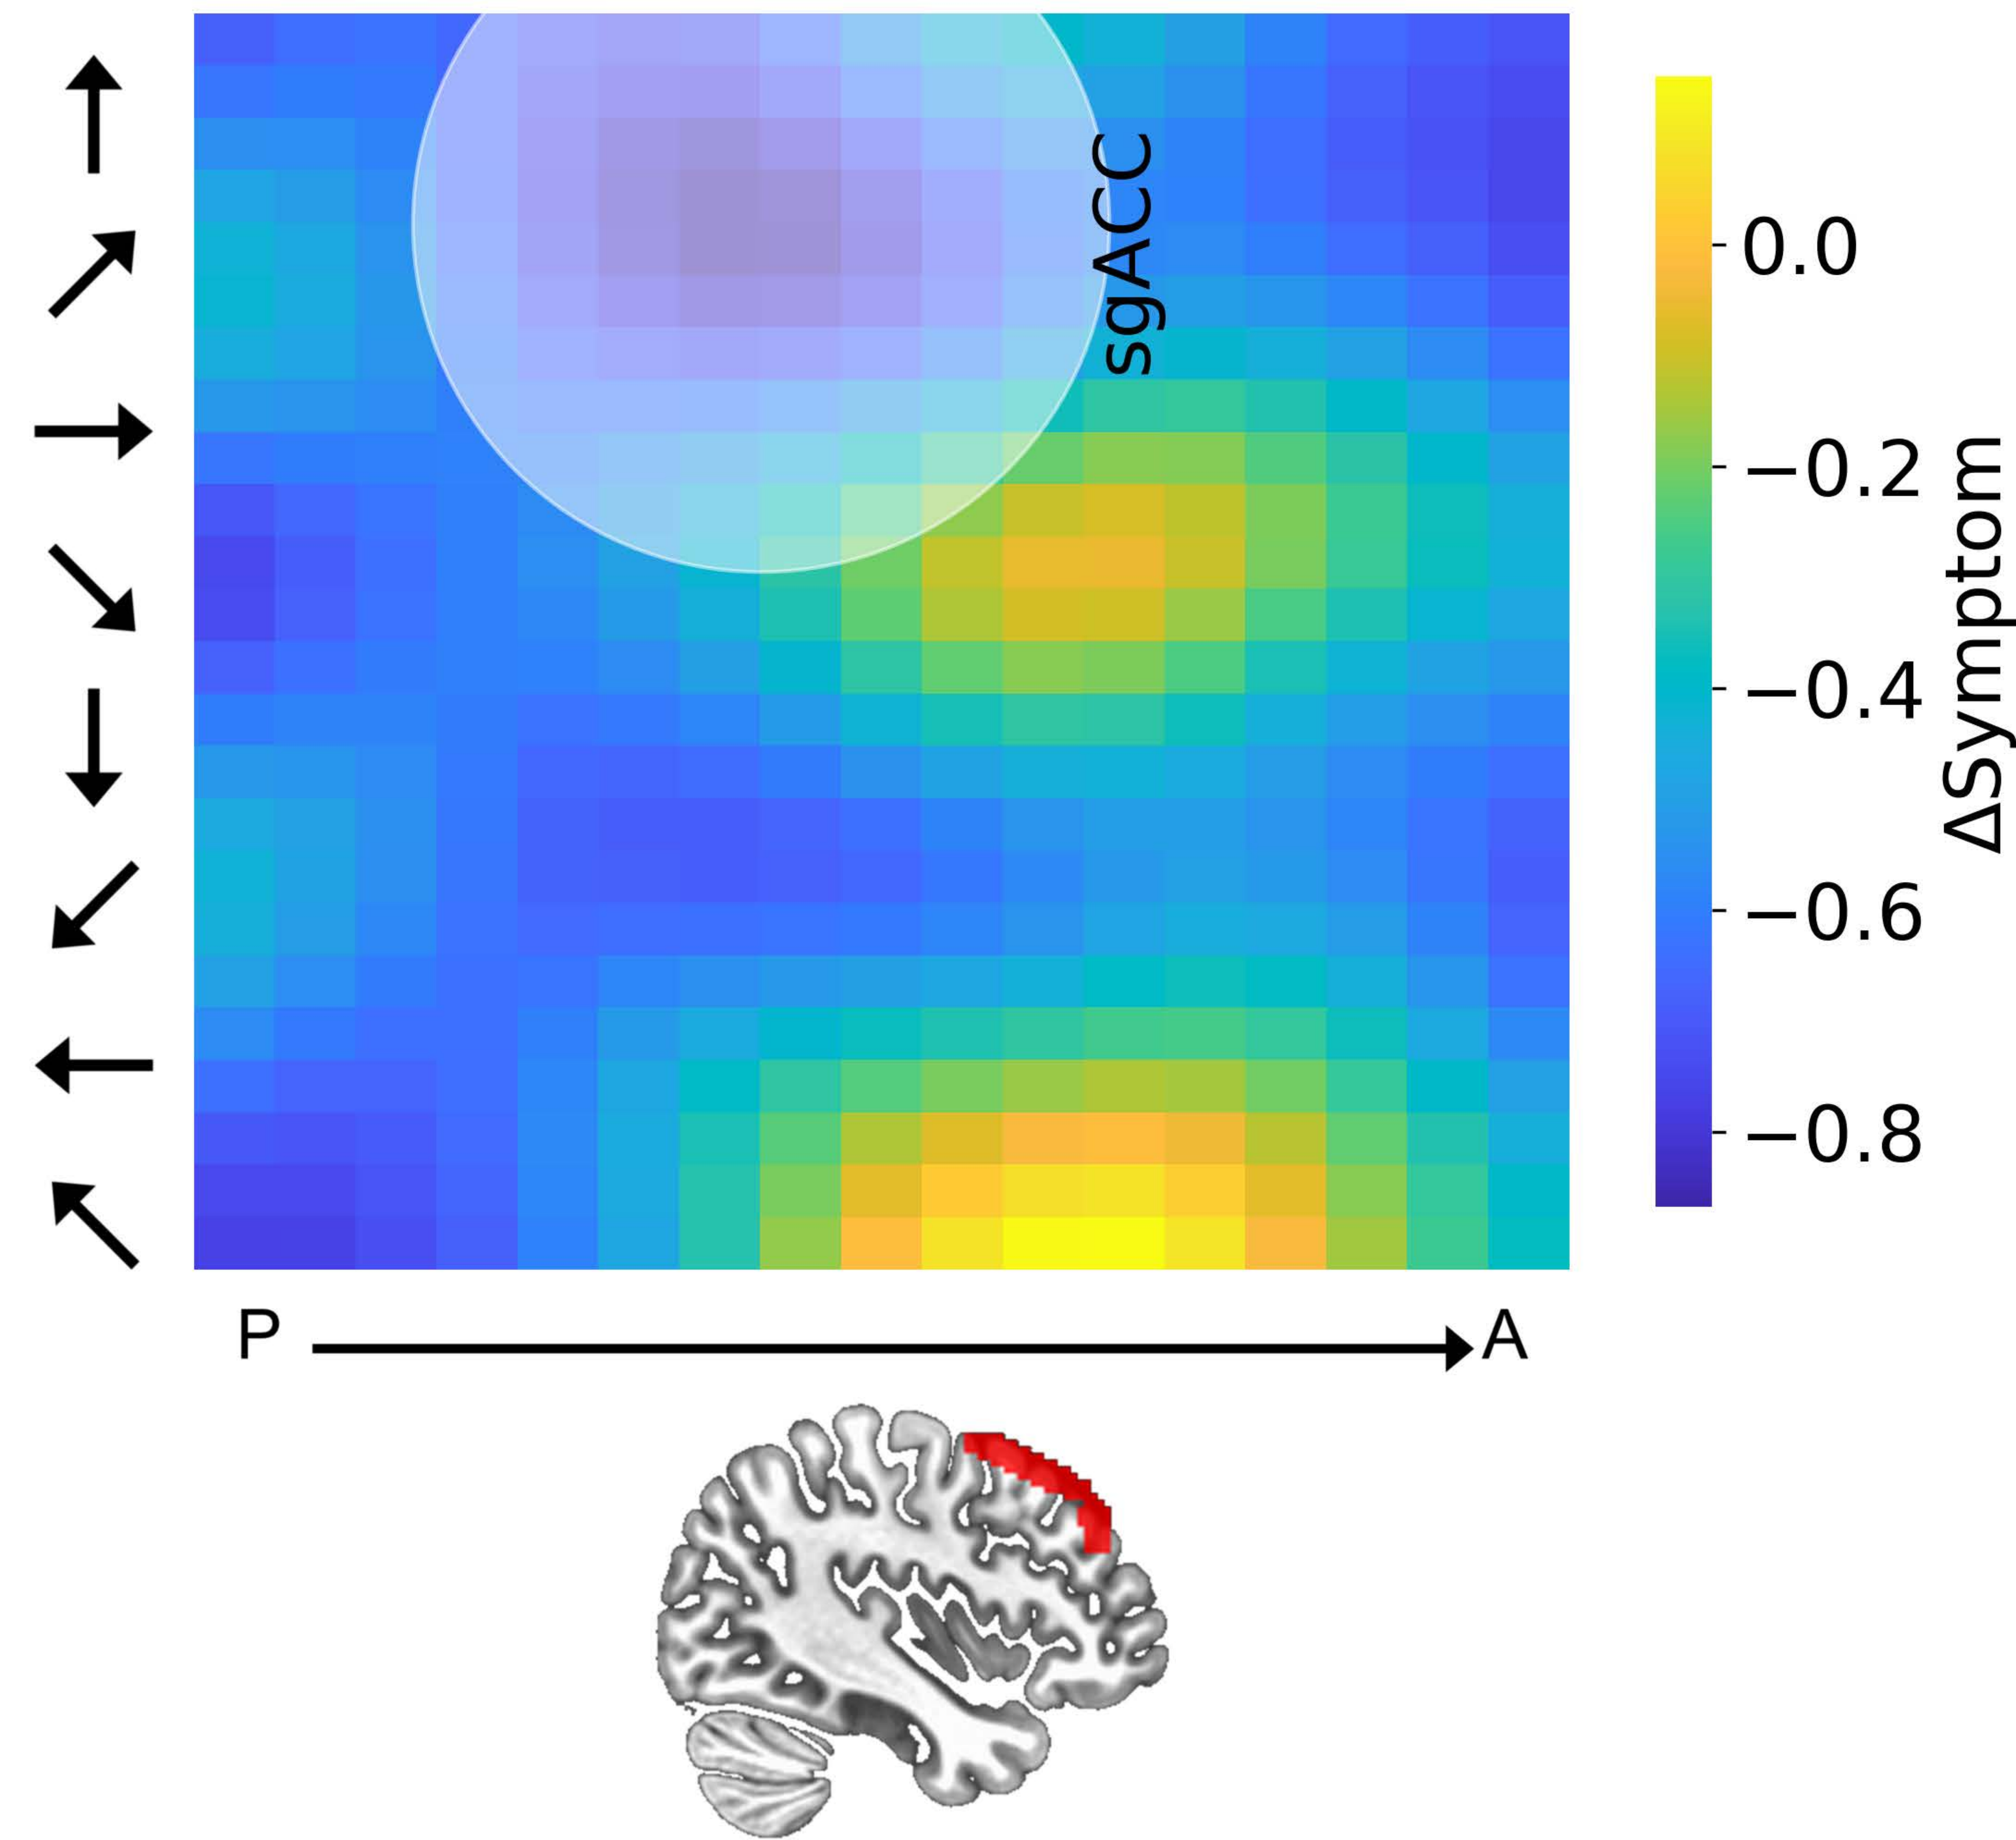



# NDARMD601CTU\_madrs\_left\_dlpfc

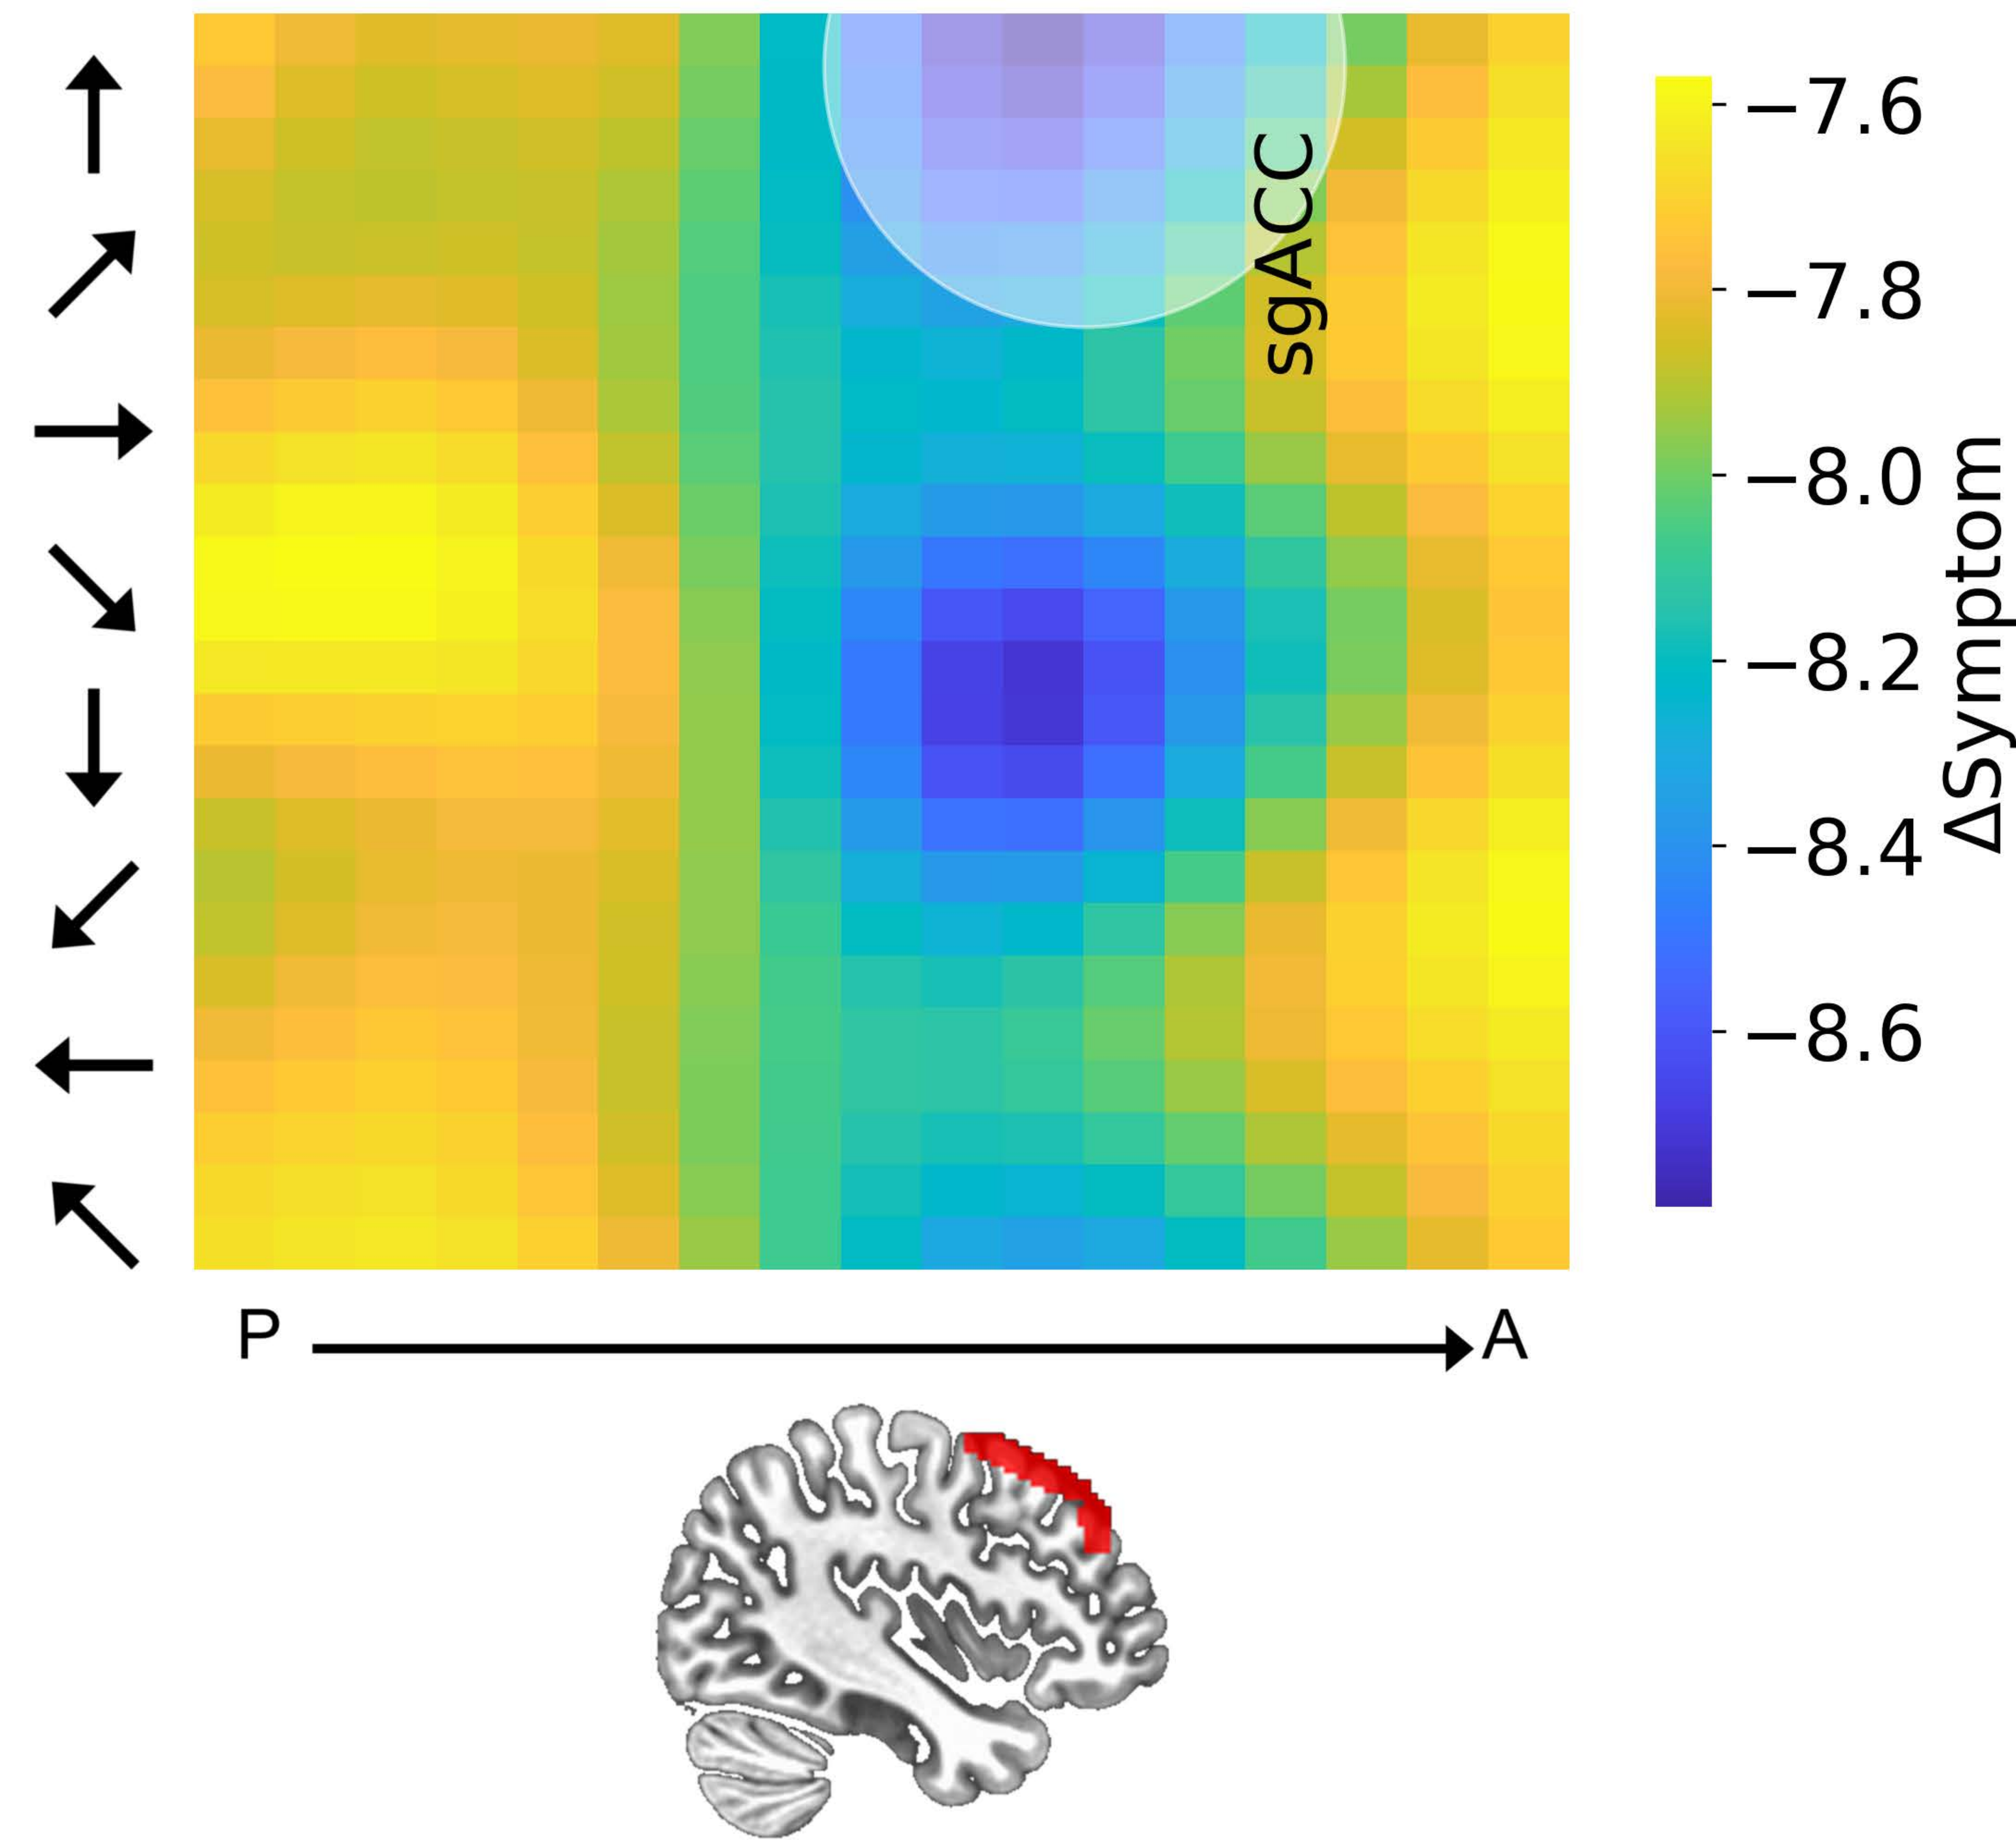



# NDARME189AXP\_madr\_left\_dlpfc

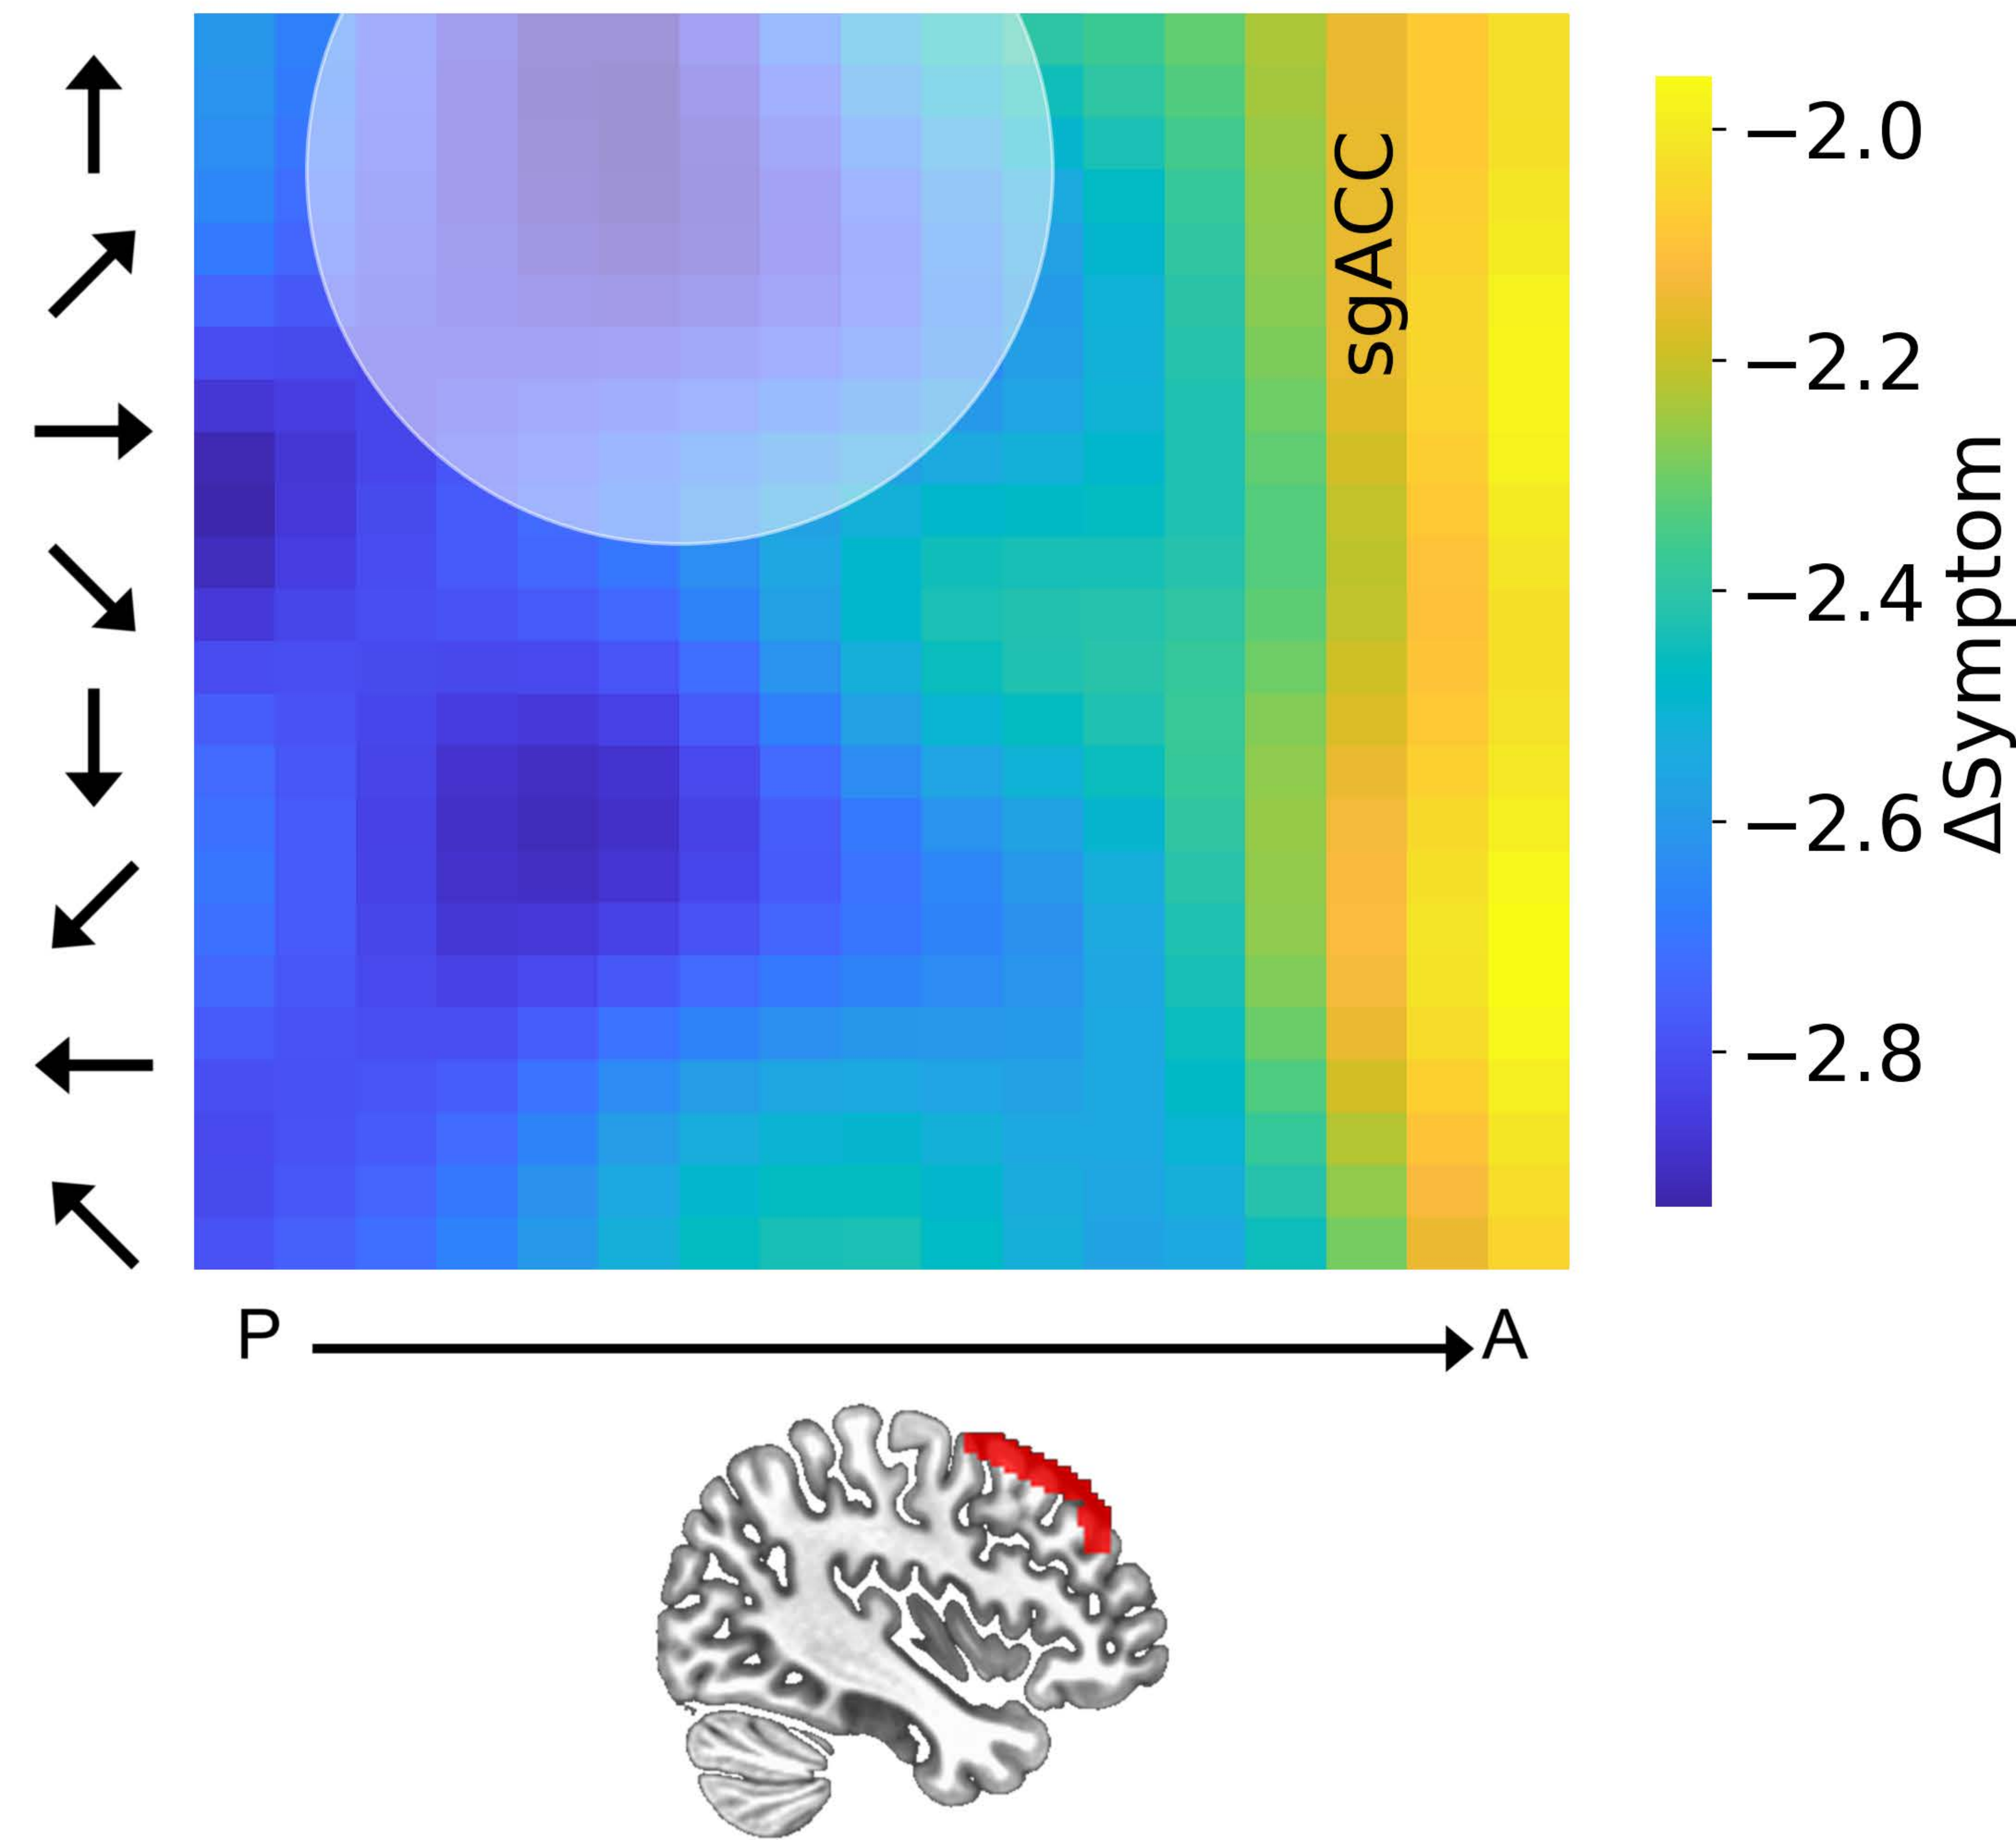



# NDARME335LZJ\_madr\_left\_dlpfc

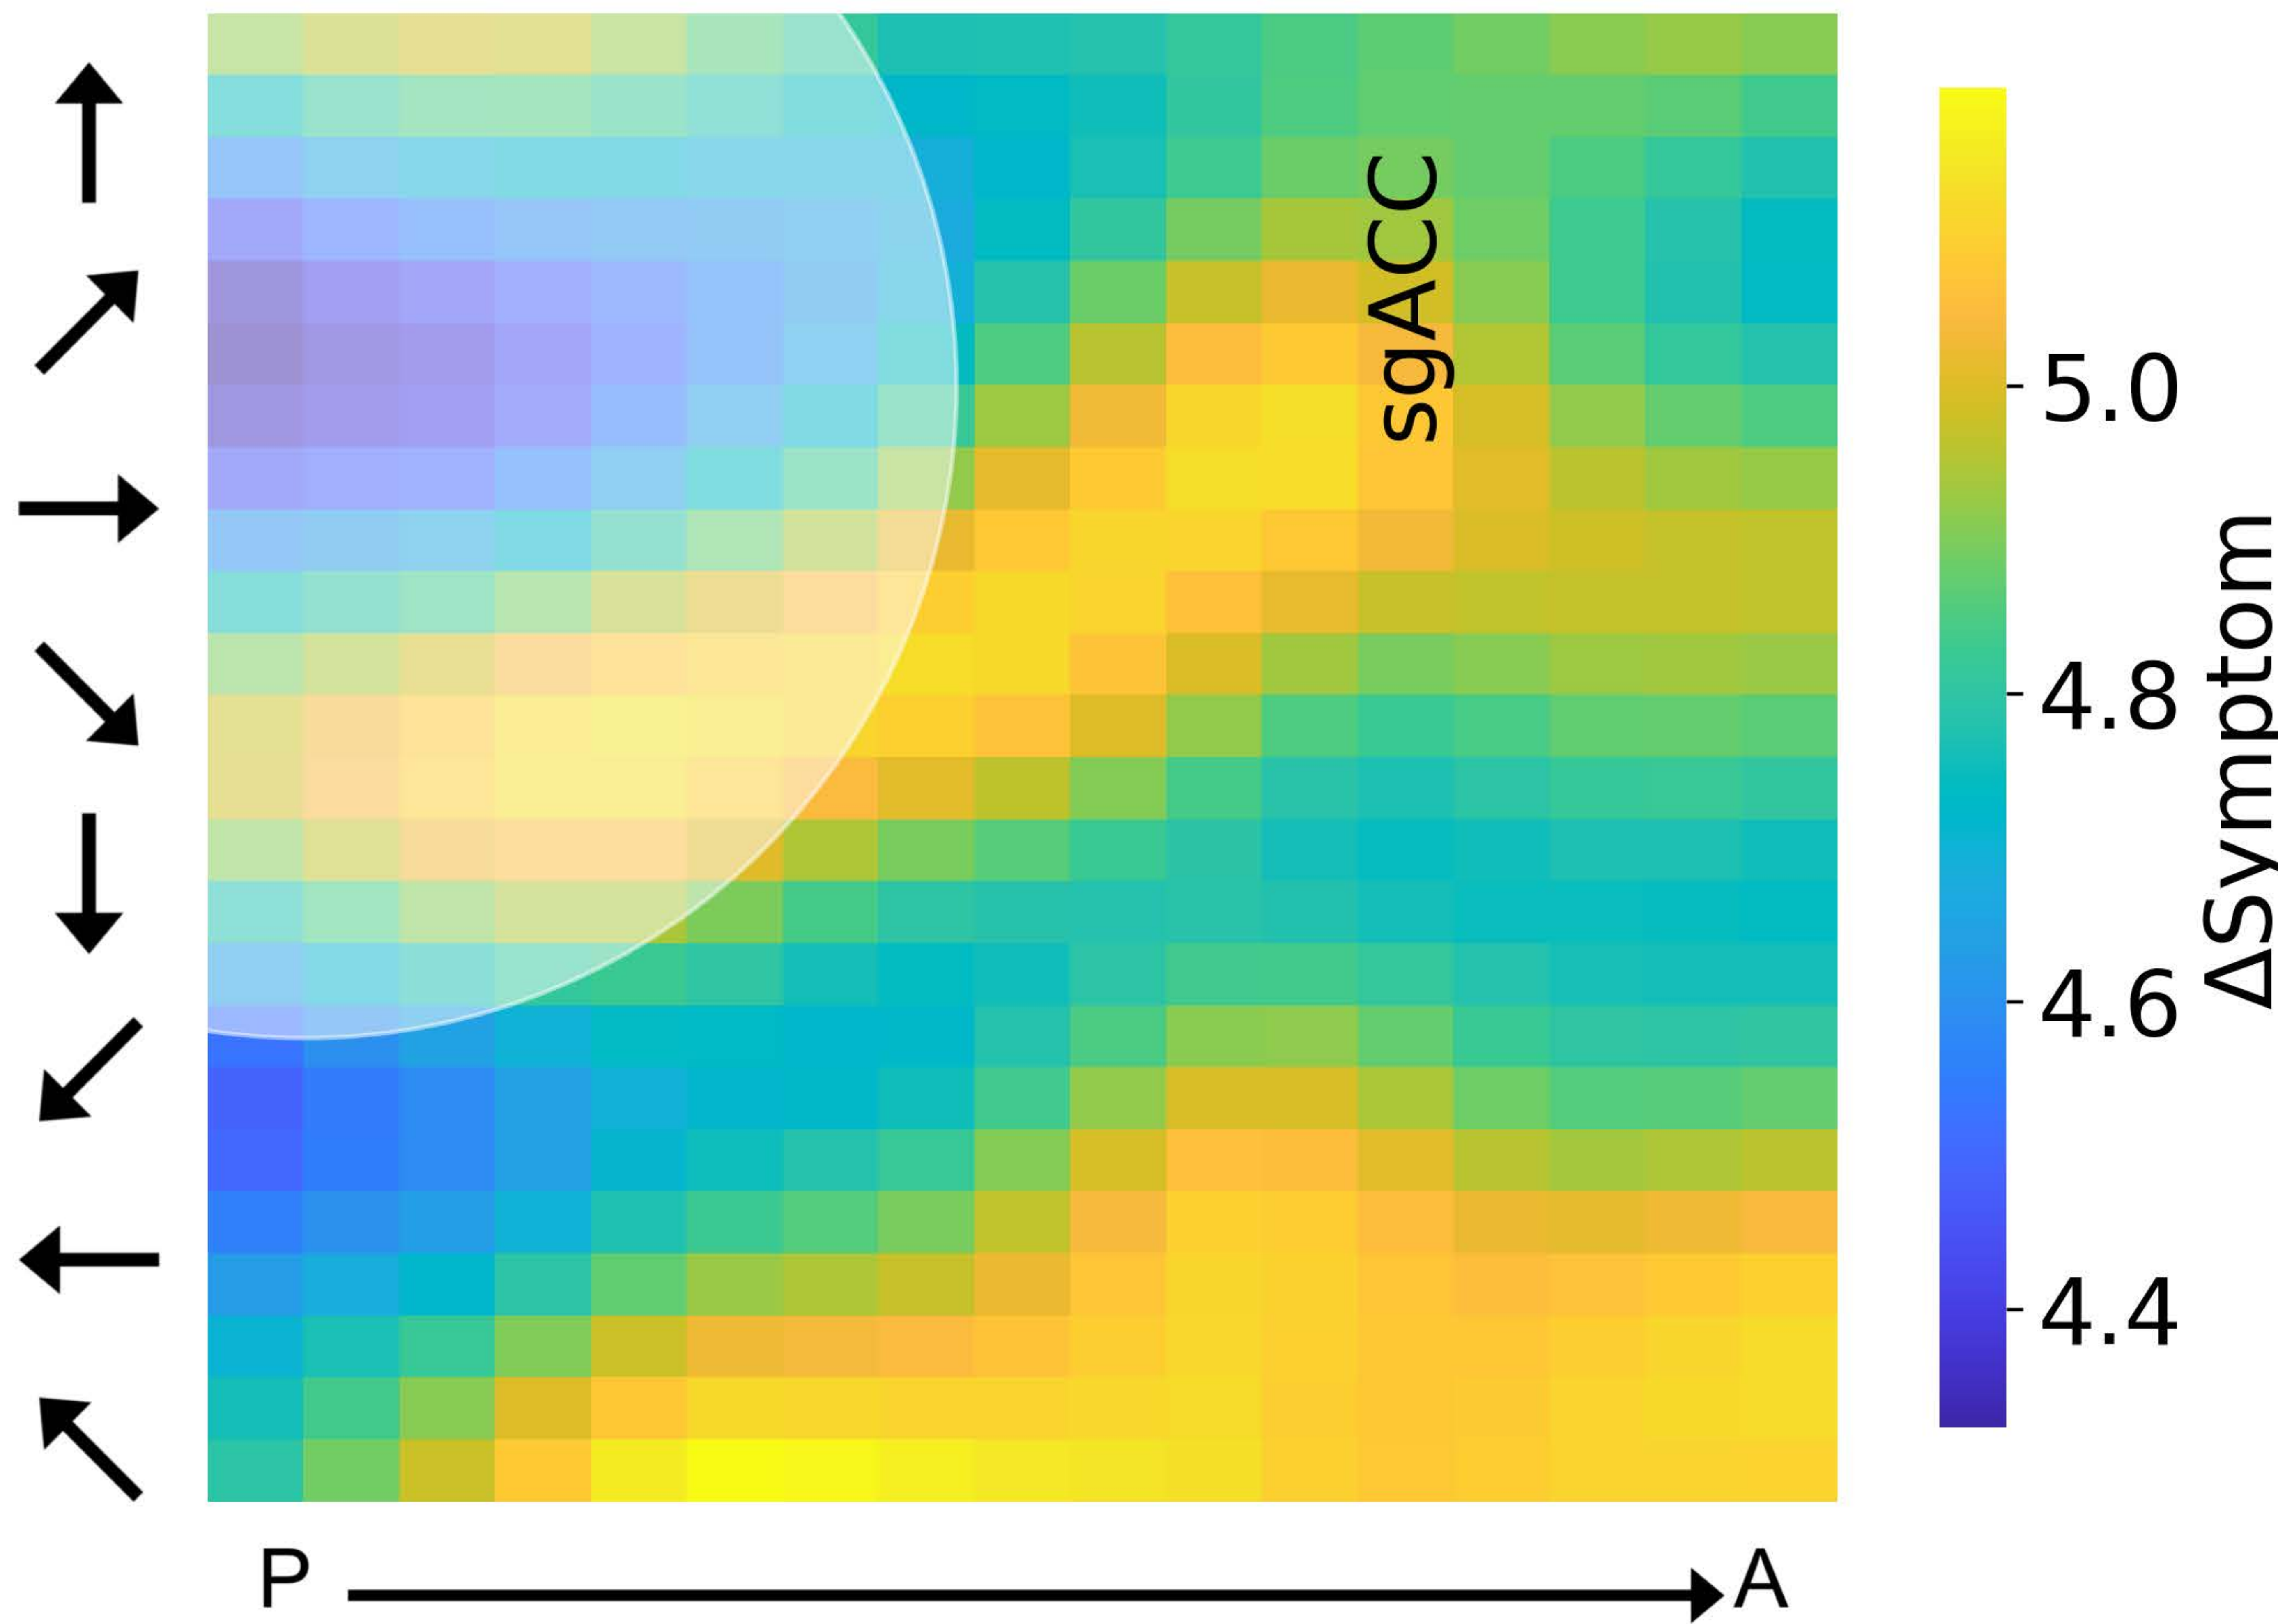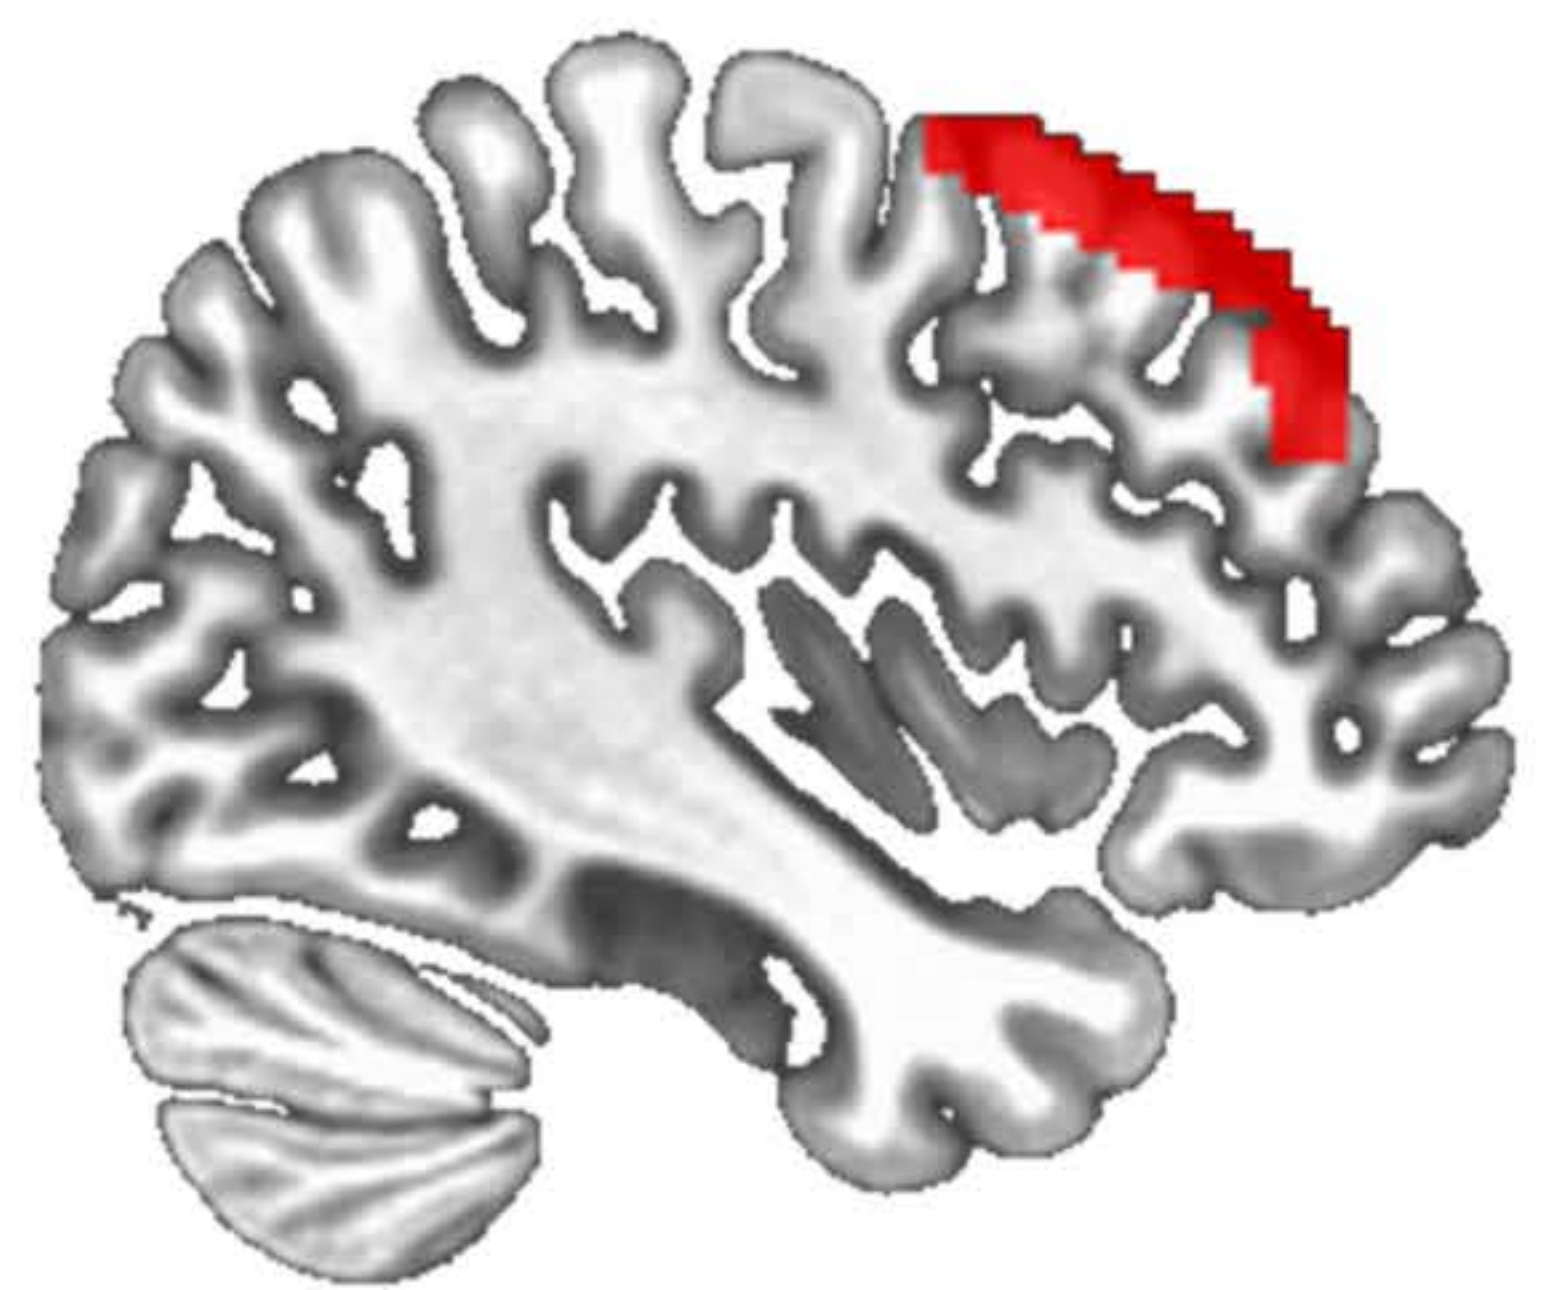



# NDARMF293AHT\_madrs\_left\_dlpfc

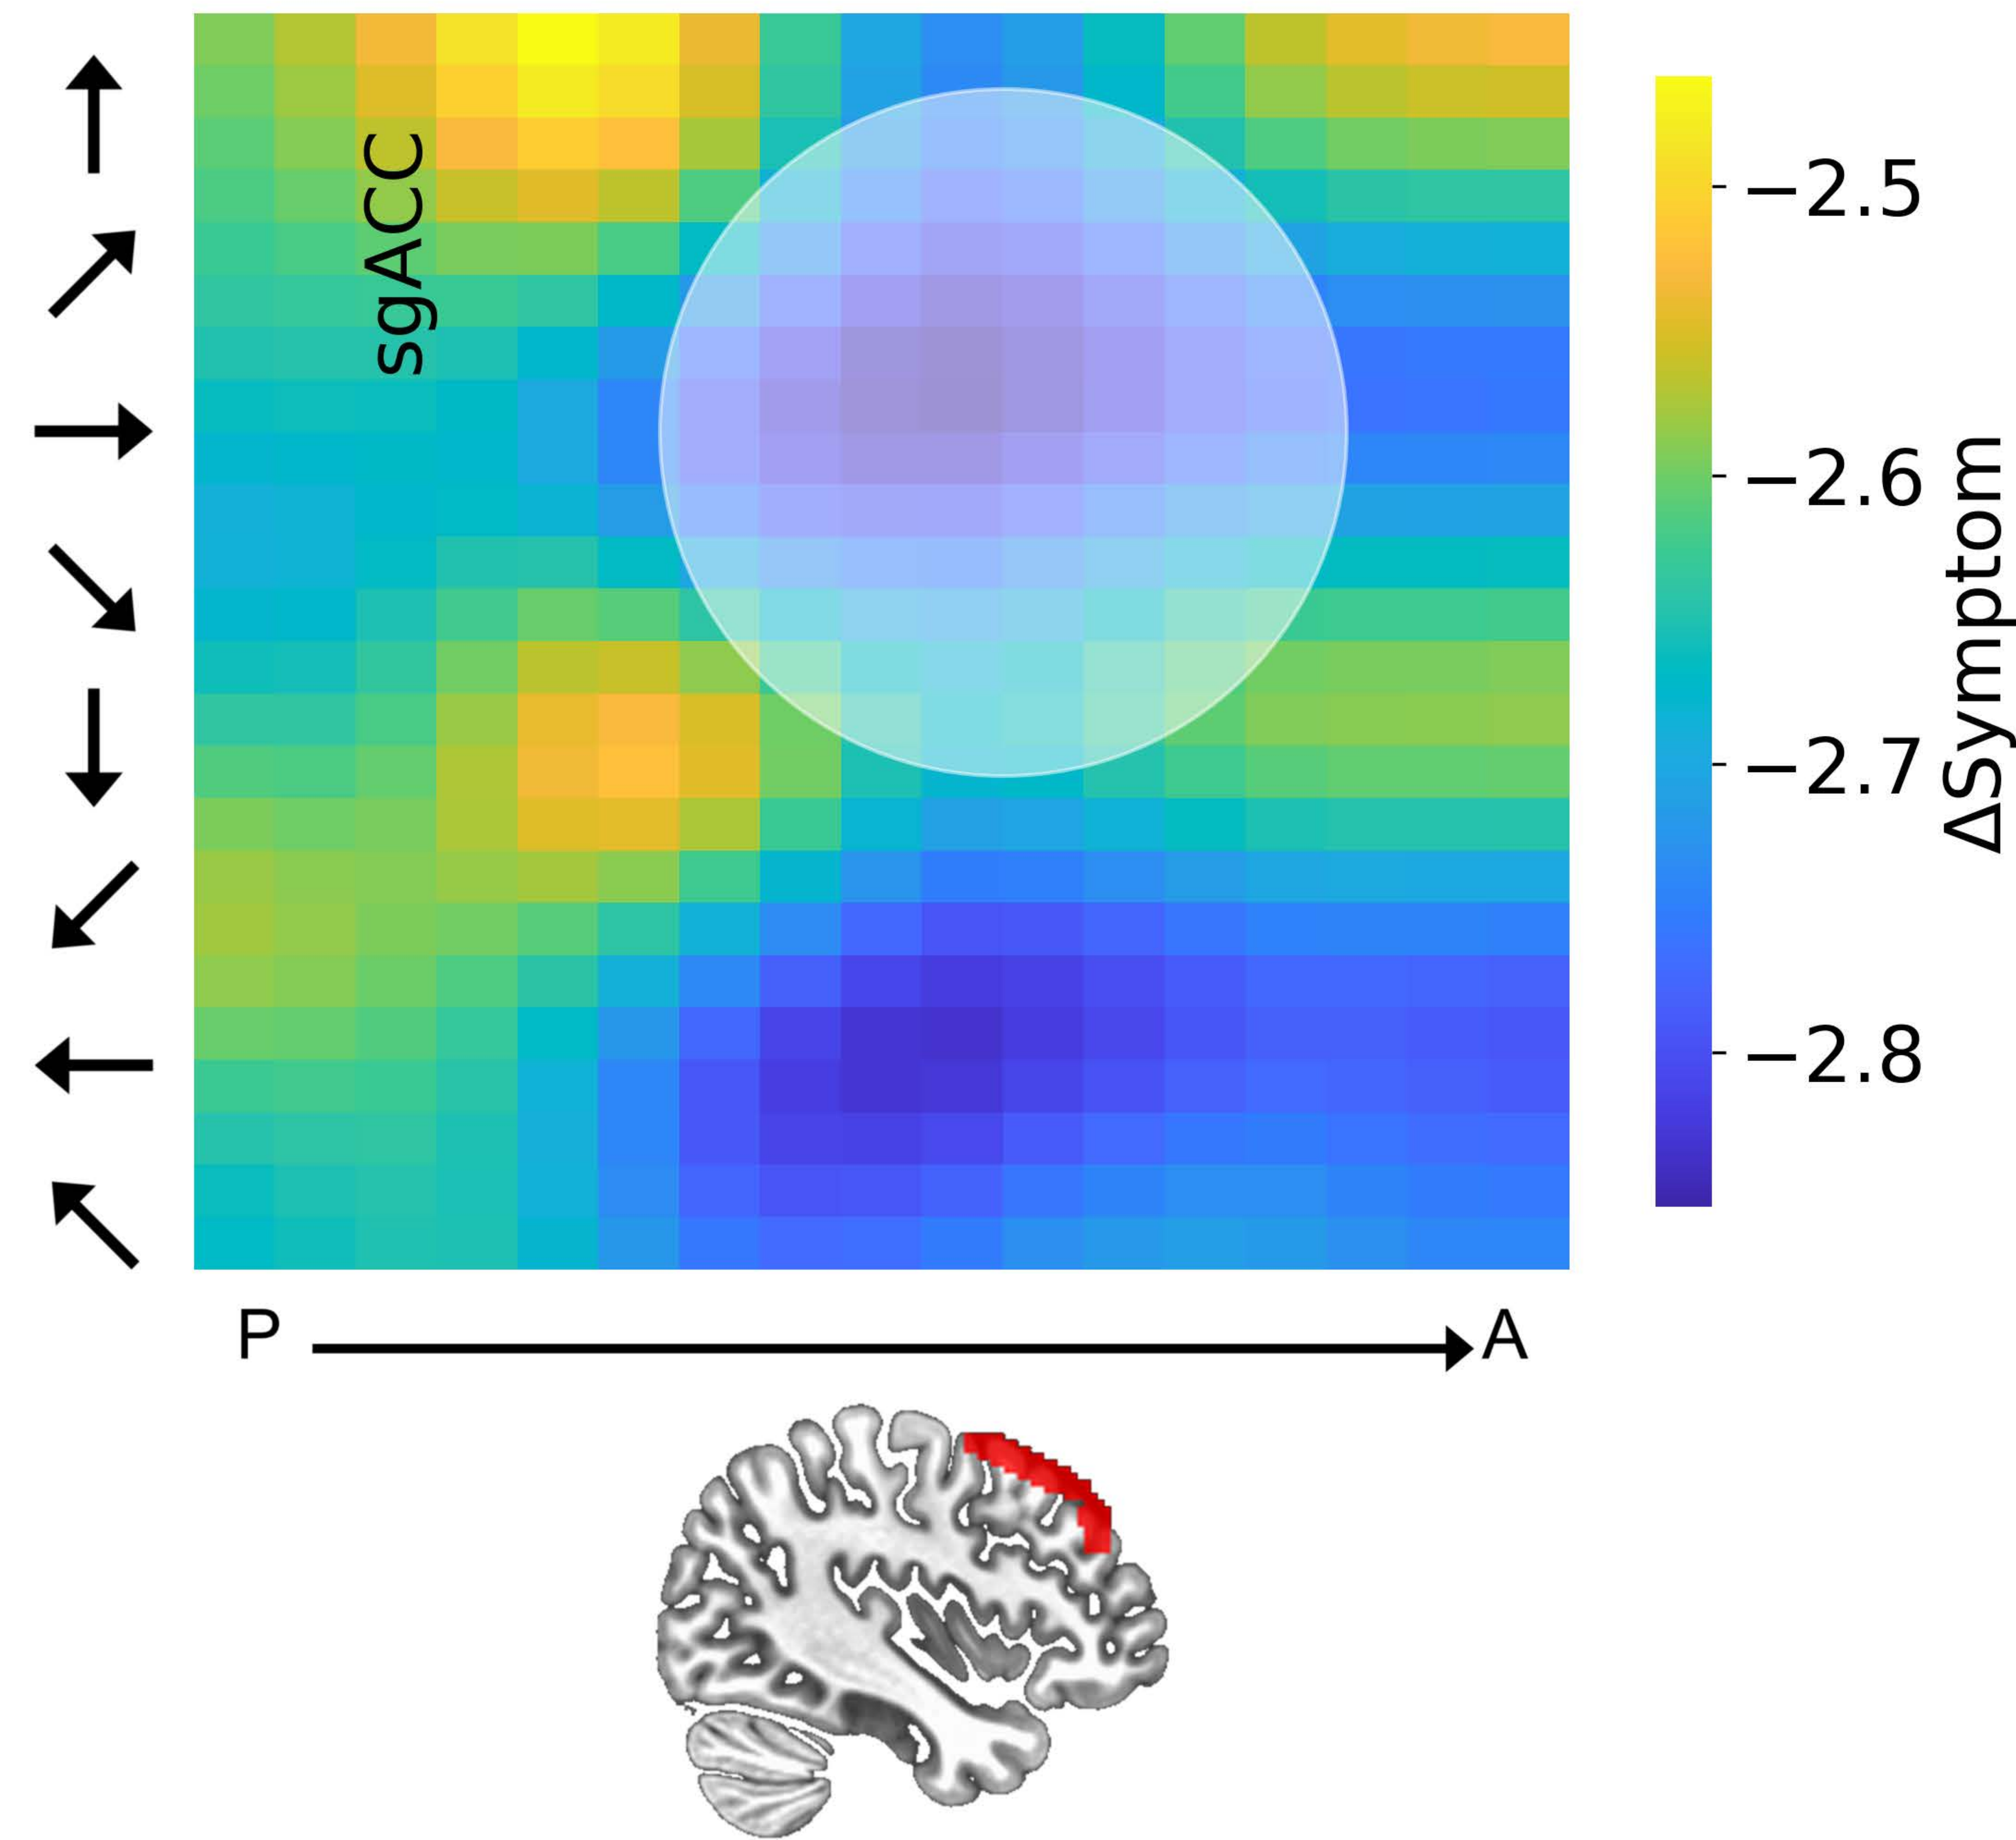



# NDARMK972BFE\_madrs\_left\_dlpfc

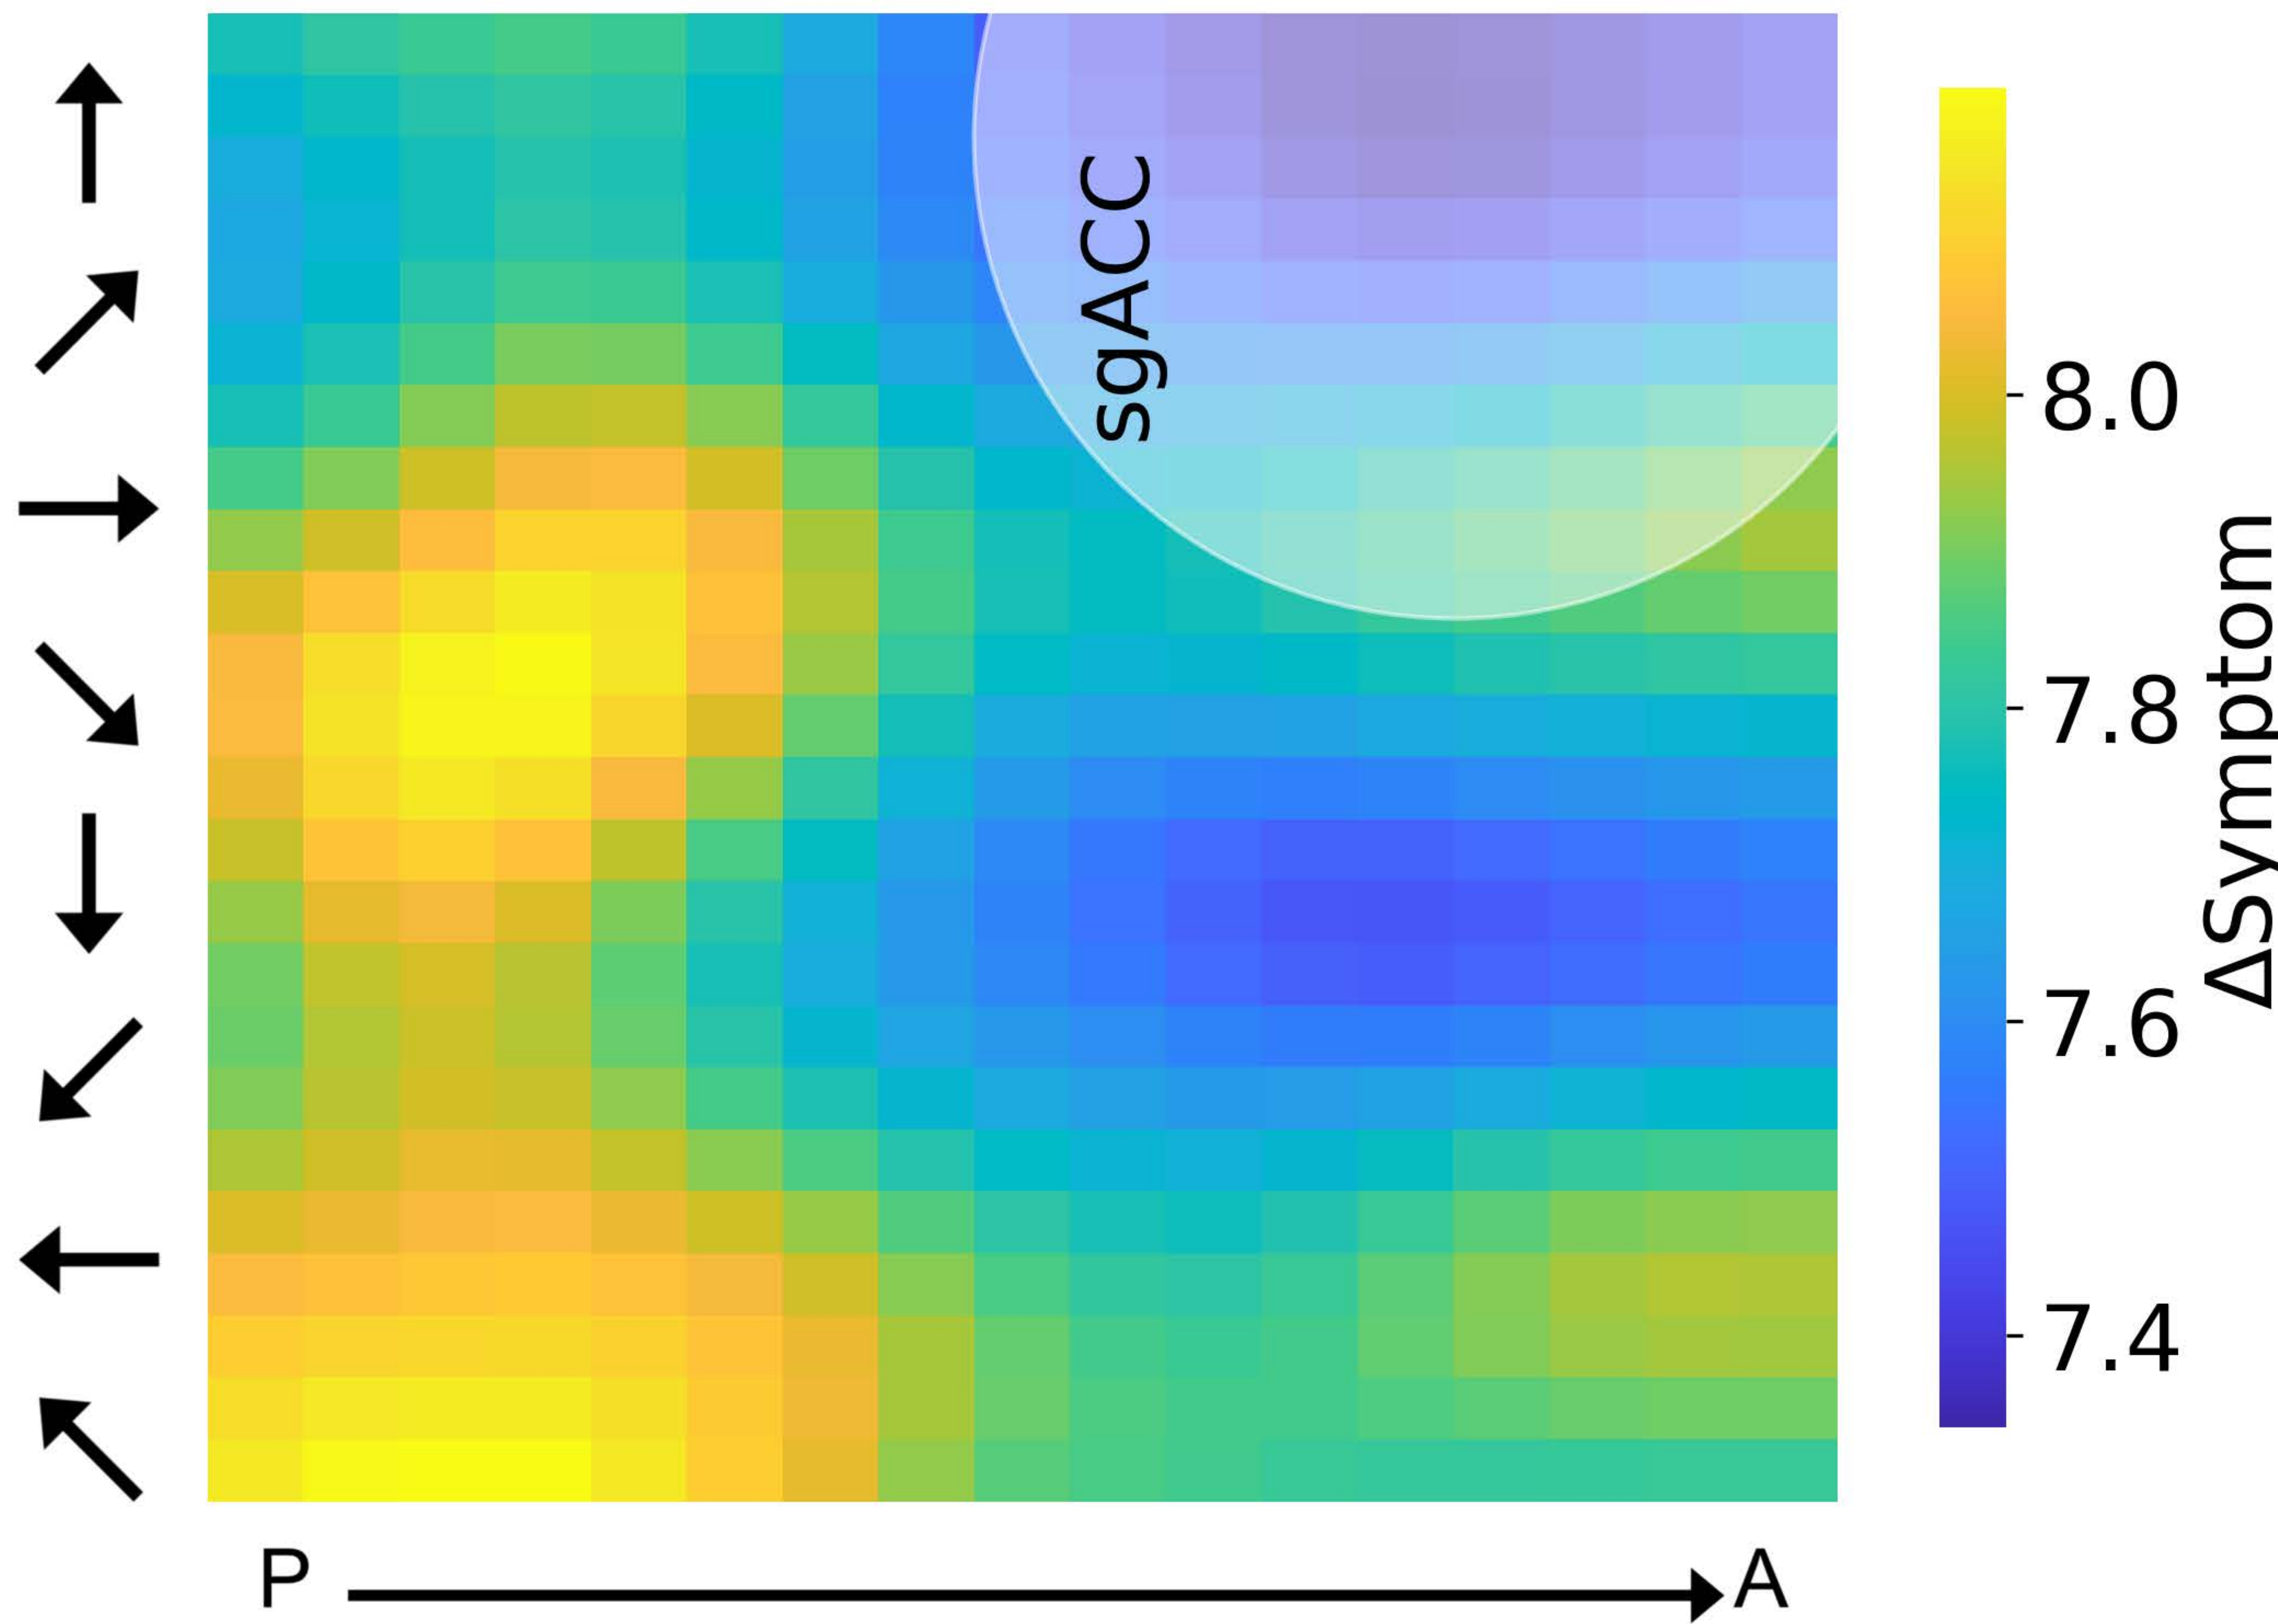



# NDARNA955LXG\_madr\_left\_dlpfc

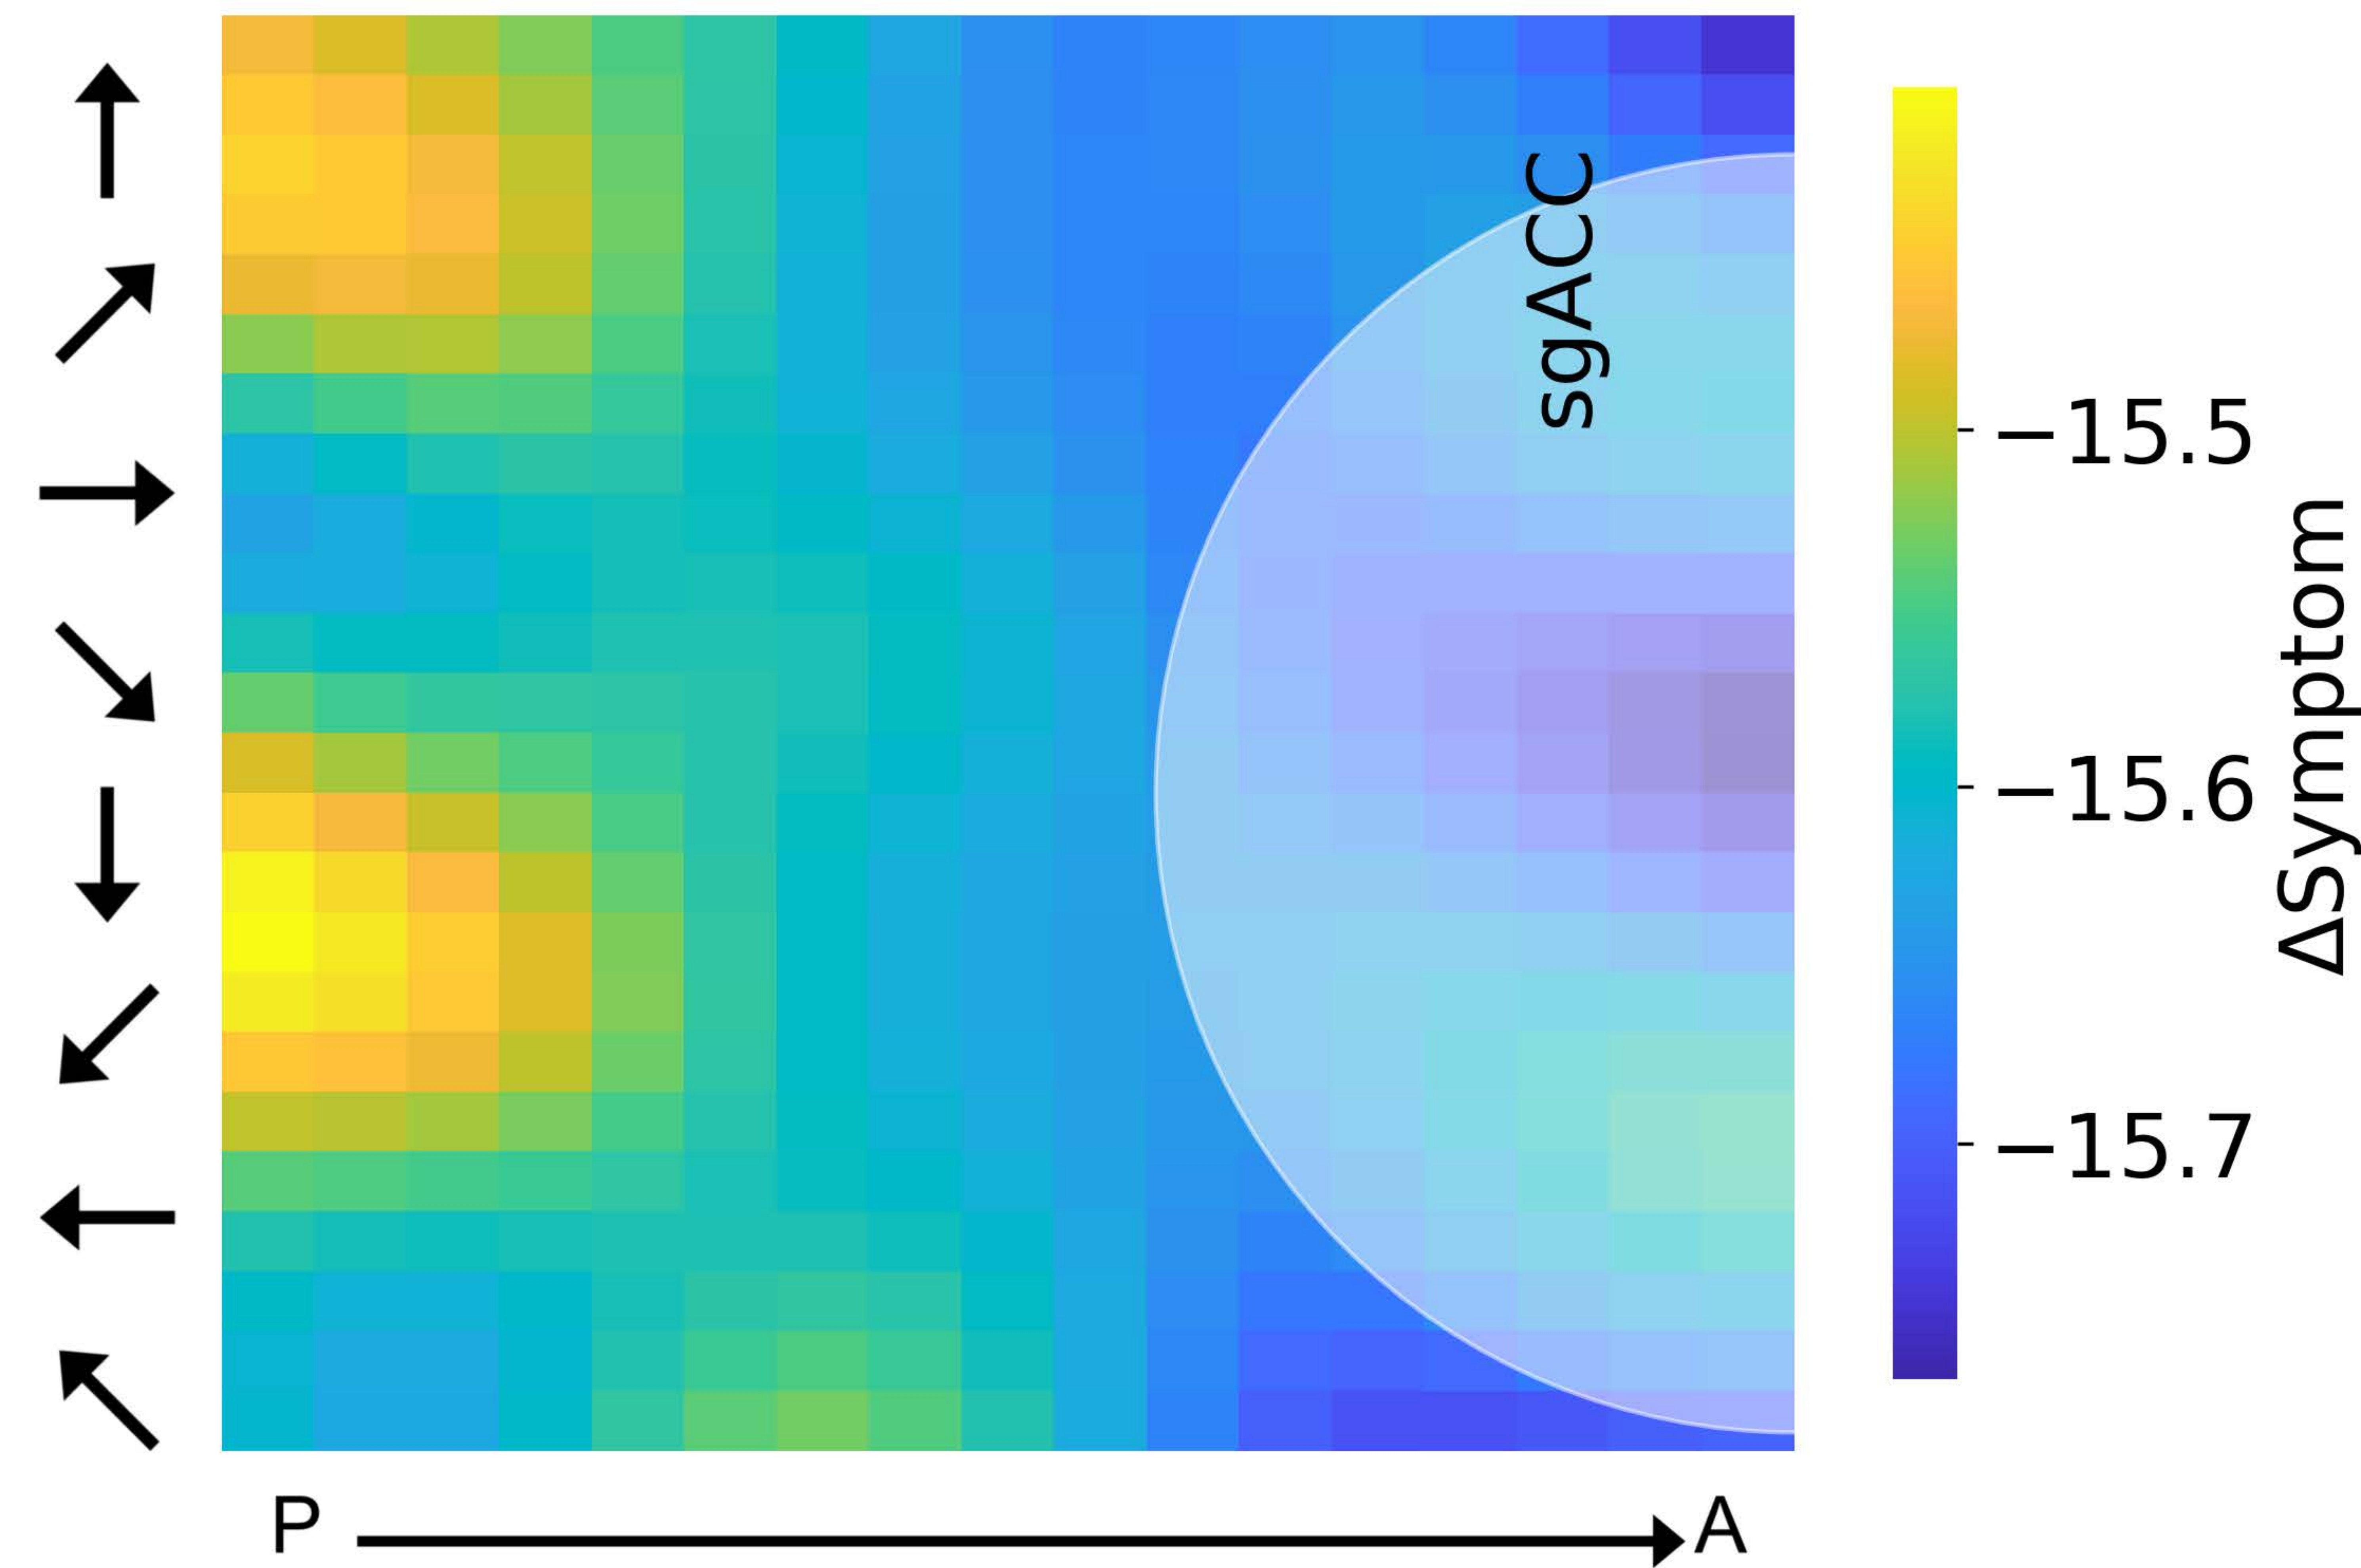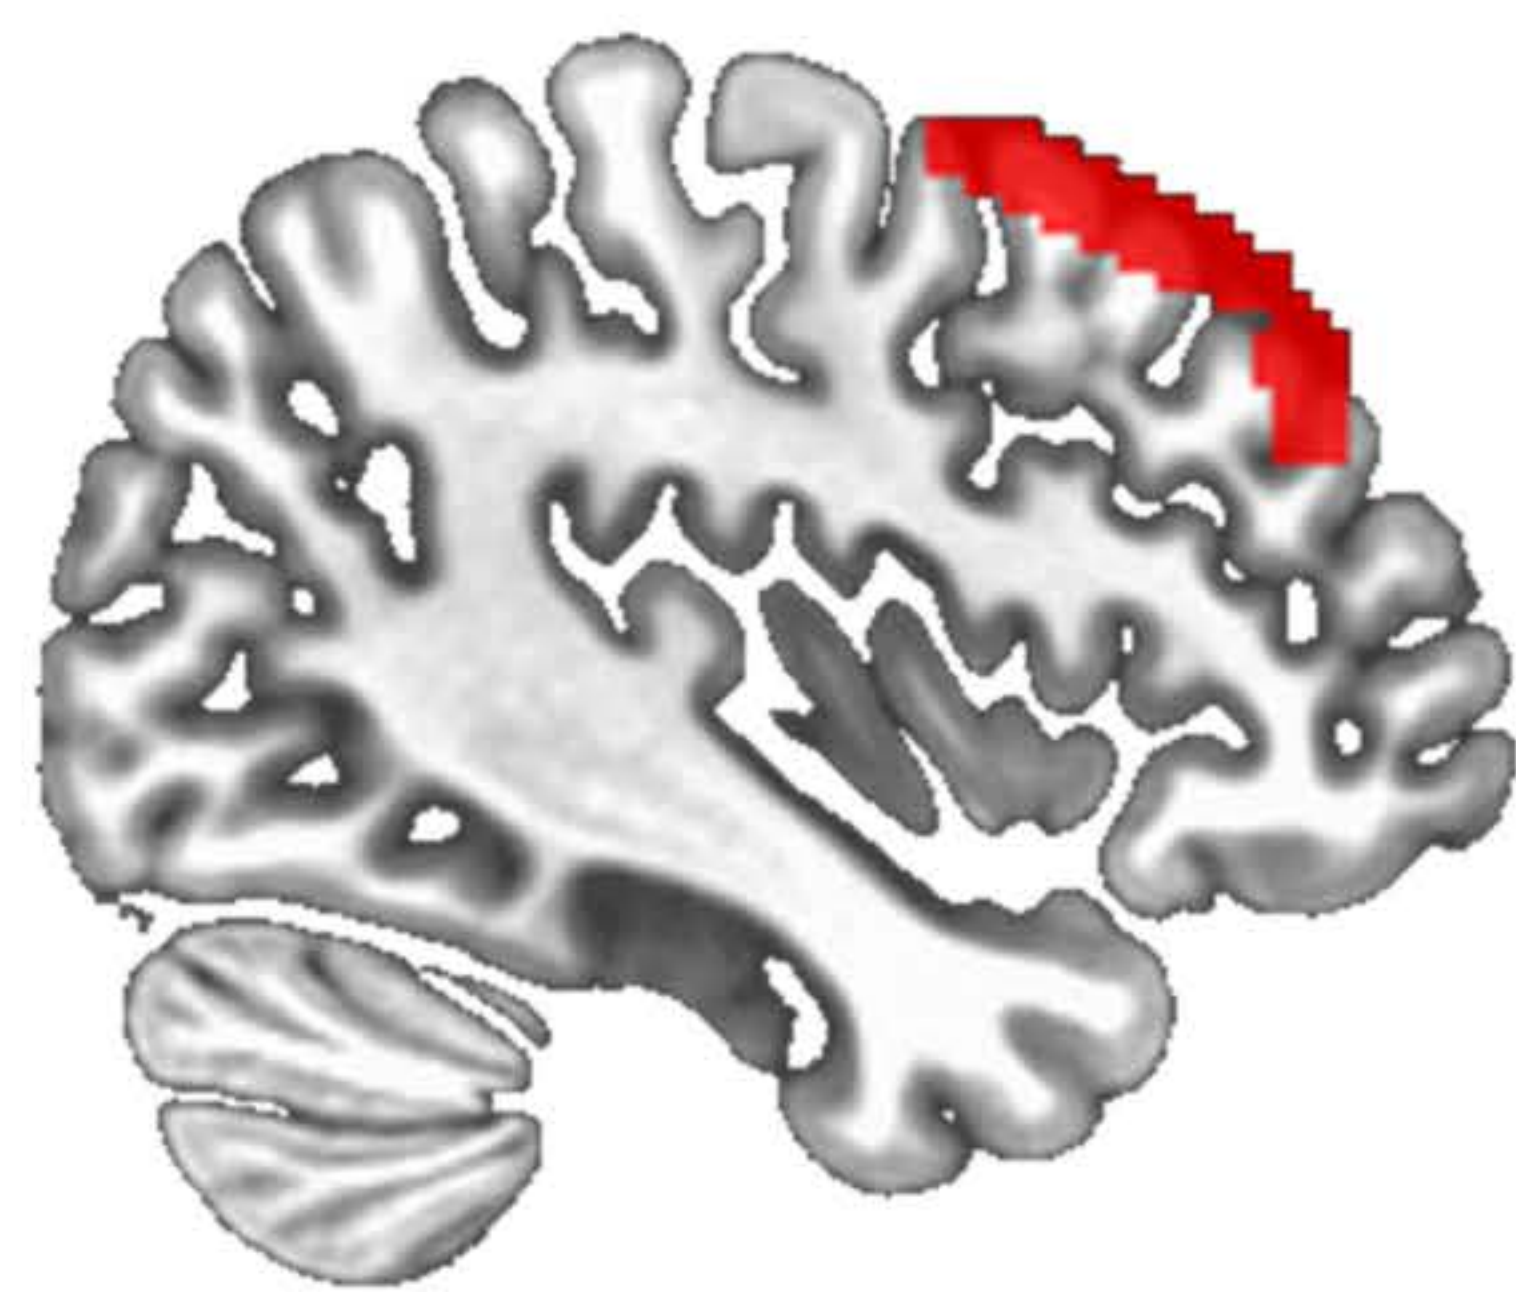



# NDARNR764NAK\_madrs\_left\_dlpfc

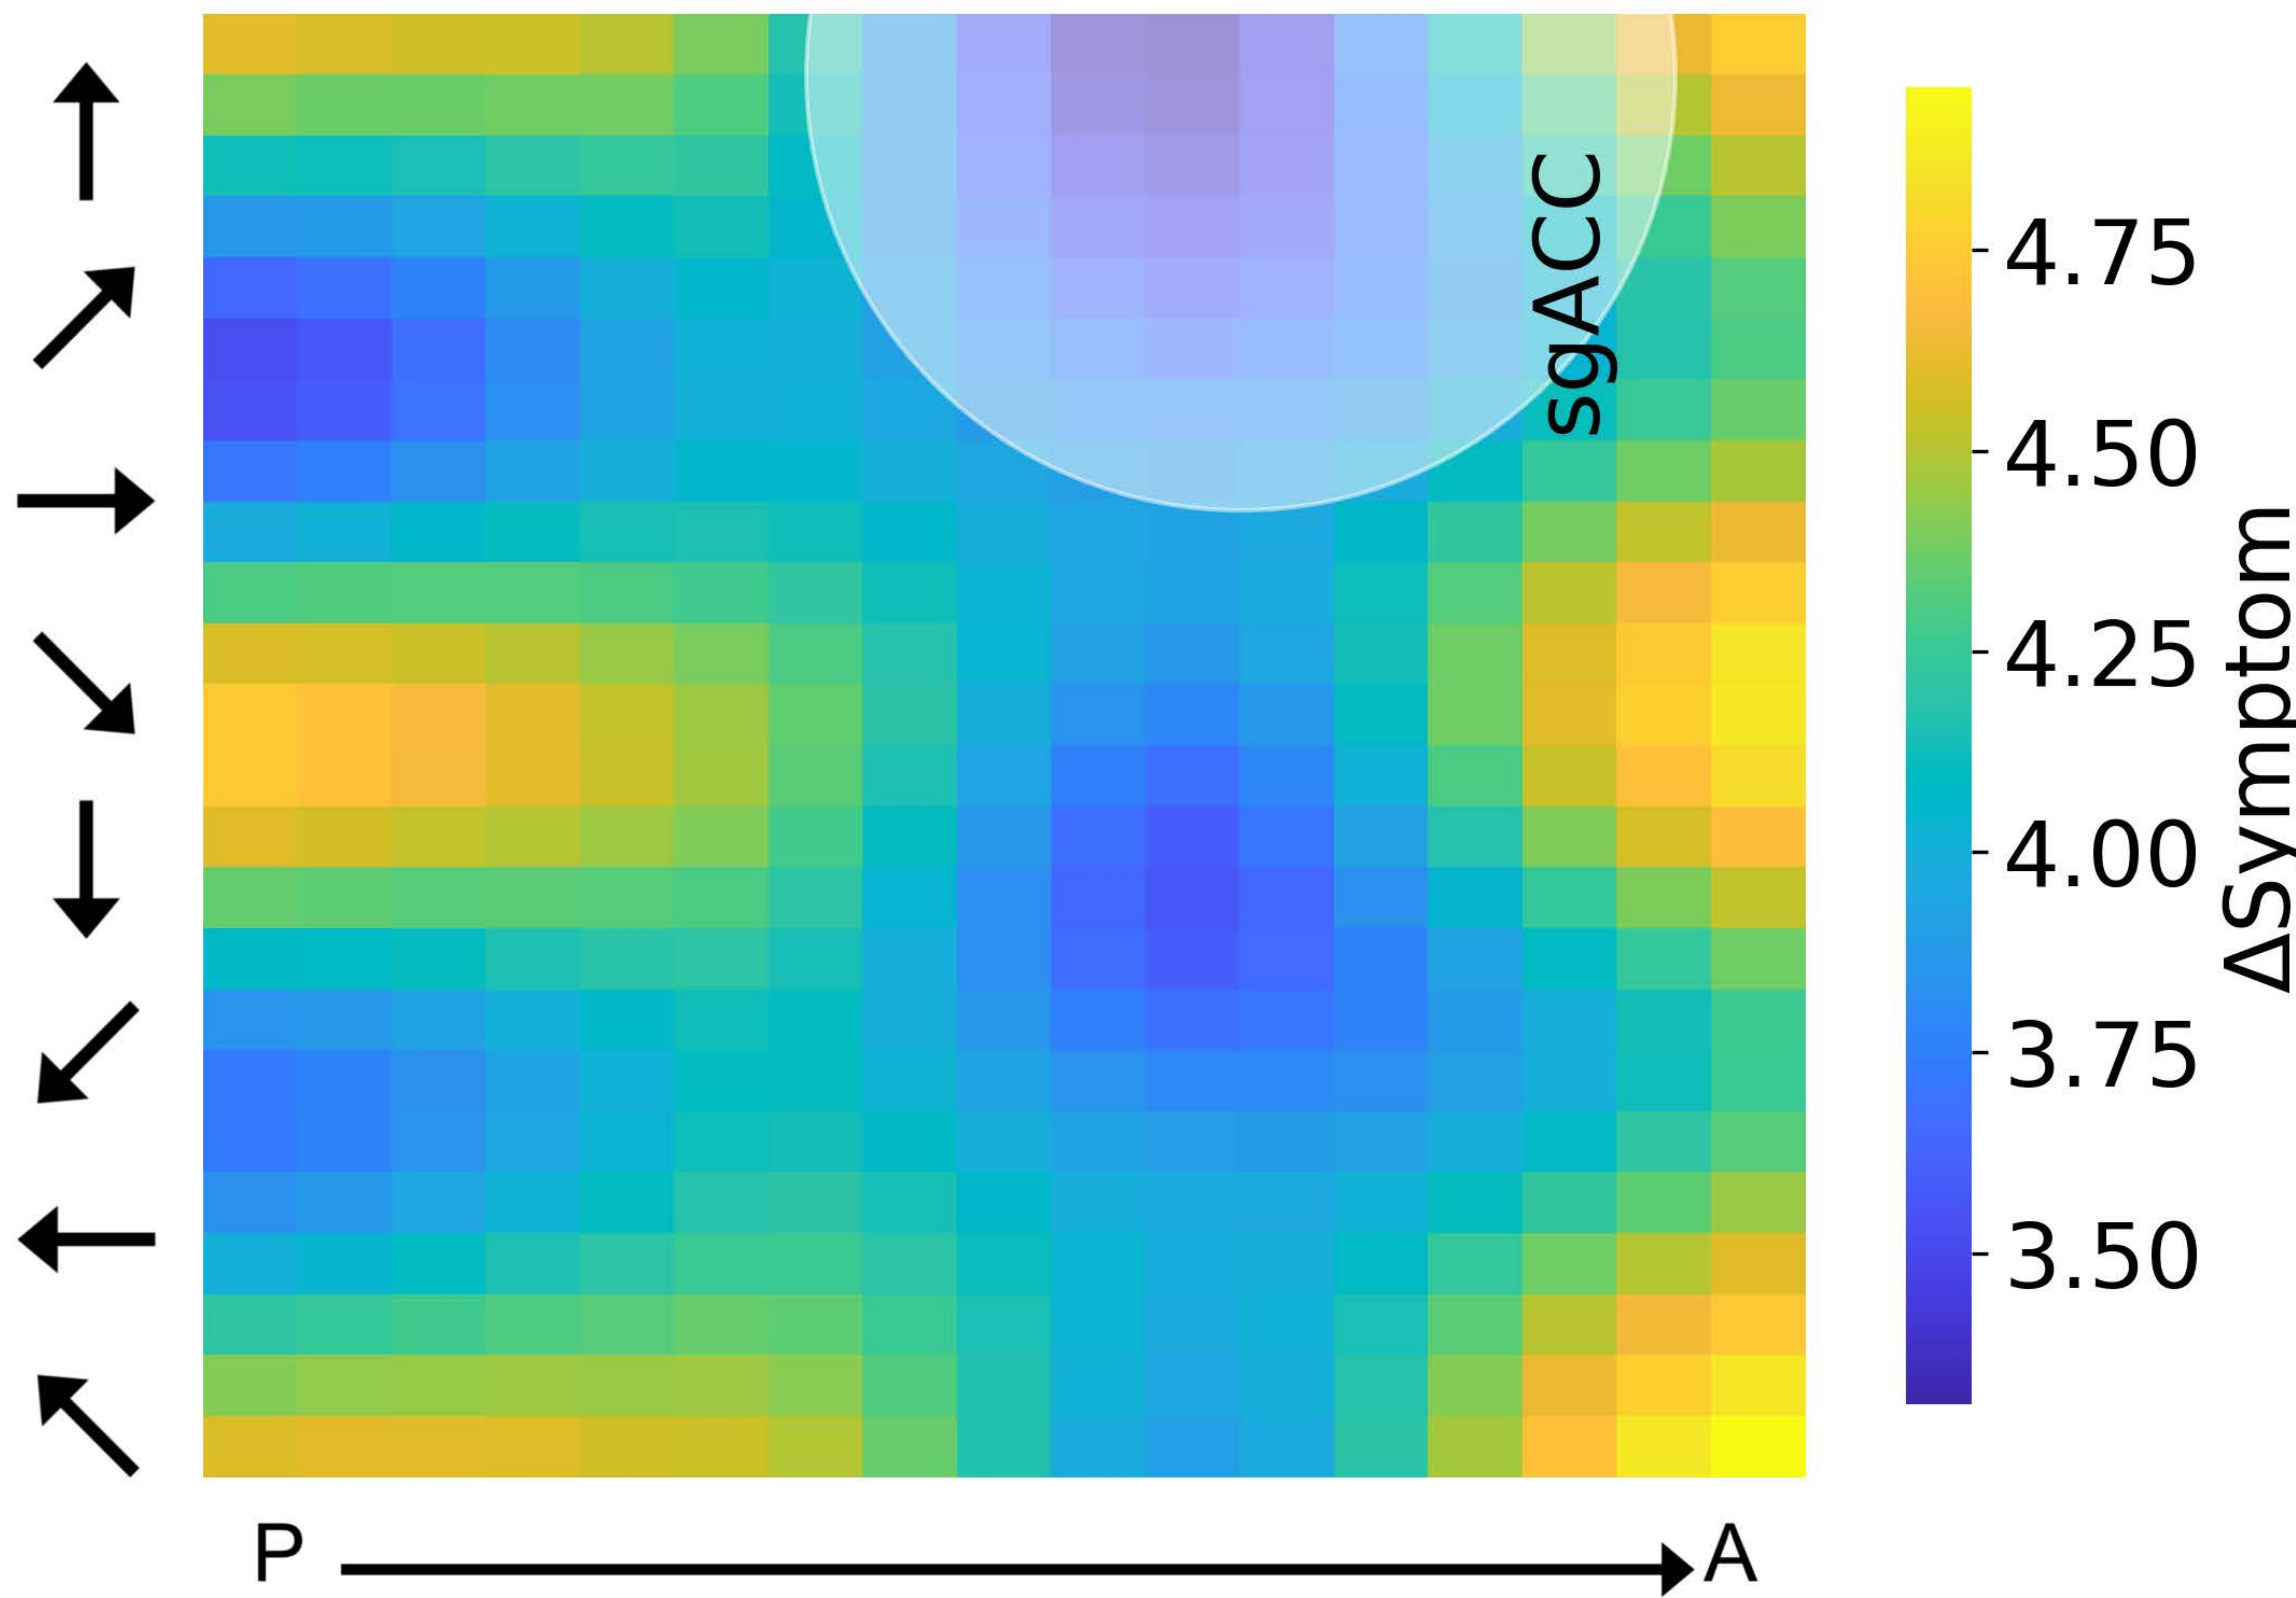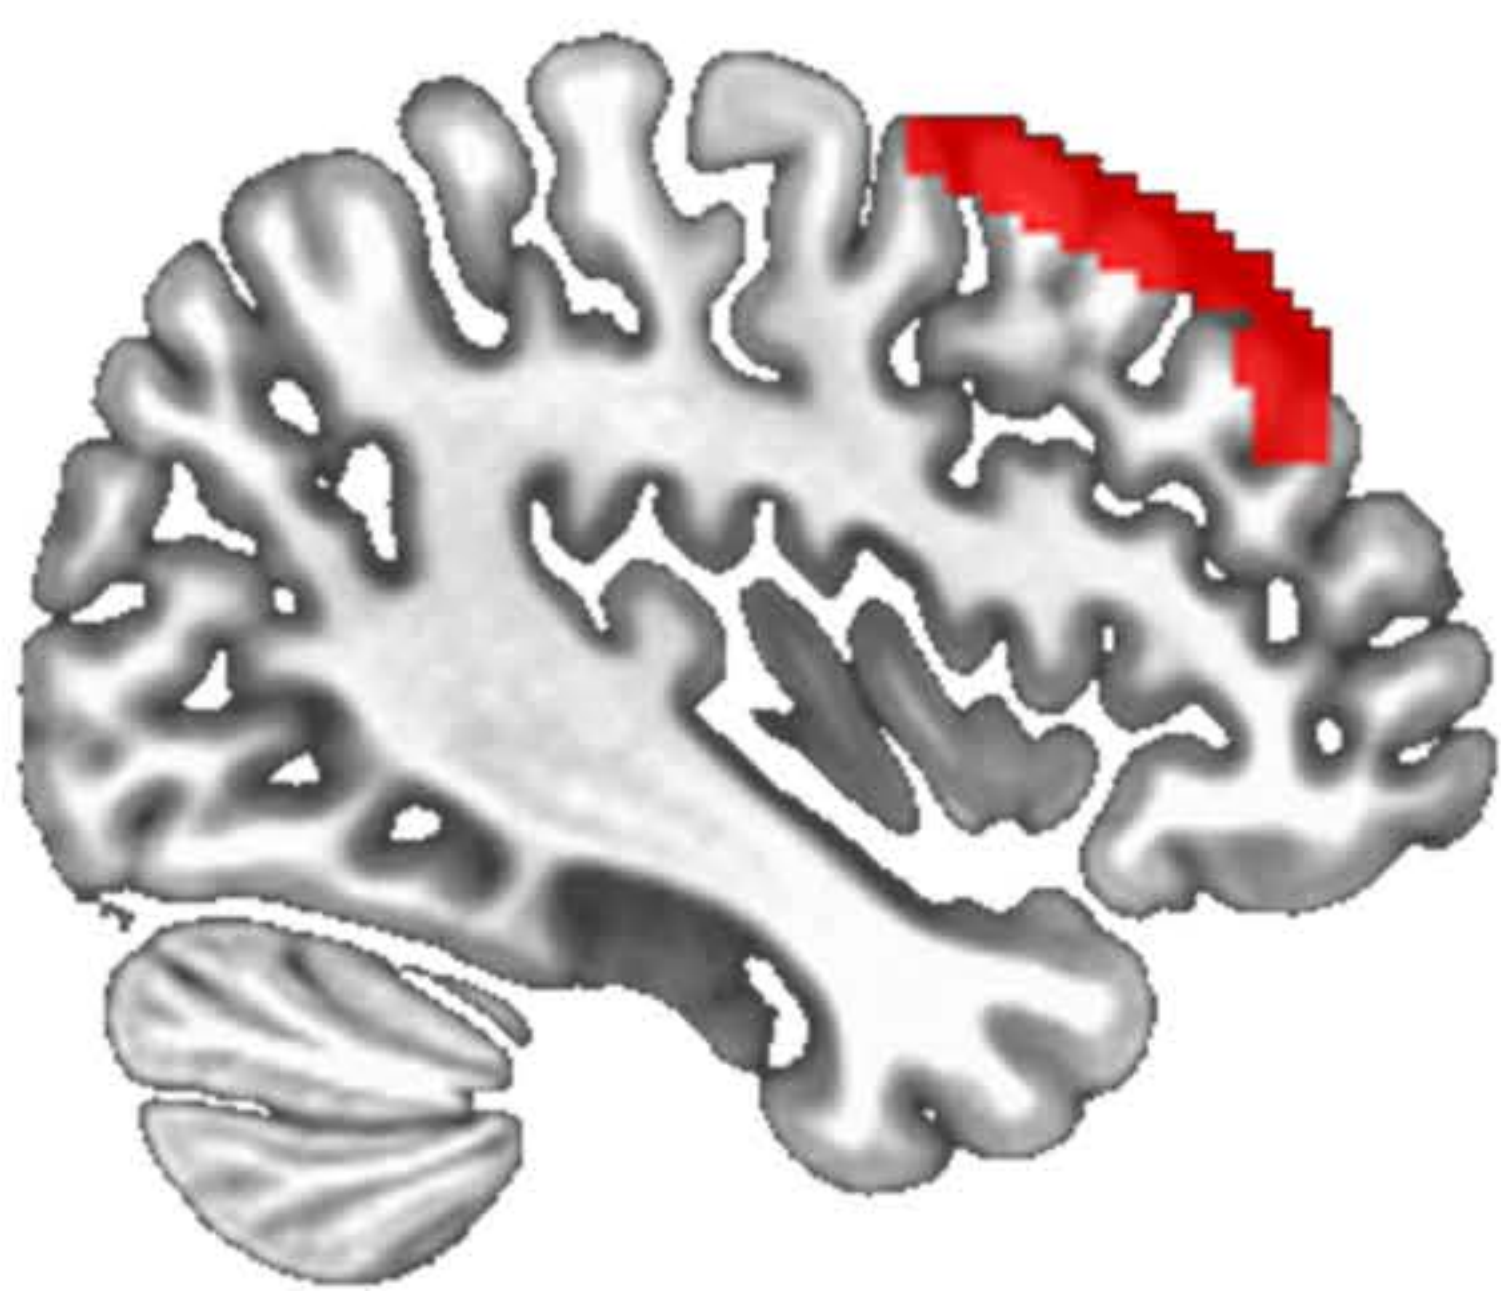



# NDARNU180HL3\_madrs\_left\_dlpfc

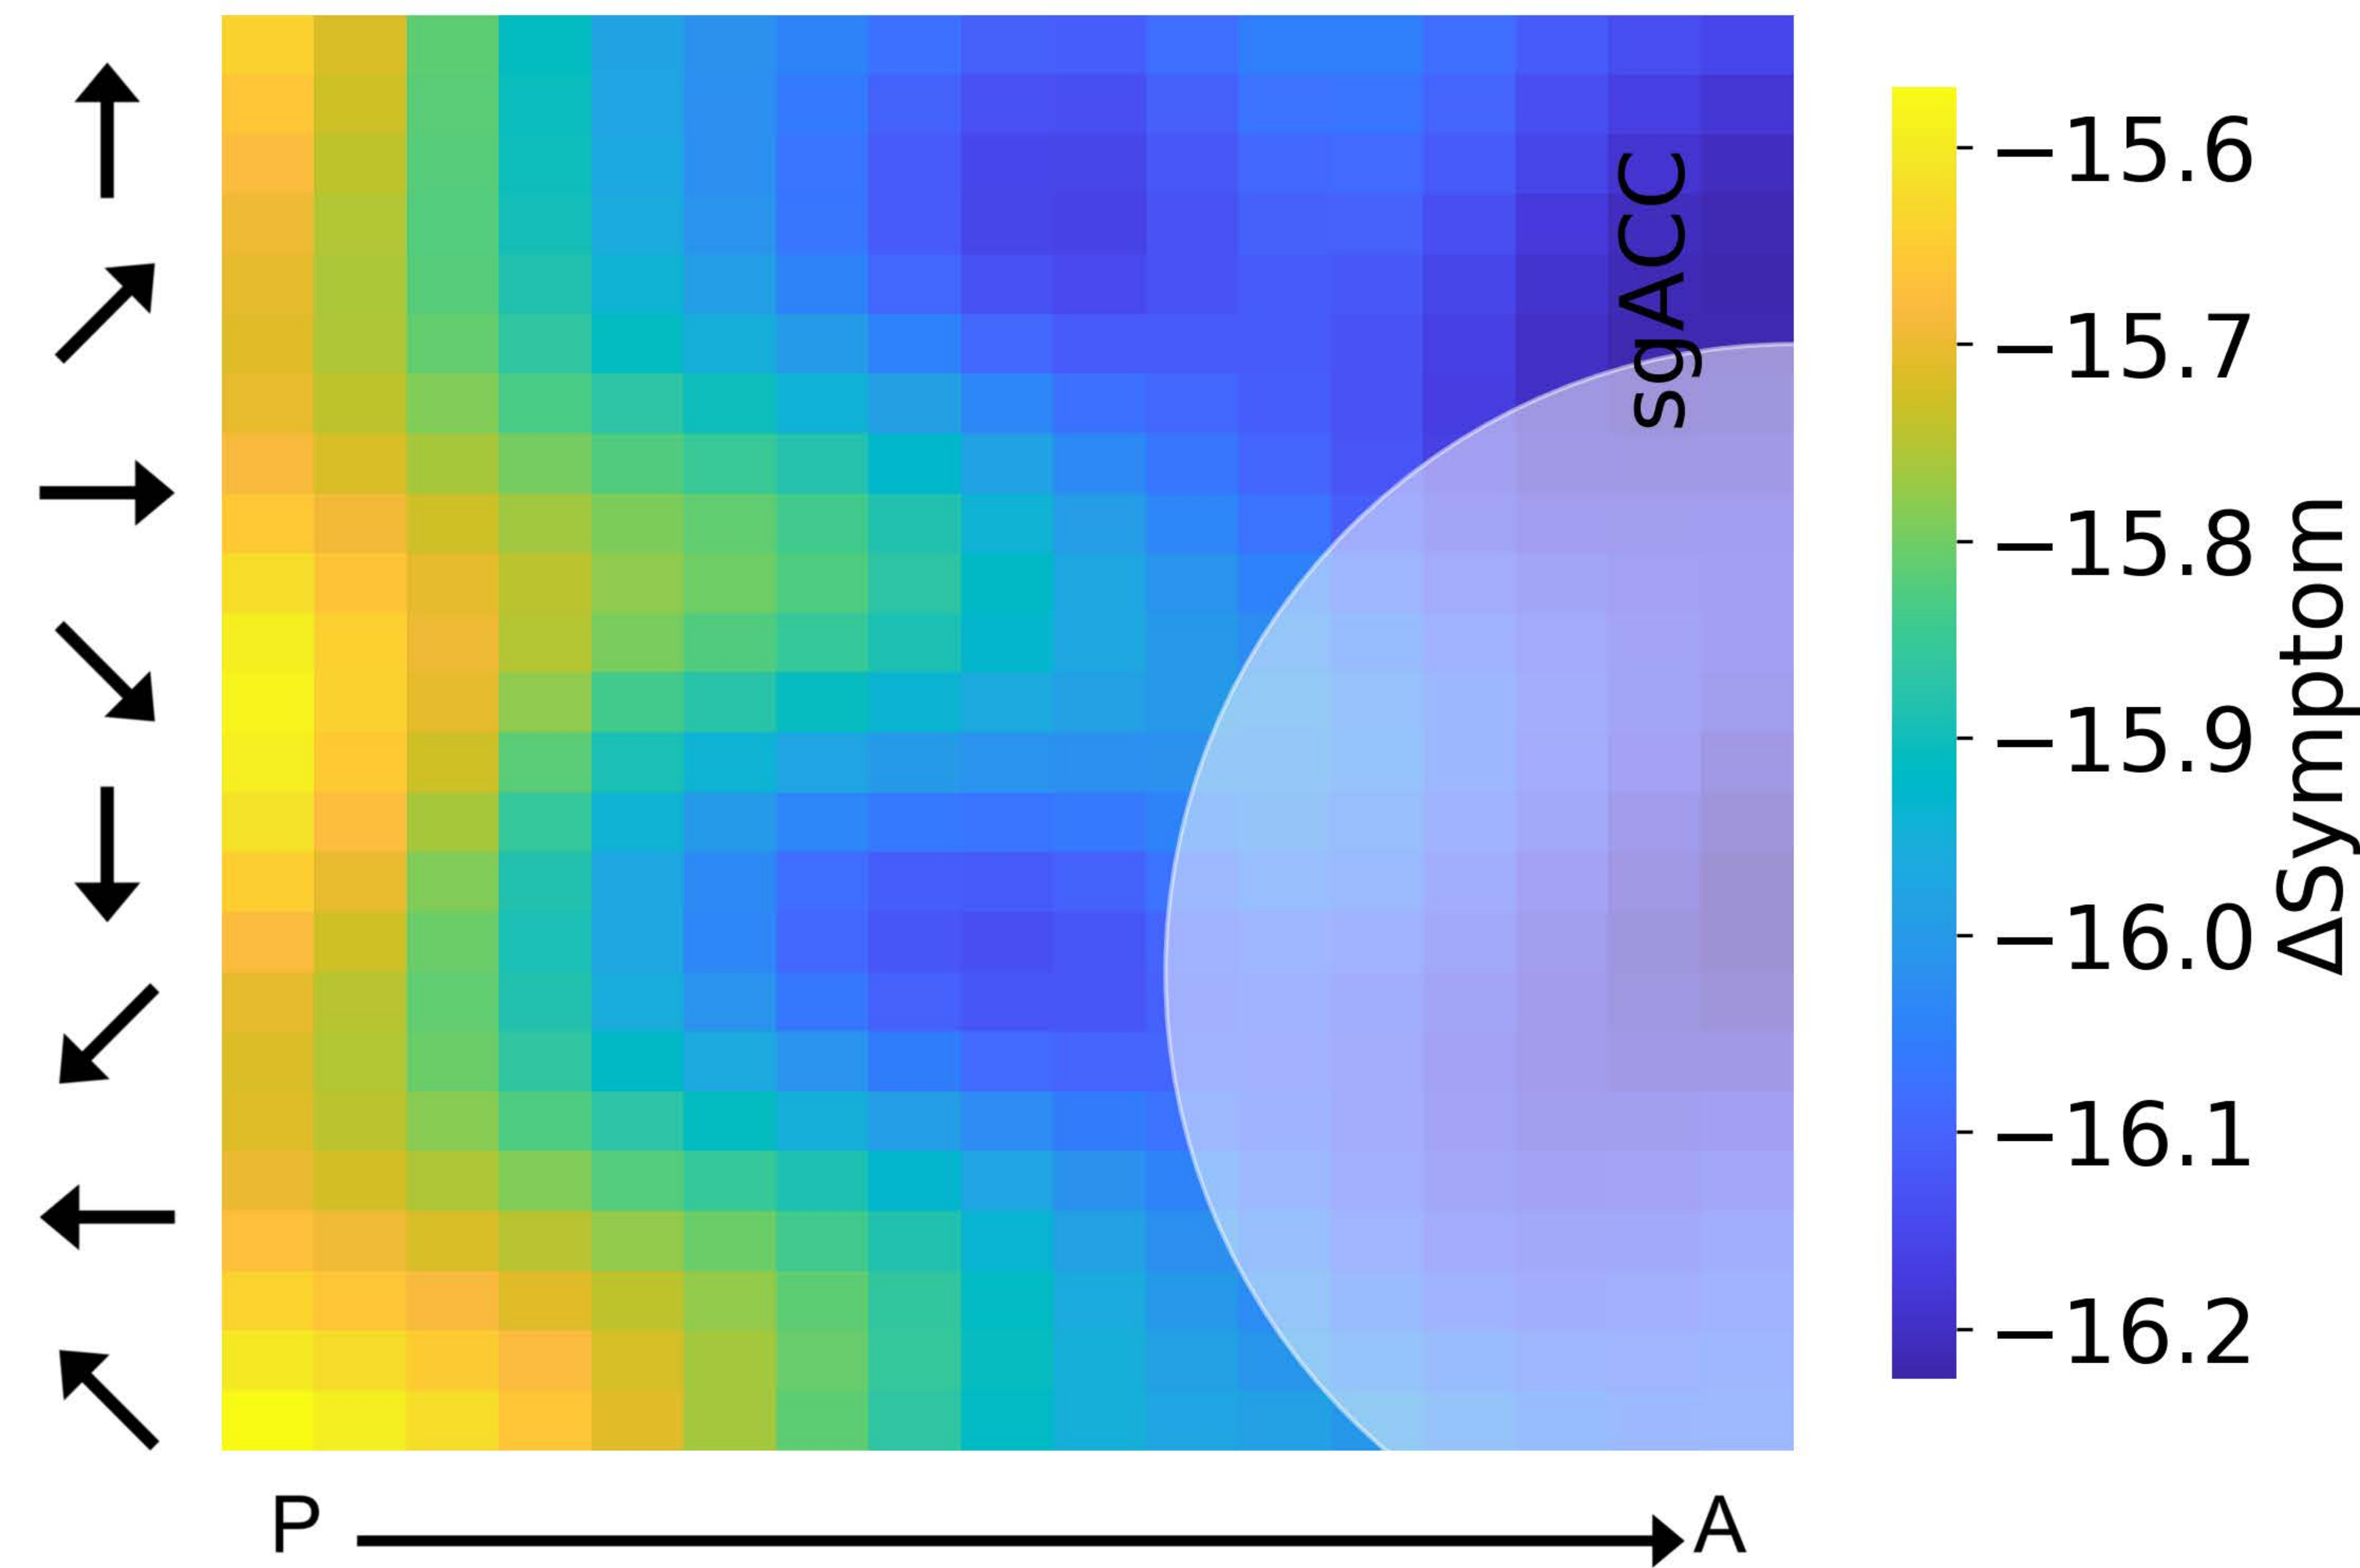



# NDARNZ824XHB\_madrs\_left\_dlpfc

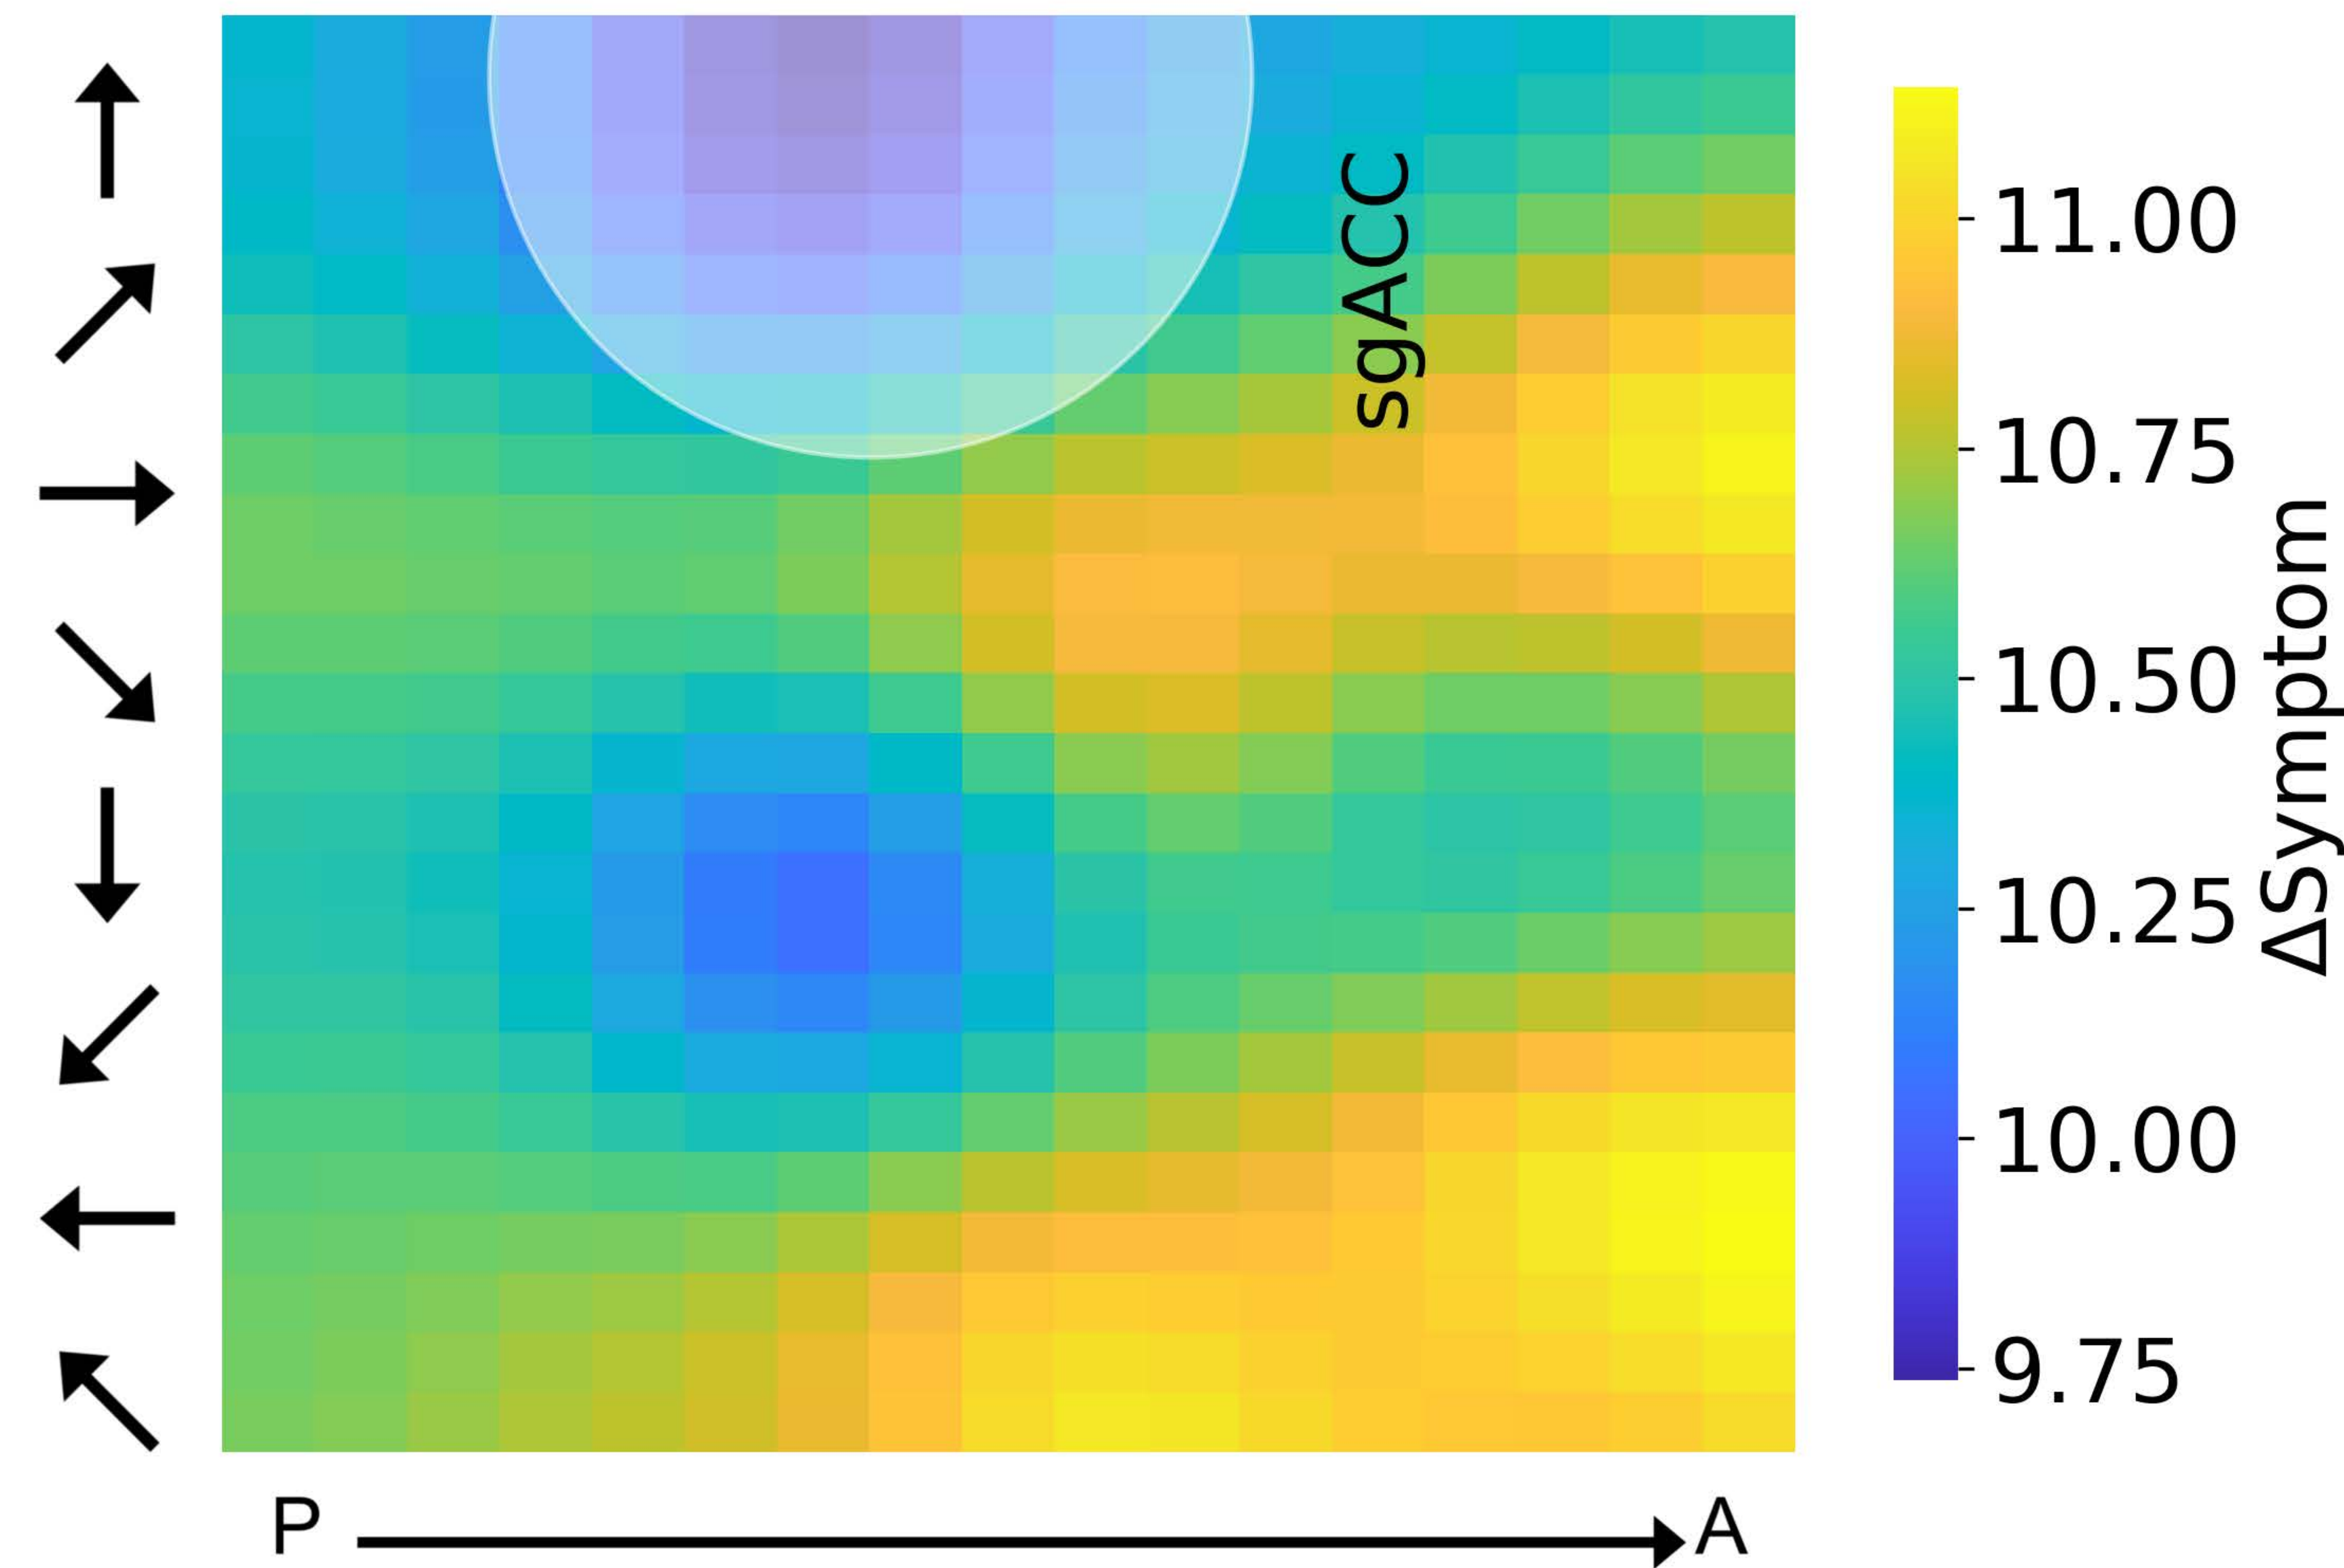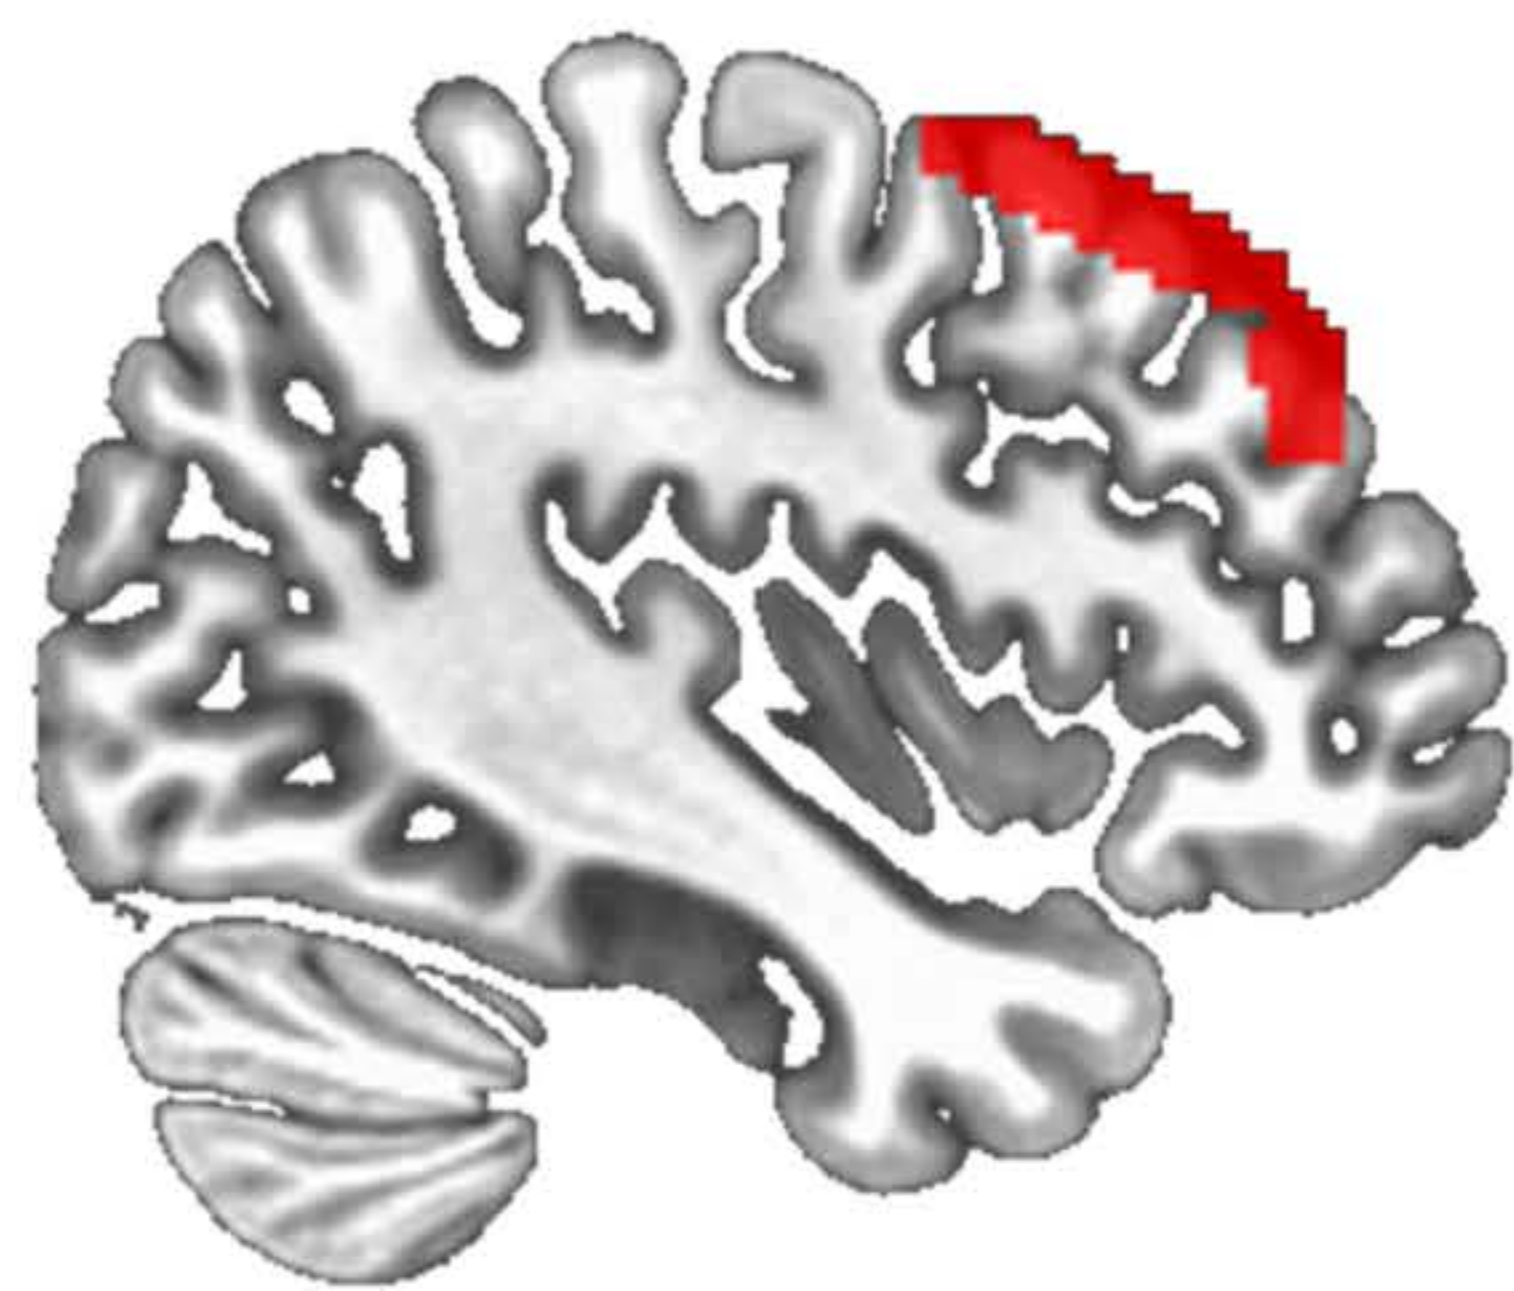



# NDARPA762UGZ\_madrs\_left\_dlpfc

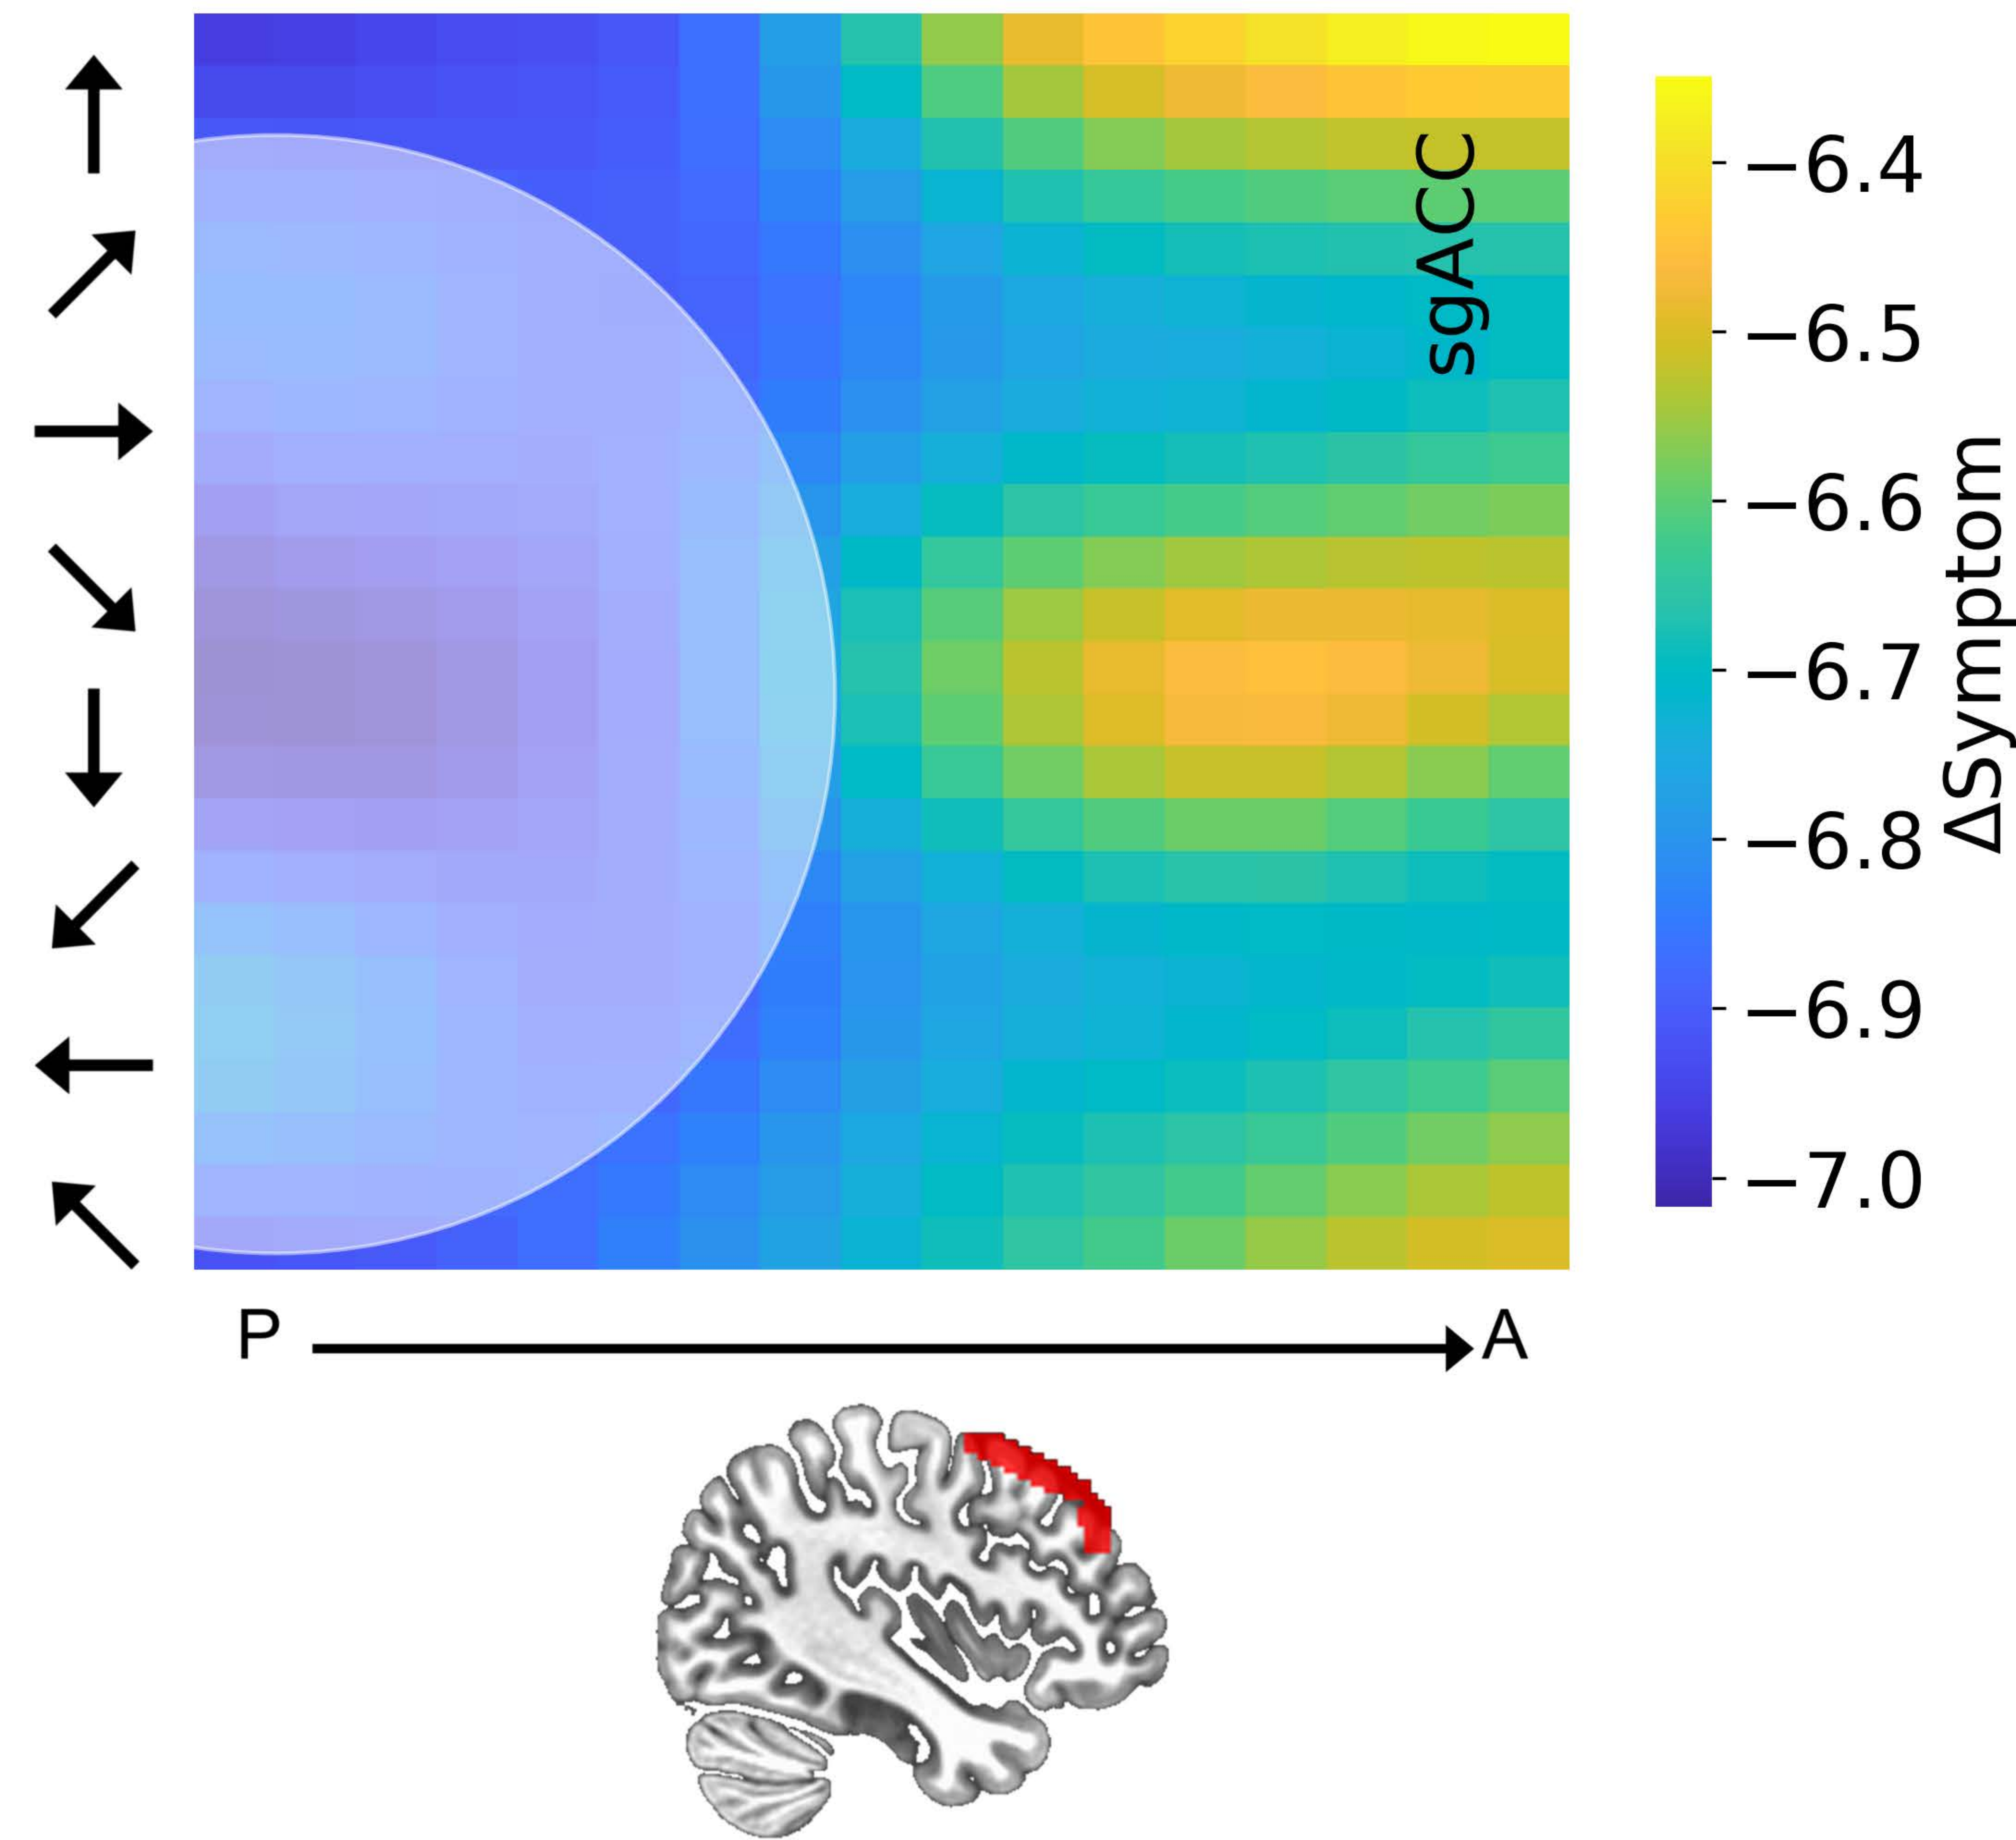



# NDARPC197VR3\_madrs\_left\_dlpfc

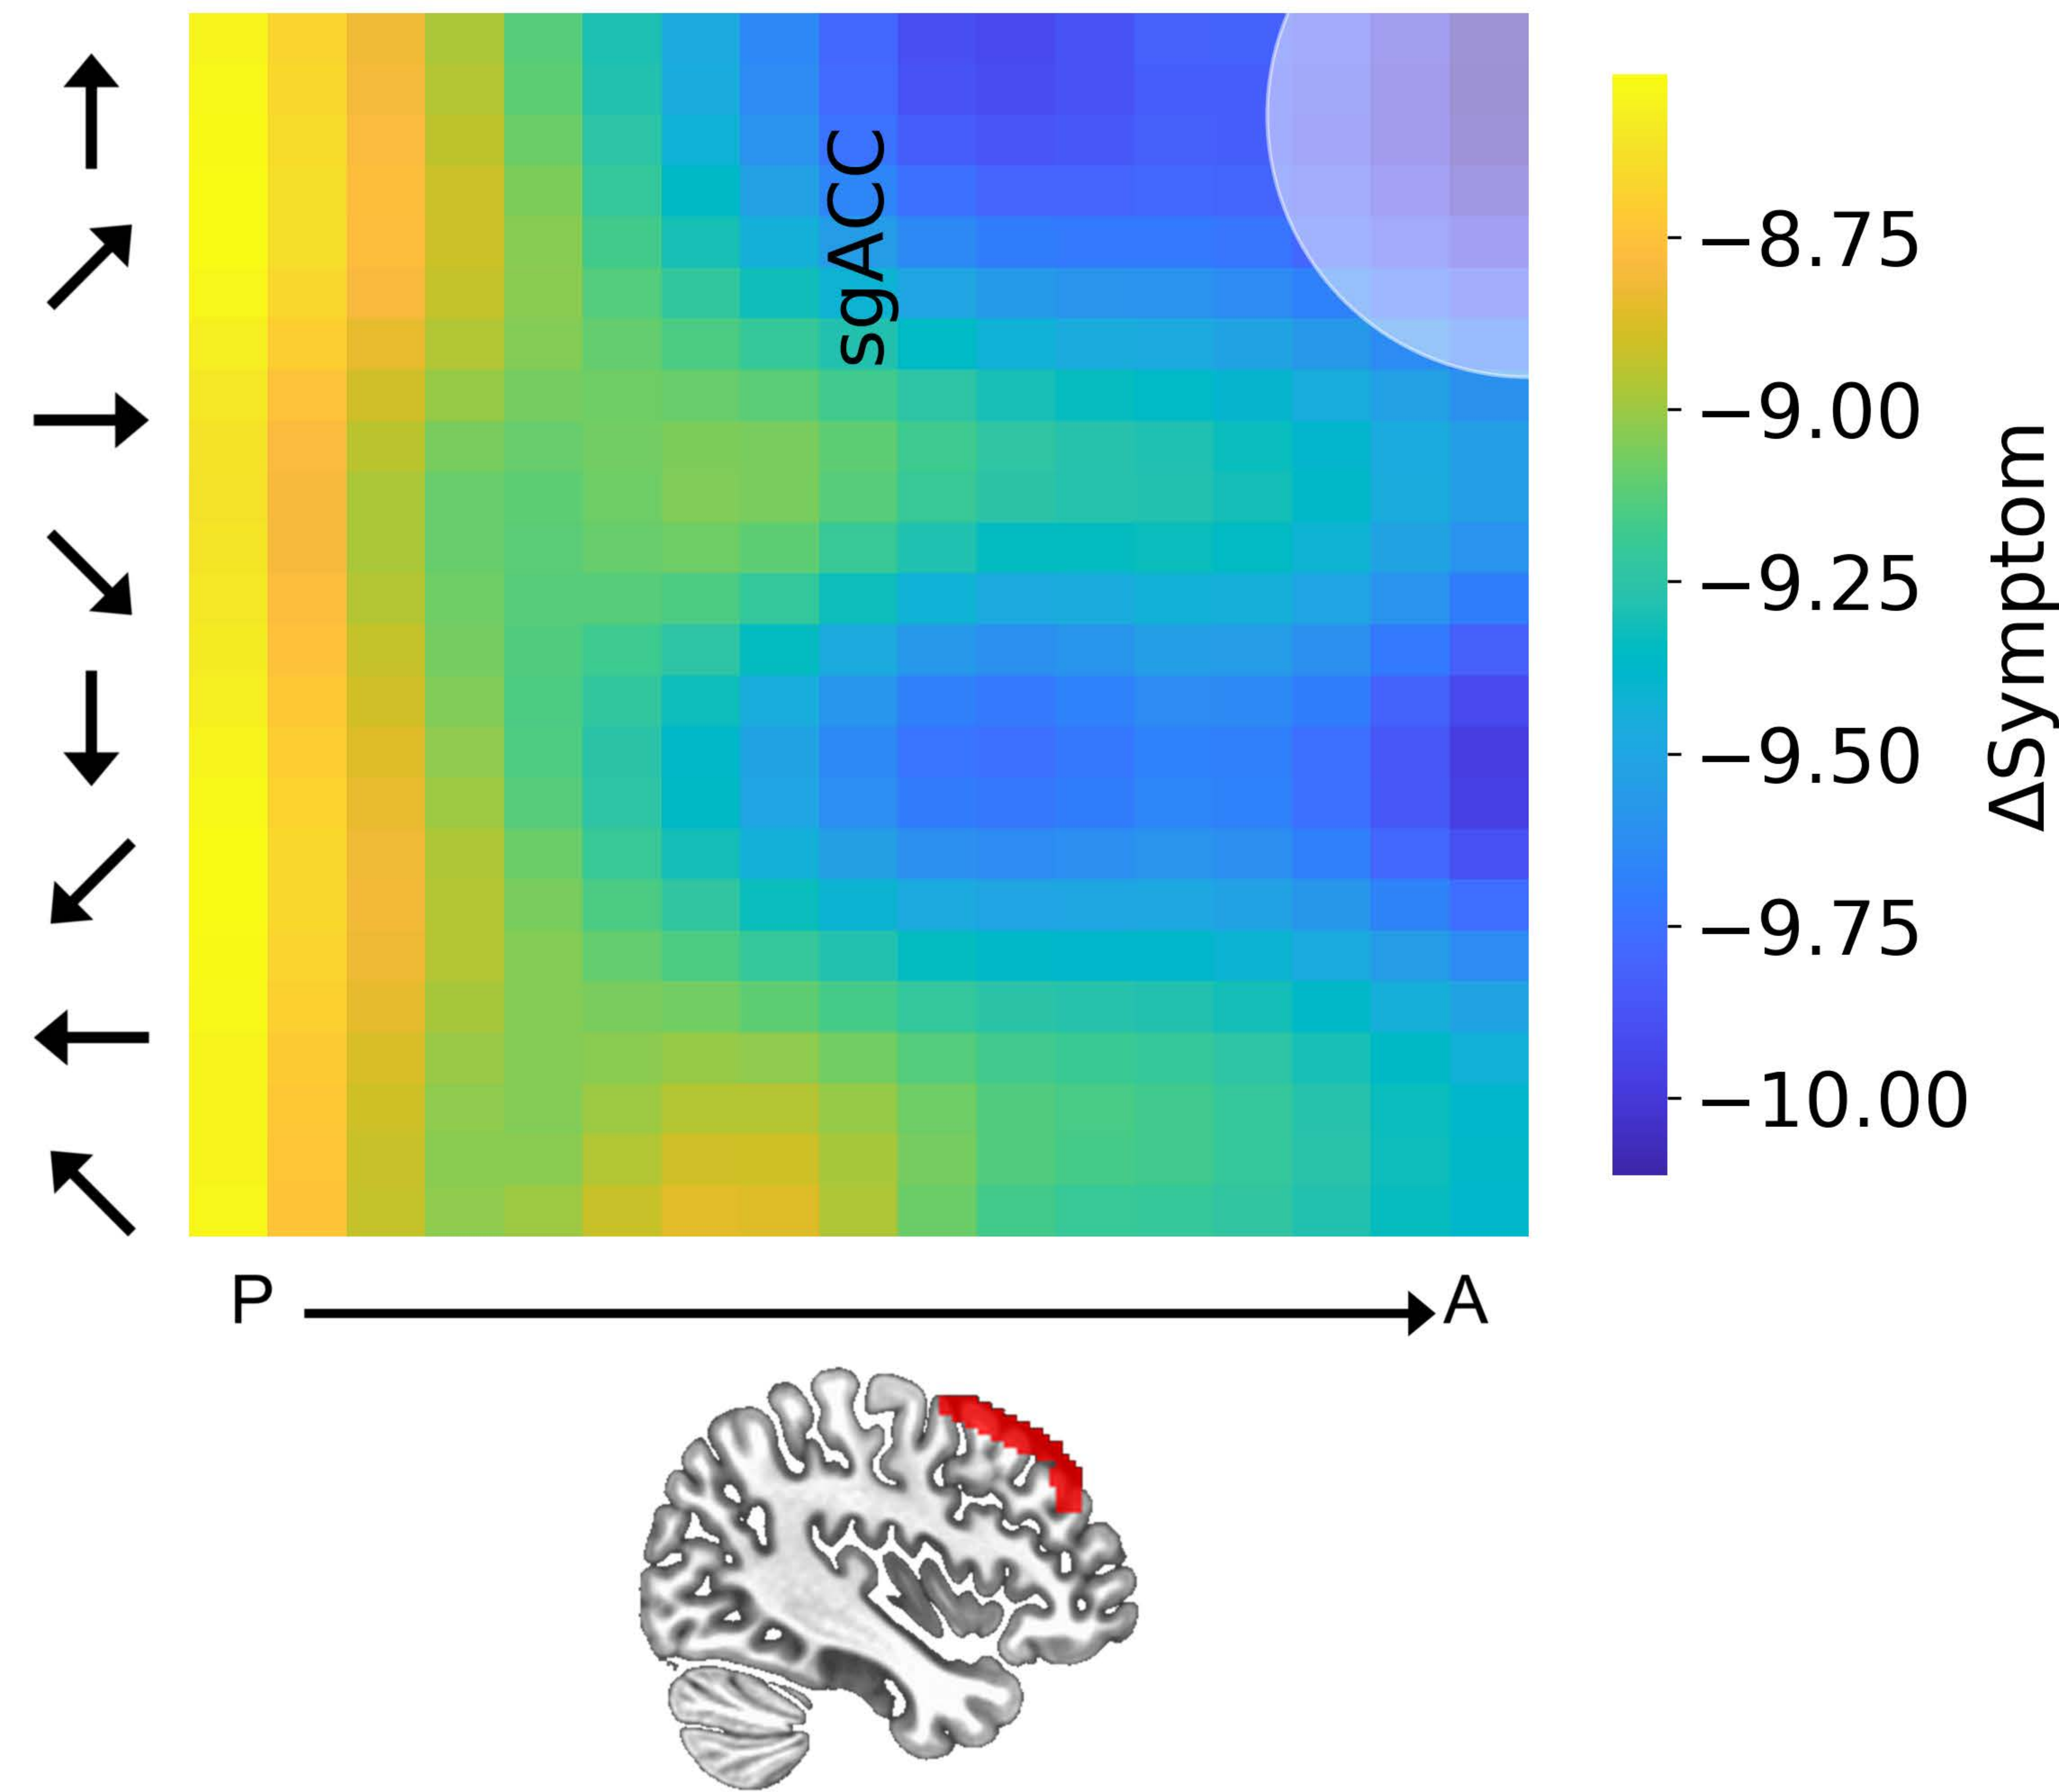



# NDARPF499HVH\_madrs\_left\_dlpfc

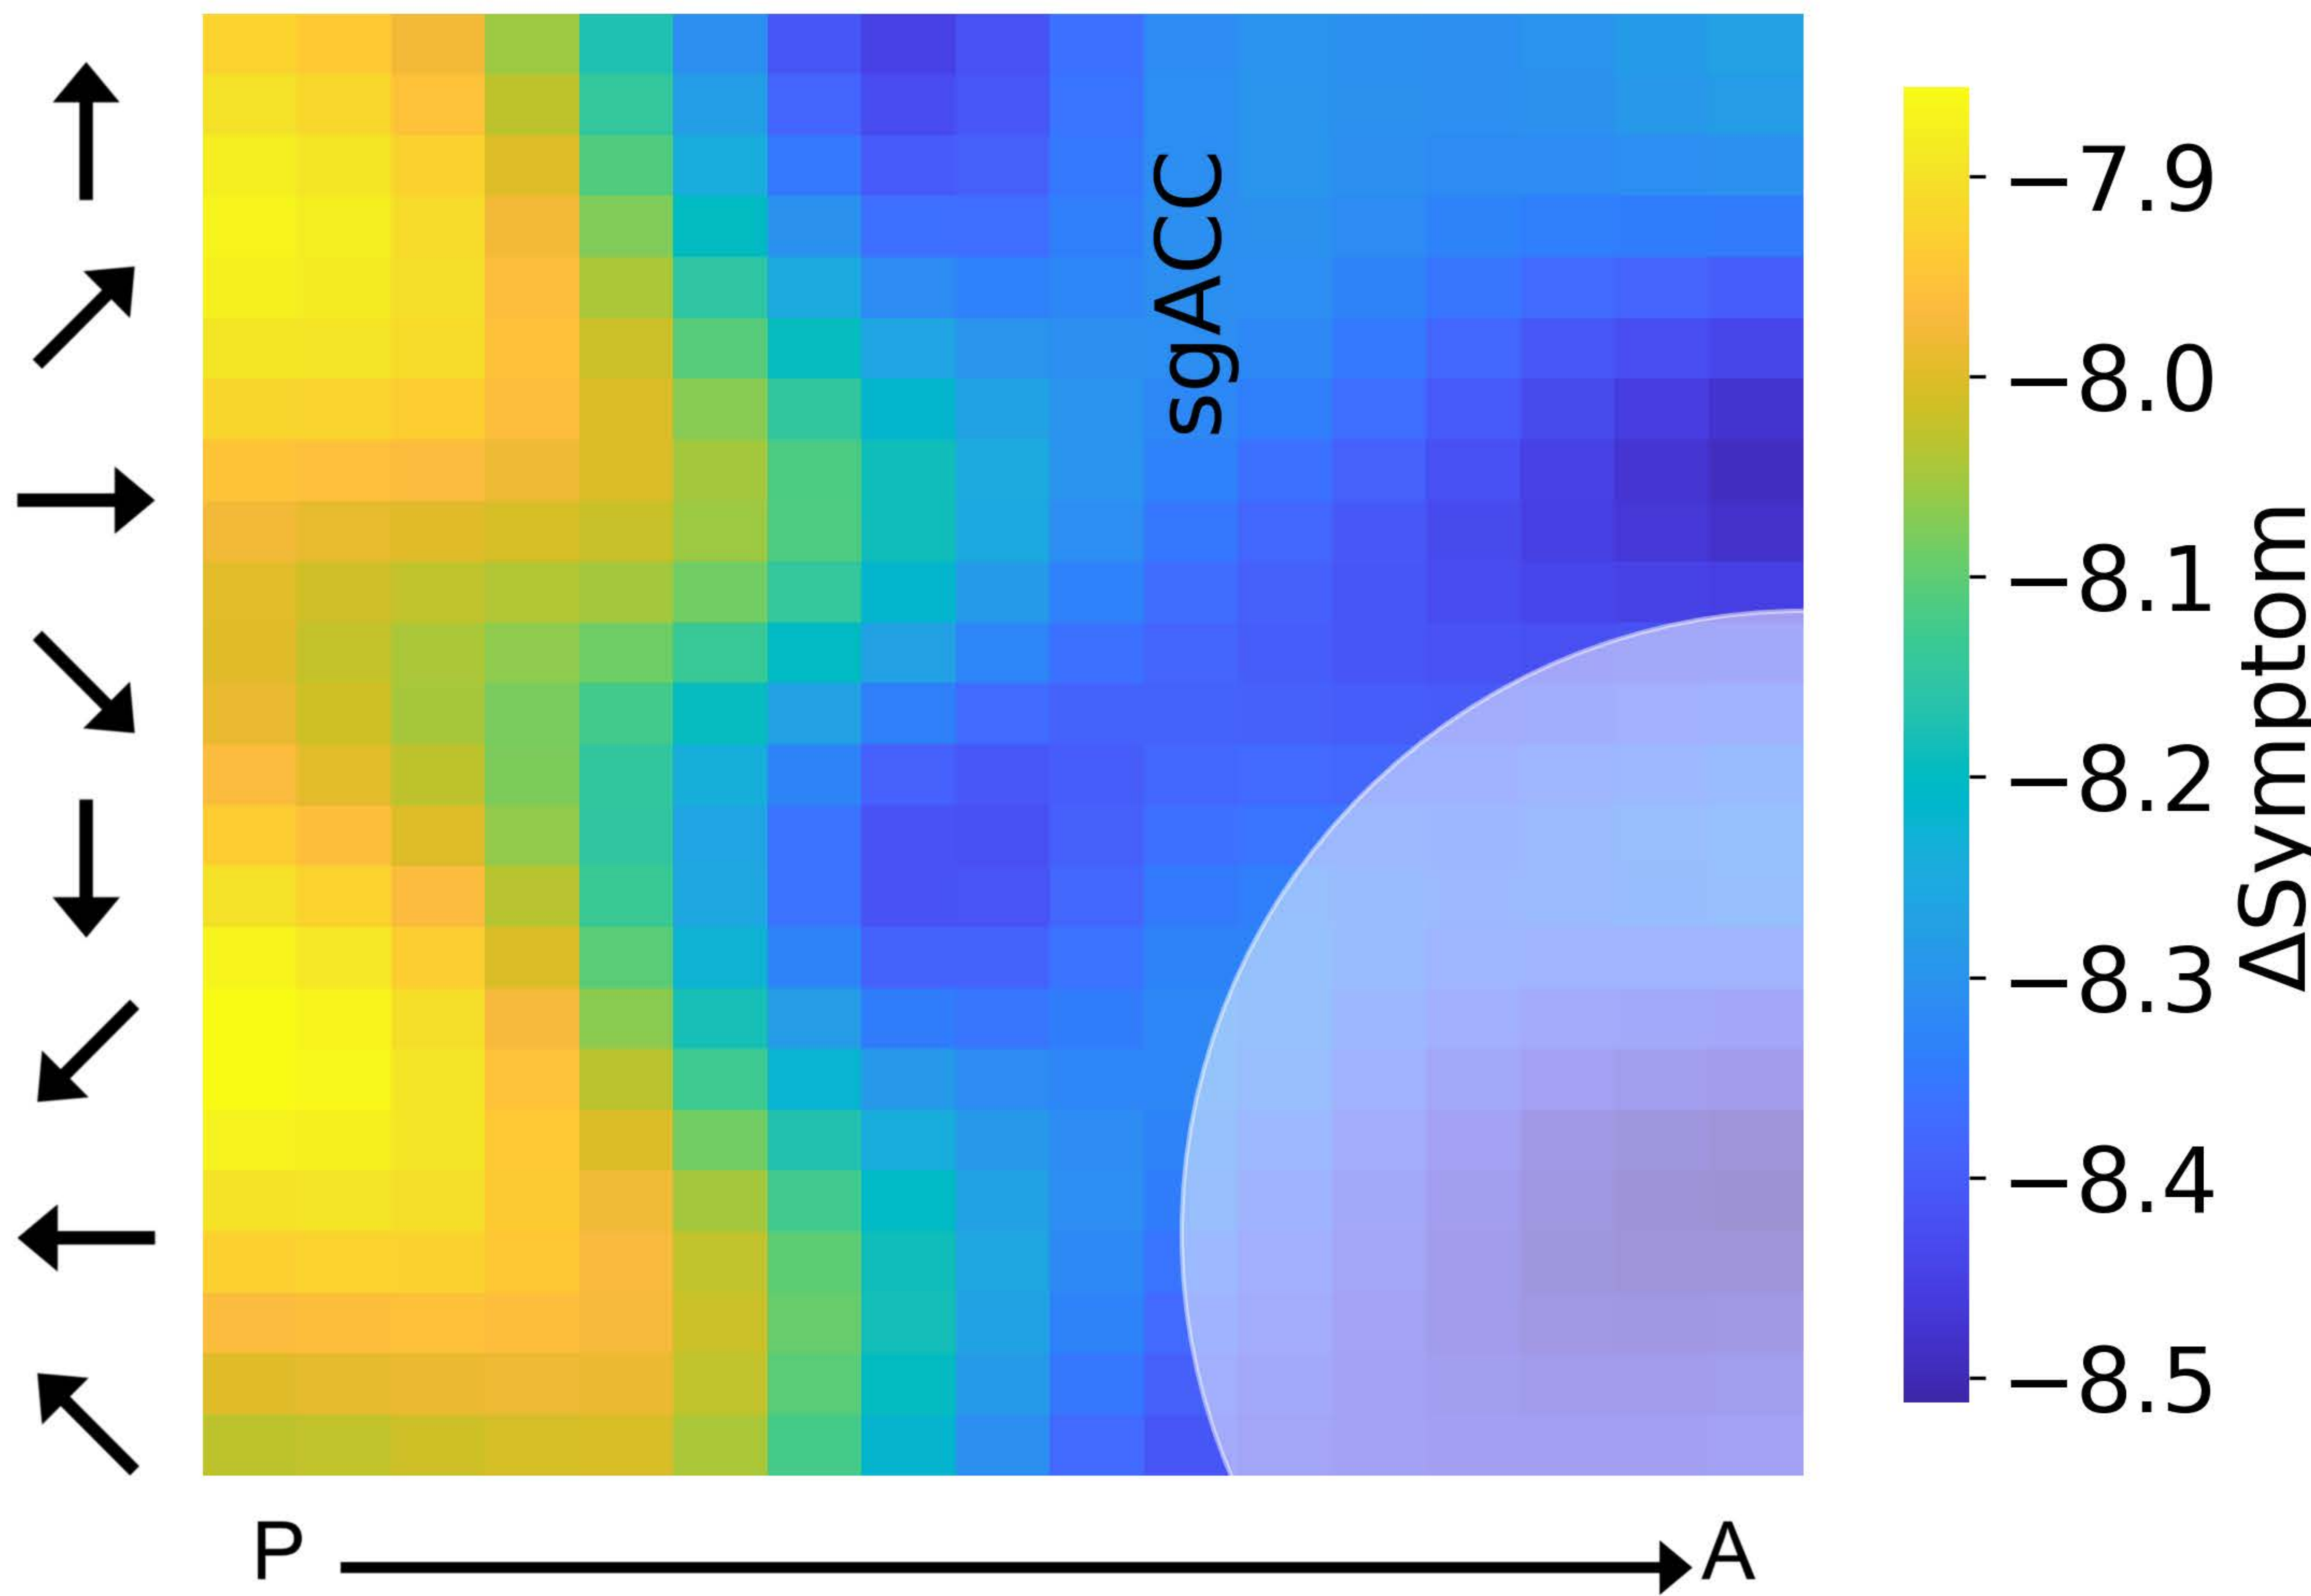



# INDARPK811MVW\_madrs\_left\_dlpfc

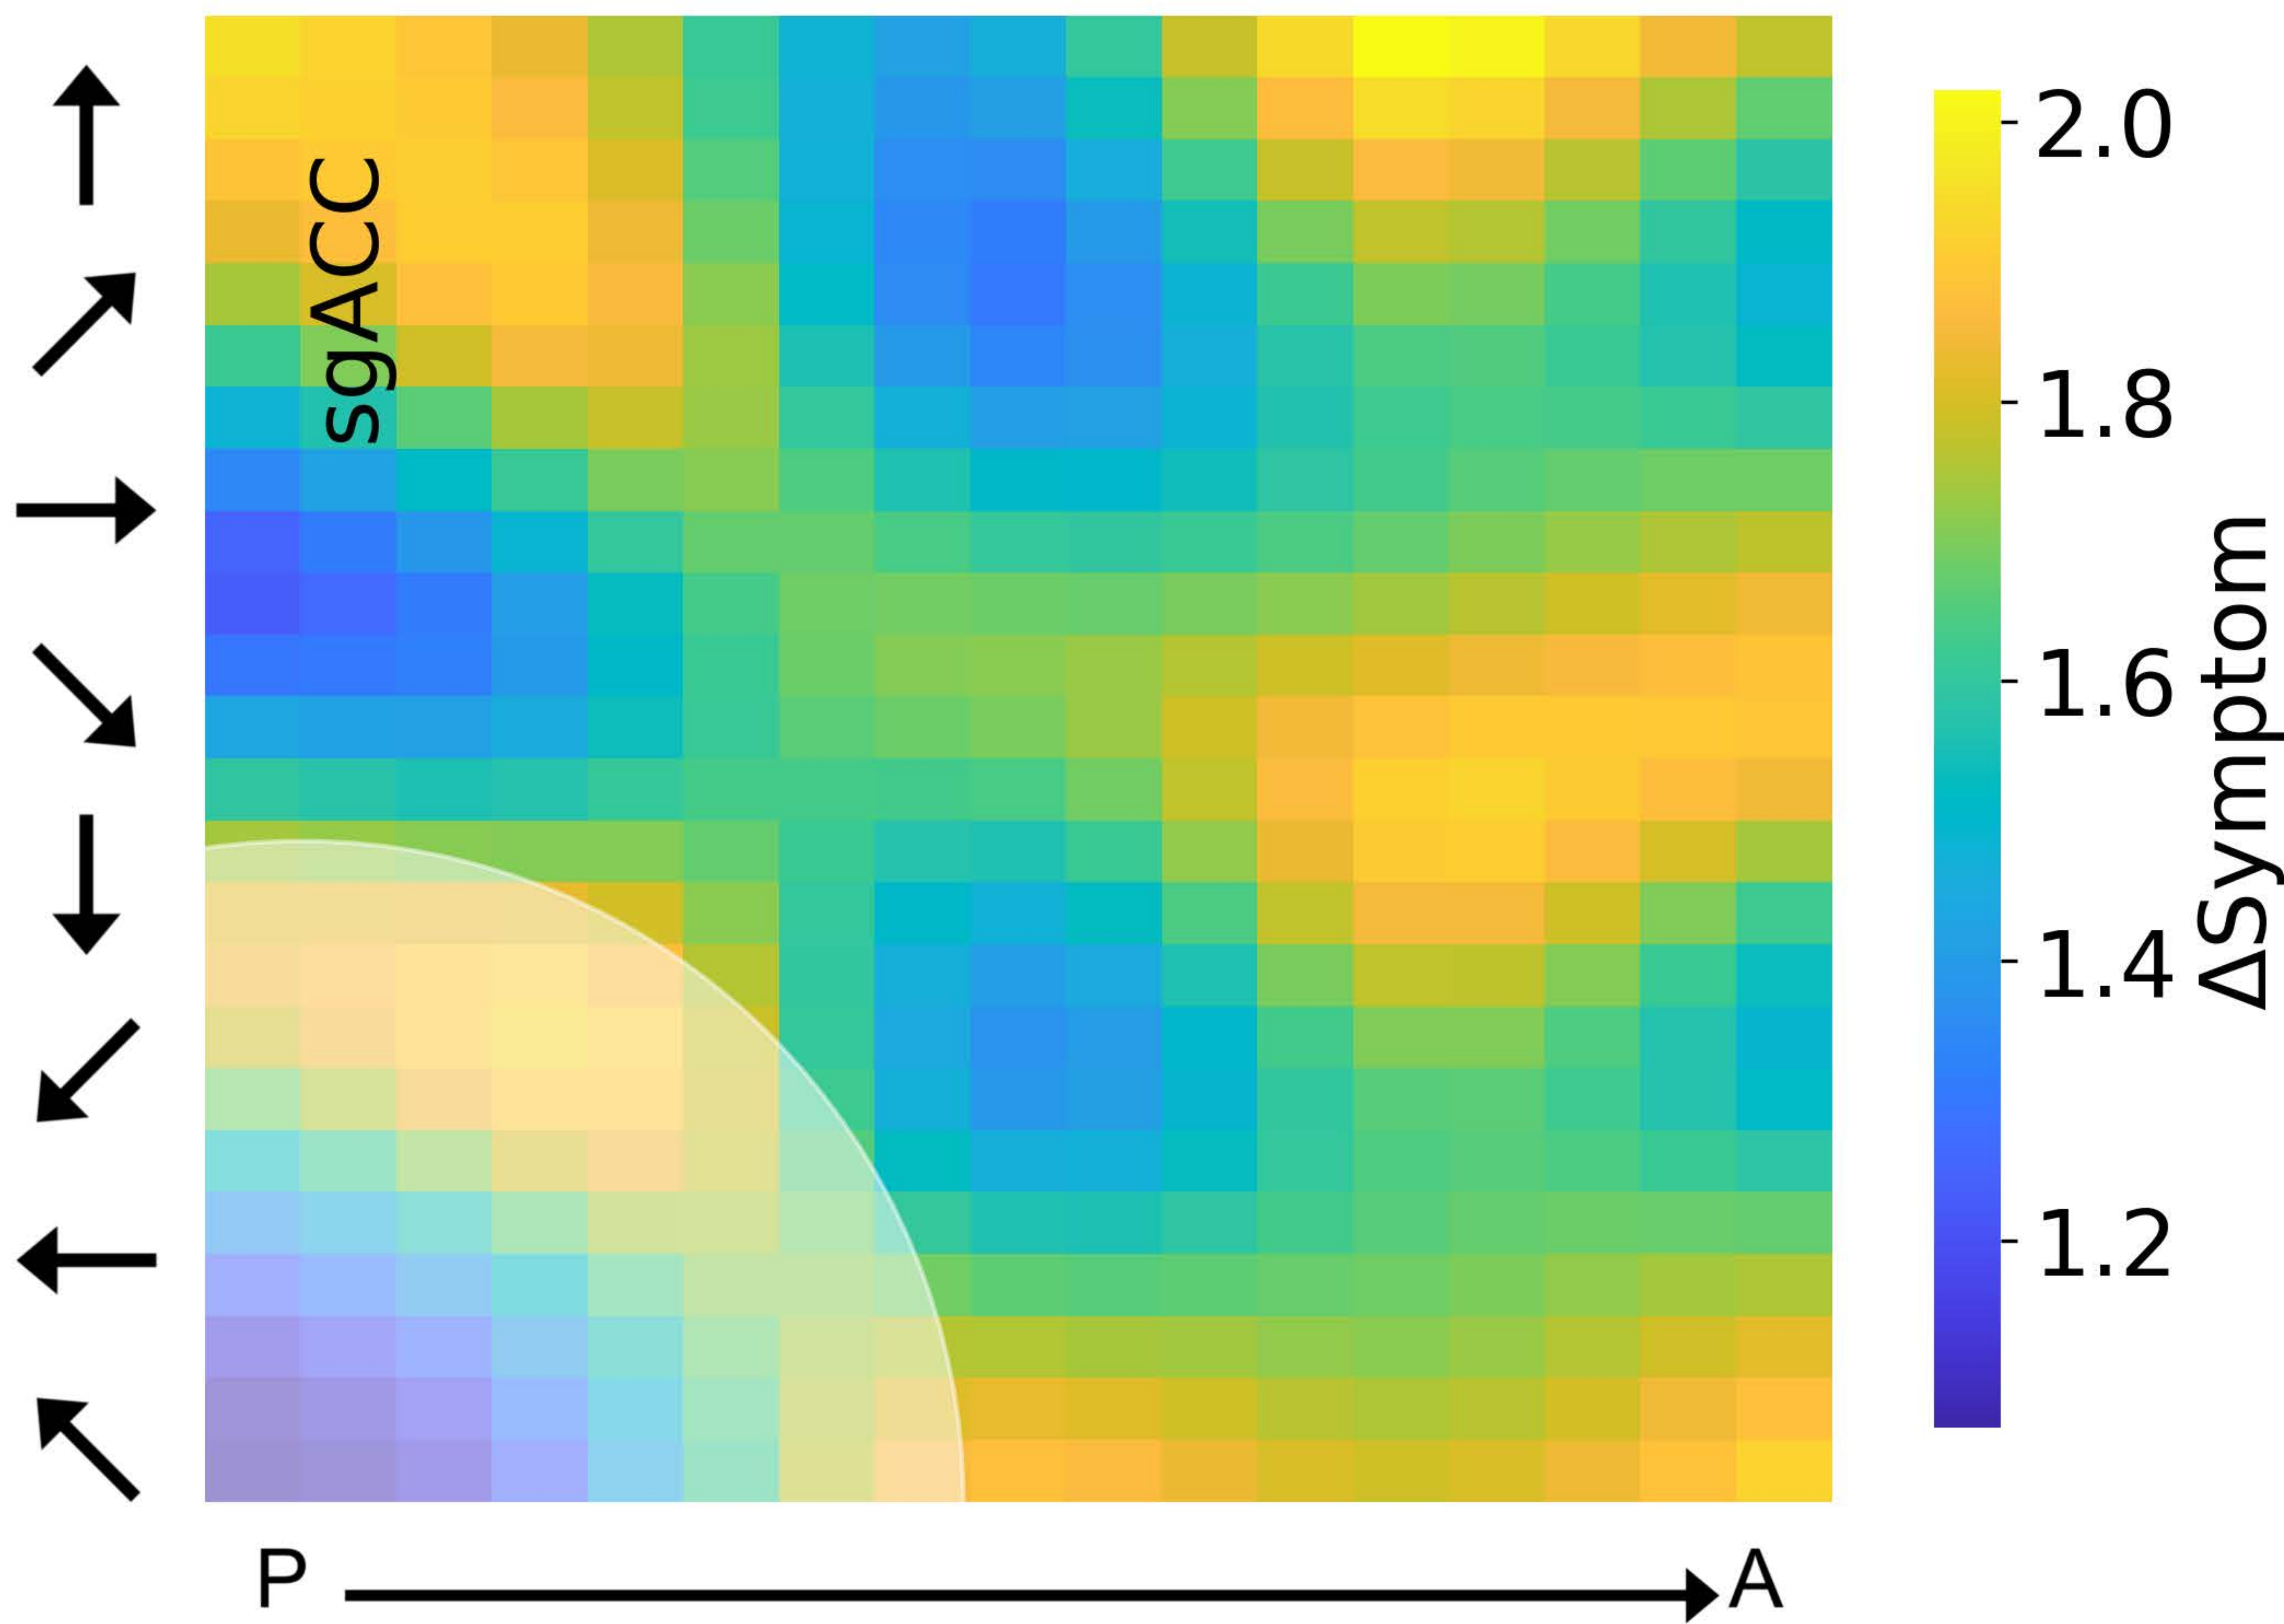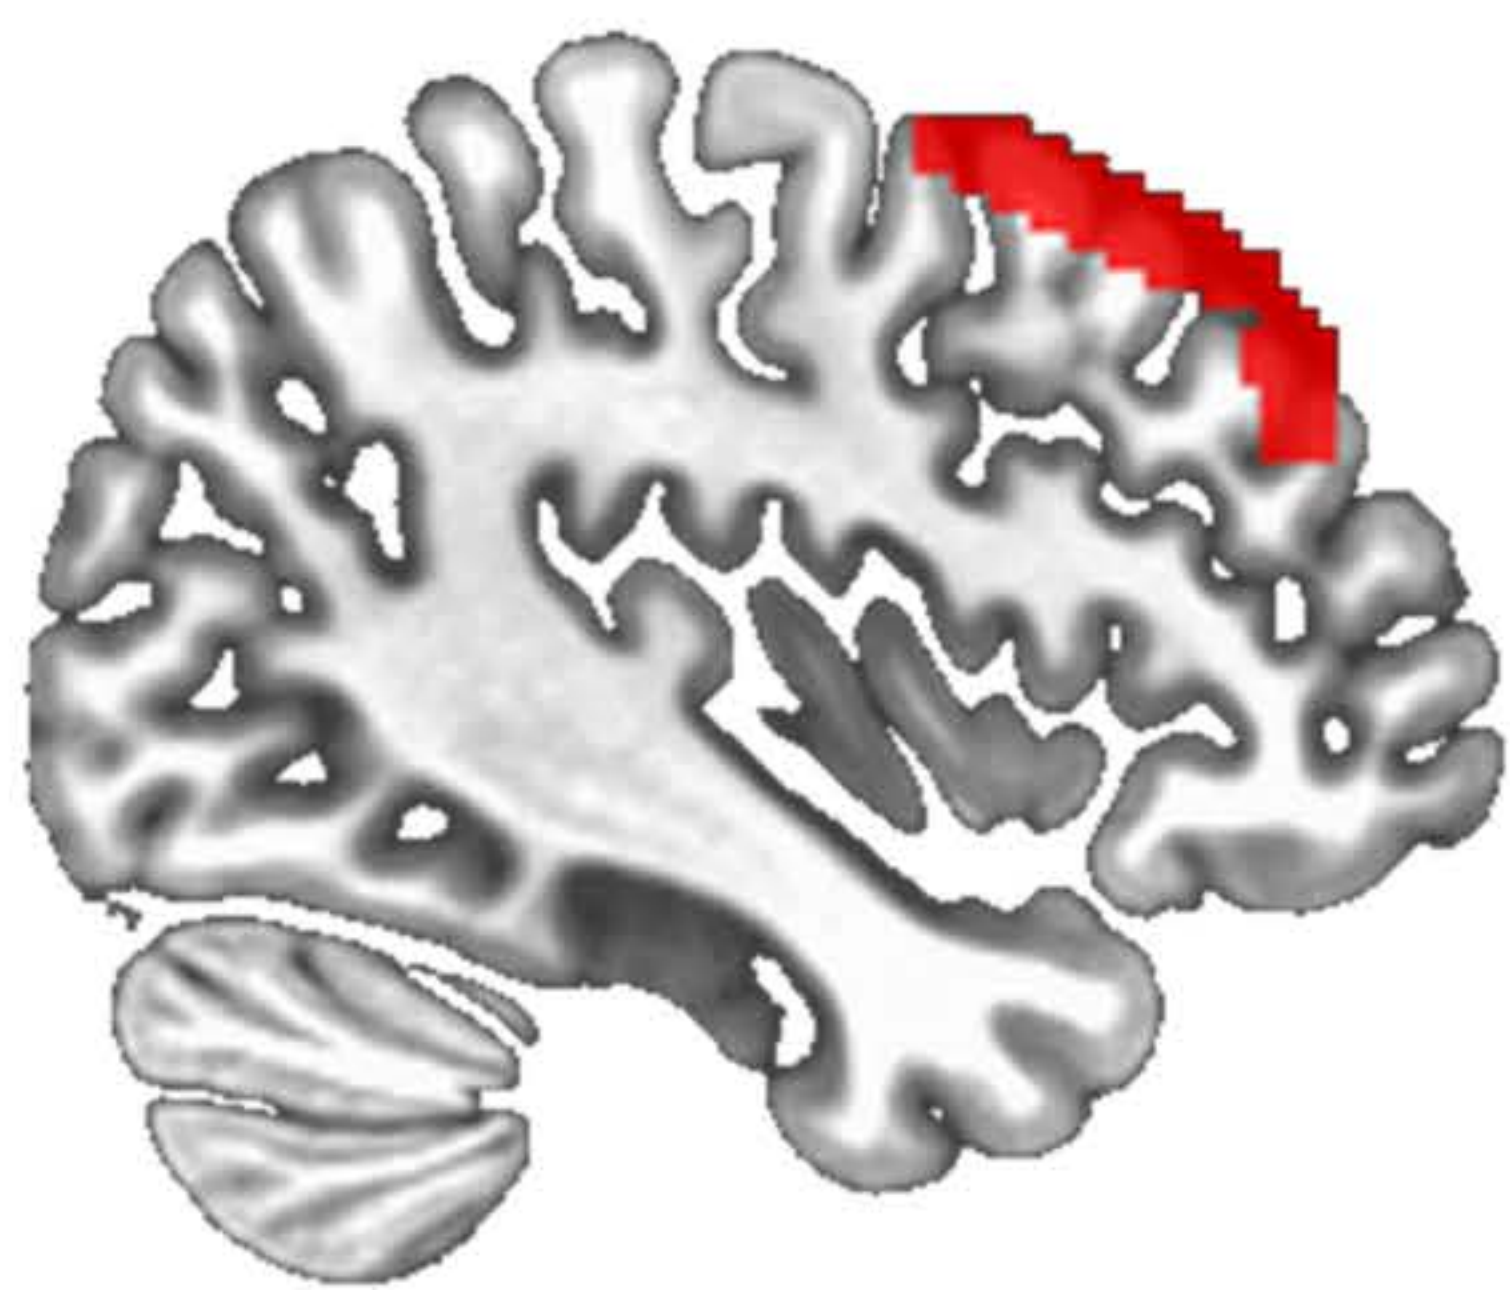



# NDARPT040EGR\_madrs\_left\_dlpfc

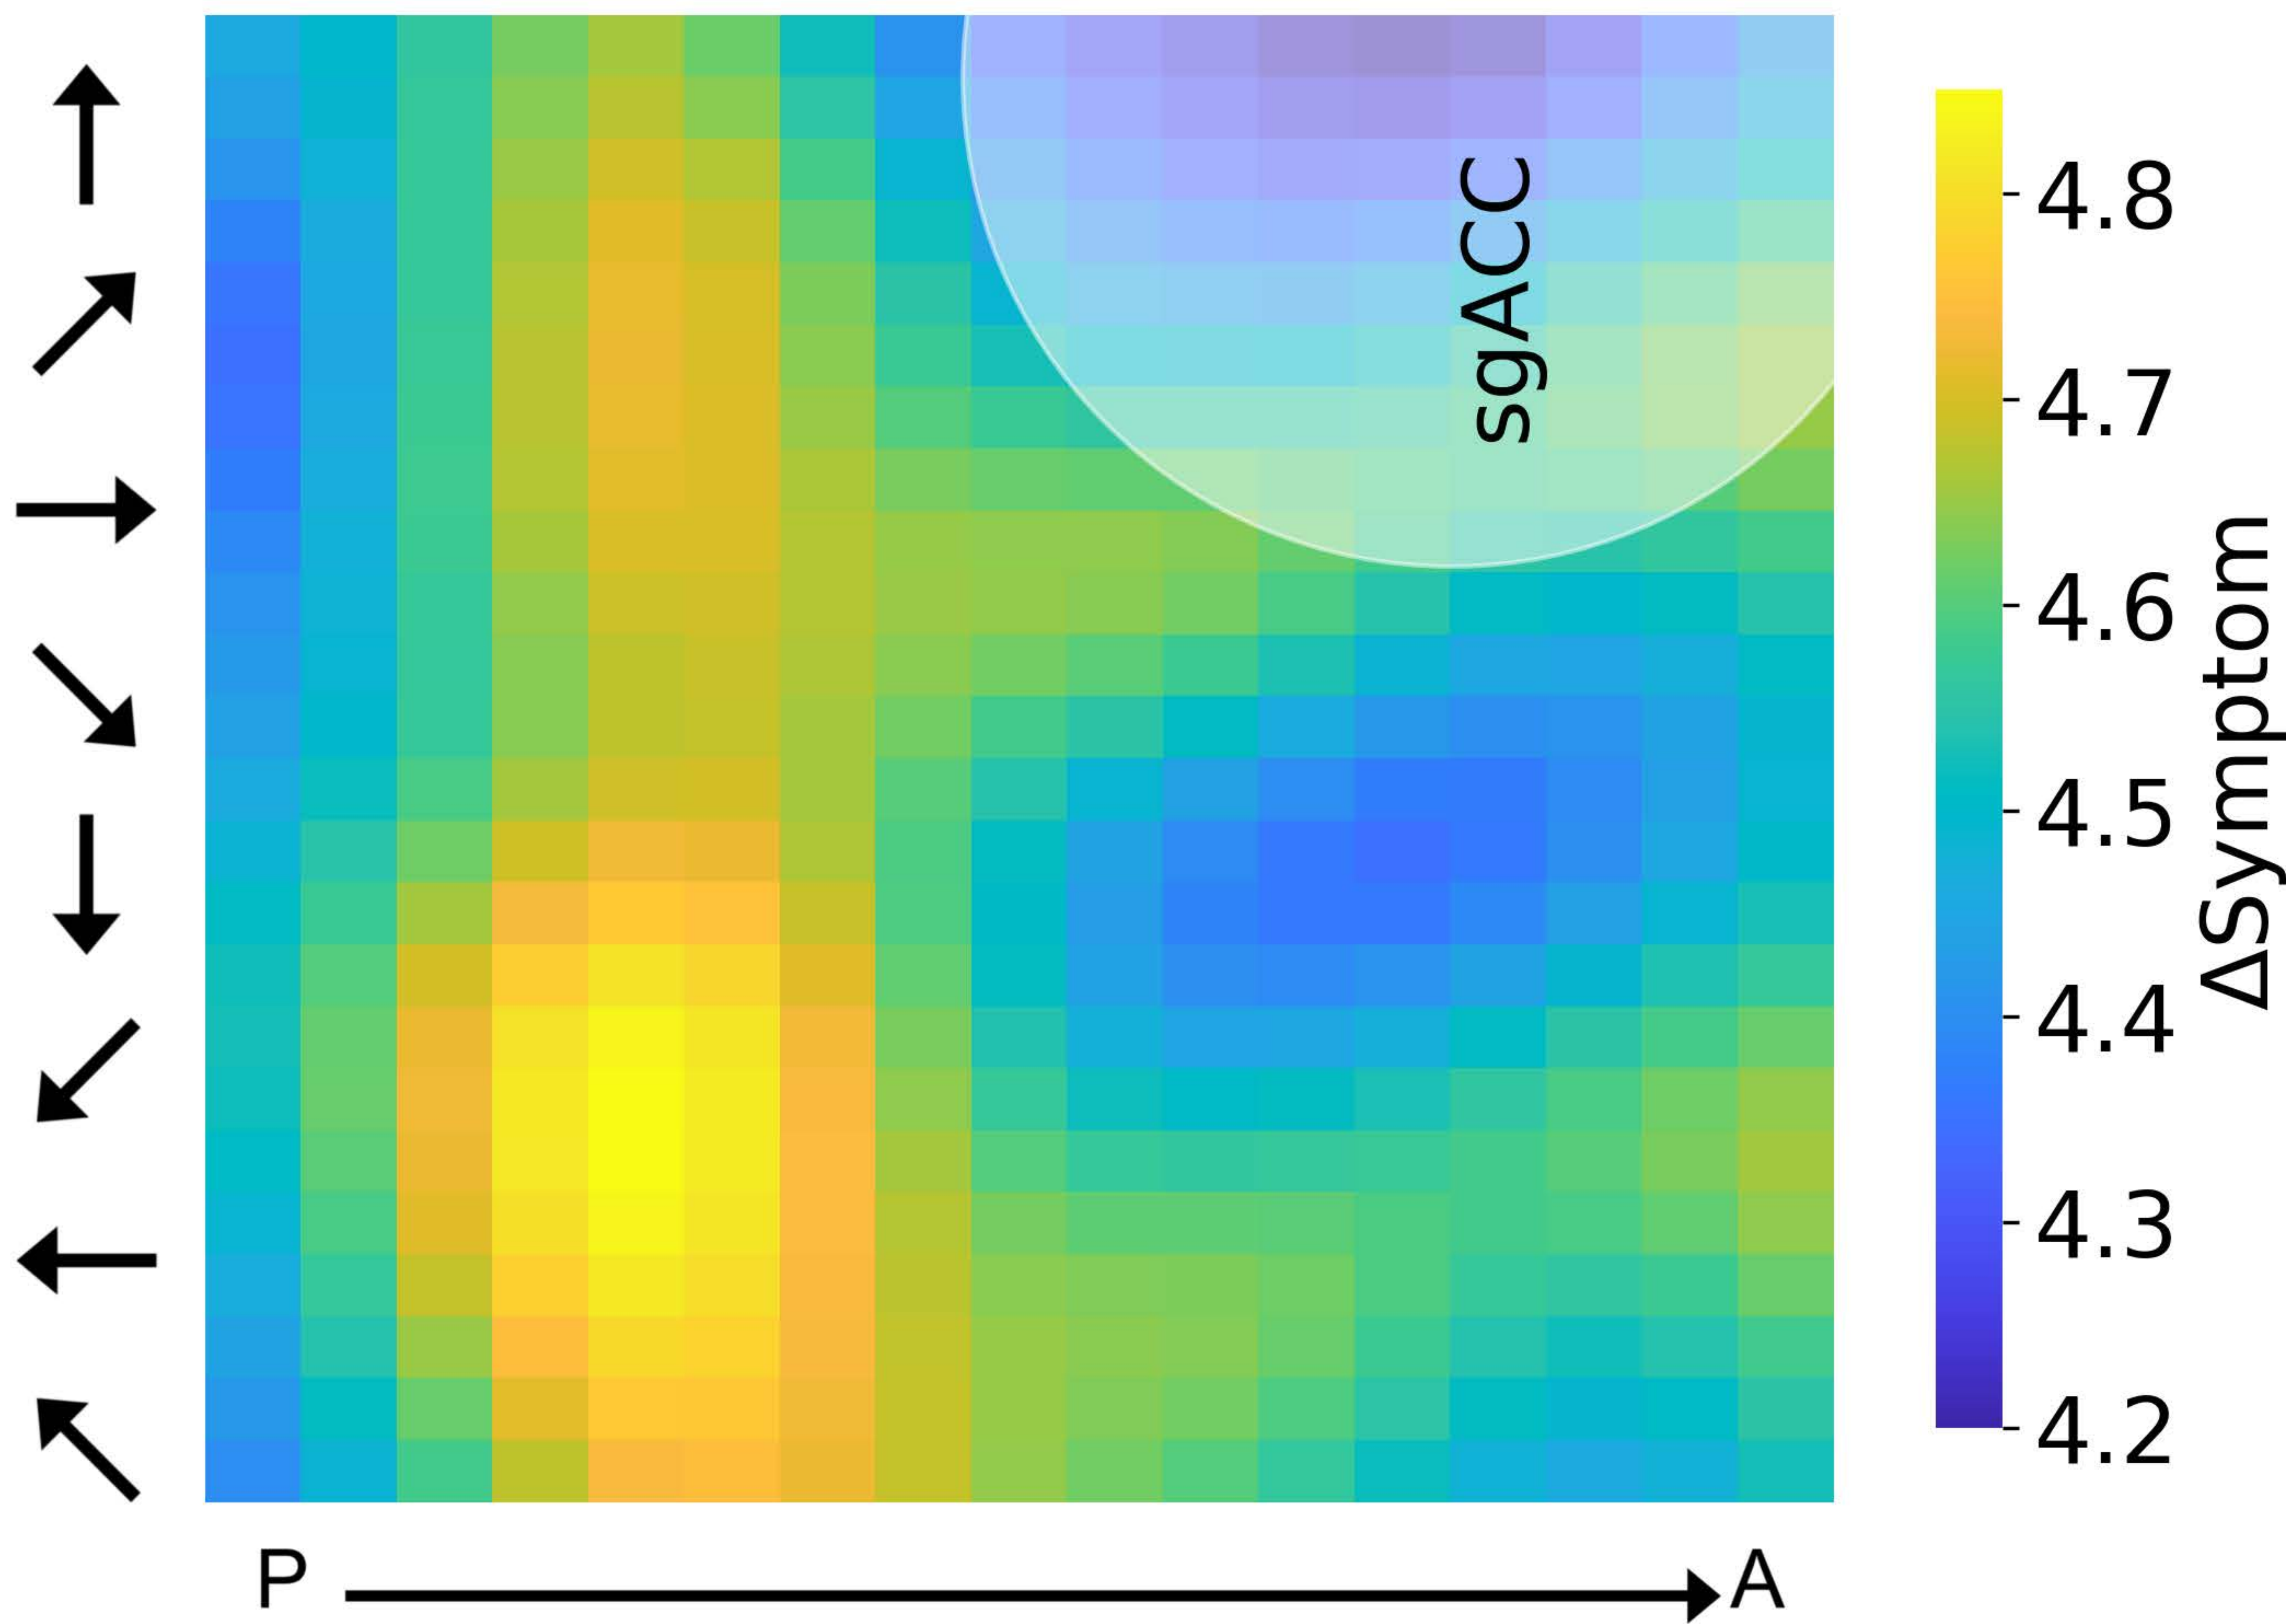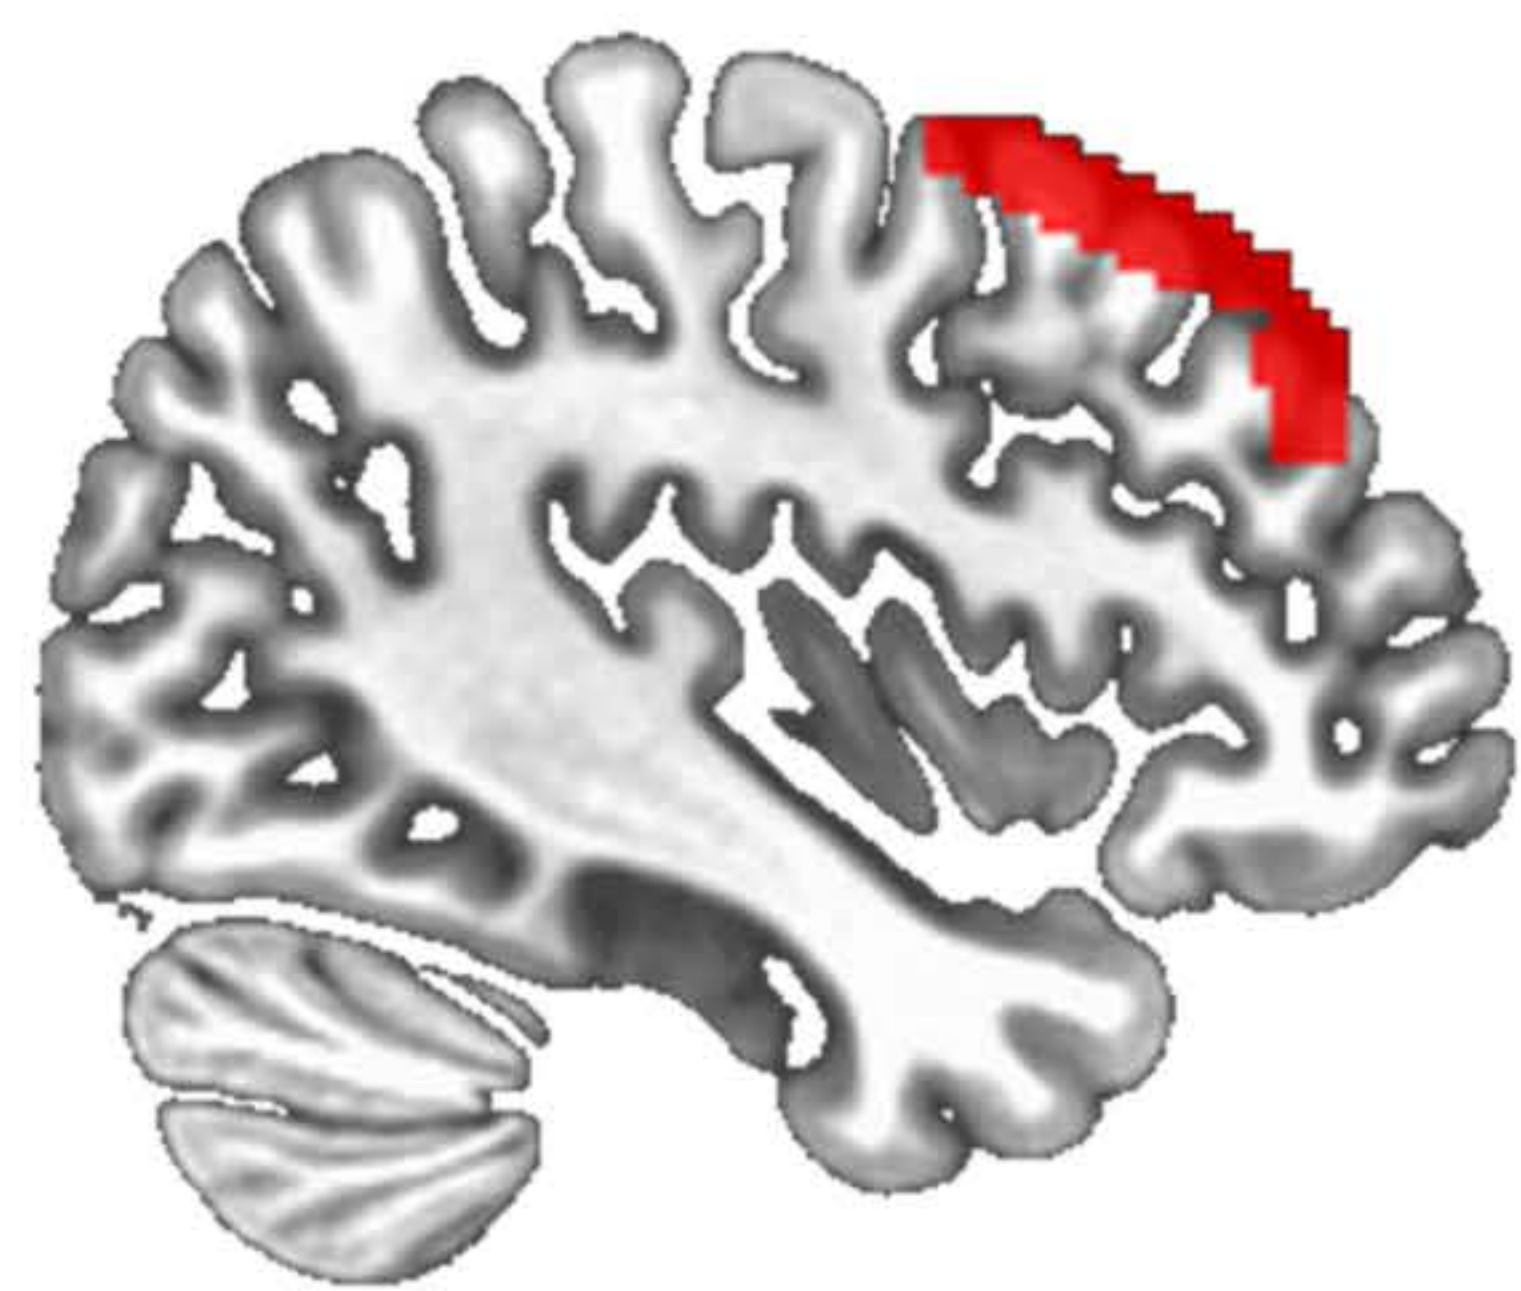



# NDARPW706YNA\_madrs\_left\_dlpfc

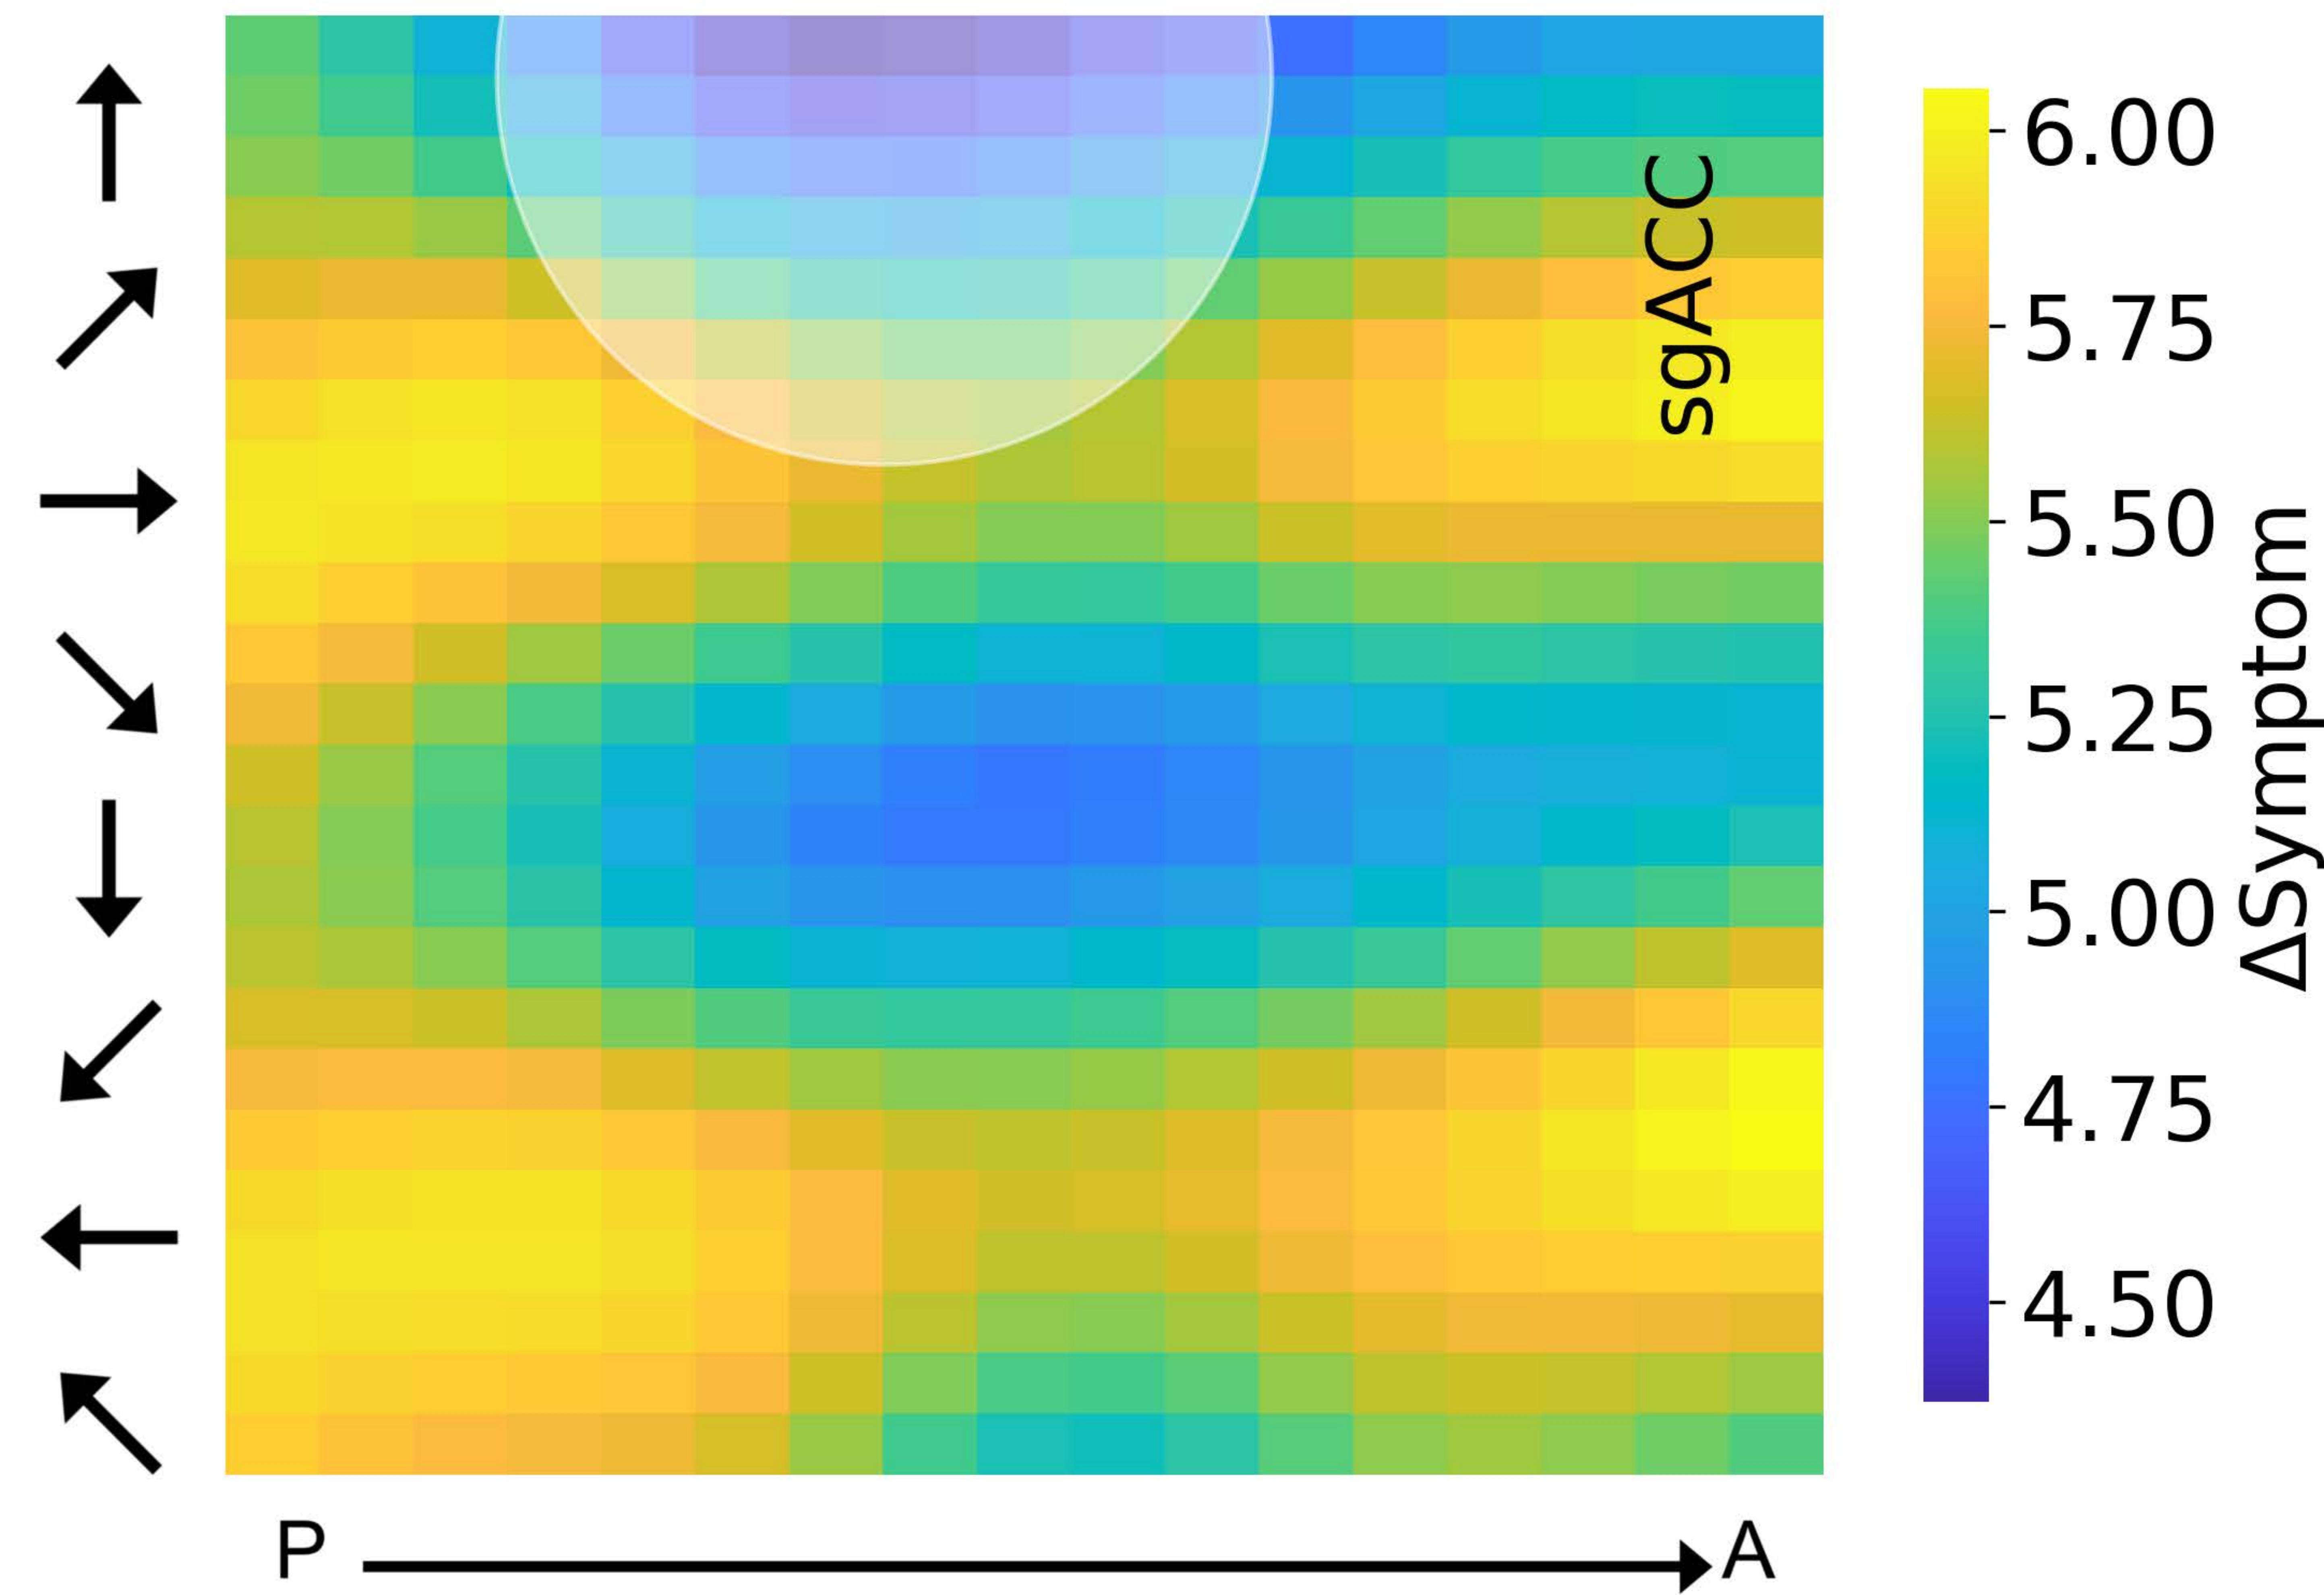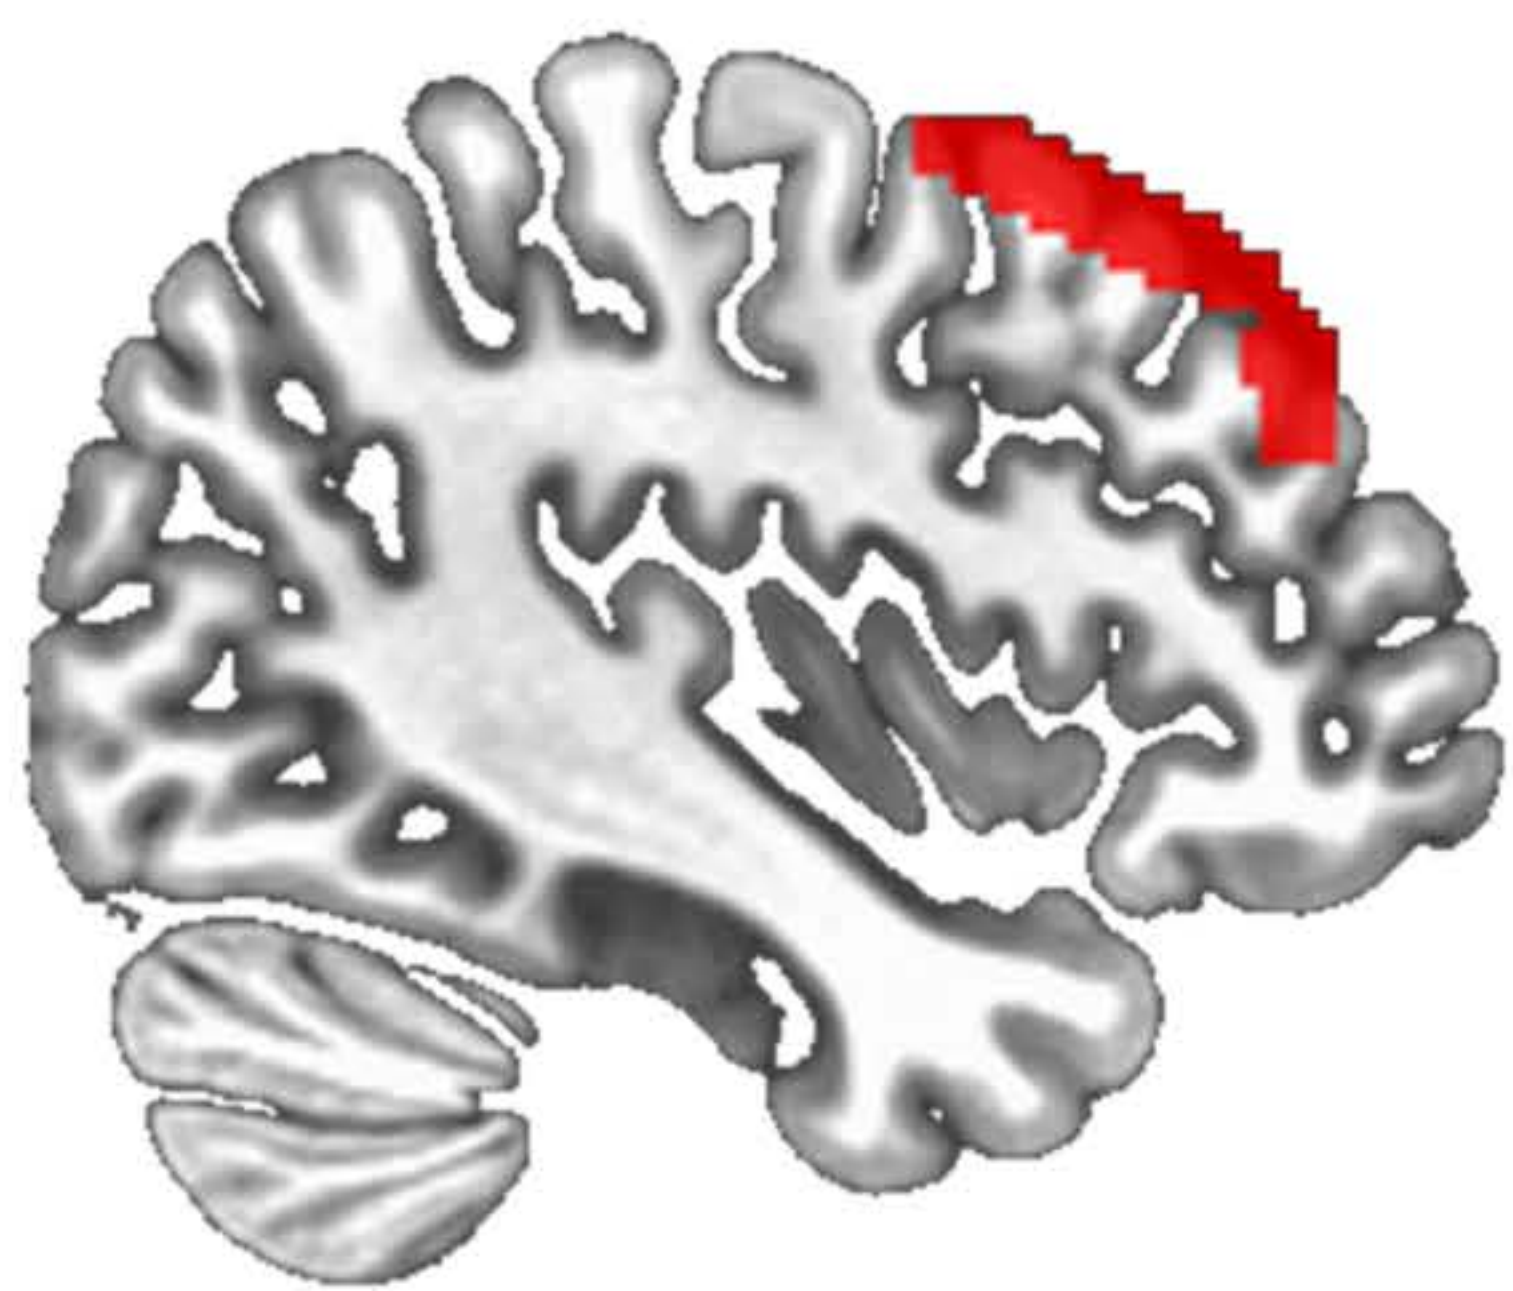



# NDARPZ537YY0\_madrs\_left\_dlpfc

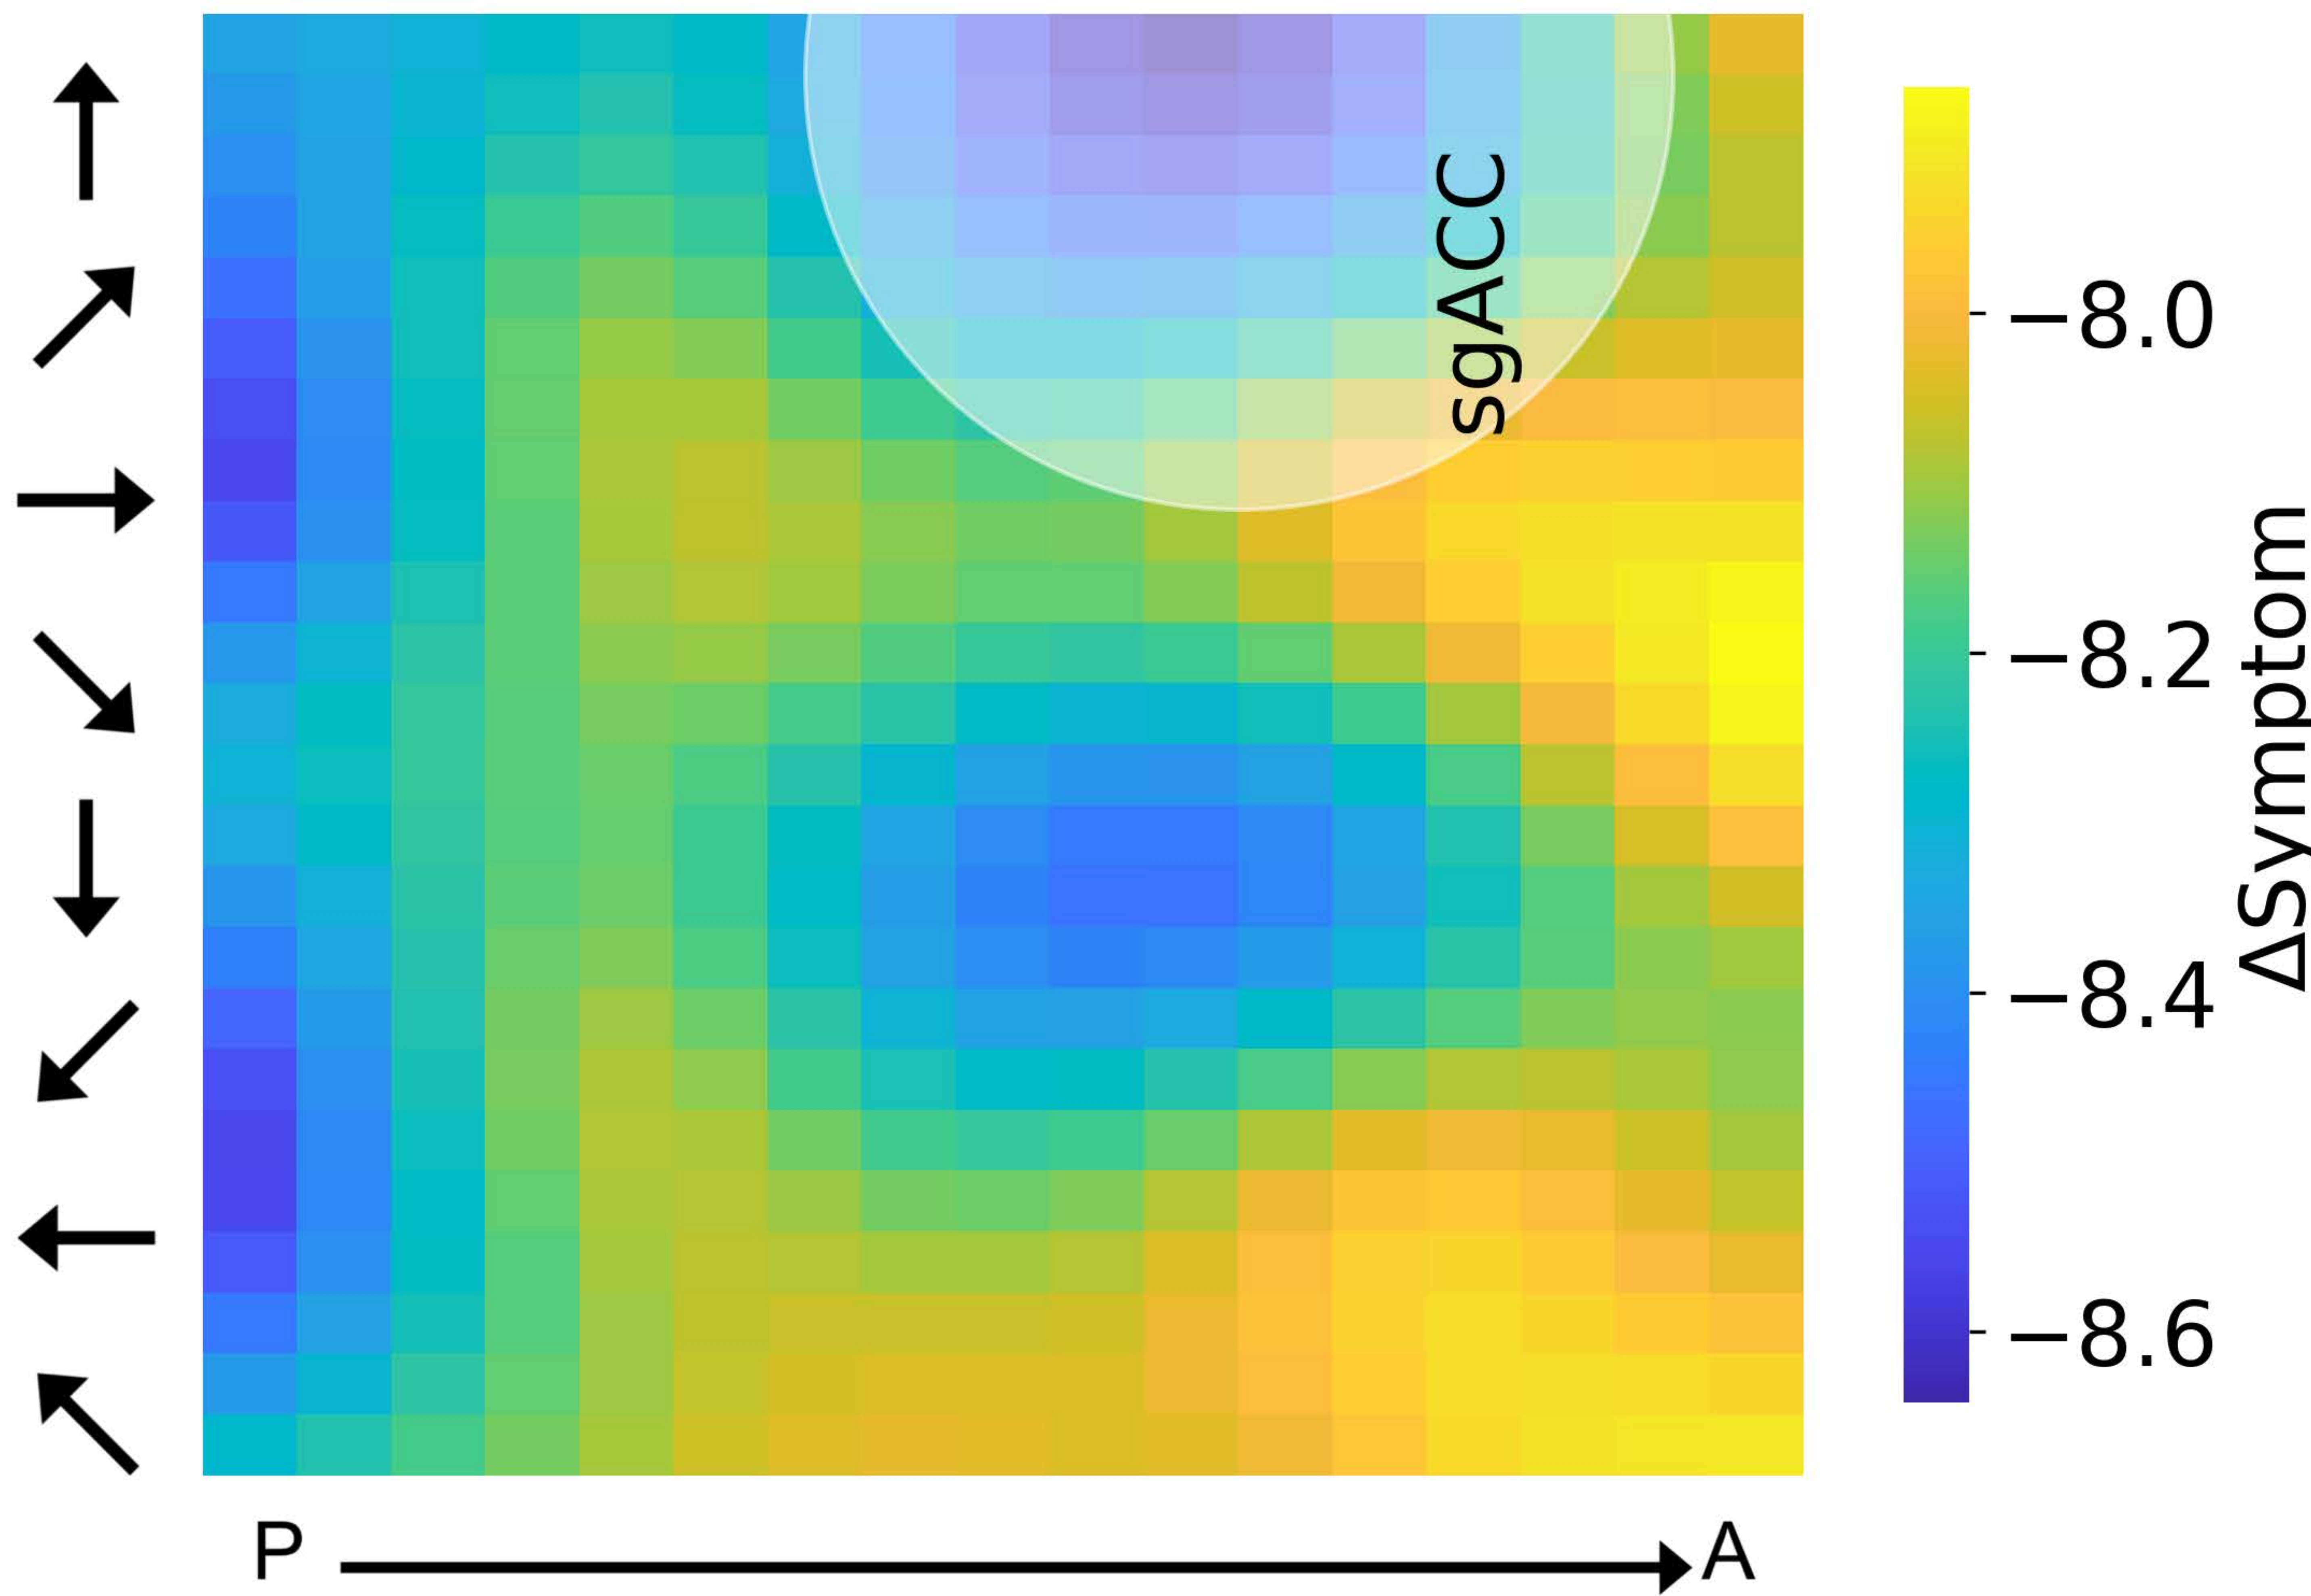



# NDARRRD55DDH\_madr\_left\_dlpfc

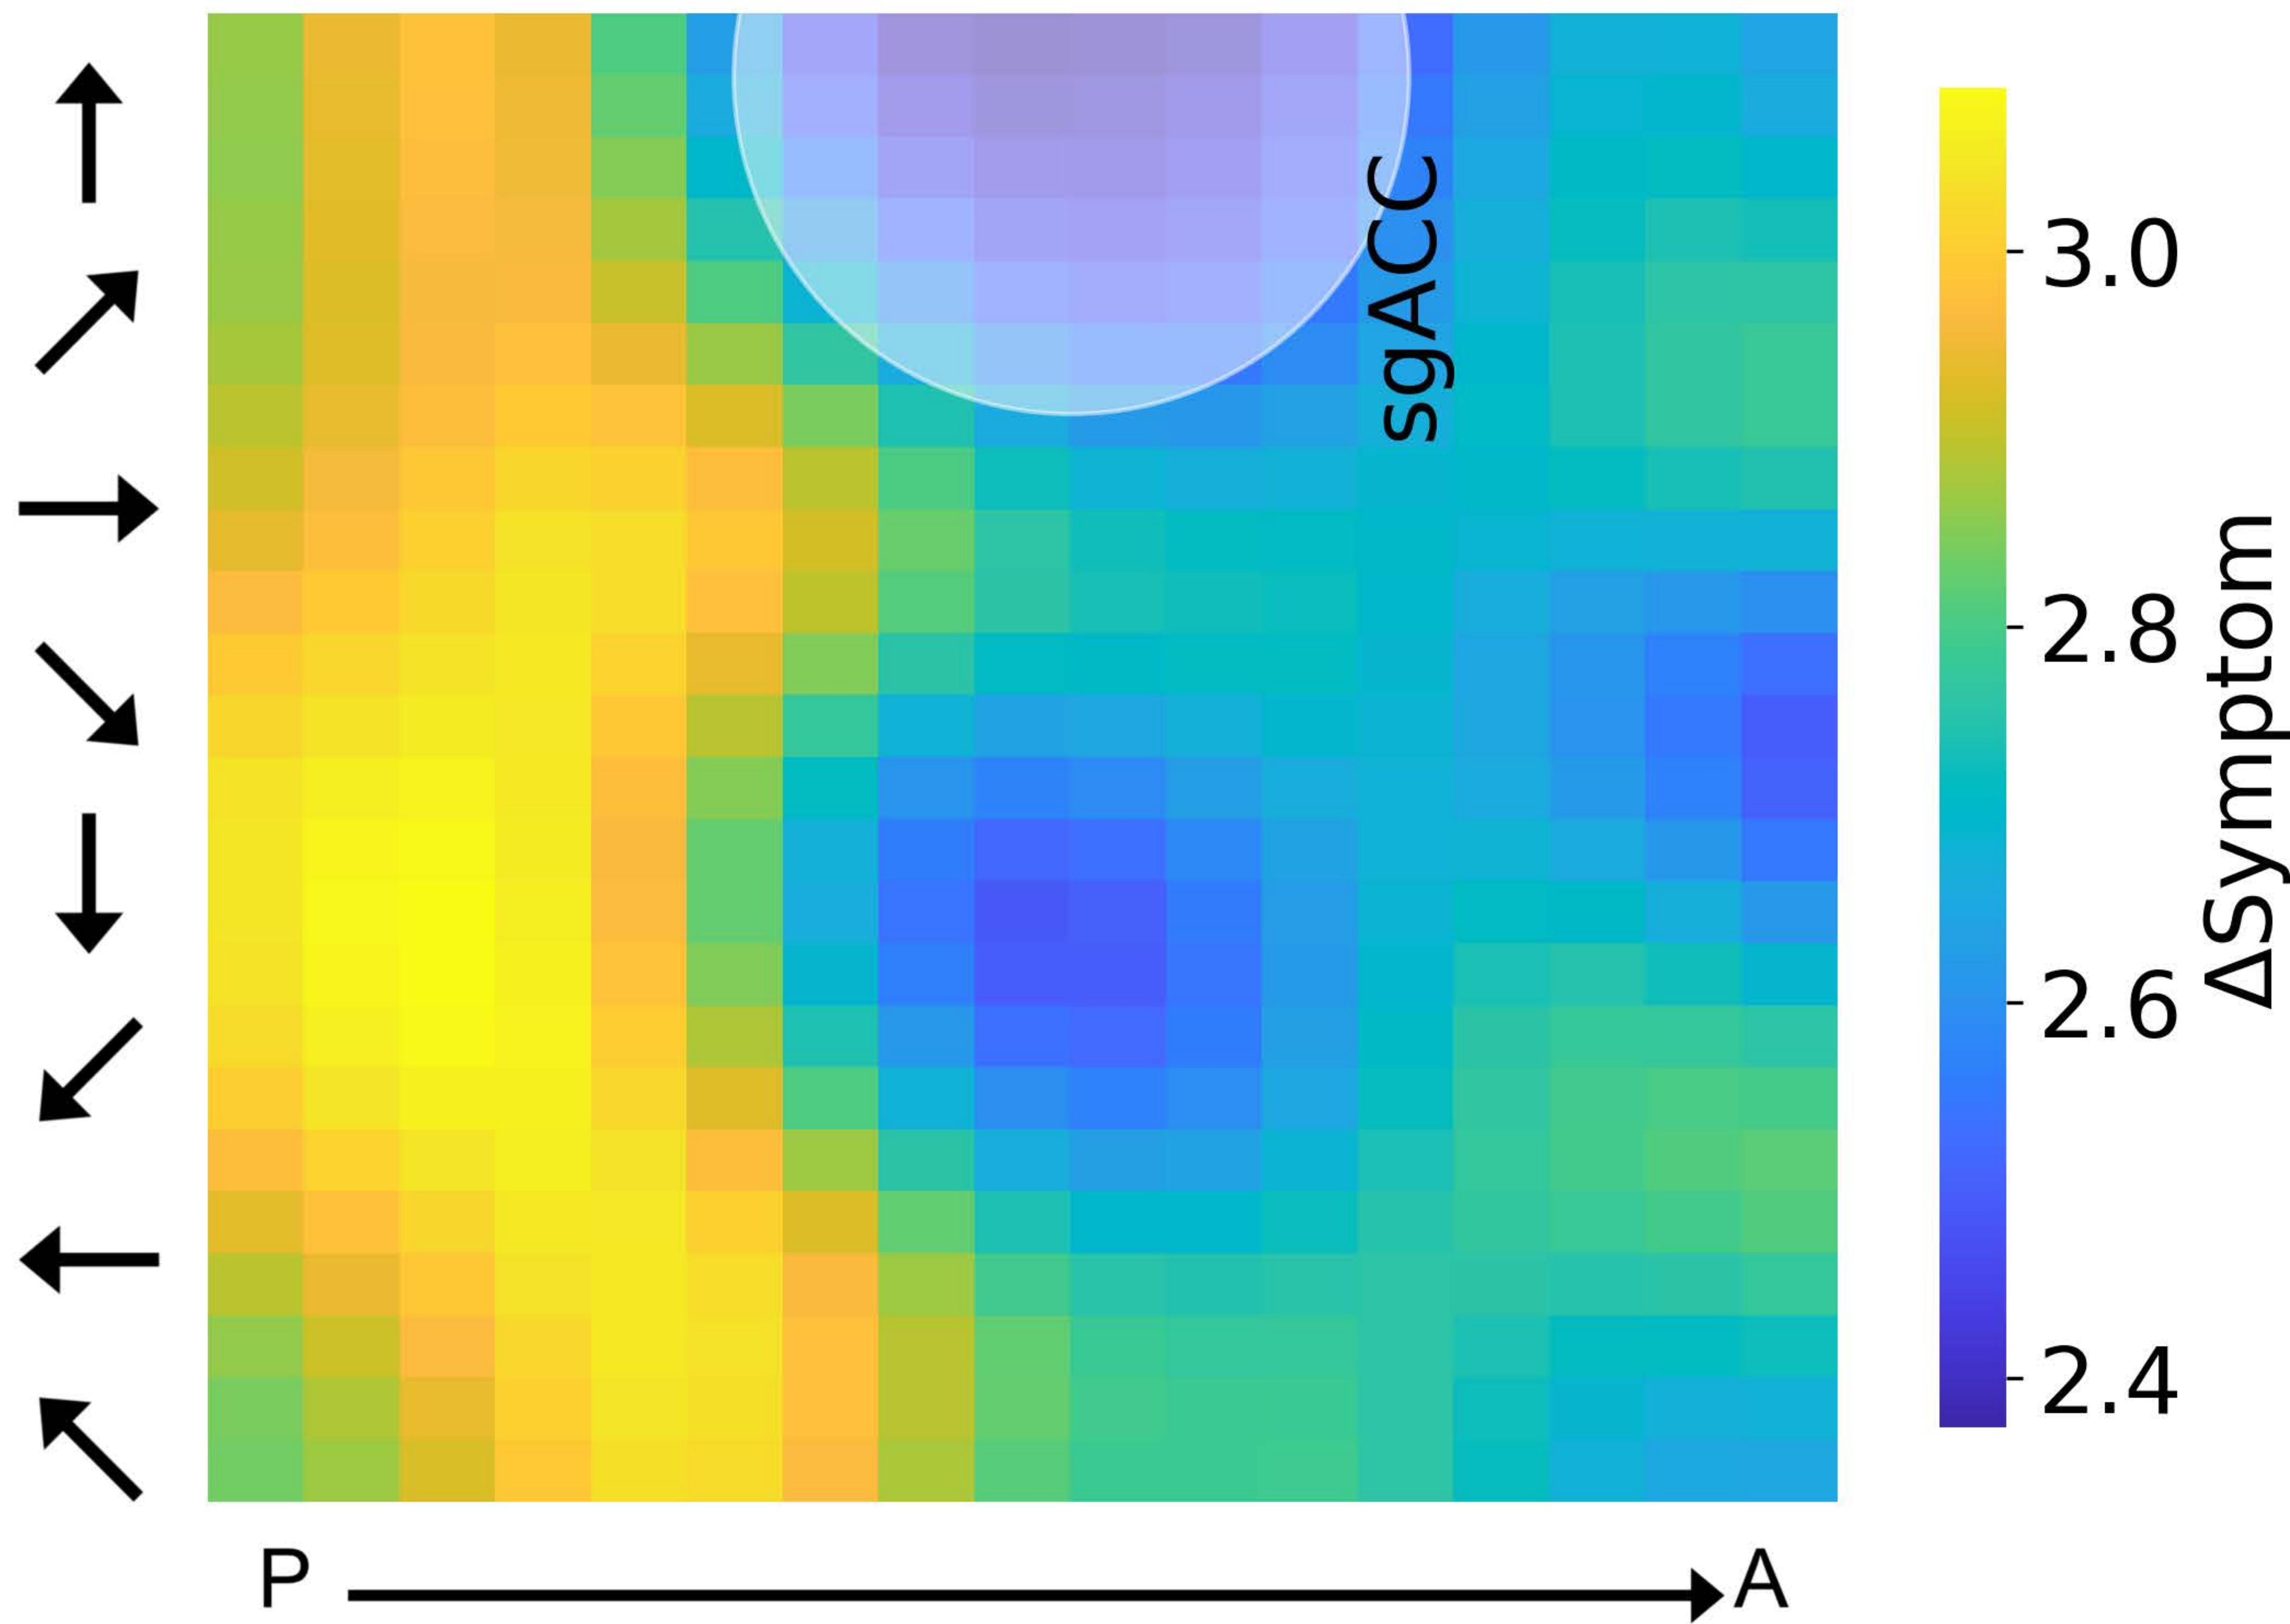



# NDARRRF879TA3\_madrs\_left\_dlpfc

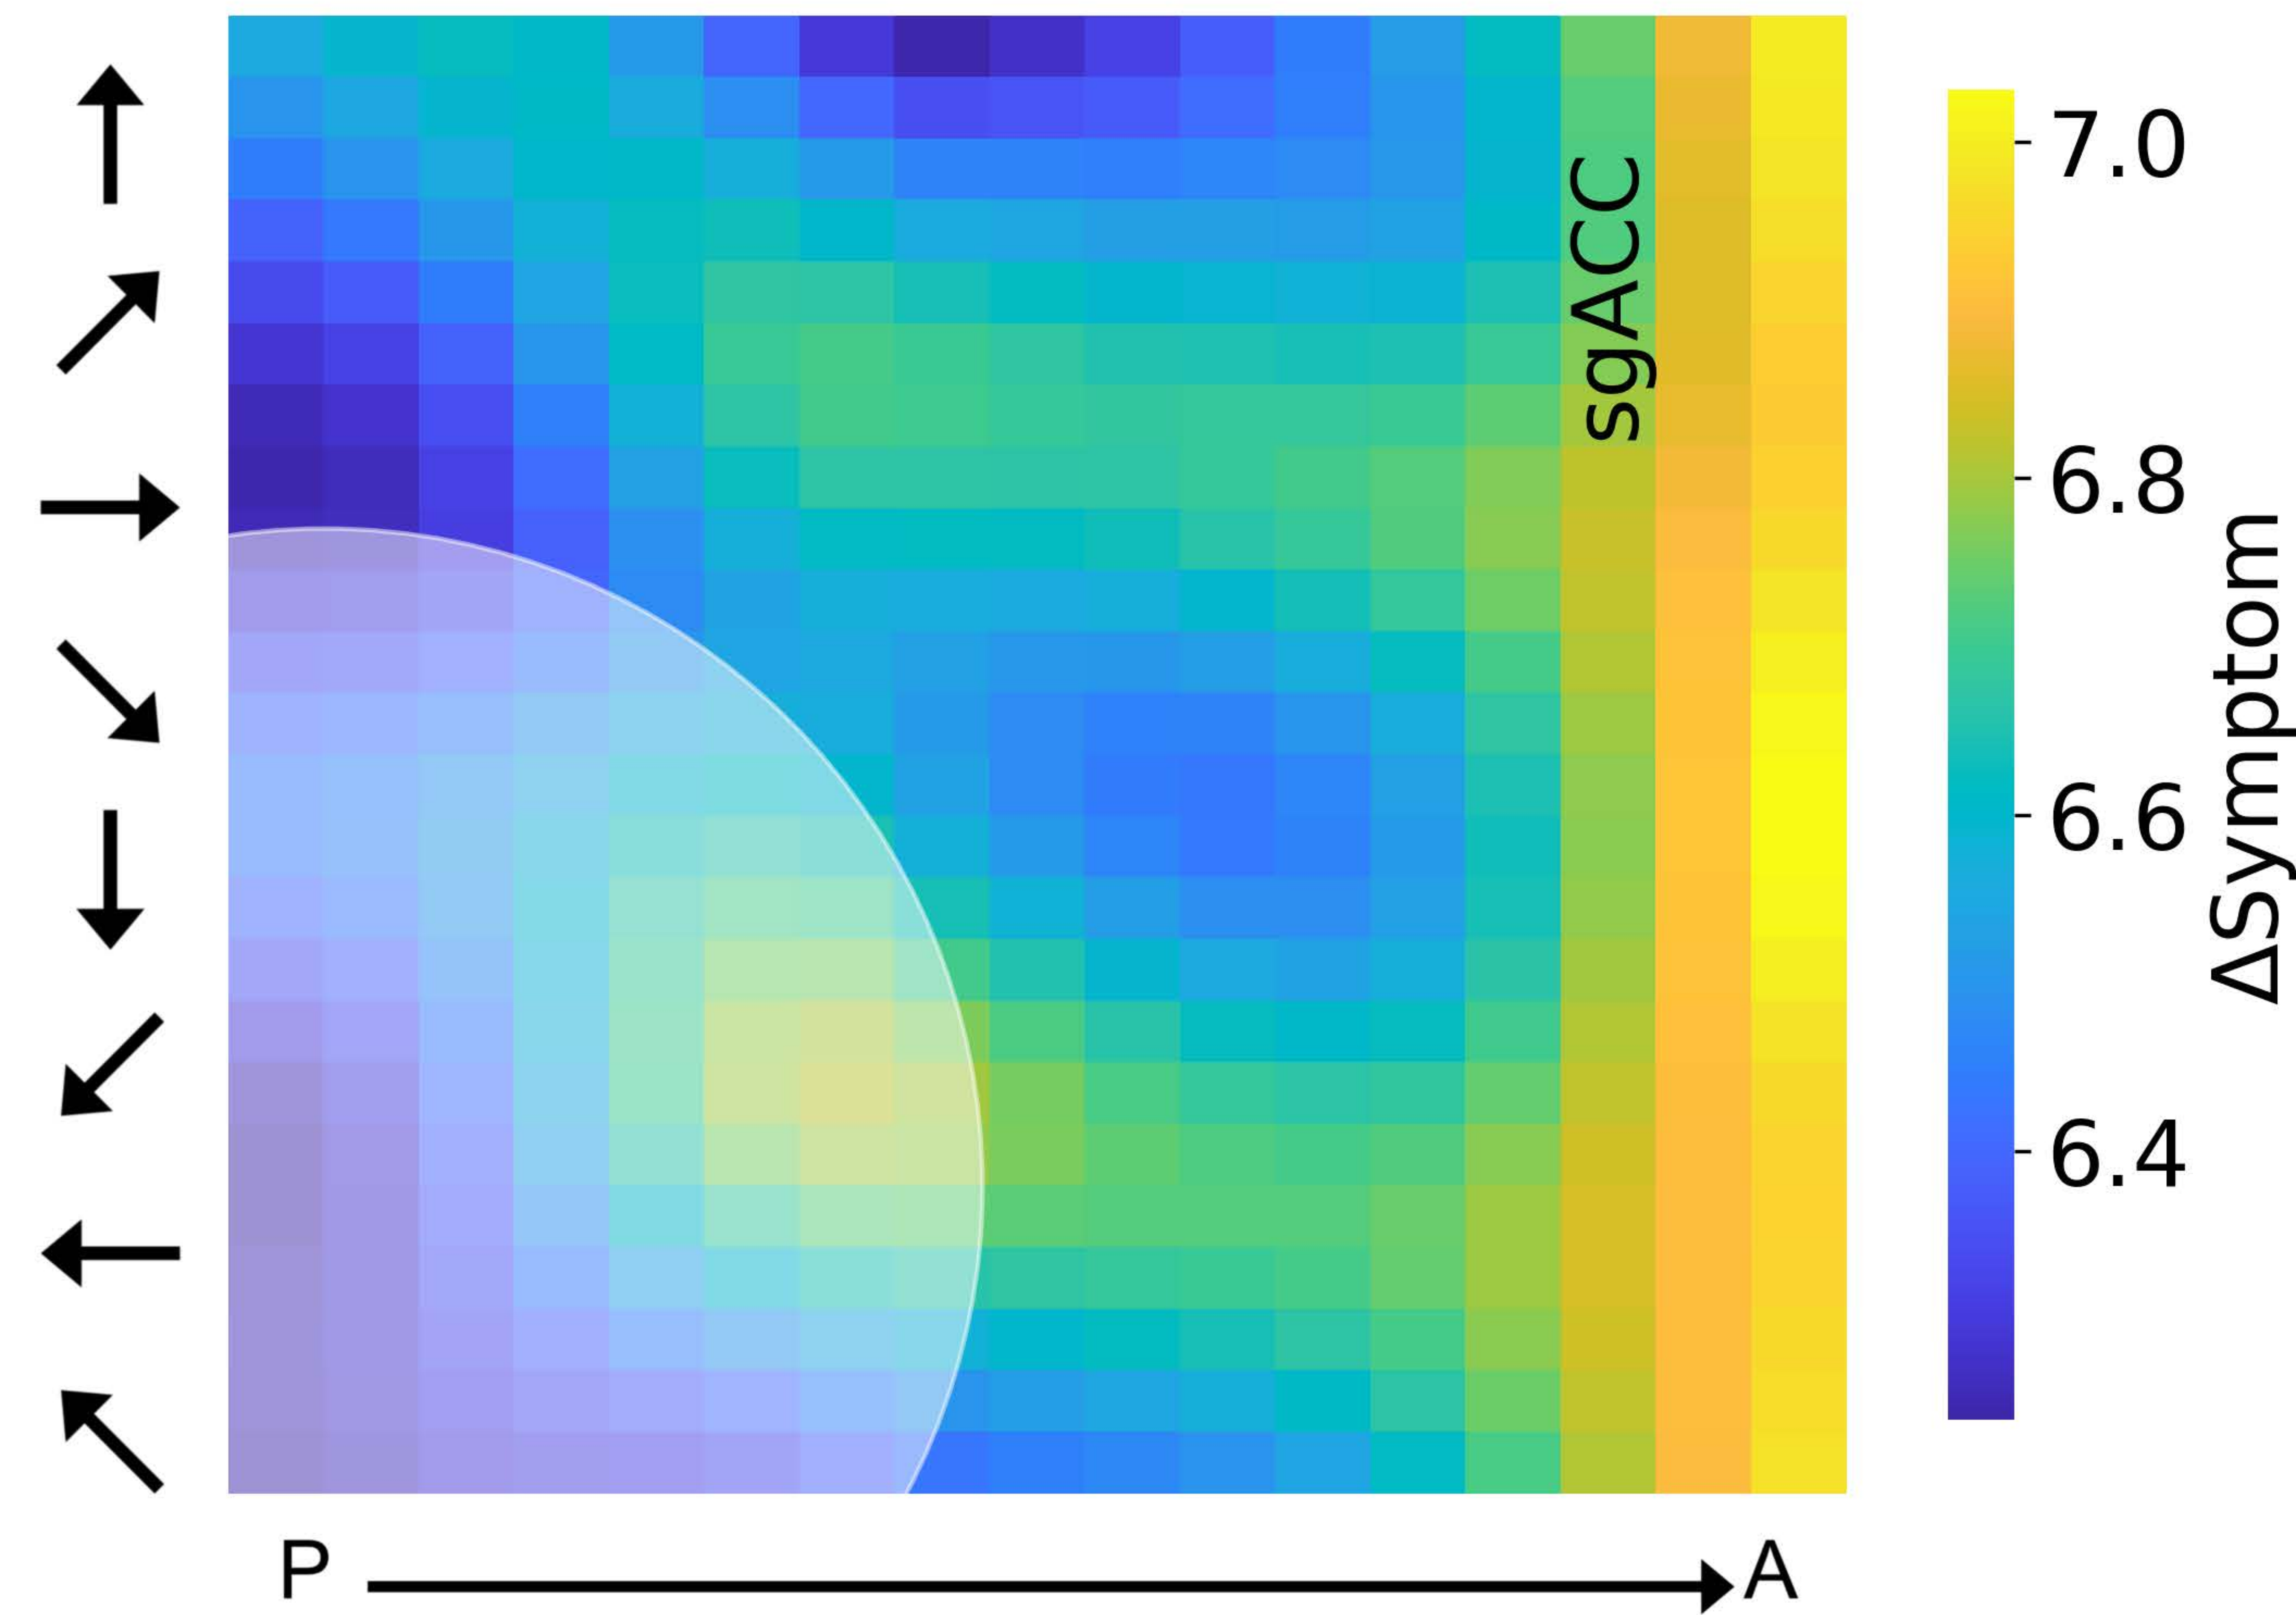



# NDARRRG943WGE\_madrs\_left\_dlpfc

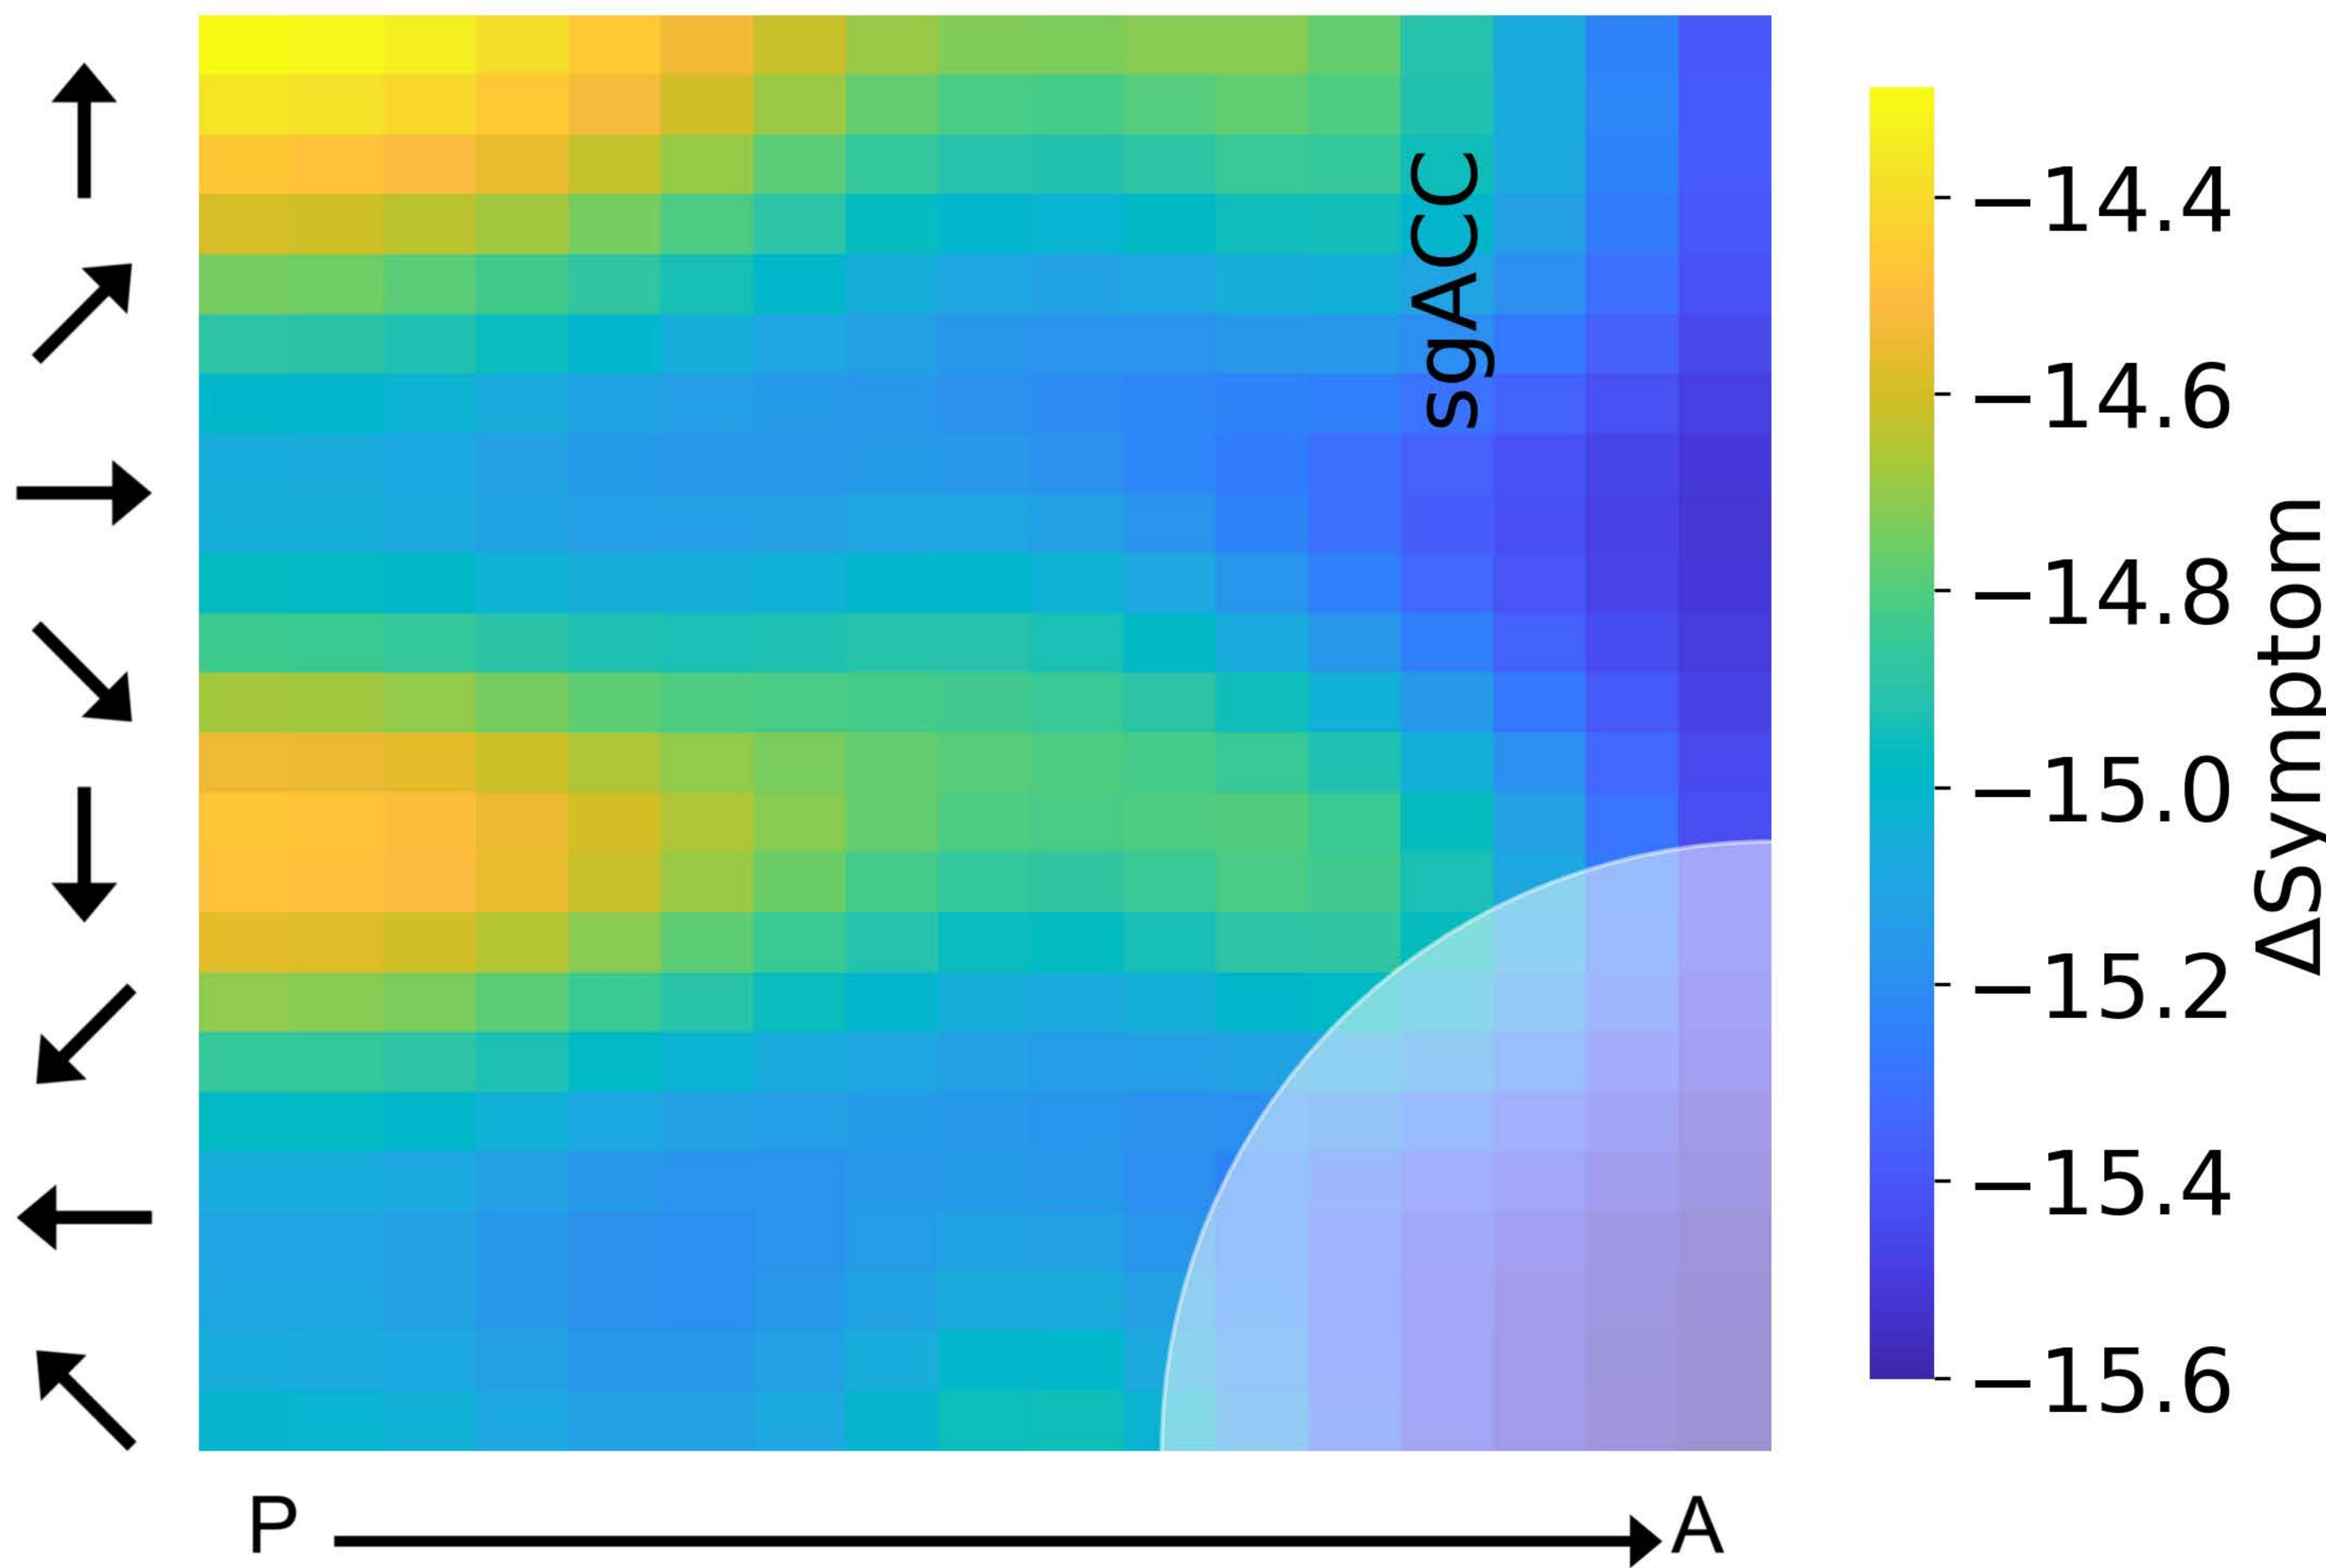



# NDARRRM328EP8\_madr\_left\_dlpfc

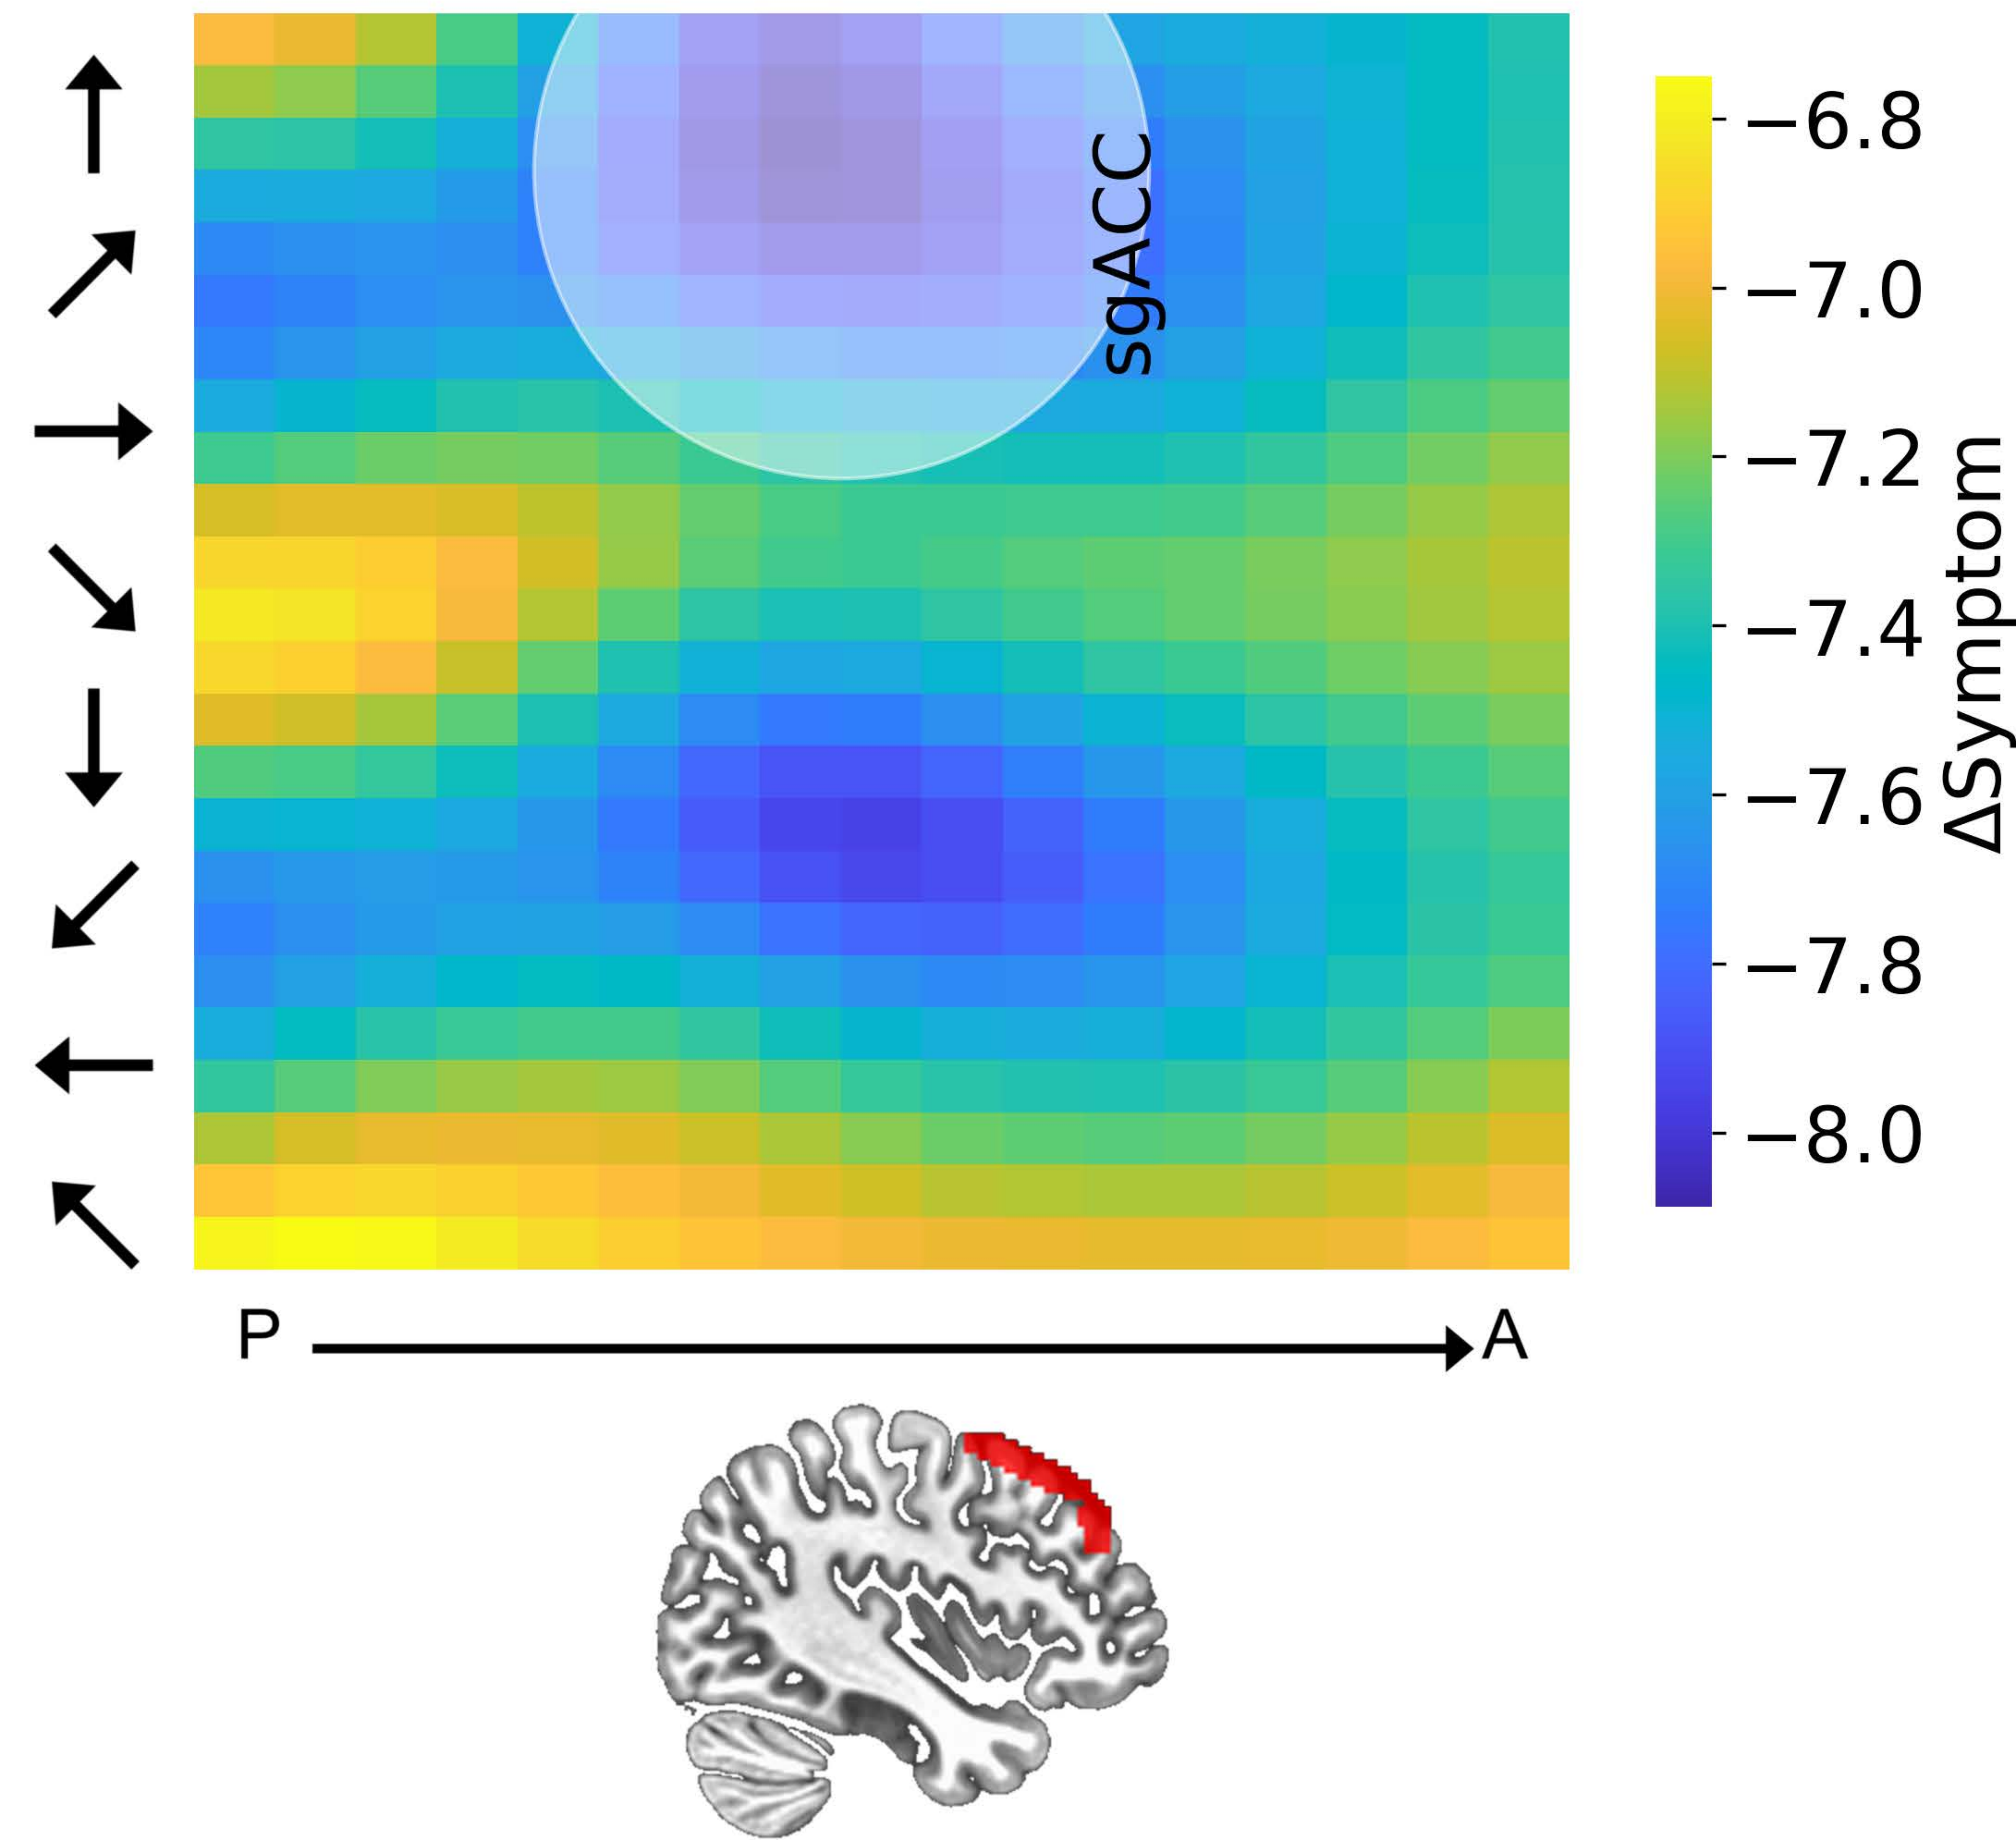



# NDARRRZ612NKG\_madrs\_left\_dlpfc

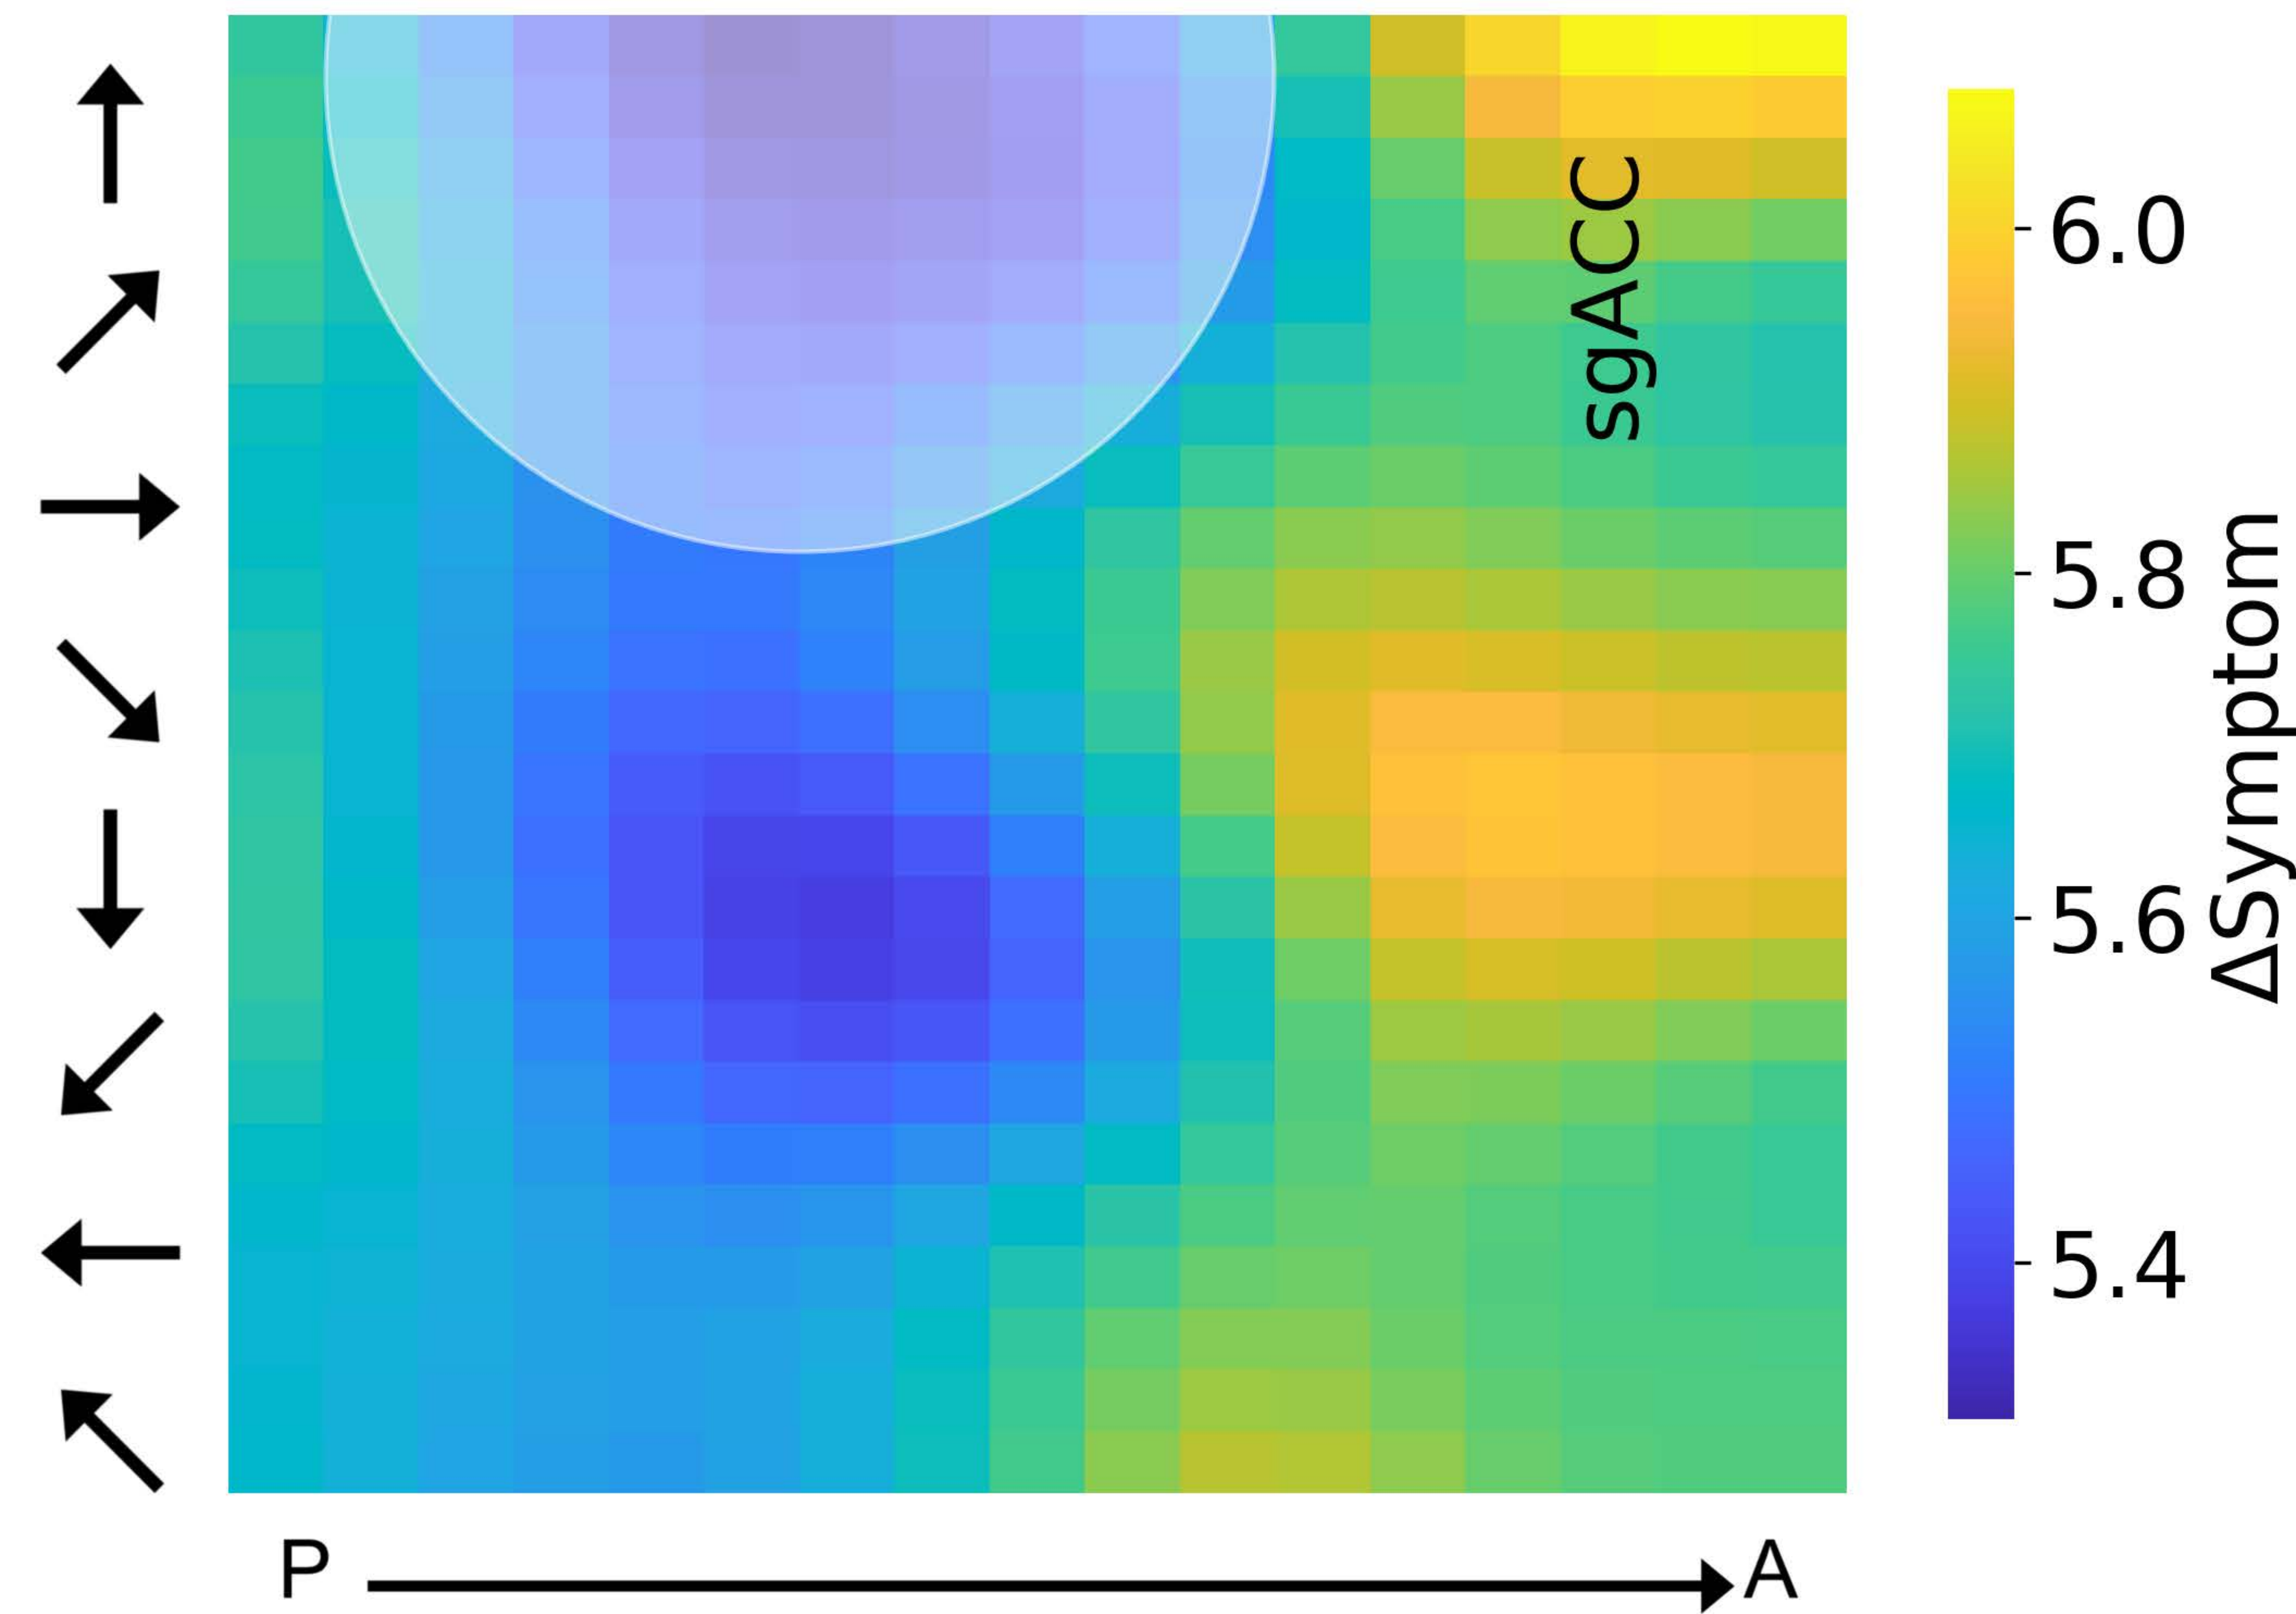



# INDARTH509MNV\_madrs\_left\_dlpfc

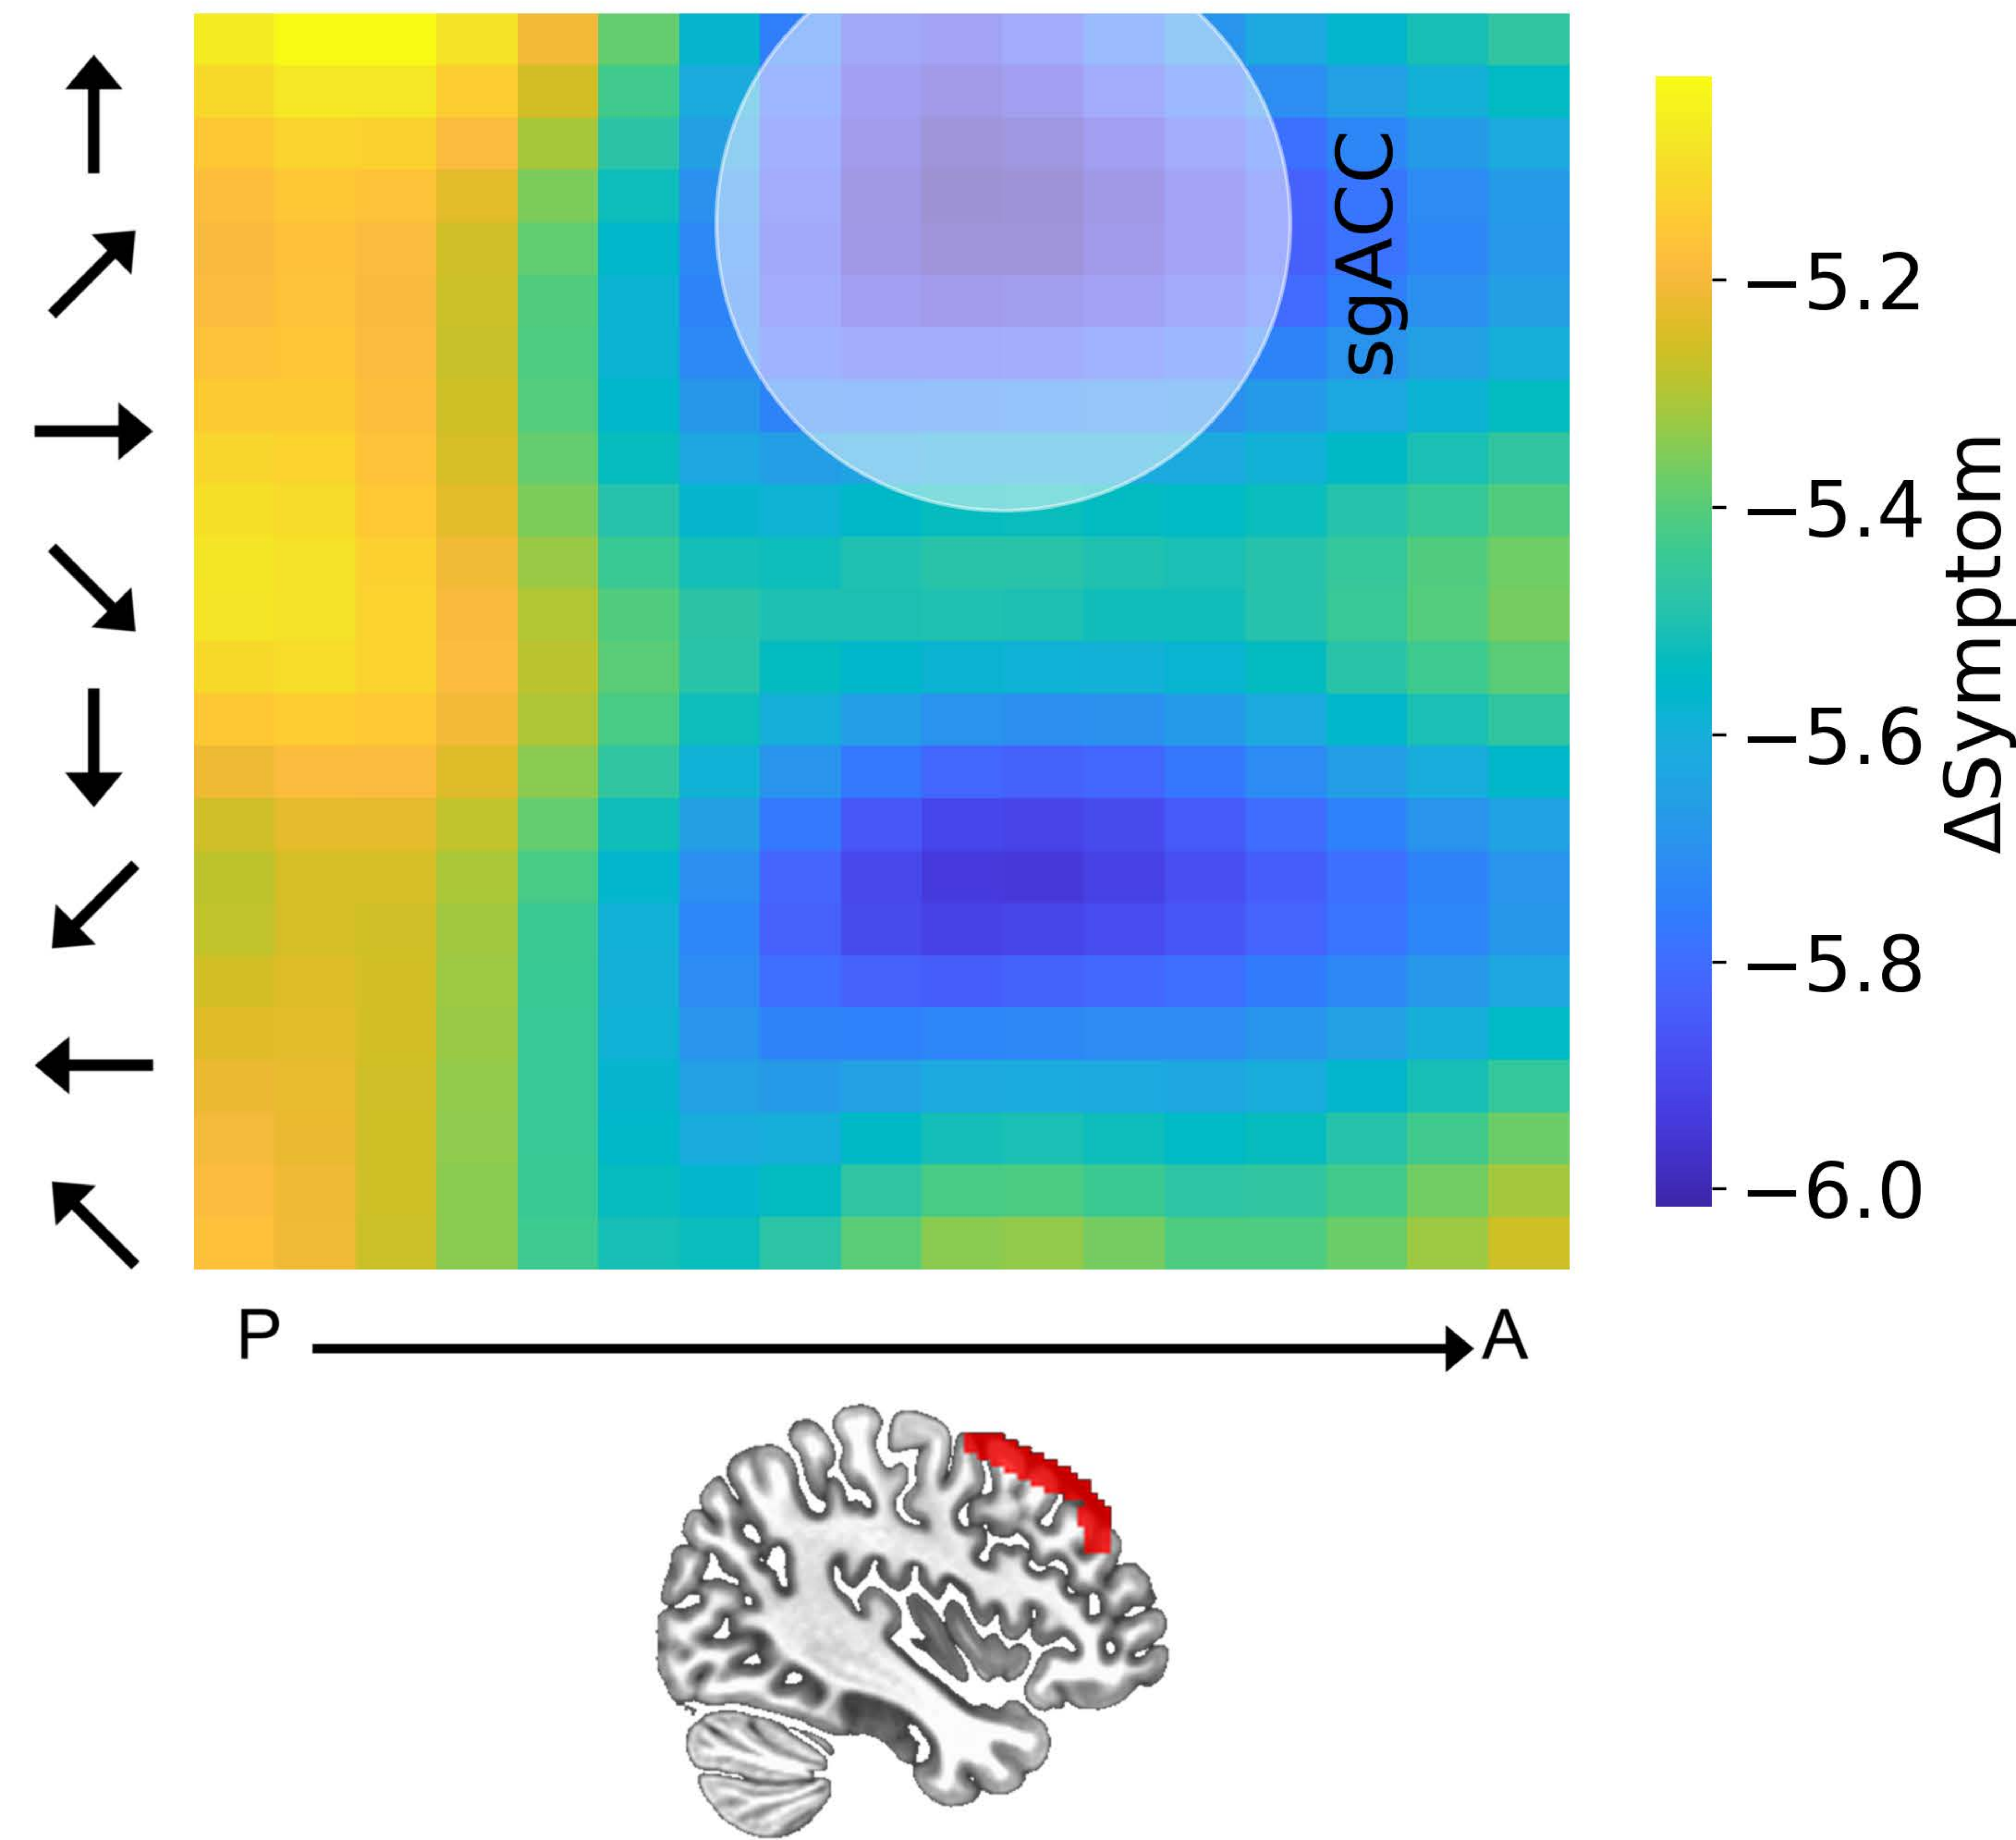



# NDARTT796GJK\_madr\_left\_dlpfc

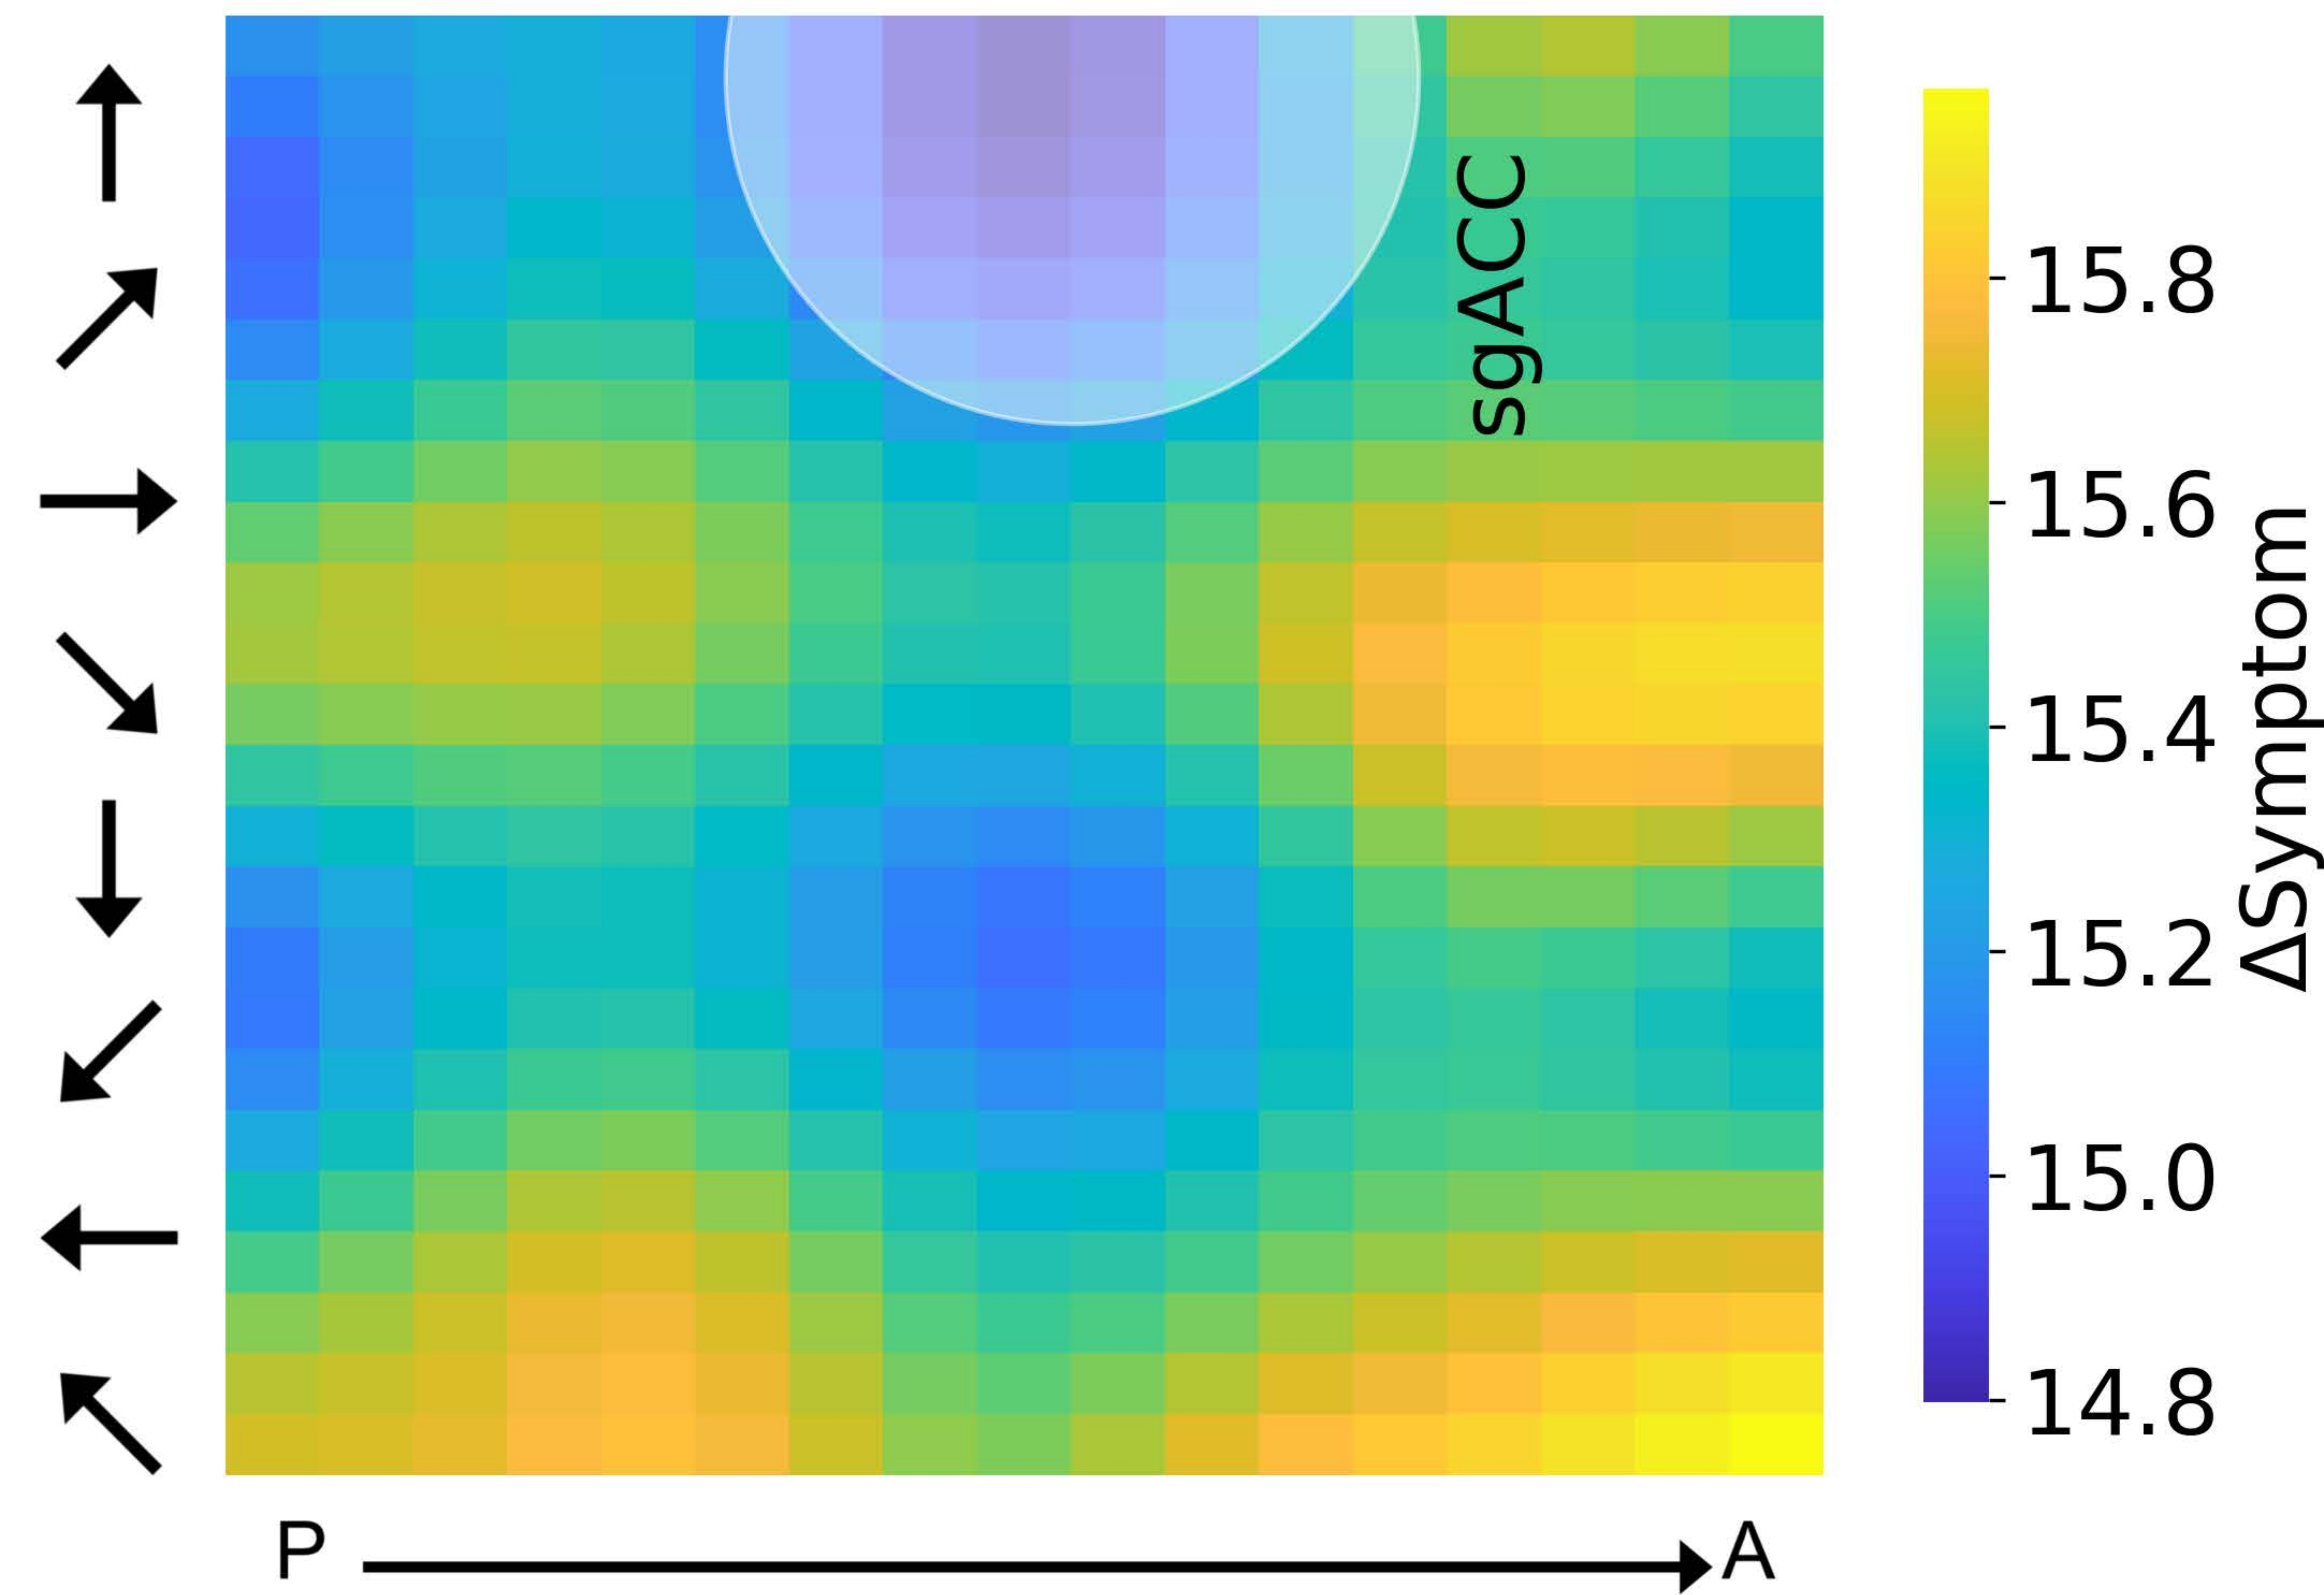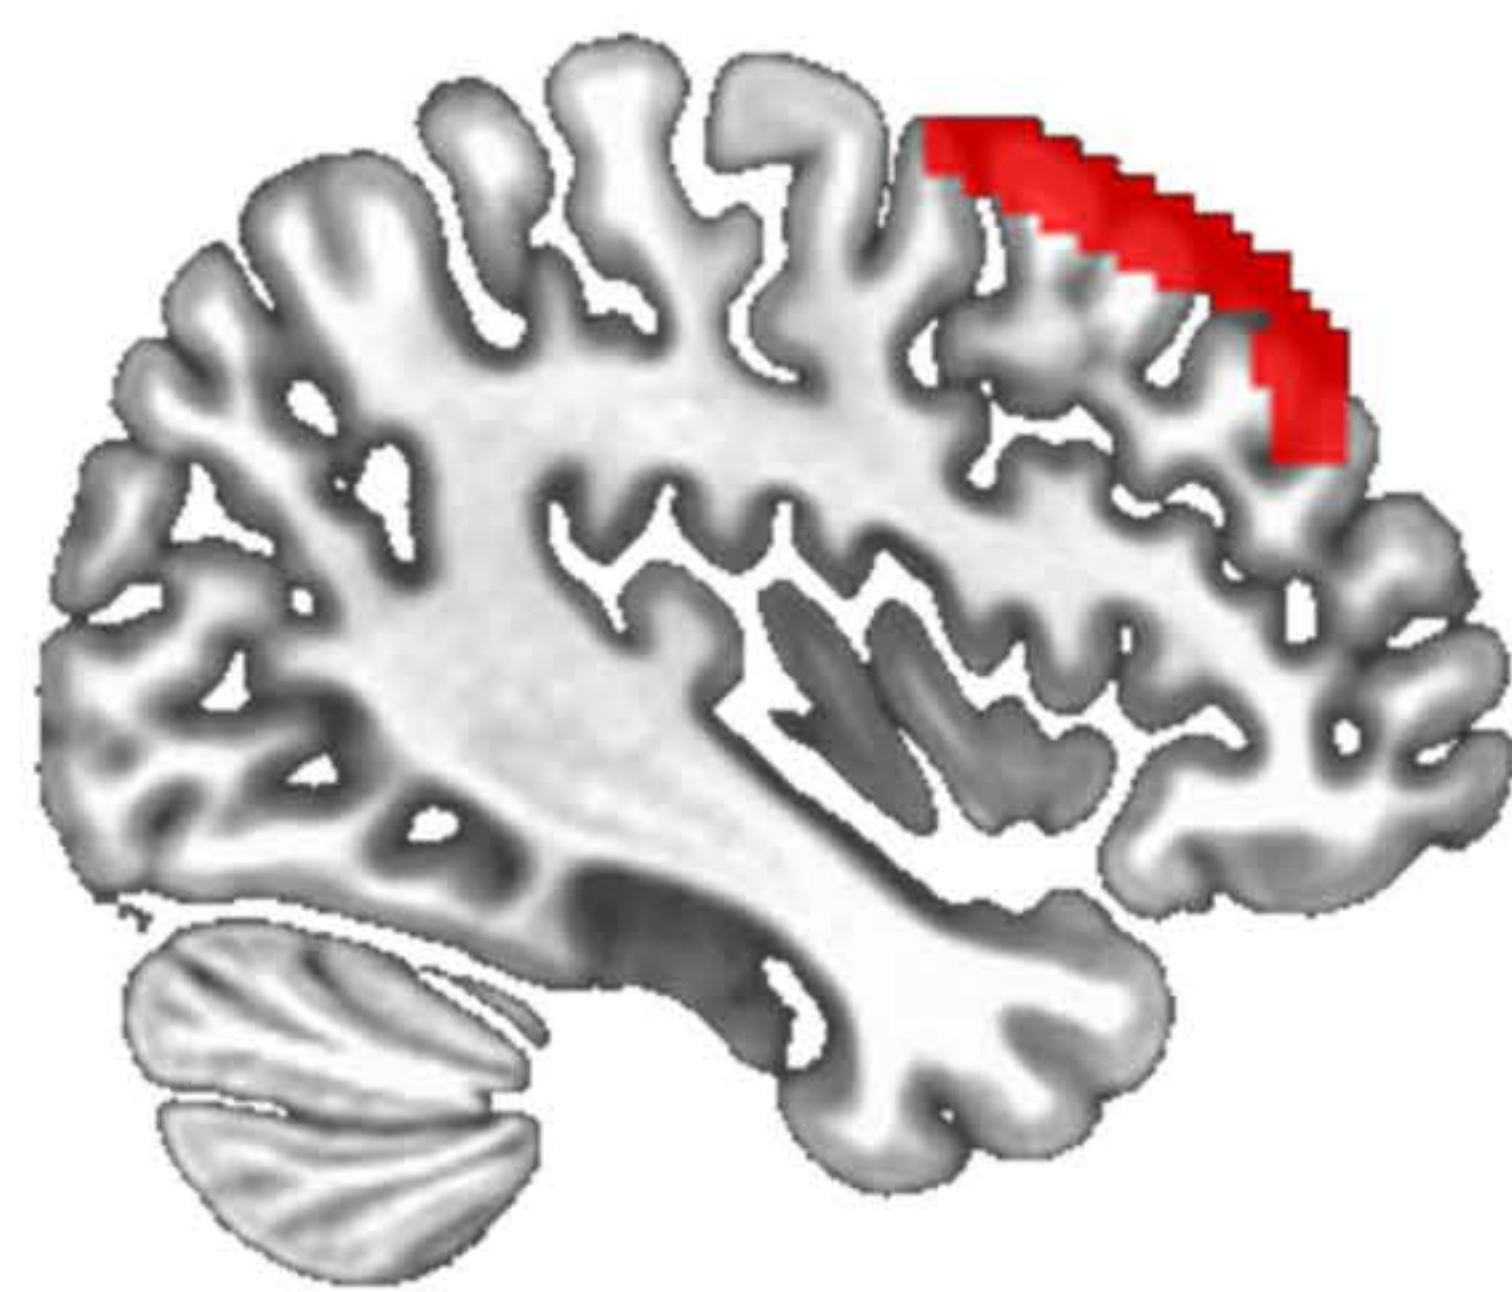



# NDARTZ590DYE\_madrs\_left\_dlpfc

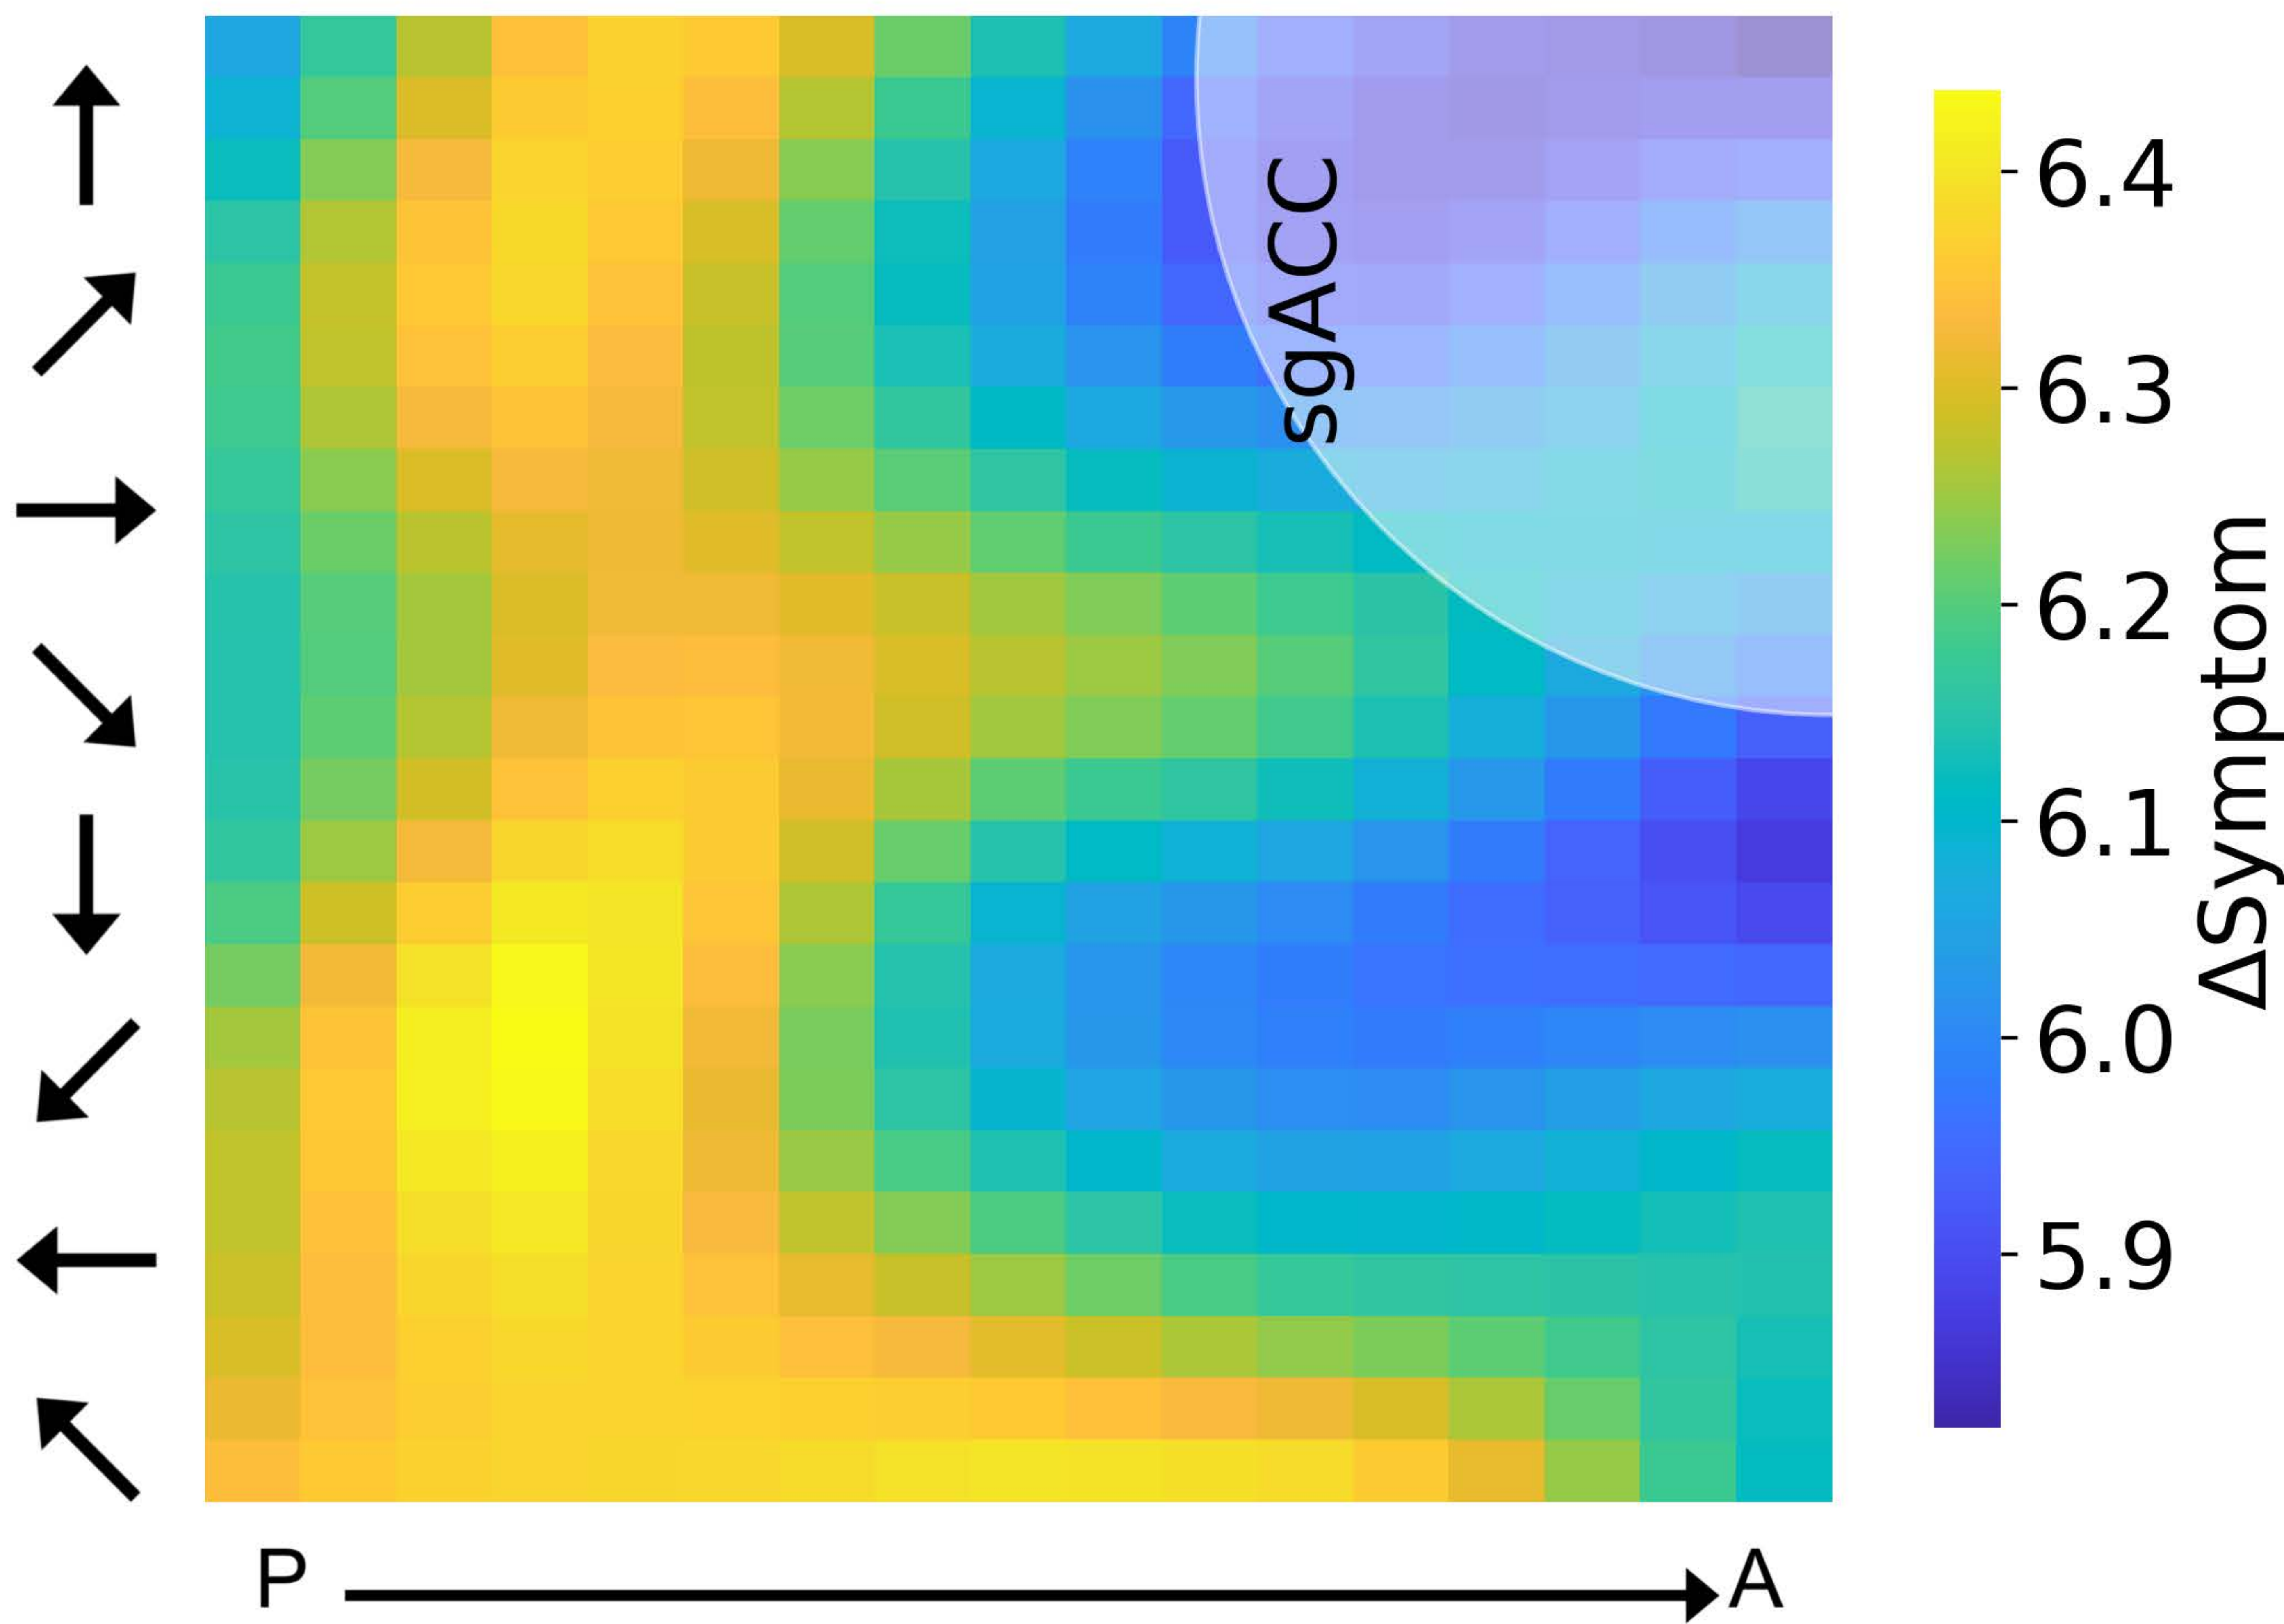



# NDARUJ223ZPN\_madrs\_left\_dlpfc

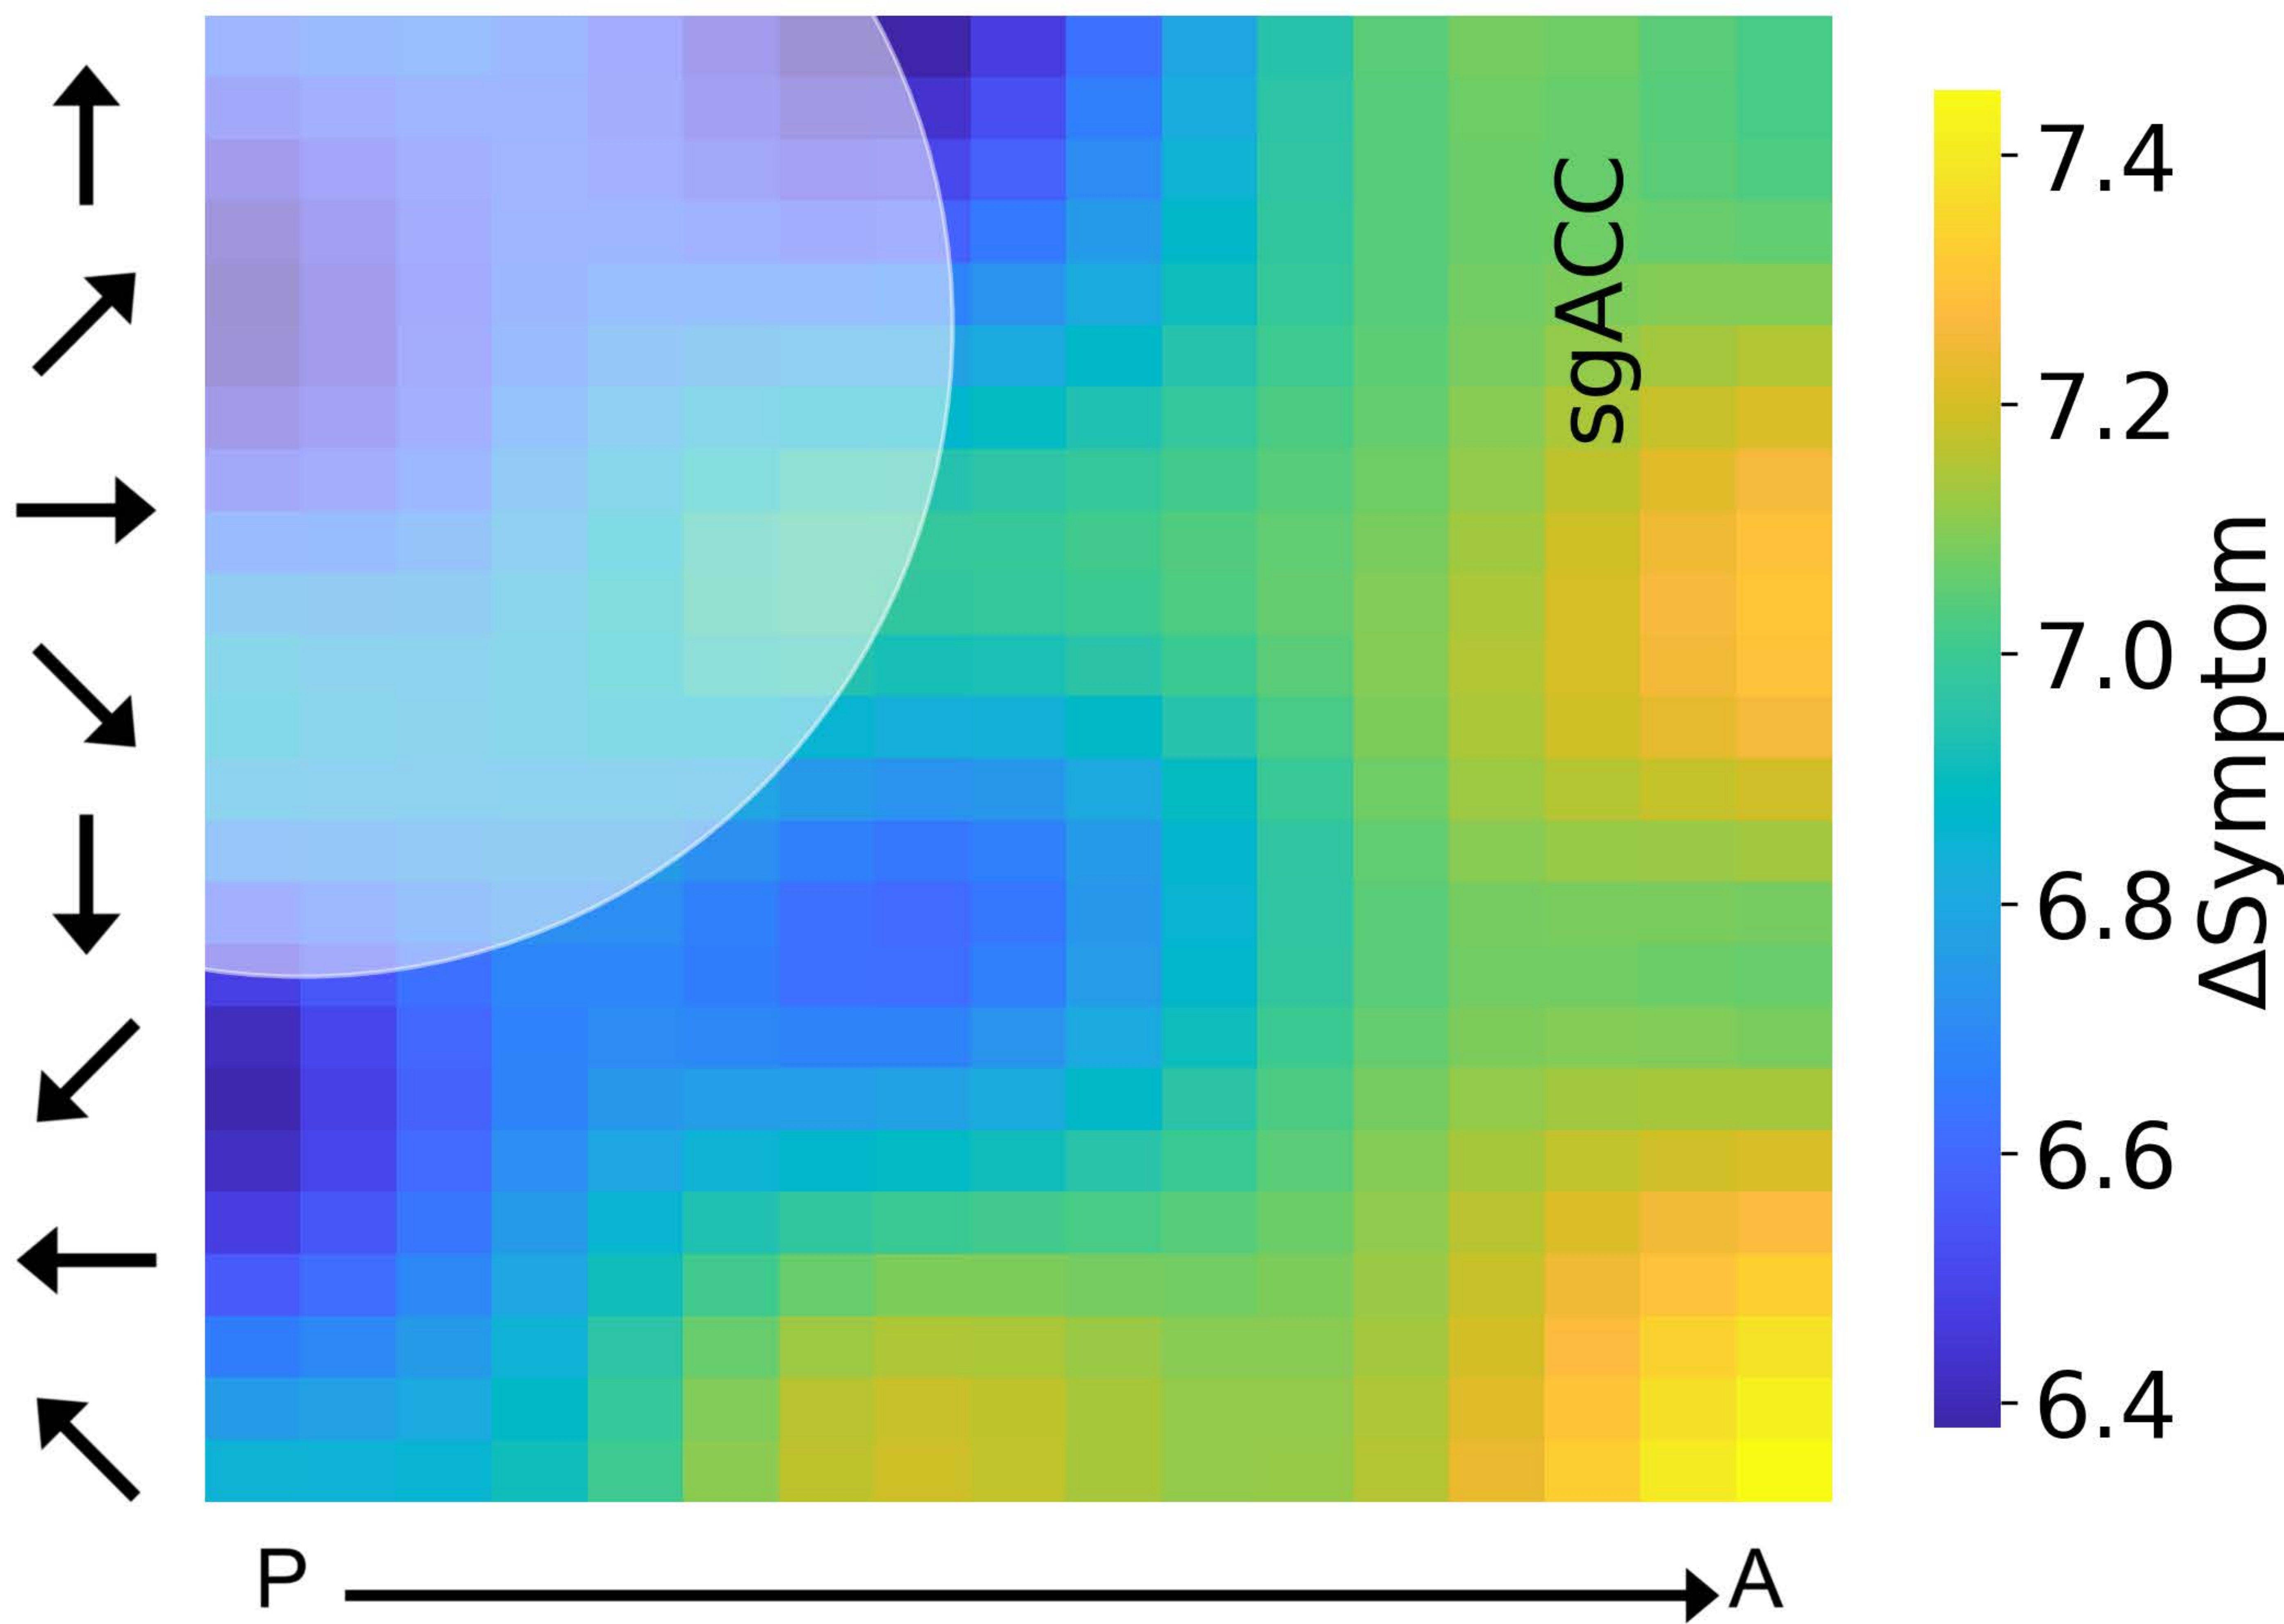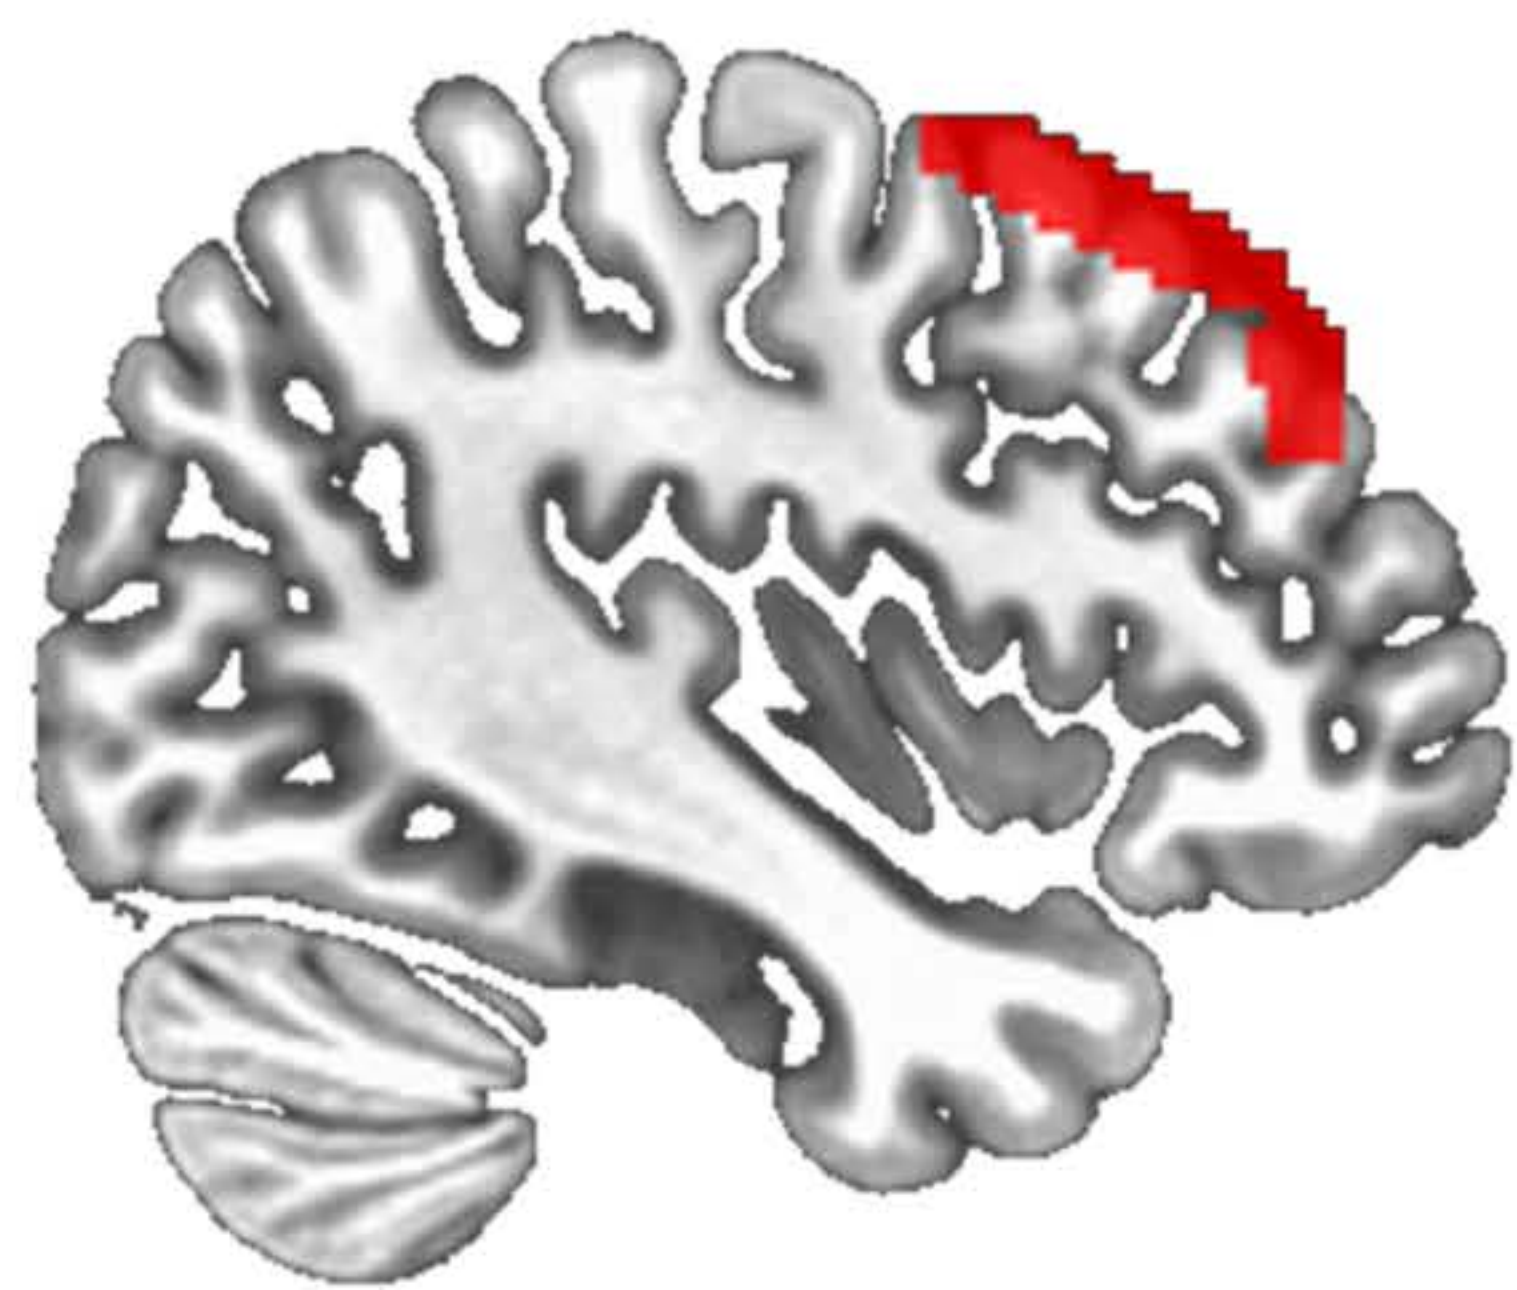



# NDARUM818JC1\_madrs\_left\_dlpfc

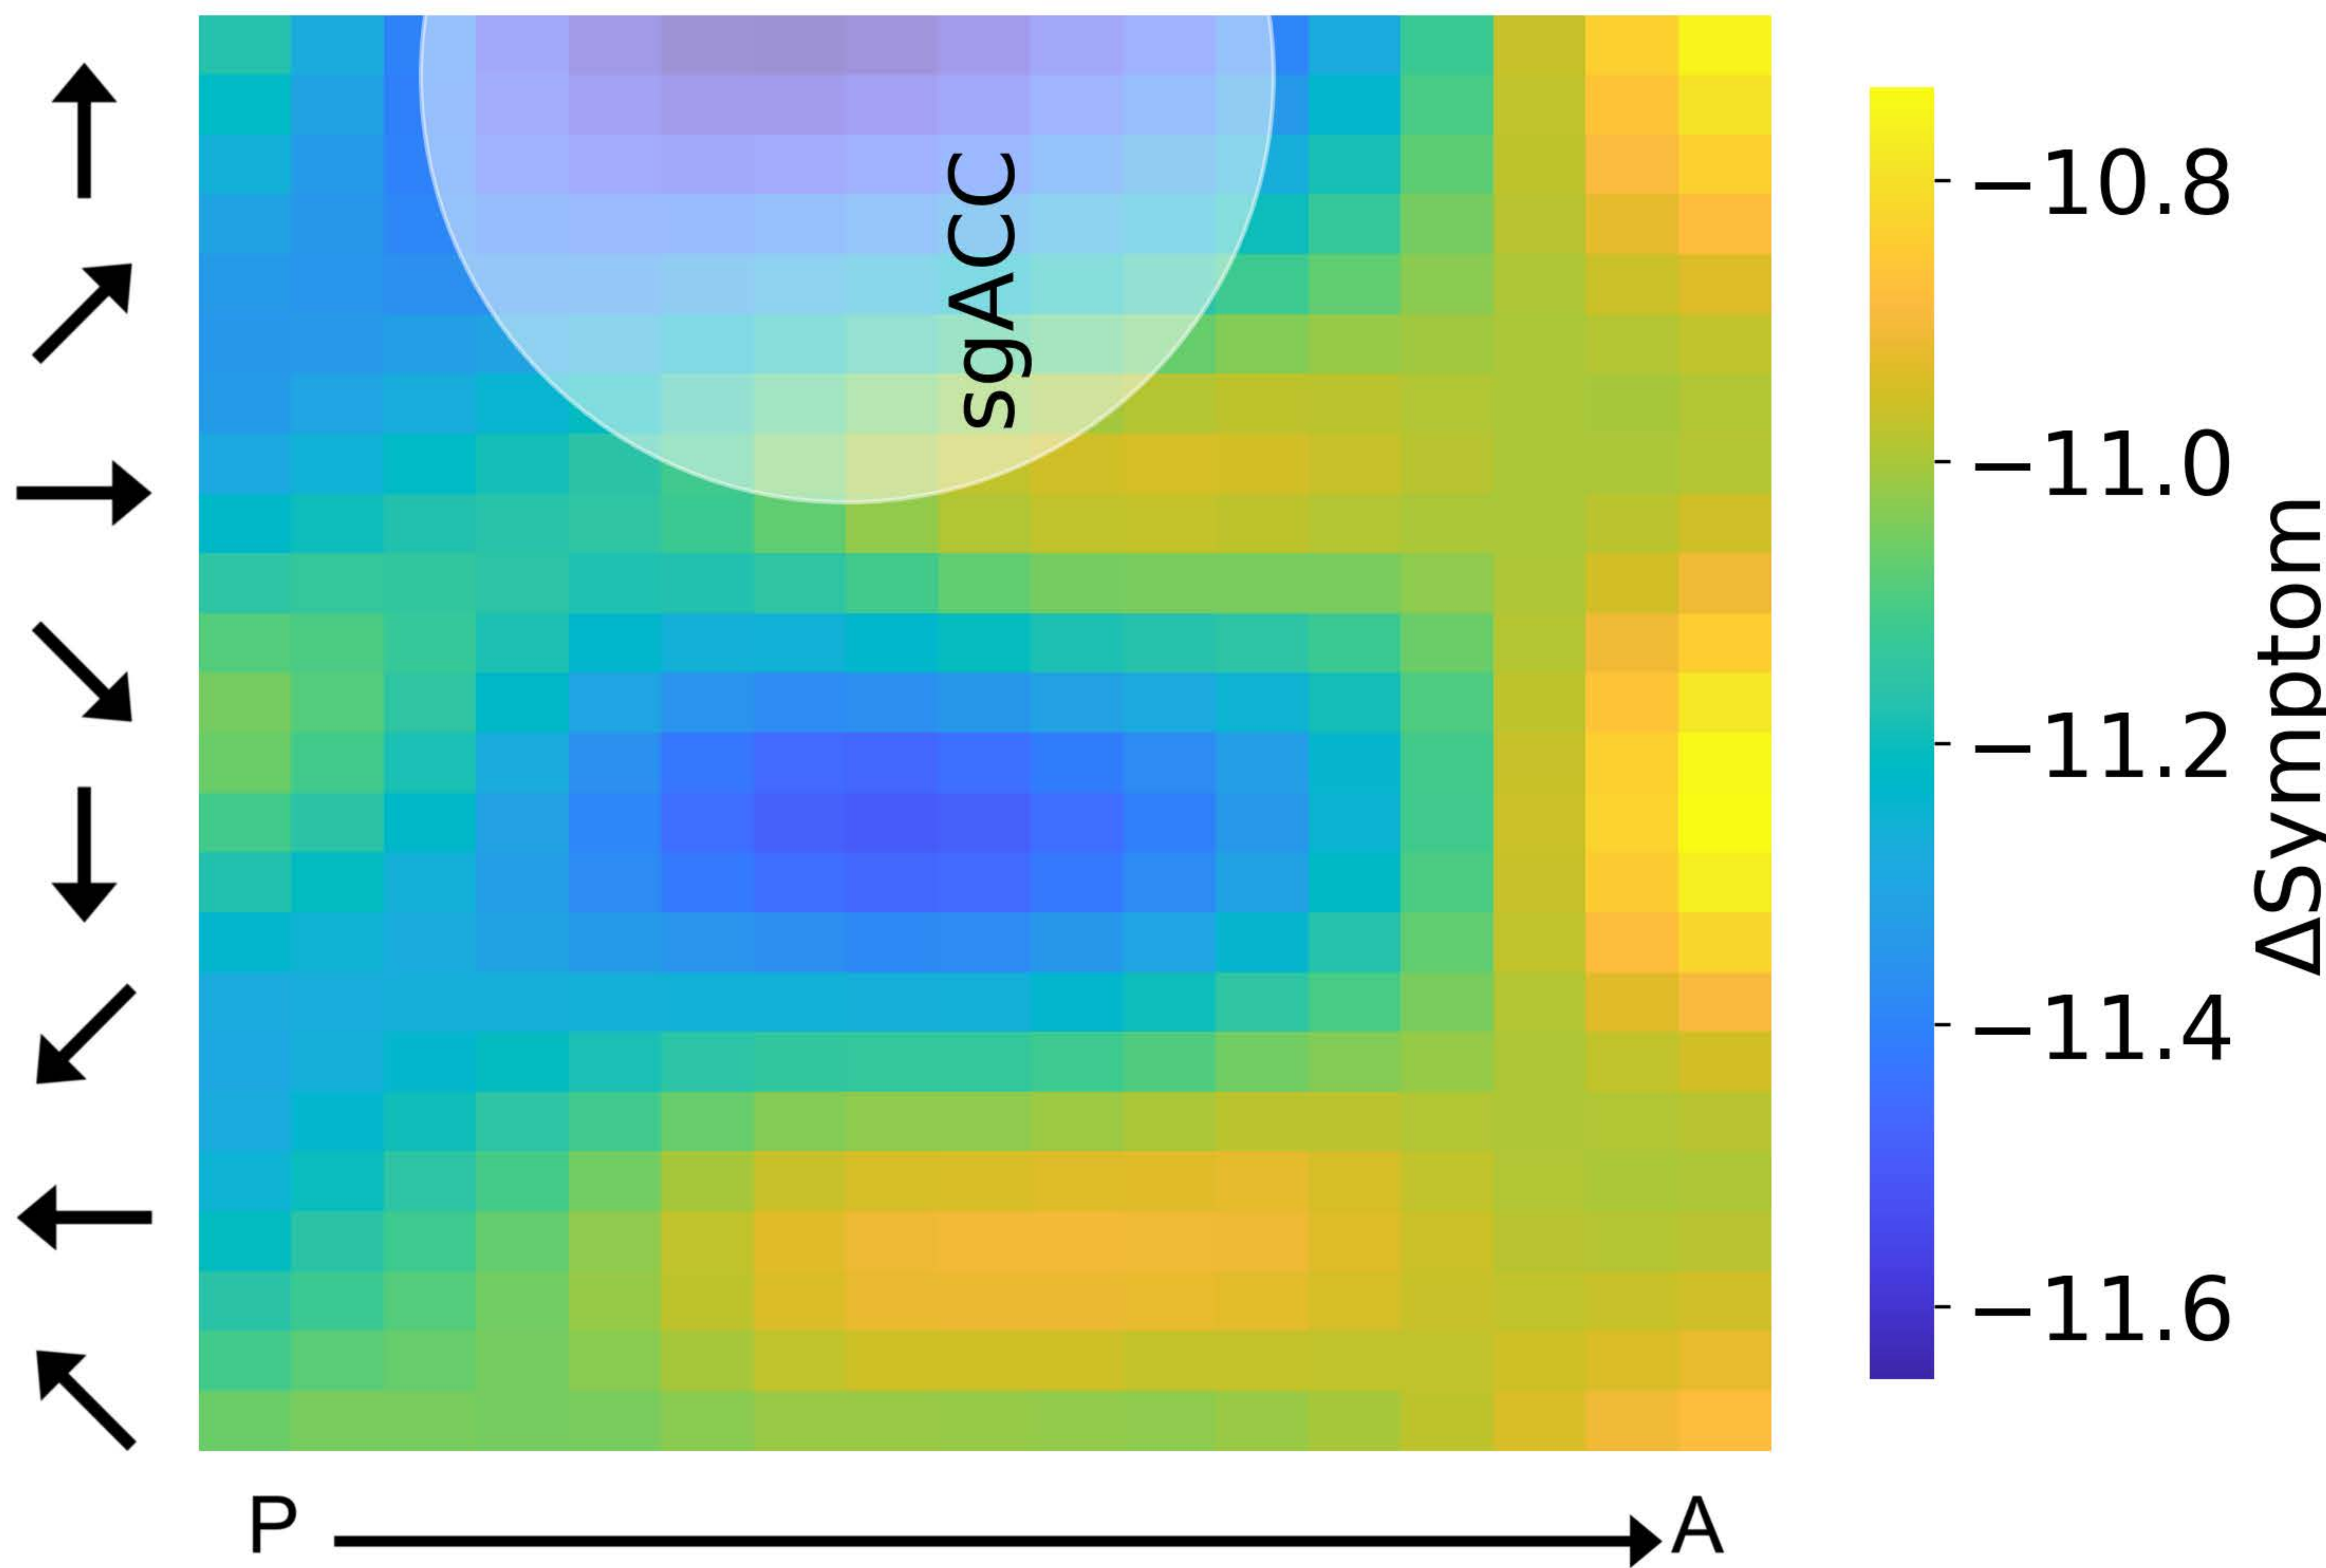



# INDARUT852KUX\_madr\_left\_dlpfc

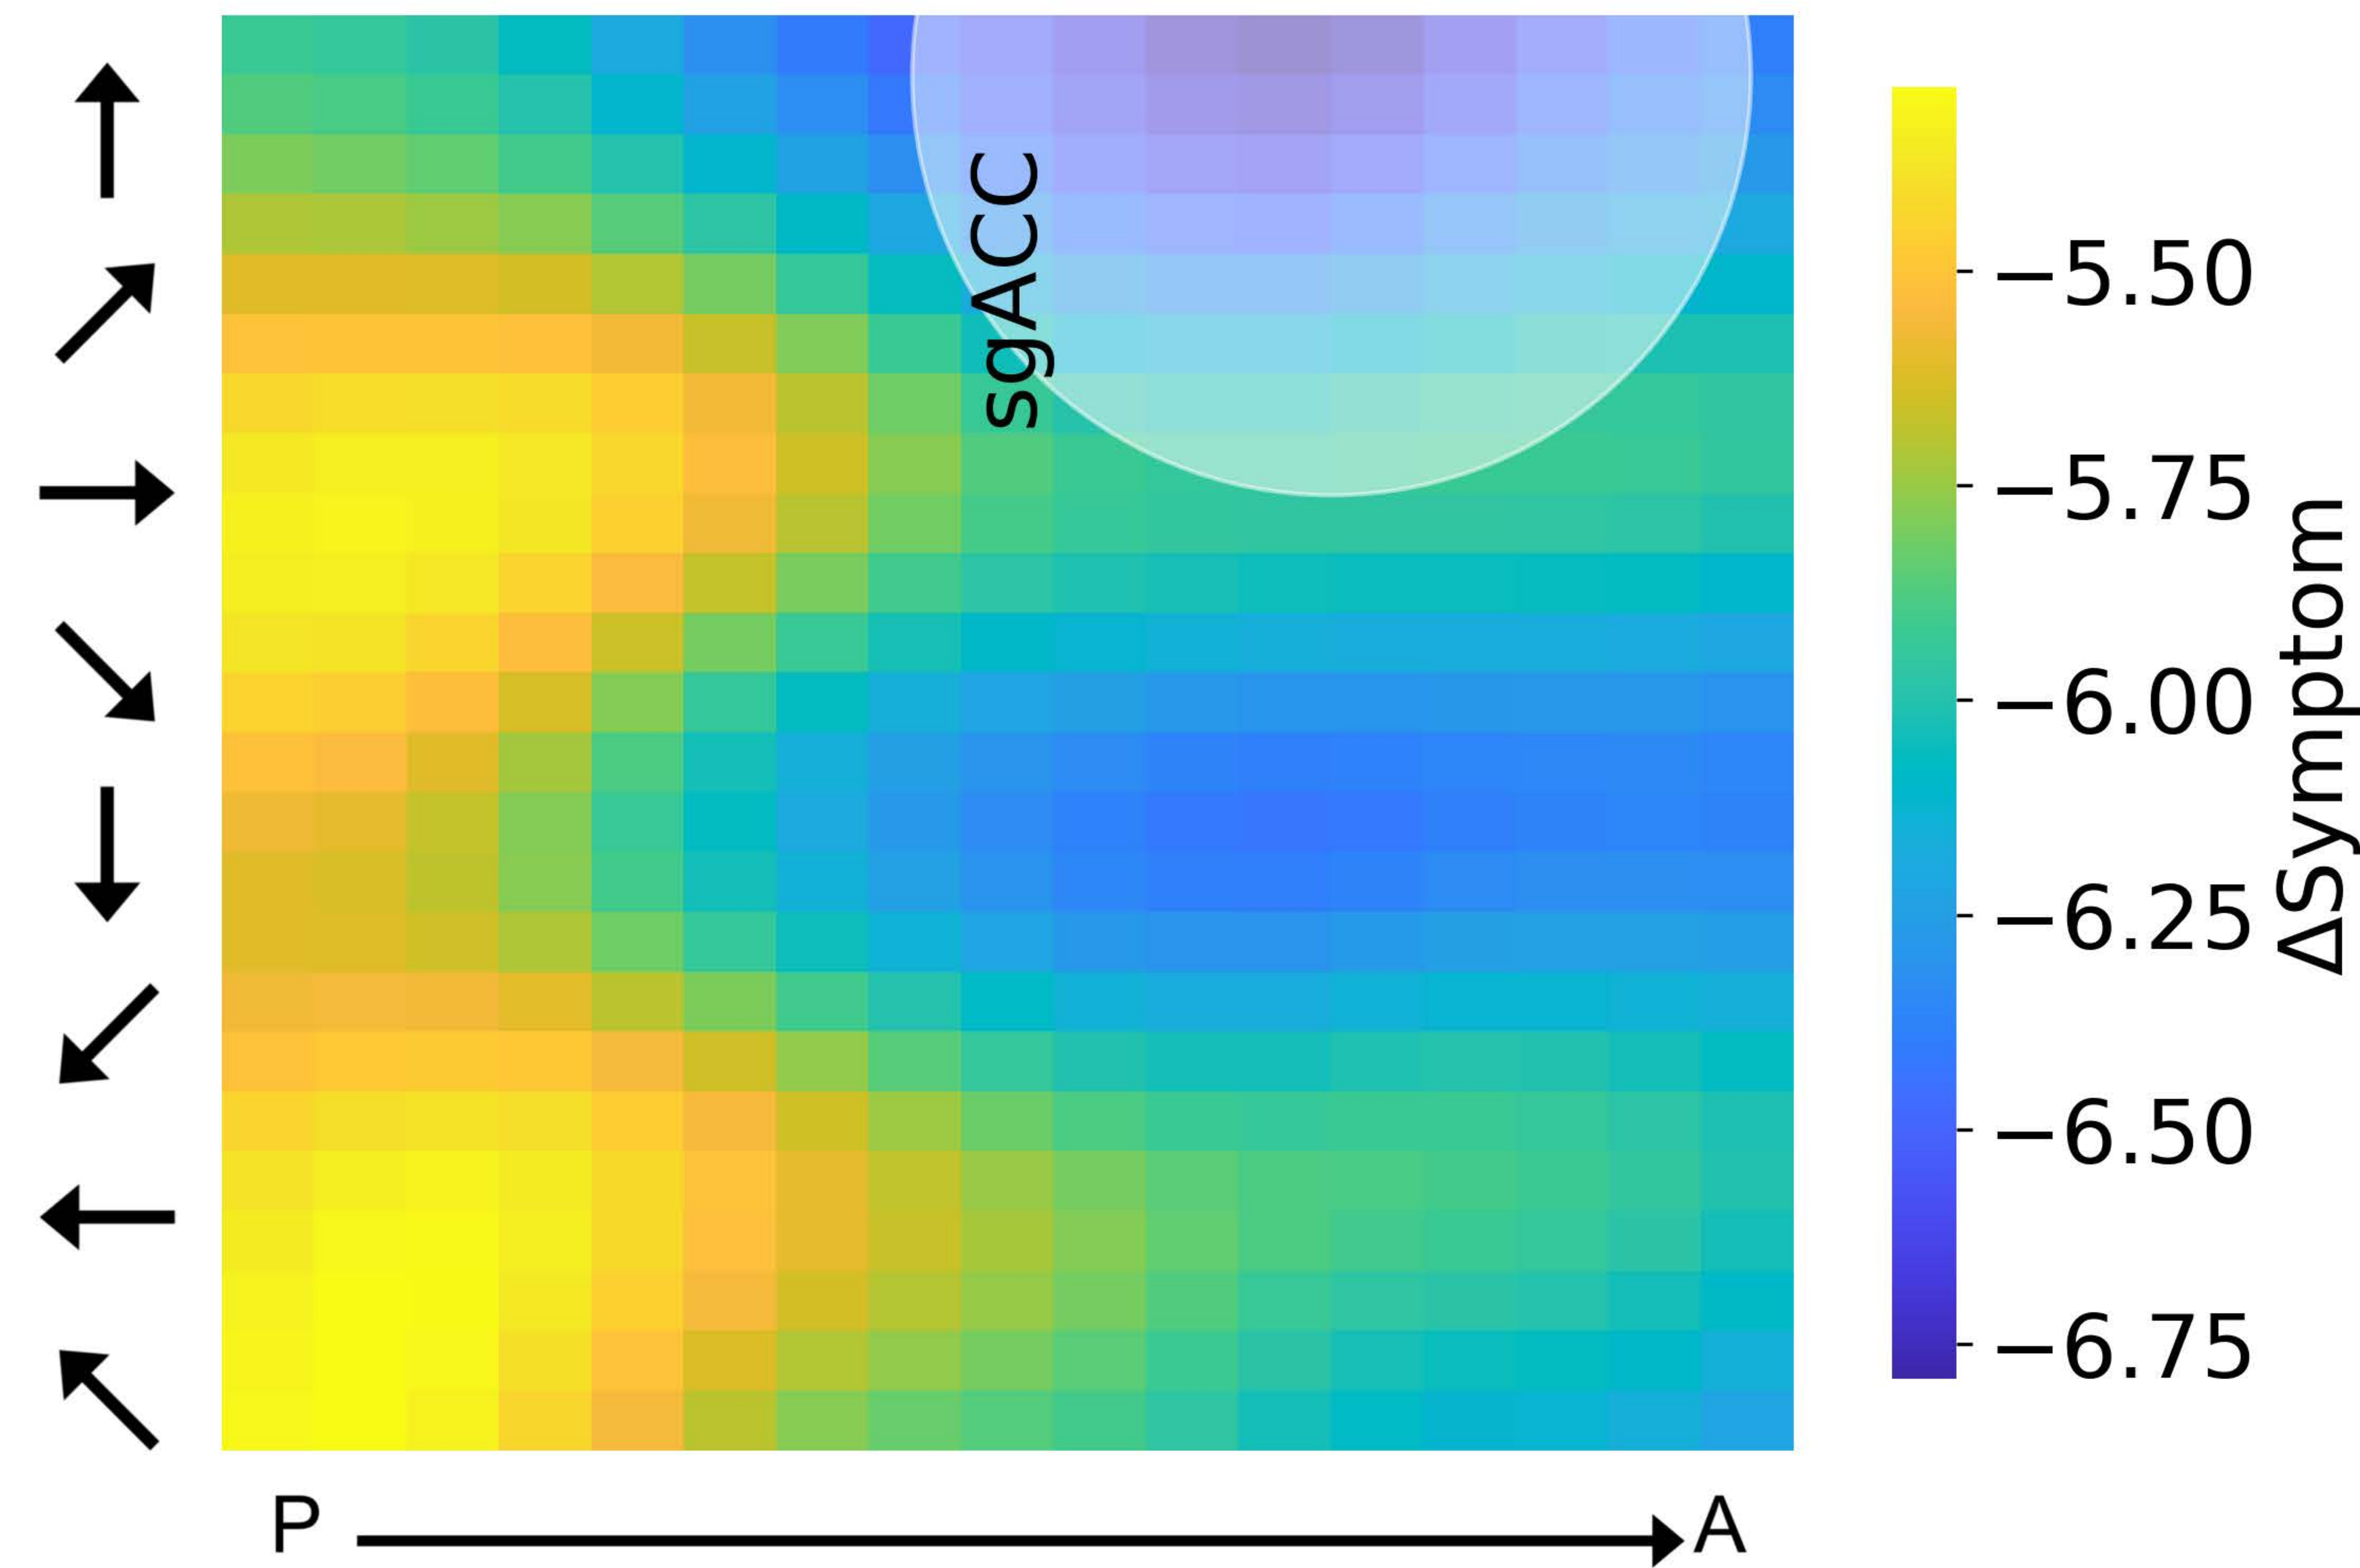



# INDARVE642FAN\_madr\_left\_dlpfc

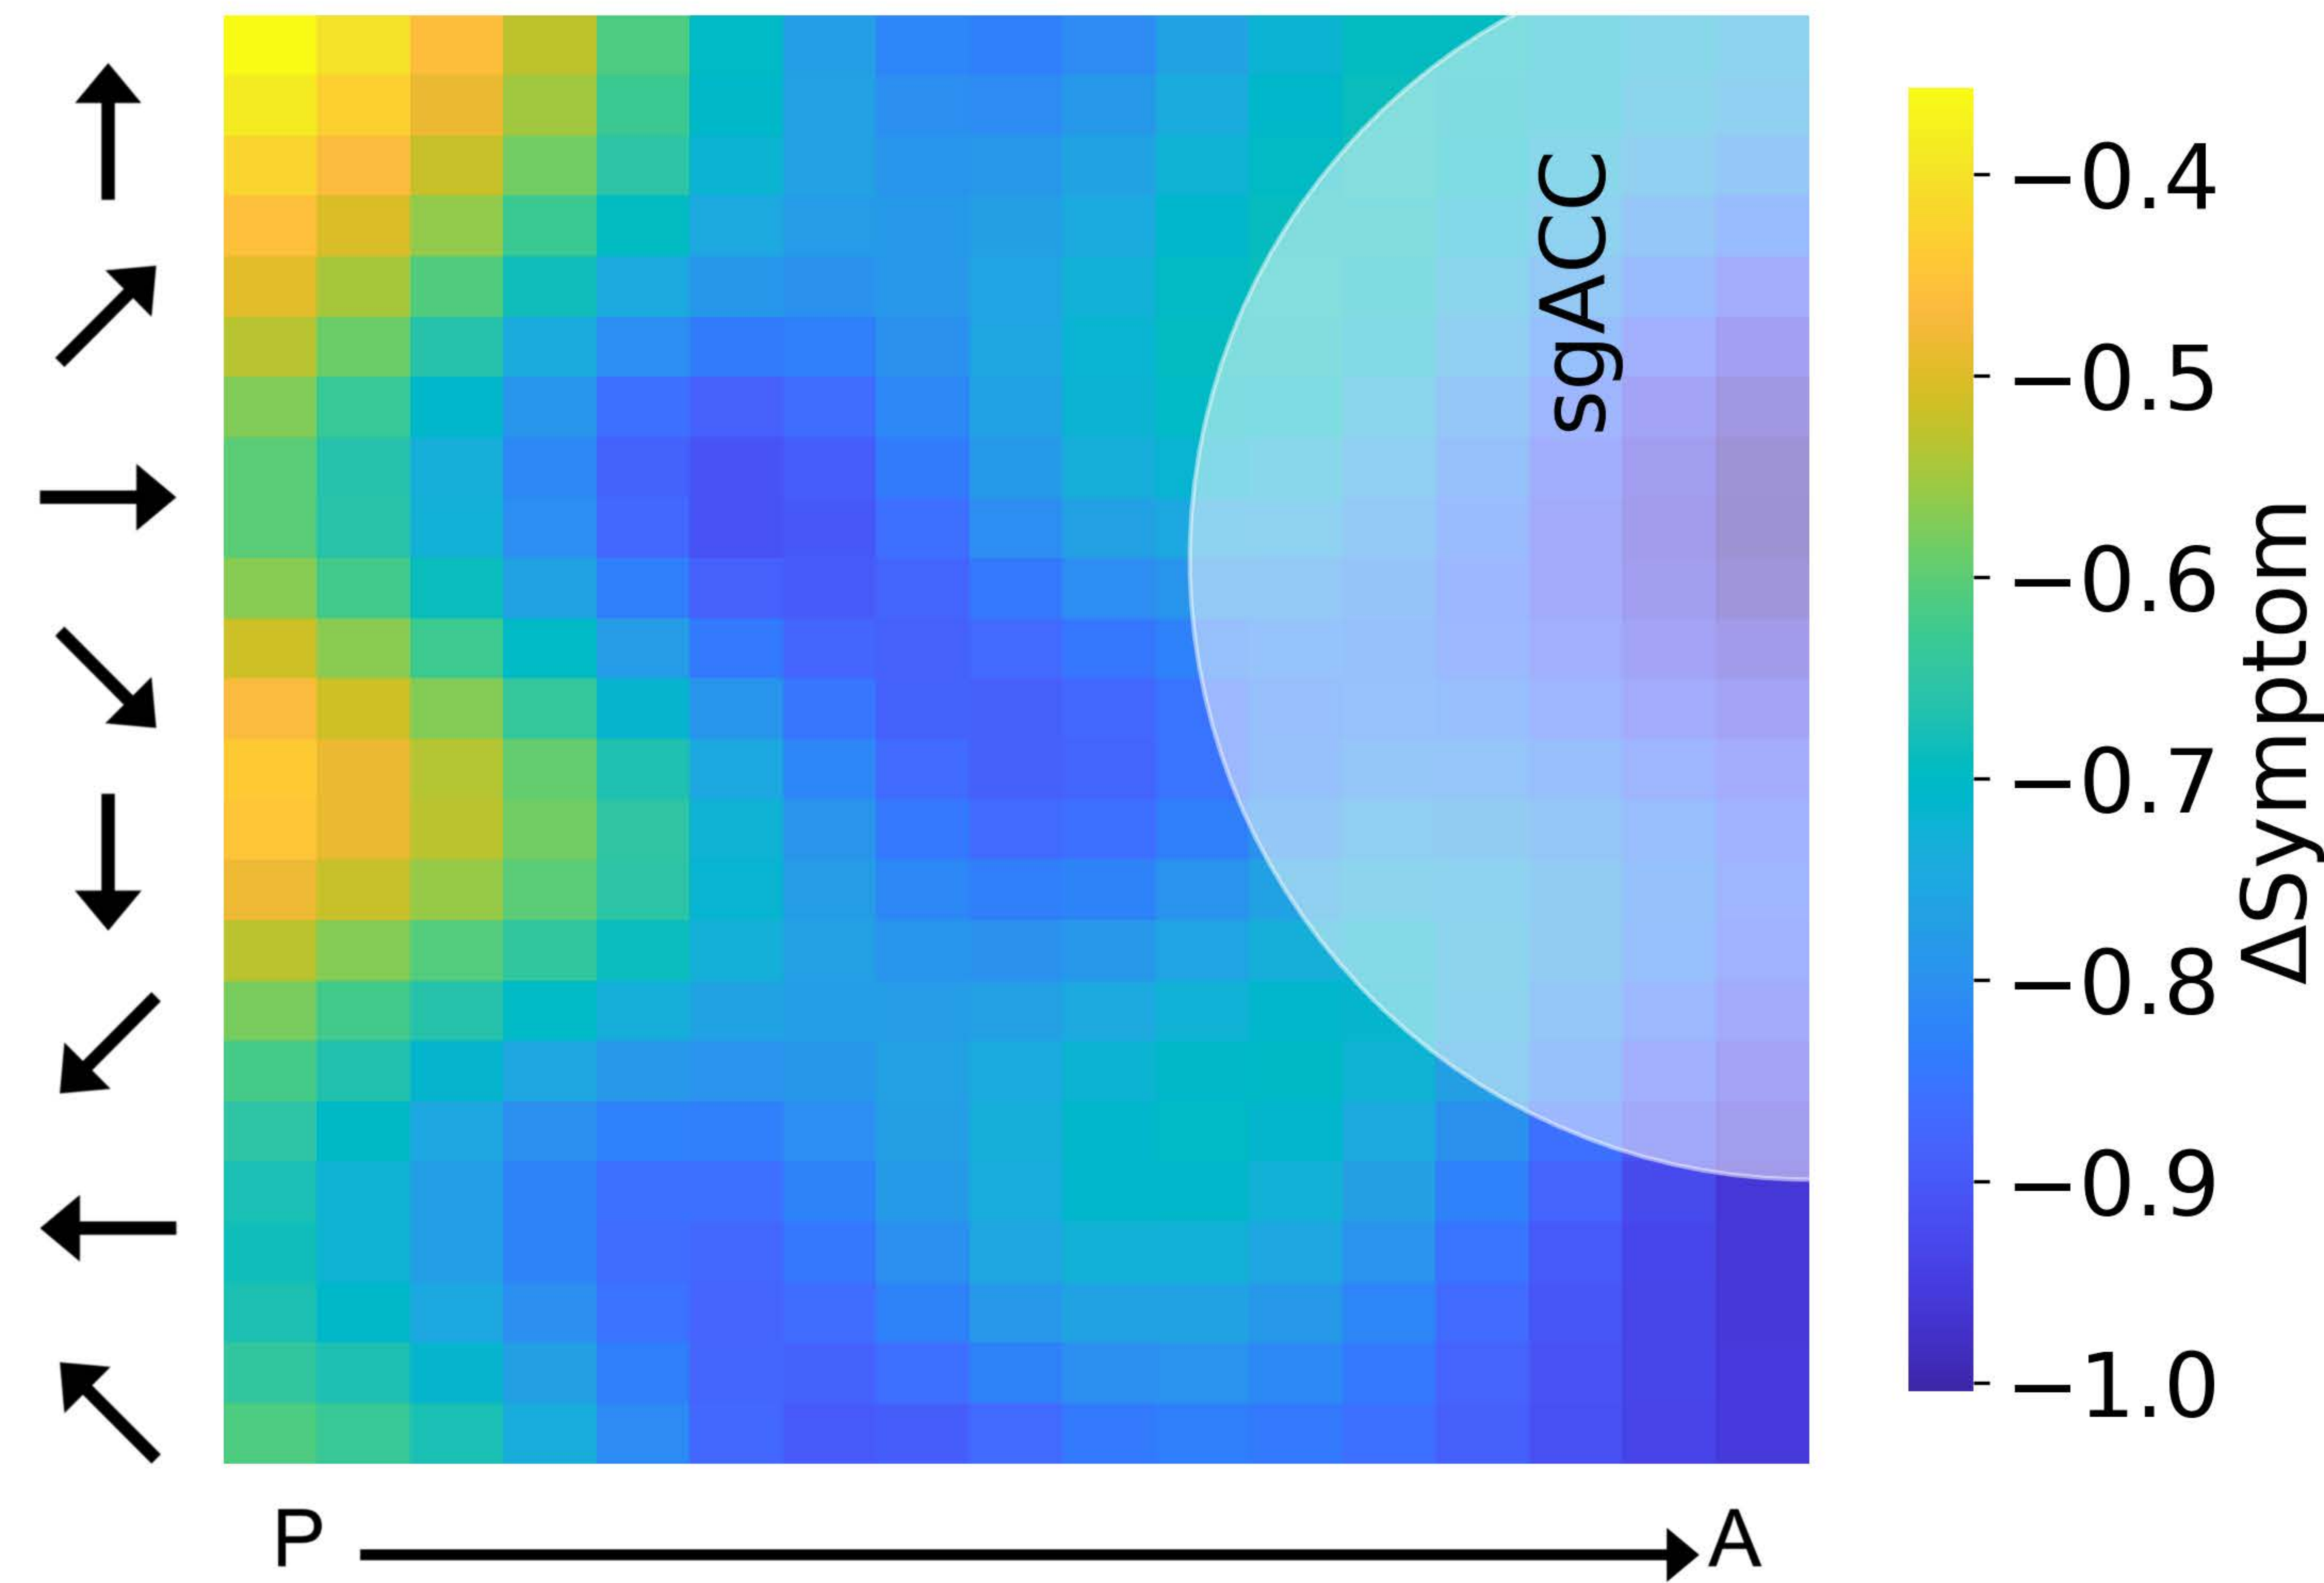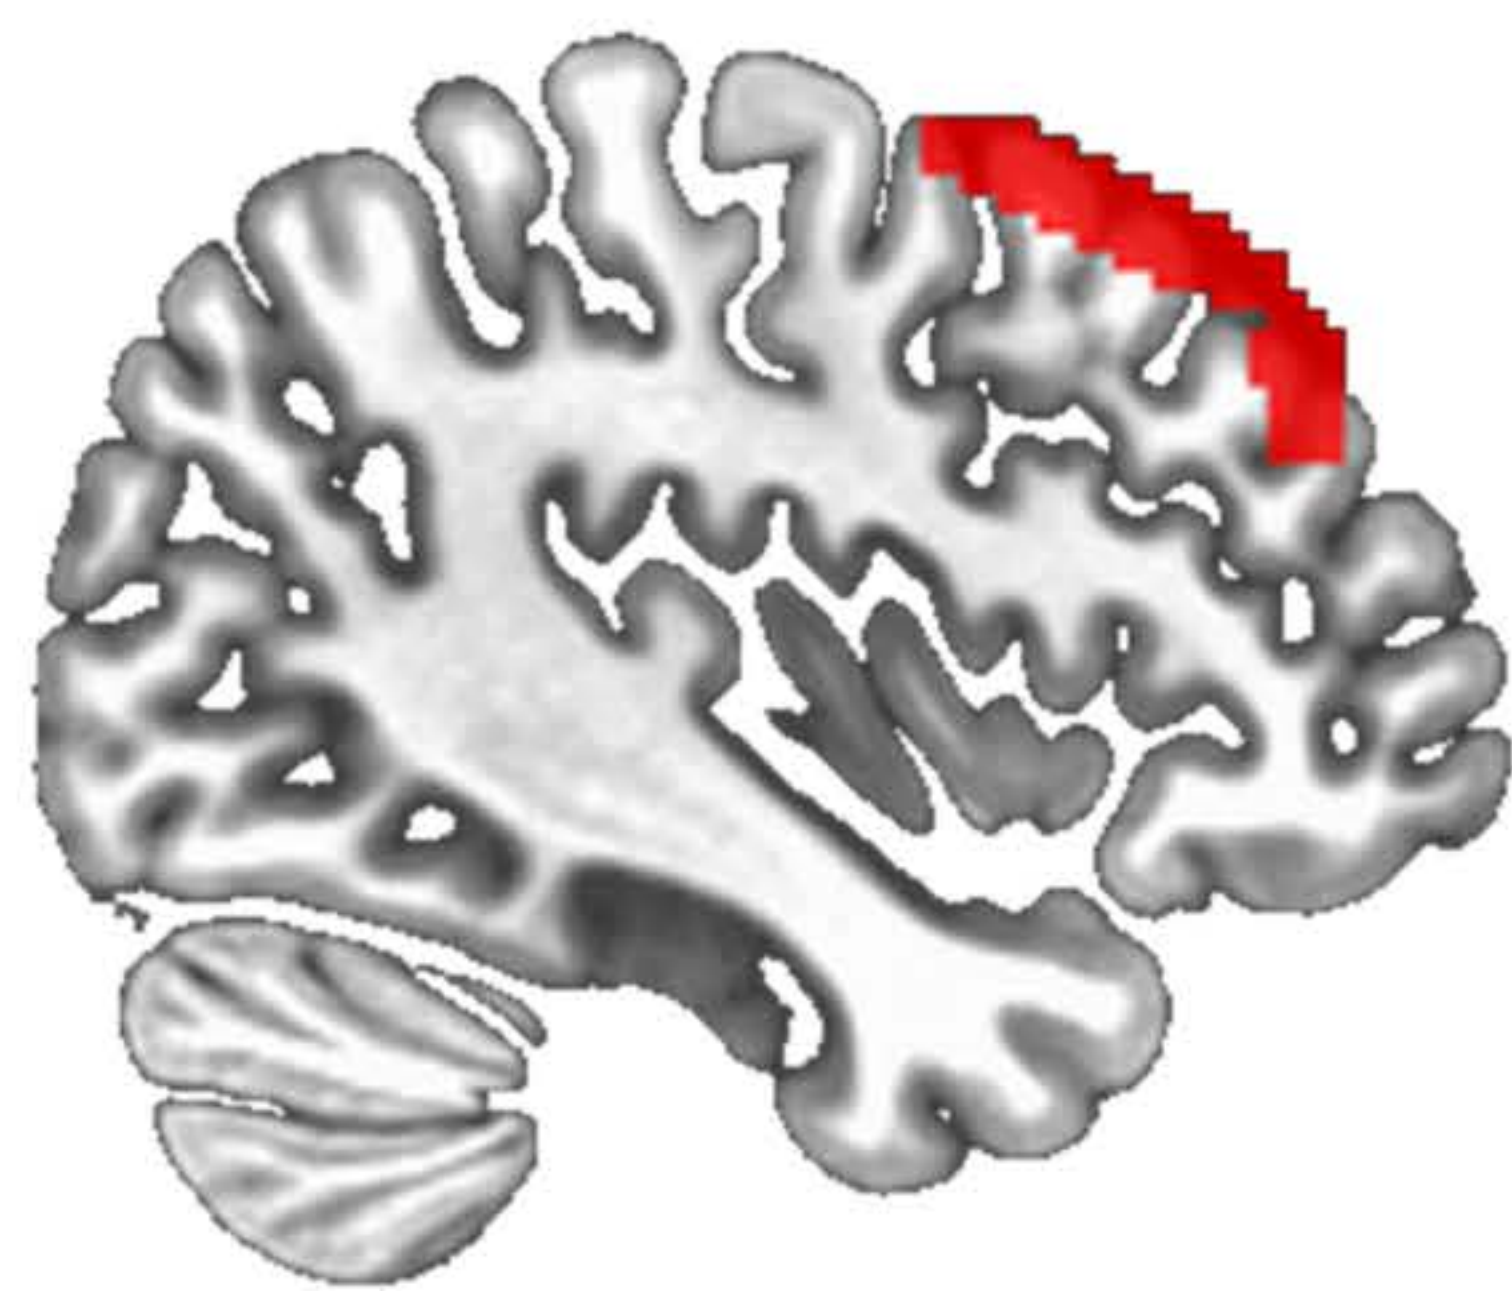



# NDARVL144YVF\_madrs\_left\_dlpfc

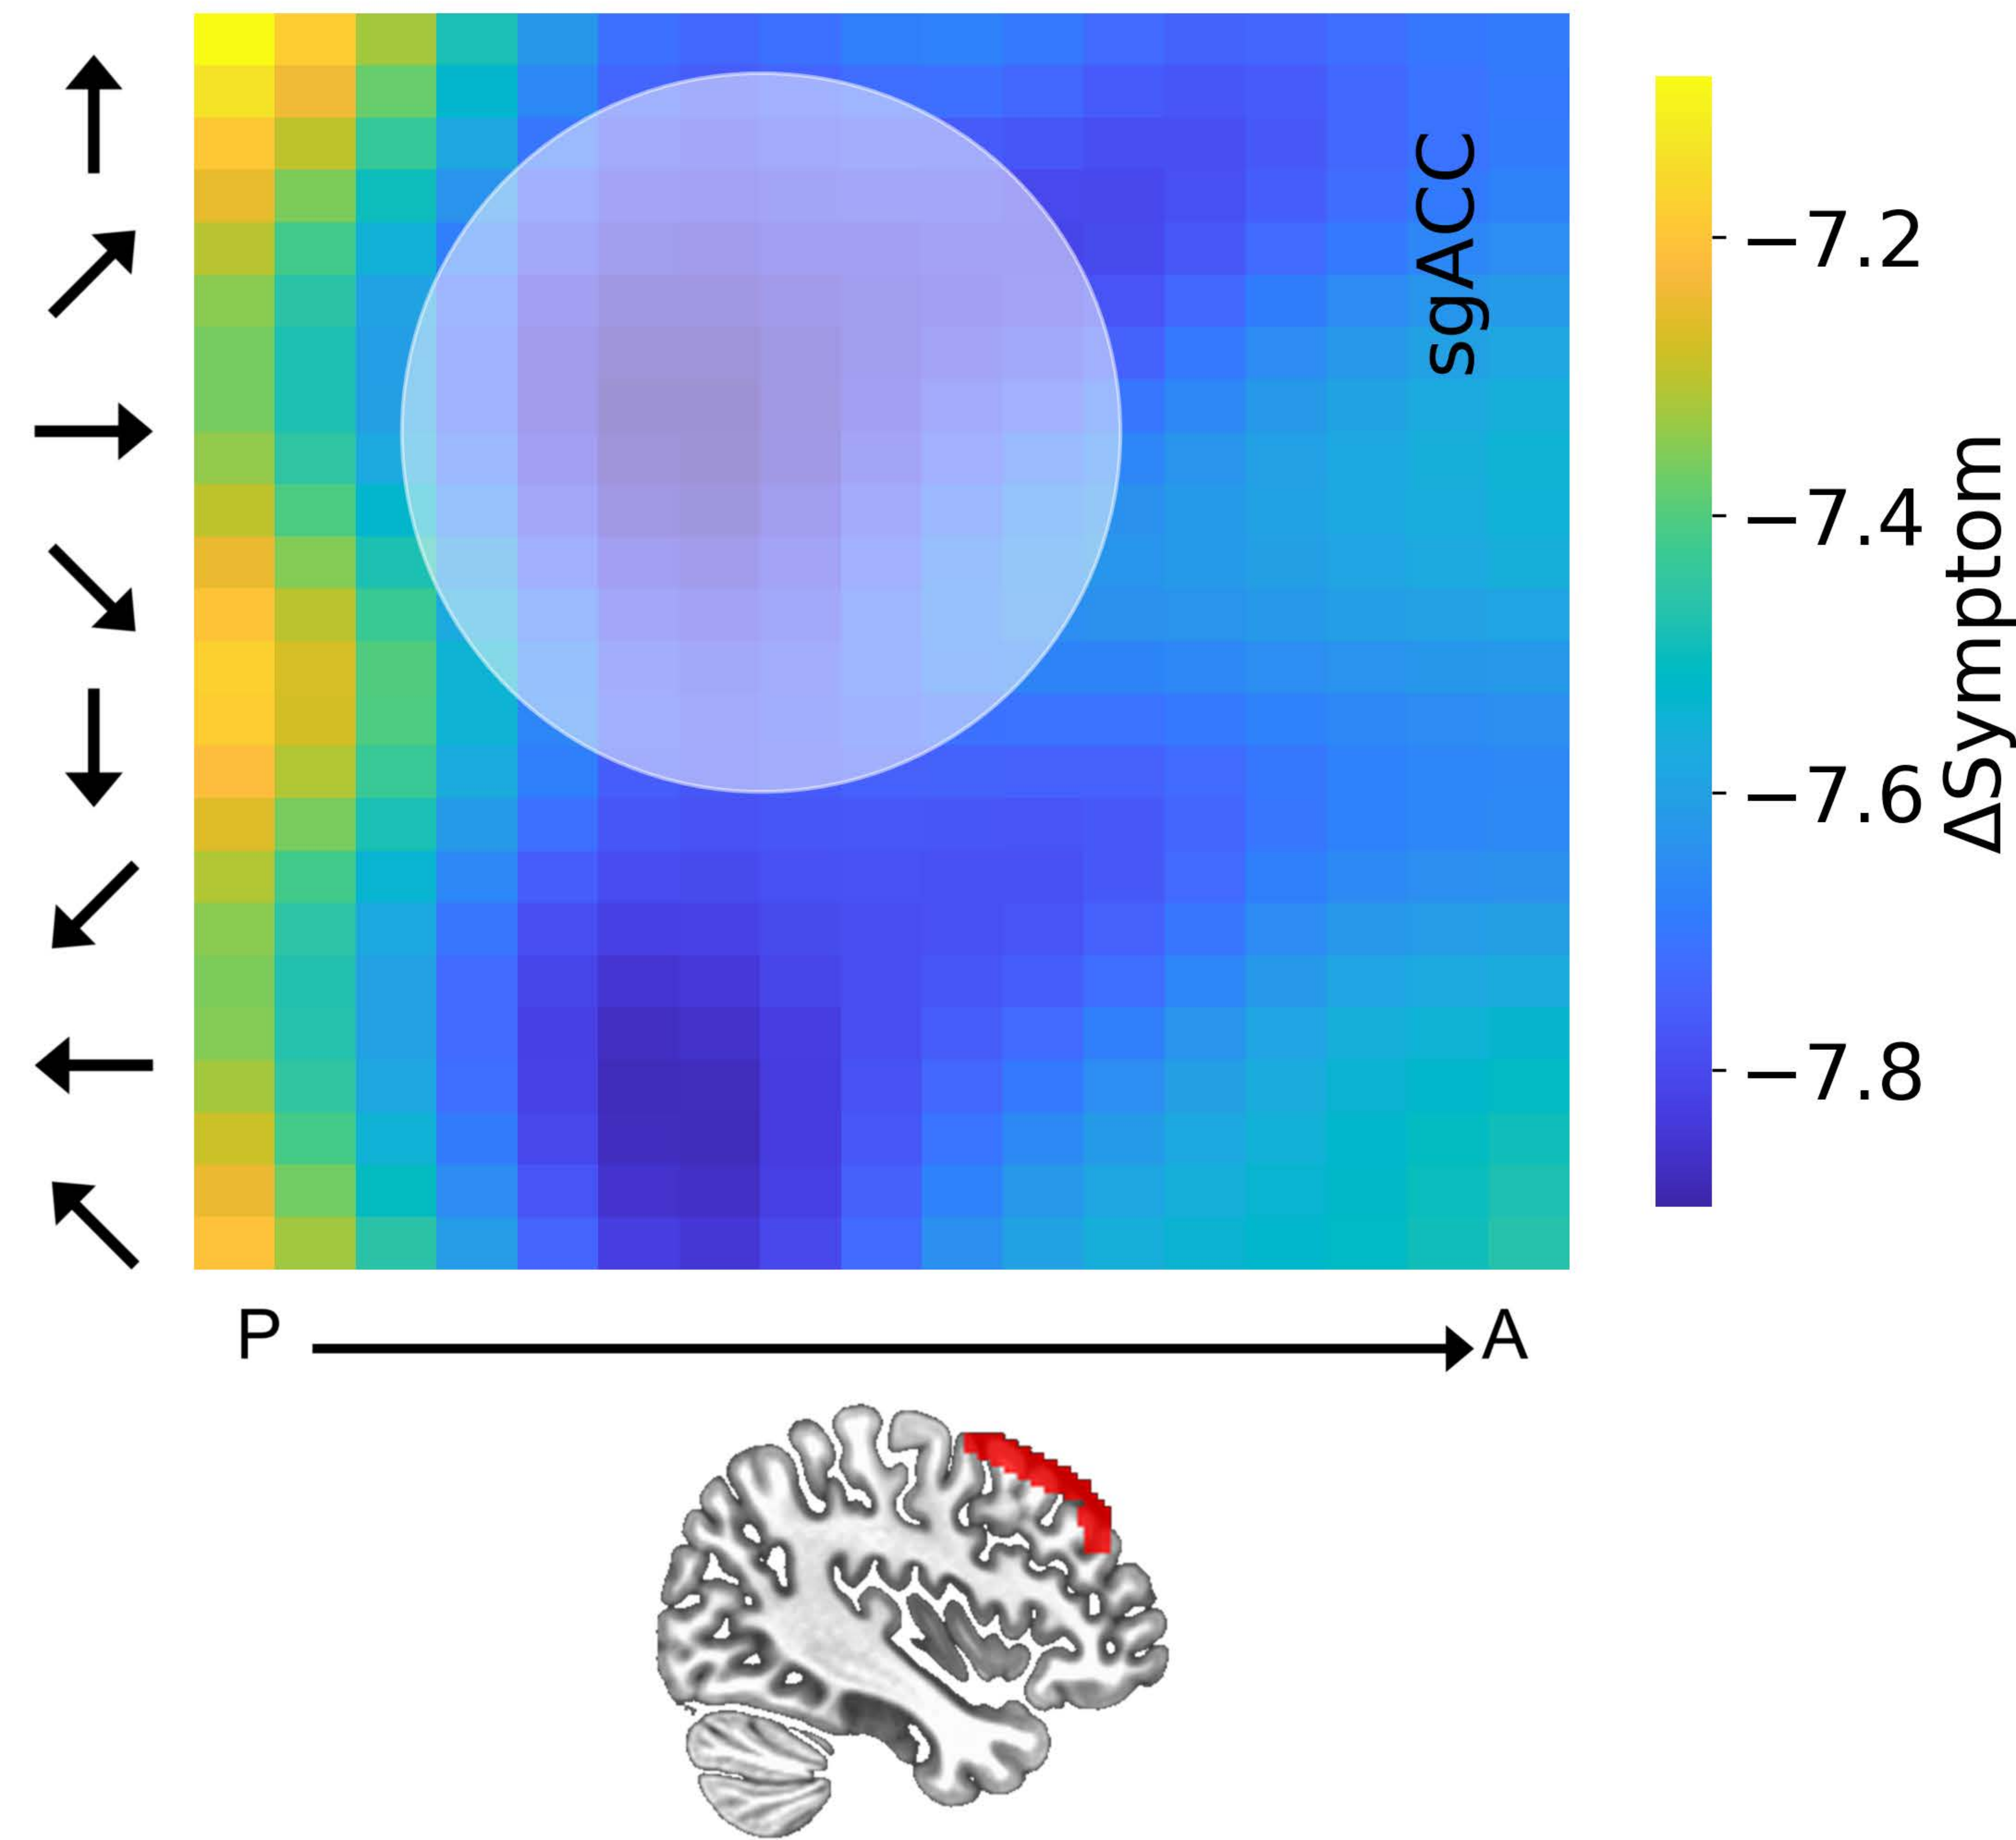



# INDARWH523DTV\_madrs\_left\_dlpfc

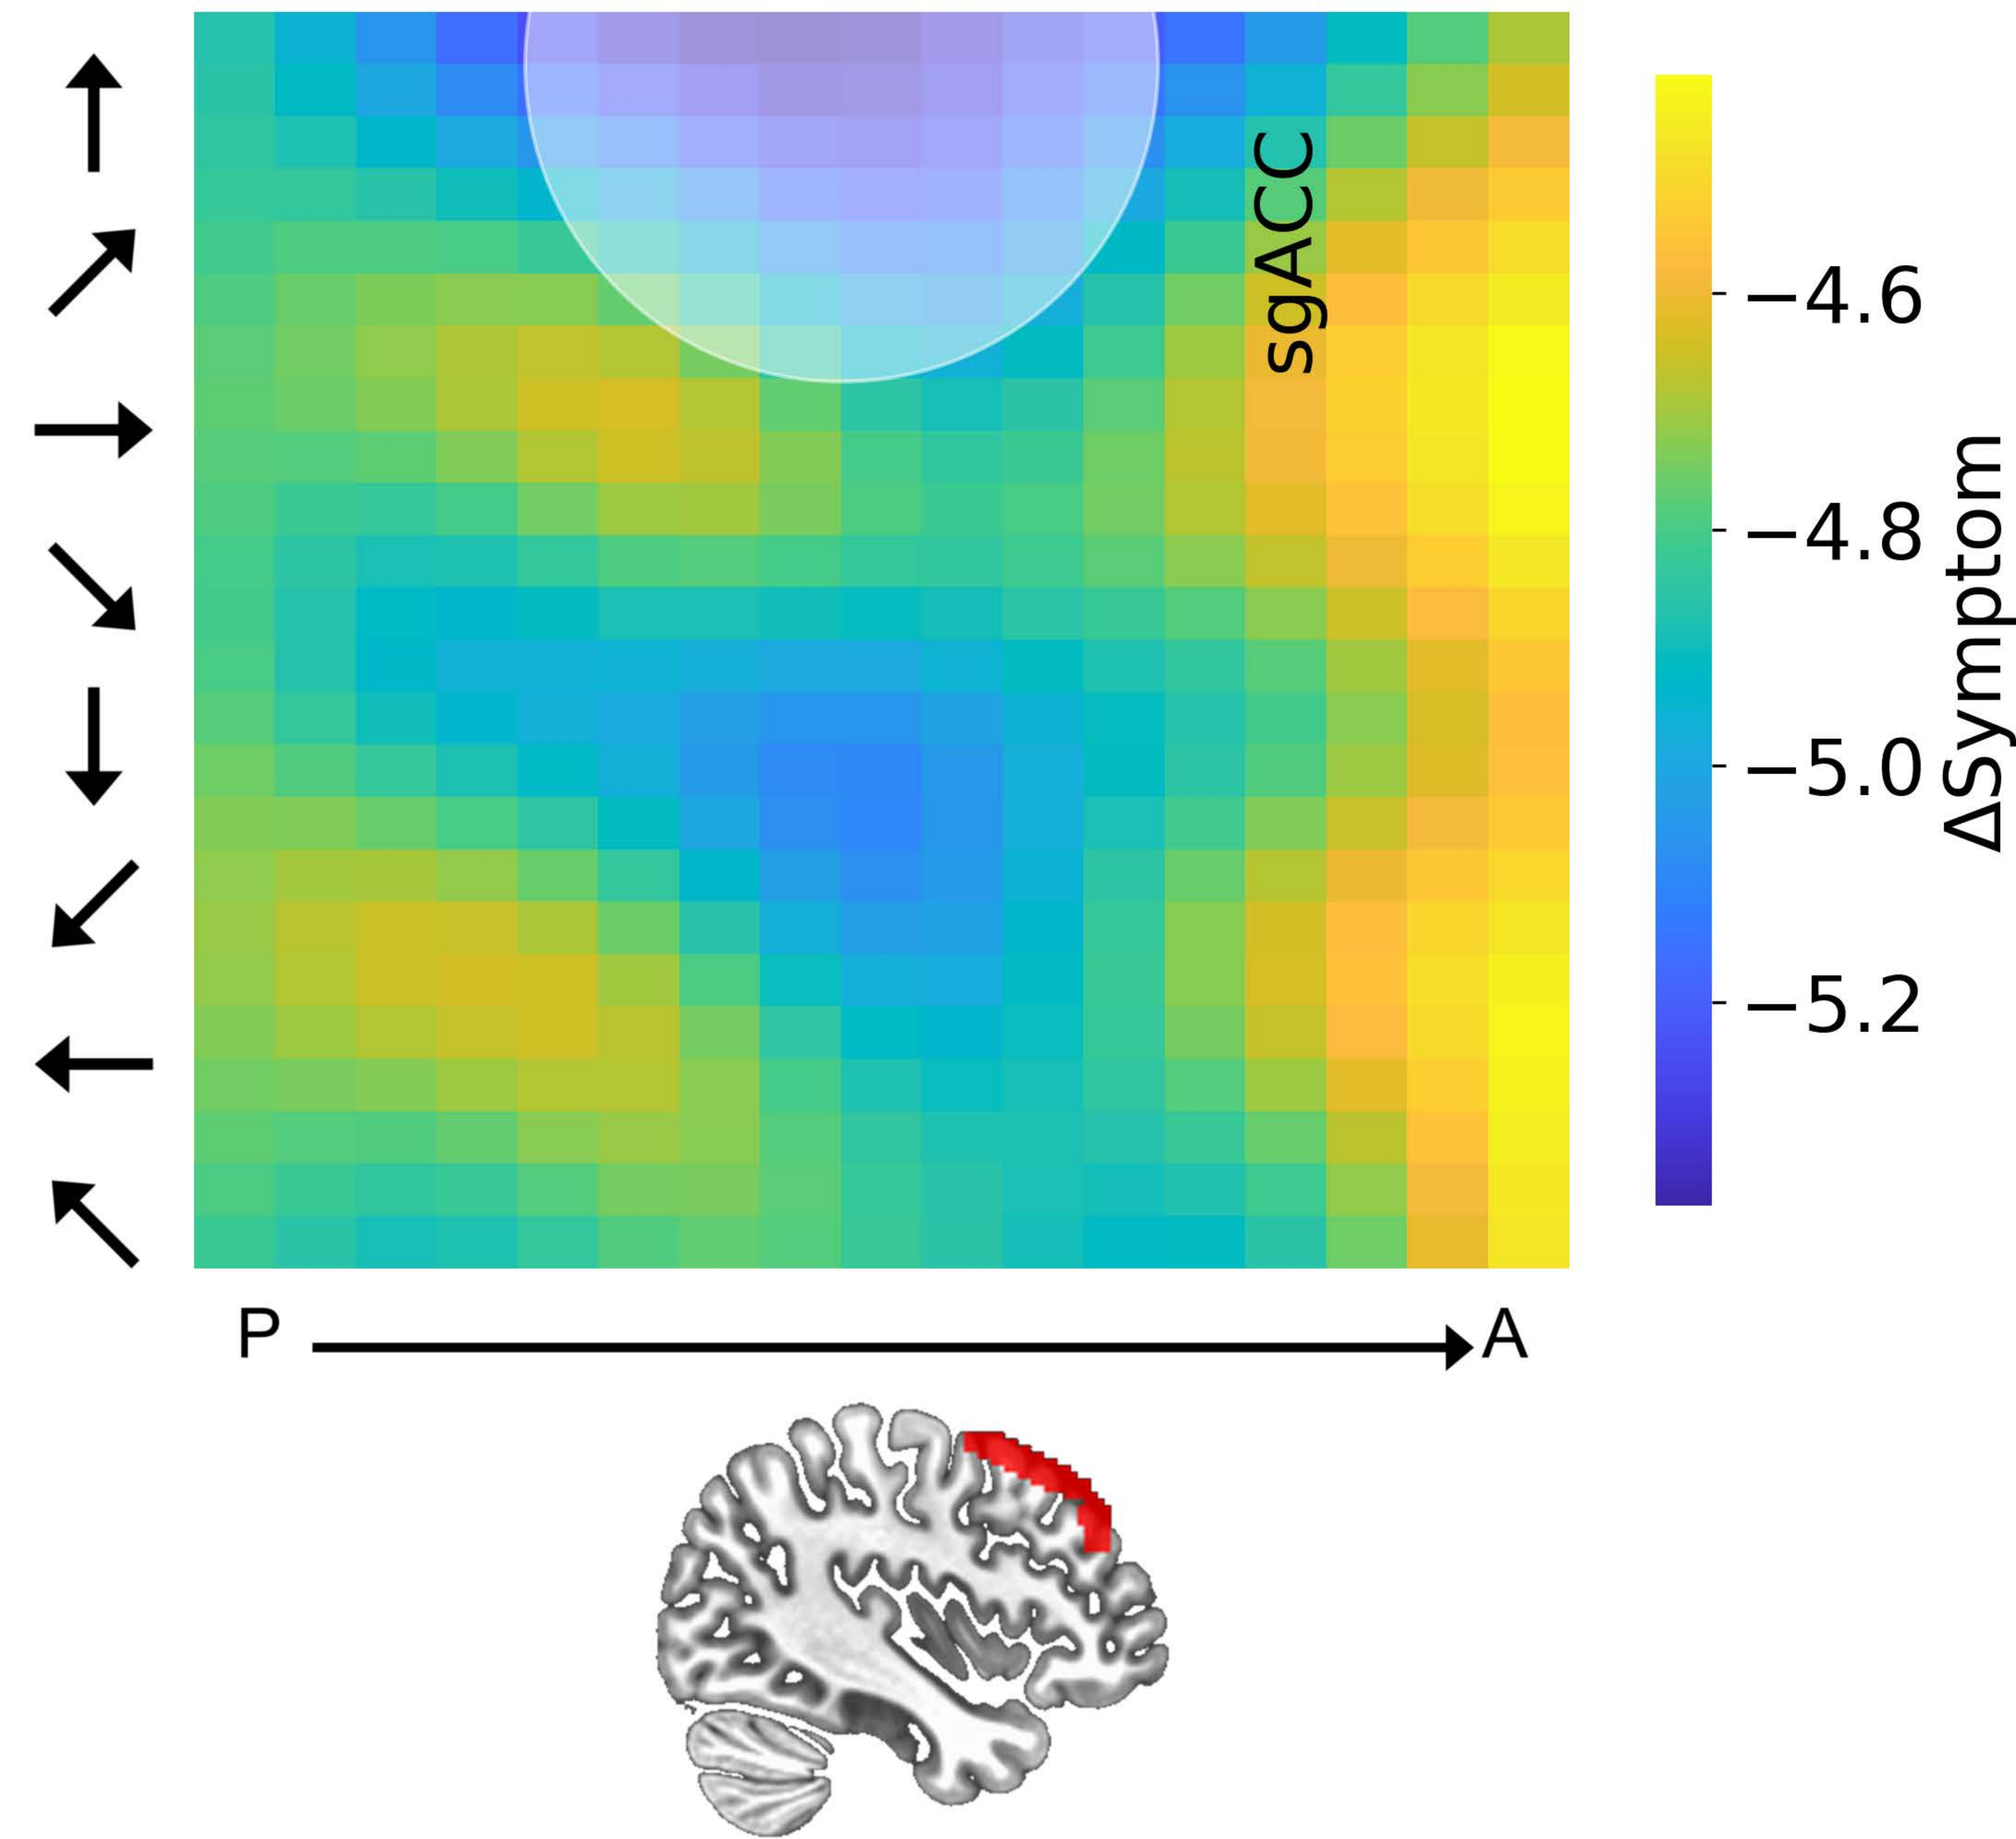



# NDARWJ818VXA\_madrs\_left\_dlpfc

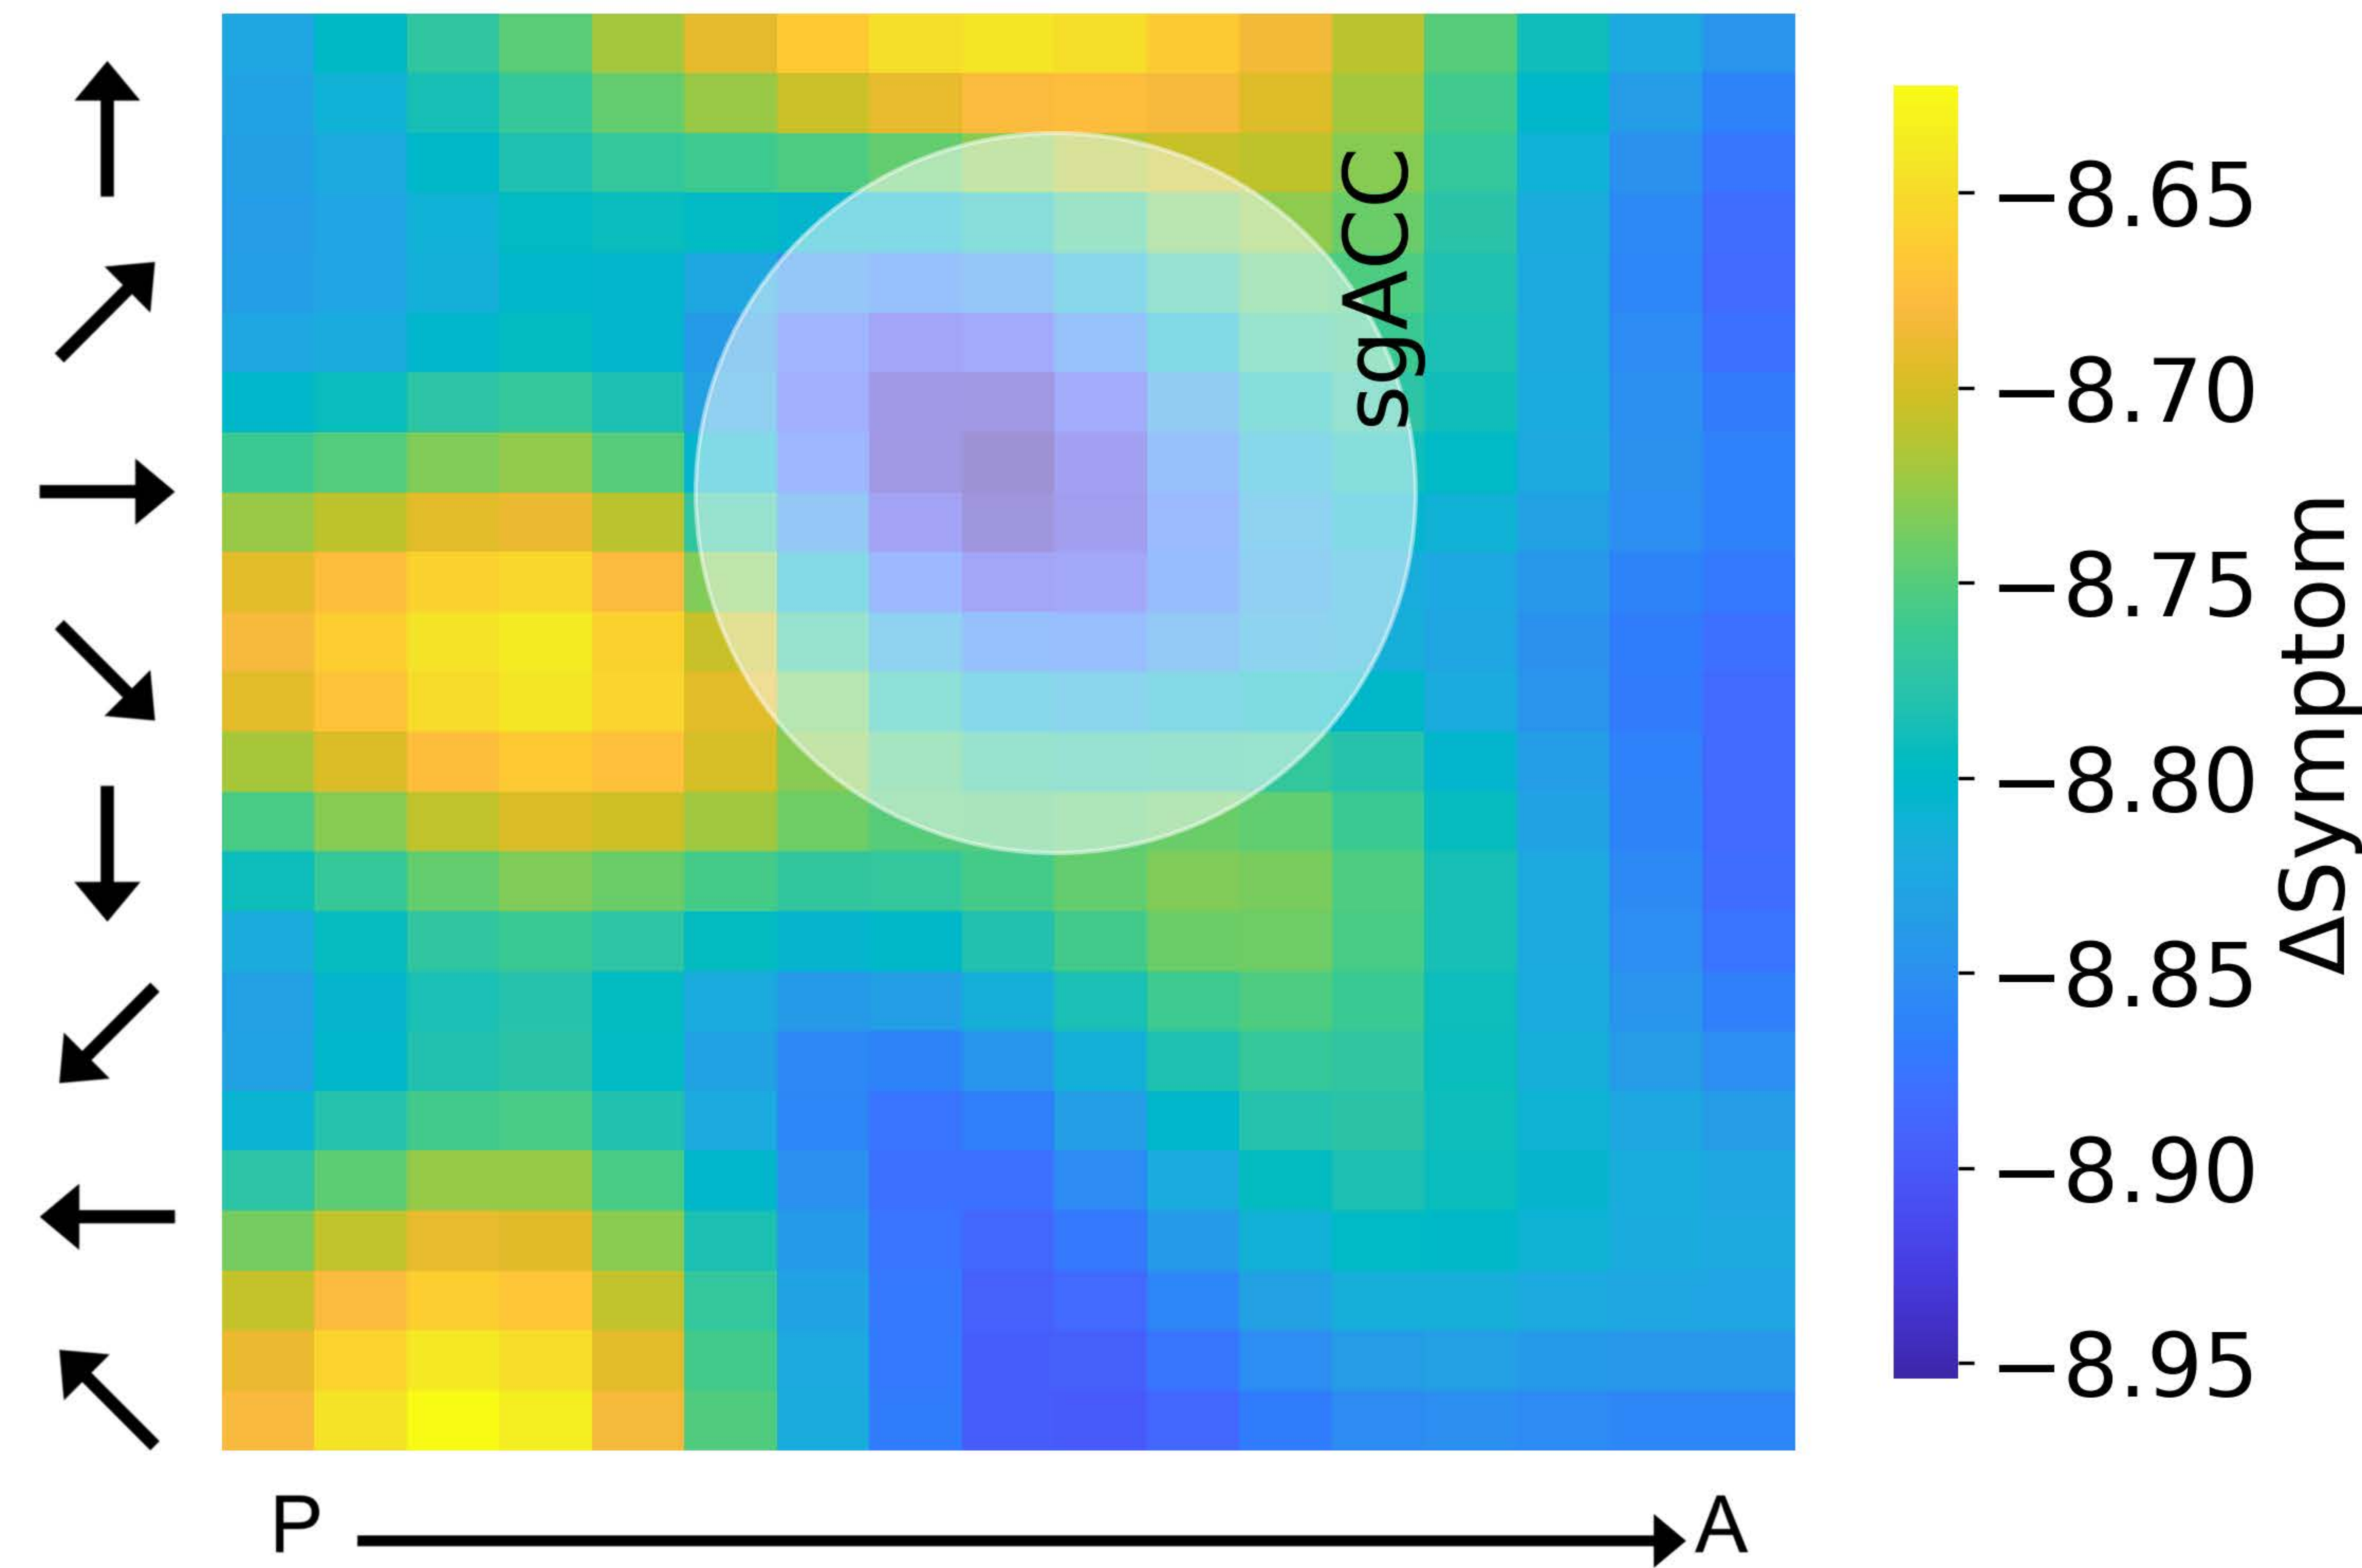



# INDARWK081NTV\_madrs\_left\_dlpfc

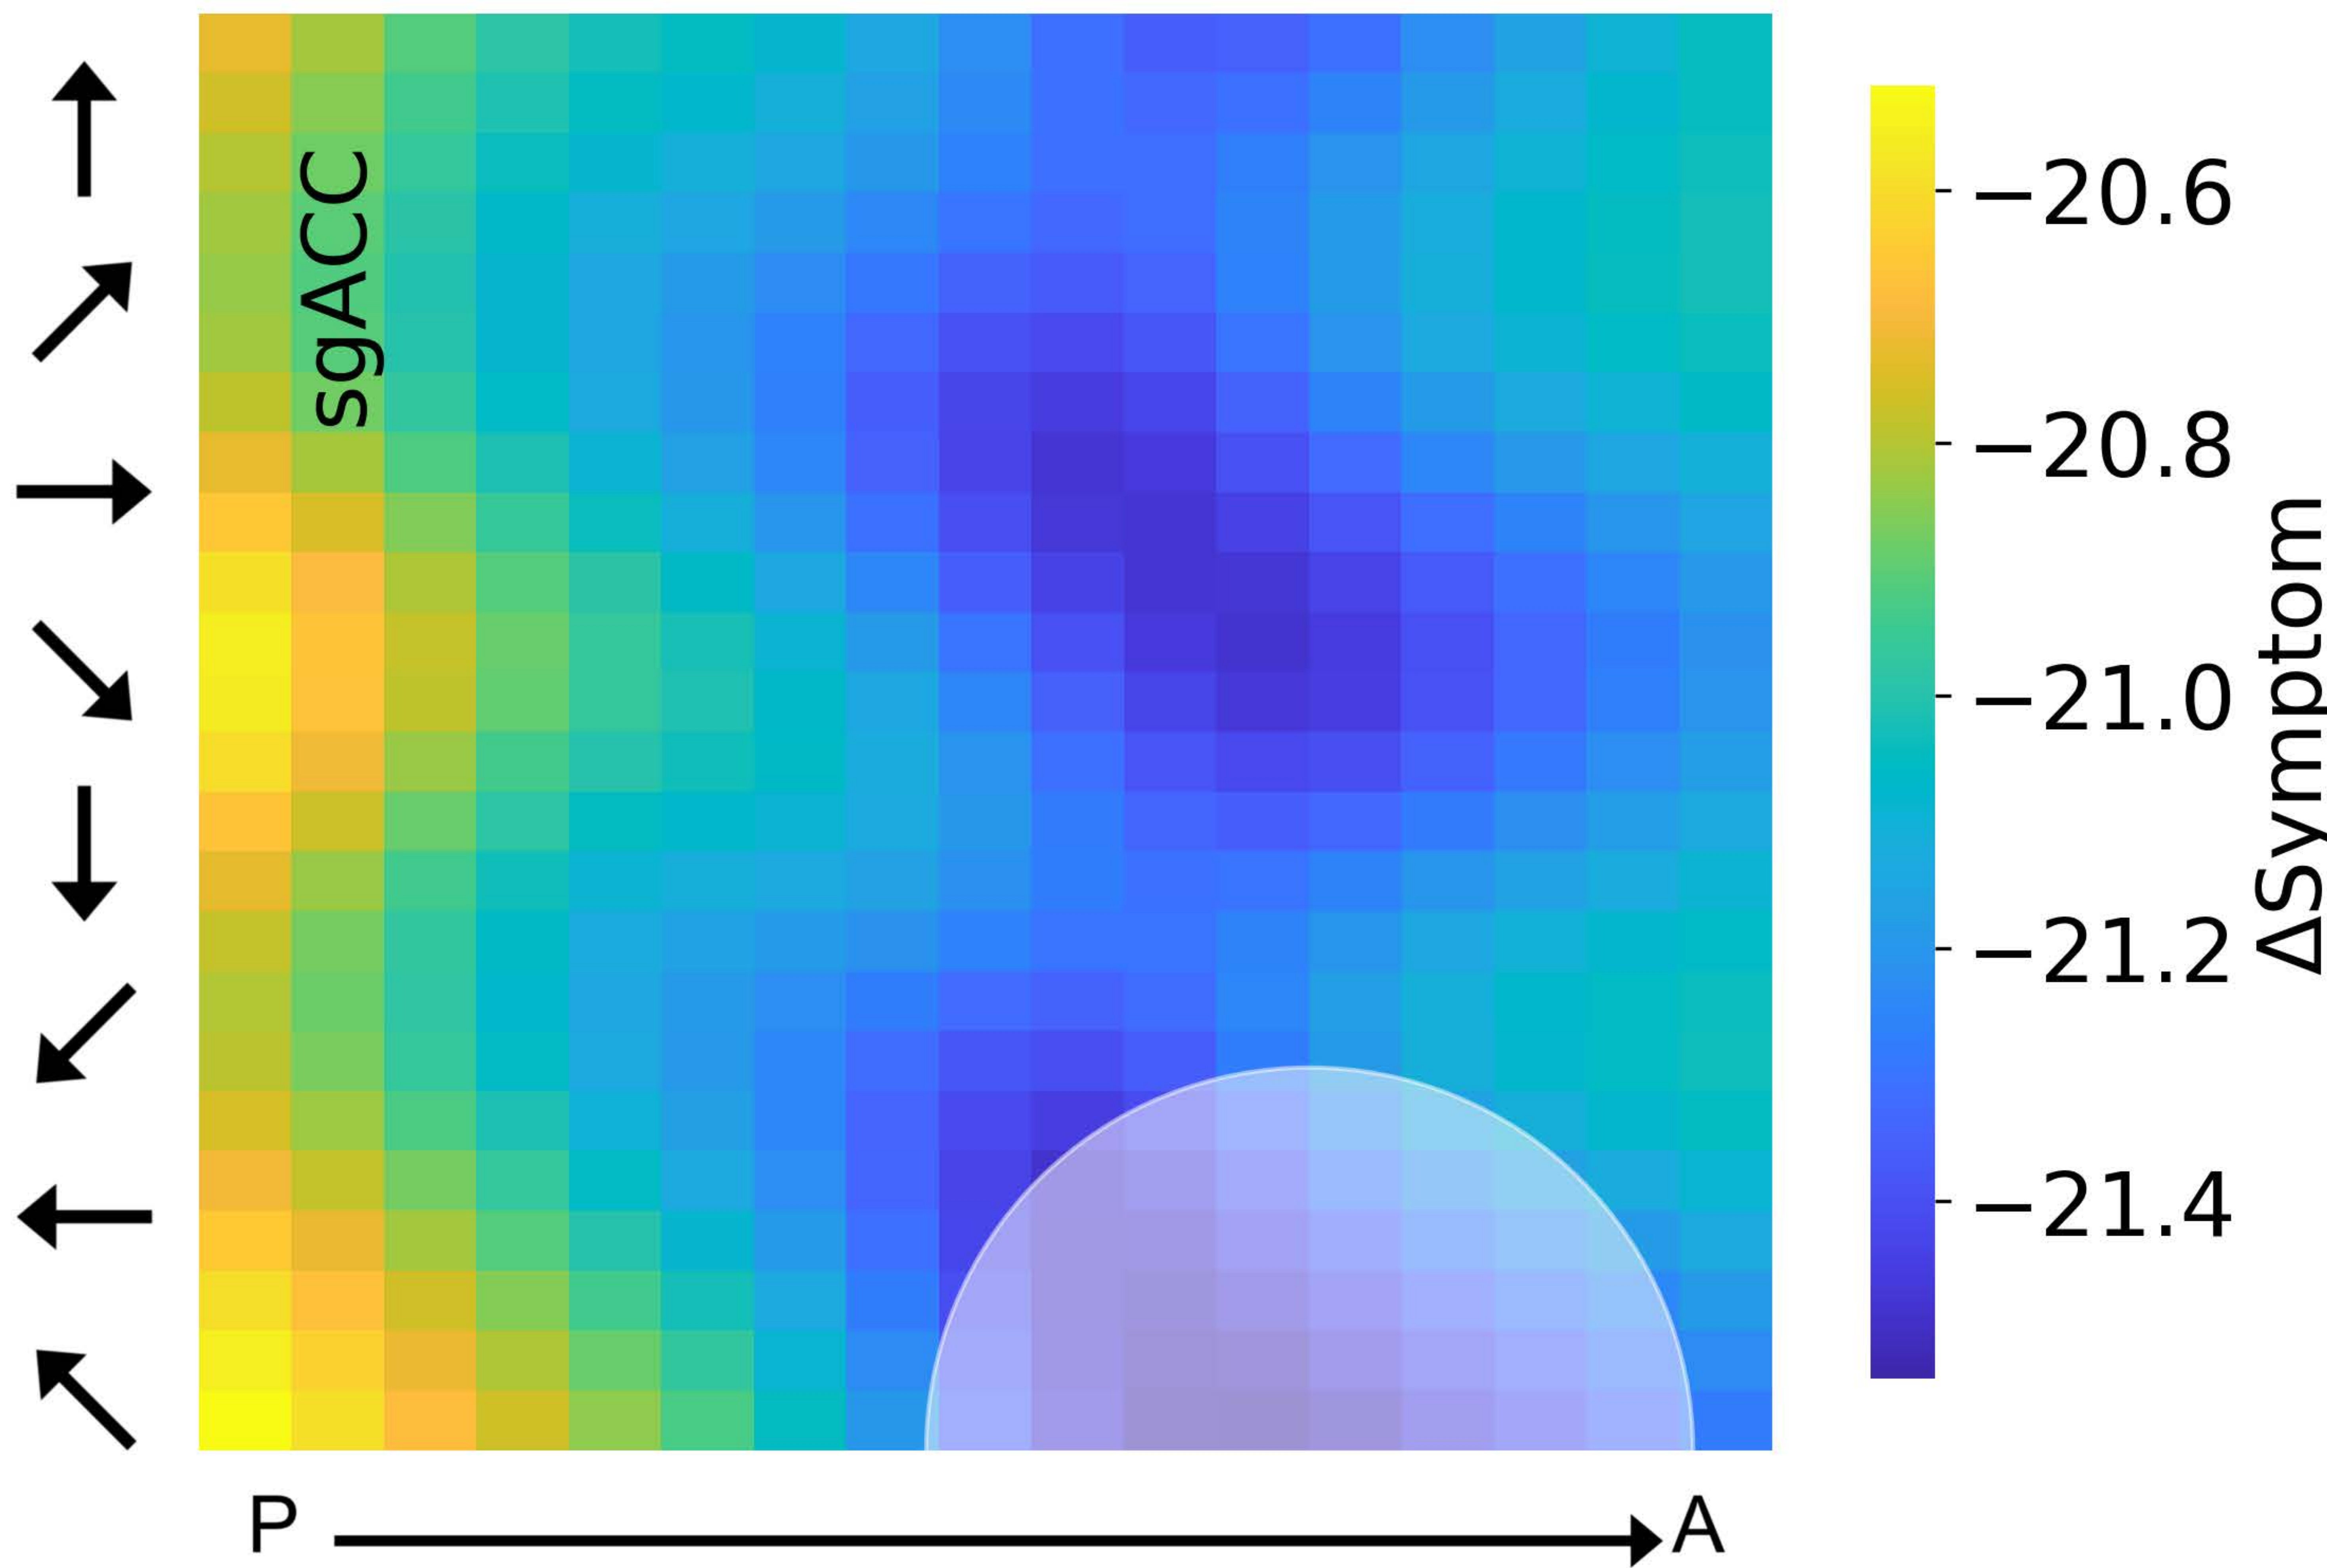



# INDARWL277NXF\_madrs\_left\_dlpfc

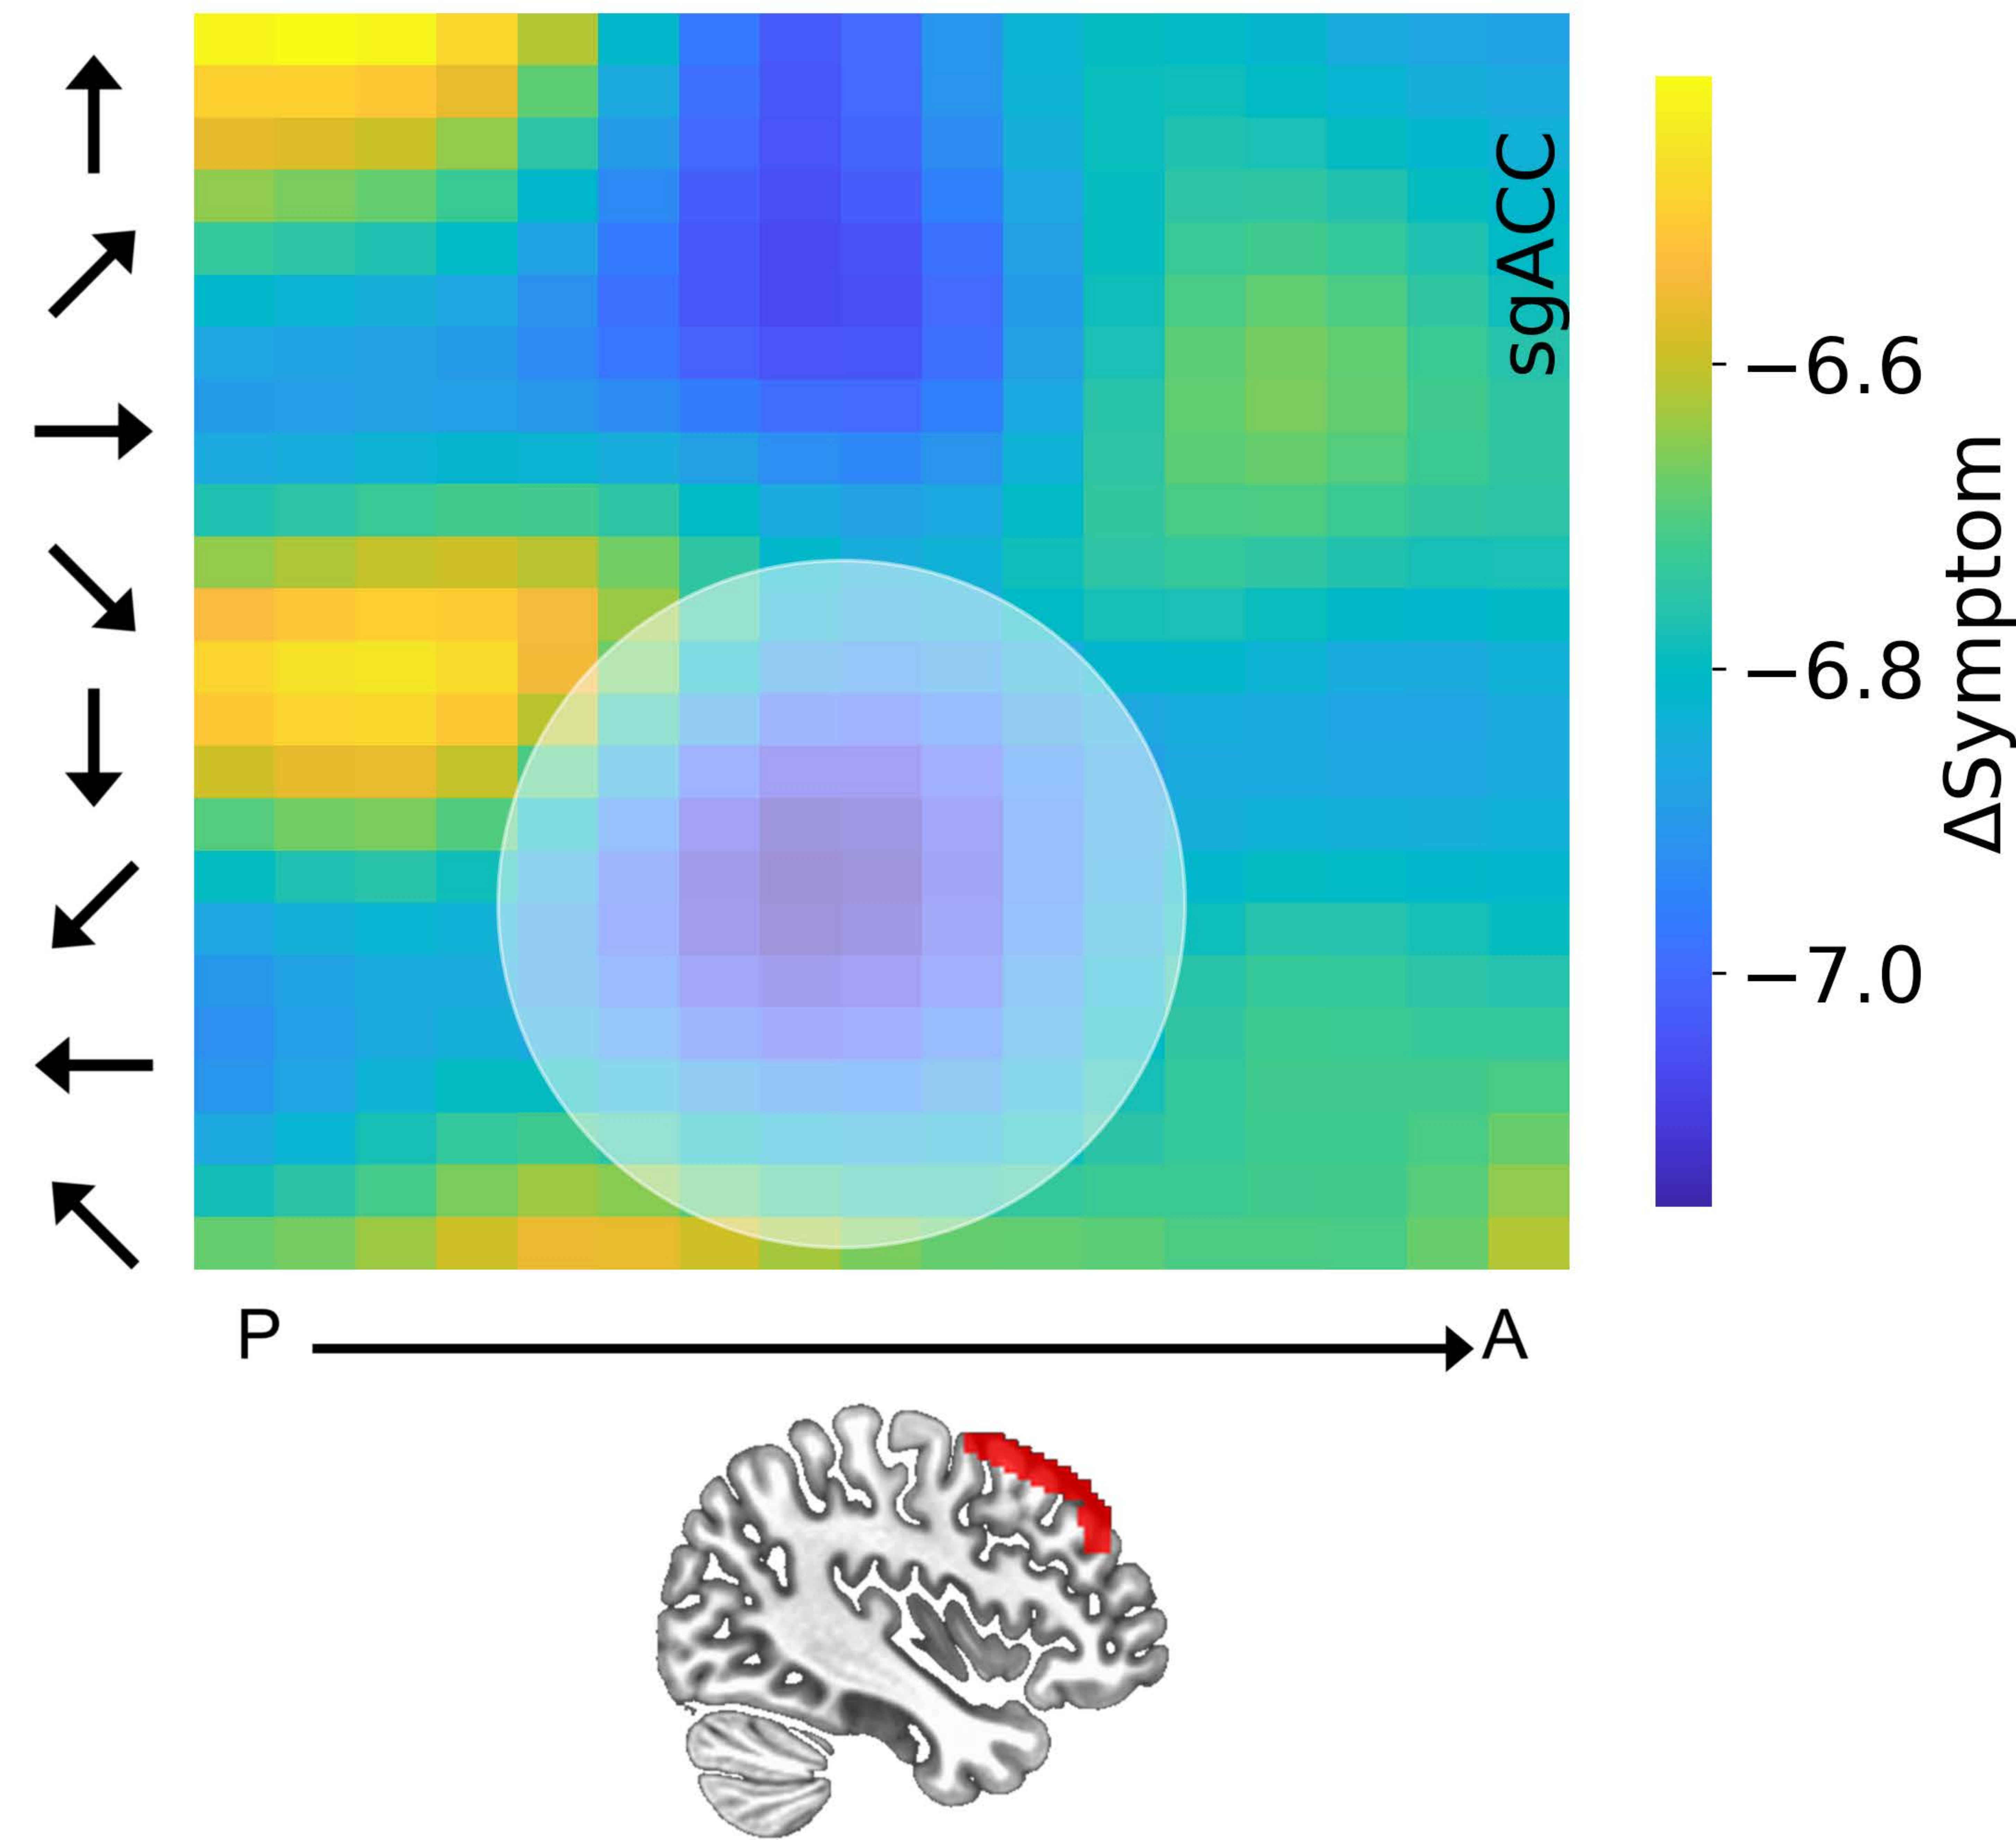



# INDARWV016ZAT\_madrs\_left\_dlpfc

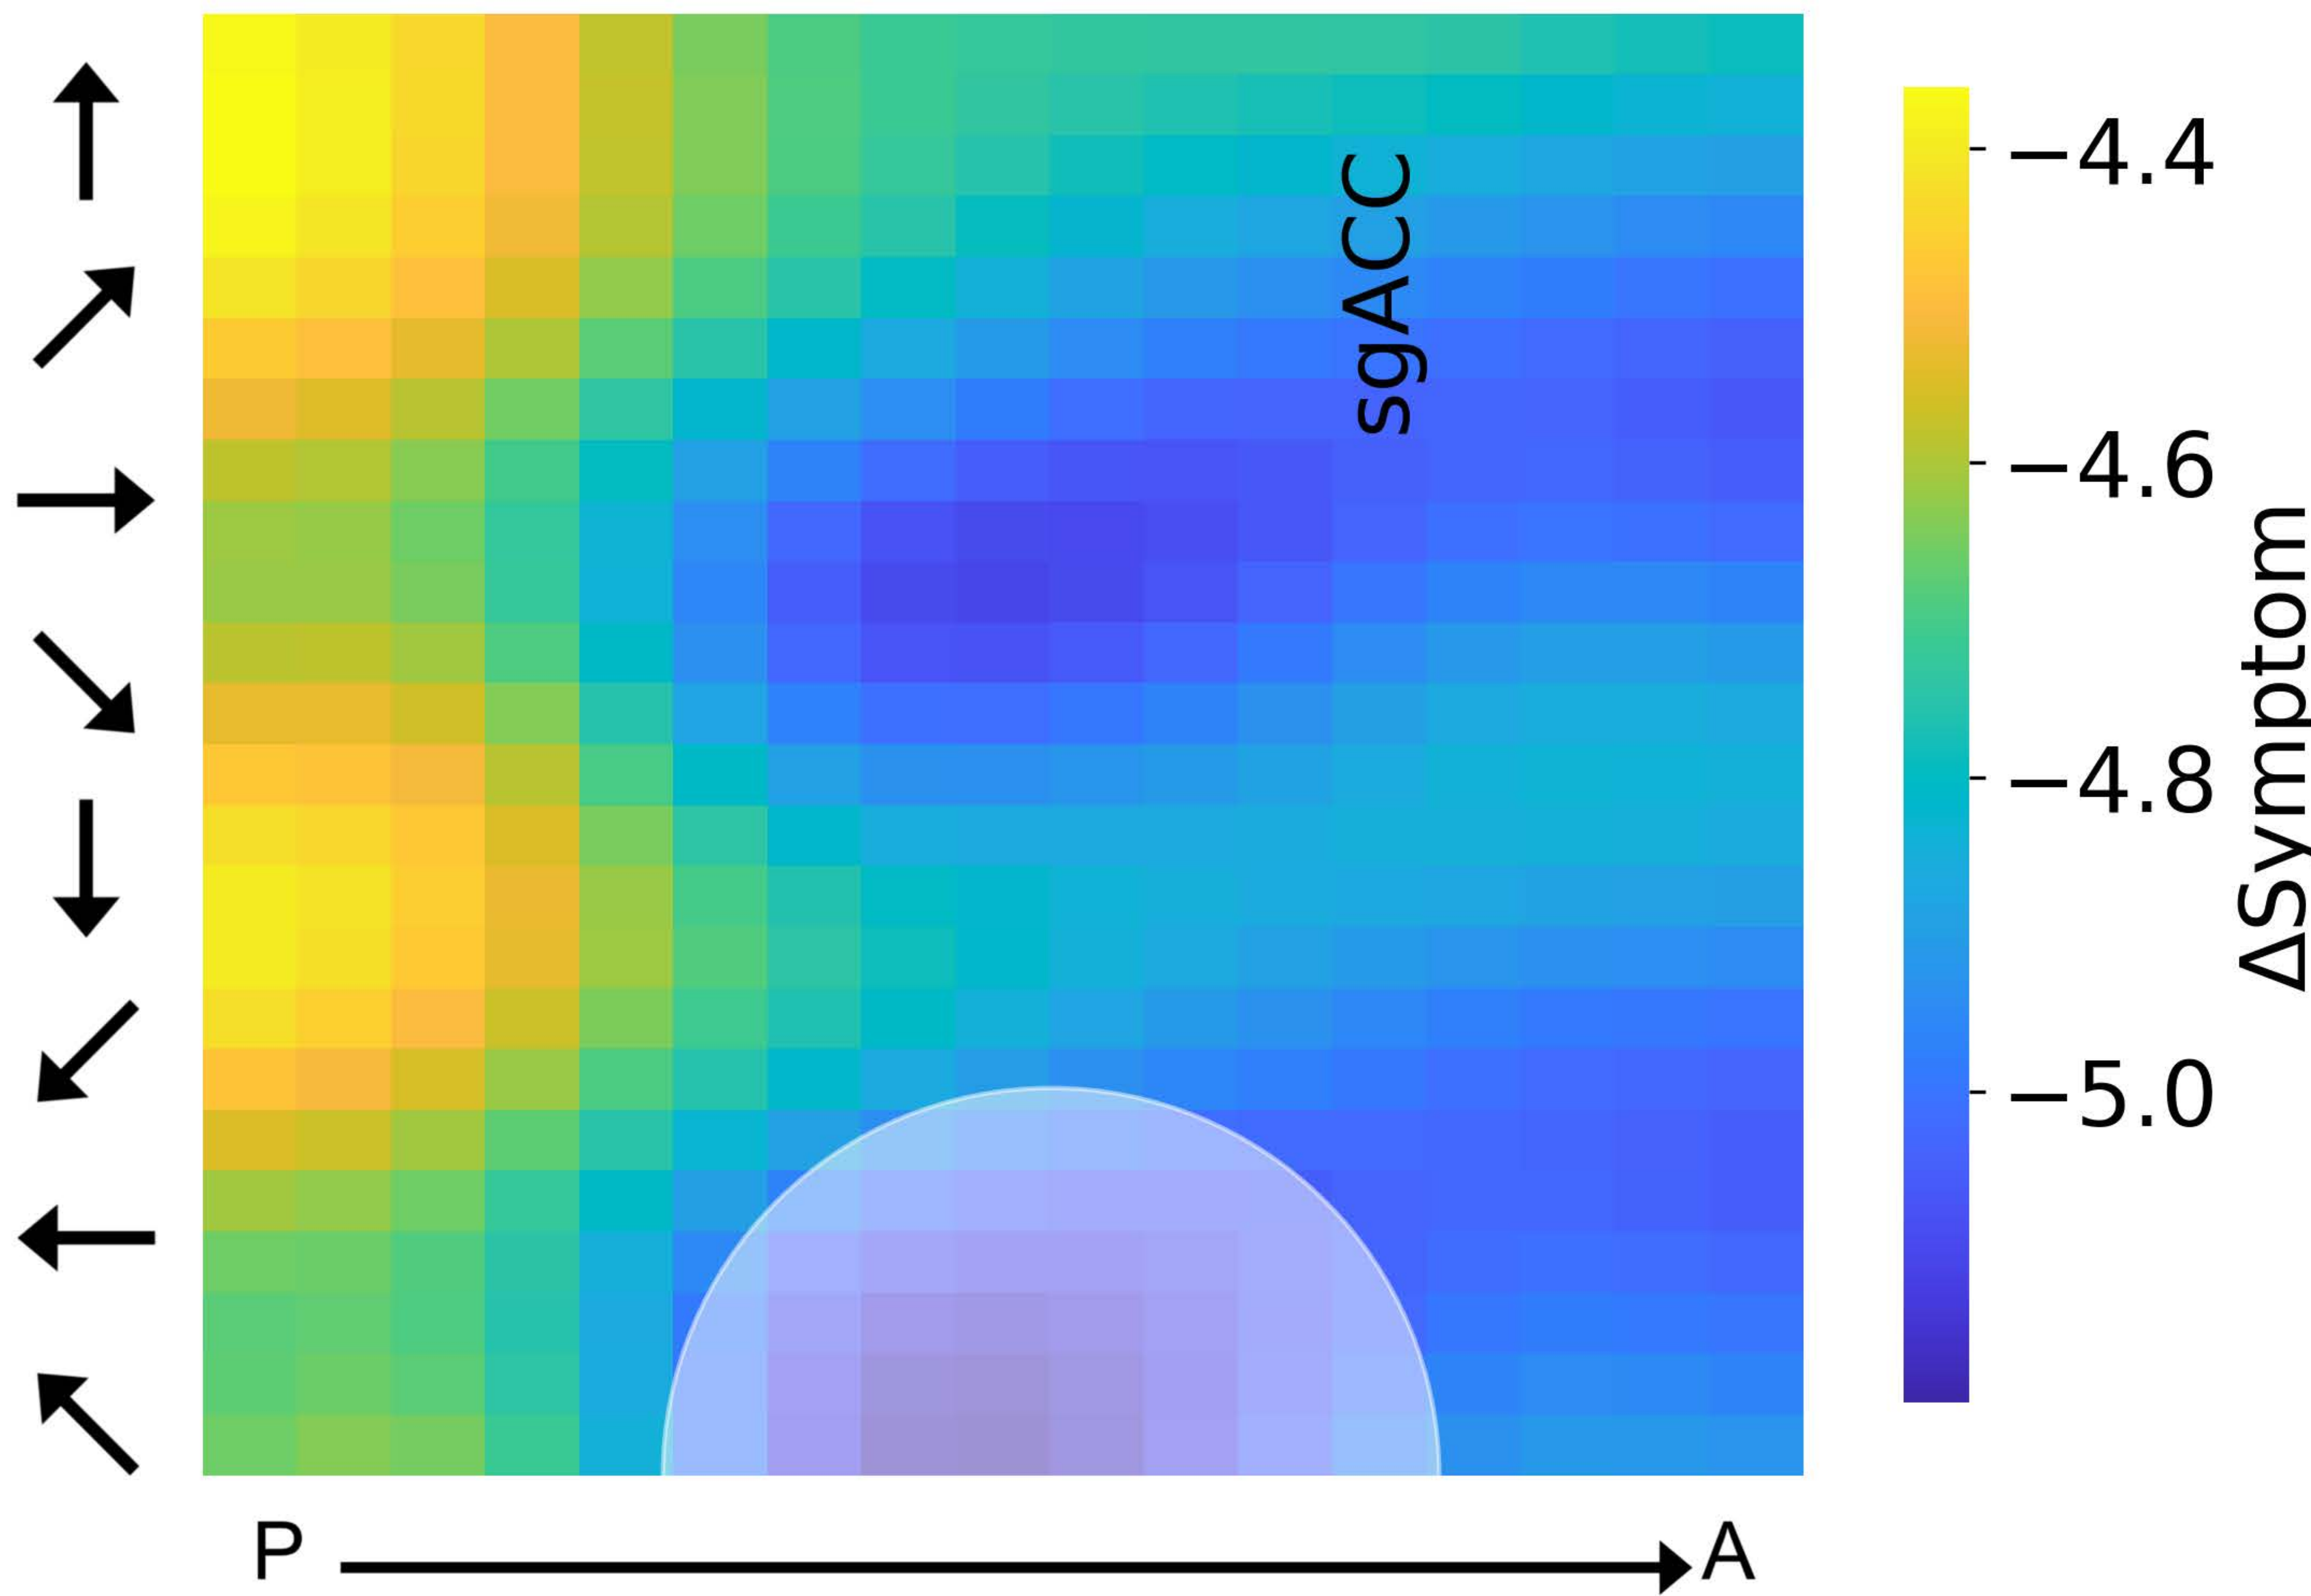



# NDARXA148KPL\_madrs\_left\_dlpfc

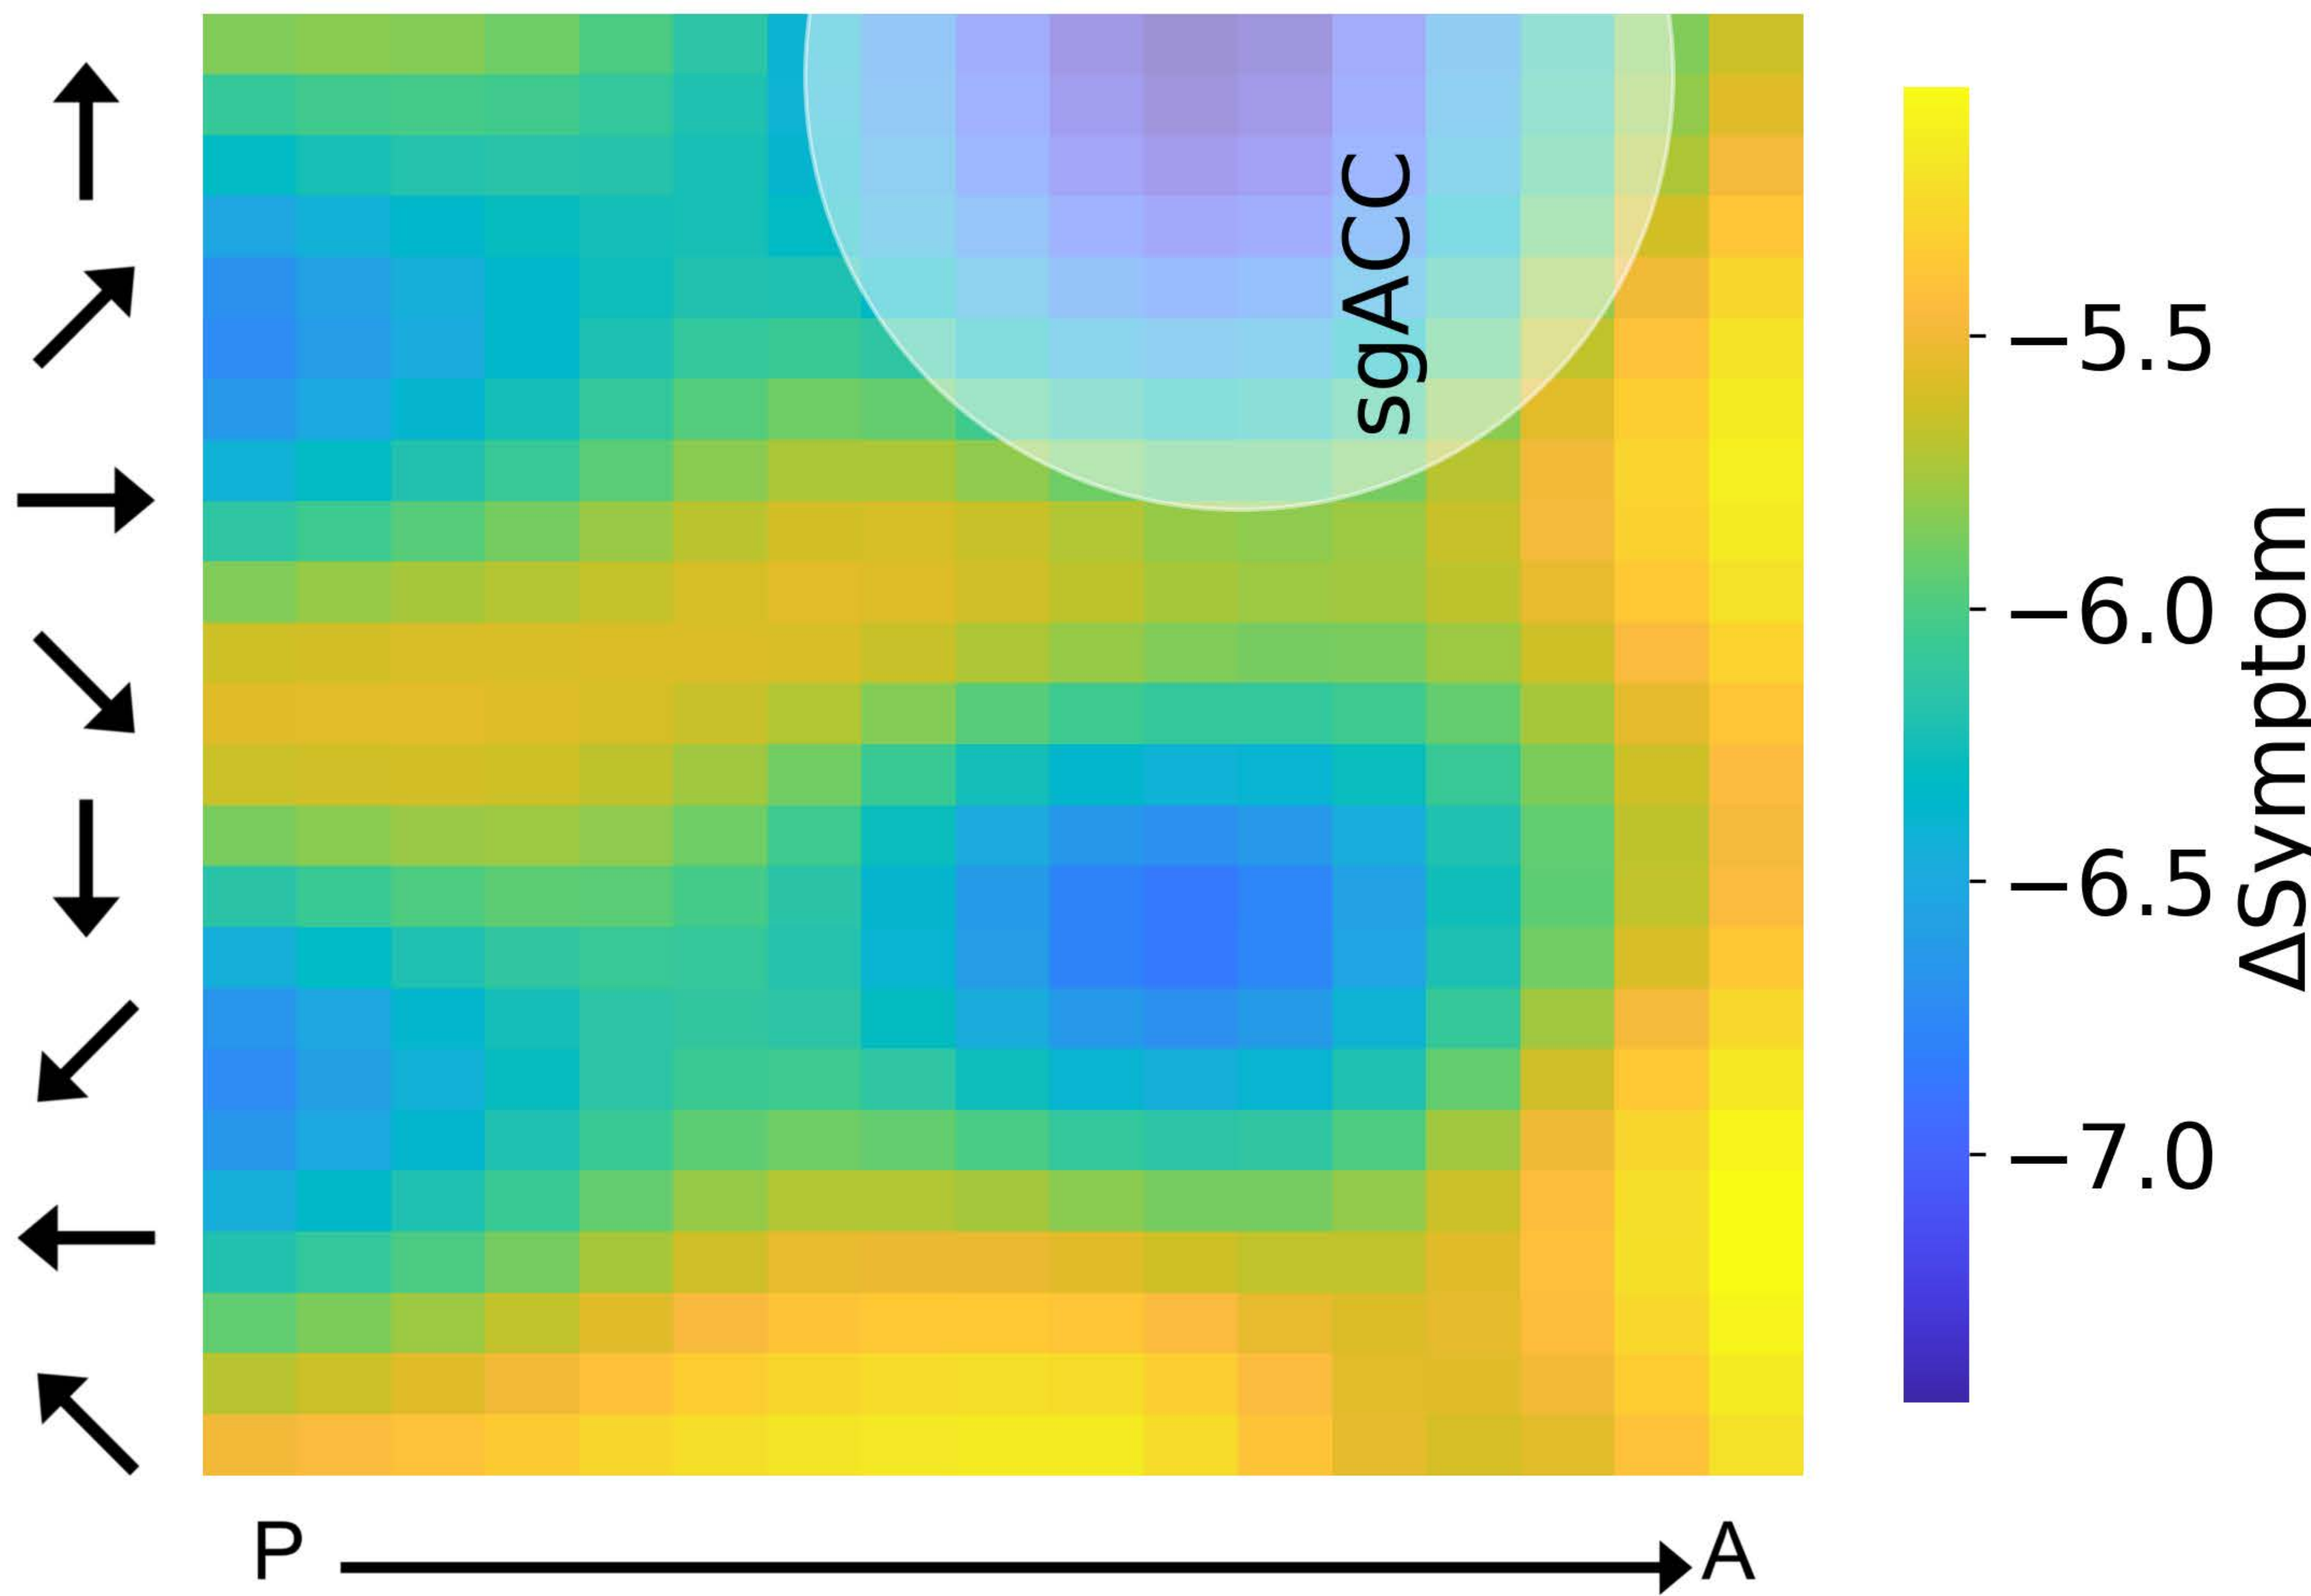



# NDARXD921NRV\_madrs\_left\_dlpfc

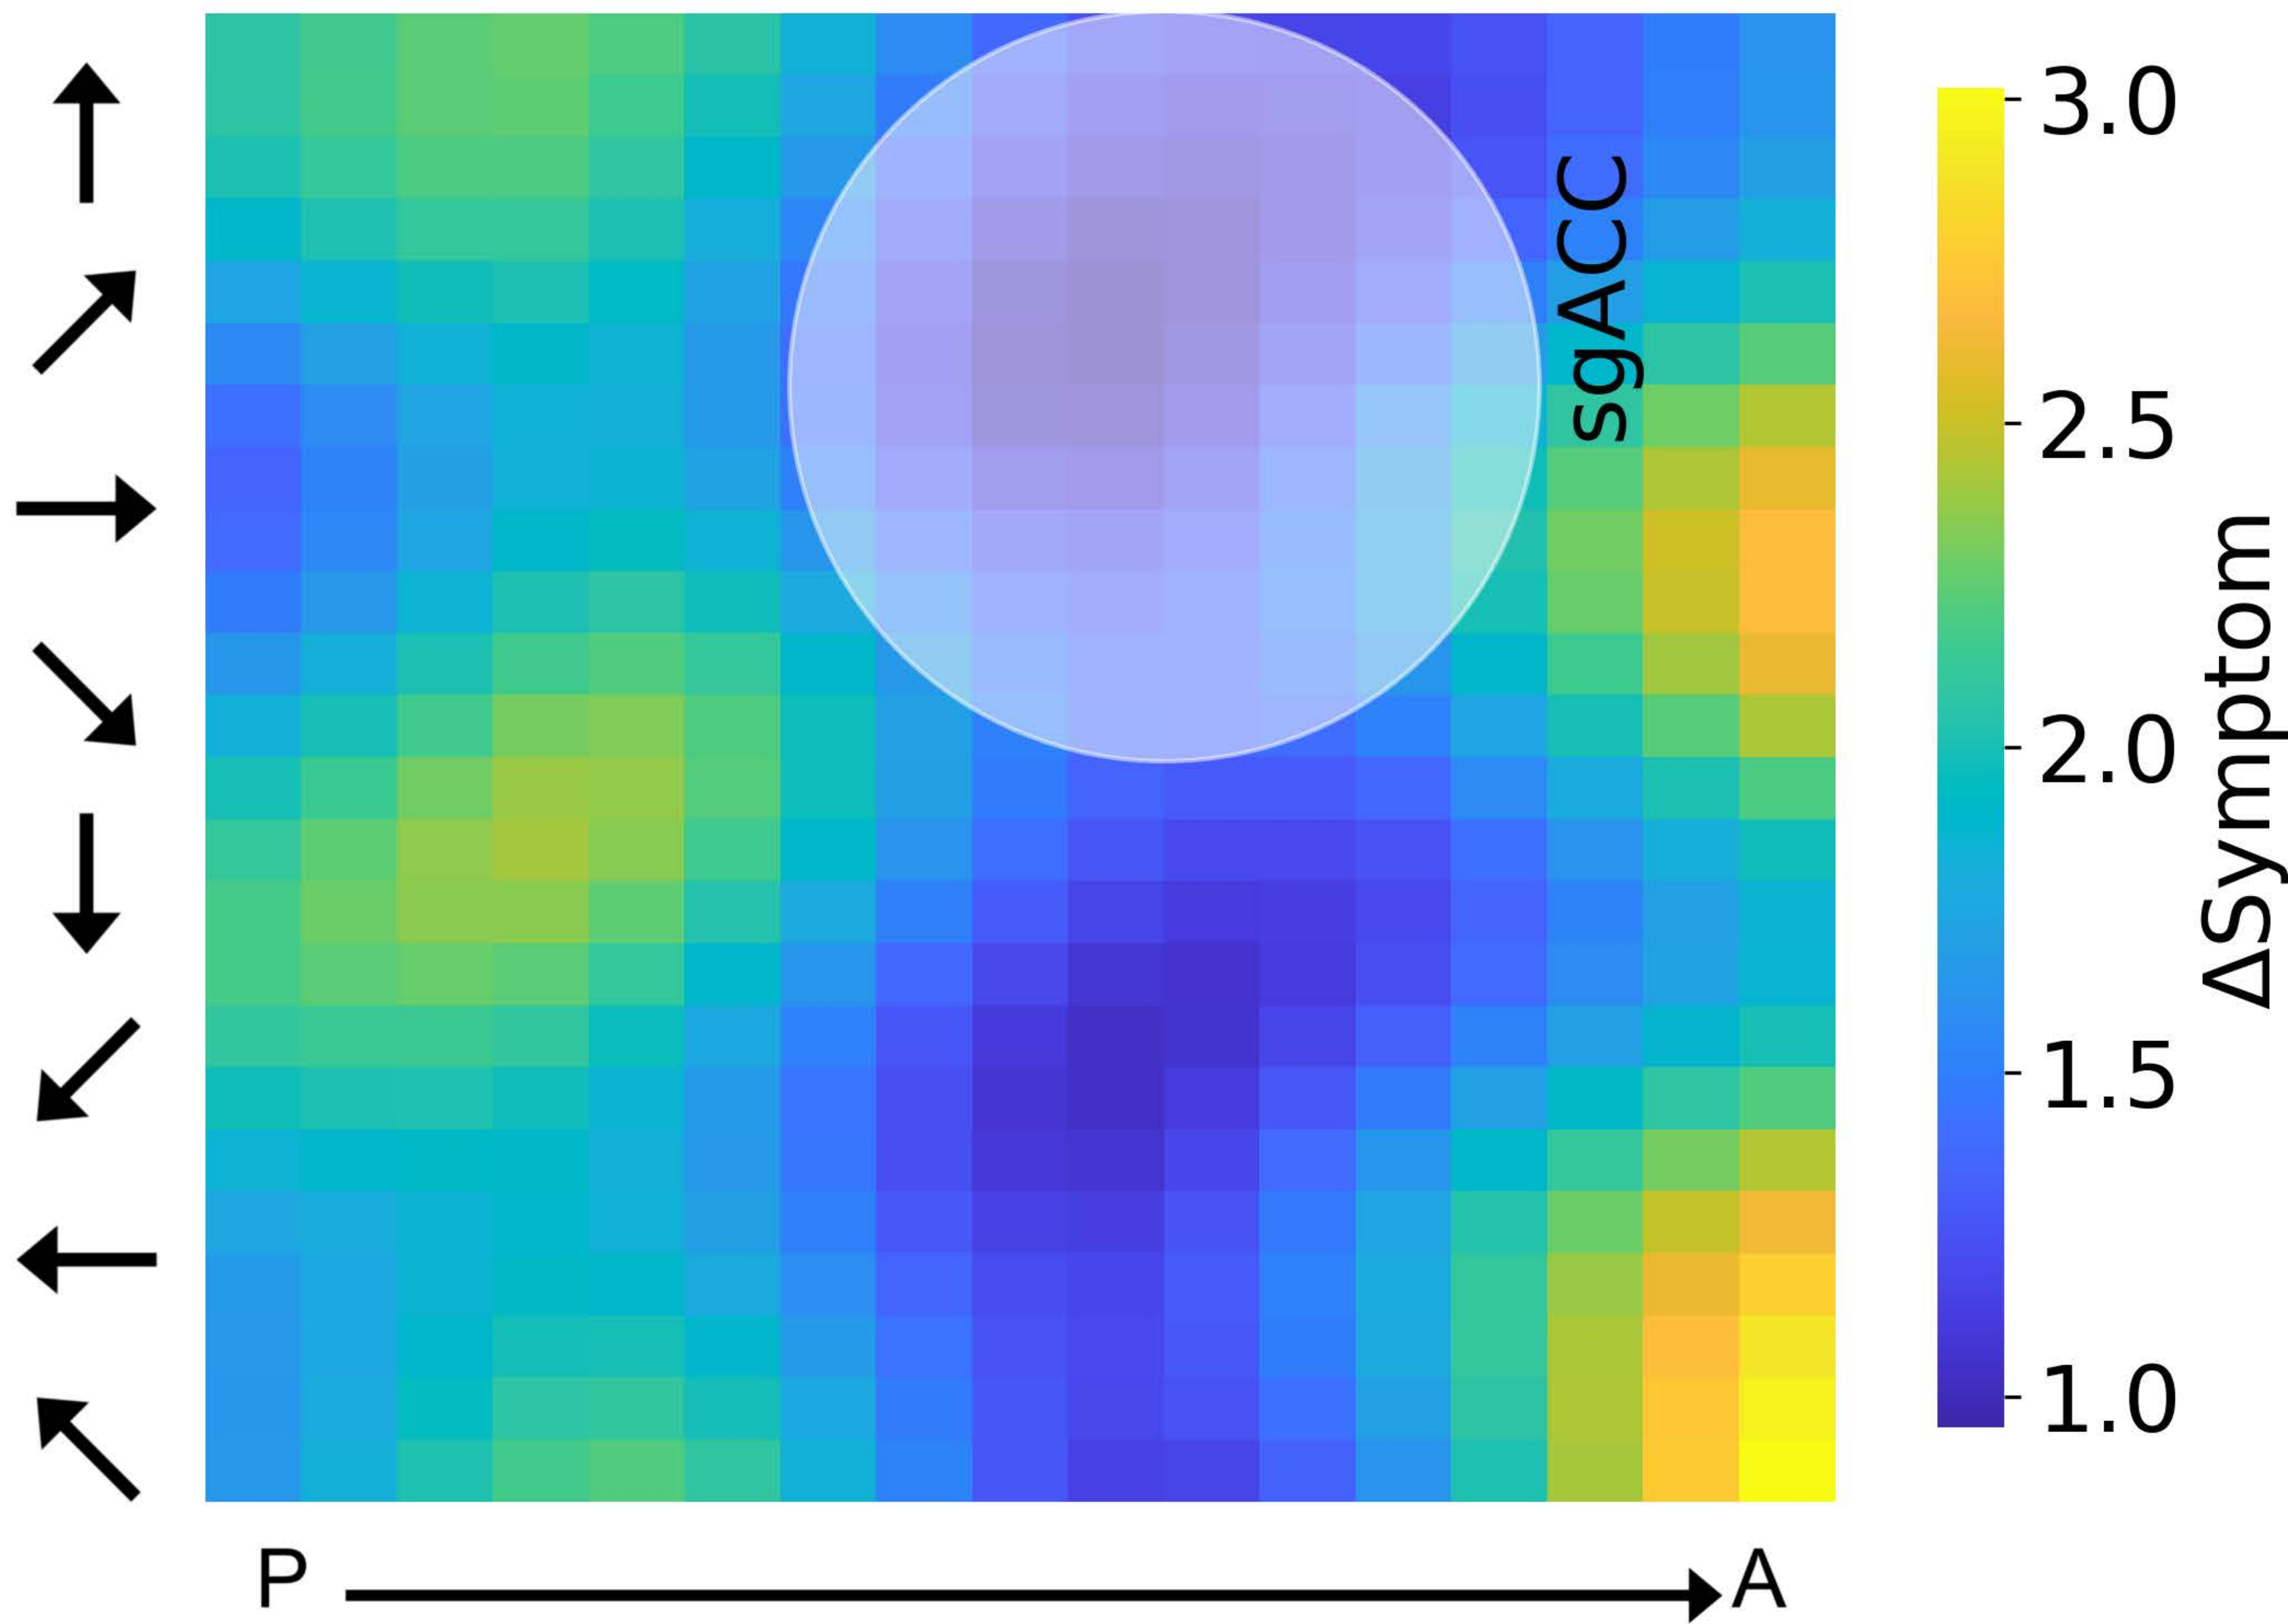



# NDARXU500EFT\_madrs\_left\_dlpfc

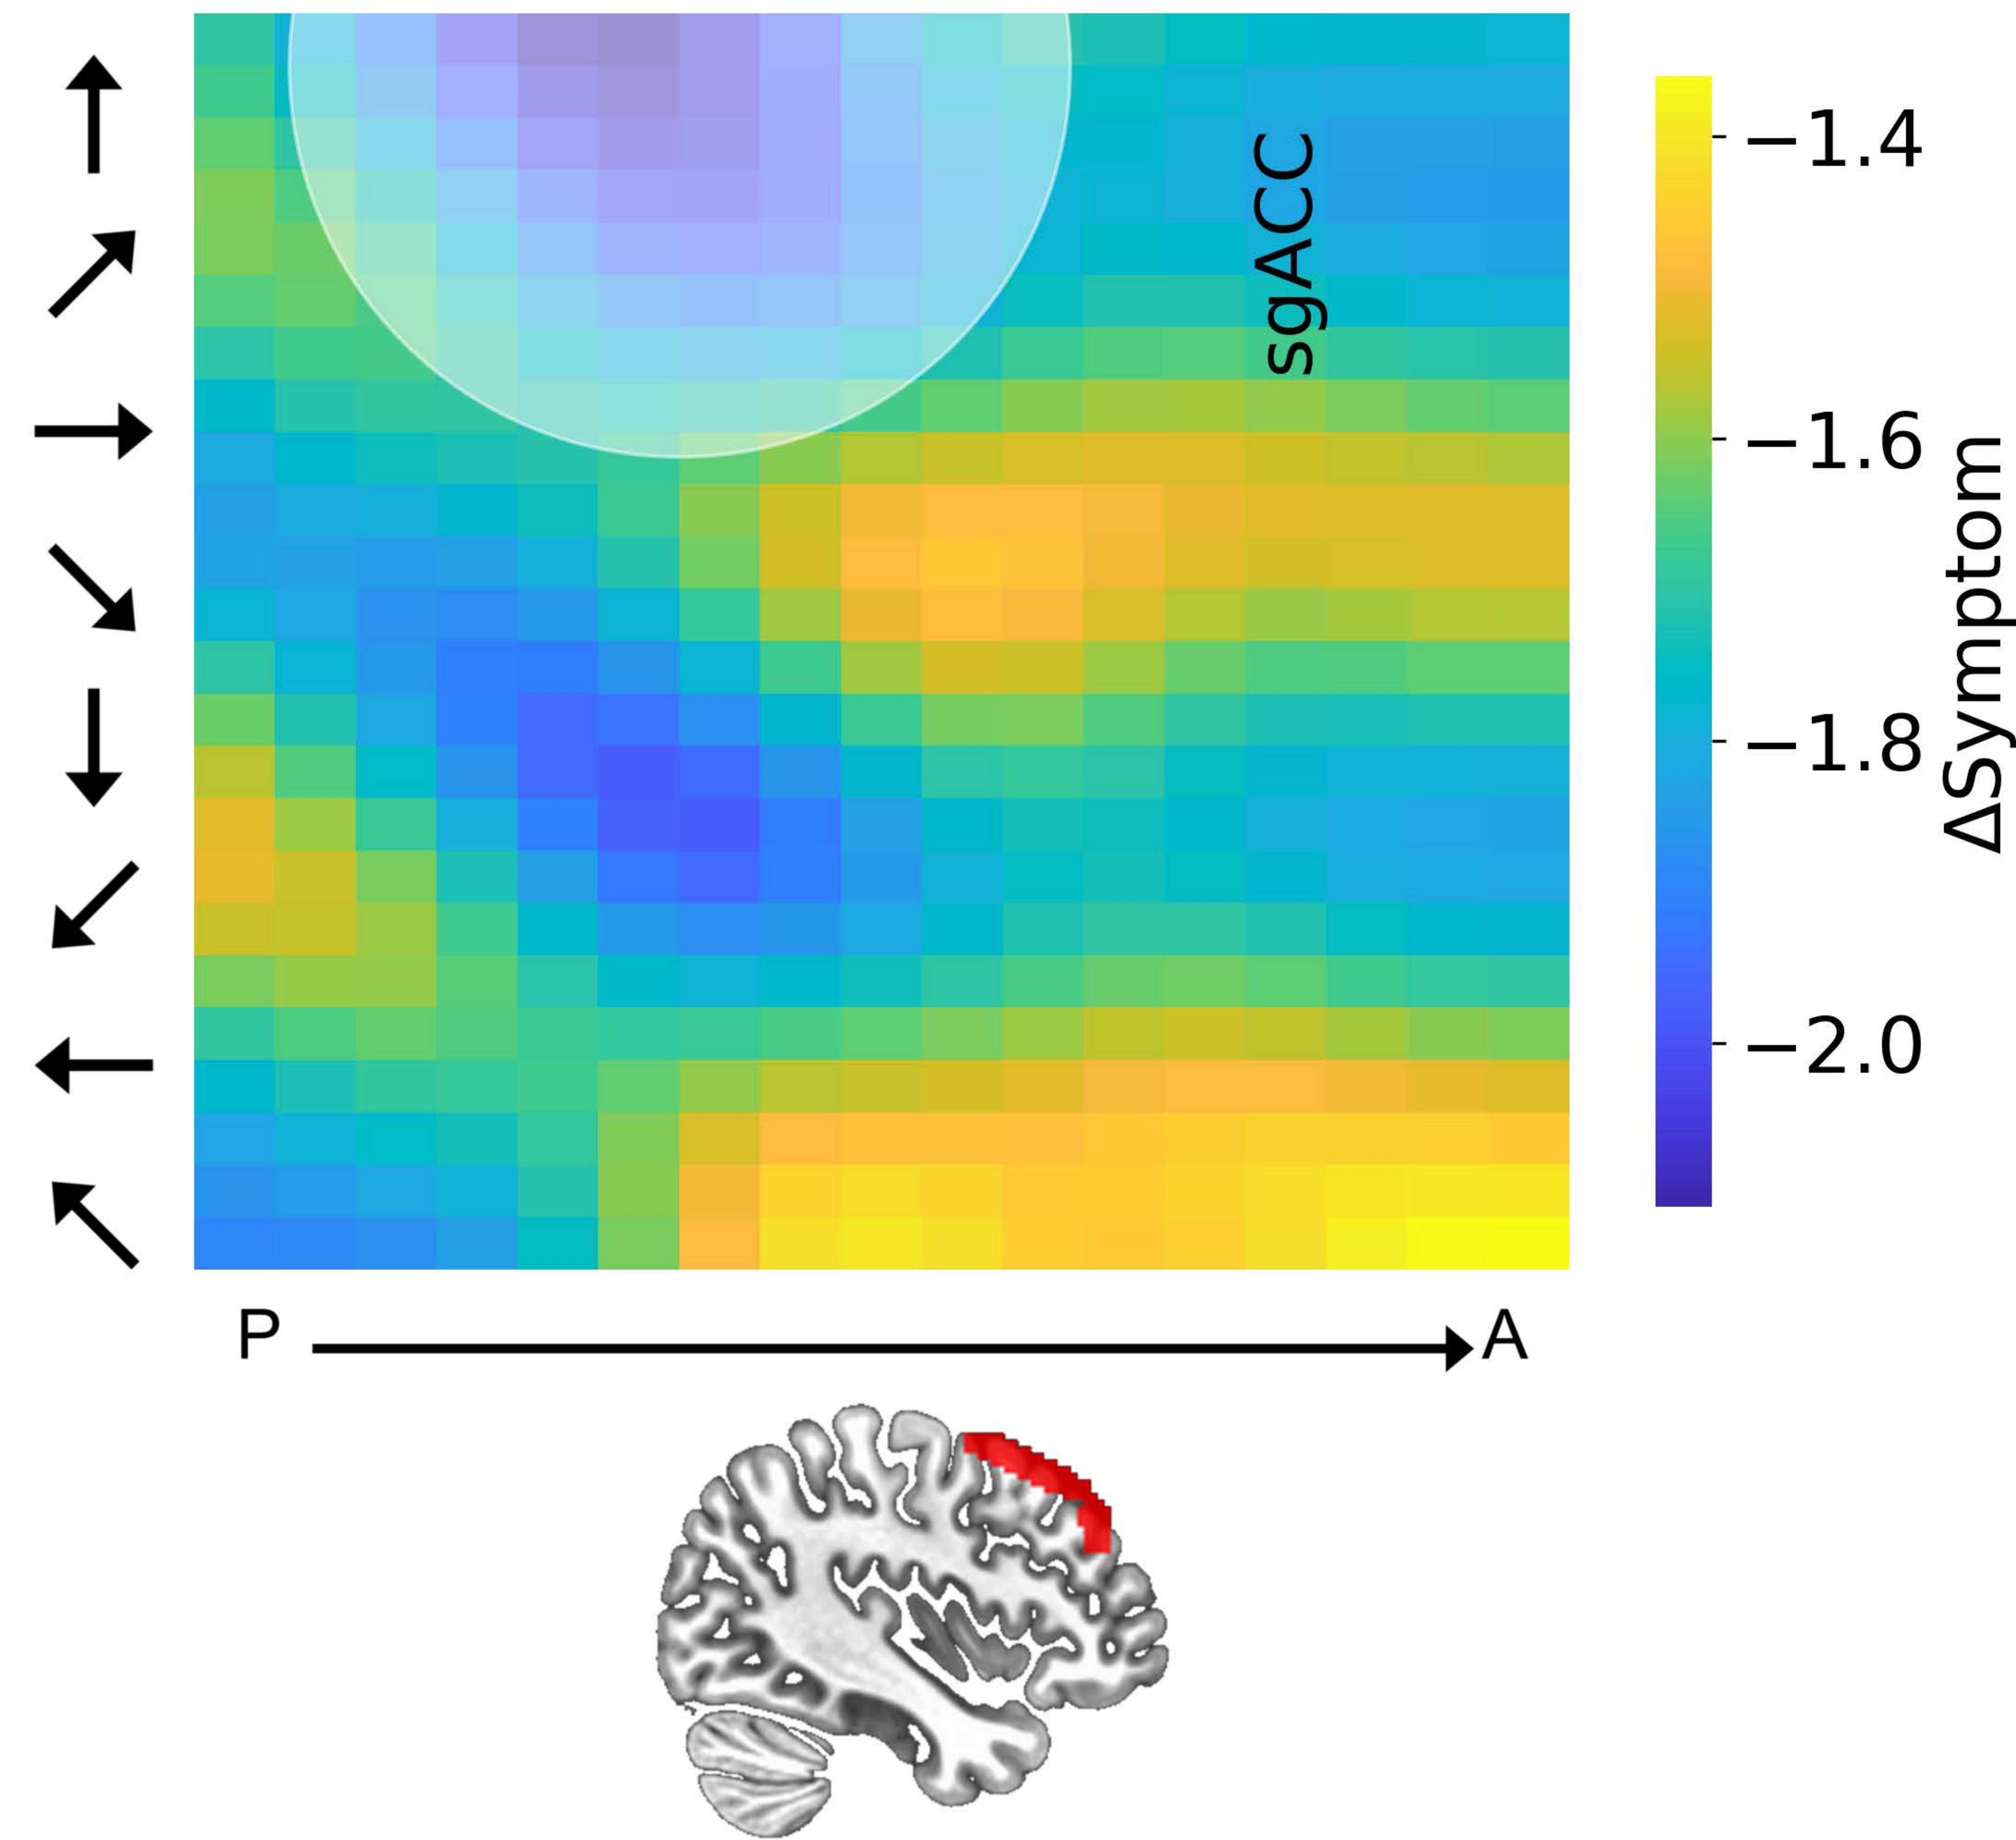



# NDARYB181GTB\_madrs\_left\_dlpfc

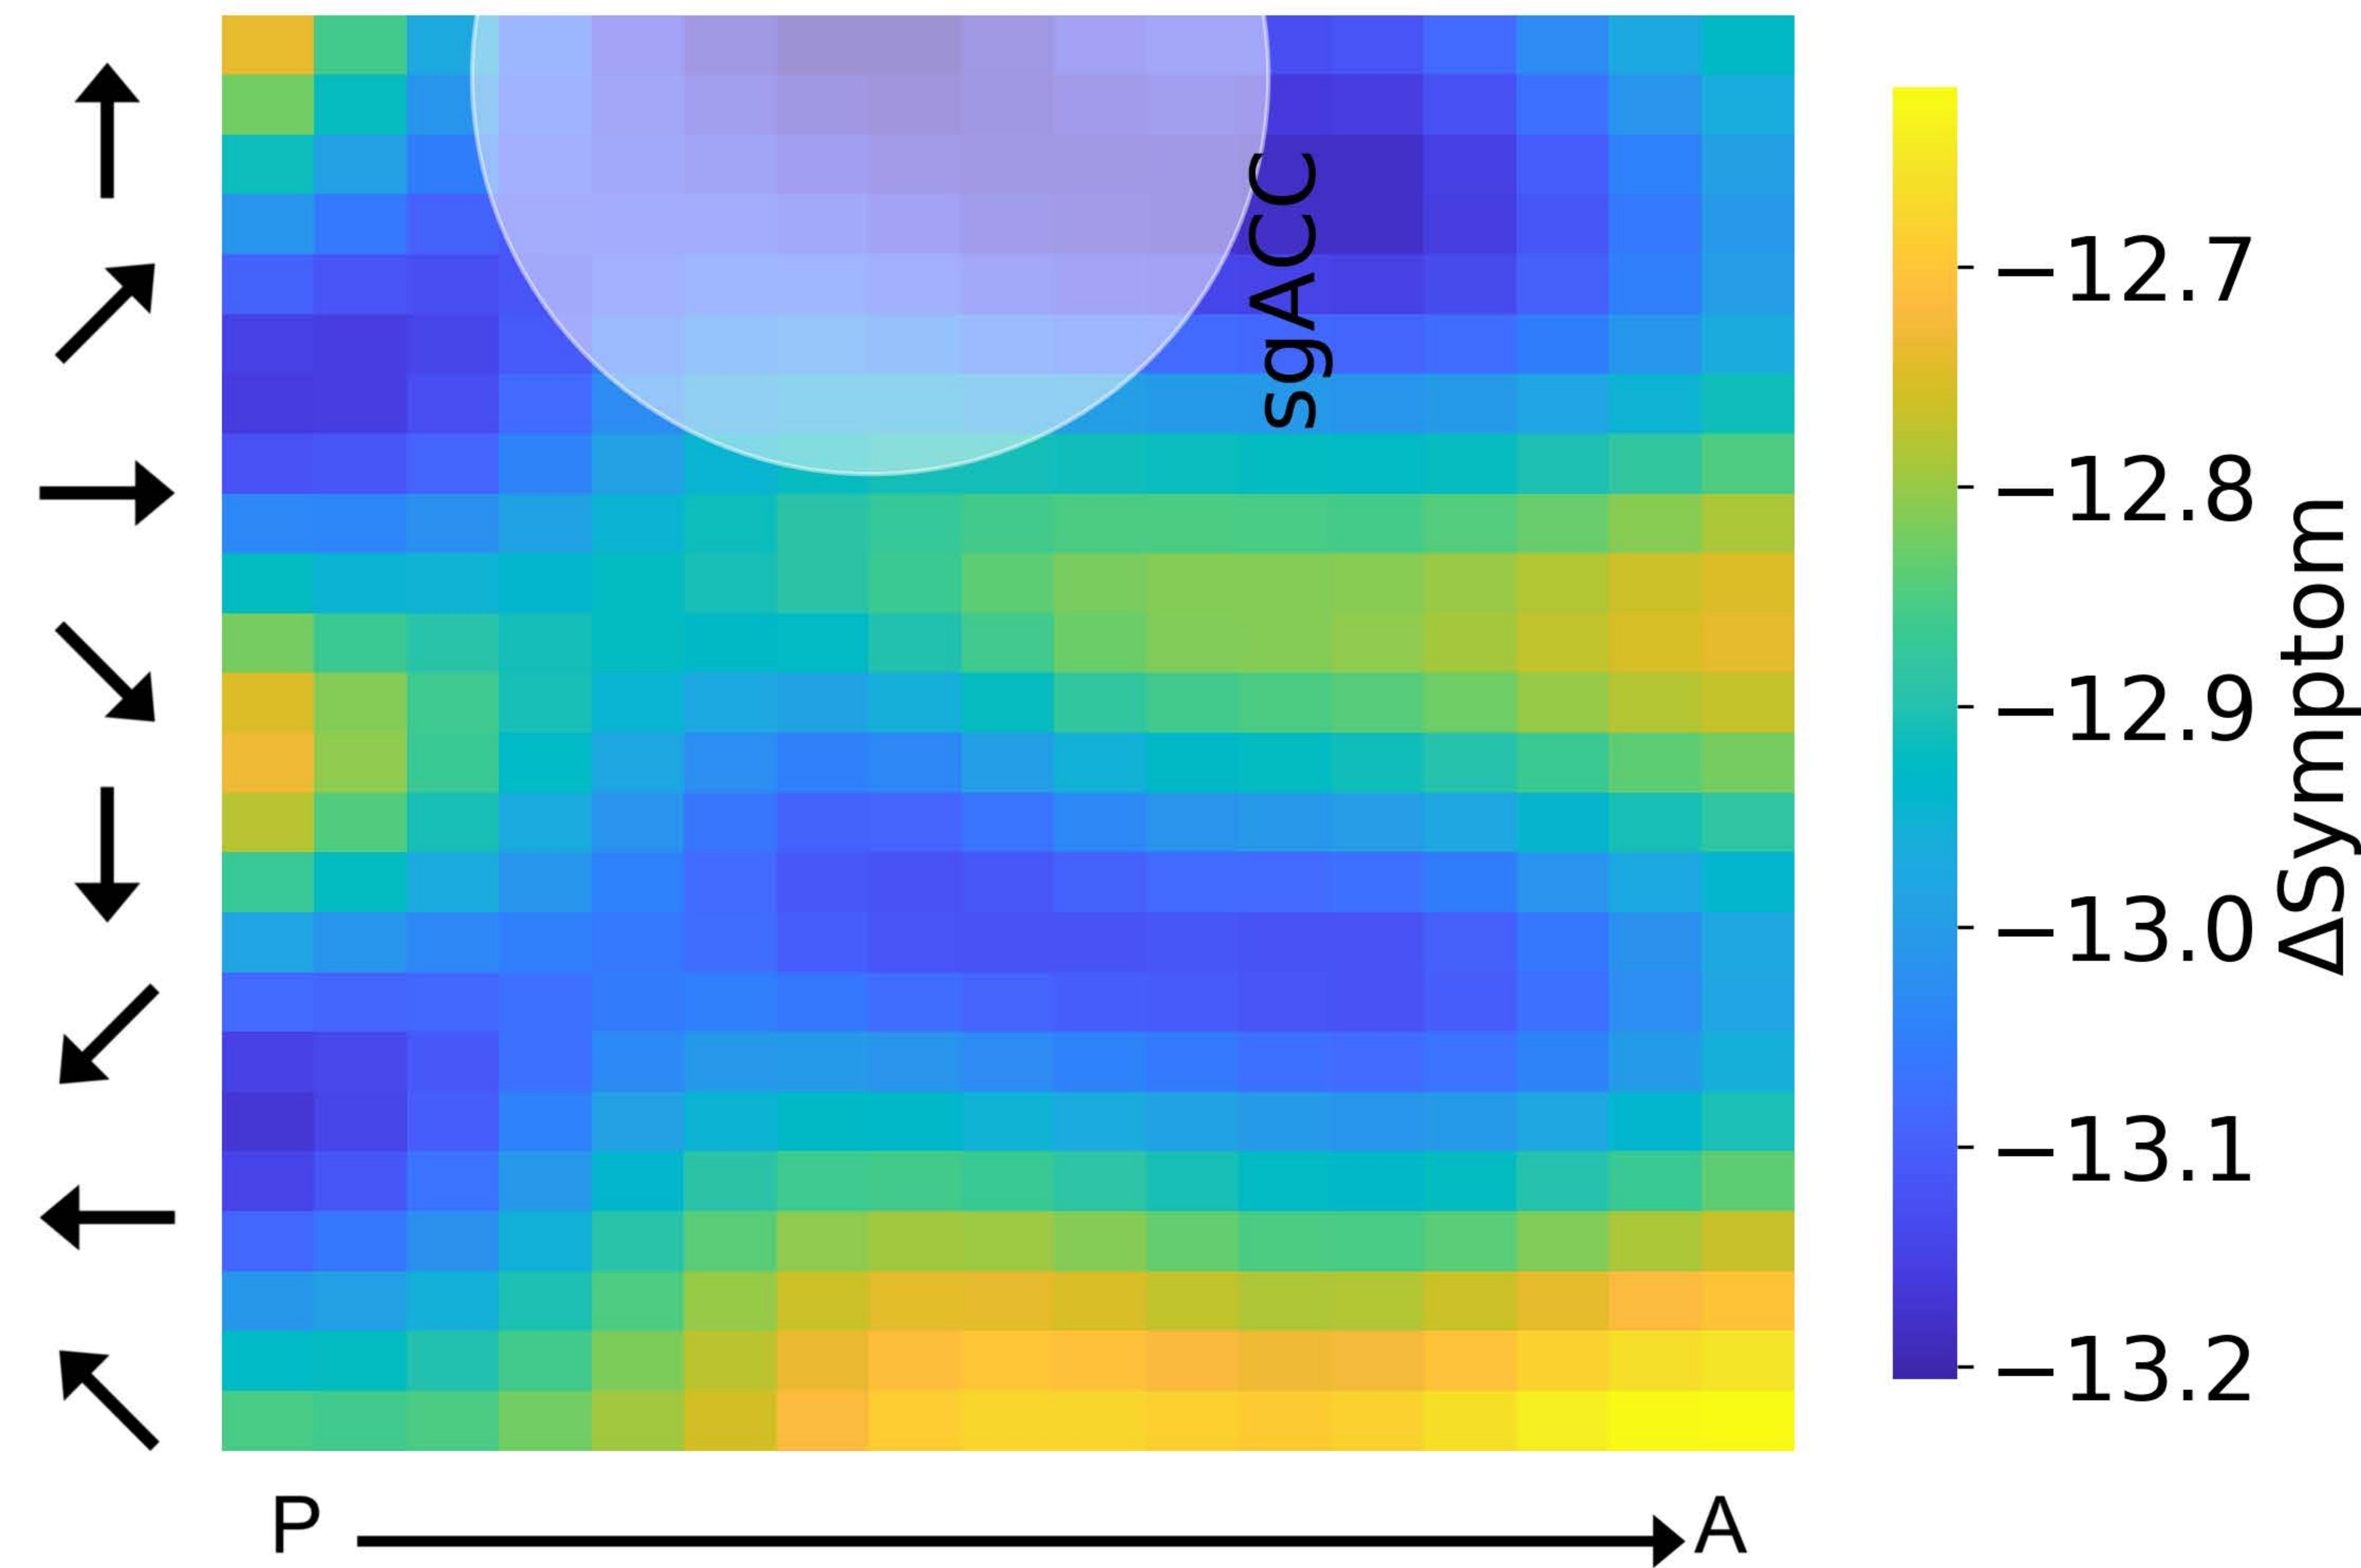



# NDARYD169AYQ\_madrs\_left\_dlpfc

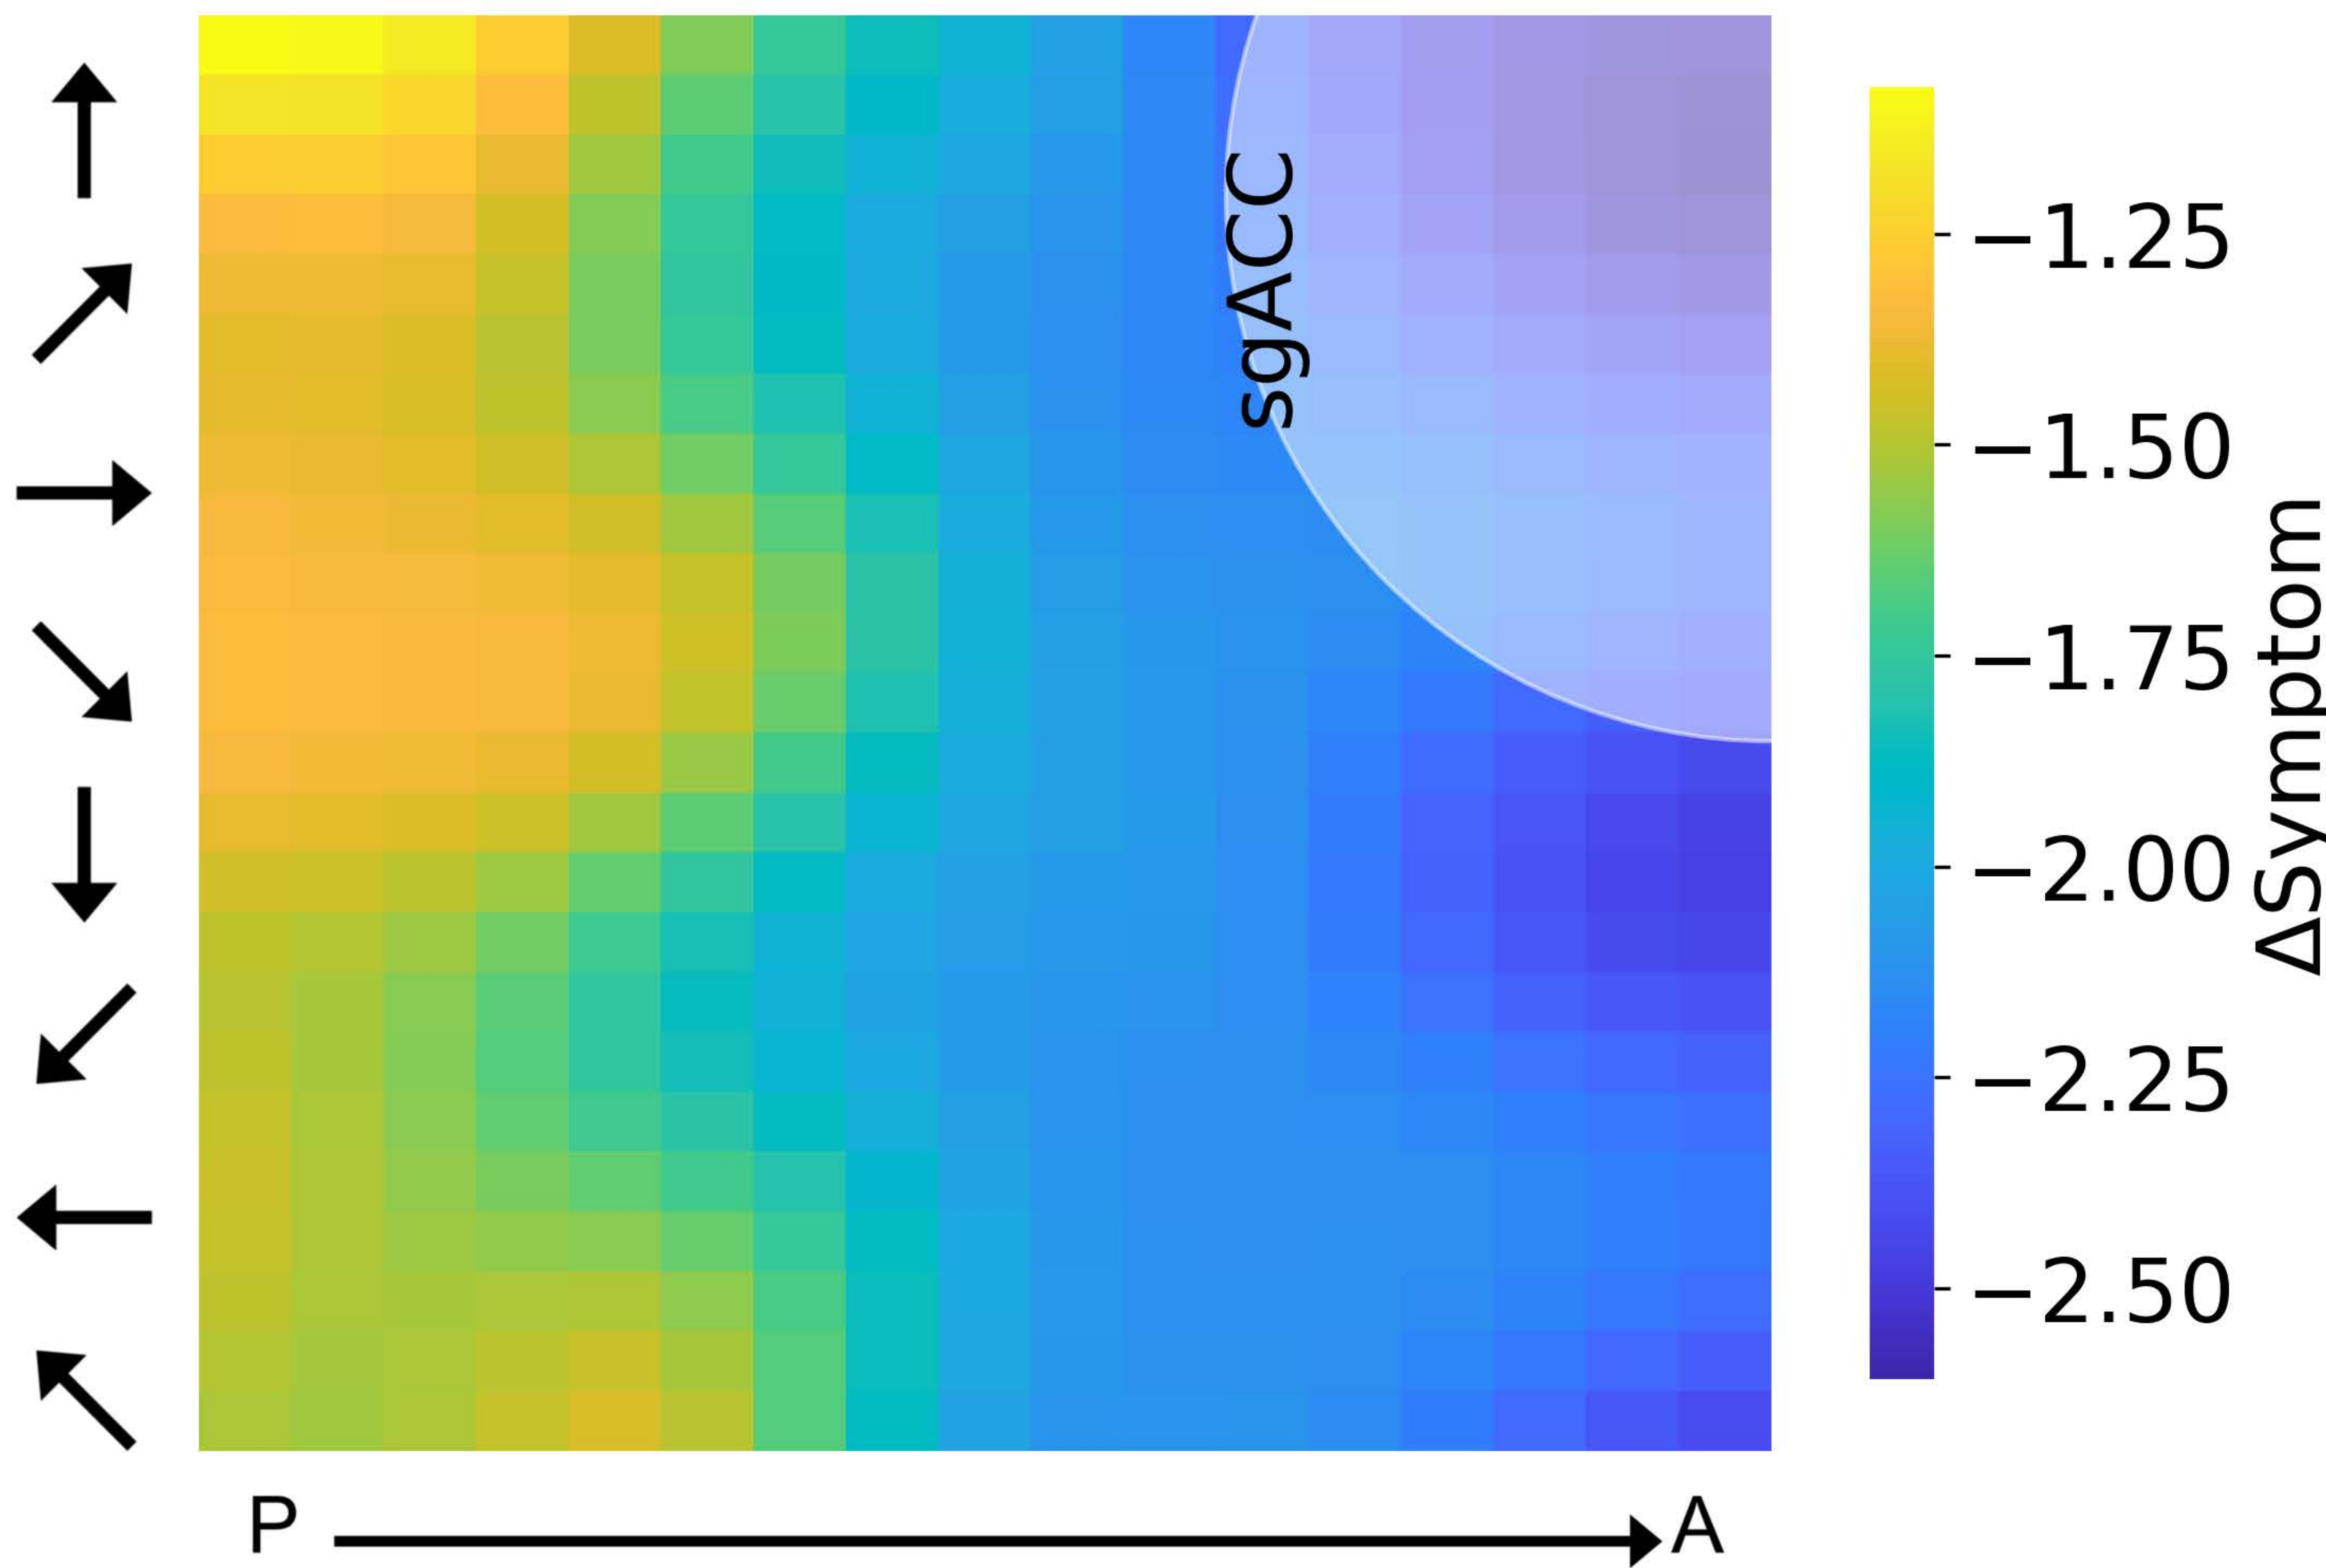



NDARYE405JL\_madrs\_left\_dlpfc

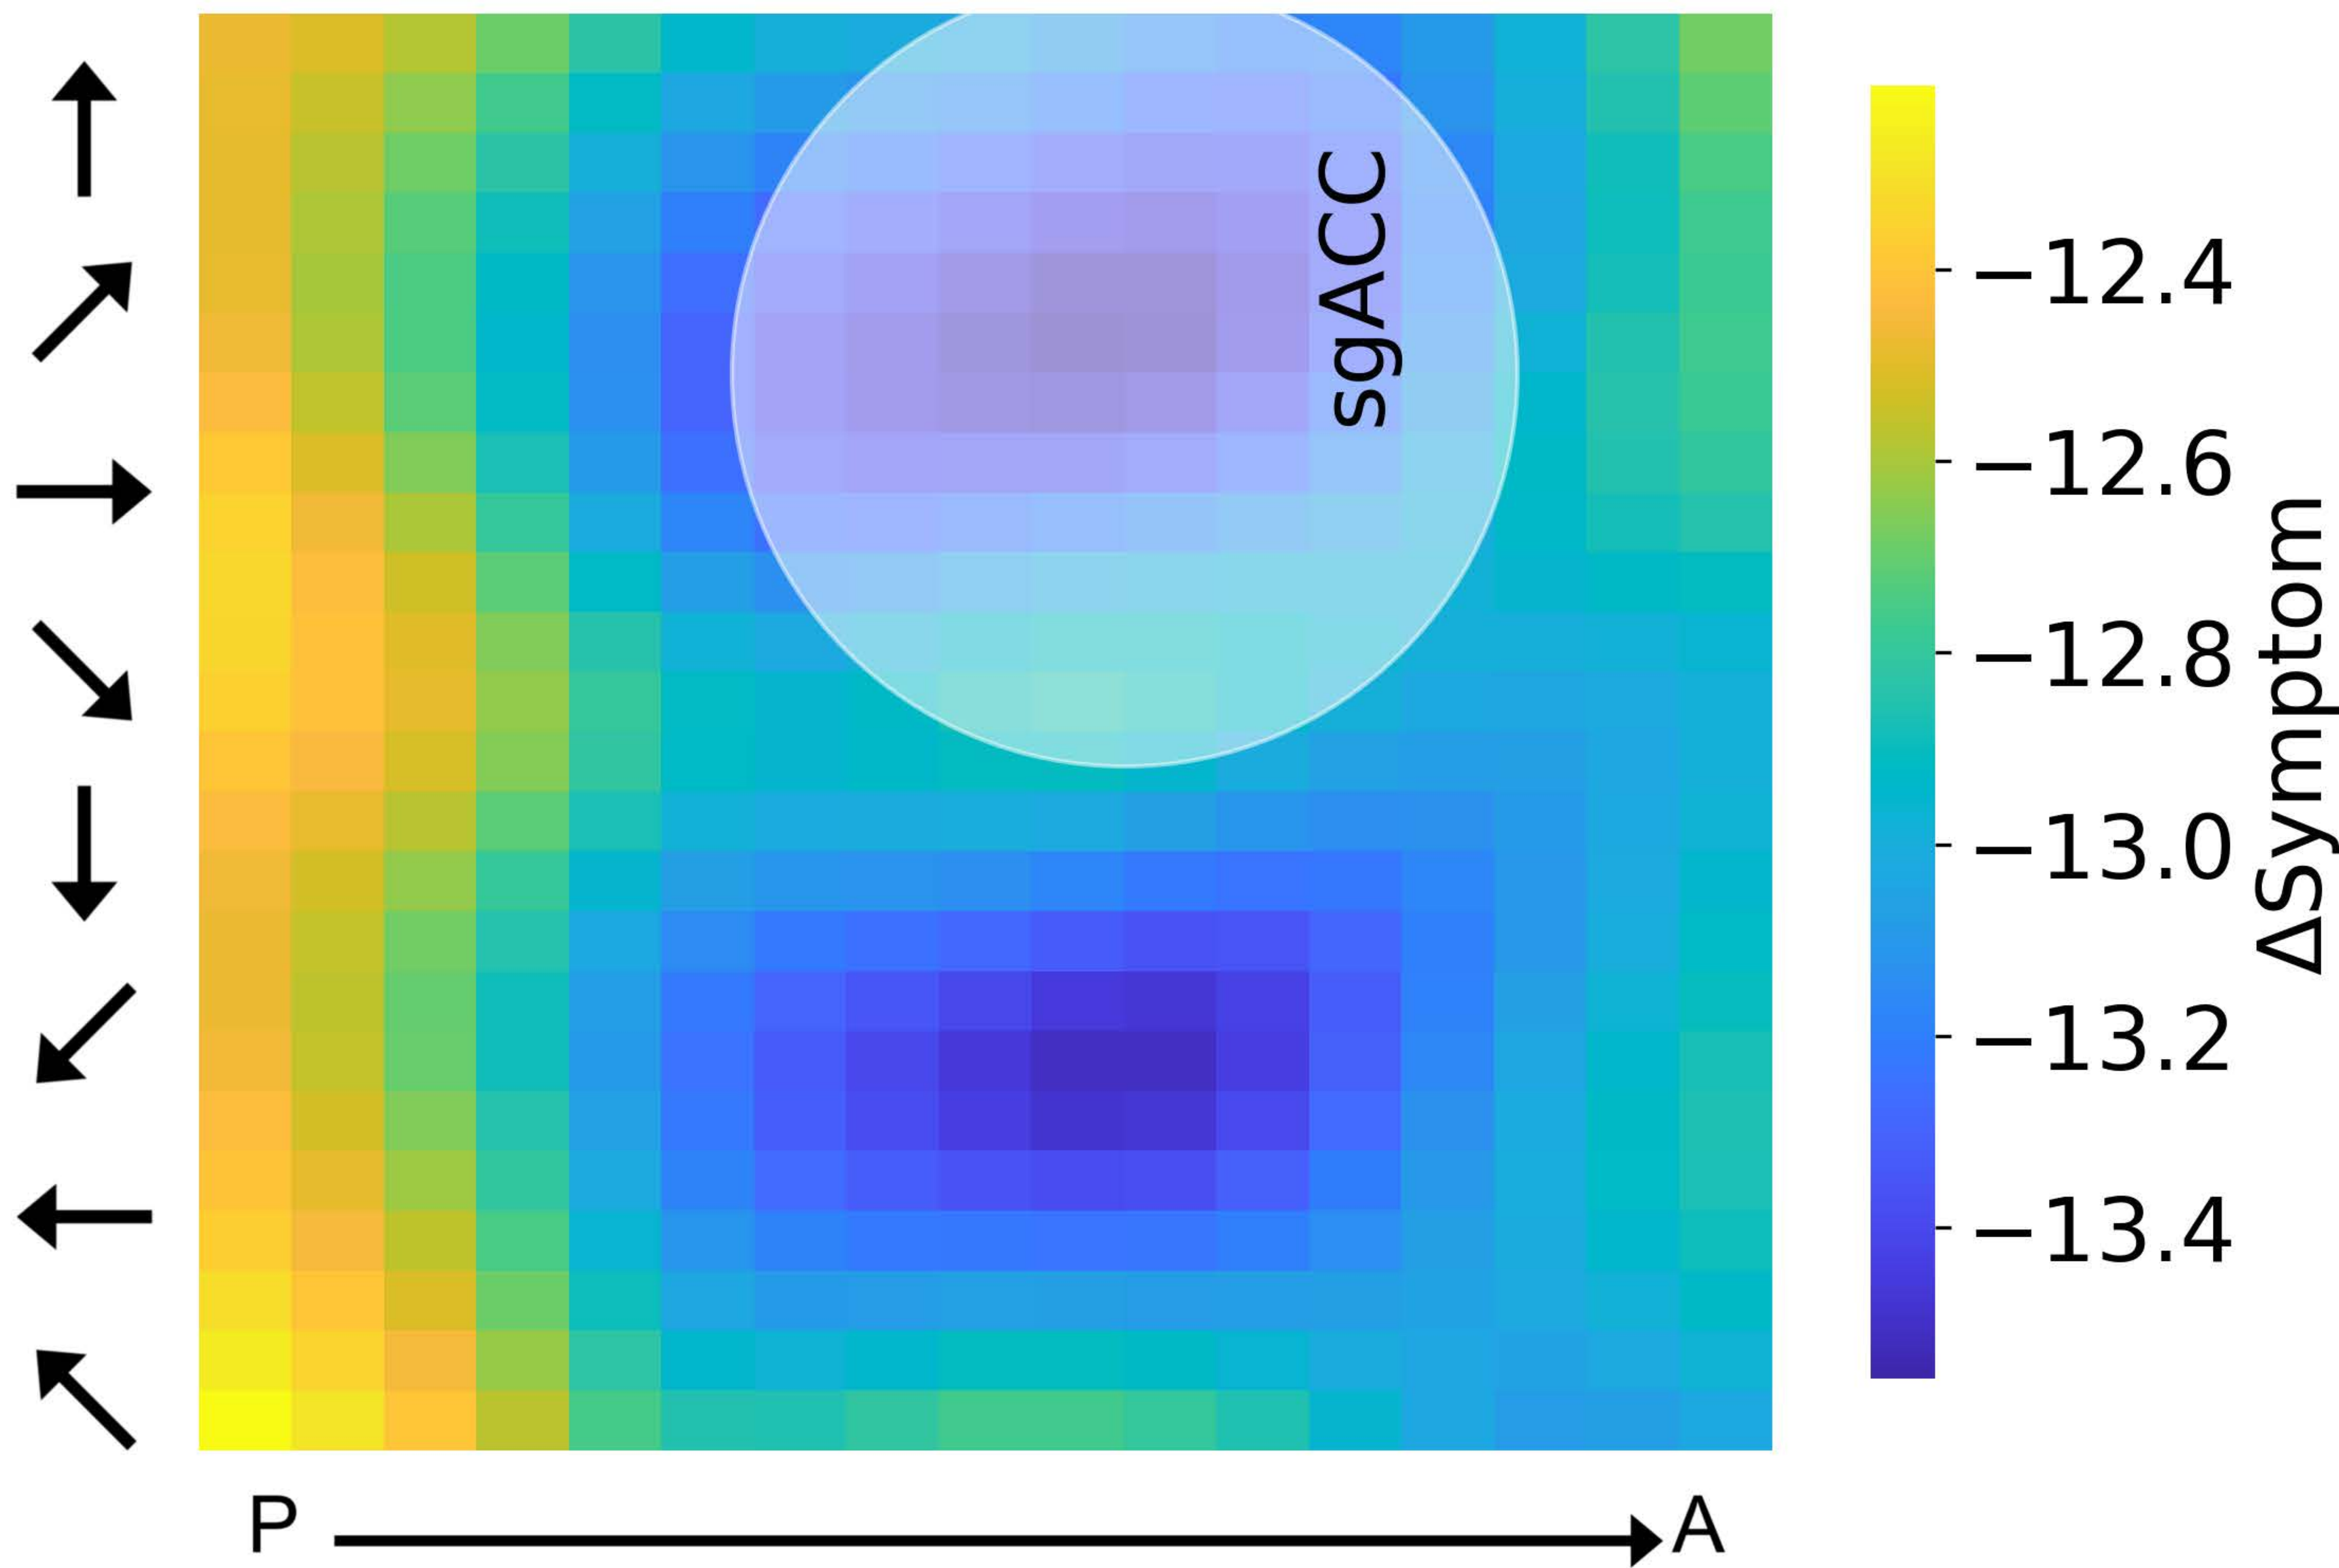



# NDARYM648GK3\_madrs\_left\_dlpfc

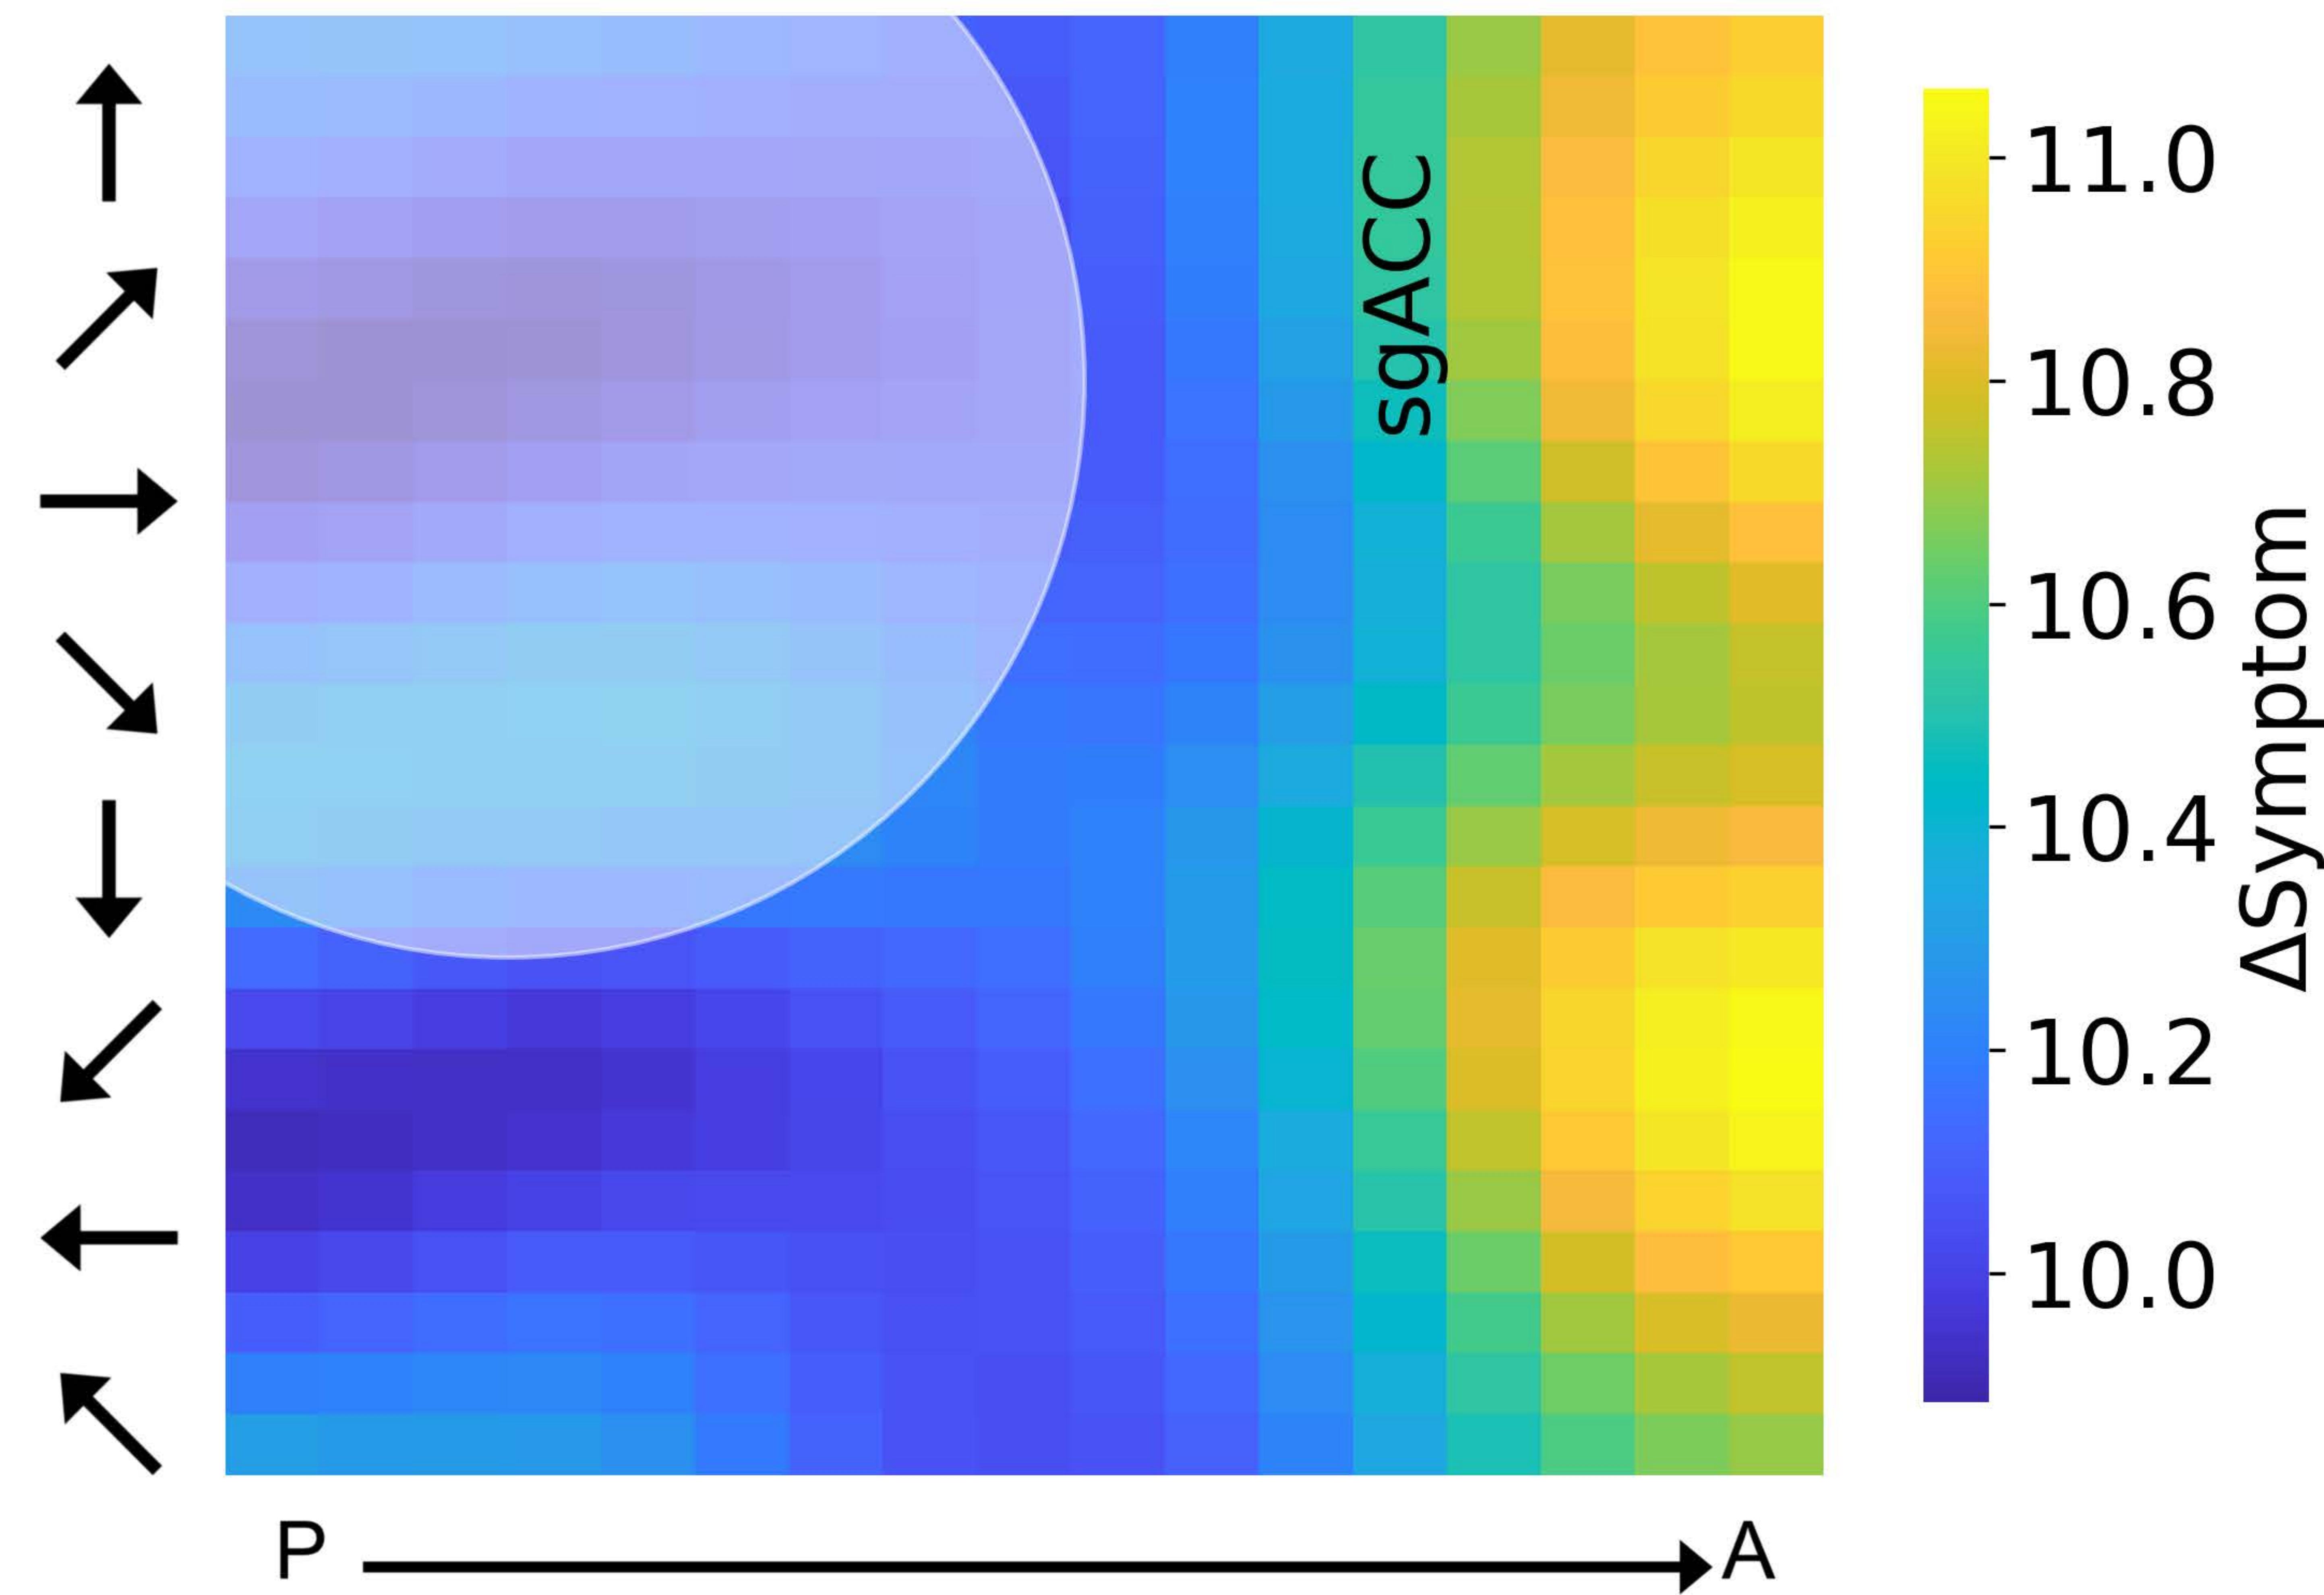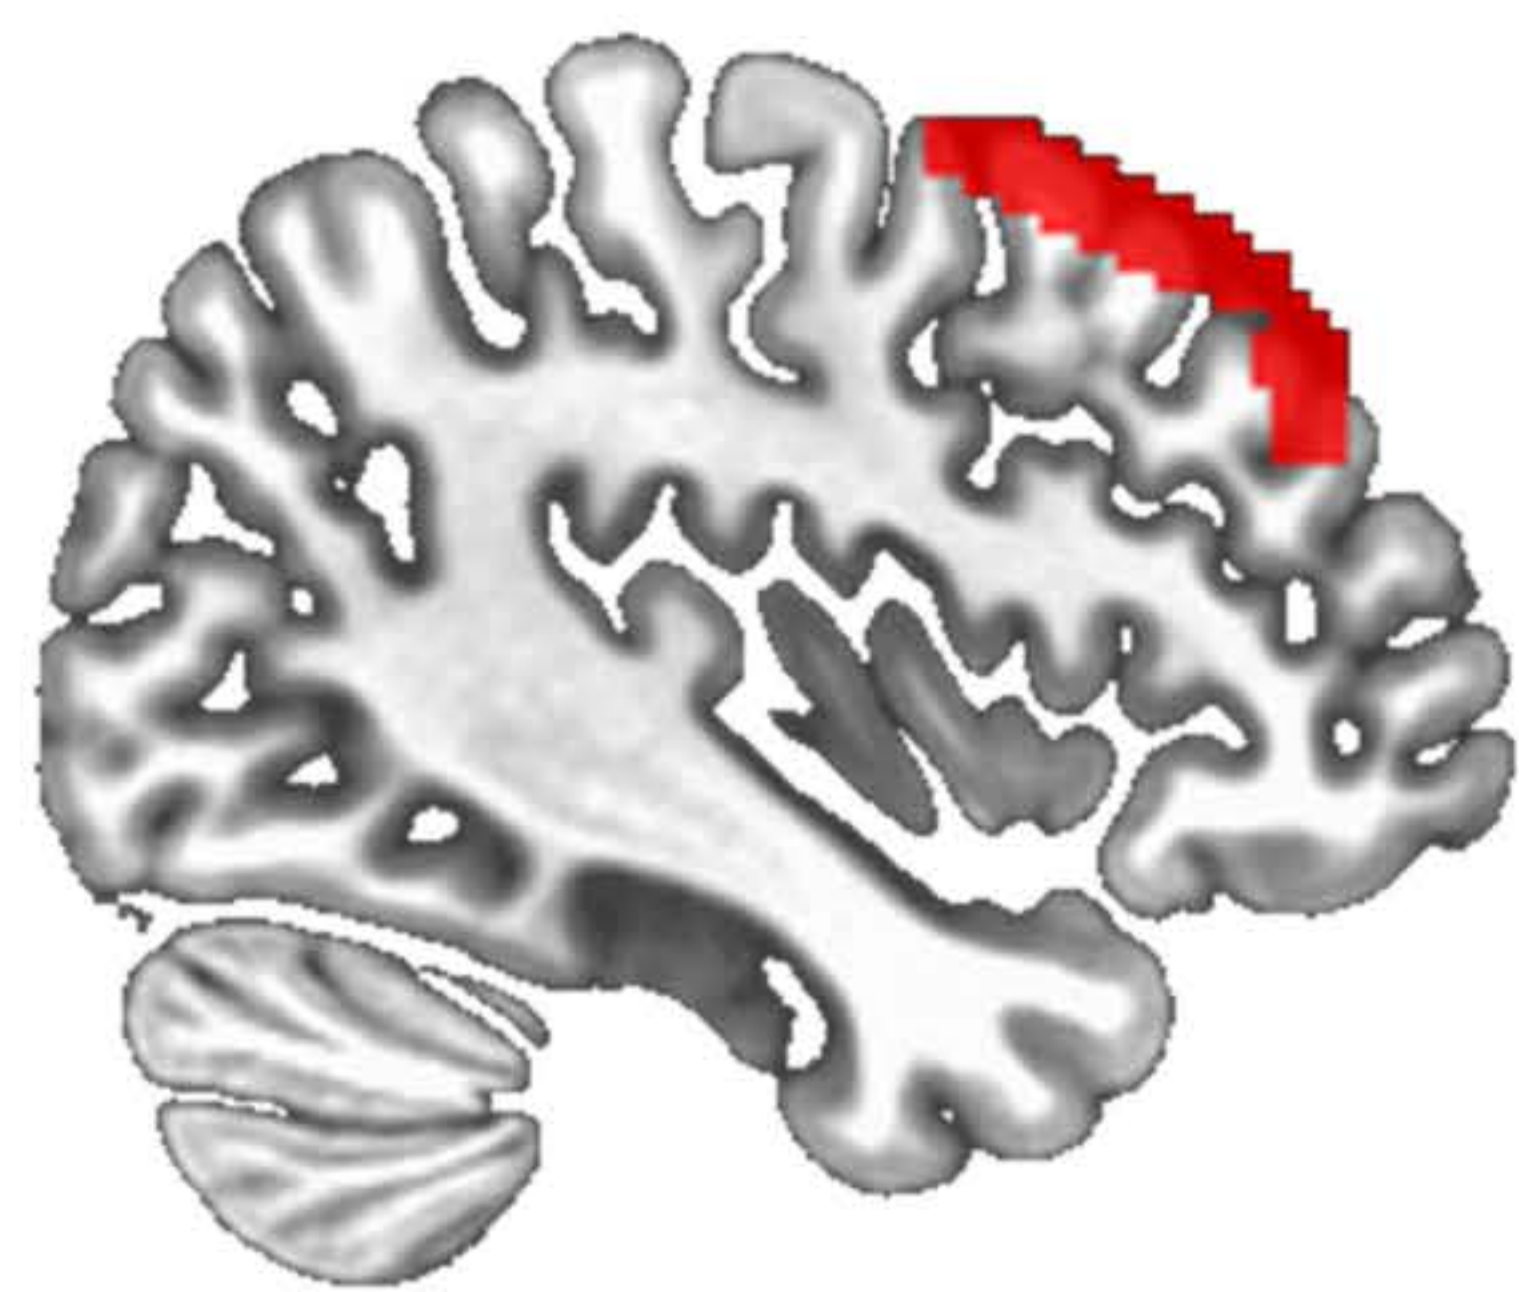



# NDARZH200GZU\_madrs\_left\_dlpfc

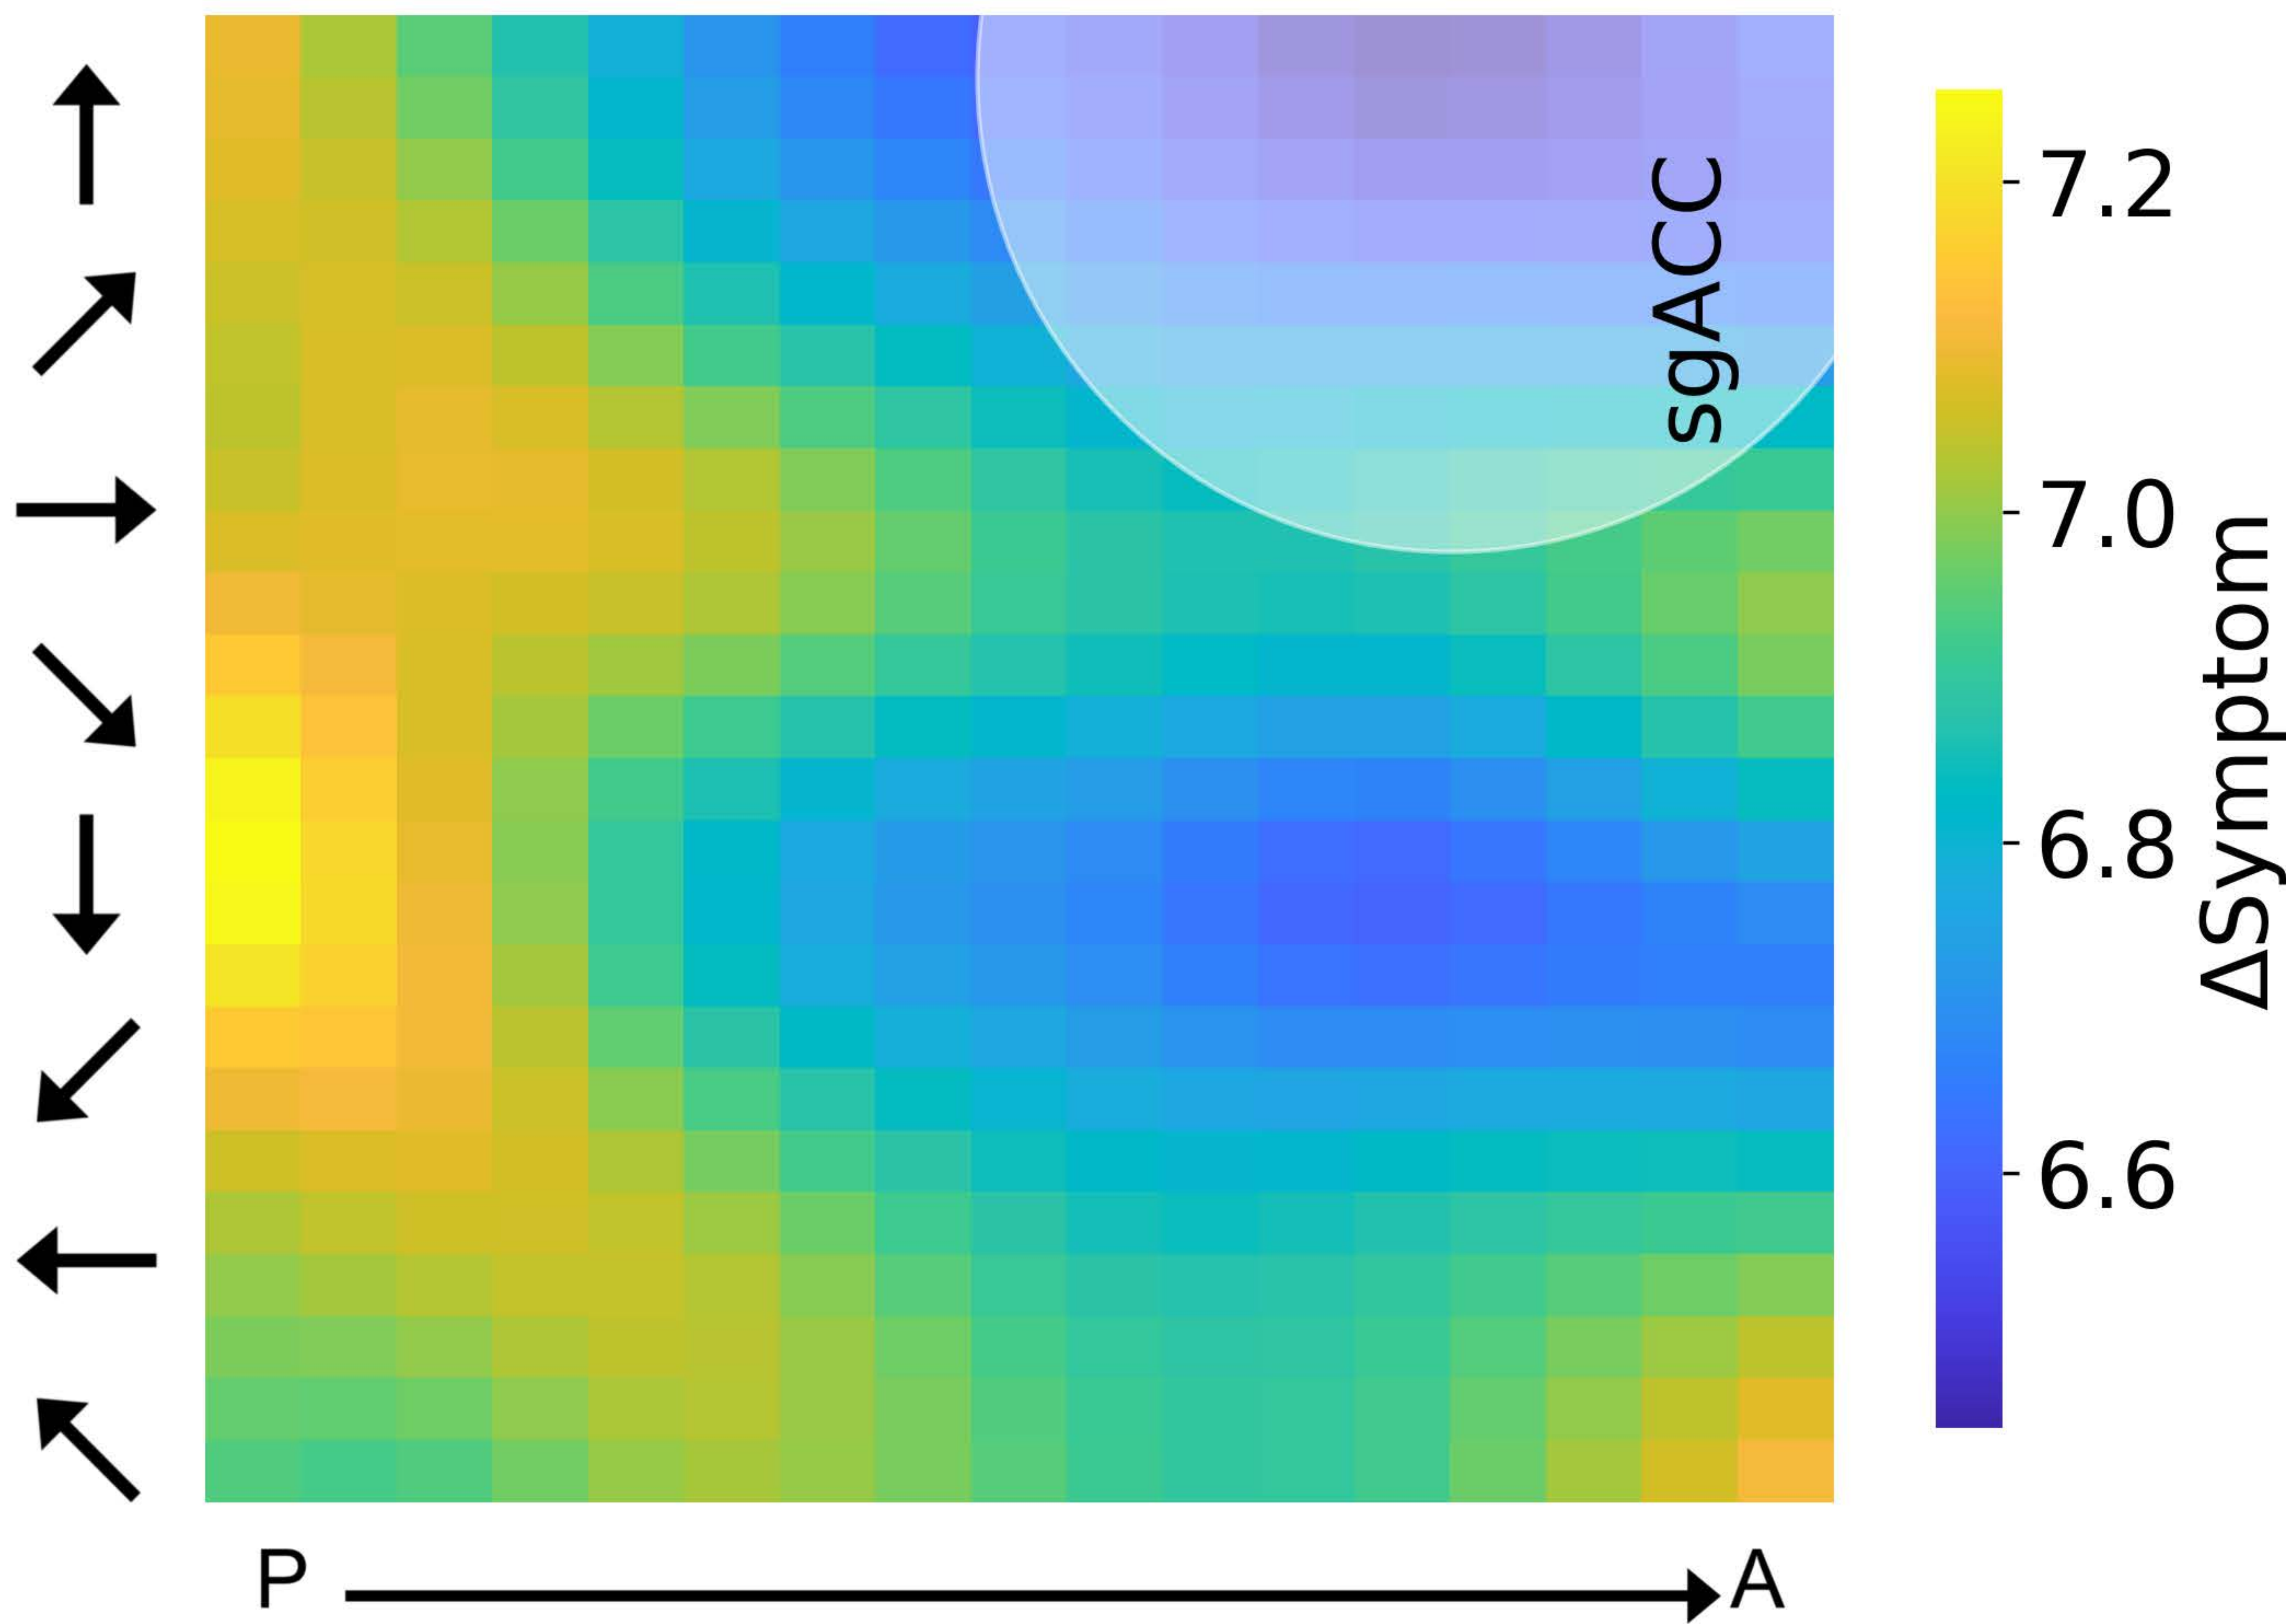



# NDARBB471NAU\_madrs\_right\_dlpfc

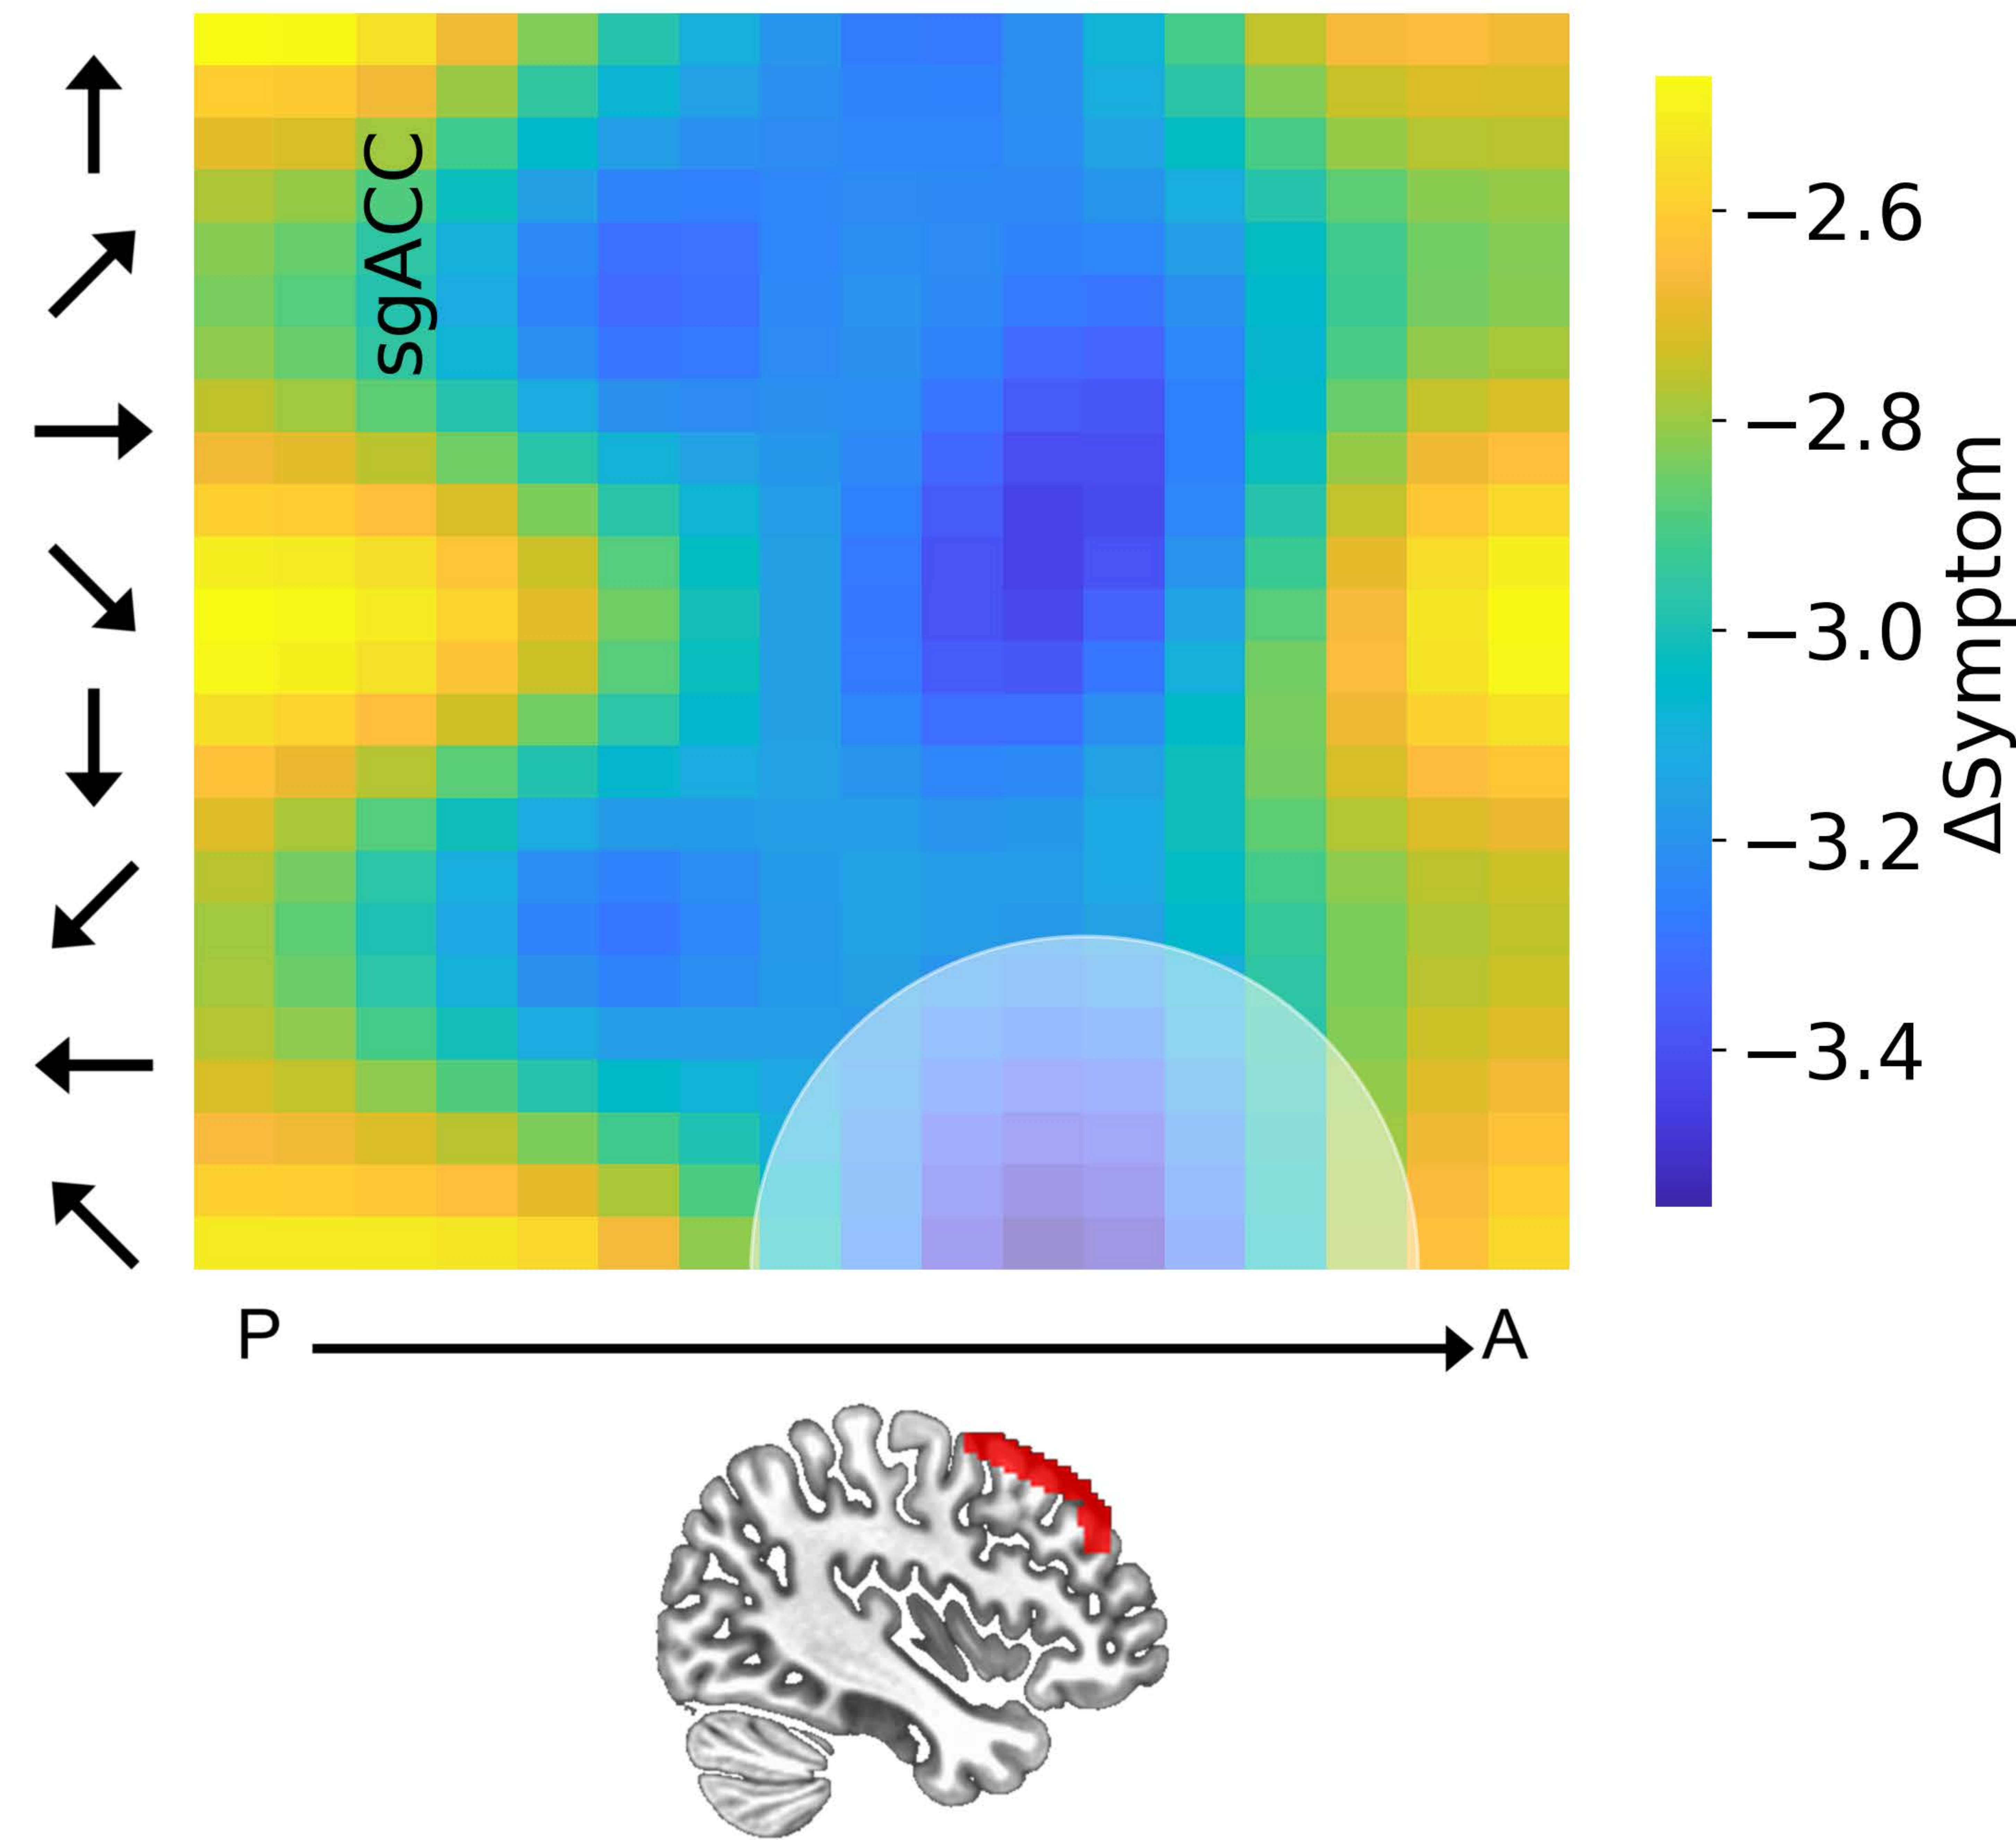



# NDARBG497RE1\_madr\_right\_dlpfc

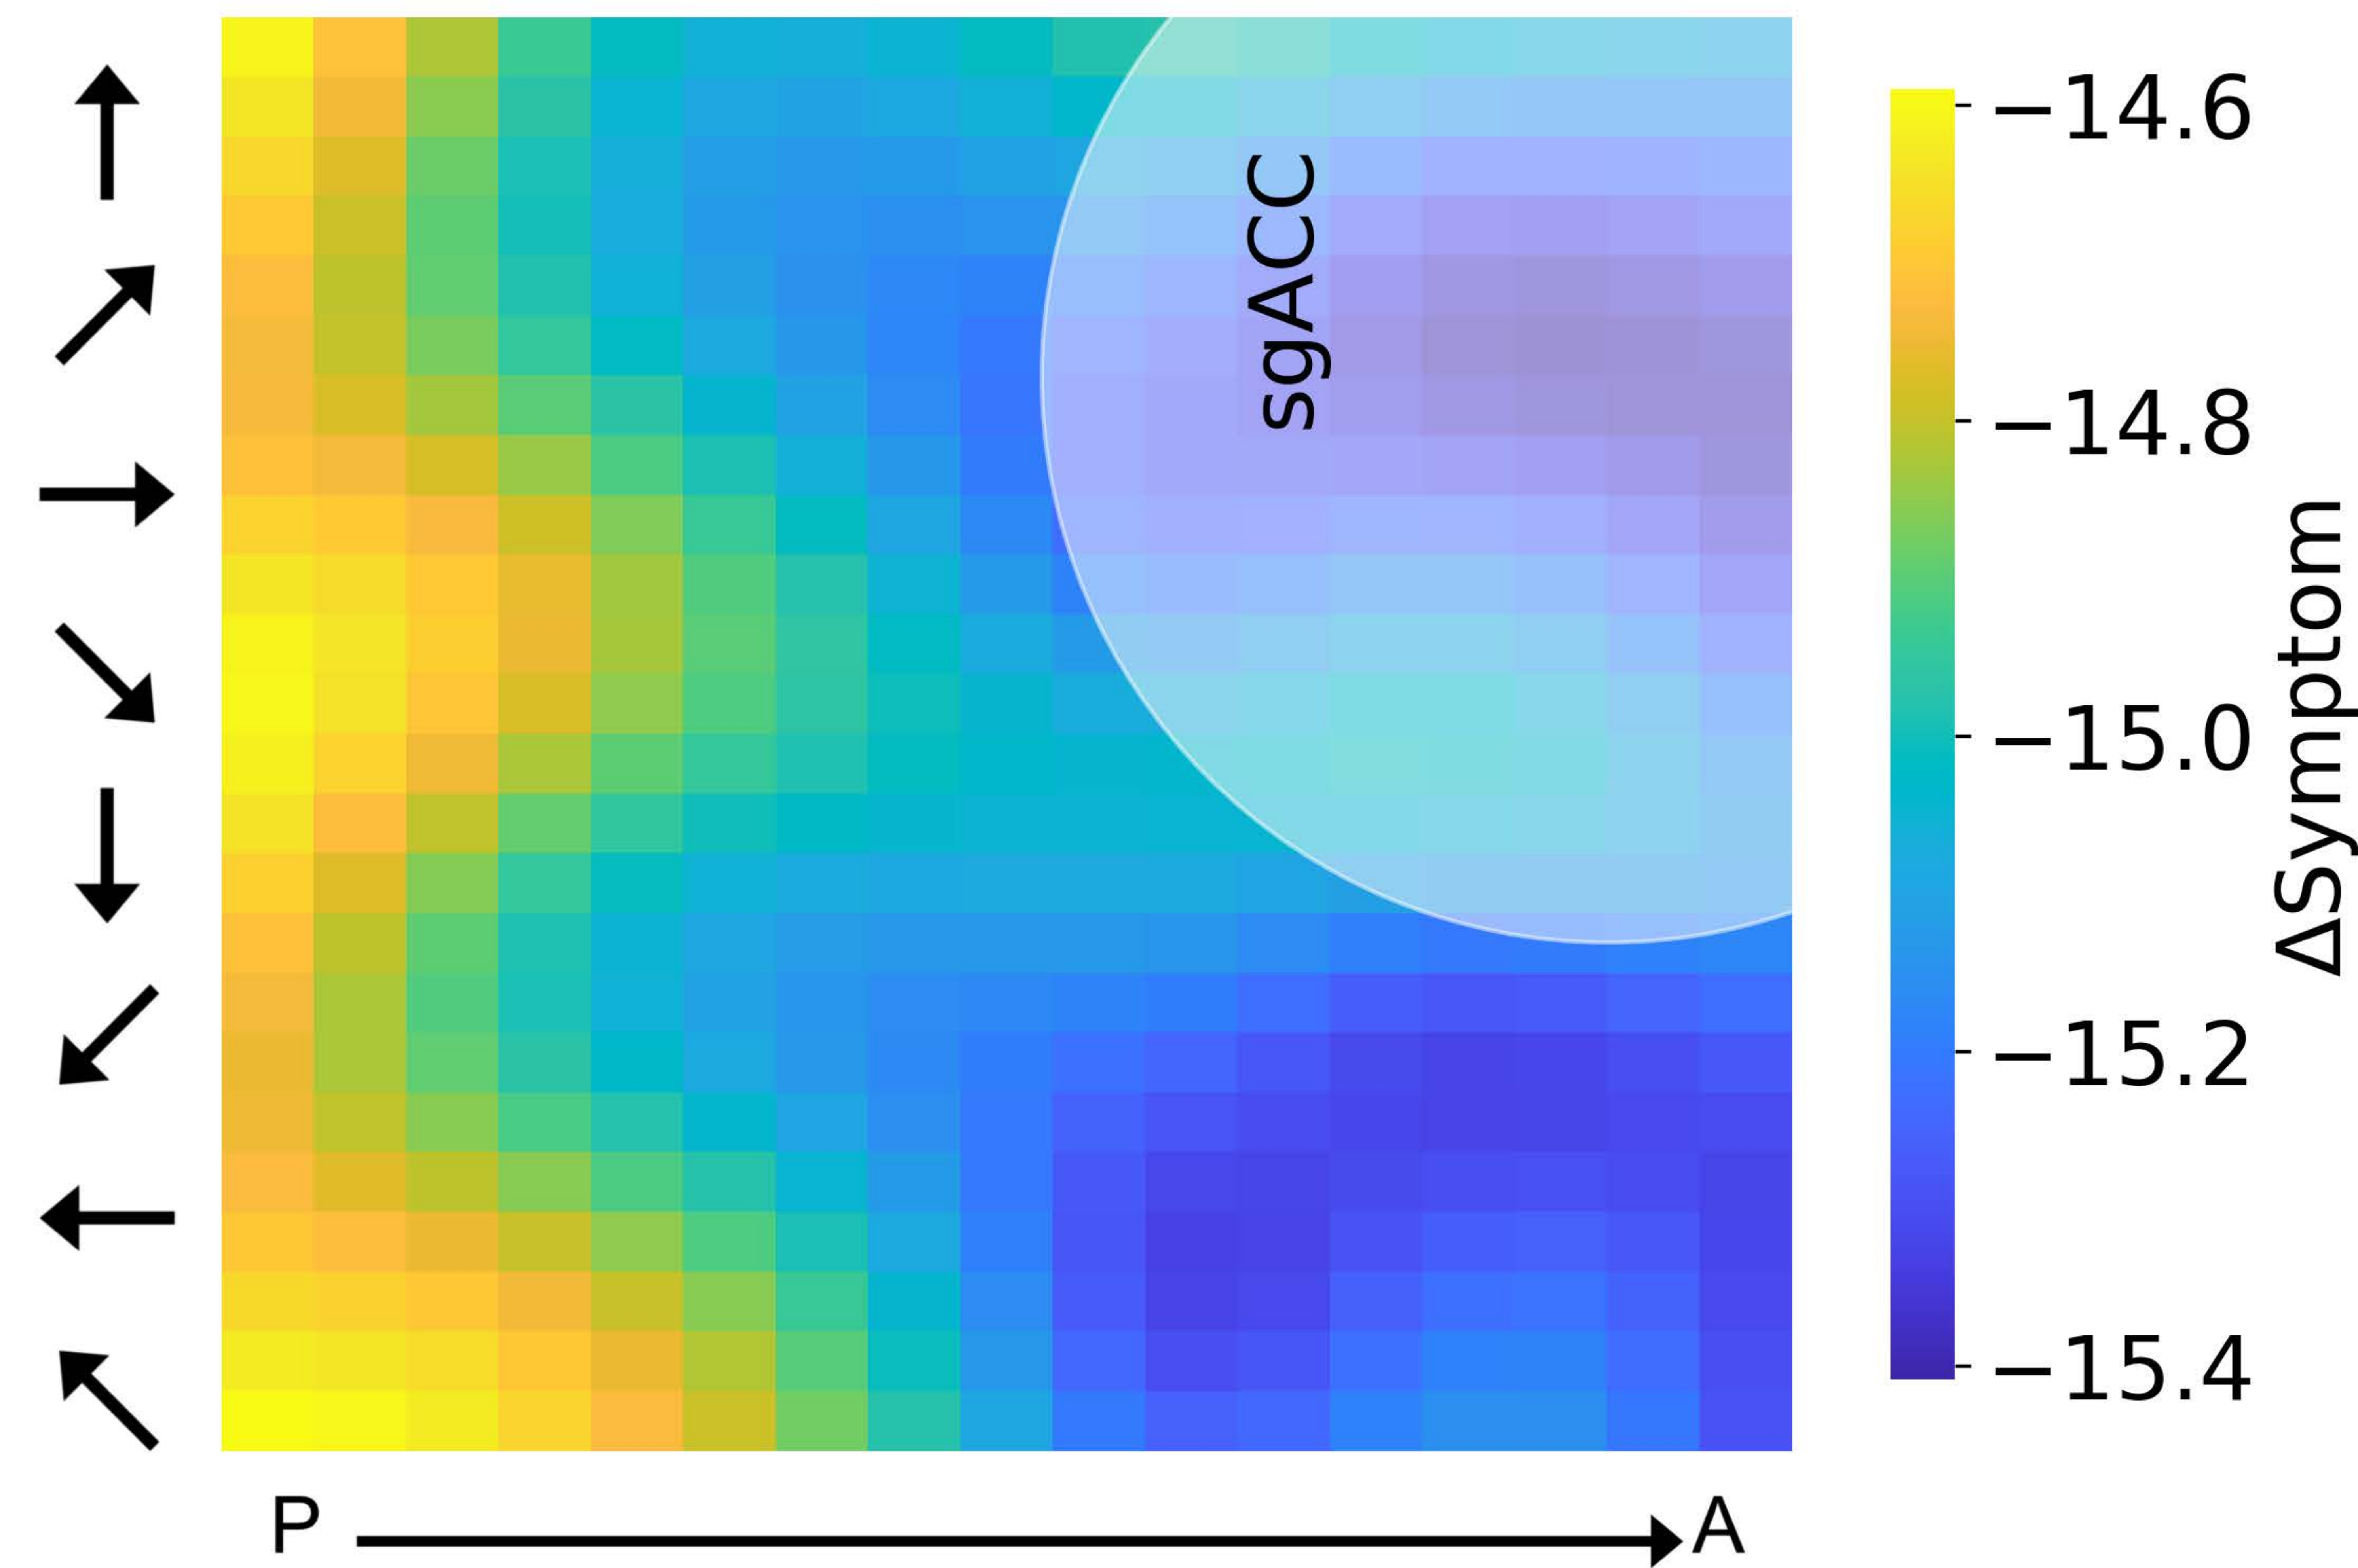



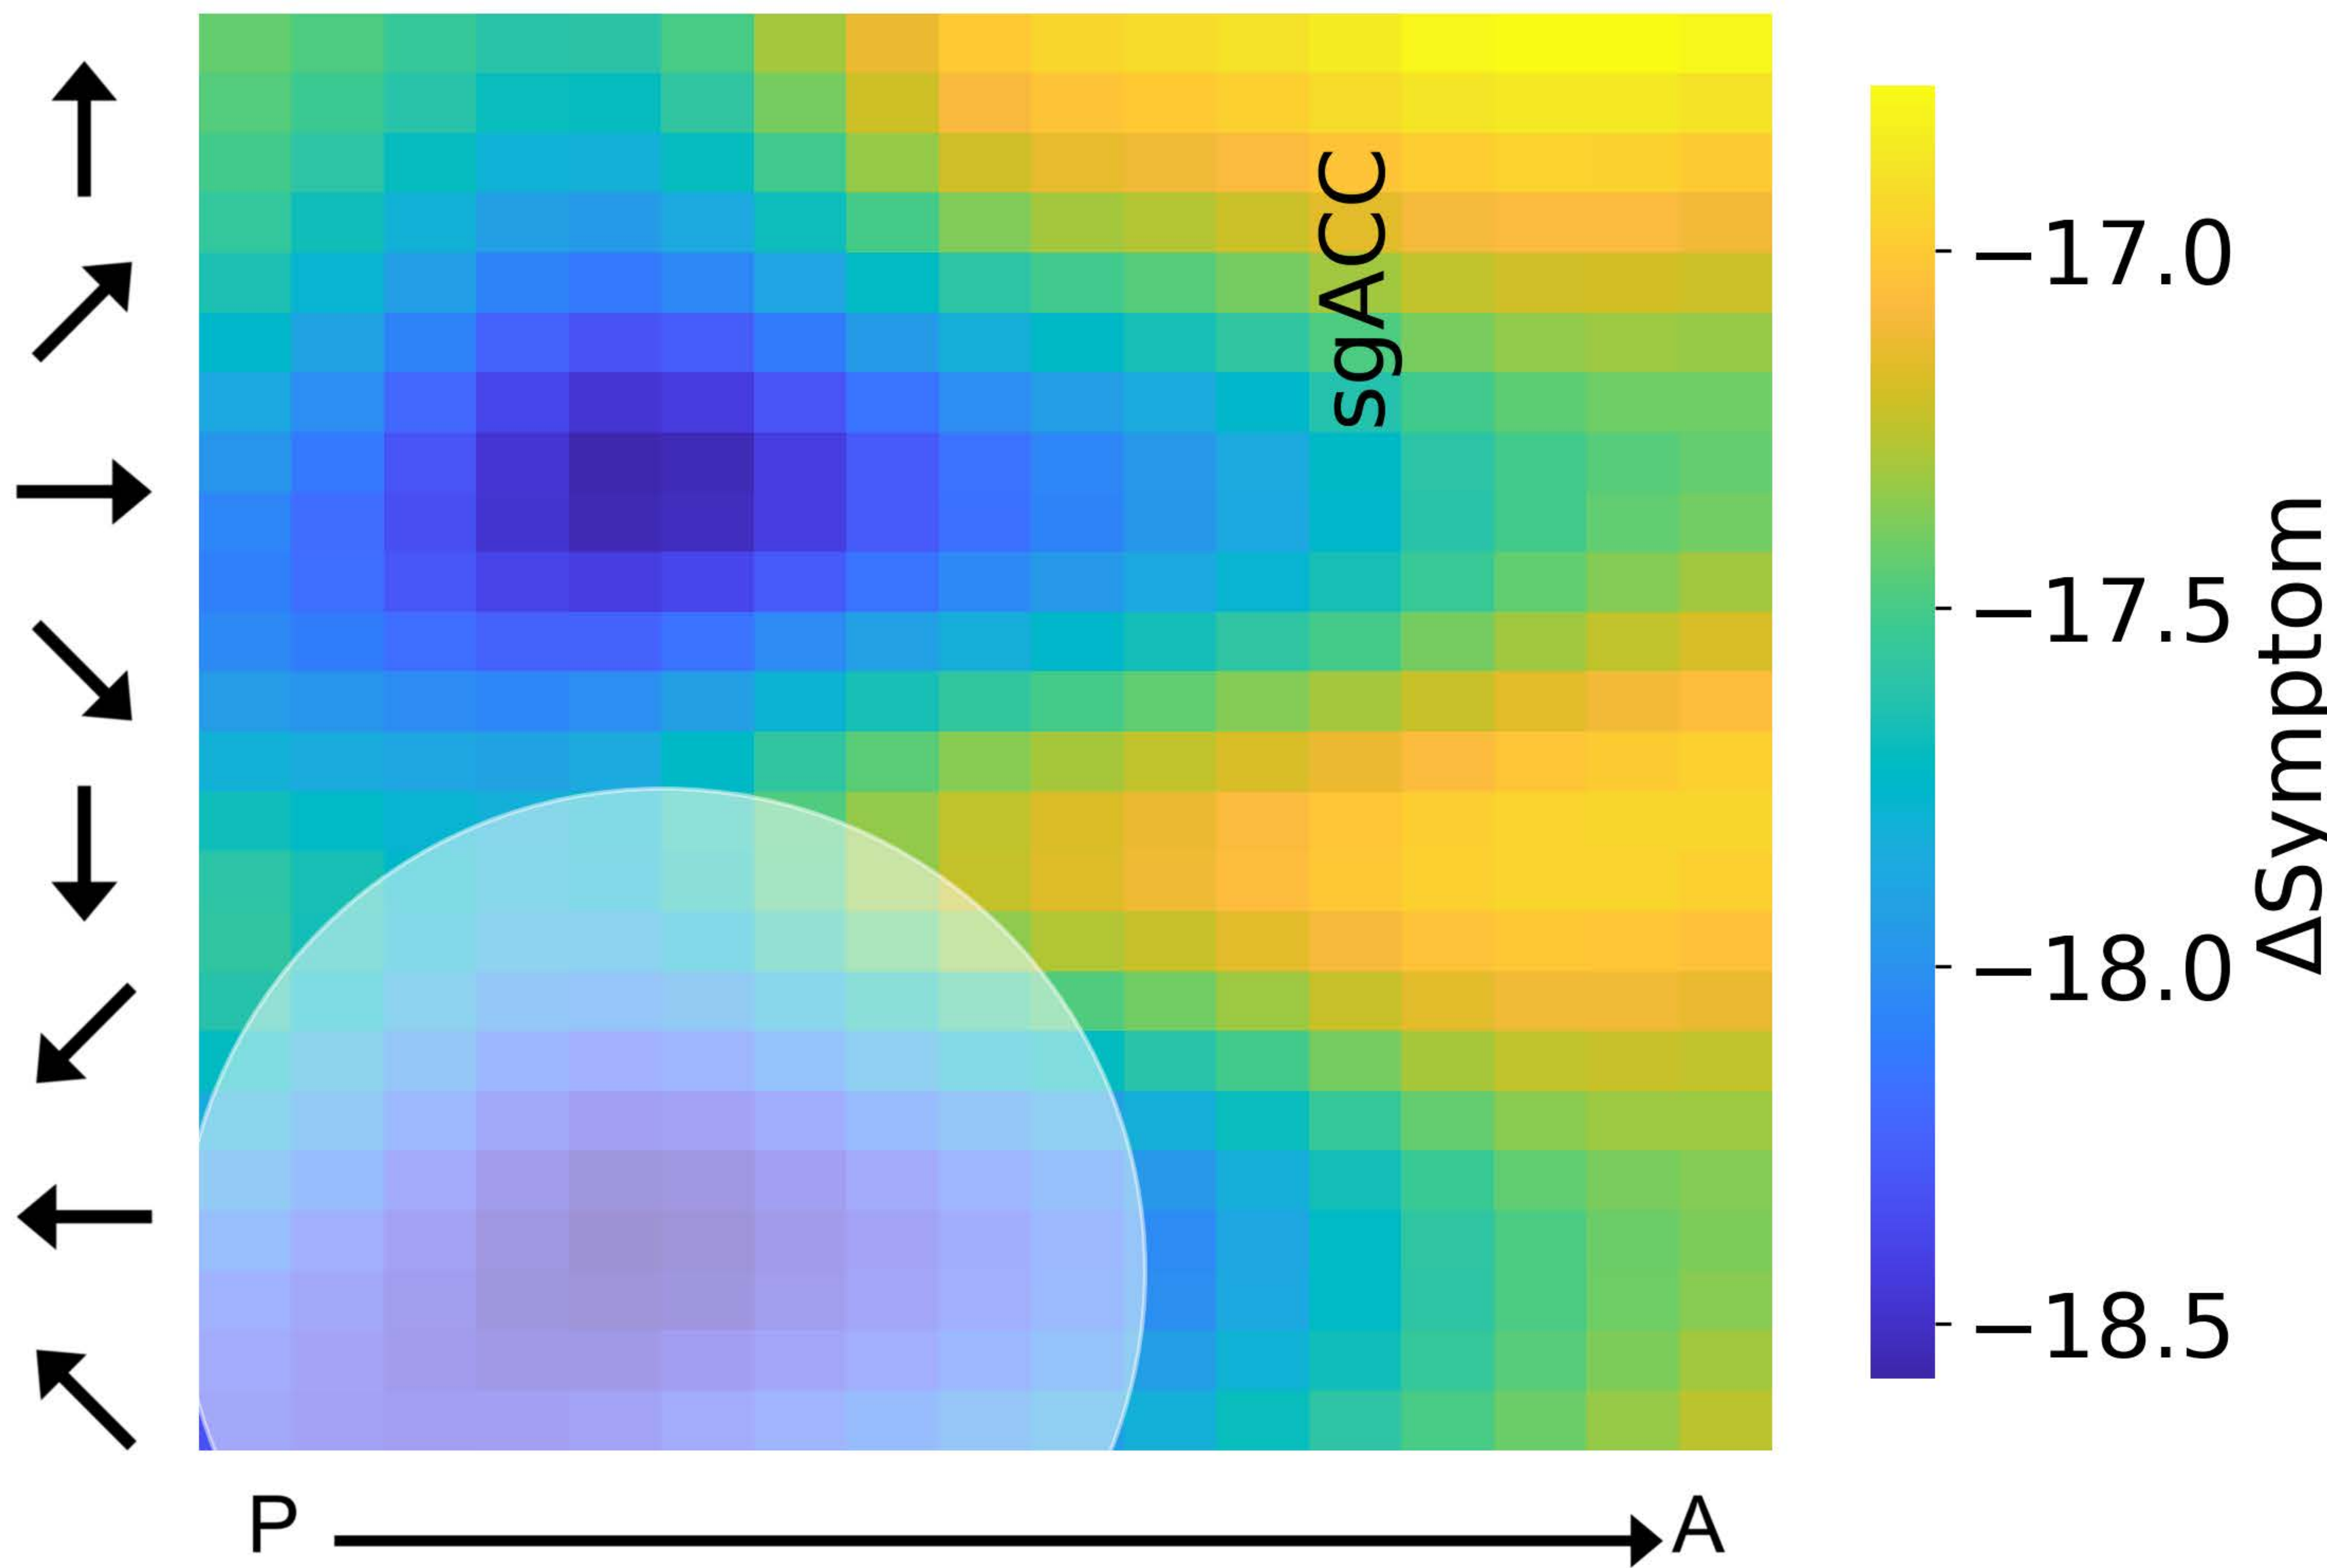



# NDARBL814BJK\_madrs\_right\_dlpfc

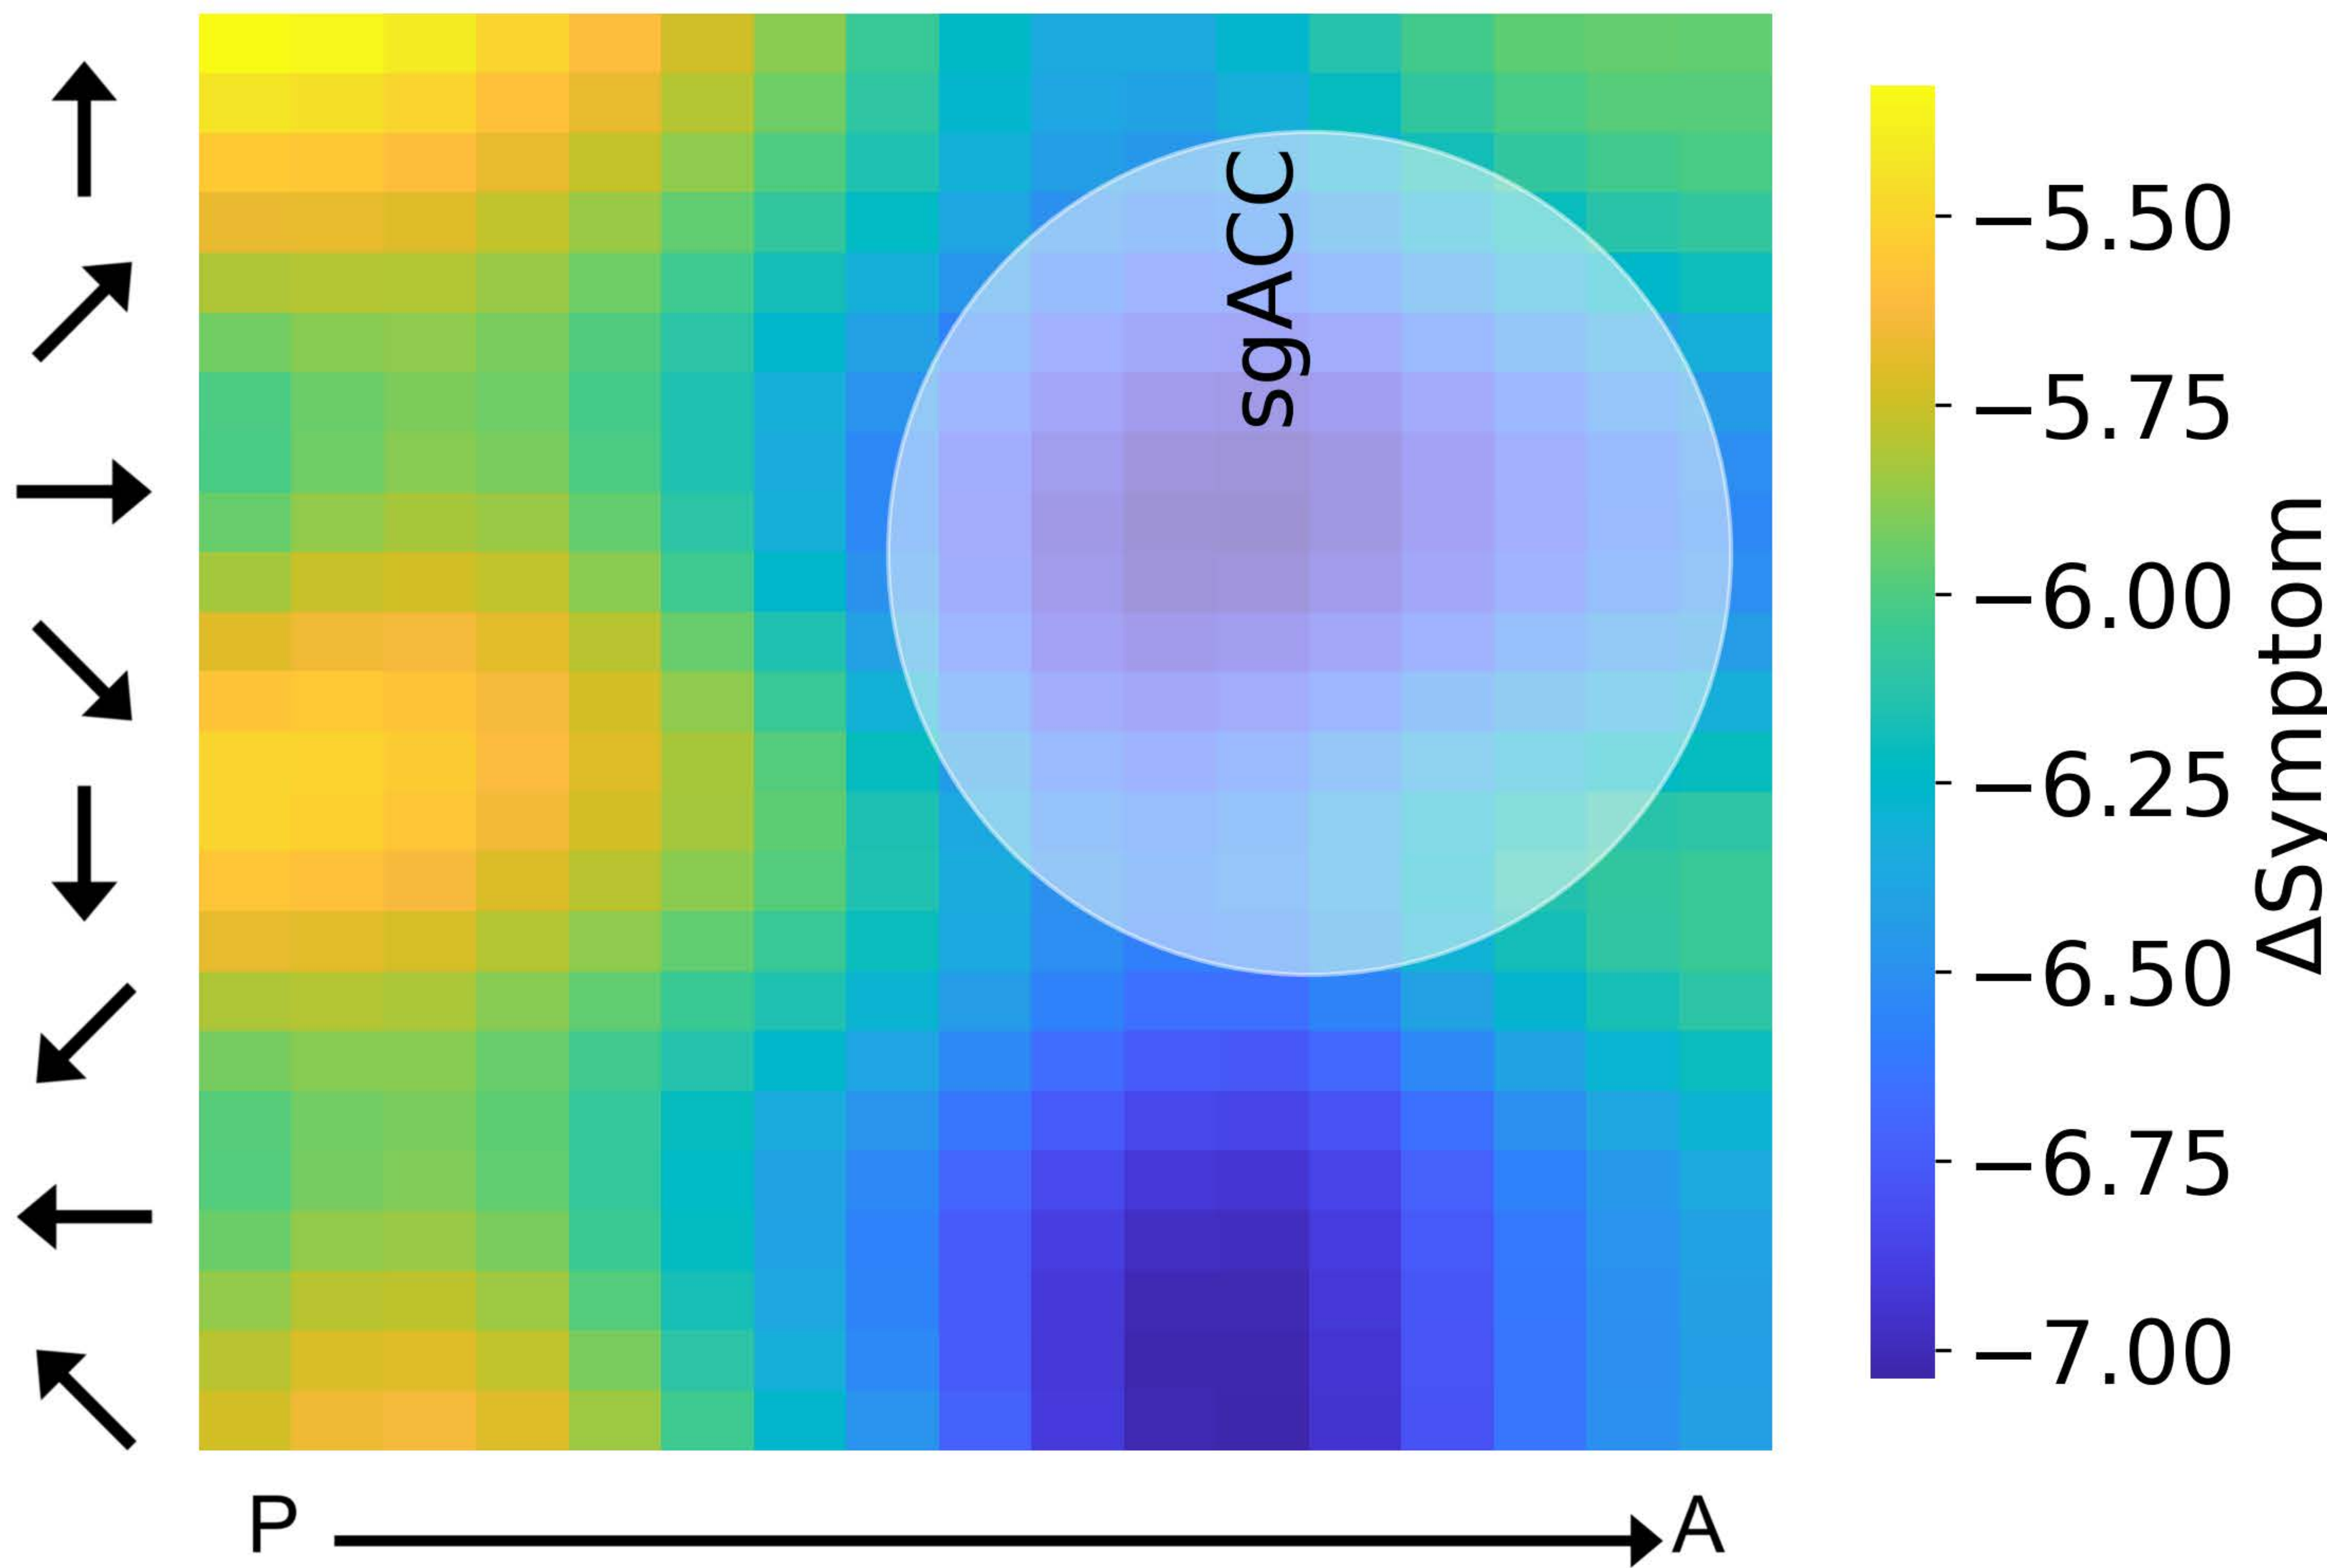



# NDARBP353XD2\_madrs\_right\_dlpfc

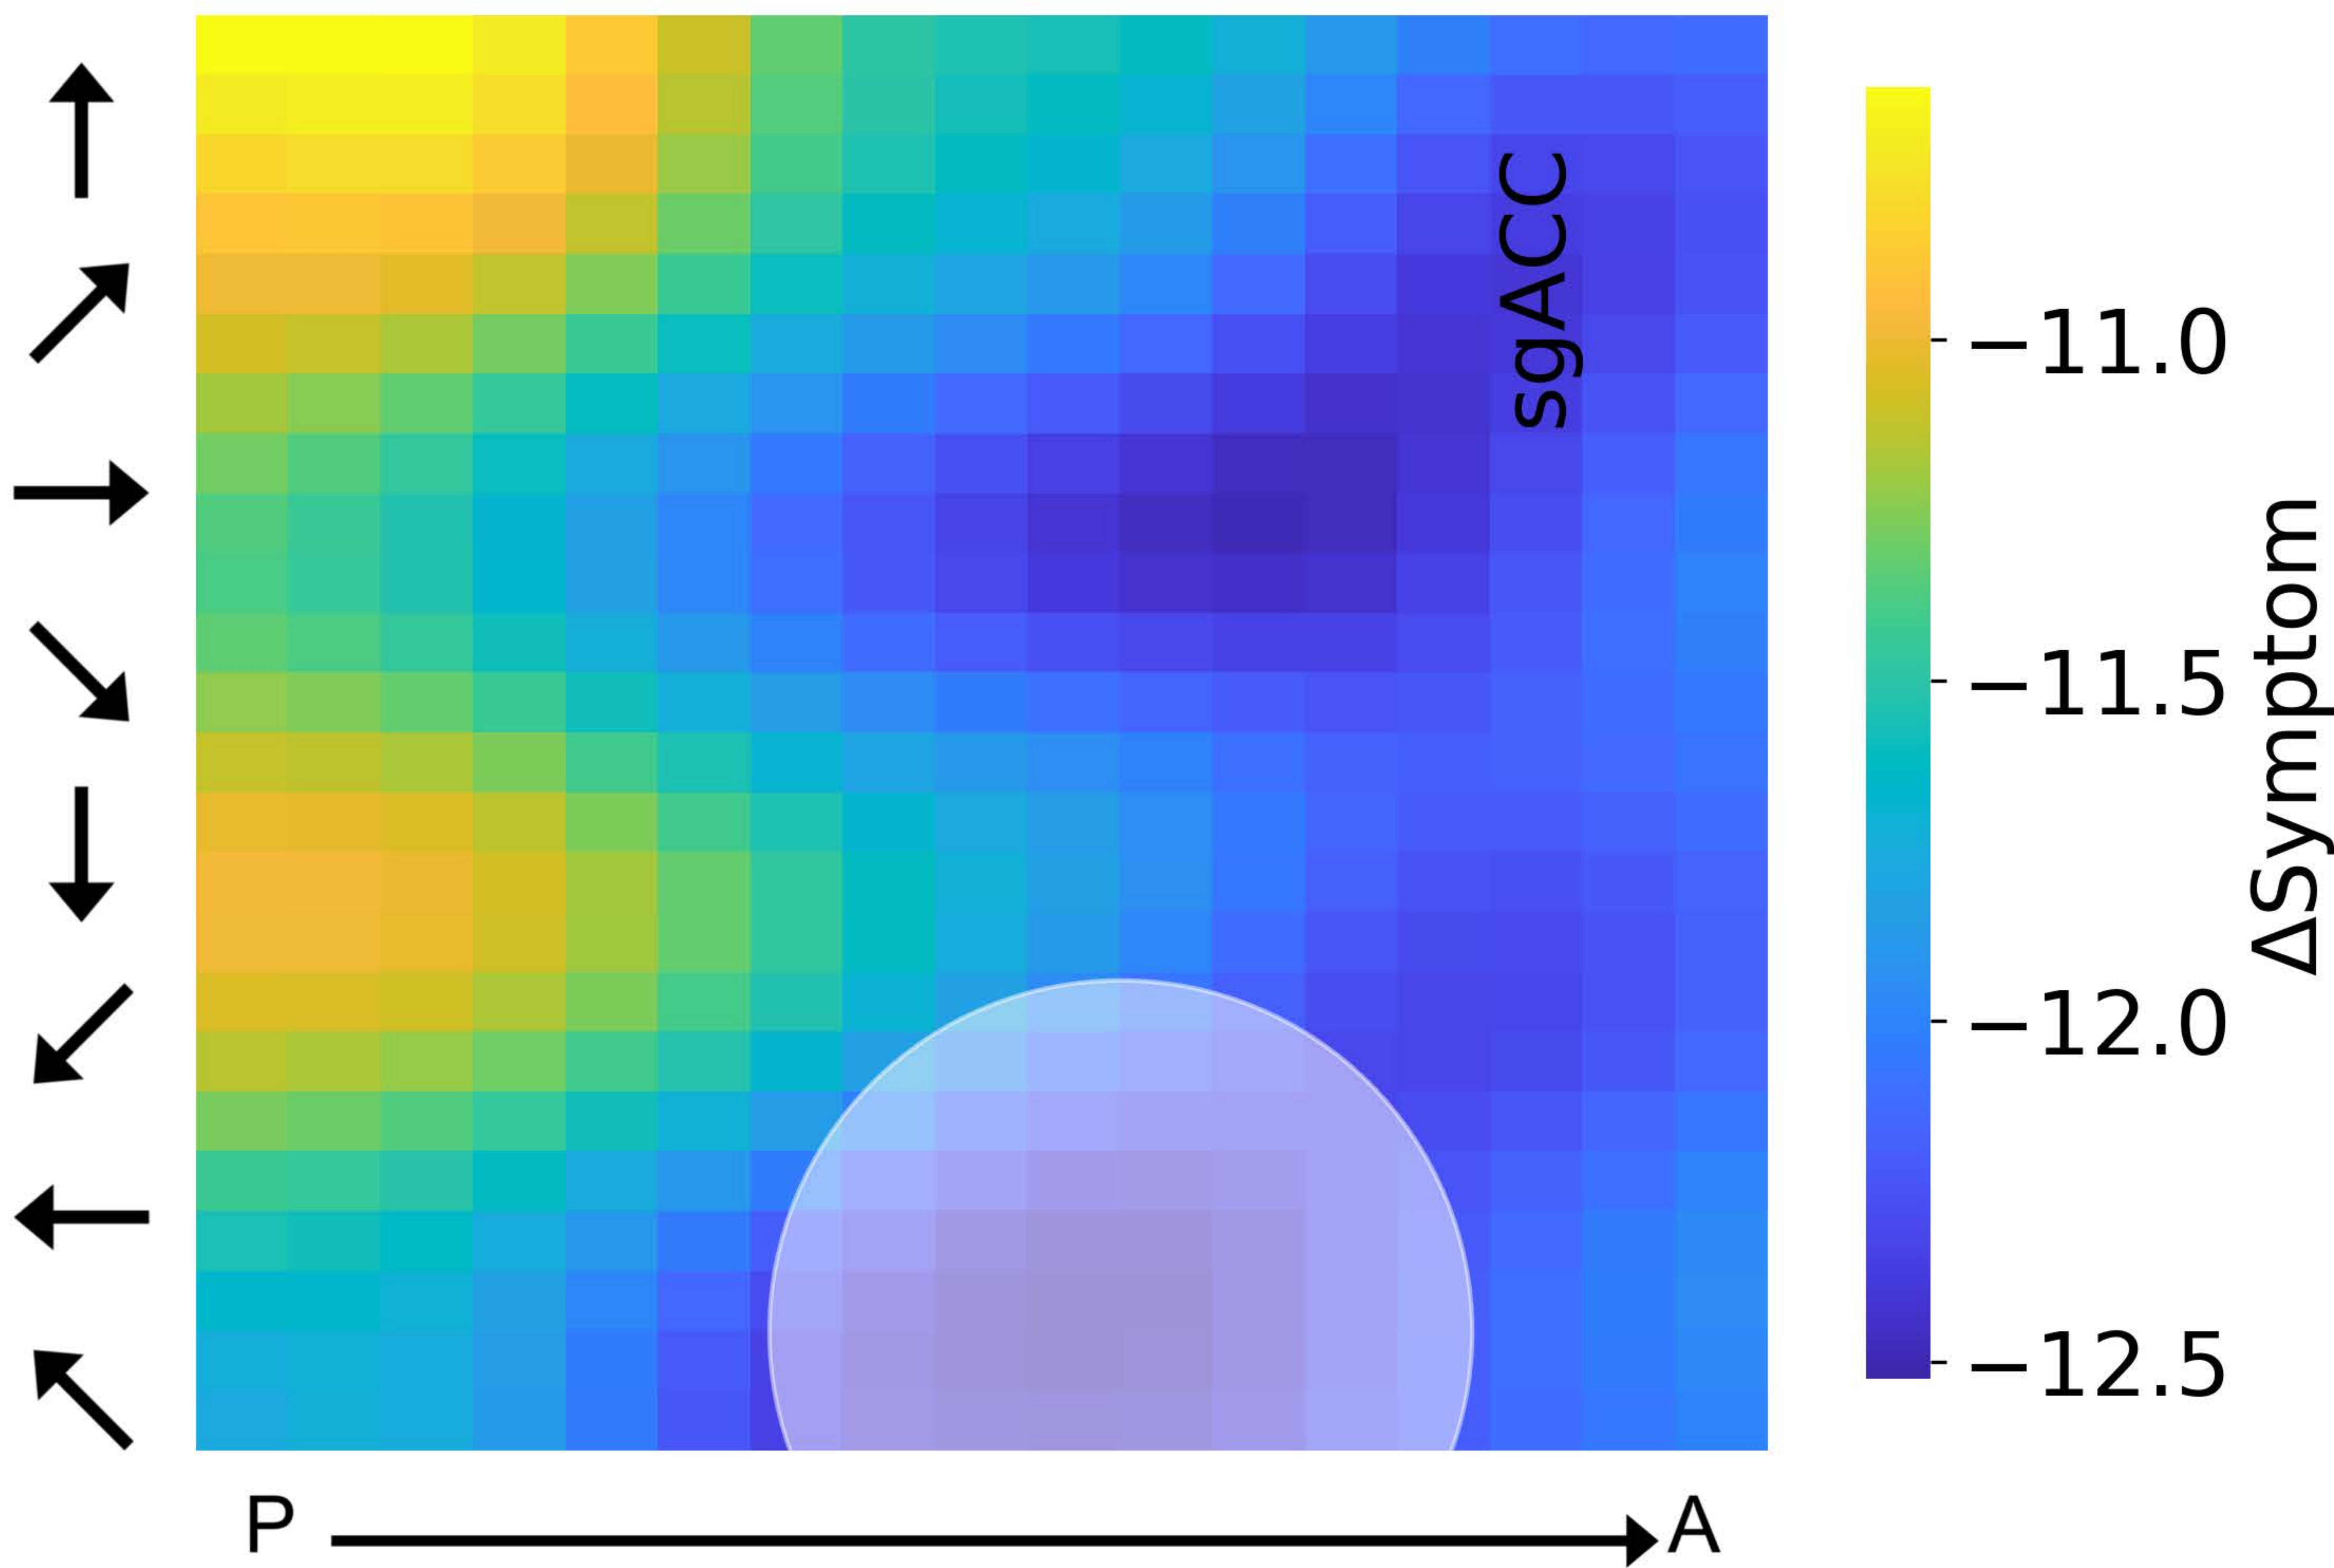



# NDARBT583XH6\_madrs\_right\_dlpfc

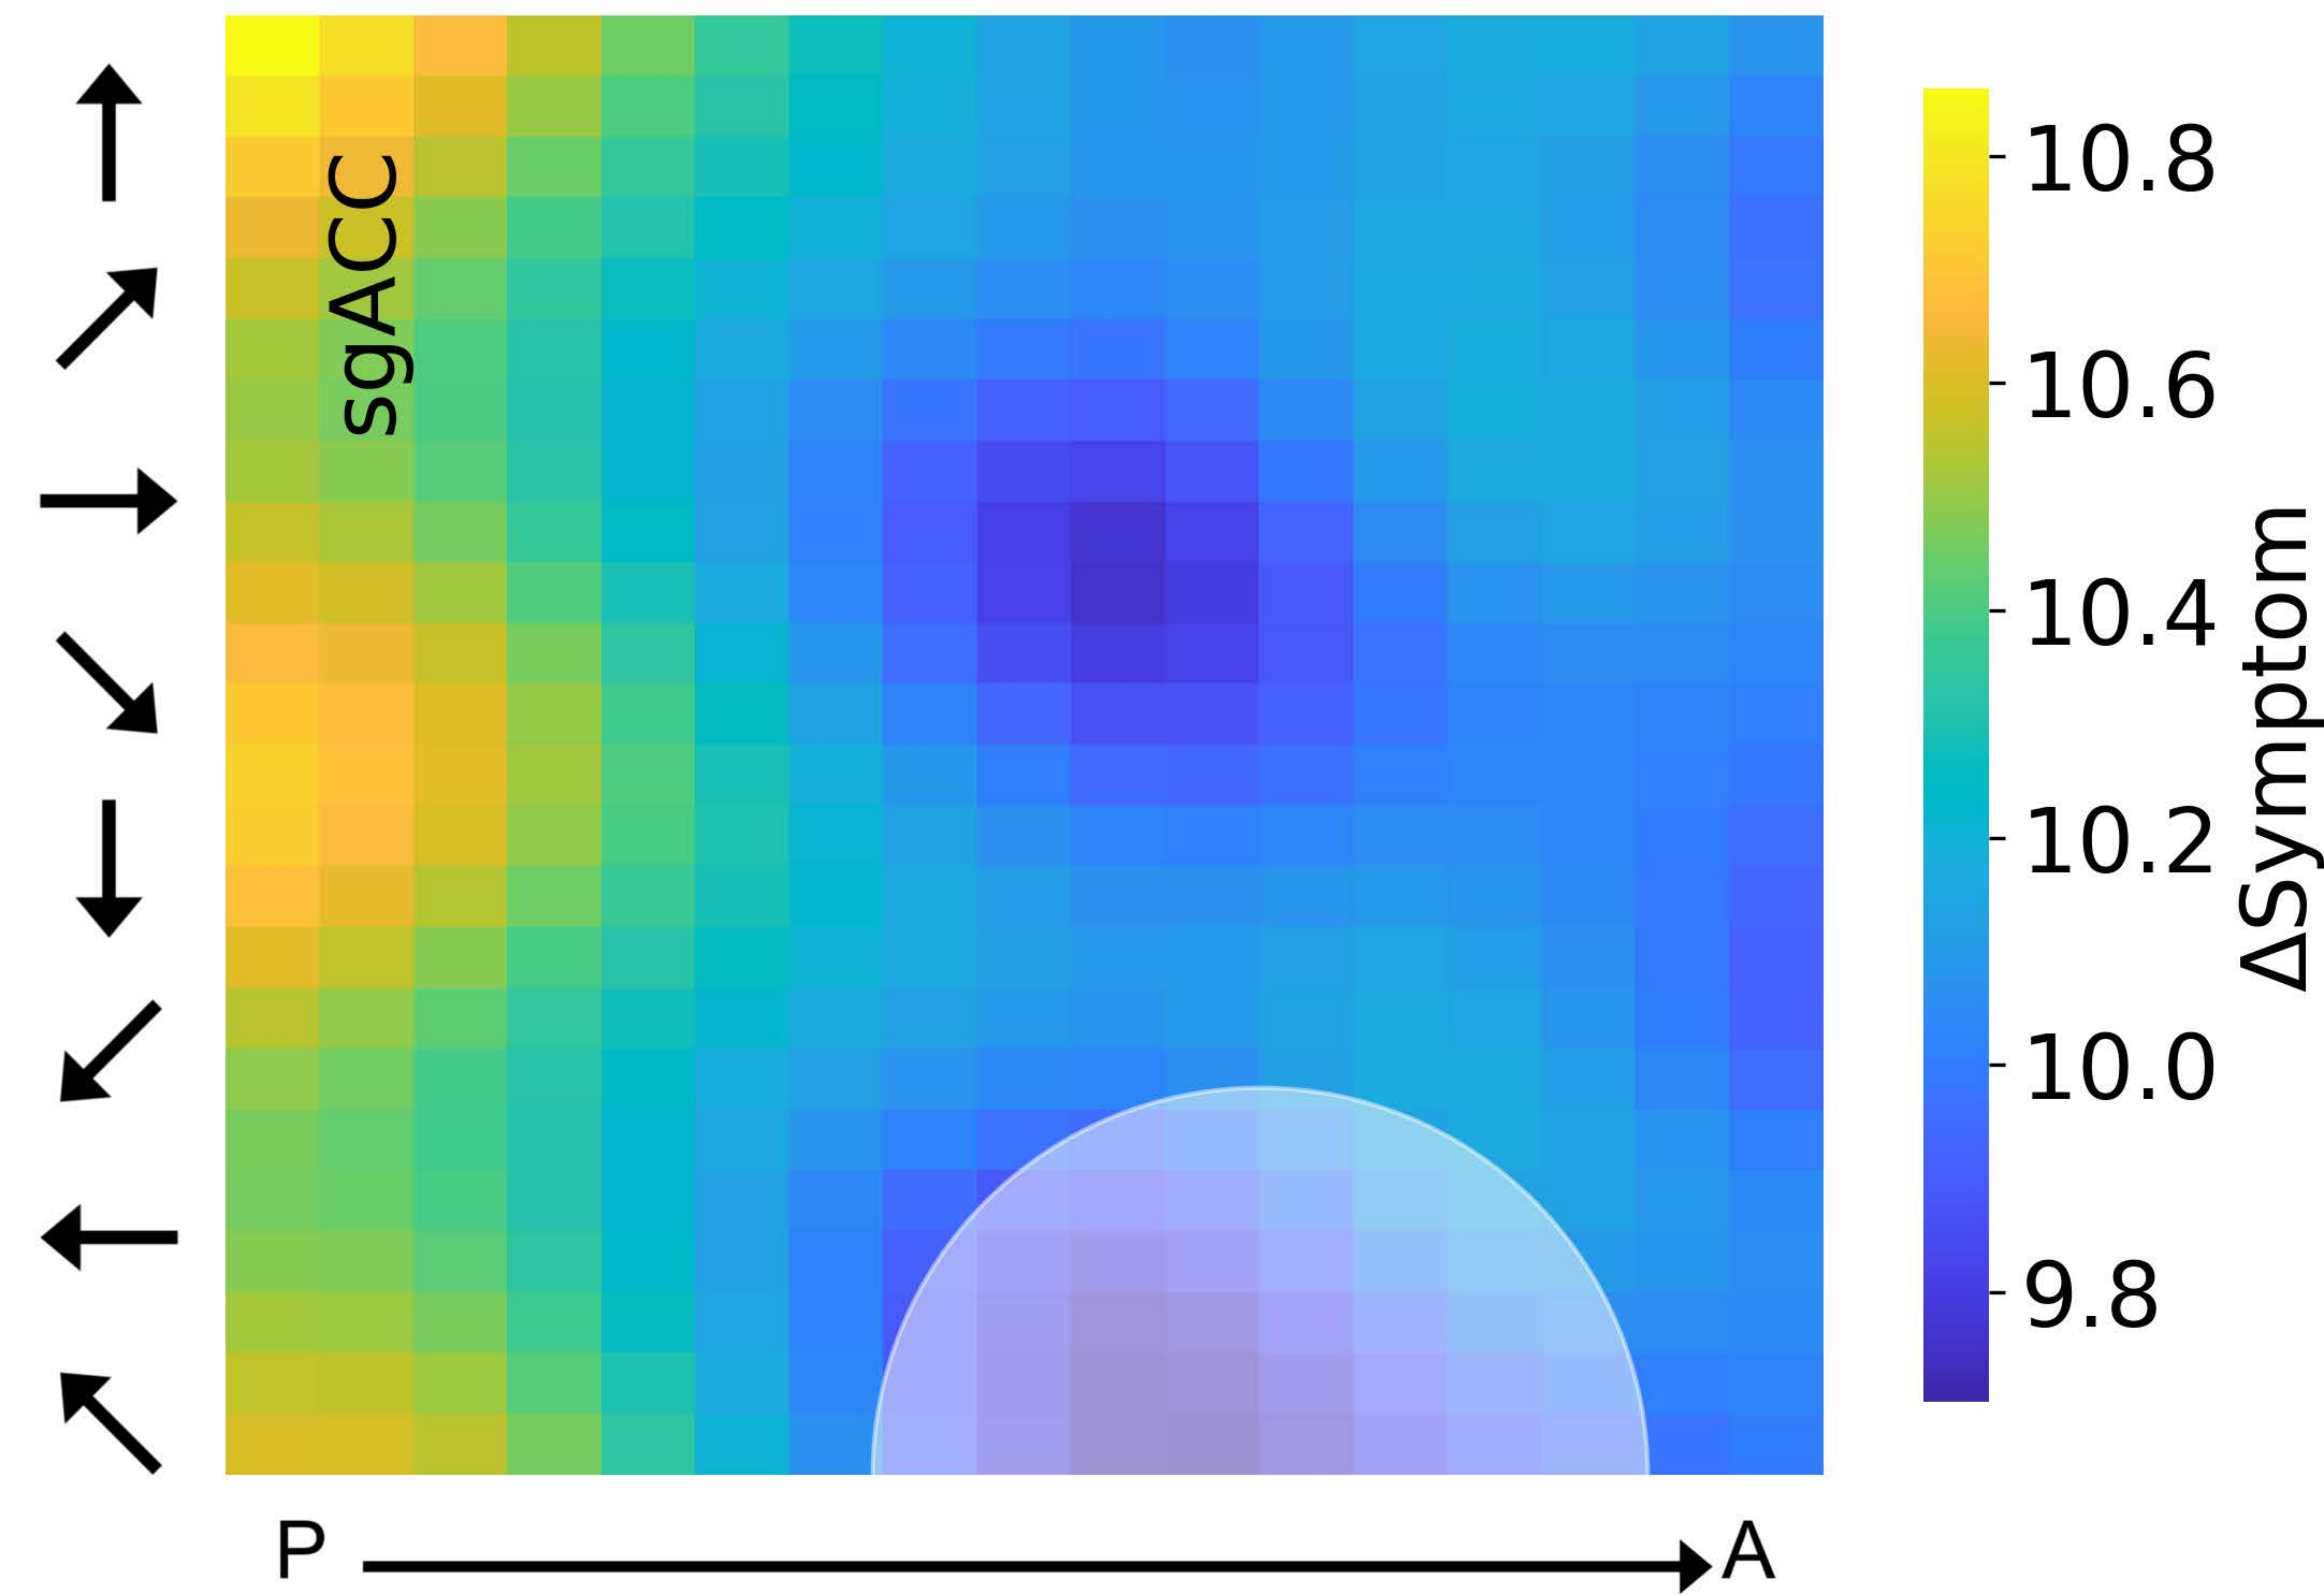



# NDARCG071YN8\_madr\_right\_dlpfc

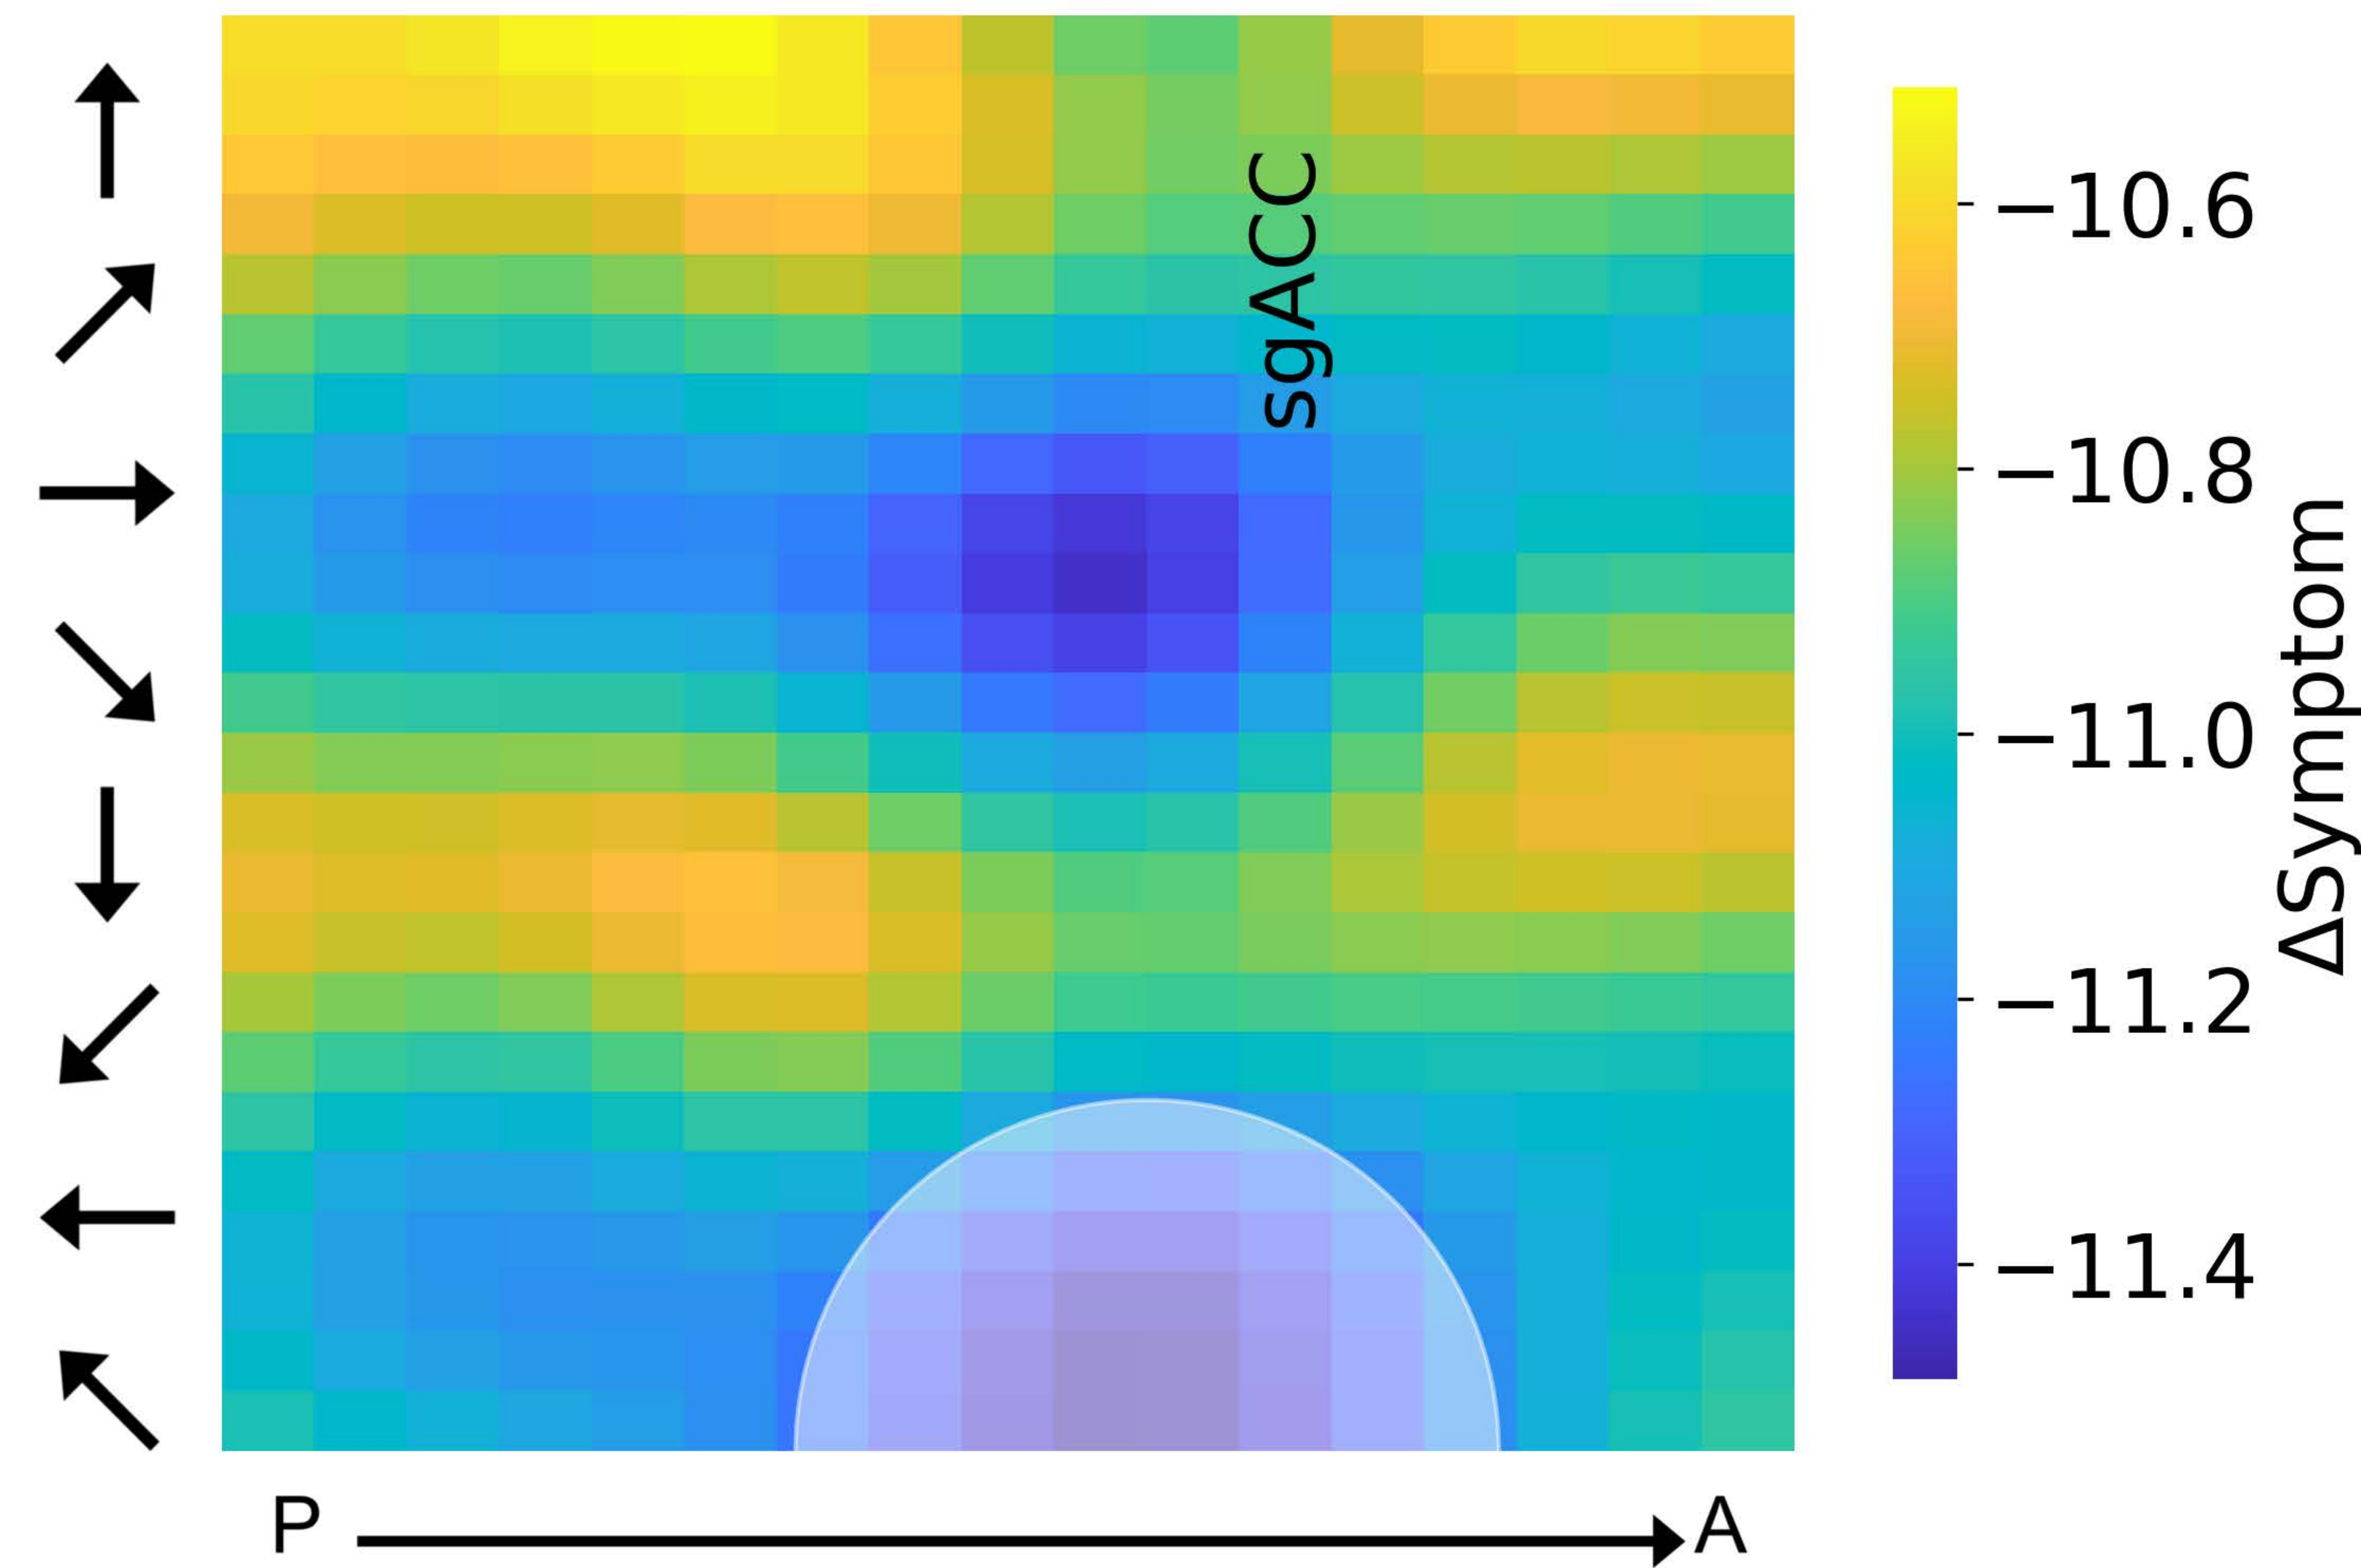



# INDARCG271VGC\_madrs\_right\_dlpfc

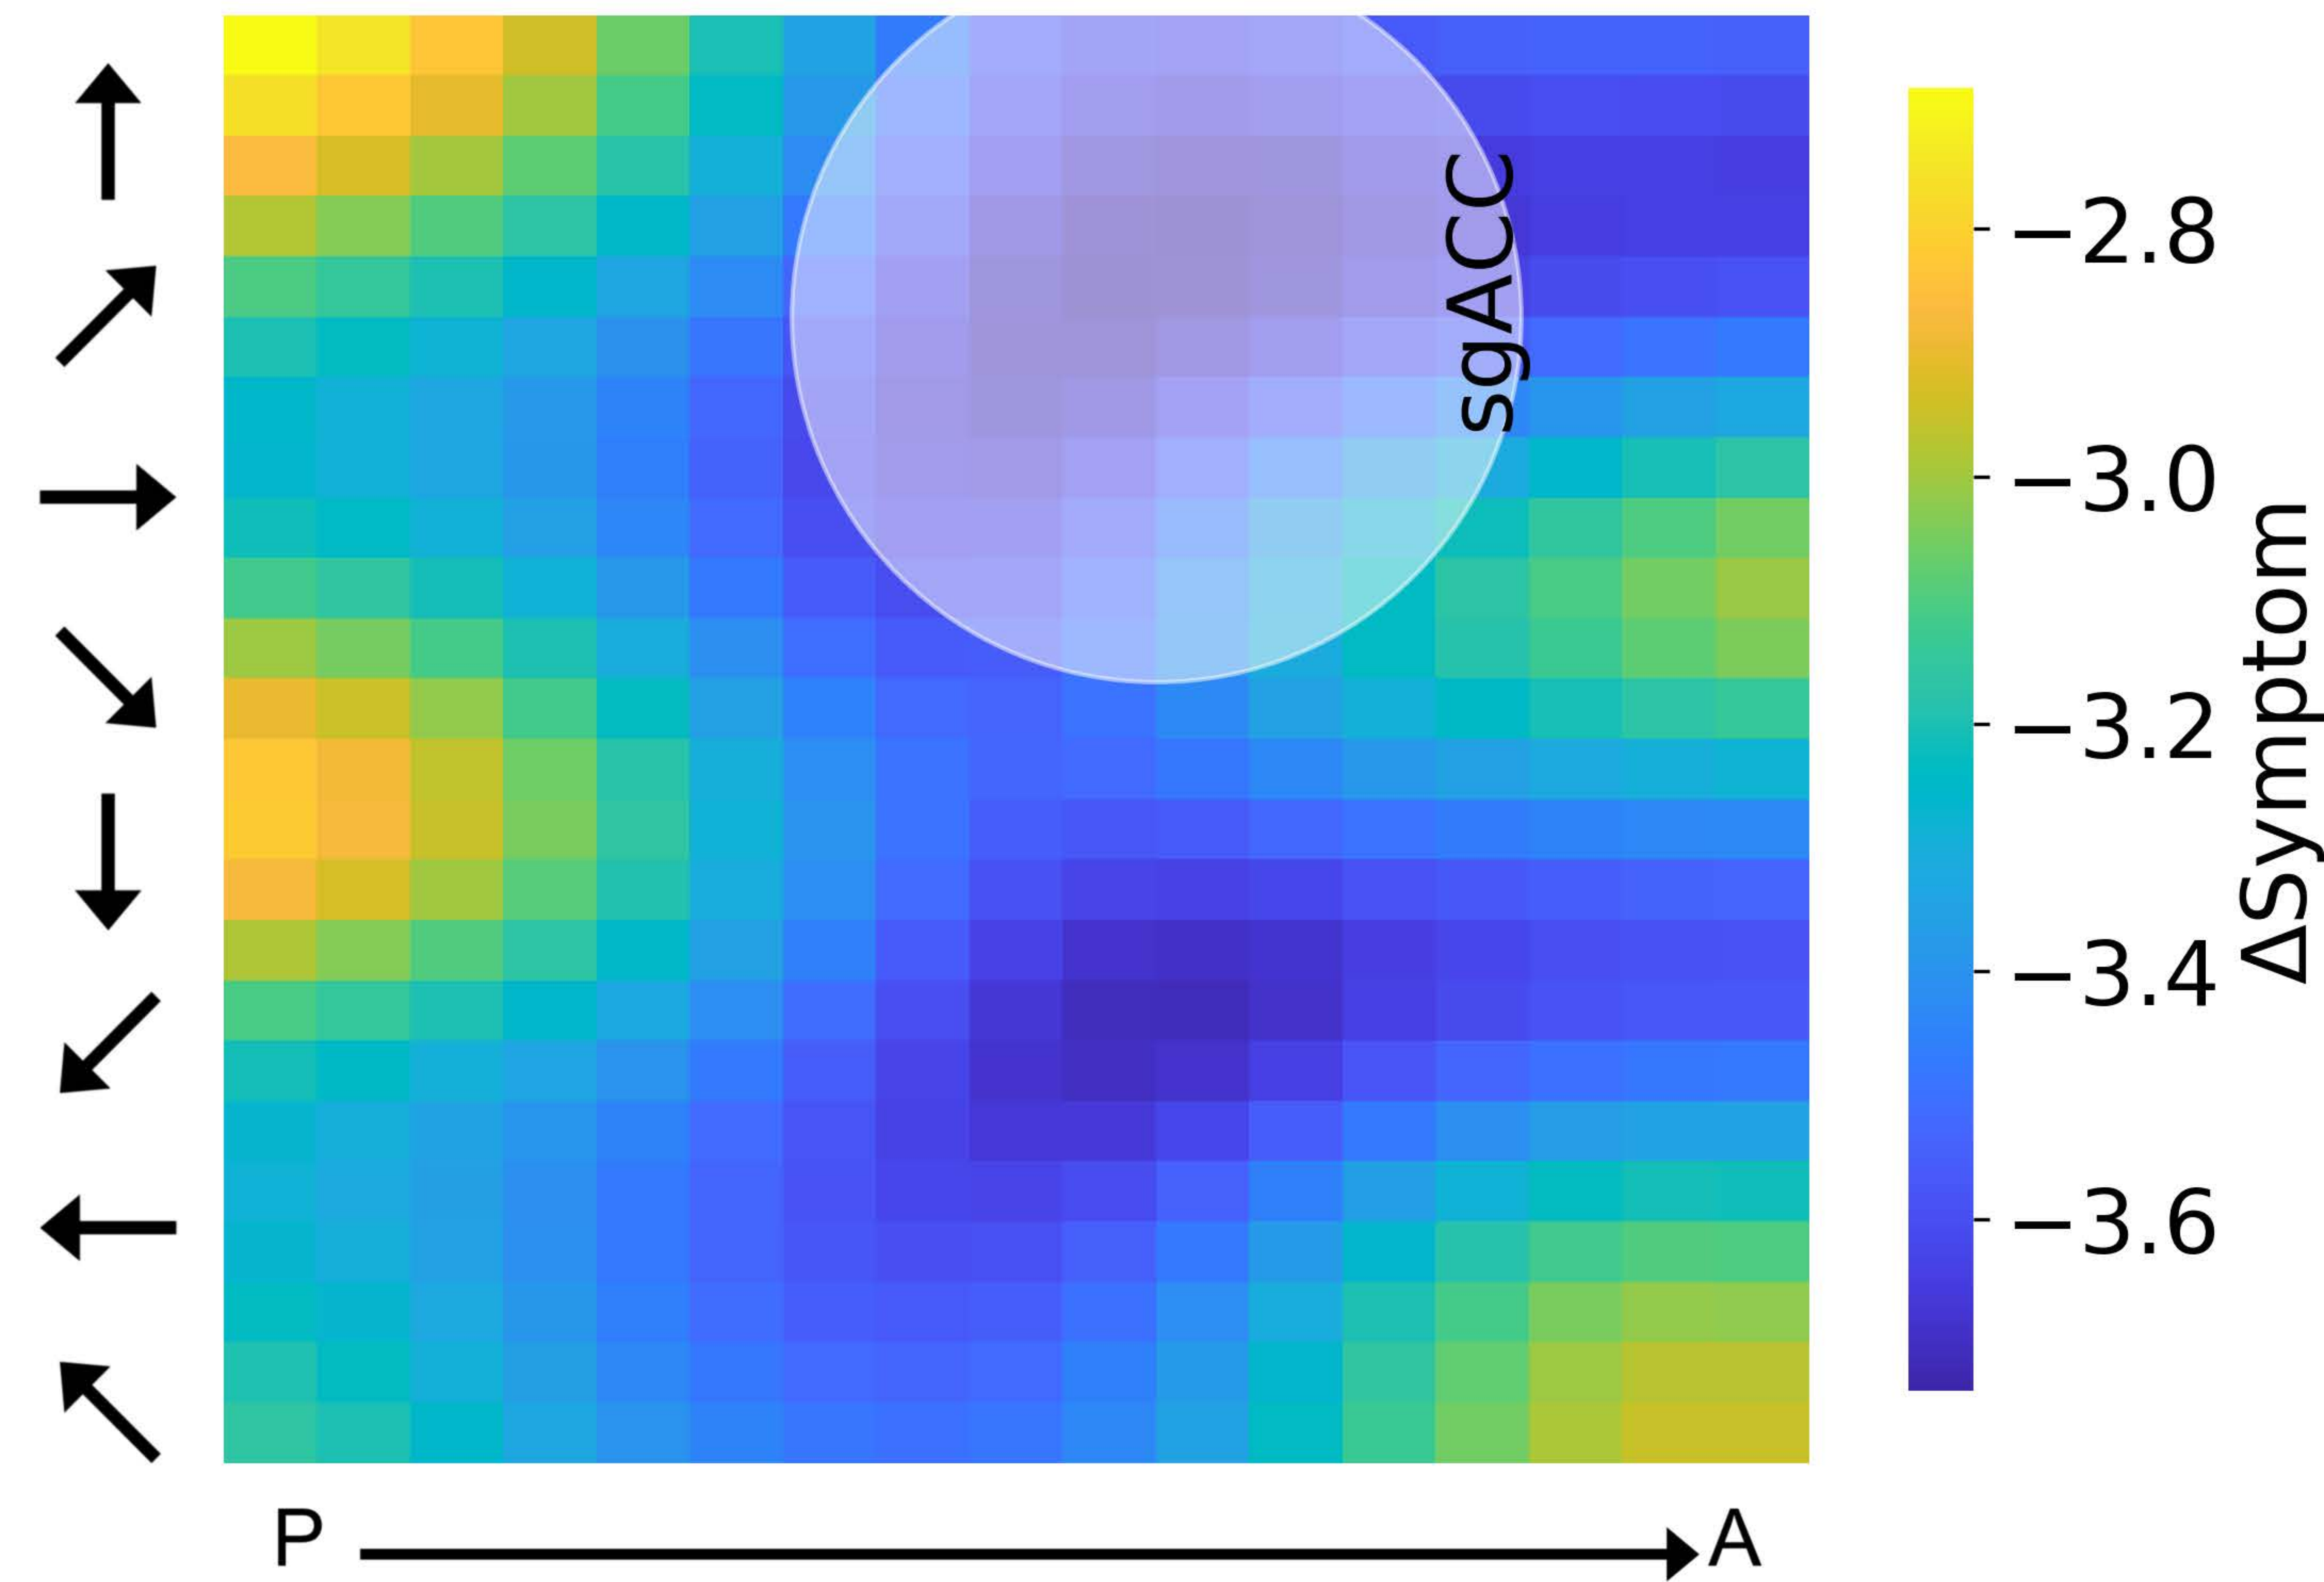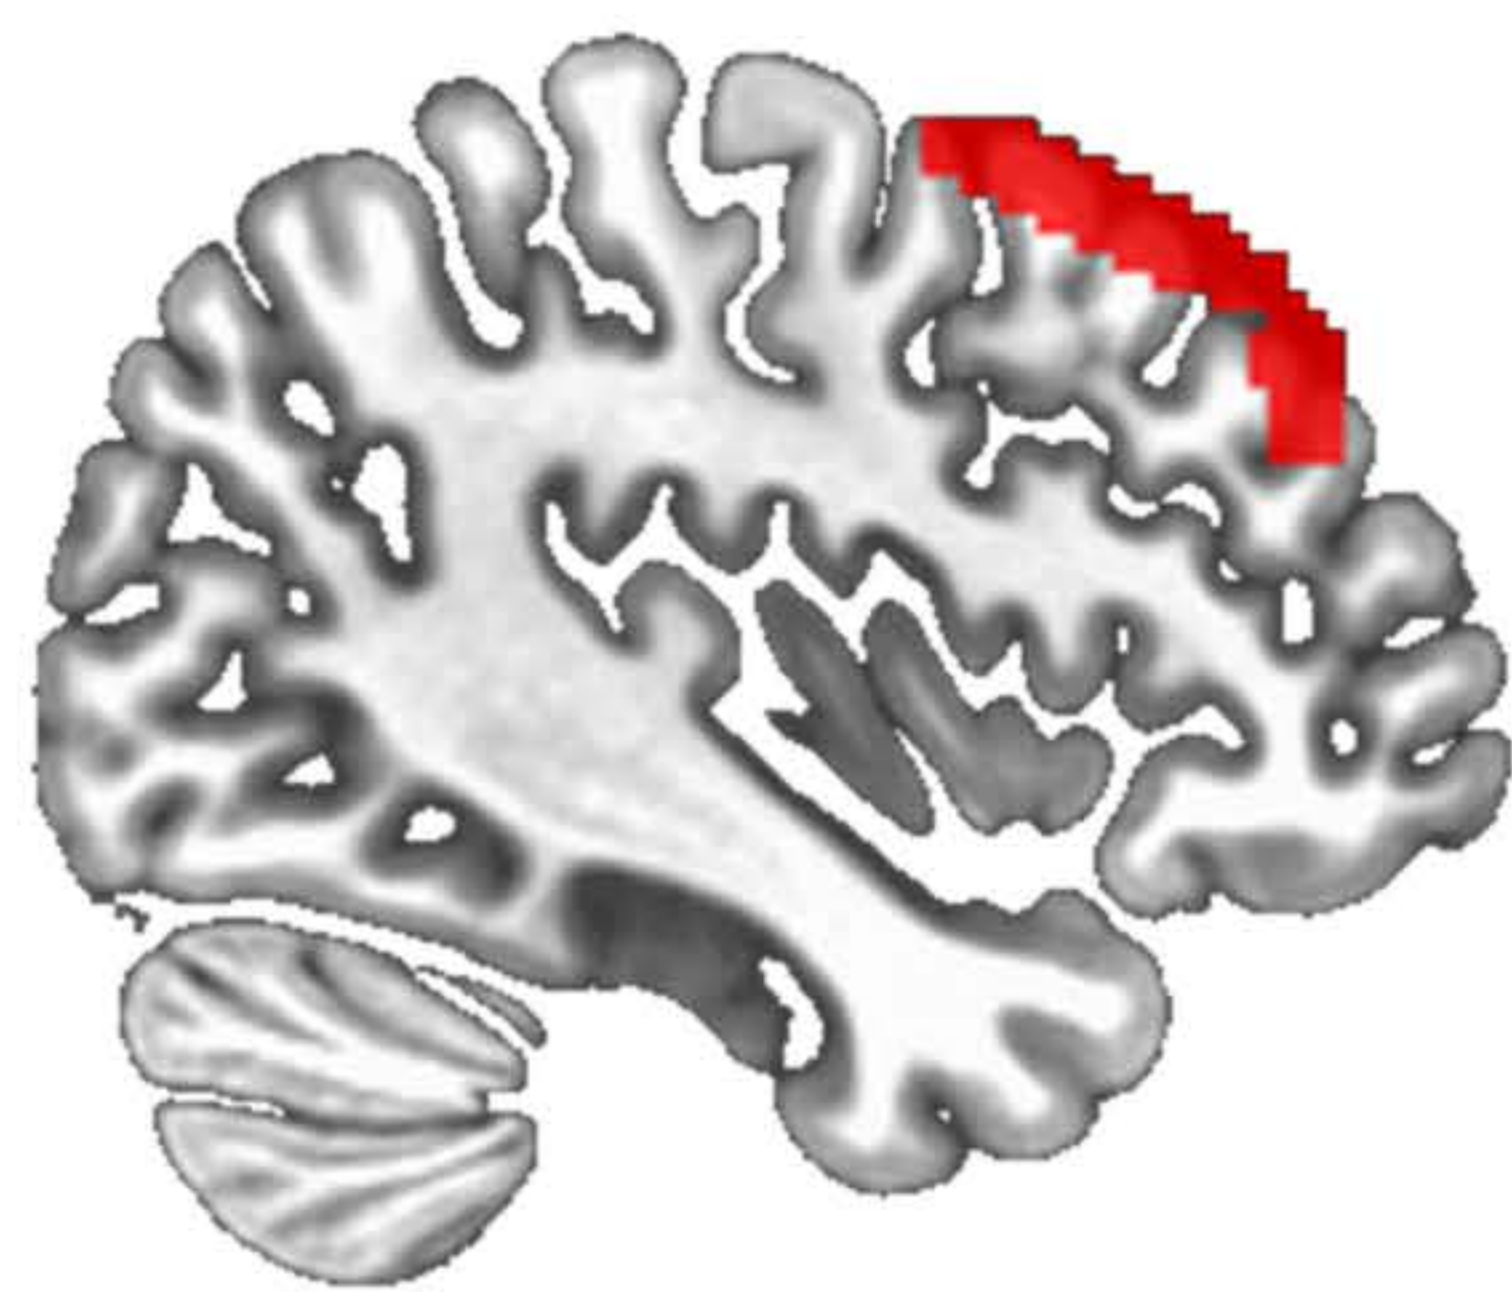



# INDARCM769WZL\_madrs\_right\_dlpfc

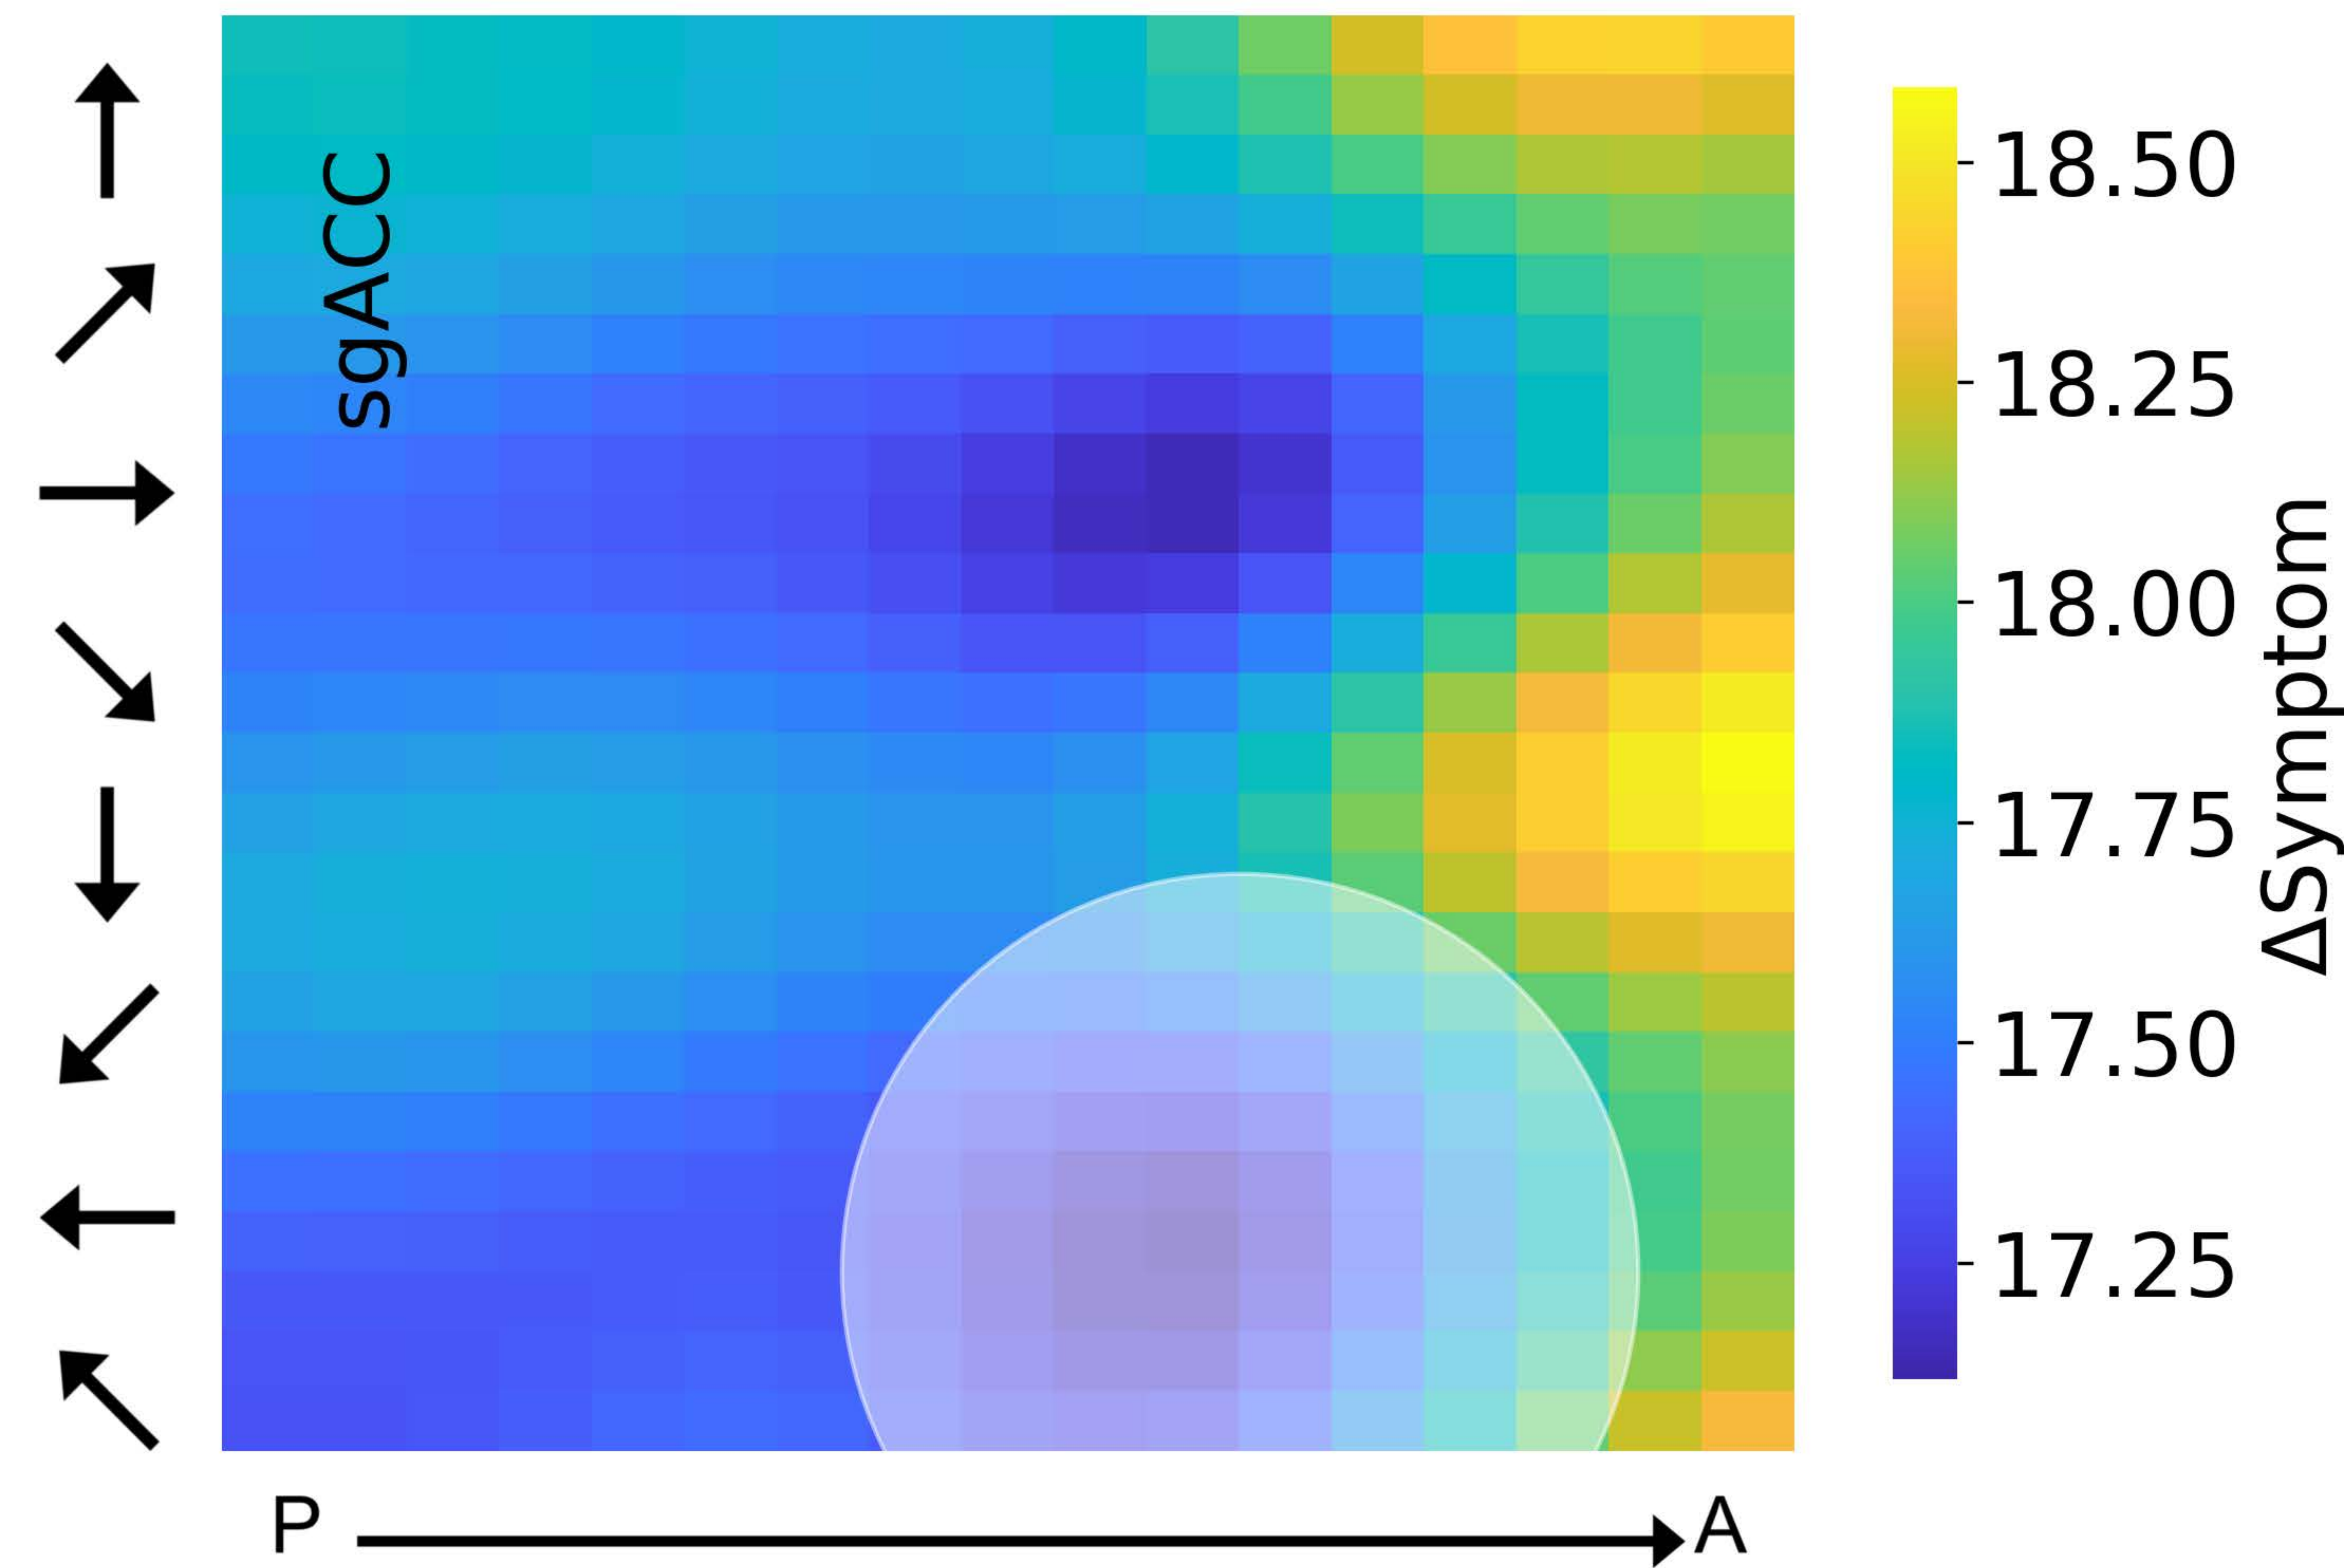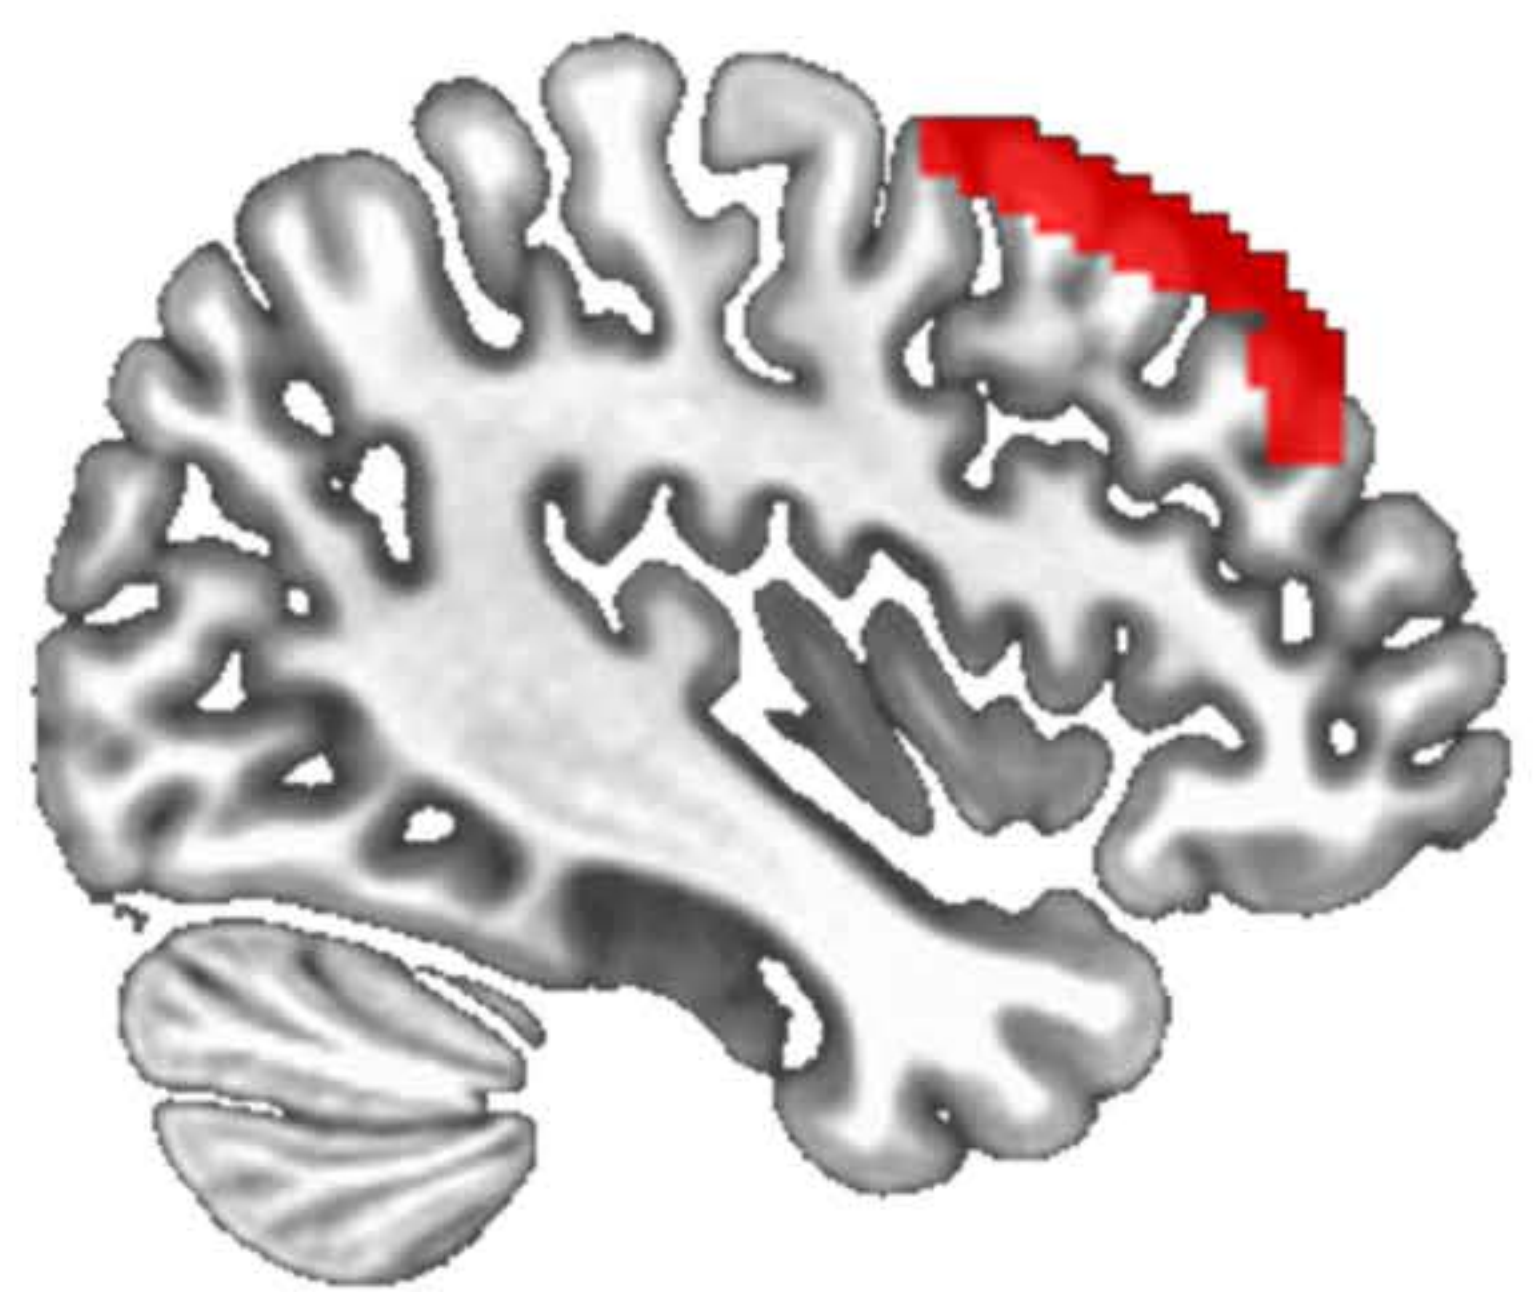



# INDARDL291XT0\_madrs\_right\_dlpfc

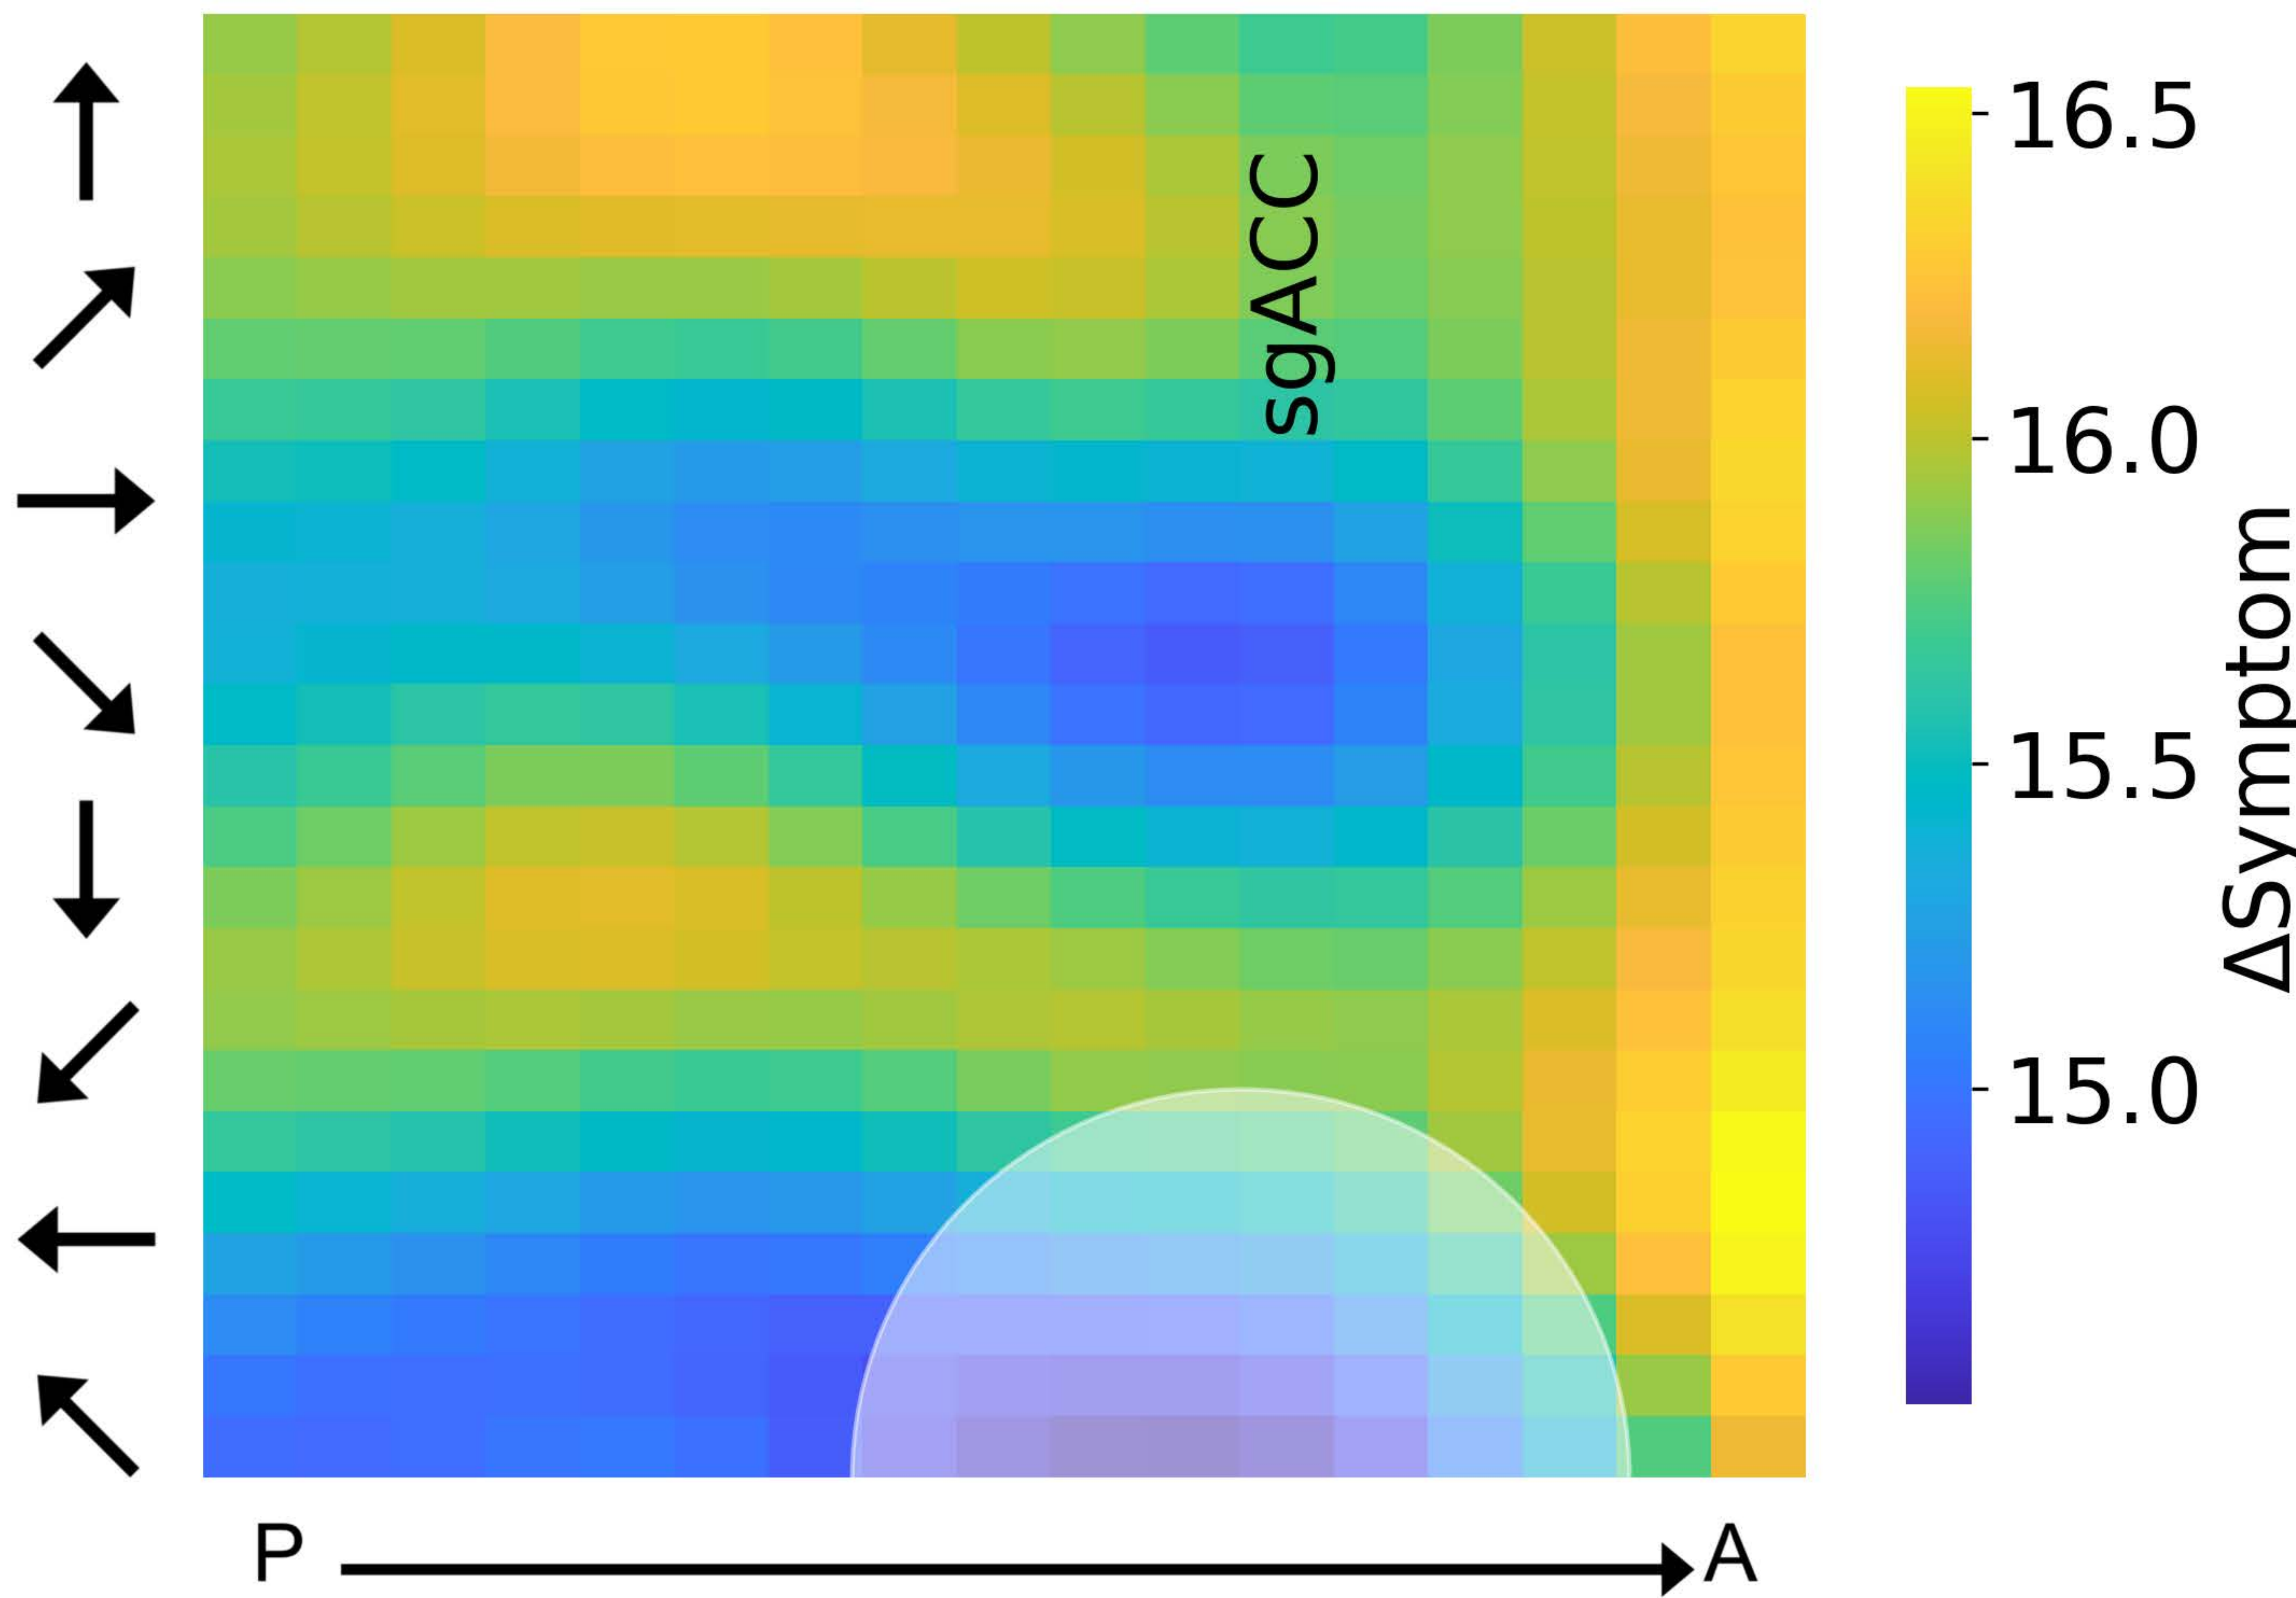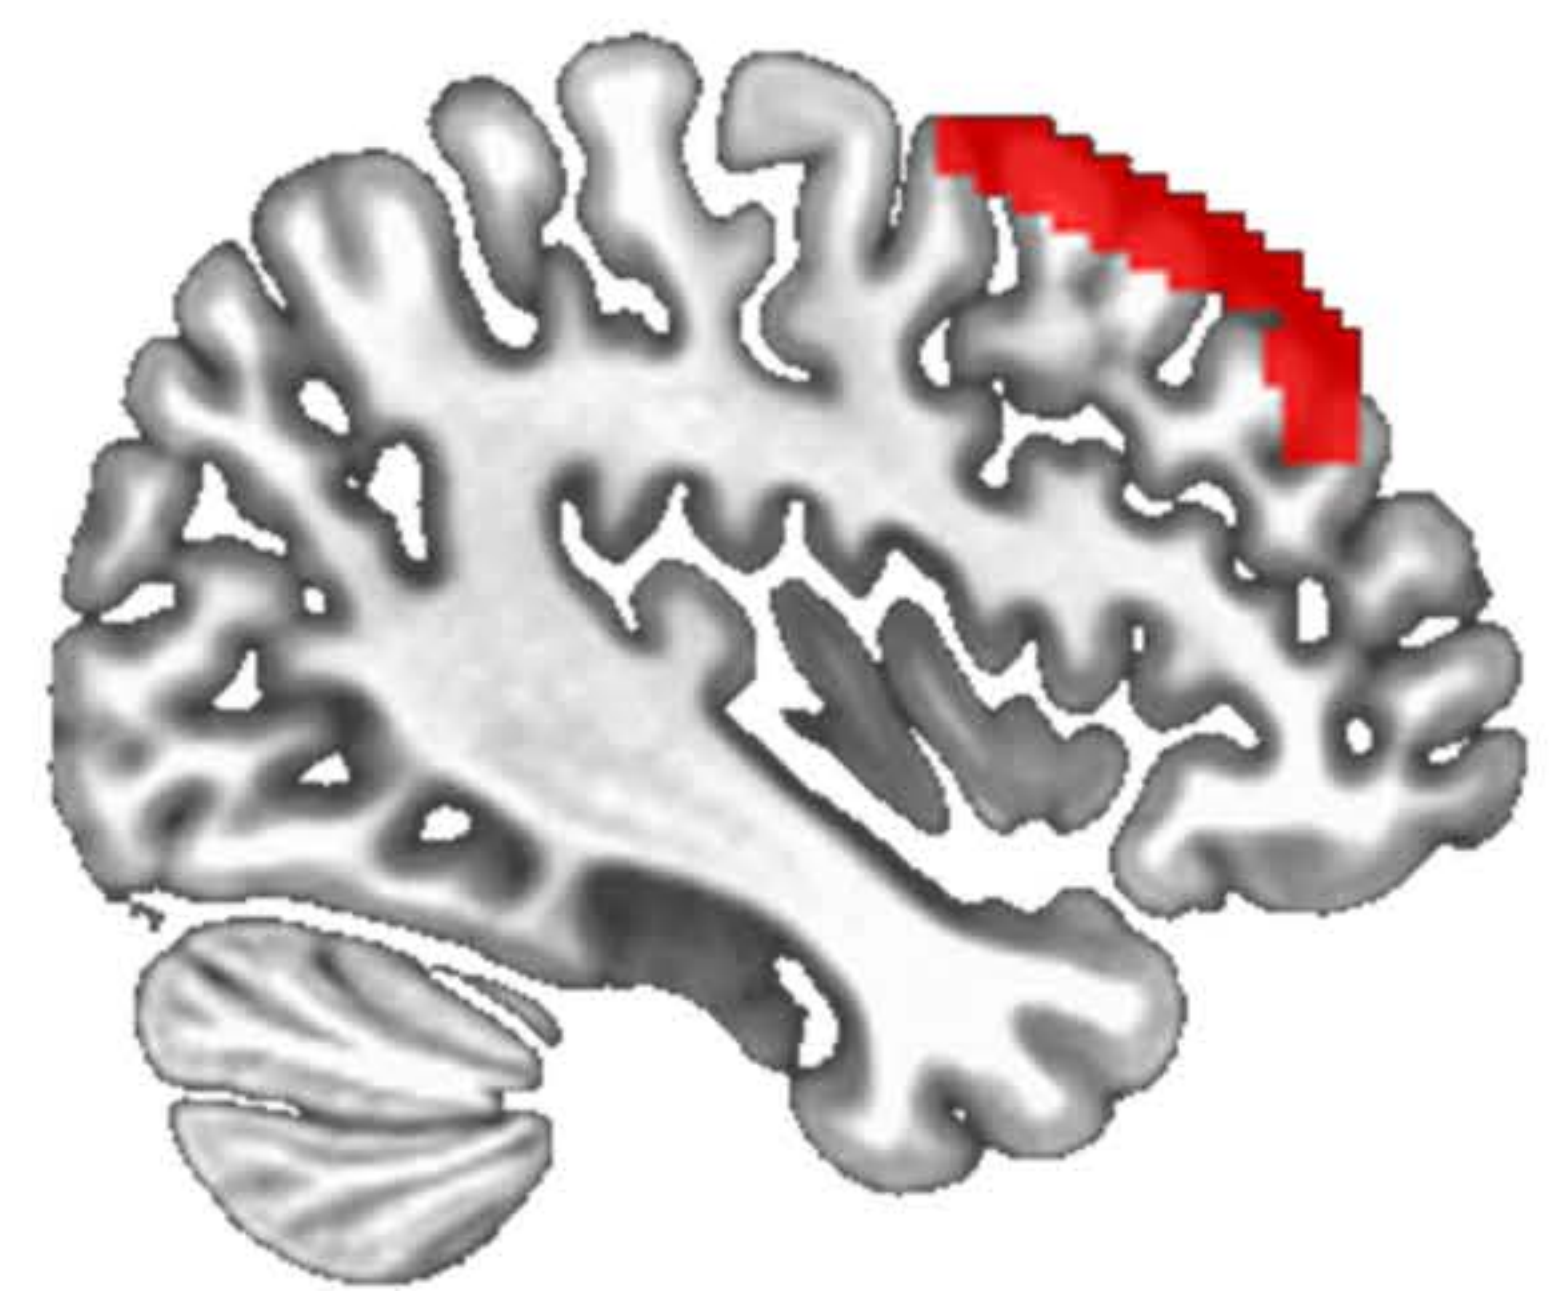



# INDARDL667VMW\_madrs\_right\_dlpfc

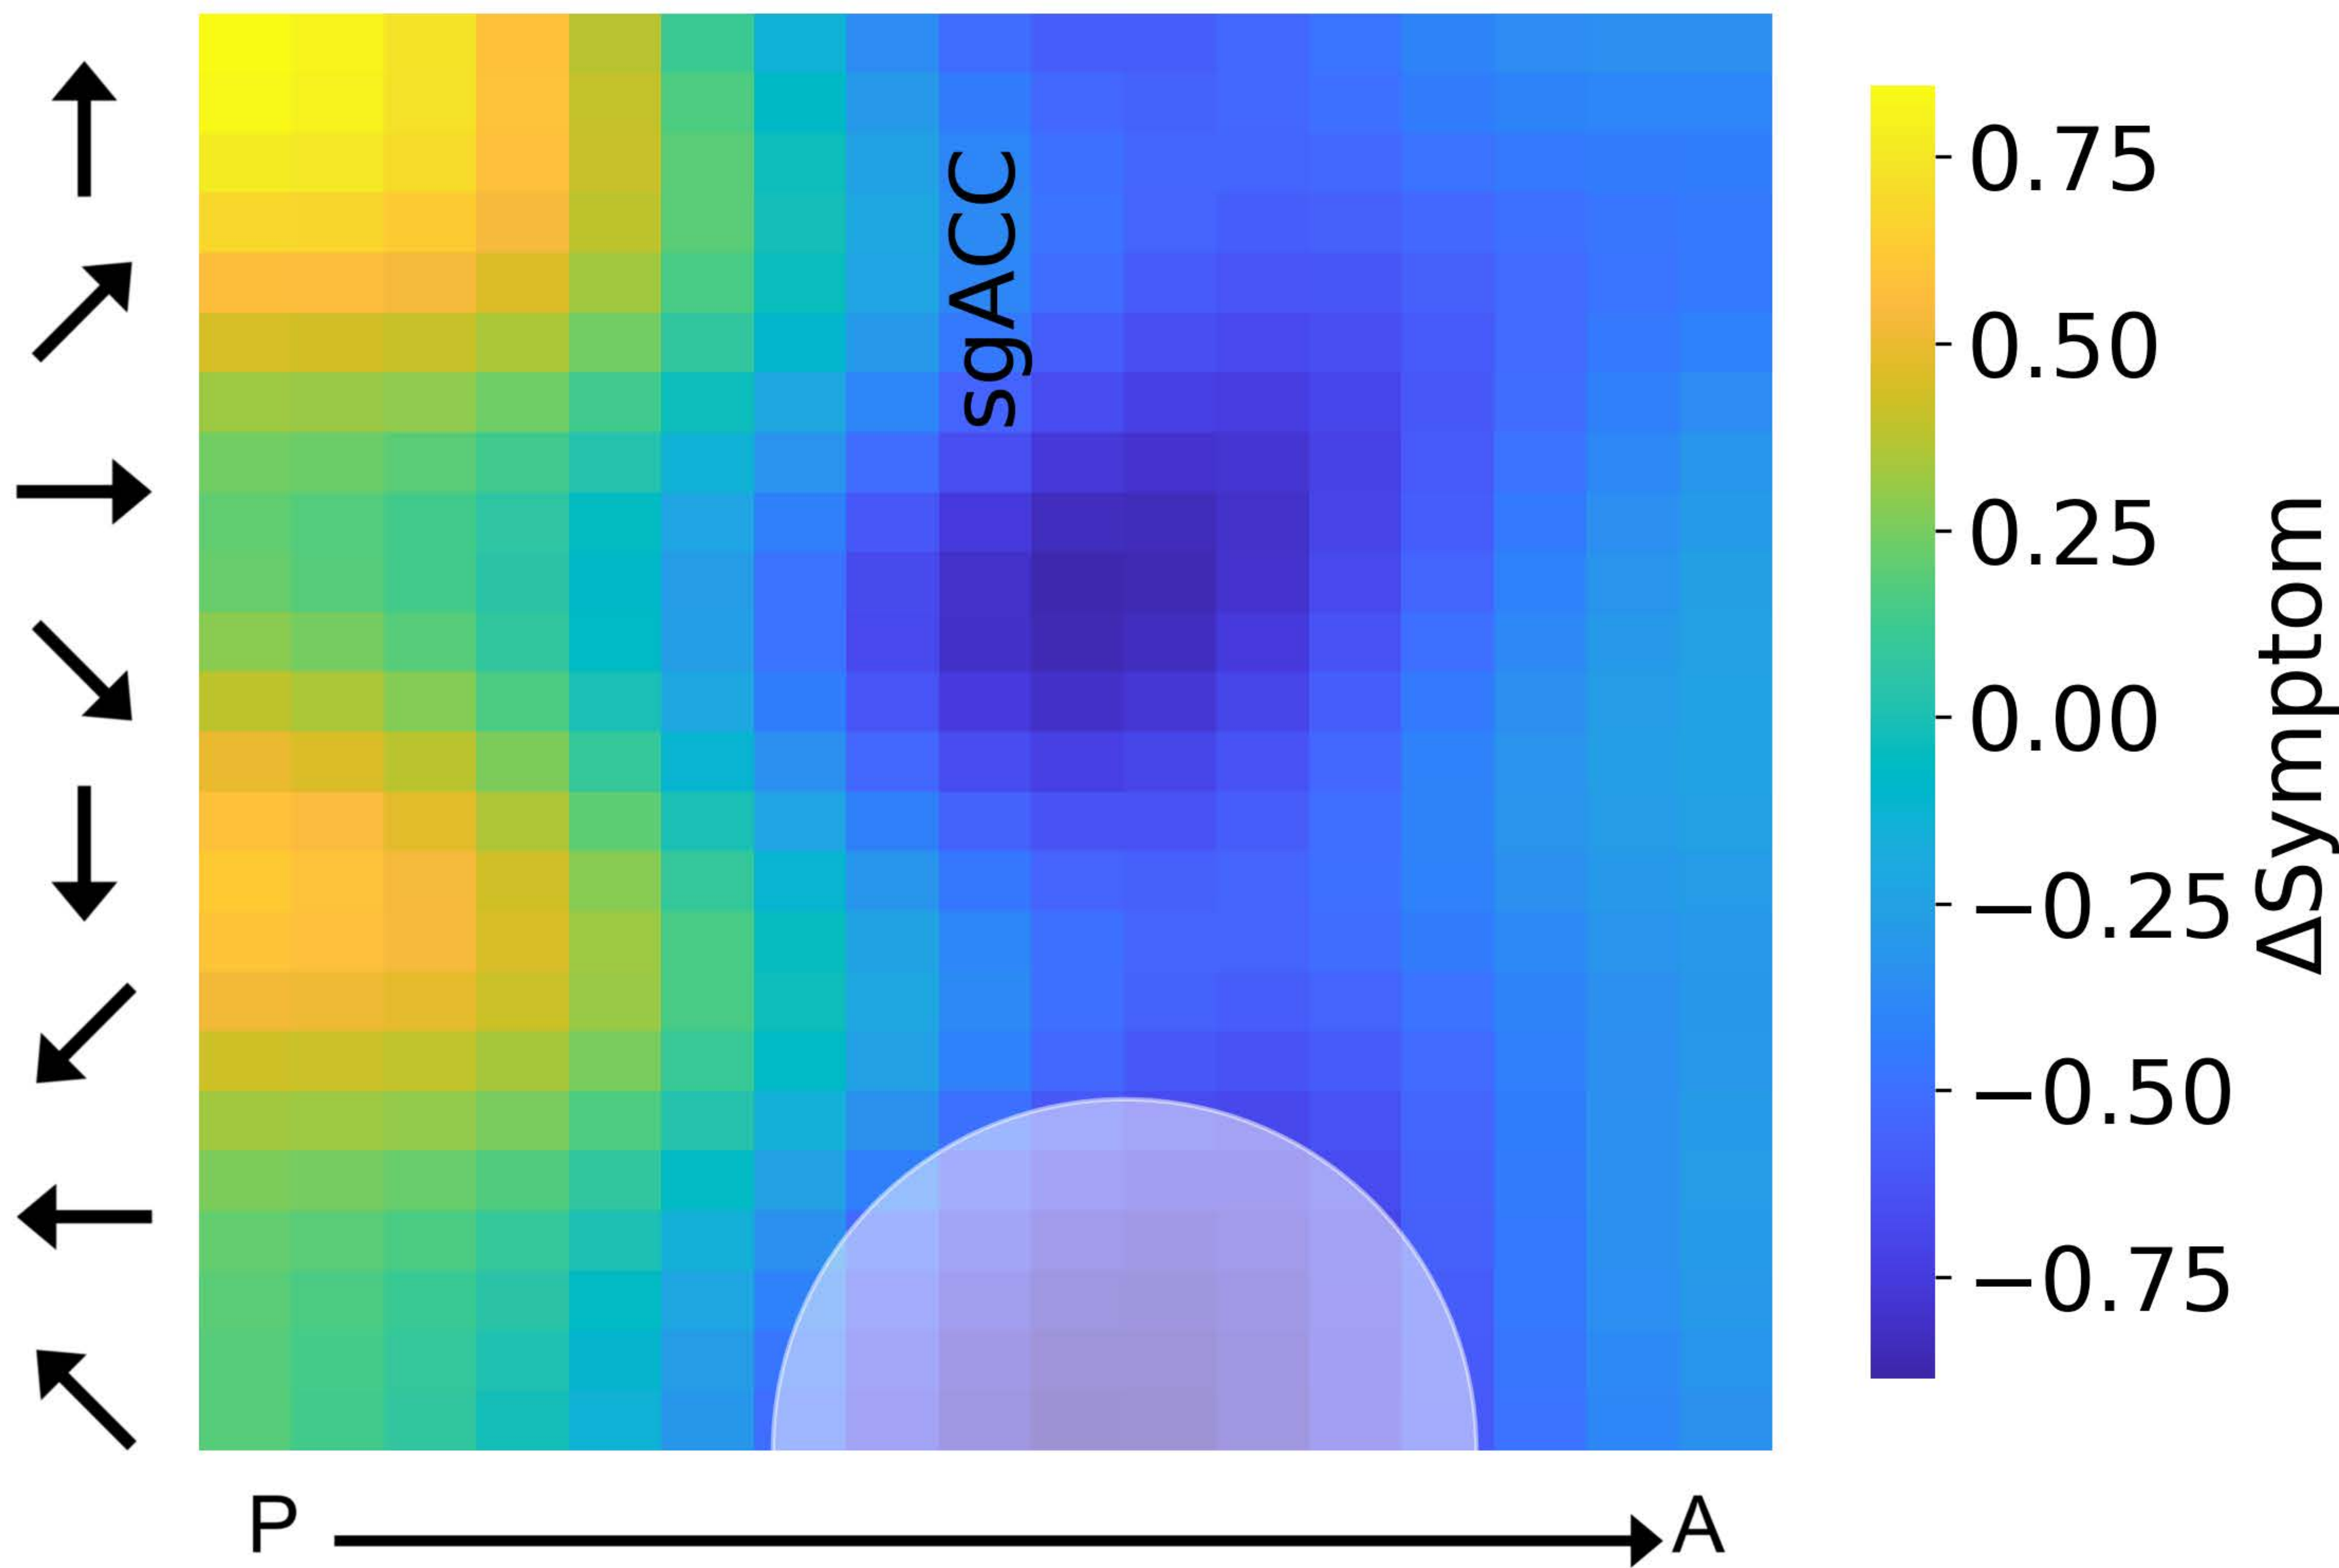



# NDARDR017YX2\_madrs\_right\_dlpfc

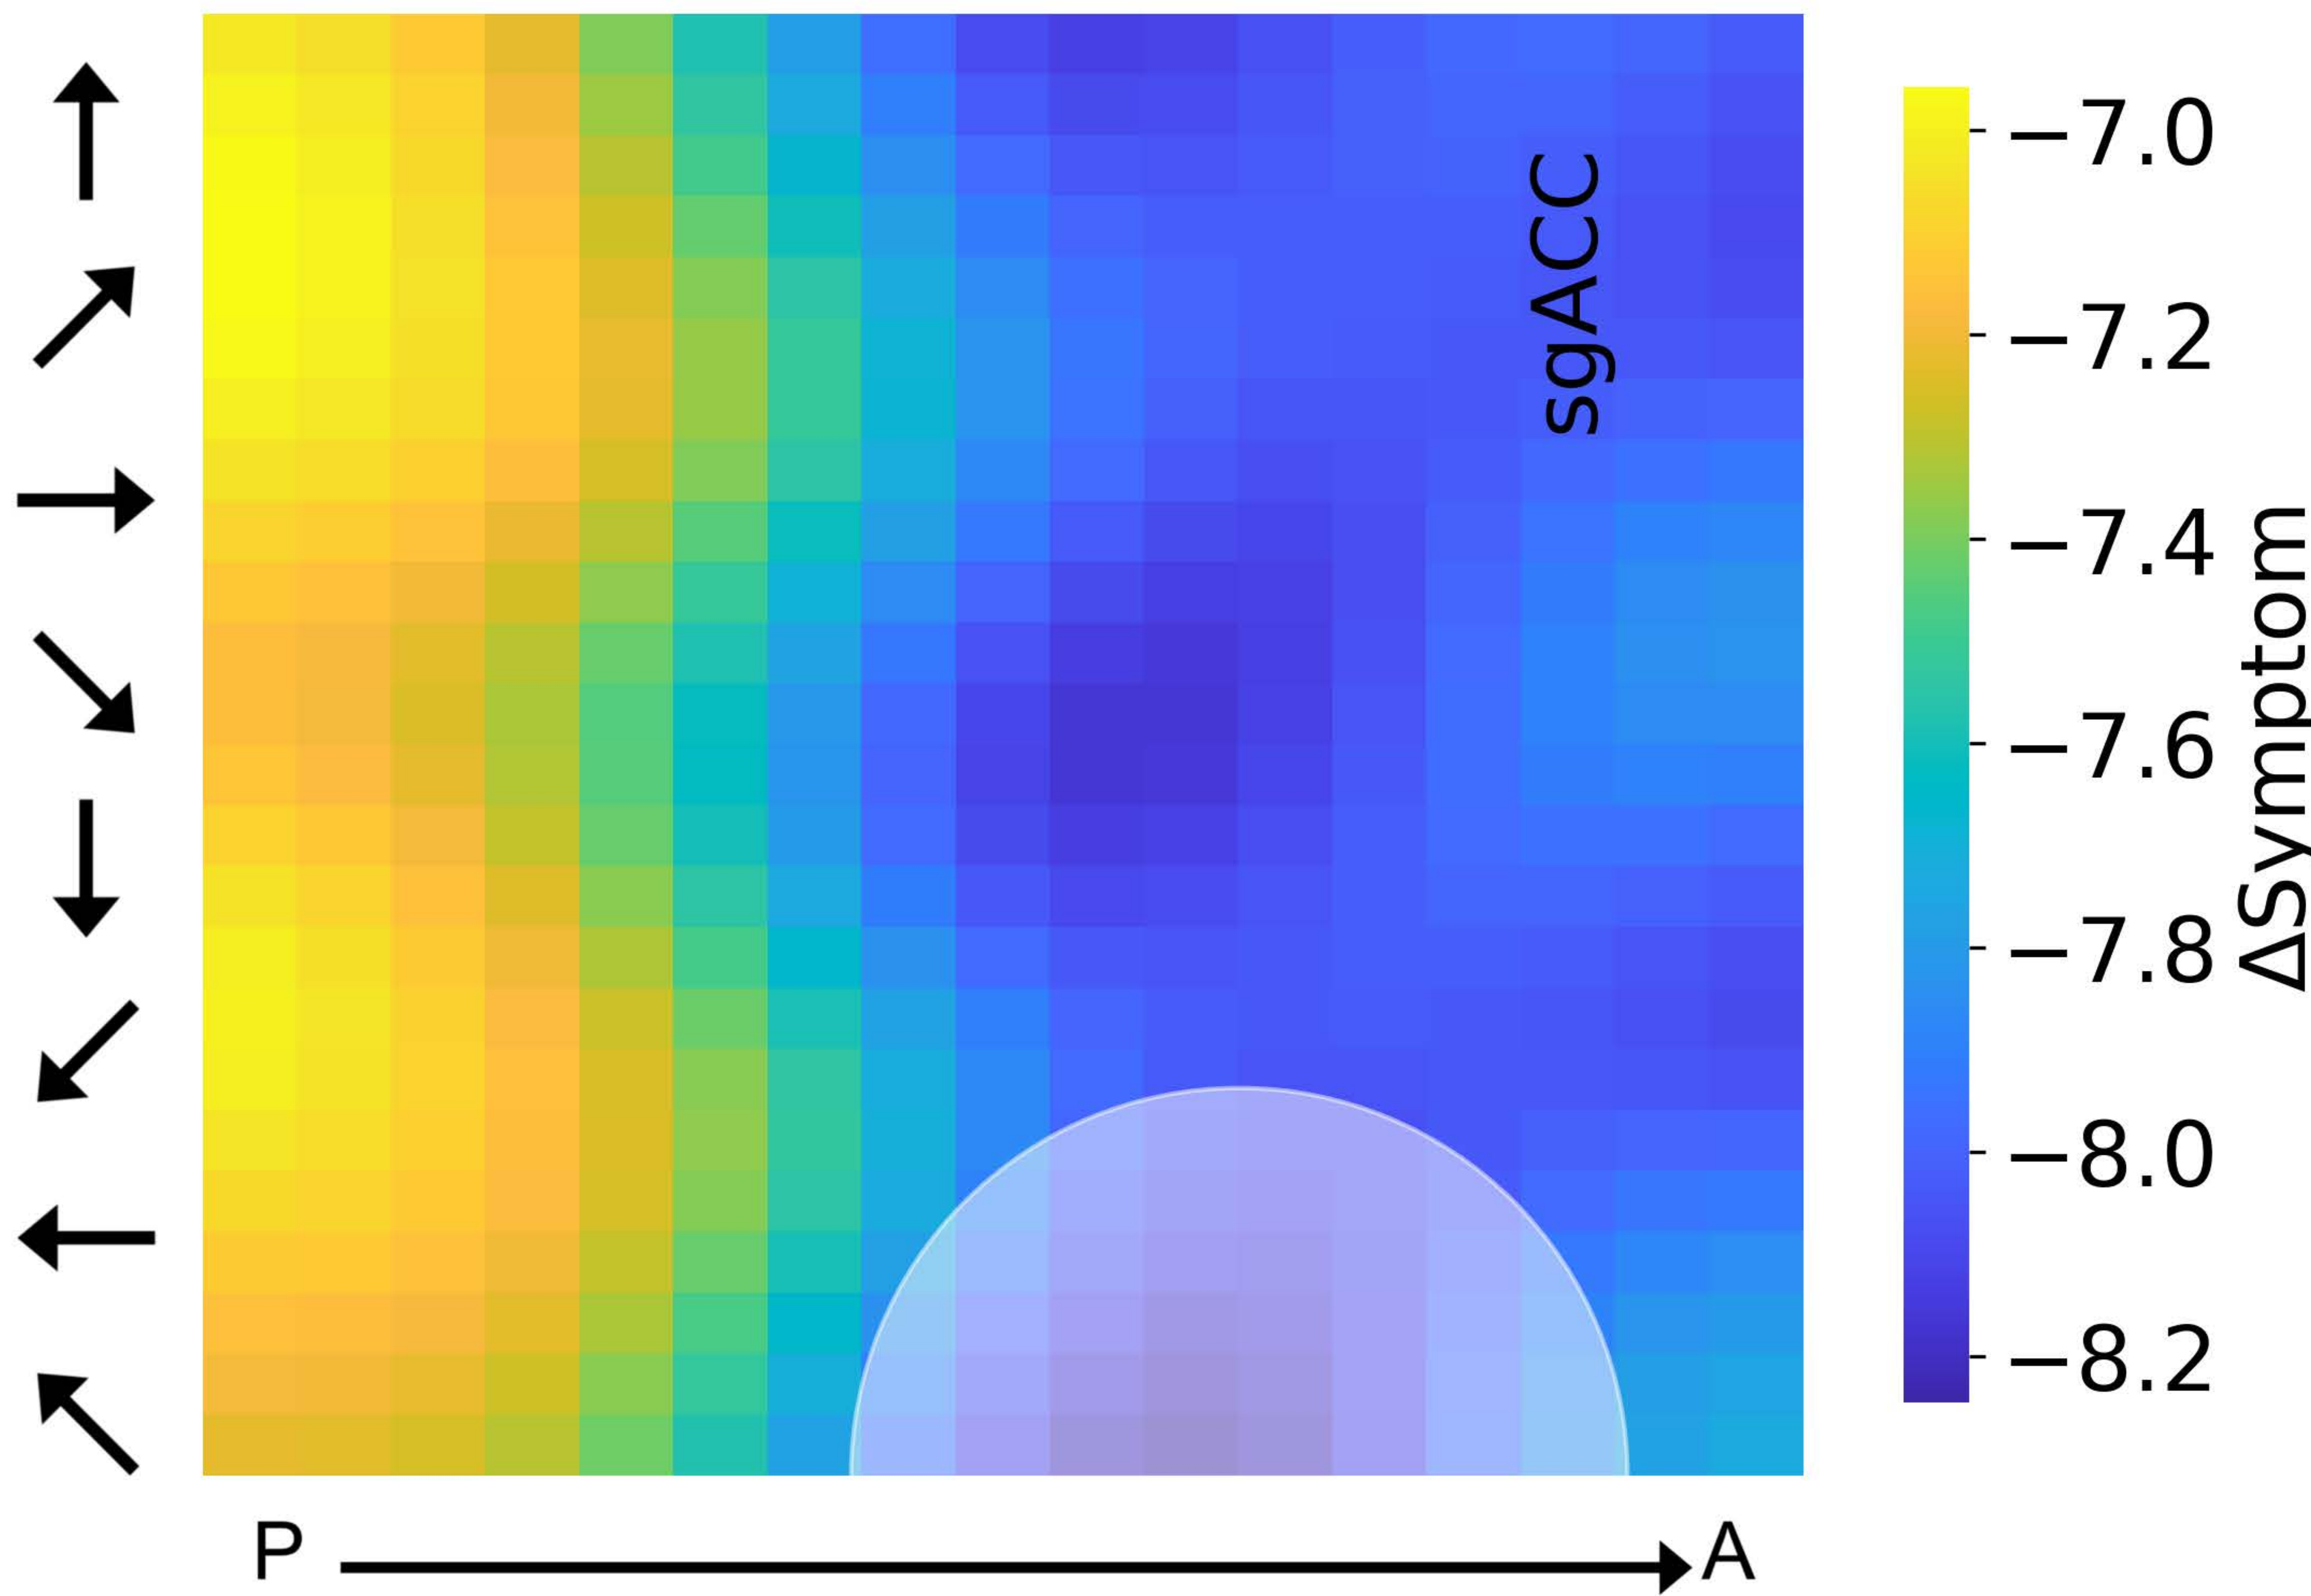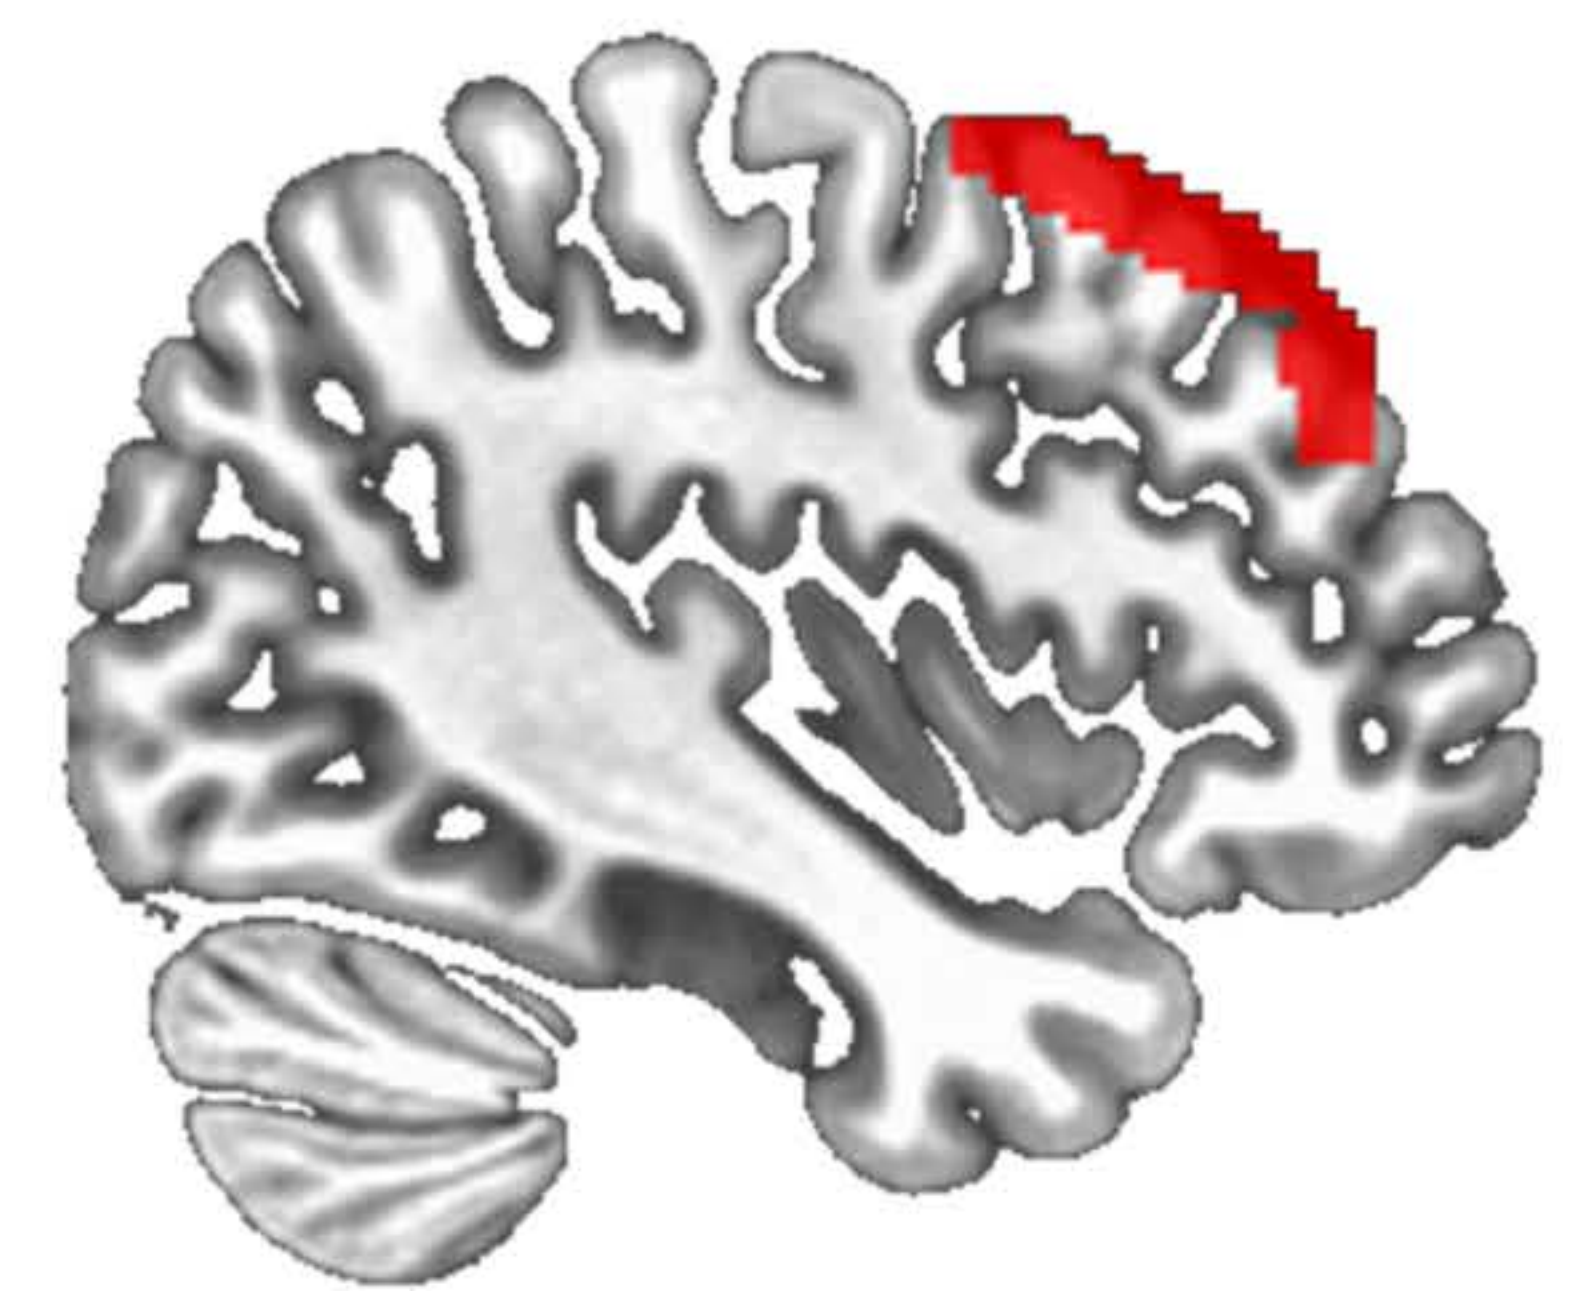



# INDARDU203PAW\_madr\_right\_dlpfc

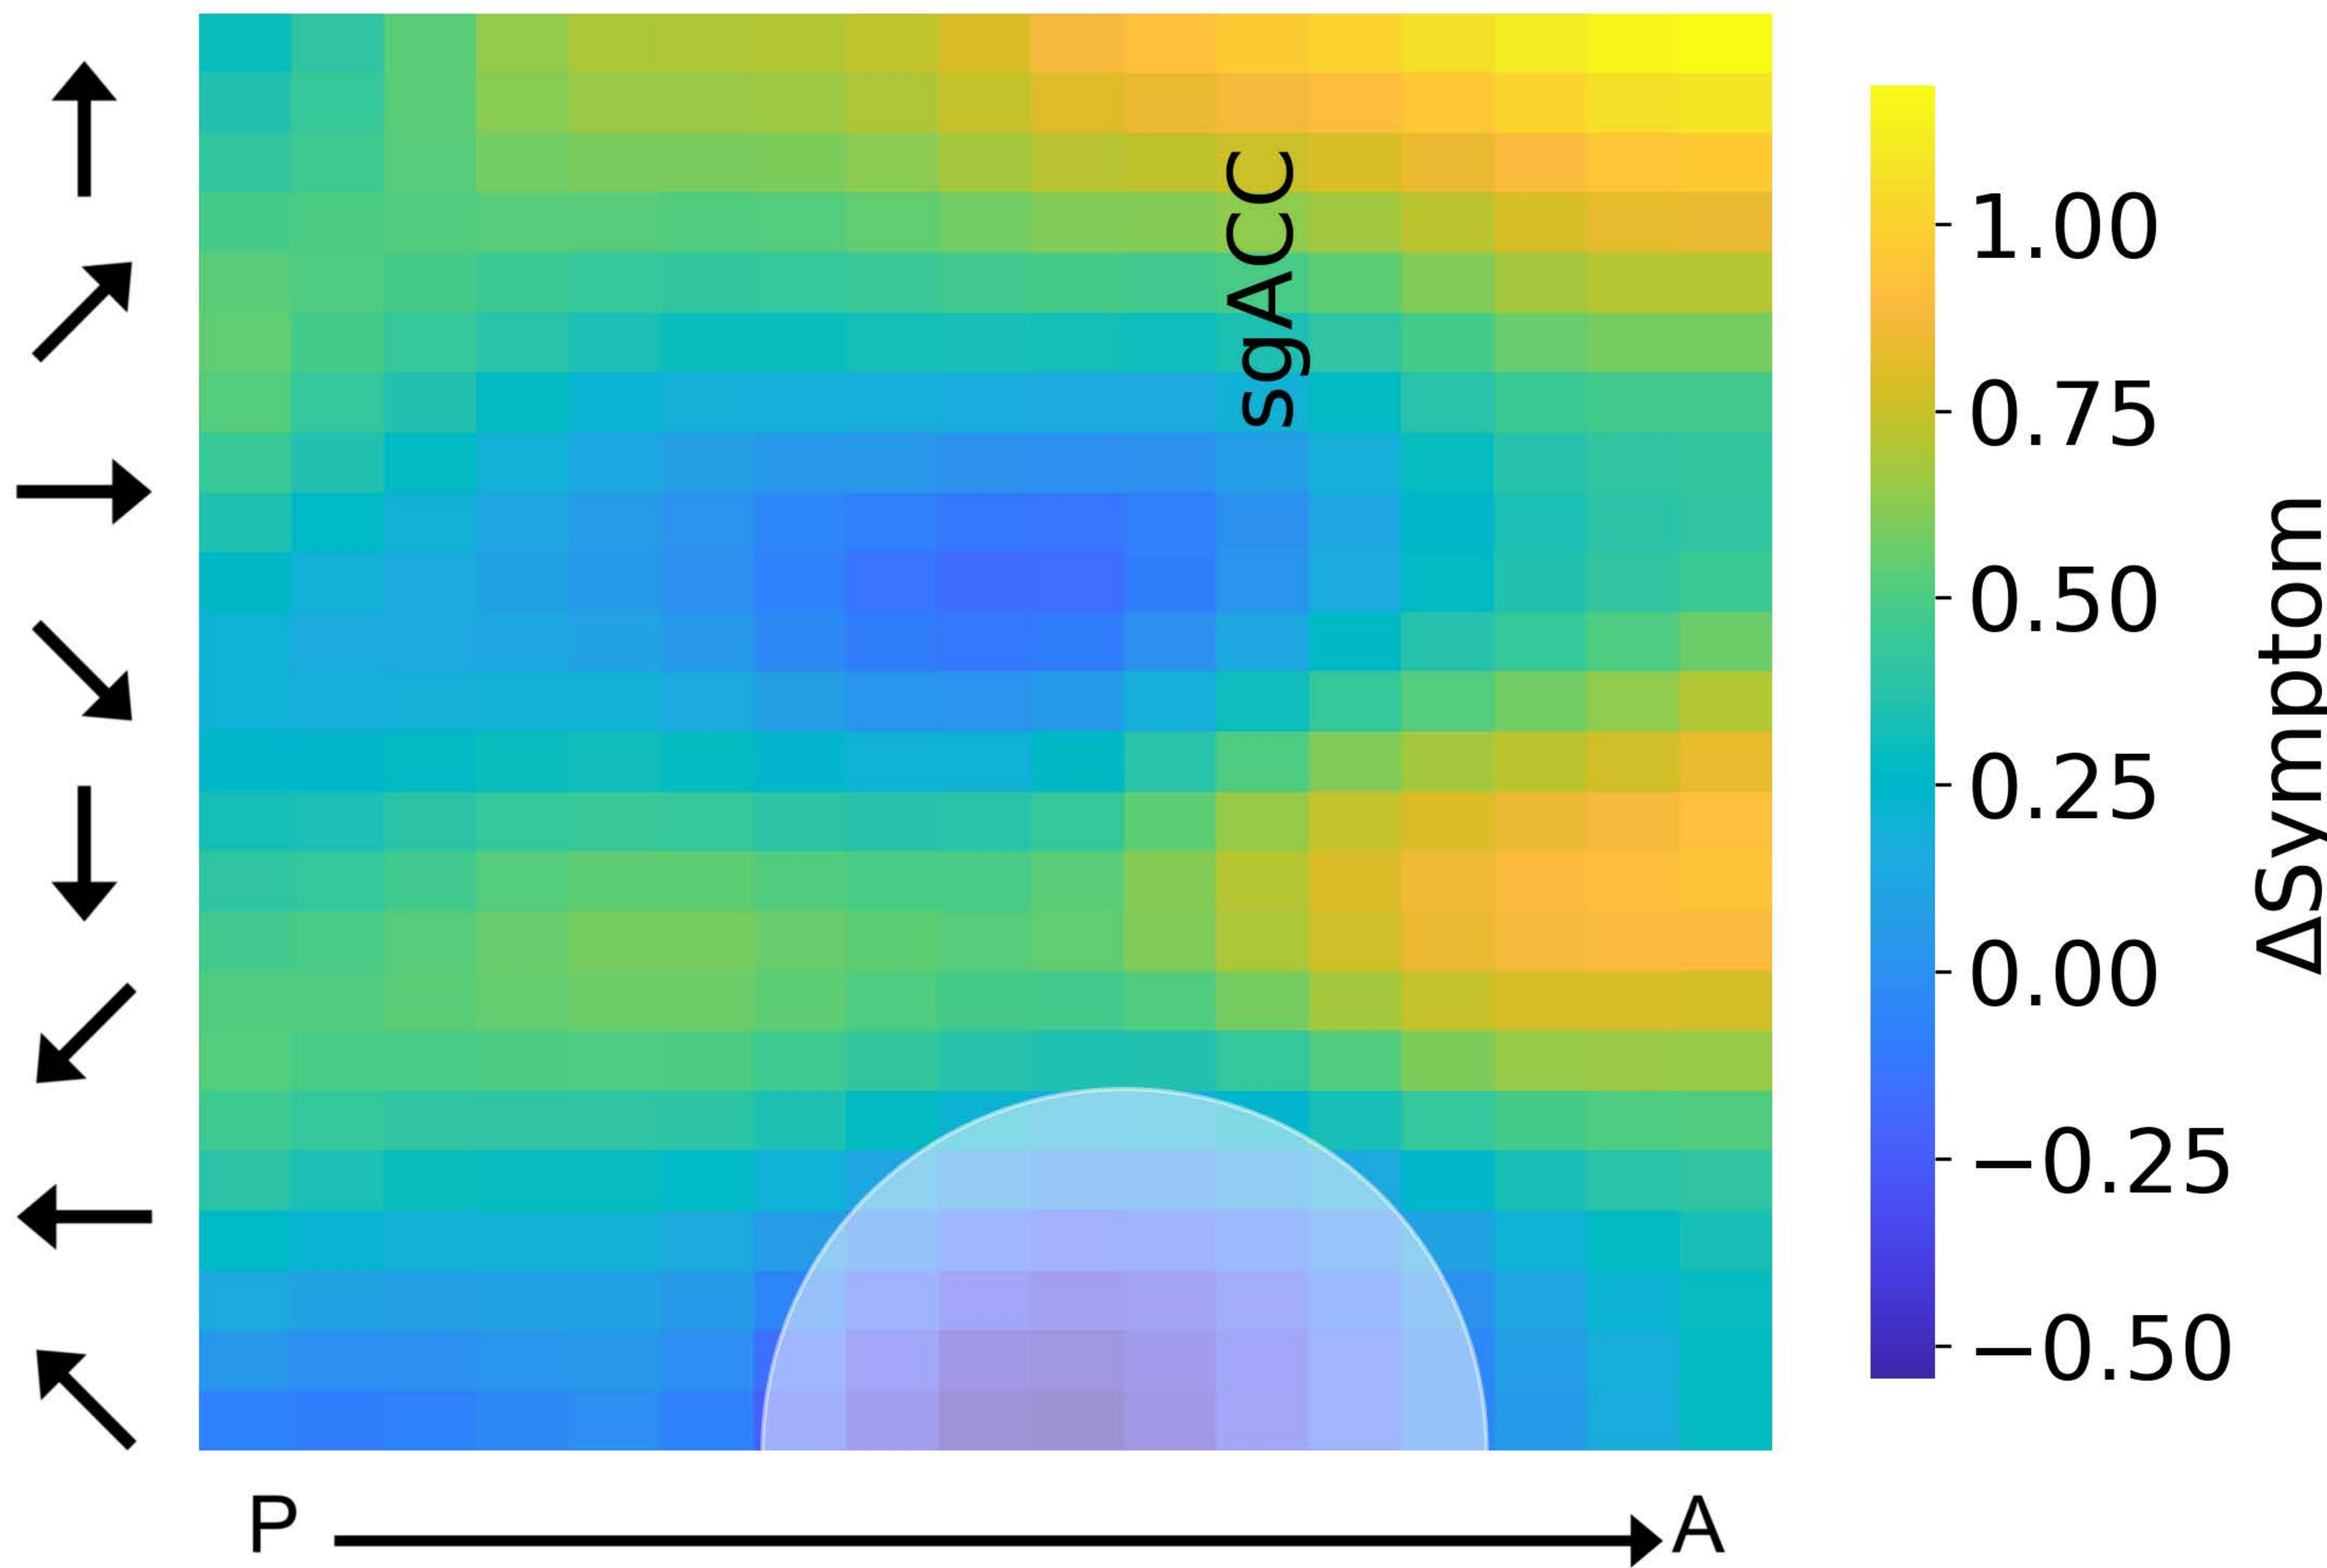



# INDARDU282NKX\_madrs\_right\_dlpfc

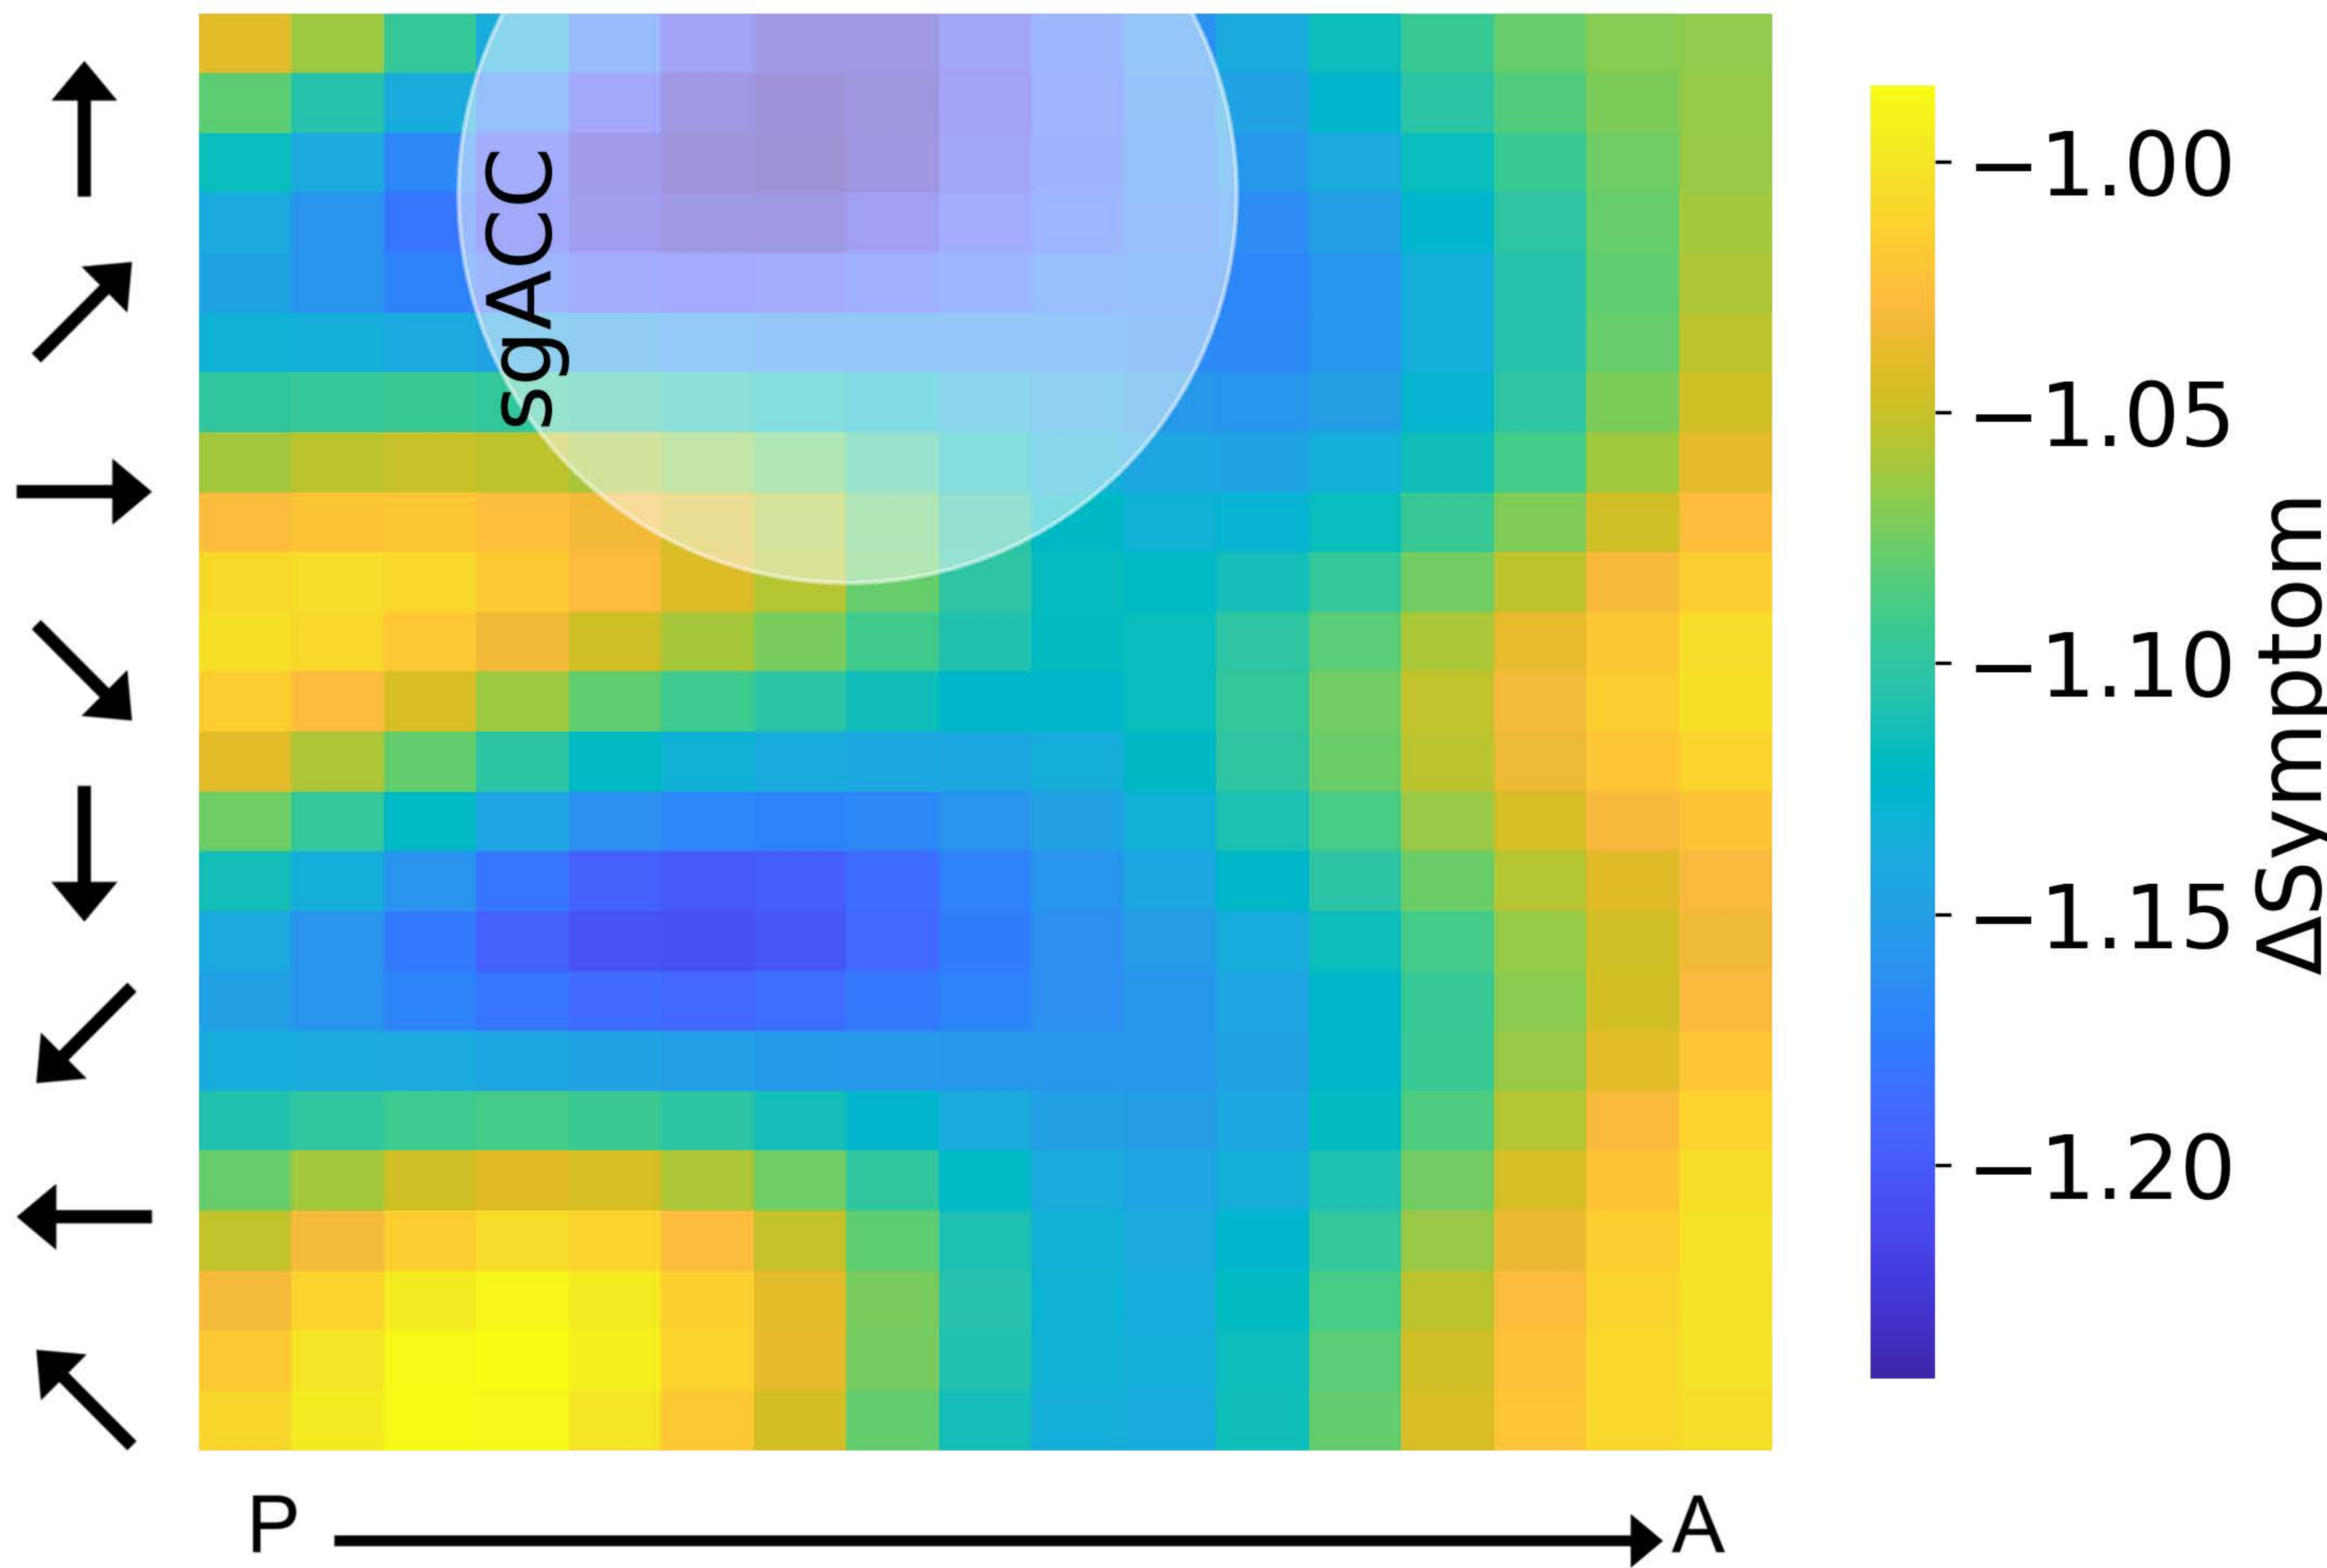



NDARDV056JZW\_madrs\_right\_dlpfc

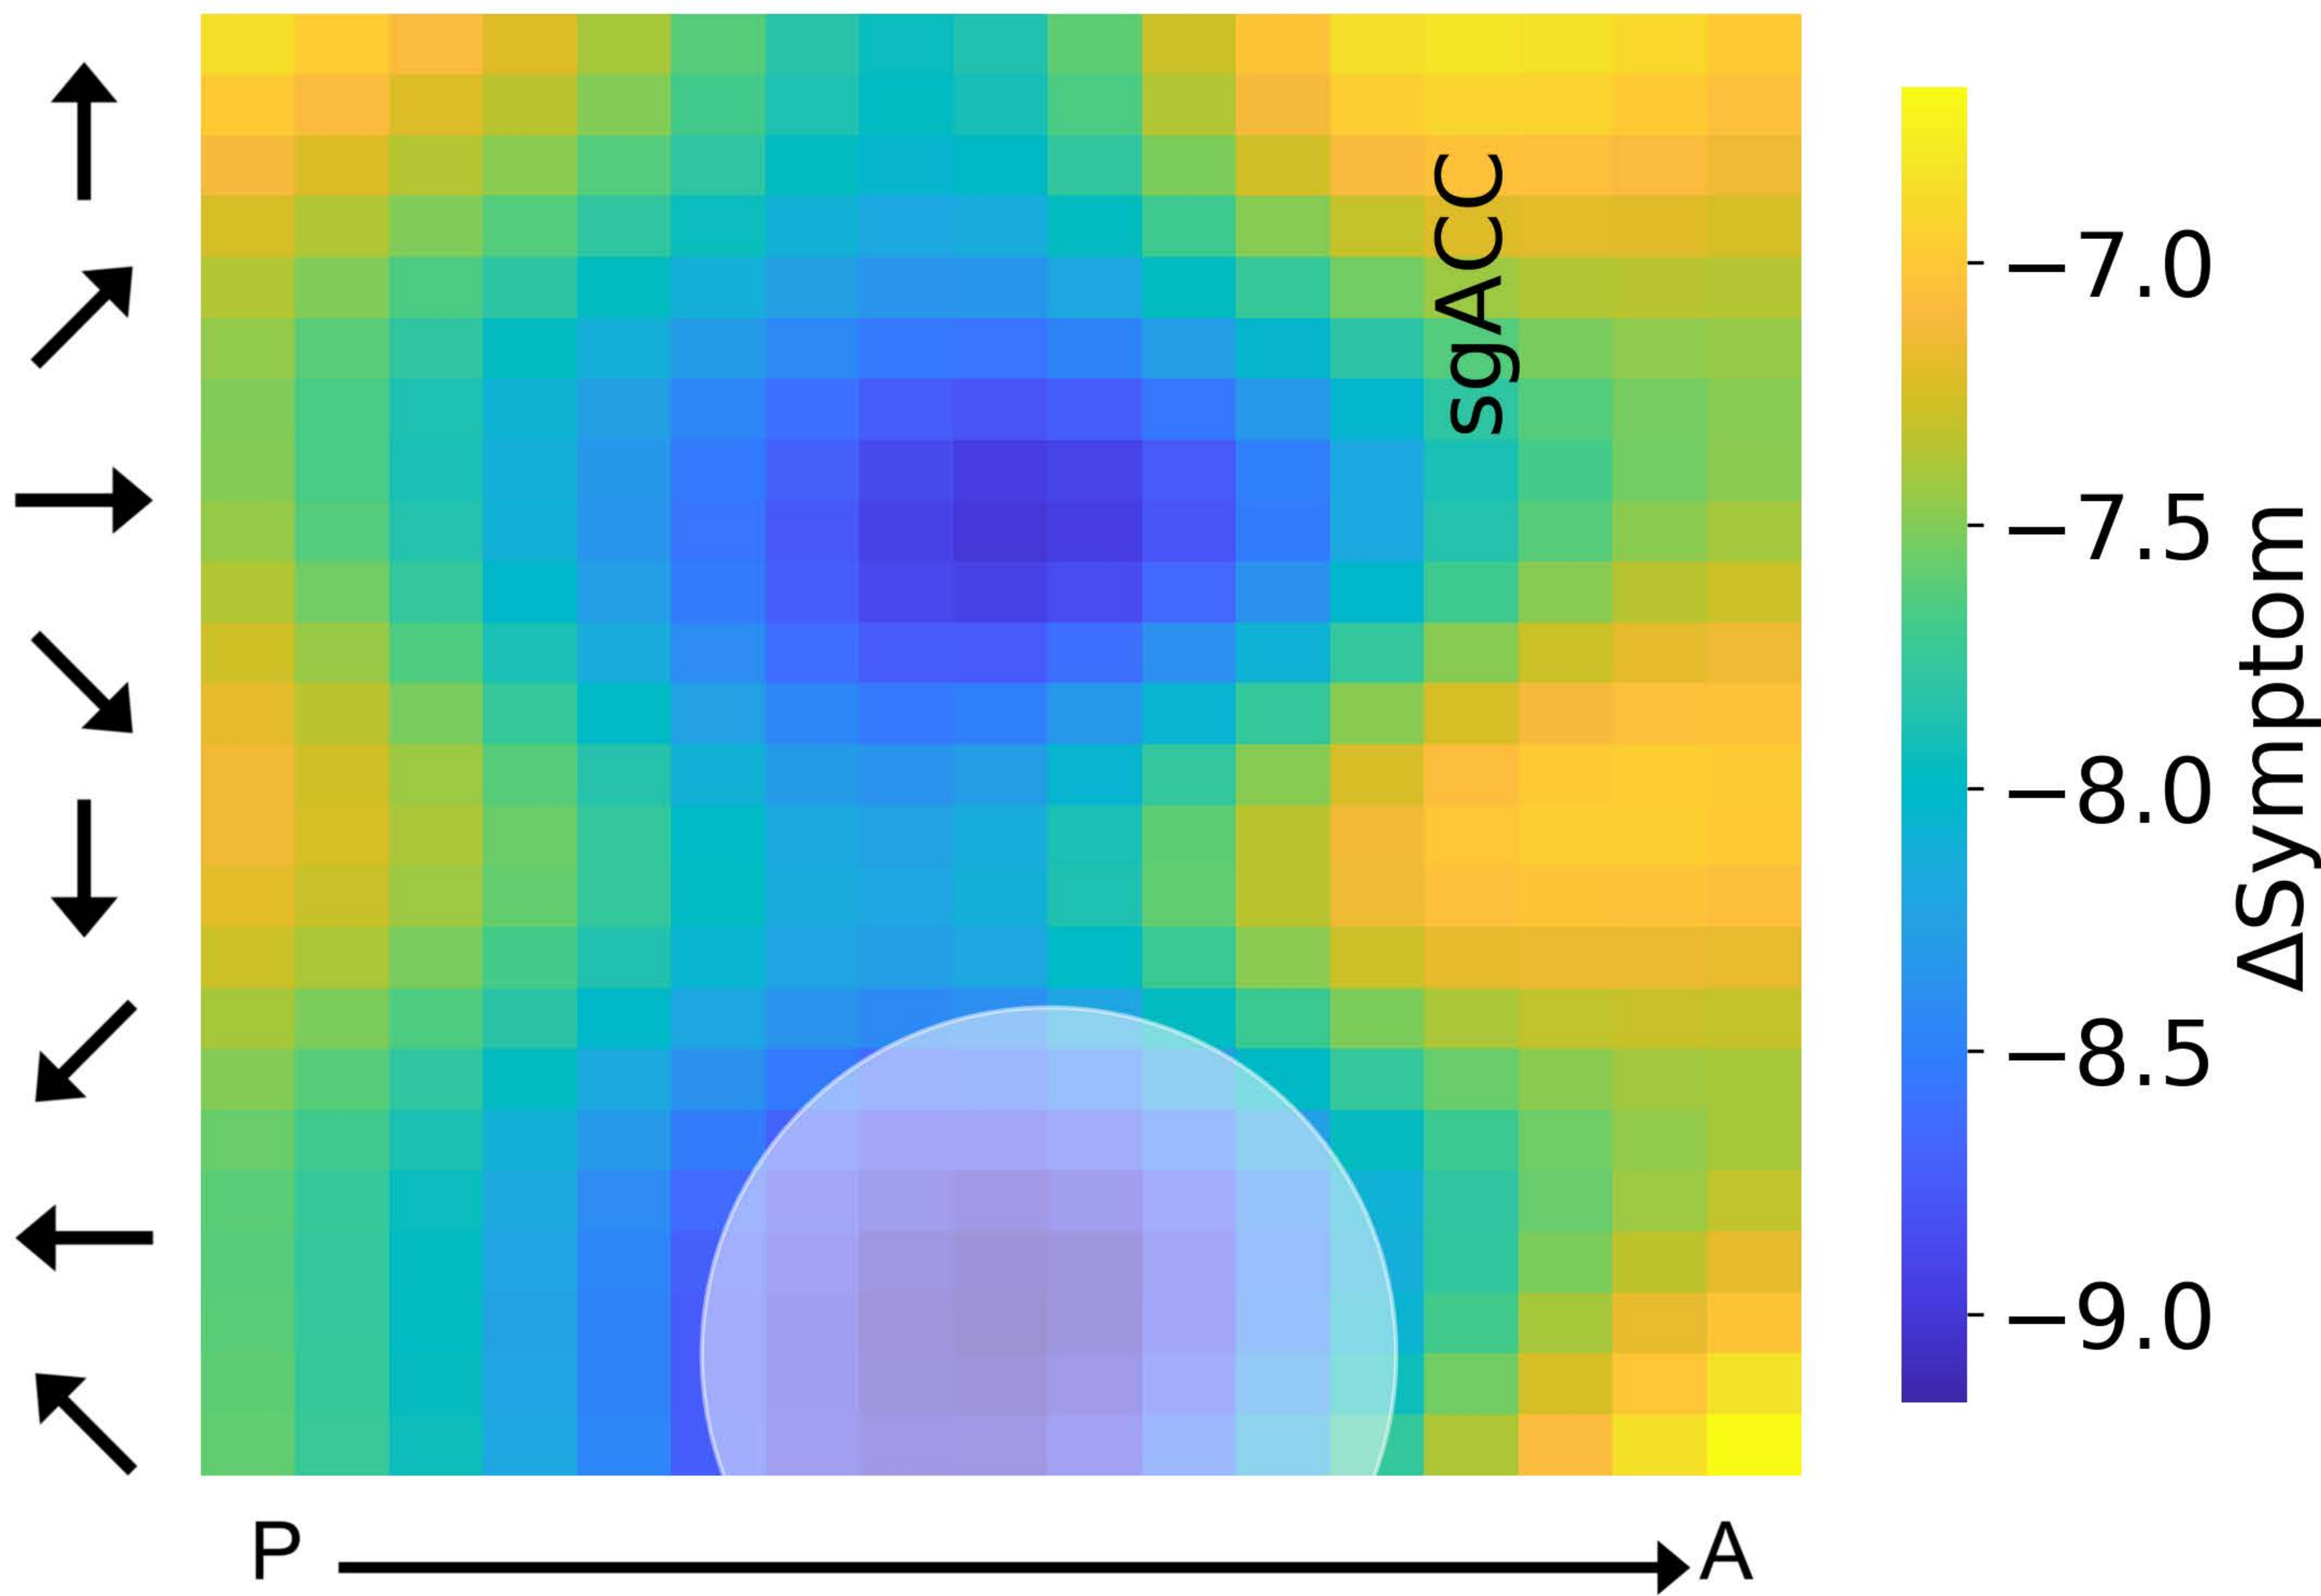



# NDAREB933ZEU\_madrs\_right\_dlpfc

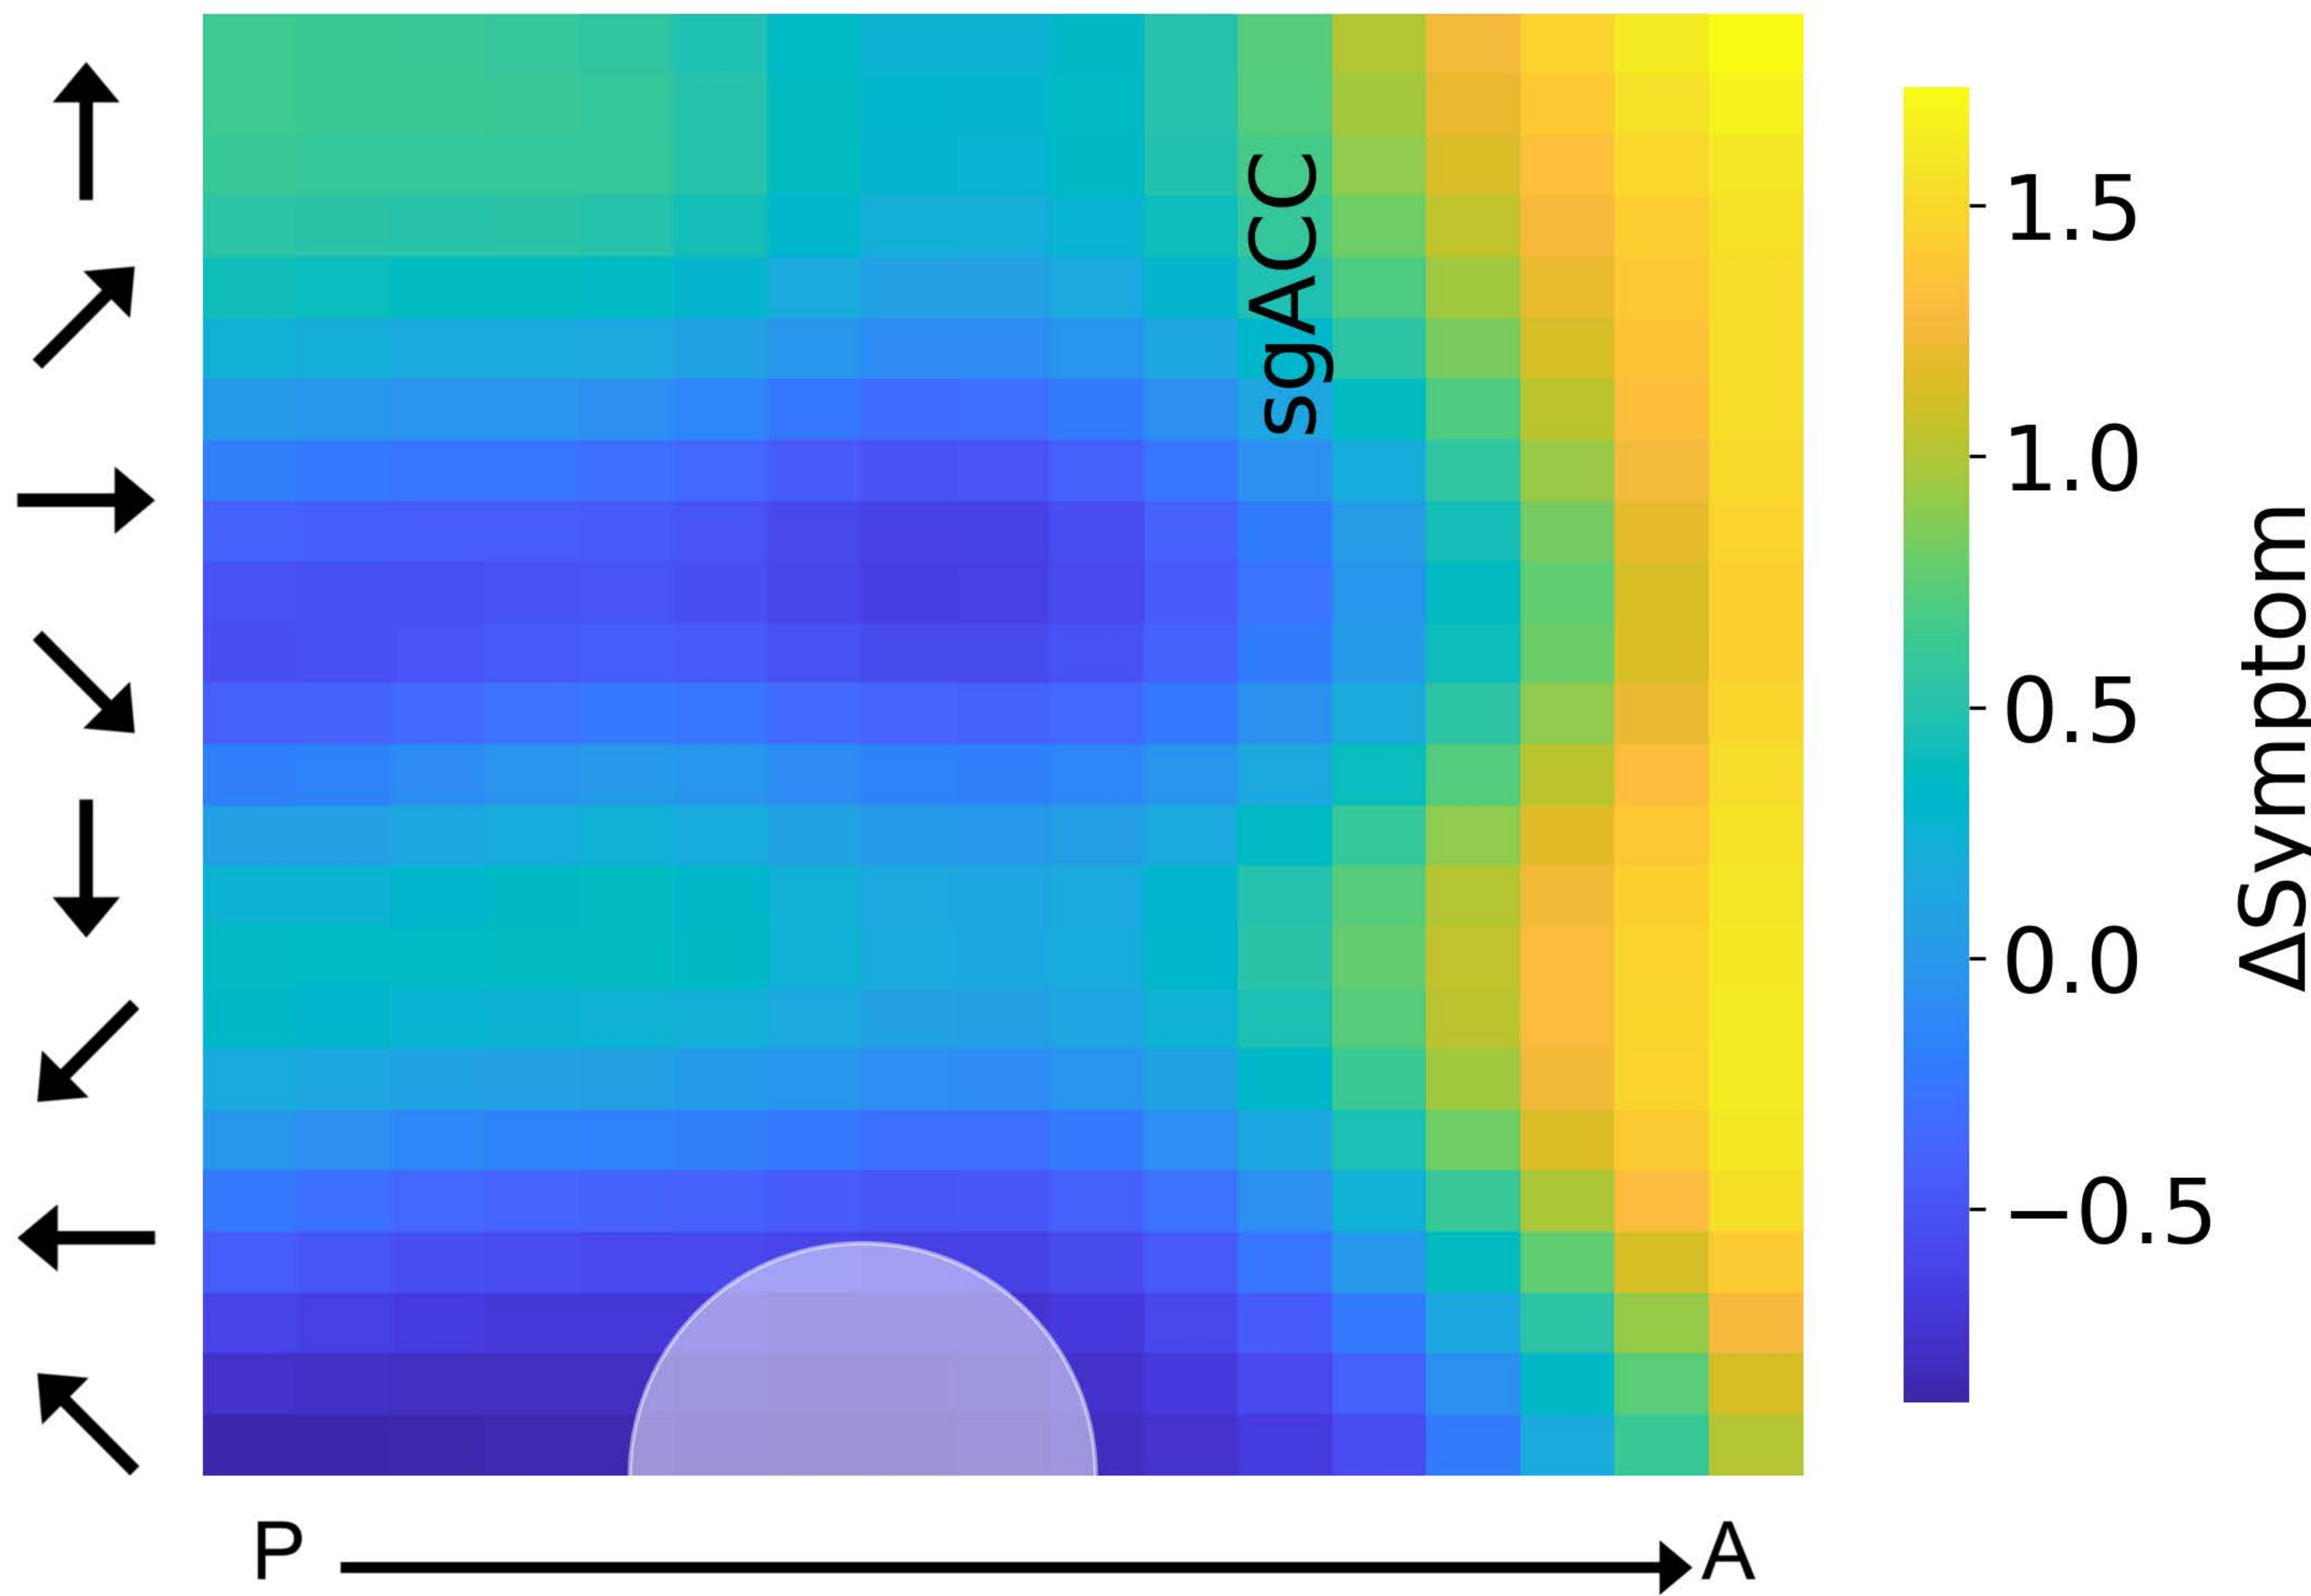



# NDAREU727GCY\_madrs\_right\_dlpfc

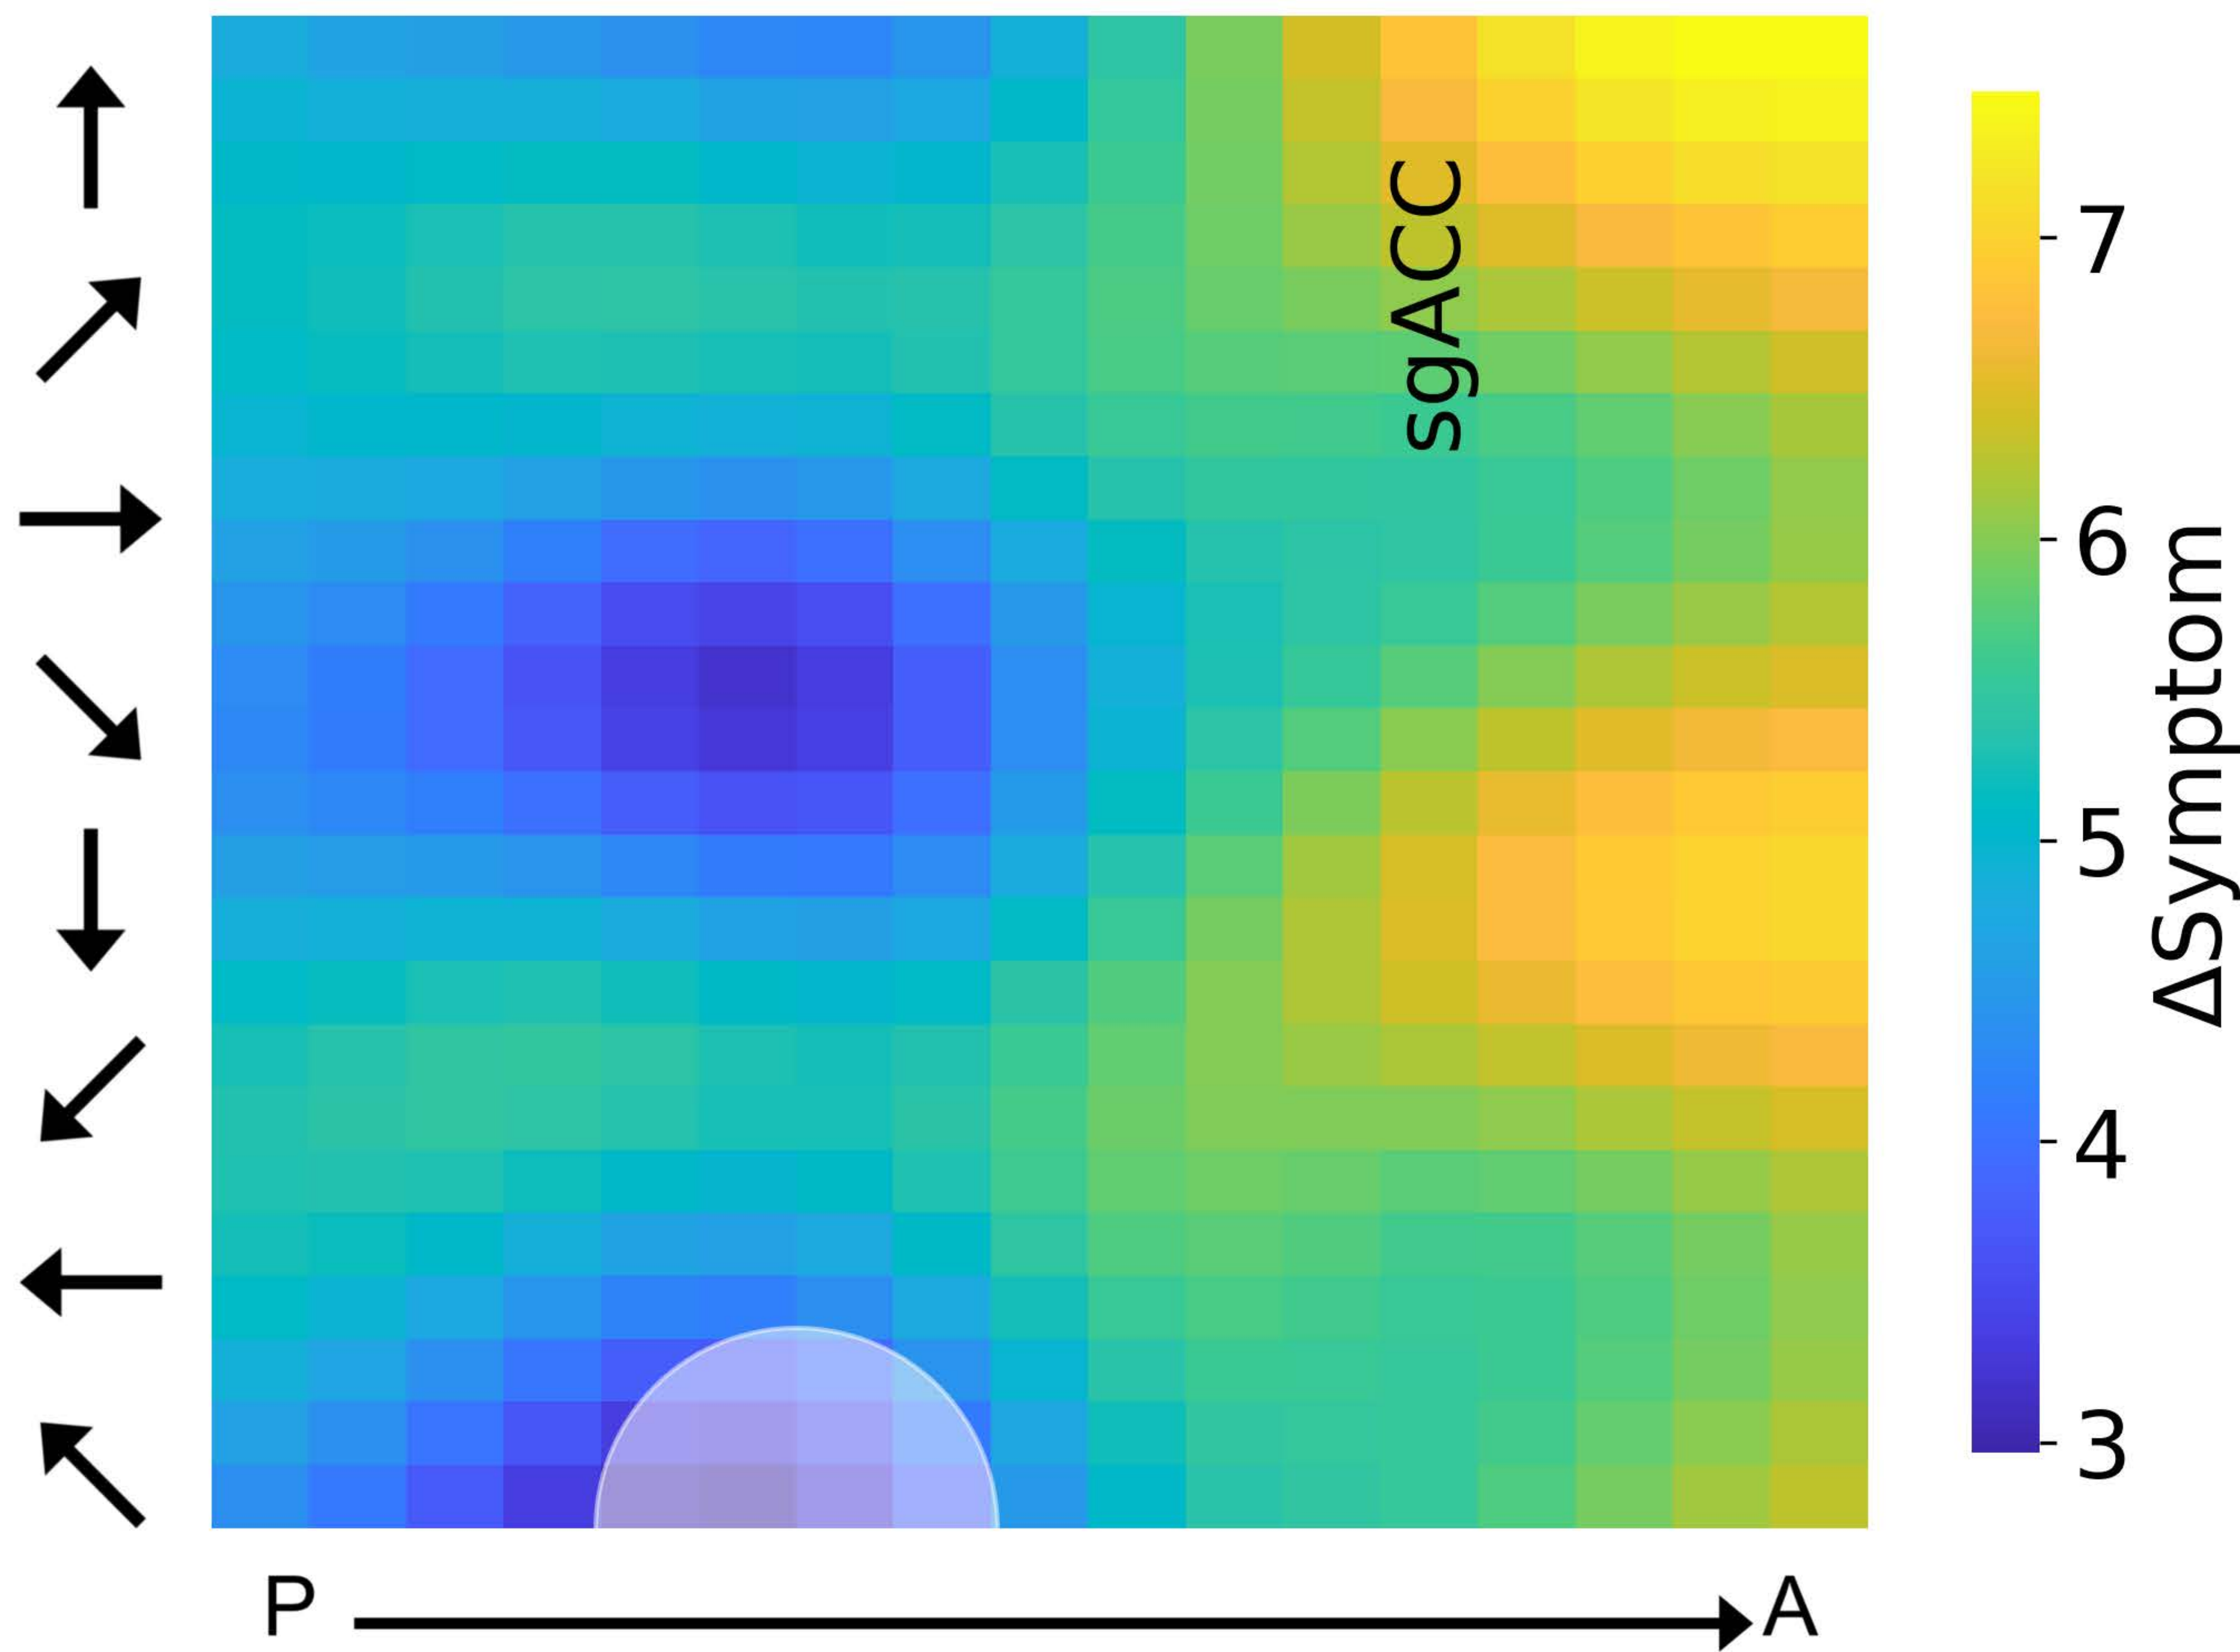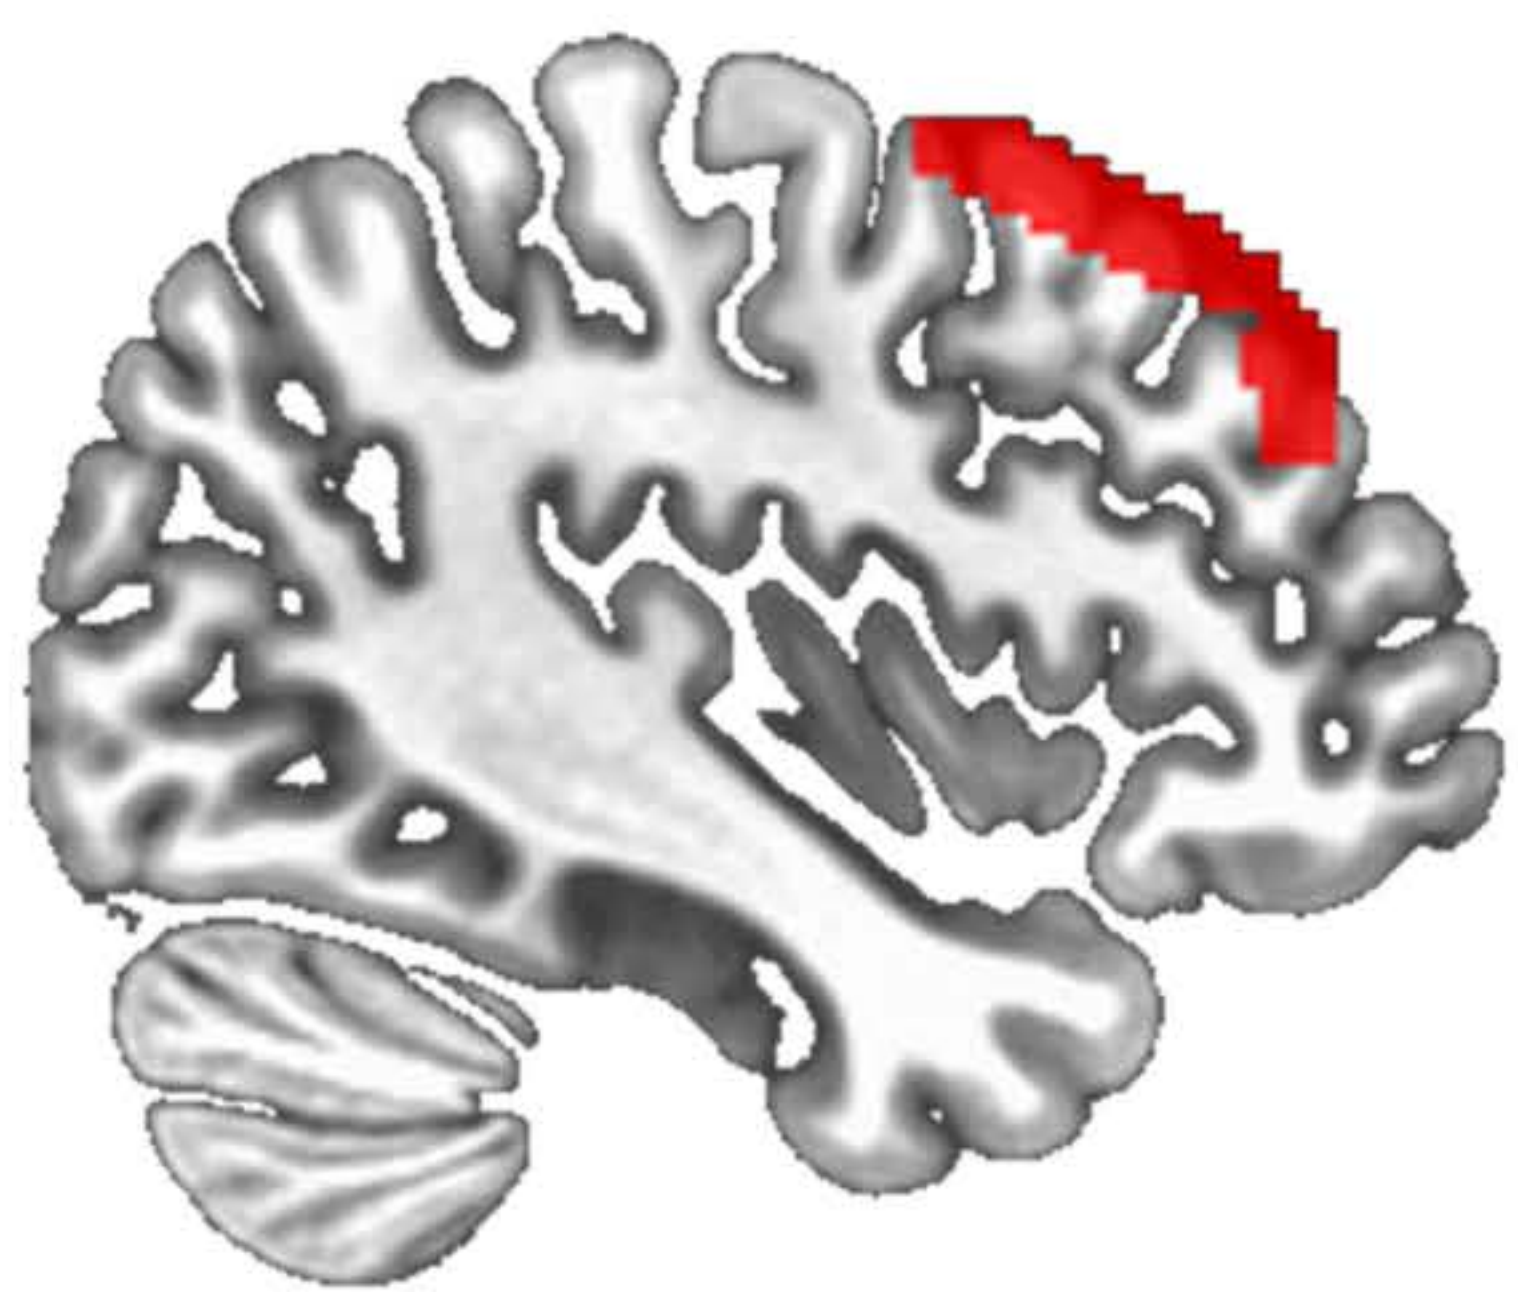



# INDAREW484UCJ\_madrs\_right\_dlpfc

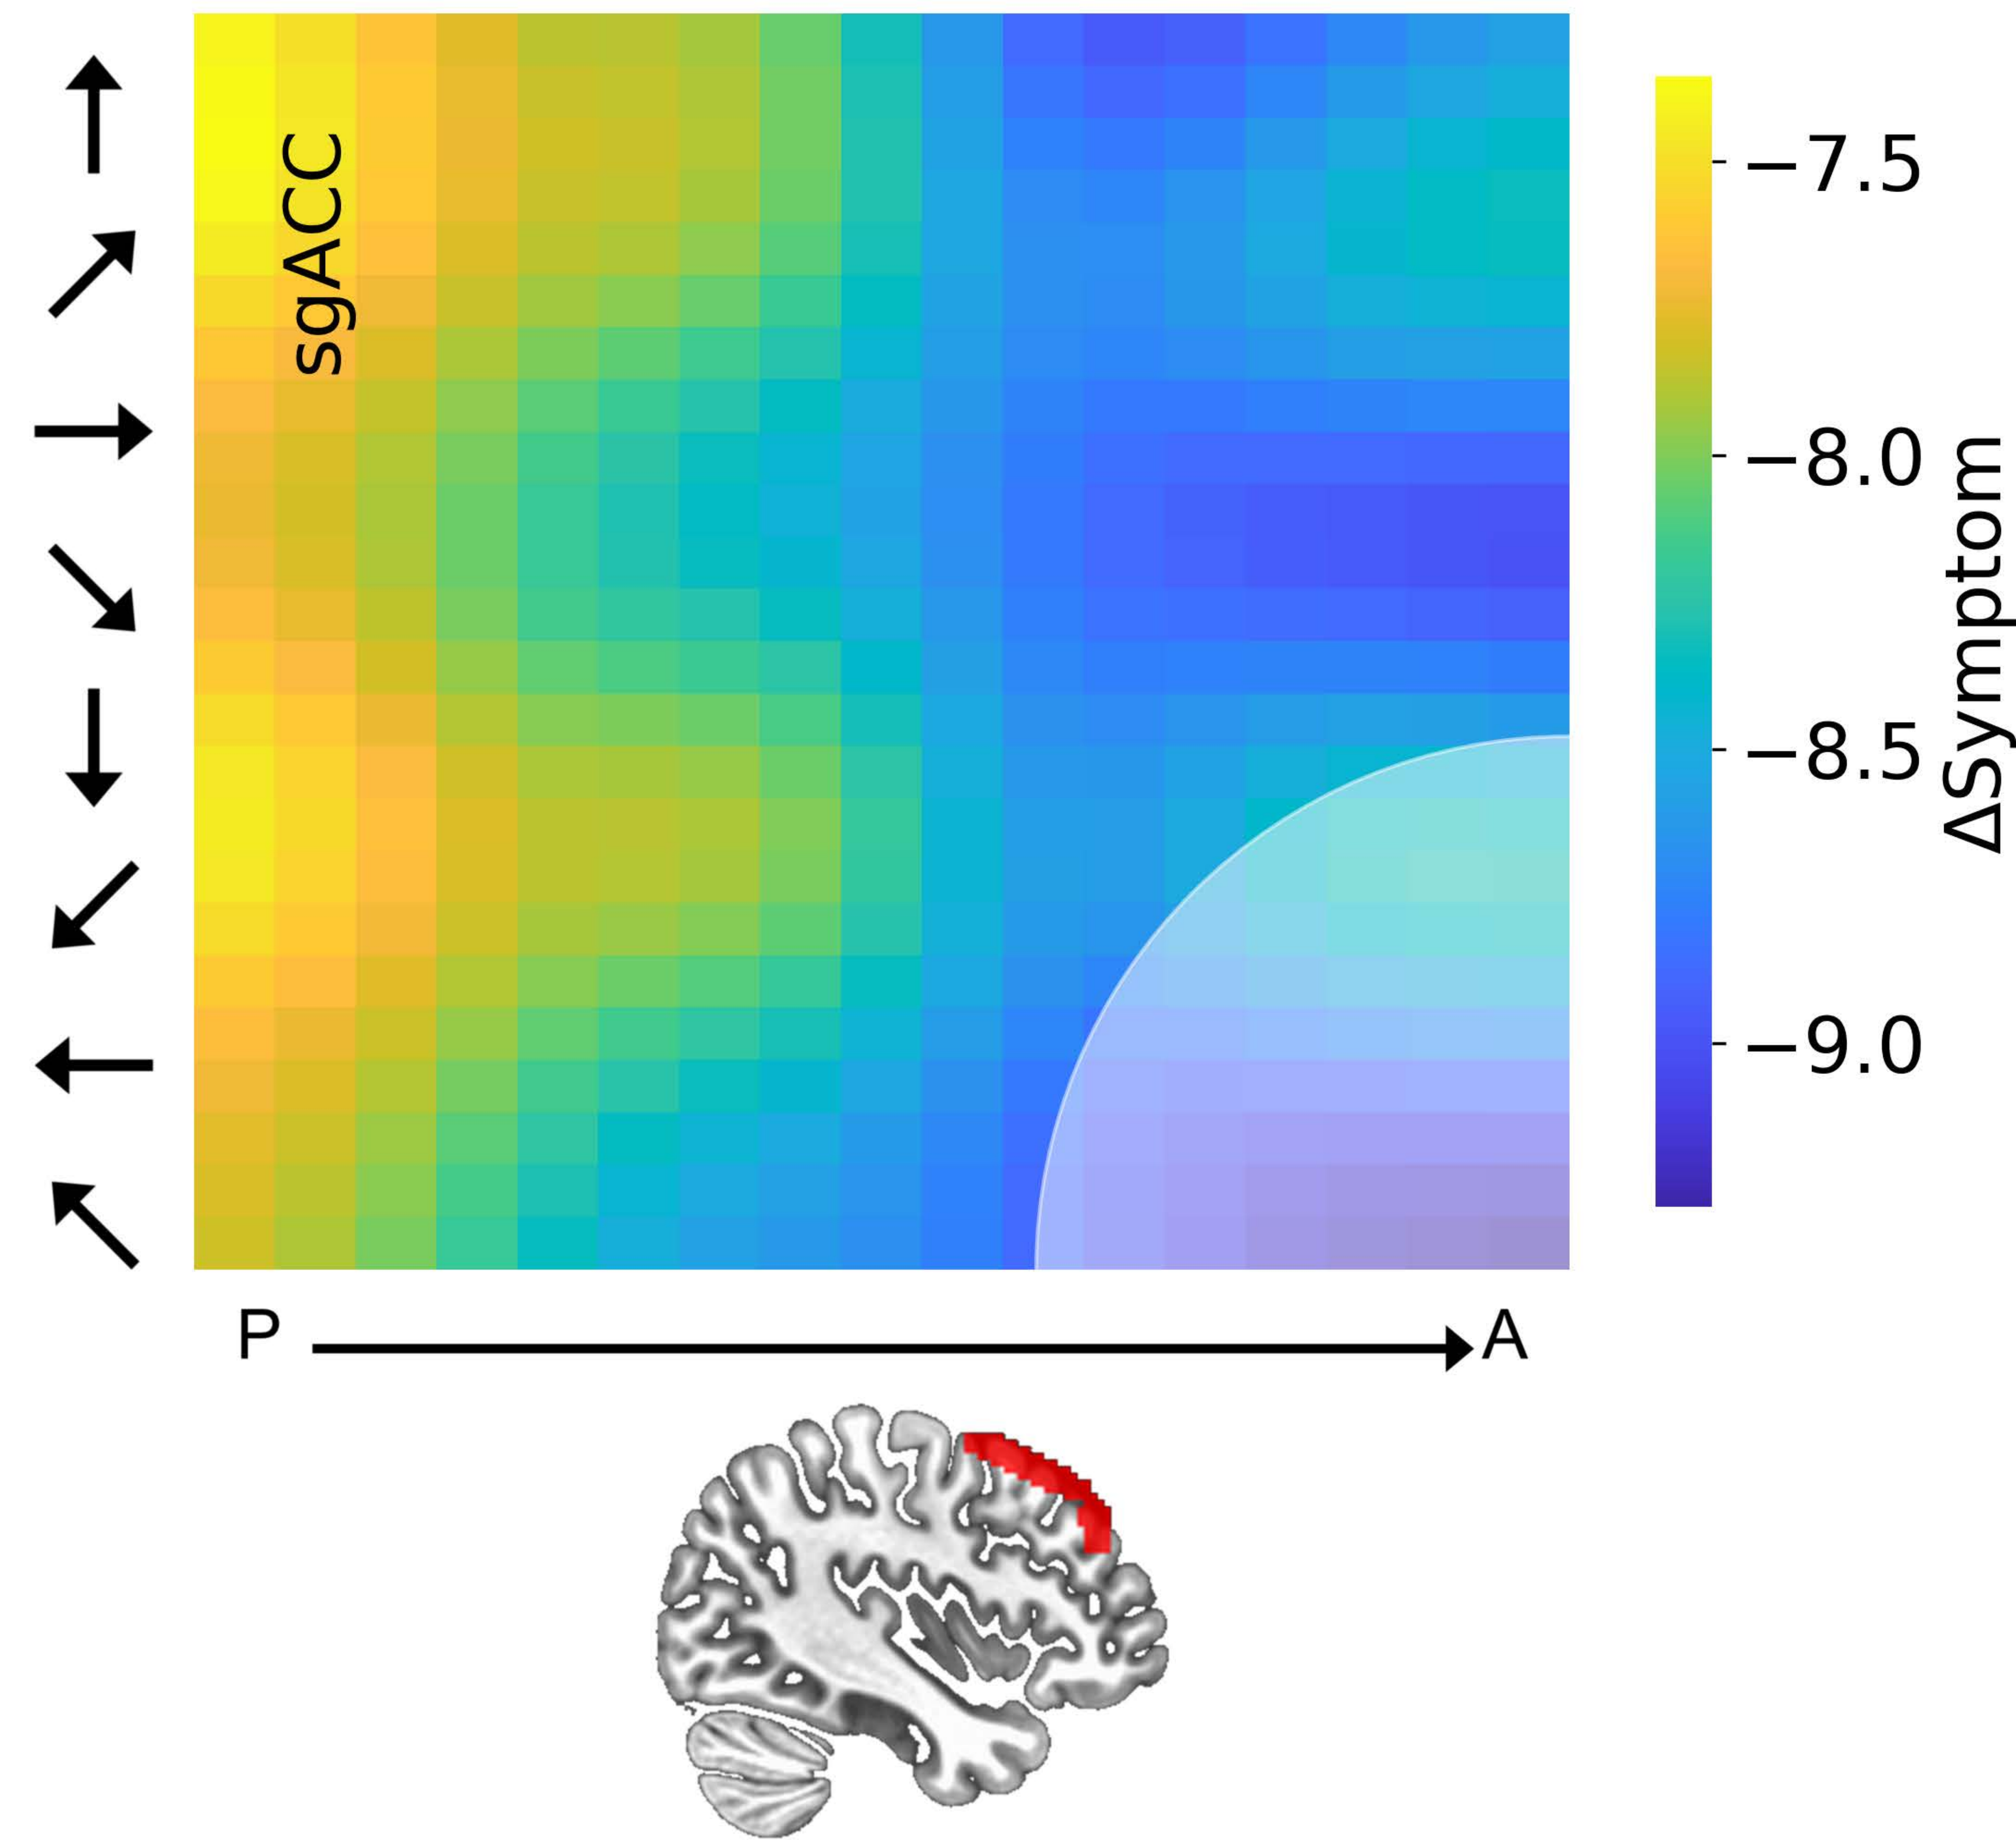



# NDAREZ915JK5\_madrs\_right\_dlpfc

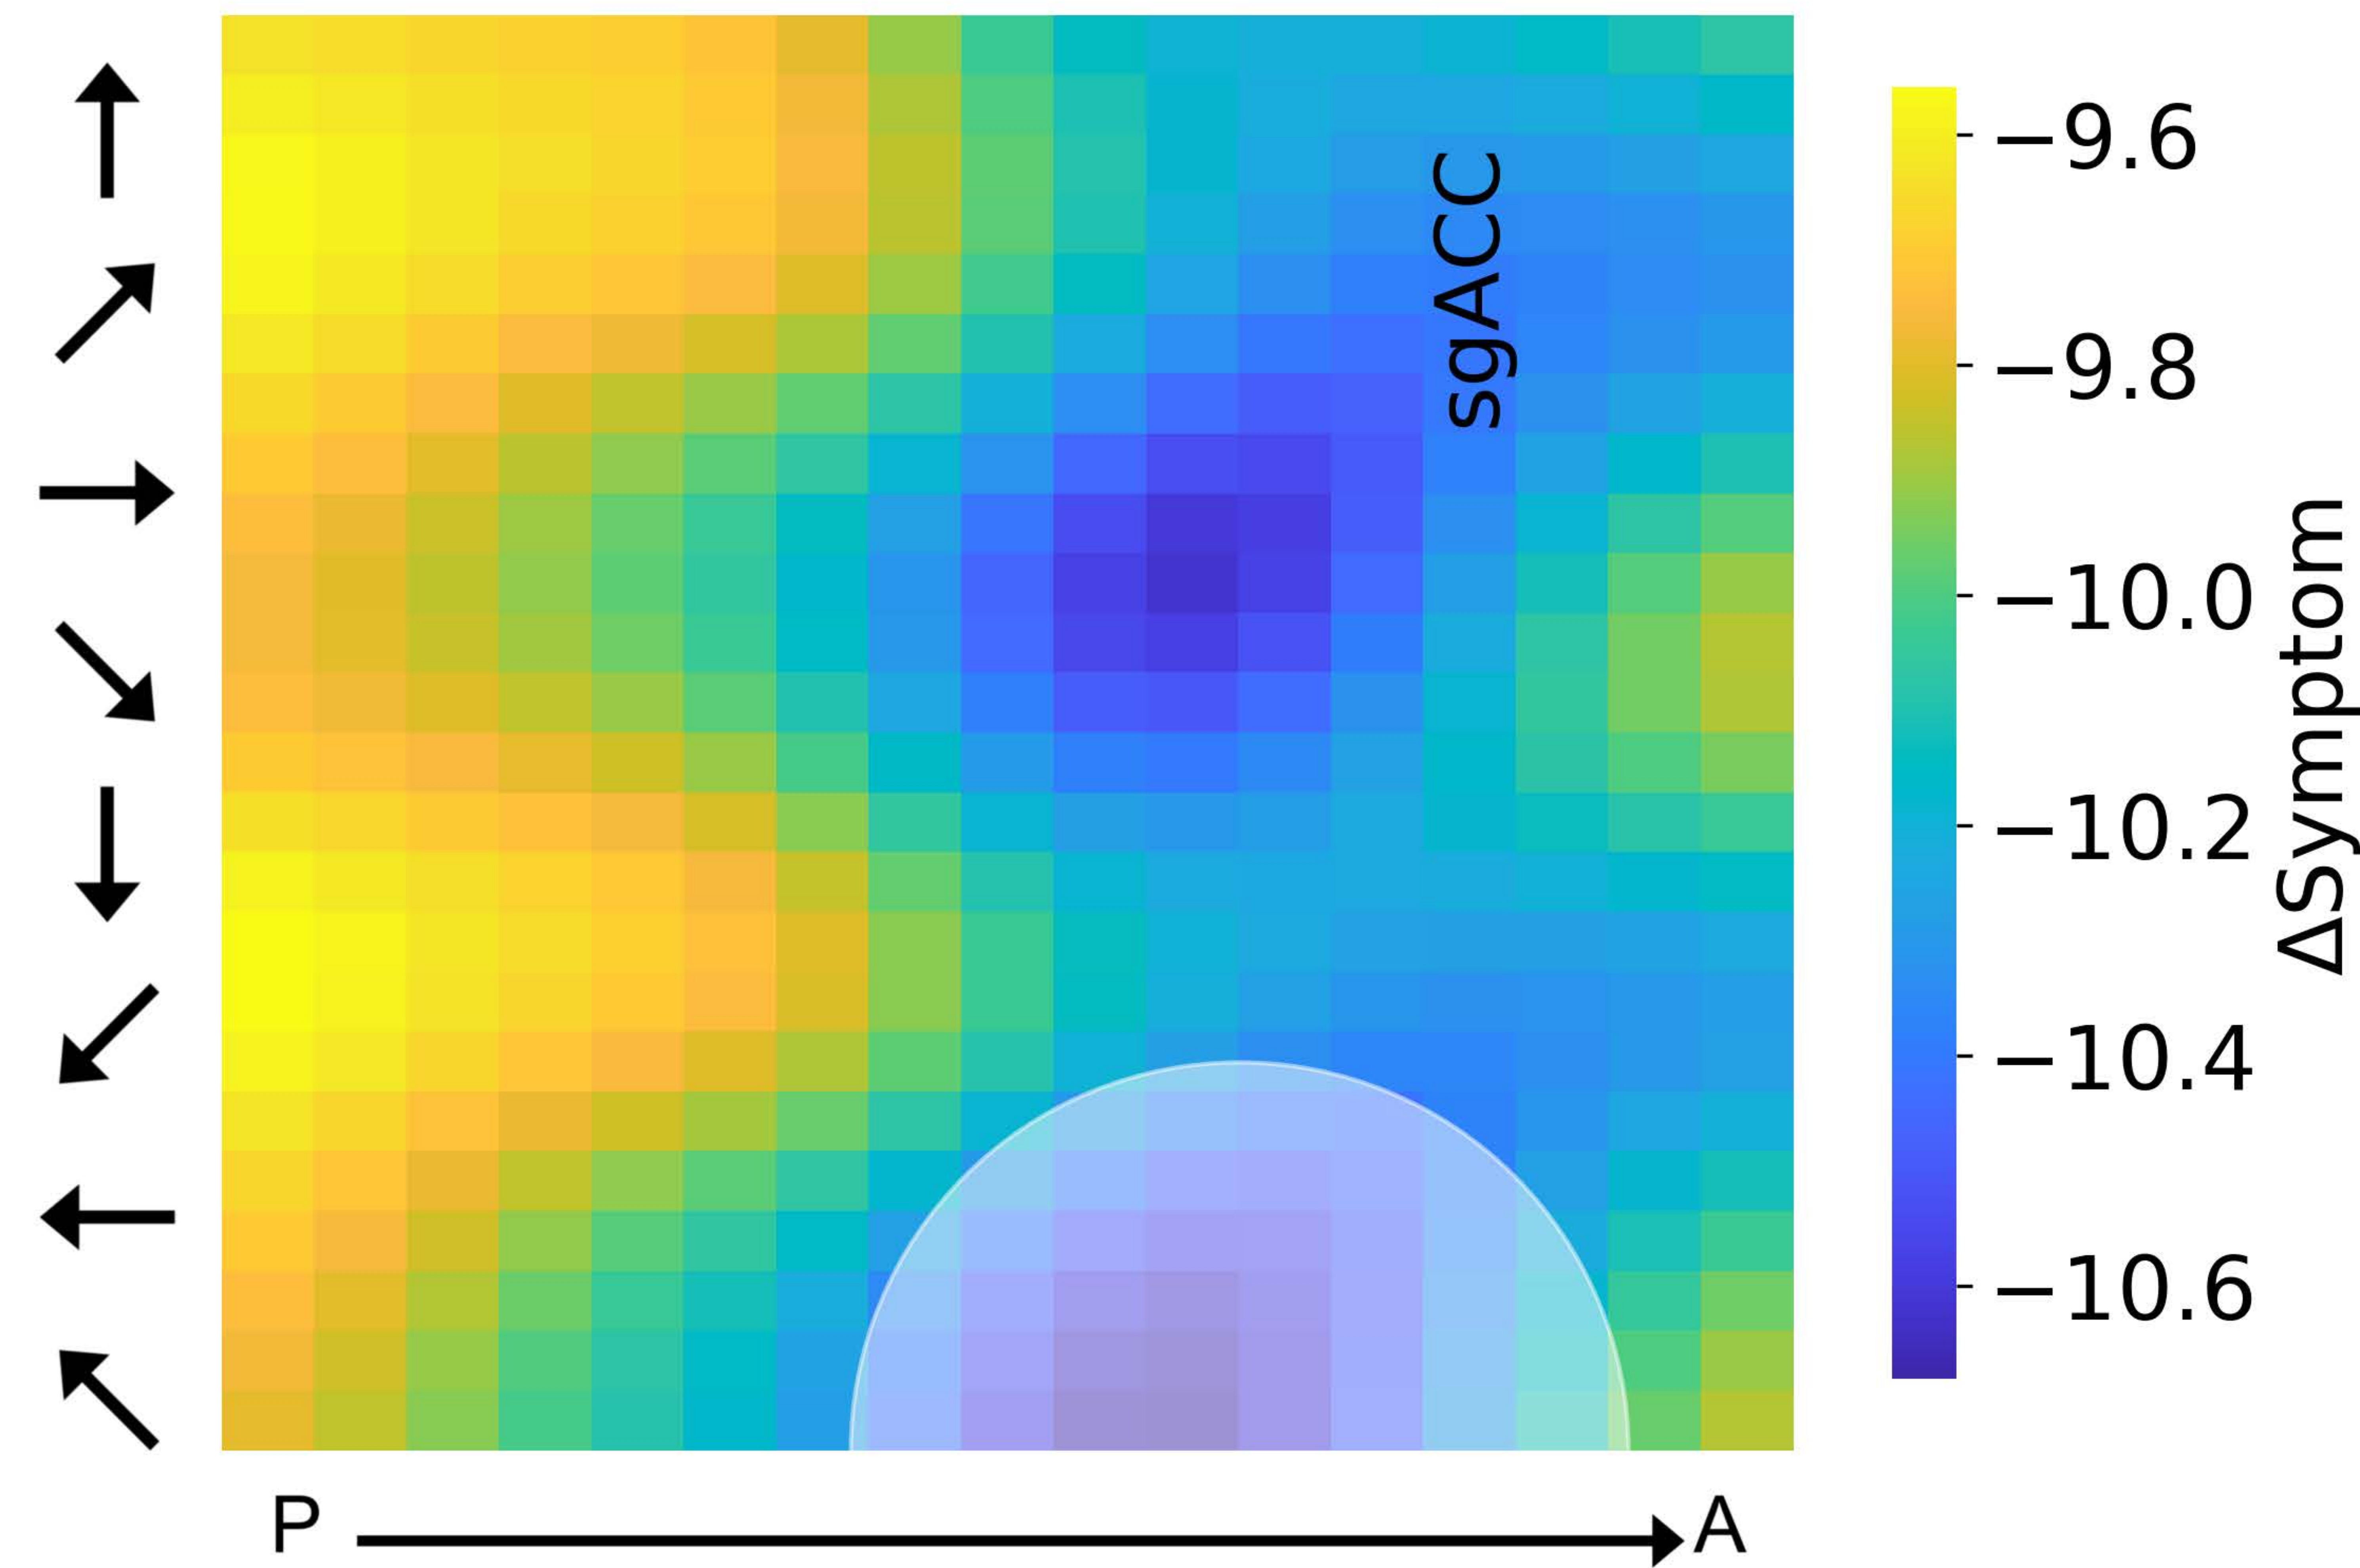



# INDARFH525MFZ\_madrs\_right\_dlpfc

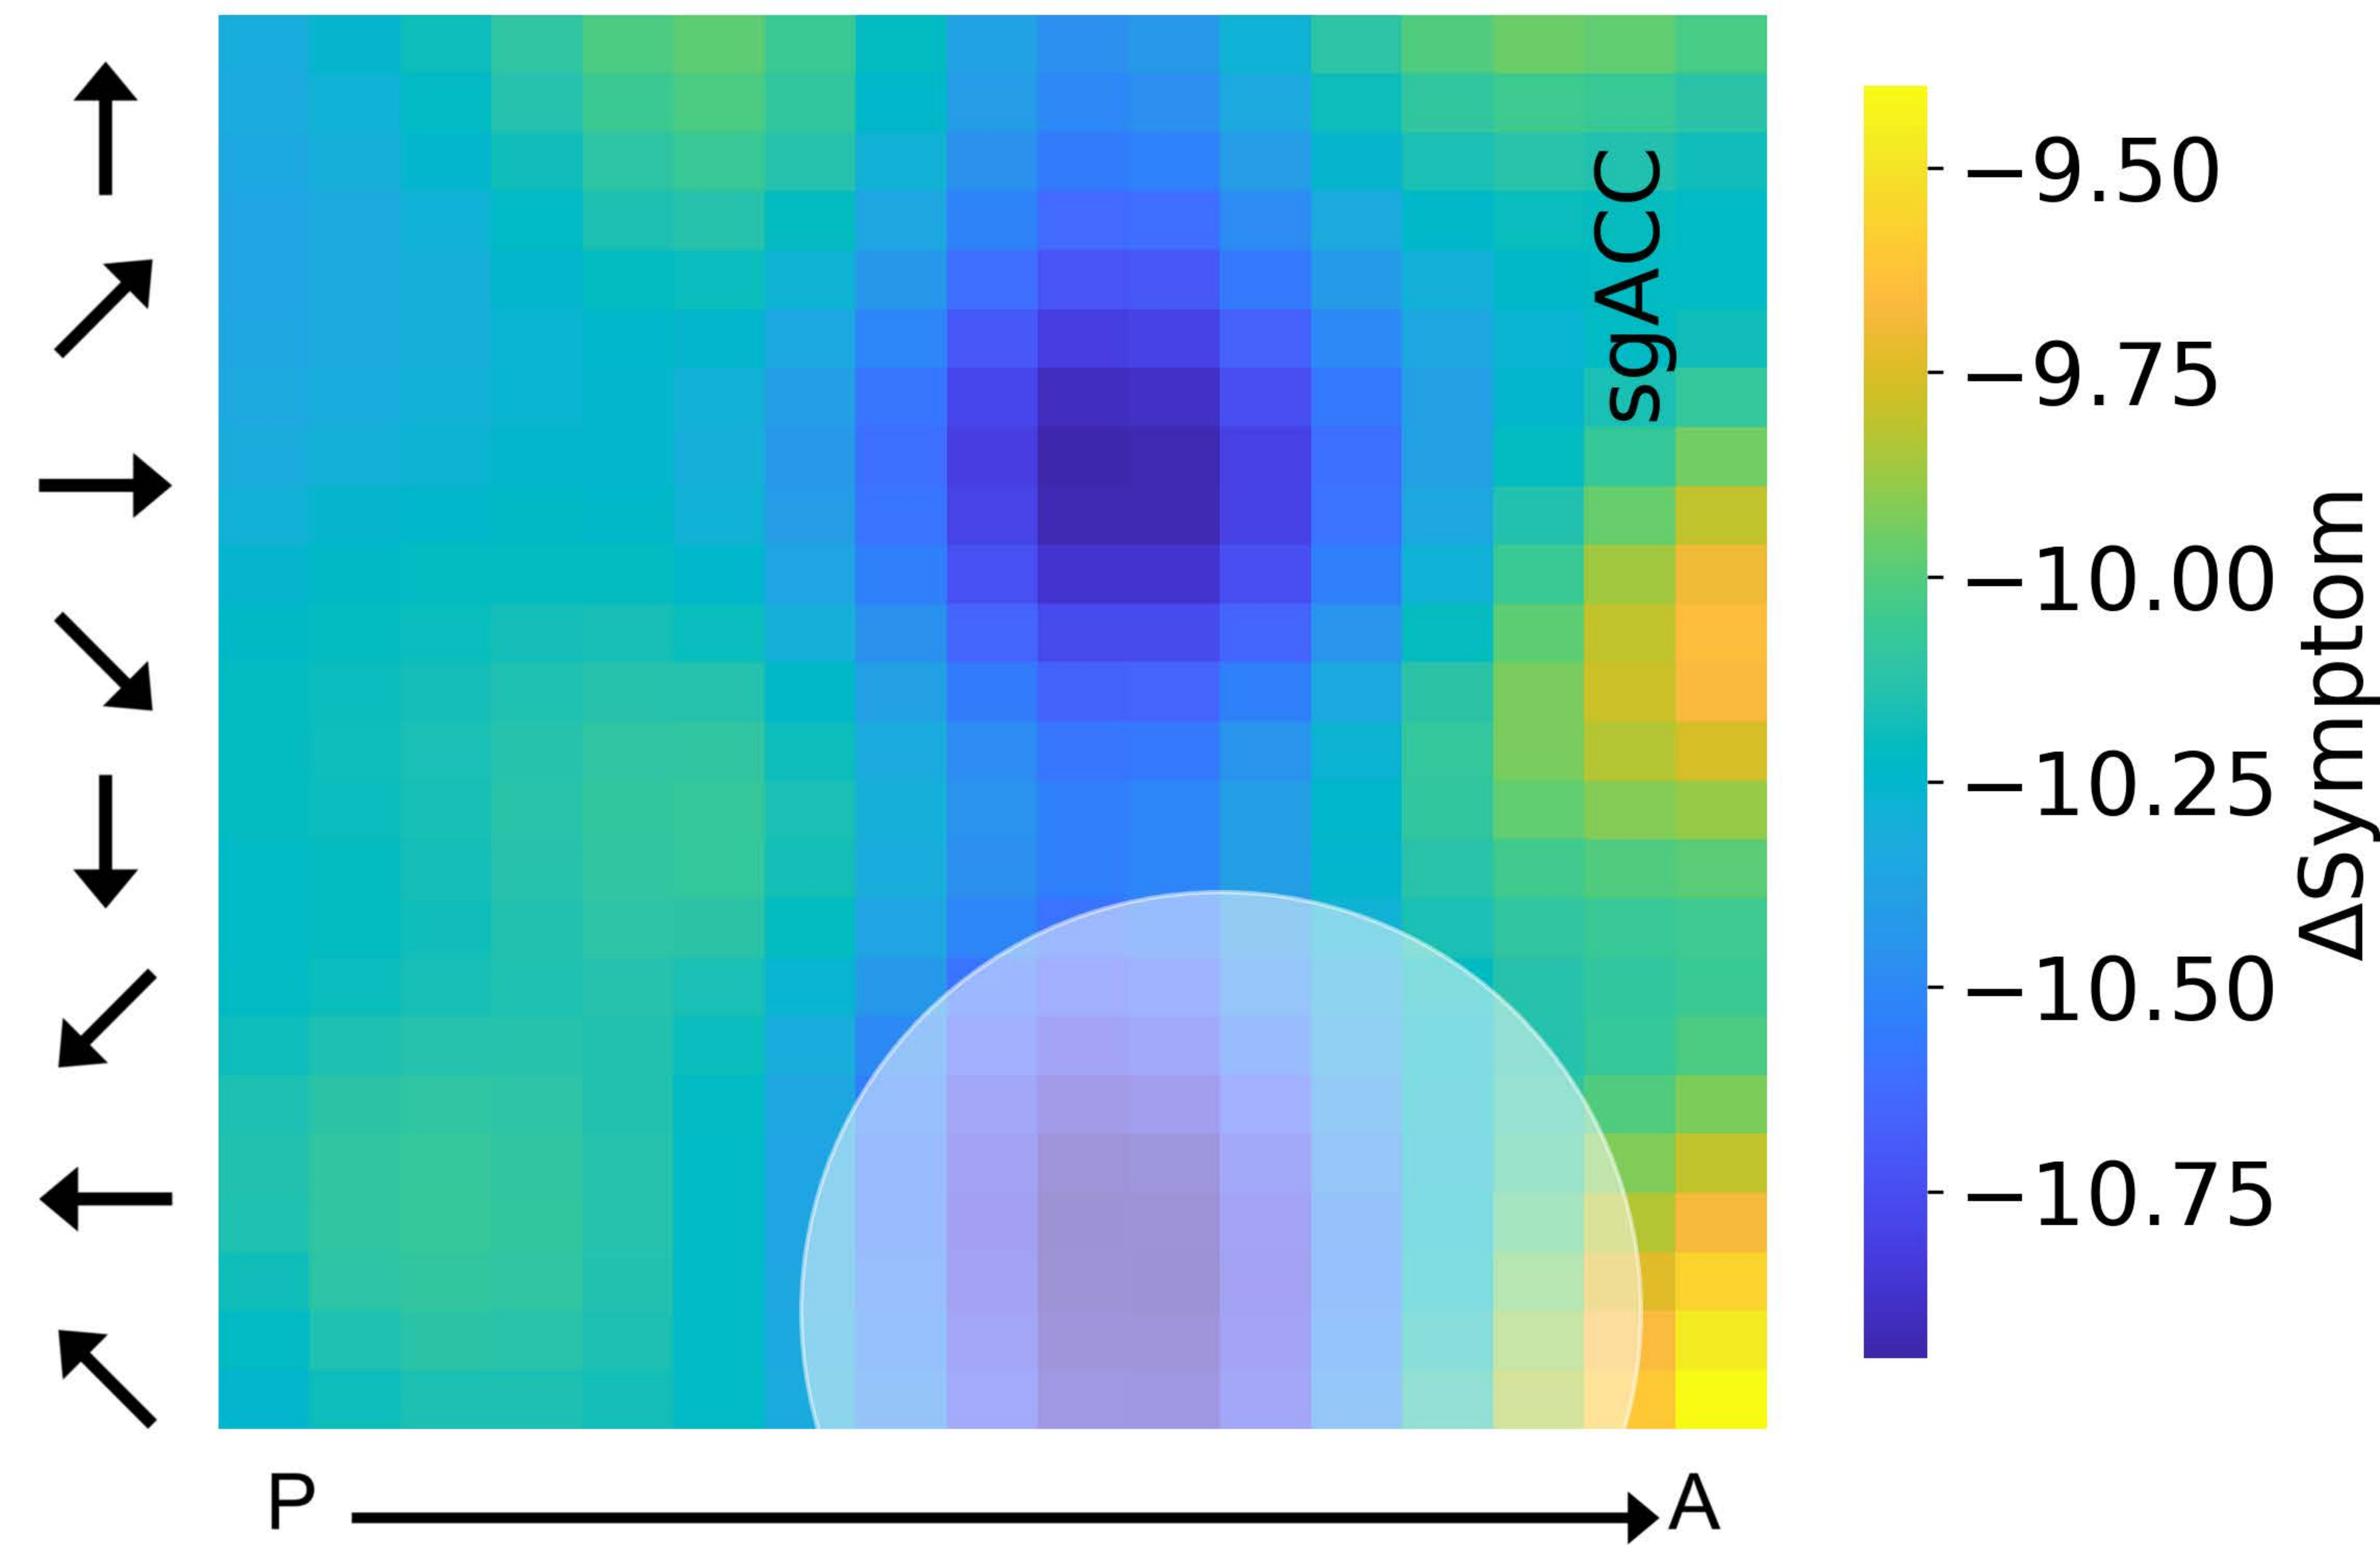



# INDARFR746ENQ\_madrs\_right\_dlpfc

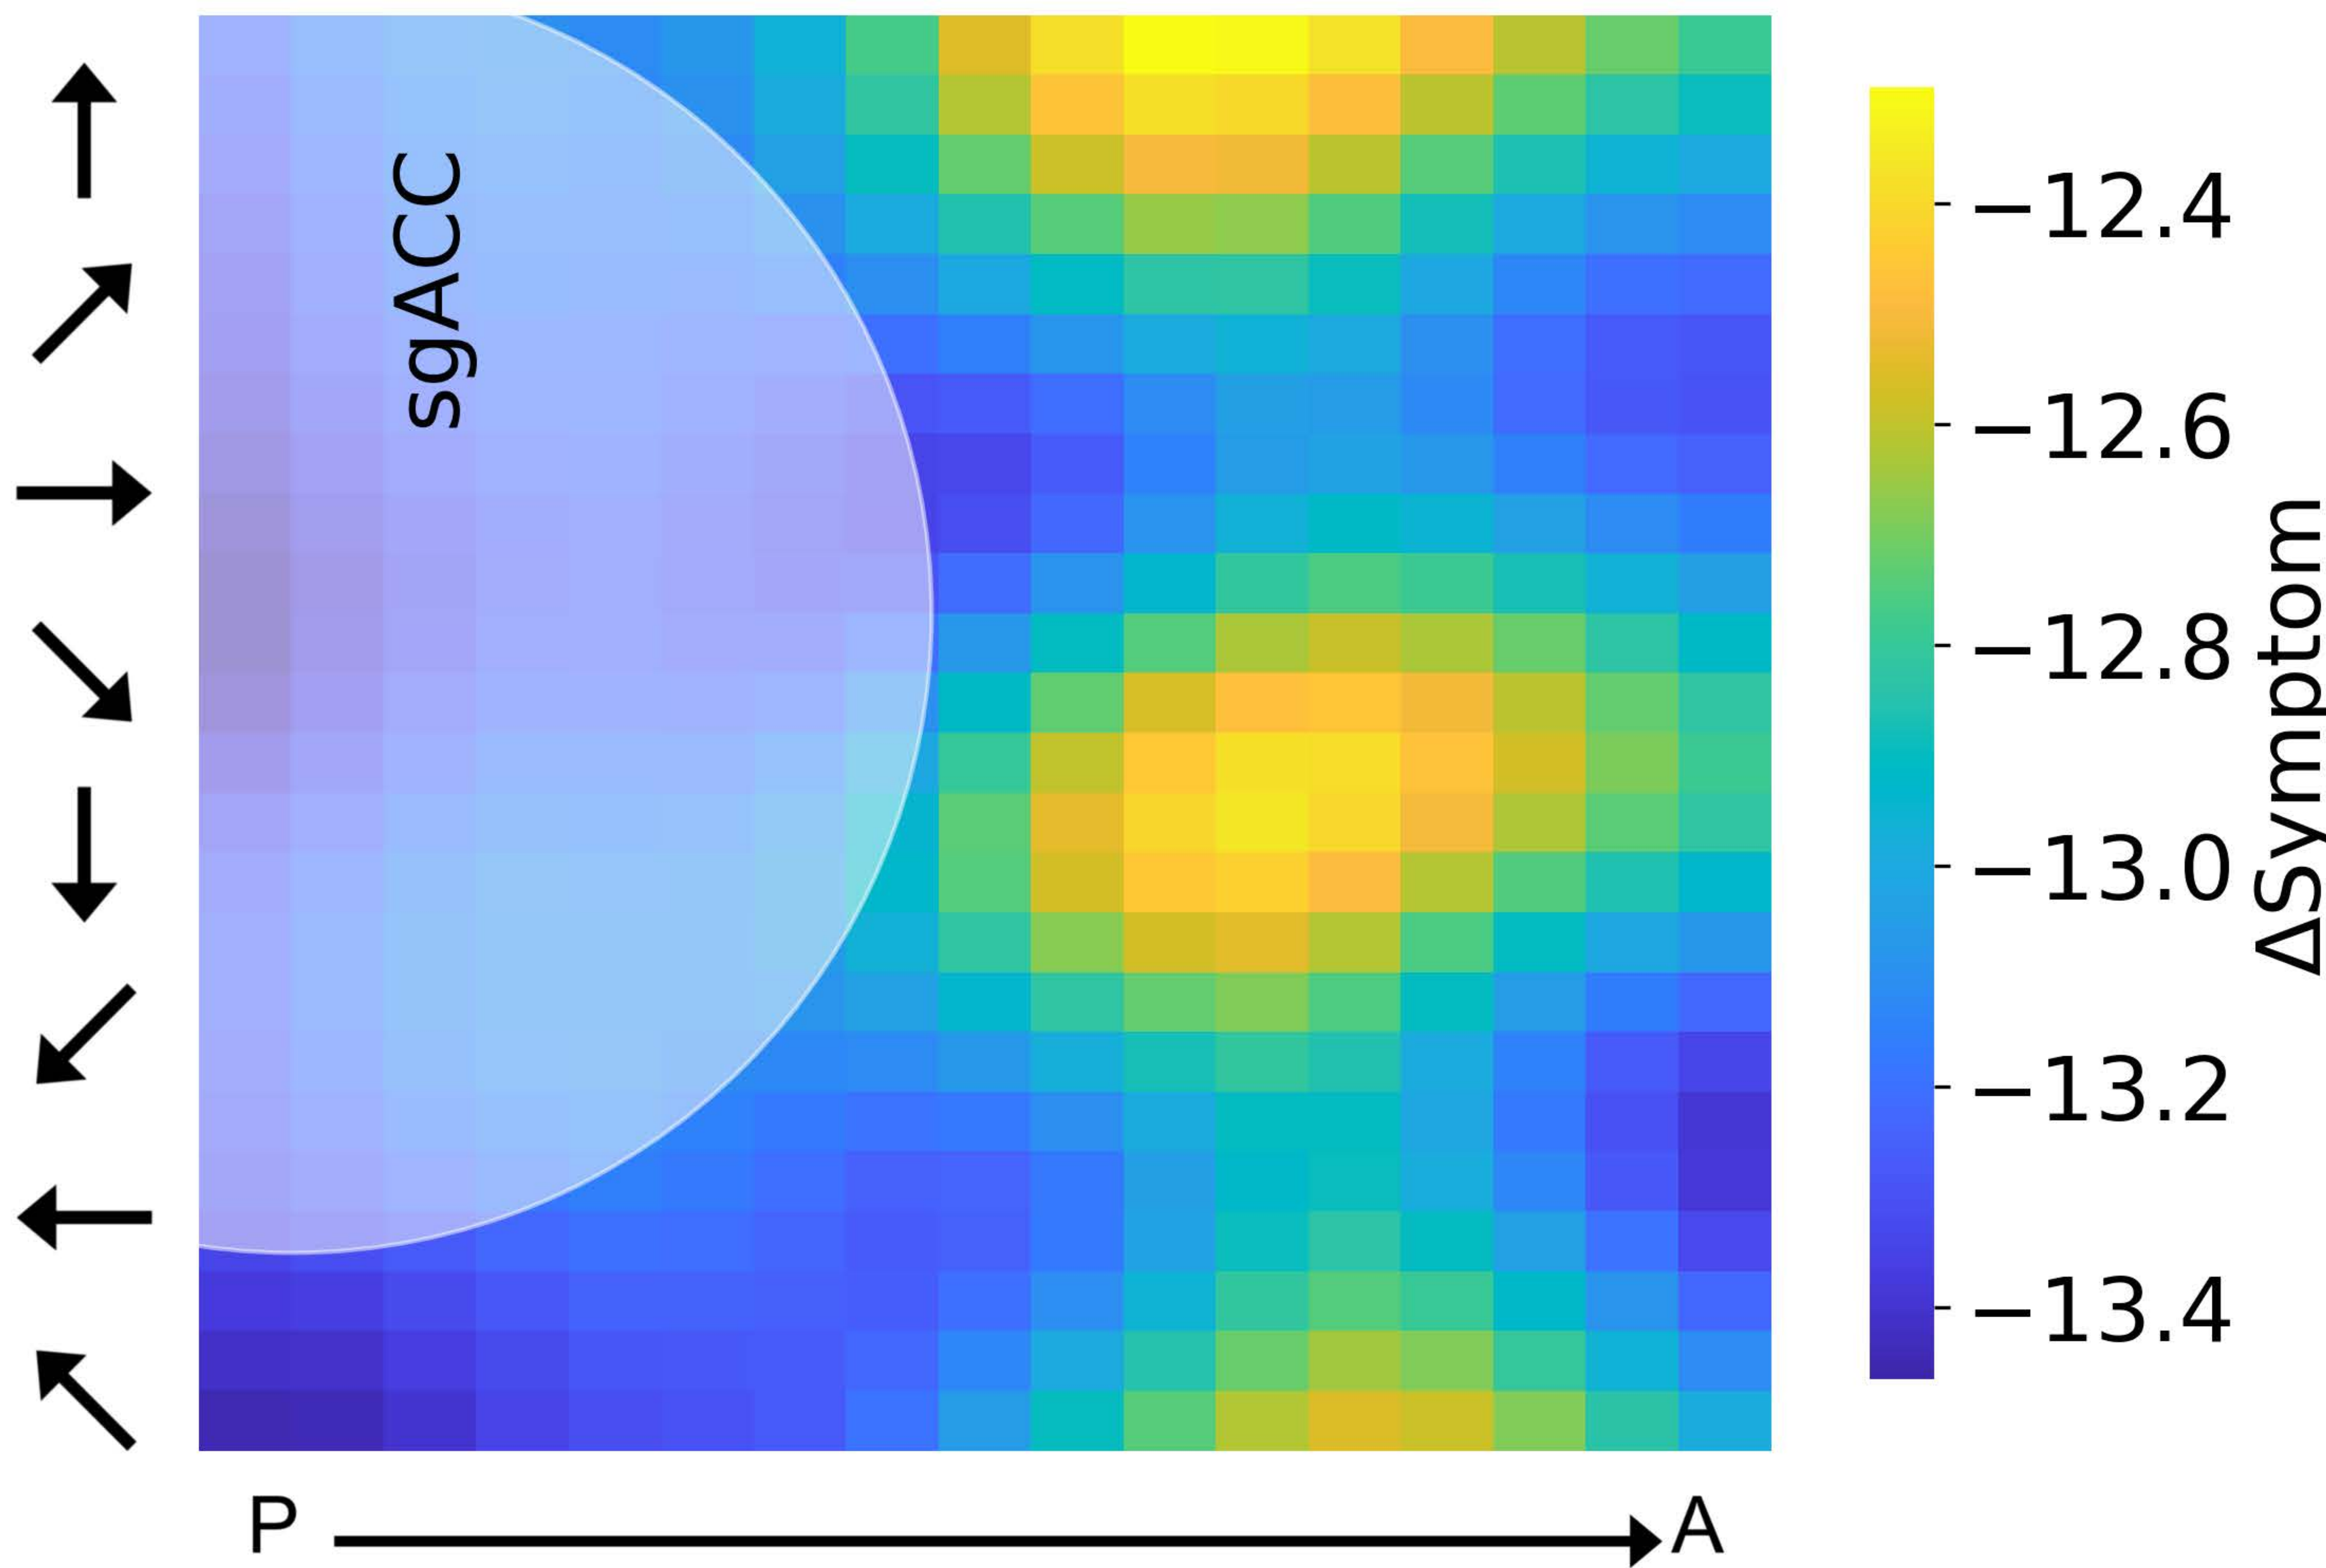



# INDARFW096LMD\_madrs\_right\_dlpfc

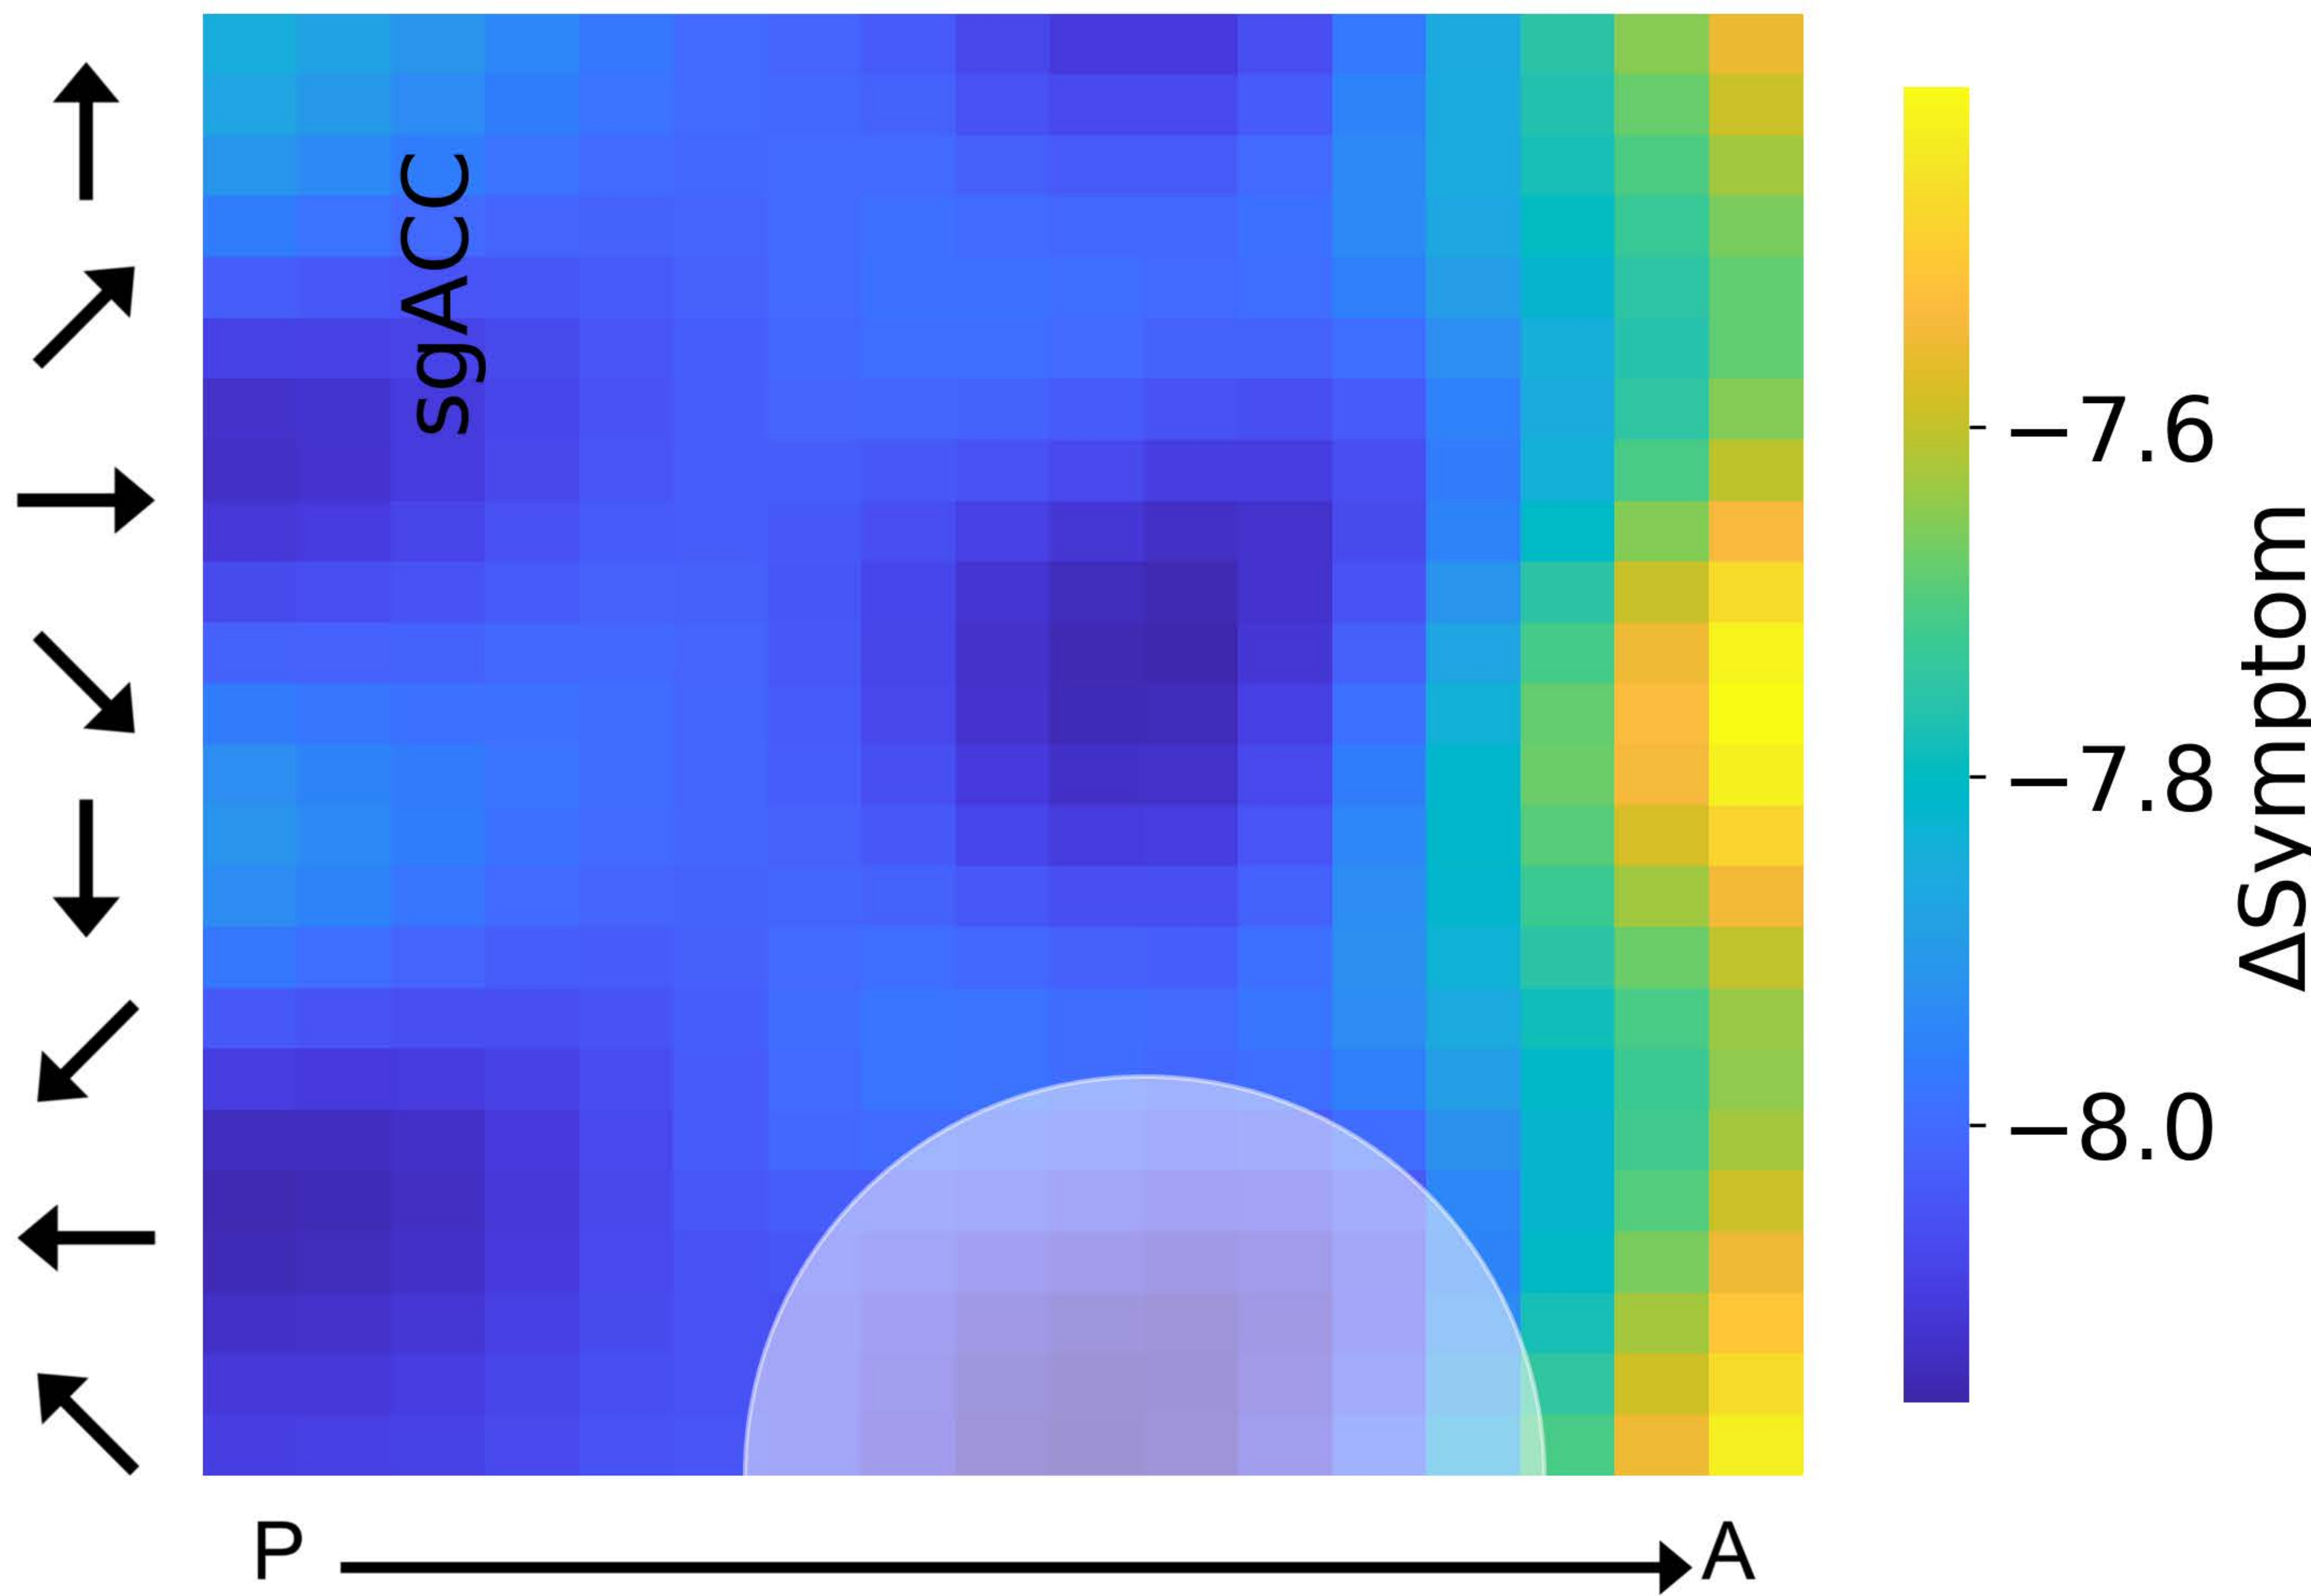



# NDARGH895WJJ\_madrs\_right\_dlpfc

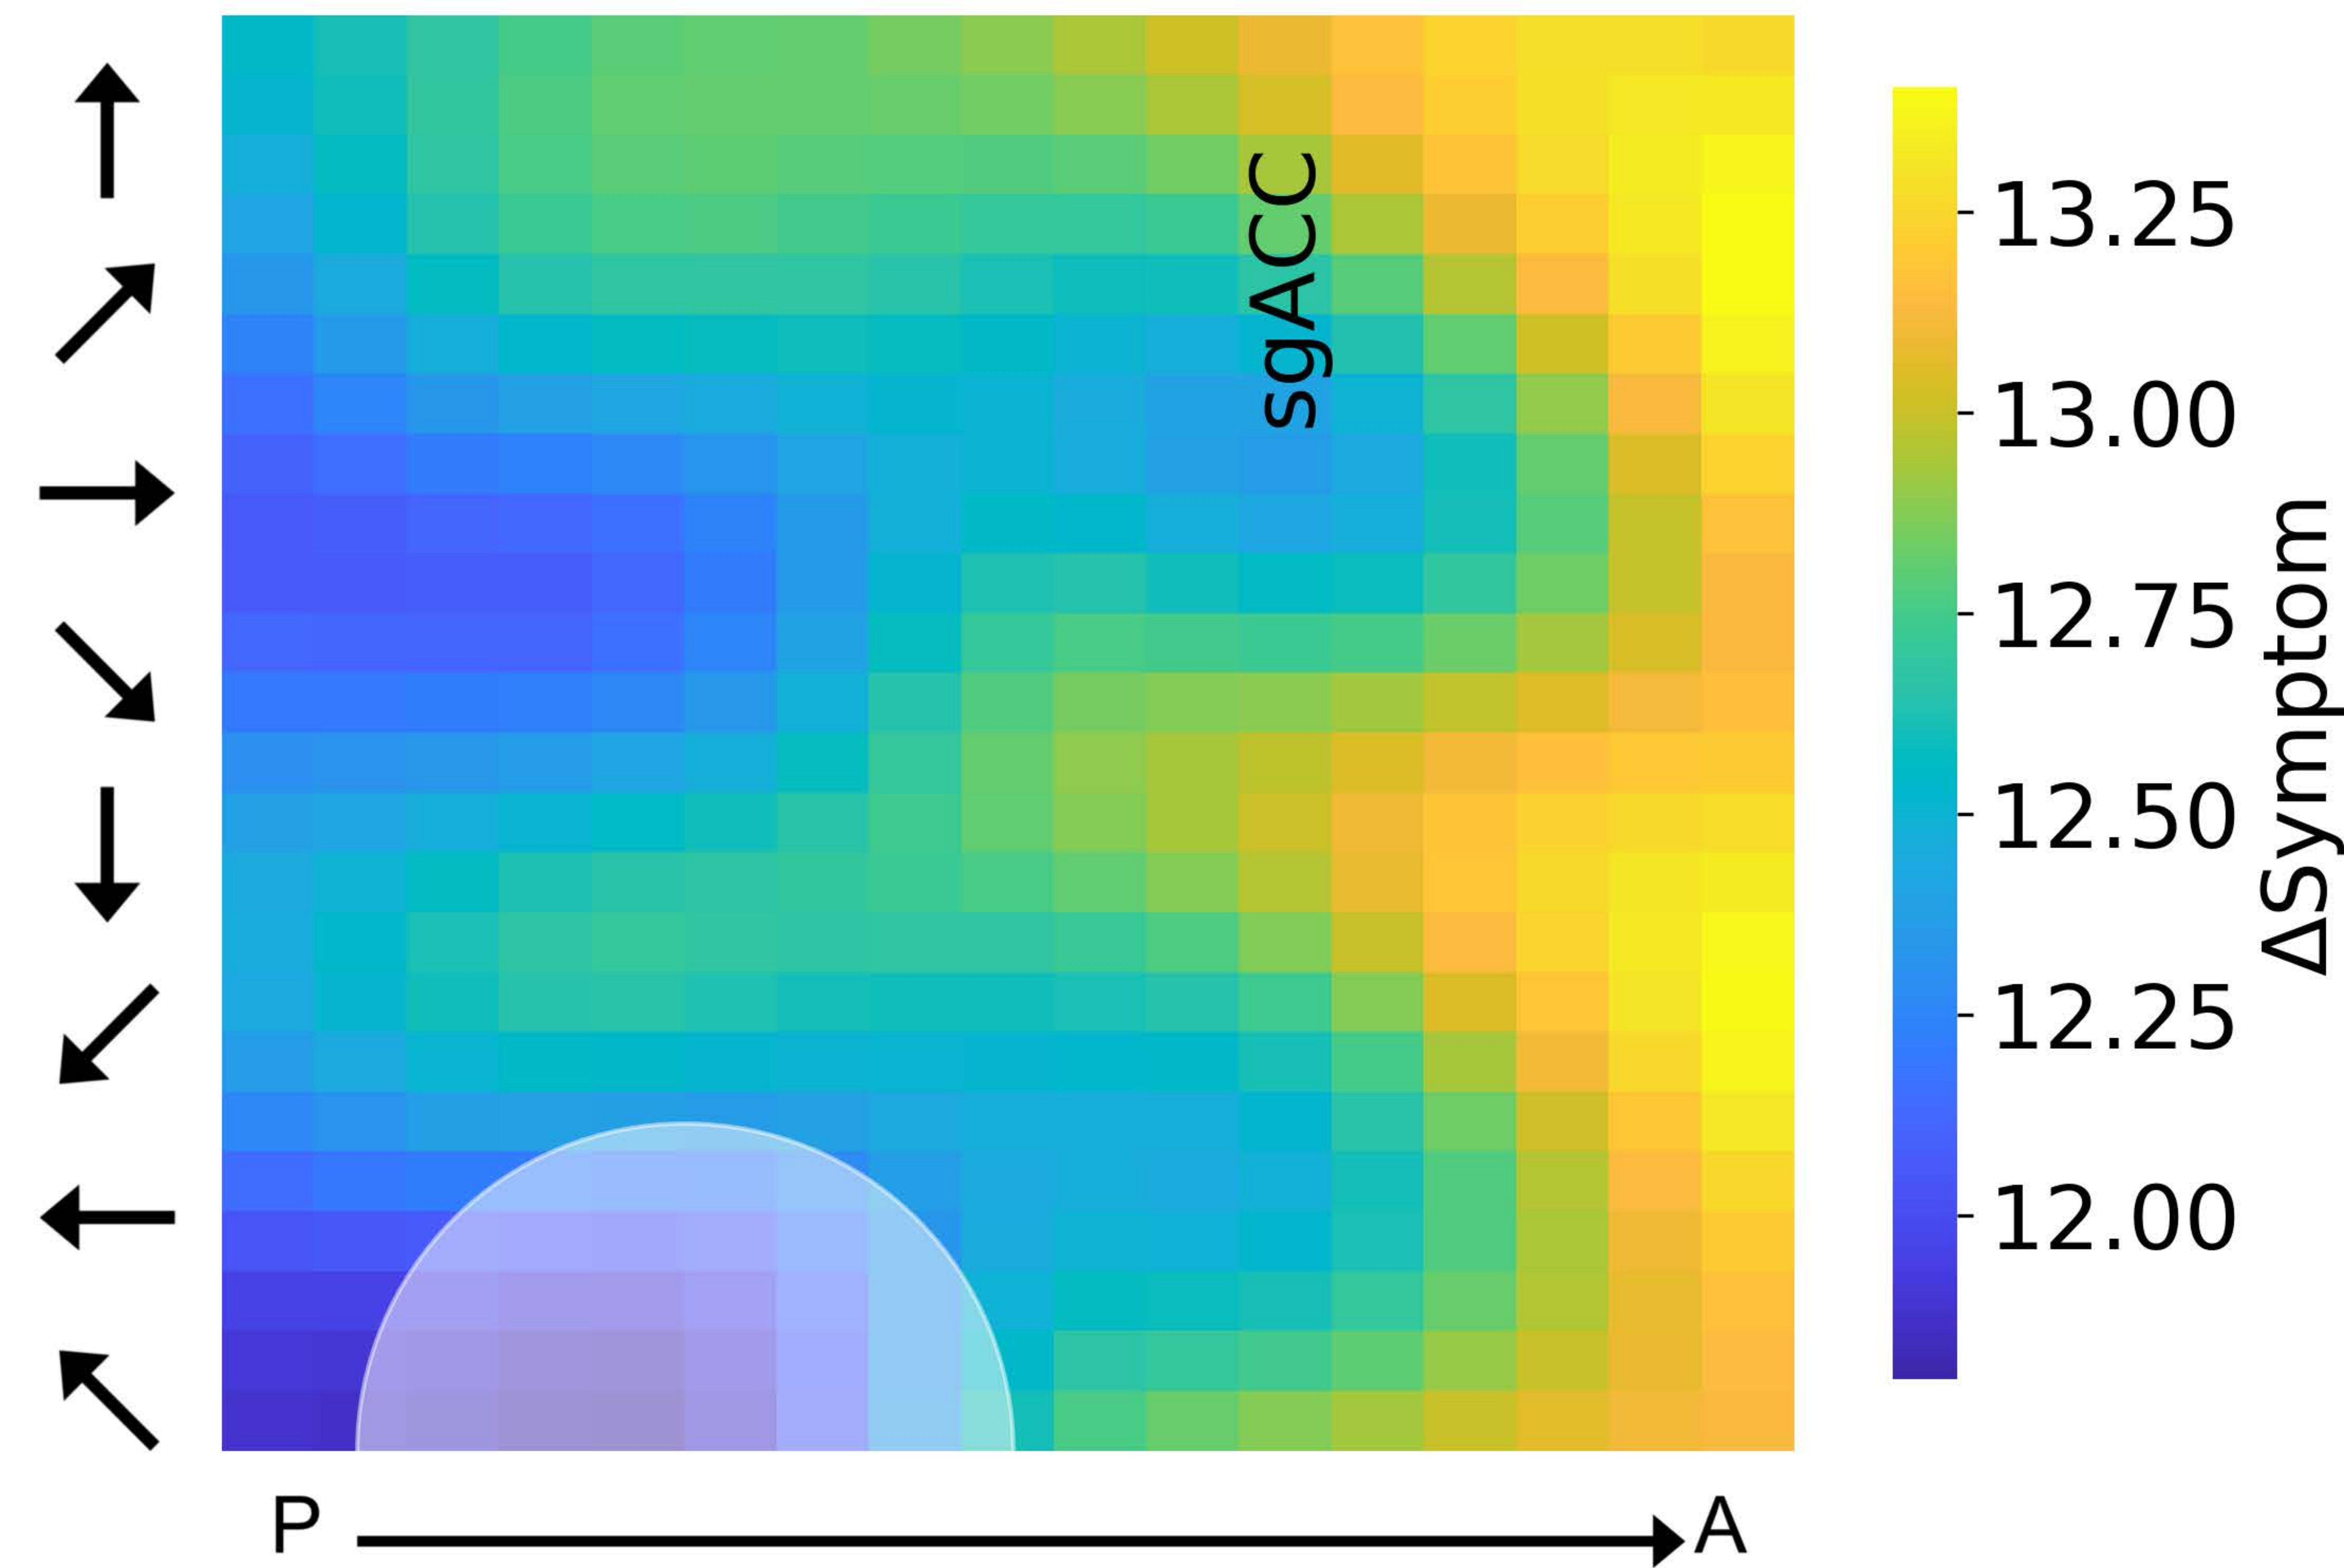



# NDARGR637FTT\_madrs\_right\_dlpfc

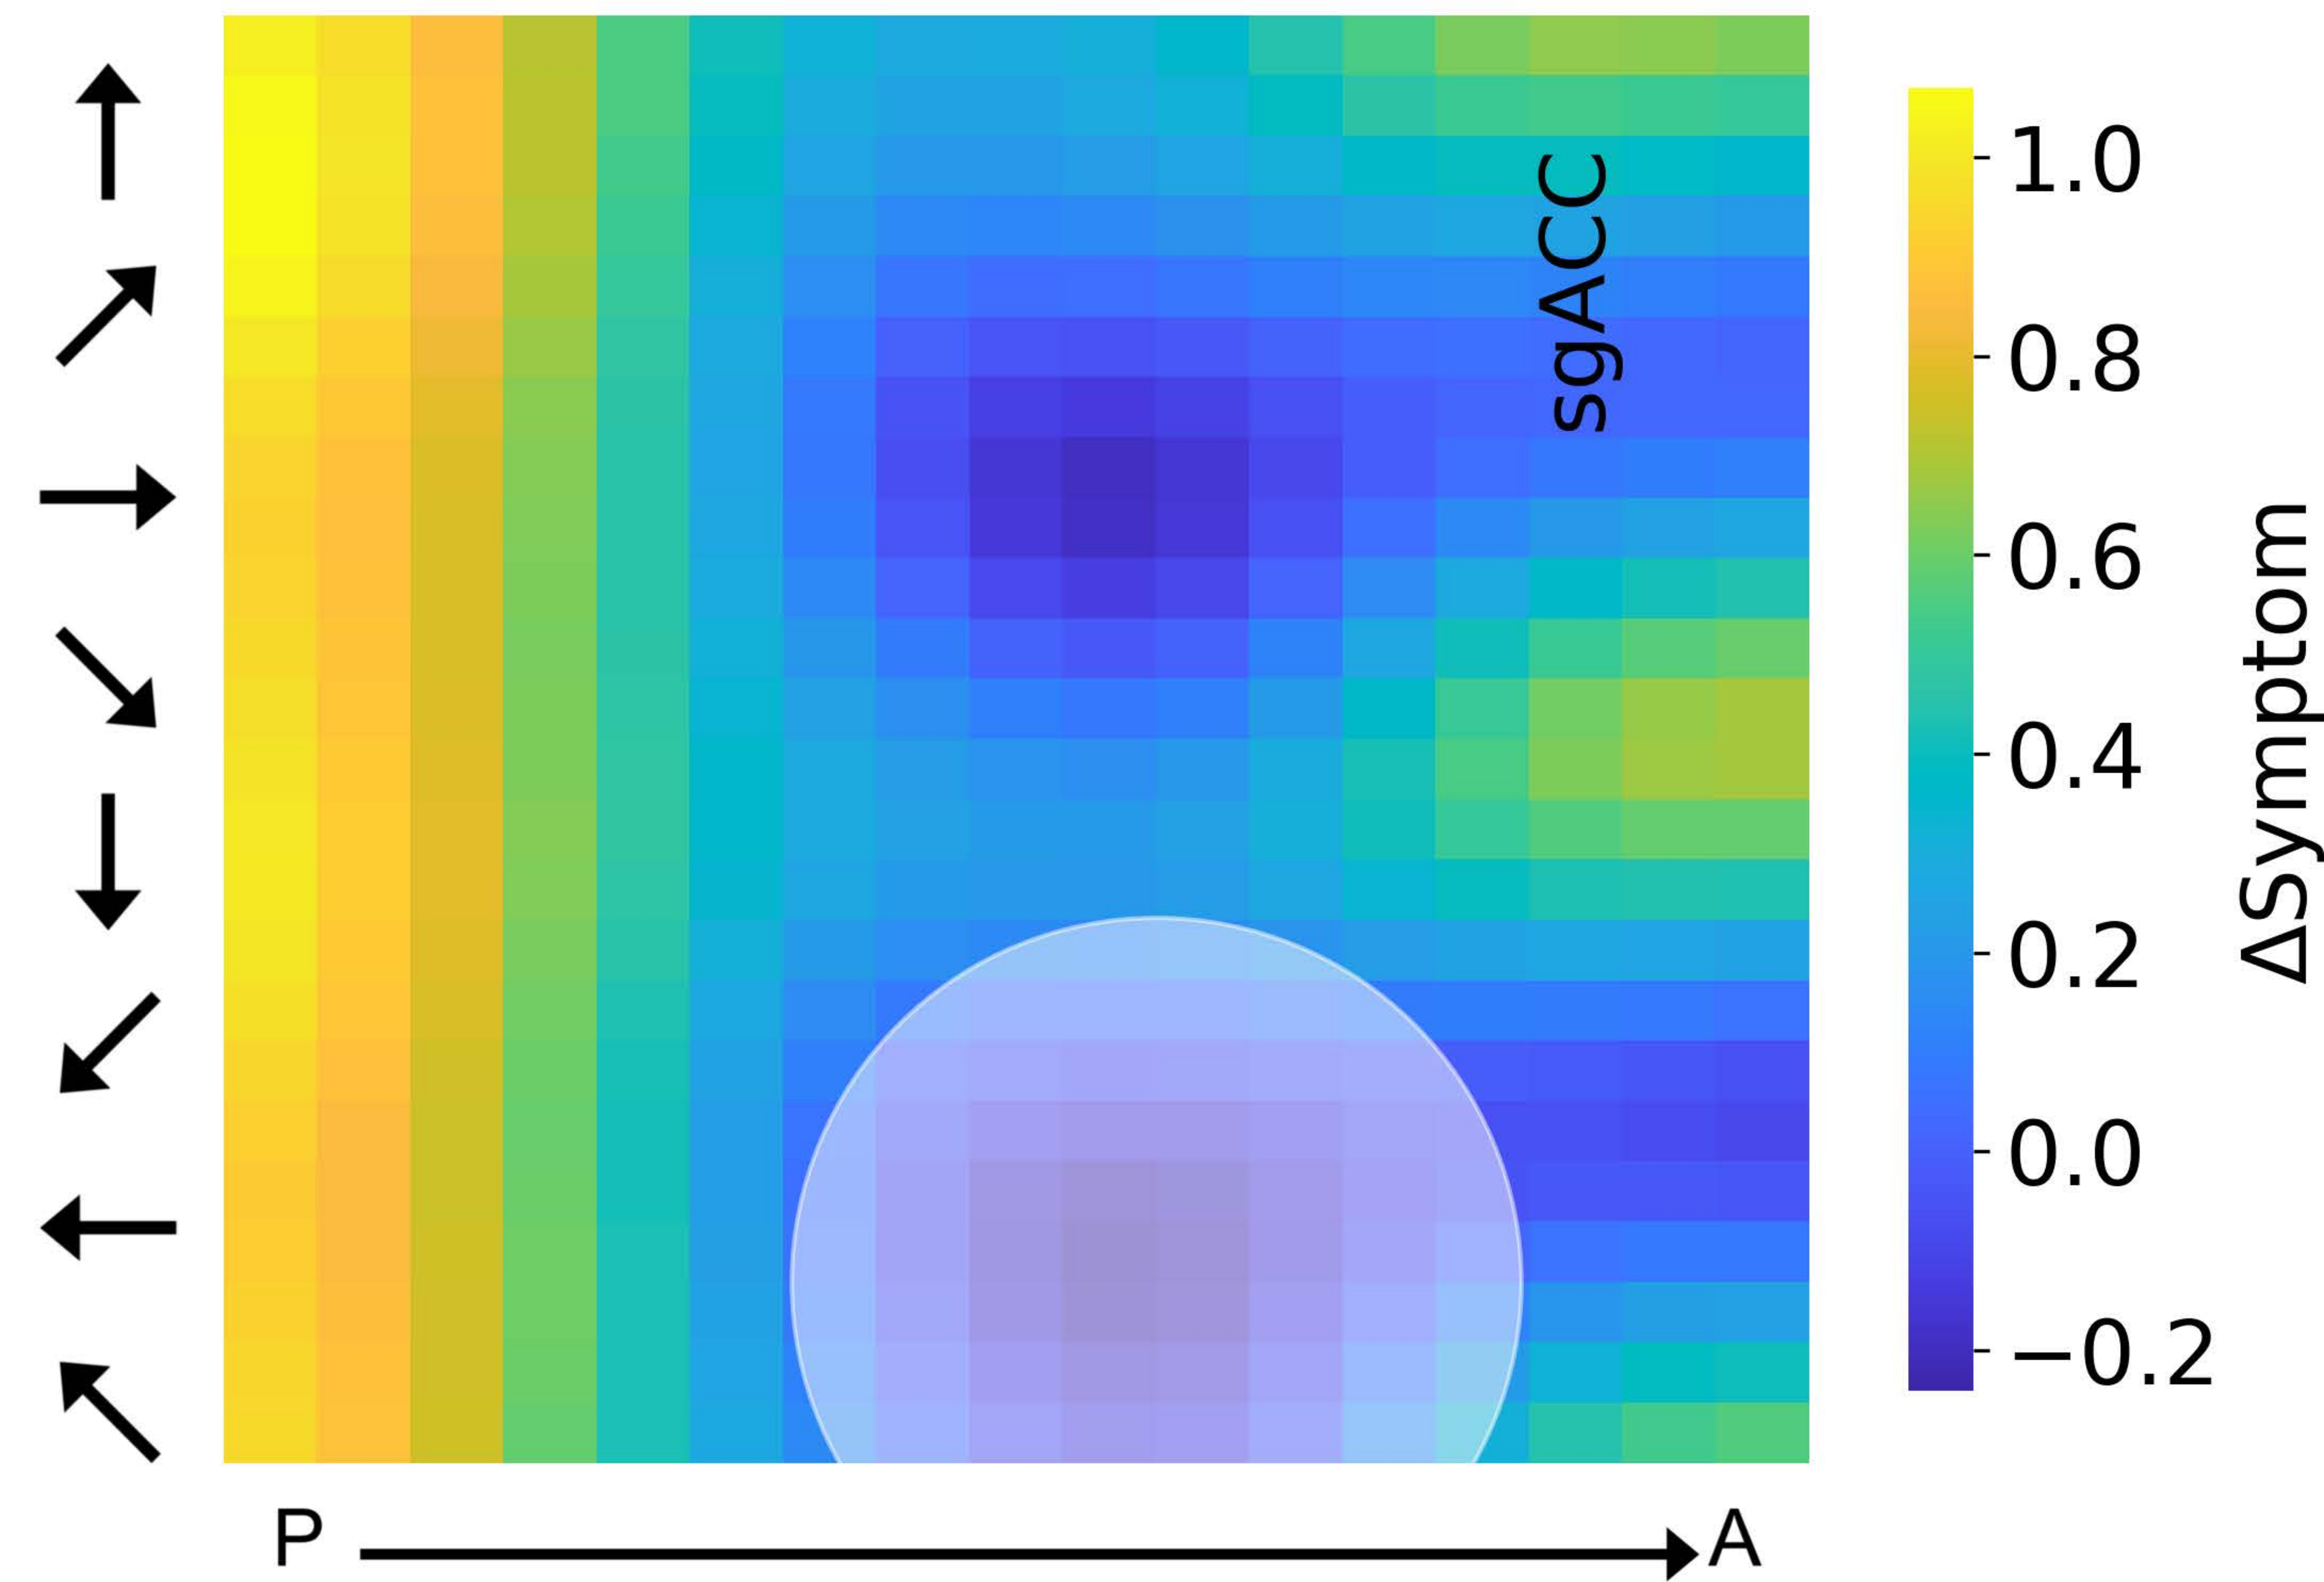



# NDARGR782ALD\_madr\_right\_dlpfc

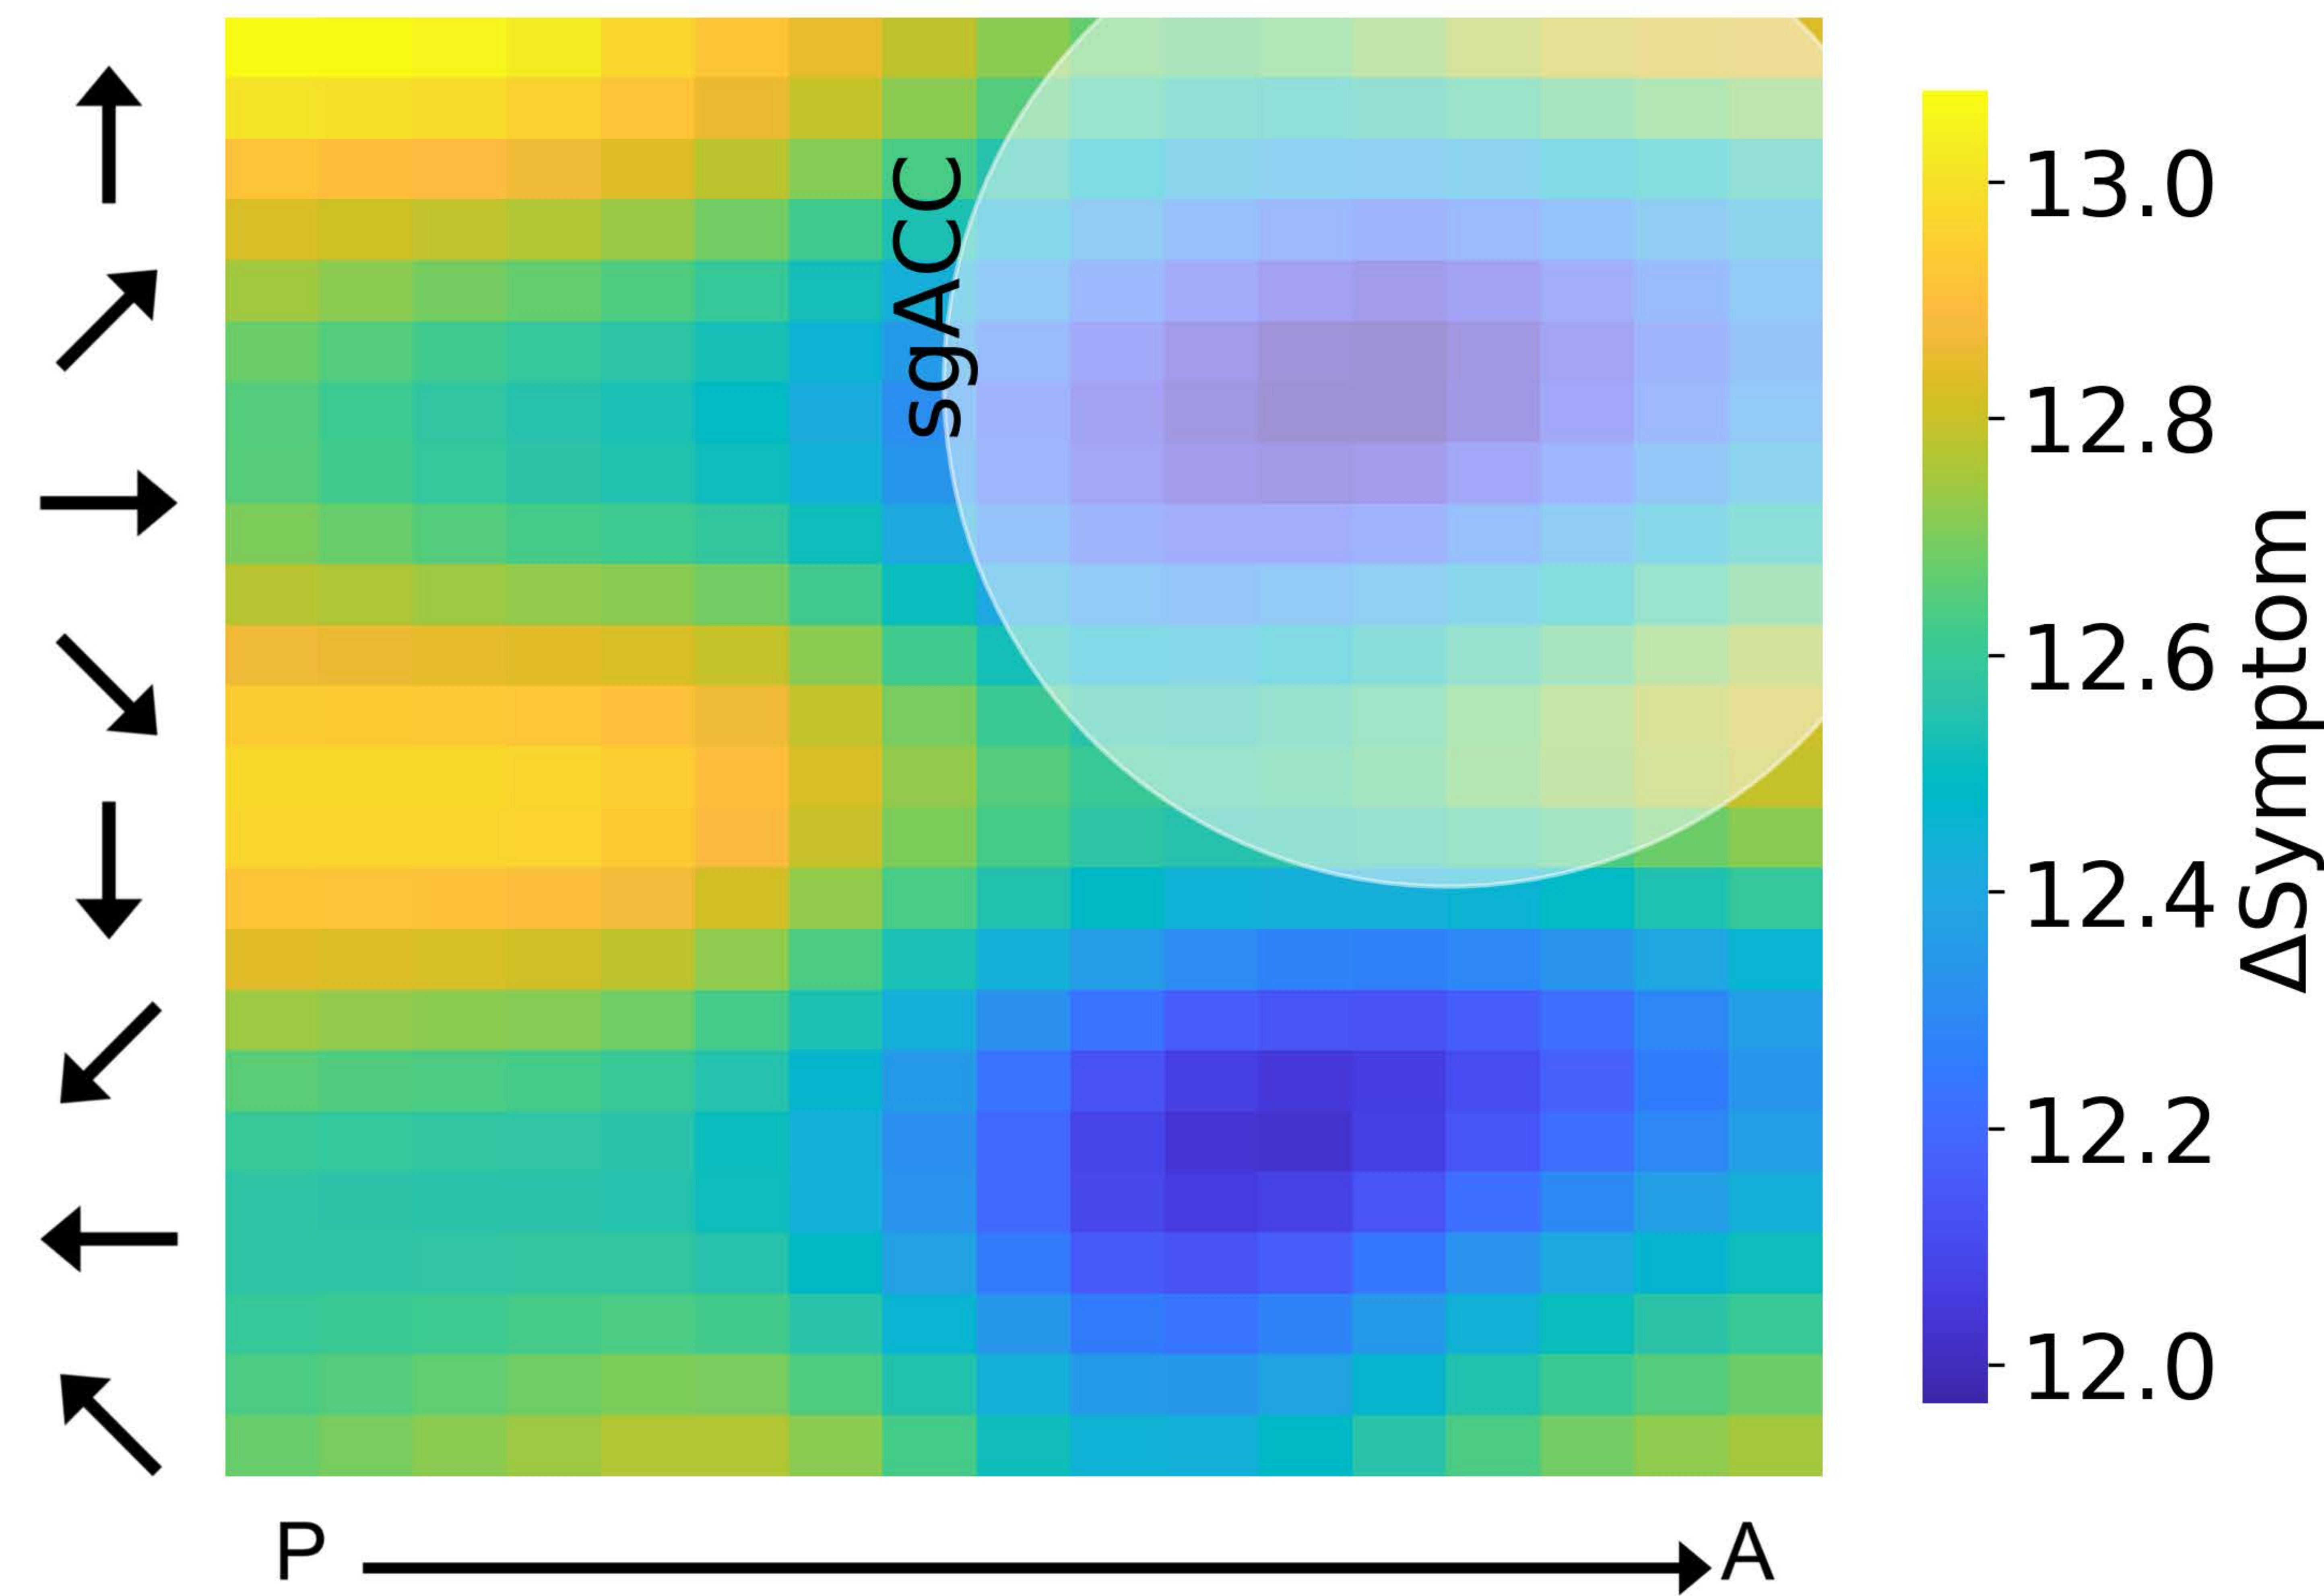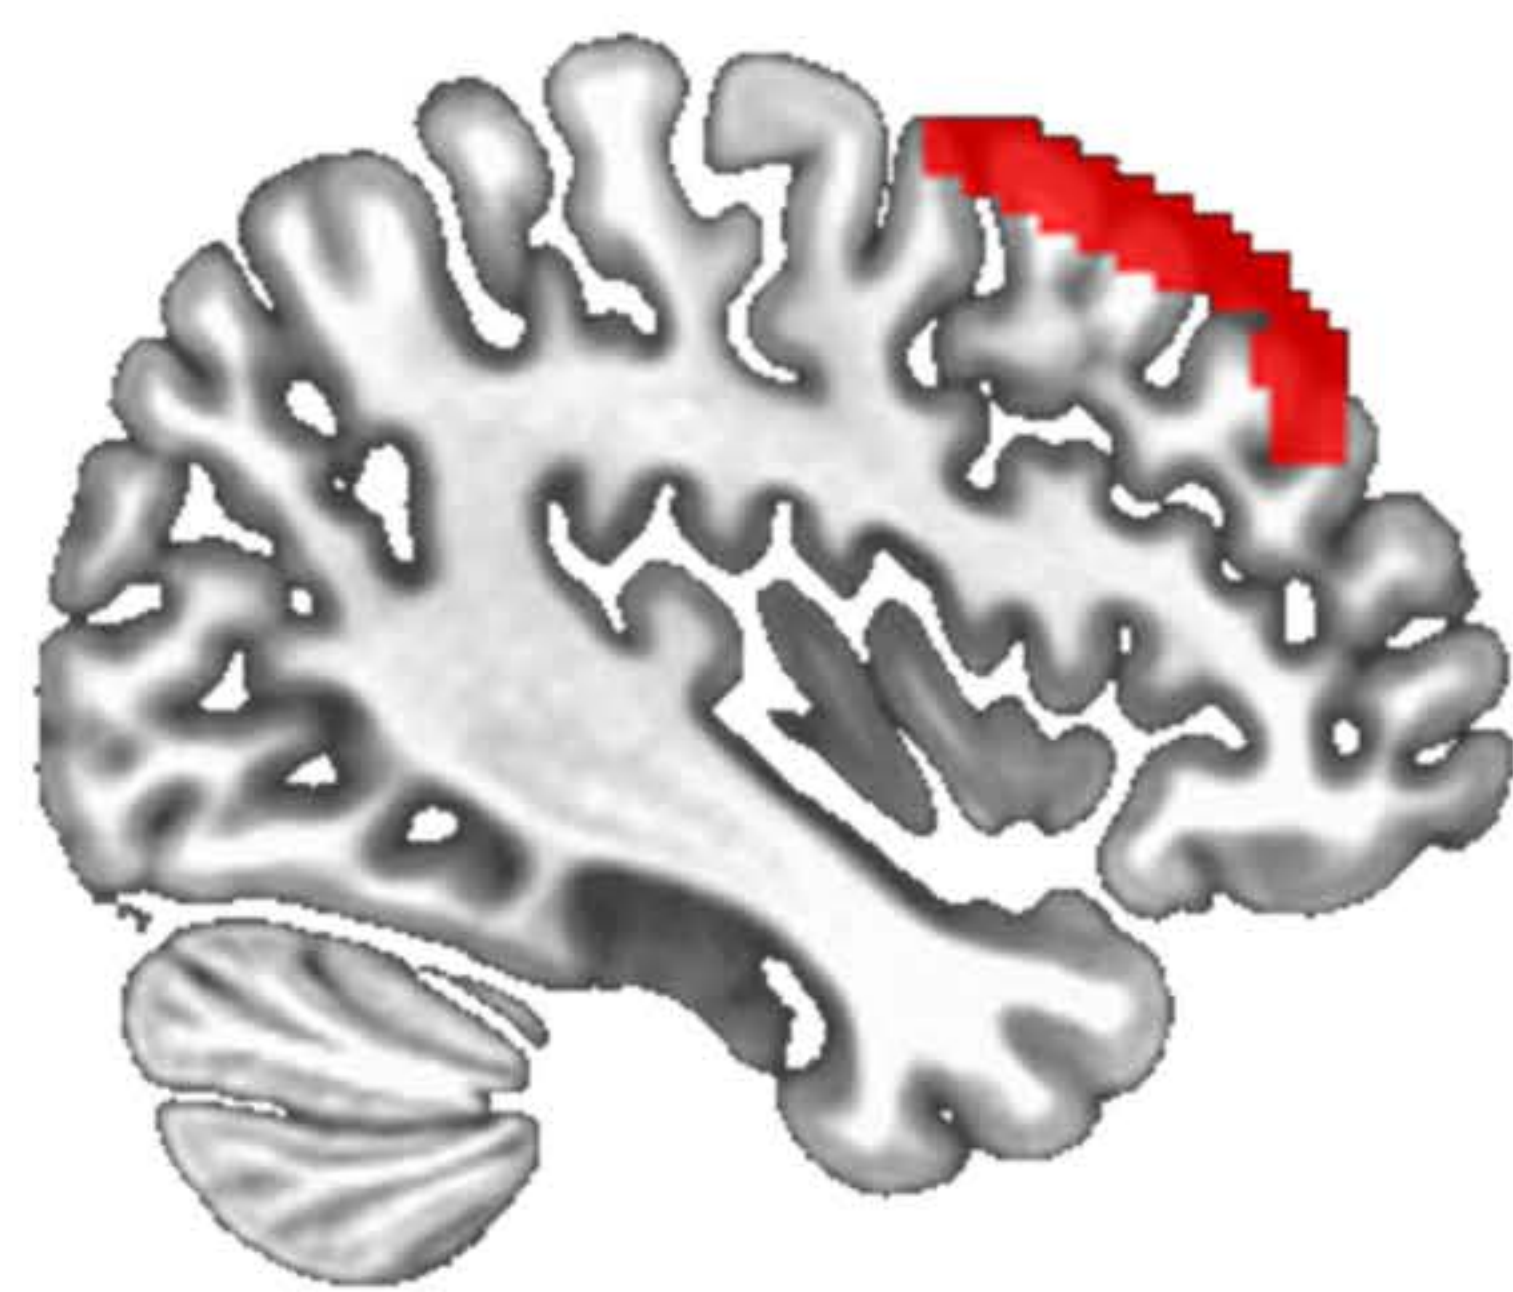



# NDARHA109LH7\_madr\_right\_dlpfc

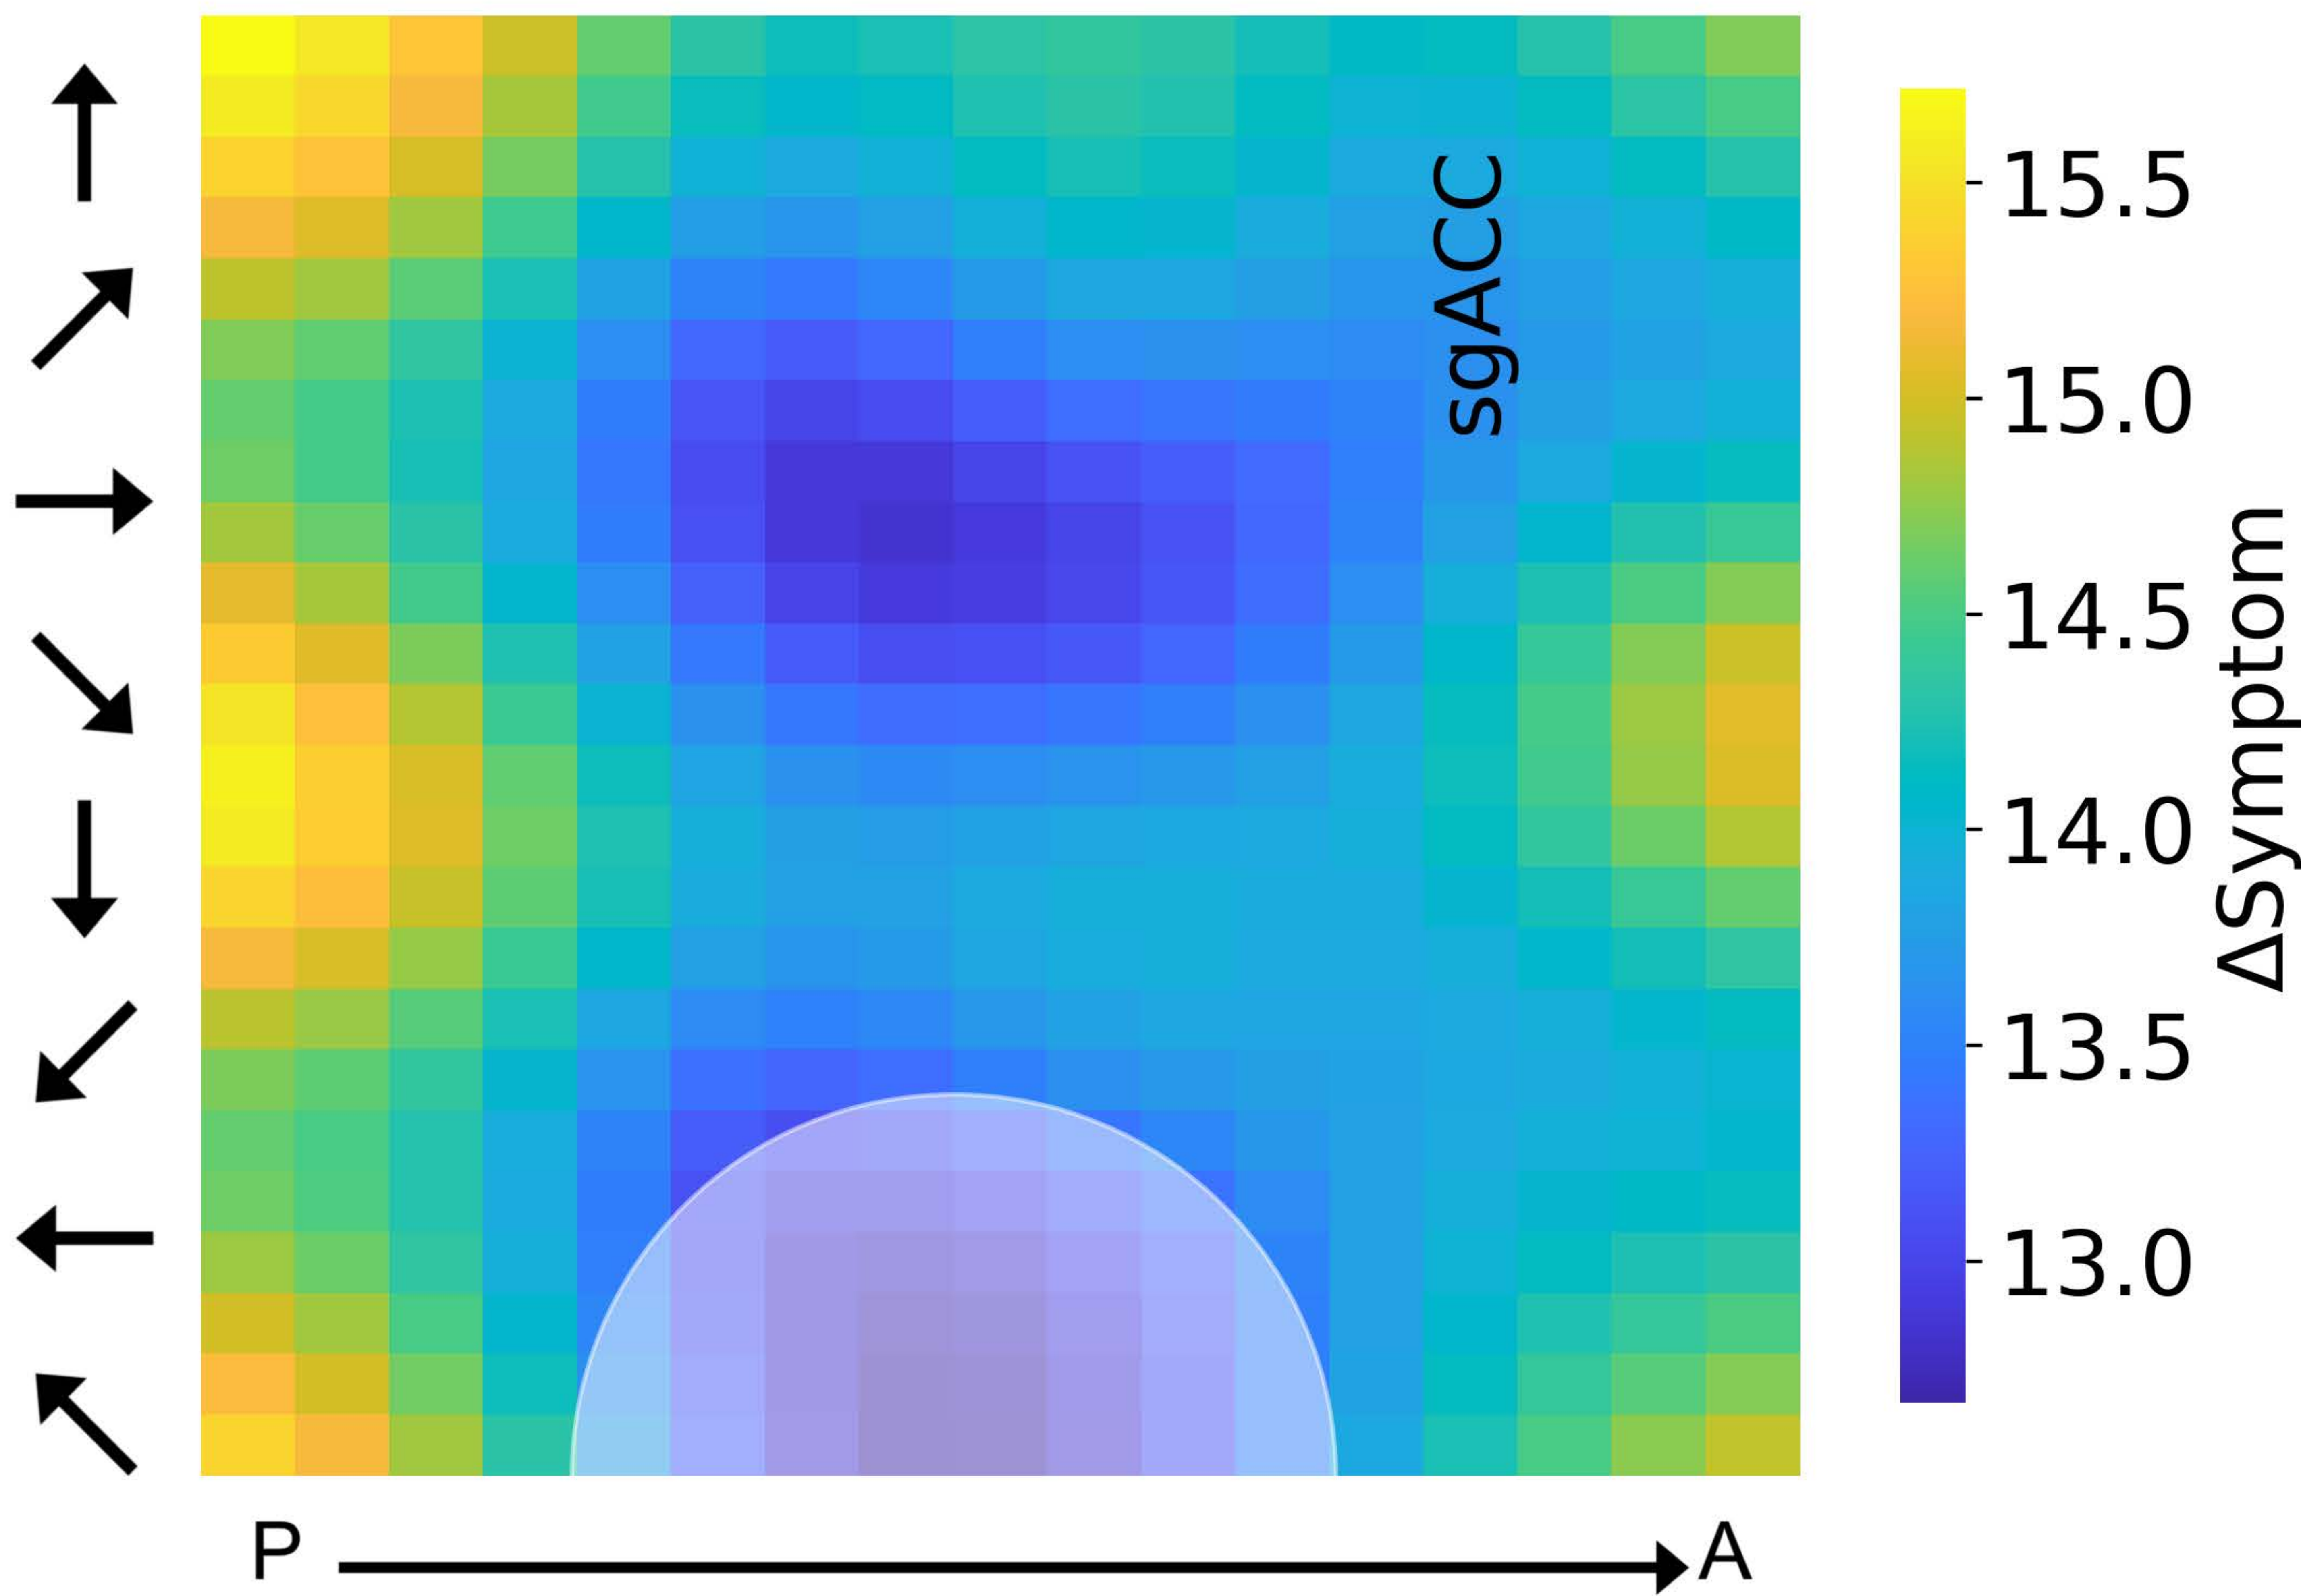



# NDARHR981AP1\_madrs\_right\_dlpfc

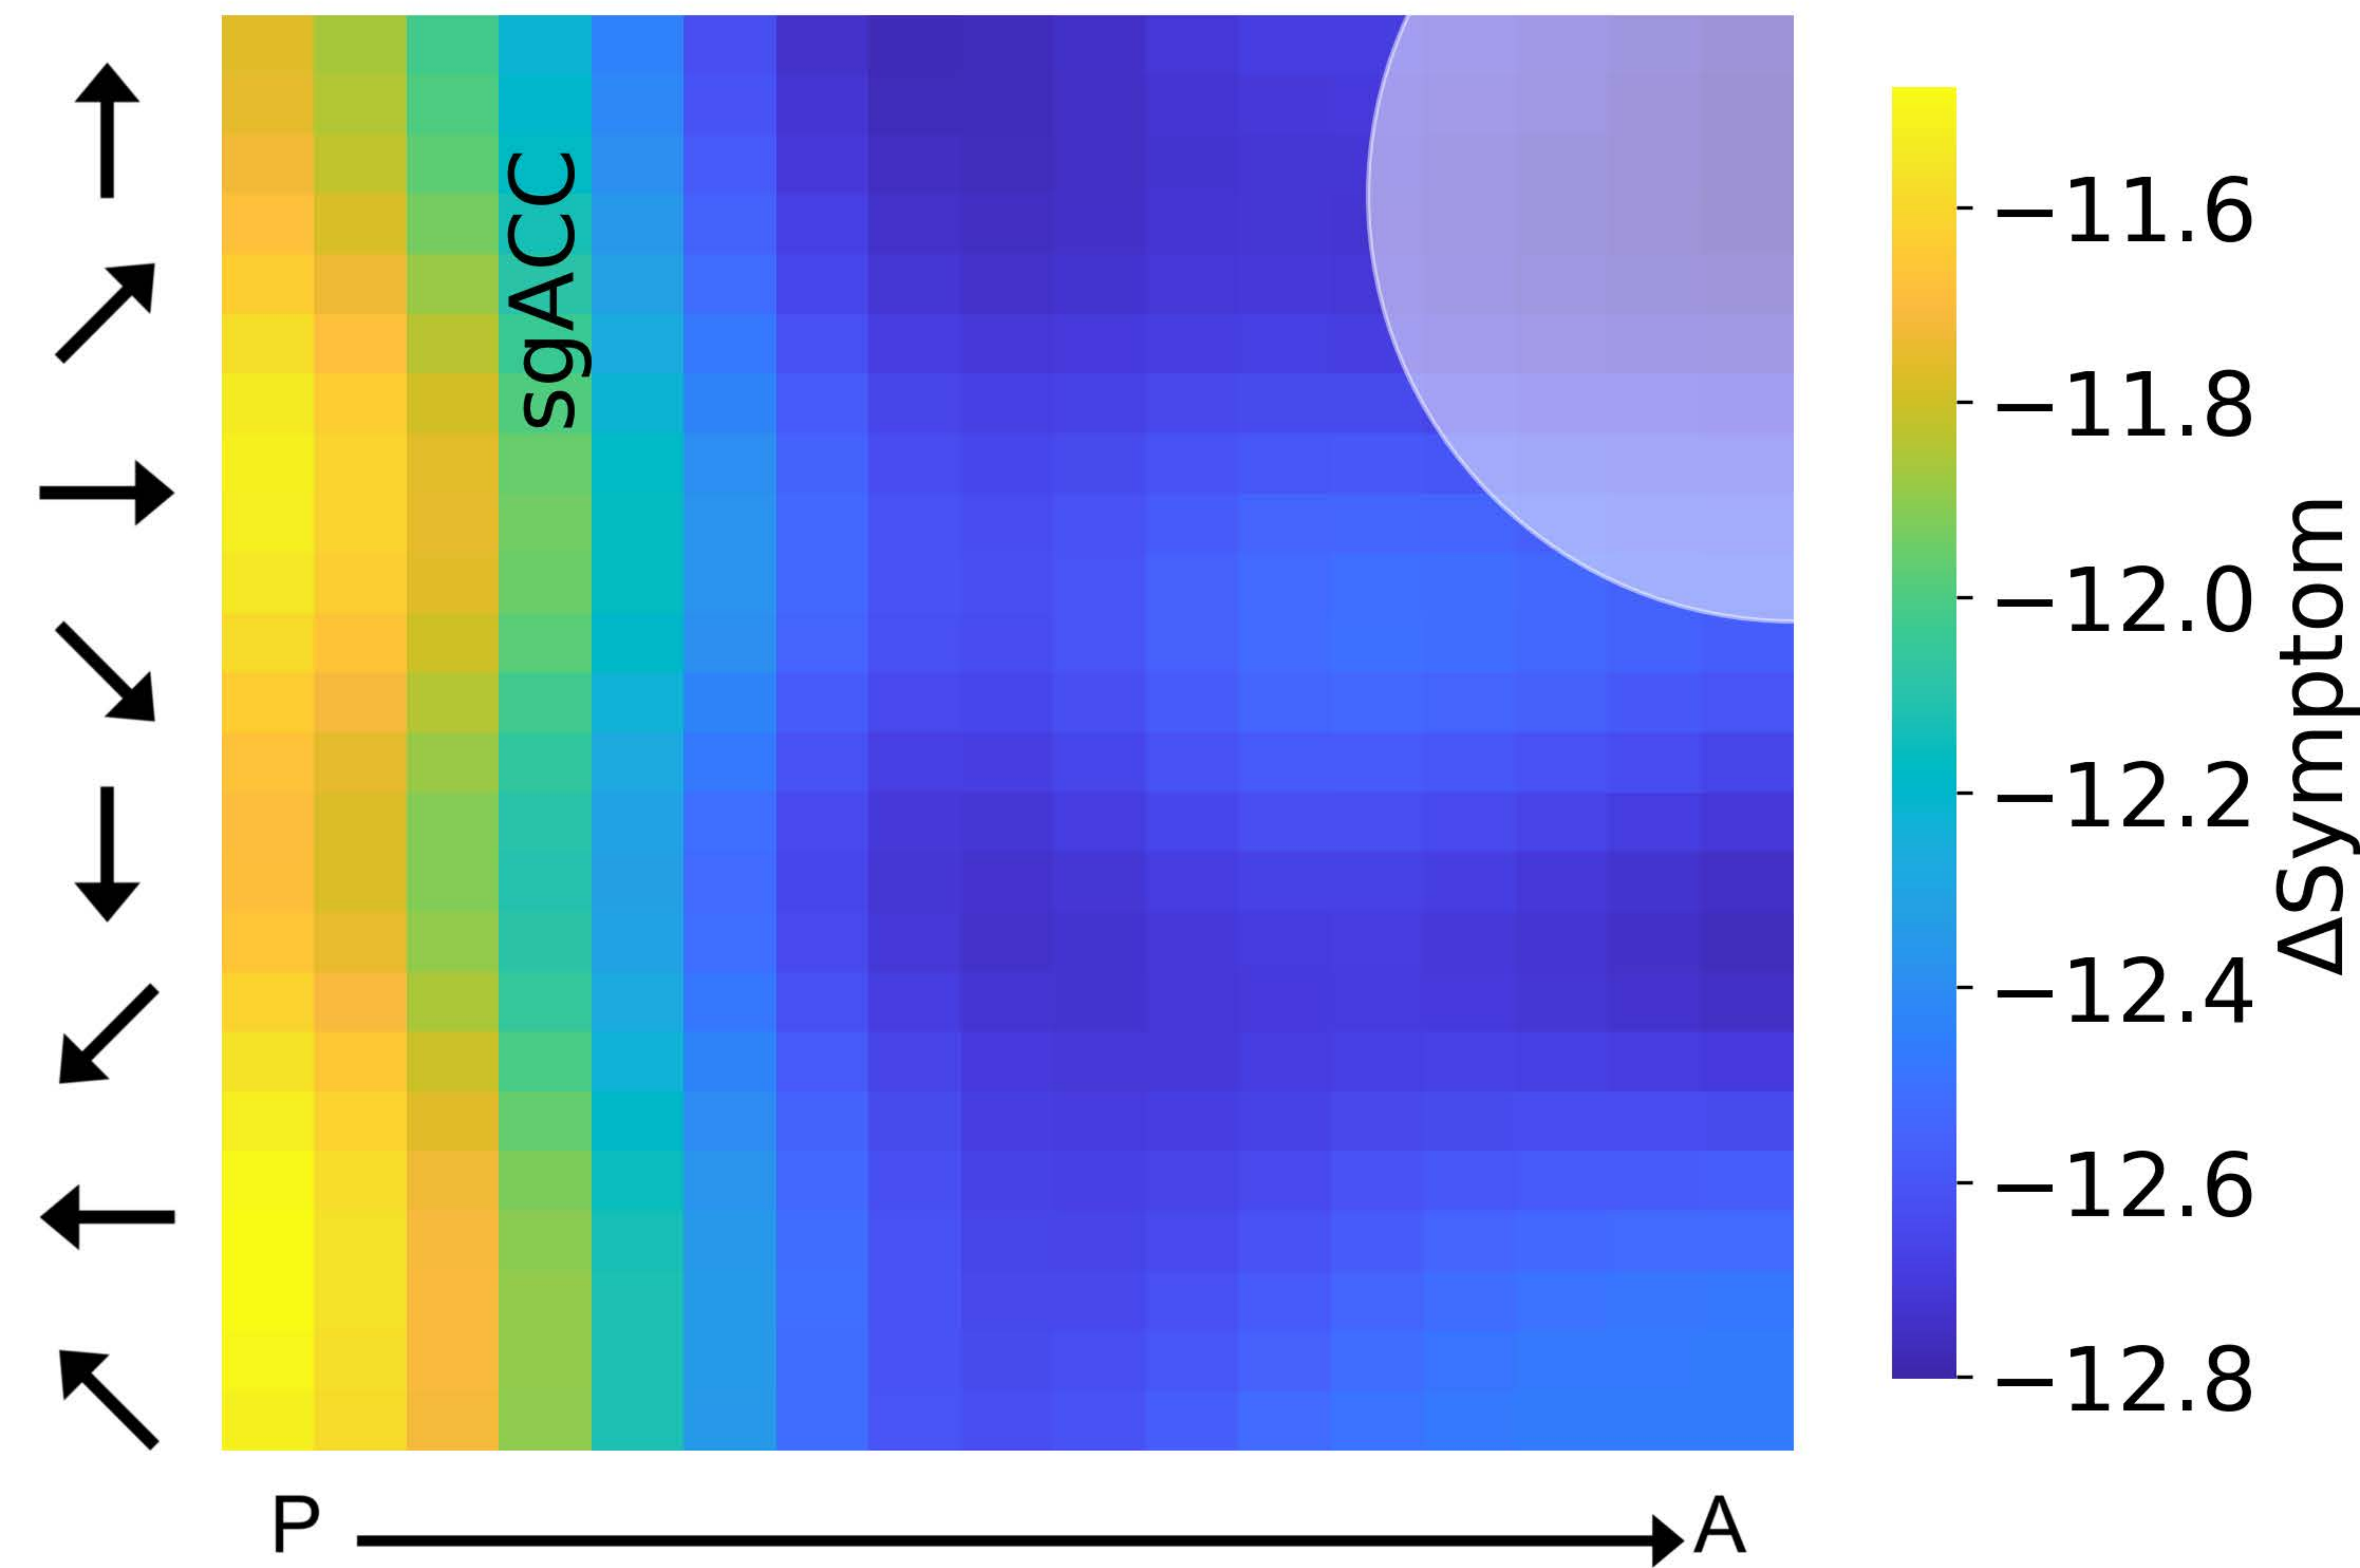



# NDARHX487CT9\_madrs\_right\_dlpfc

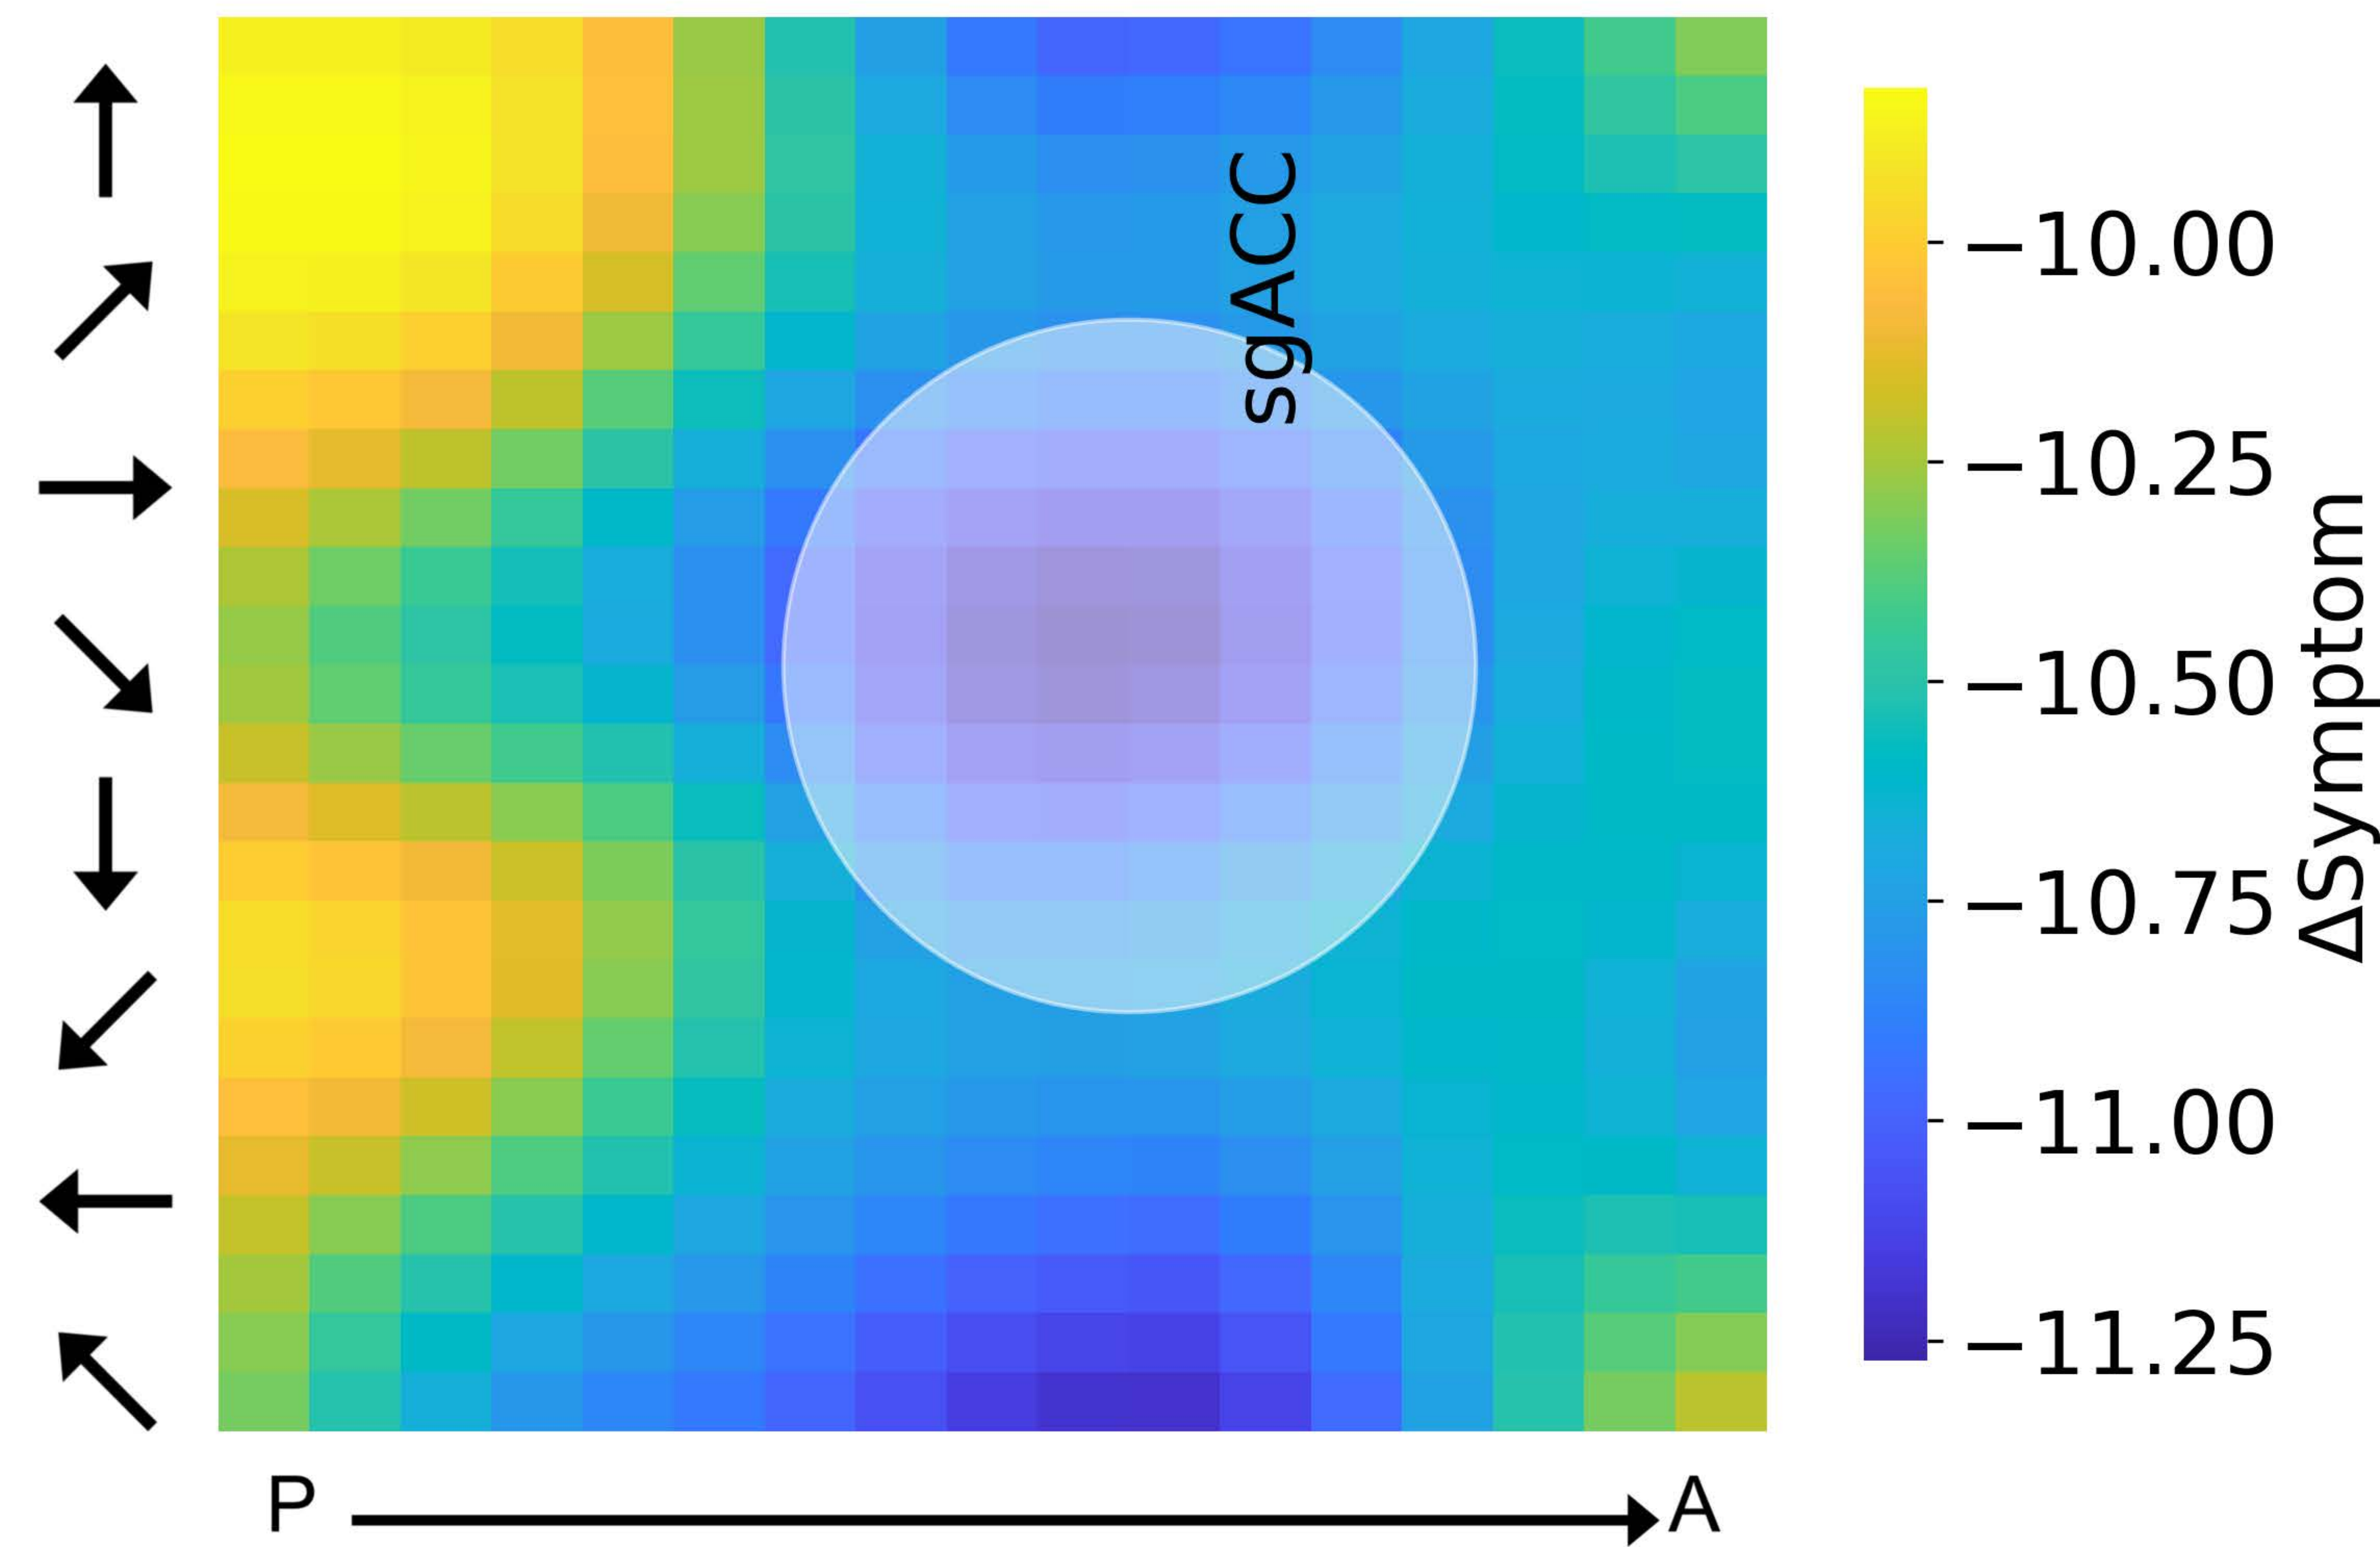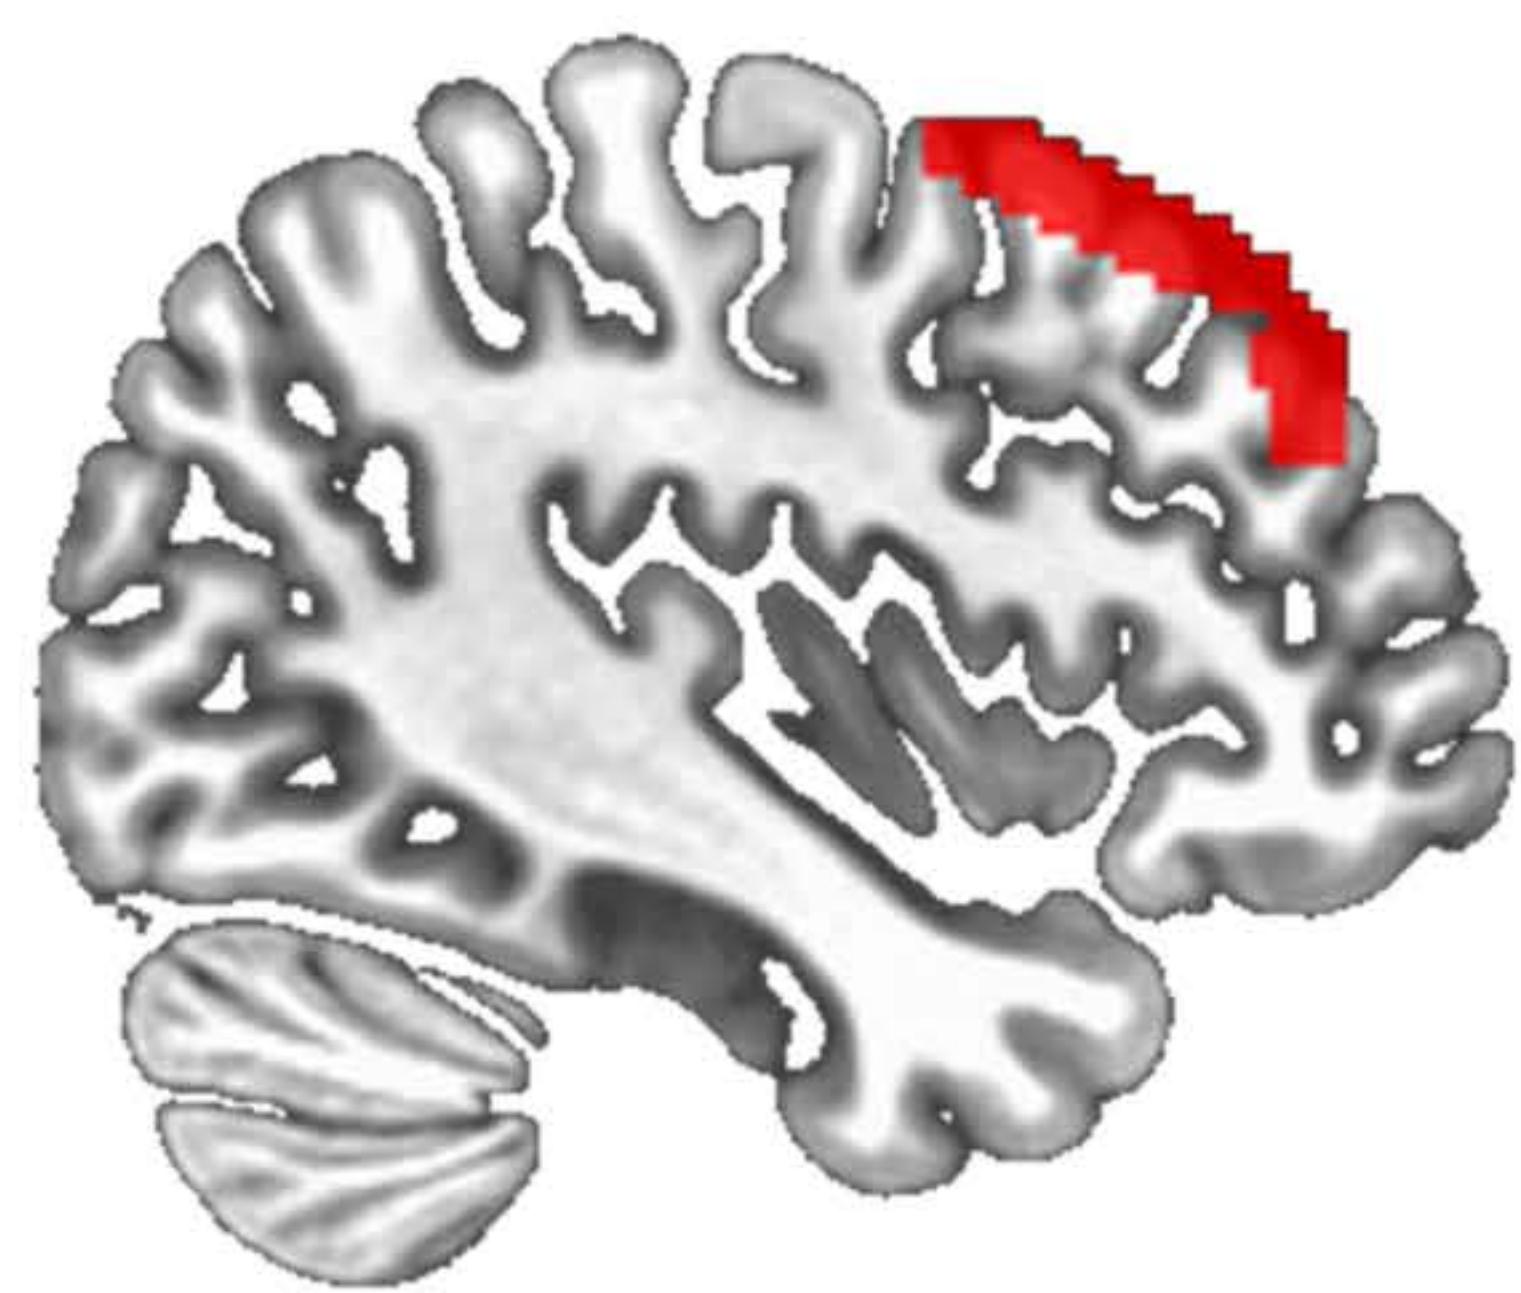



# NDARHX662HCK\_madrs\_right\_dlpfc

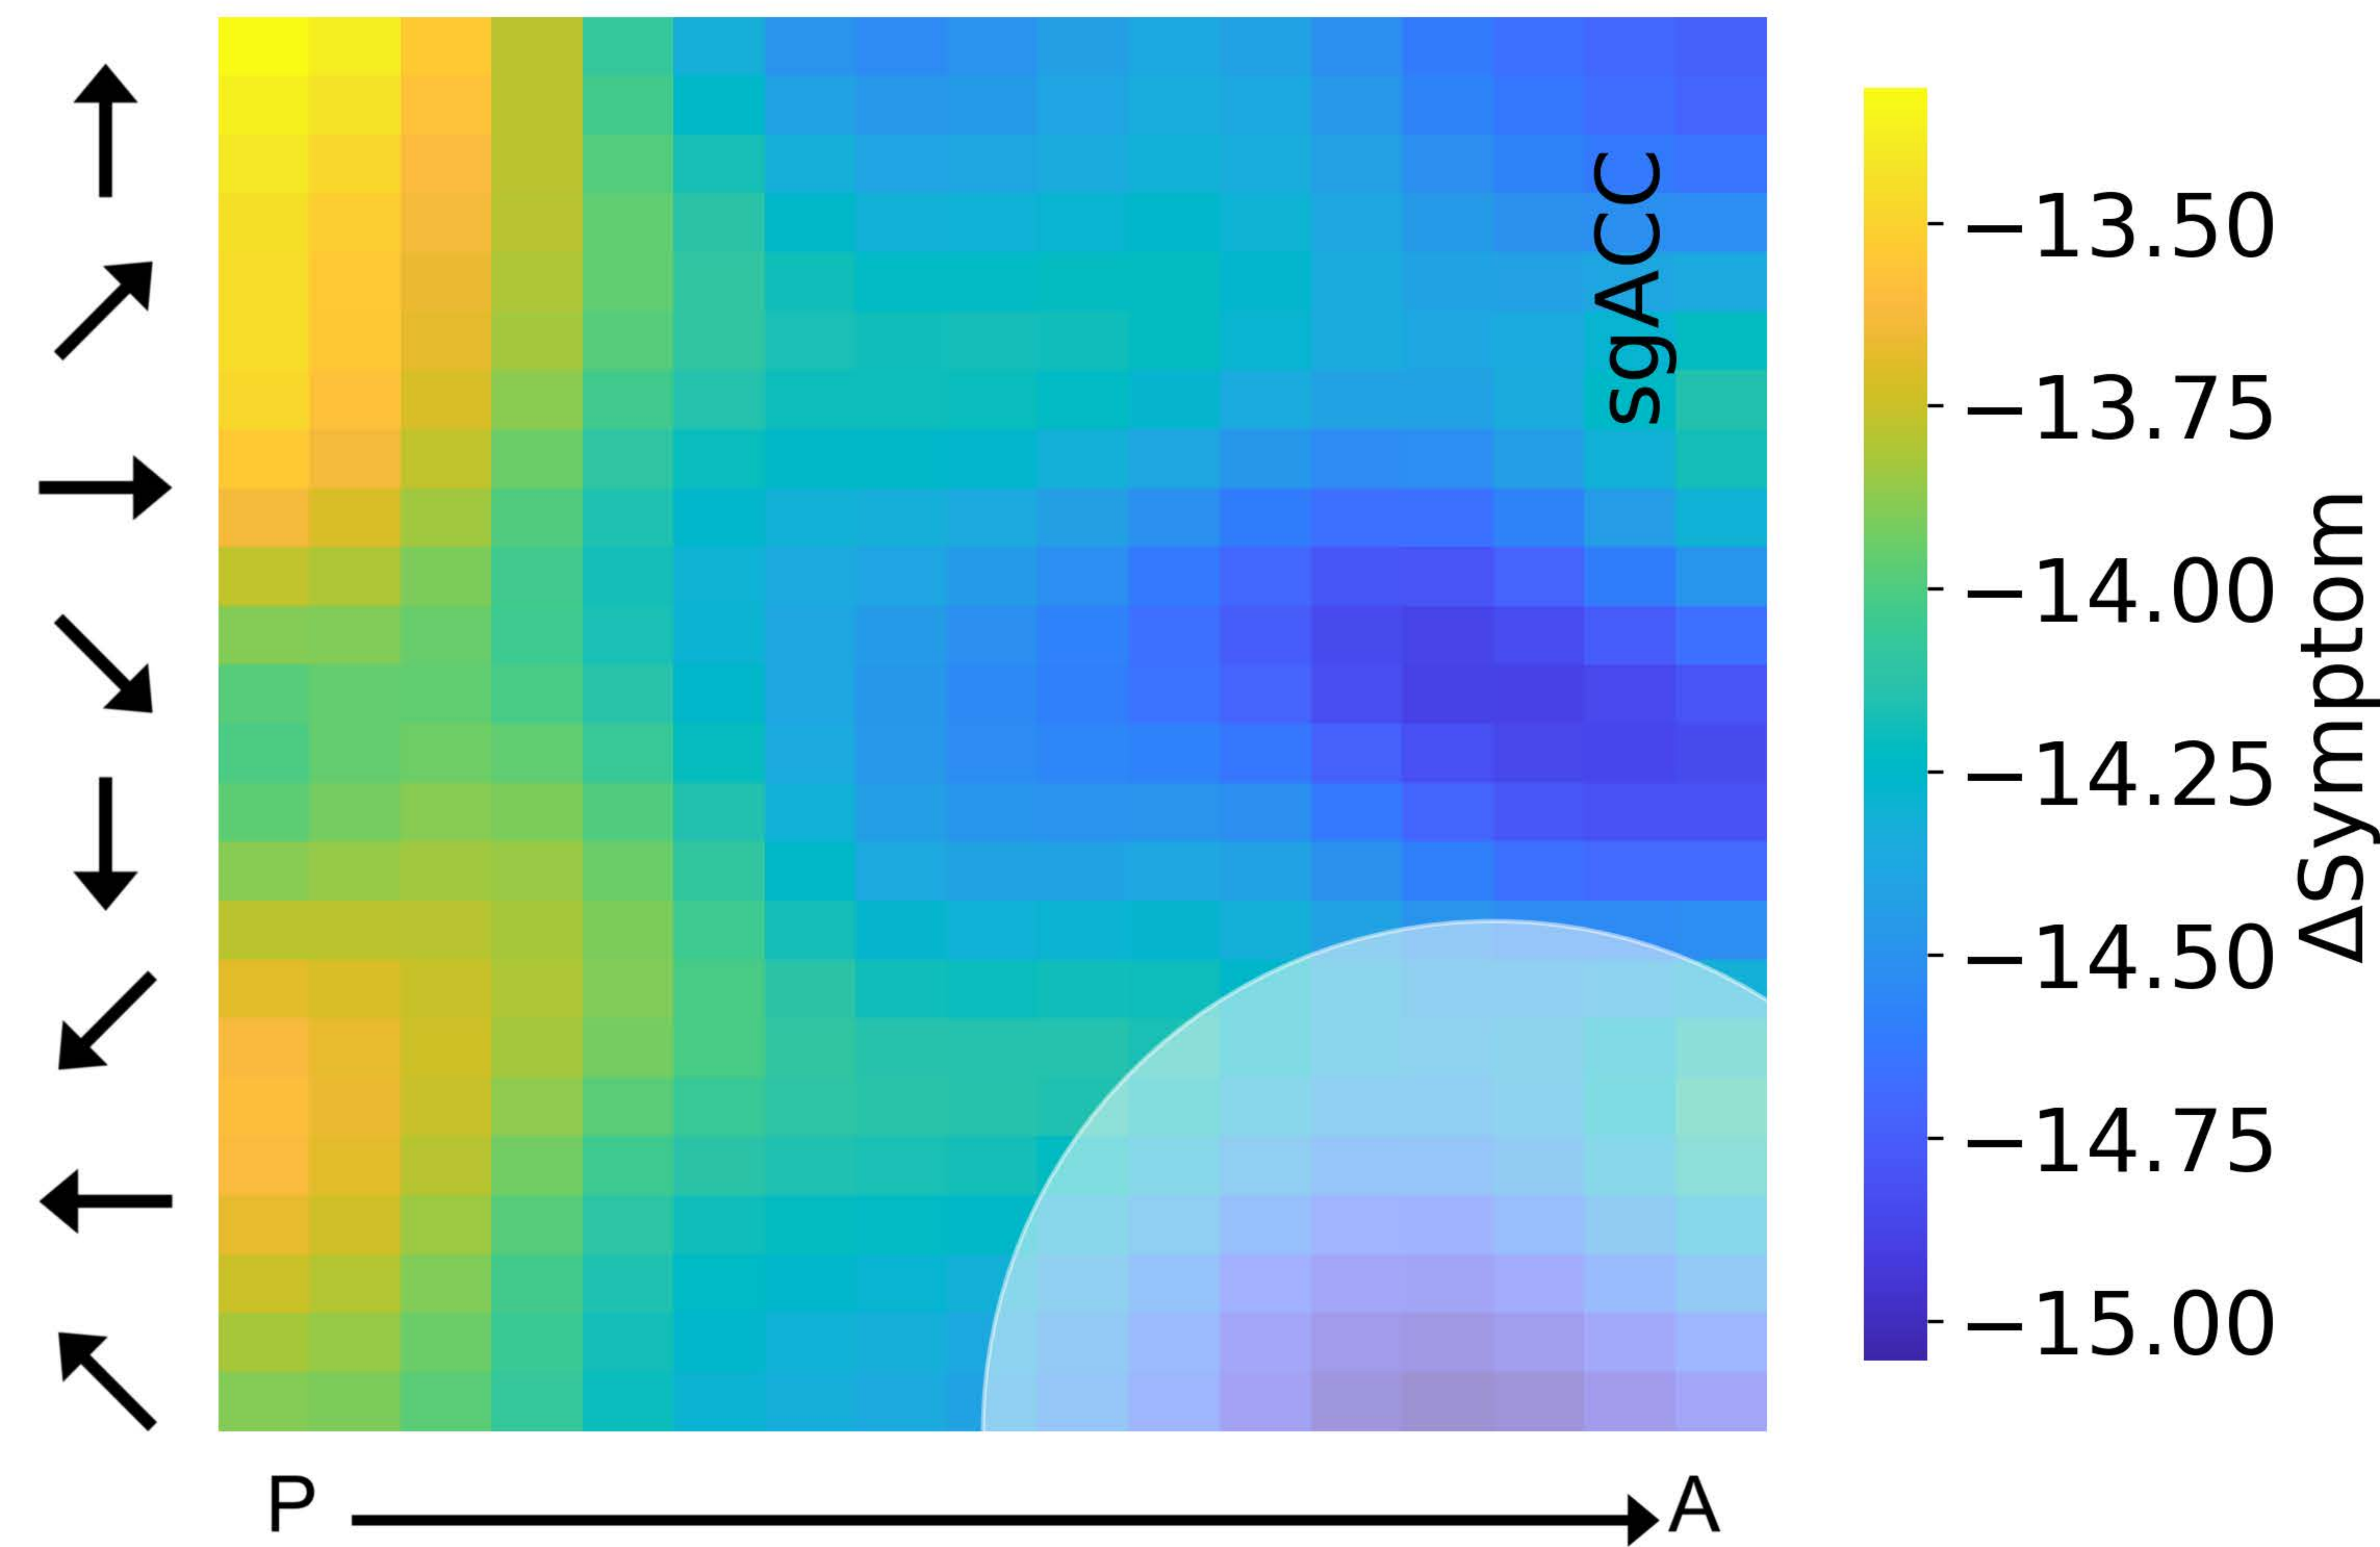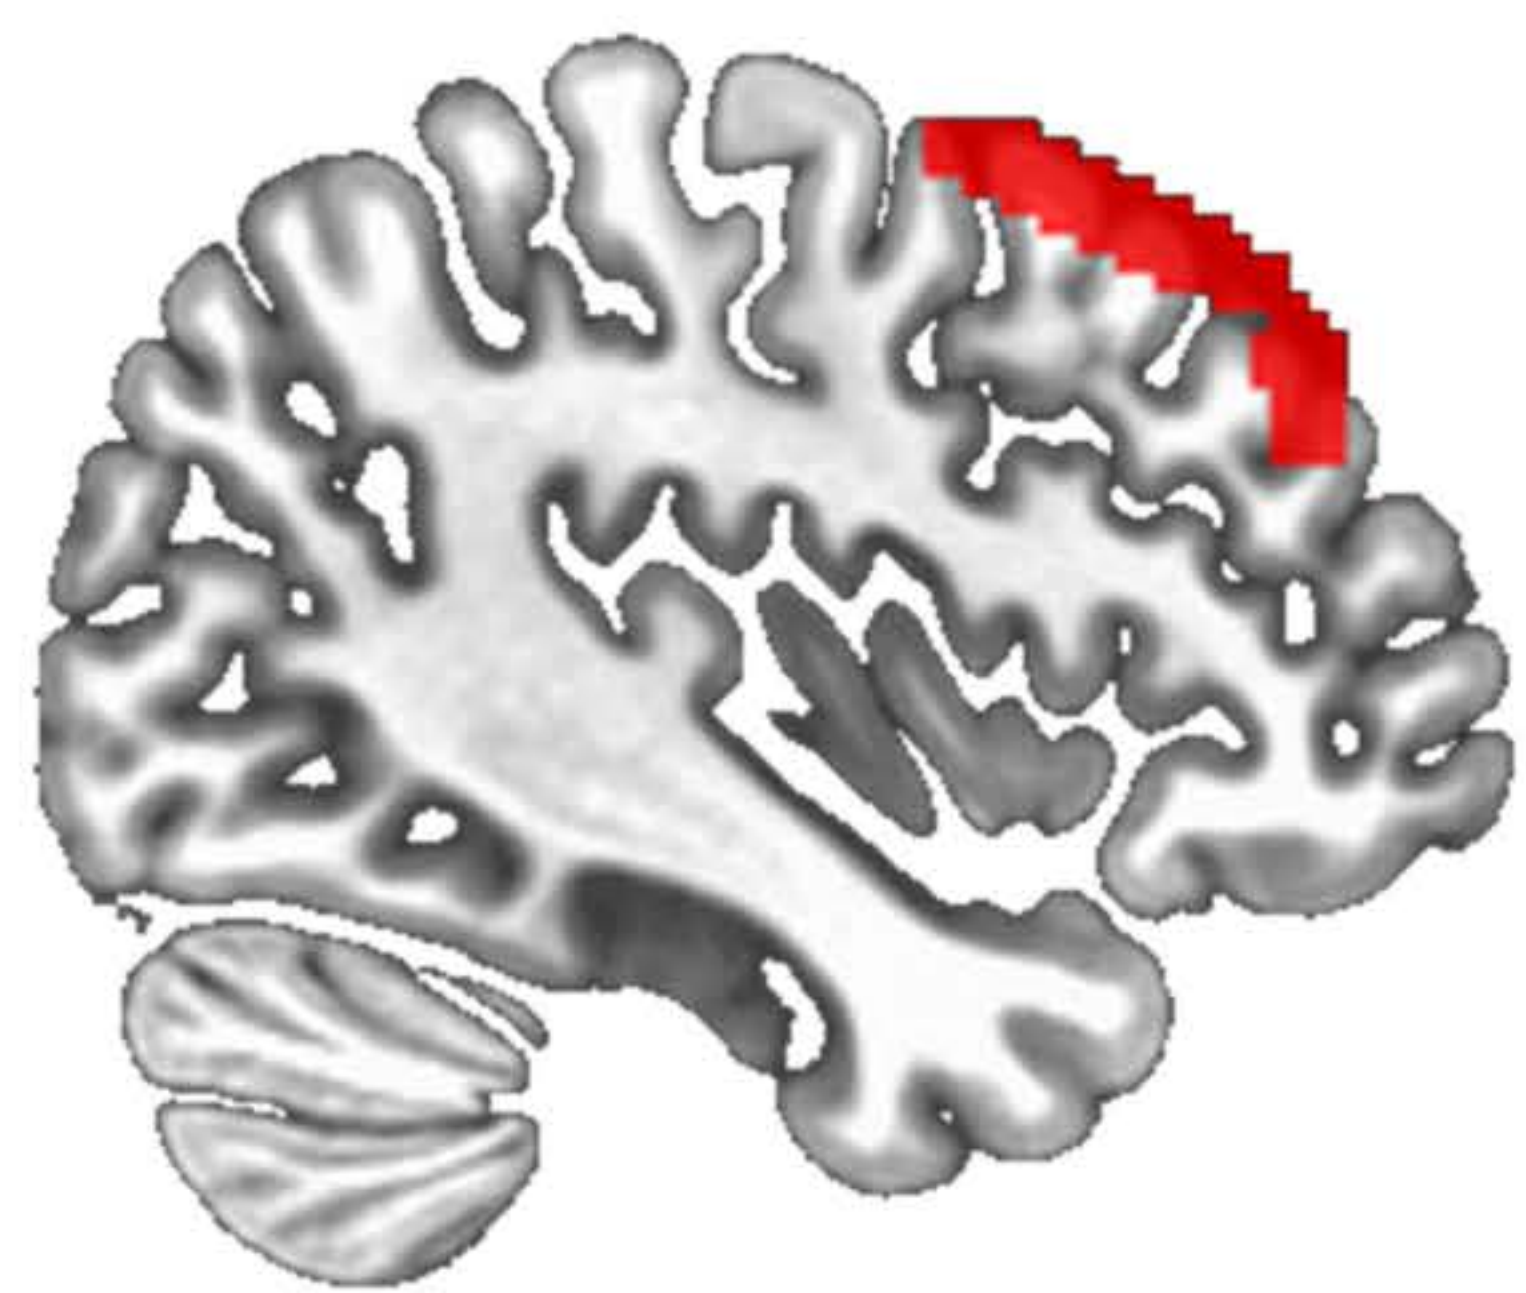



# INDARHZ301NUW\_madrs\_right\_dlpfc

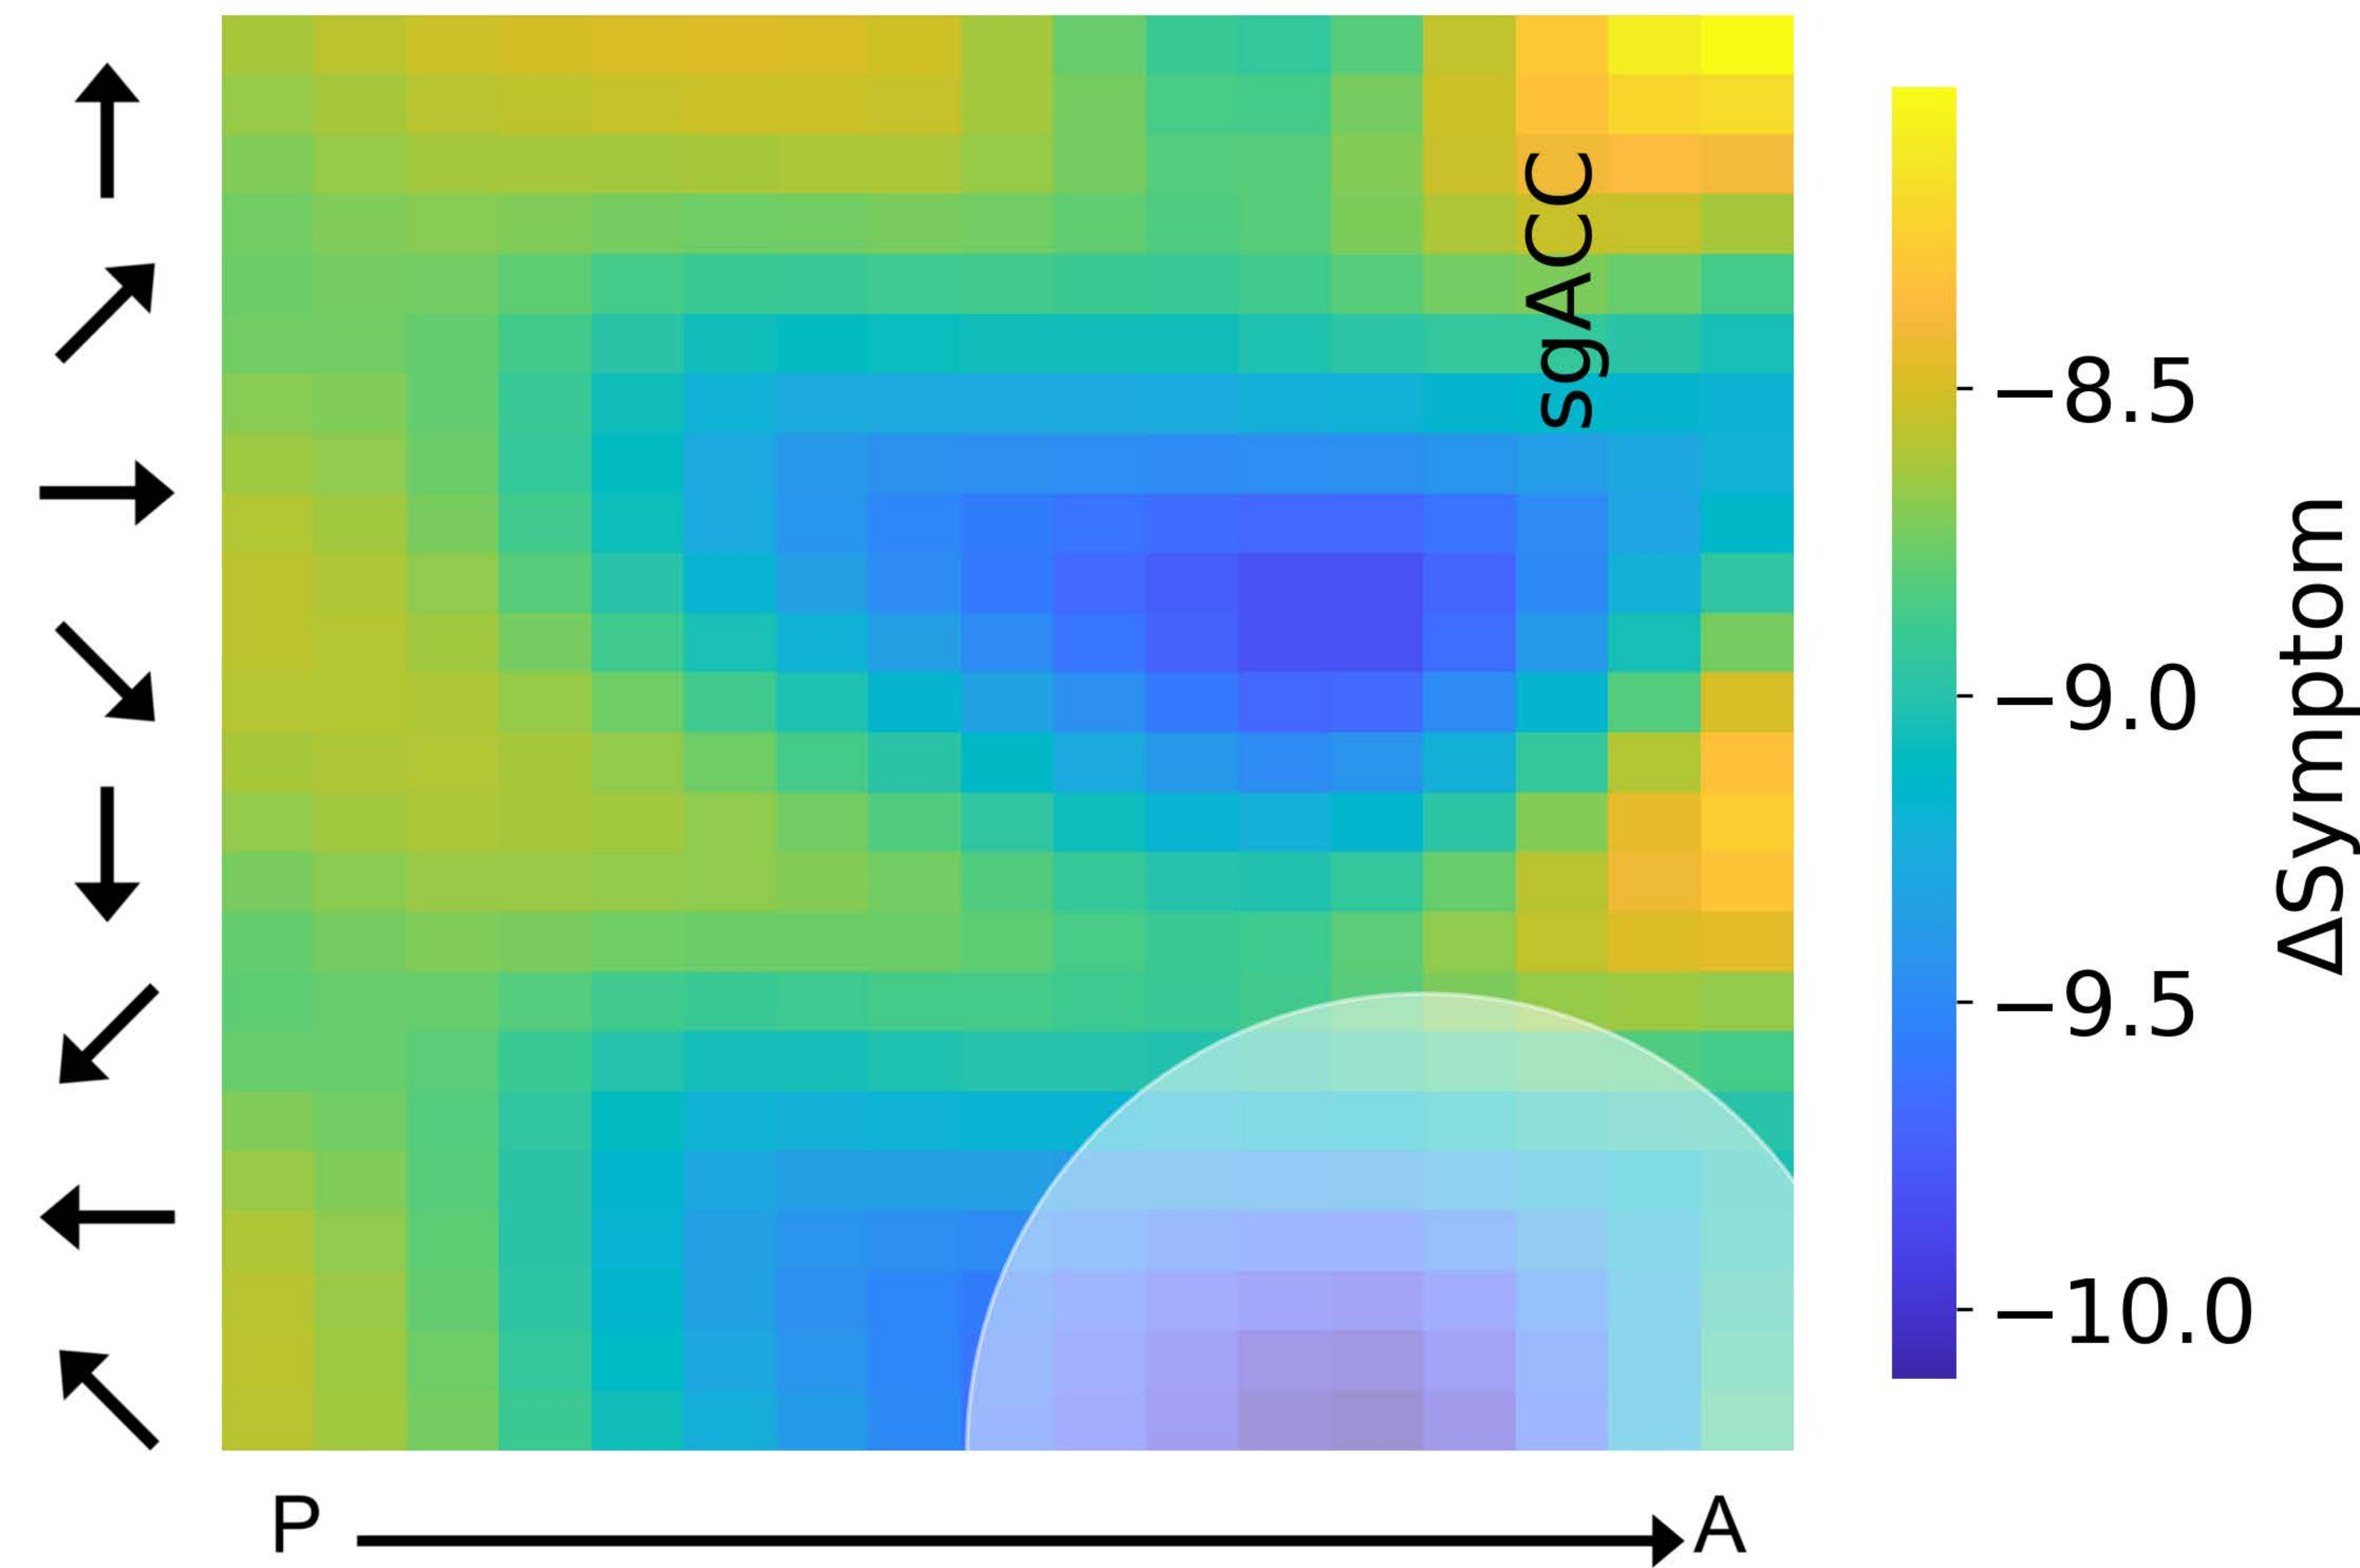



# NDARHZ662EPK\_madrs\_right\_dlpfc

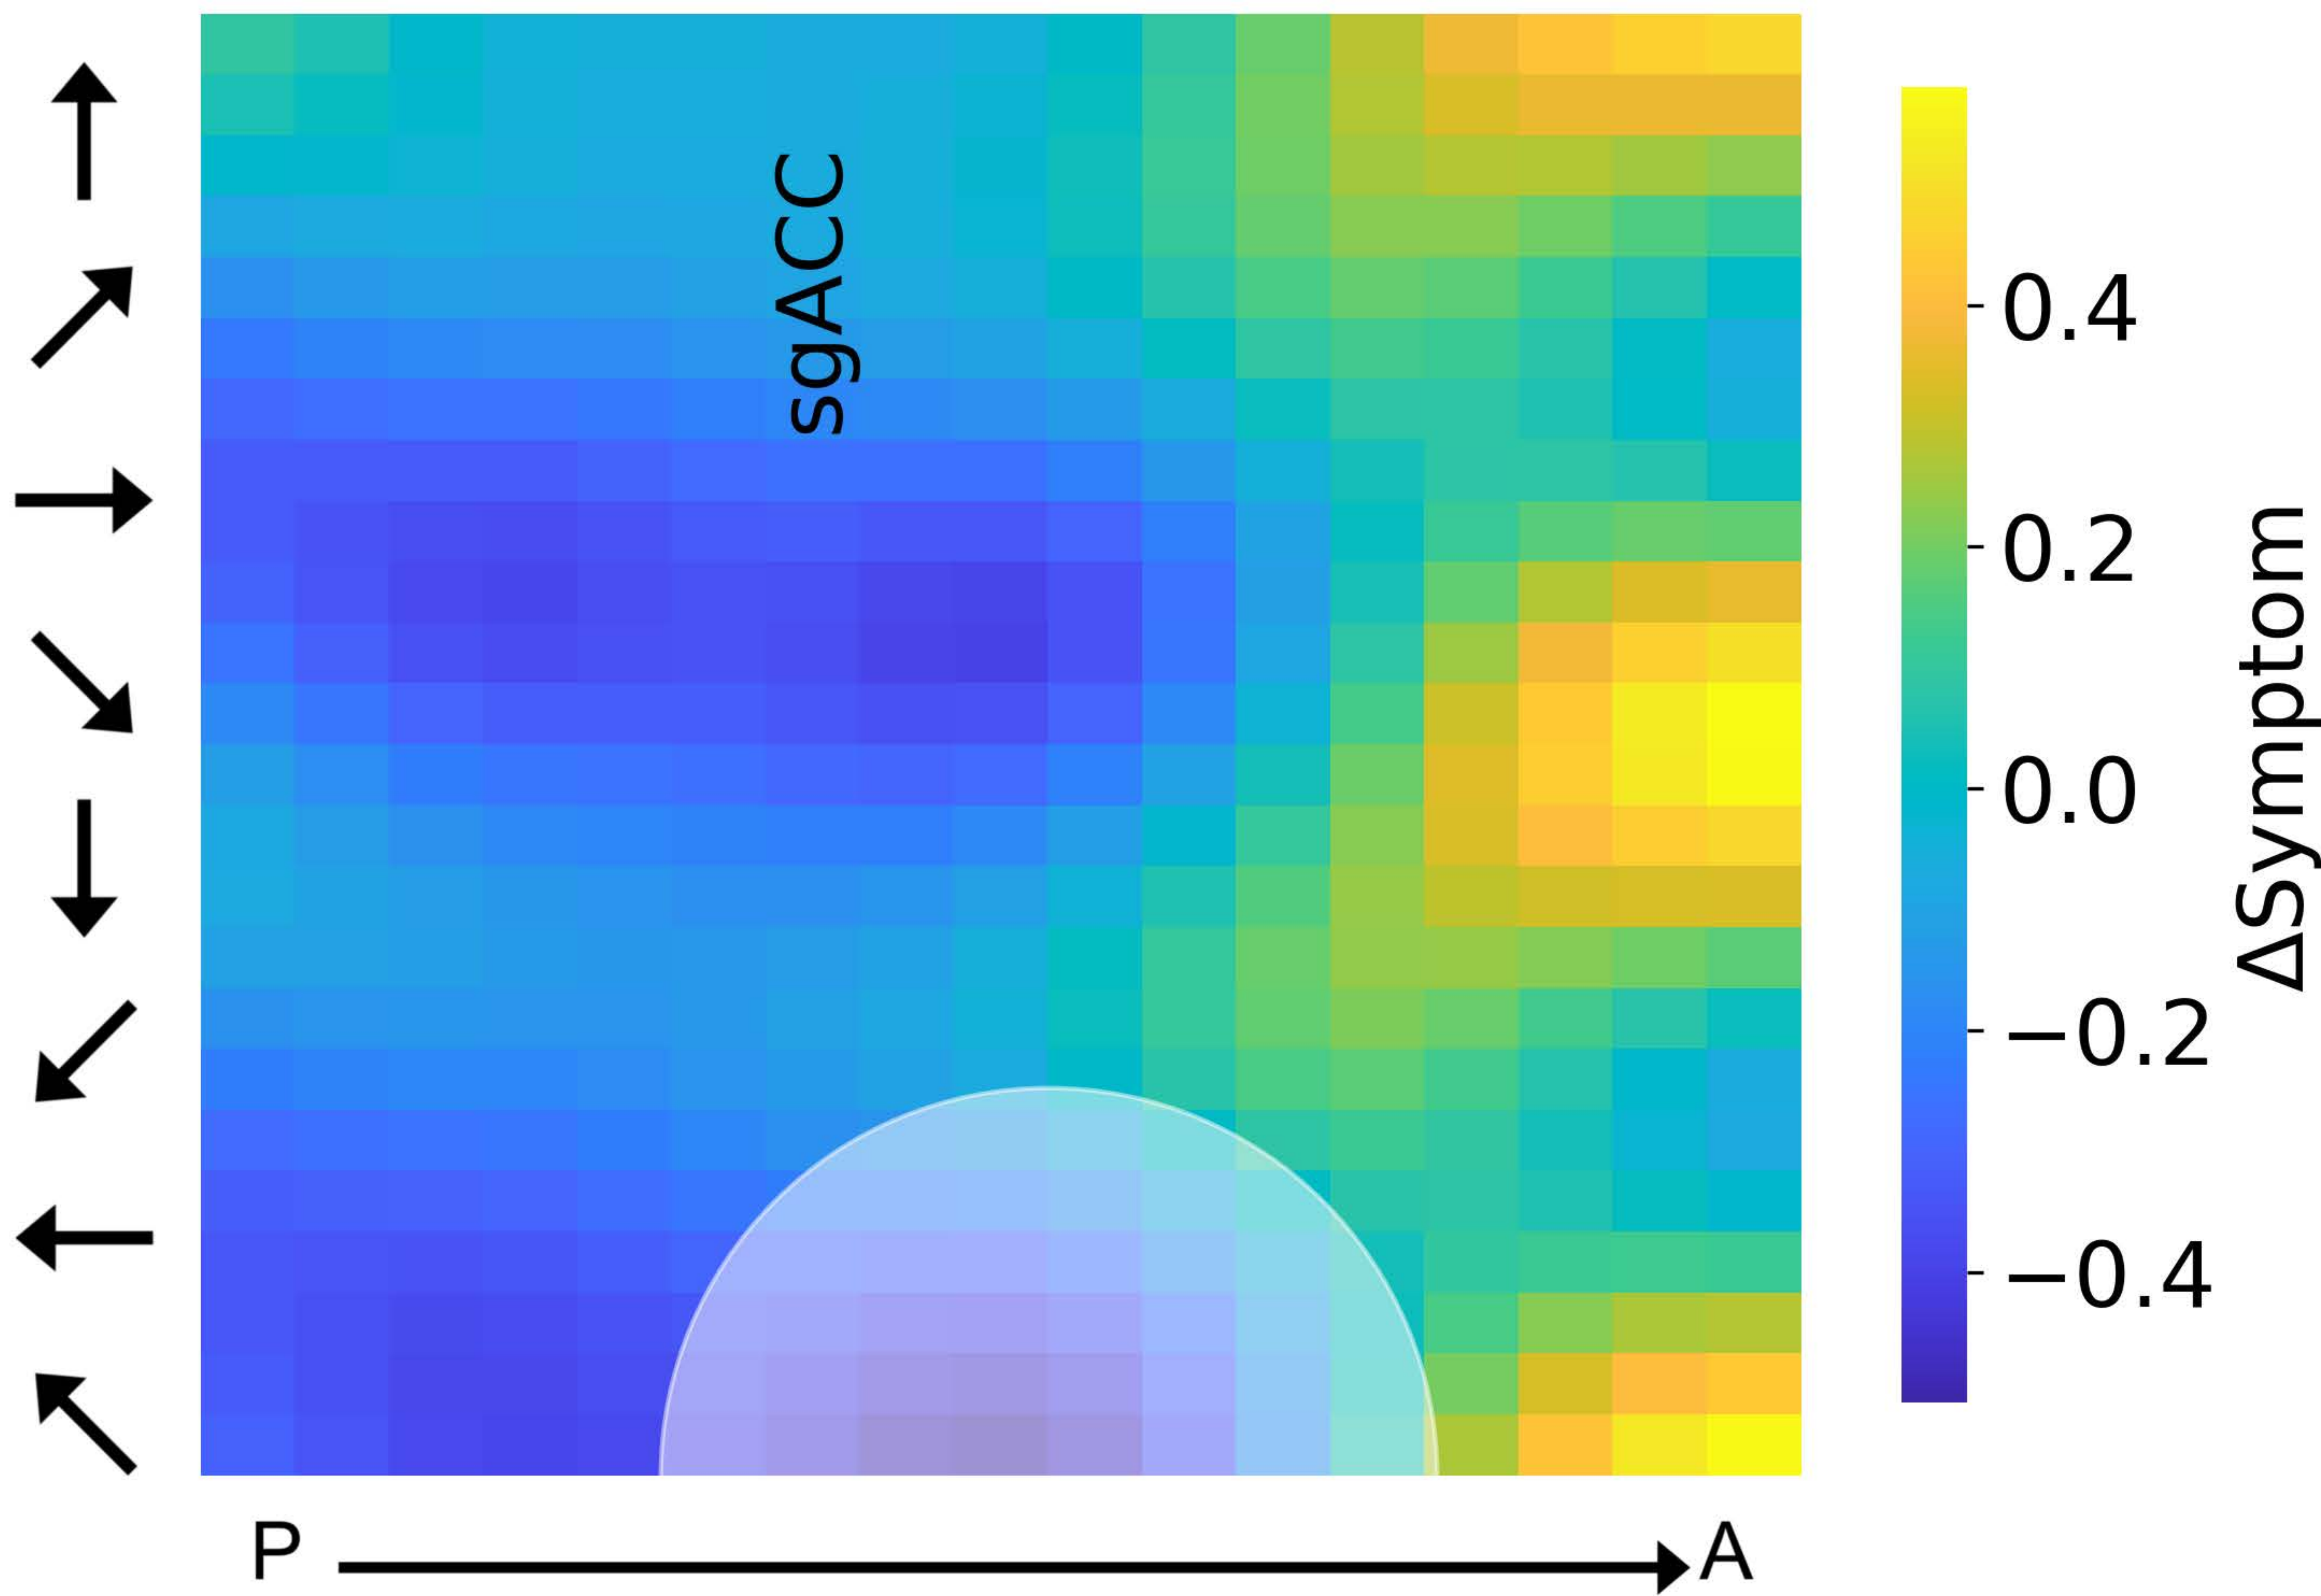



# INDARJD271PMF\_madrs\_right\_dlpfc

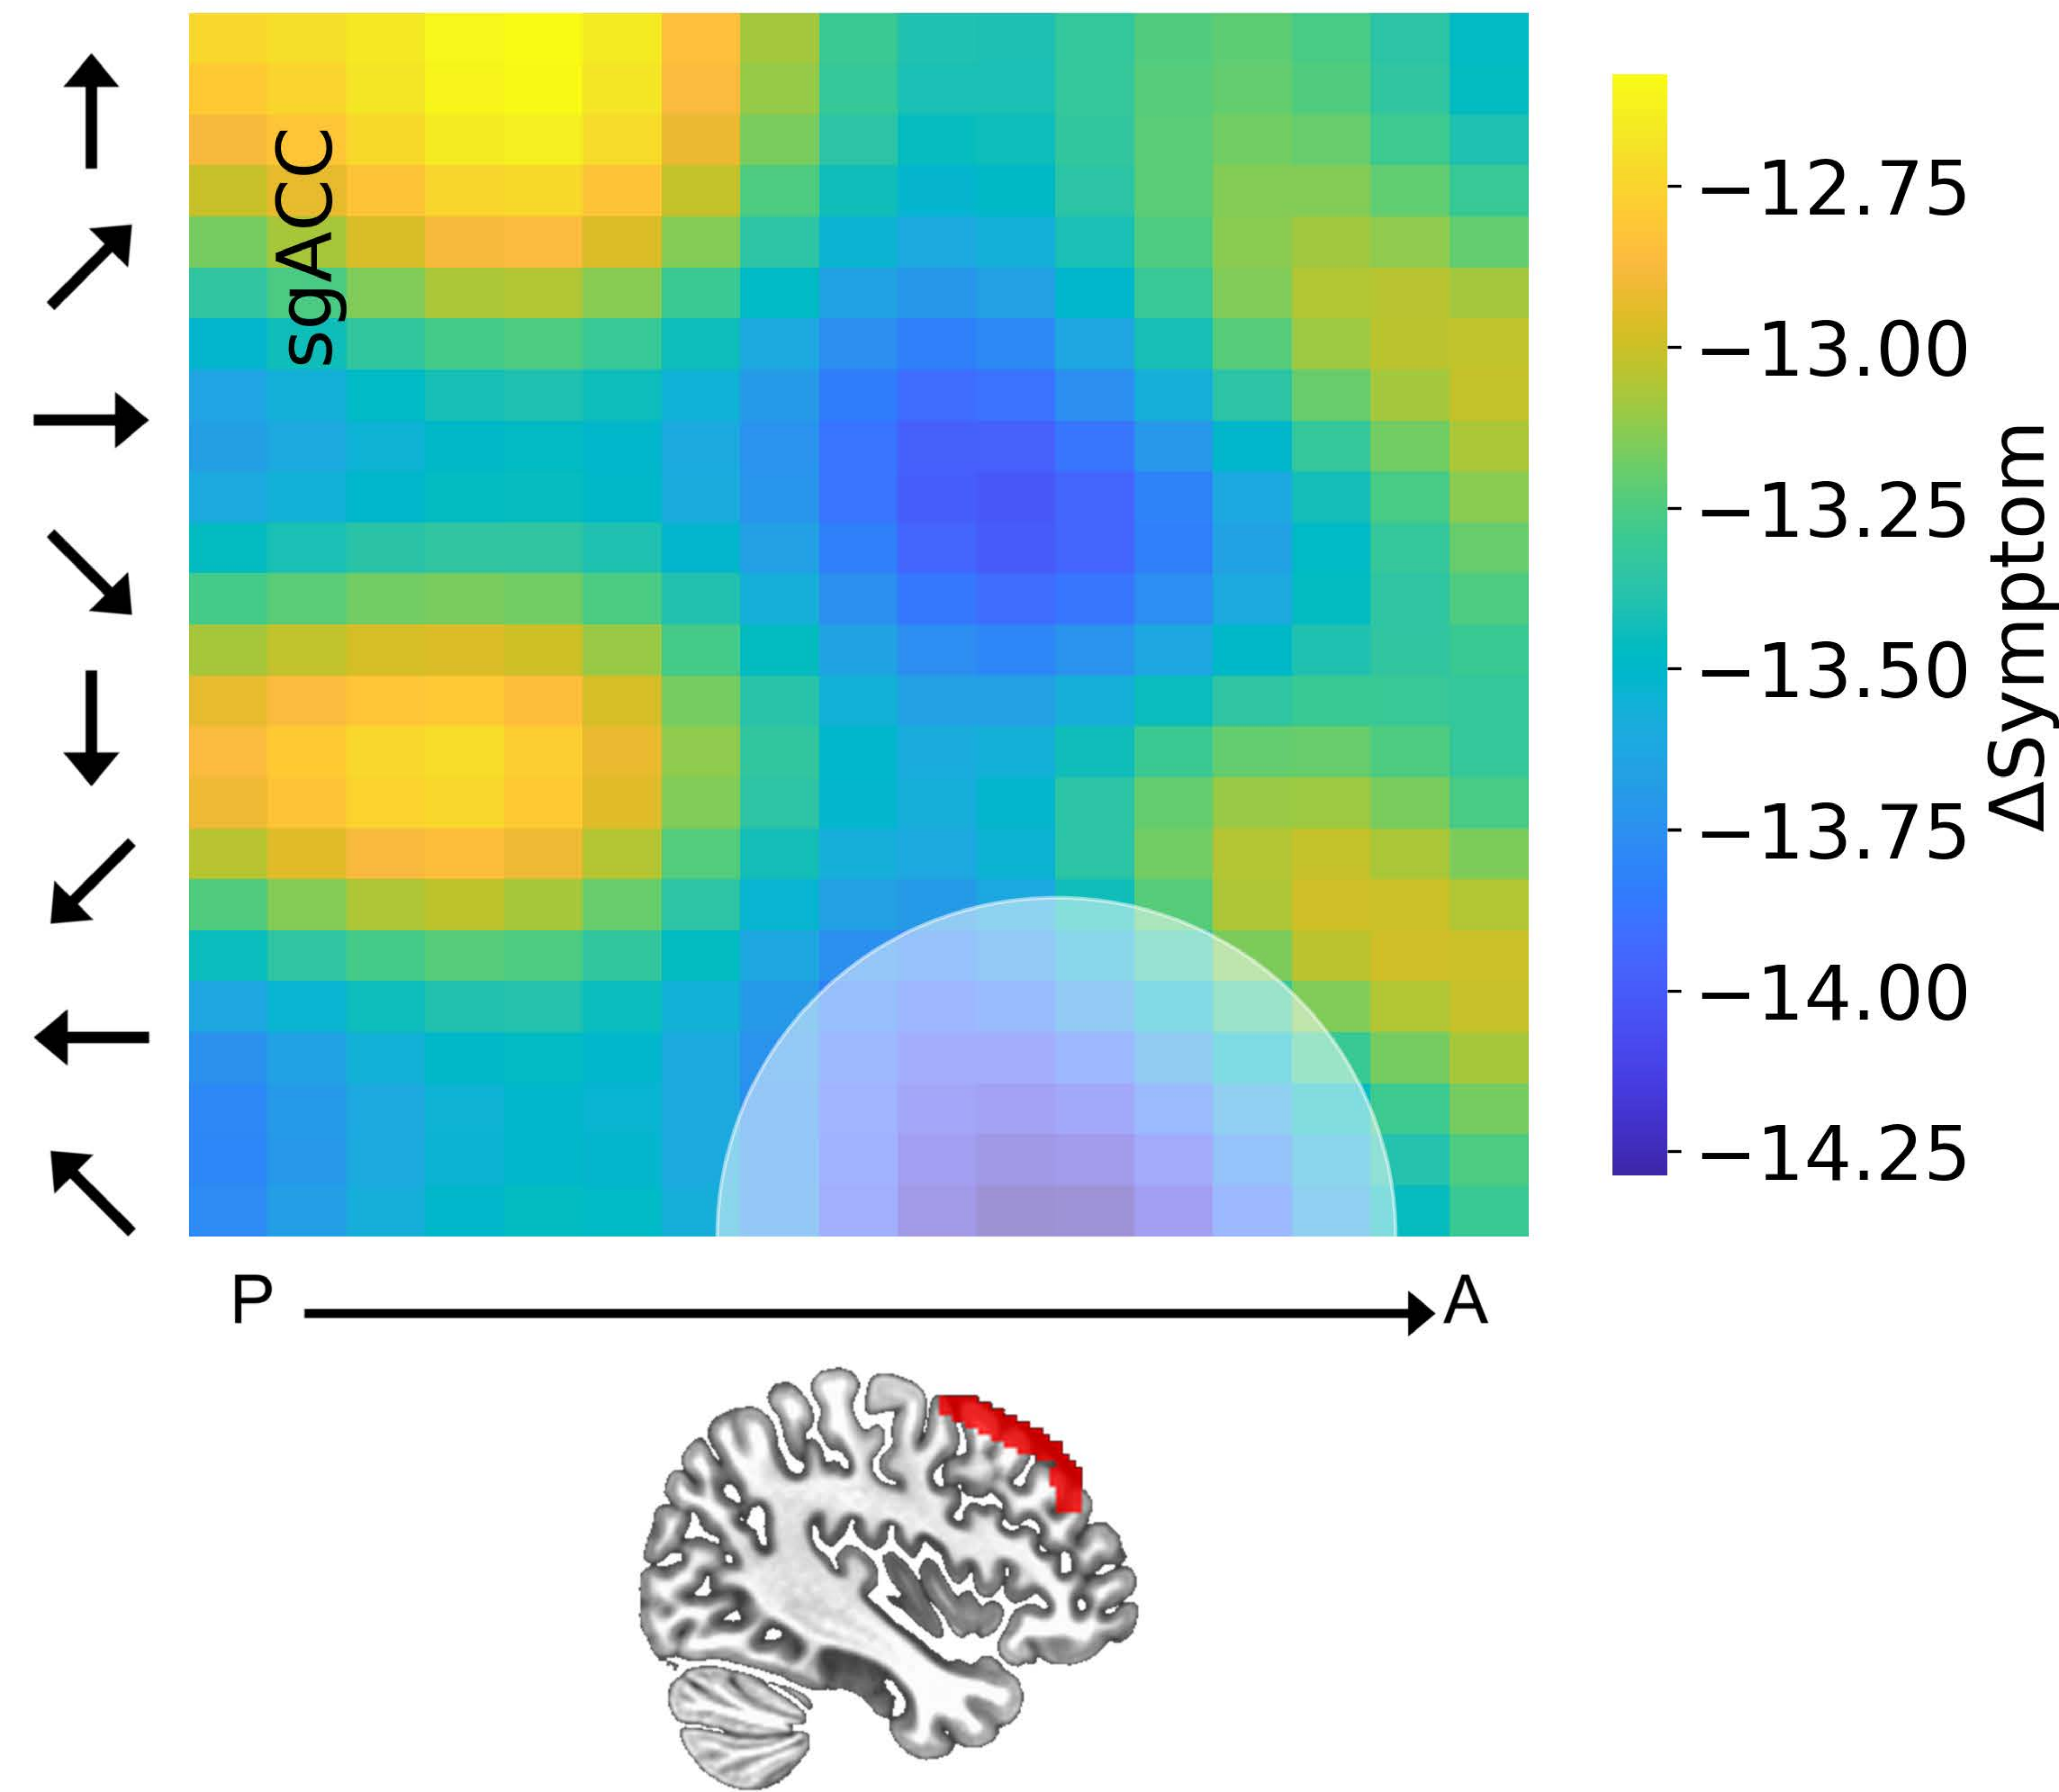



# NDARJD548GTC\_madrs\_right\_dlpfc

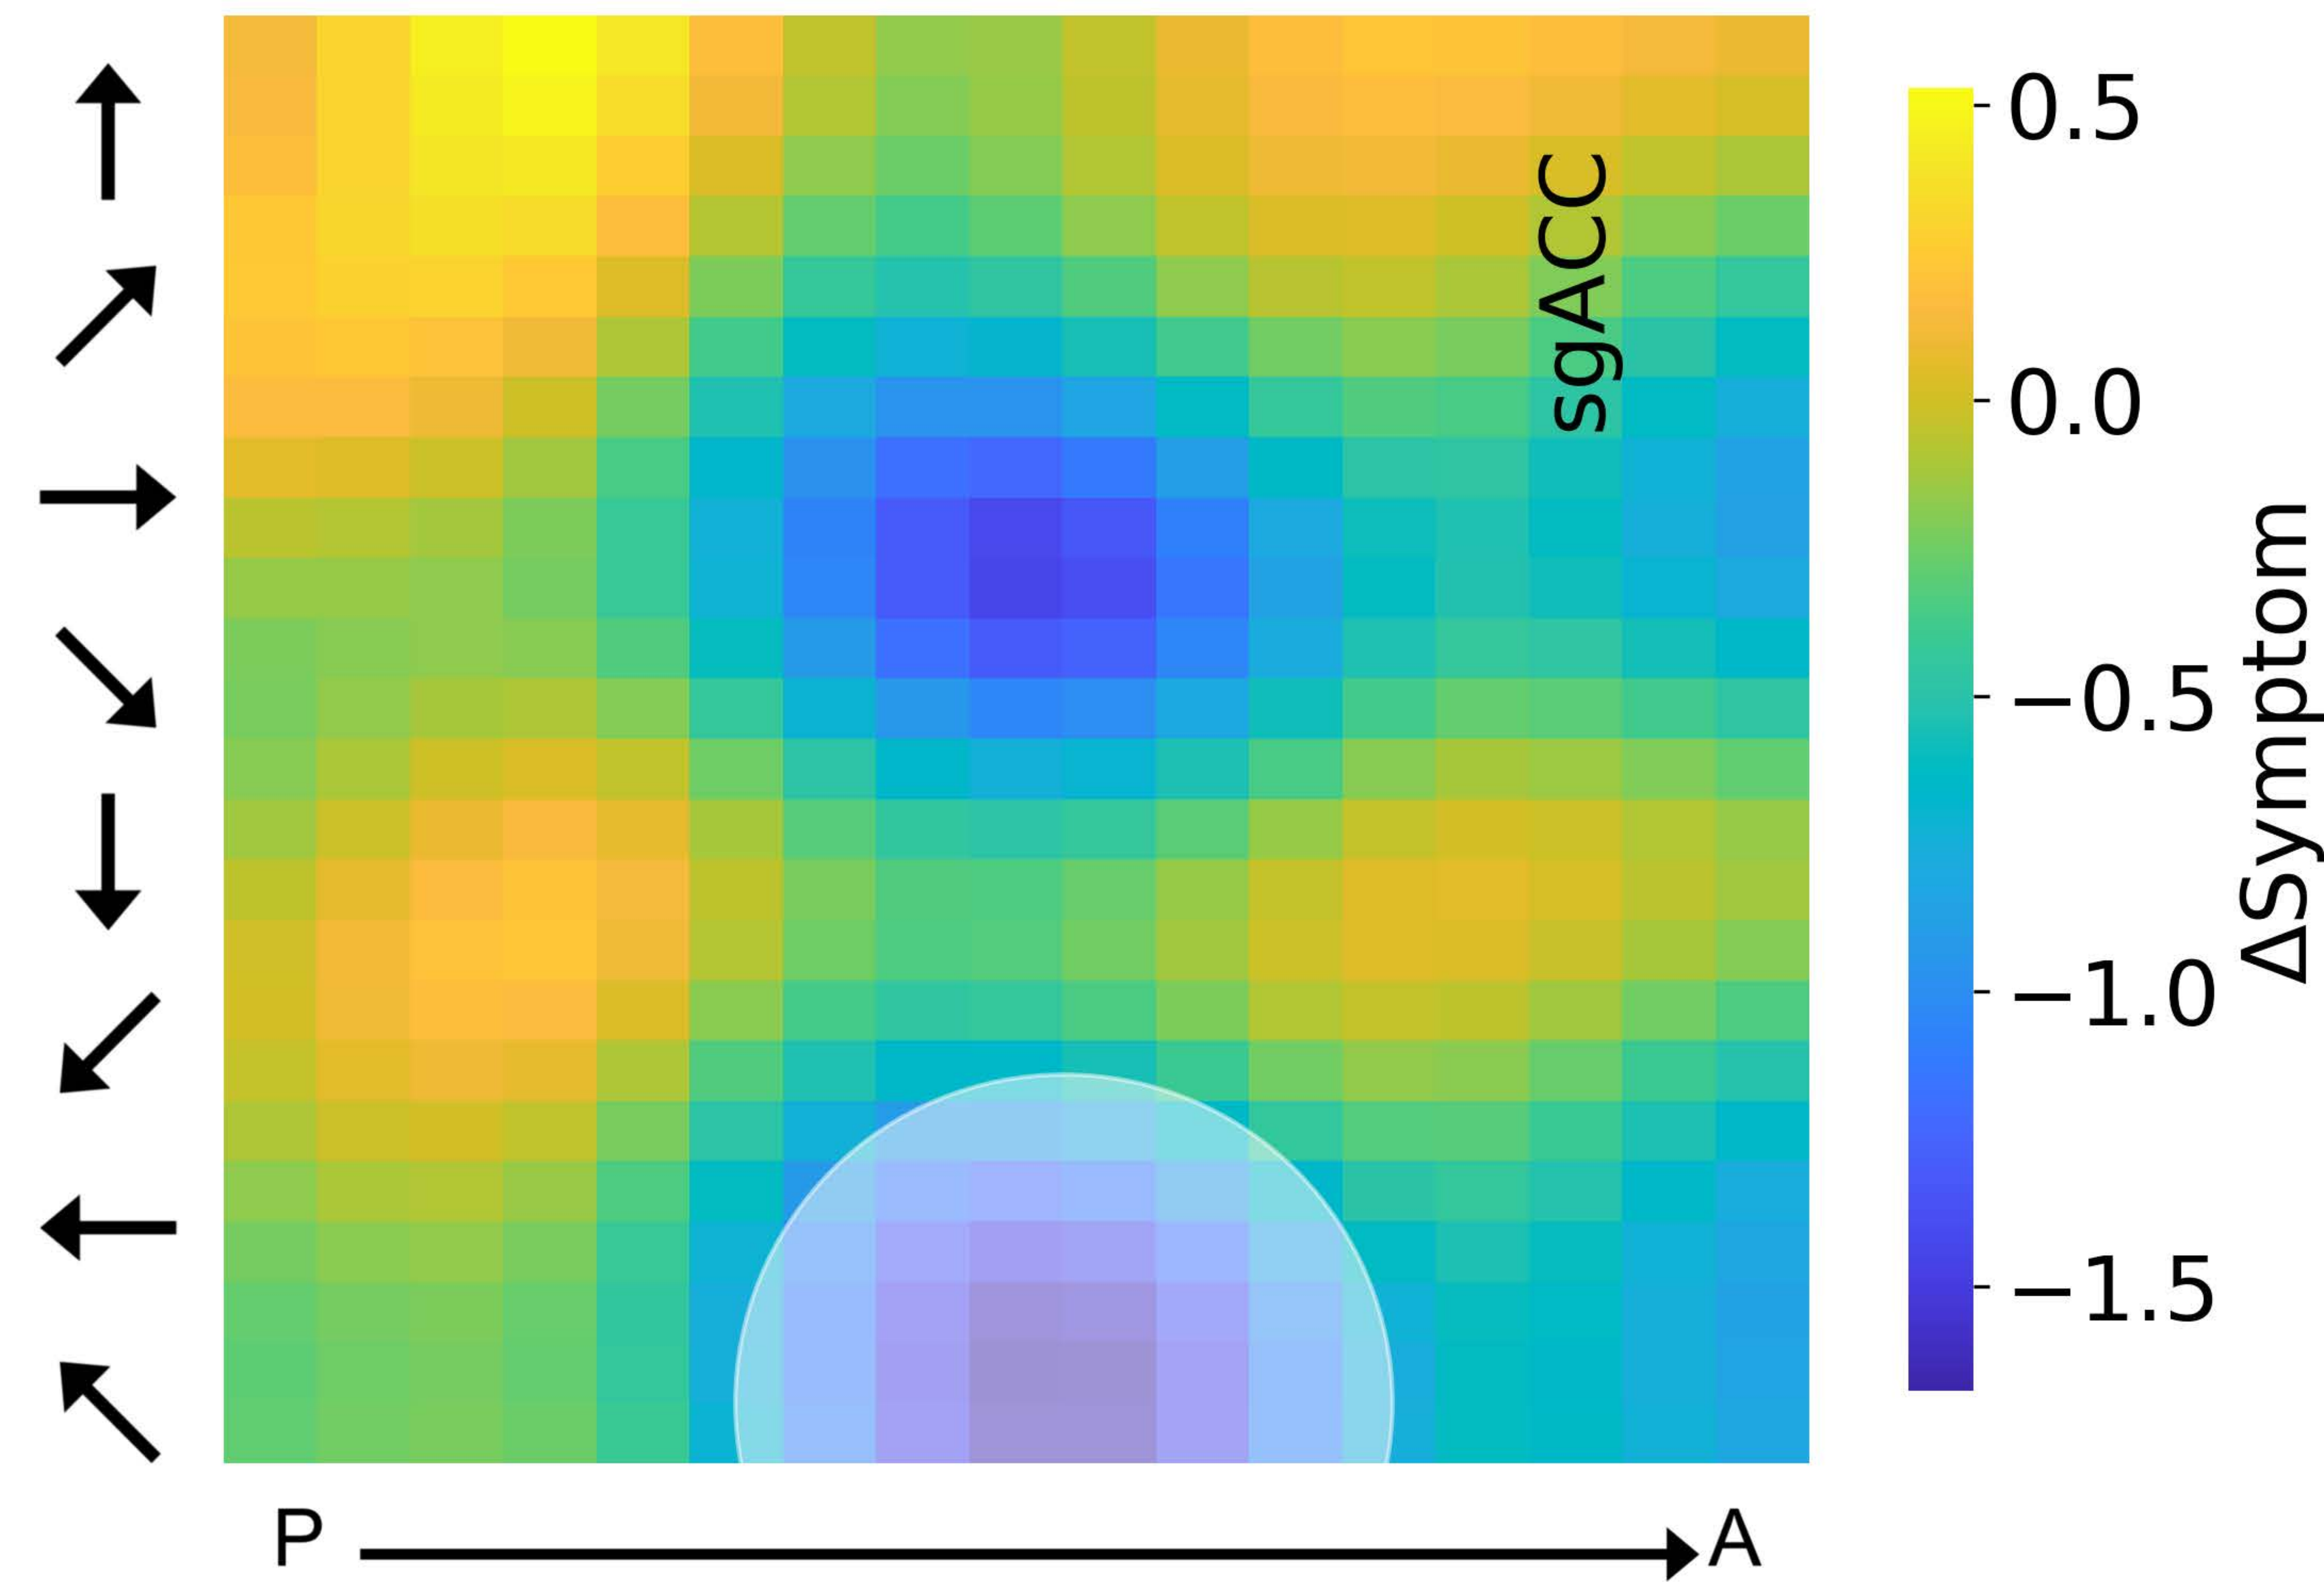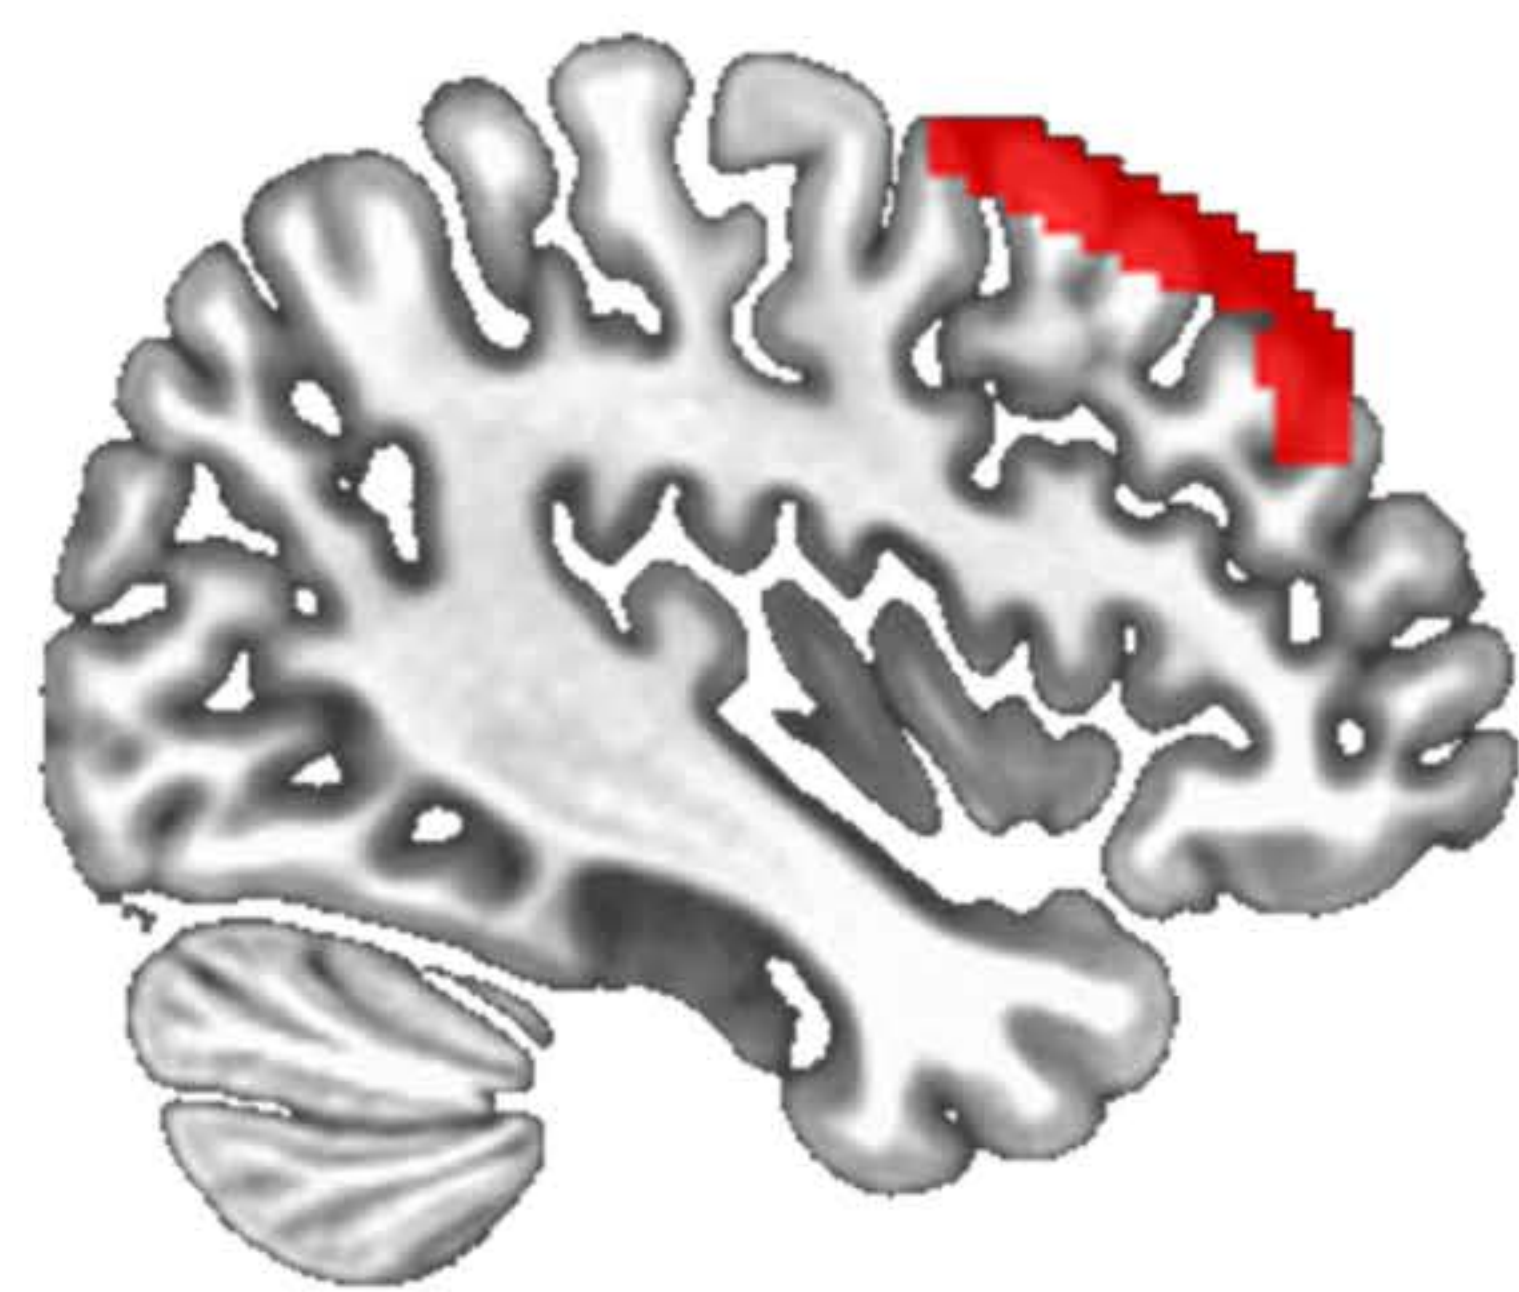



# NDARJF993NV1\_madrs\_right\_dlpfc

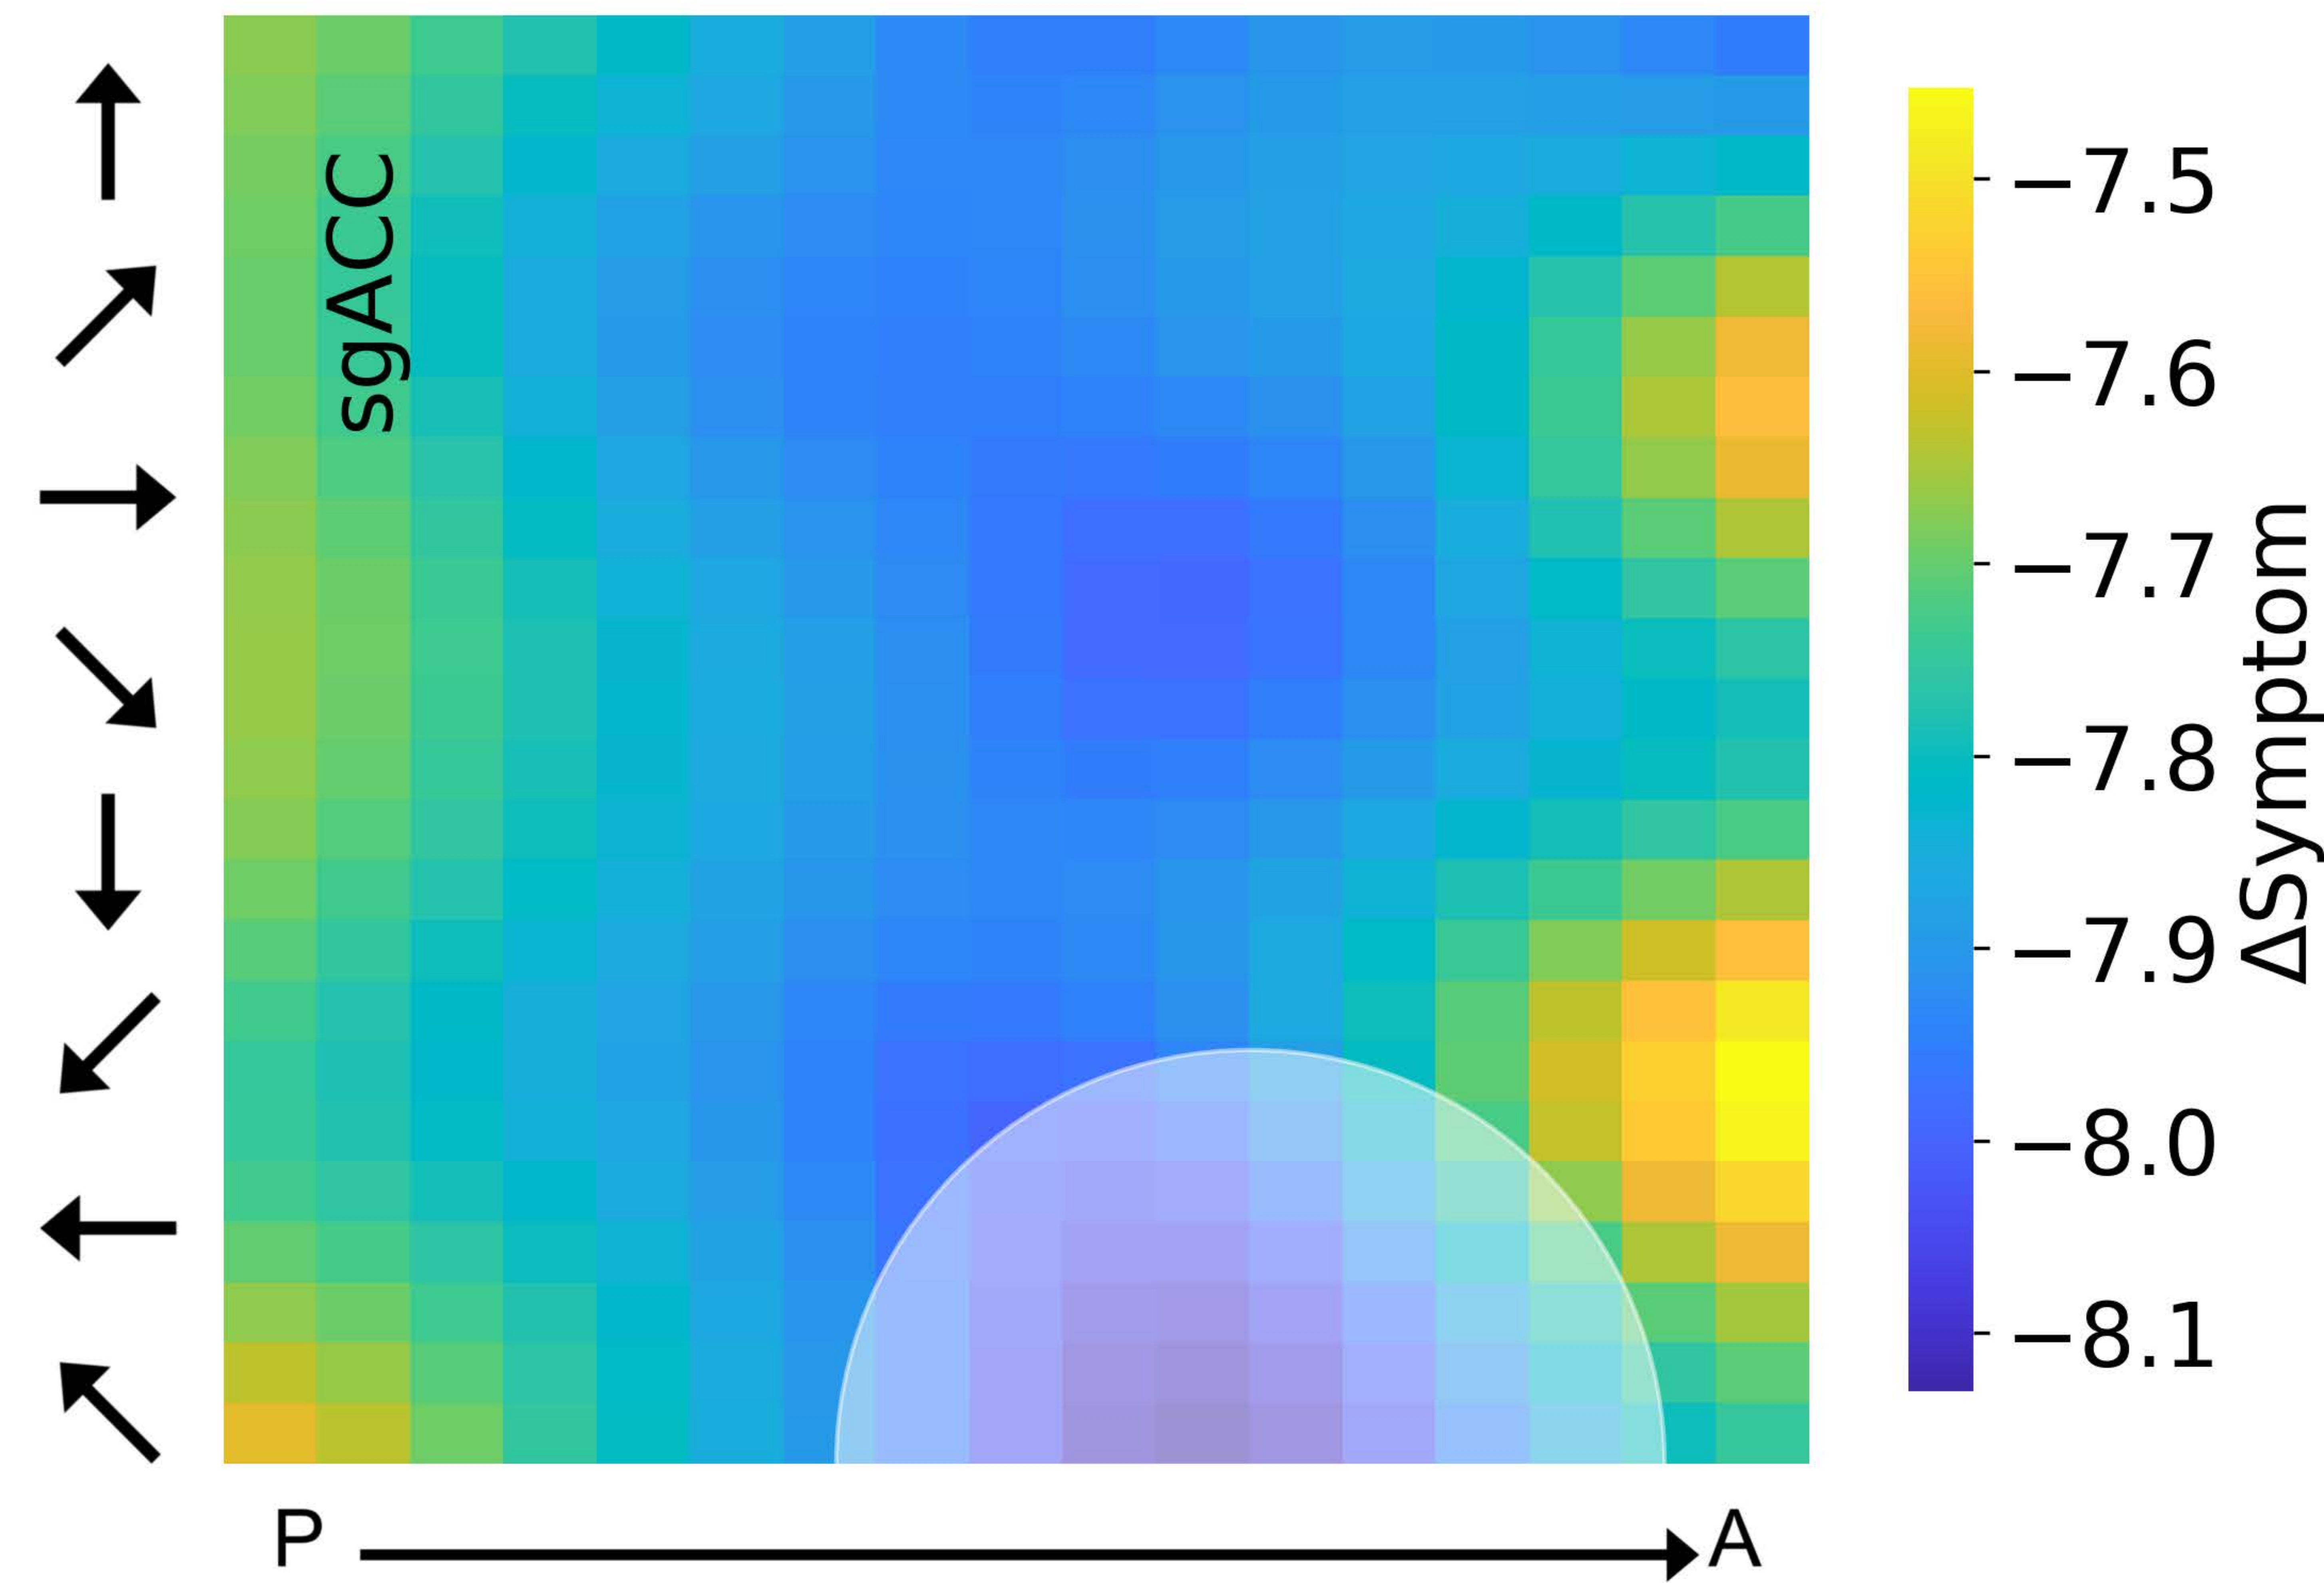



# NDARJH406WC9\_madrs\_right\_dlpfc

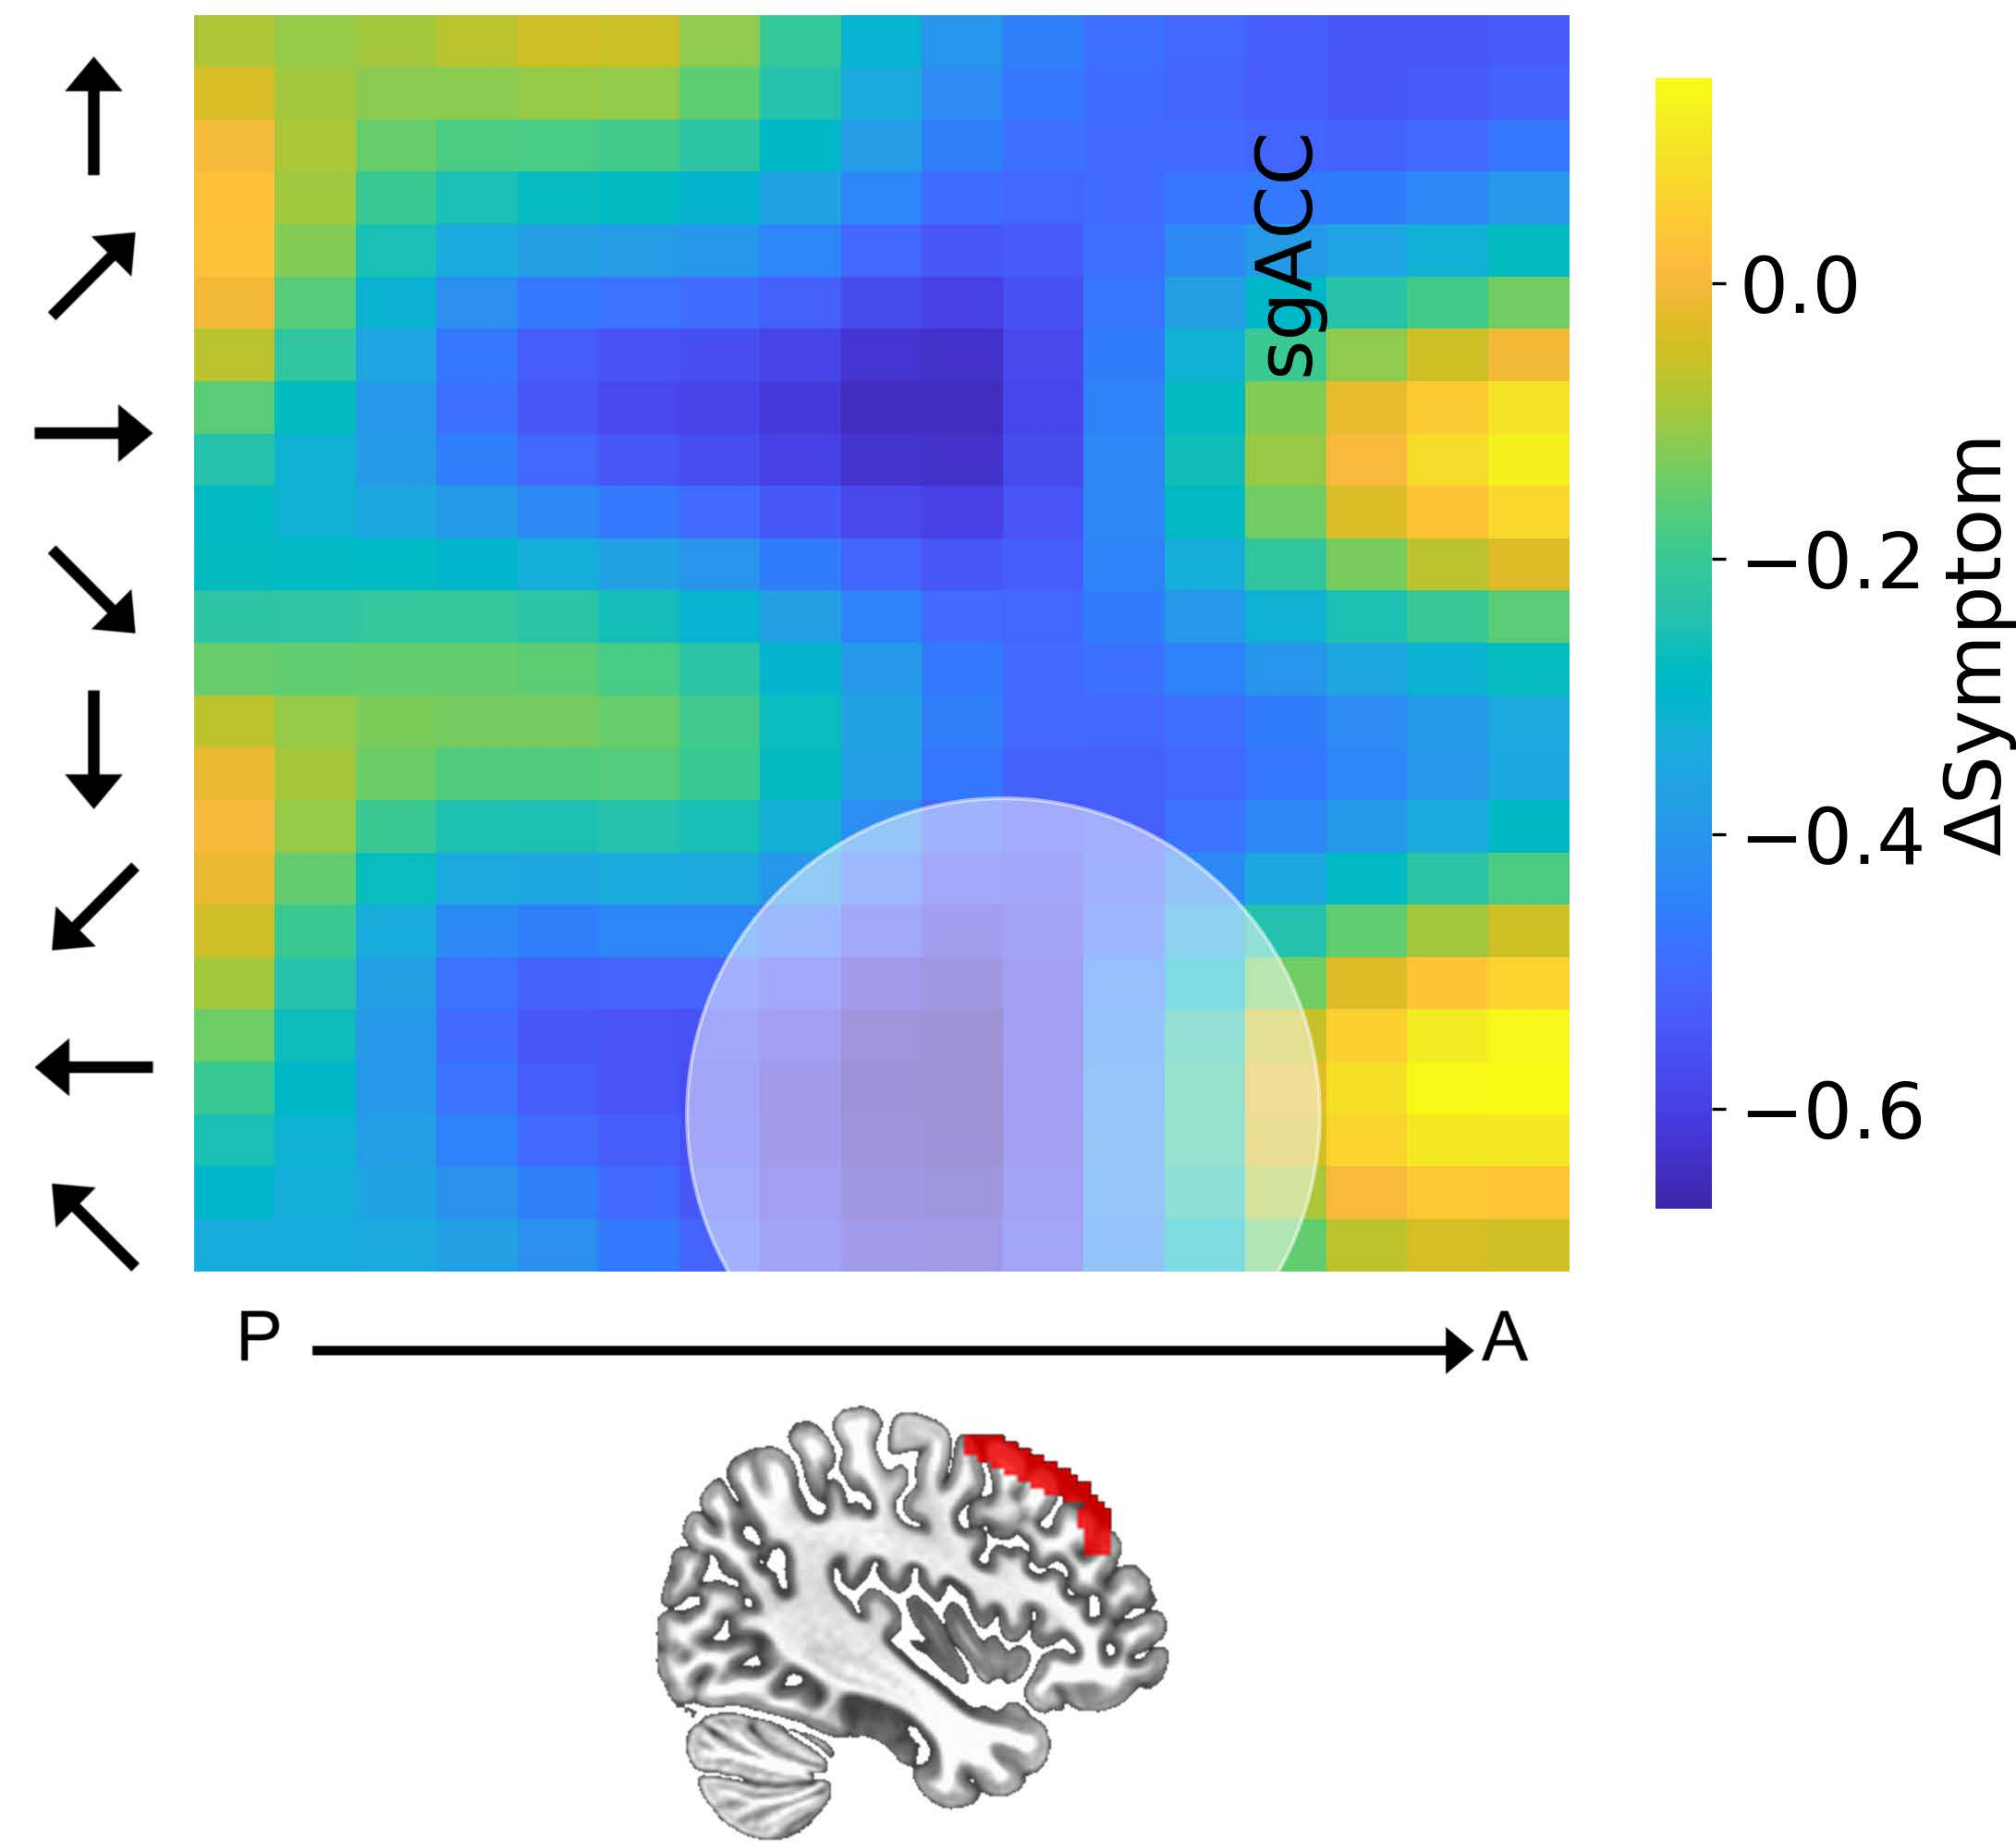



# NDARJX575DVK\_madrs\_right\_dlpfc

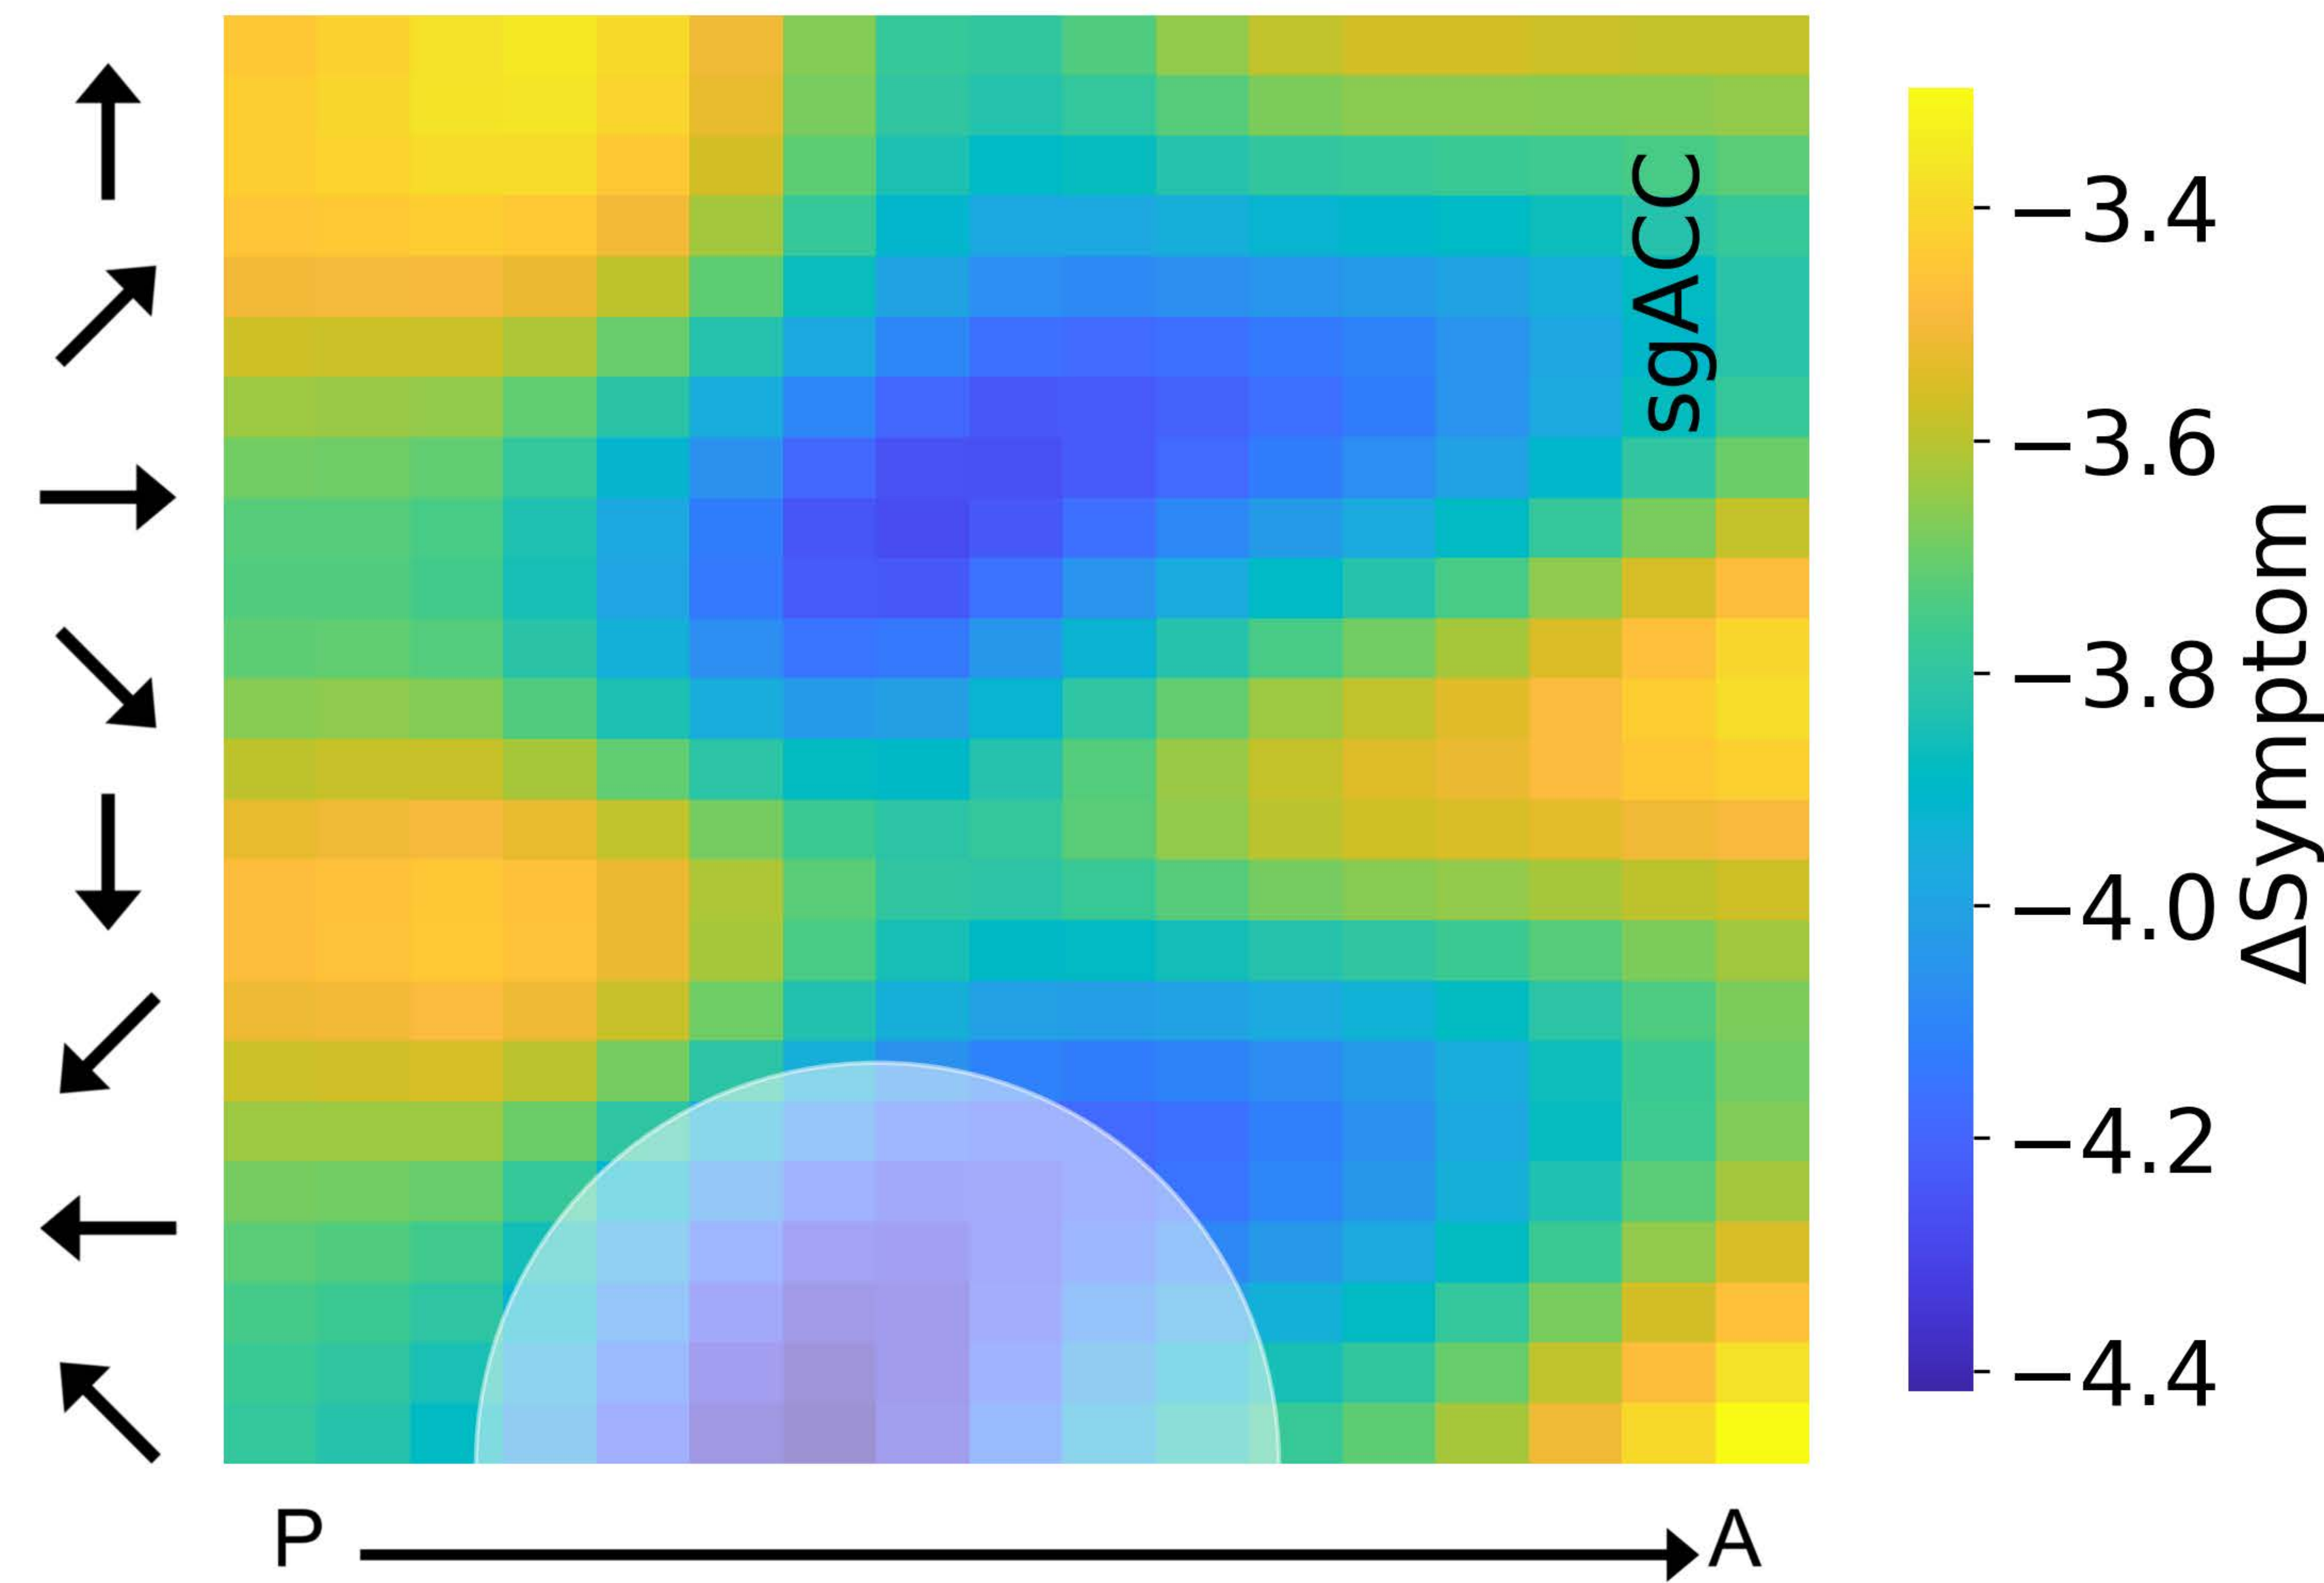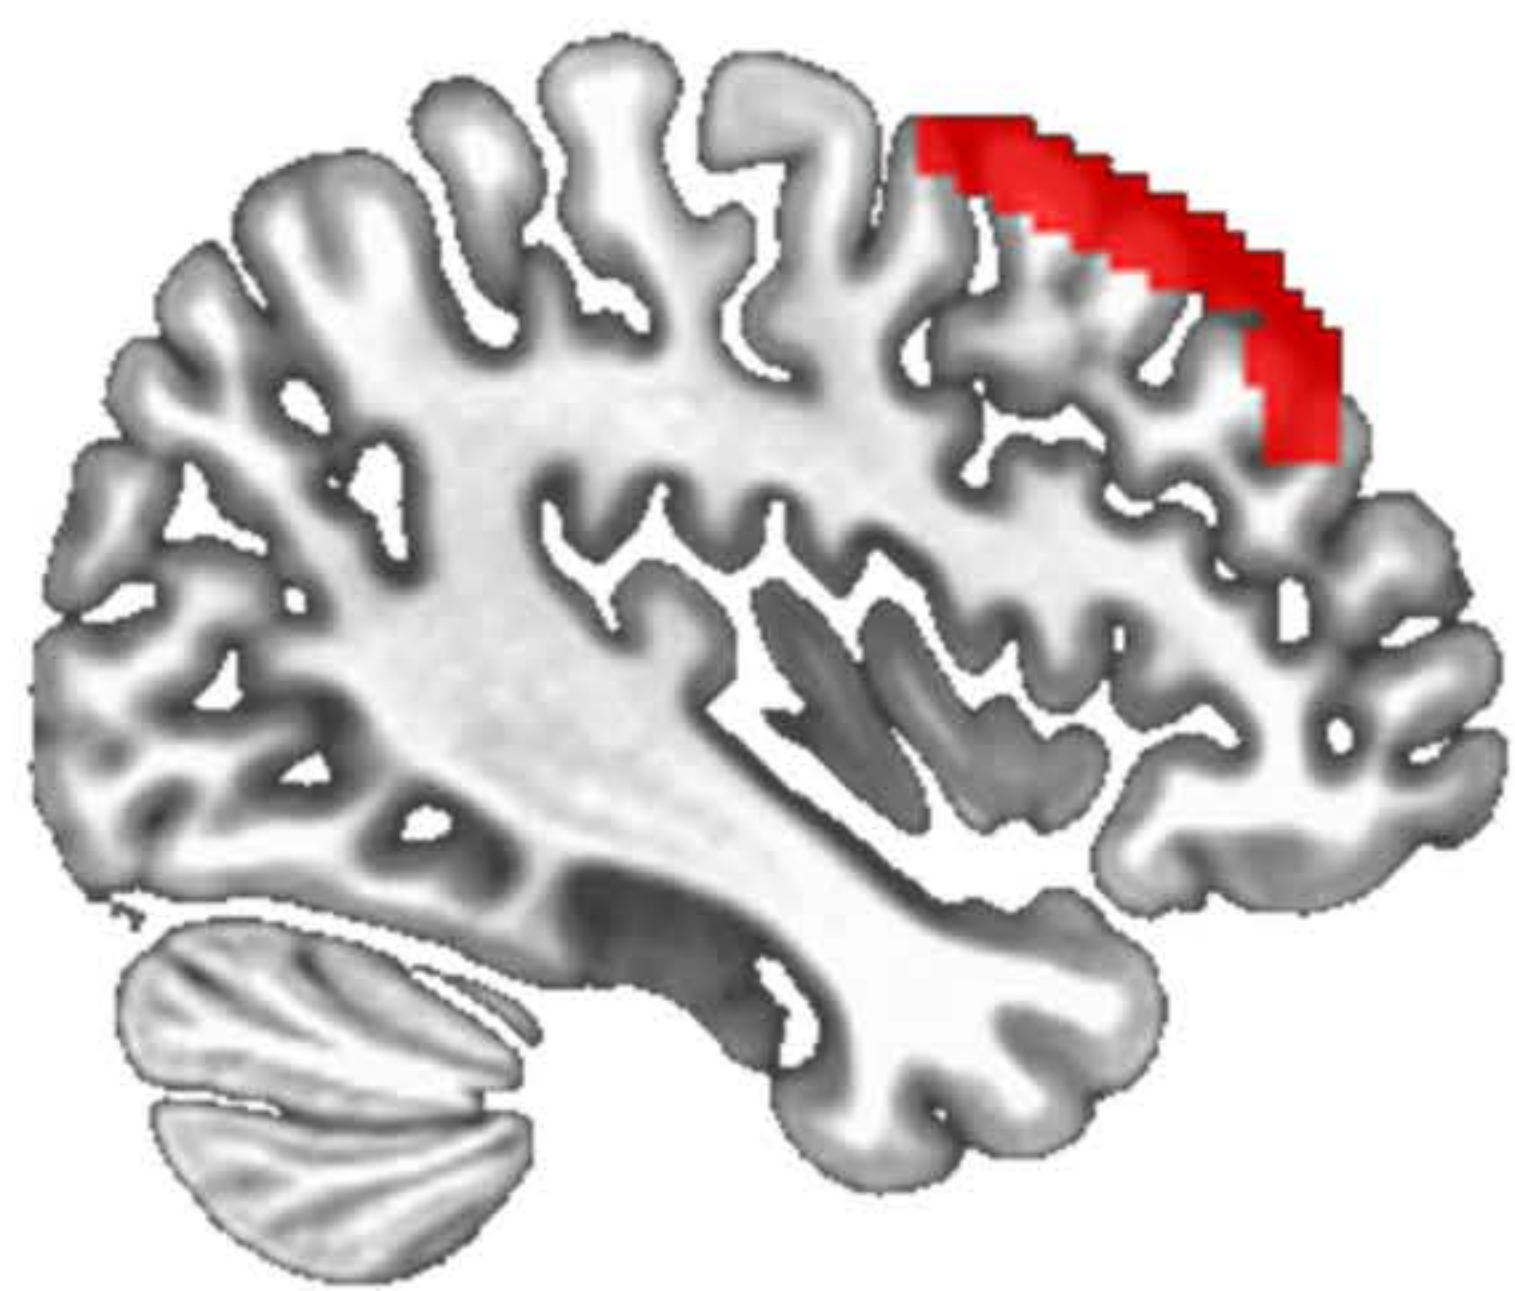



# NDARJY042TLY\_madrs\_right\_dlpfc

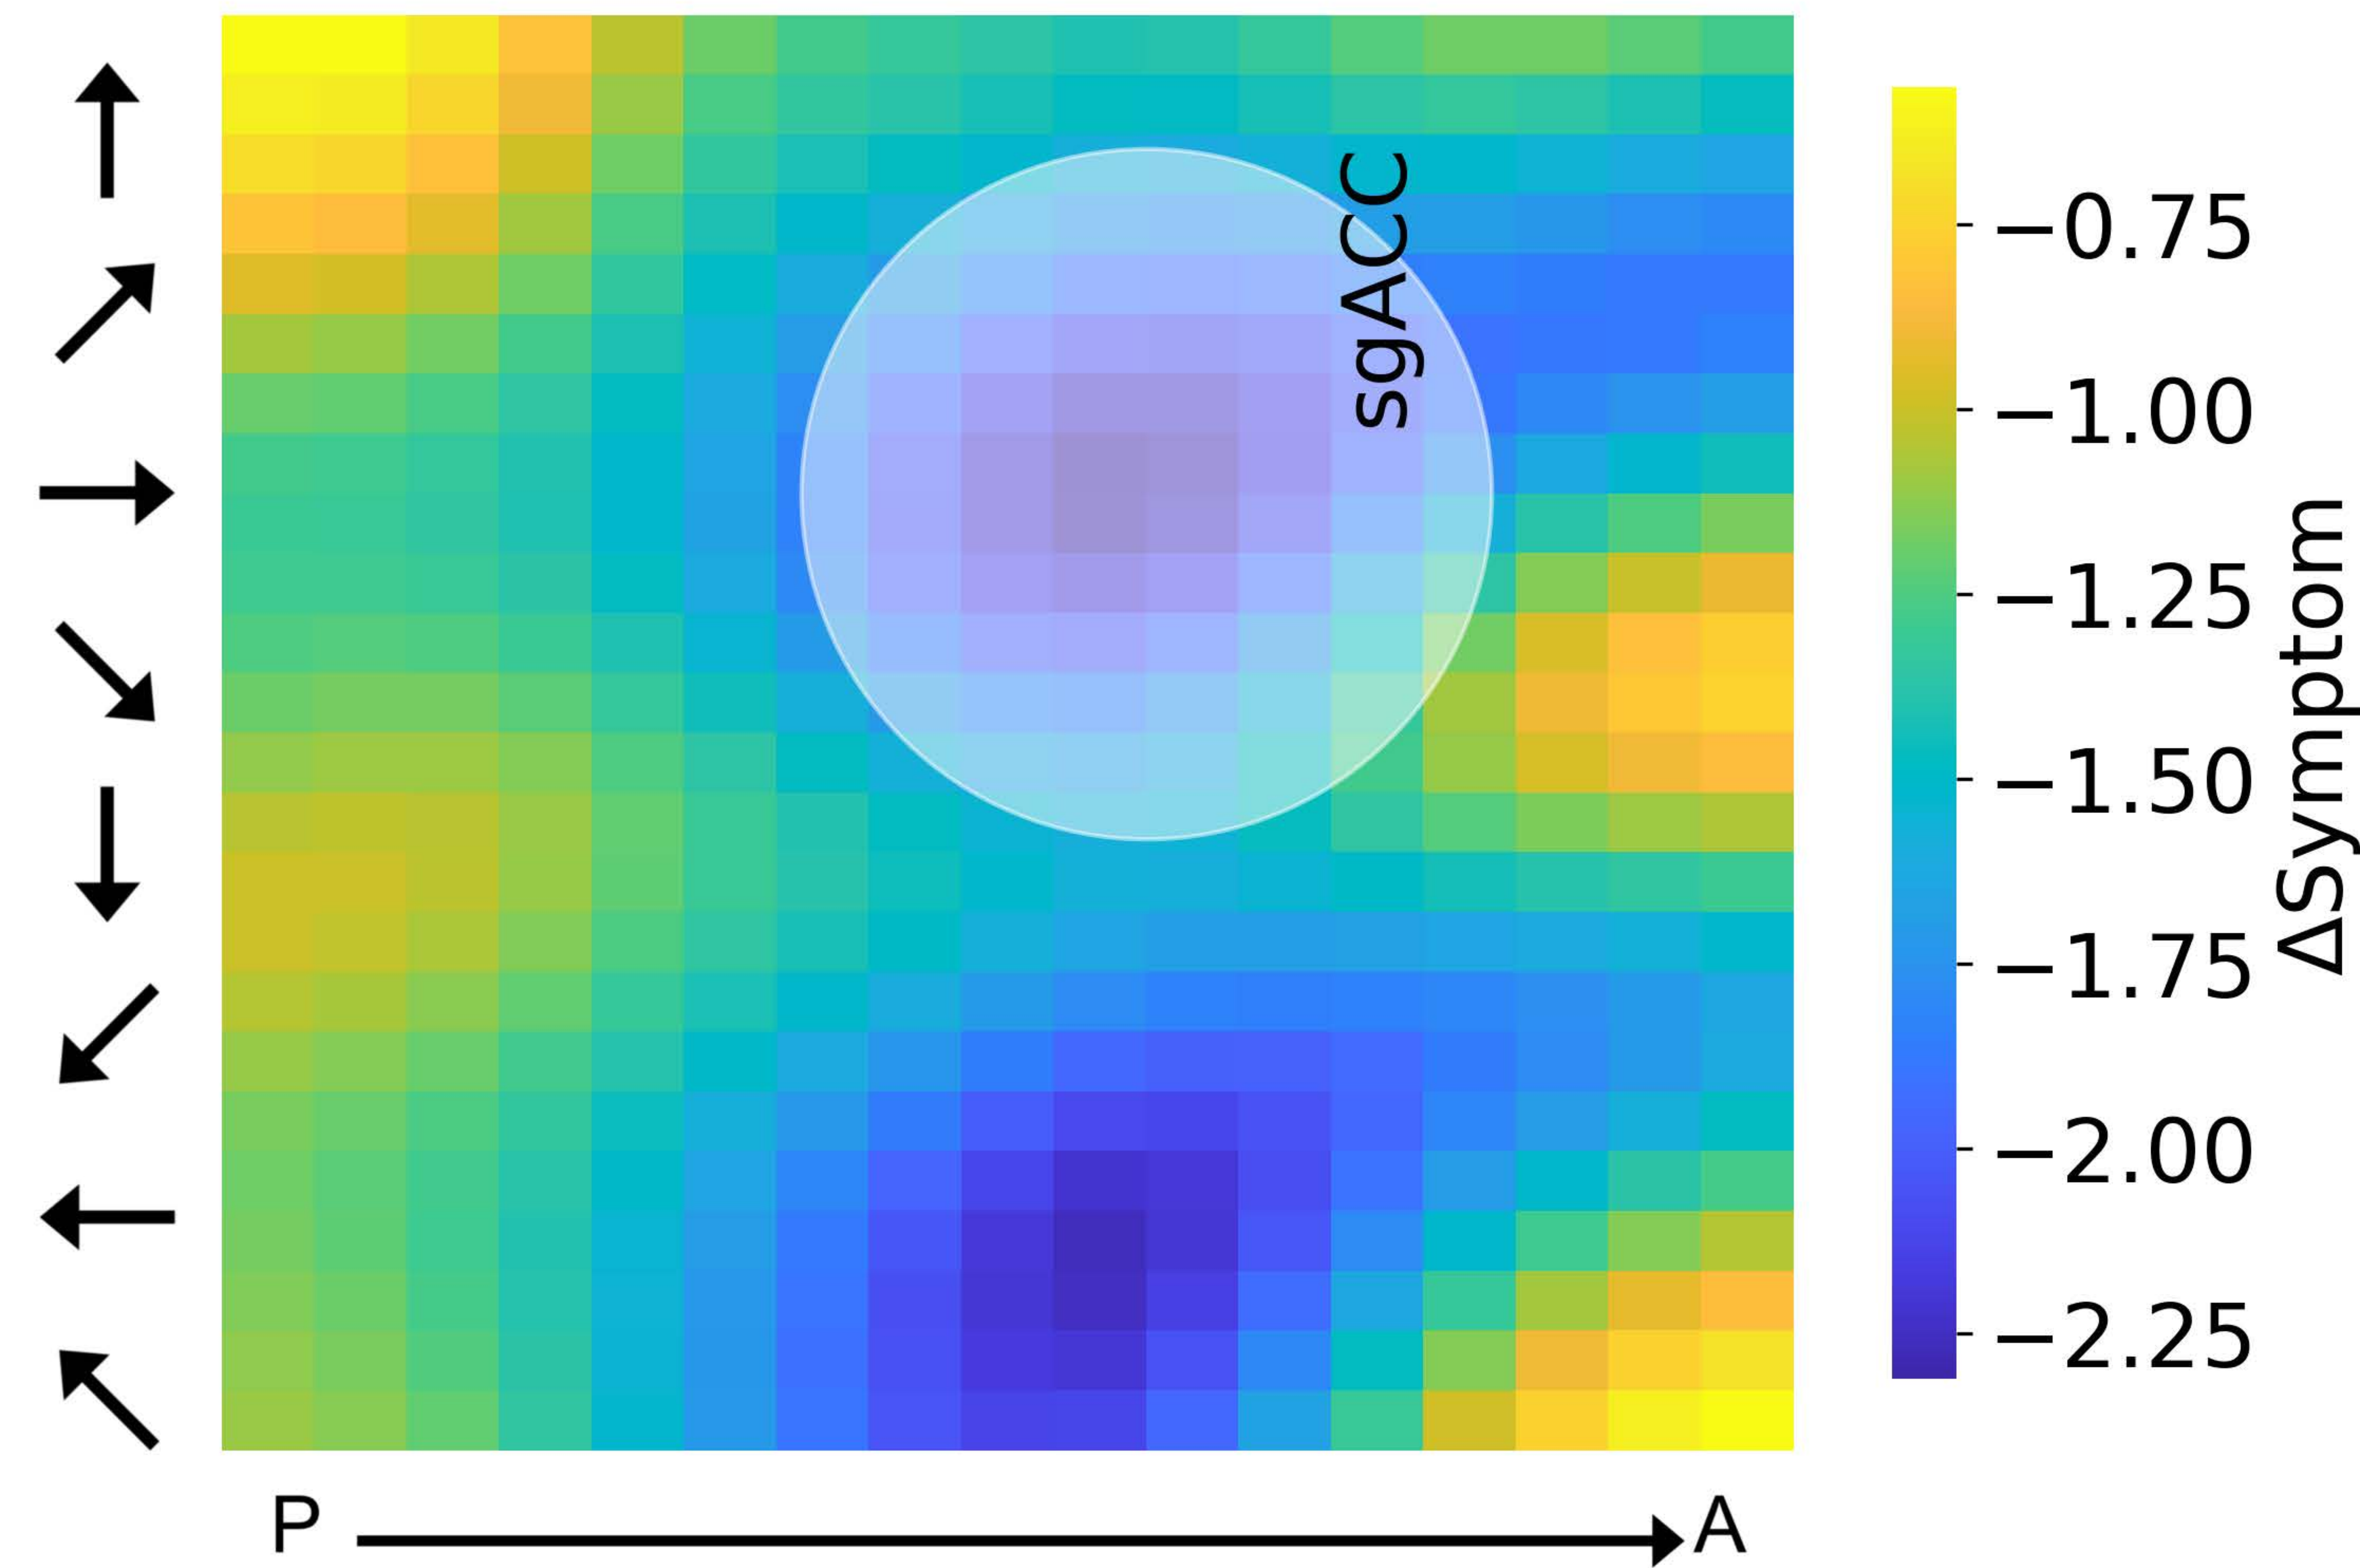



# NDARKK212YTX\_madr\_right\_dlpfc

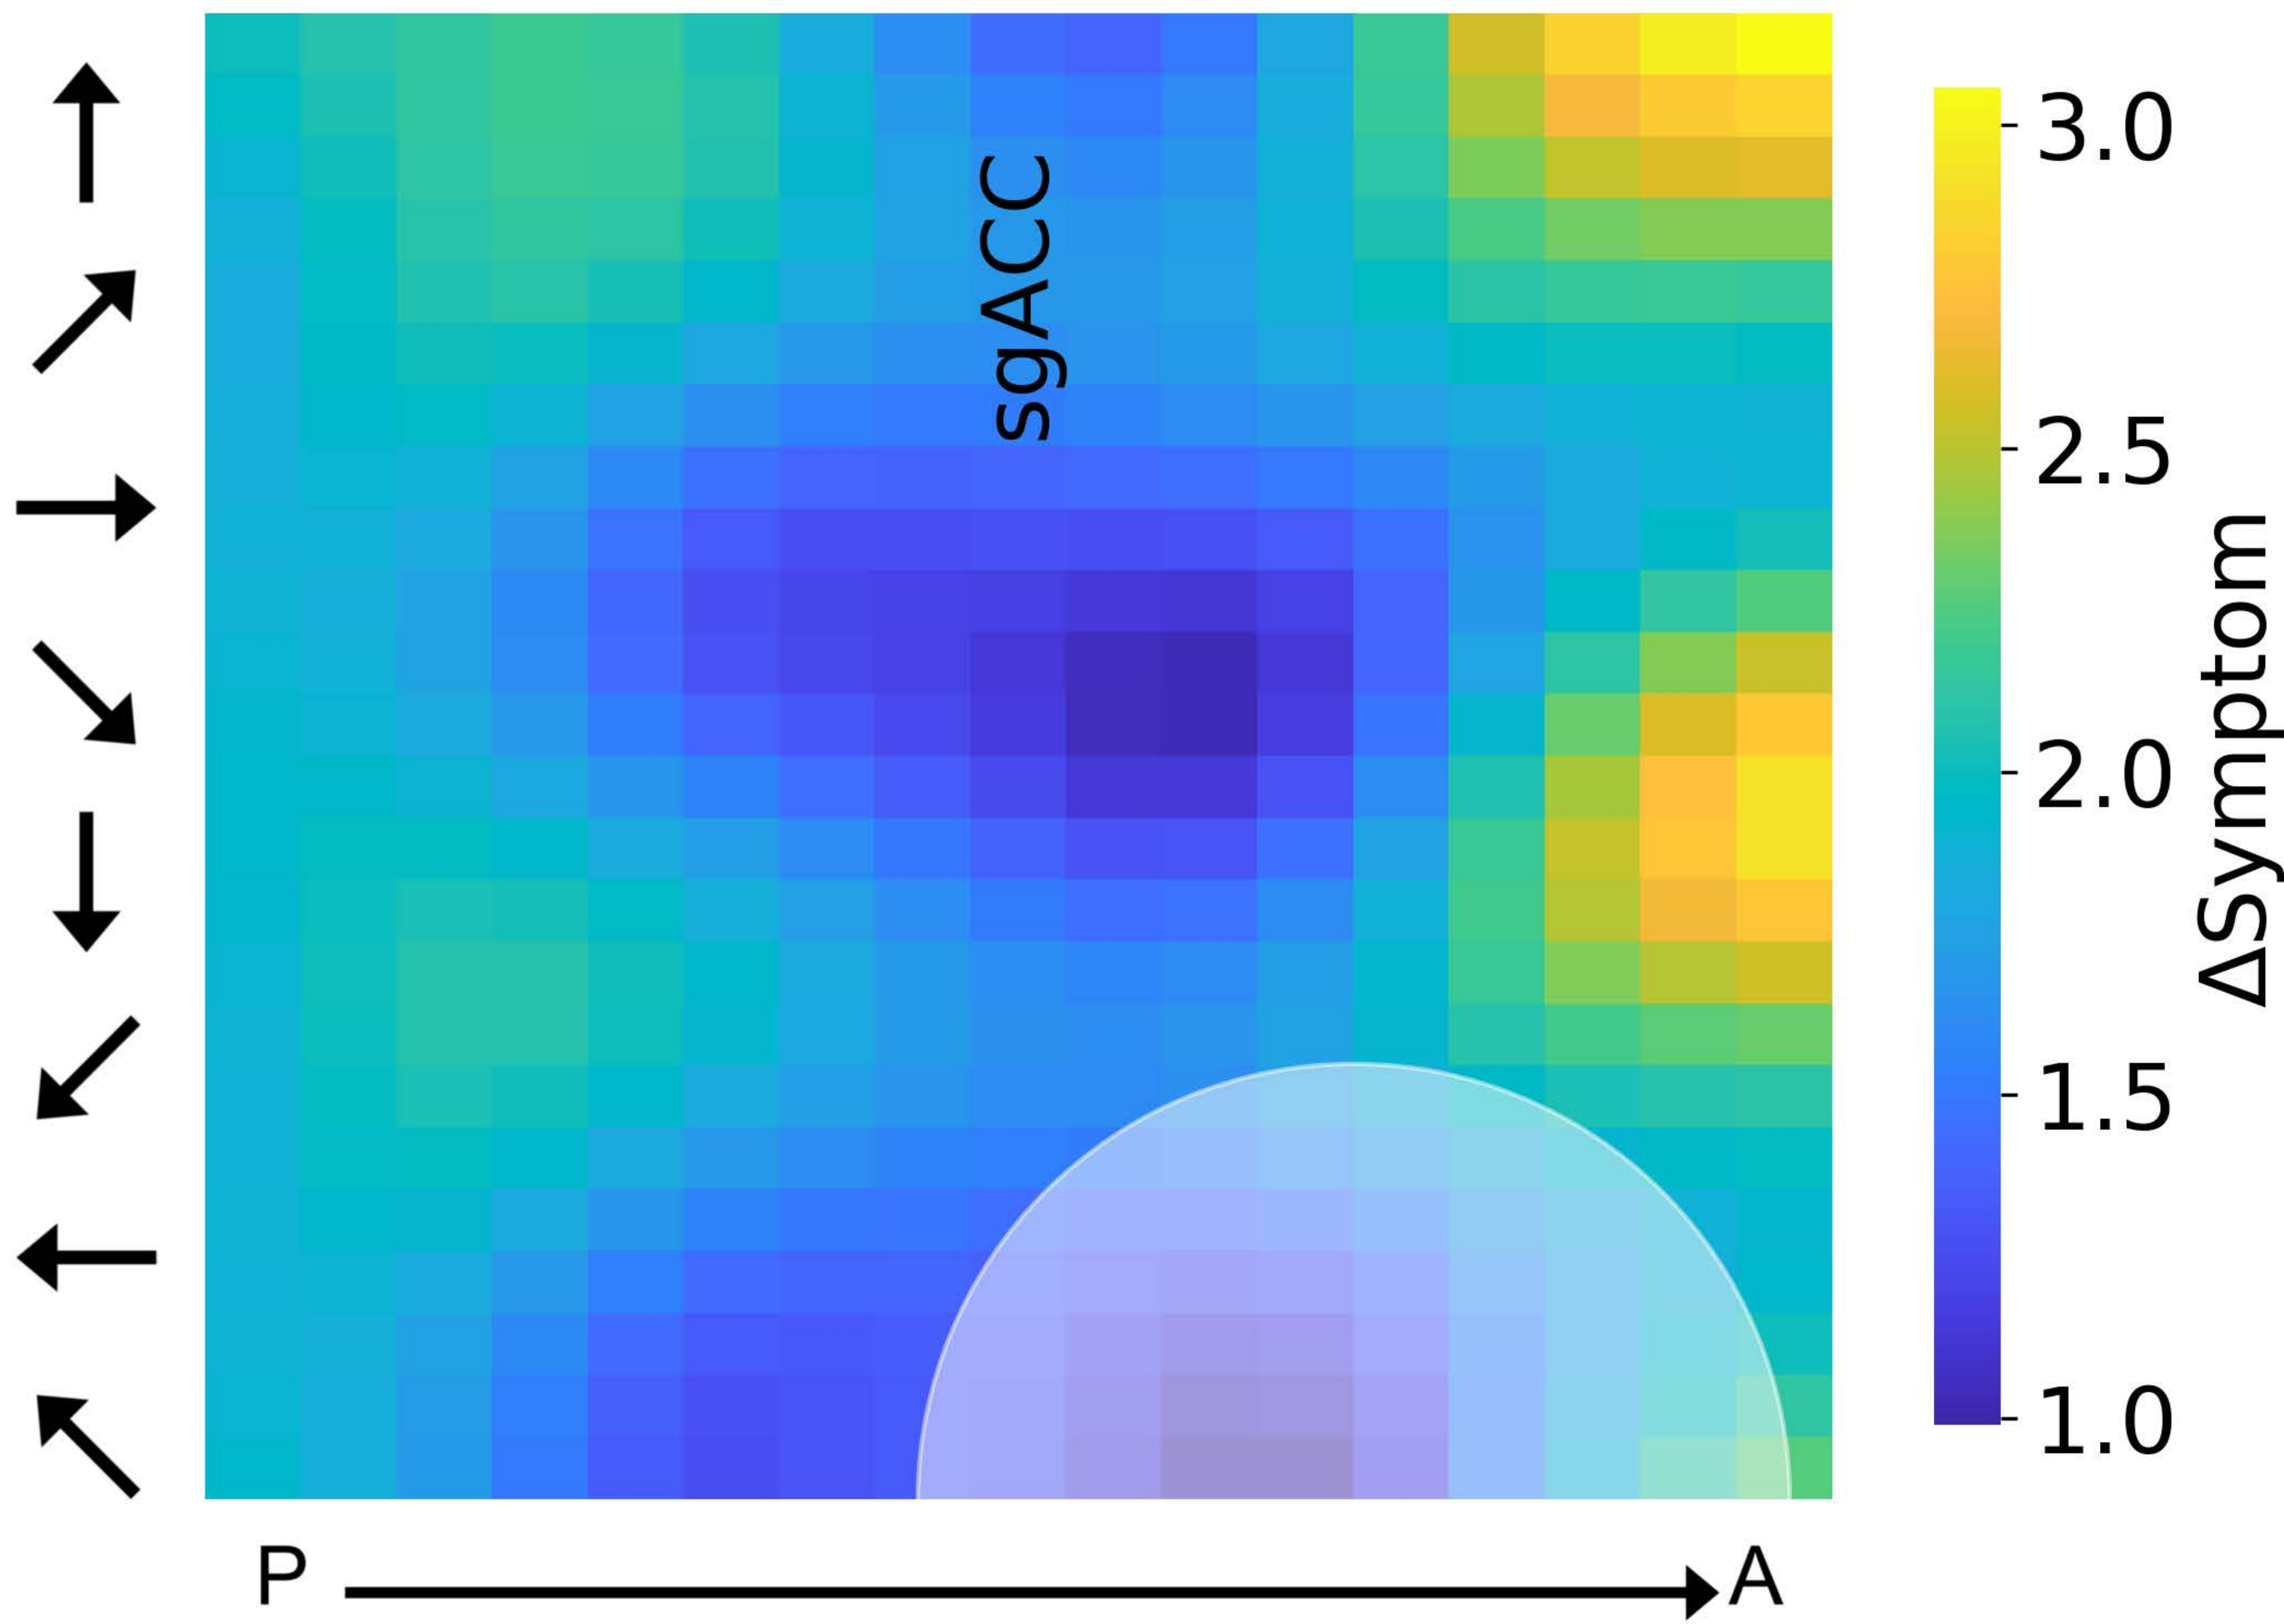



# NDARKM333VX2\_madr\_right\_dlpfc

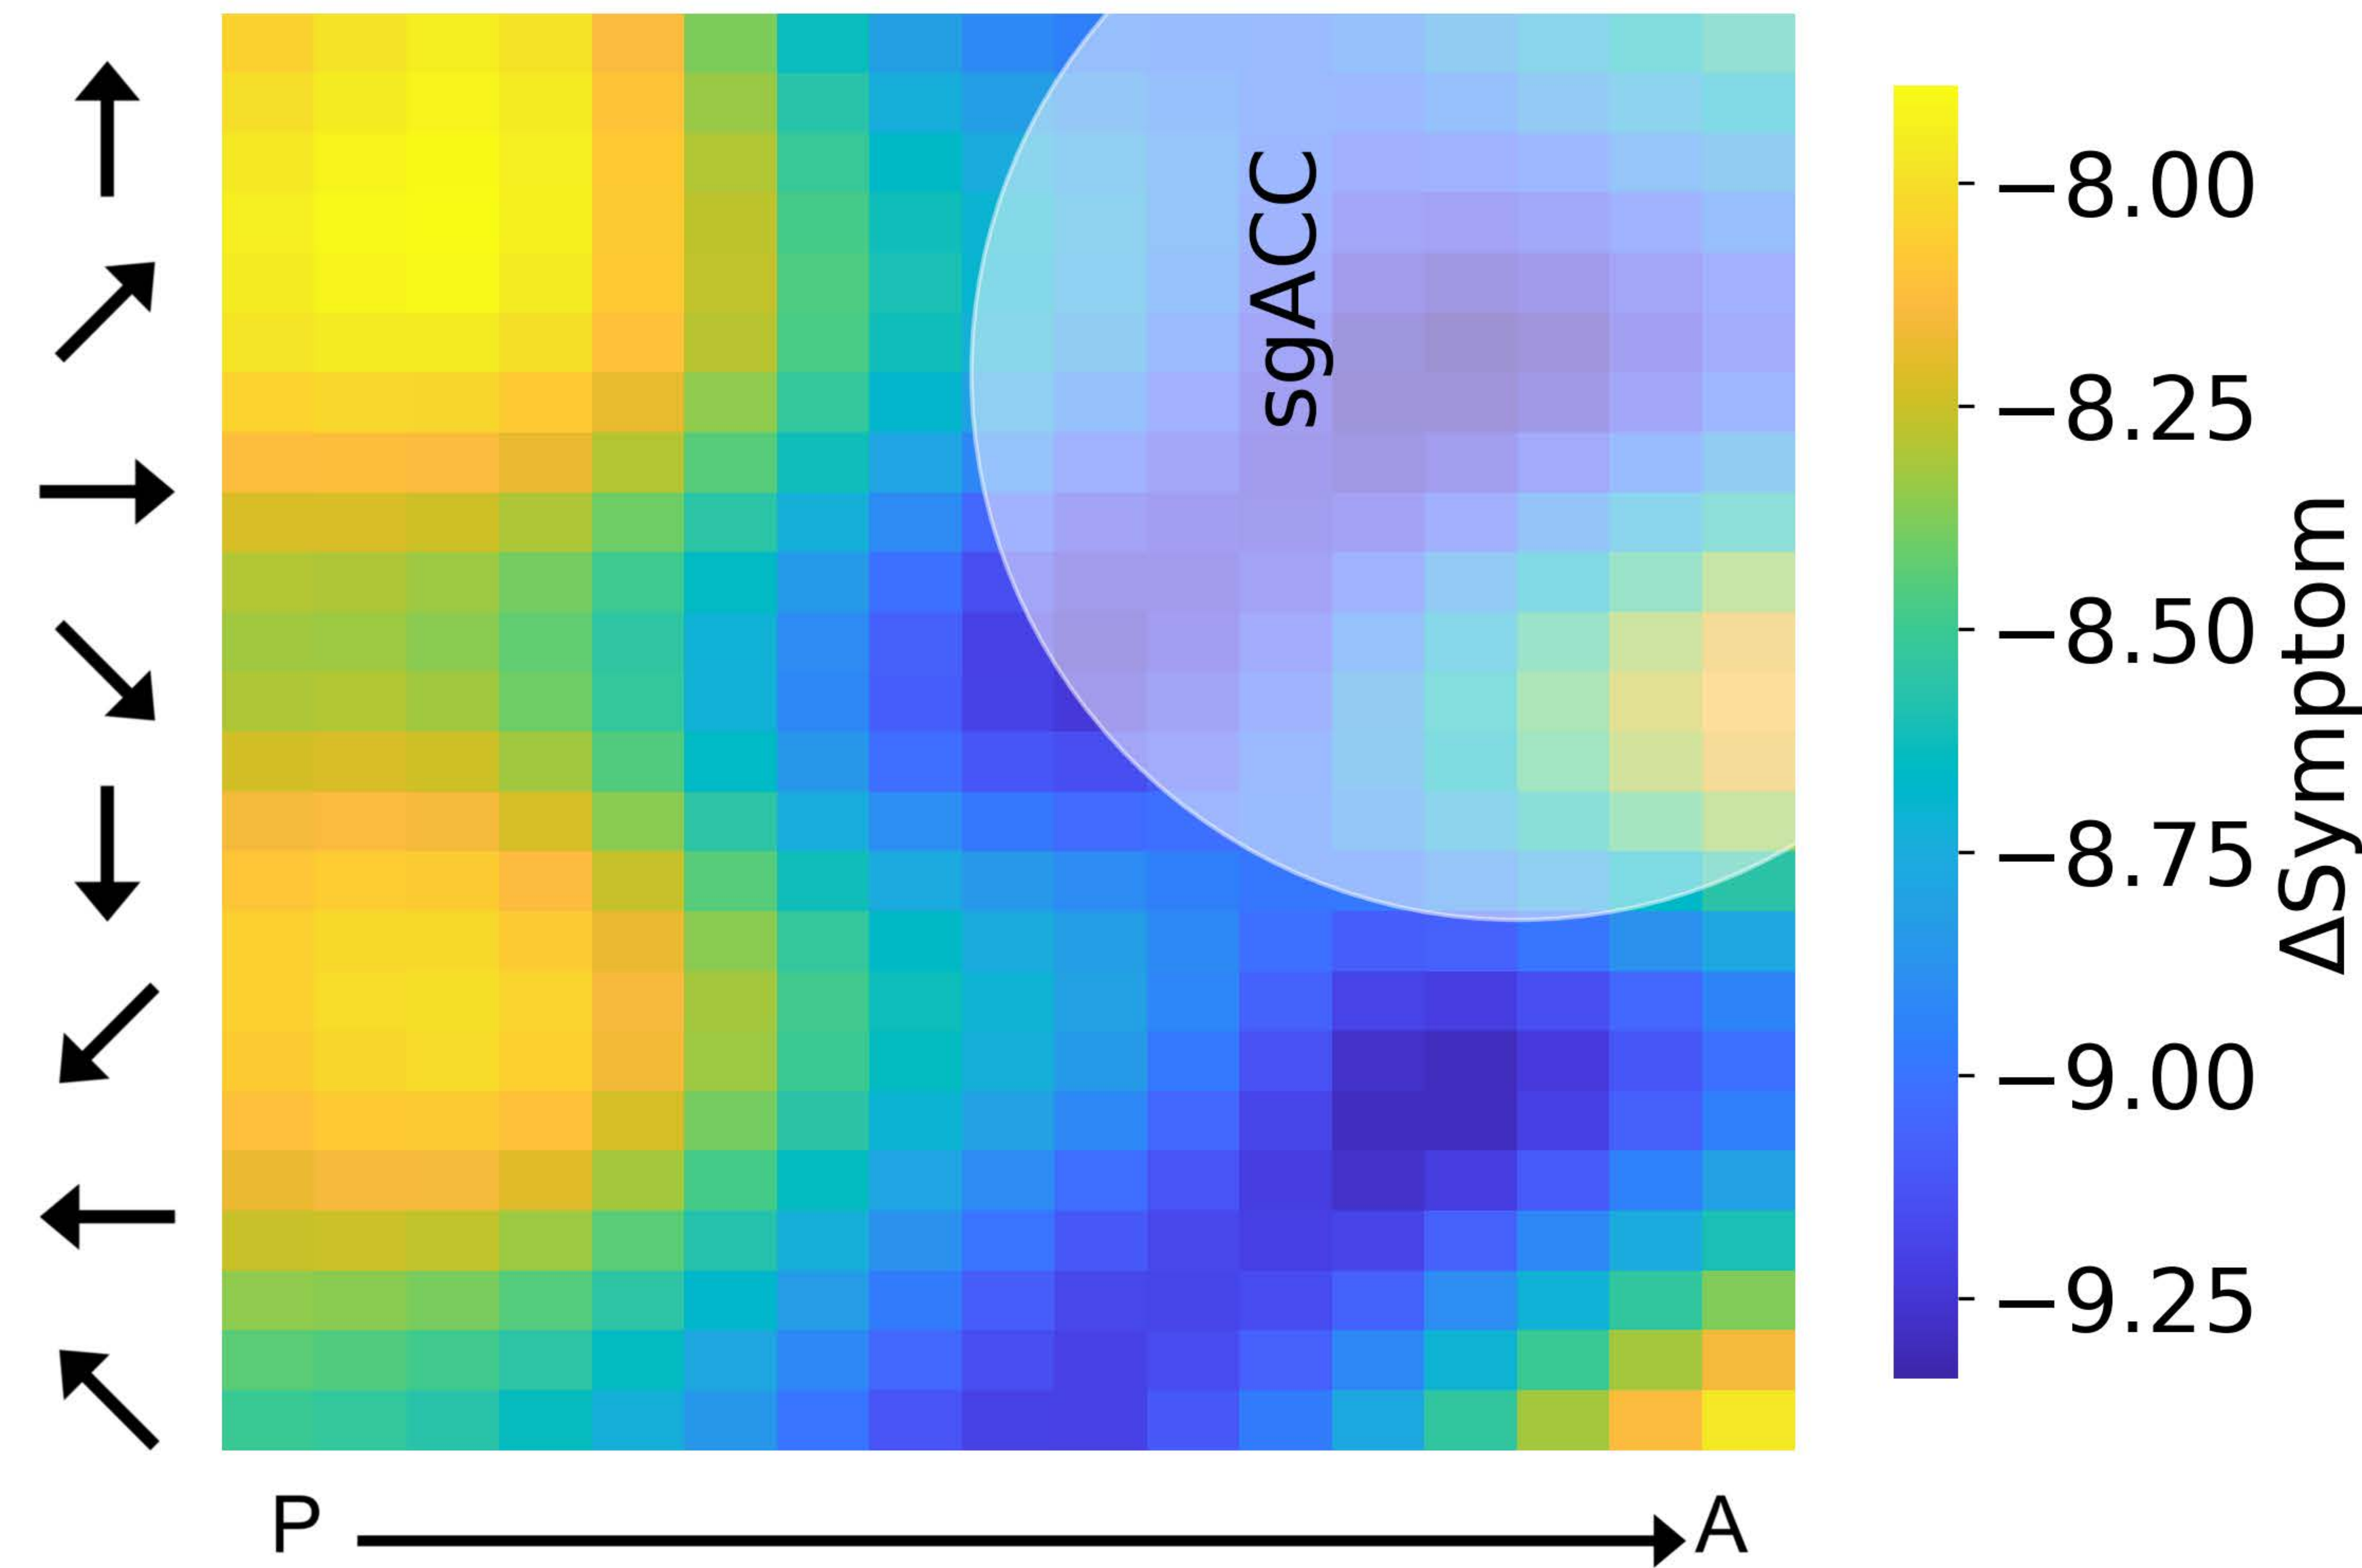



# INDARKT991DUC\_madrs\_right\_dlpfc

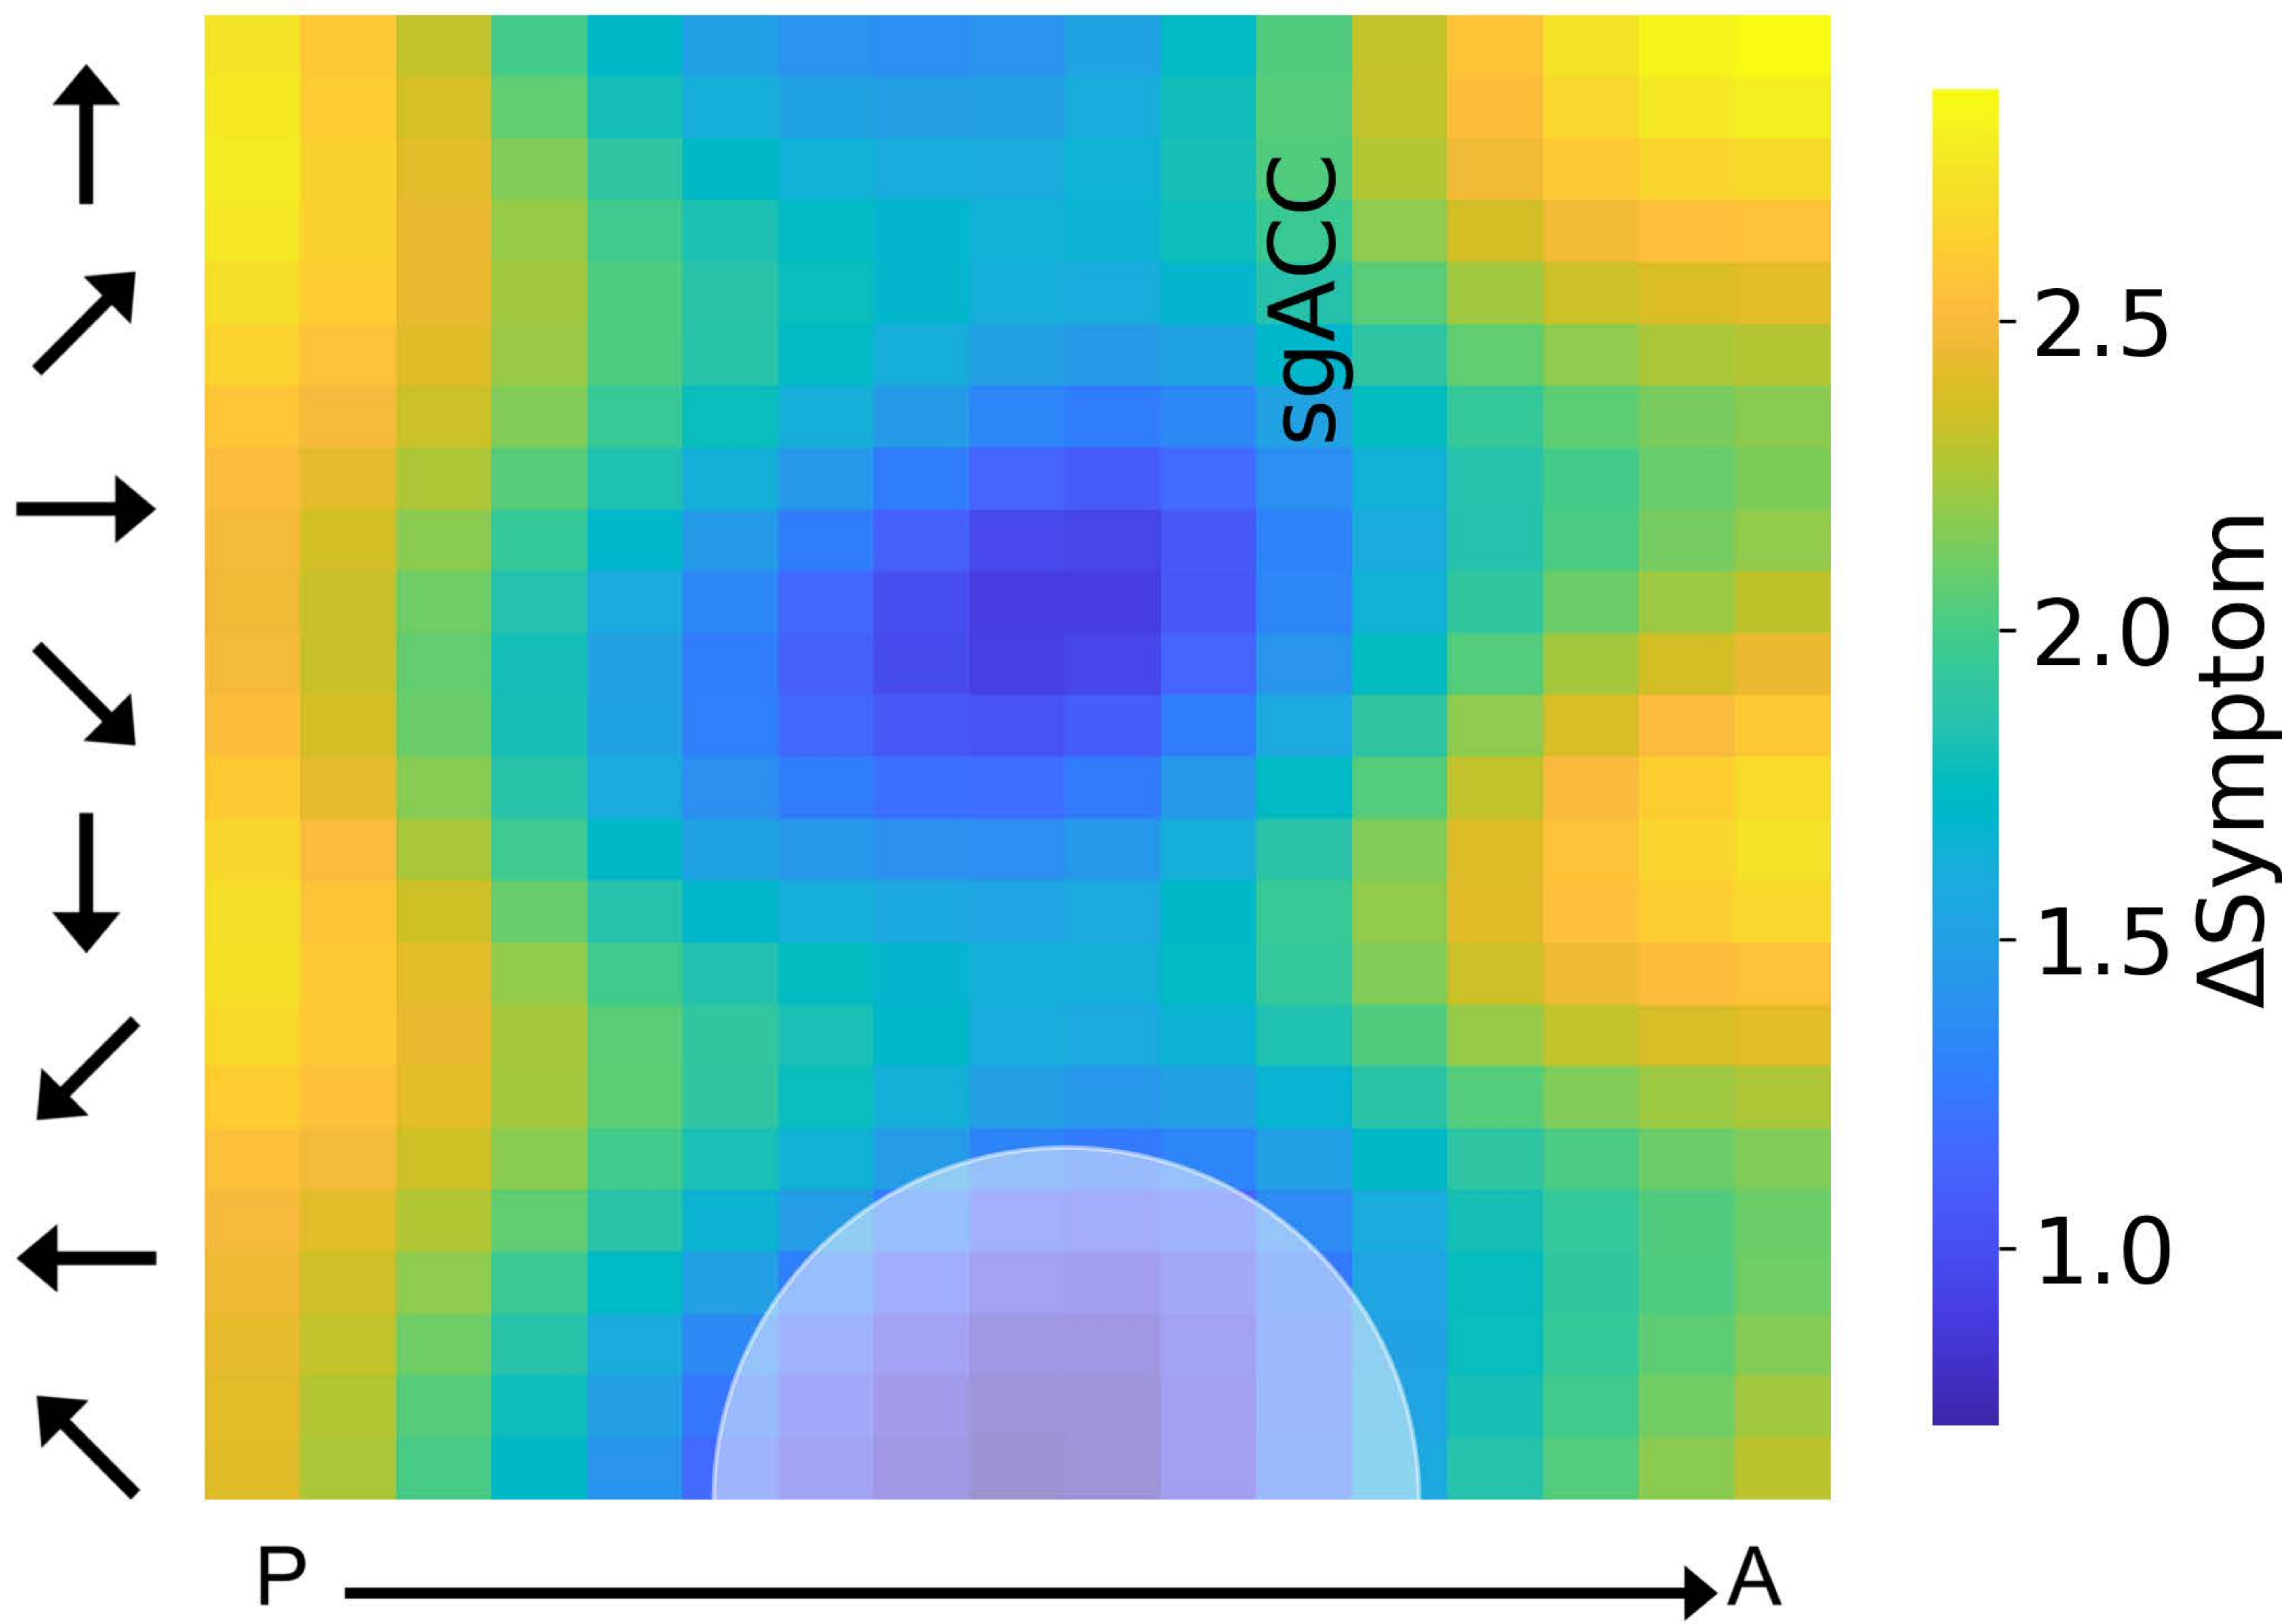



# NDARKU015LTM\_madrs\_right\_dlpfc

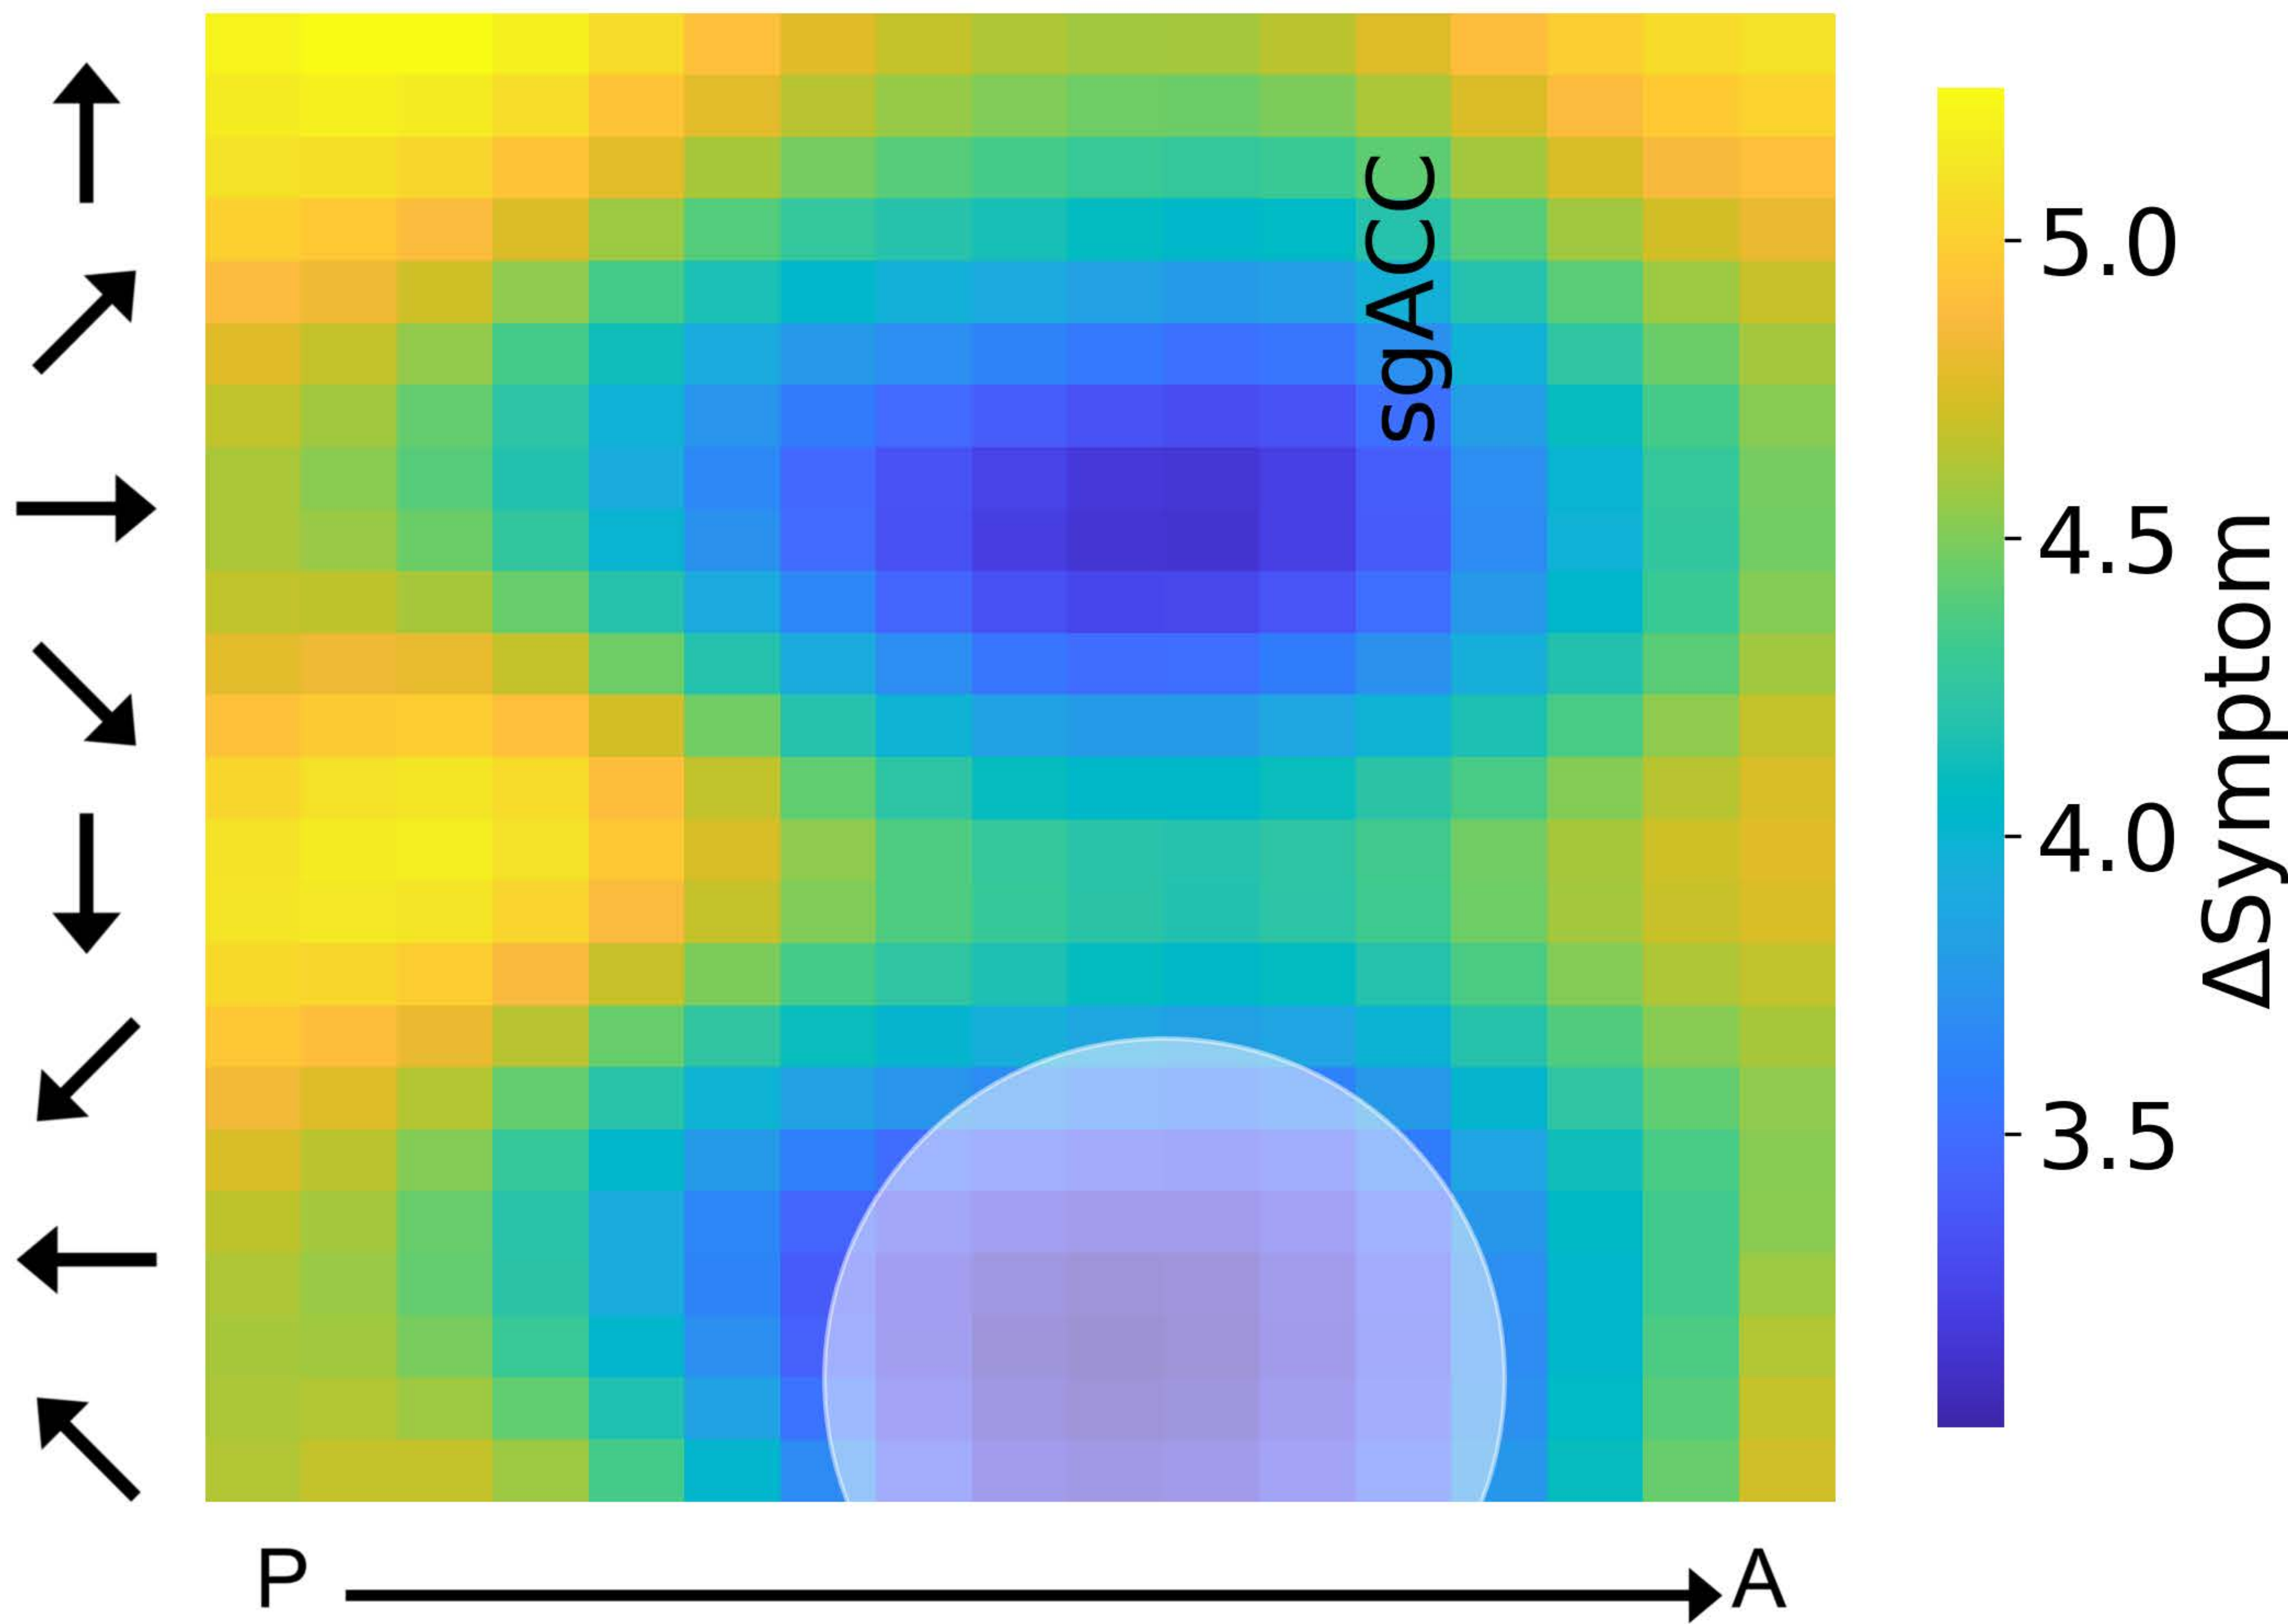



# NDARKV126RTP\_madrs\_right\_dlpfc

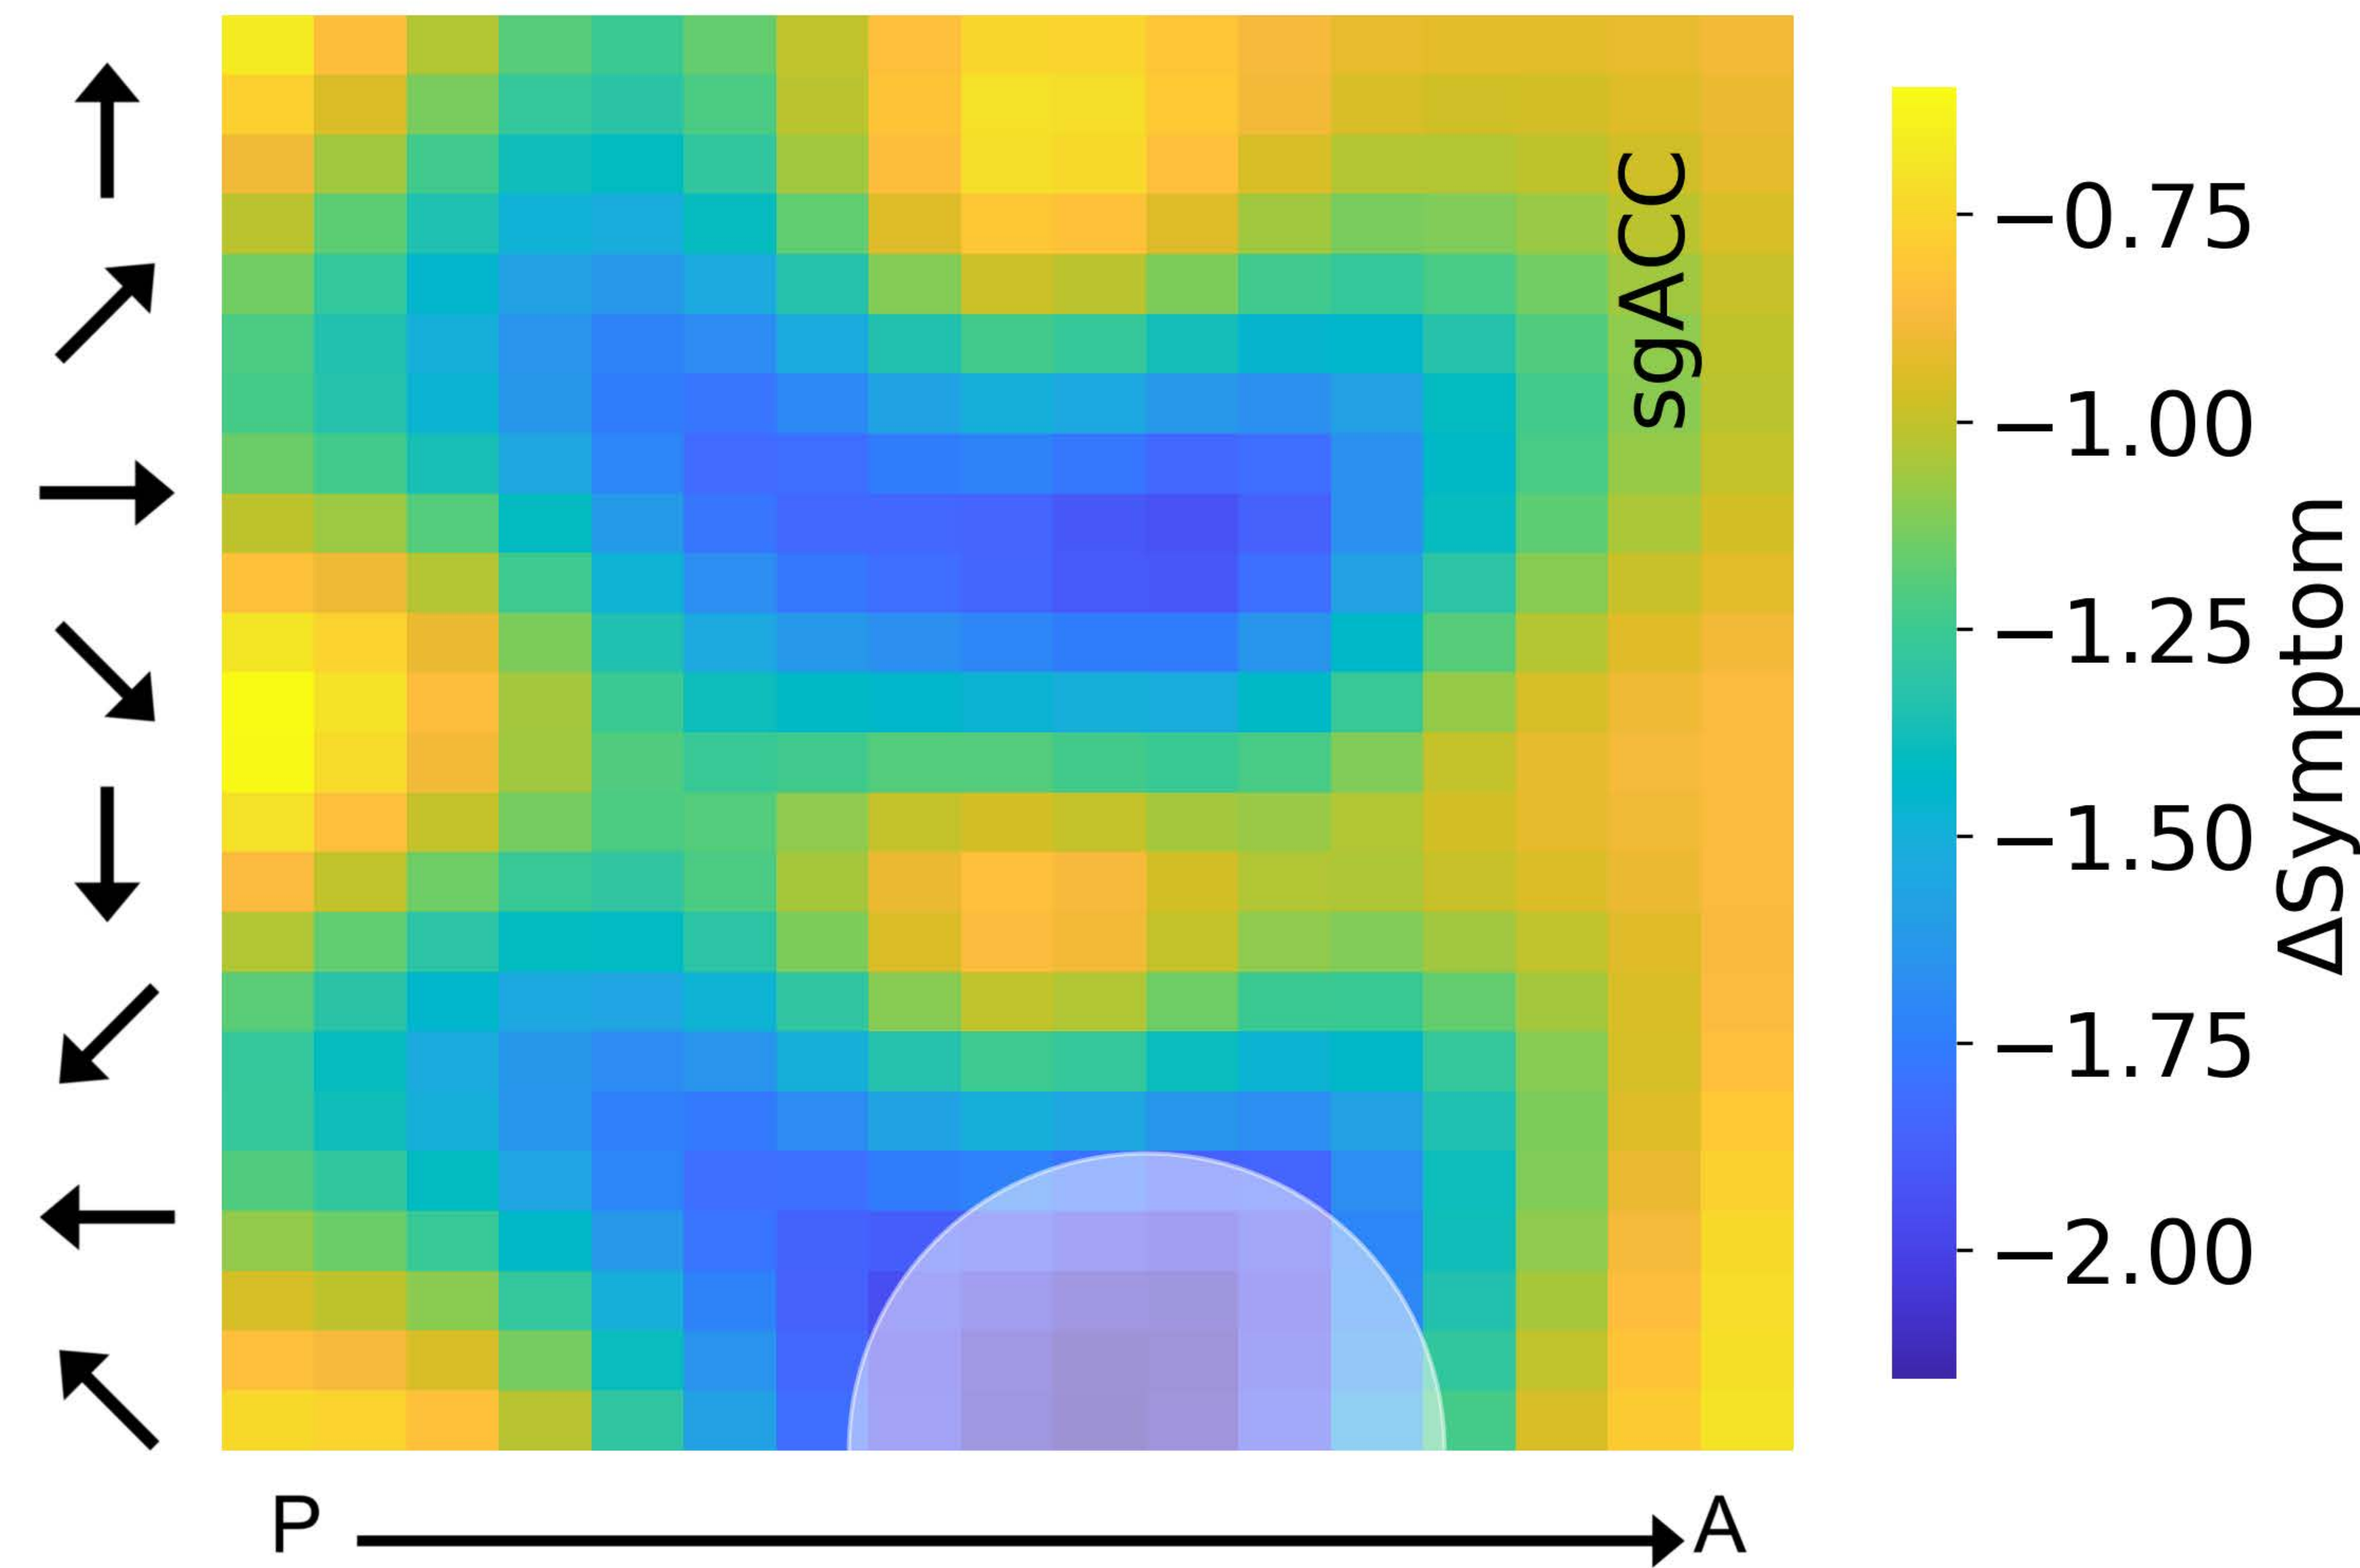



# NDARLF826BAB\_madr\_right\_dlpfc

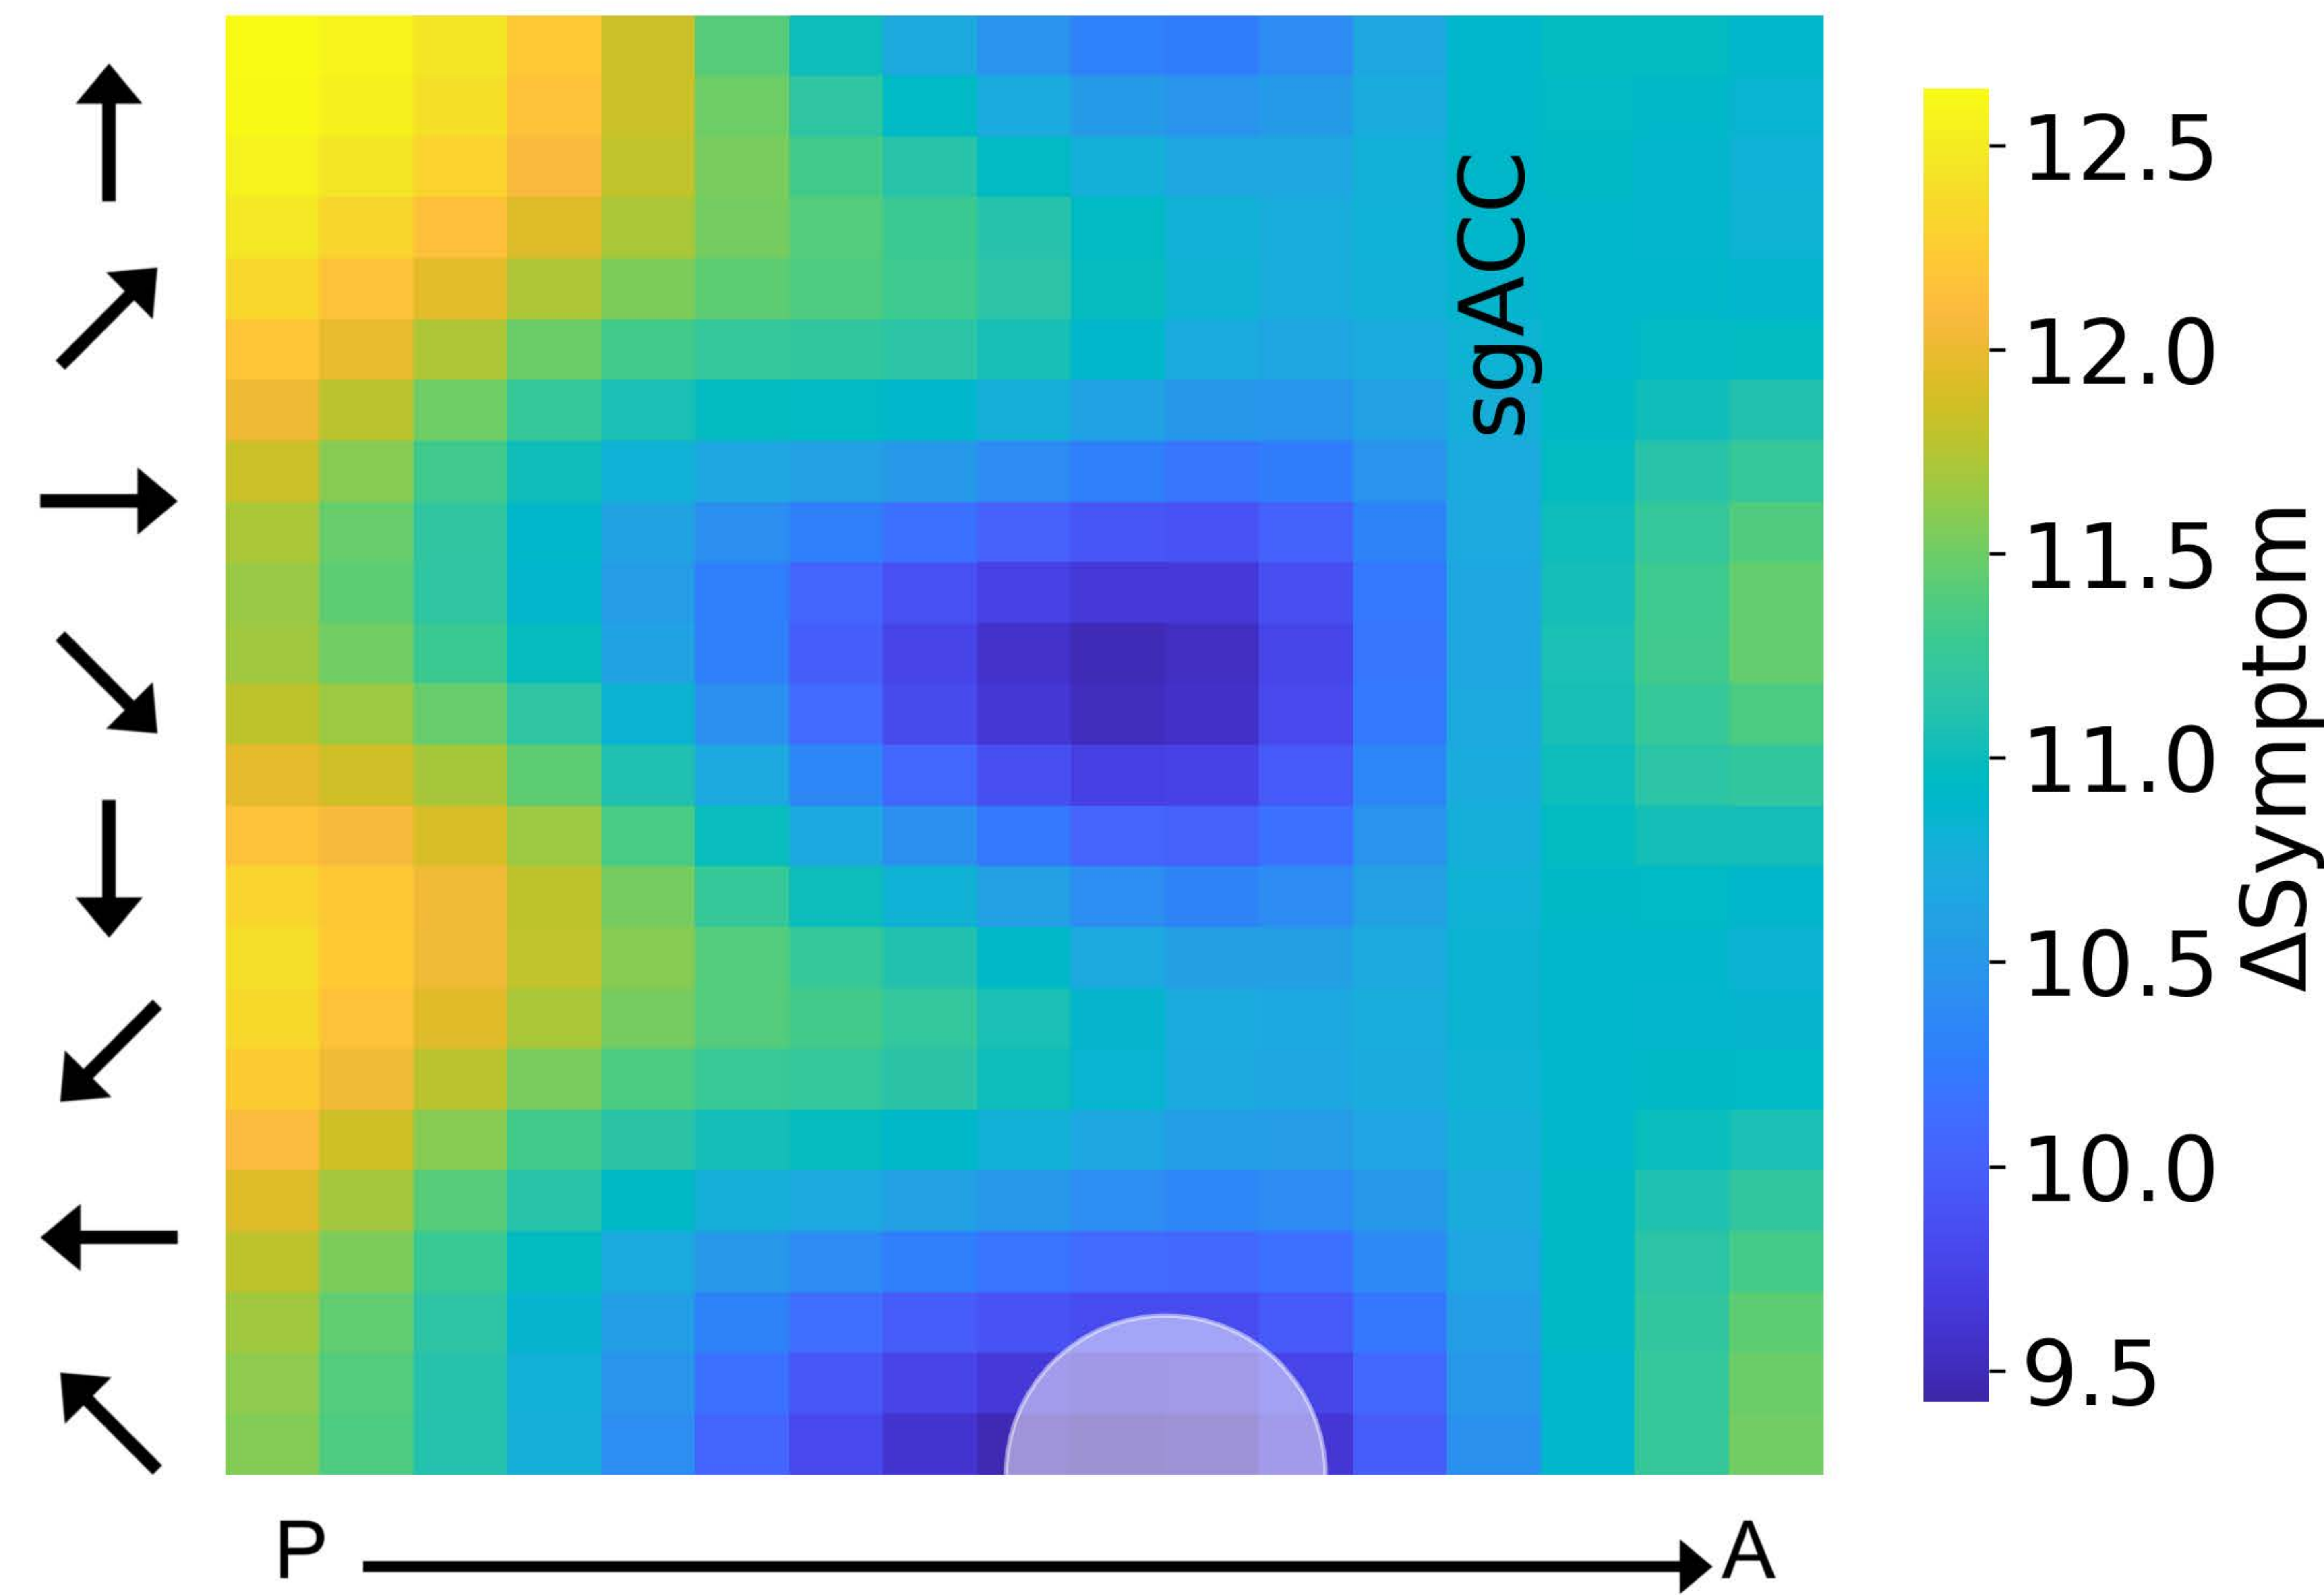



# INDARLM890ELE\_madrs\_right\_dlpfc

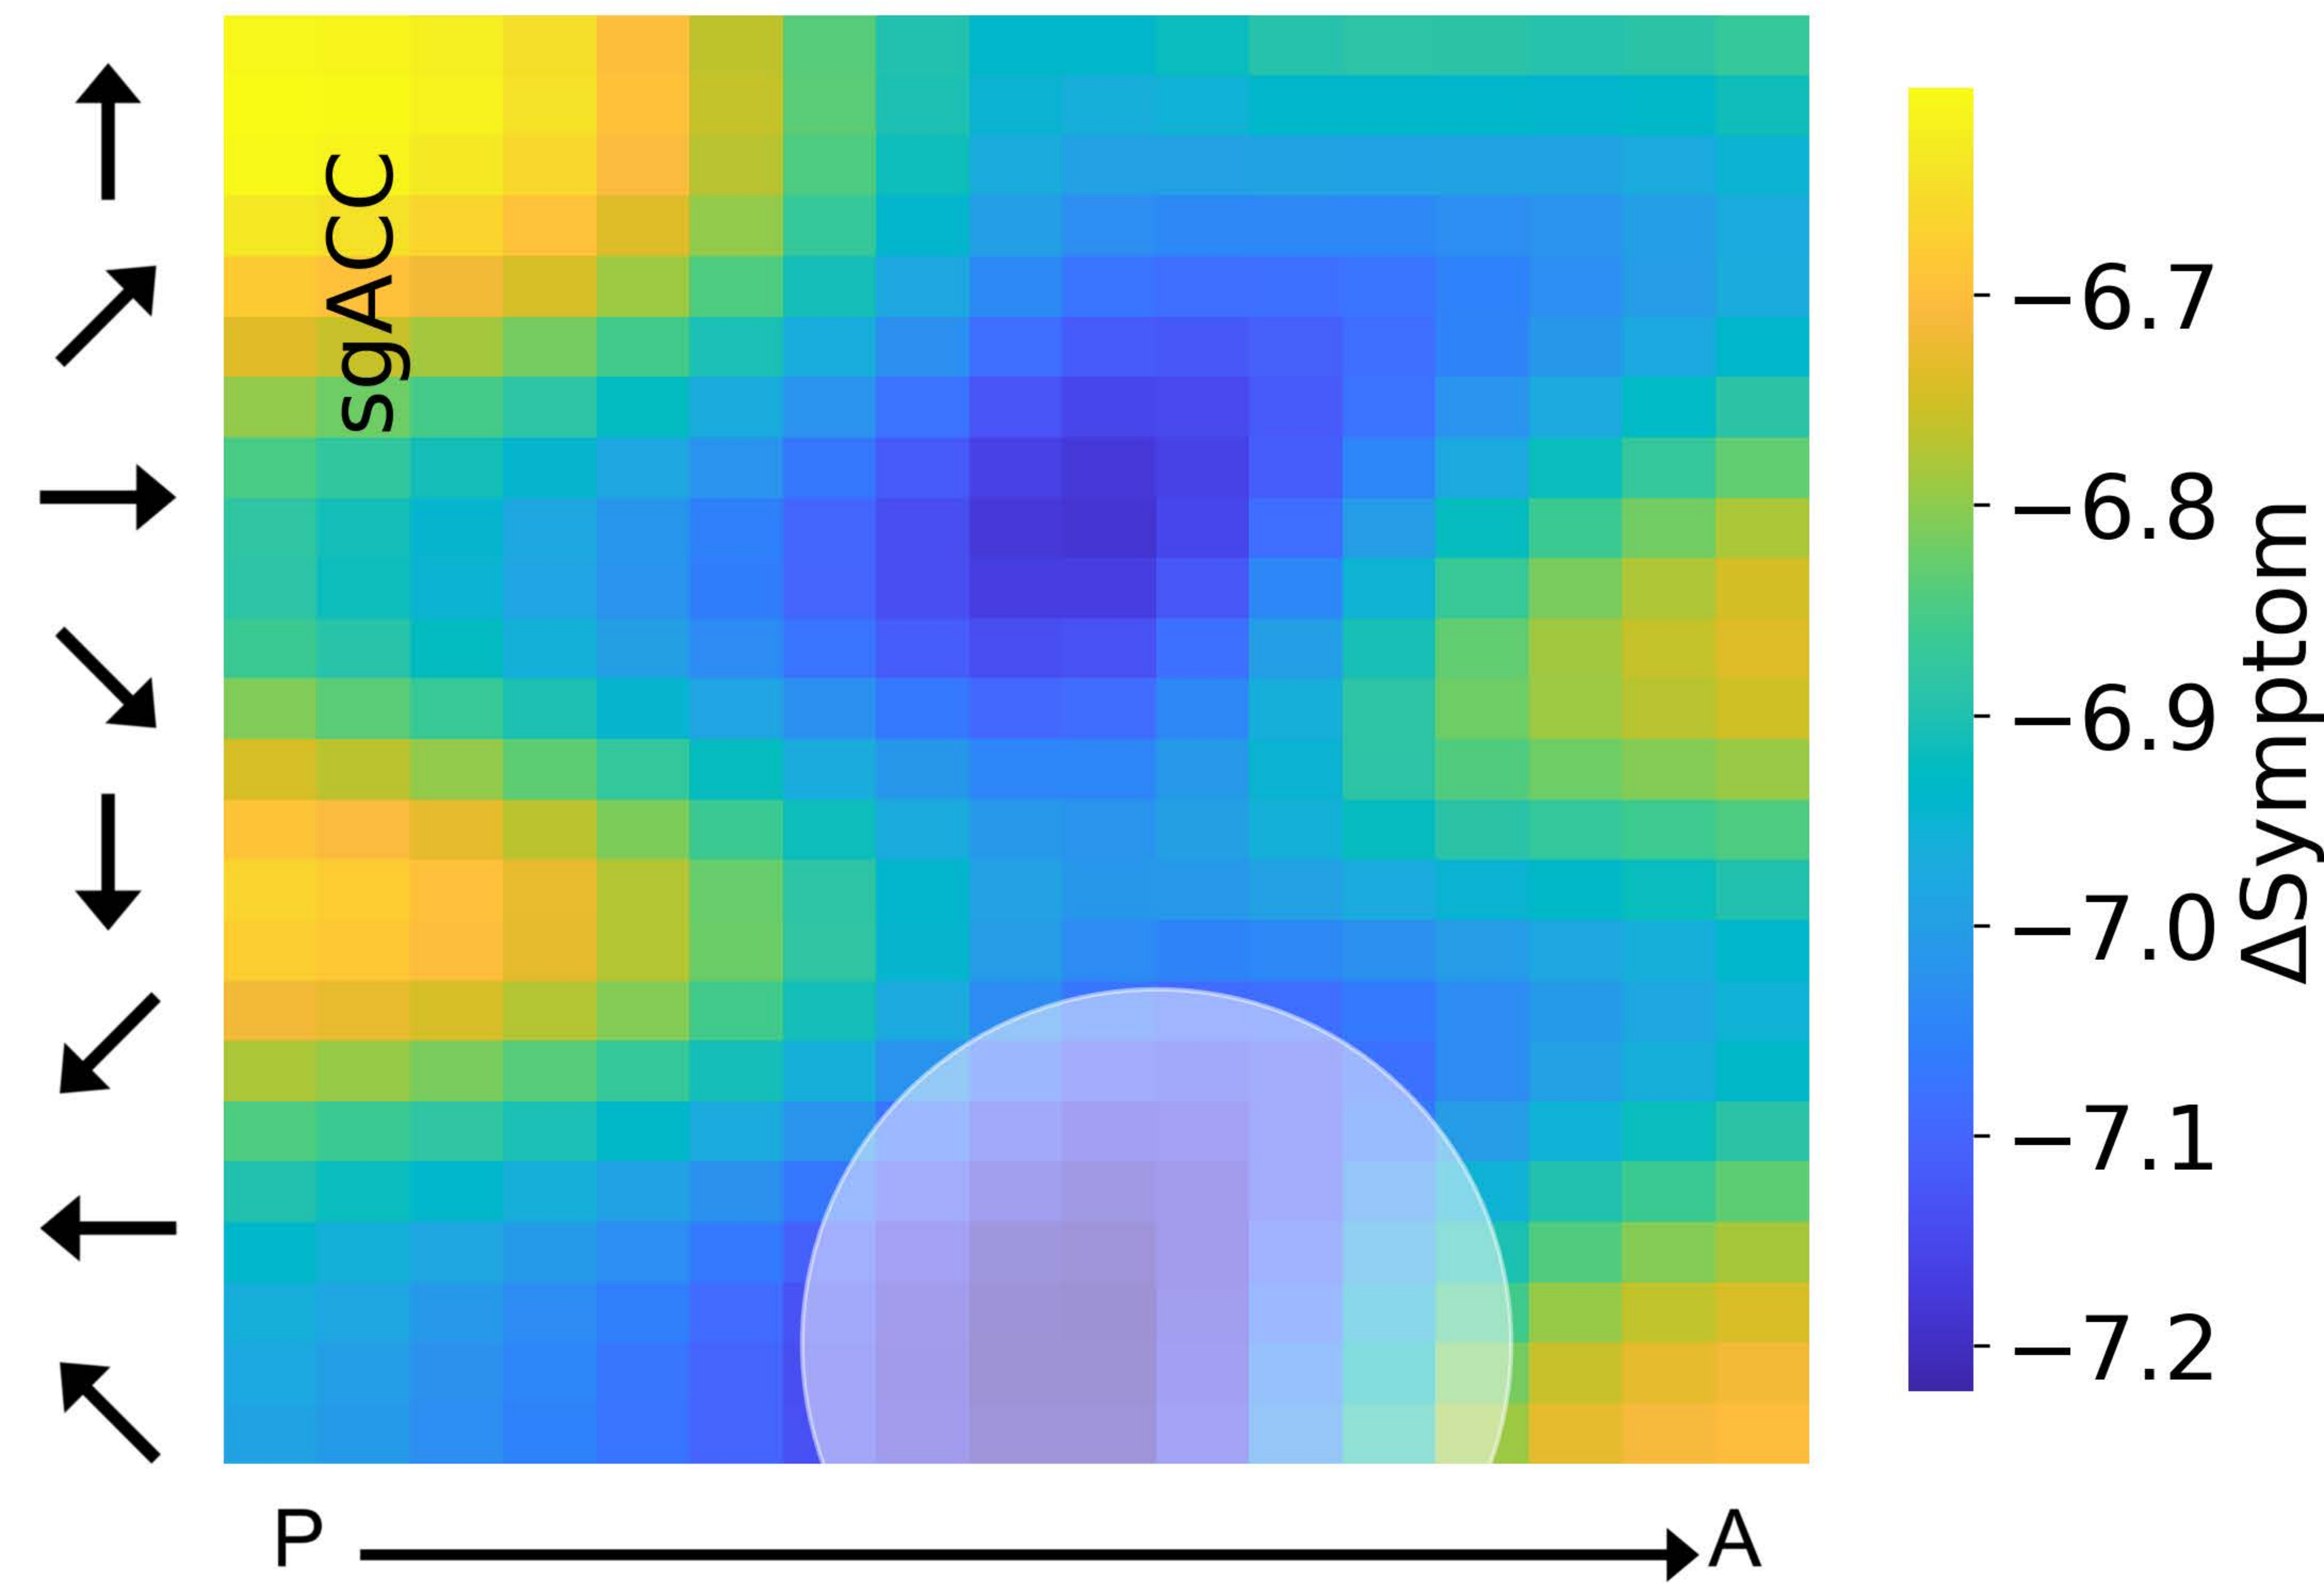



# INDARLZ935EEN\_madrs\_right\_dlpfc

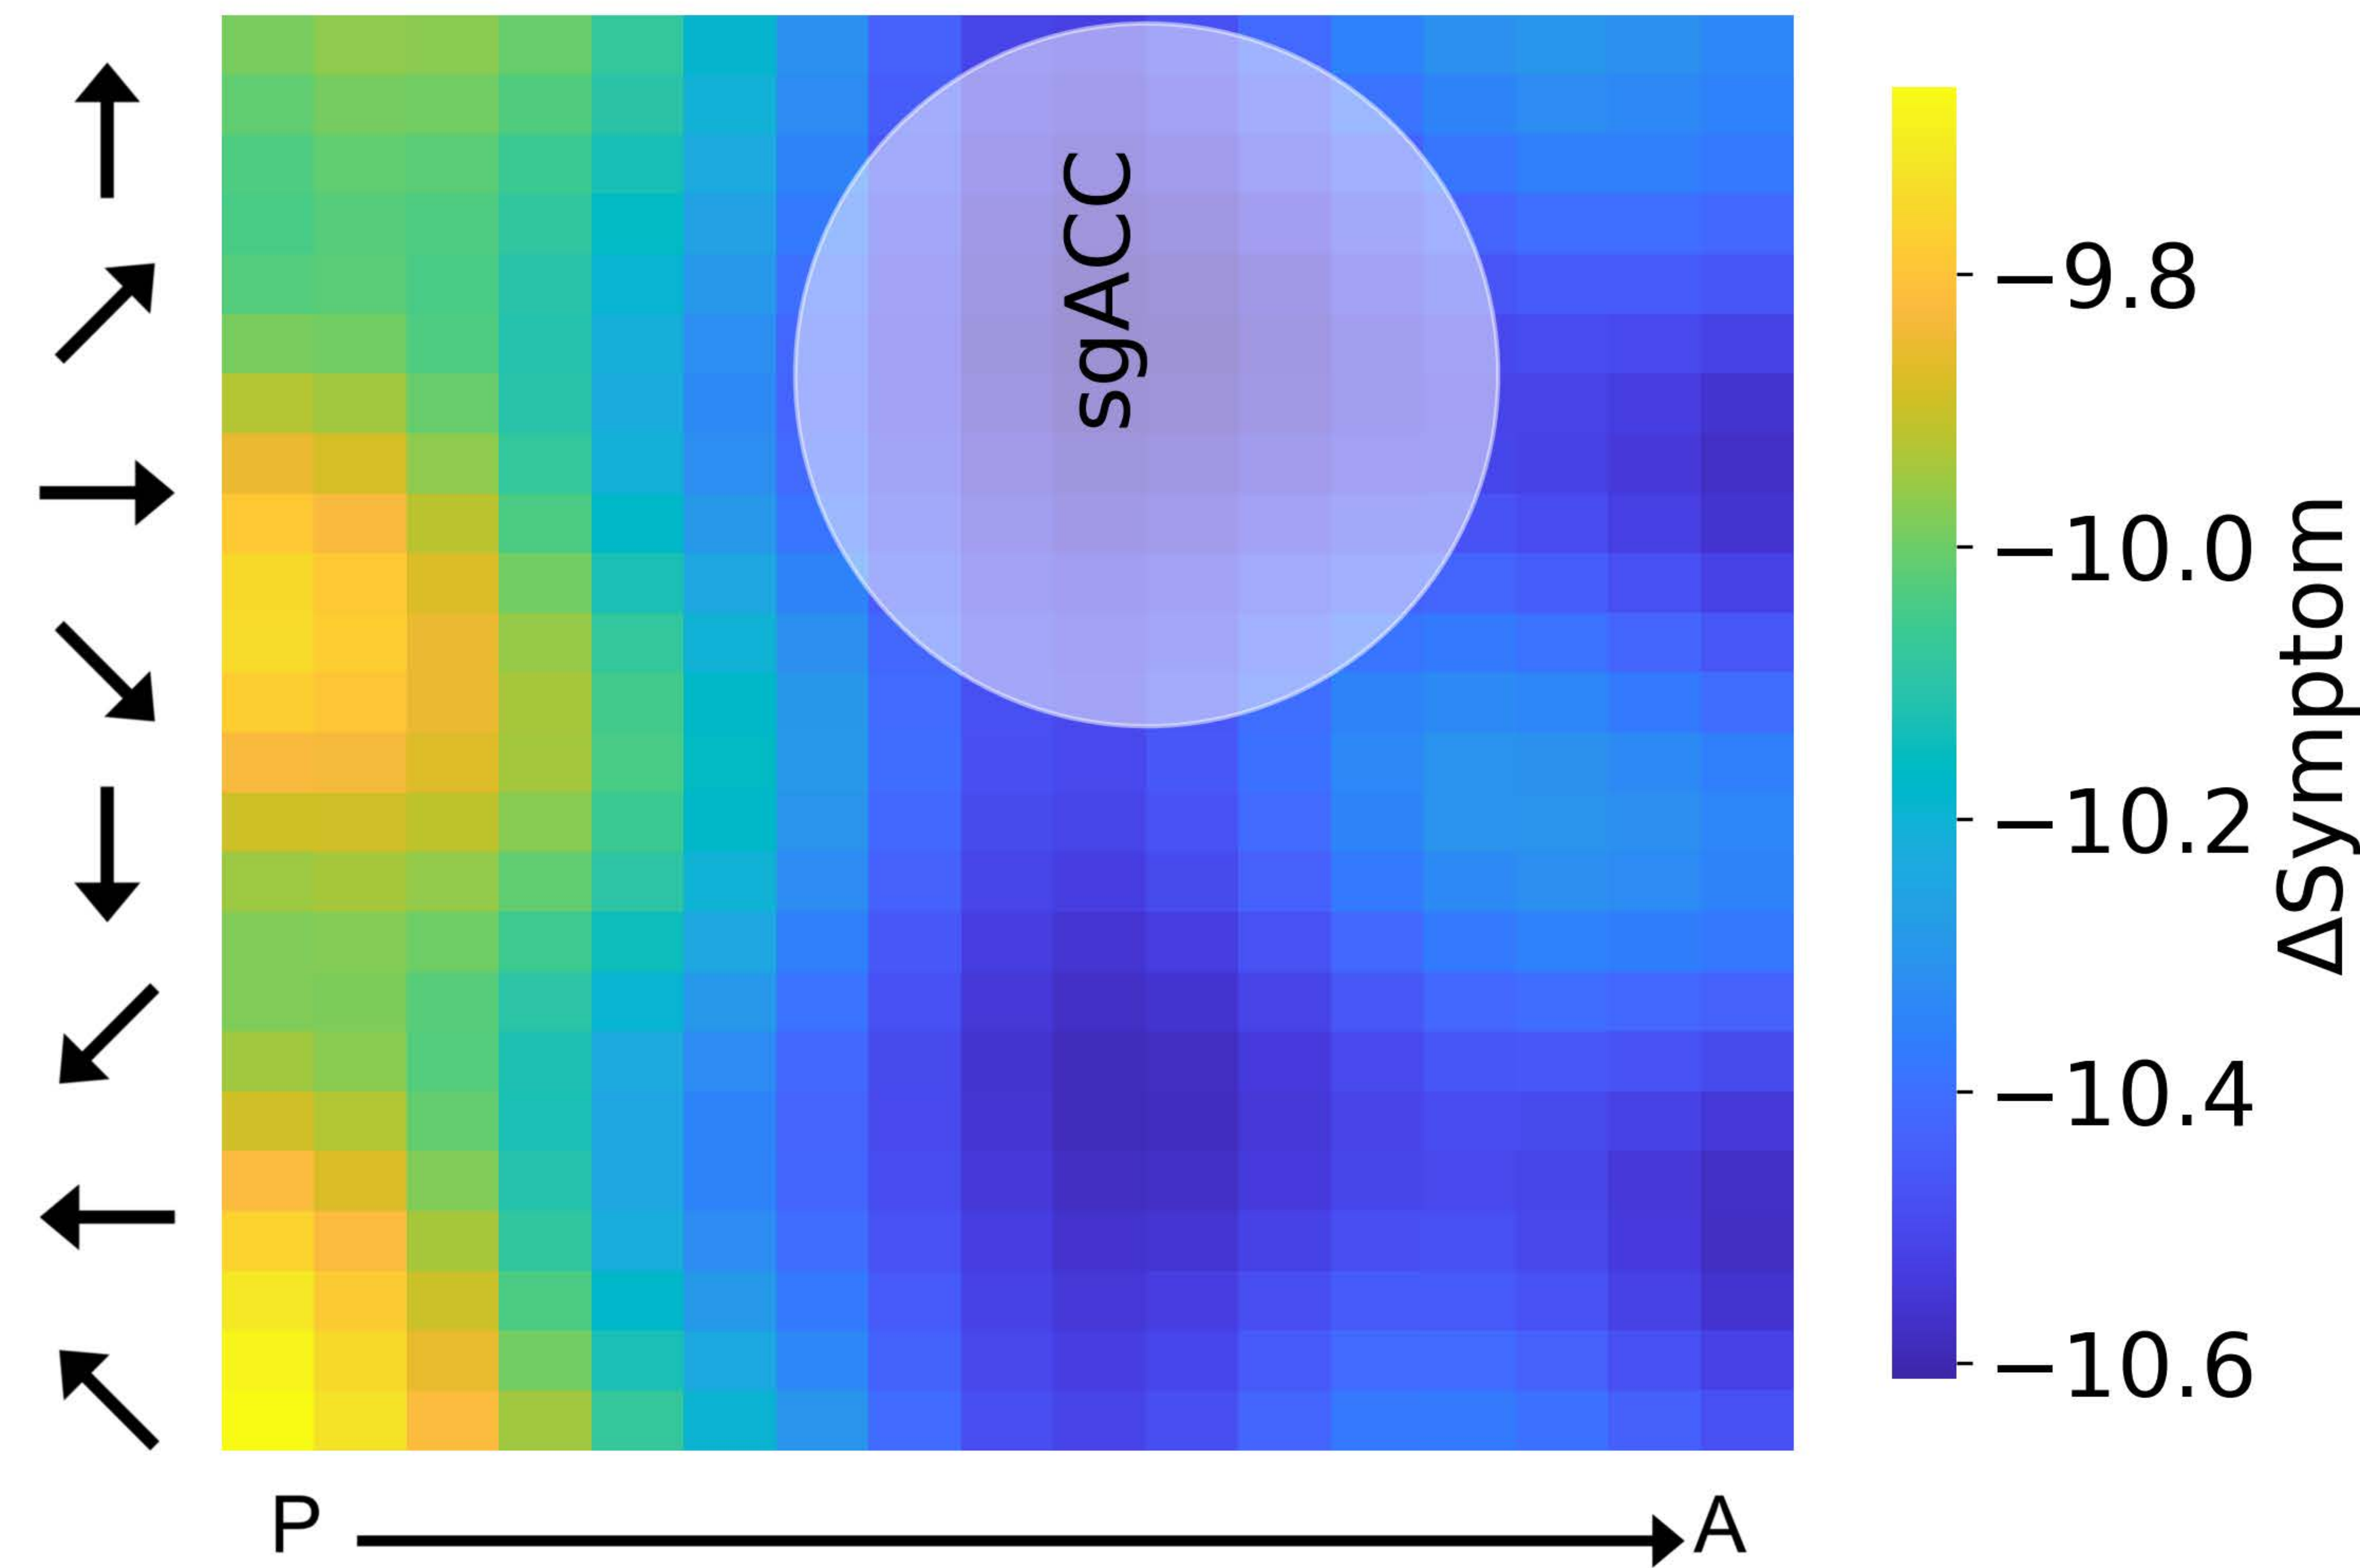



# NDARMA155ATG\_madrs\_right\_dlpfc

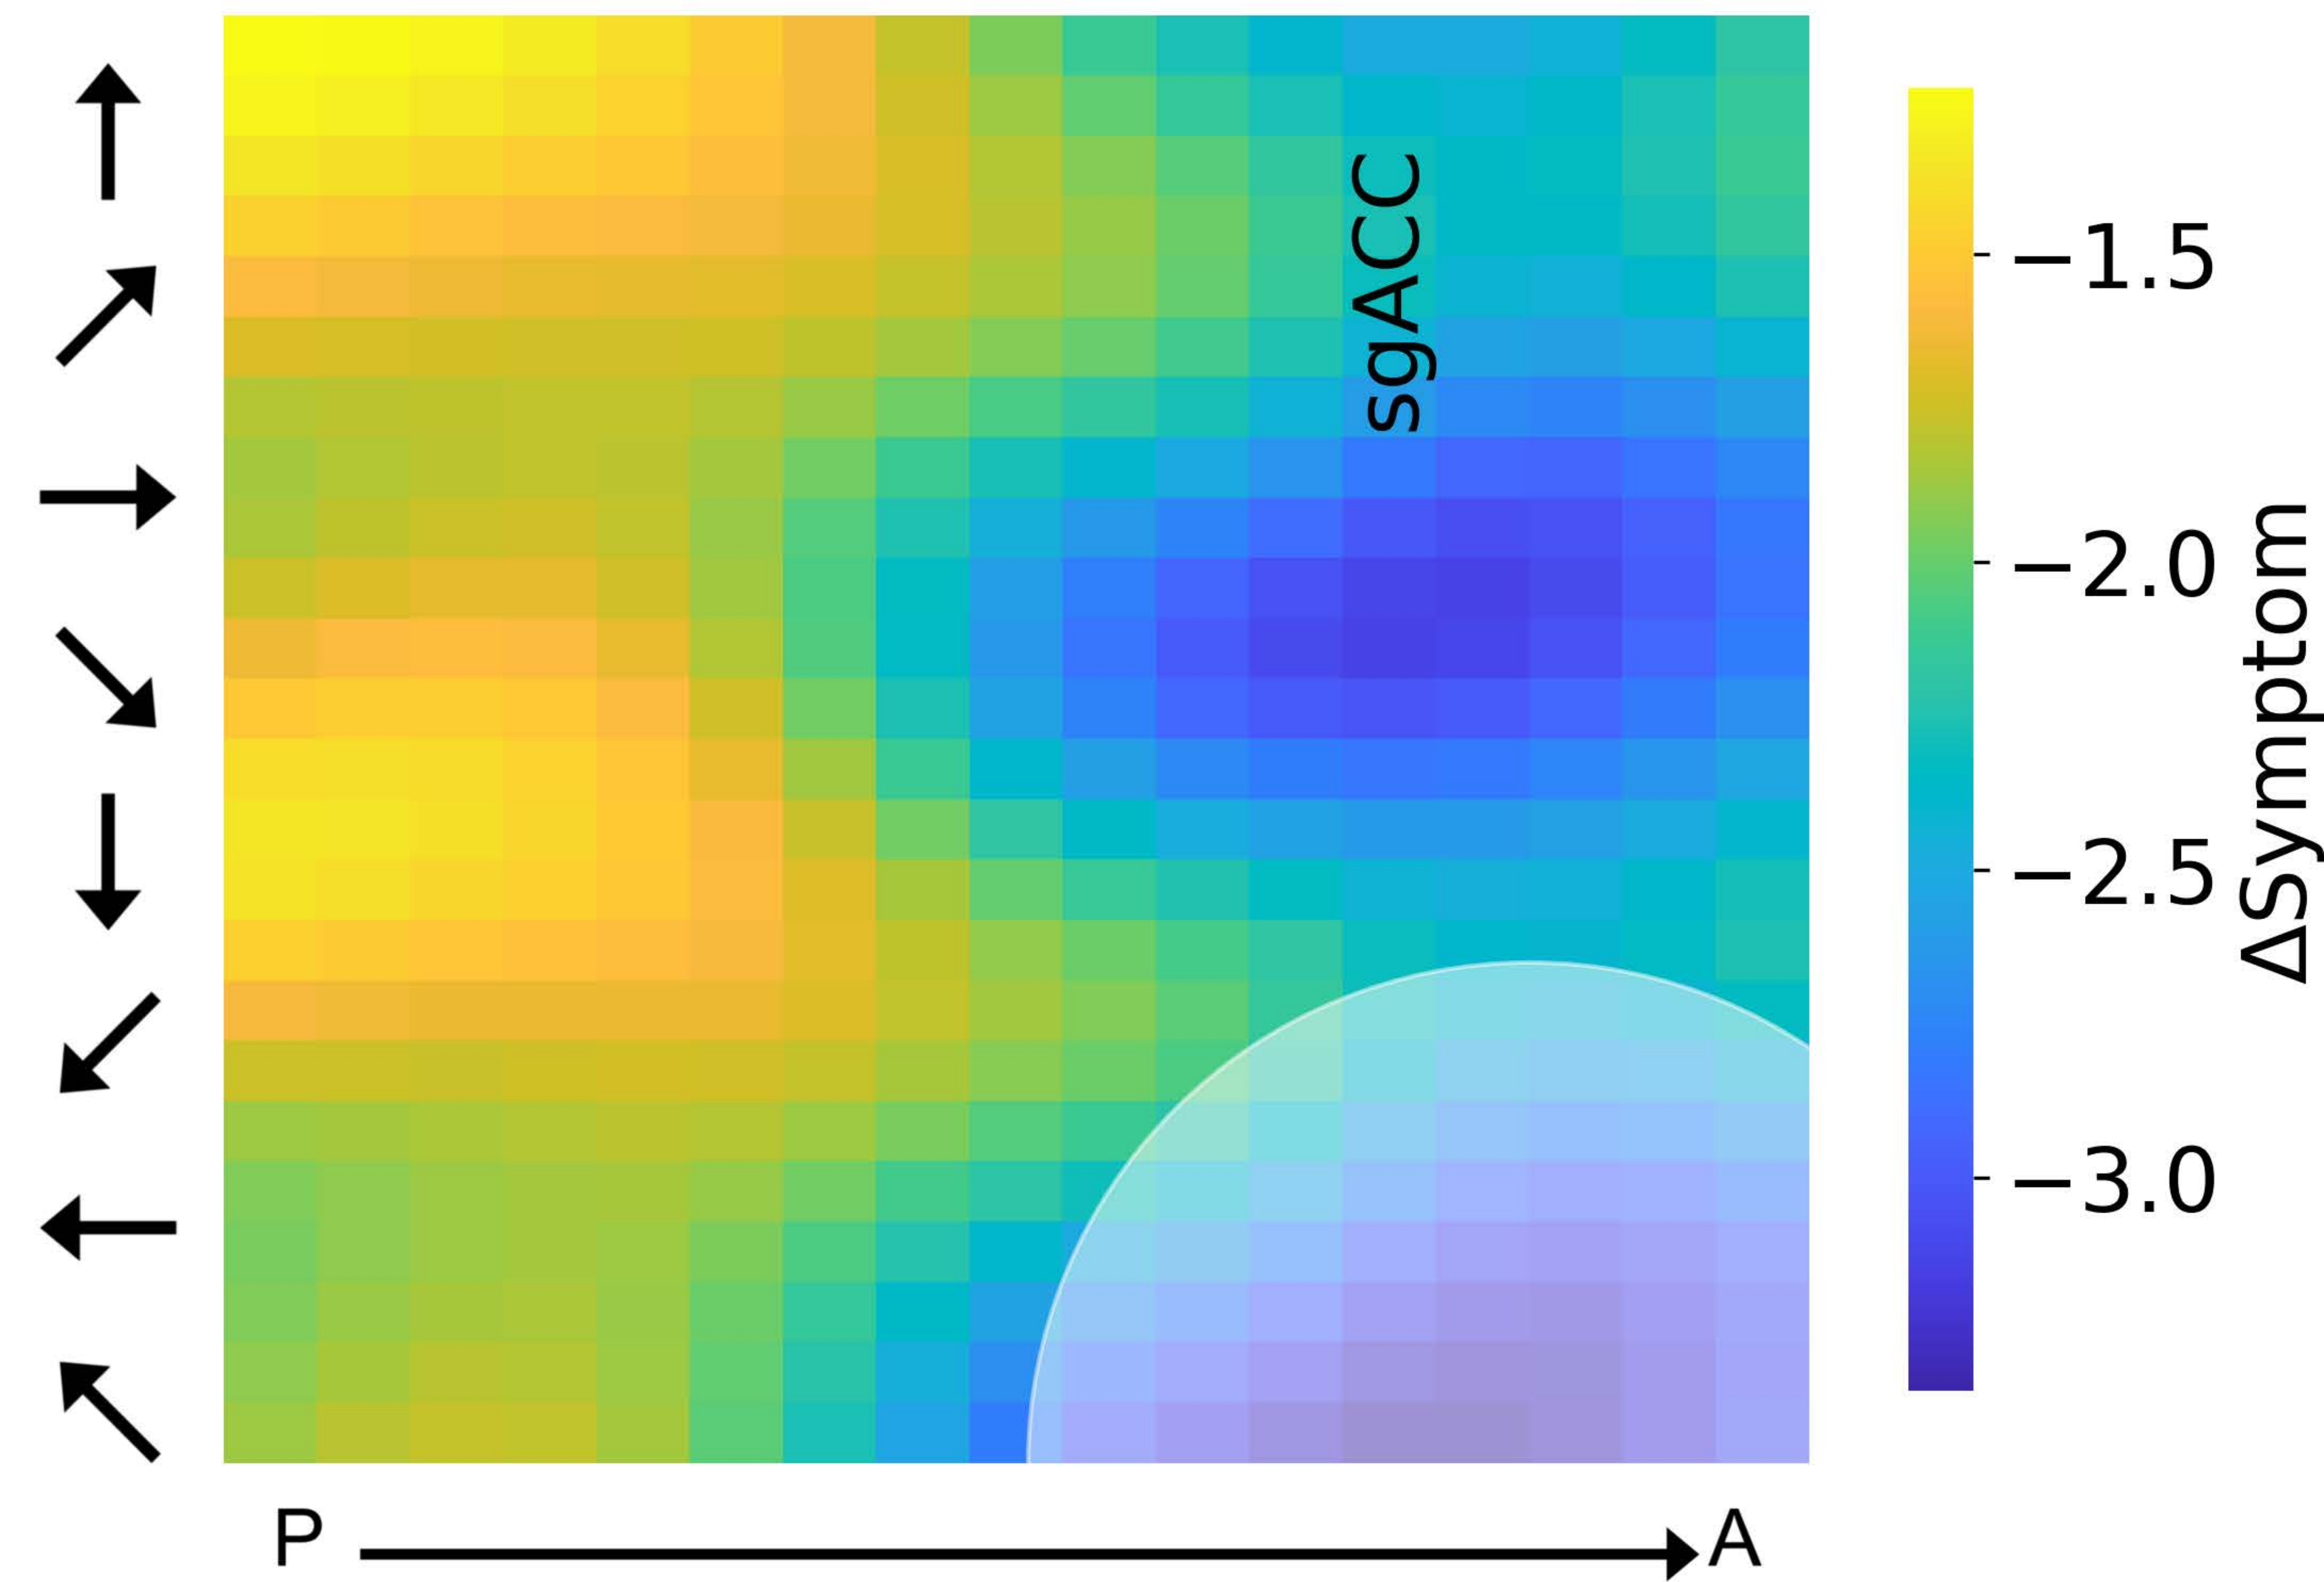



# NDARMB943VPJ\_madrs\_right\_dlpfc

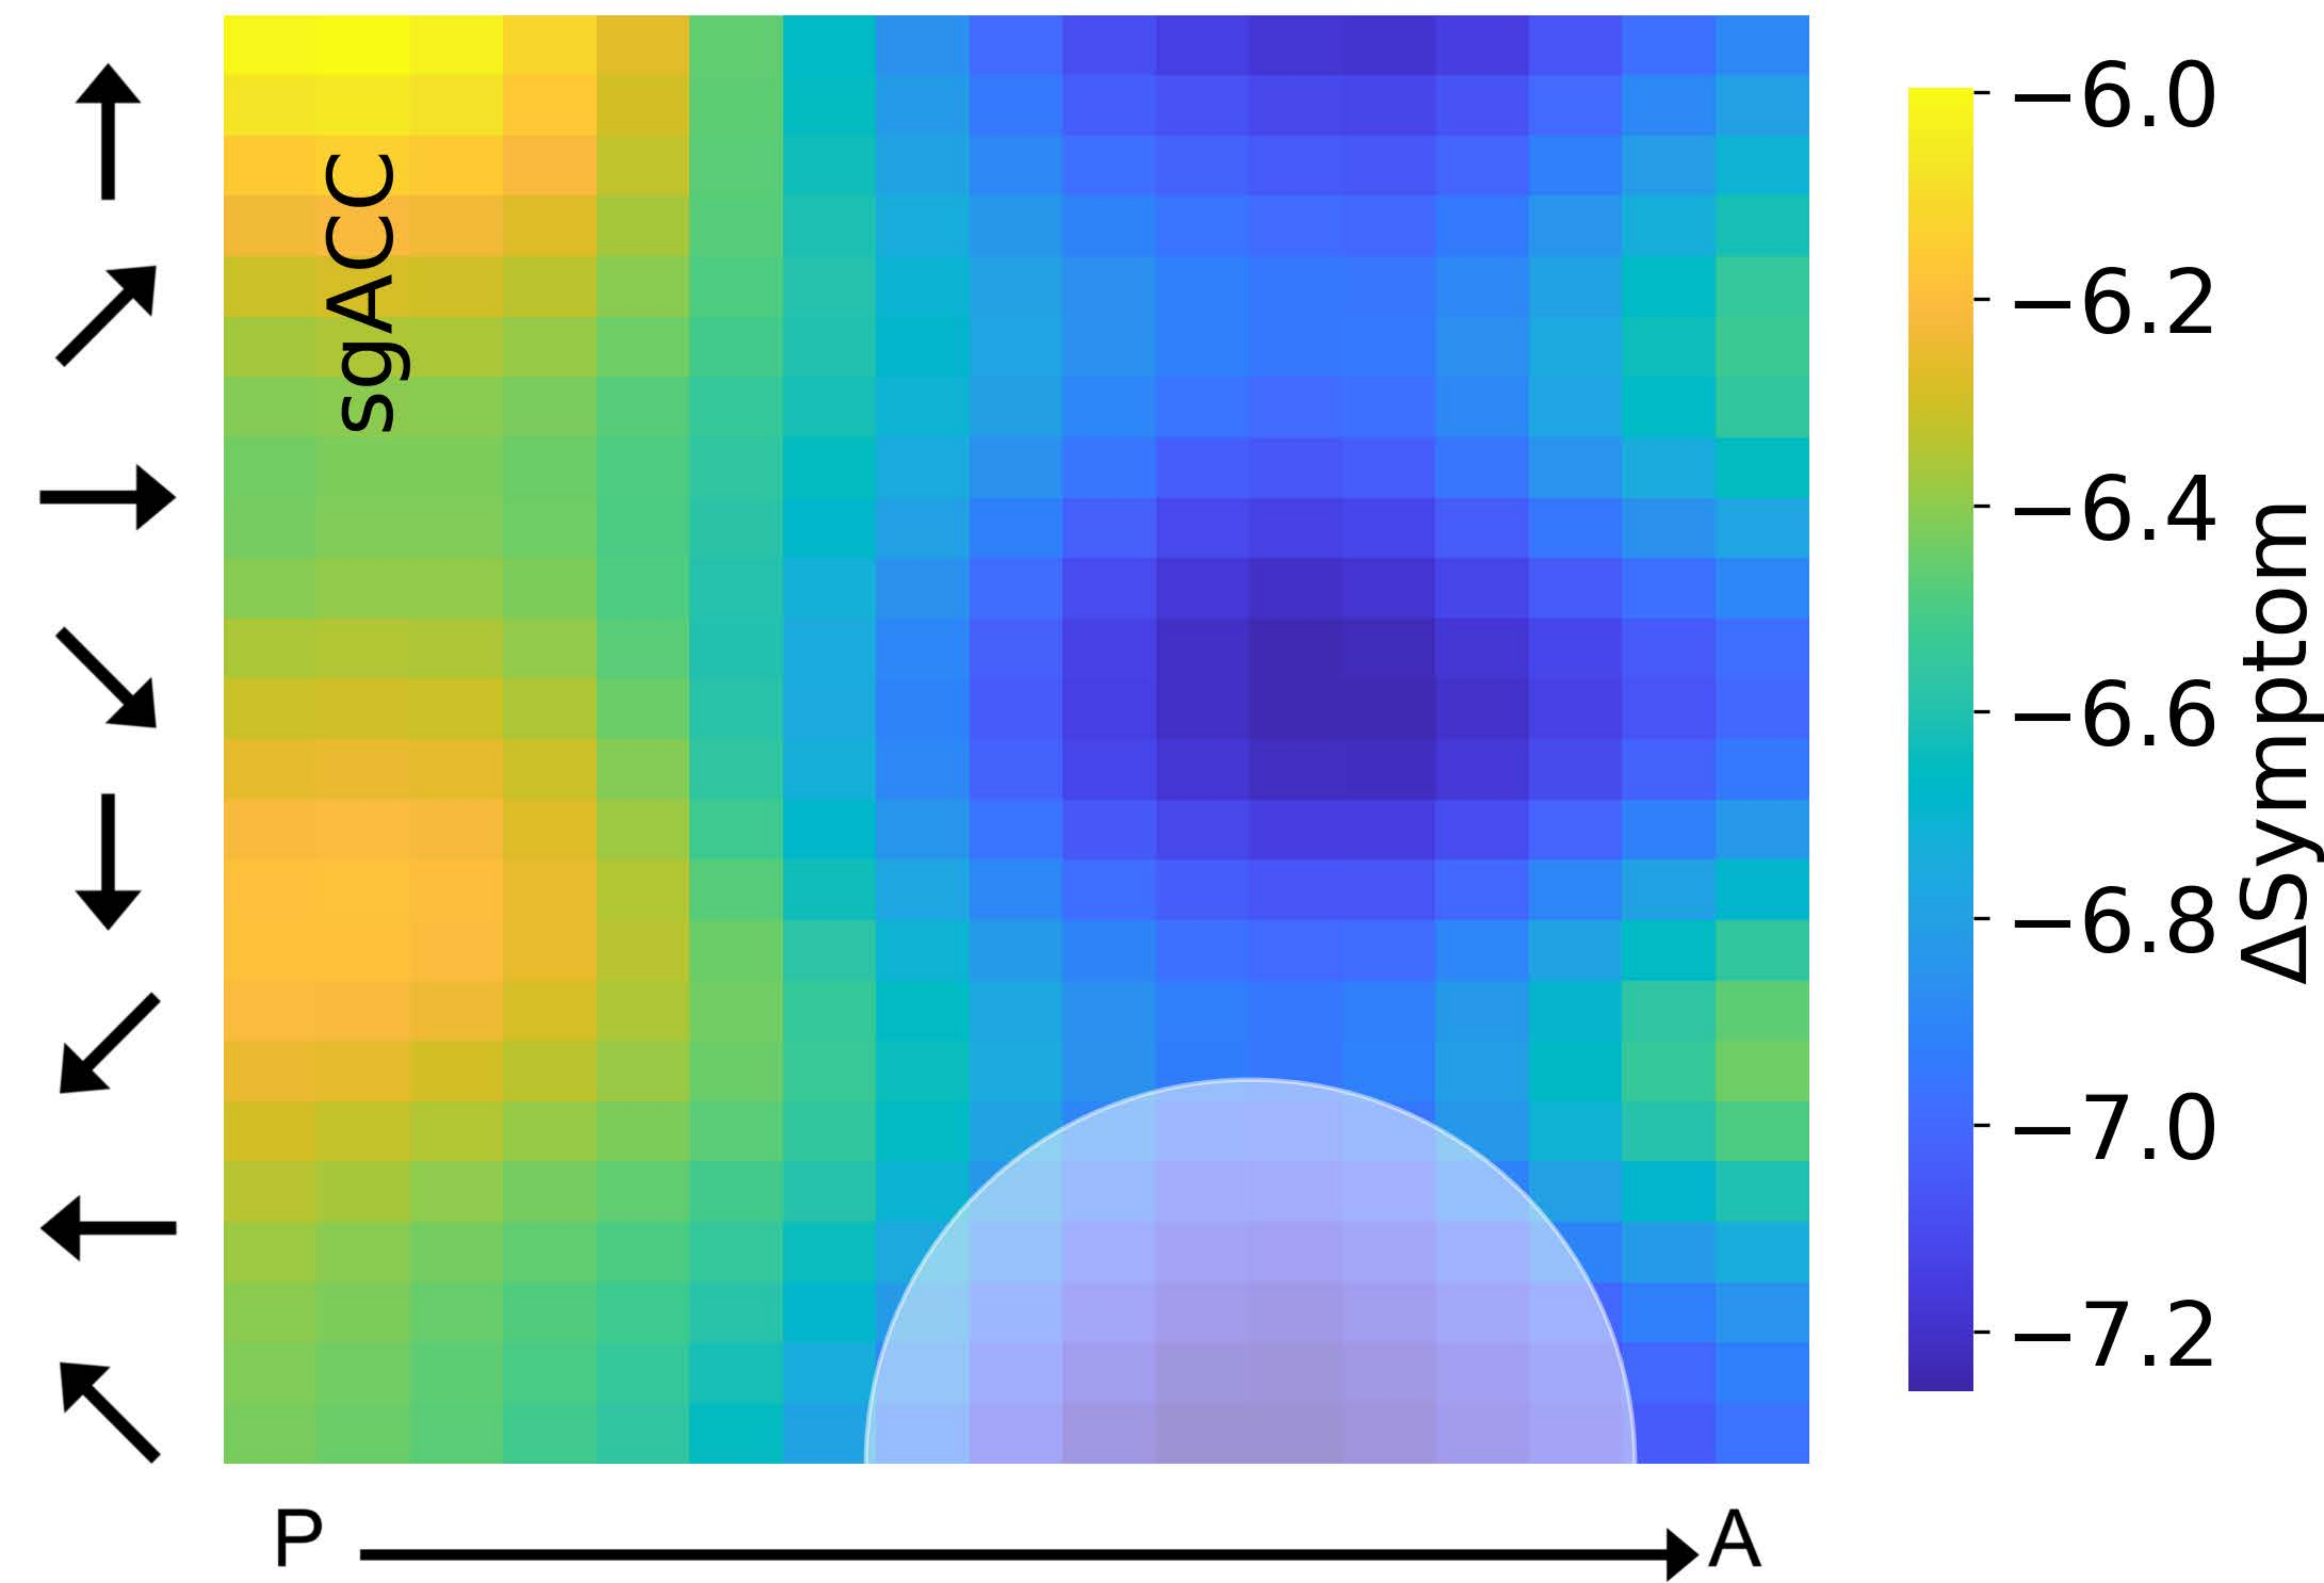



# NDARMD016CB8\_madrs\_right\_dlpfc

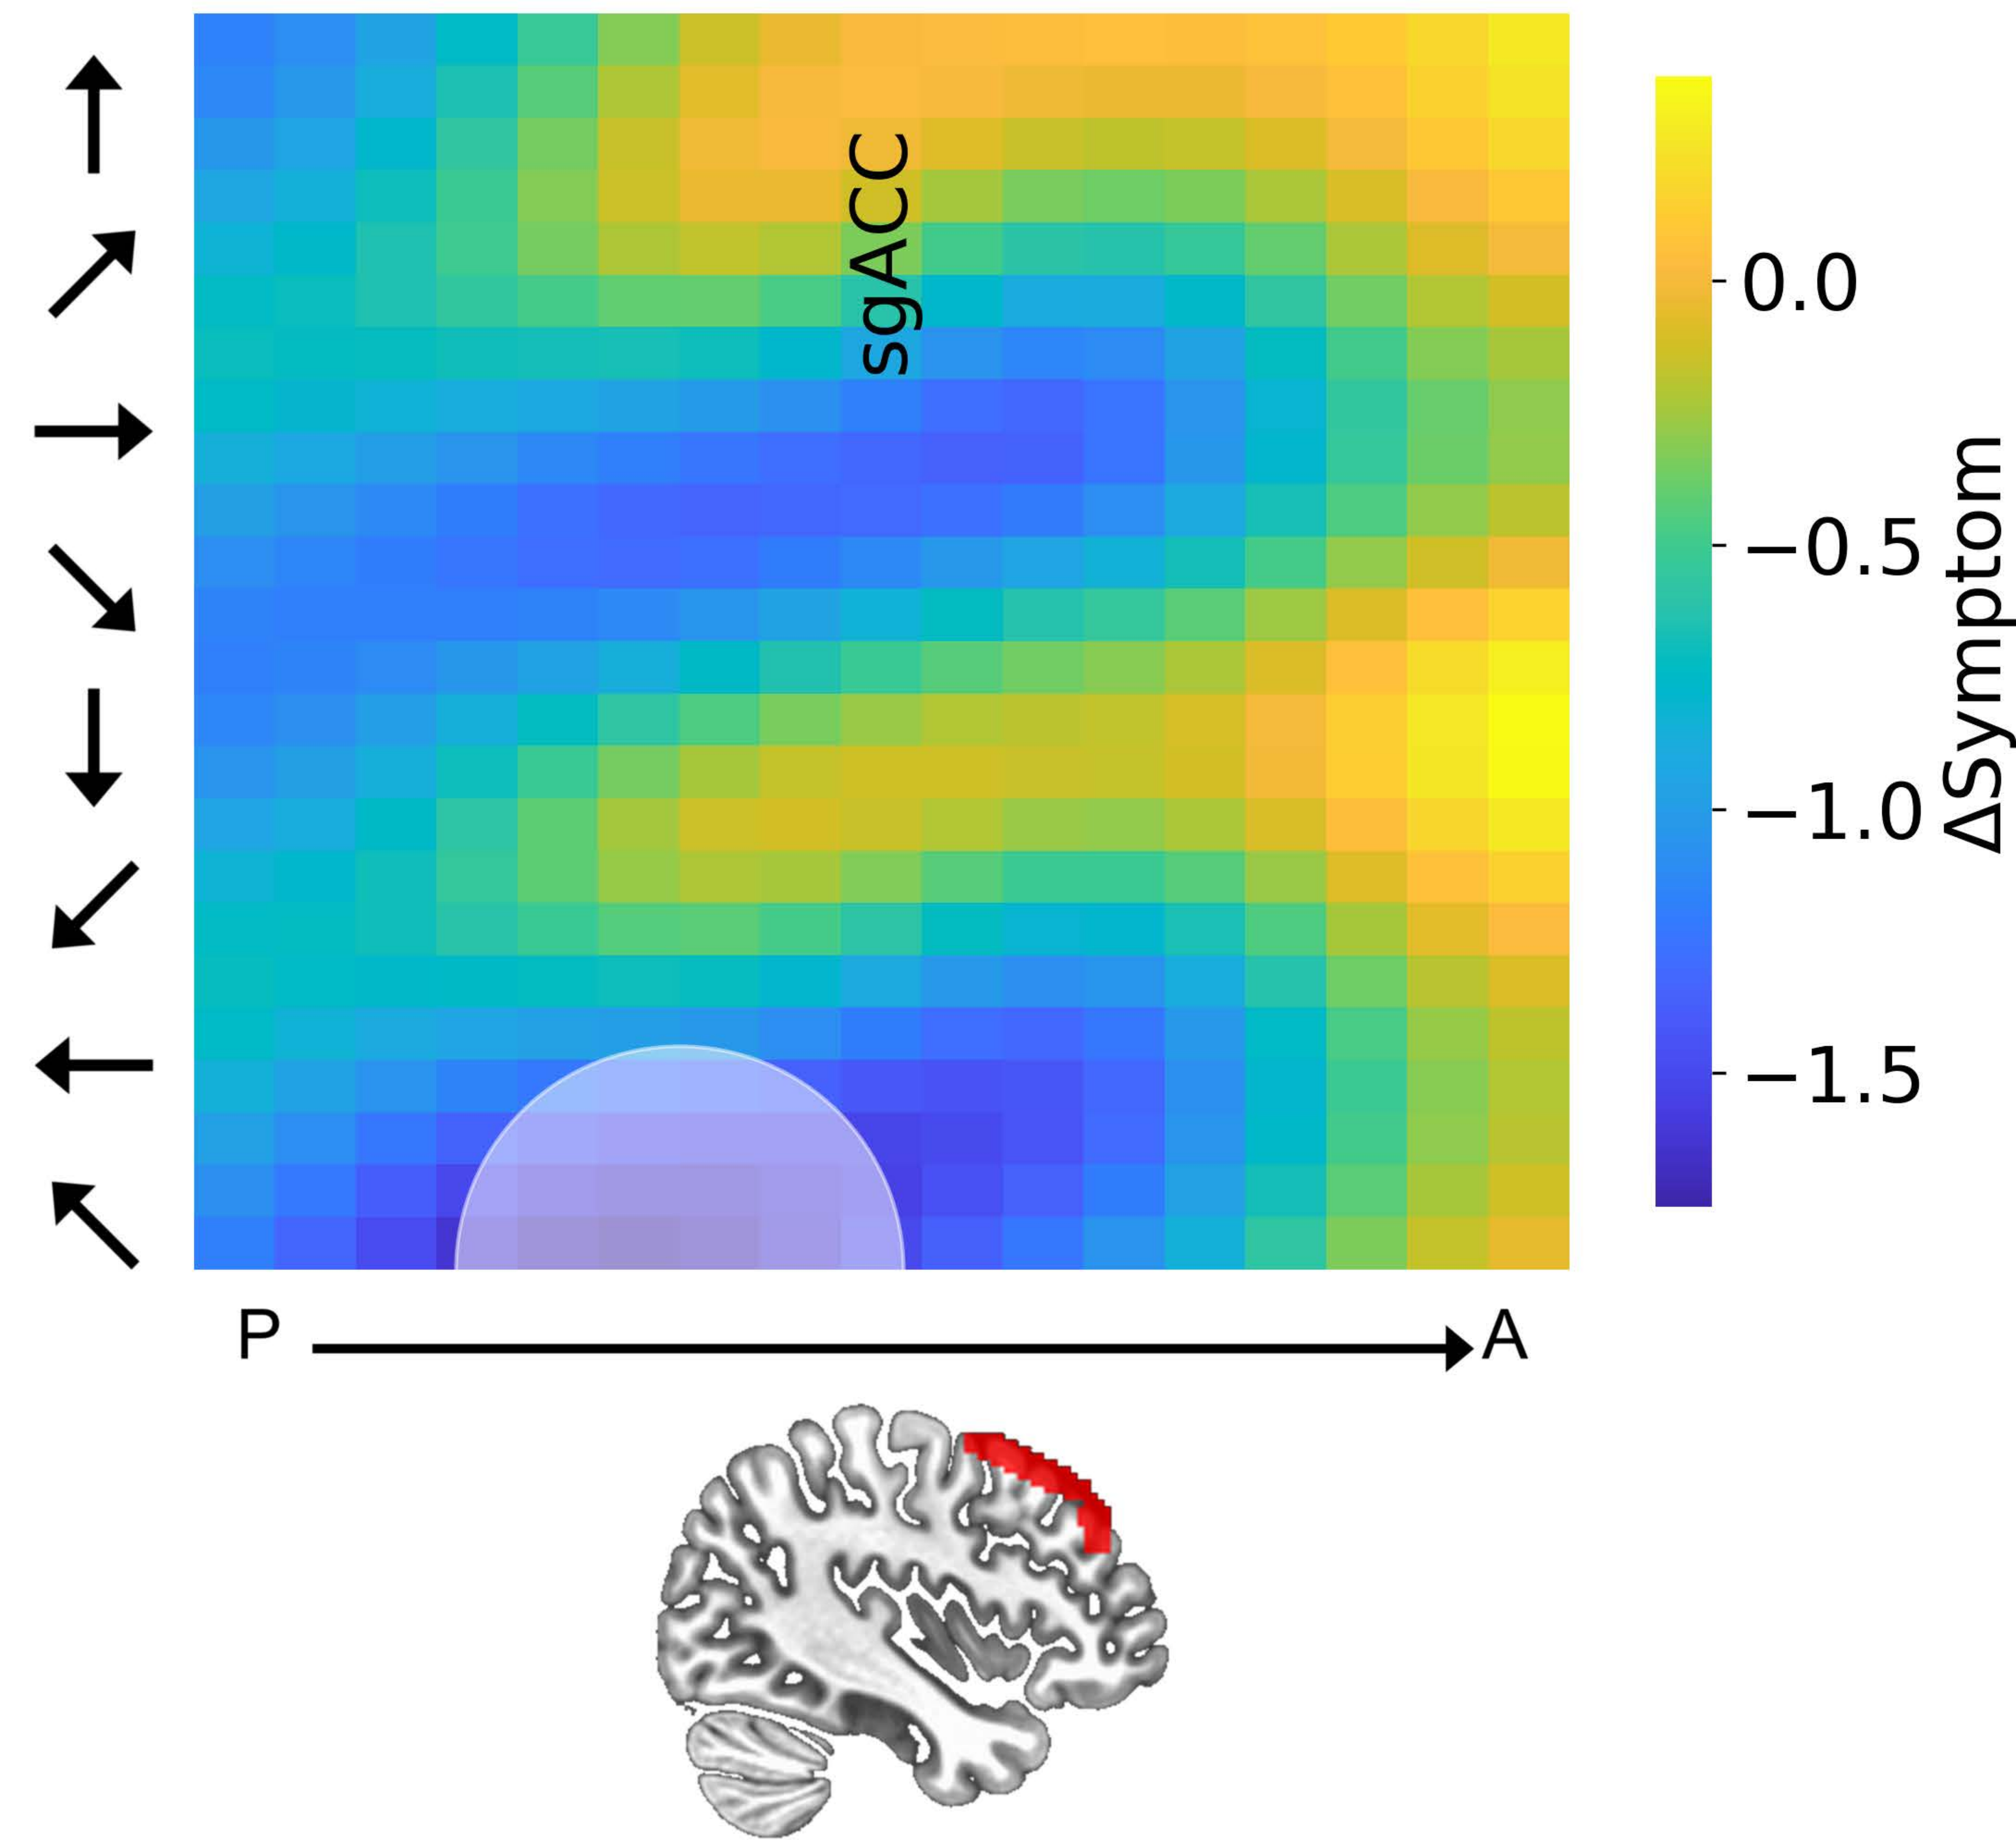



# NDARMD601CTU\_madrs\_right\_dlpfc

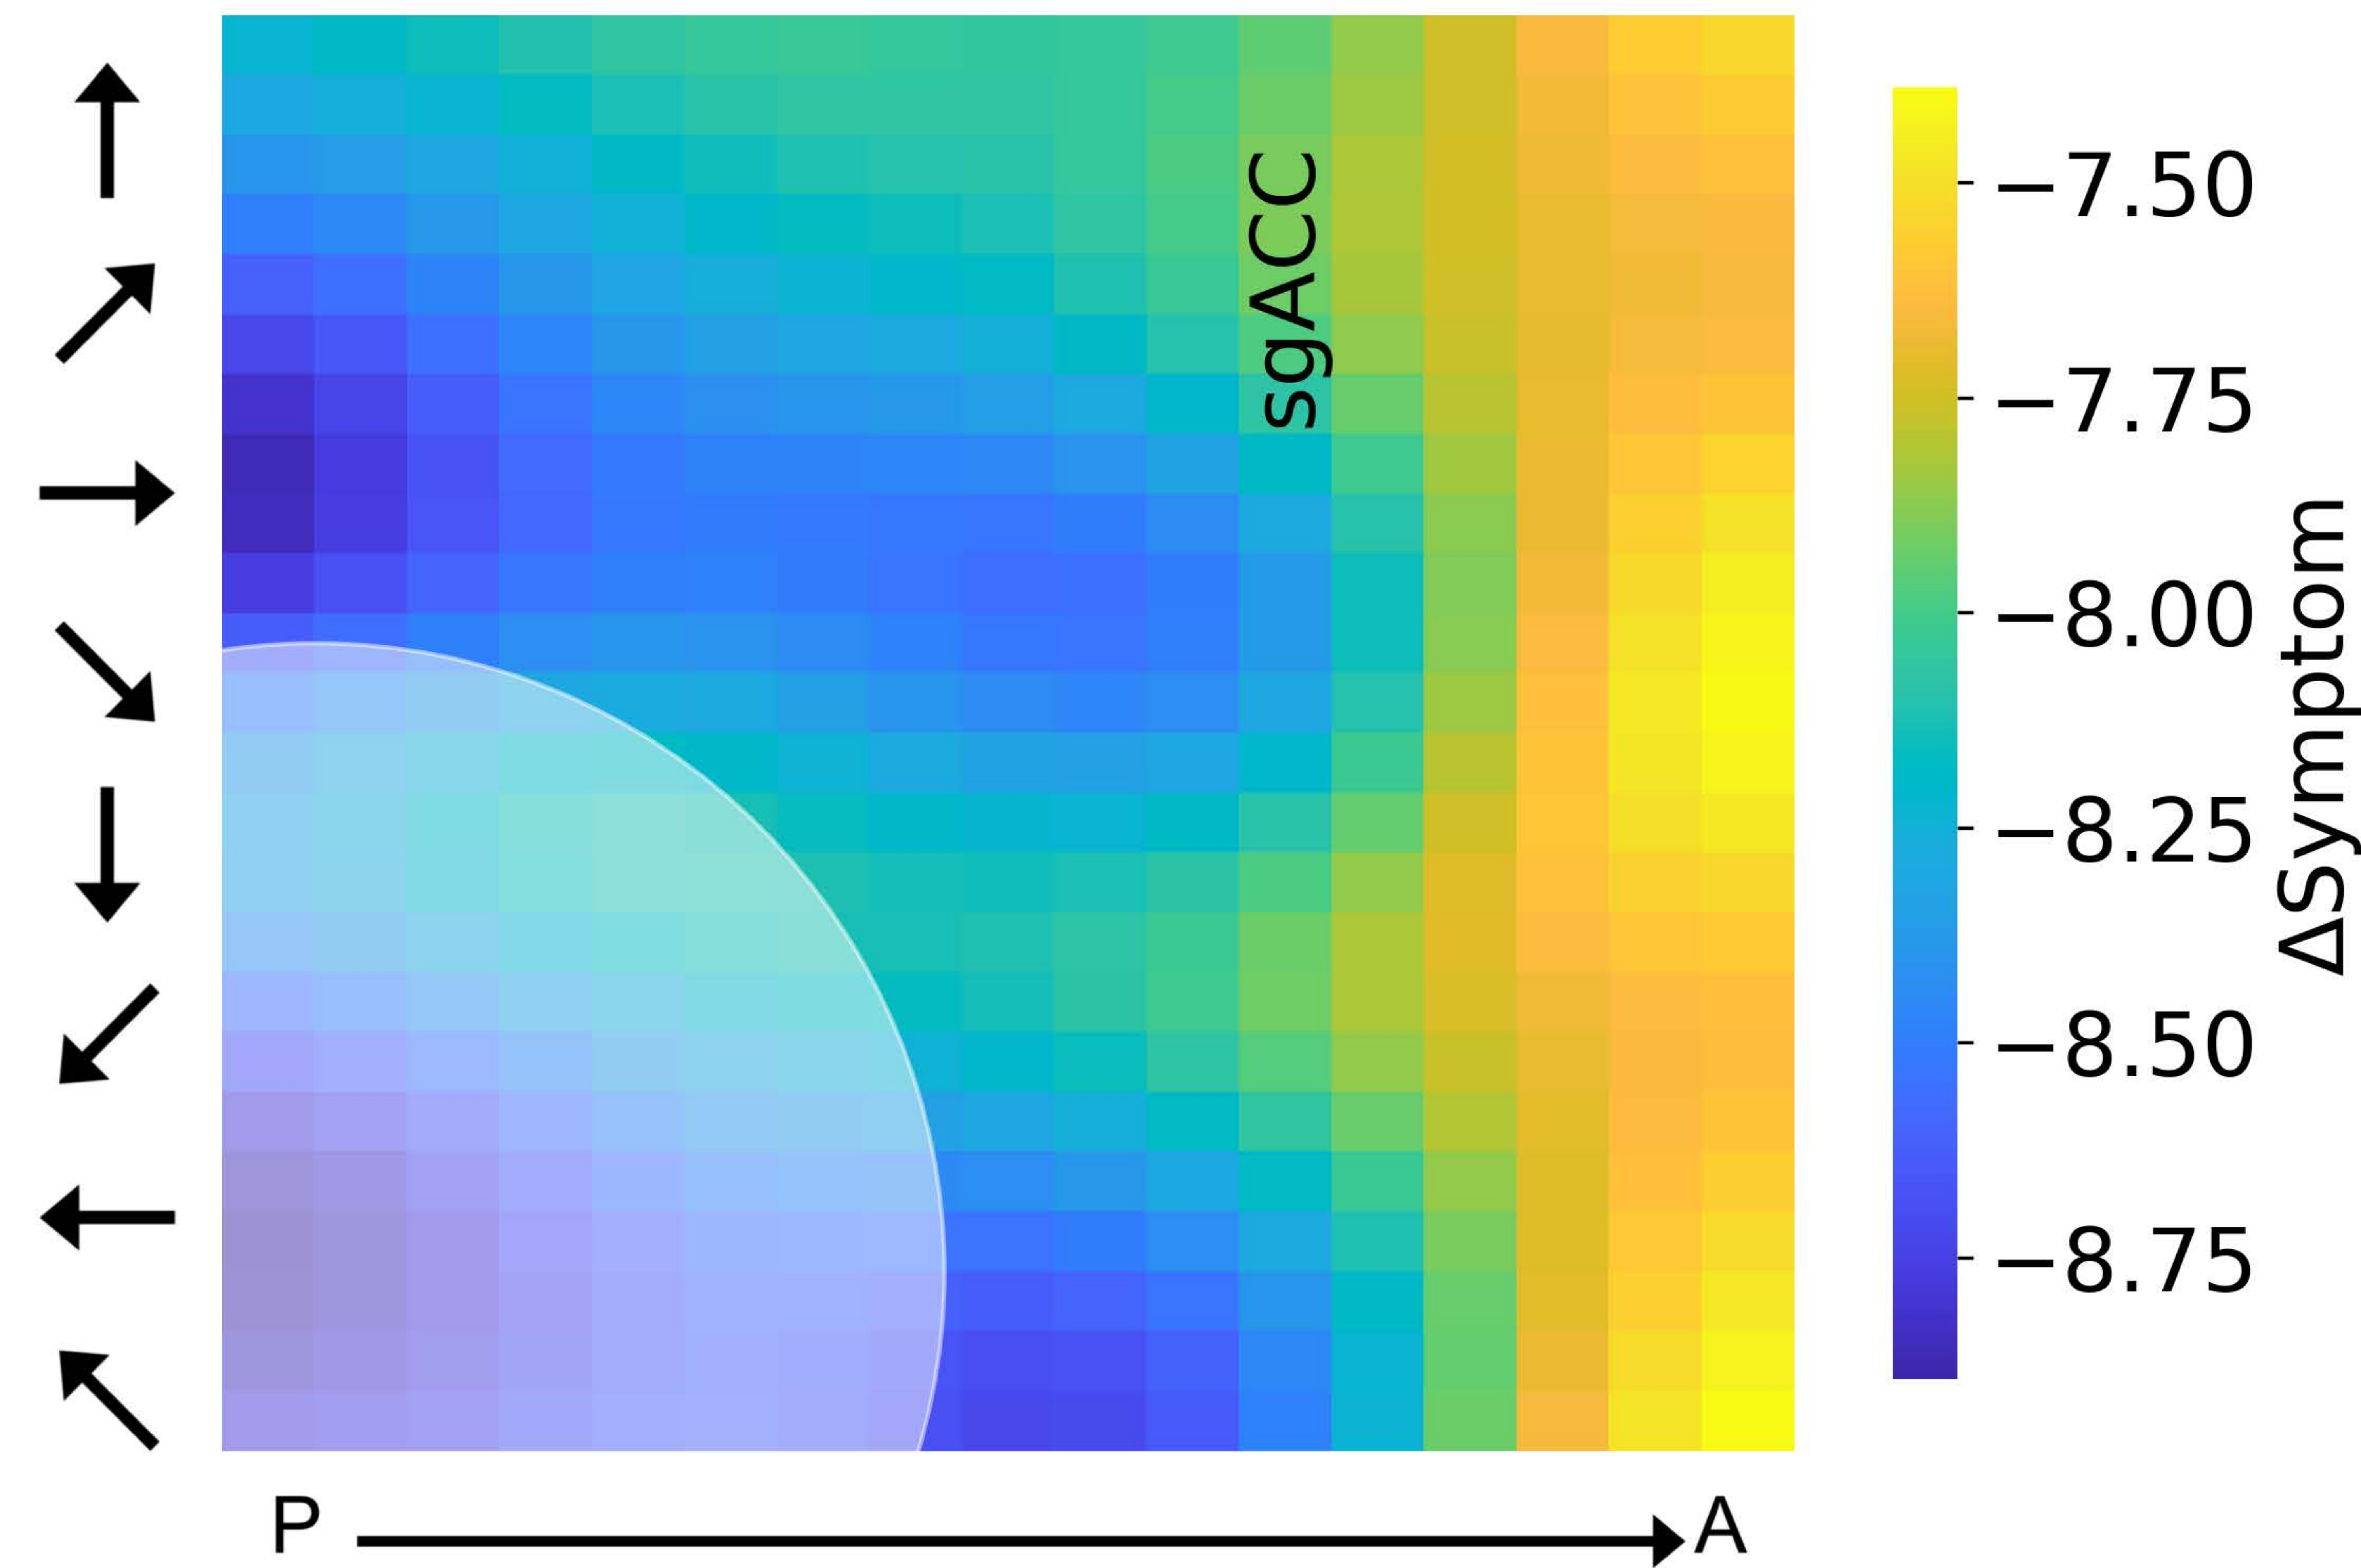



# NDARME189AXP\_madrs\_right\_dlpfc

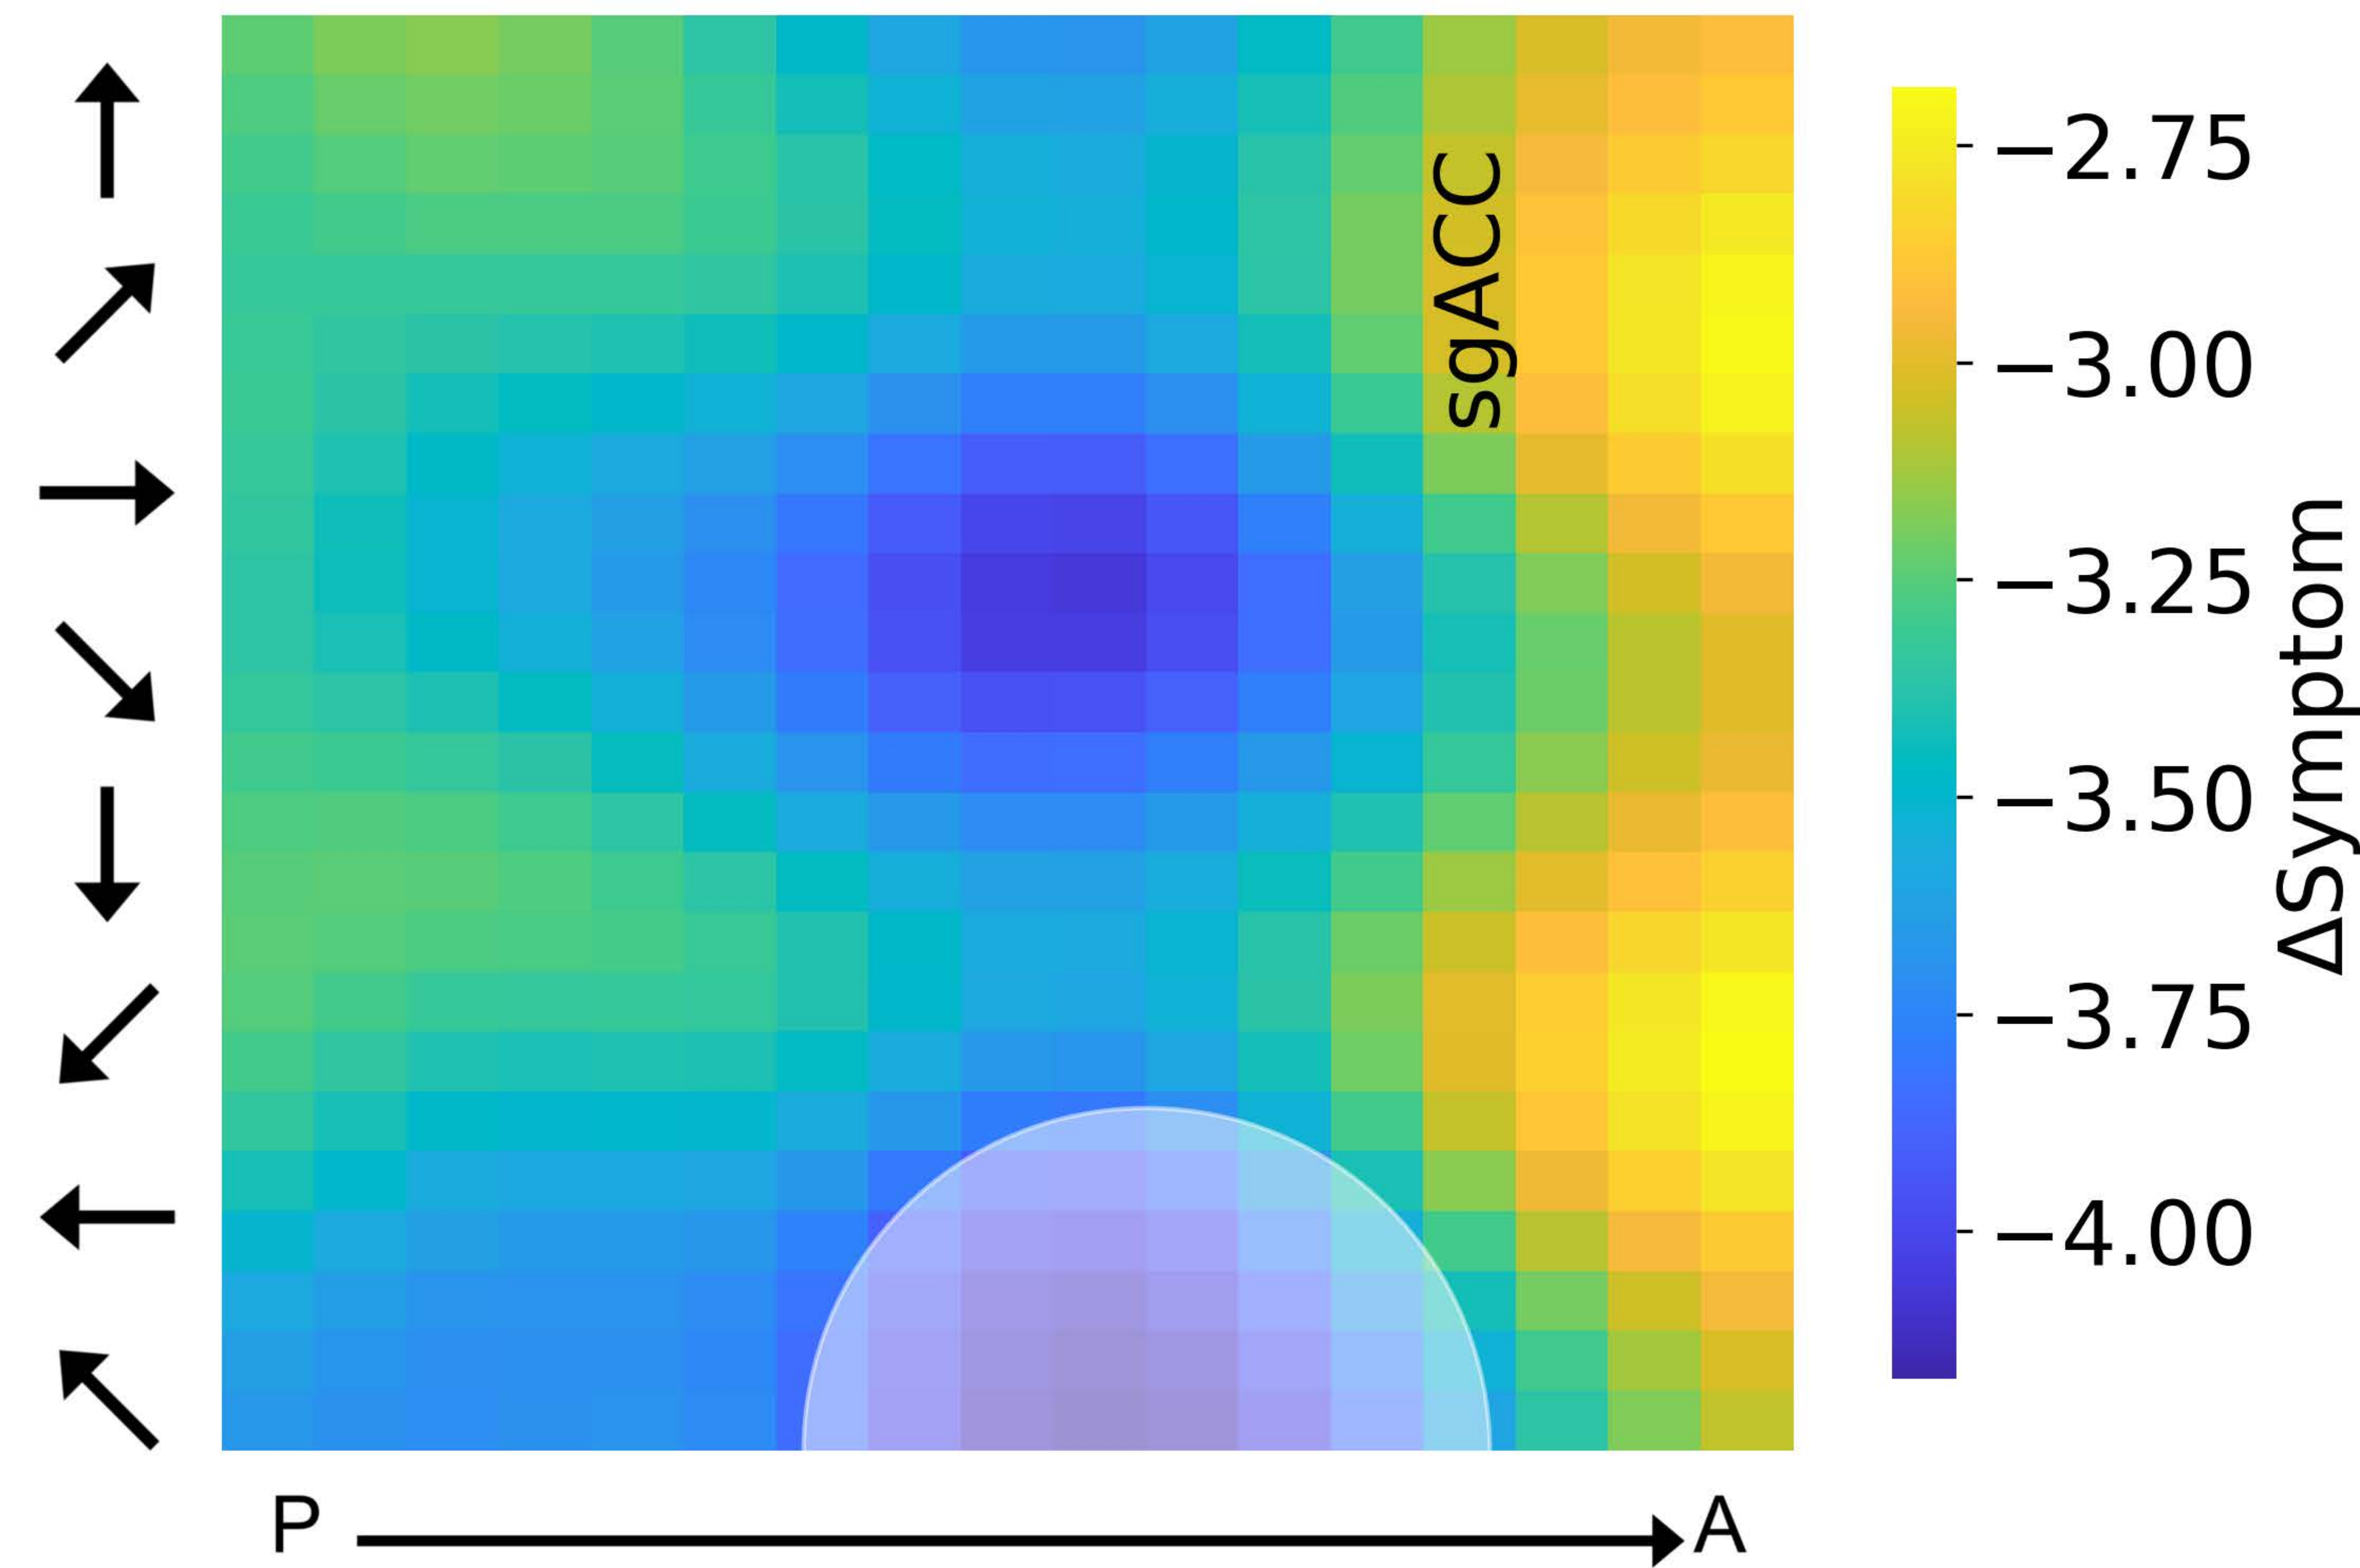



# NDARME335LZJ\_madr\_right\_dlpfc

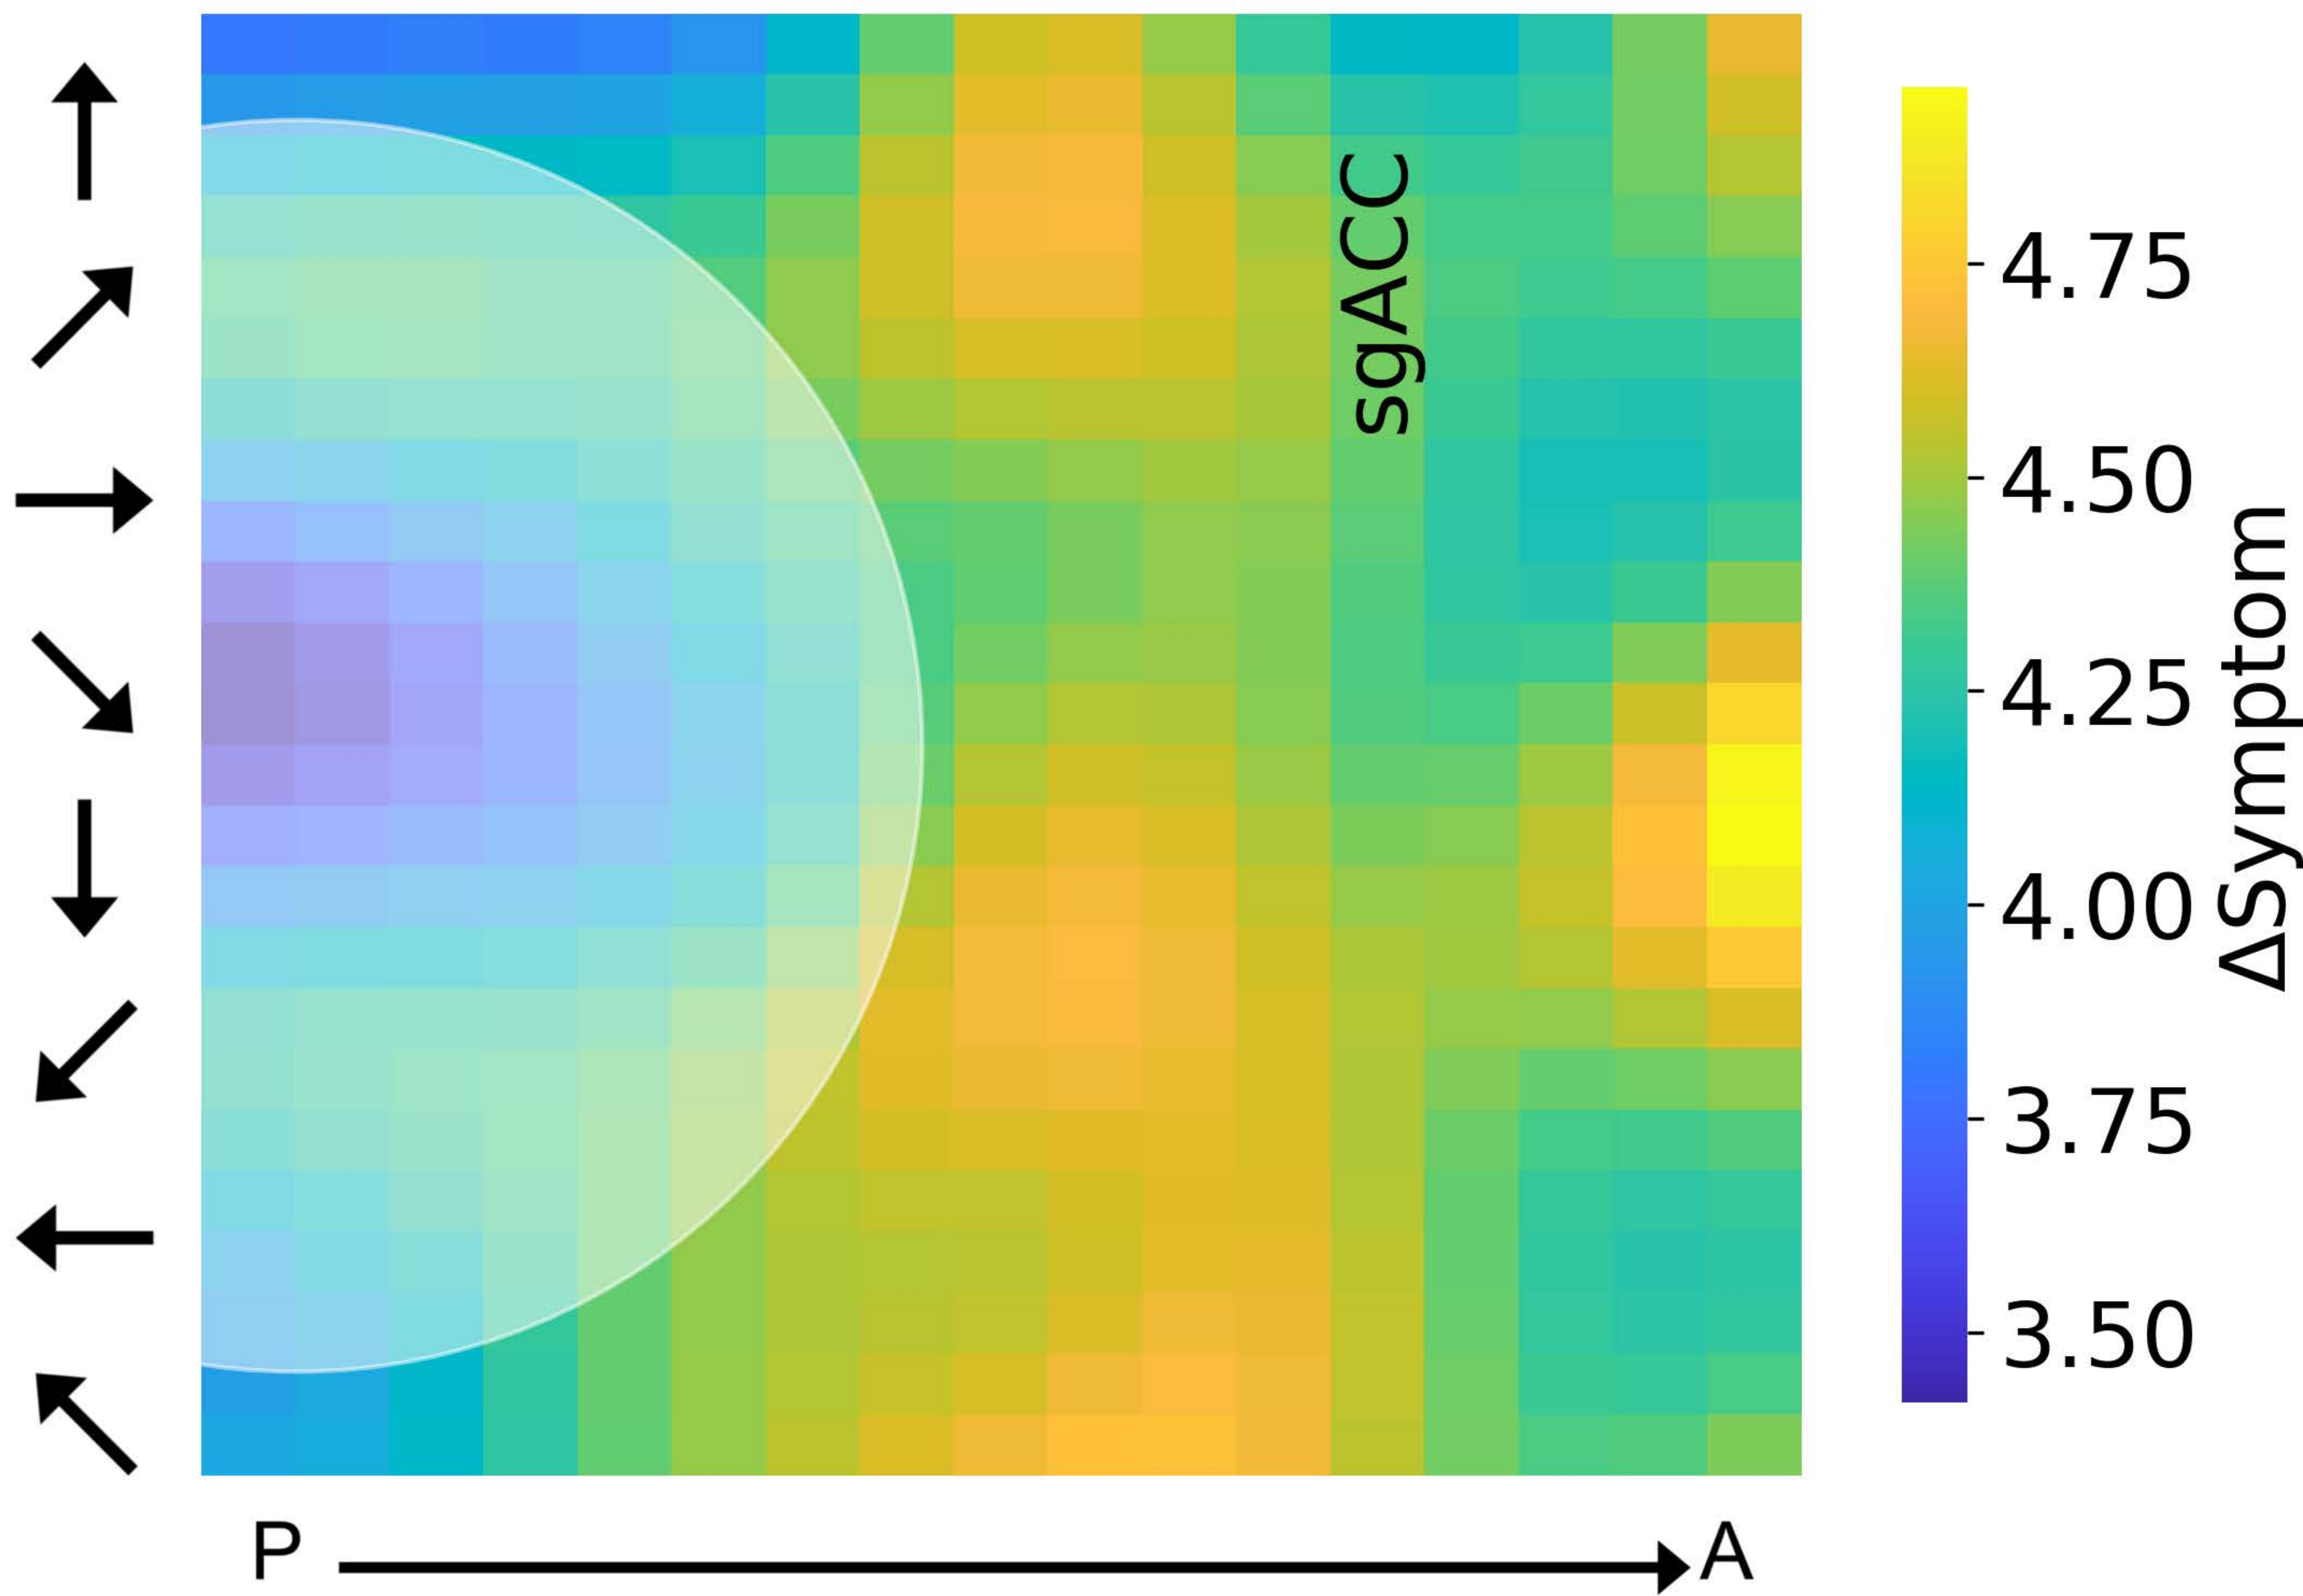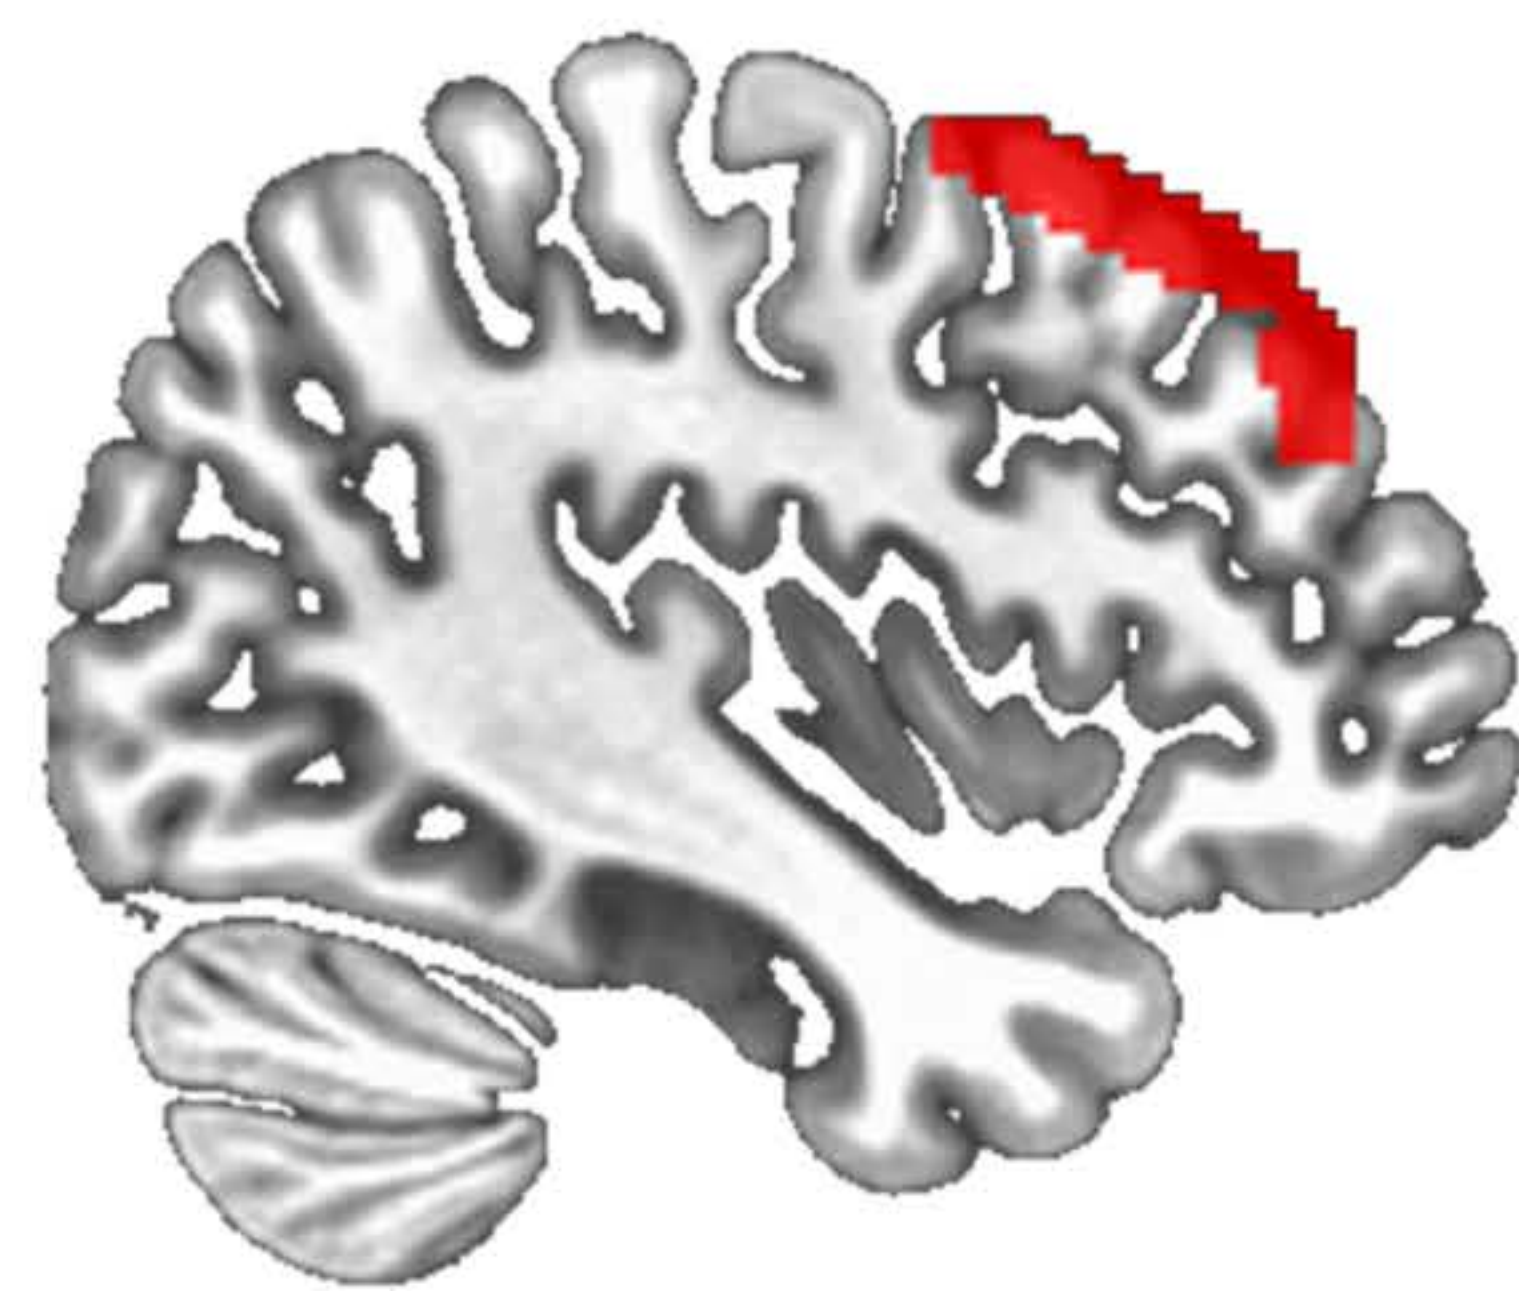



# NDARMF293AHT\_madrs\_right\_dlpfc

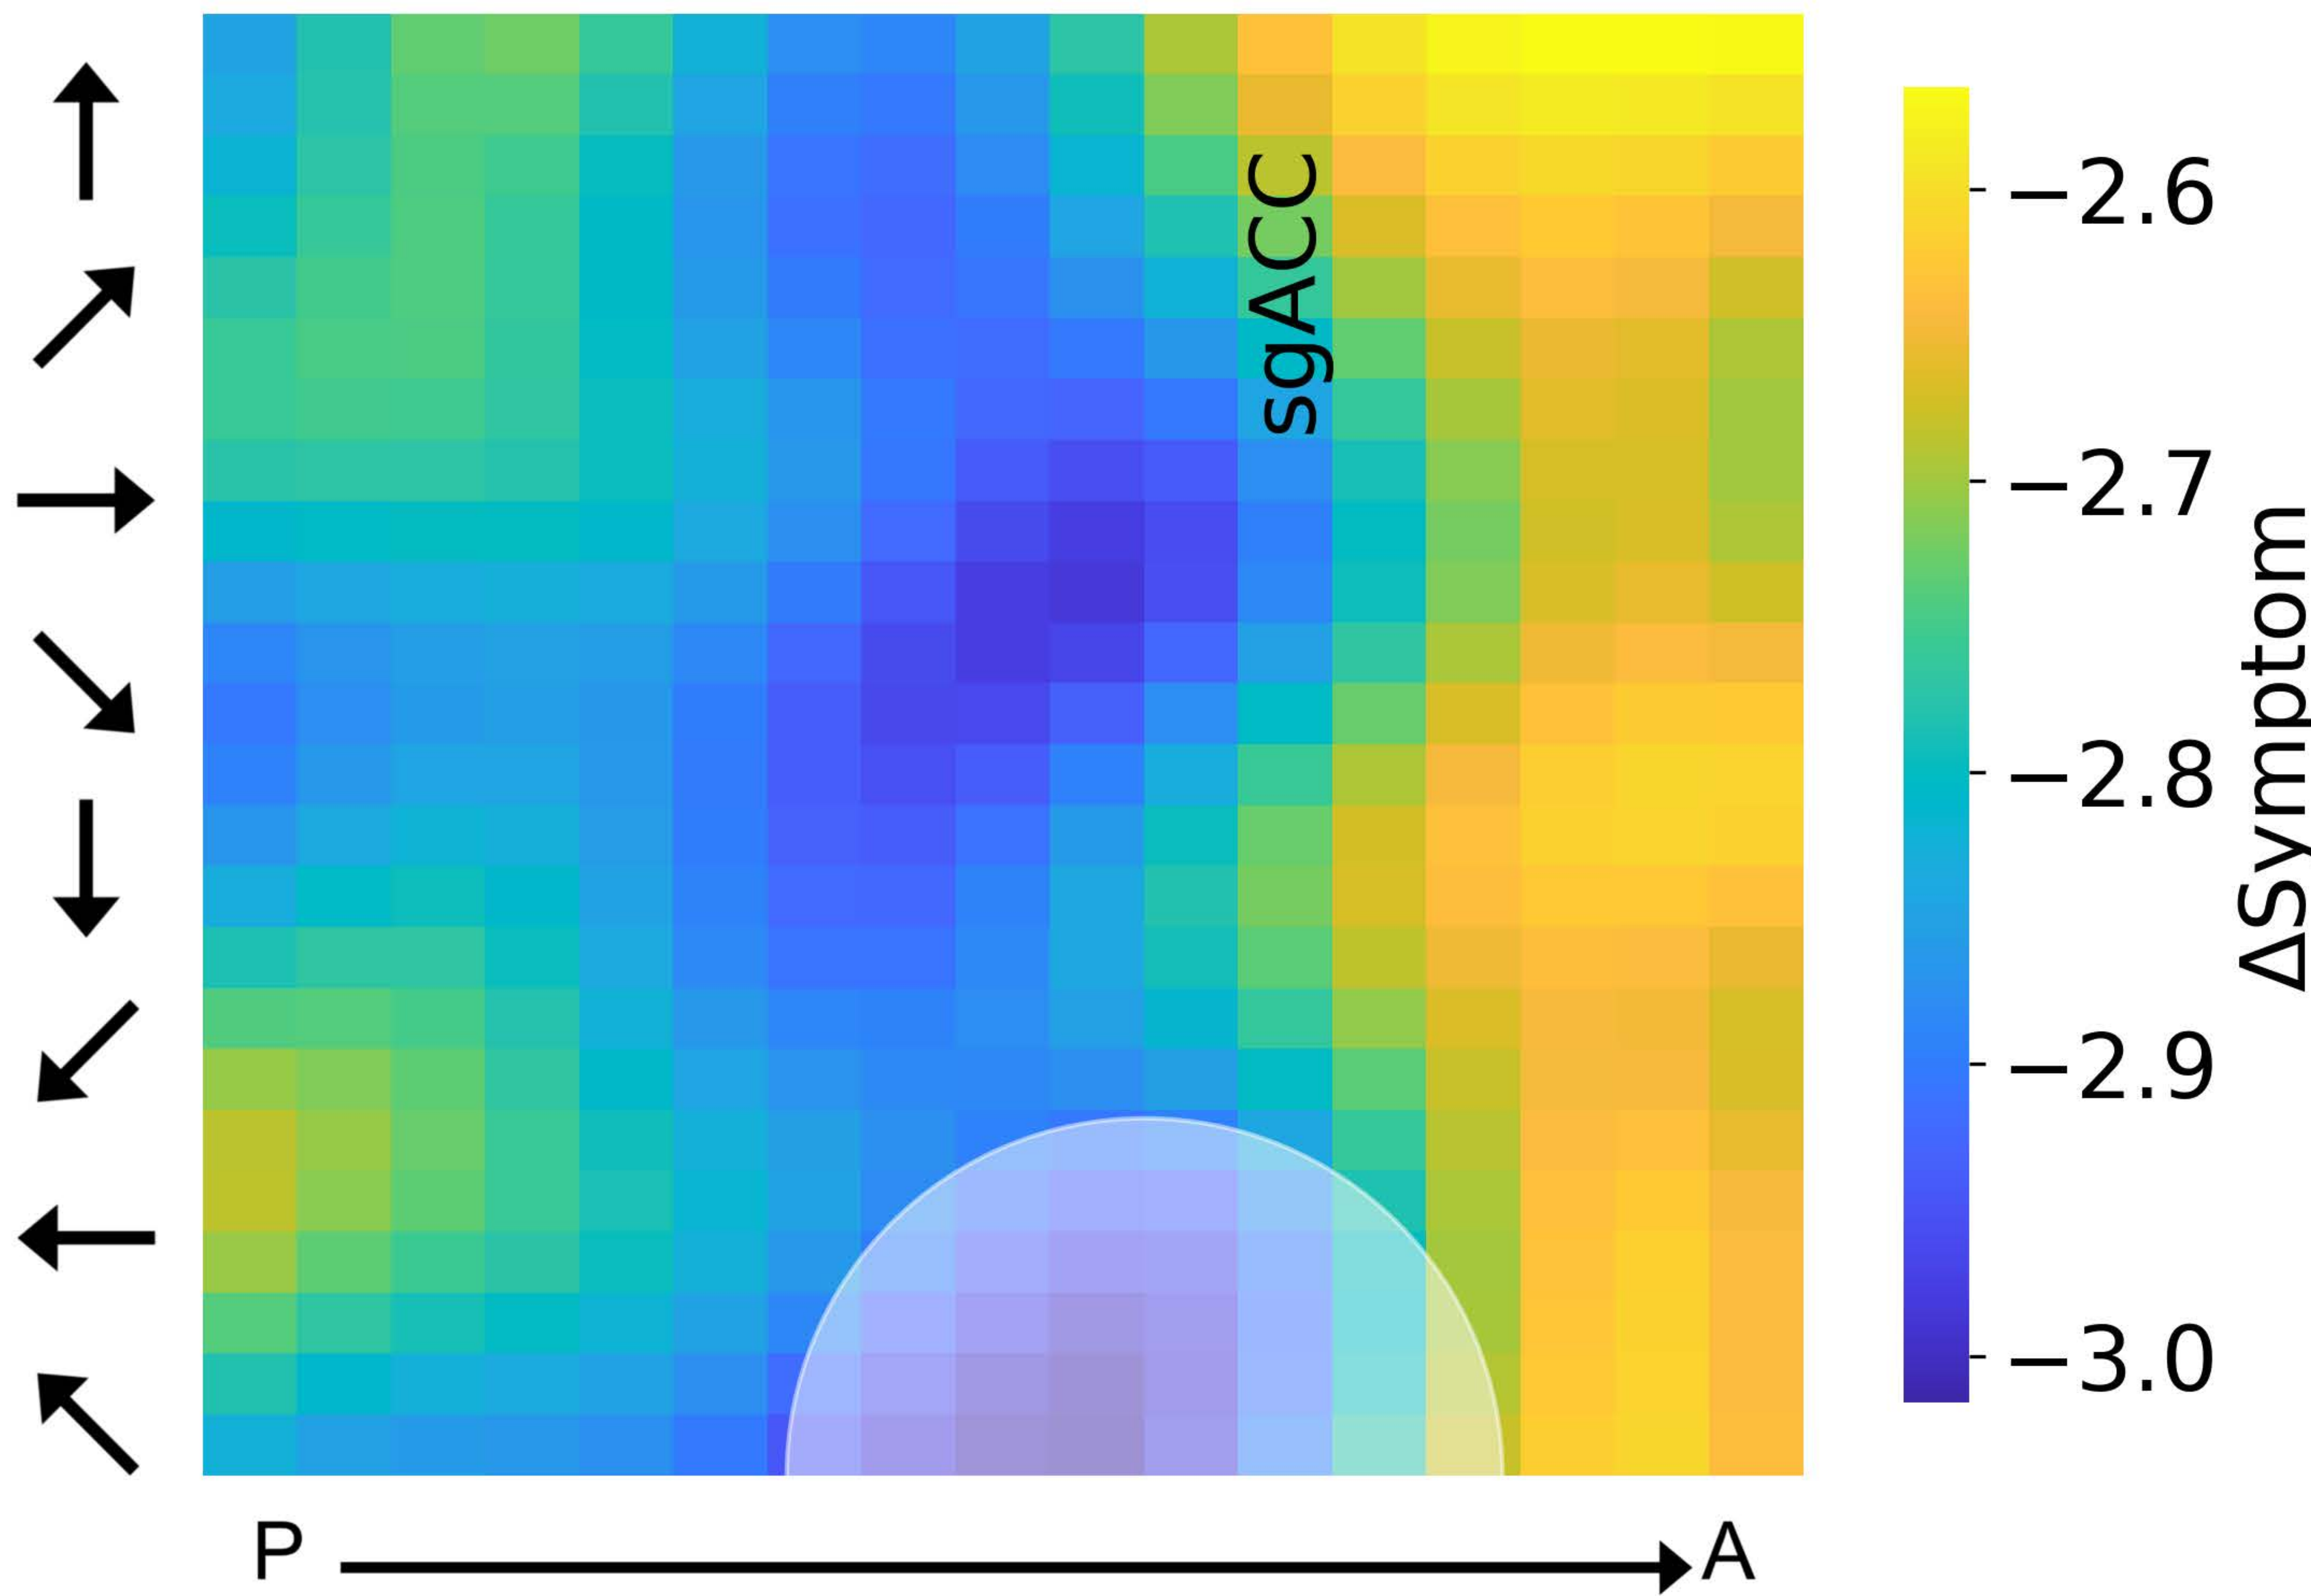



# INDARMK972BFE\_madrs\_right\_dlpfc

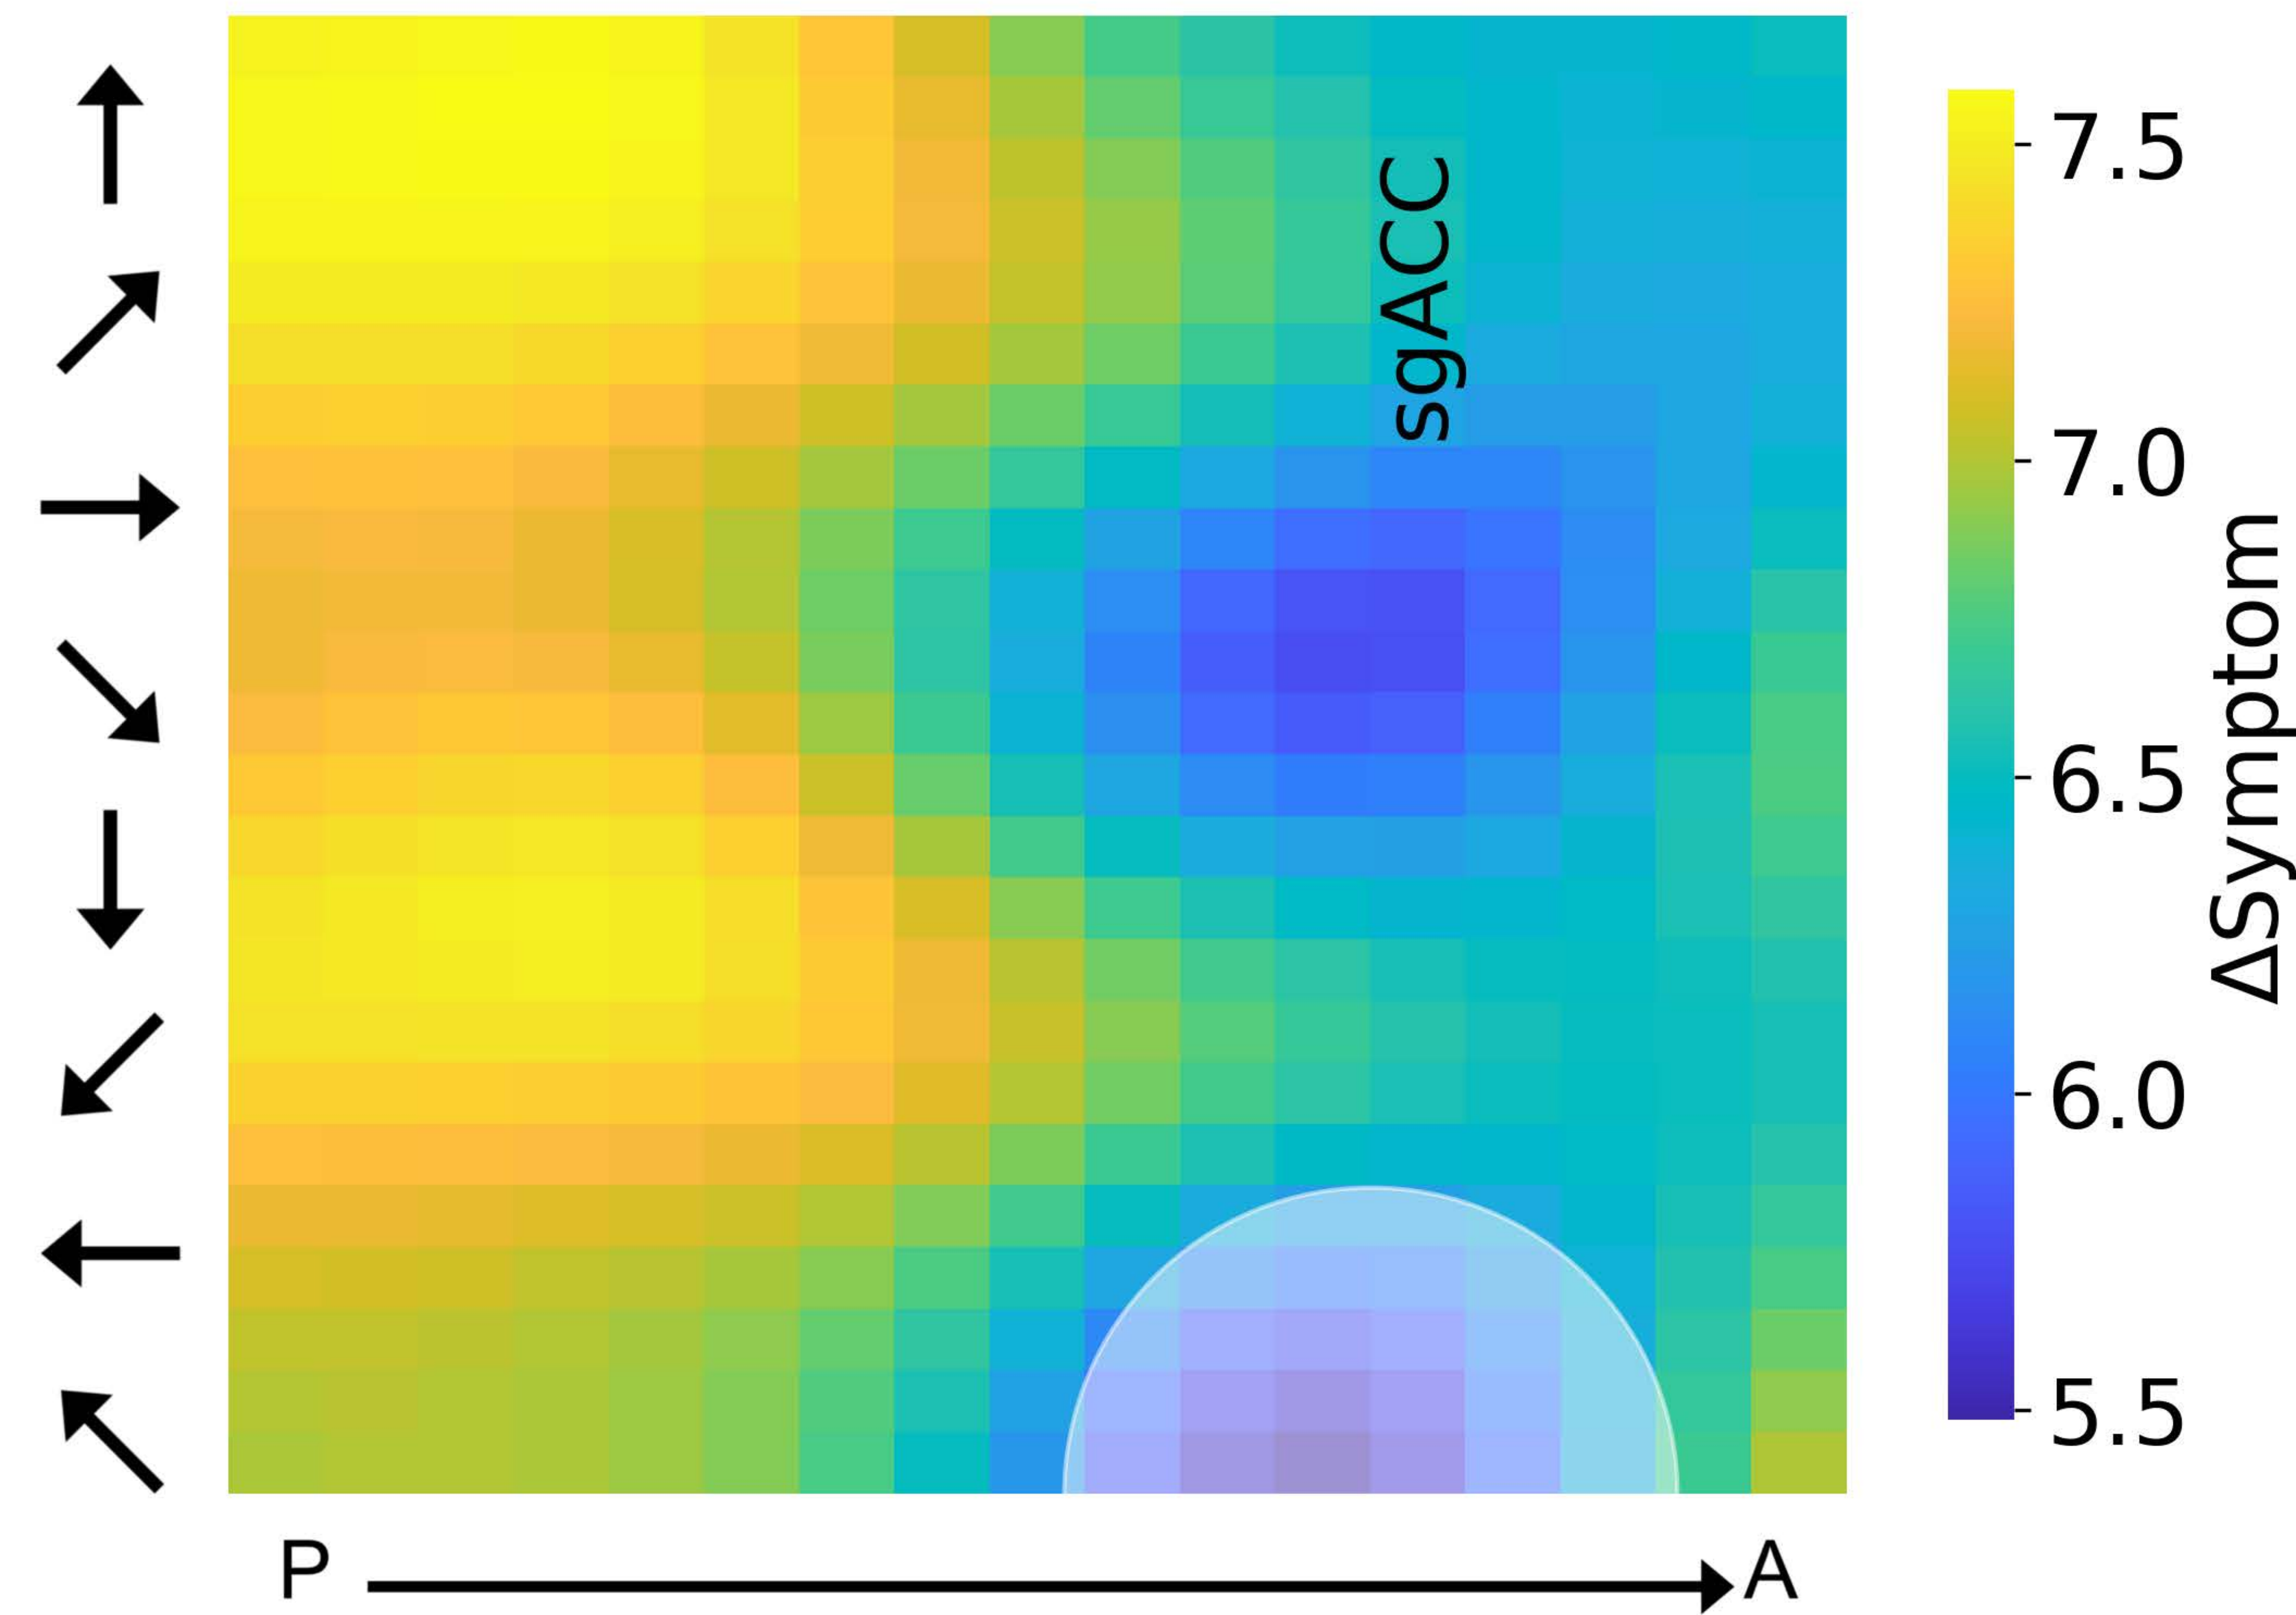



# NDARNA955LXG\_madrs\_right\_dlpfc

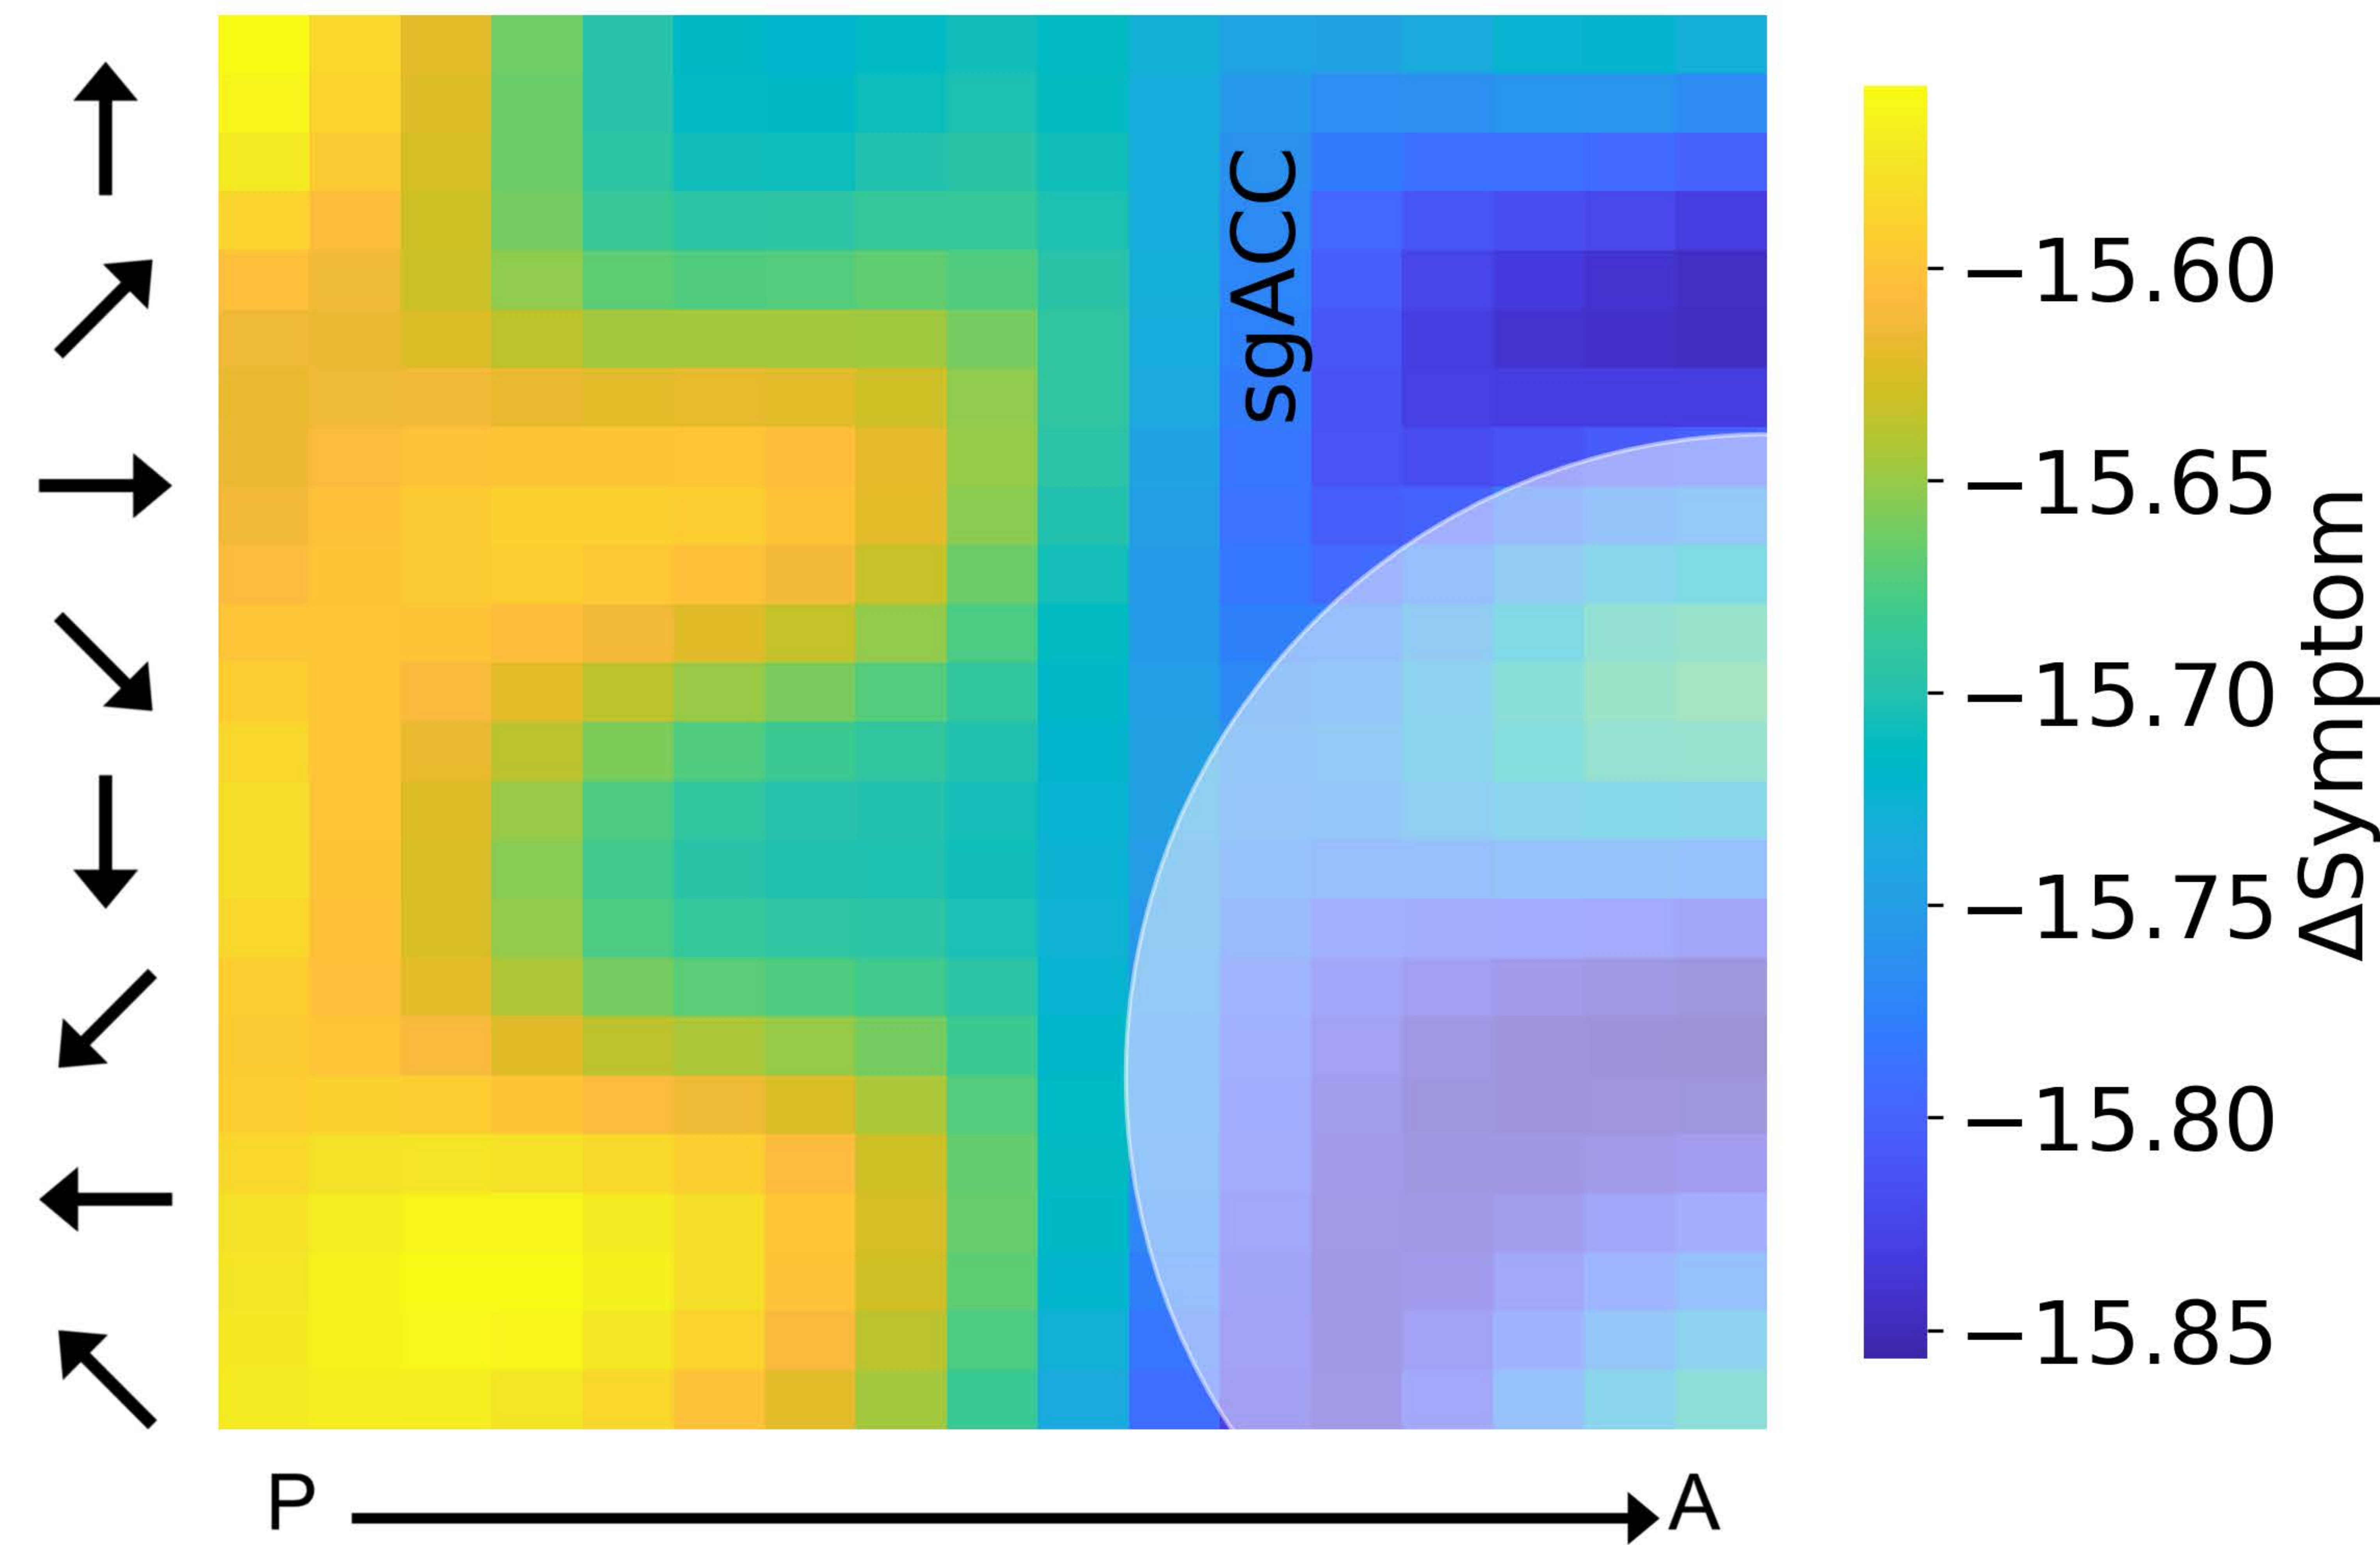



# NDARNR764NAK\_madrs\_right\_dlpfc

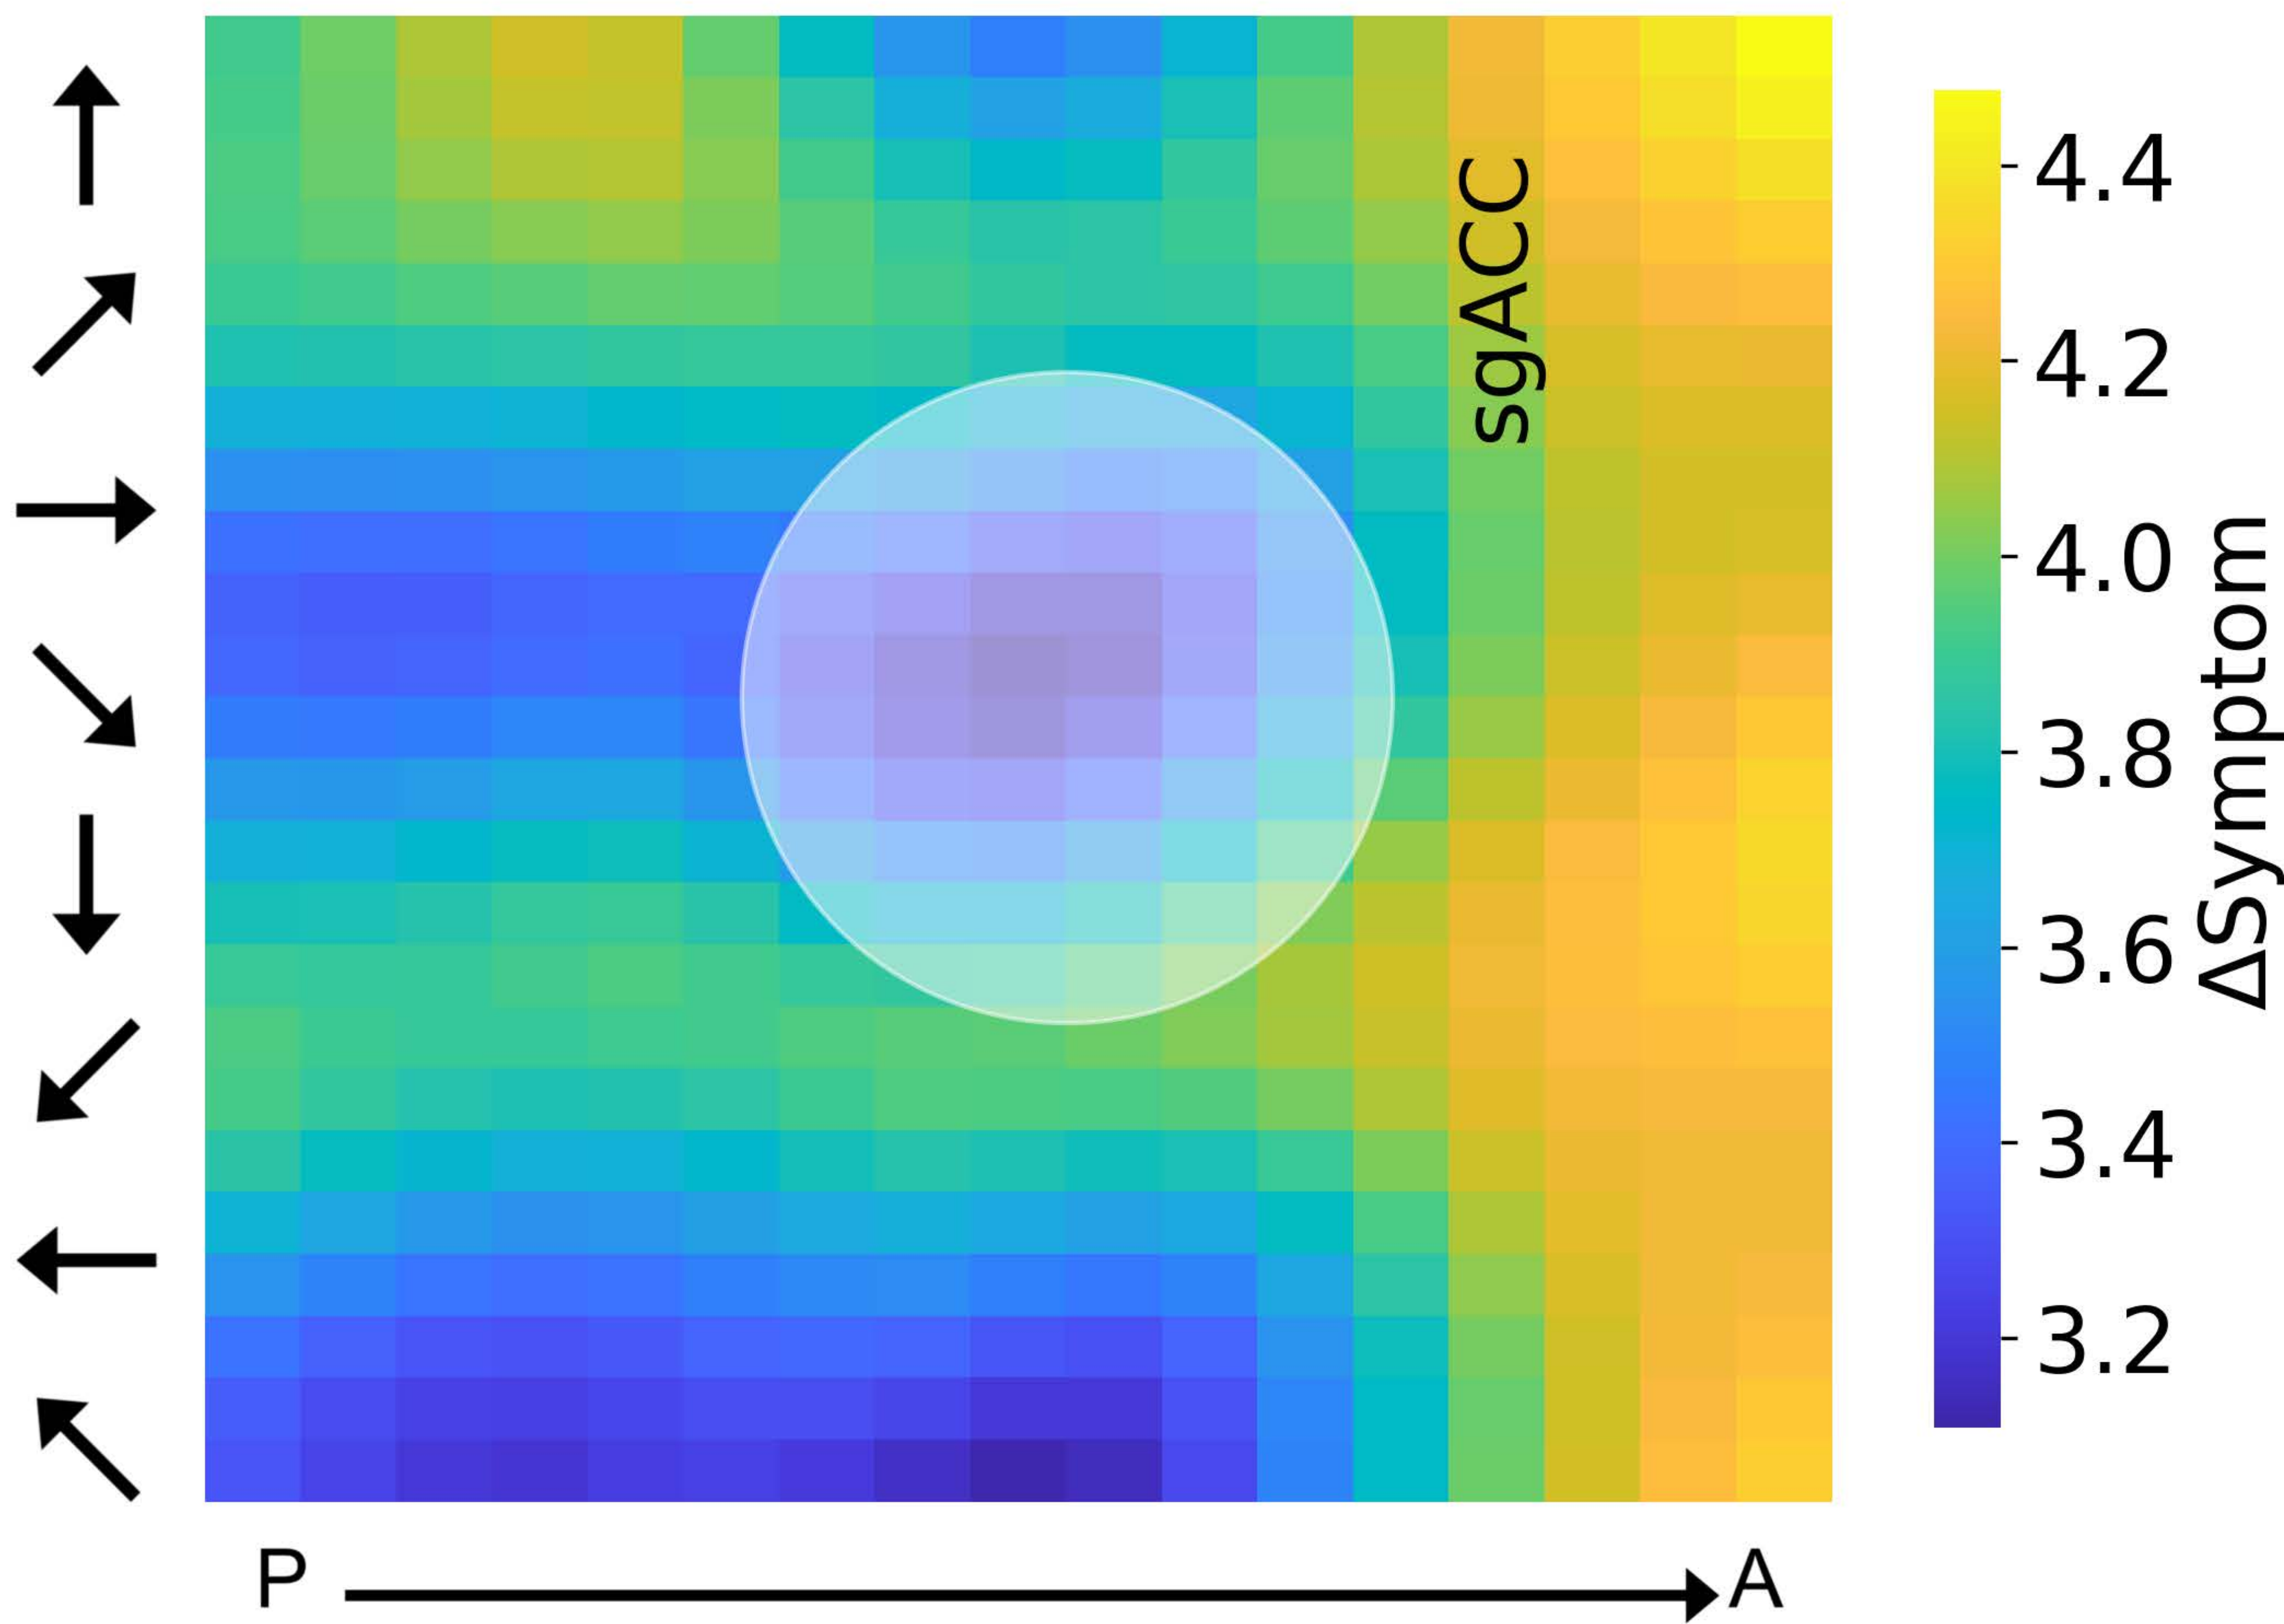



# NDARNU180HL3\_madrs\_right\_dlpfc

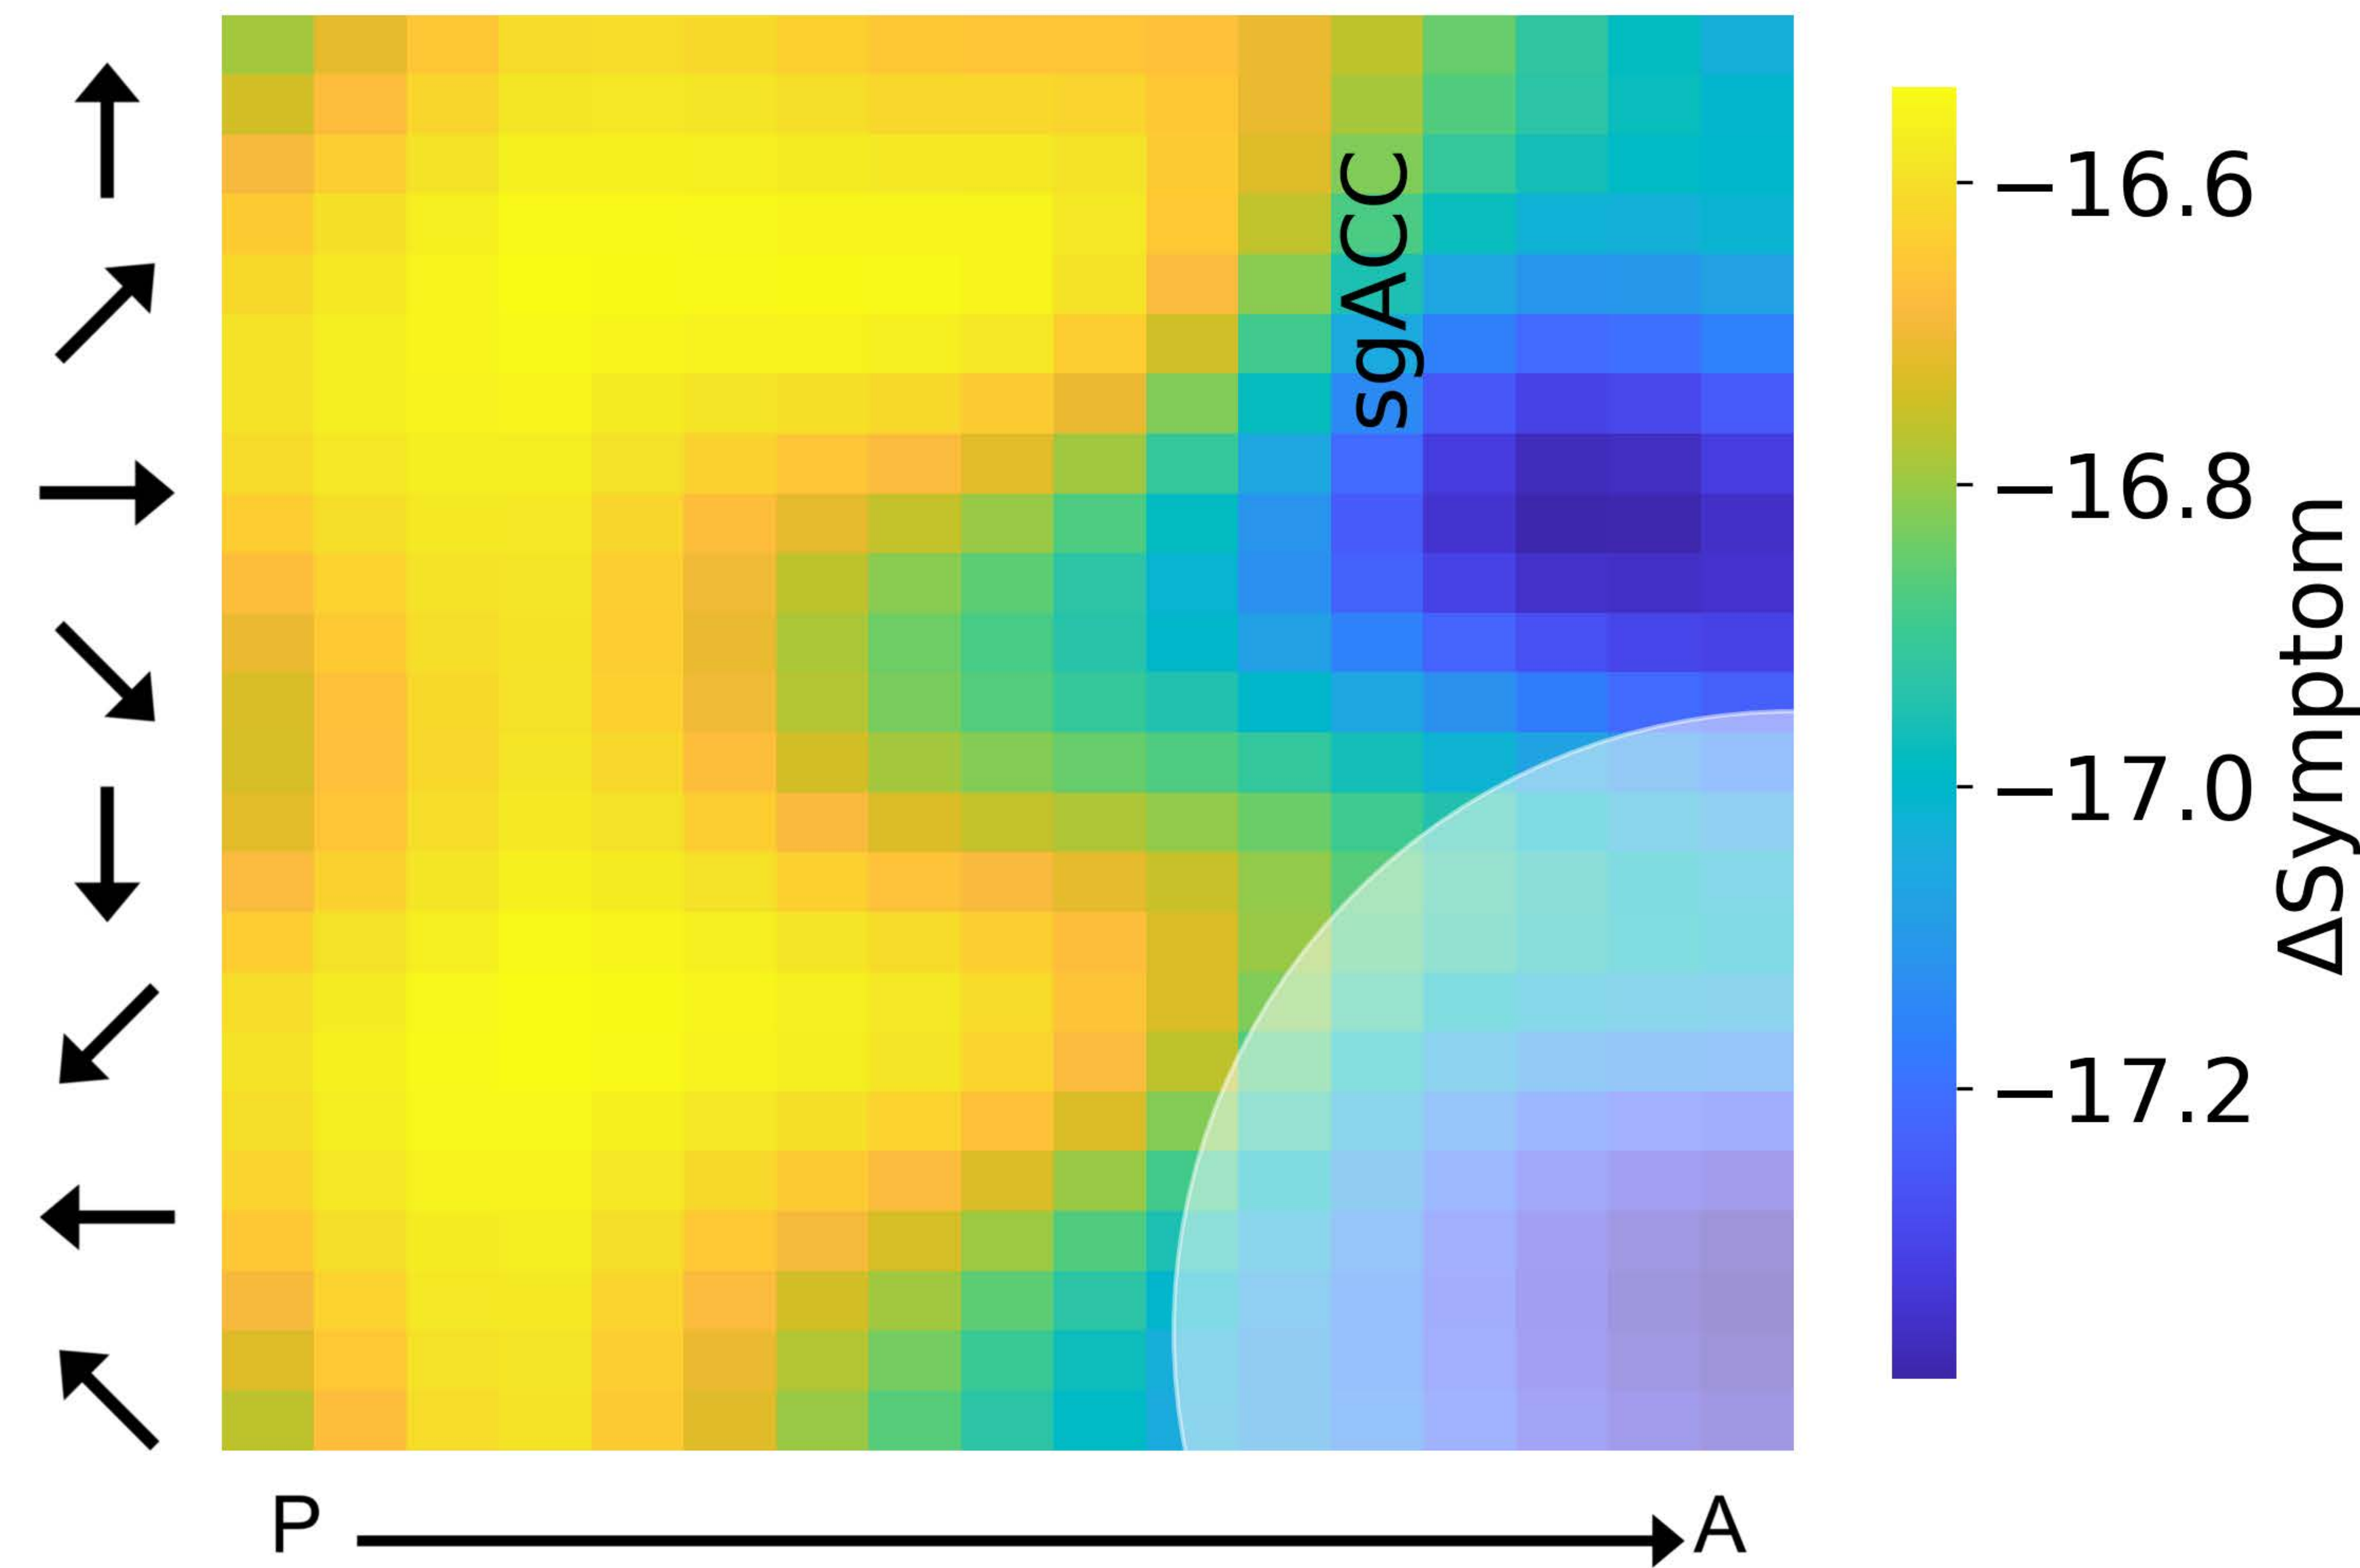



# NDARNZ824XHB\_madrs\_right\_dlpfc

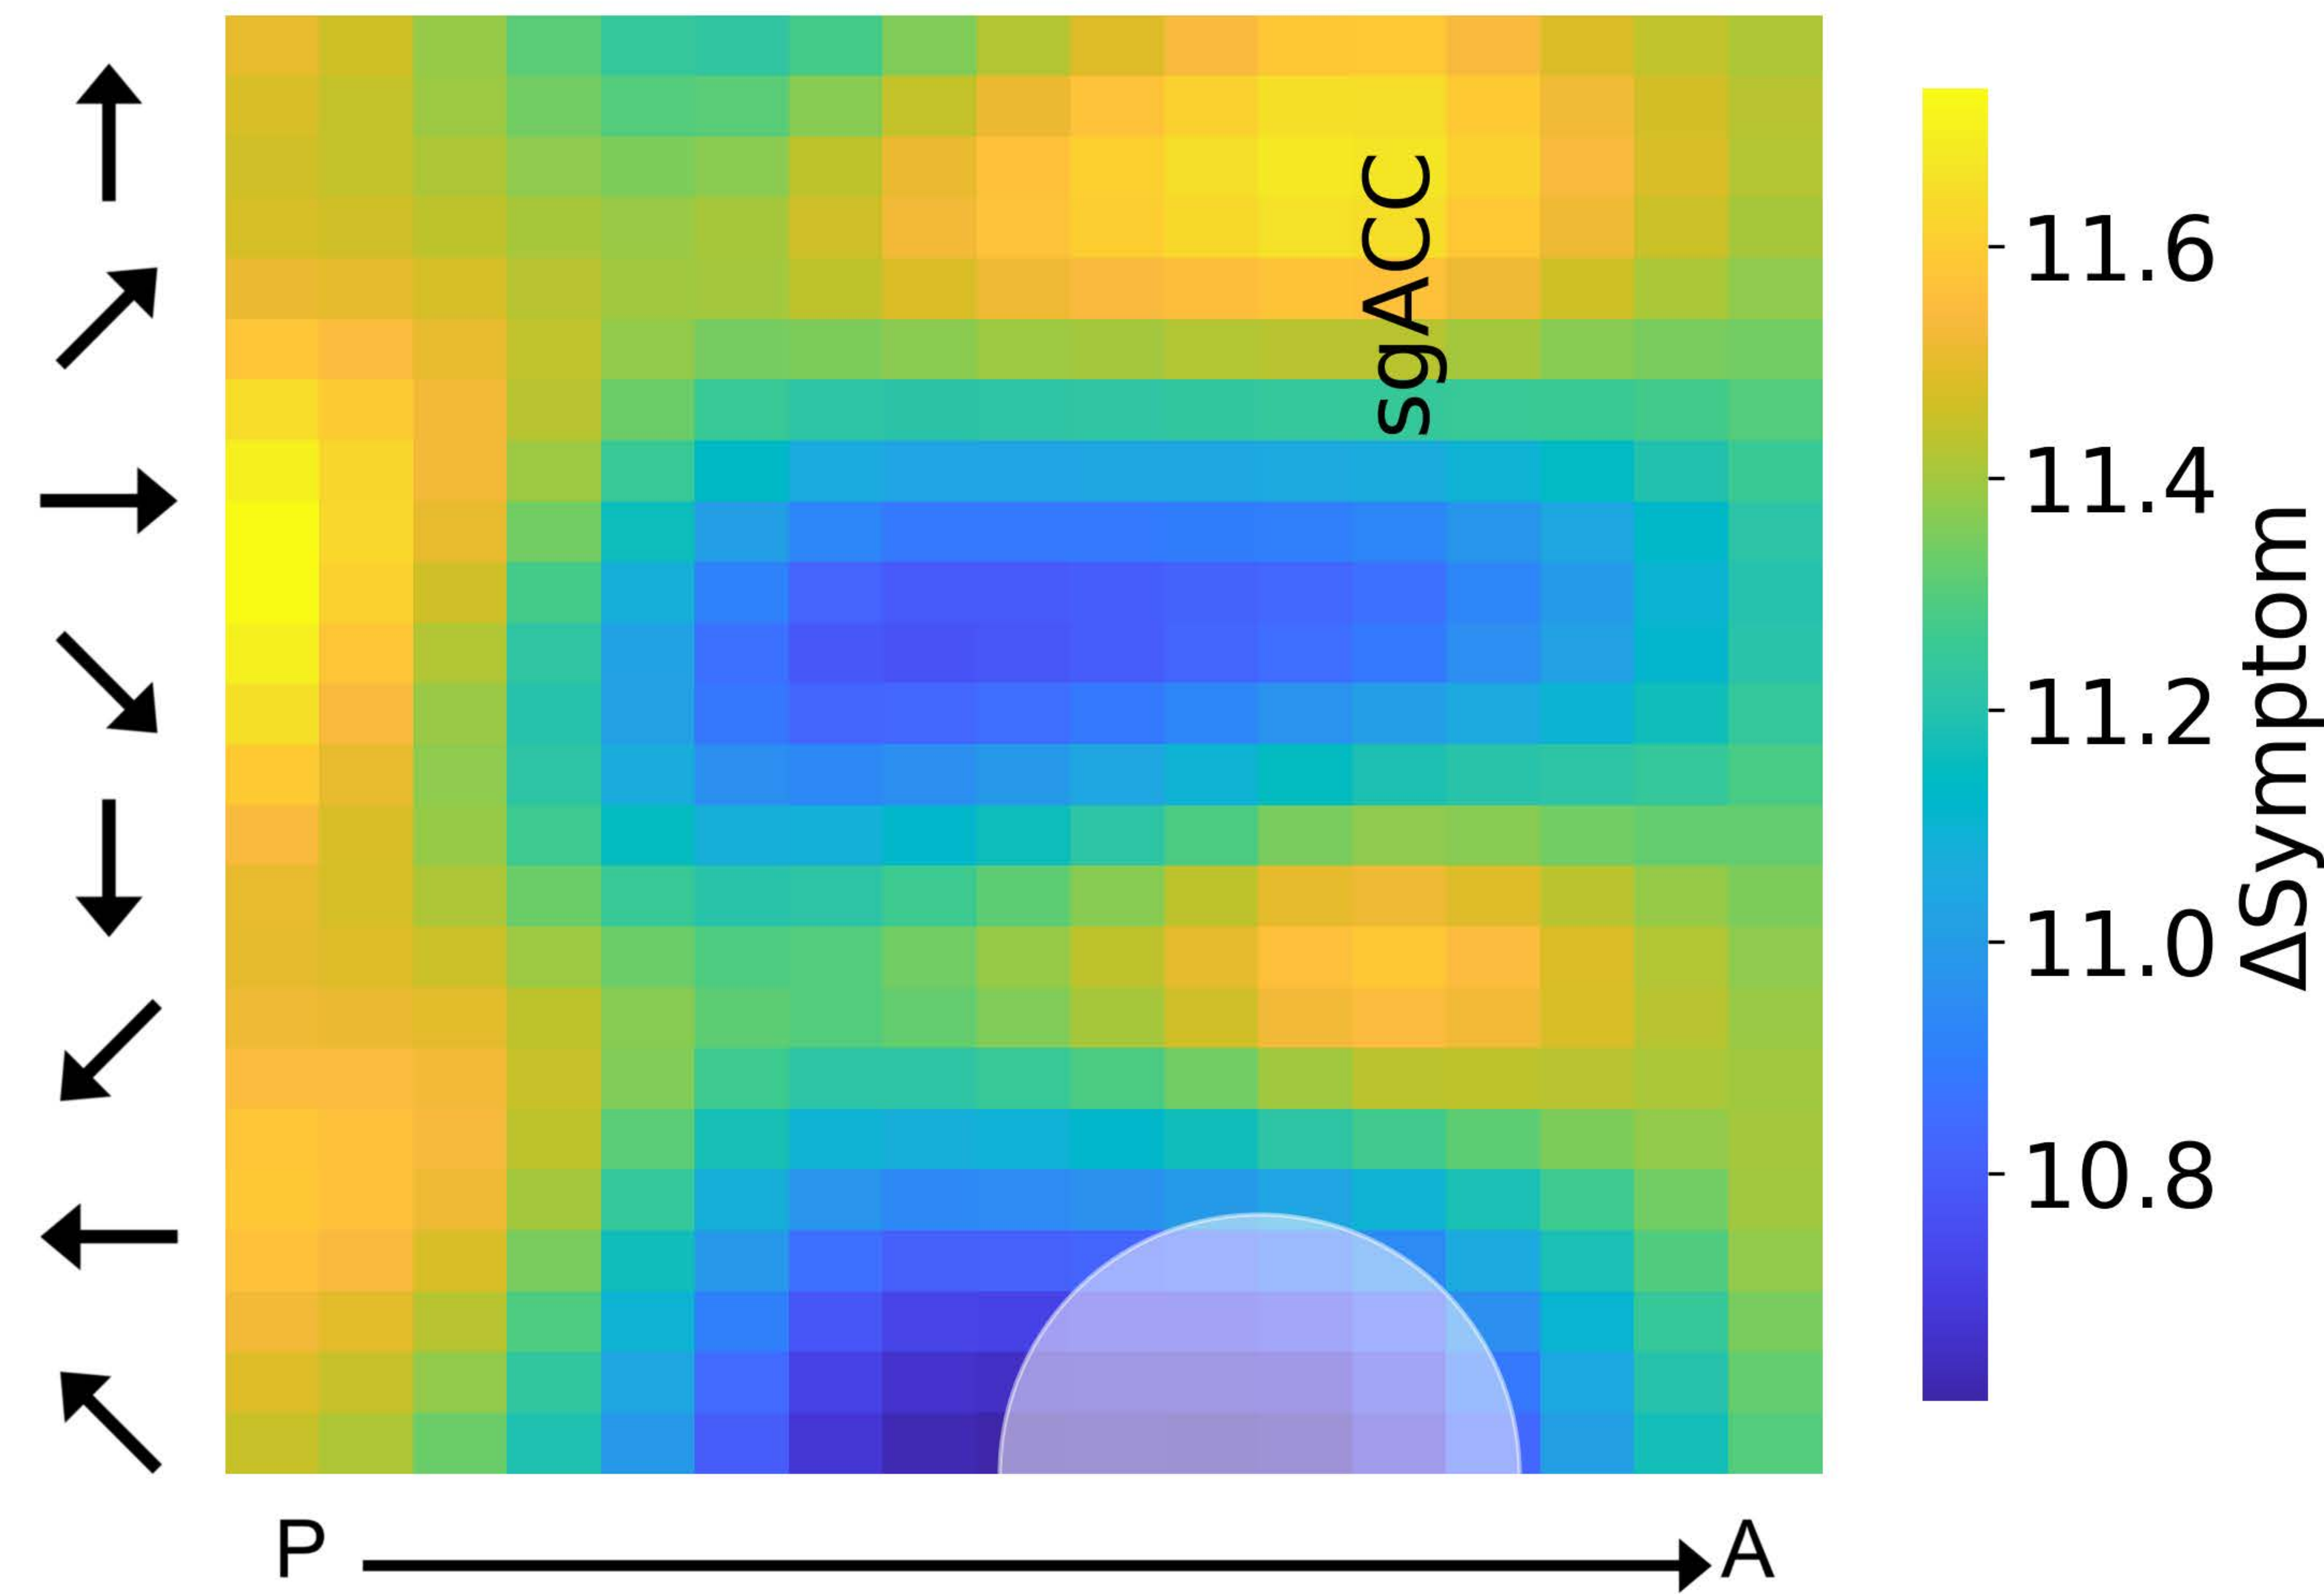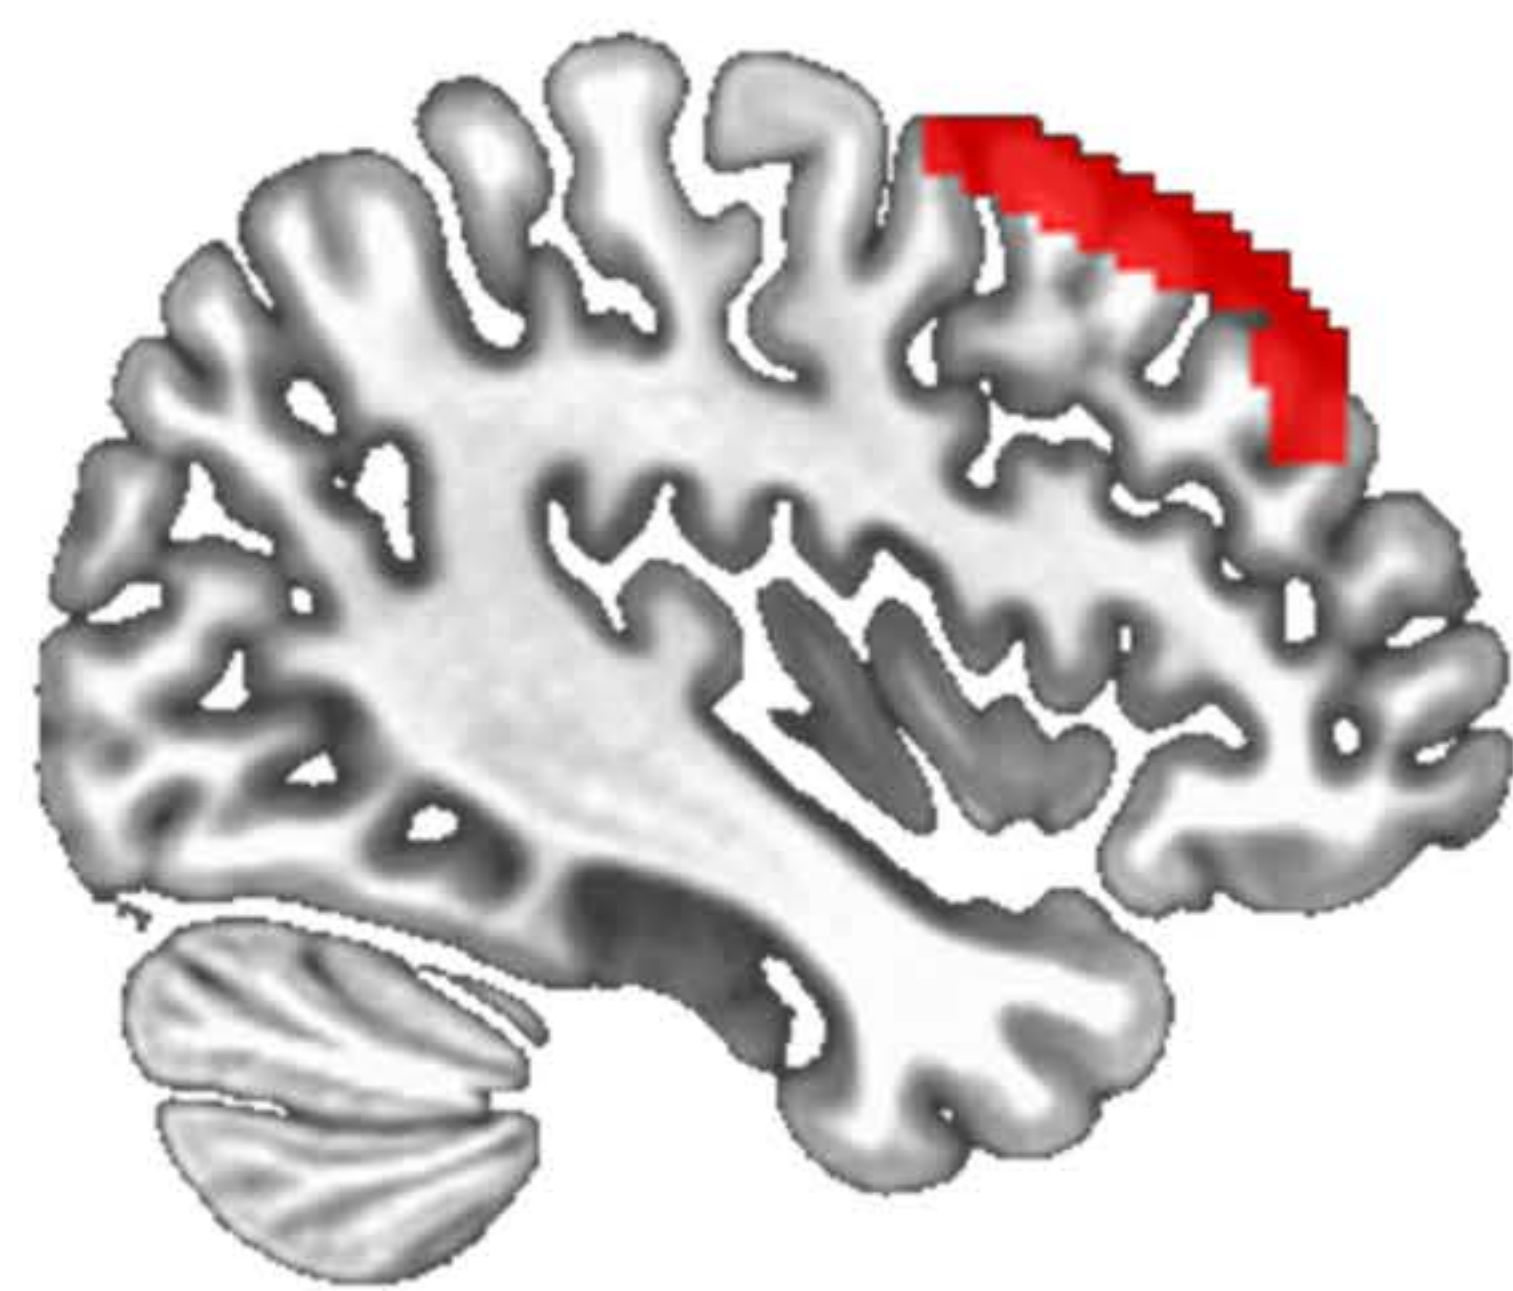



# NDARPA762UGZ\_madrs\_right\_dlpfc

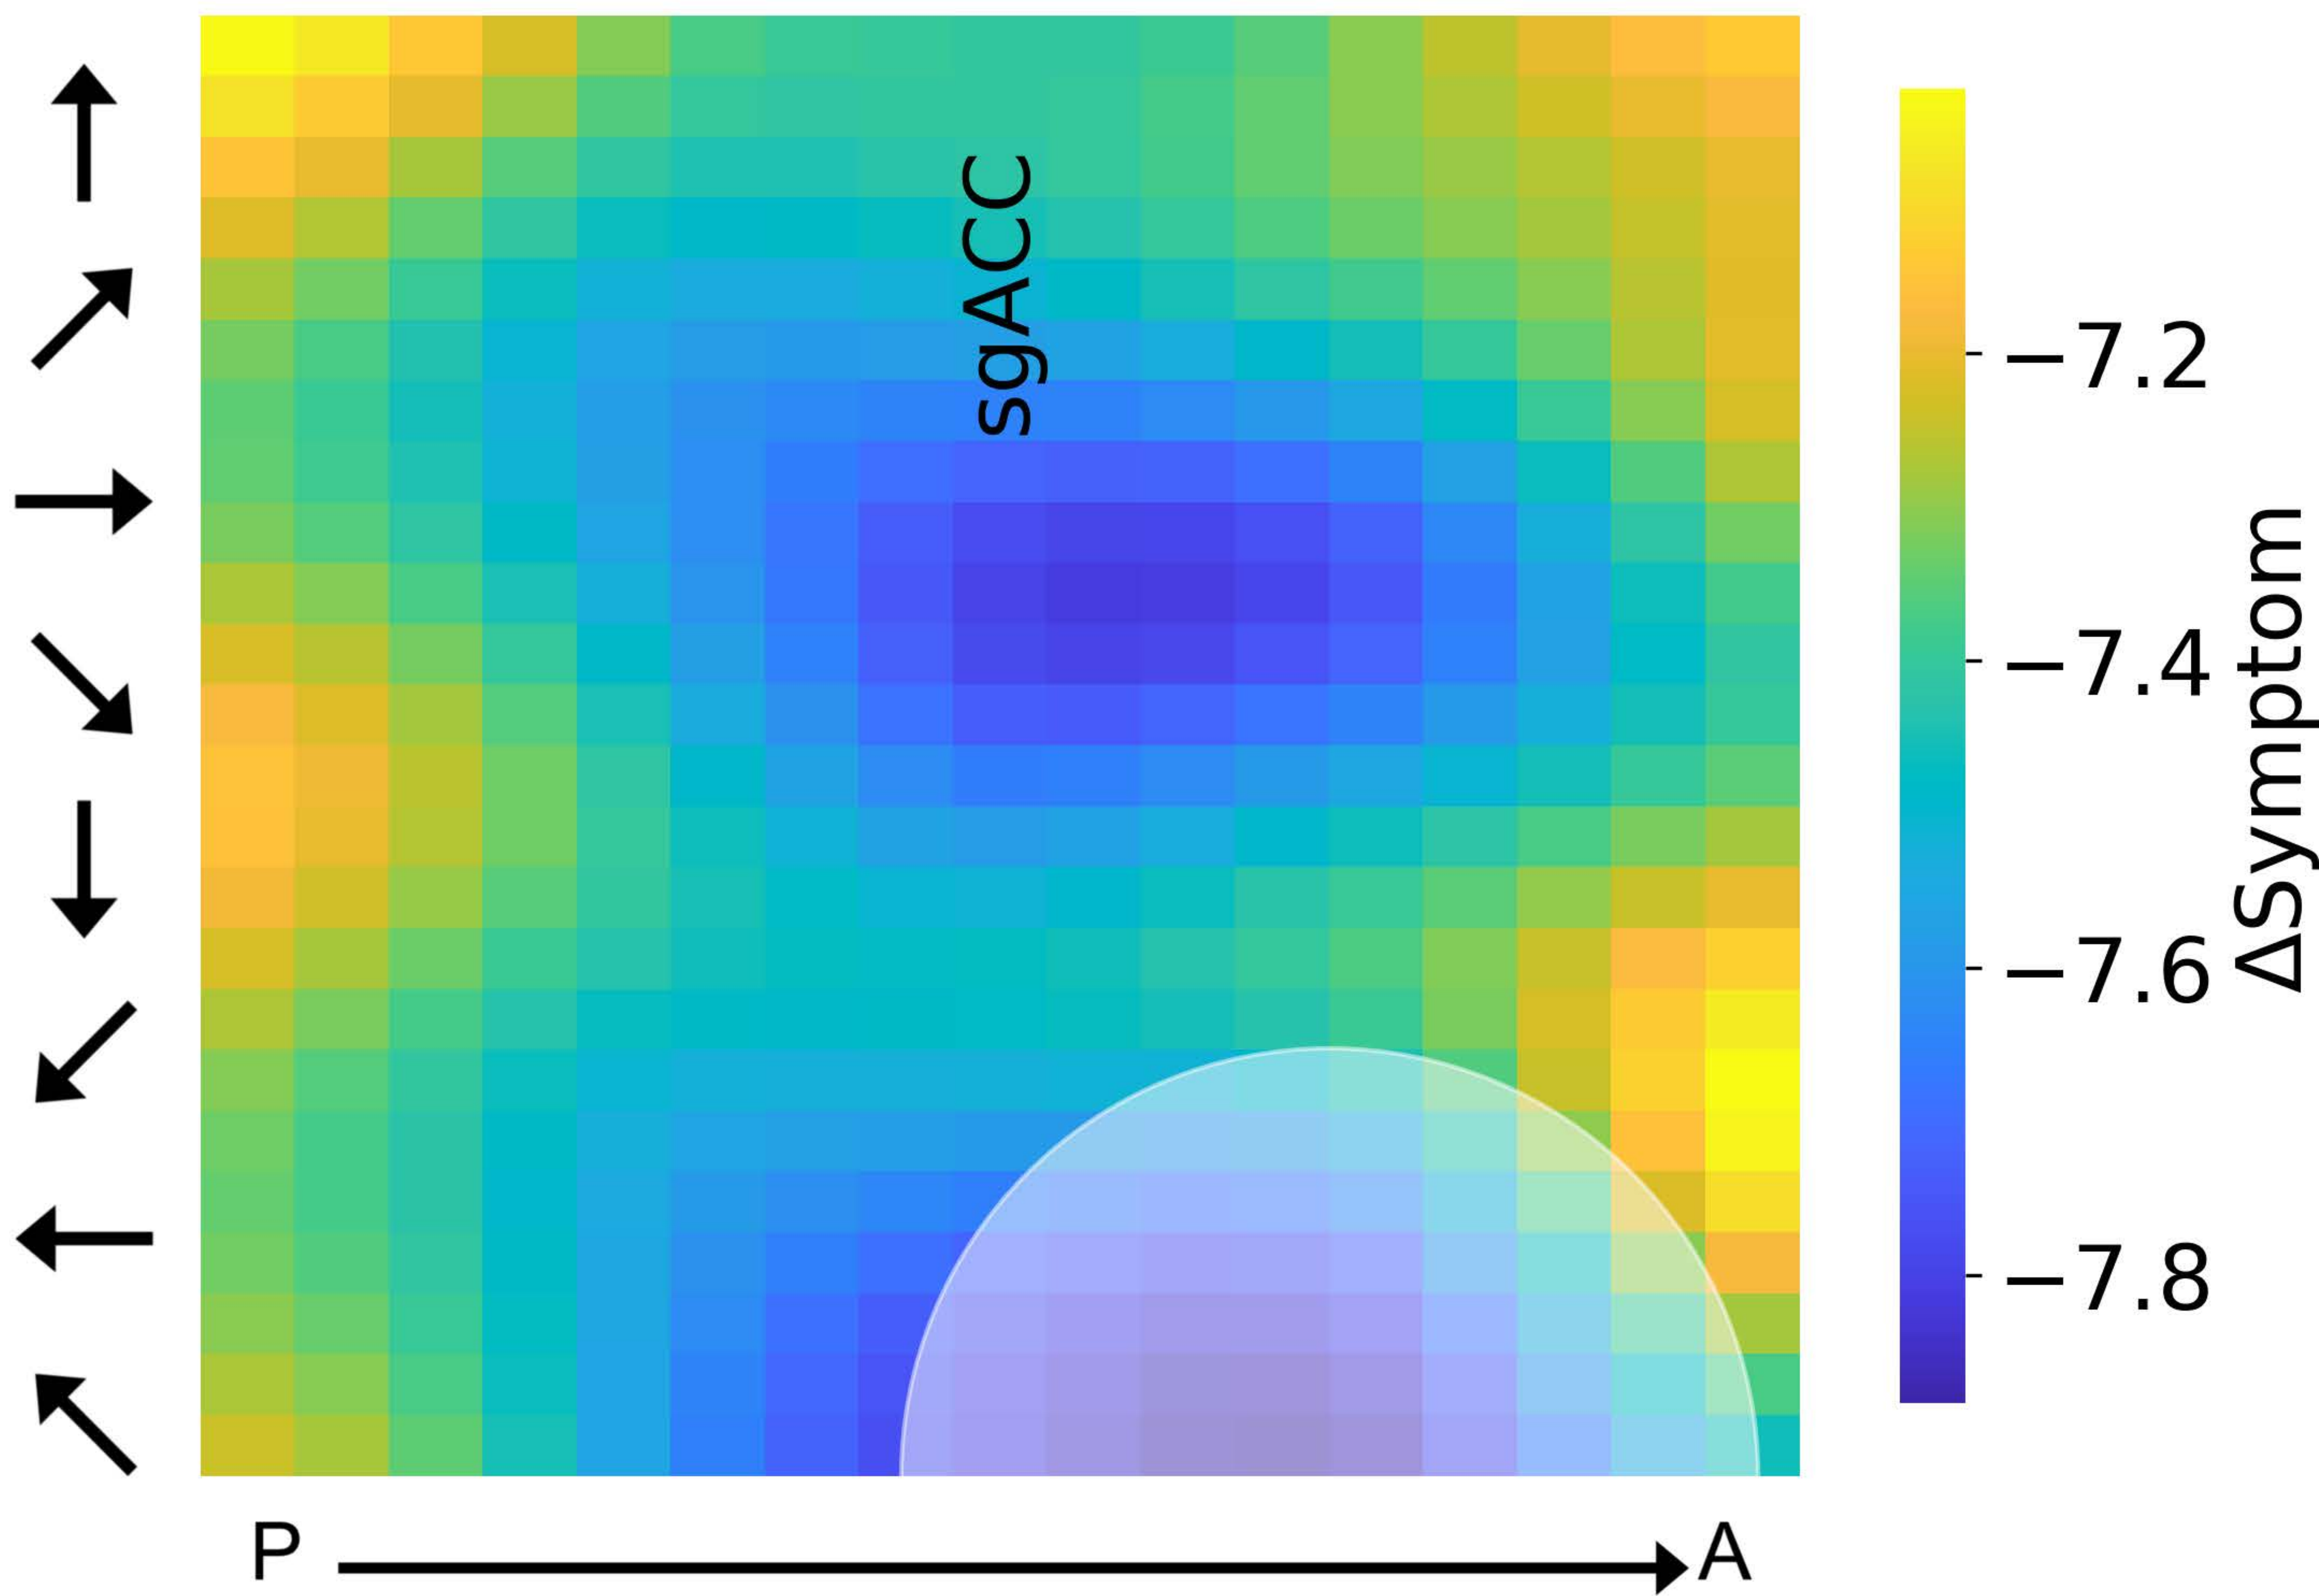



# NDARPC197VR3\_madrs\_right\_dlpfc

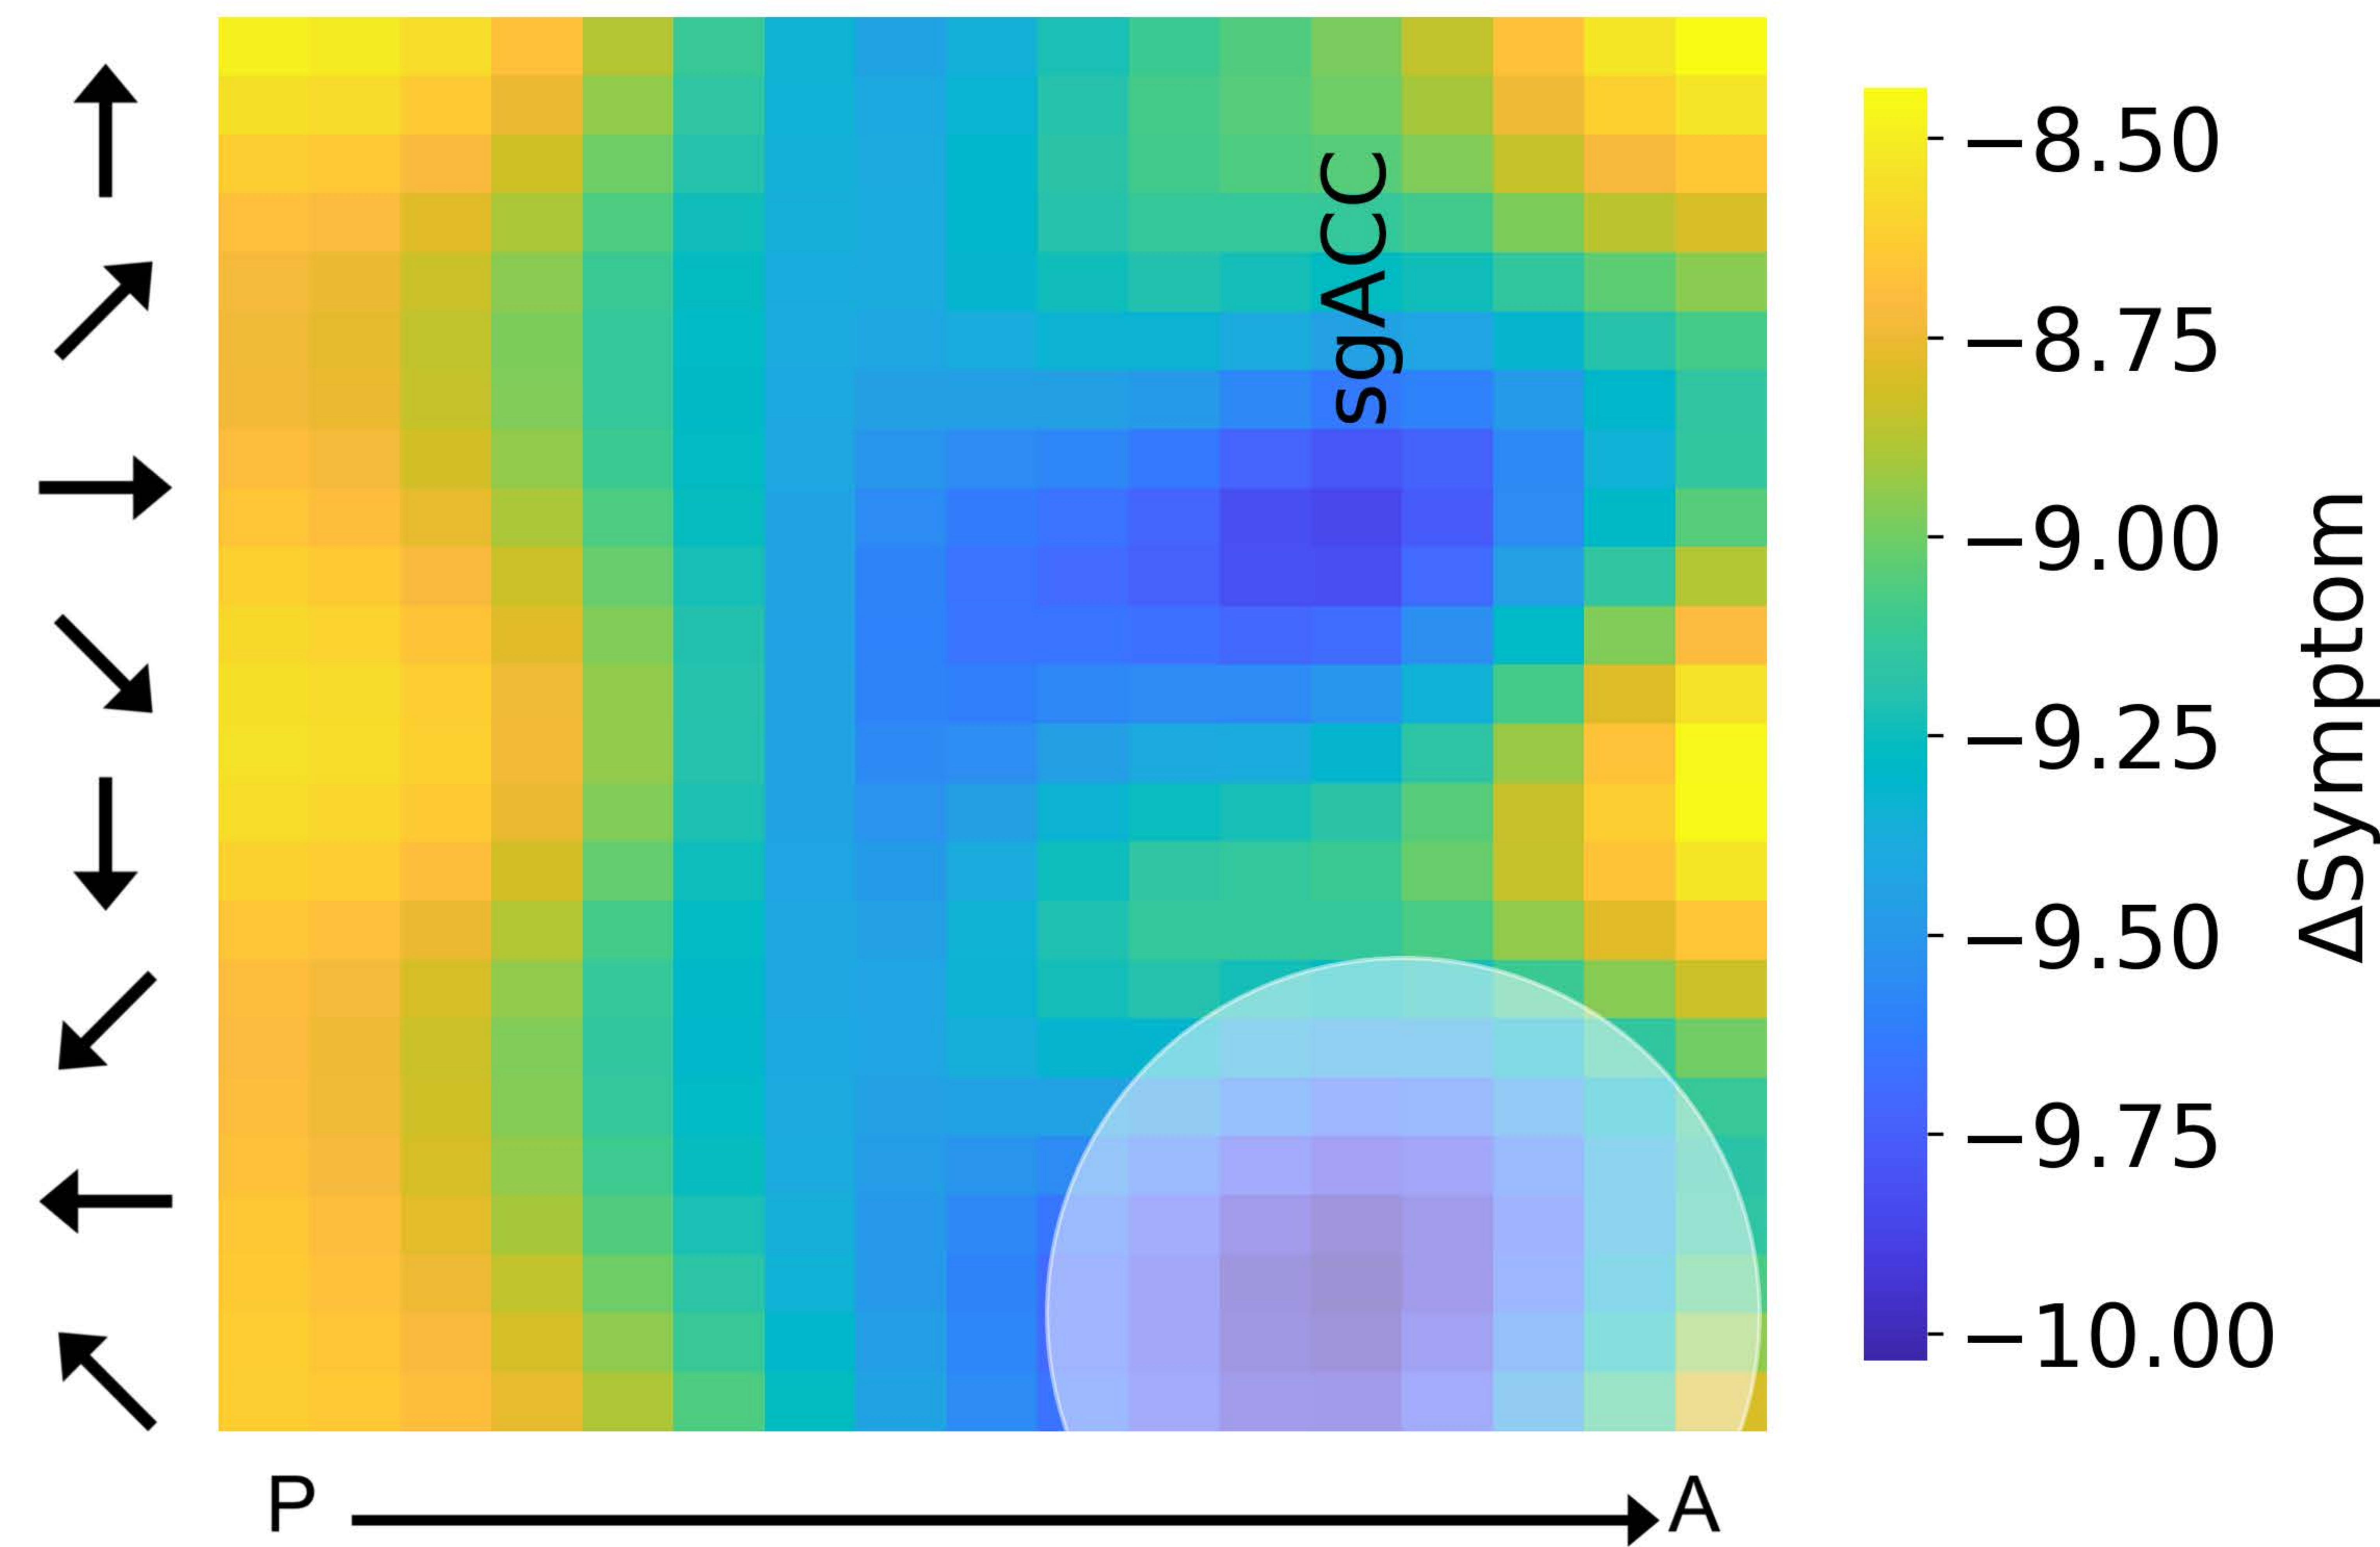



# INDARPF499HVH\_madrs\_right\_dlpfc

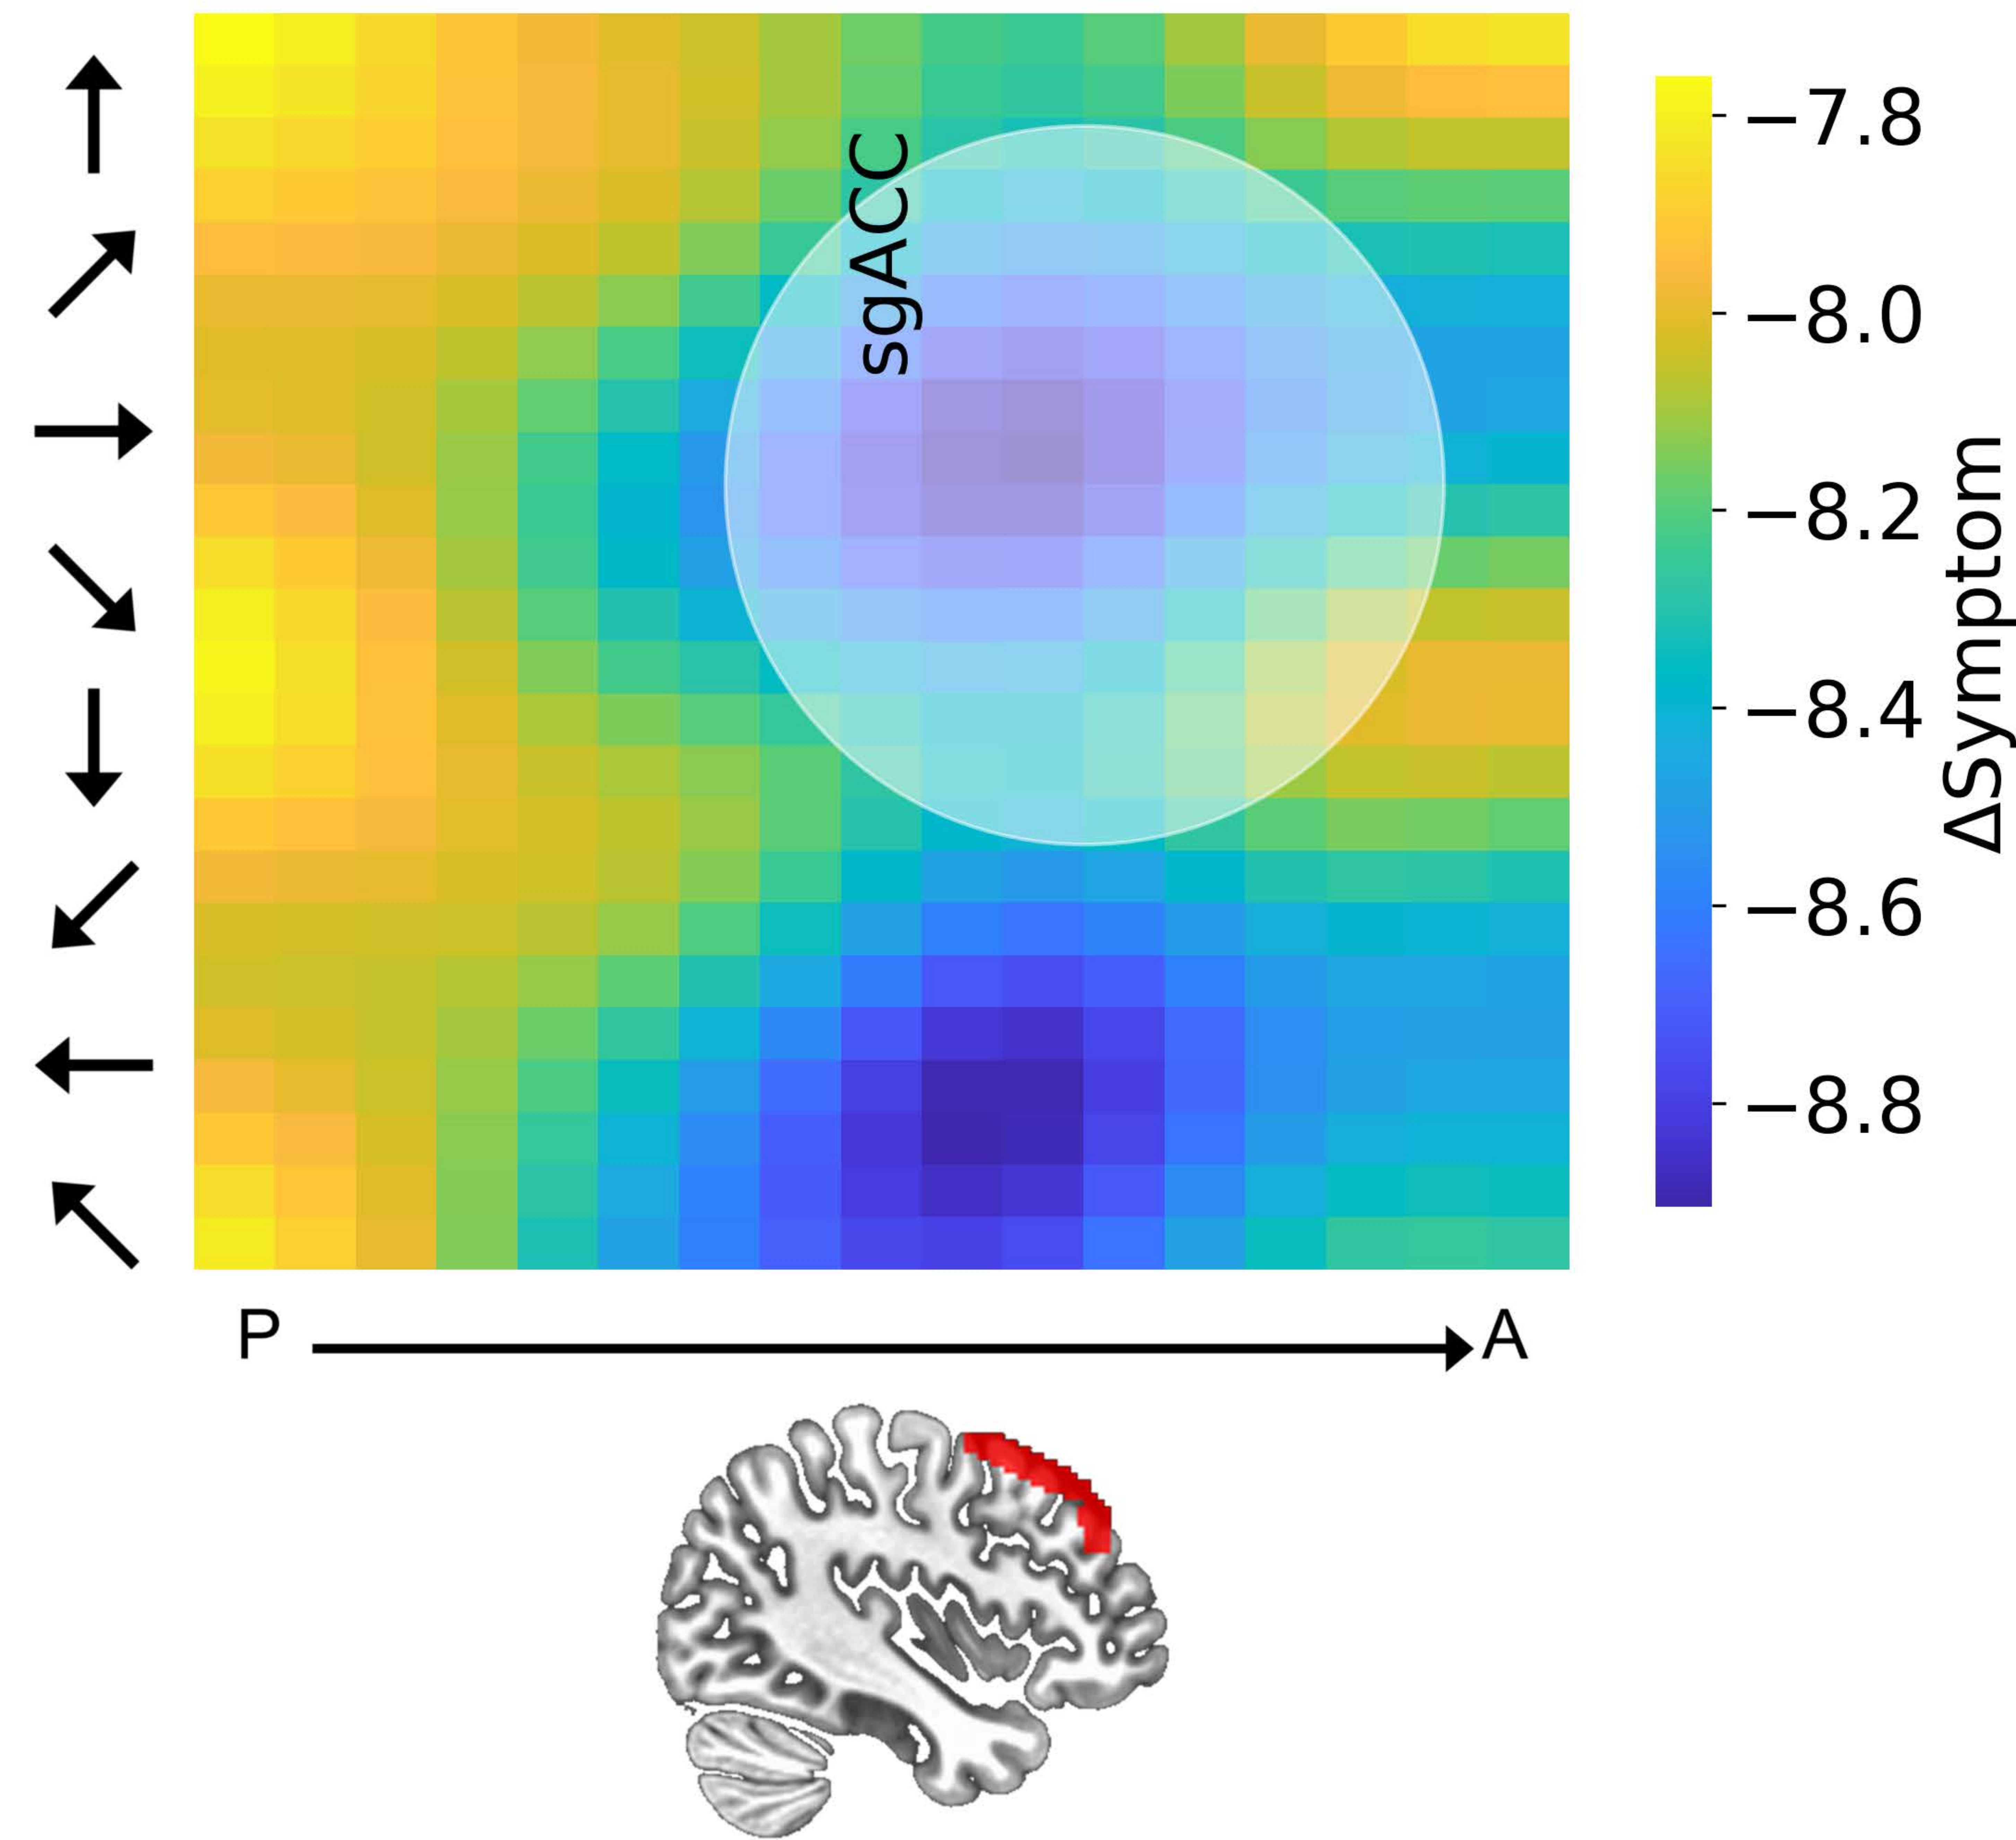



# INDARPK811MVW\_madrs\_right\_dlpfc

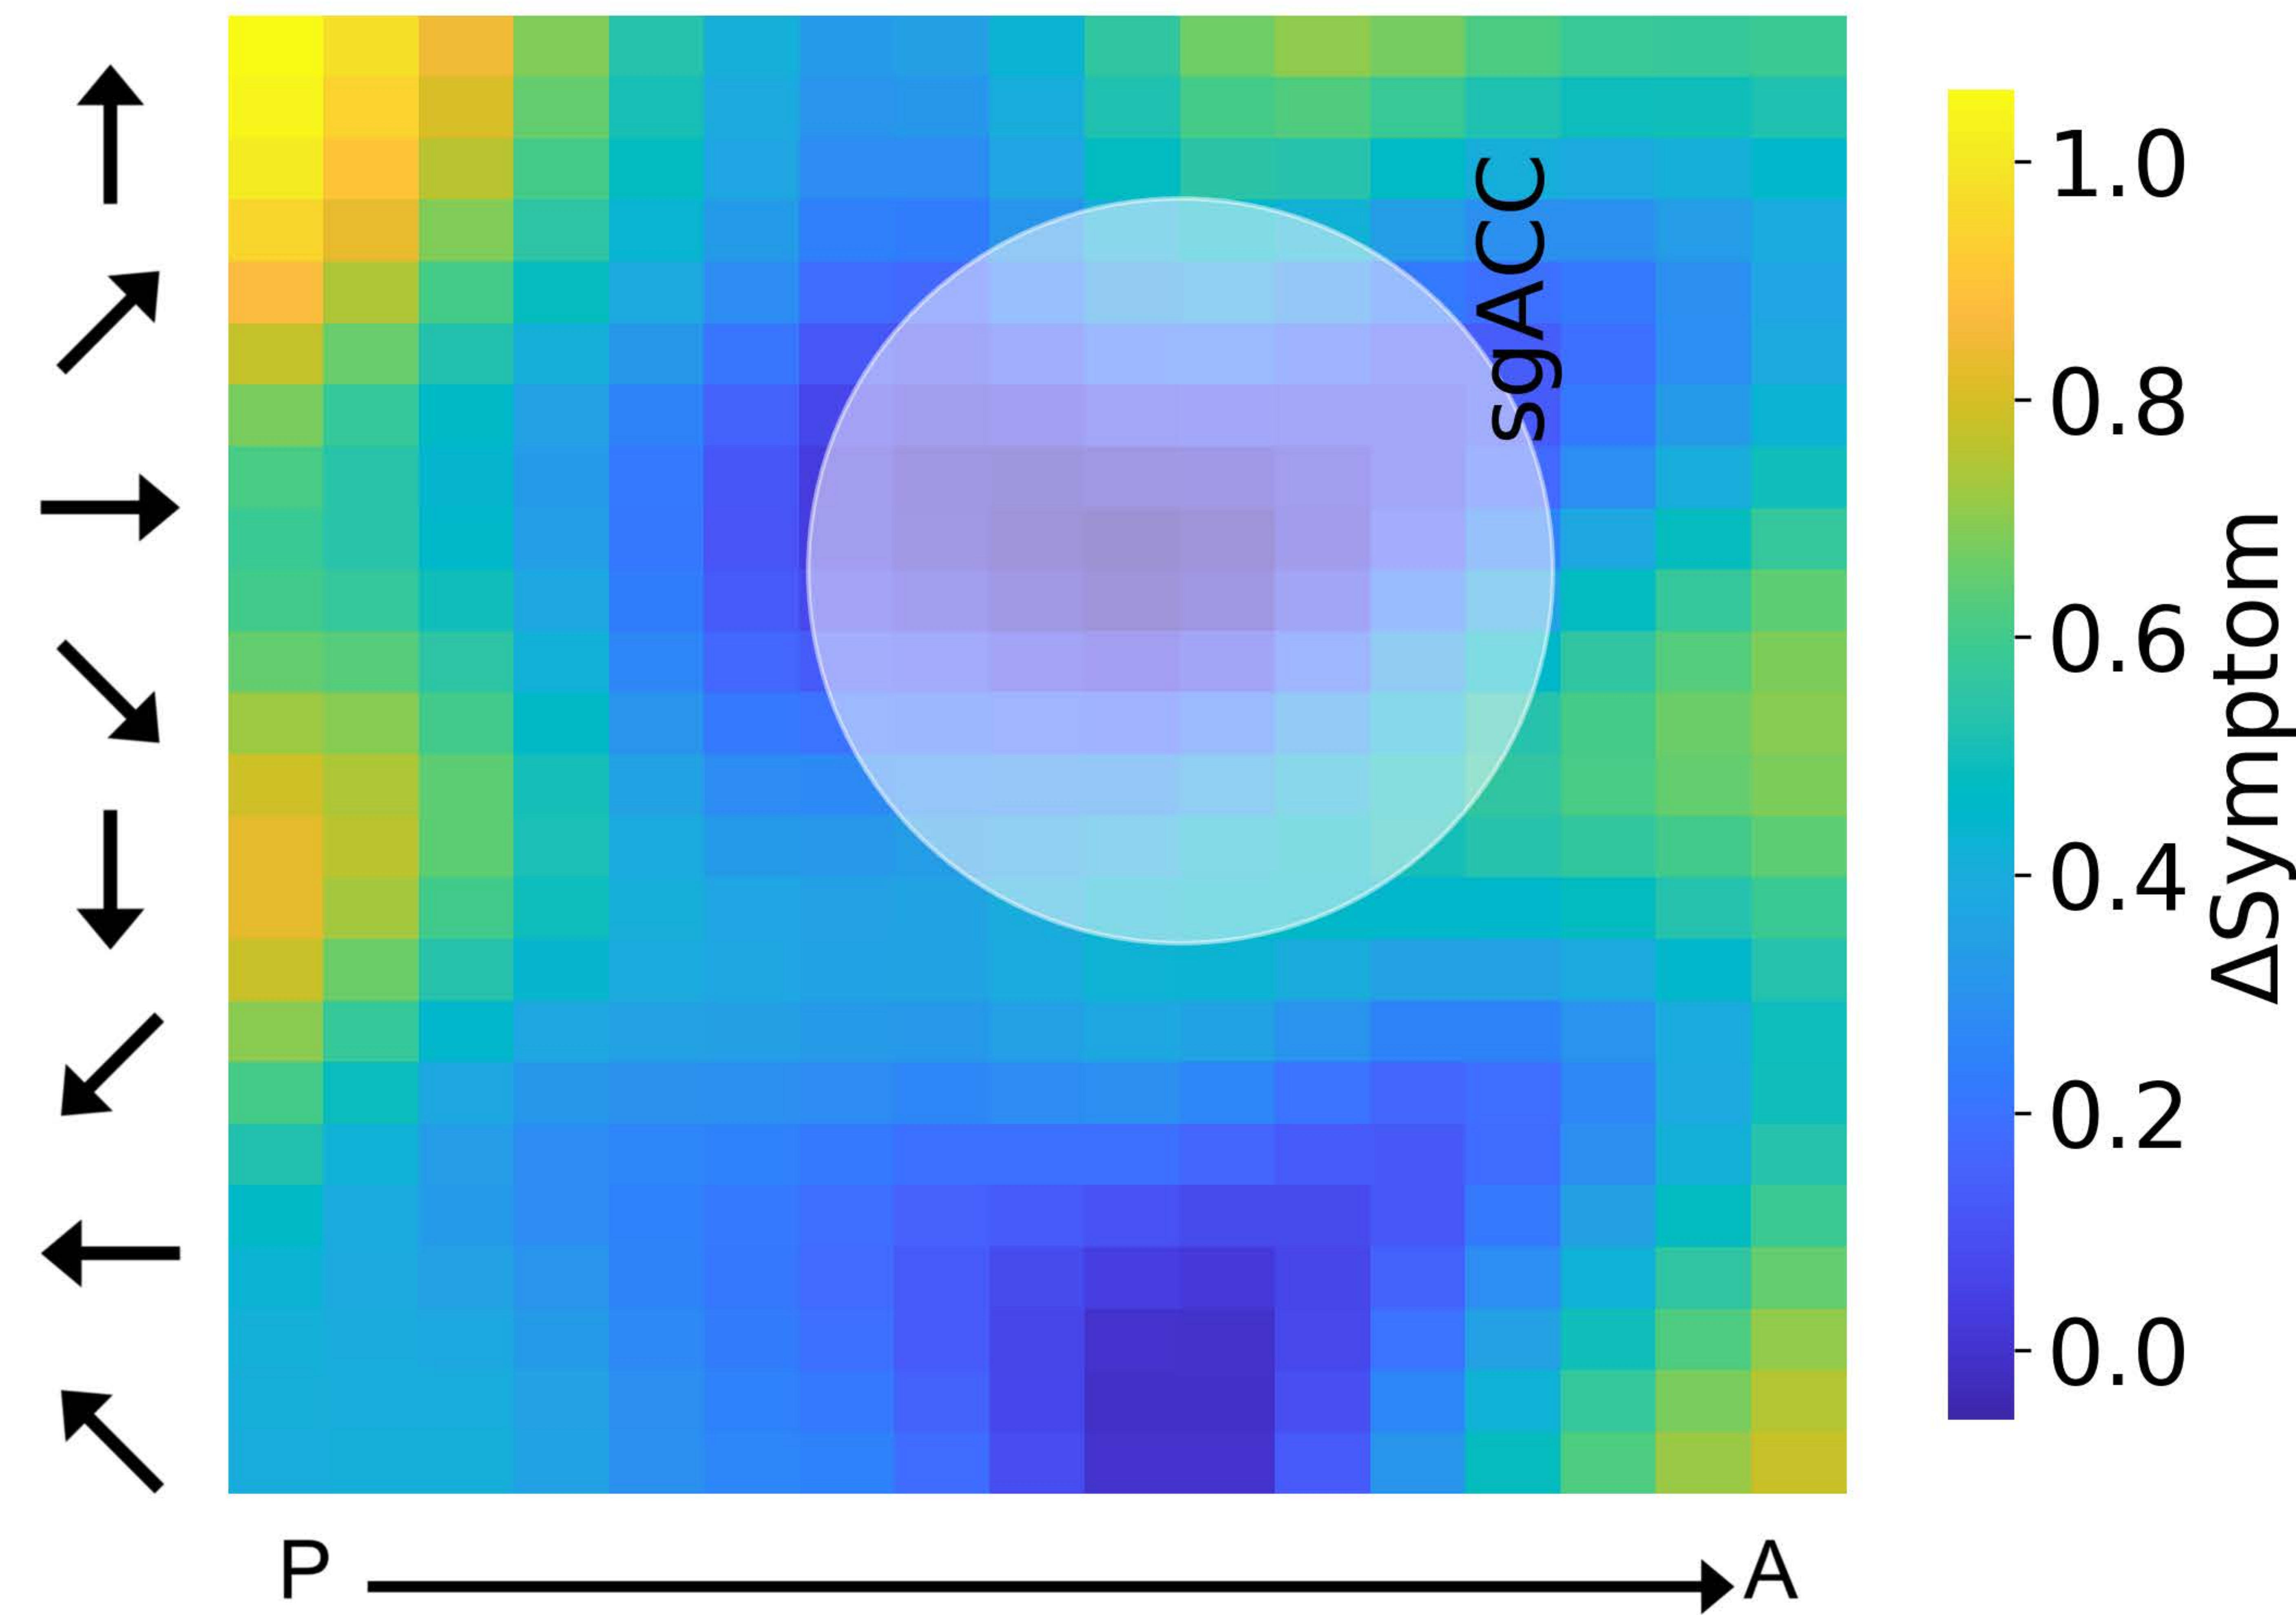



# NDARPT040EGR\_madrs\_right\_dlpfc

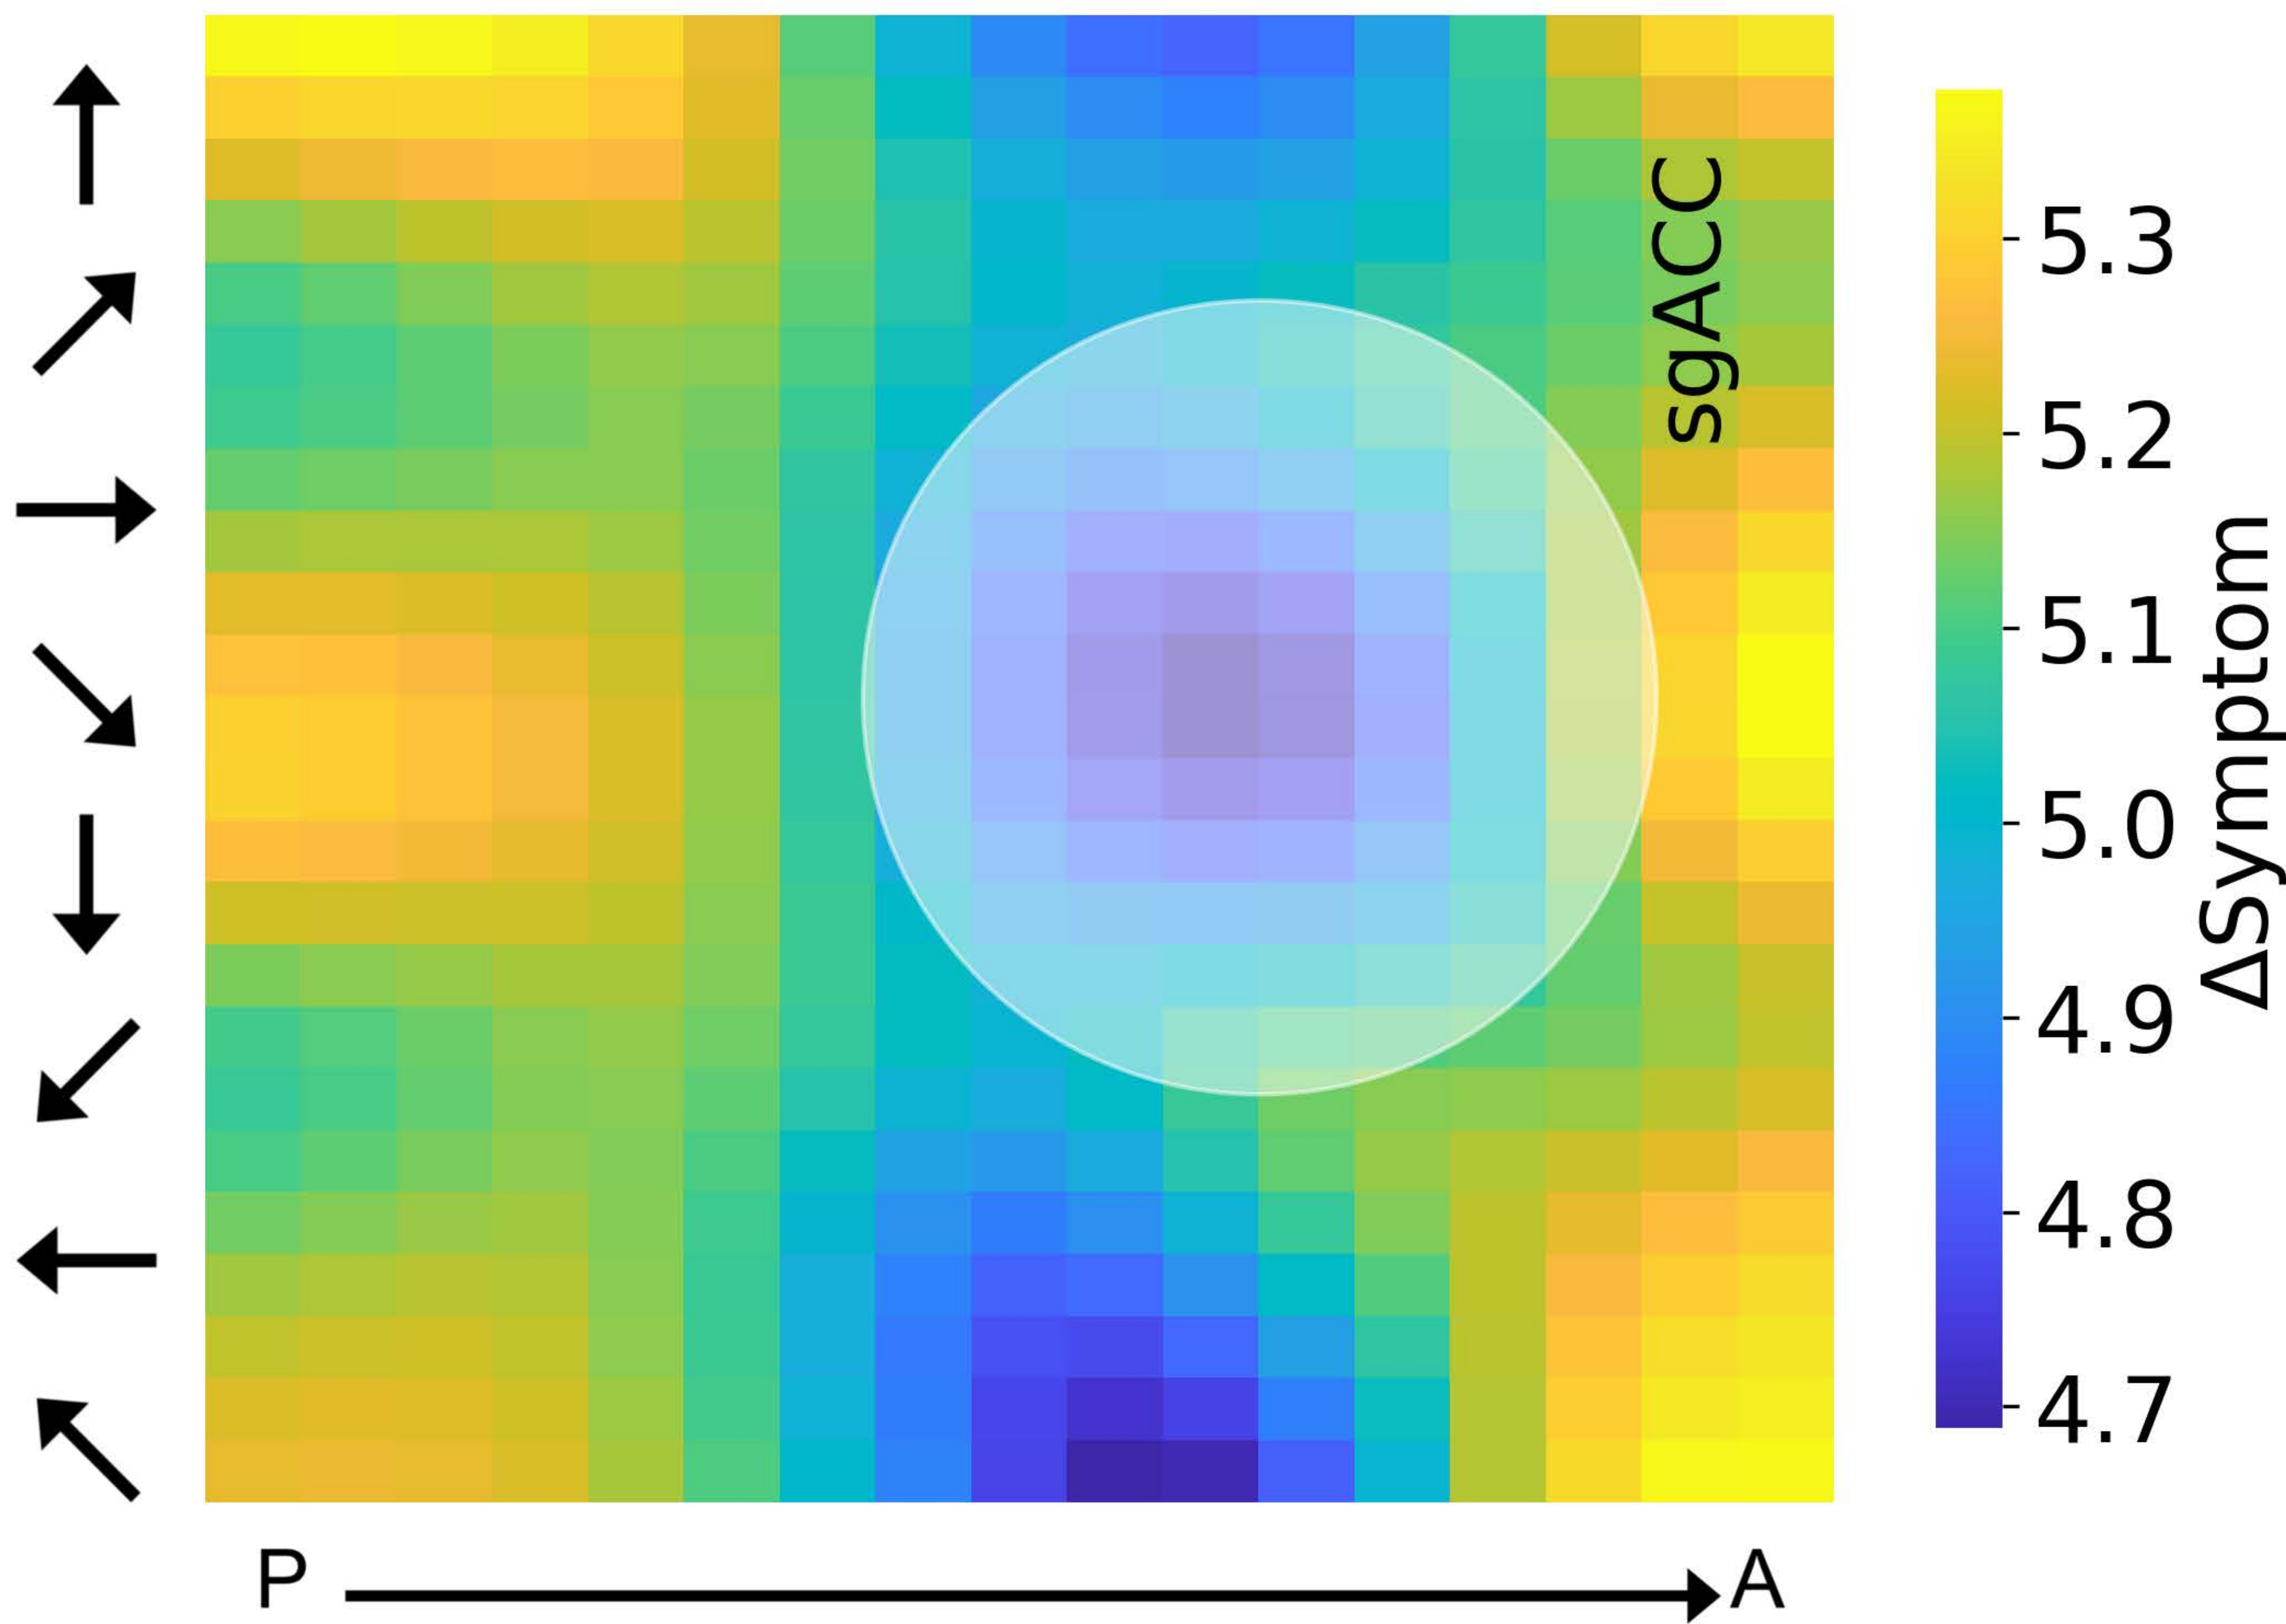



# NDARPW706YNA\_madrs\_right\_dlpfc

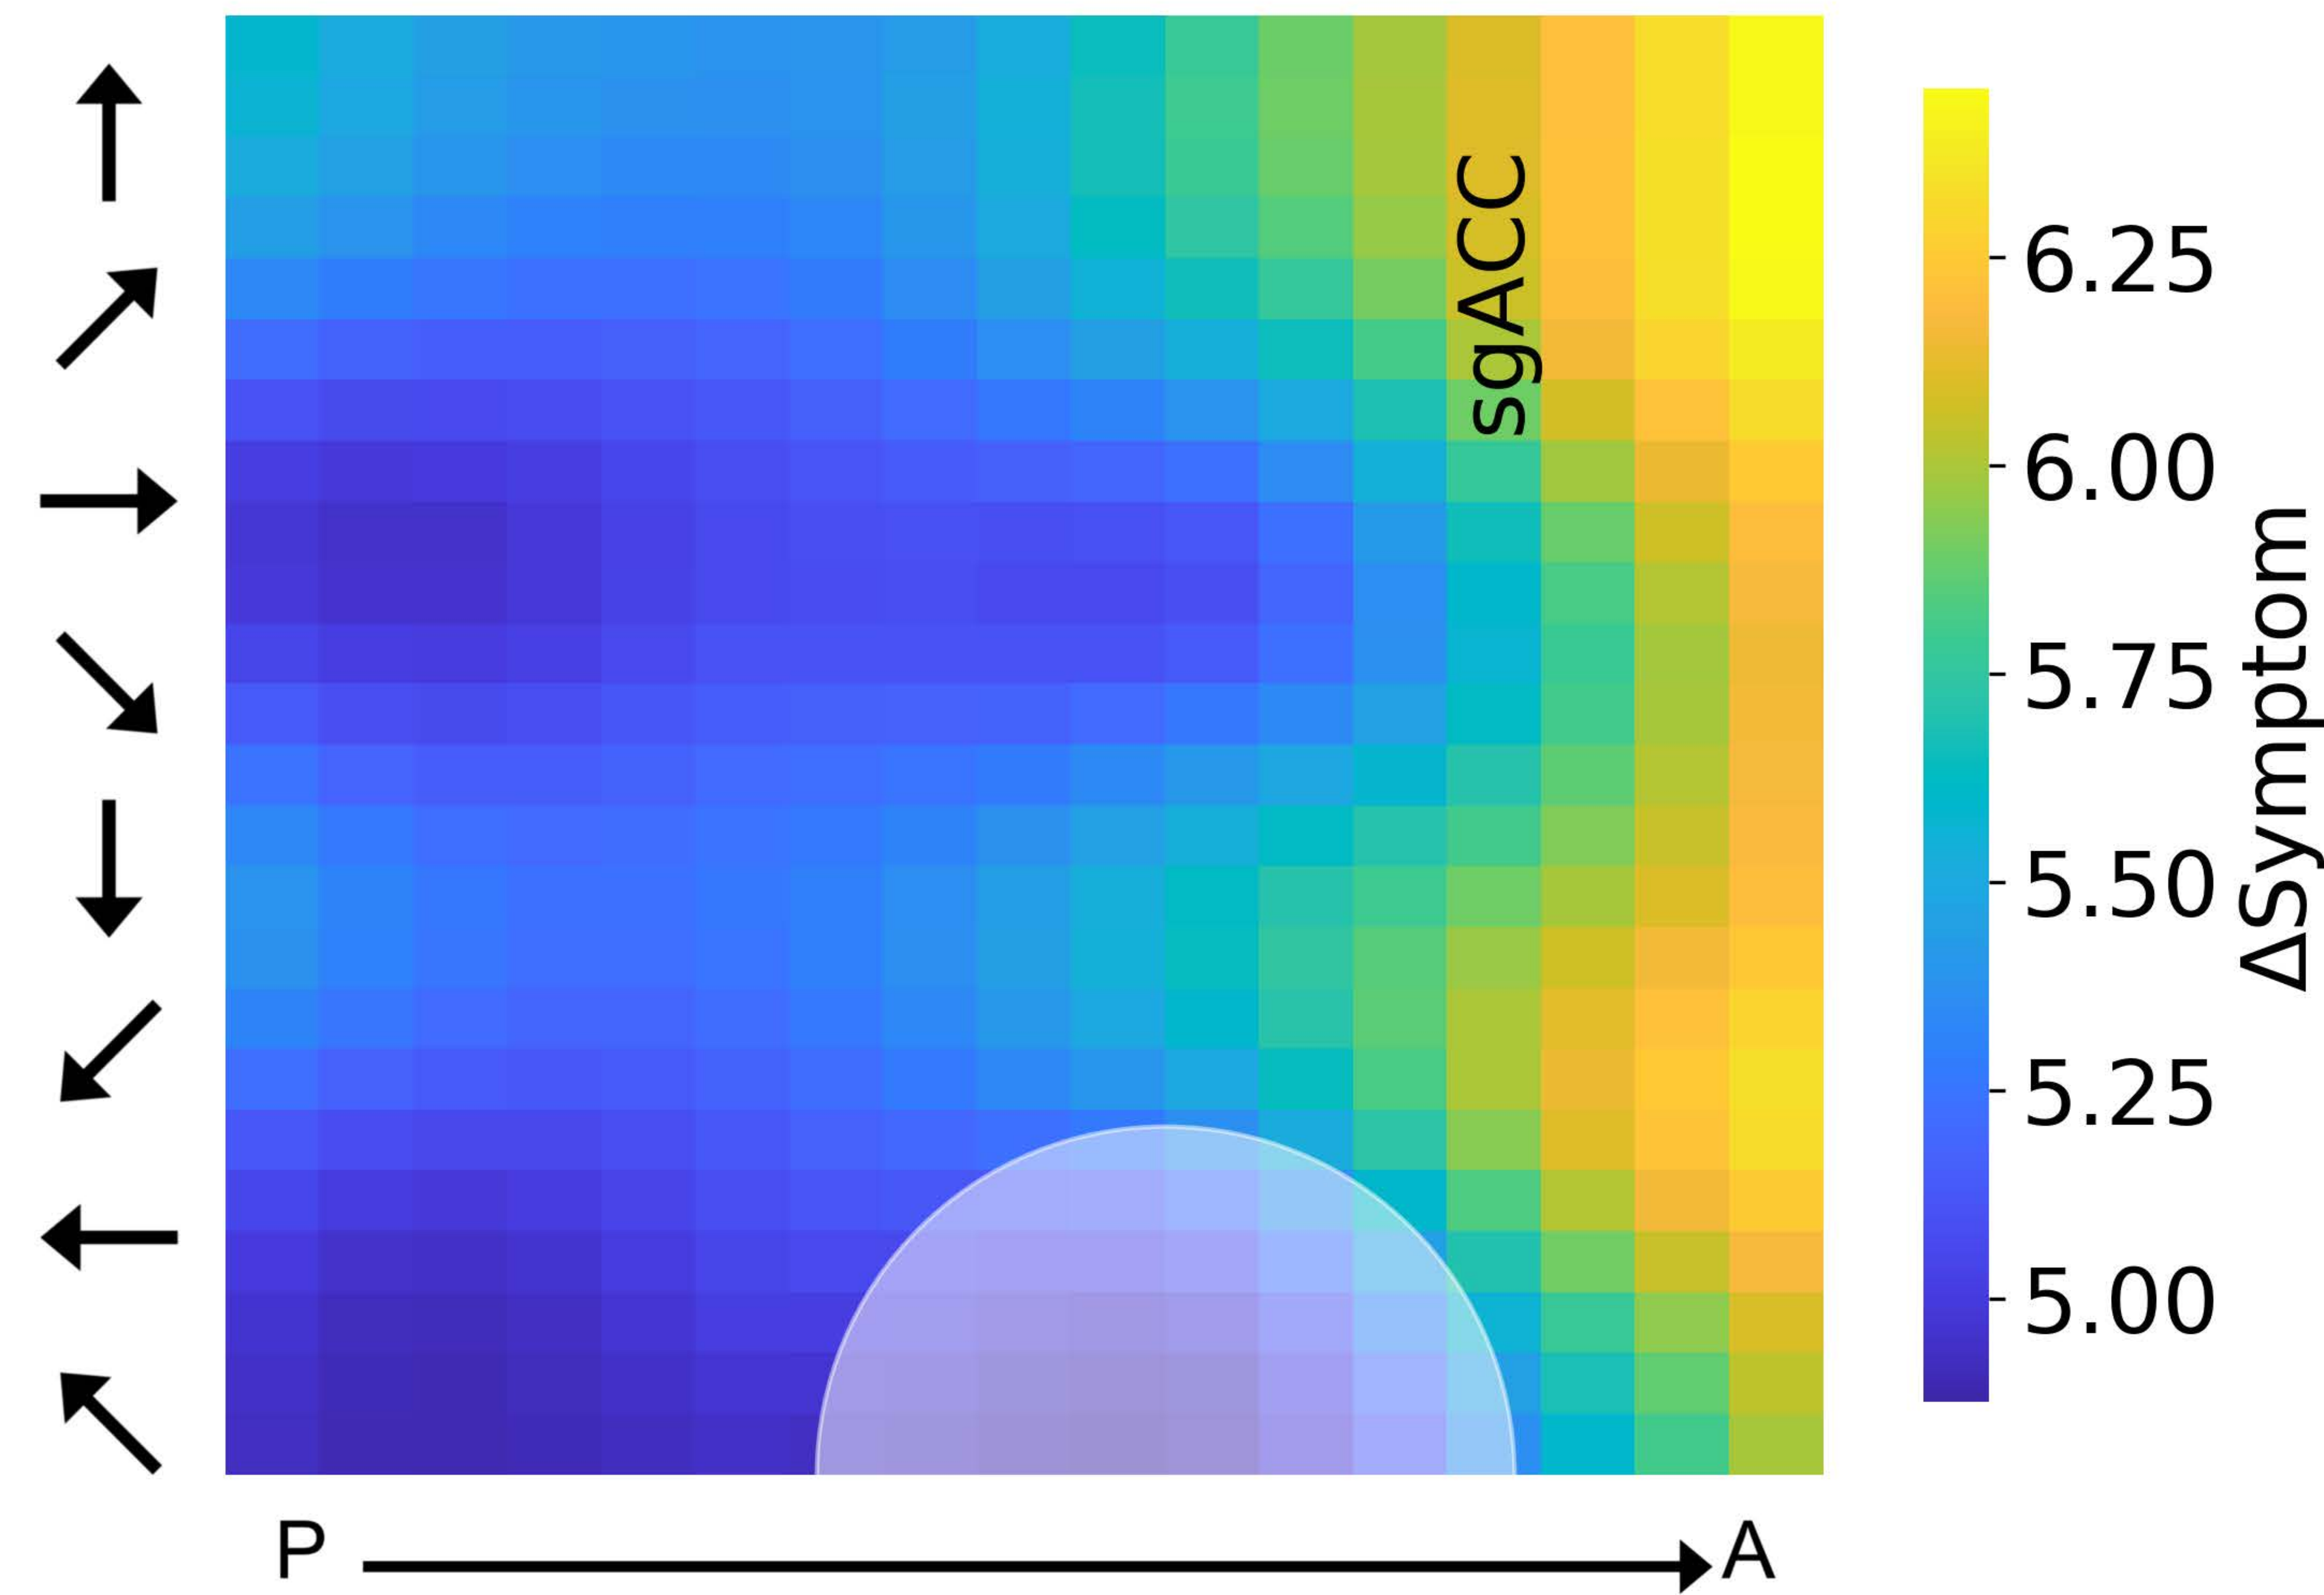



# NDARPZ537YY0\_madrs\_right\_dlpfc

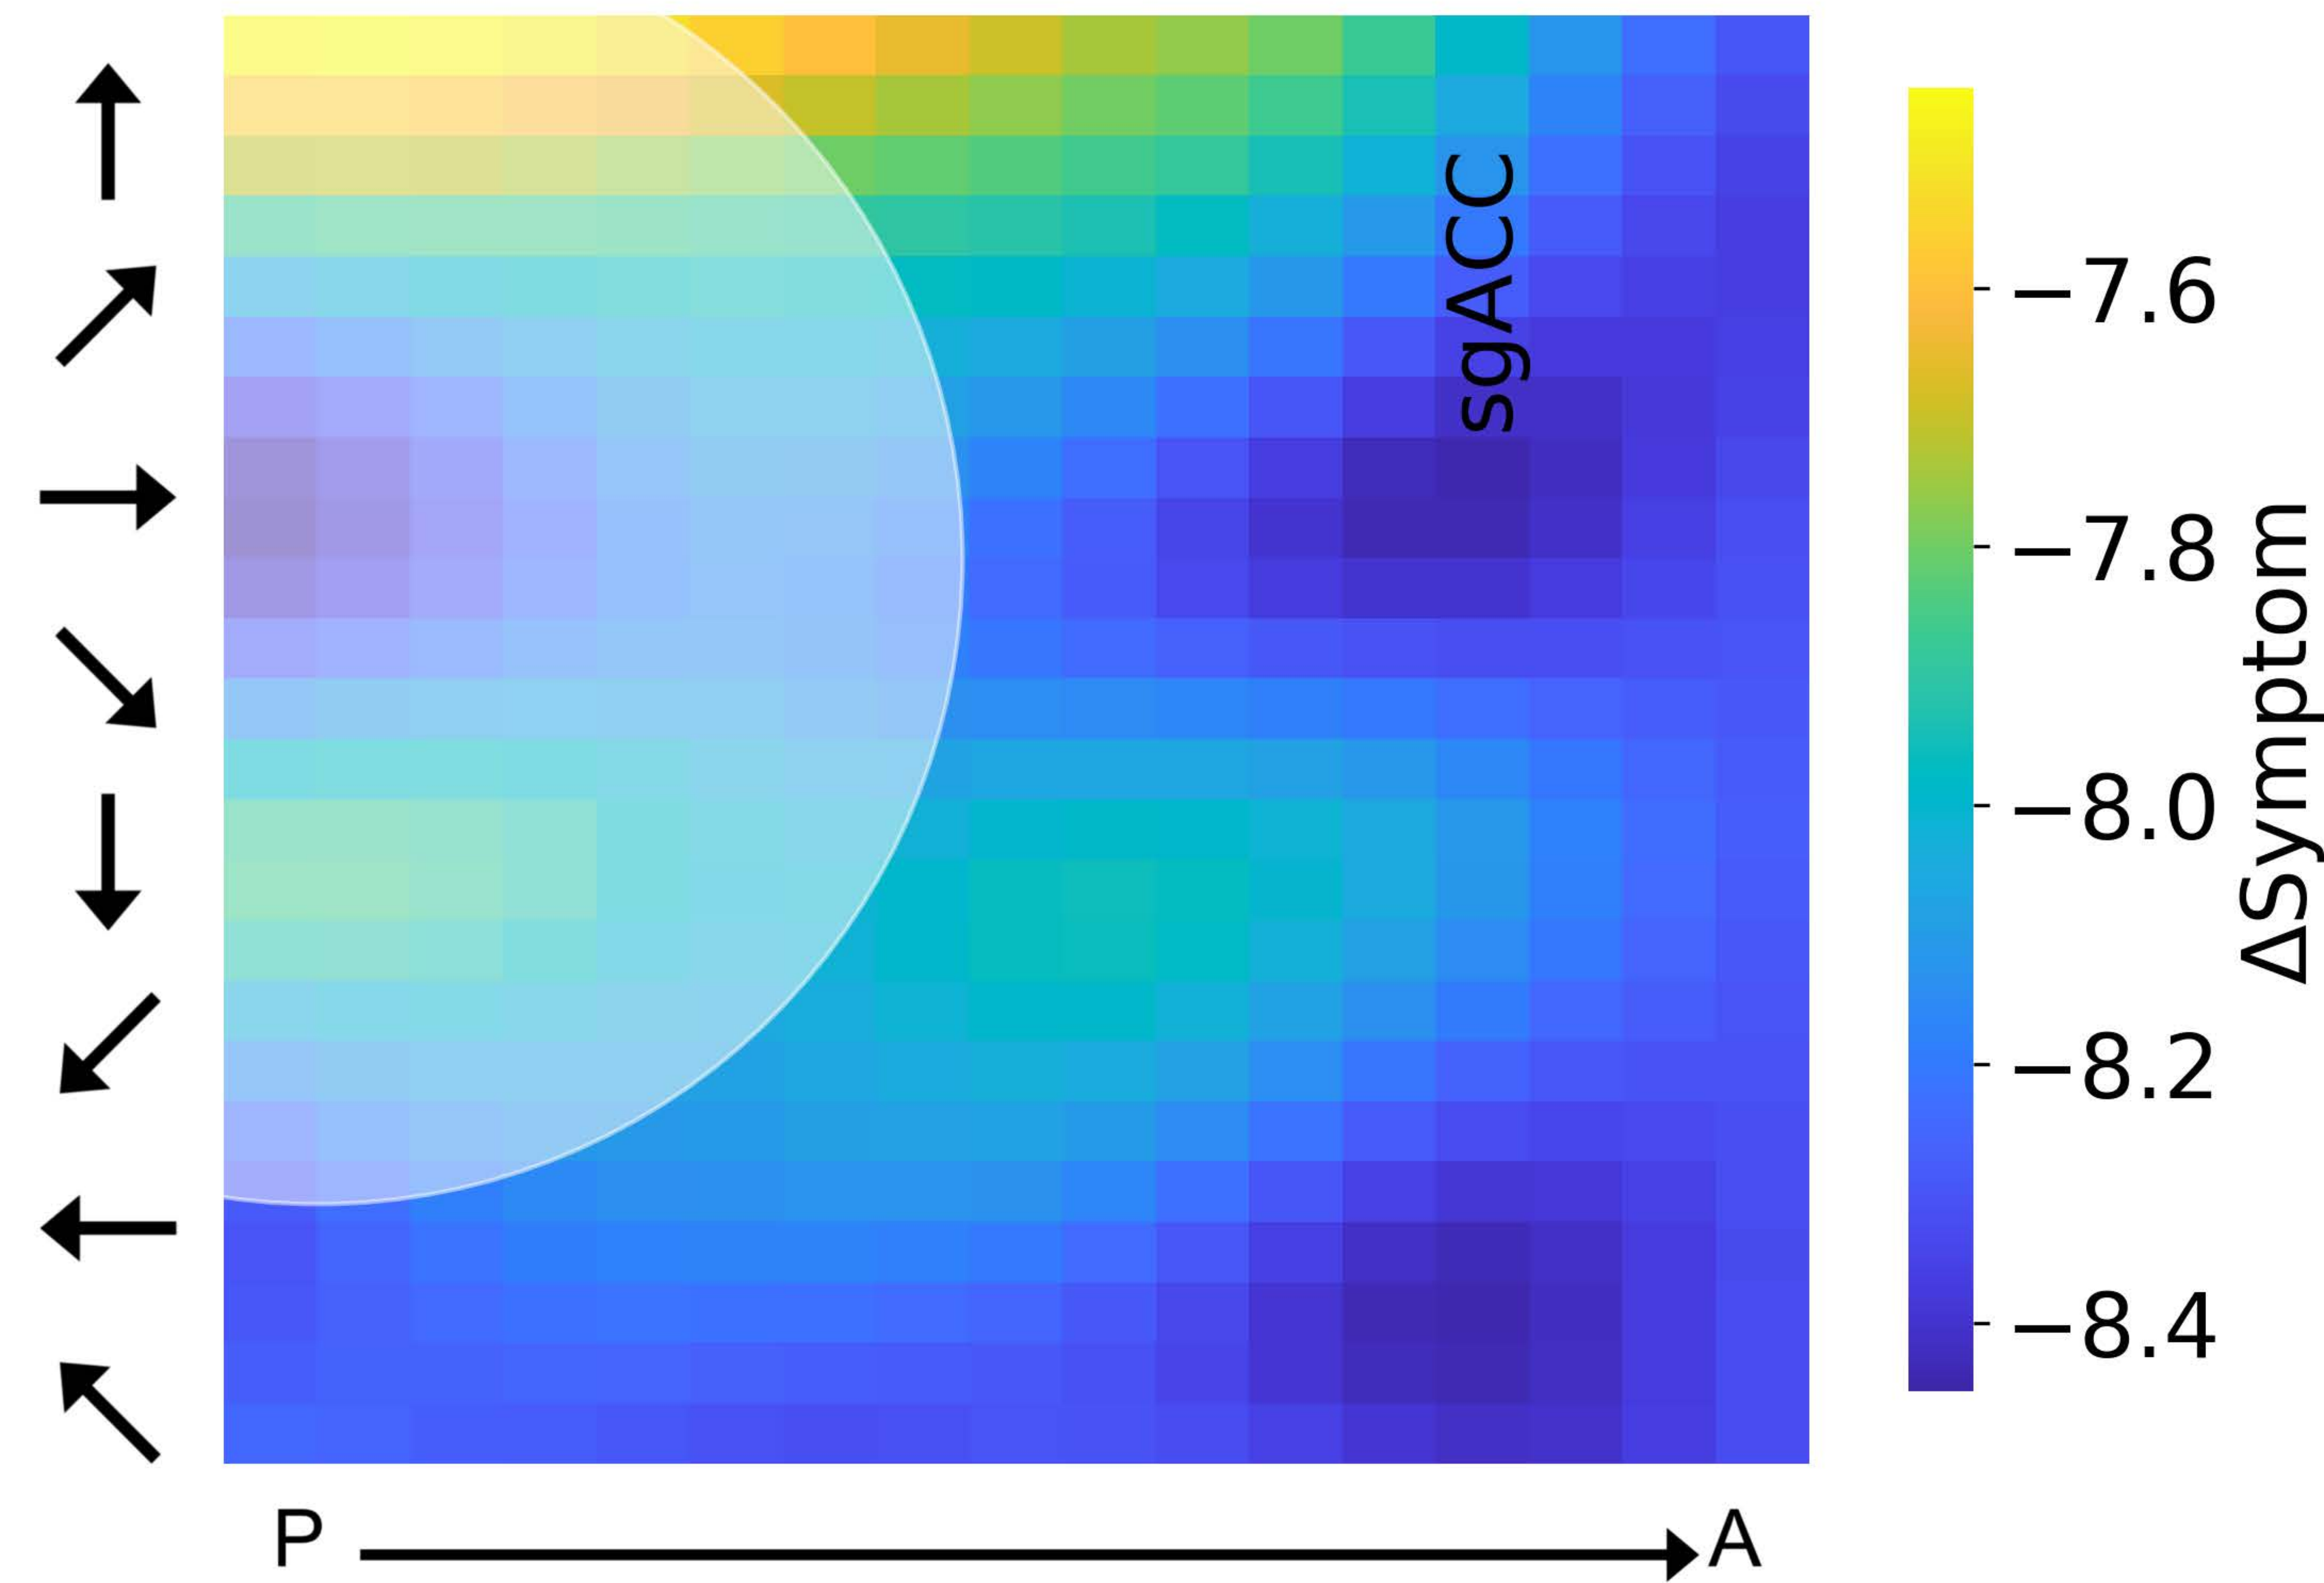



# NDARRRD55DDH\_madrs\_right\_dlpfc

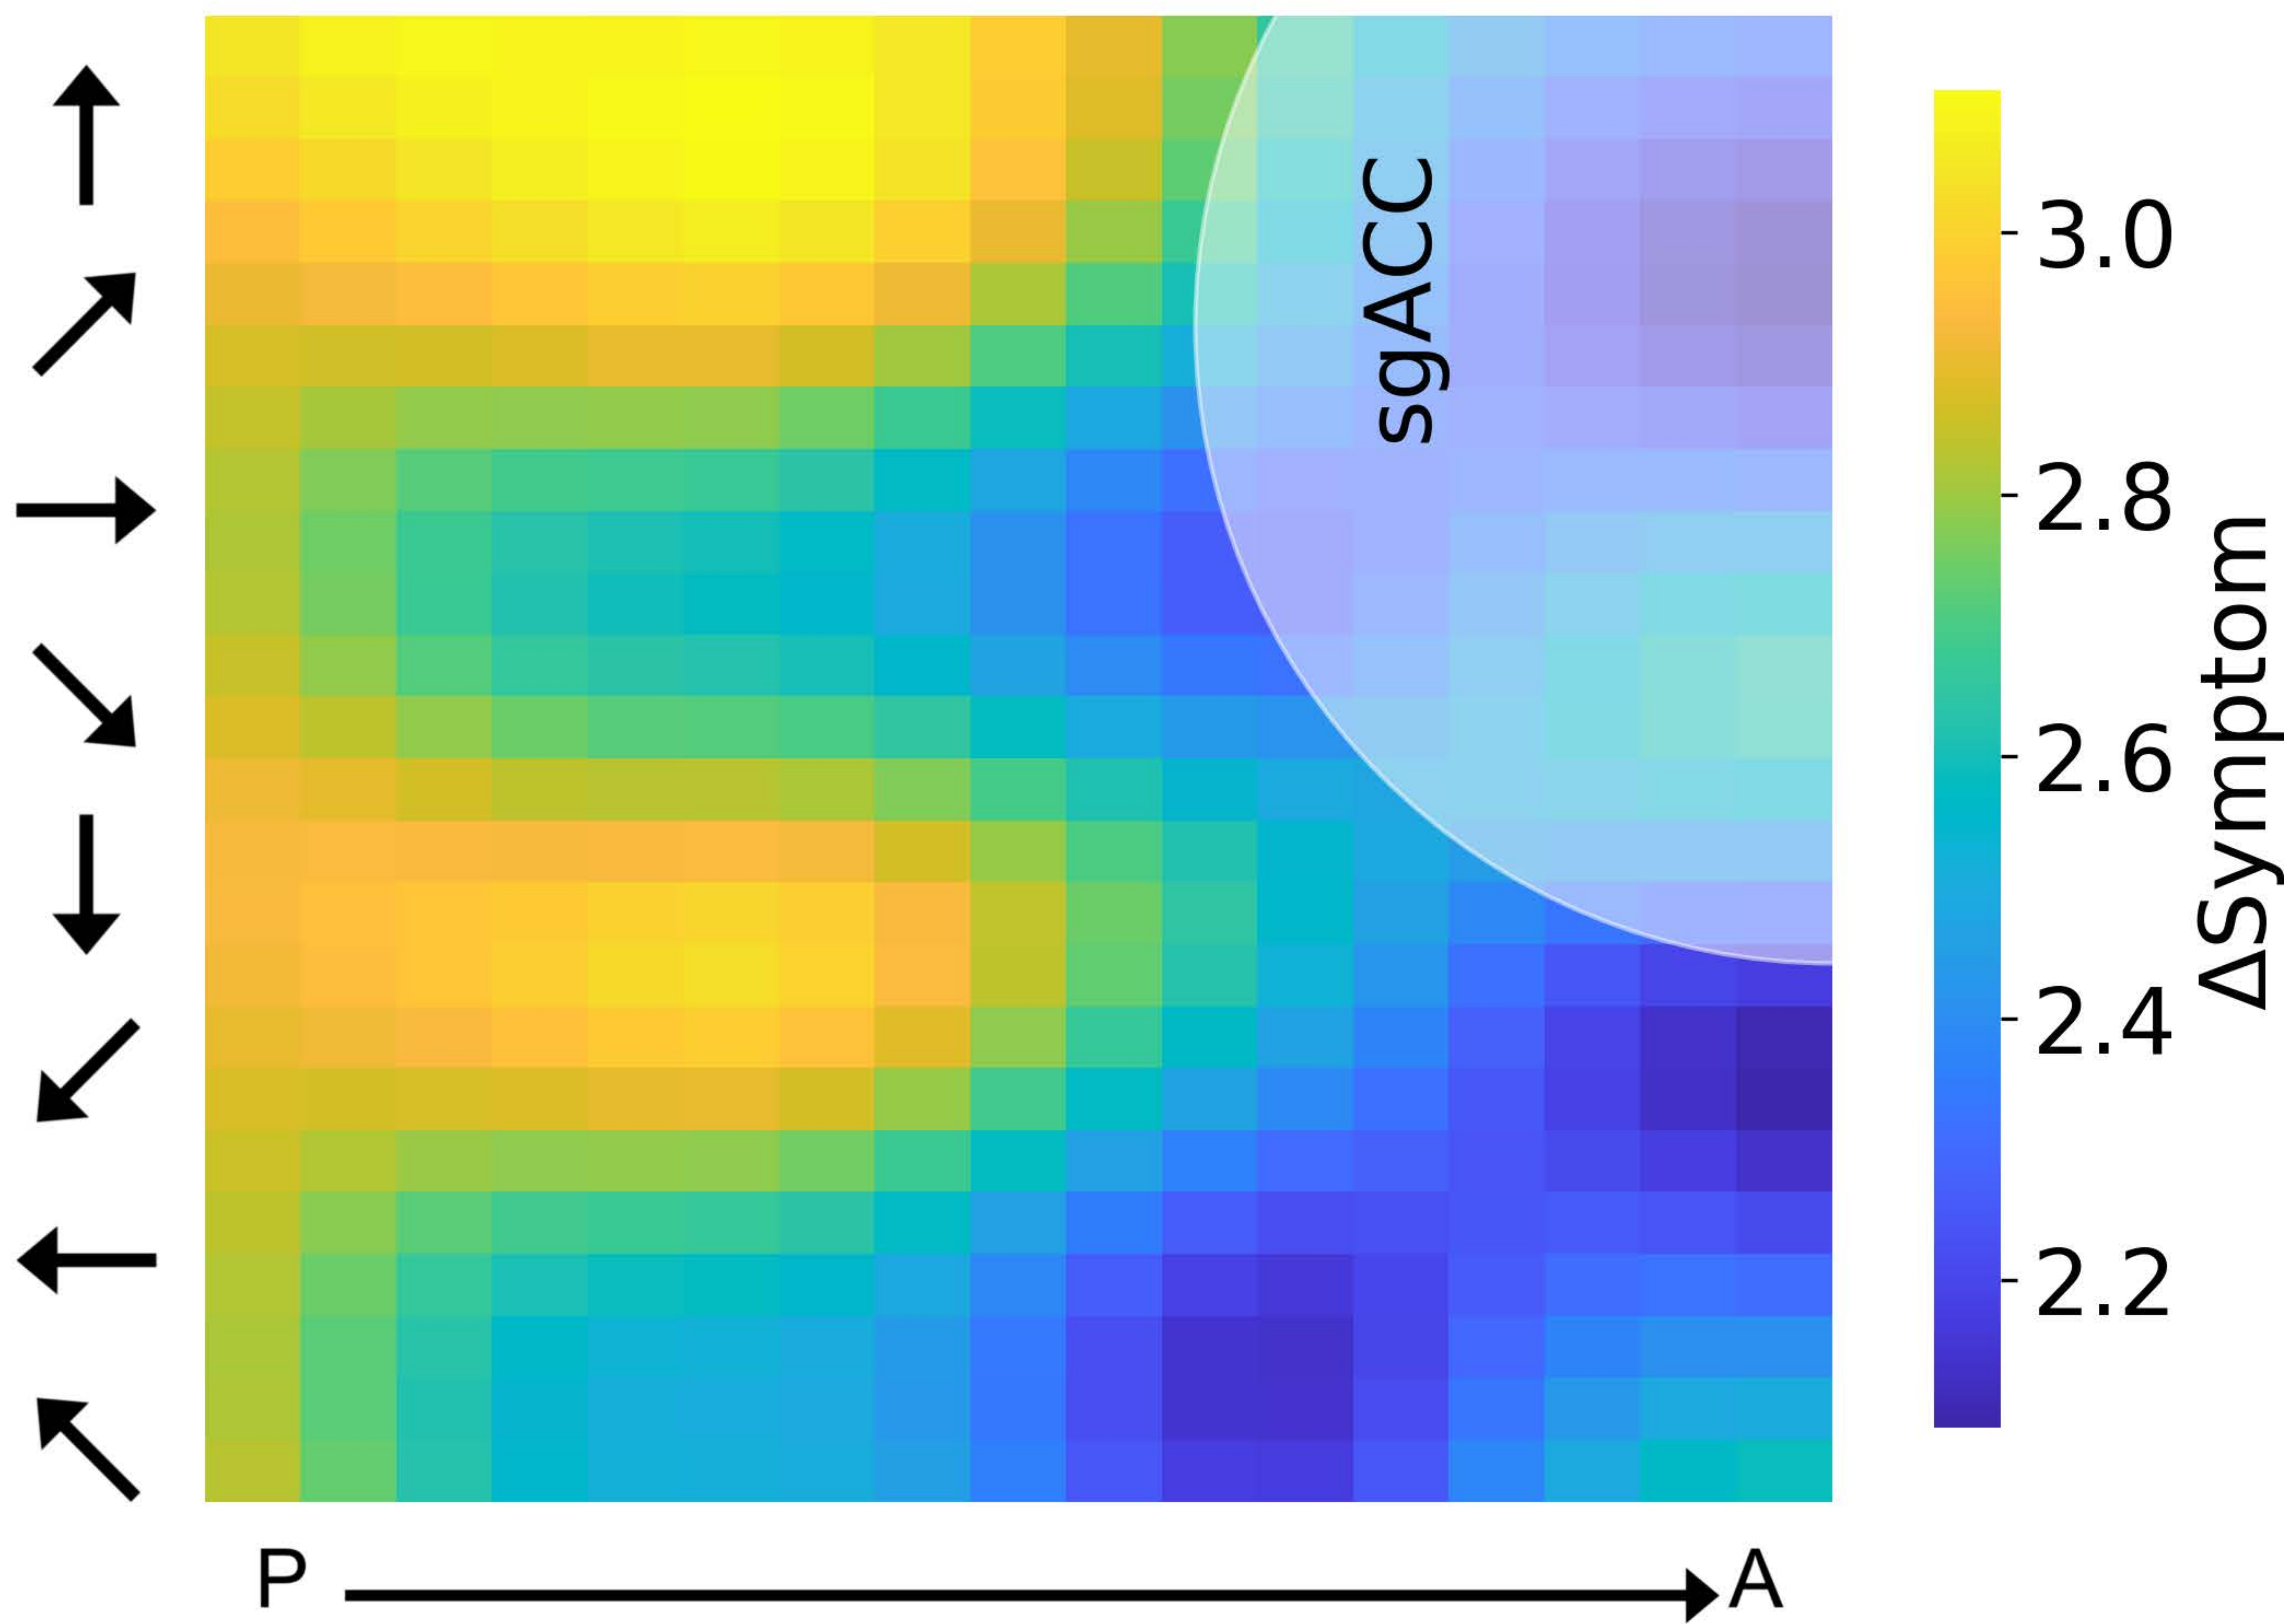



# NDARRRF879TA3\_madrs\_right\_dlpfc

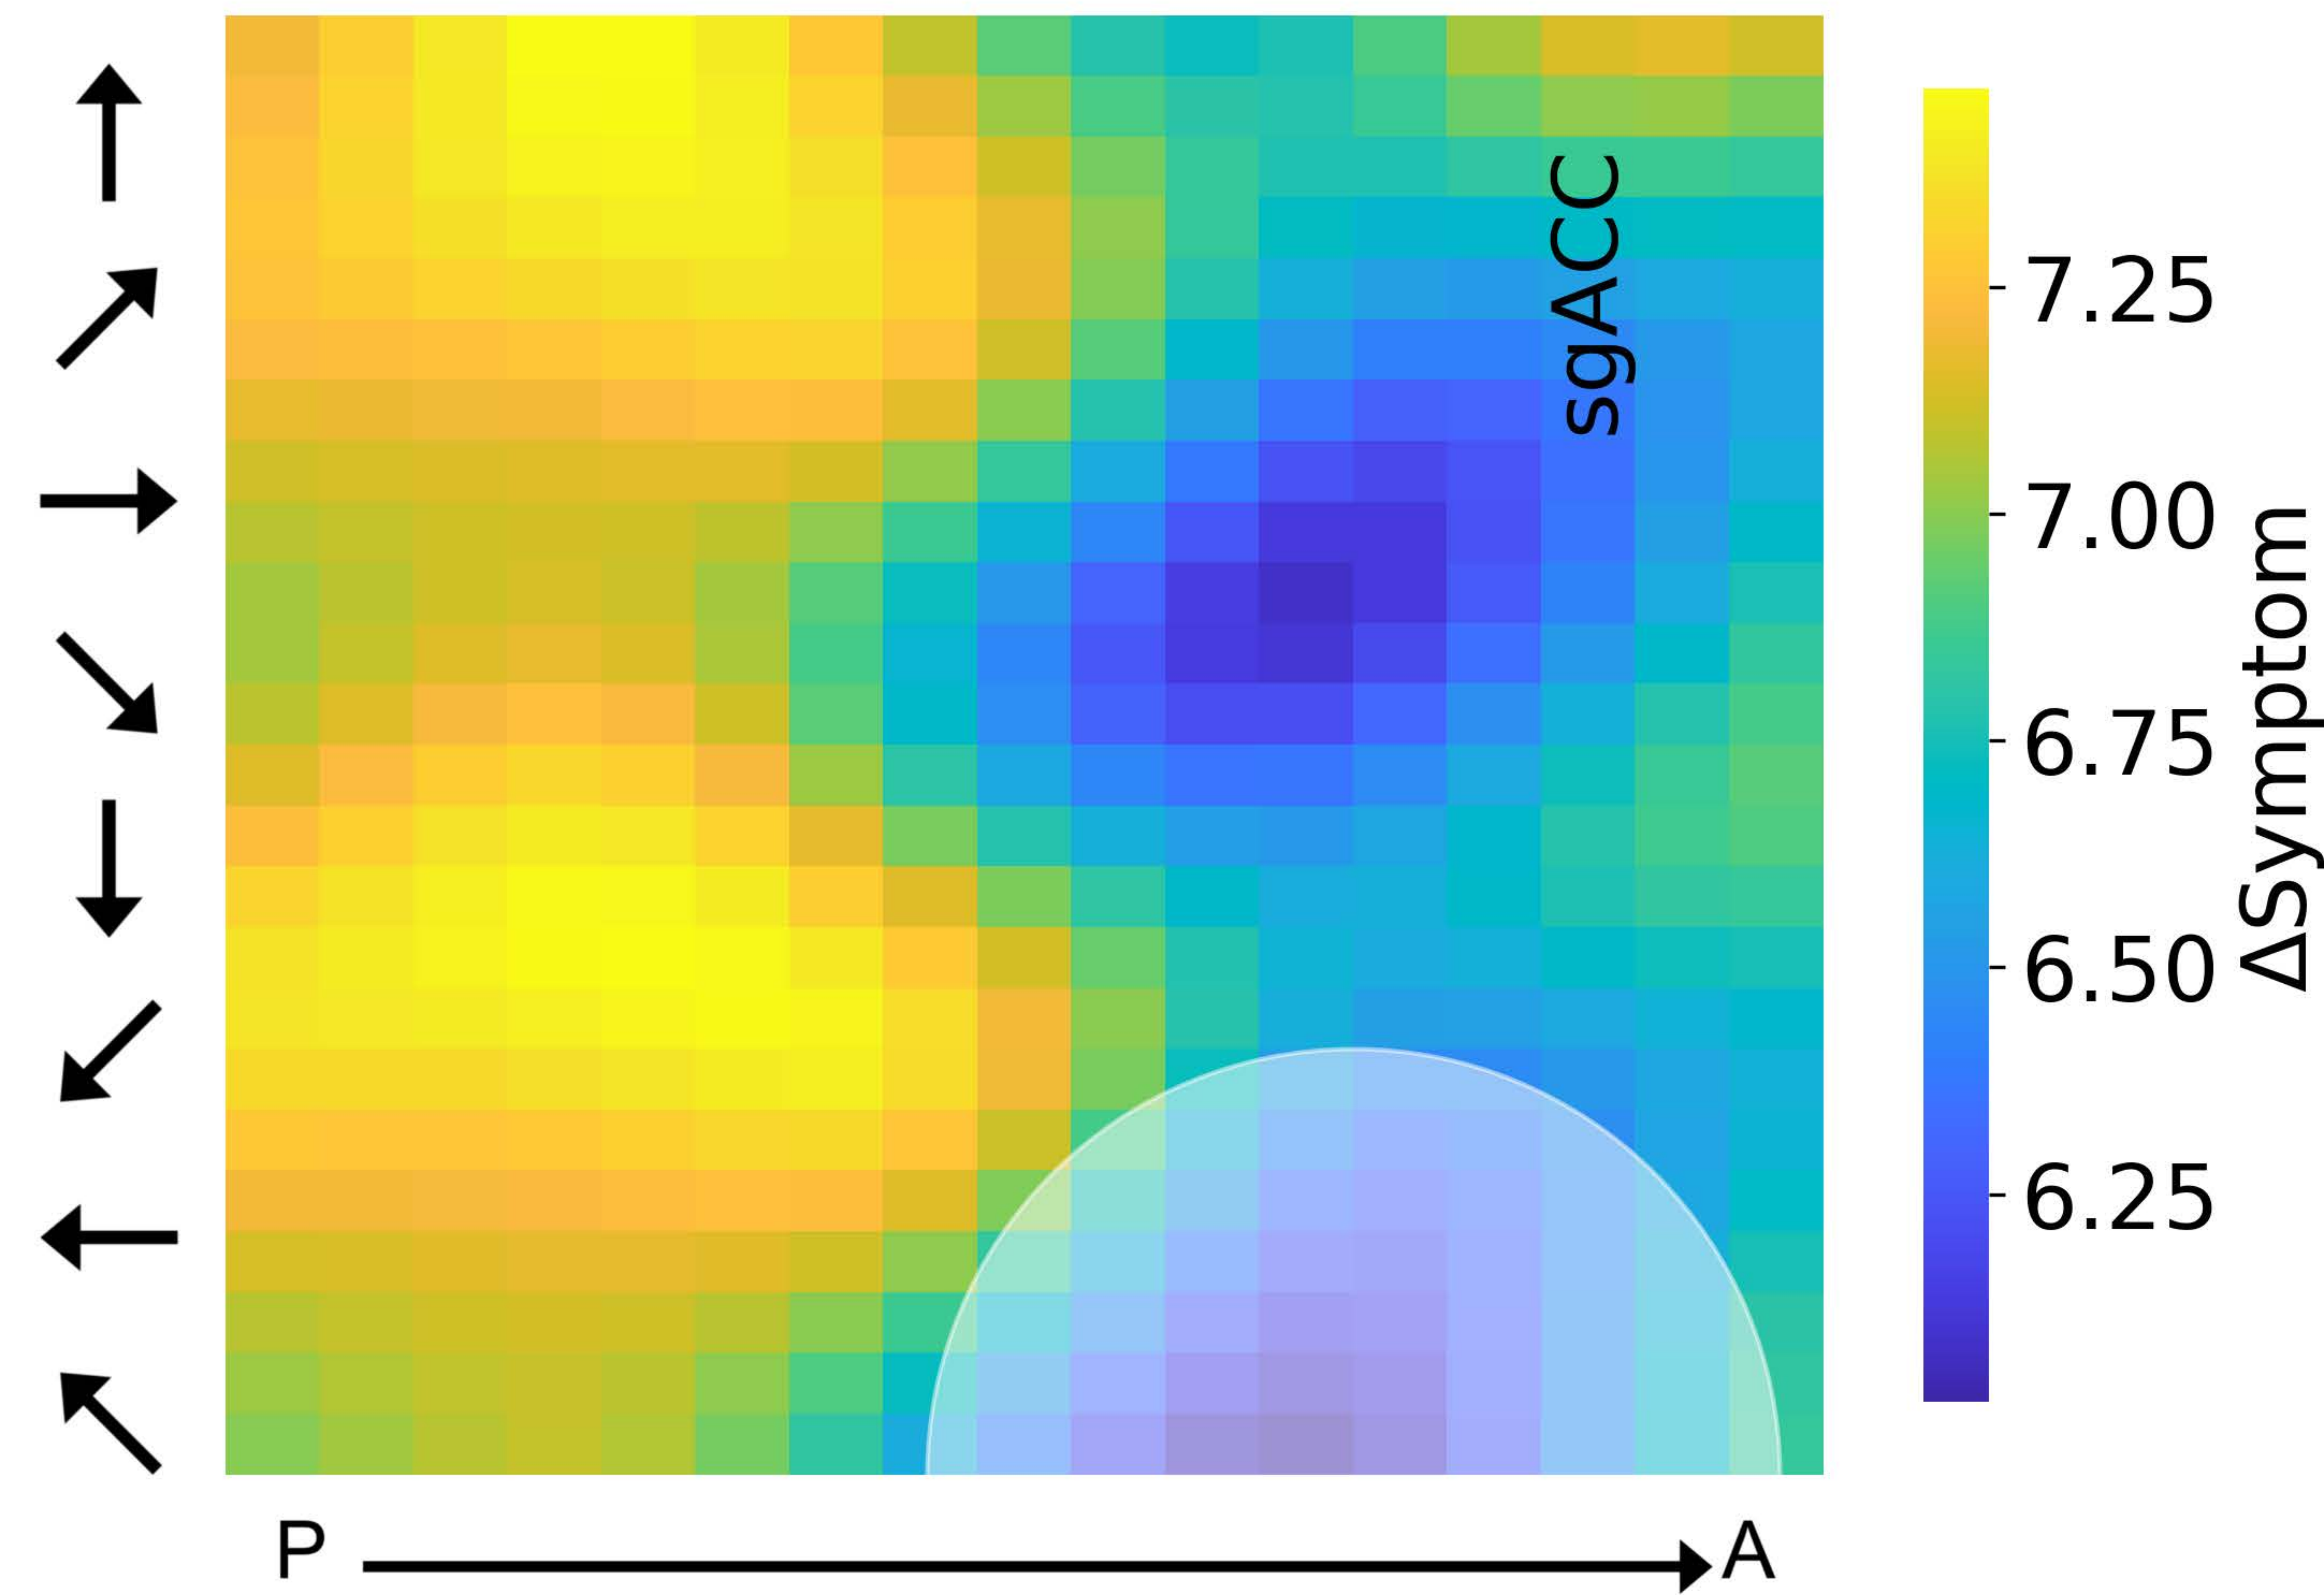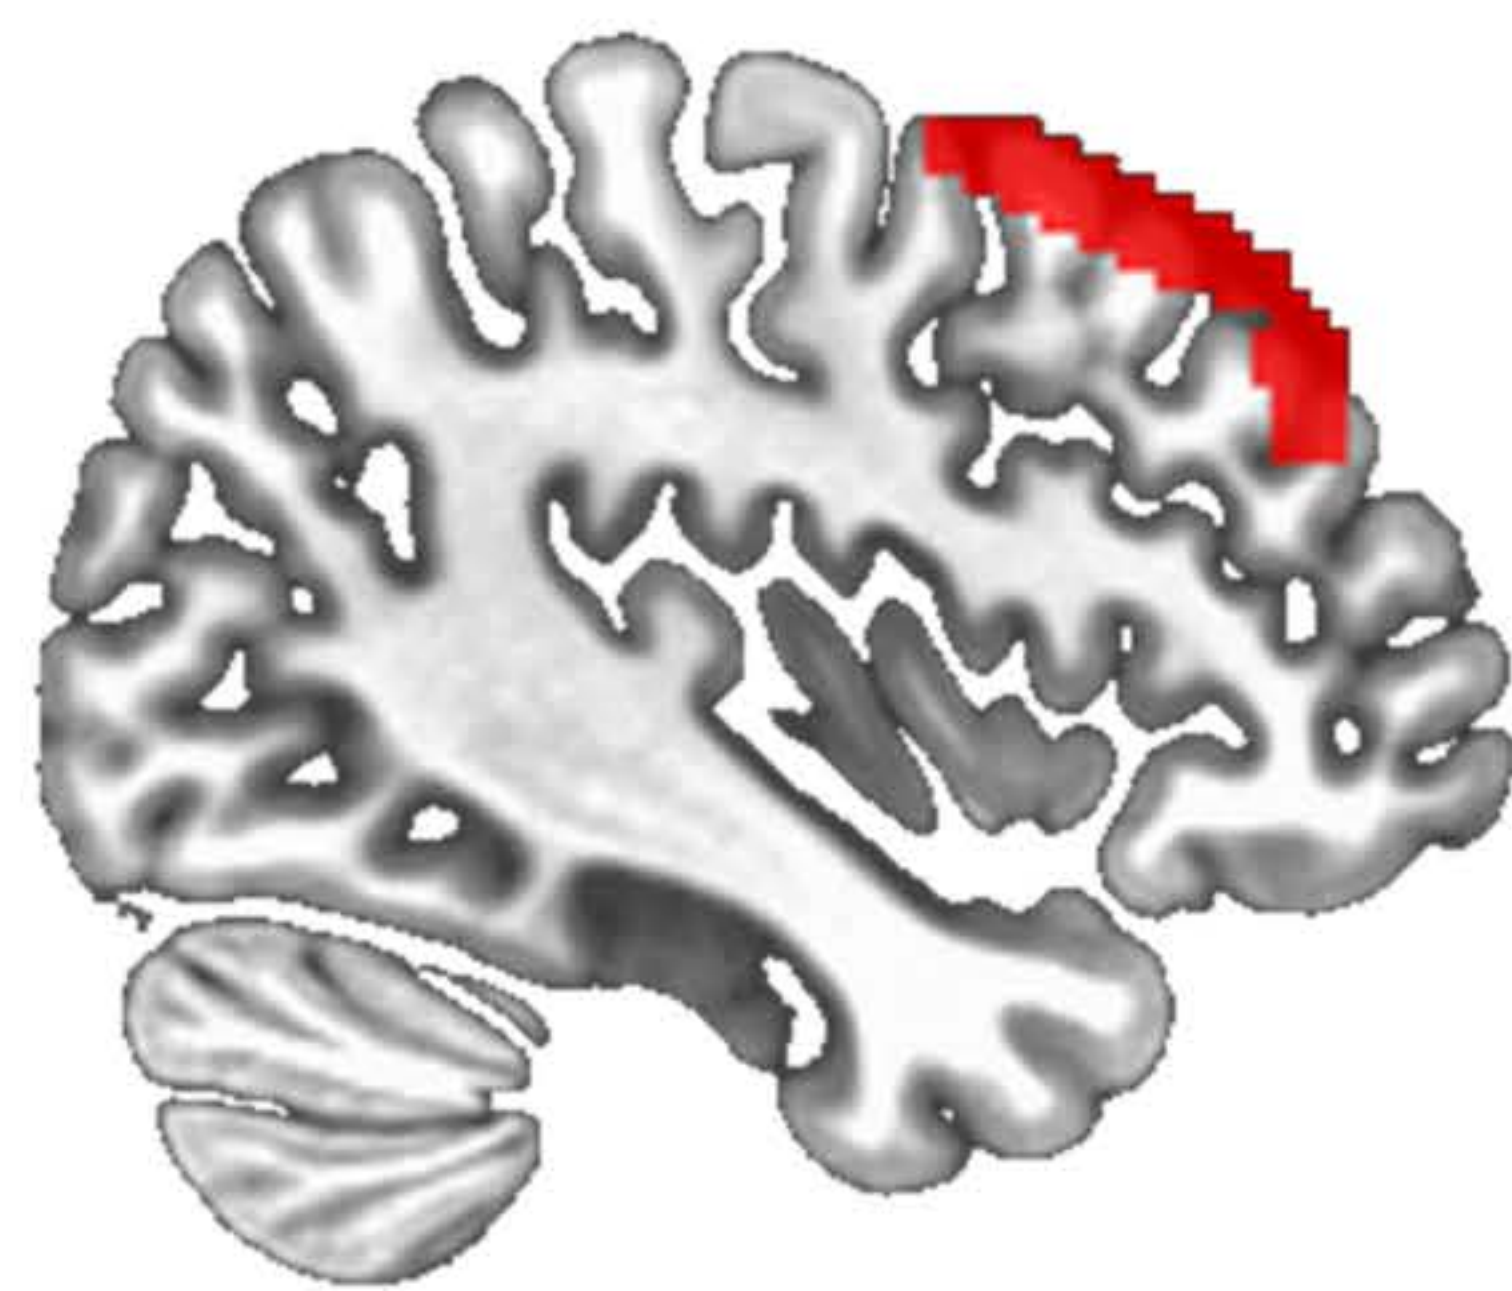



# NDARRRG943WGE\_madrs\_right\_dlpfc

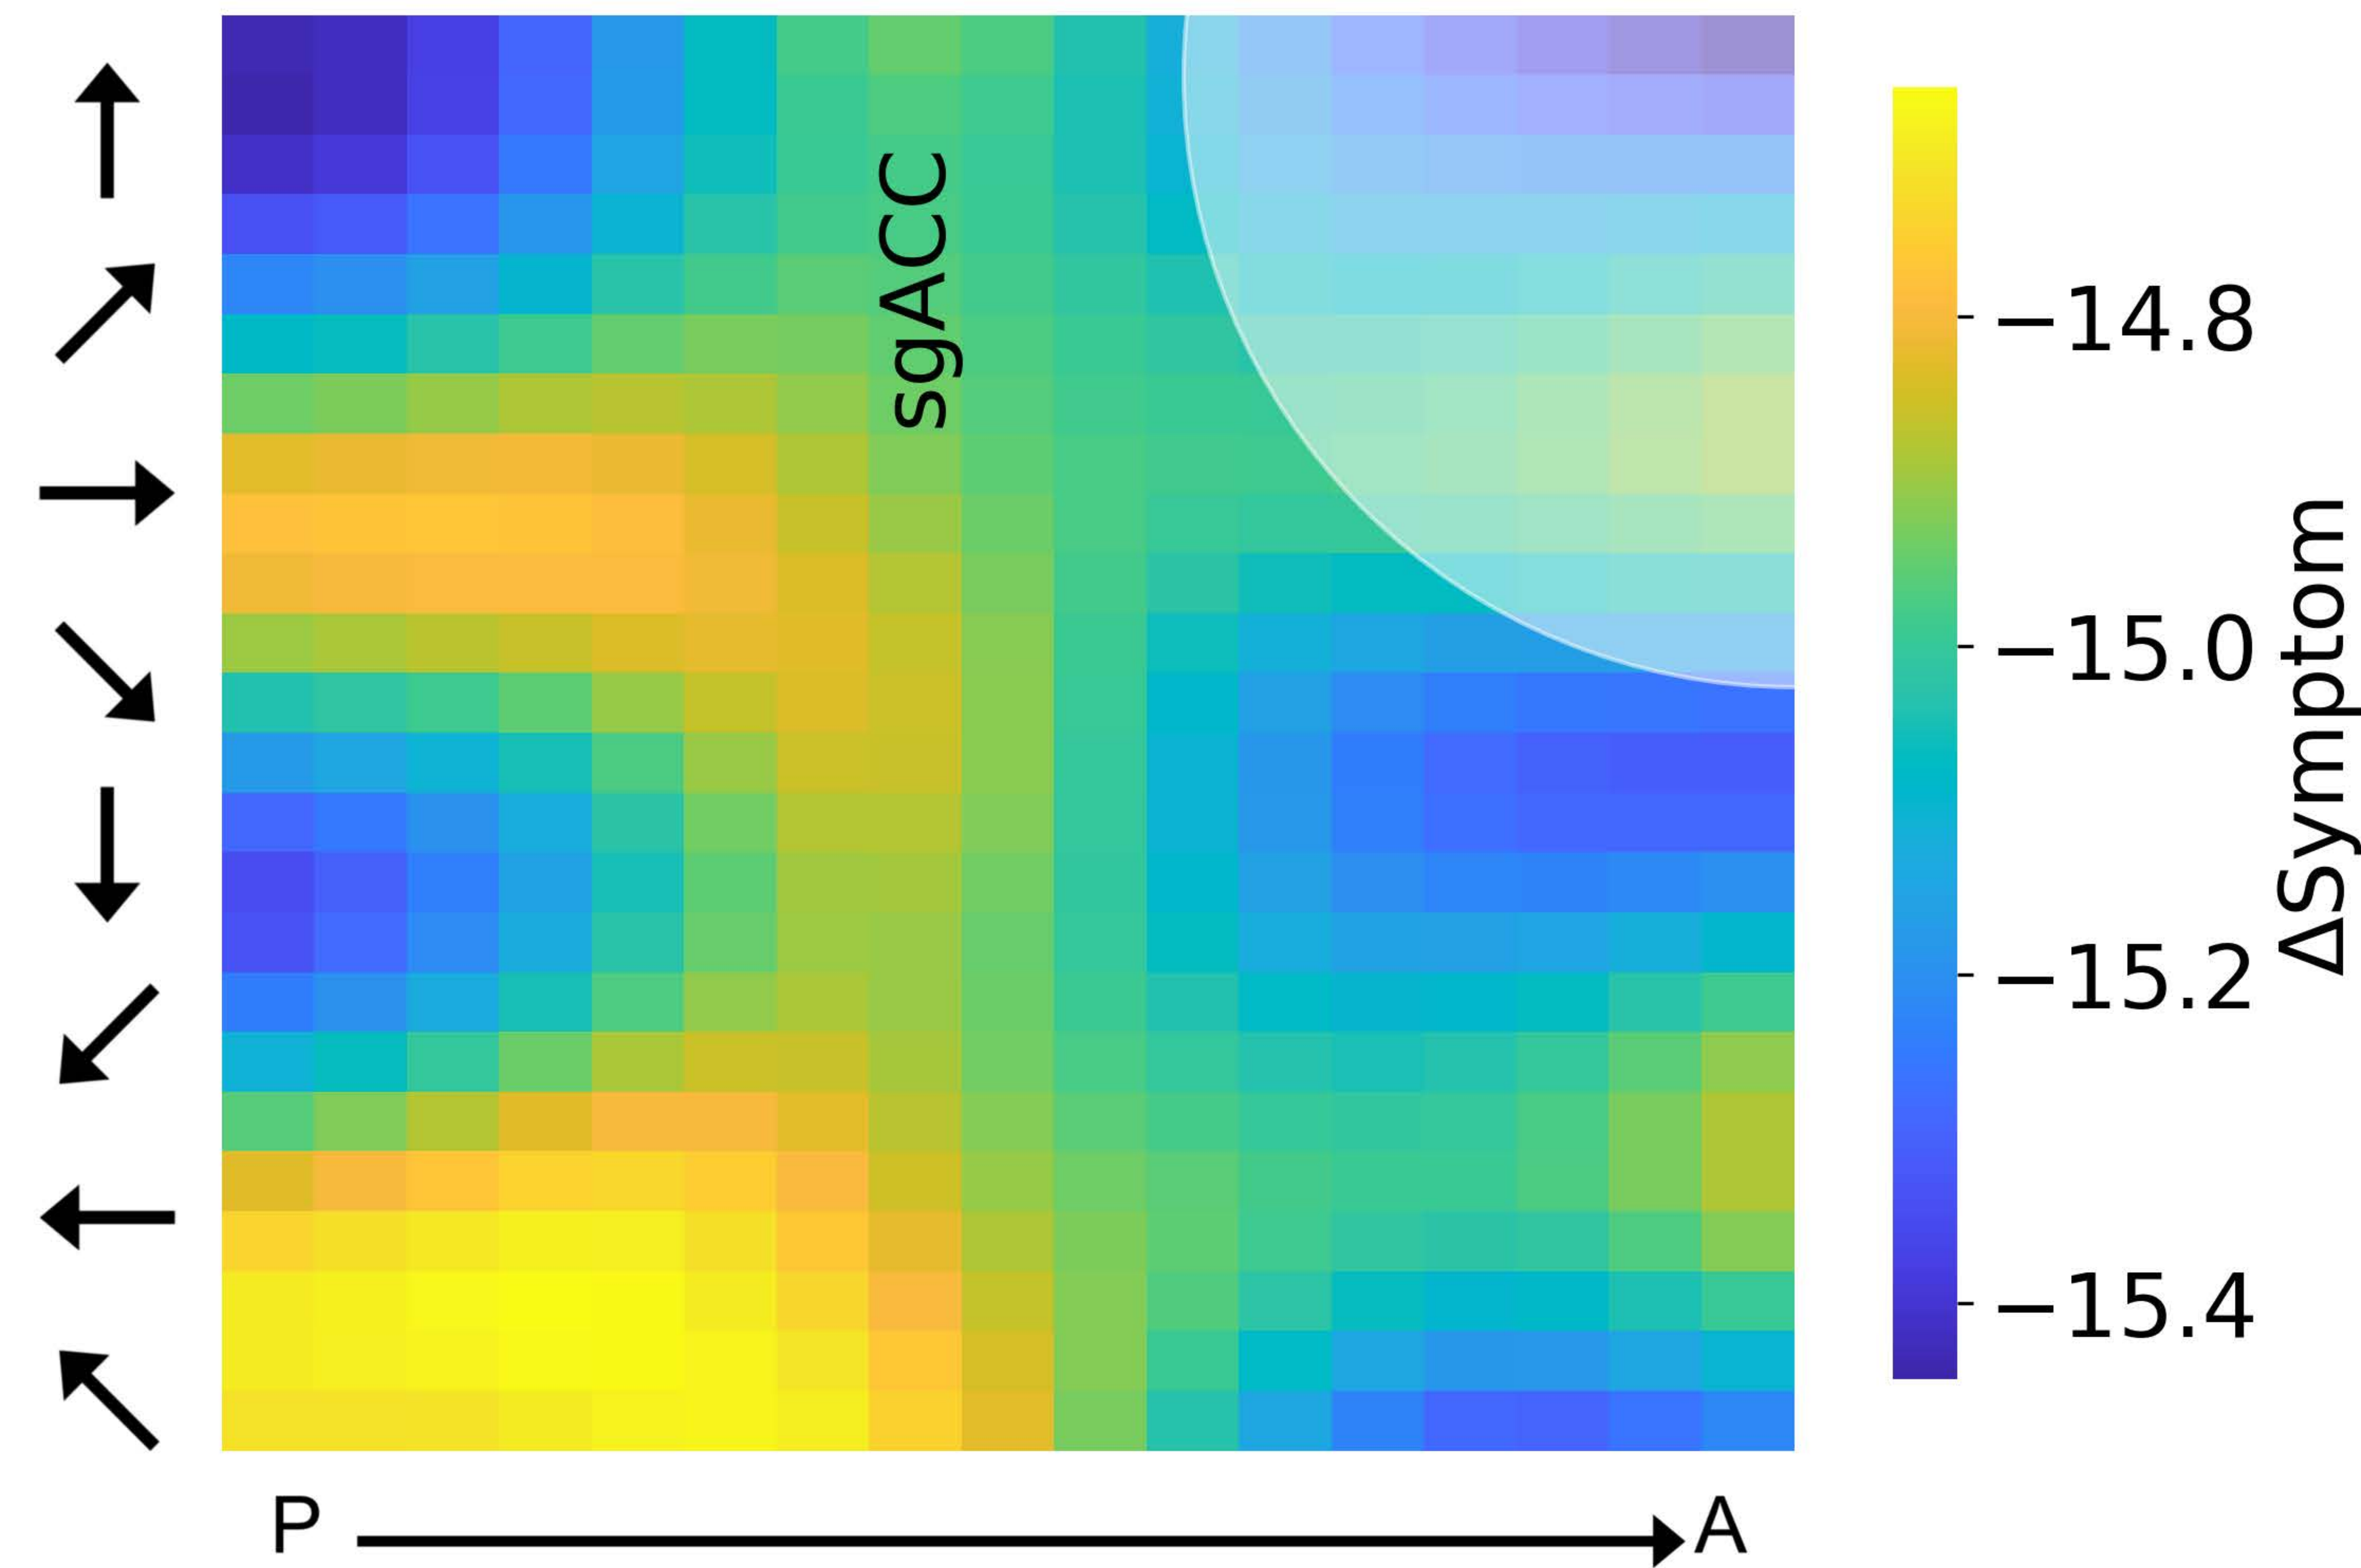



# NDARRRM328EP8\_madrs\_right\_dlpfc

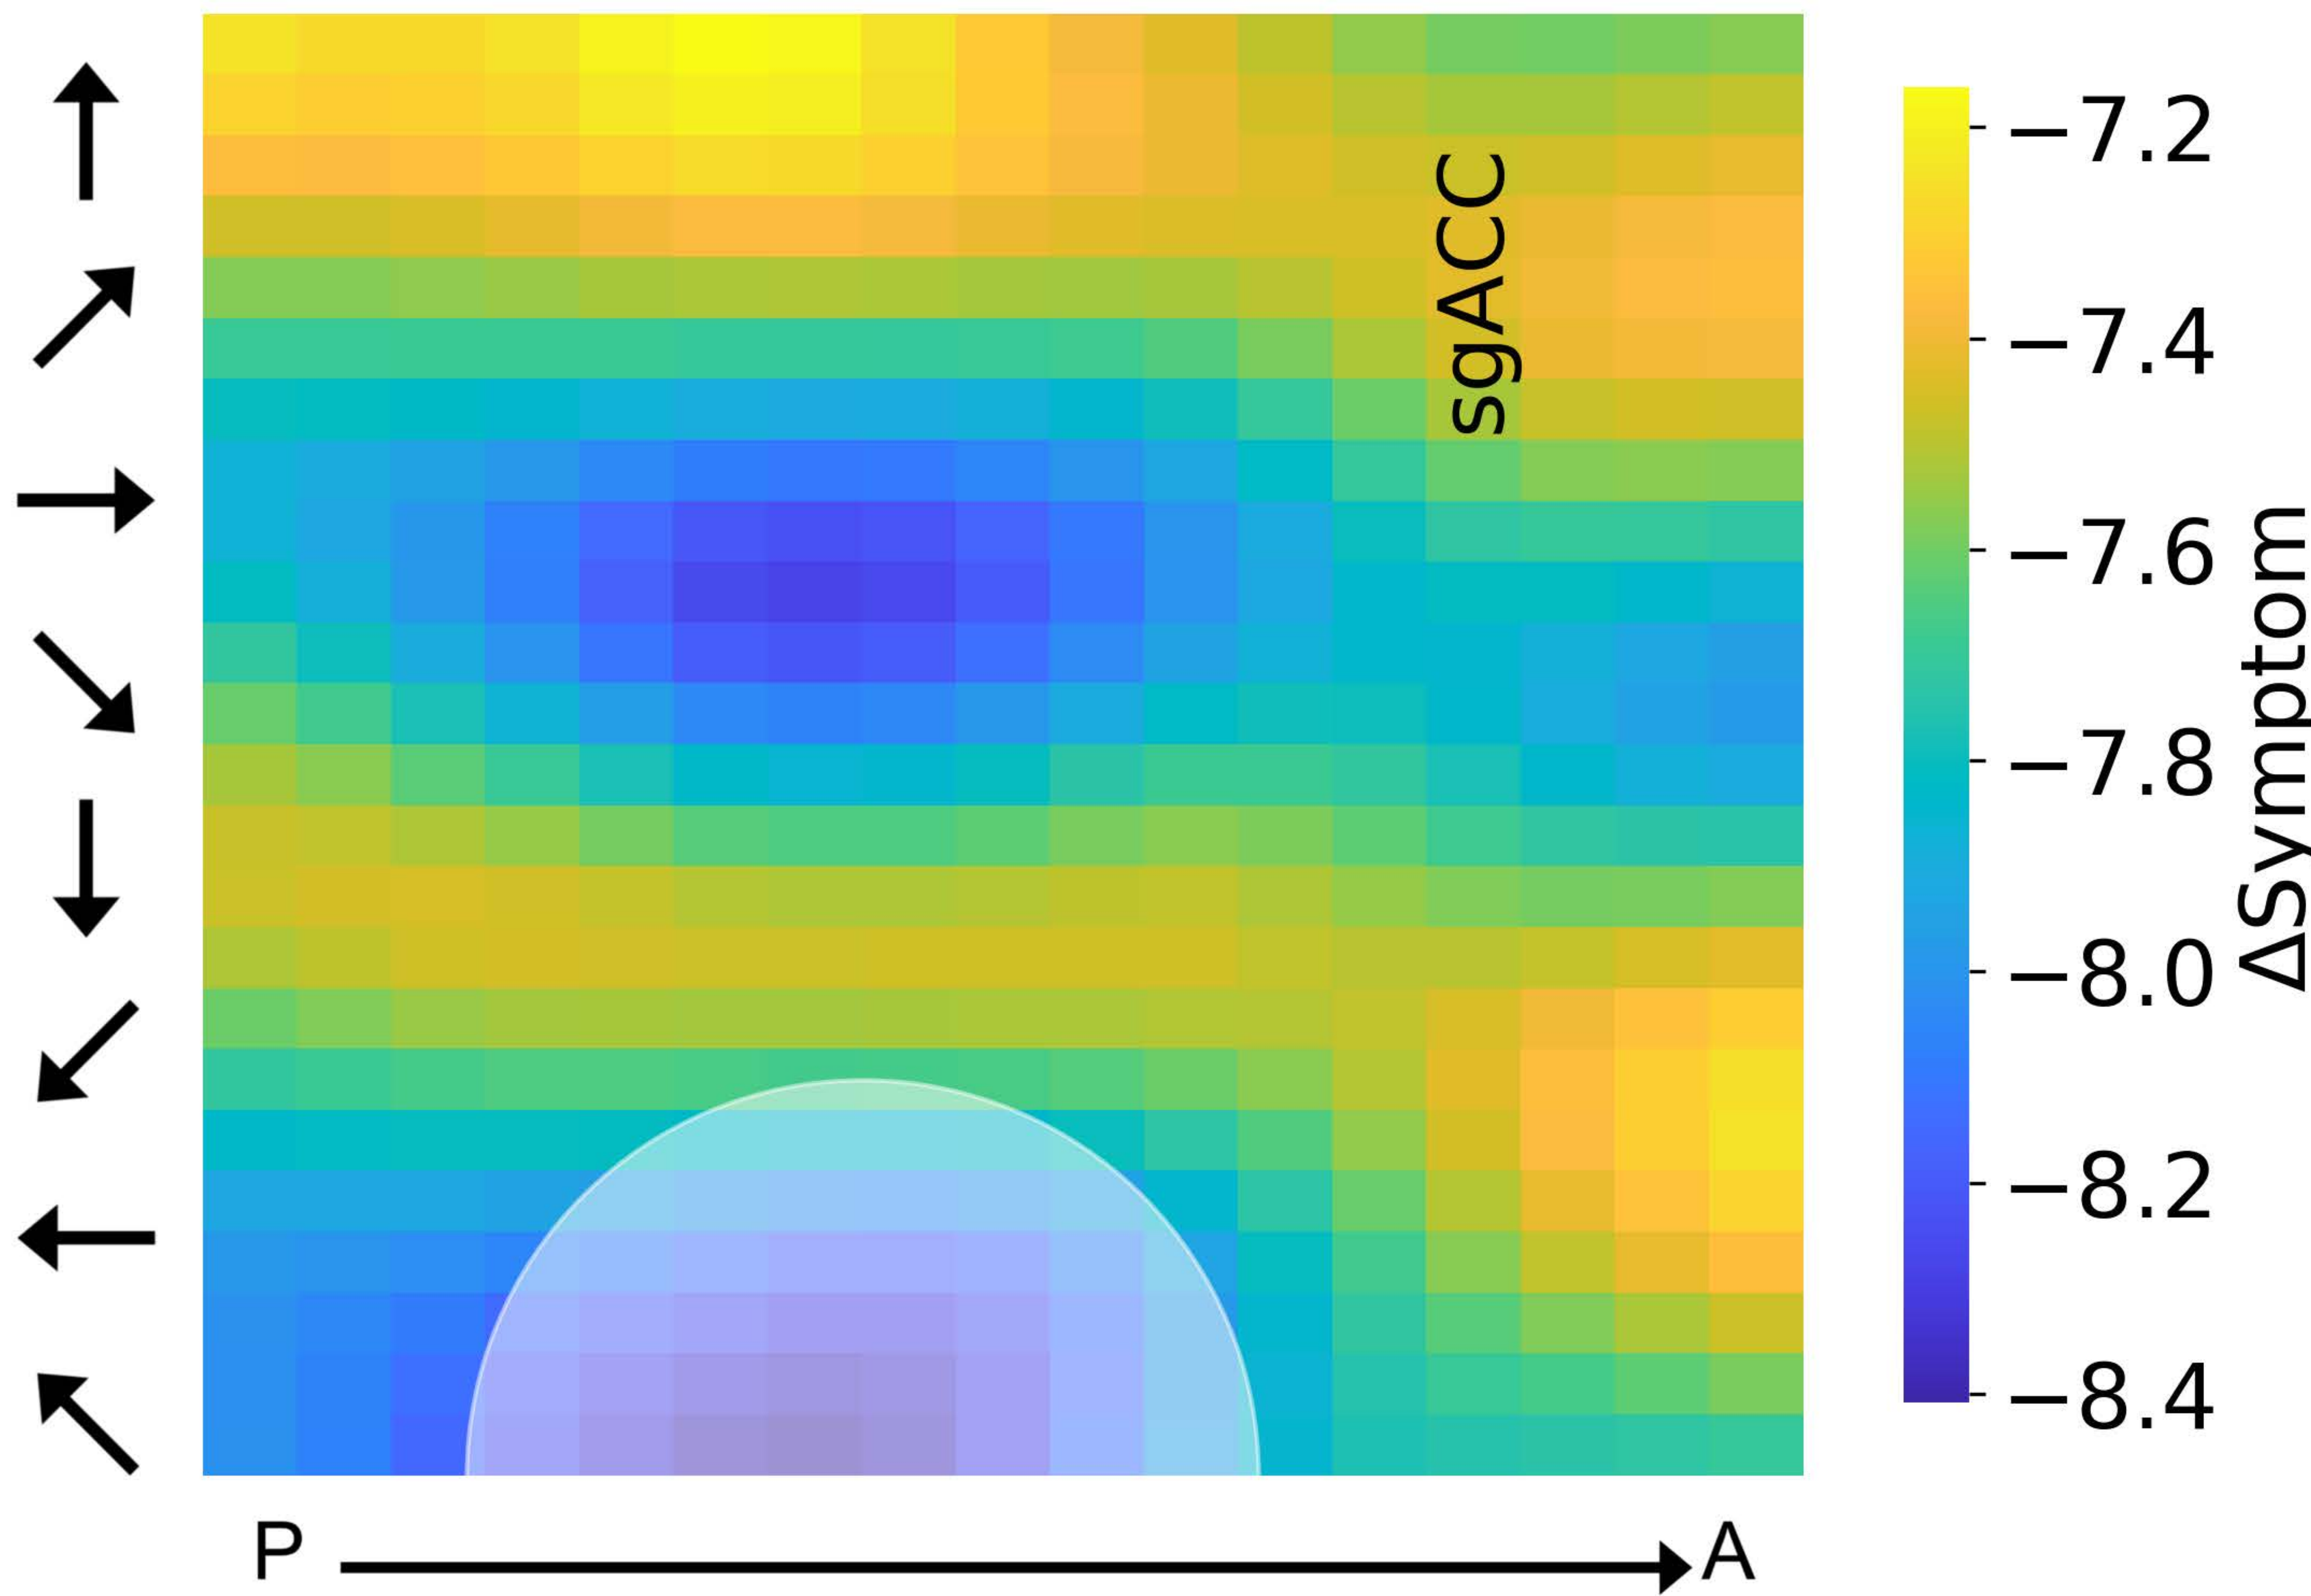



# NDARRRZ612NKG\_madrs\_right\_dlpfc

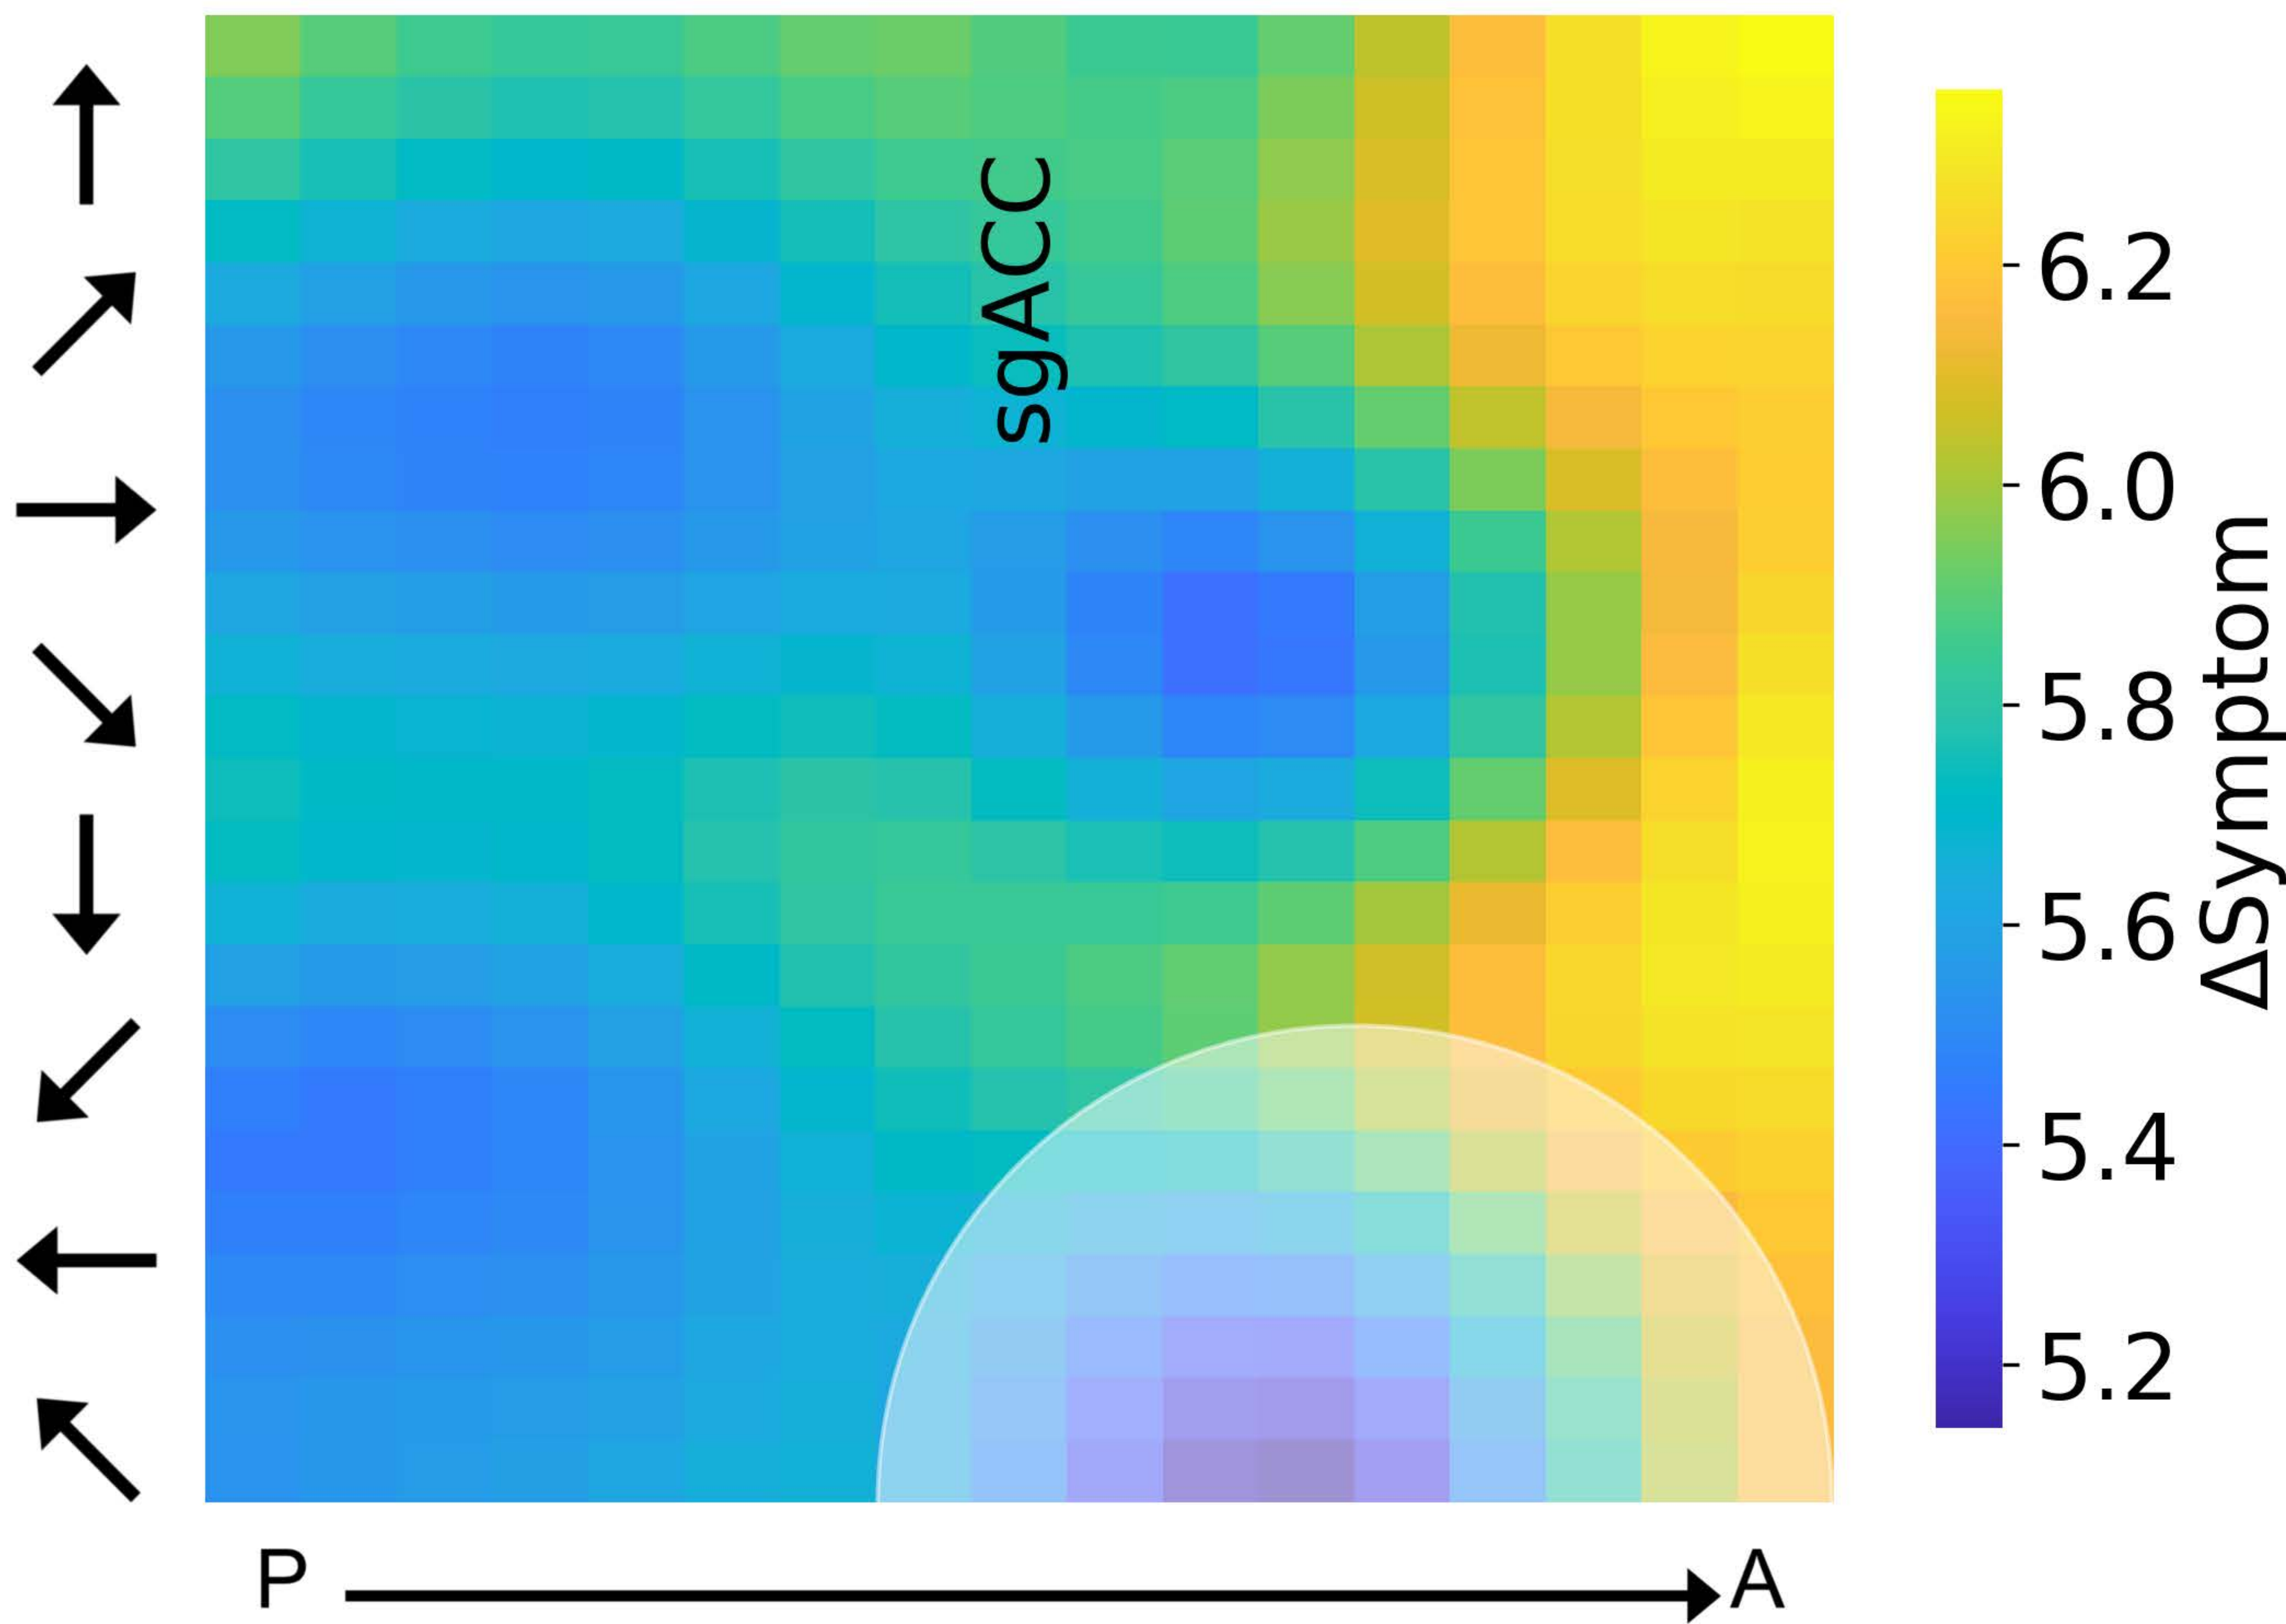



# INDARTH509MNV\_madrs\_right\_dlpfc

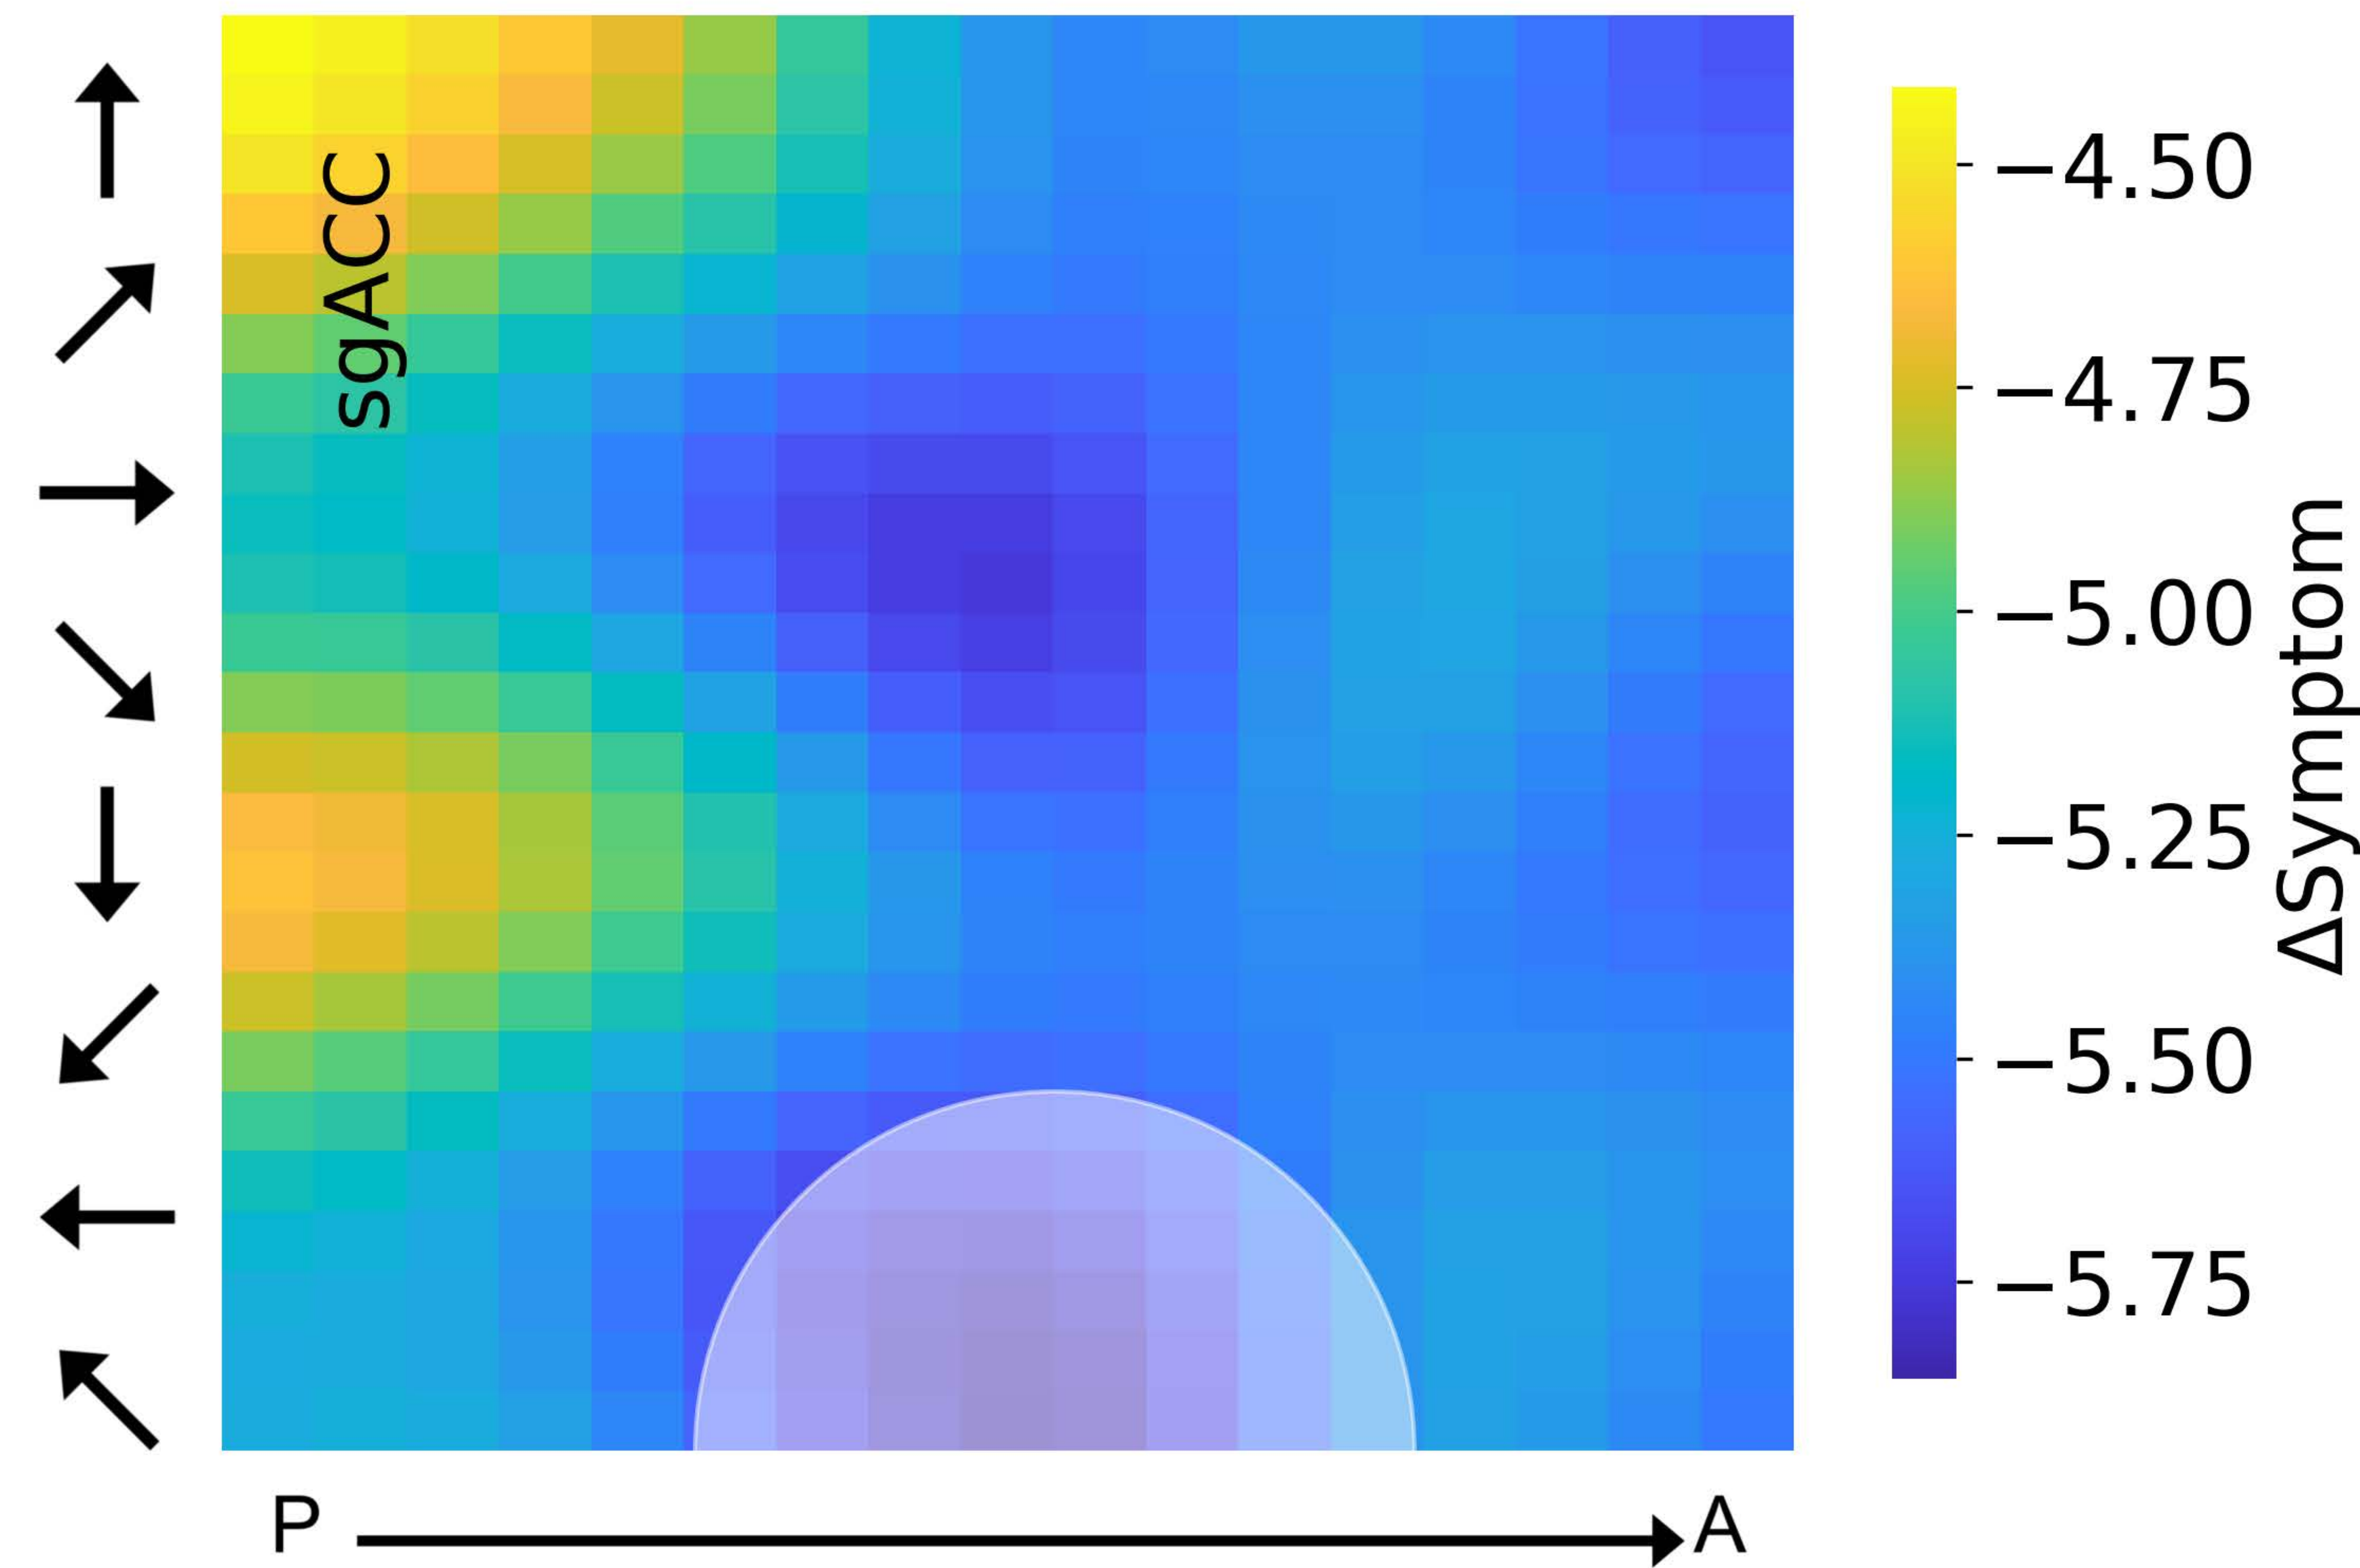



# NDARTT796GJK\_madrs\_right\_dlpfc

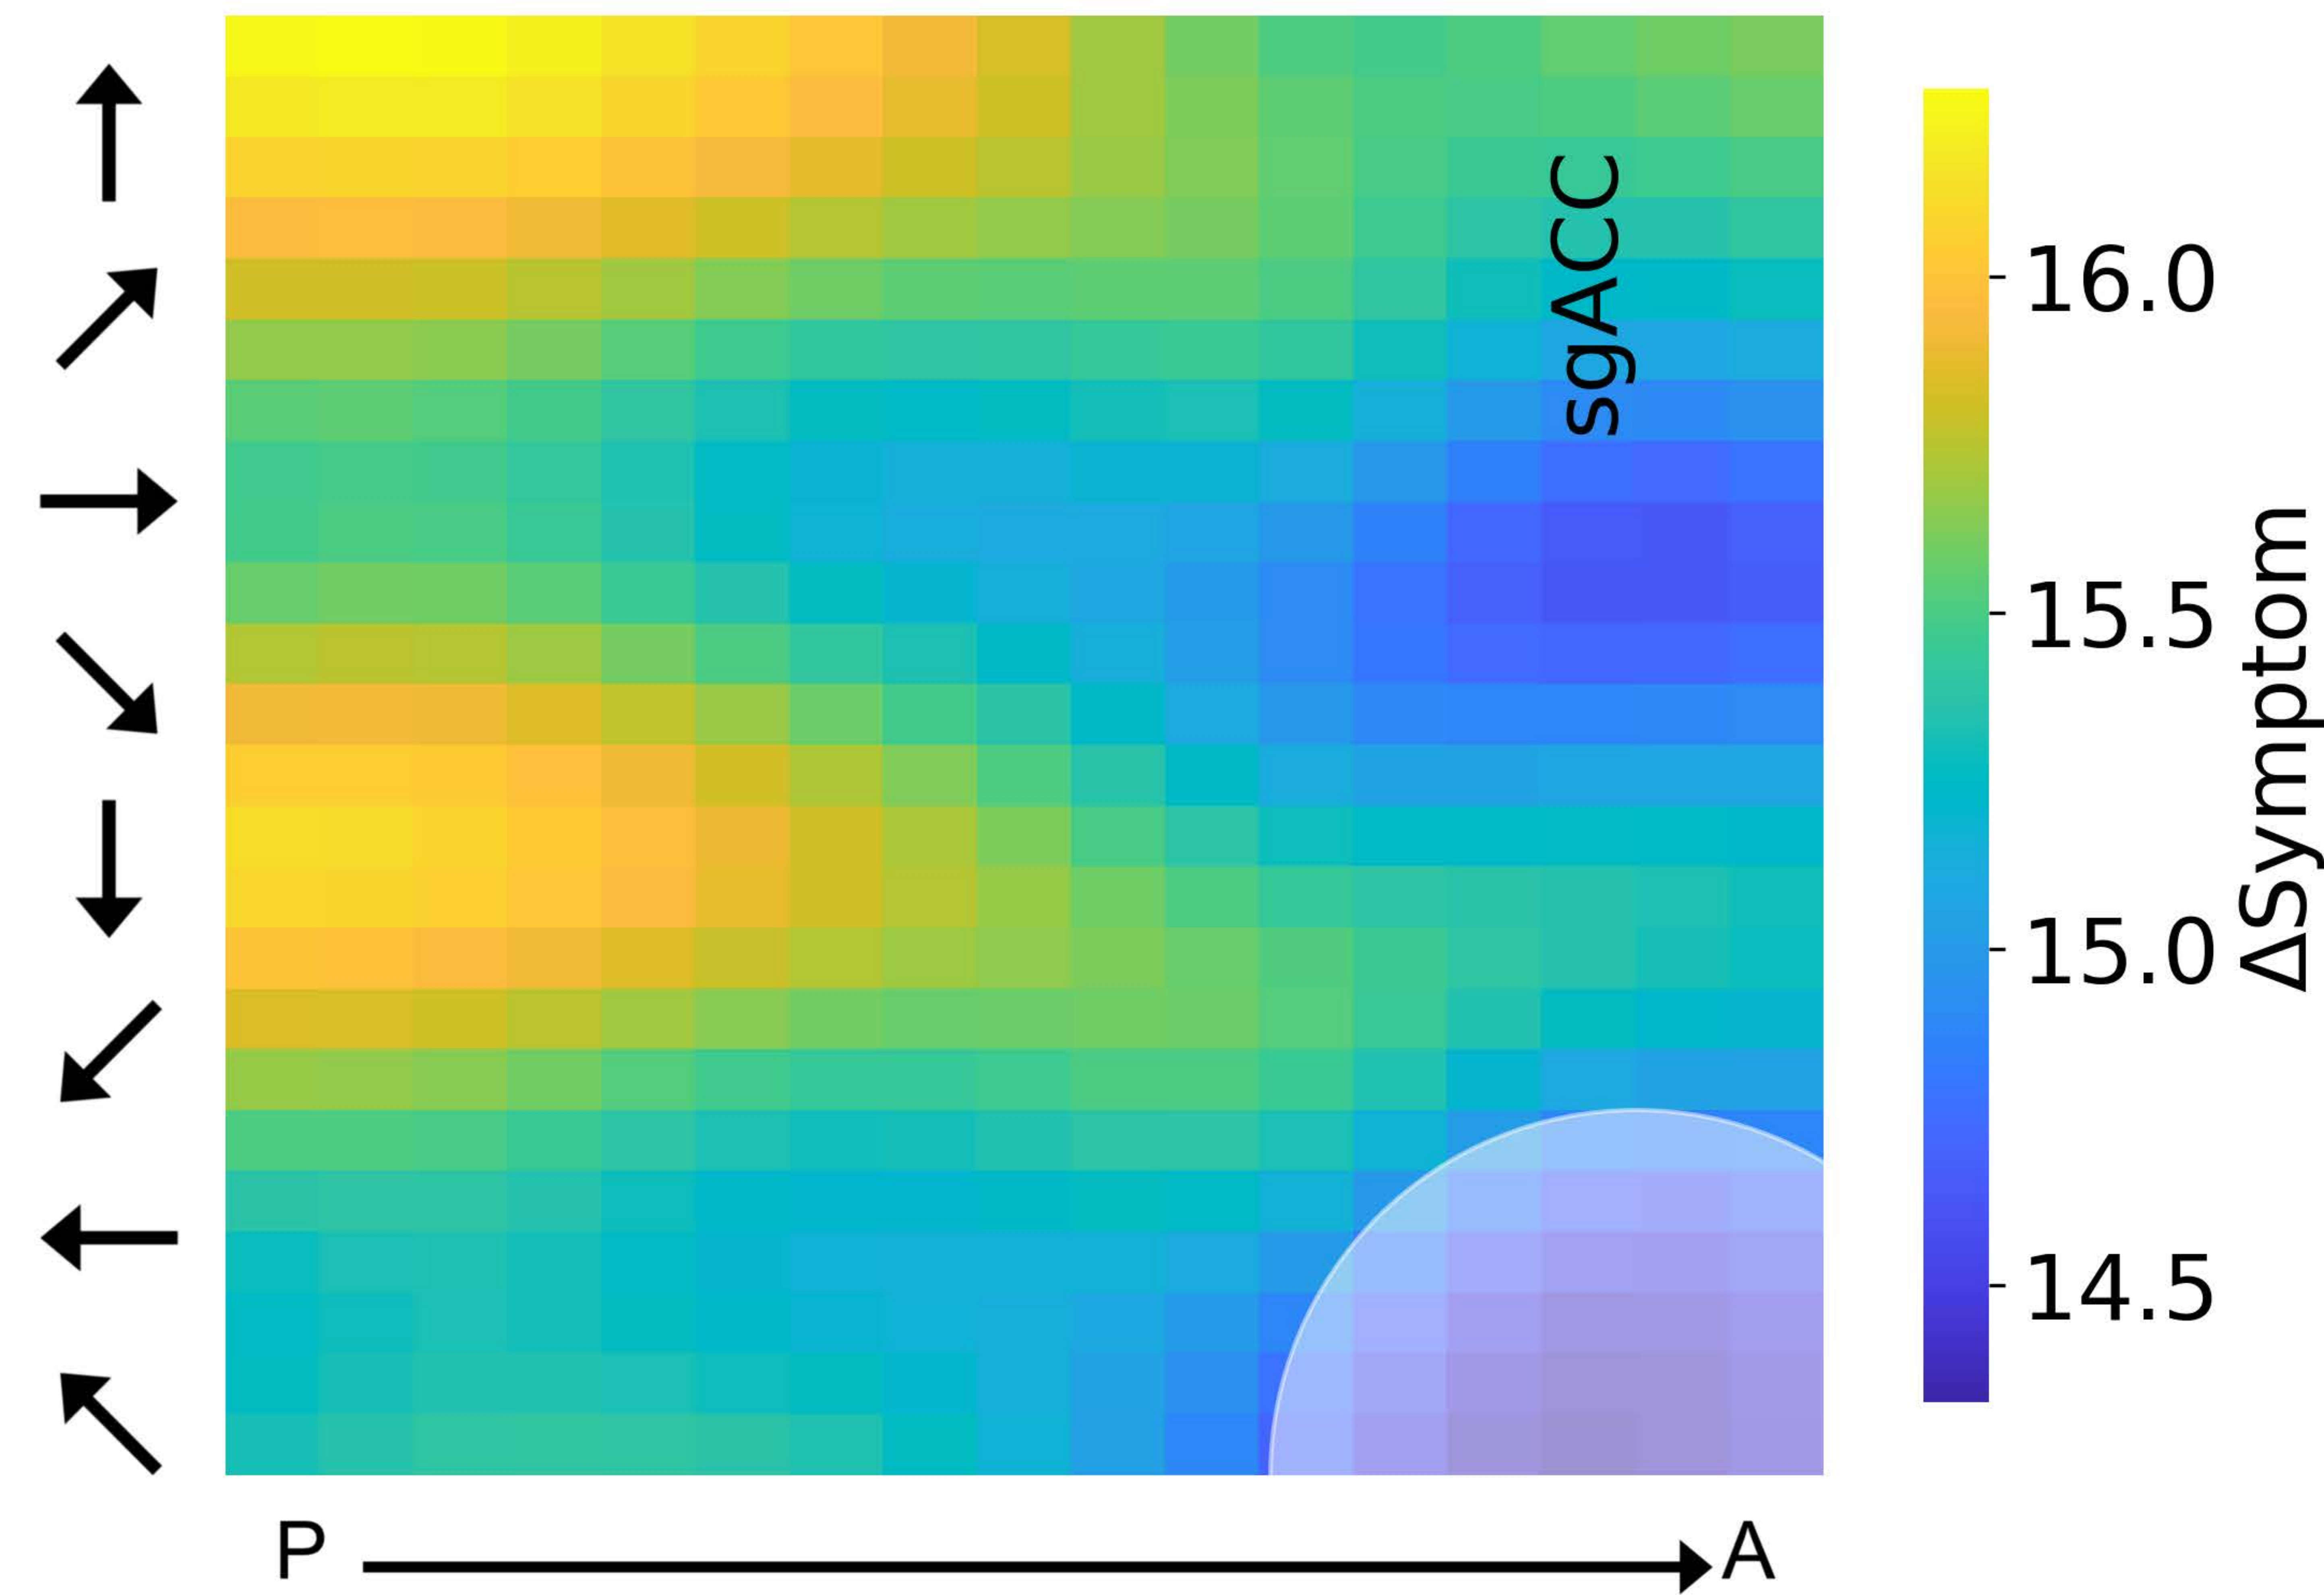



# NDARTZ590DYE\_madrs\_right\_dlpfc

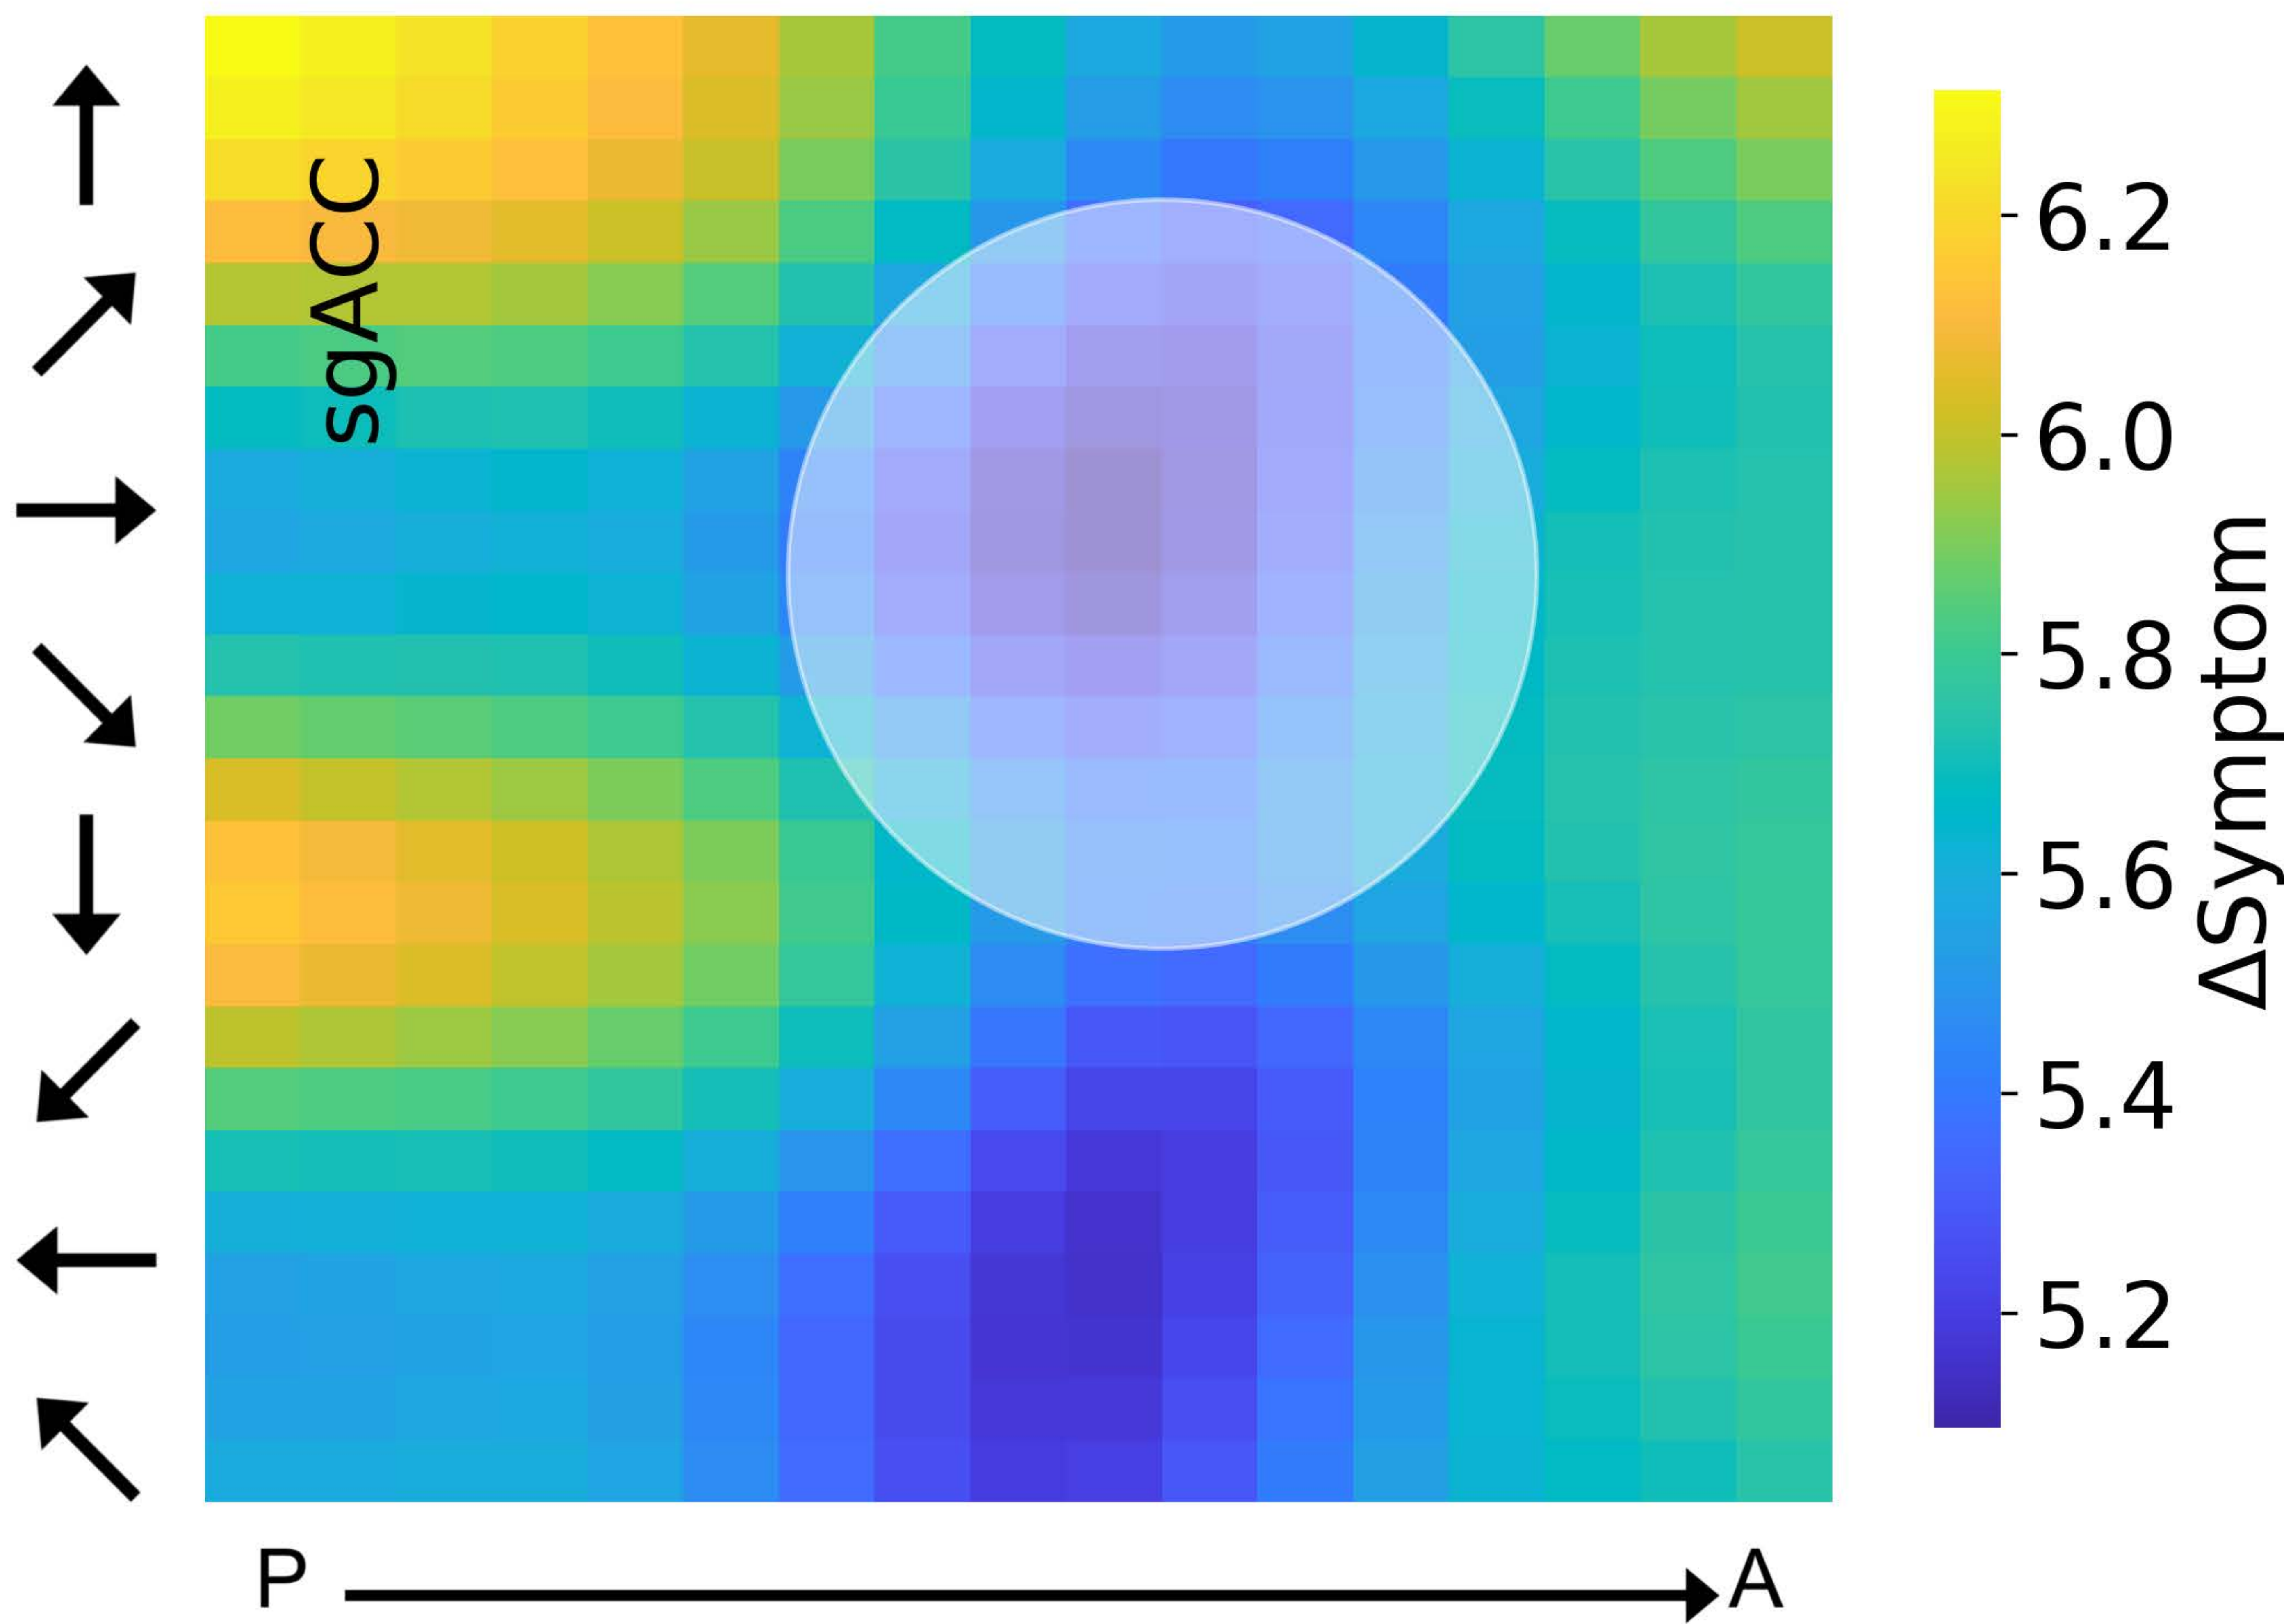



# NDARUJ223ZPN\_madrs\_right\_dlpfc

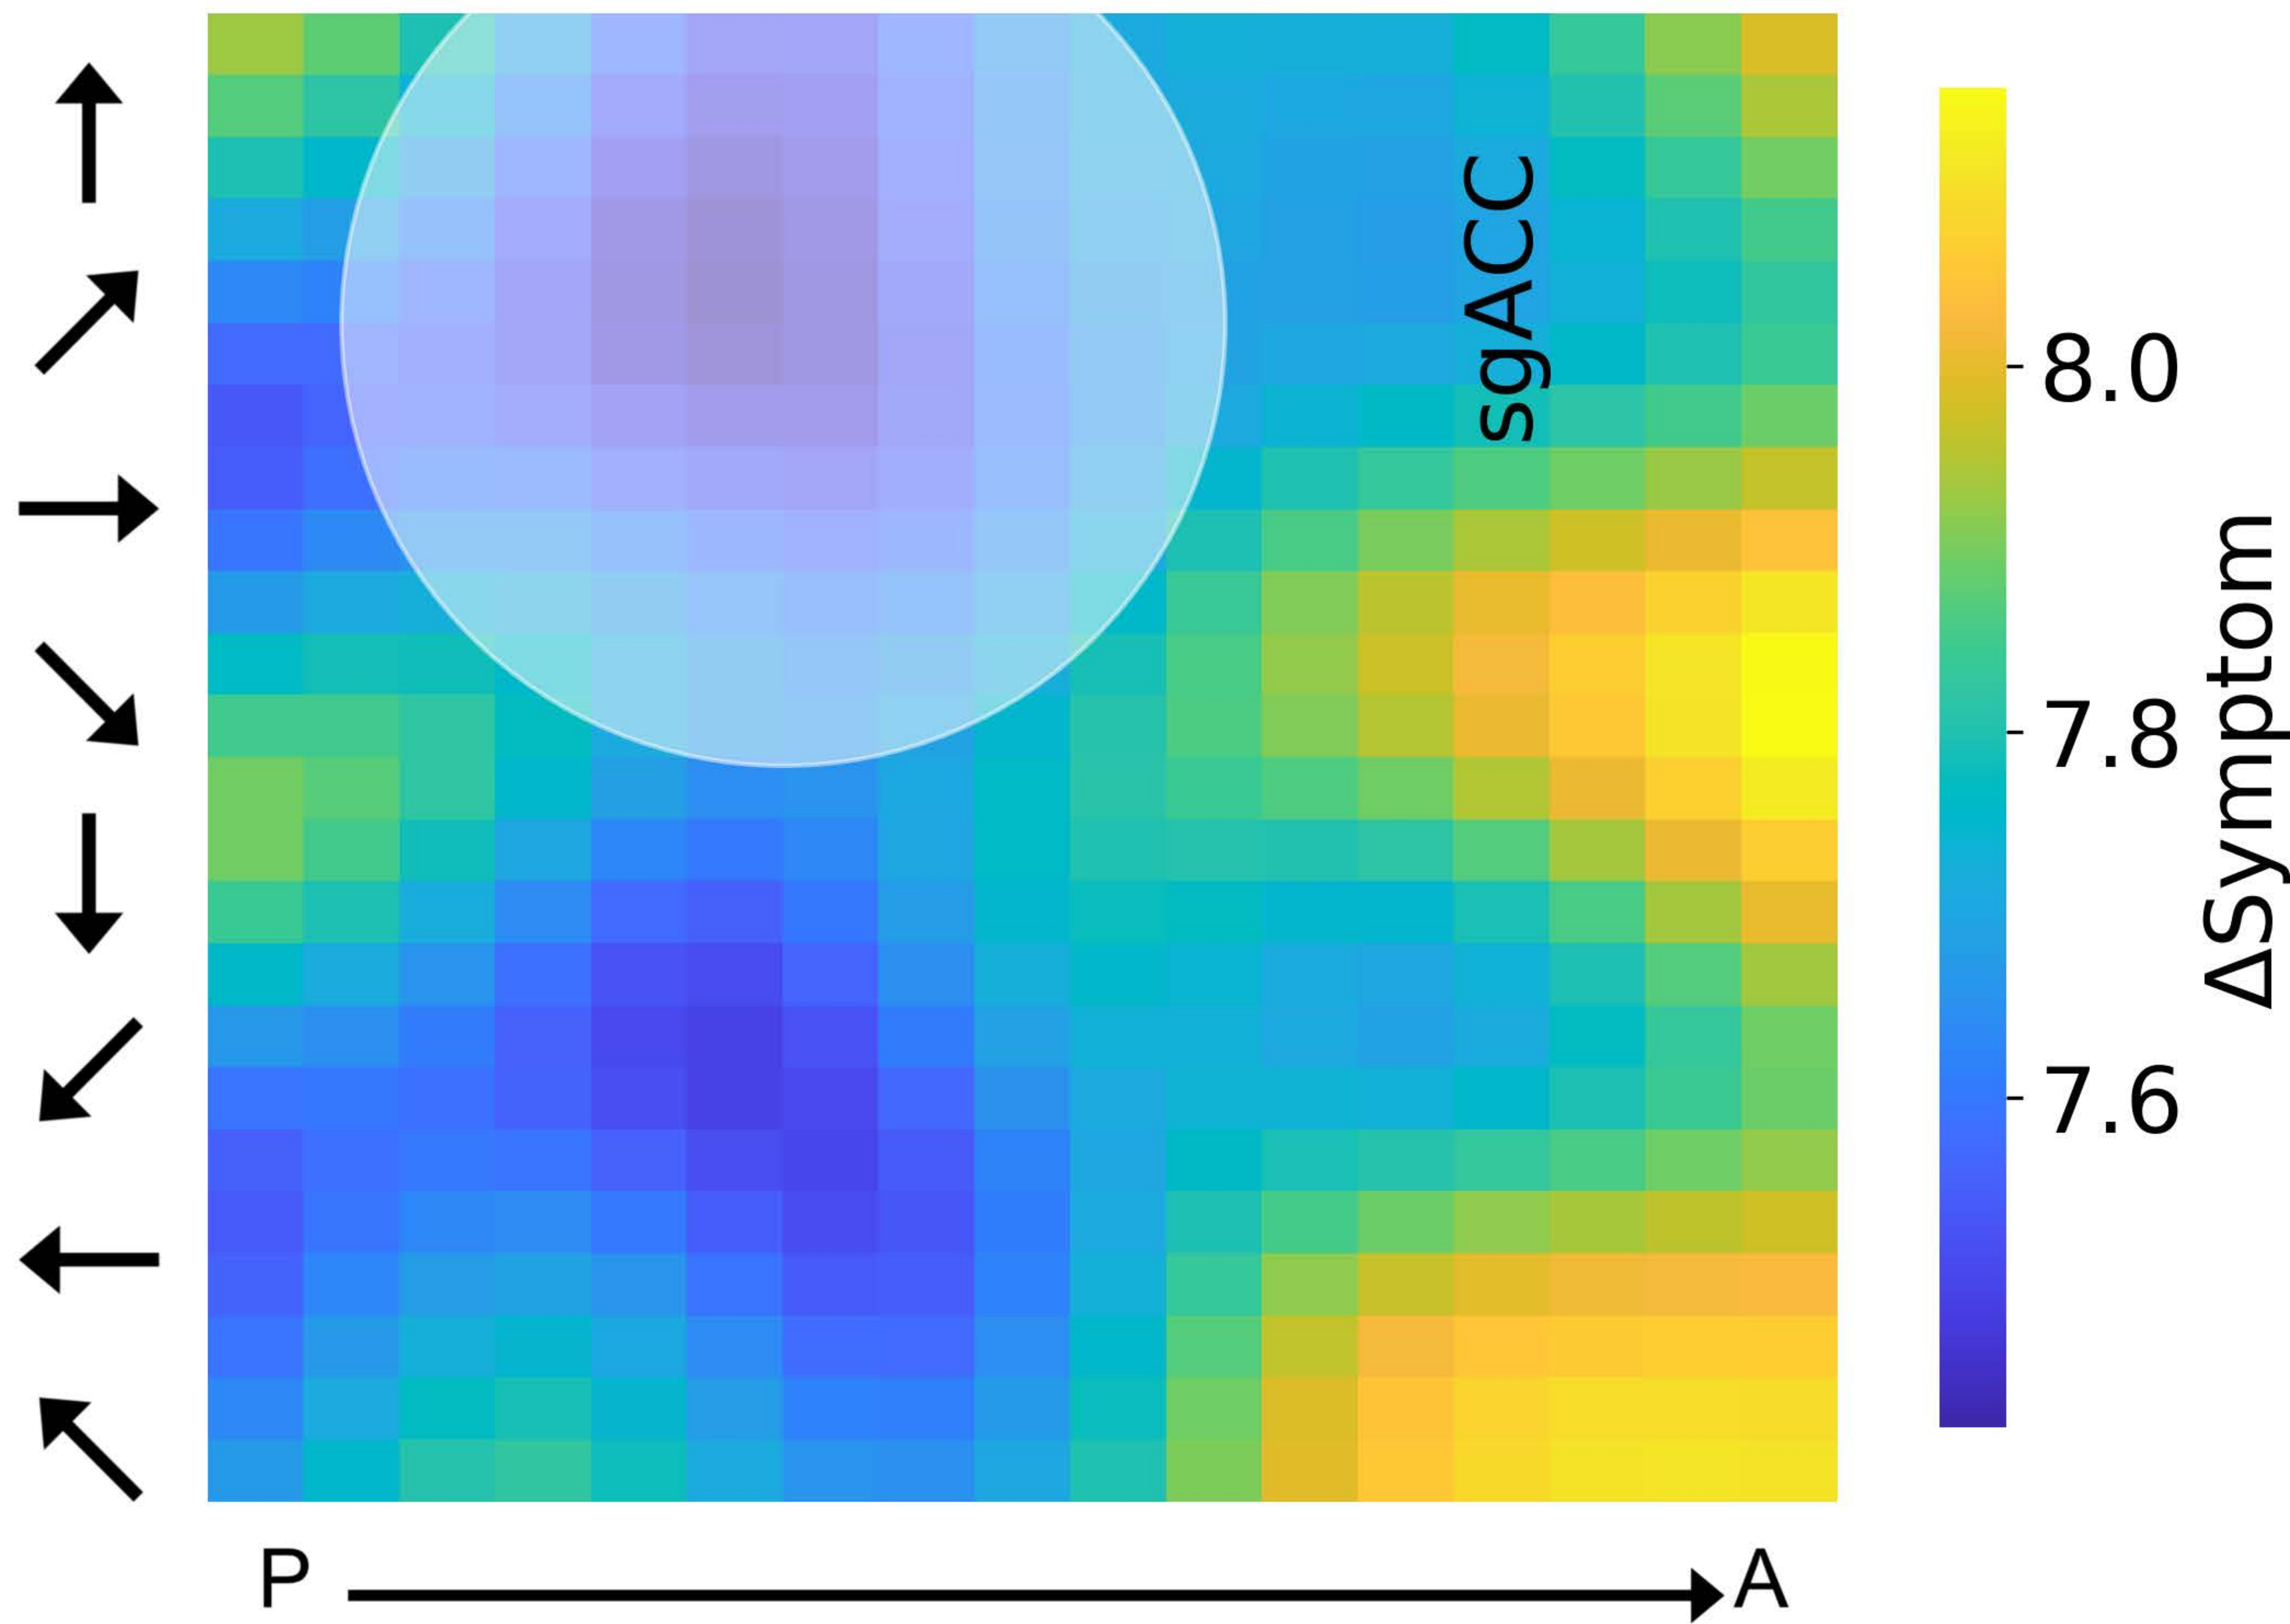



# NDARUM818JC1\_madrs\_right\_dlpfc

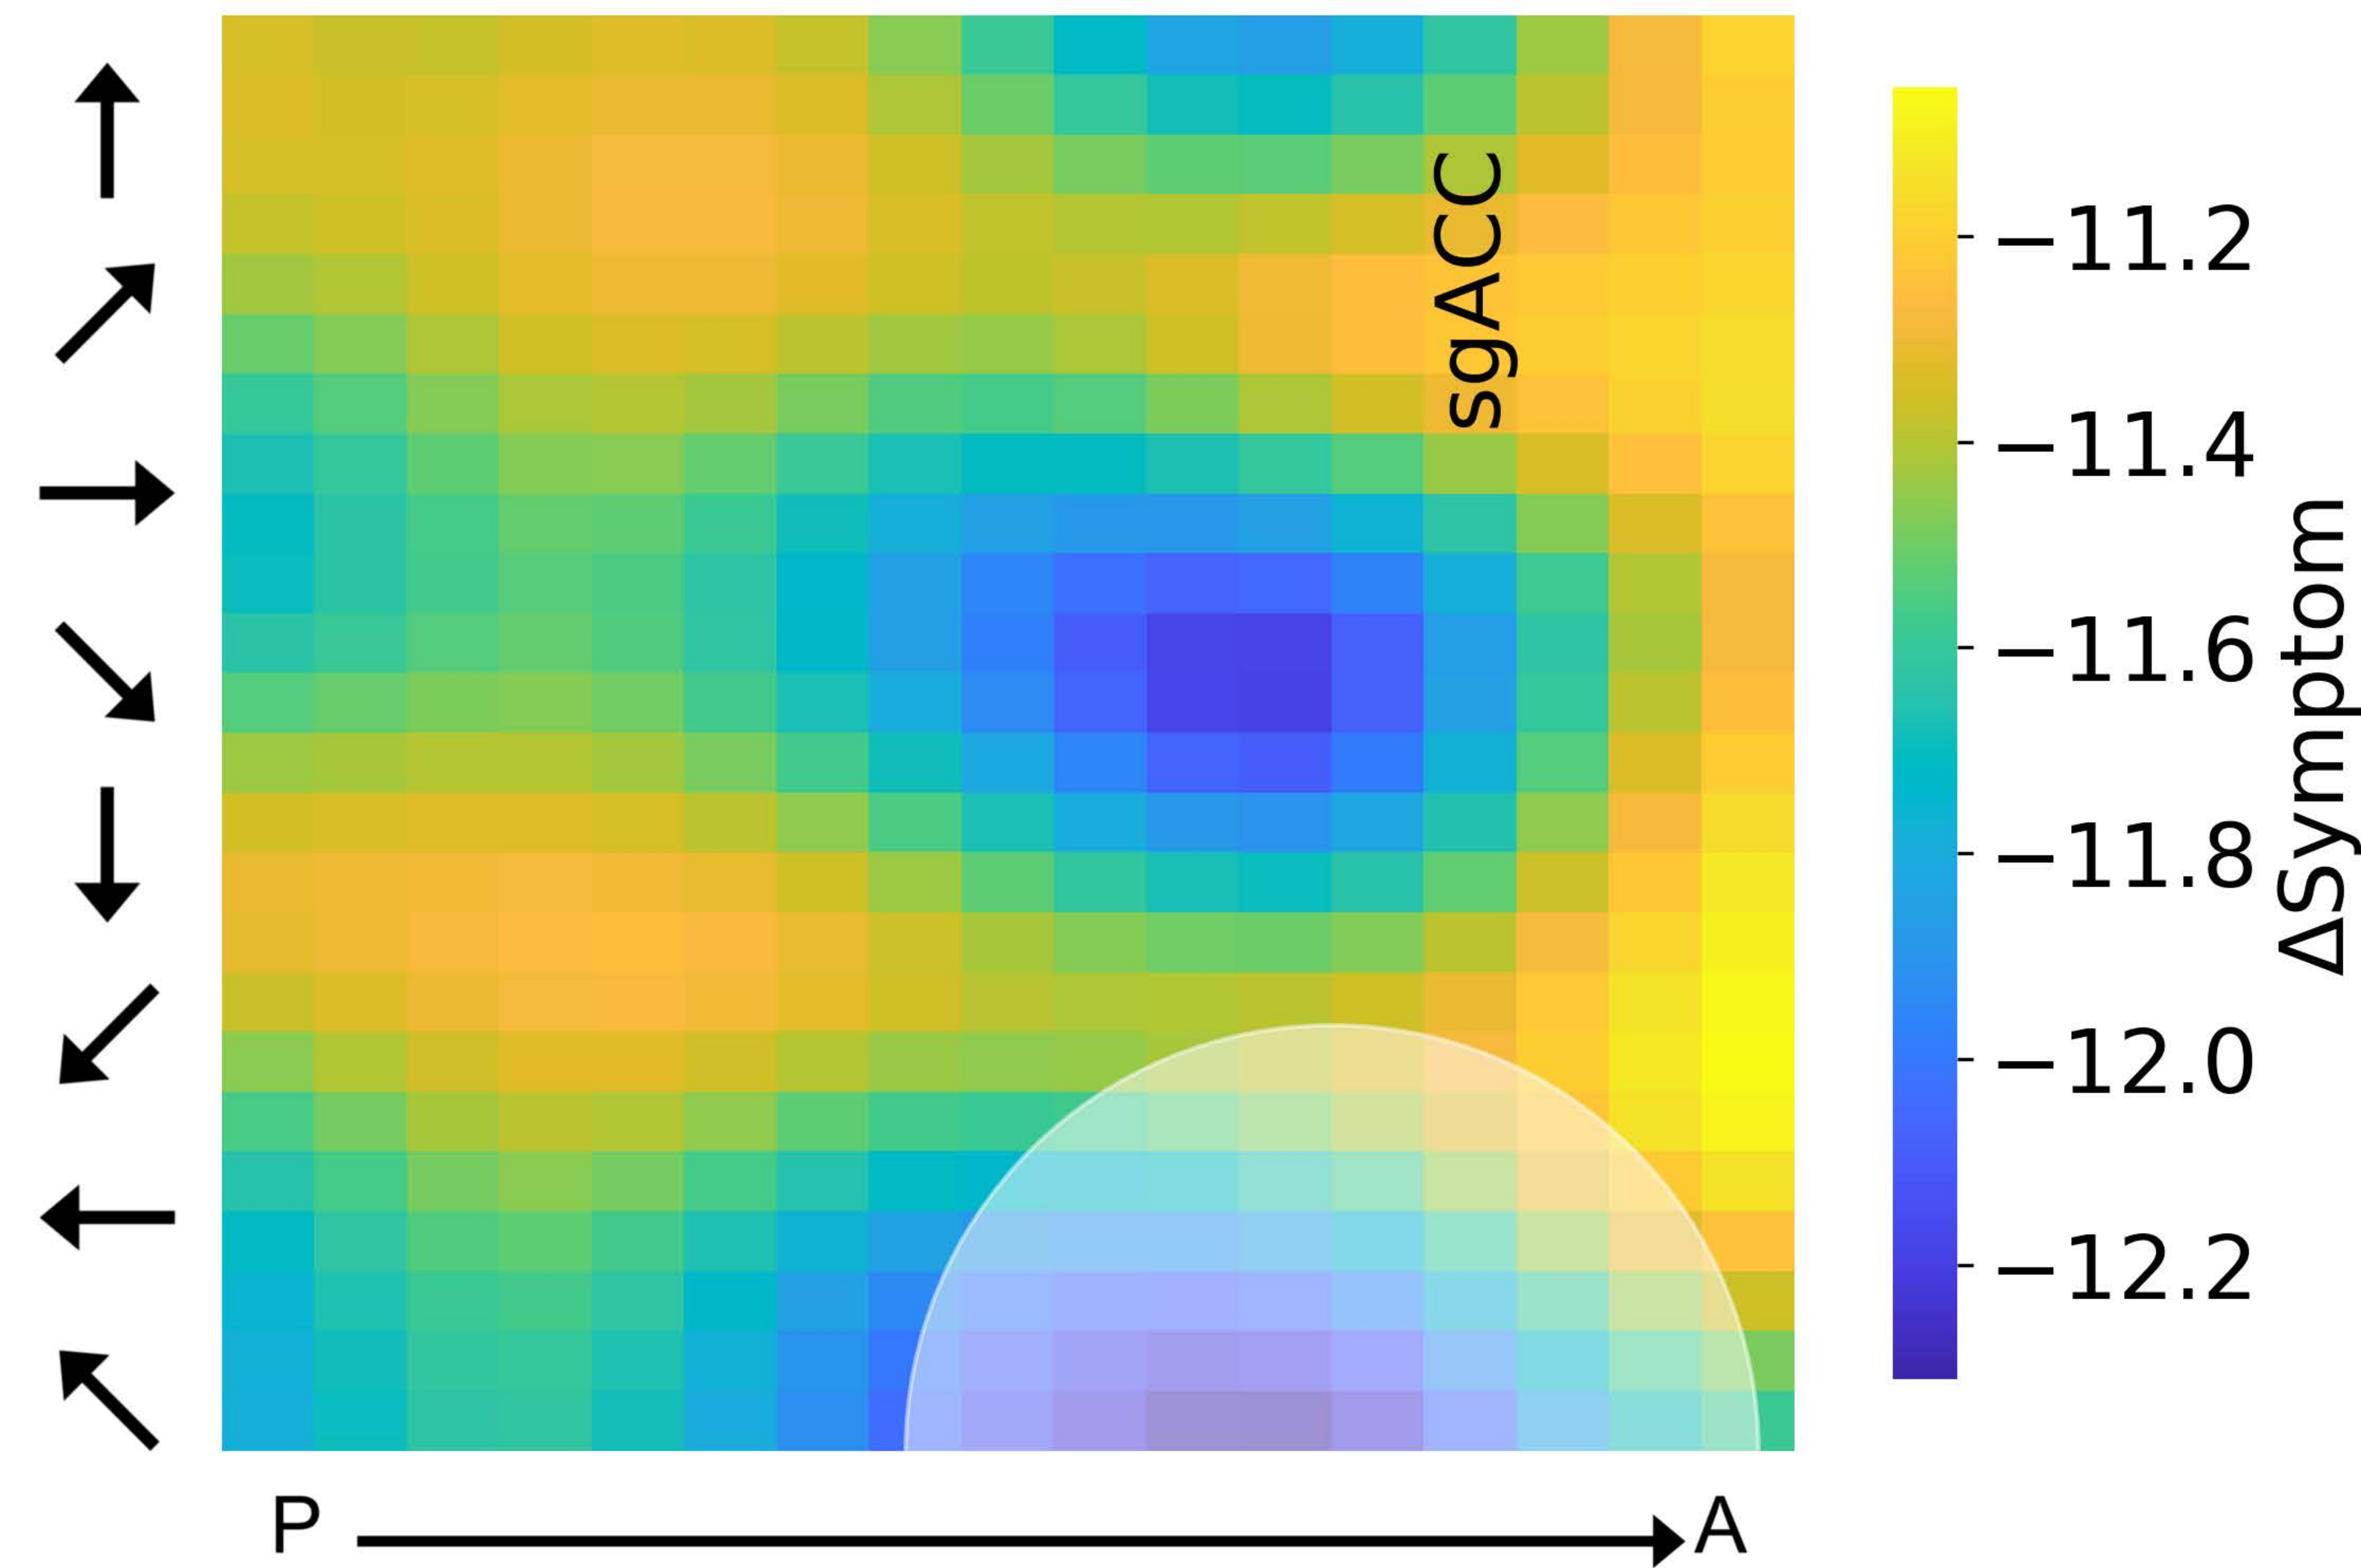



# INDARUT852KUX\_madr\_right\_dlpfc

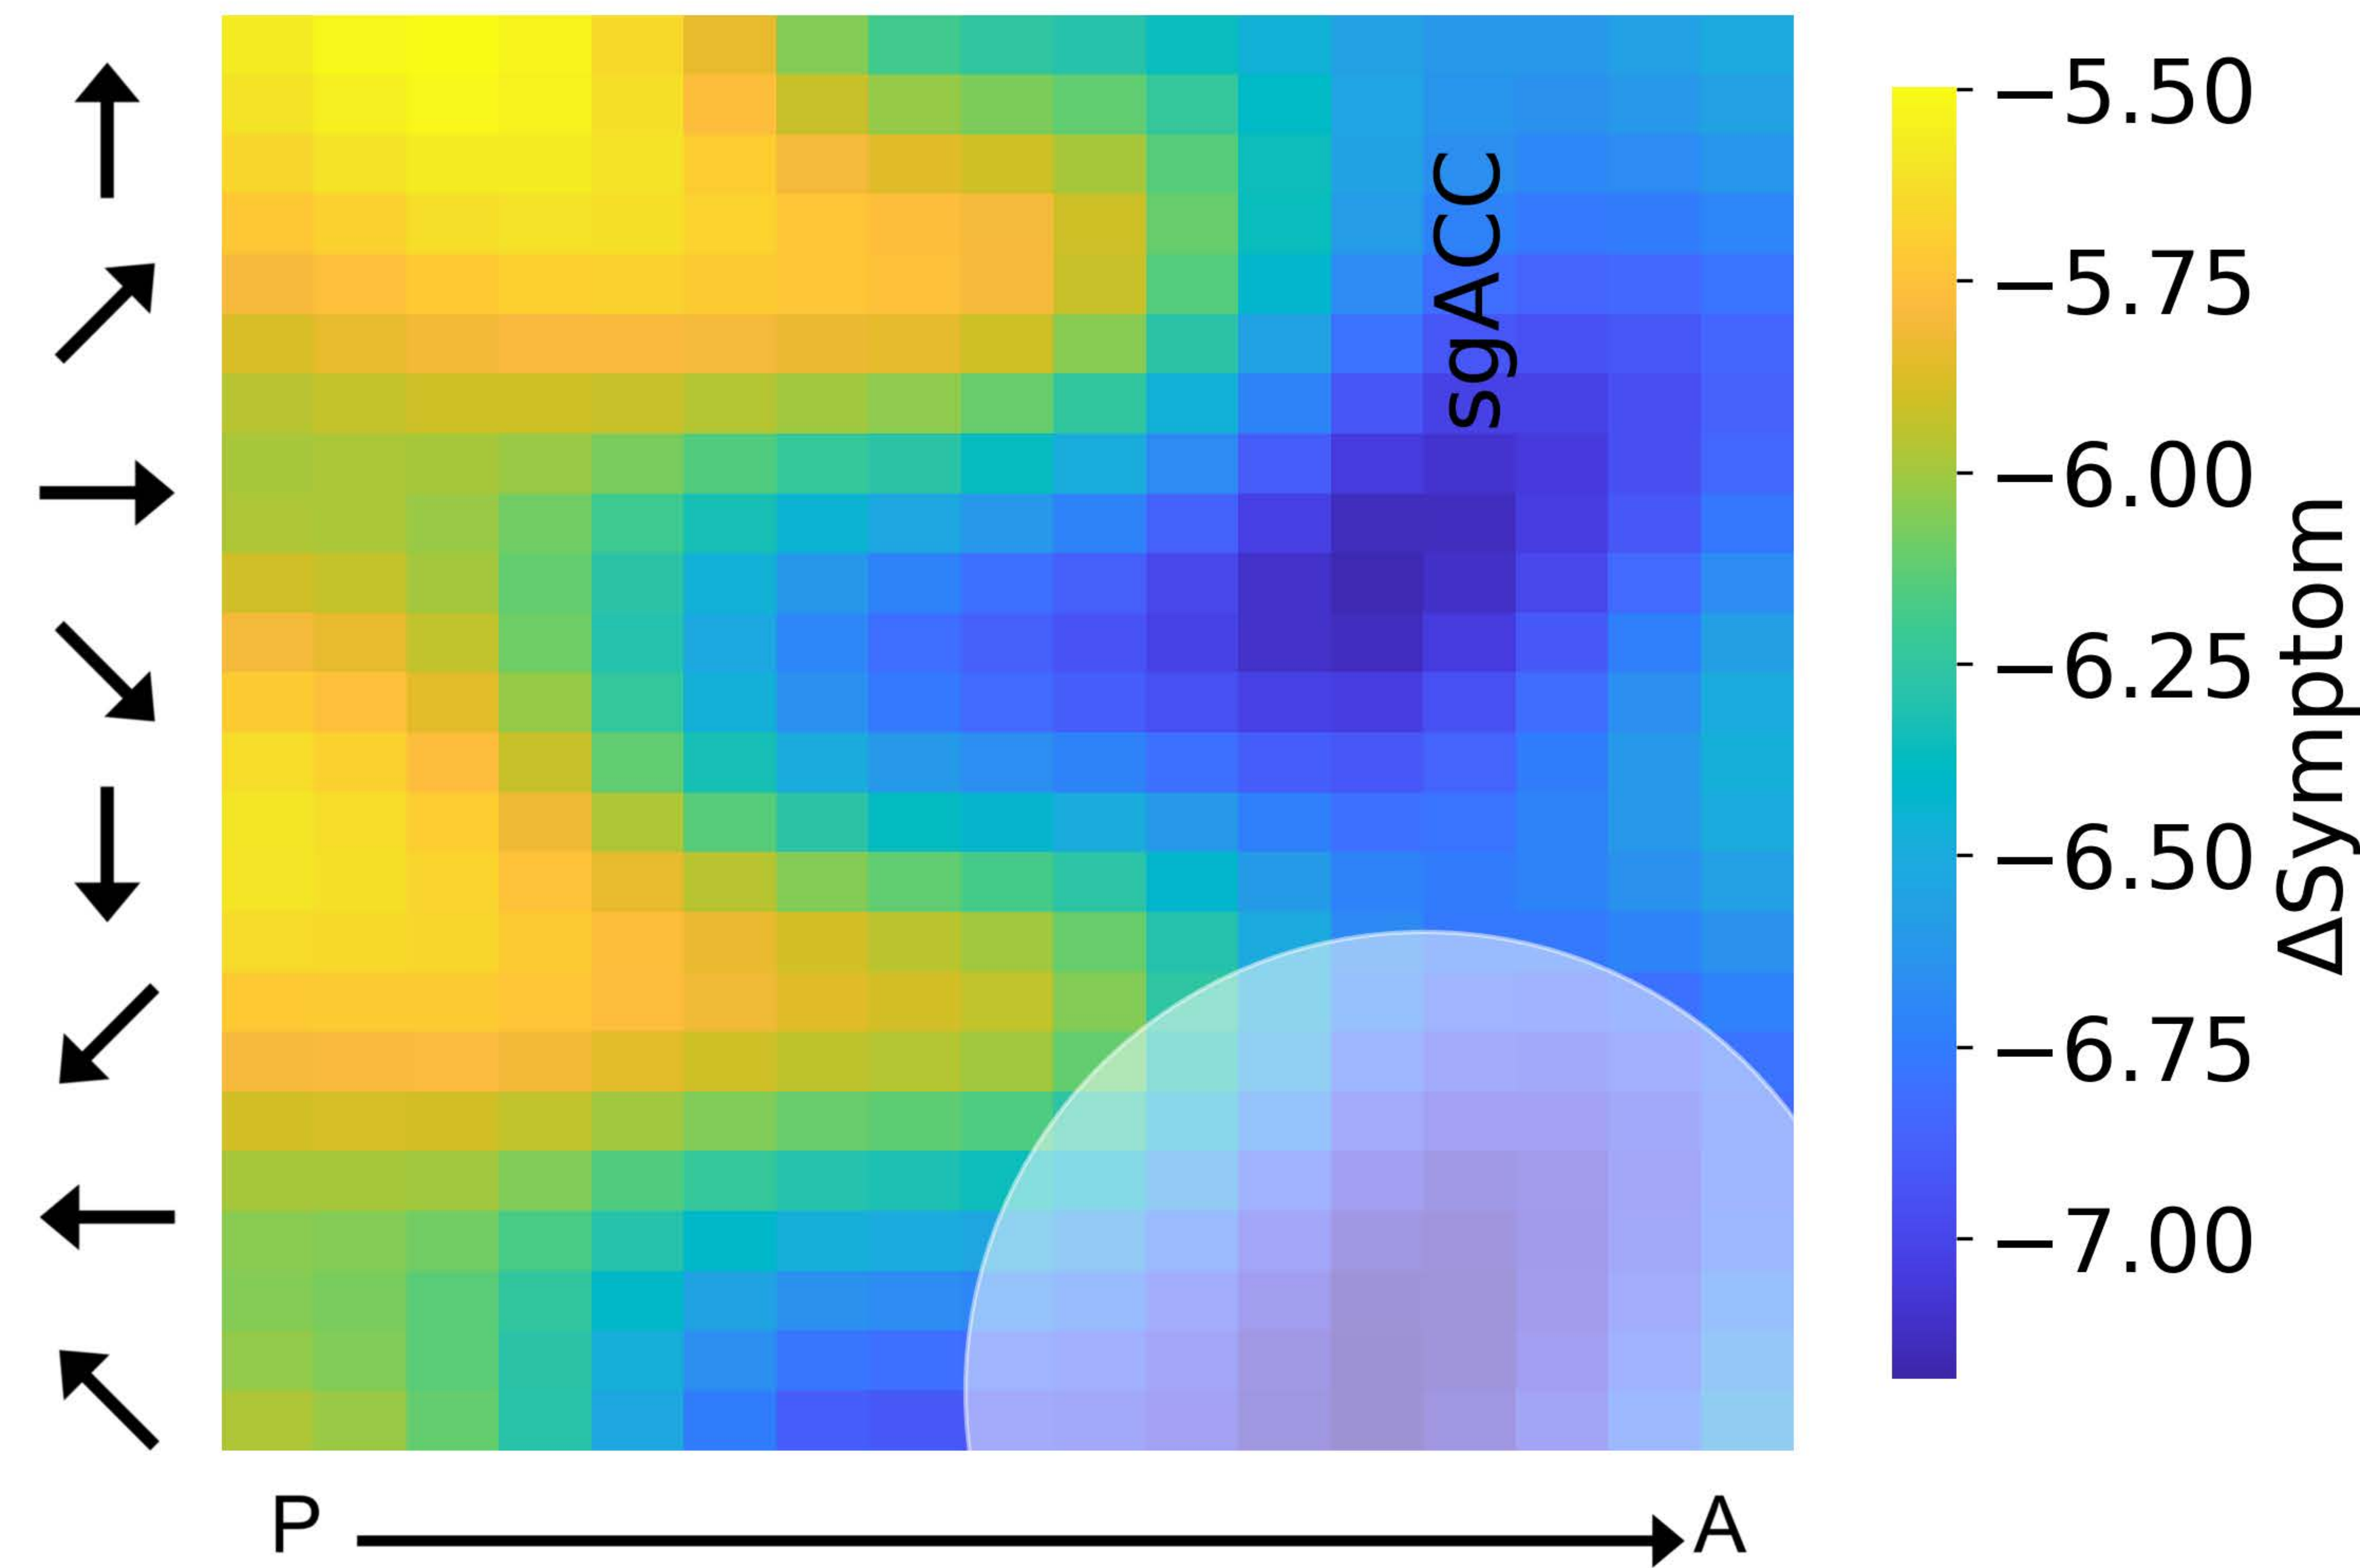



# INDARVE642FAN\_madr\_right\_dlpfc

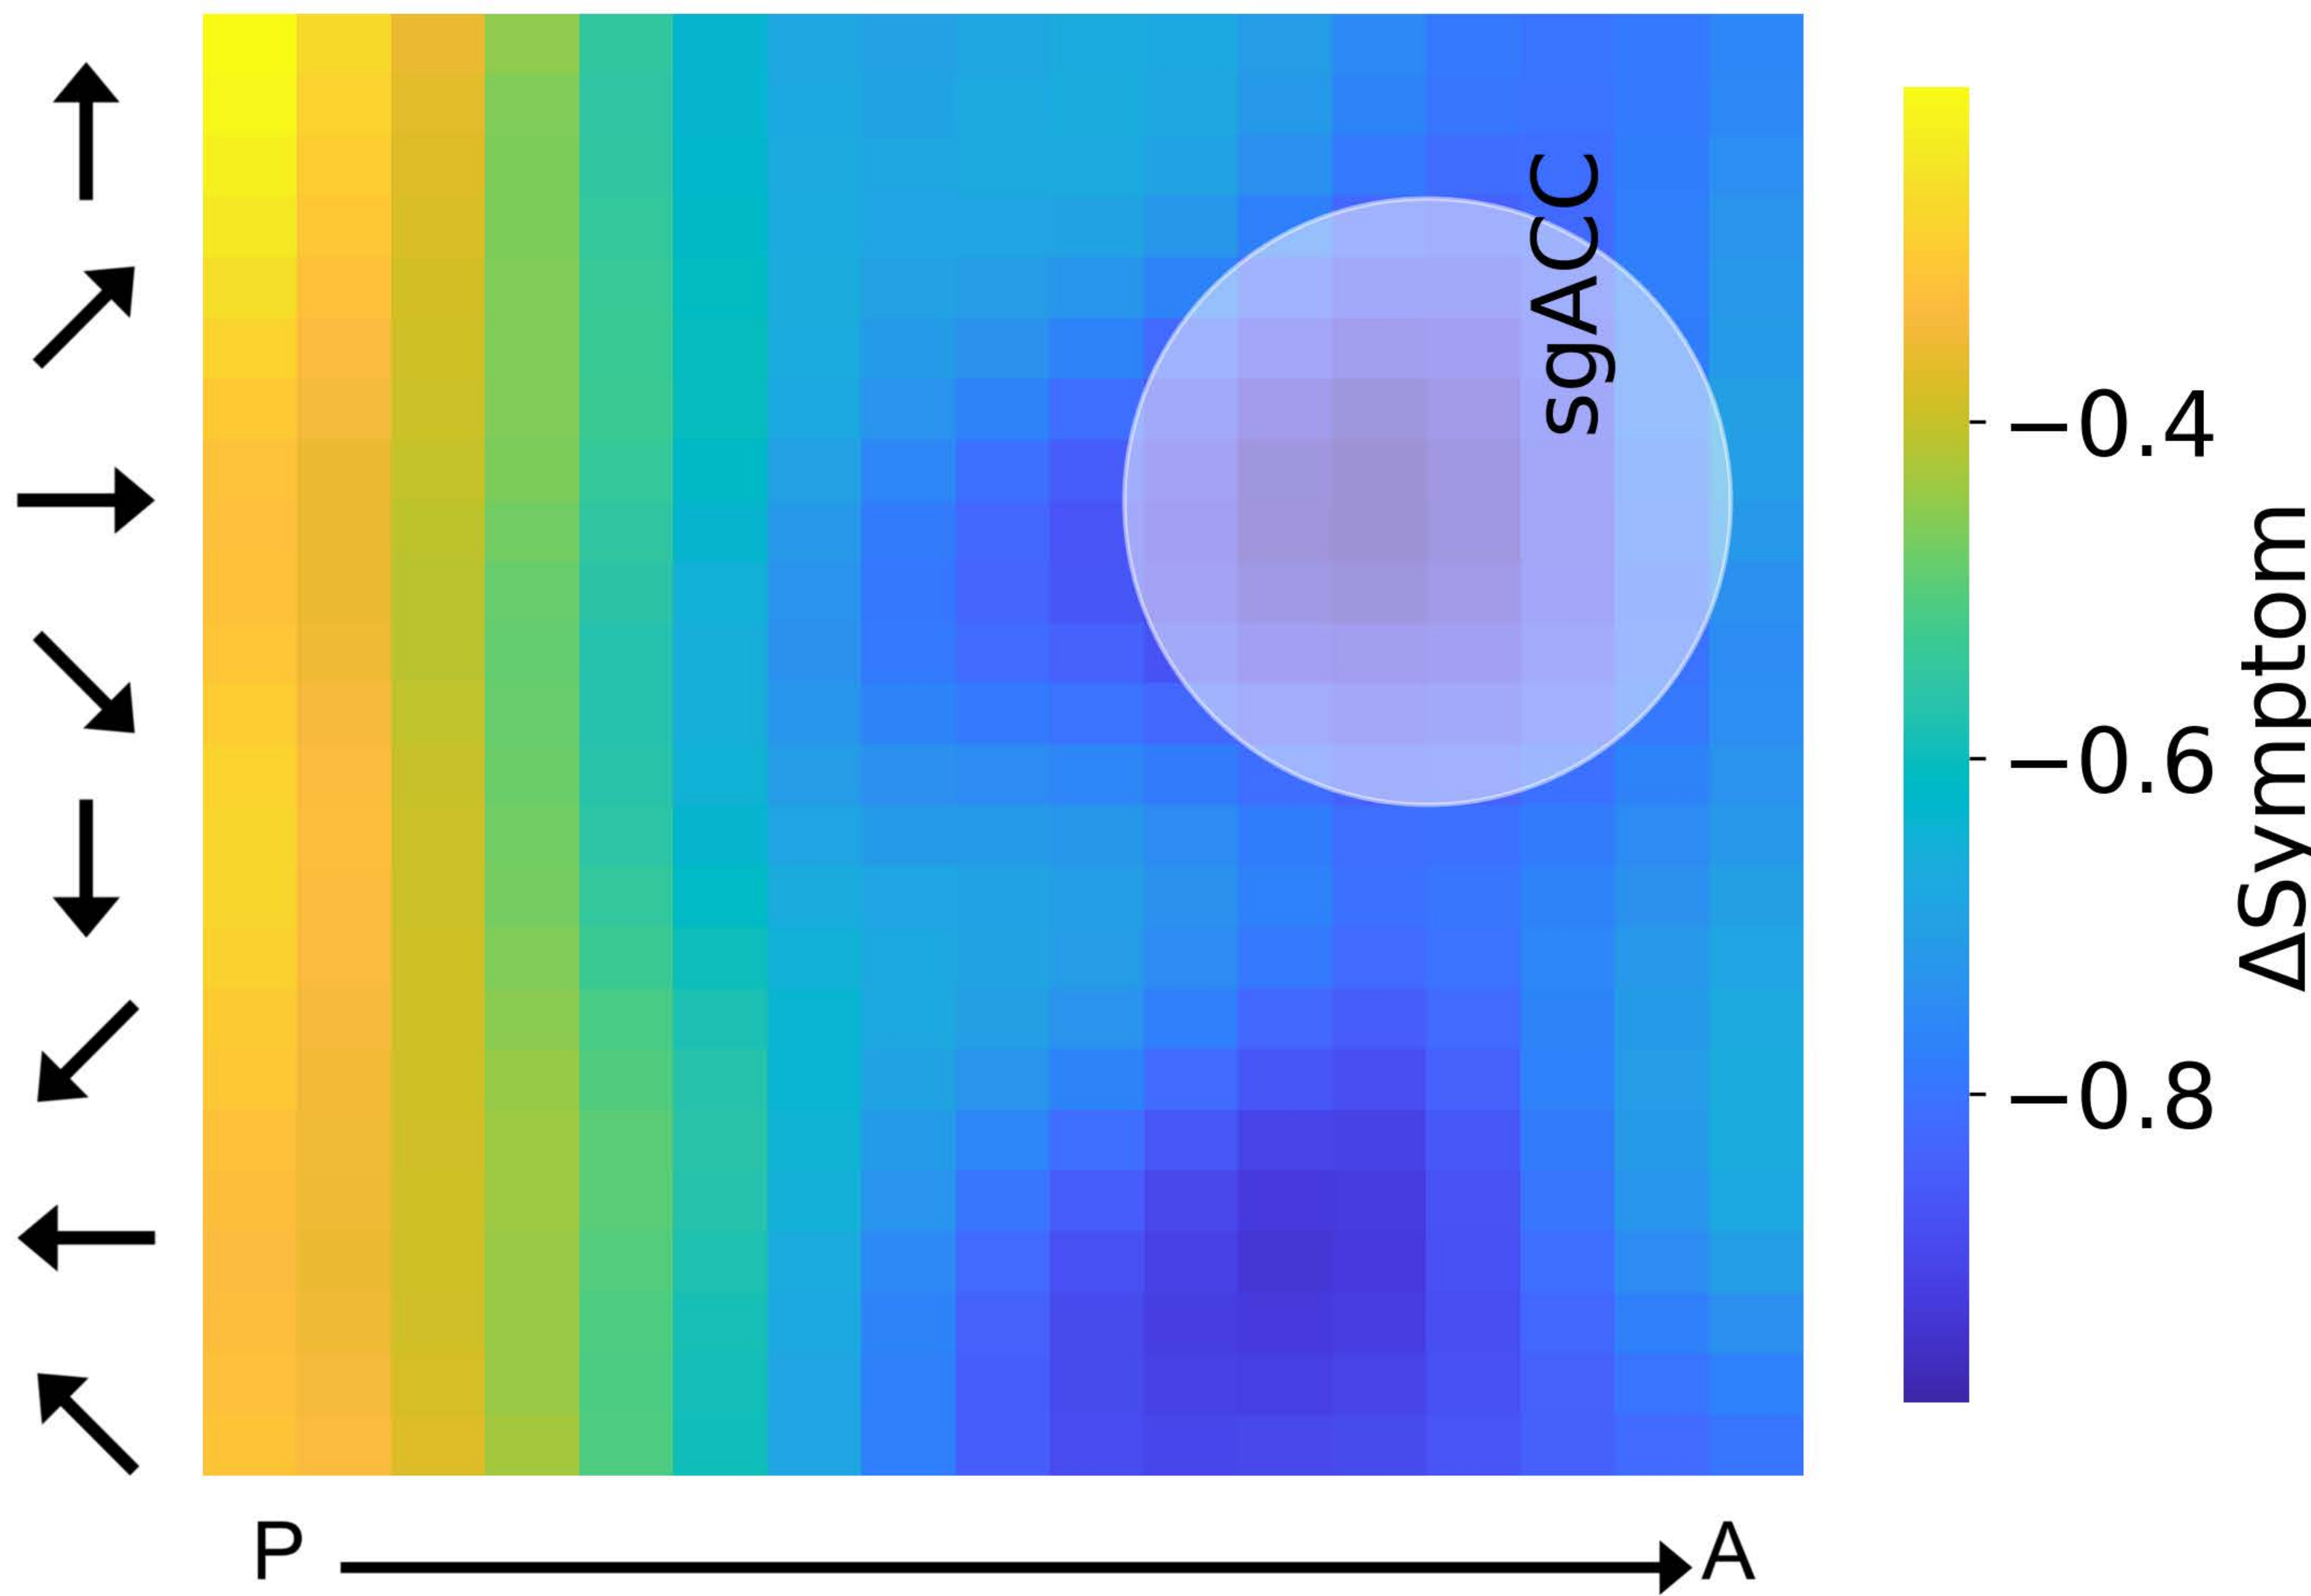



# NDARVL144YVF\_madrs\_right\_dlpfc

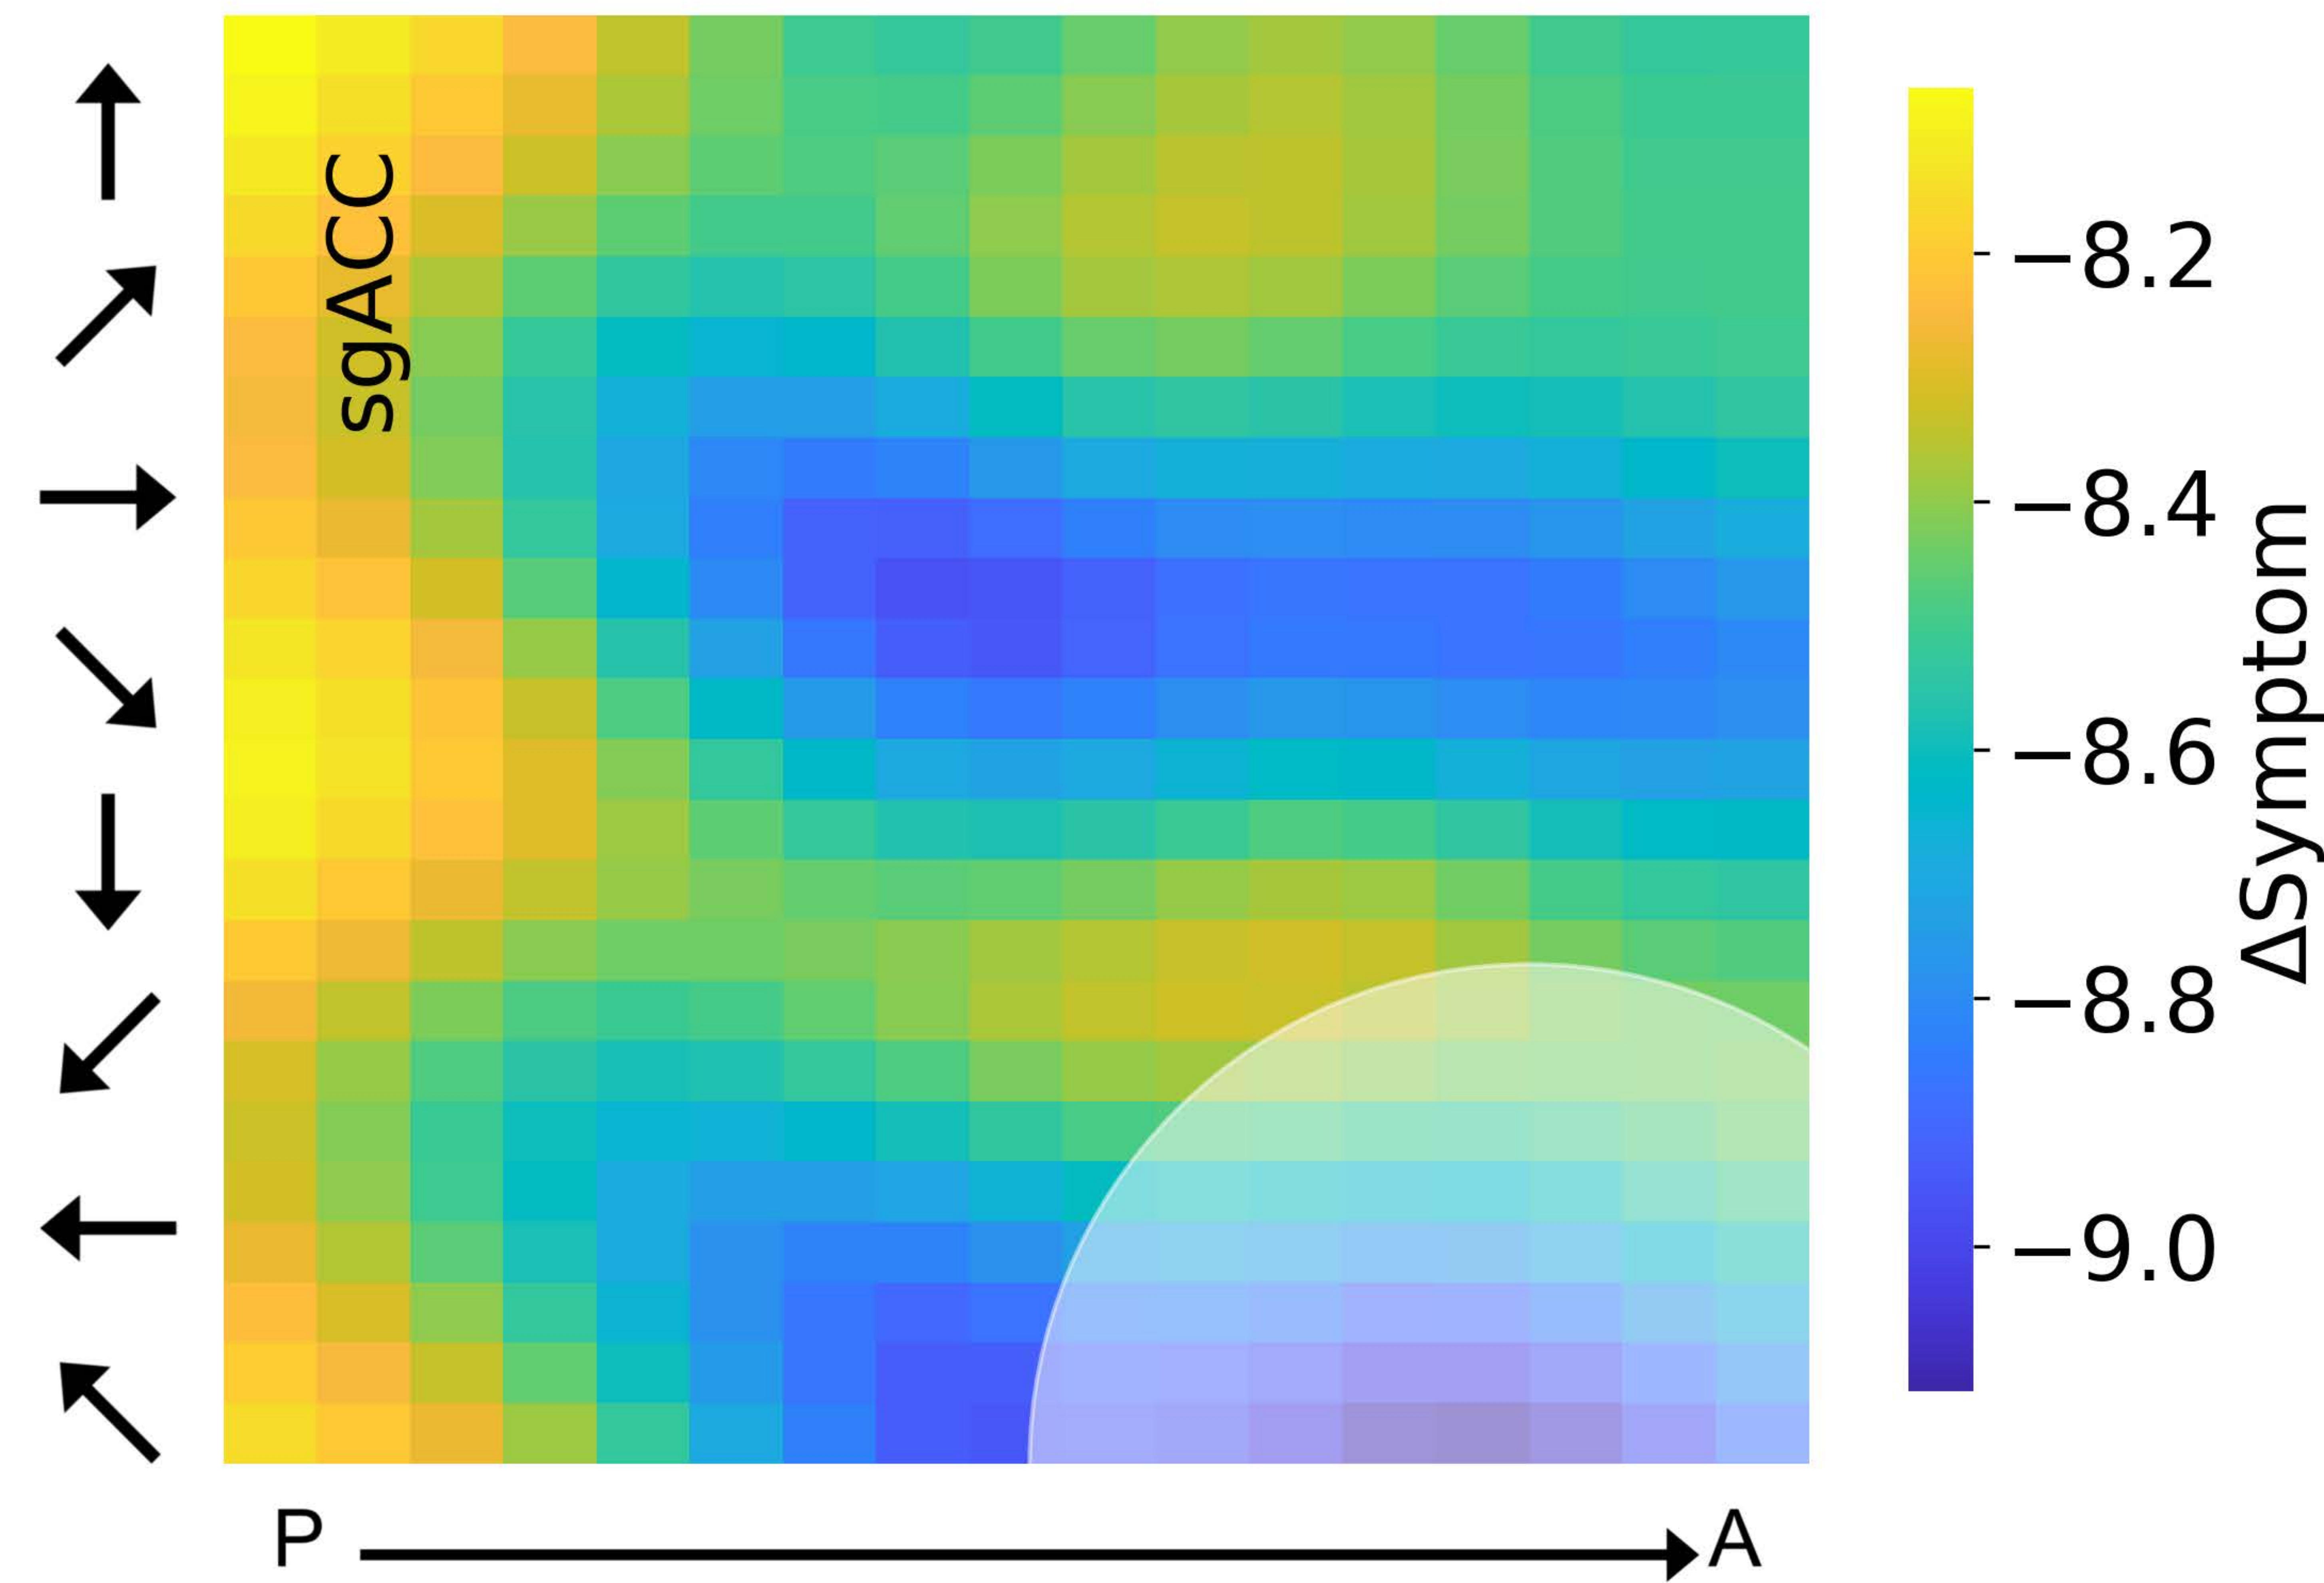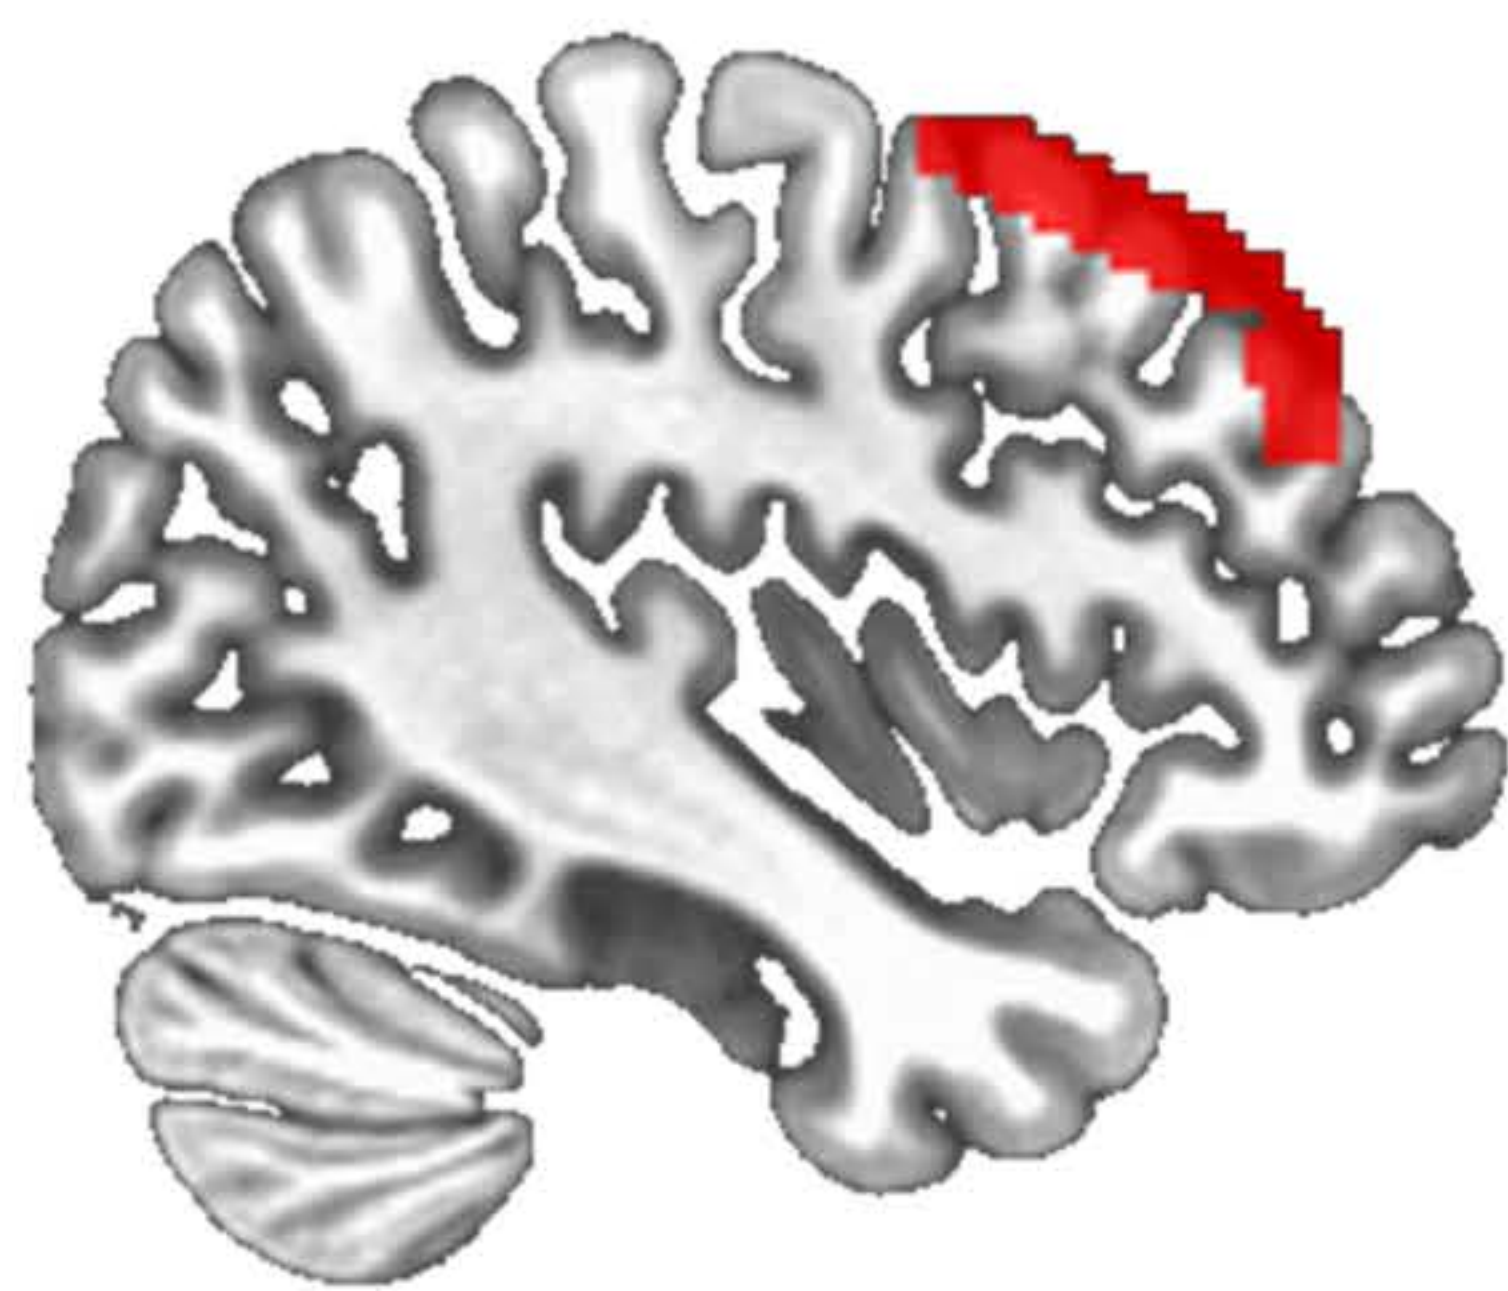



# INDARWH523DTV\_madr\_s\_right\_dlpfc

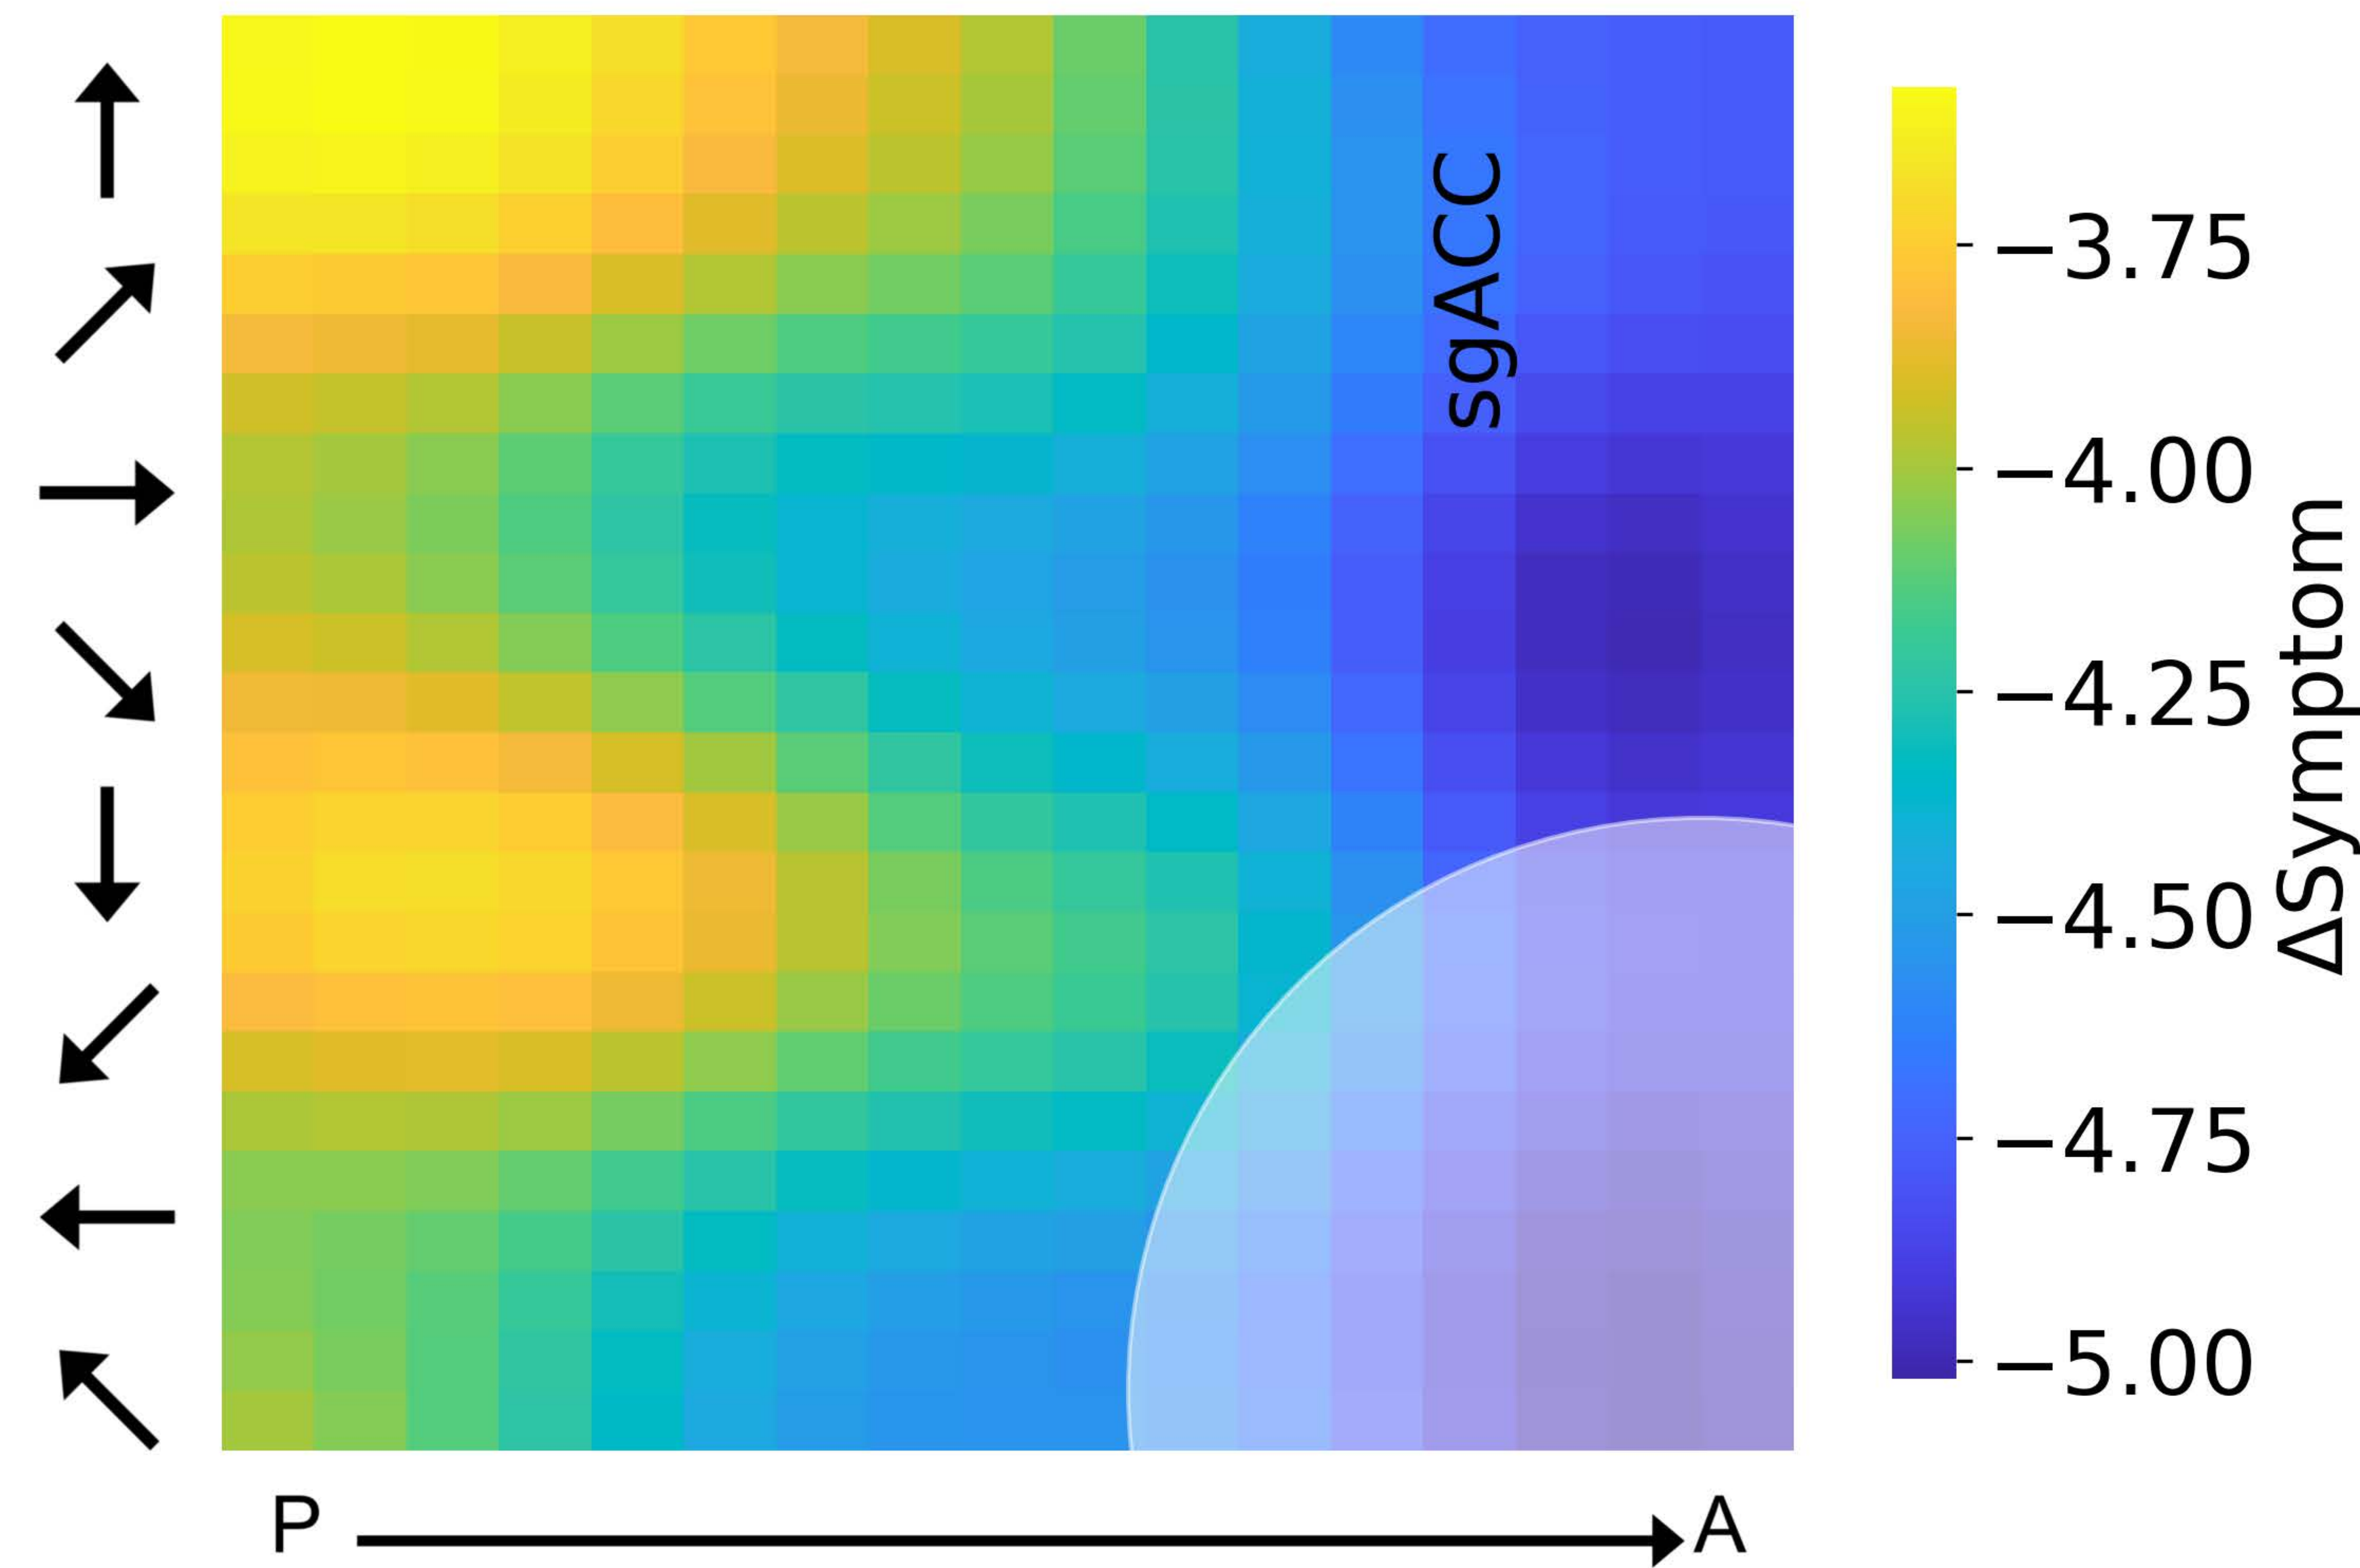



# INDARWJ818VXA\_madrs\_right\_dlpfc

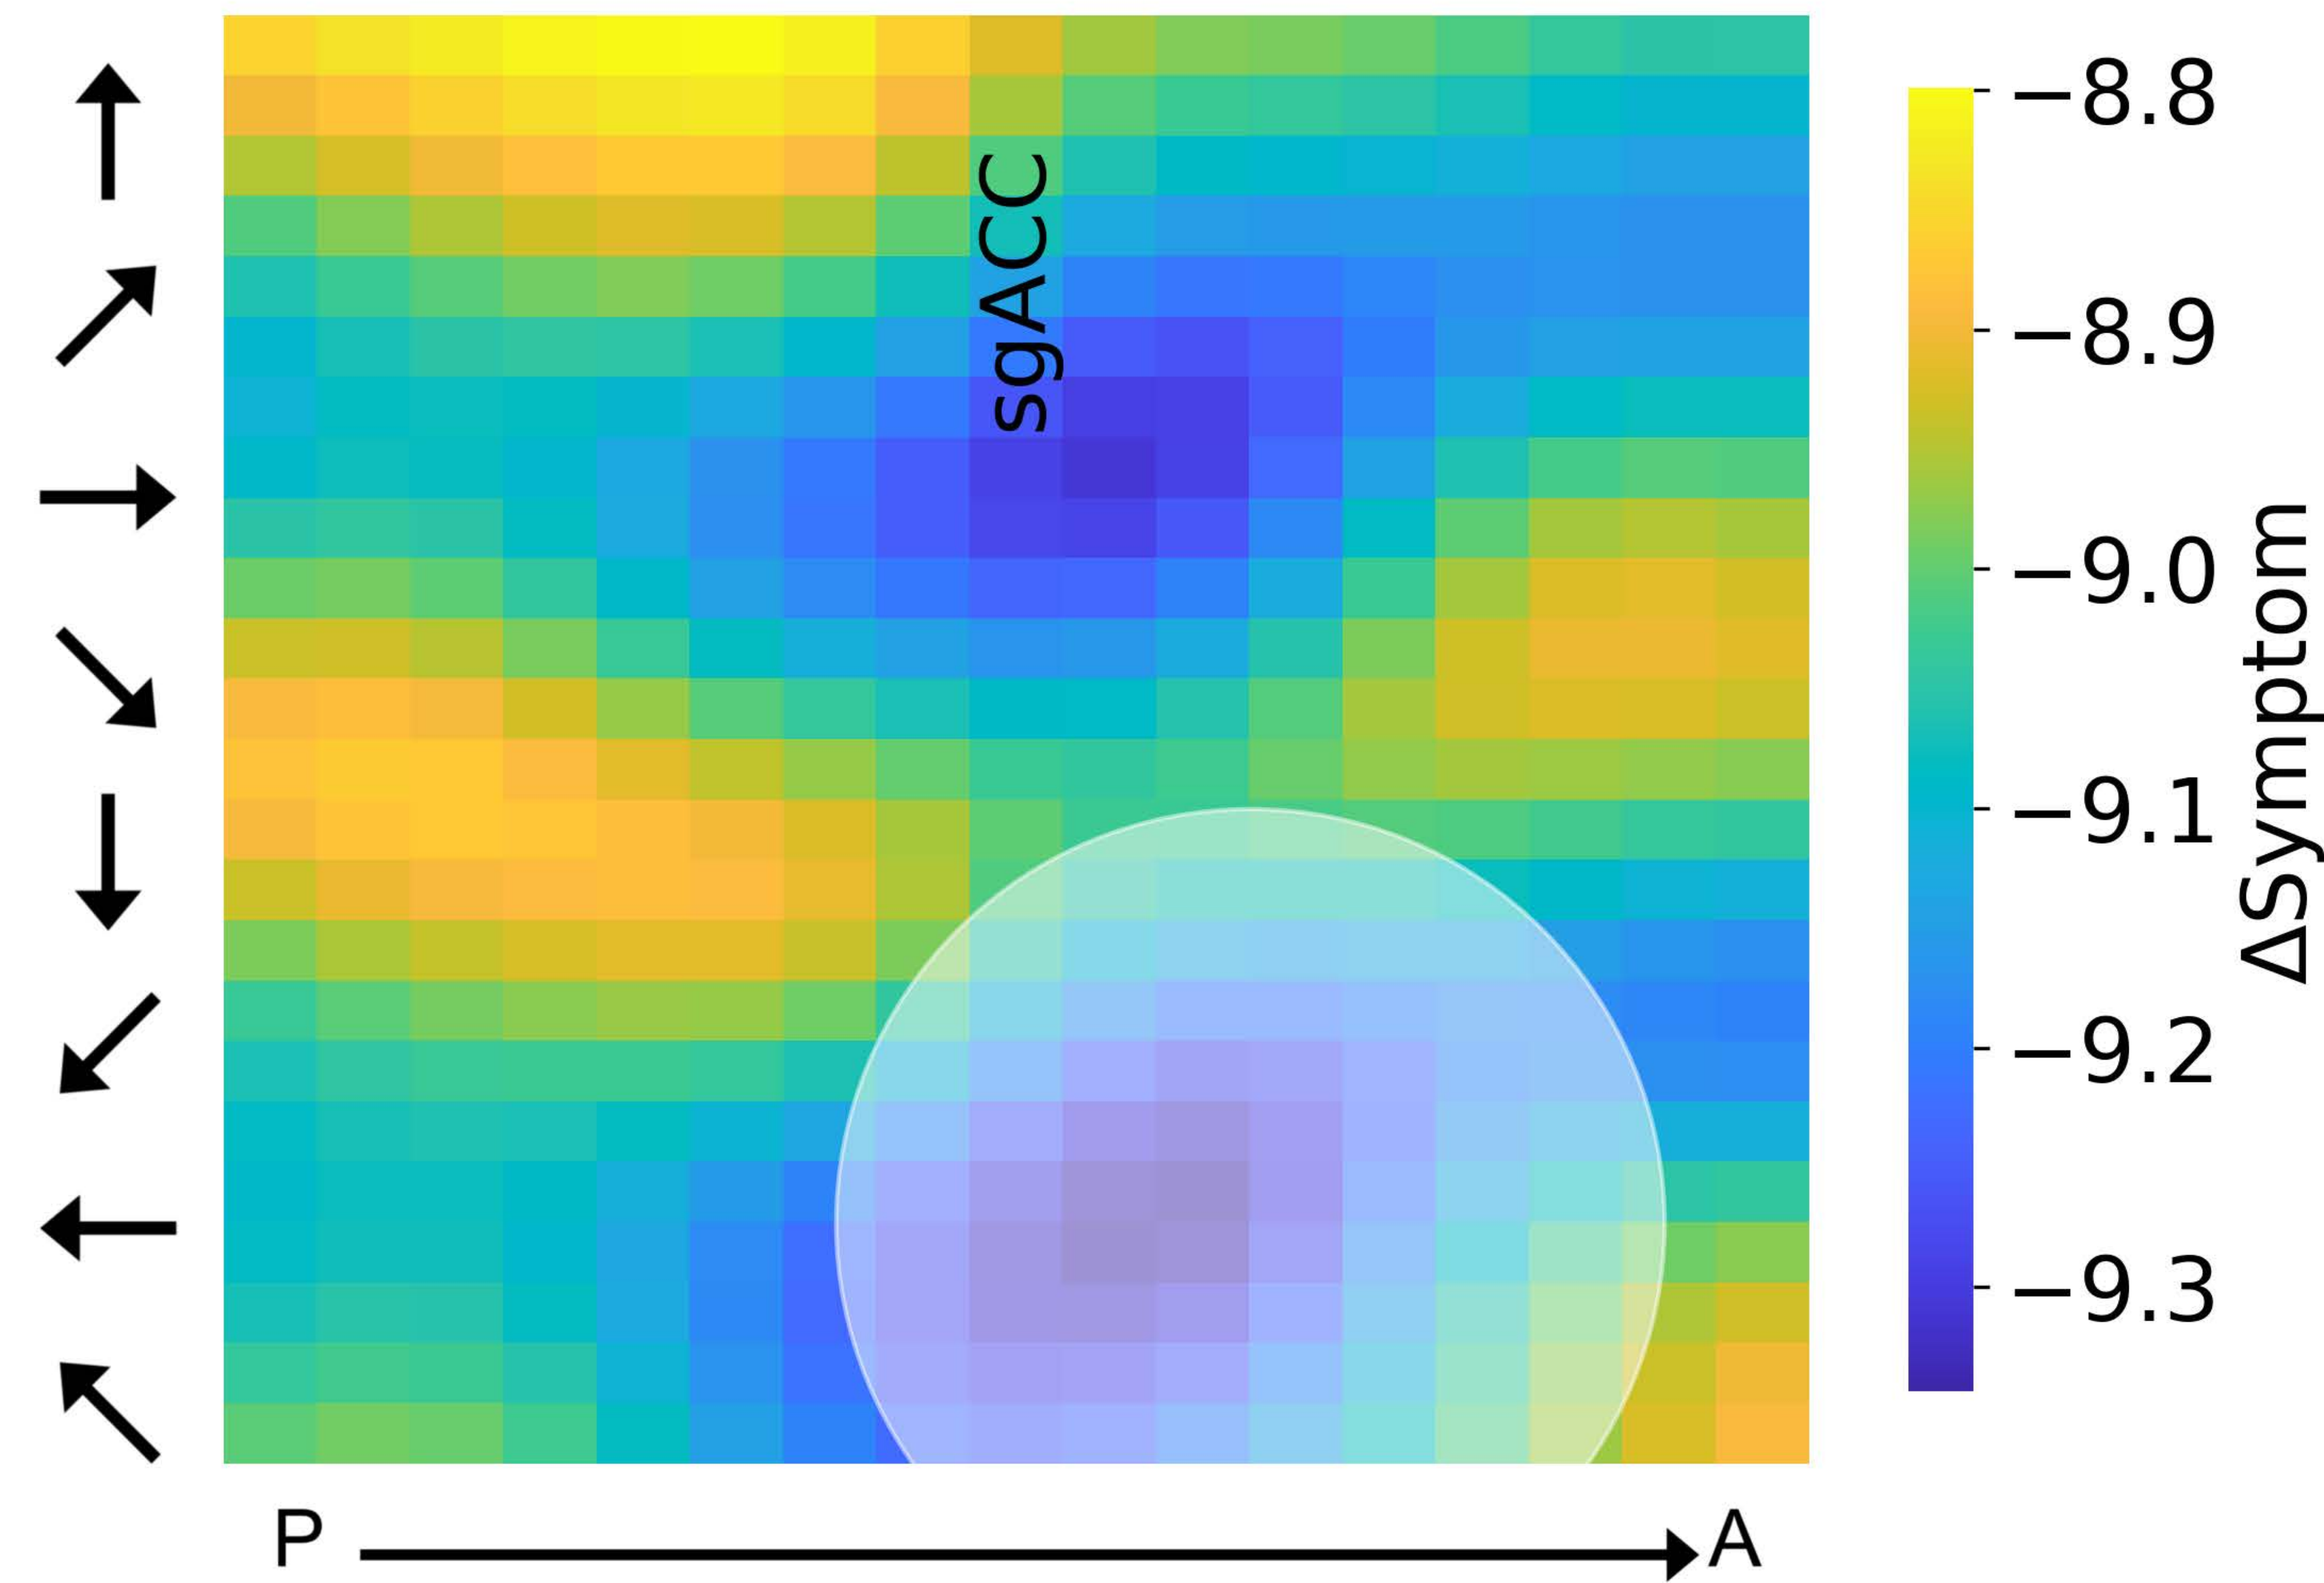



# INDARWK081NTV\_madrs\_right\_dlpfc

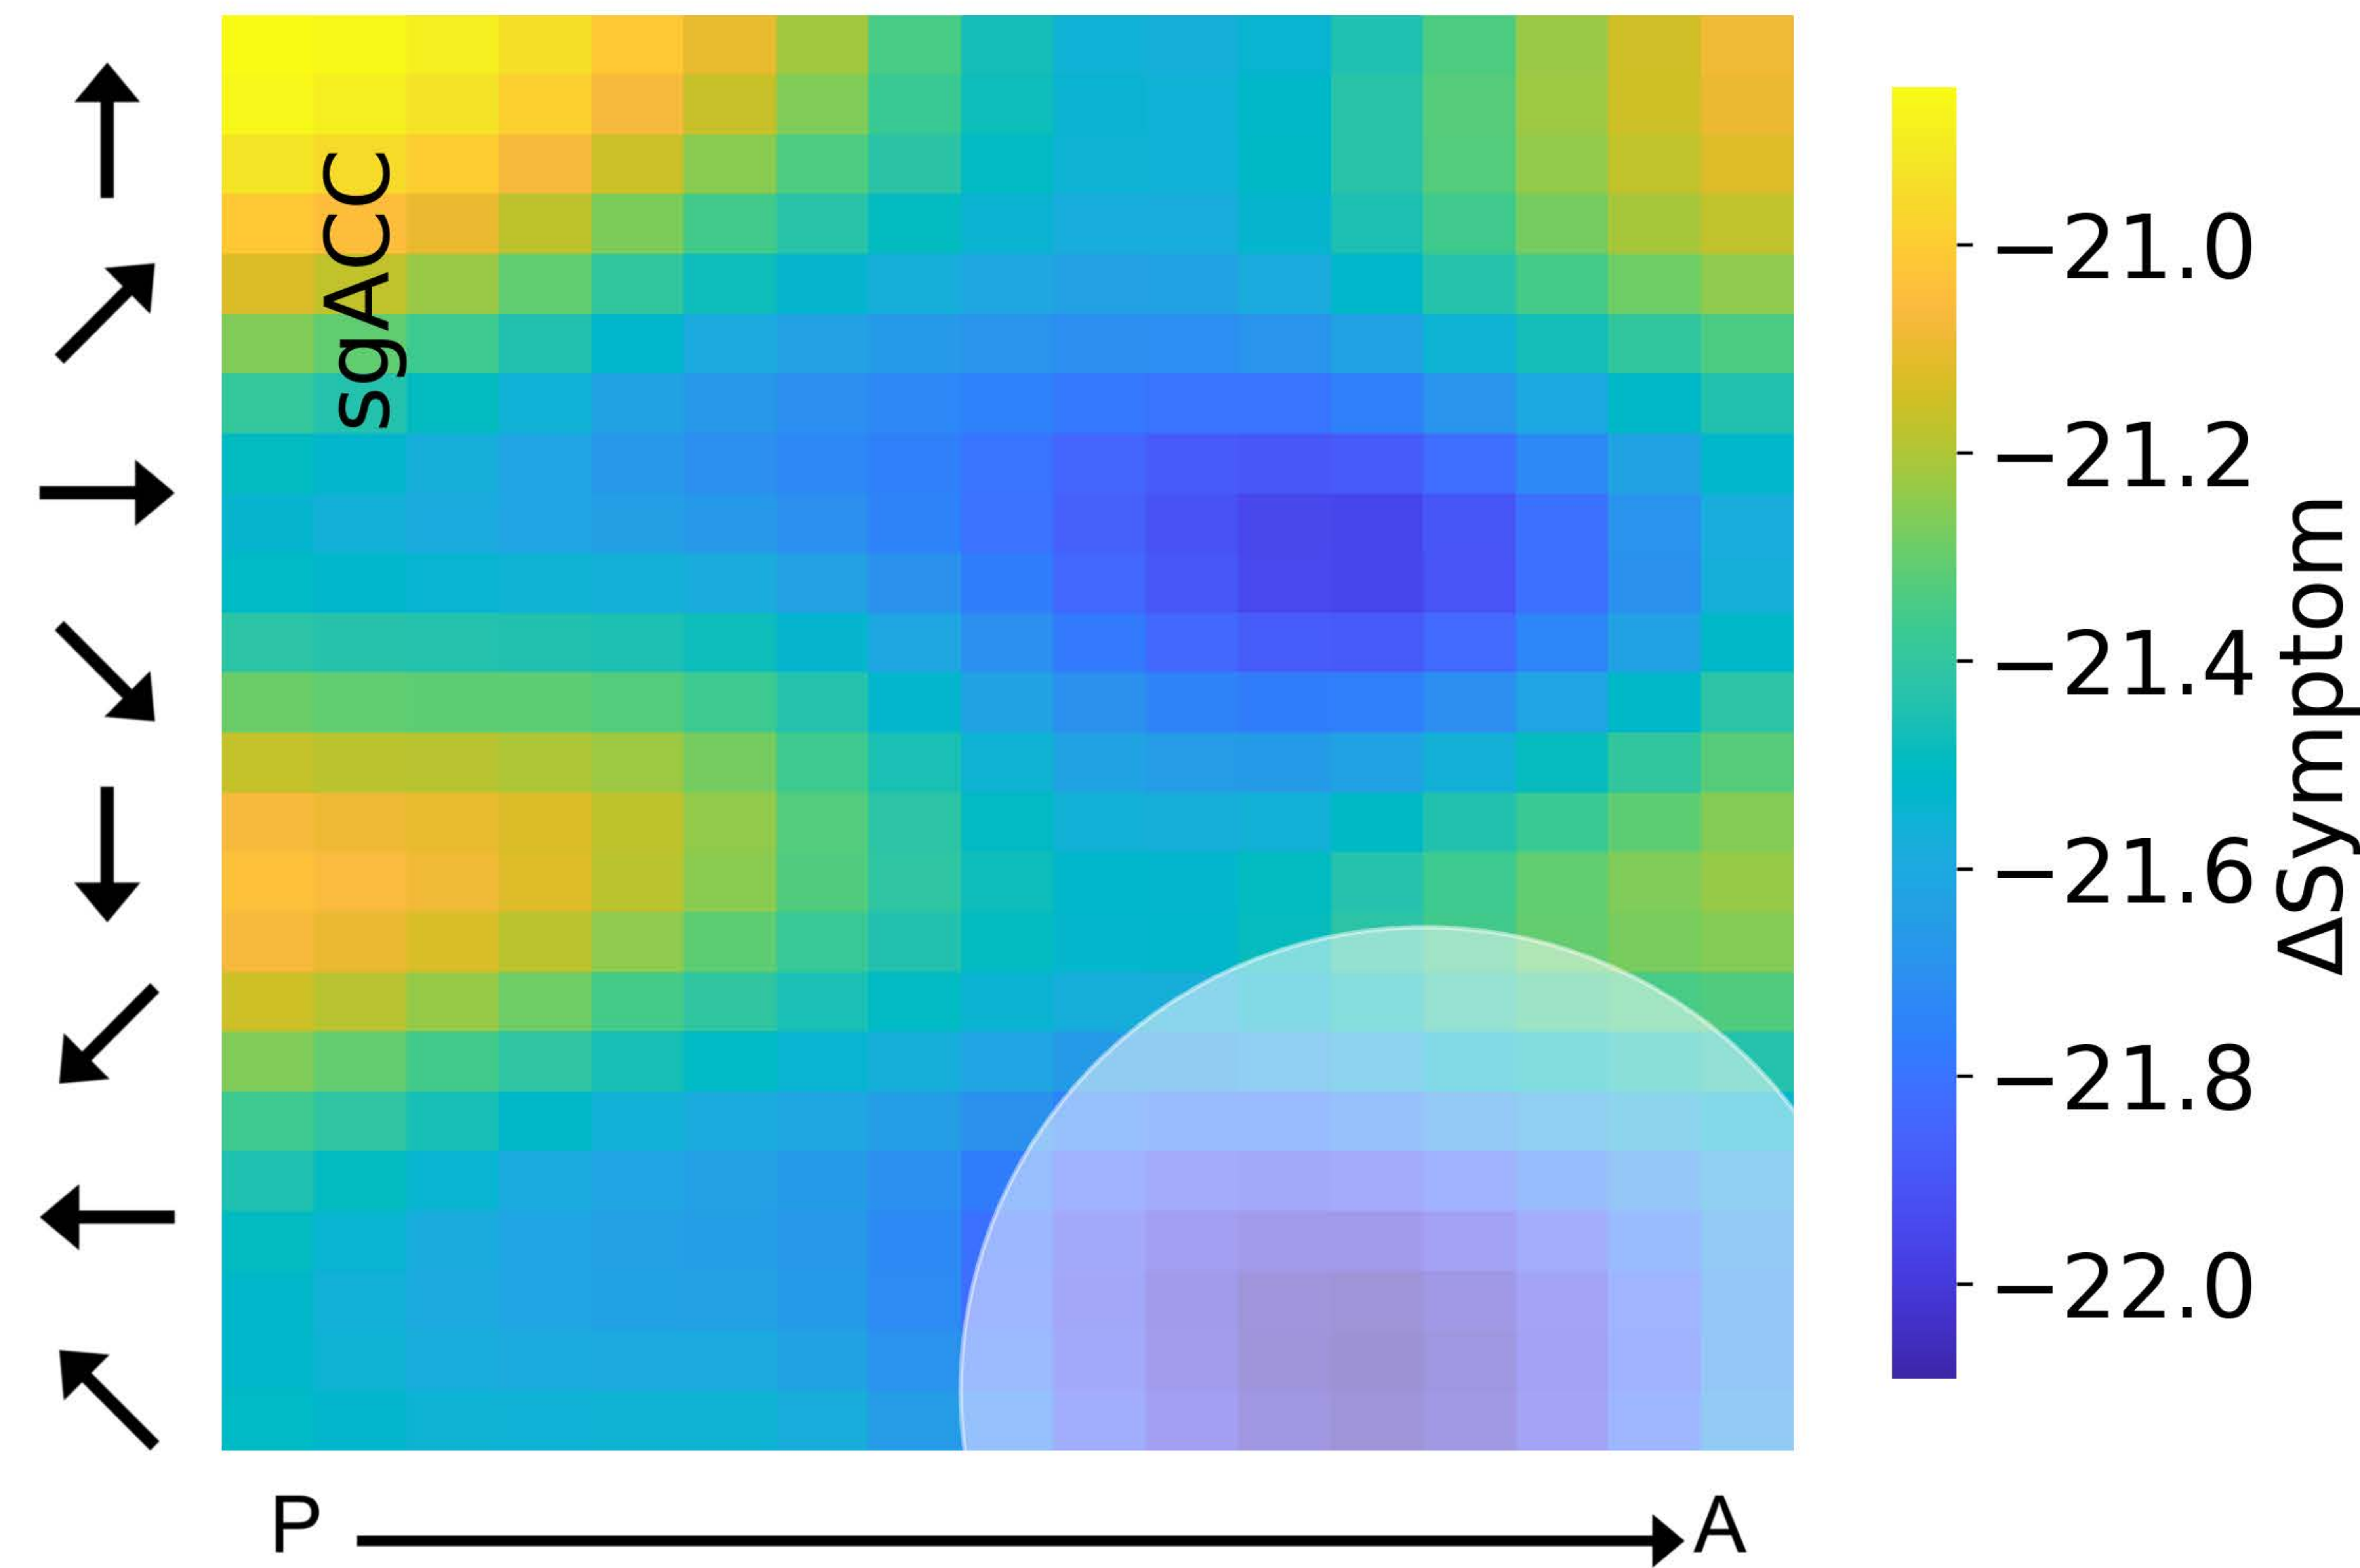



# INDARWL277NXF\_madrs\_right\_dlpfc

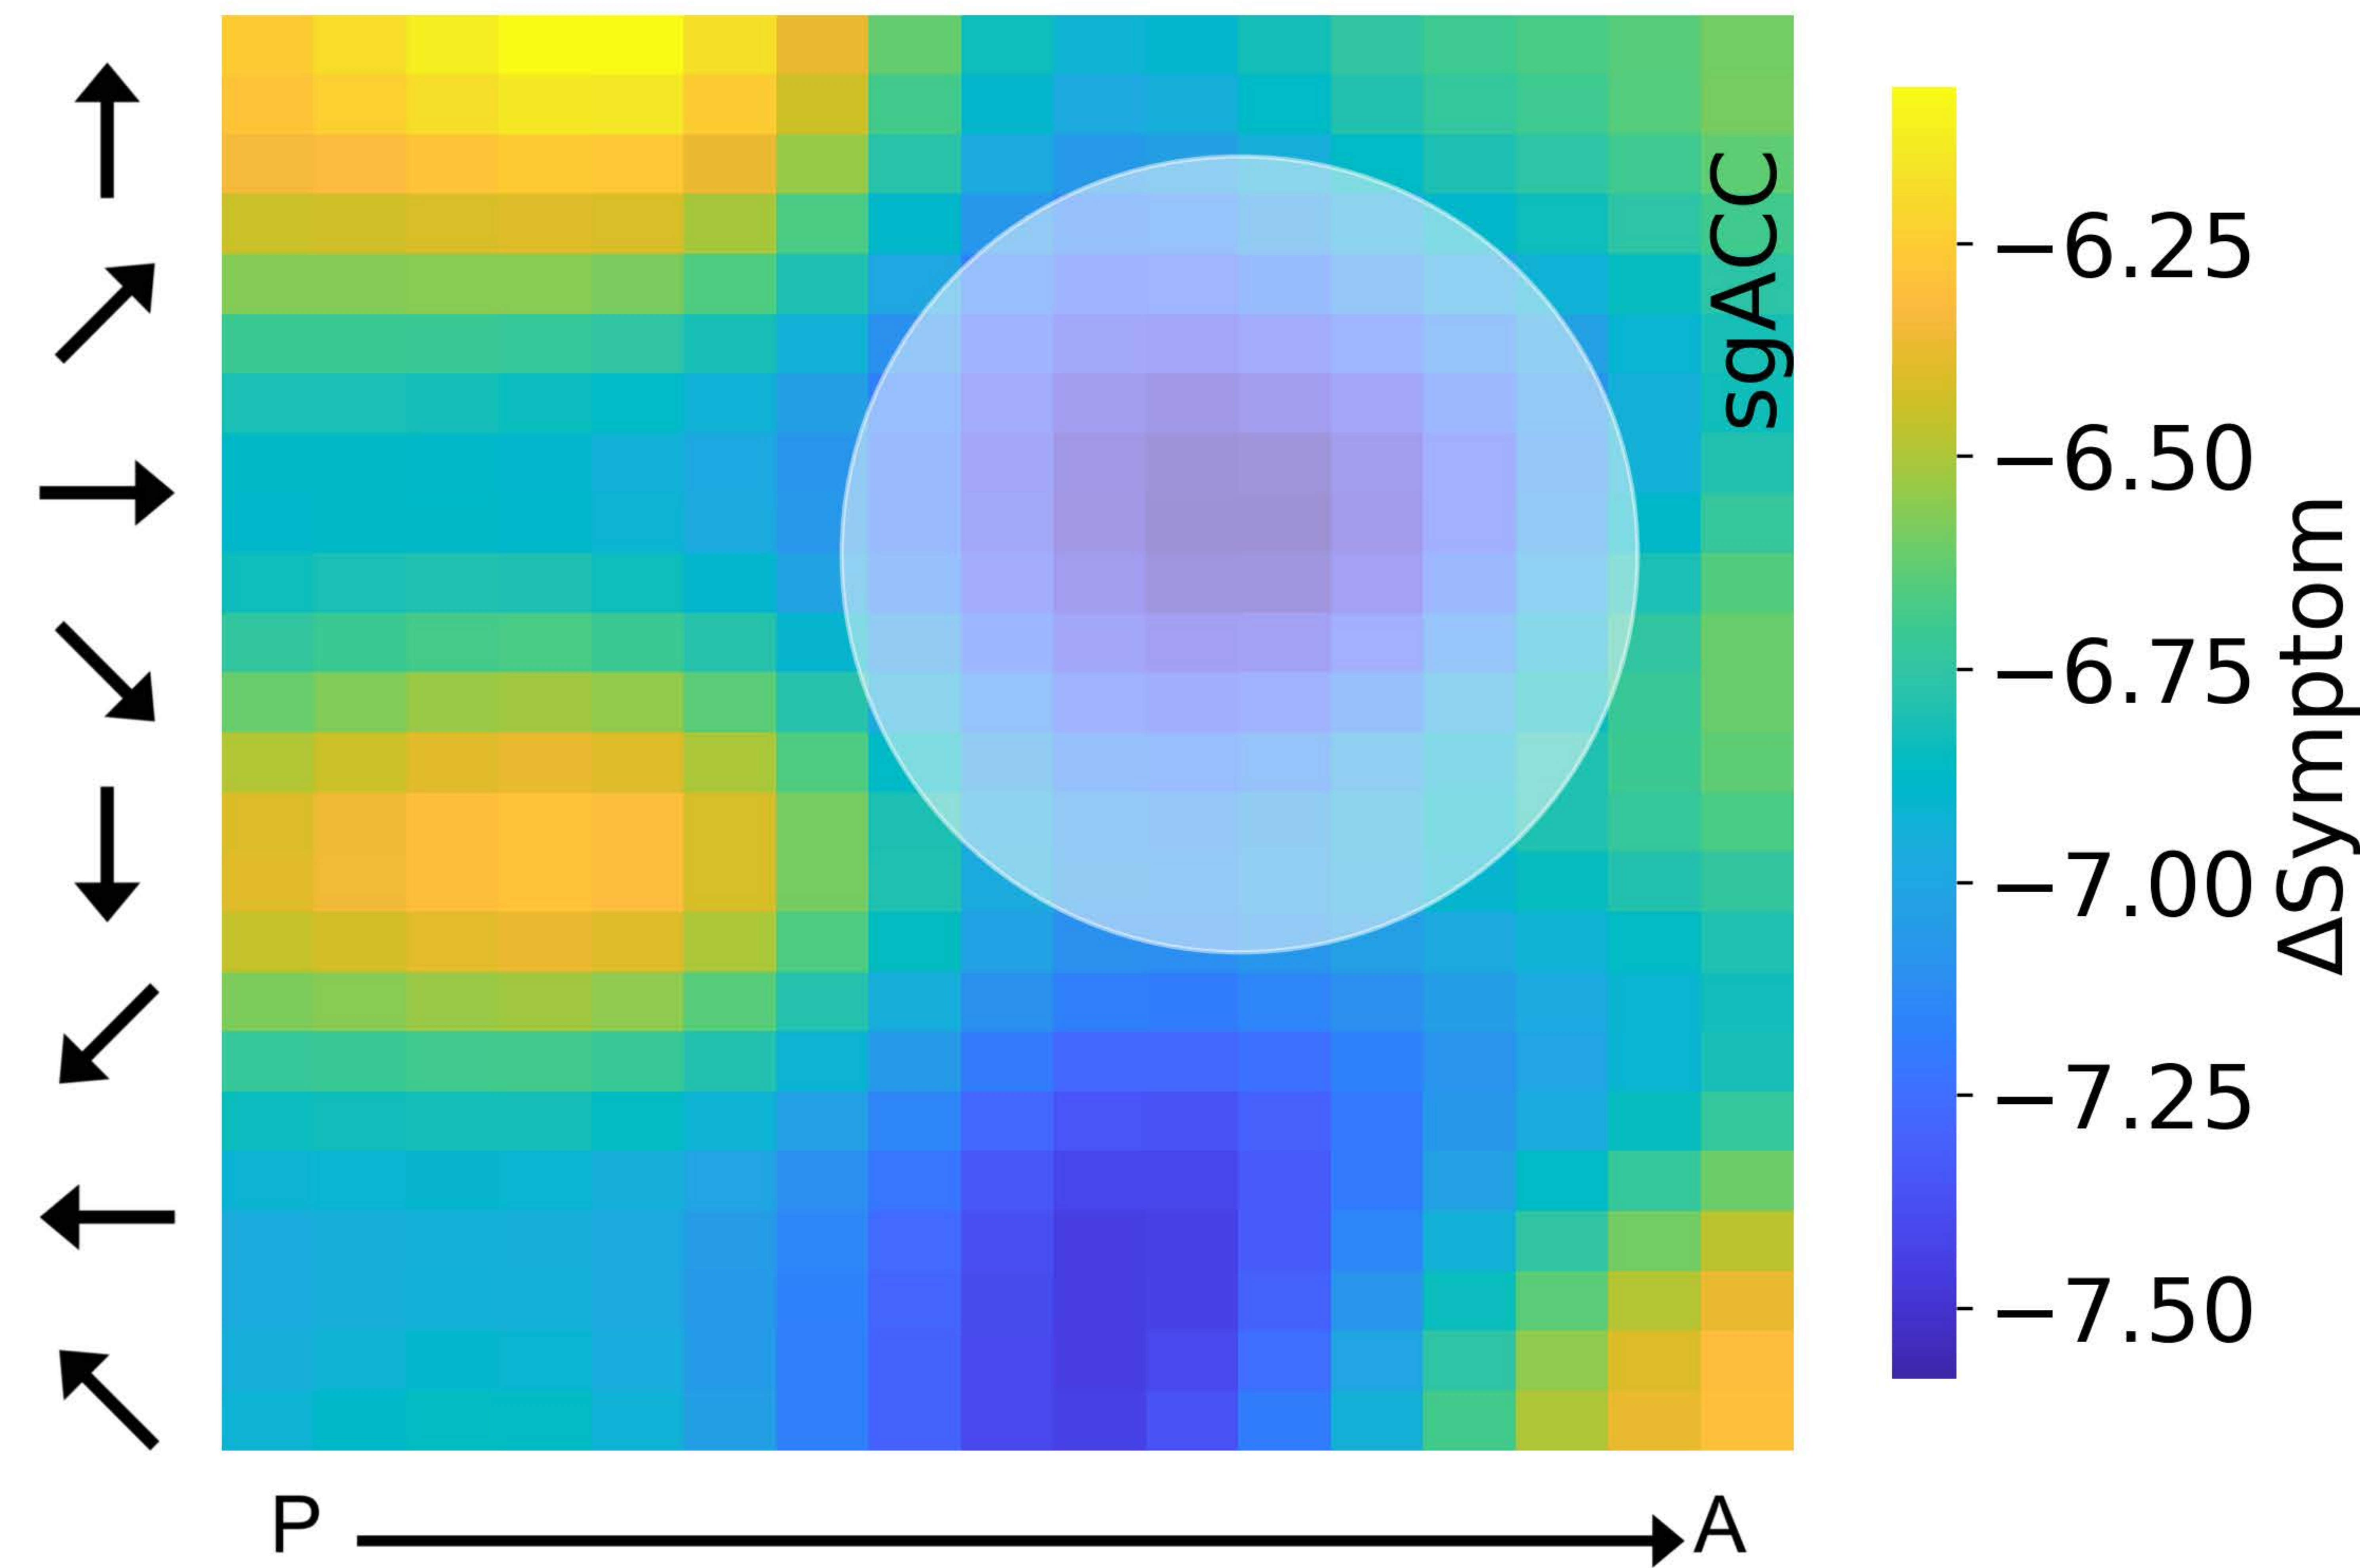



# NDARWV016ZAT\_madrs\_right\_dlpfc

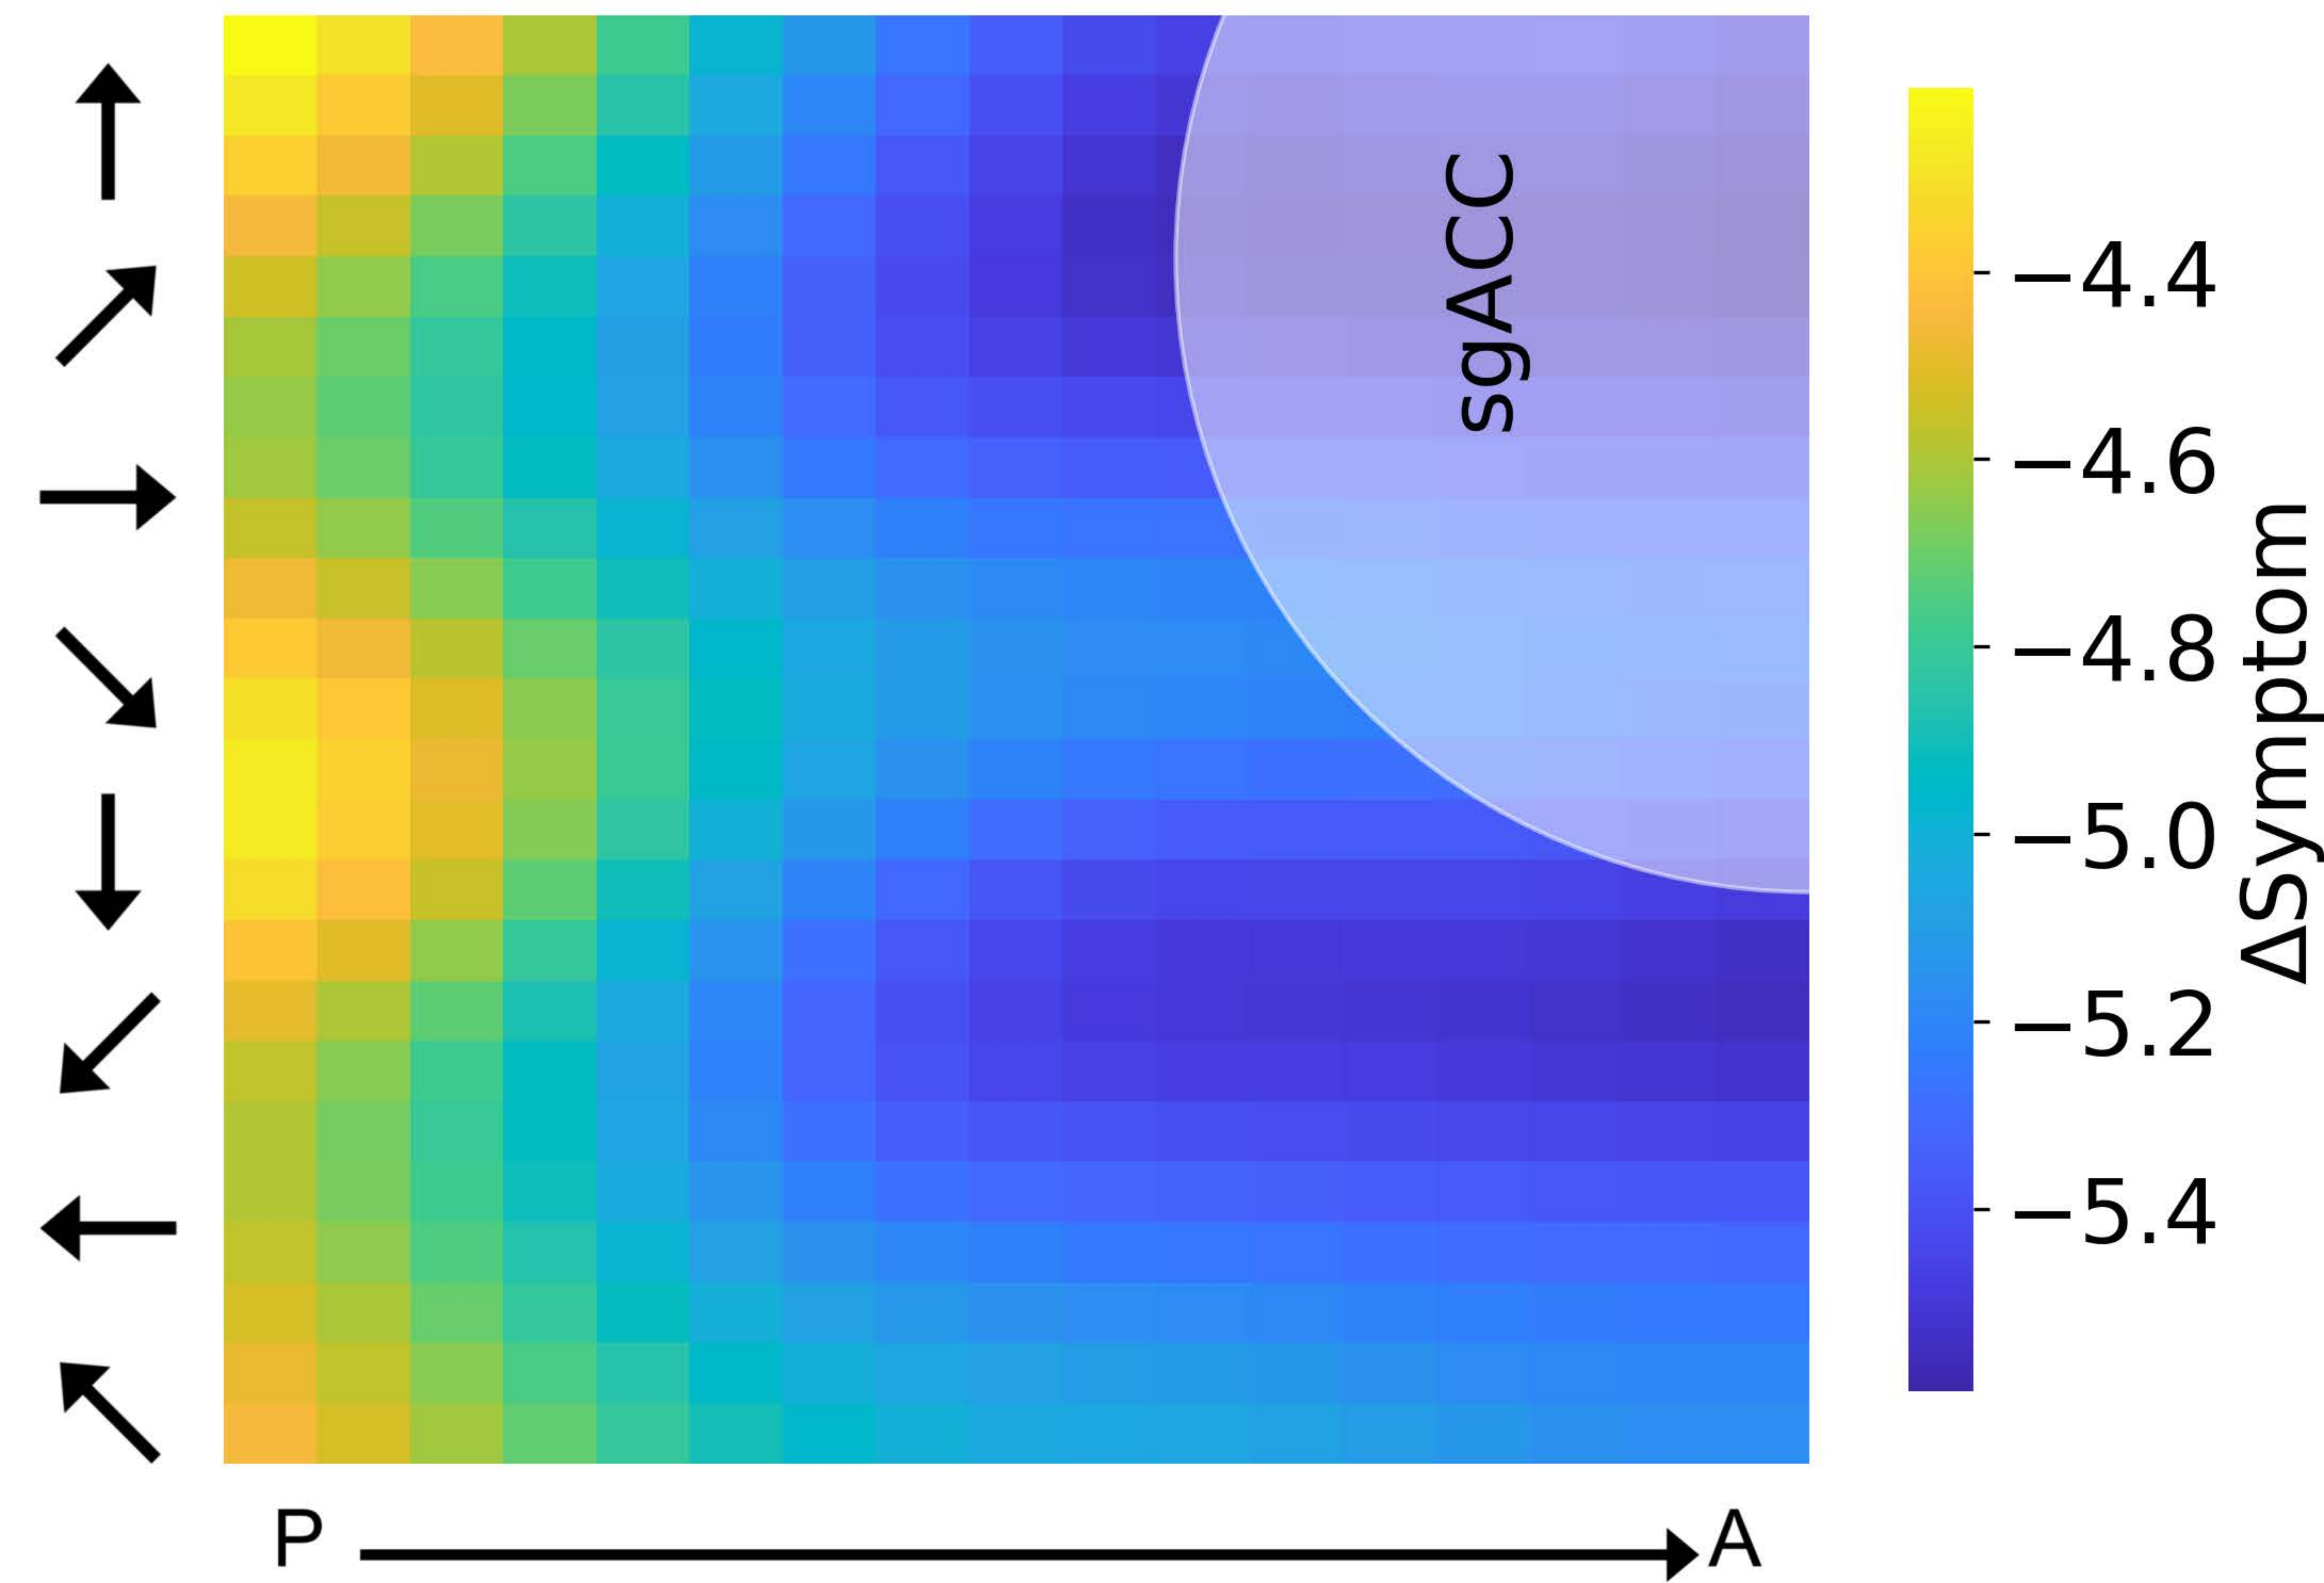



# NDARXA148KPL\_madrs\_right\_dlpfc

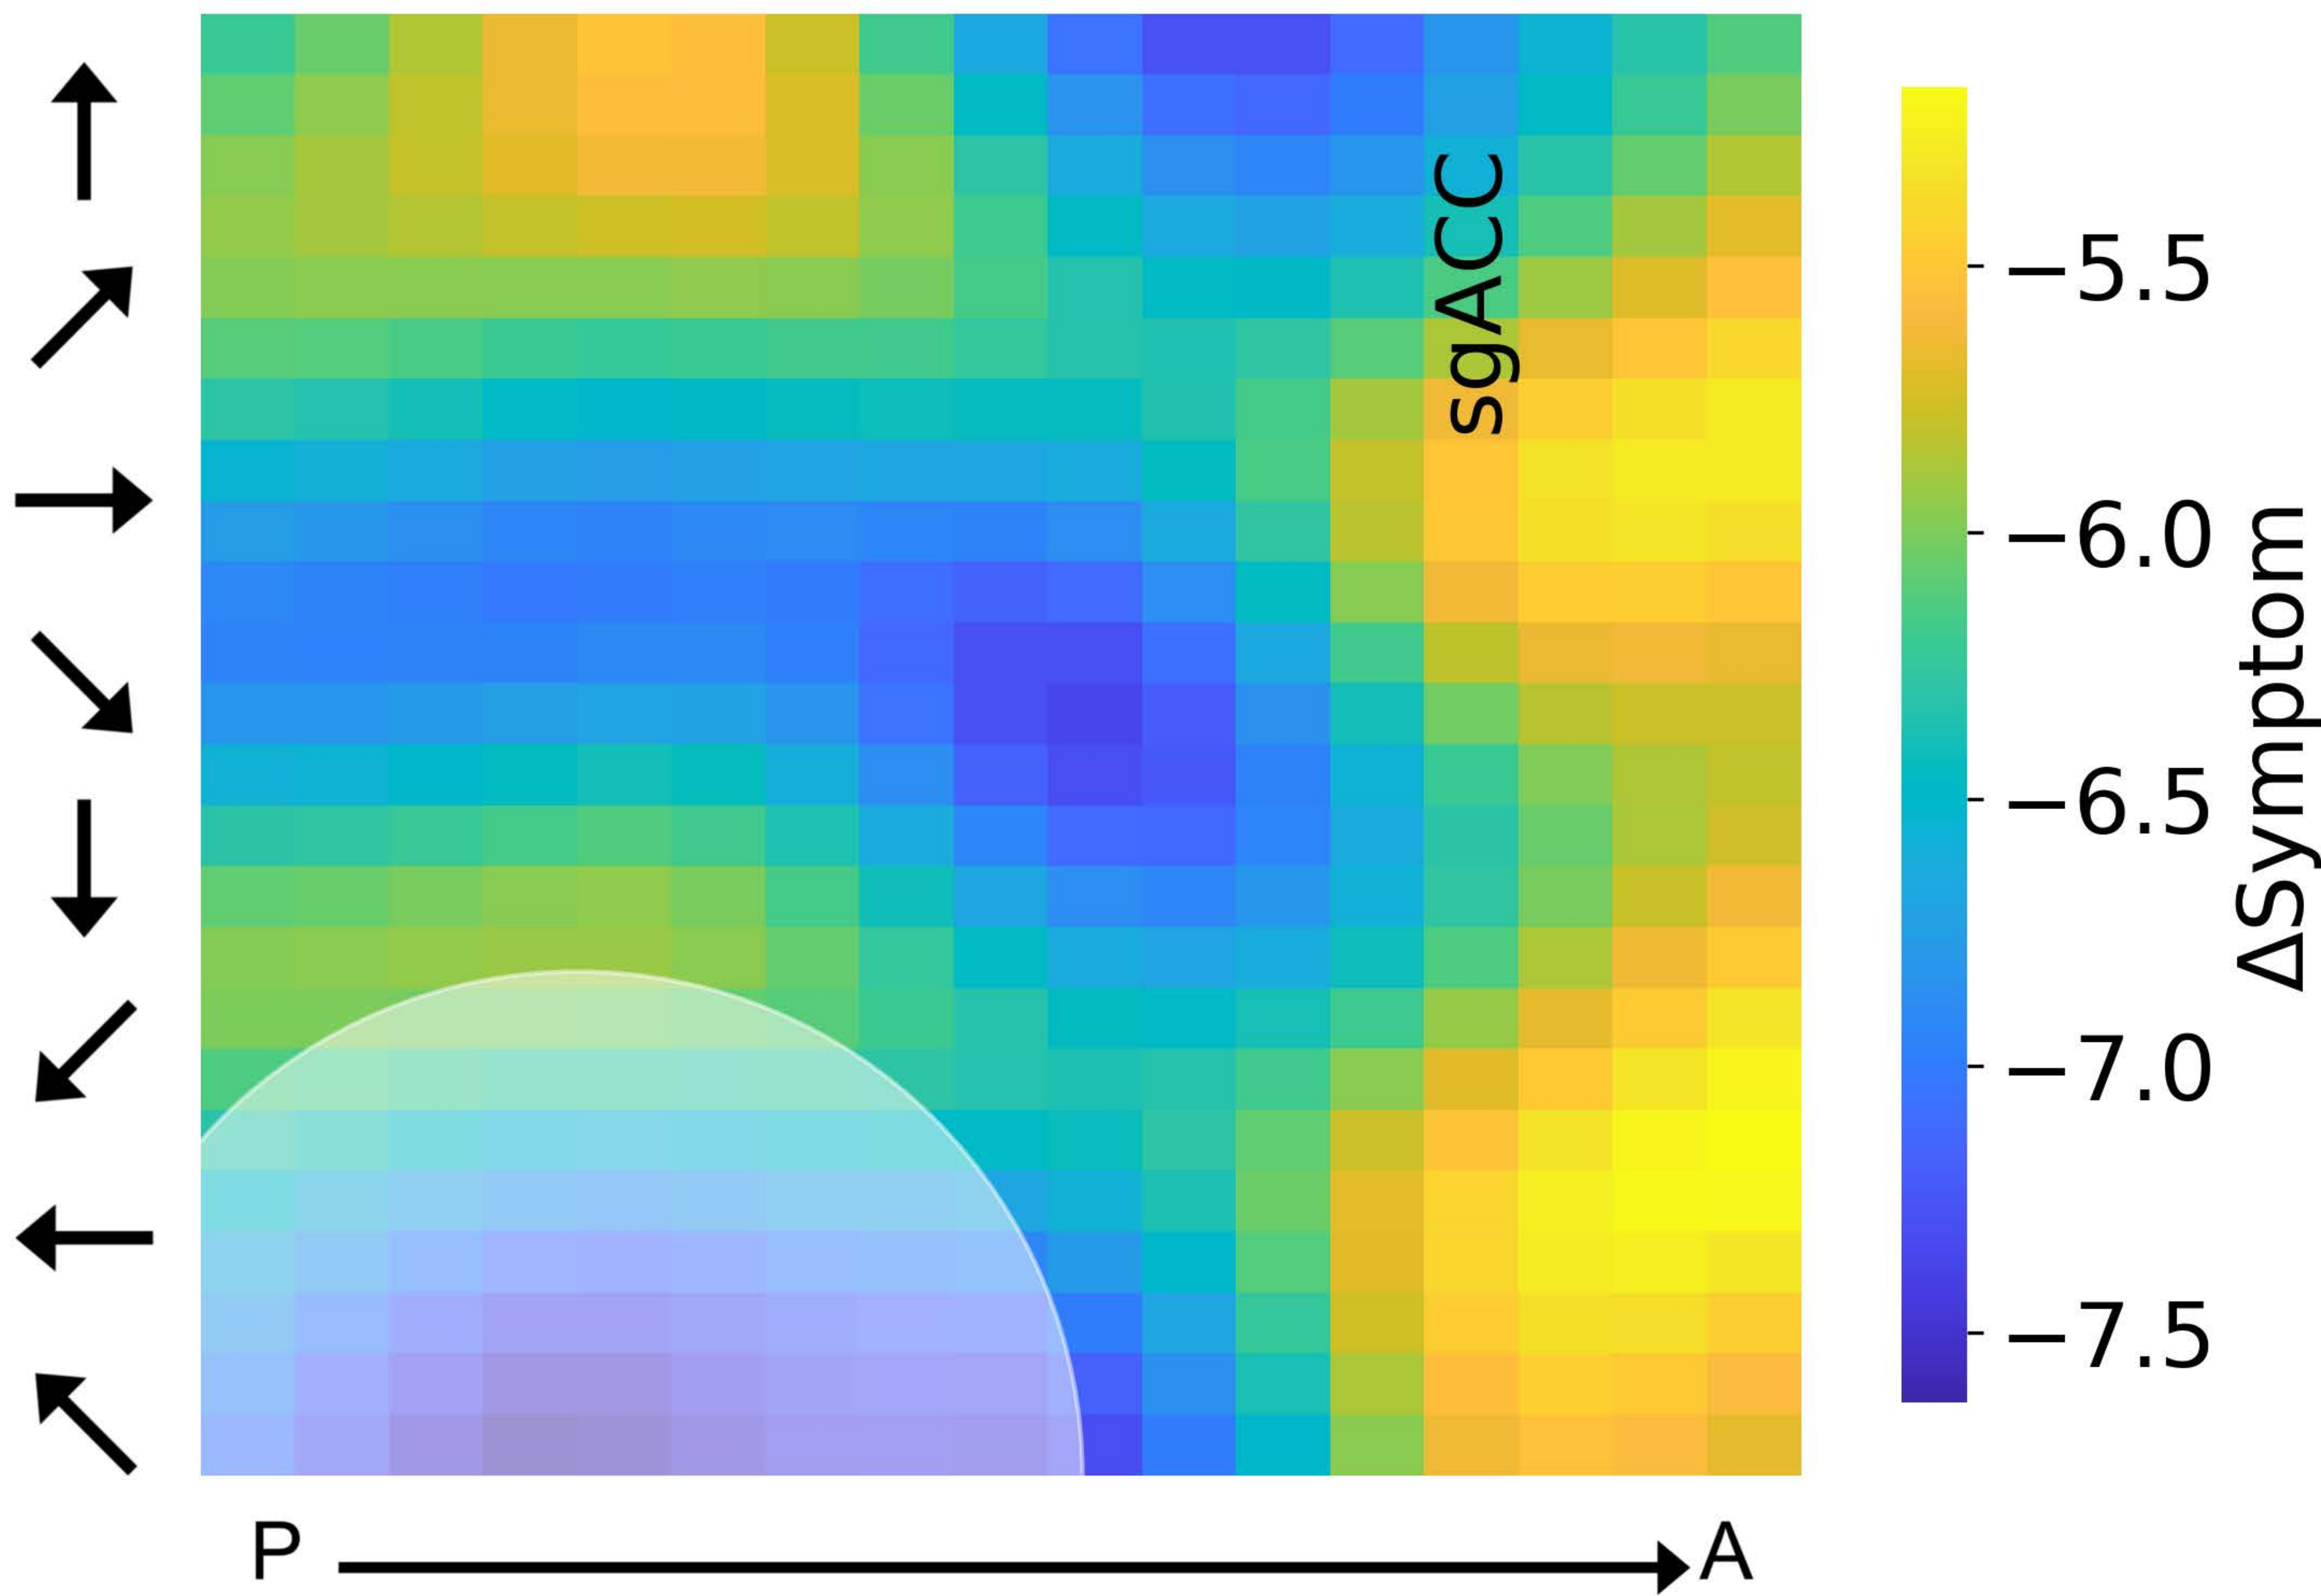



# NDARXD921NRV\_madrs\_right\_dlpfc

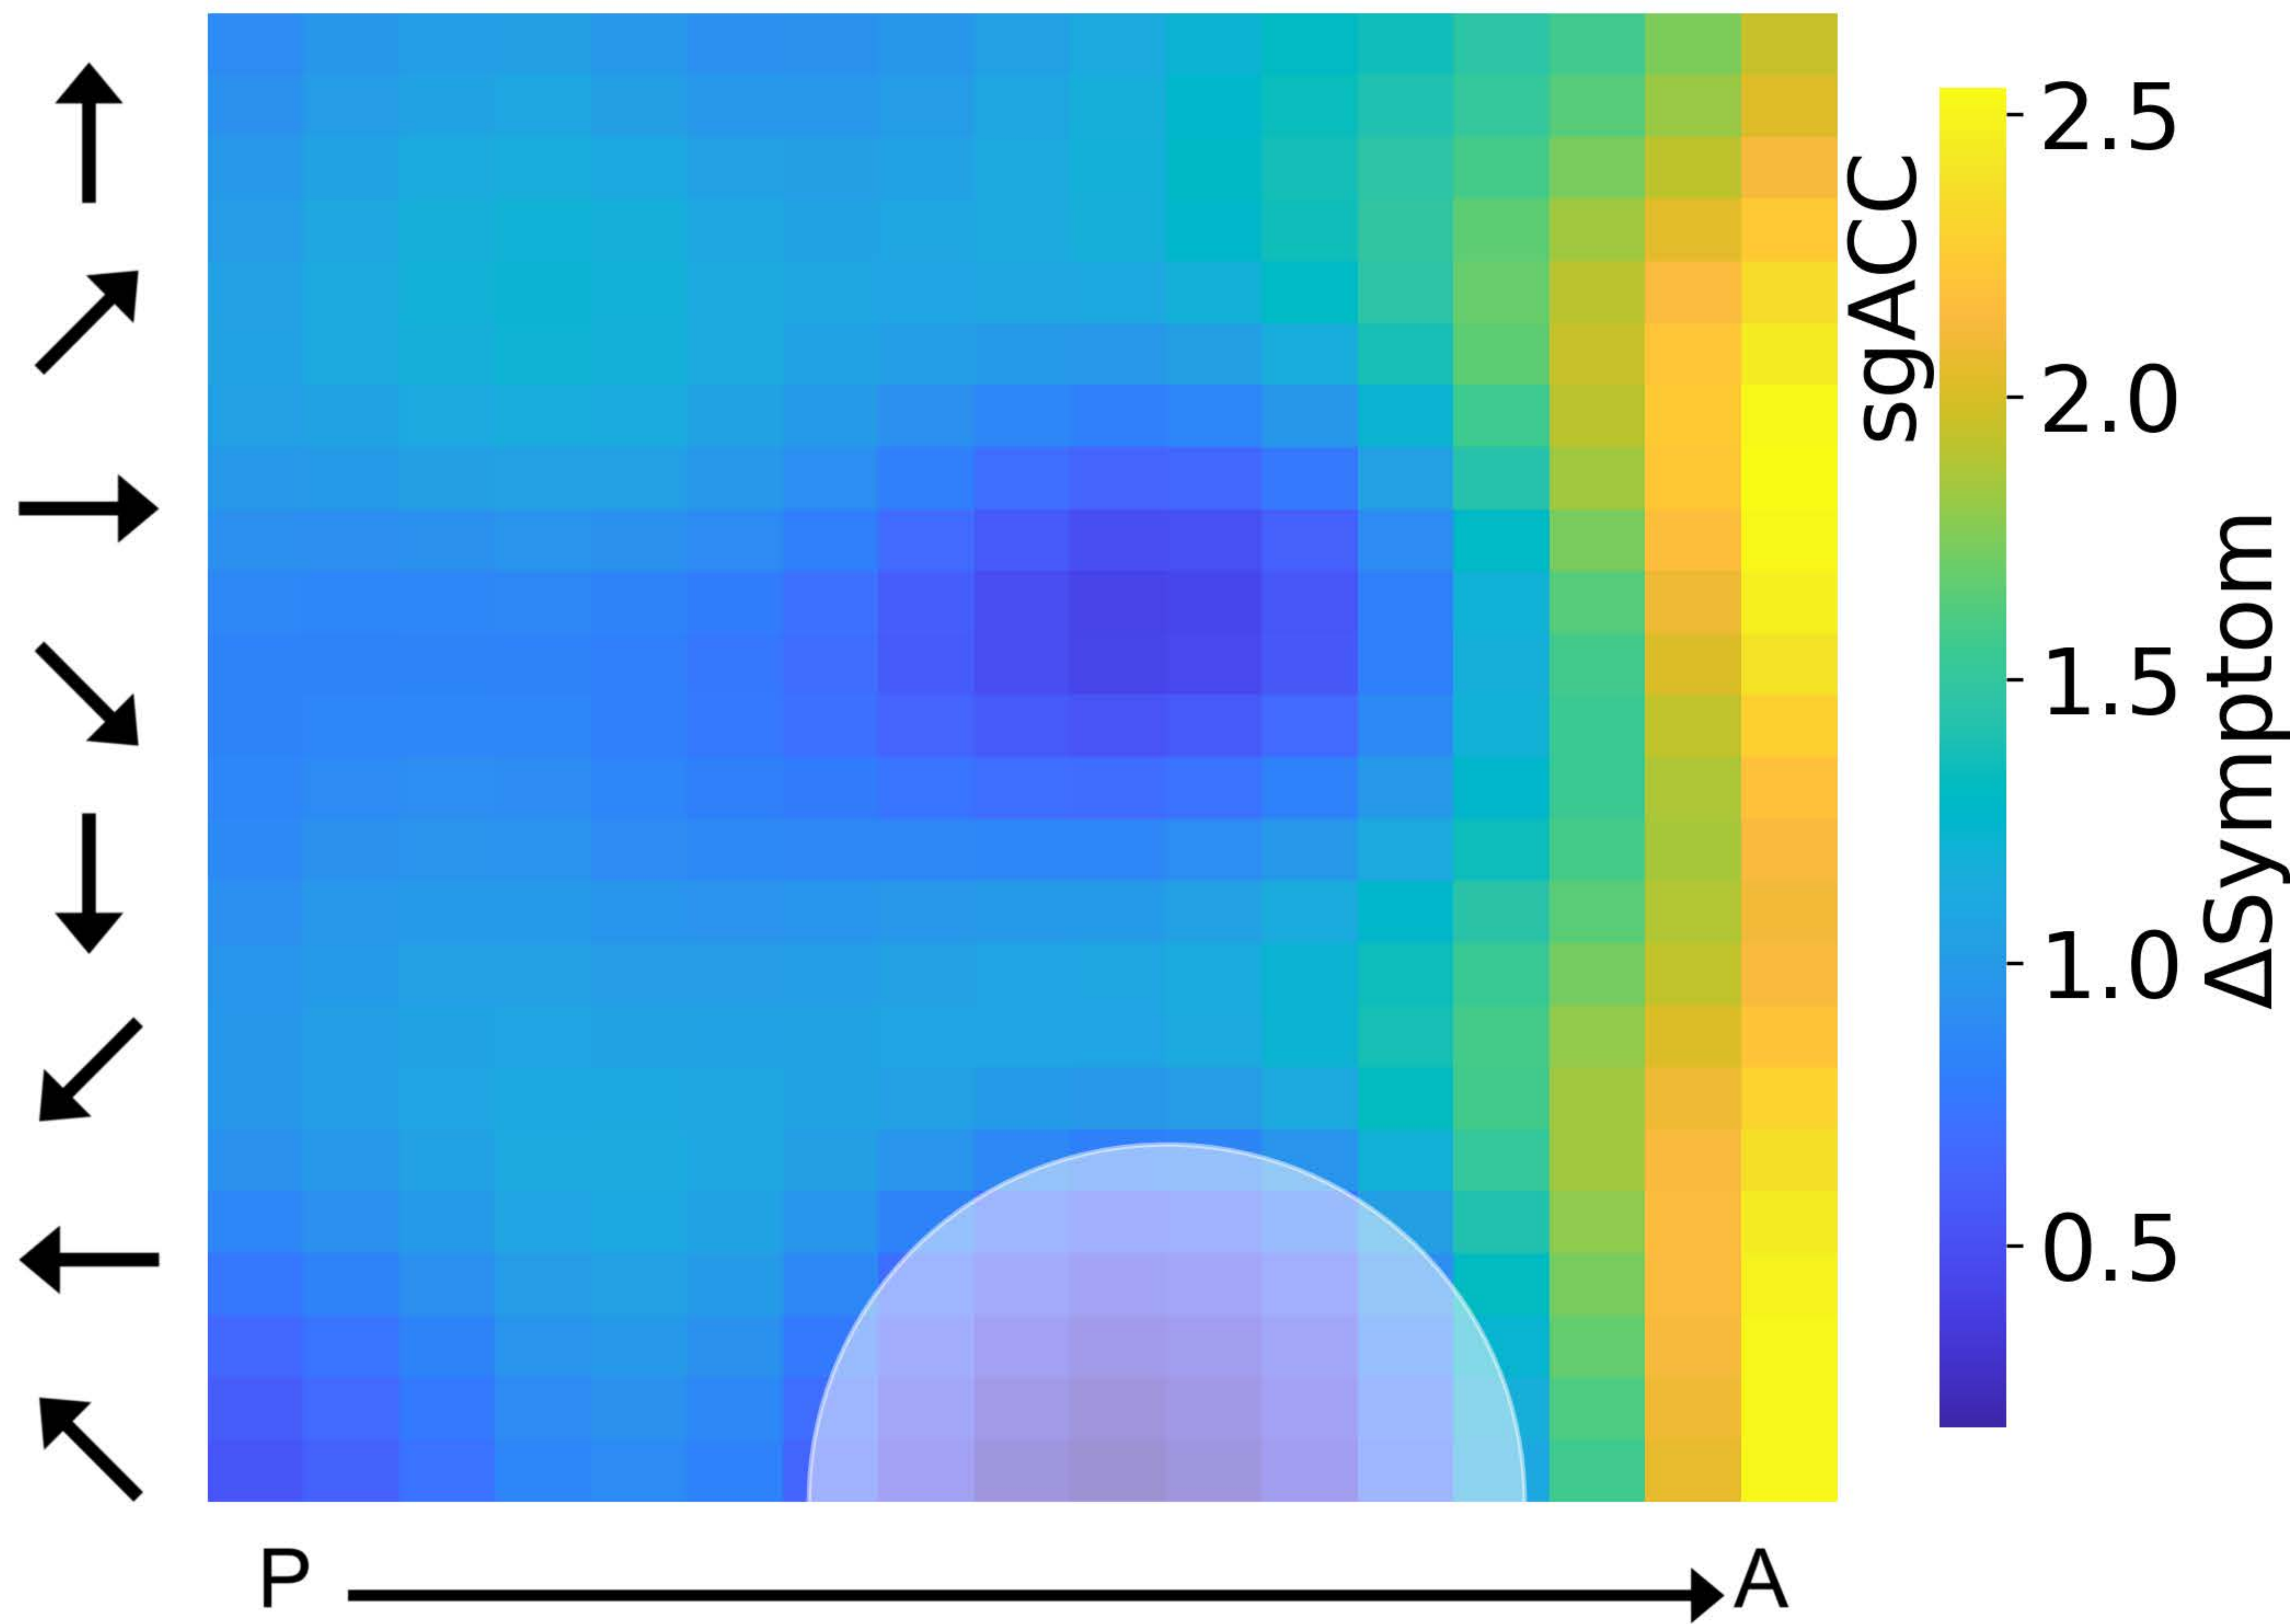



# NDARXU500EFT\_madrs\_right\_dlpfc

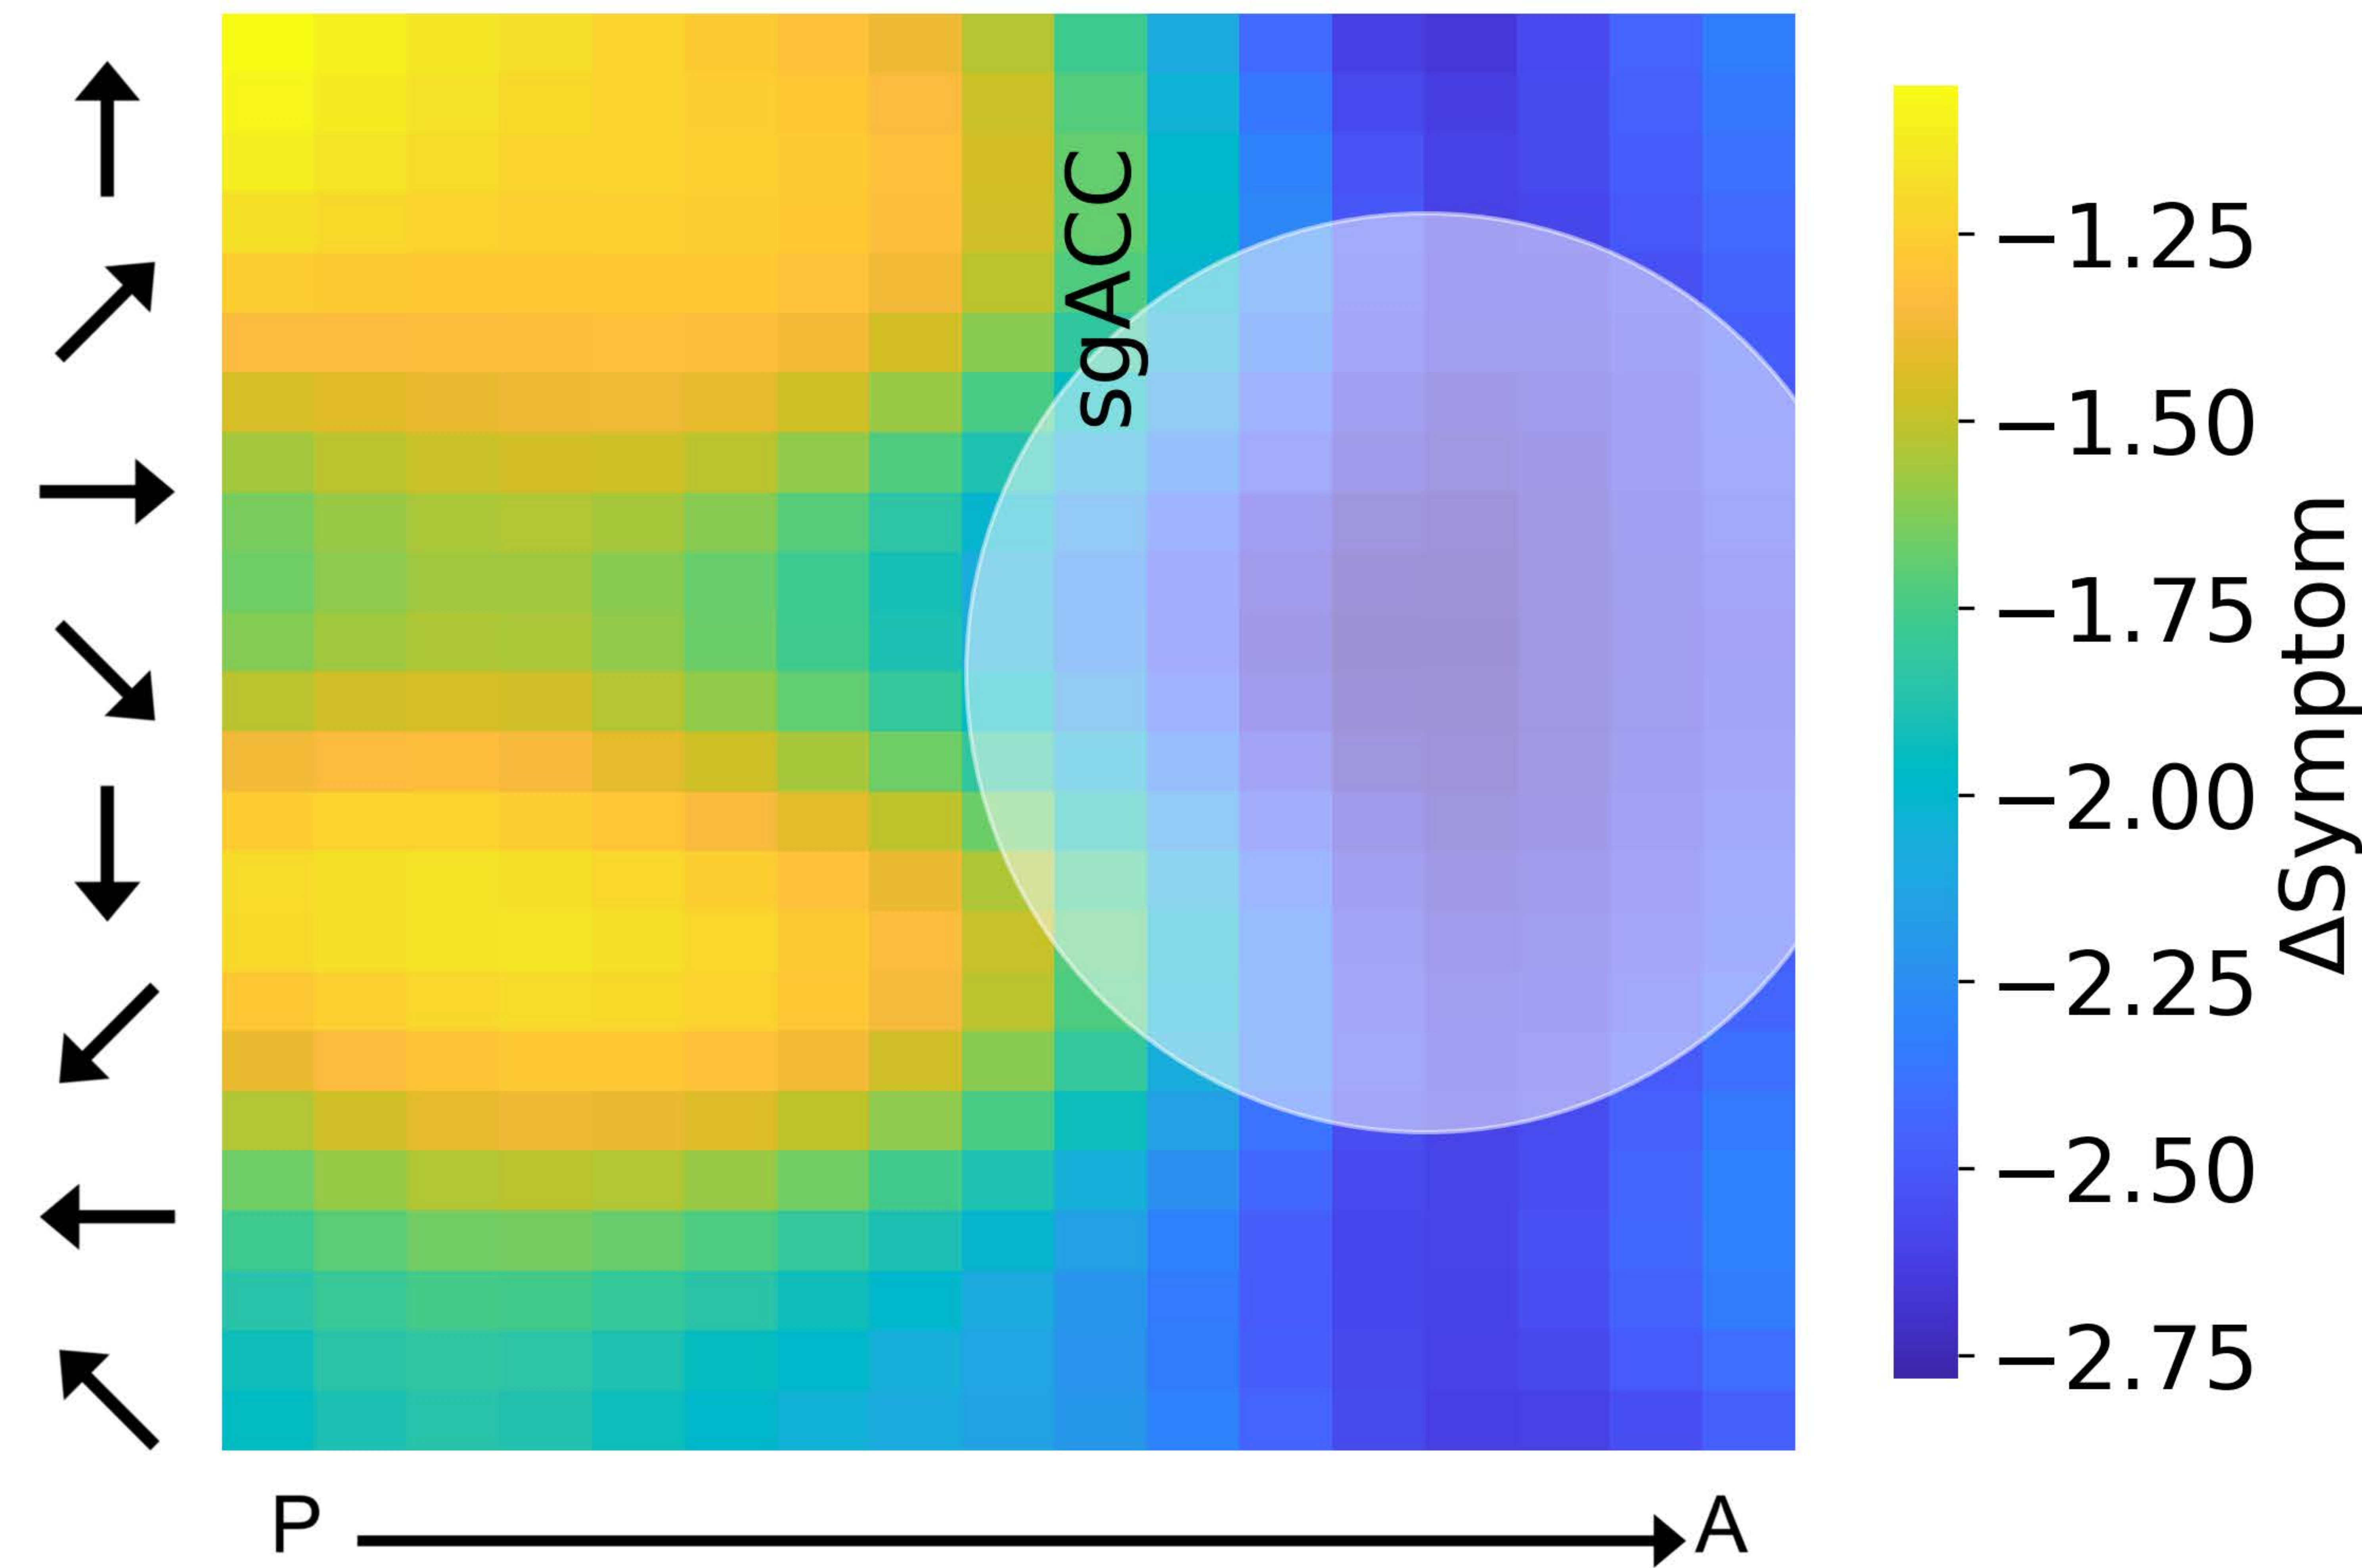



# NDARYB181GTB\_madrs\_right\_dlpfc

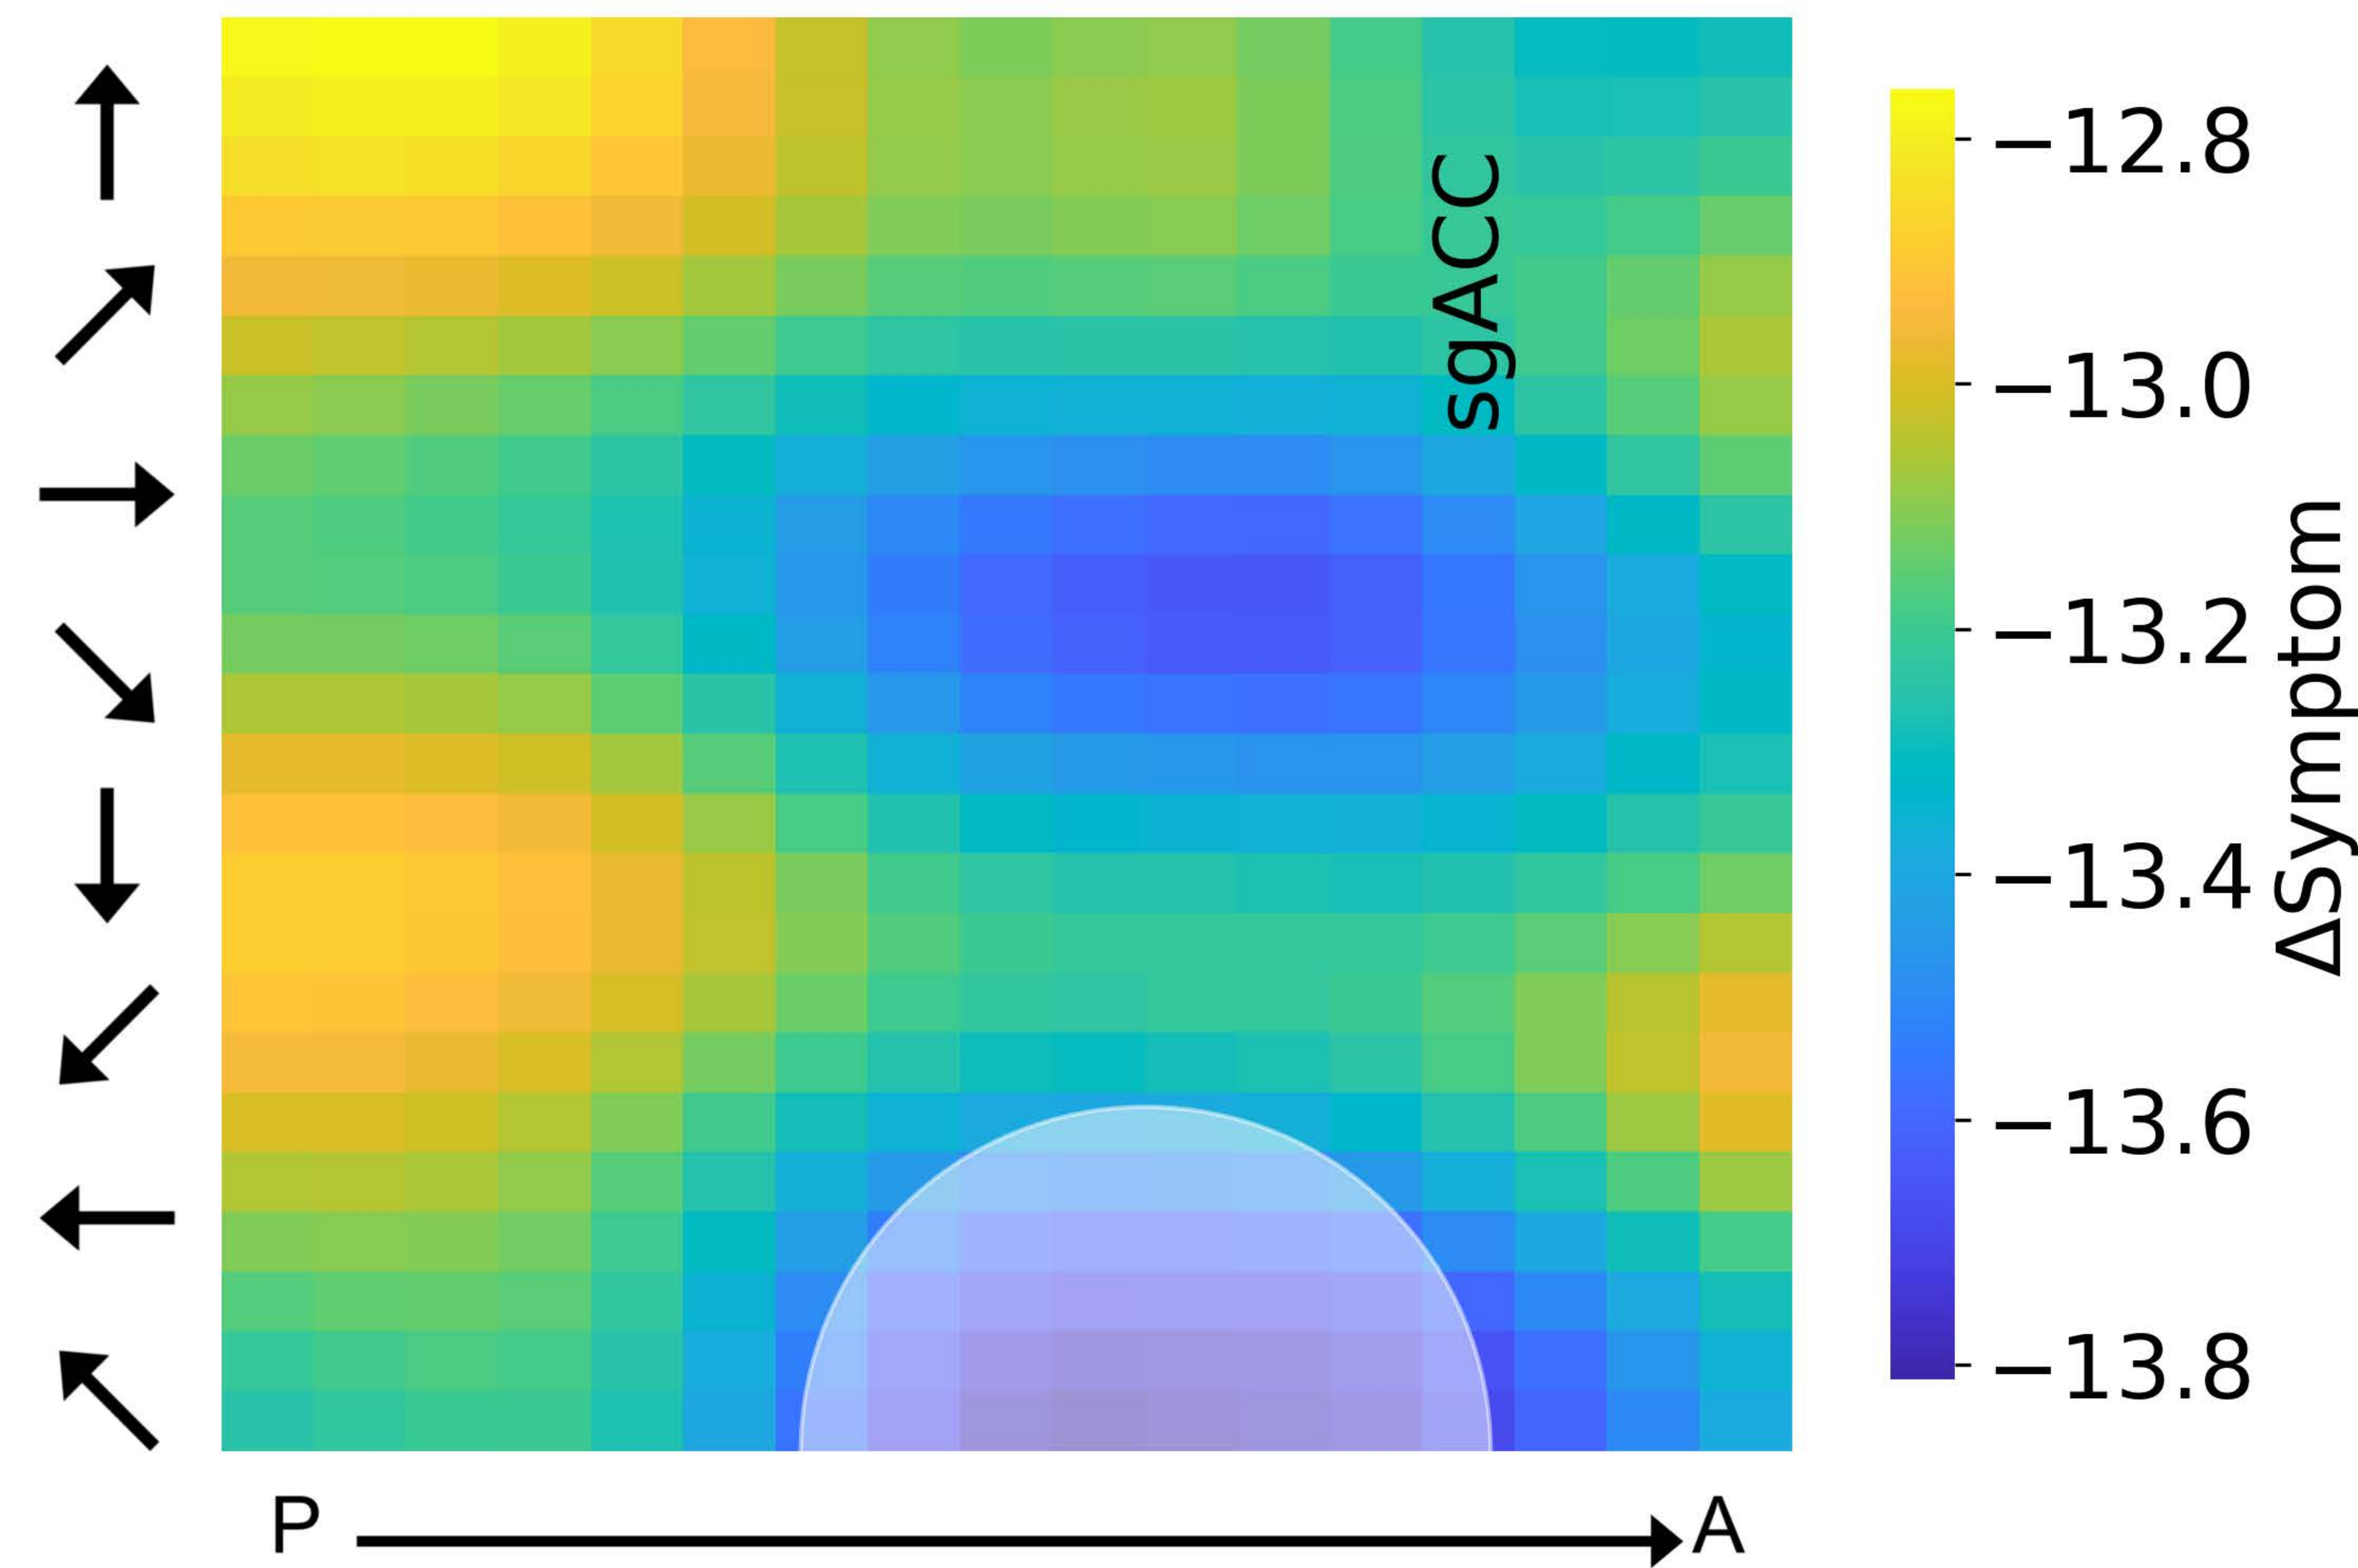



# NDARYD169AYQ\_madrs\_right\_dlpfc

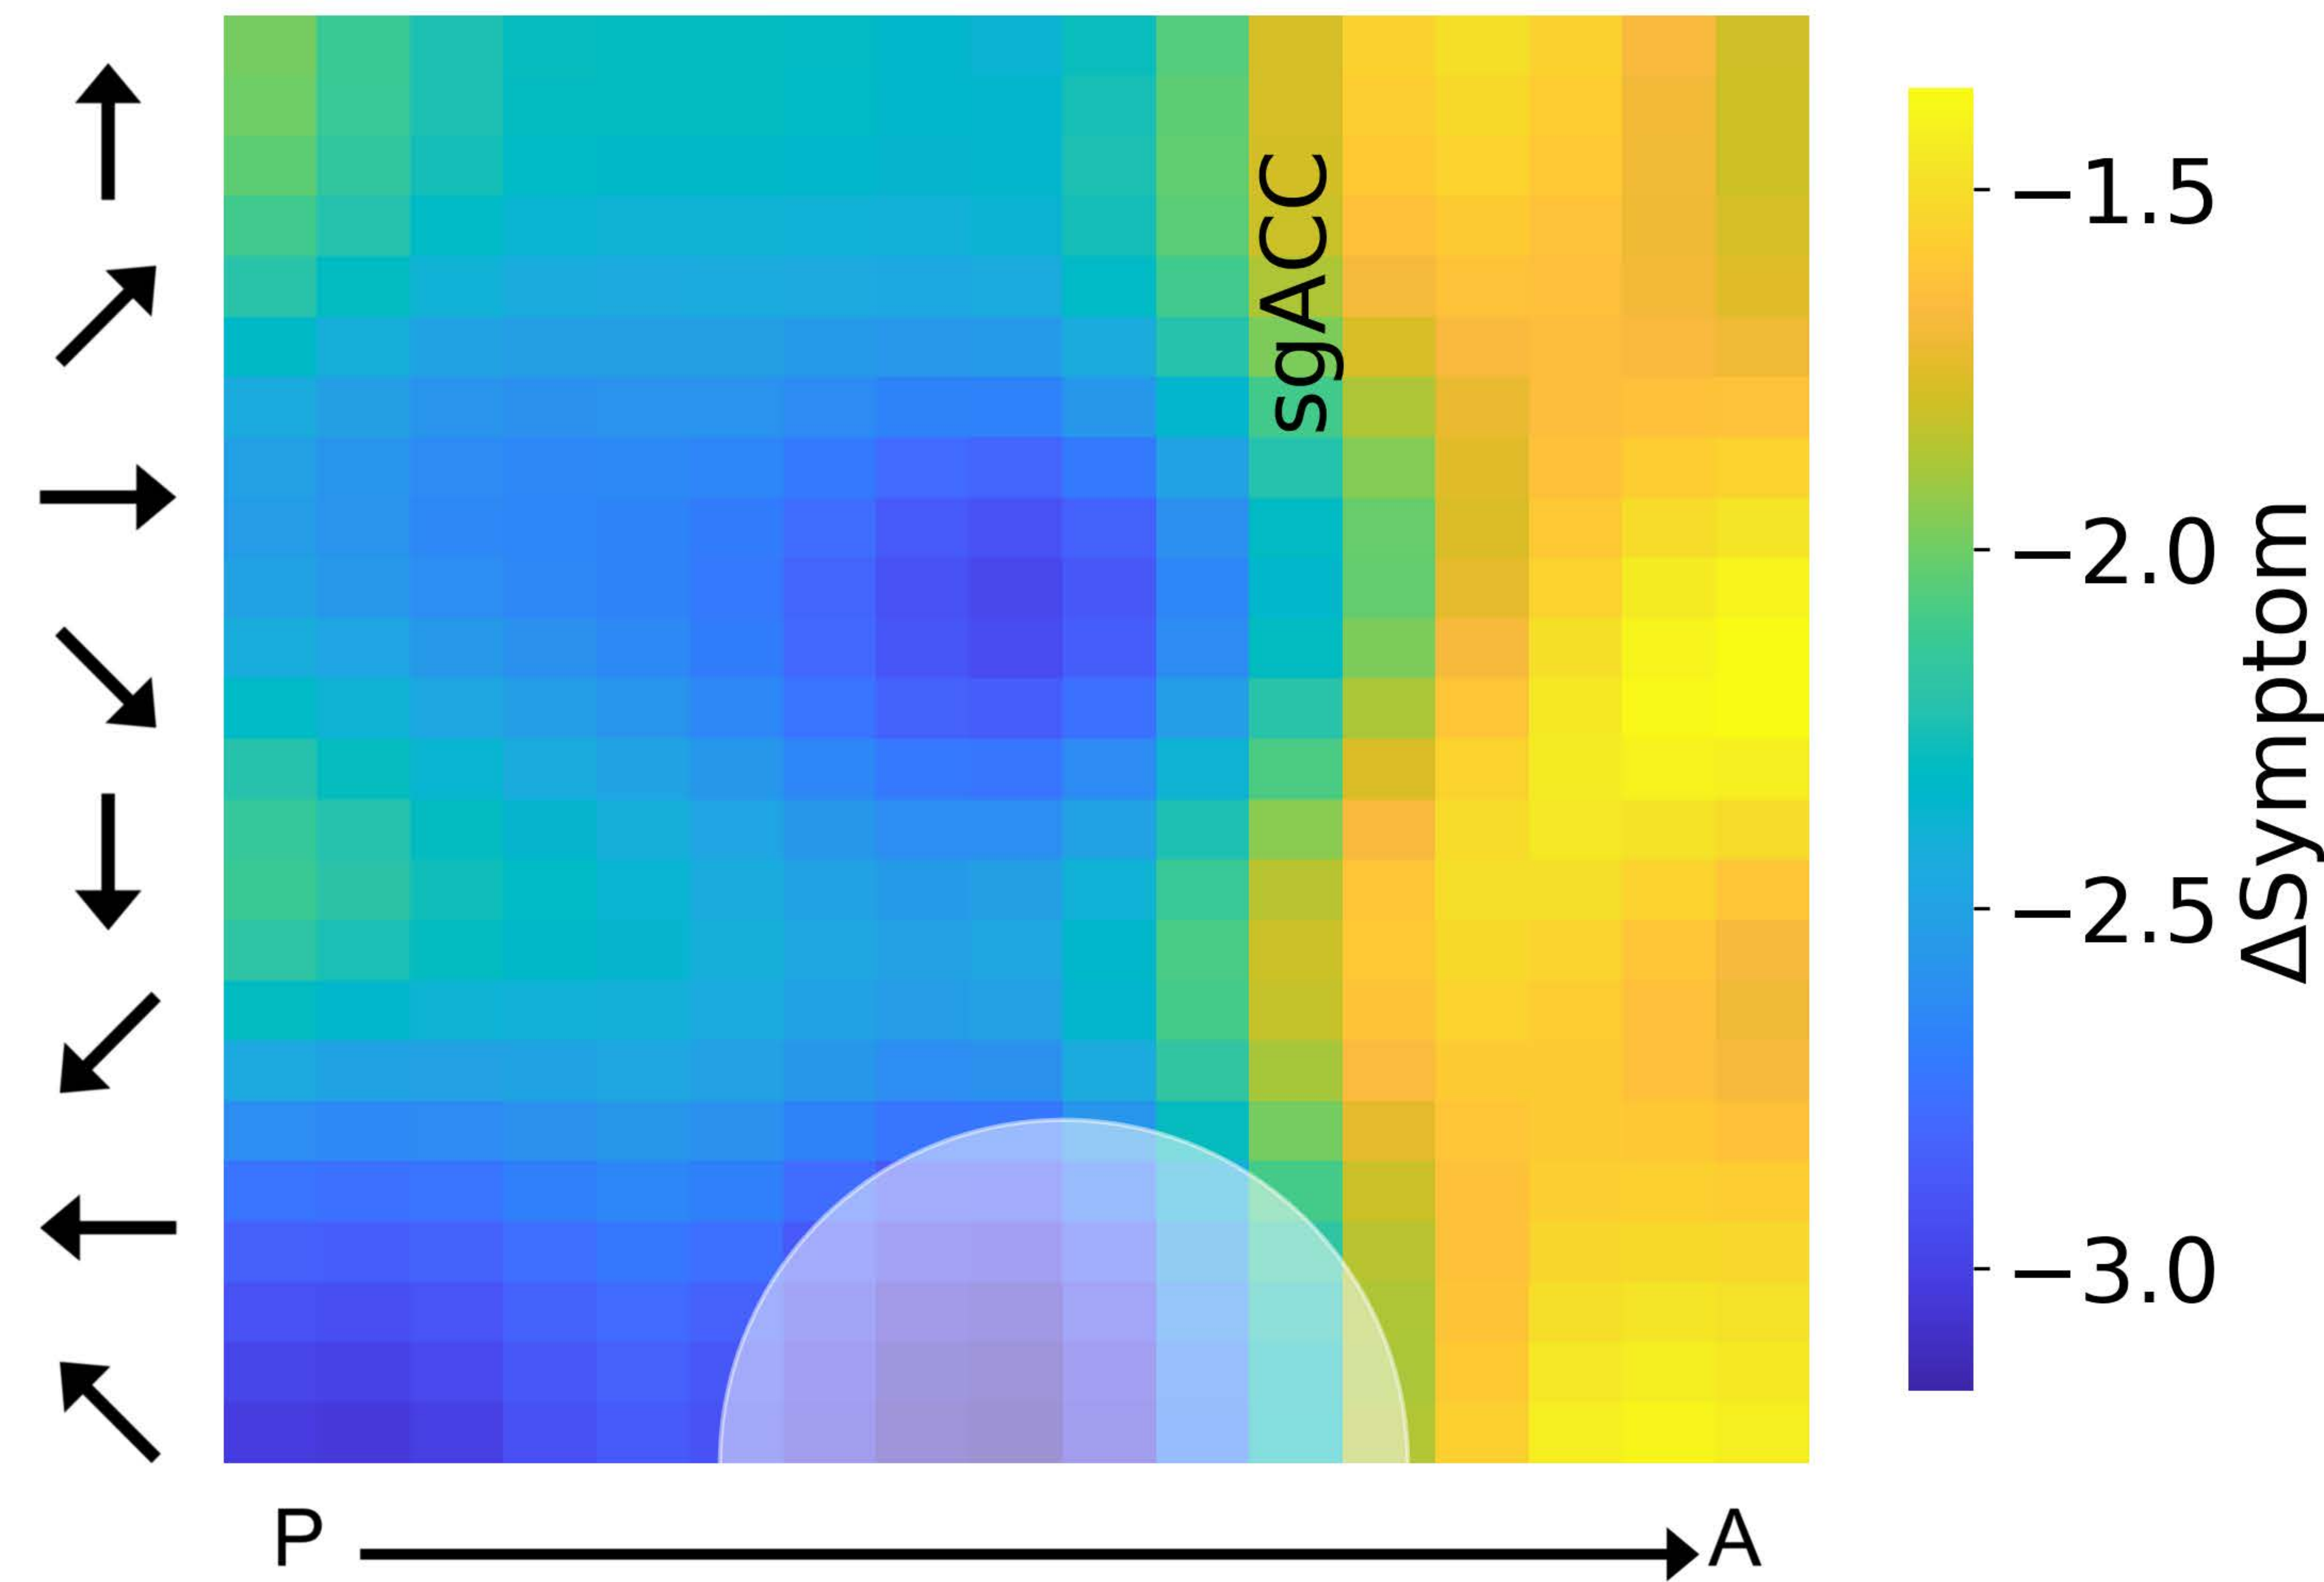



NDARYE405JJL\_madrs\_right\_dlpfc

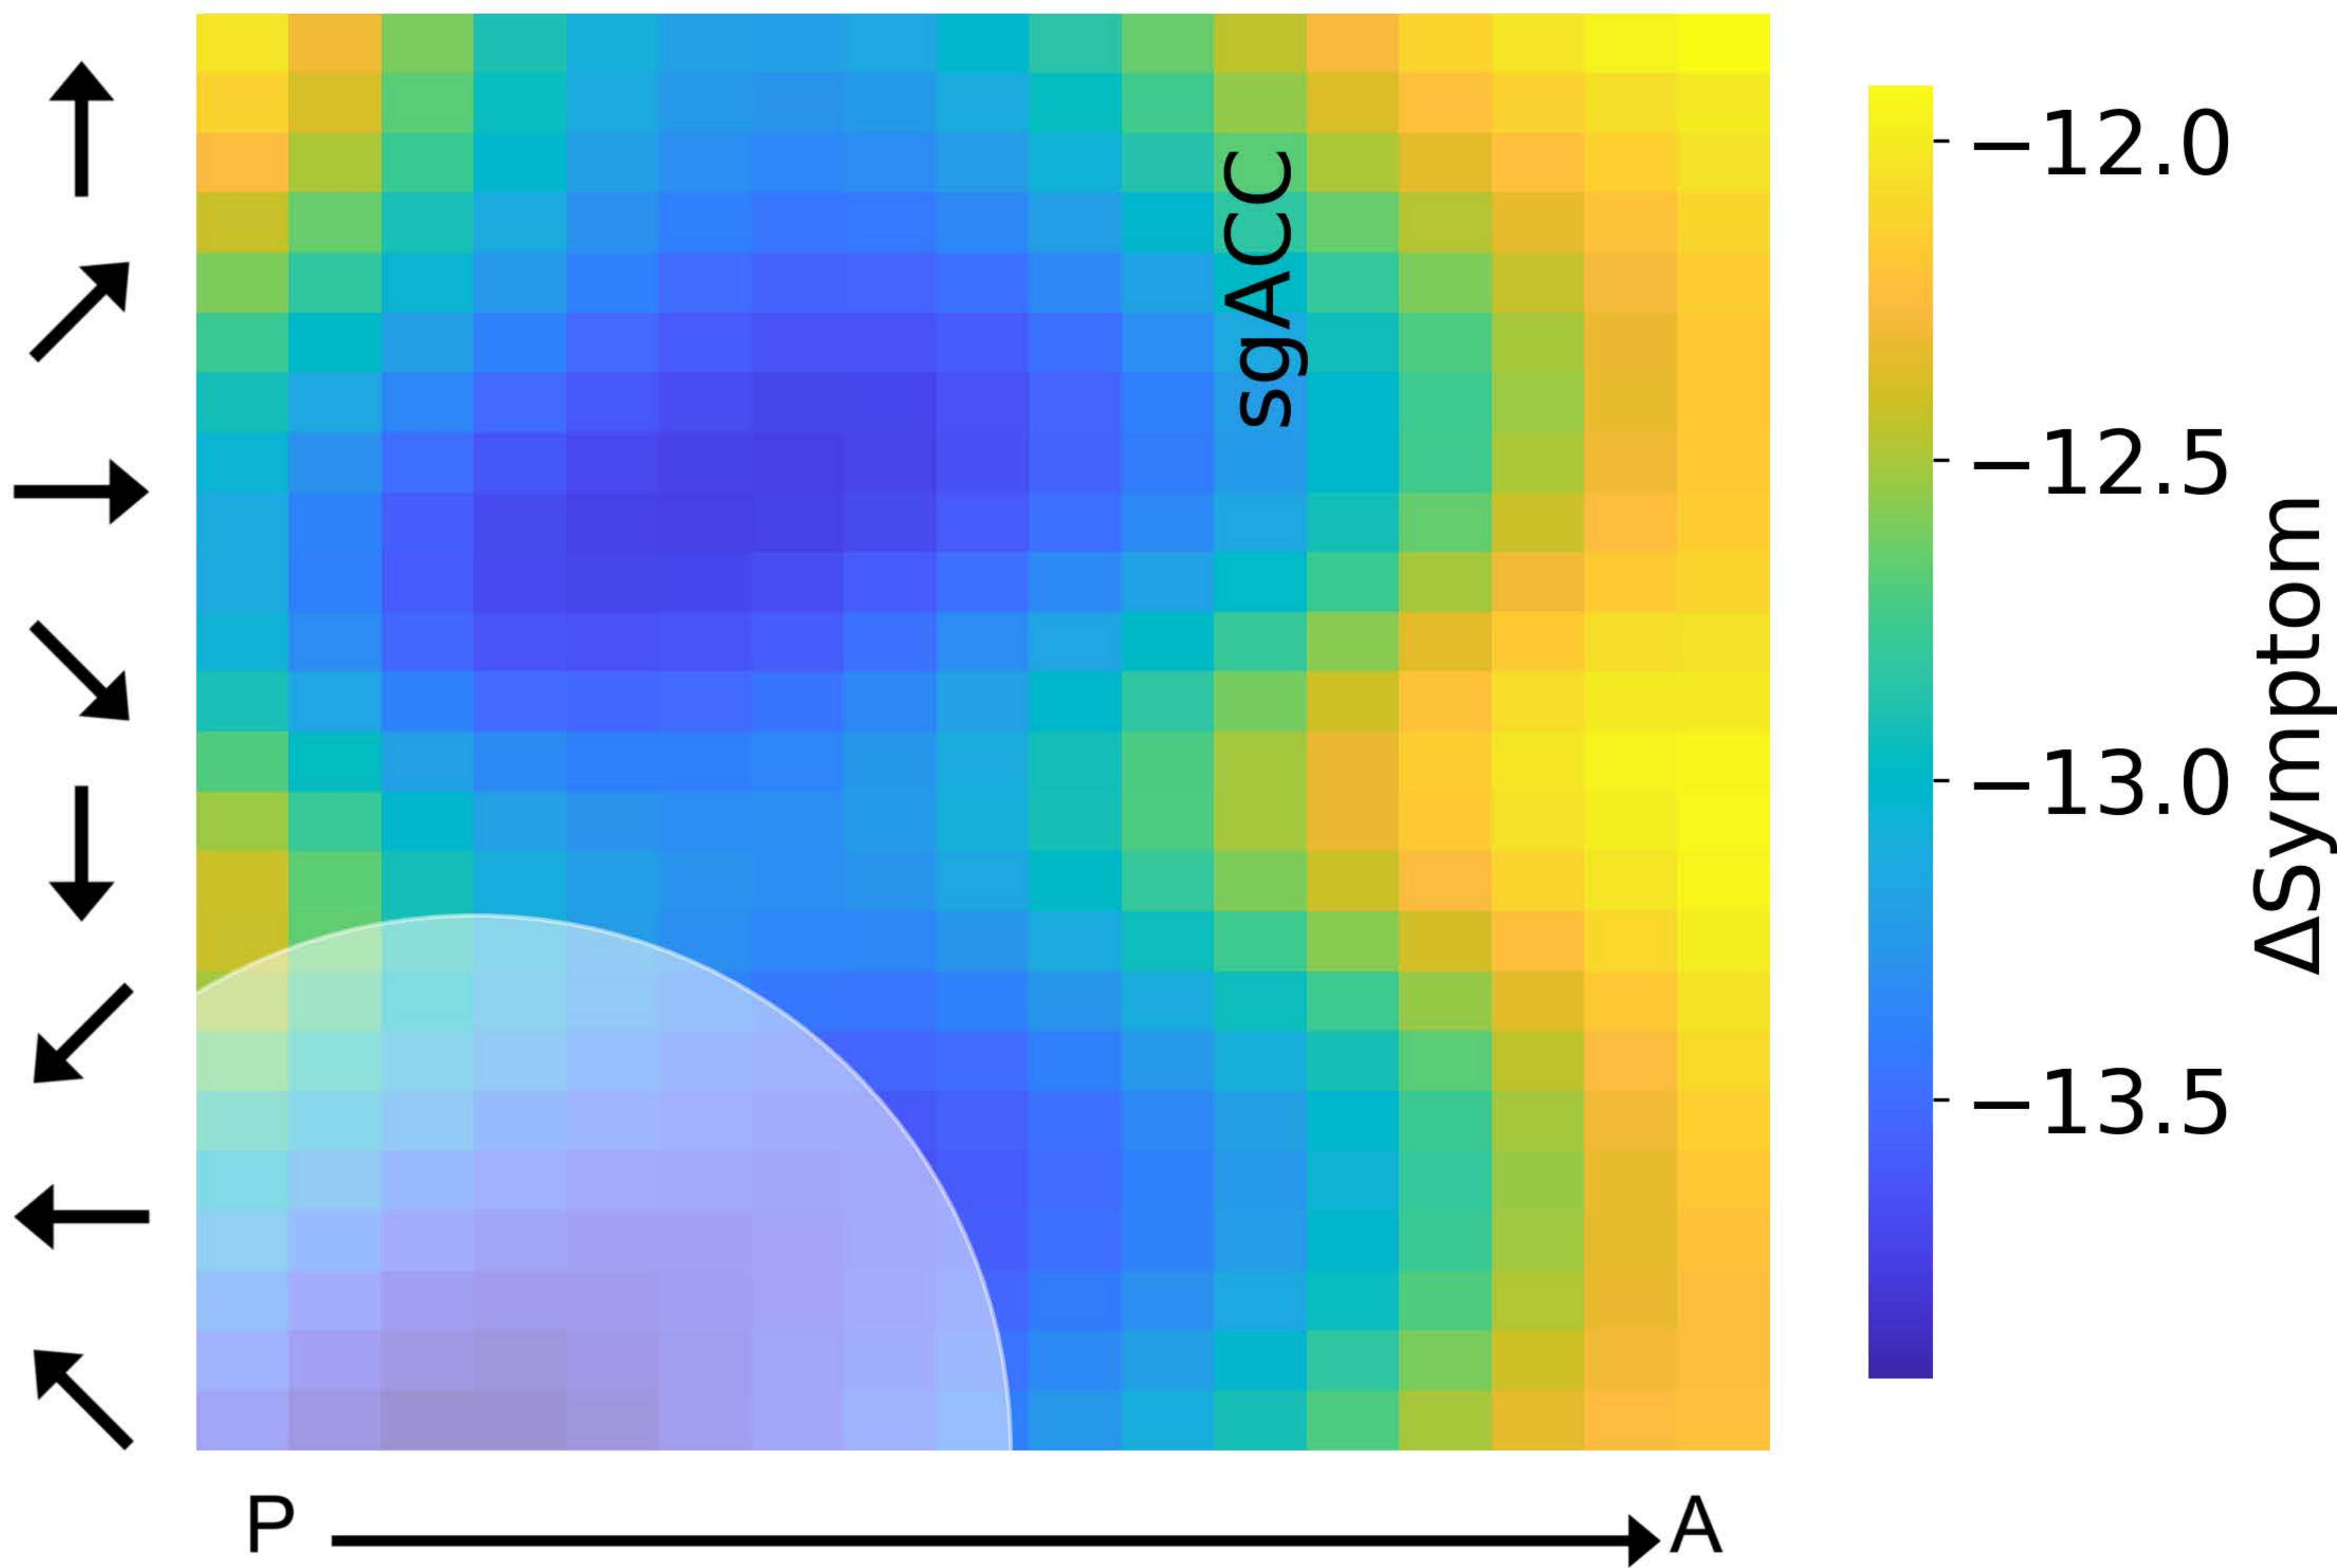



# NDARYM648GK3\_madrs\_right\_dlpfc

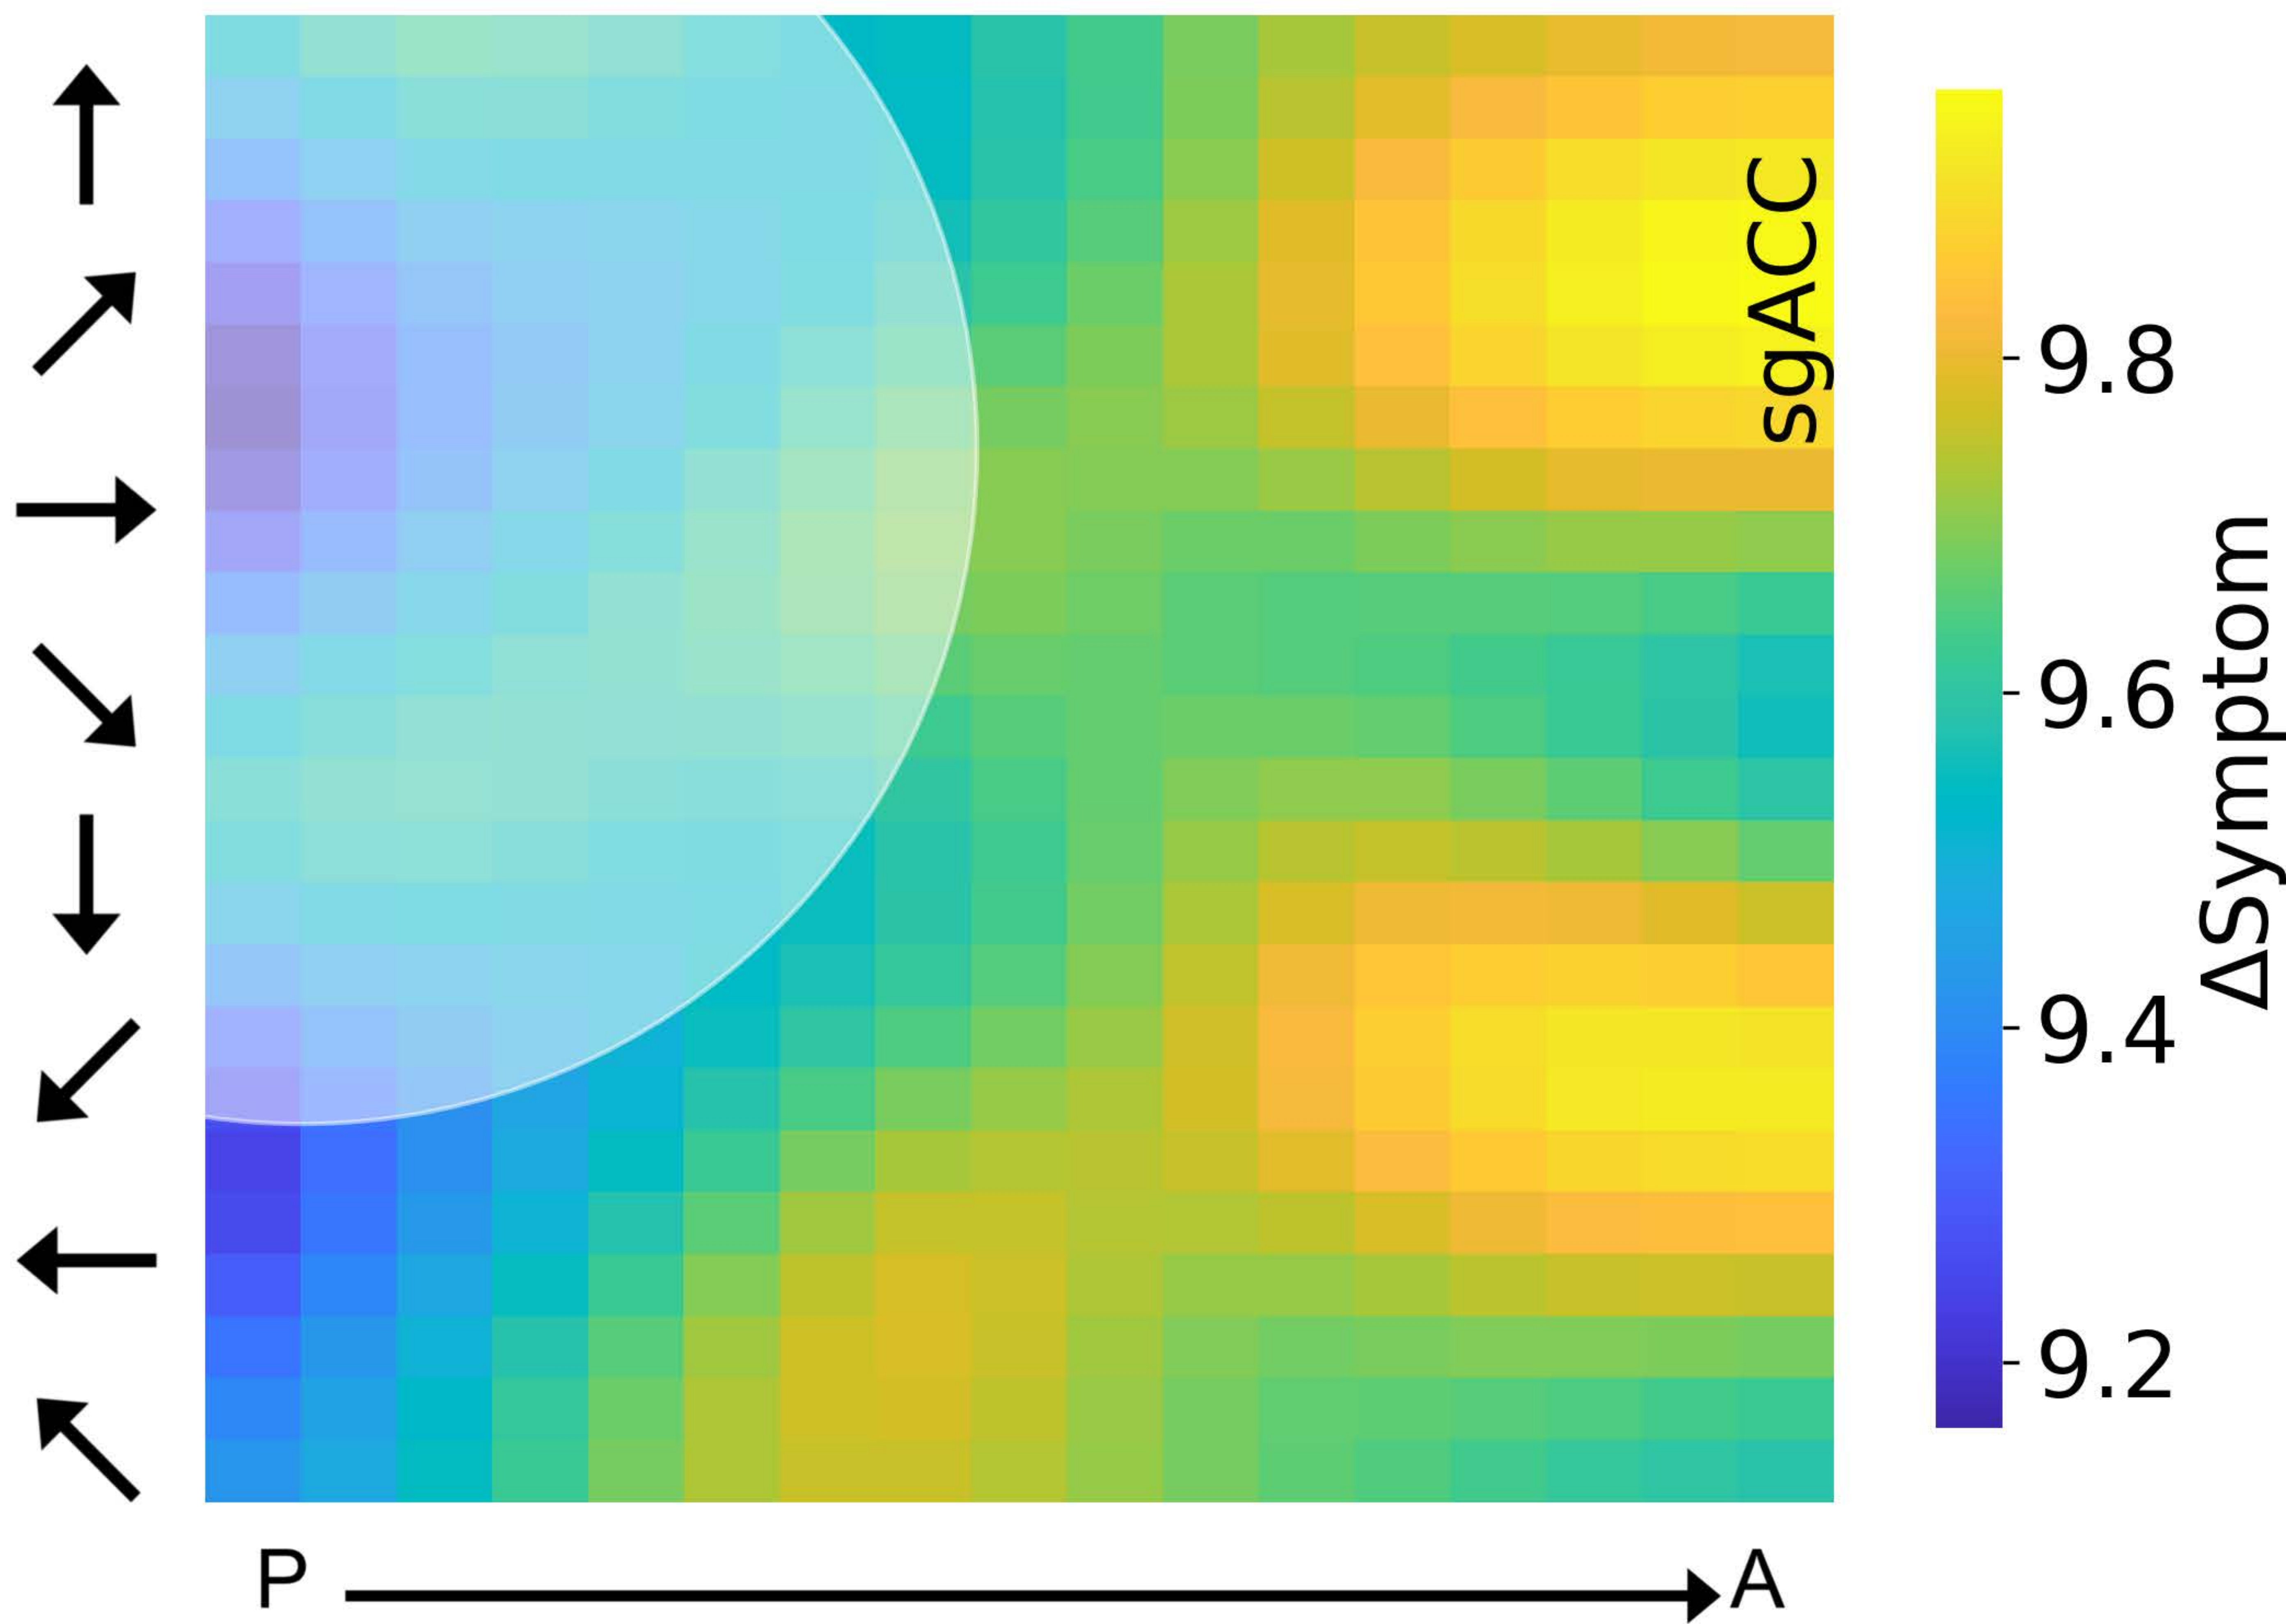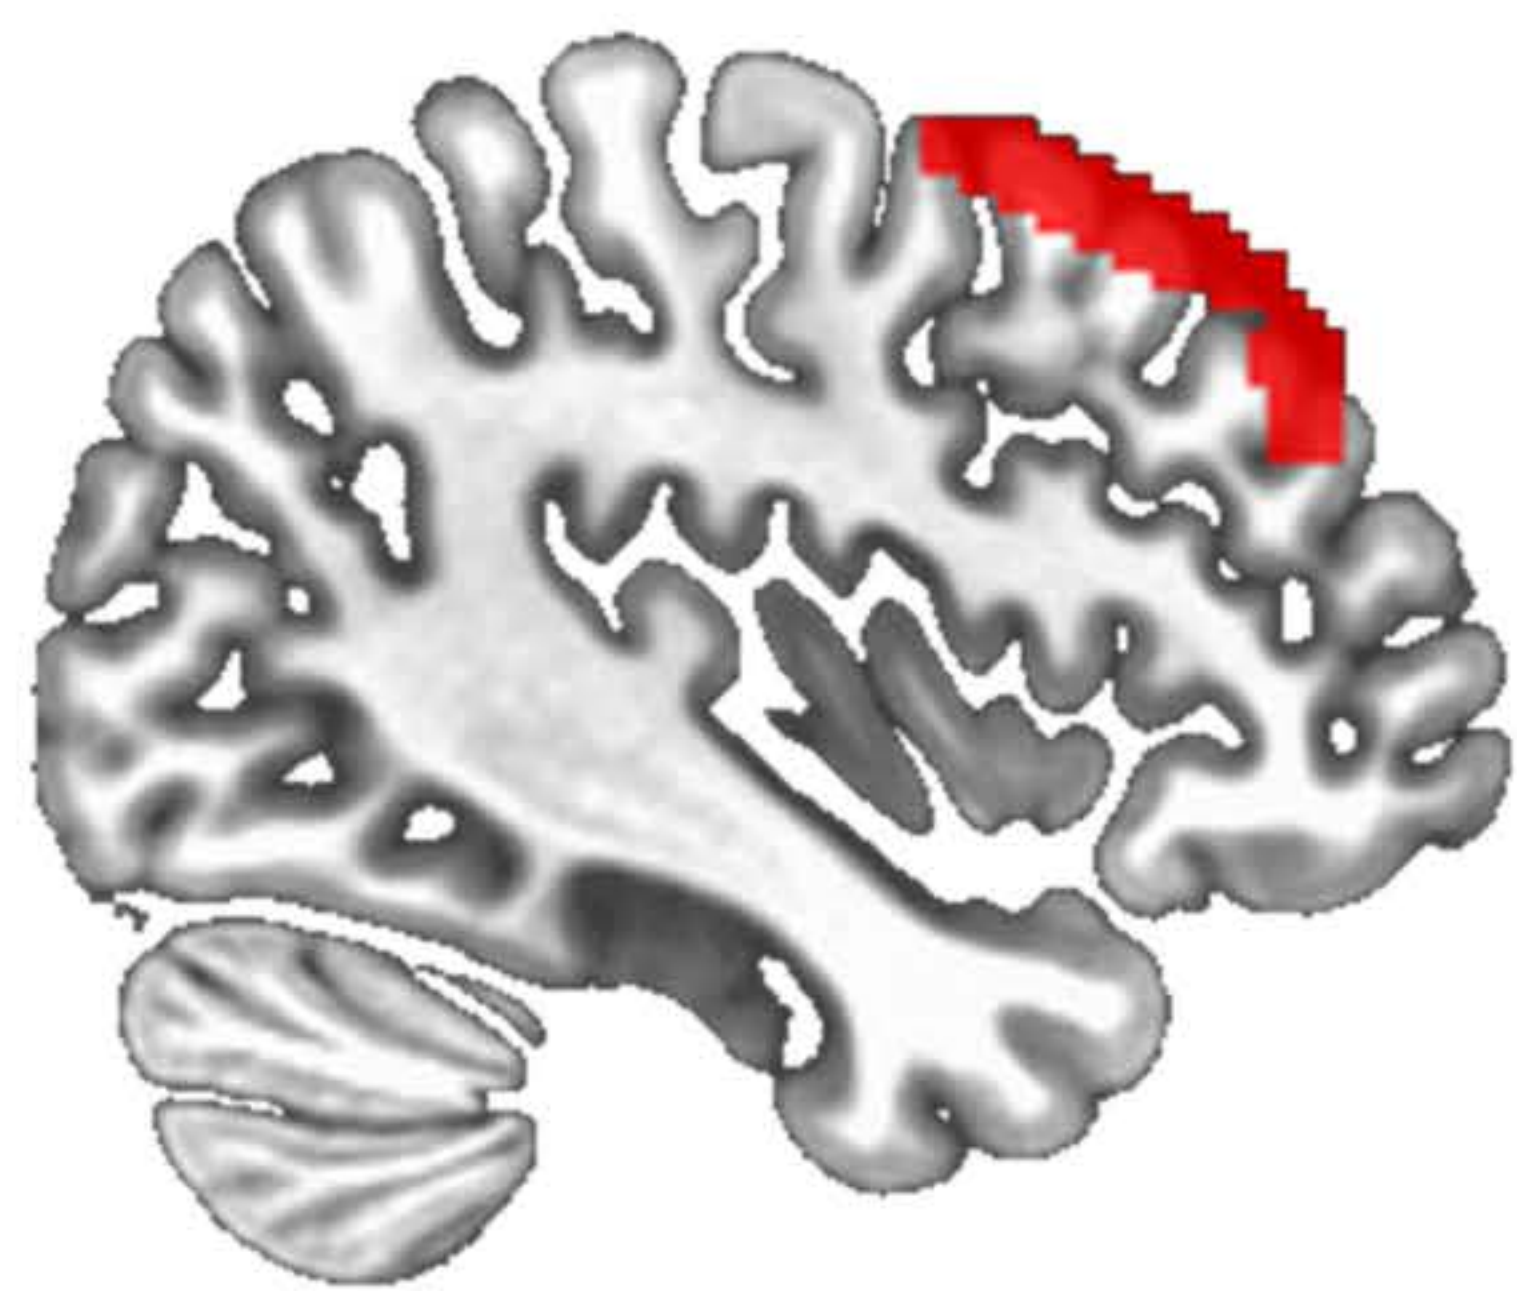



# NDARZH200GZU\_madrs\_right\_dlpfc

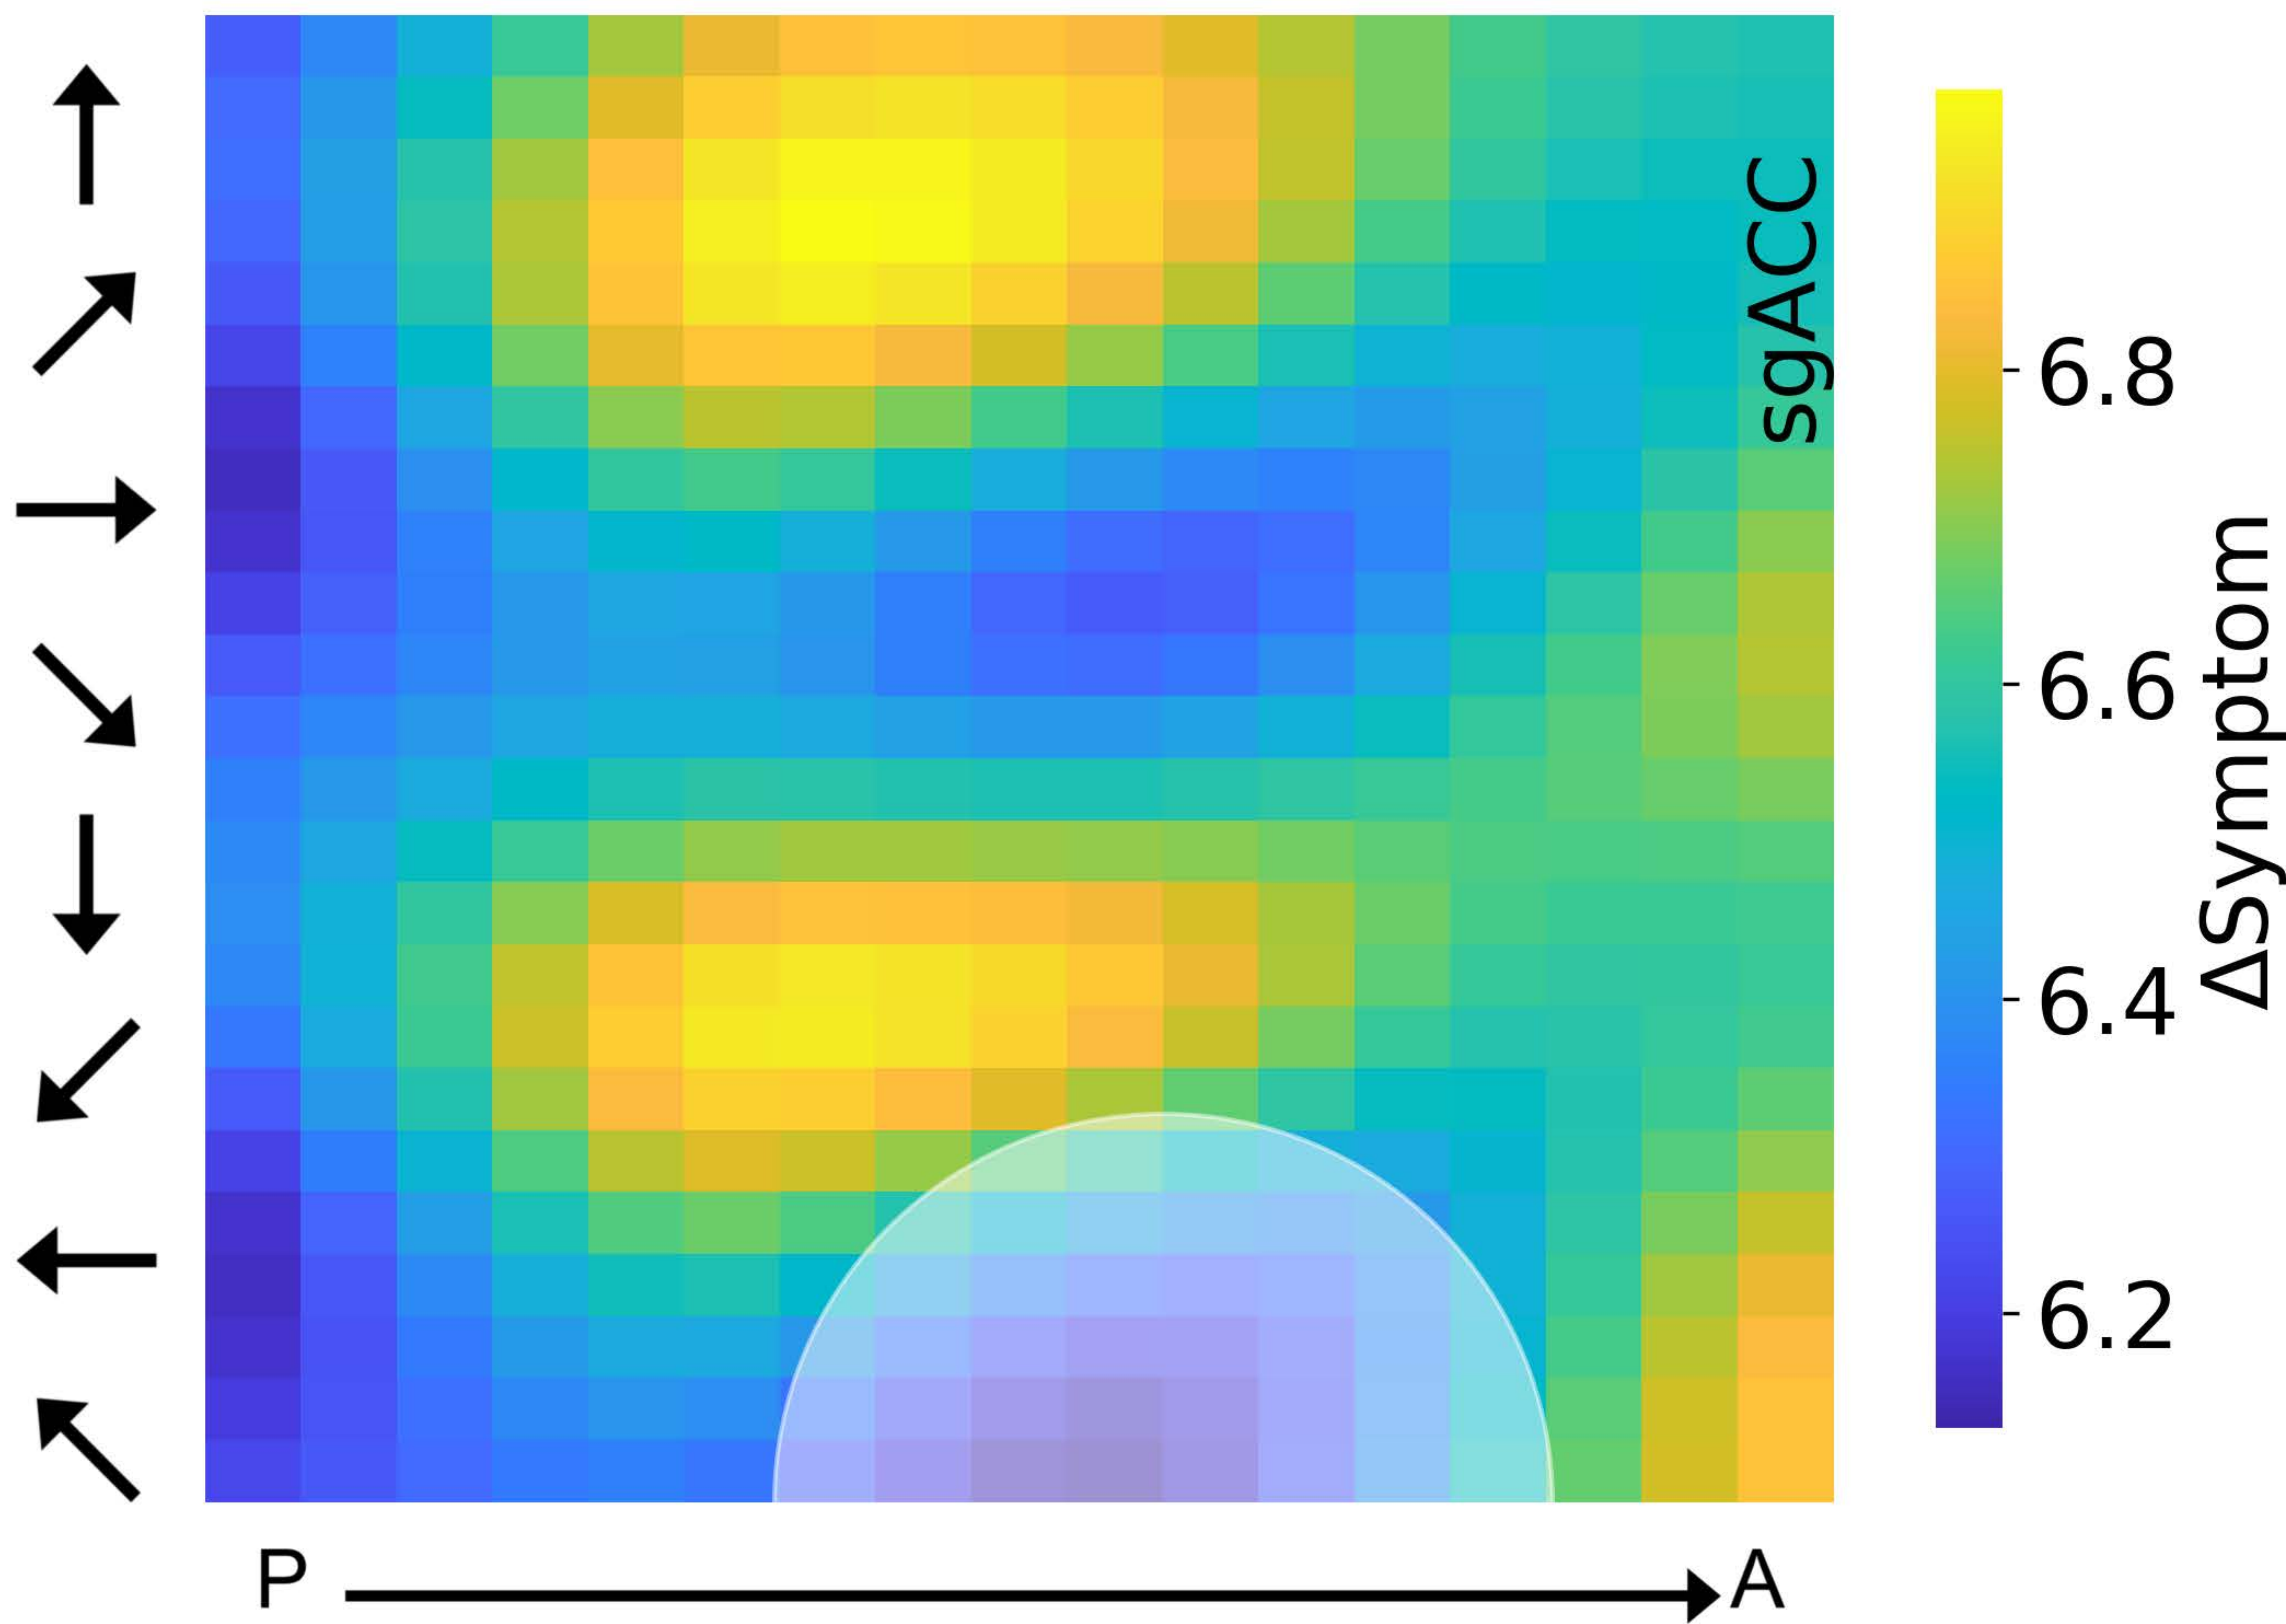



# NDARBB471NAU\_hamd\_left\_dlpfc

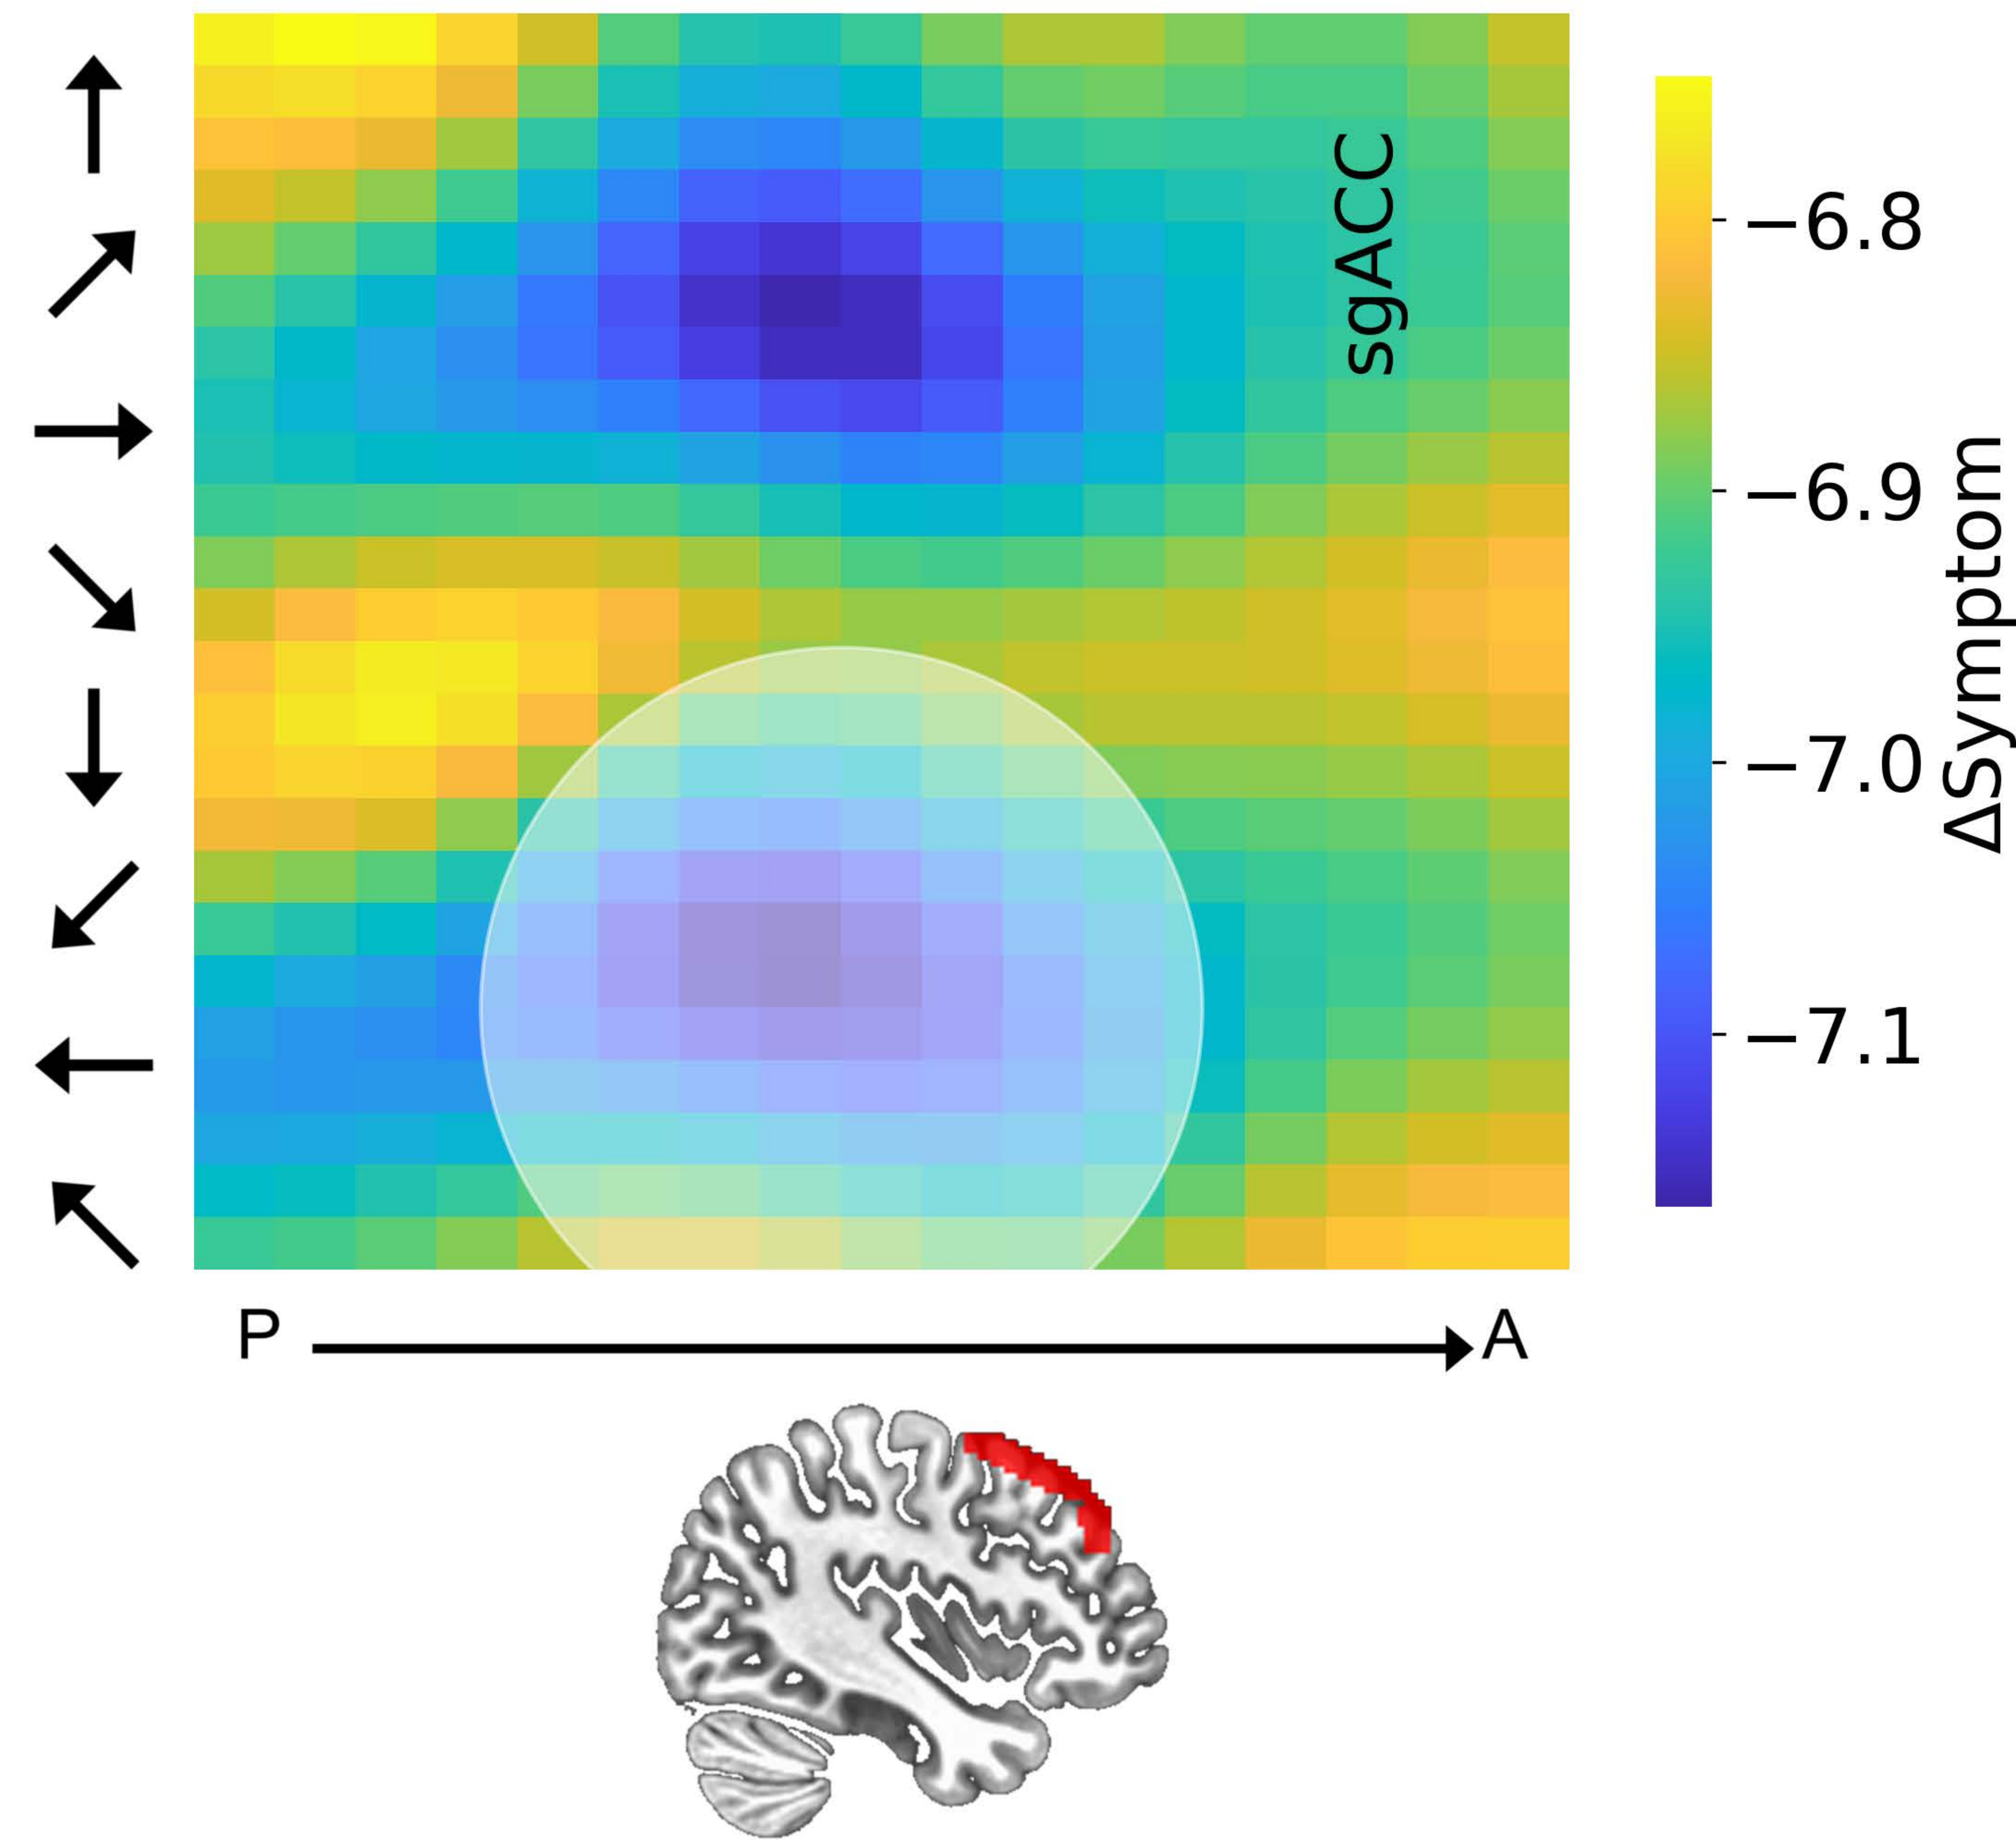



# NDARBG497RE1\_hamd\_left\_dlpfc

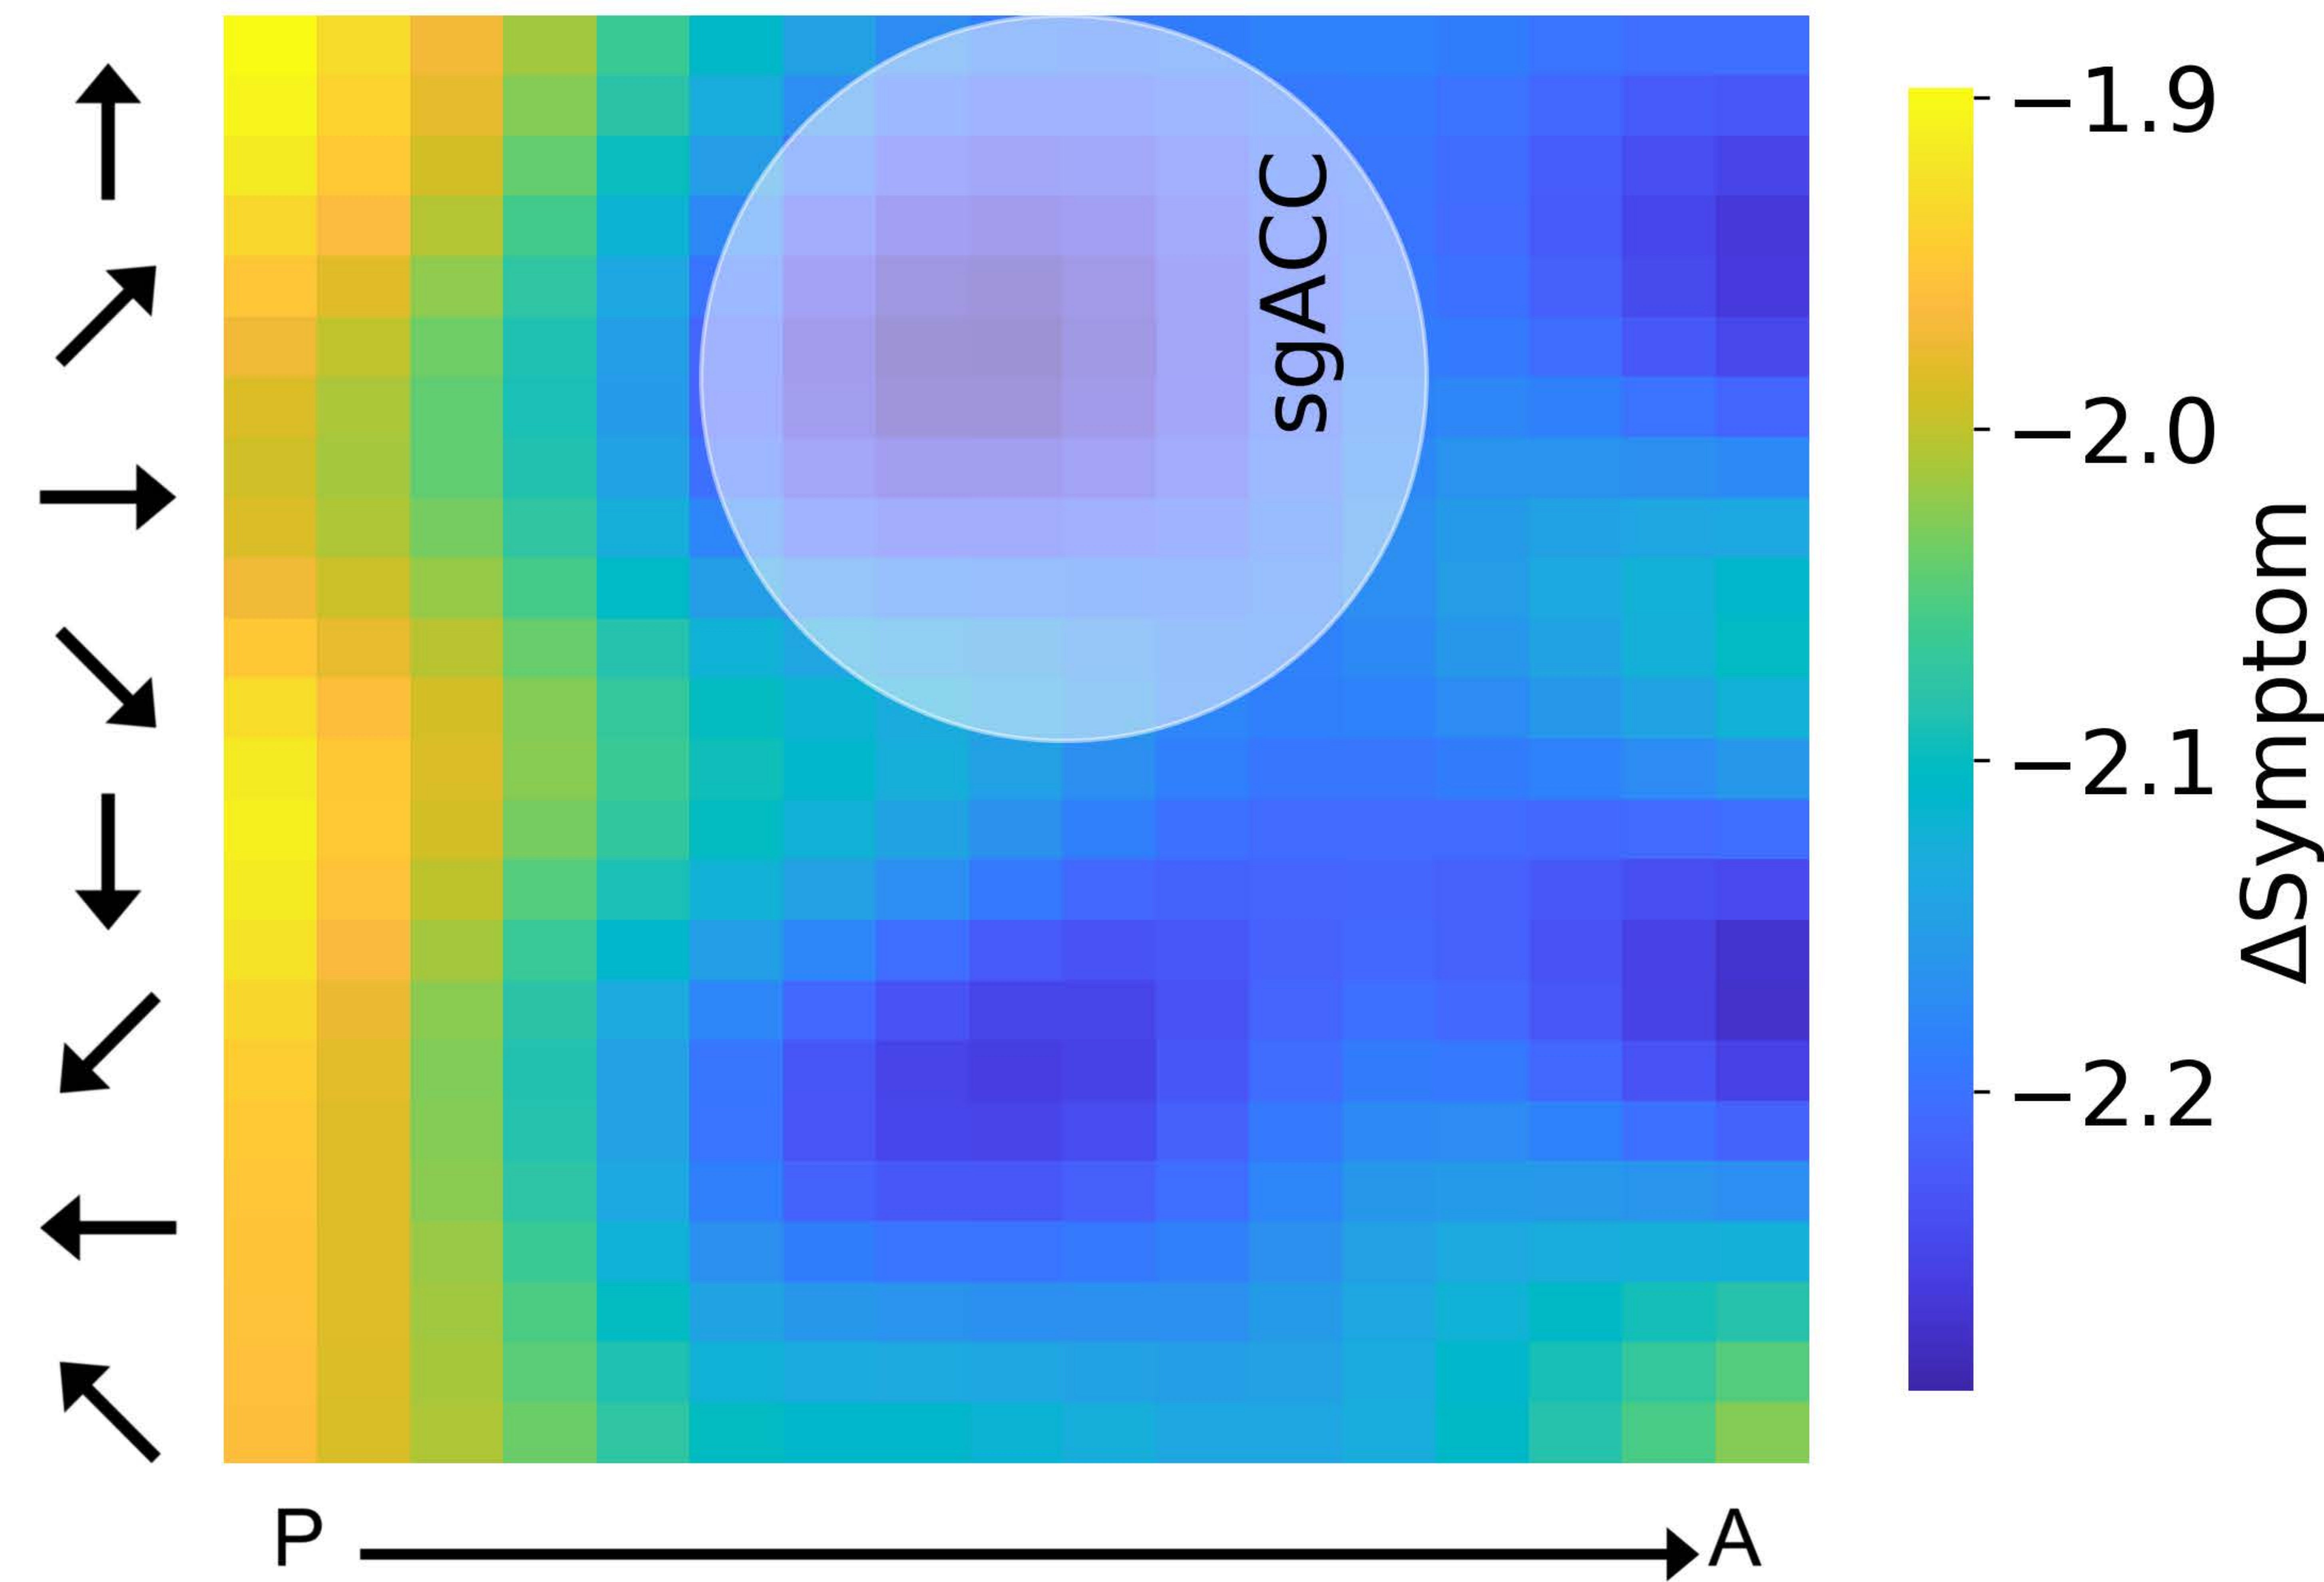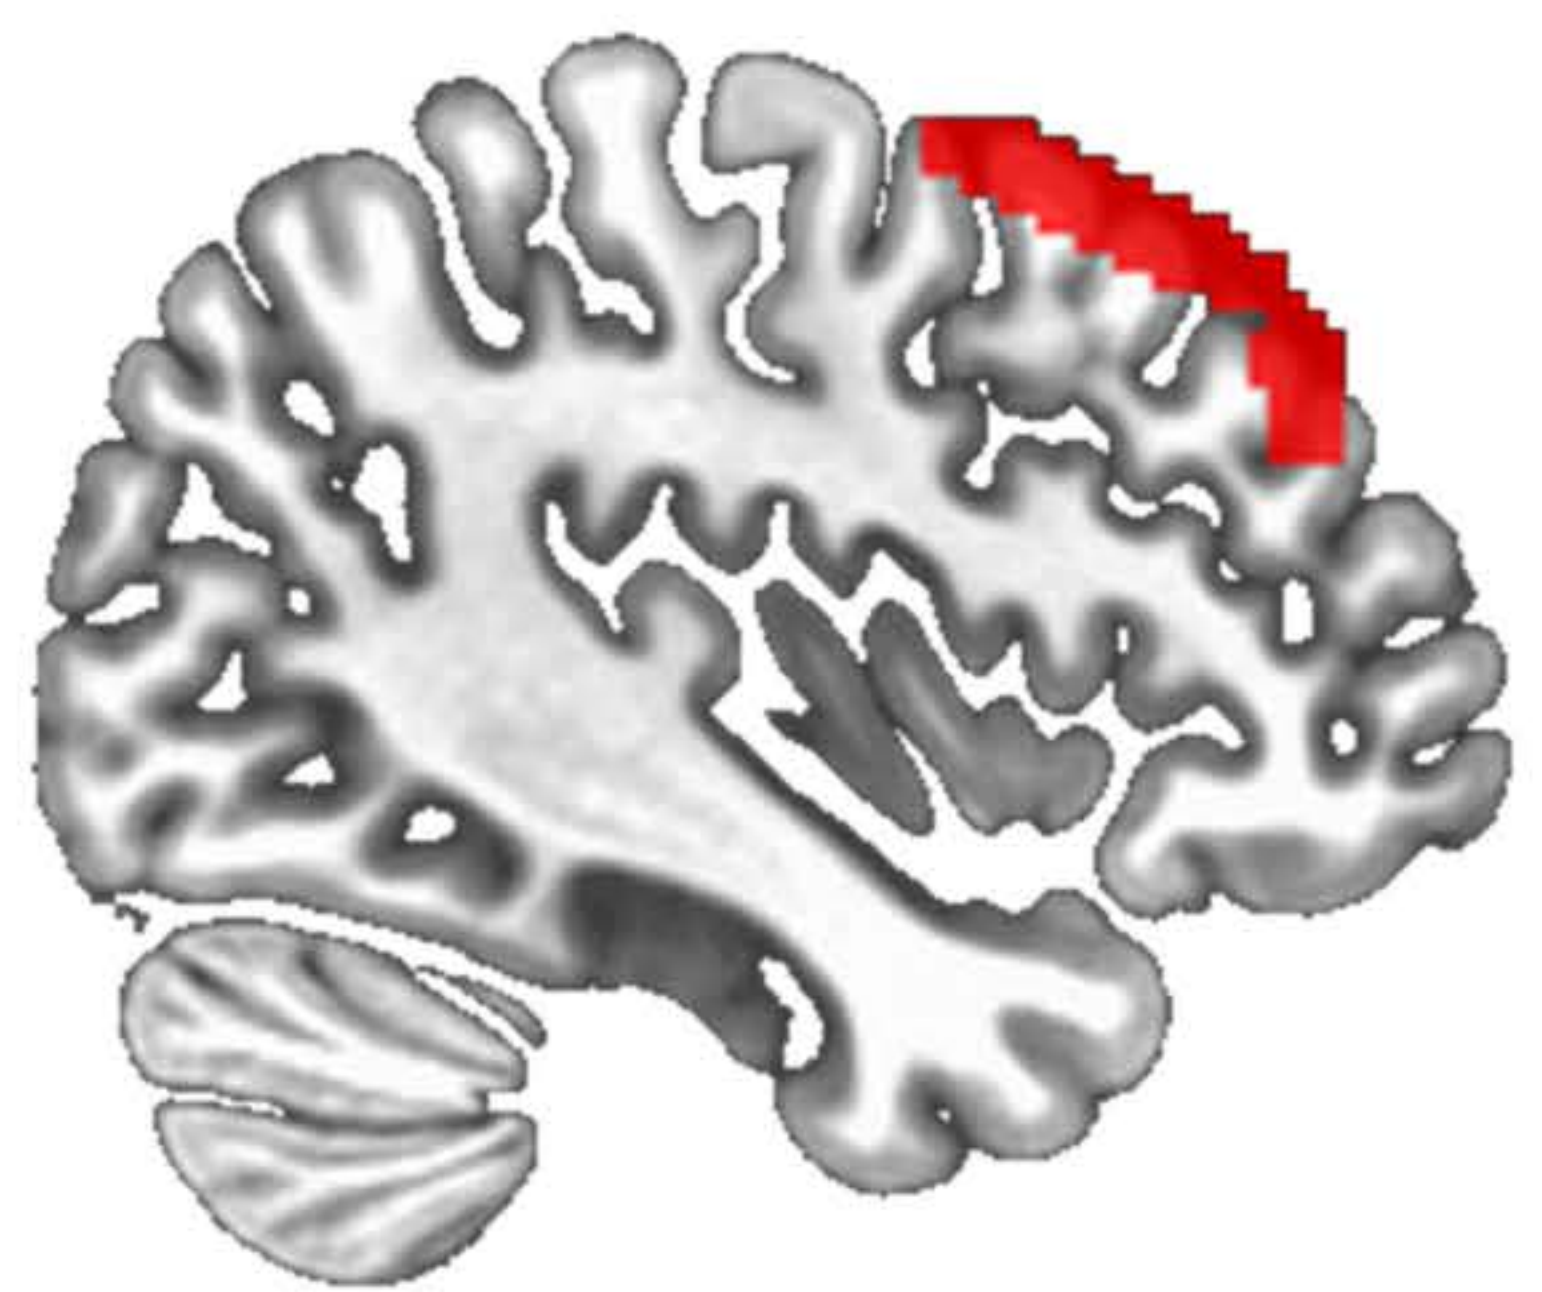



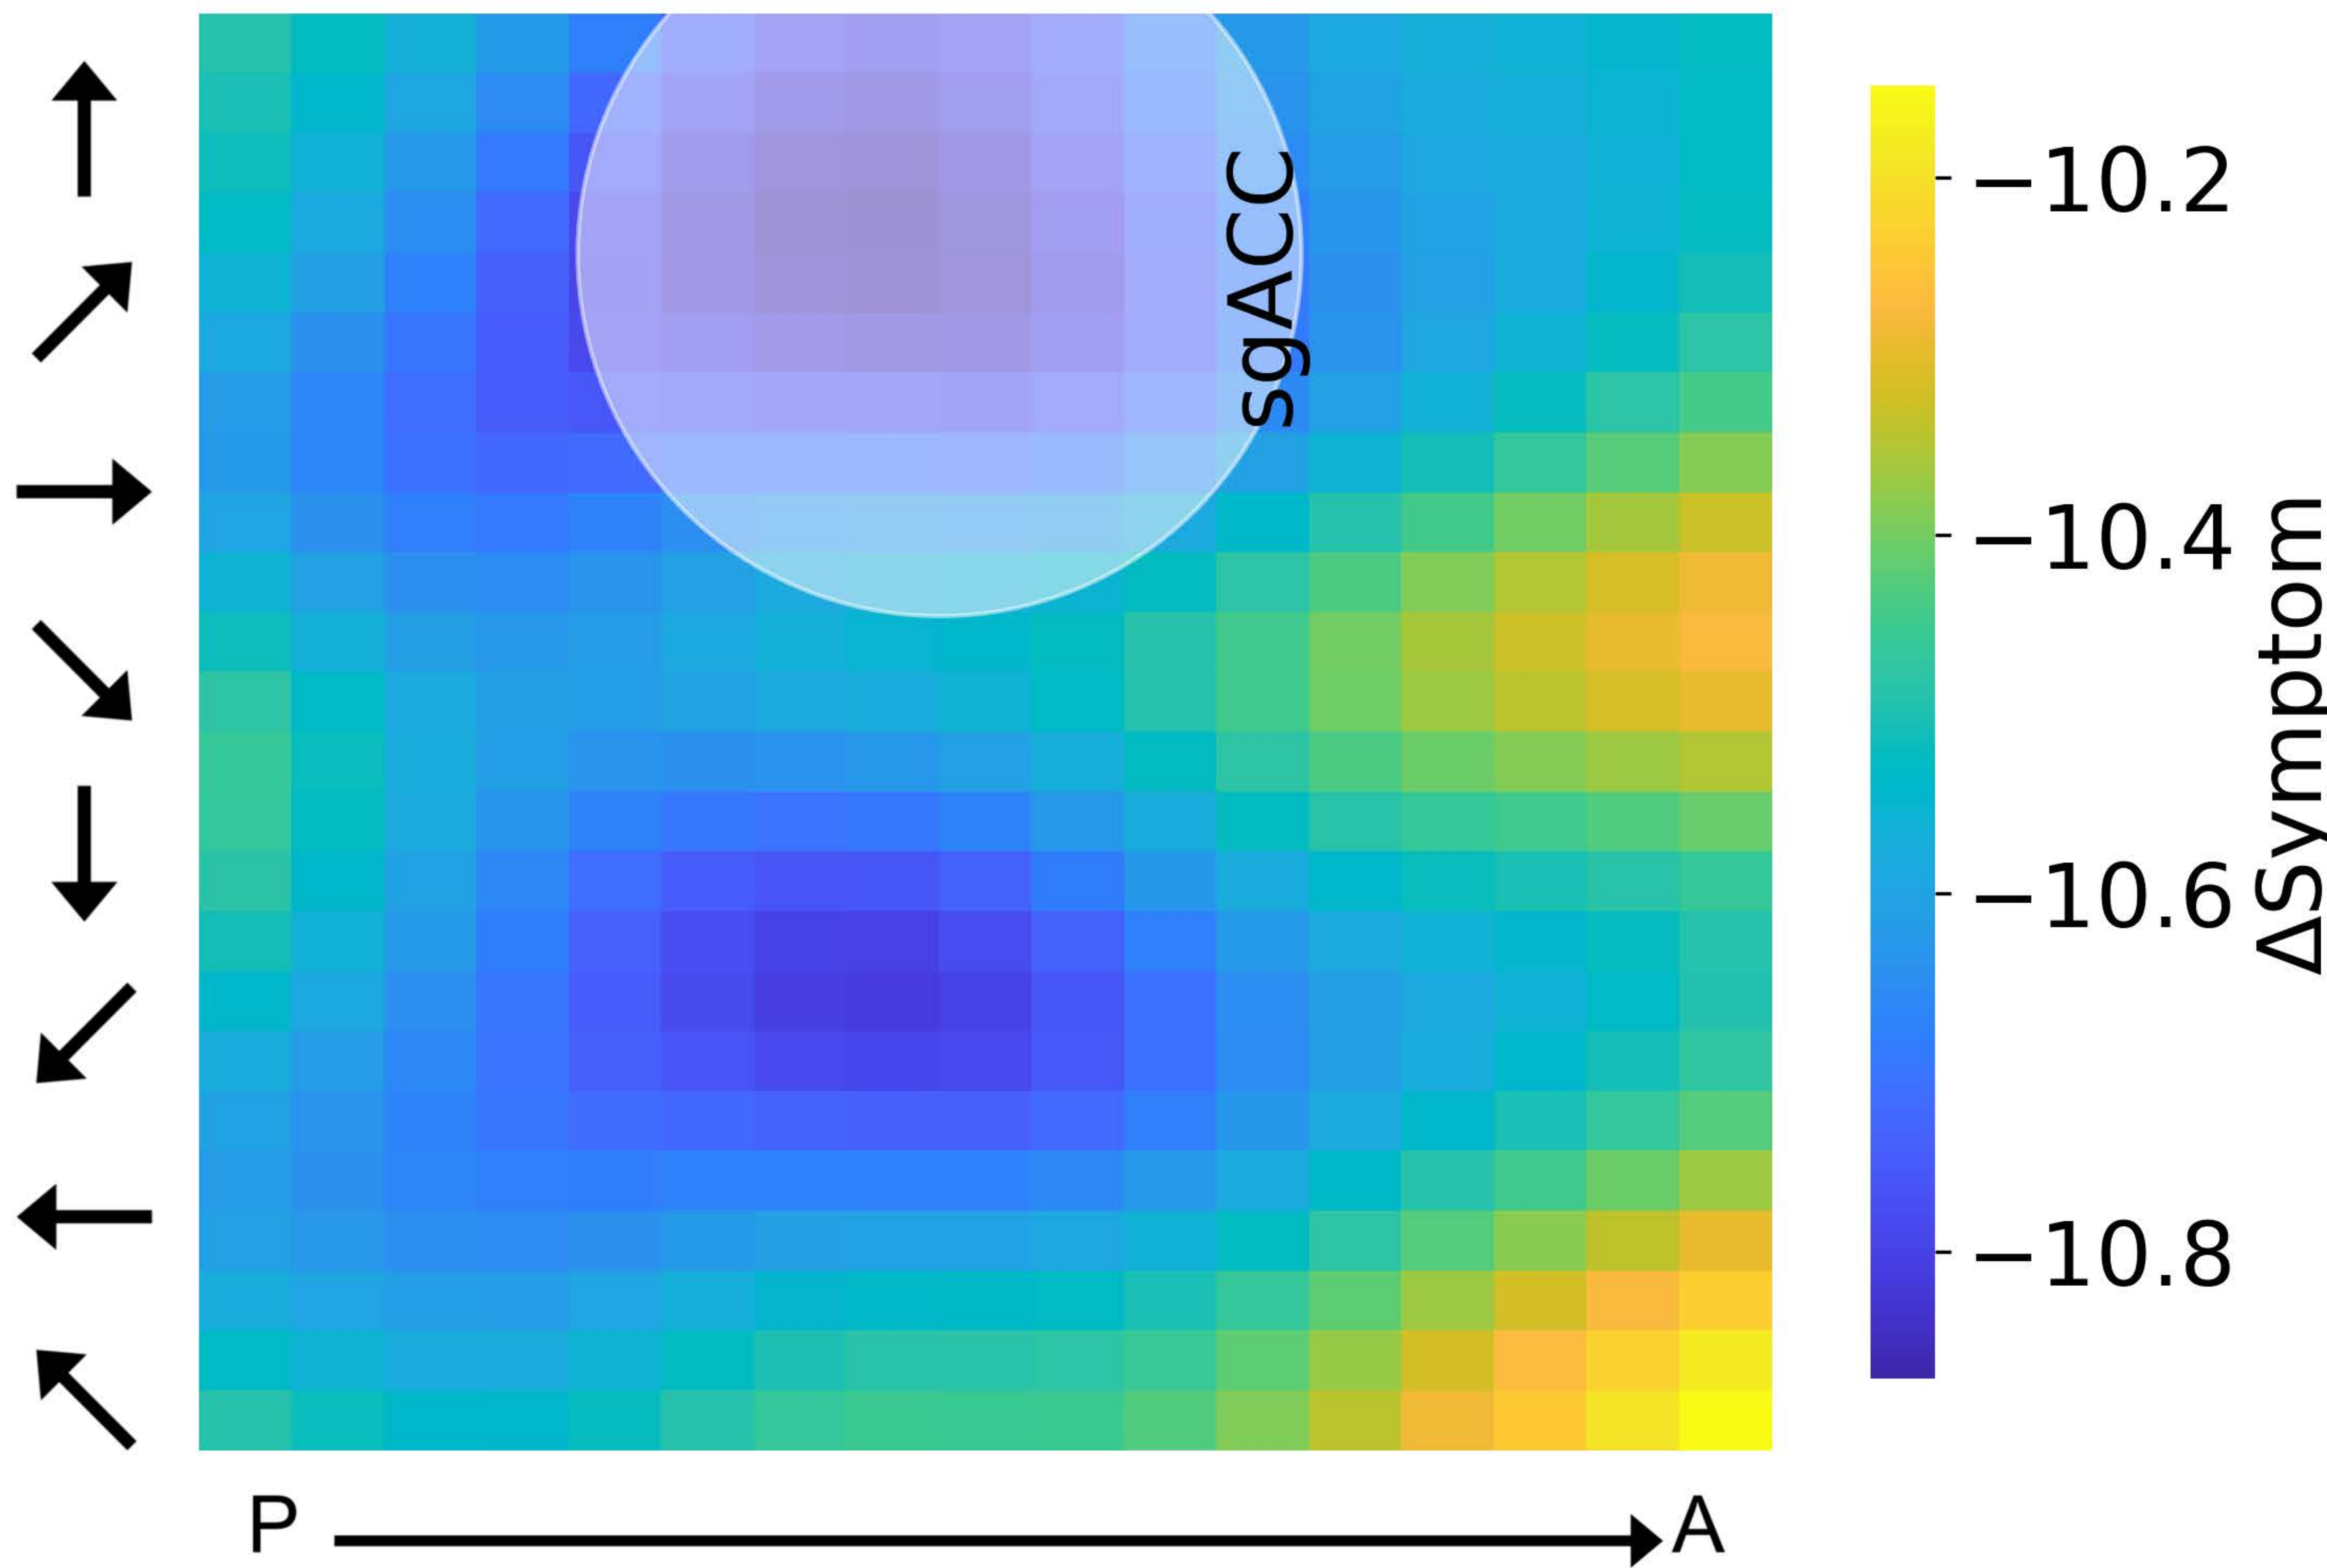



# NDARBL814BJK\_hamd\_left\_dlpfc

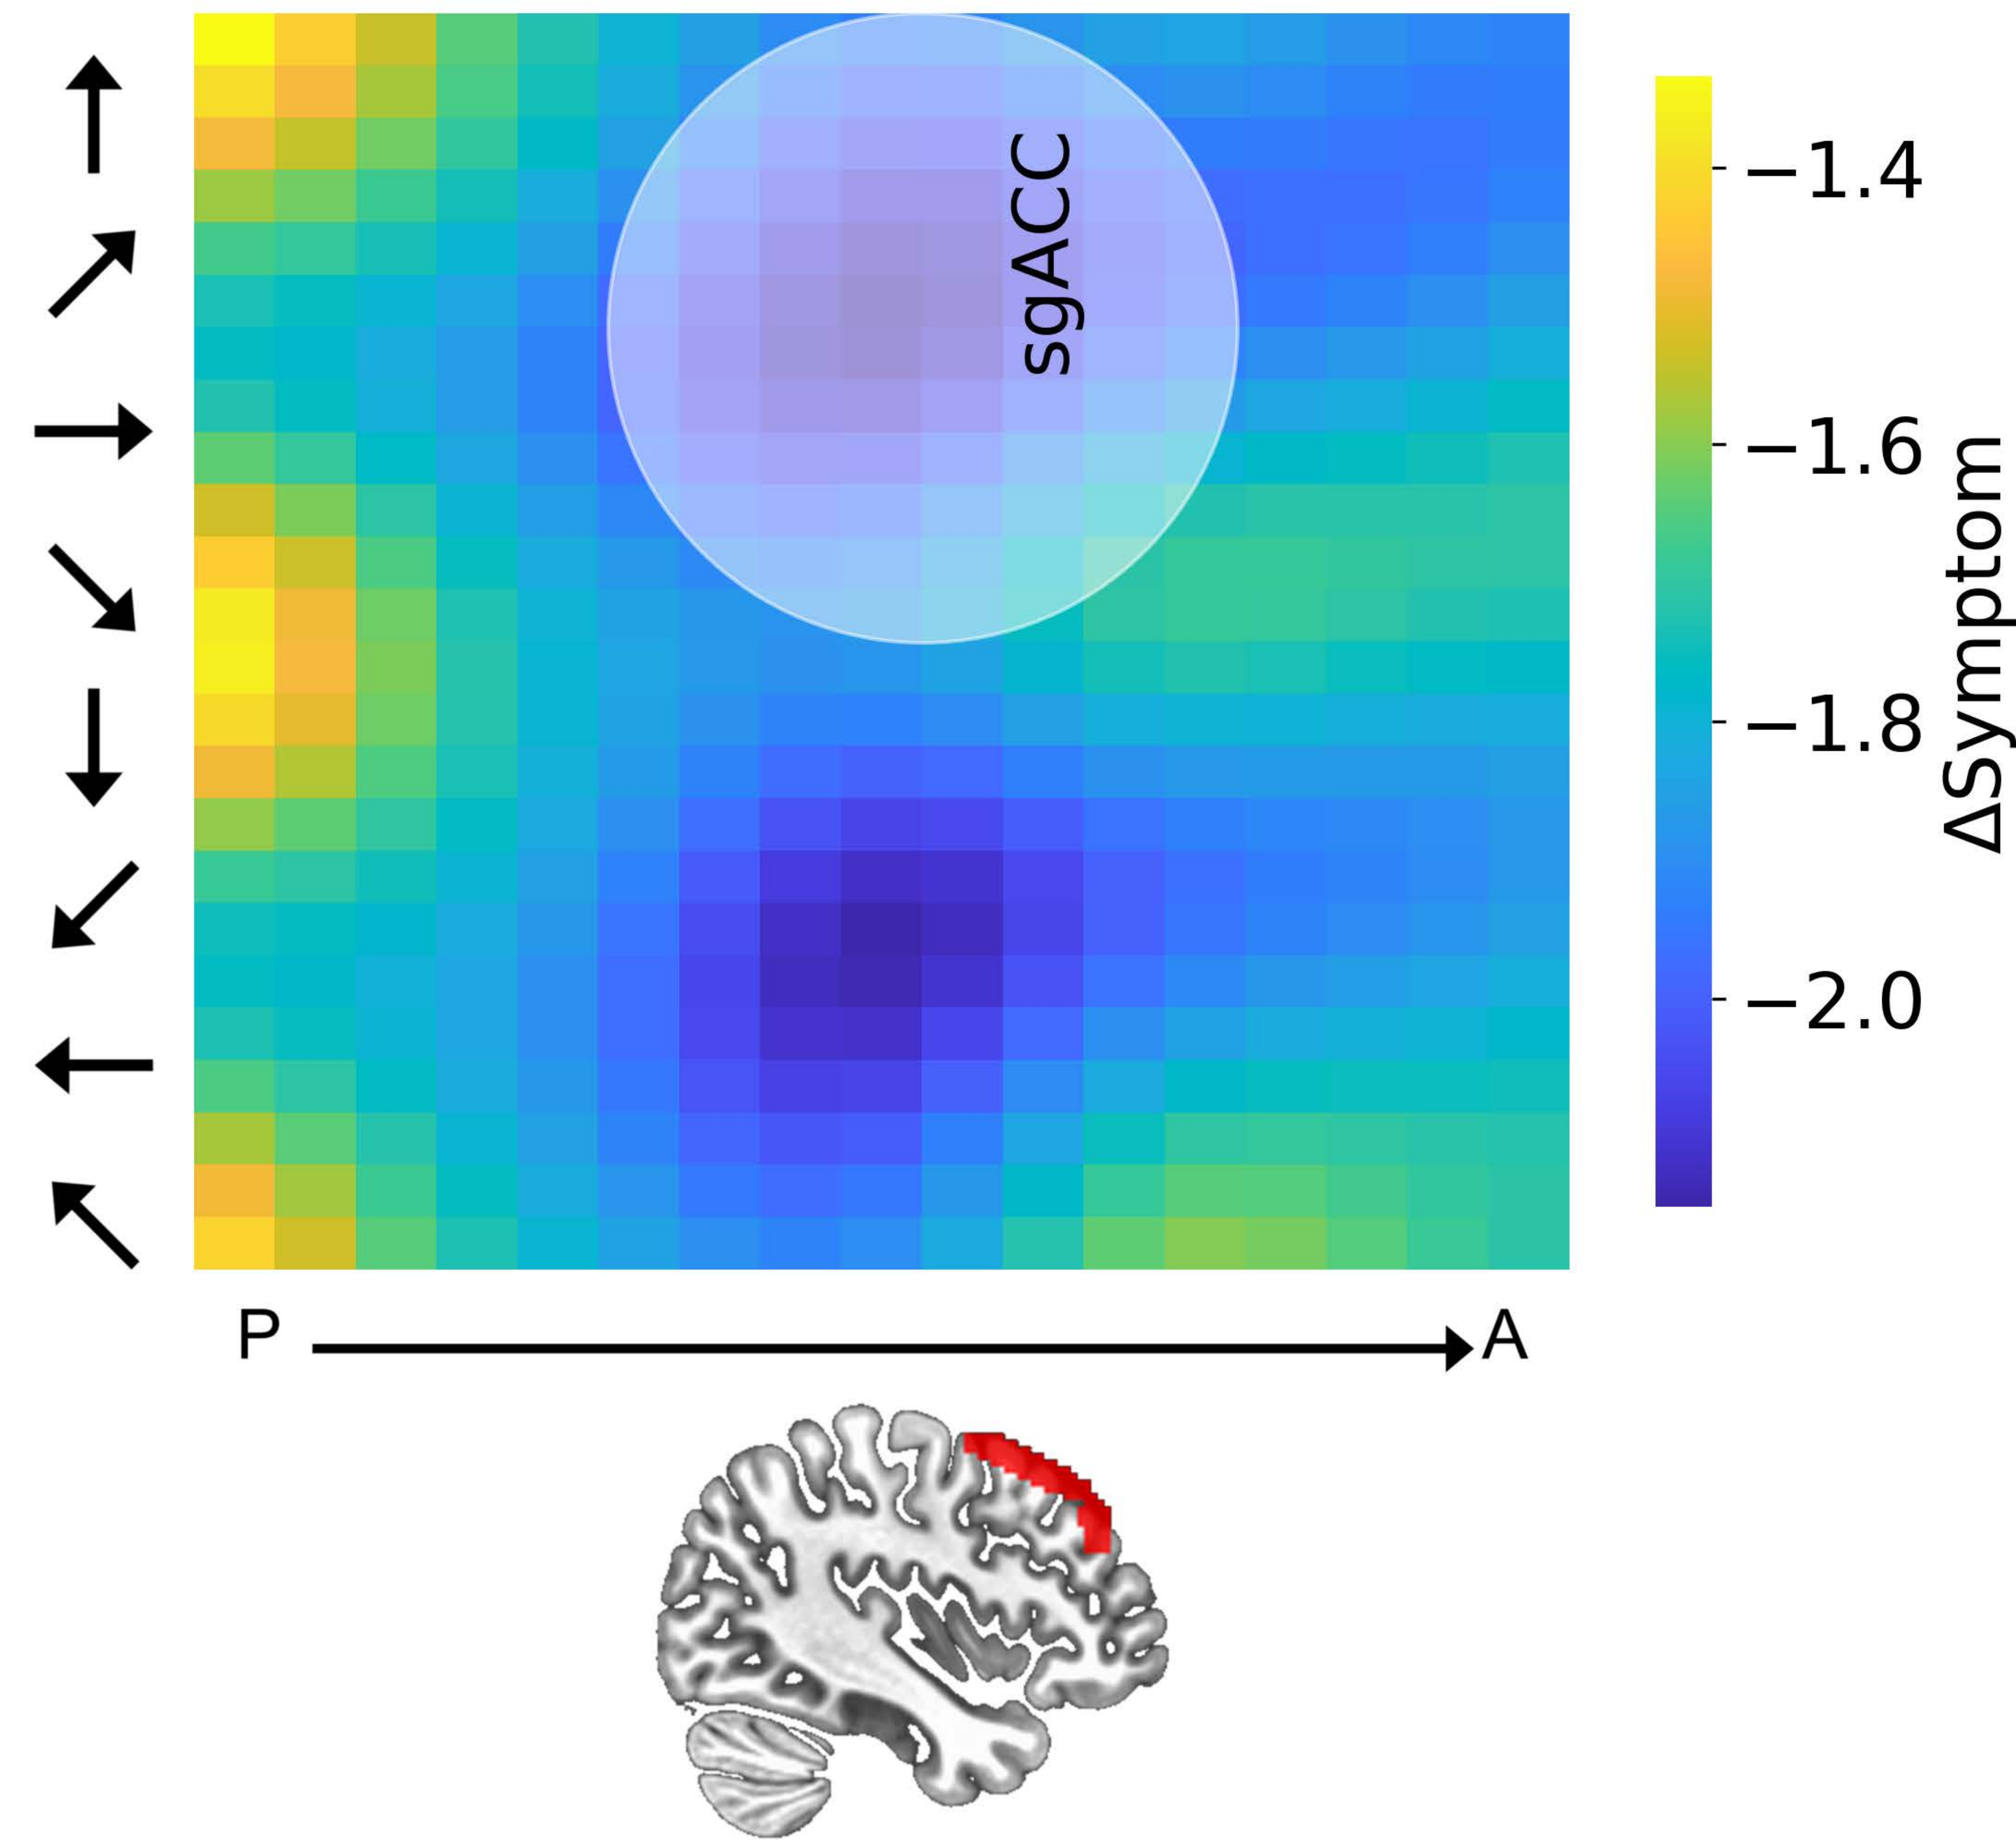



# NDARBP353XD2\_hamd\_left\_dlpfc

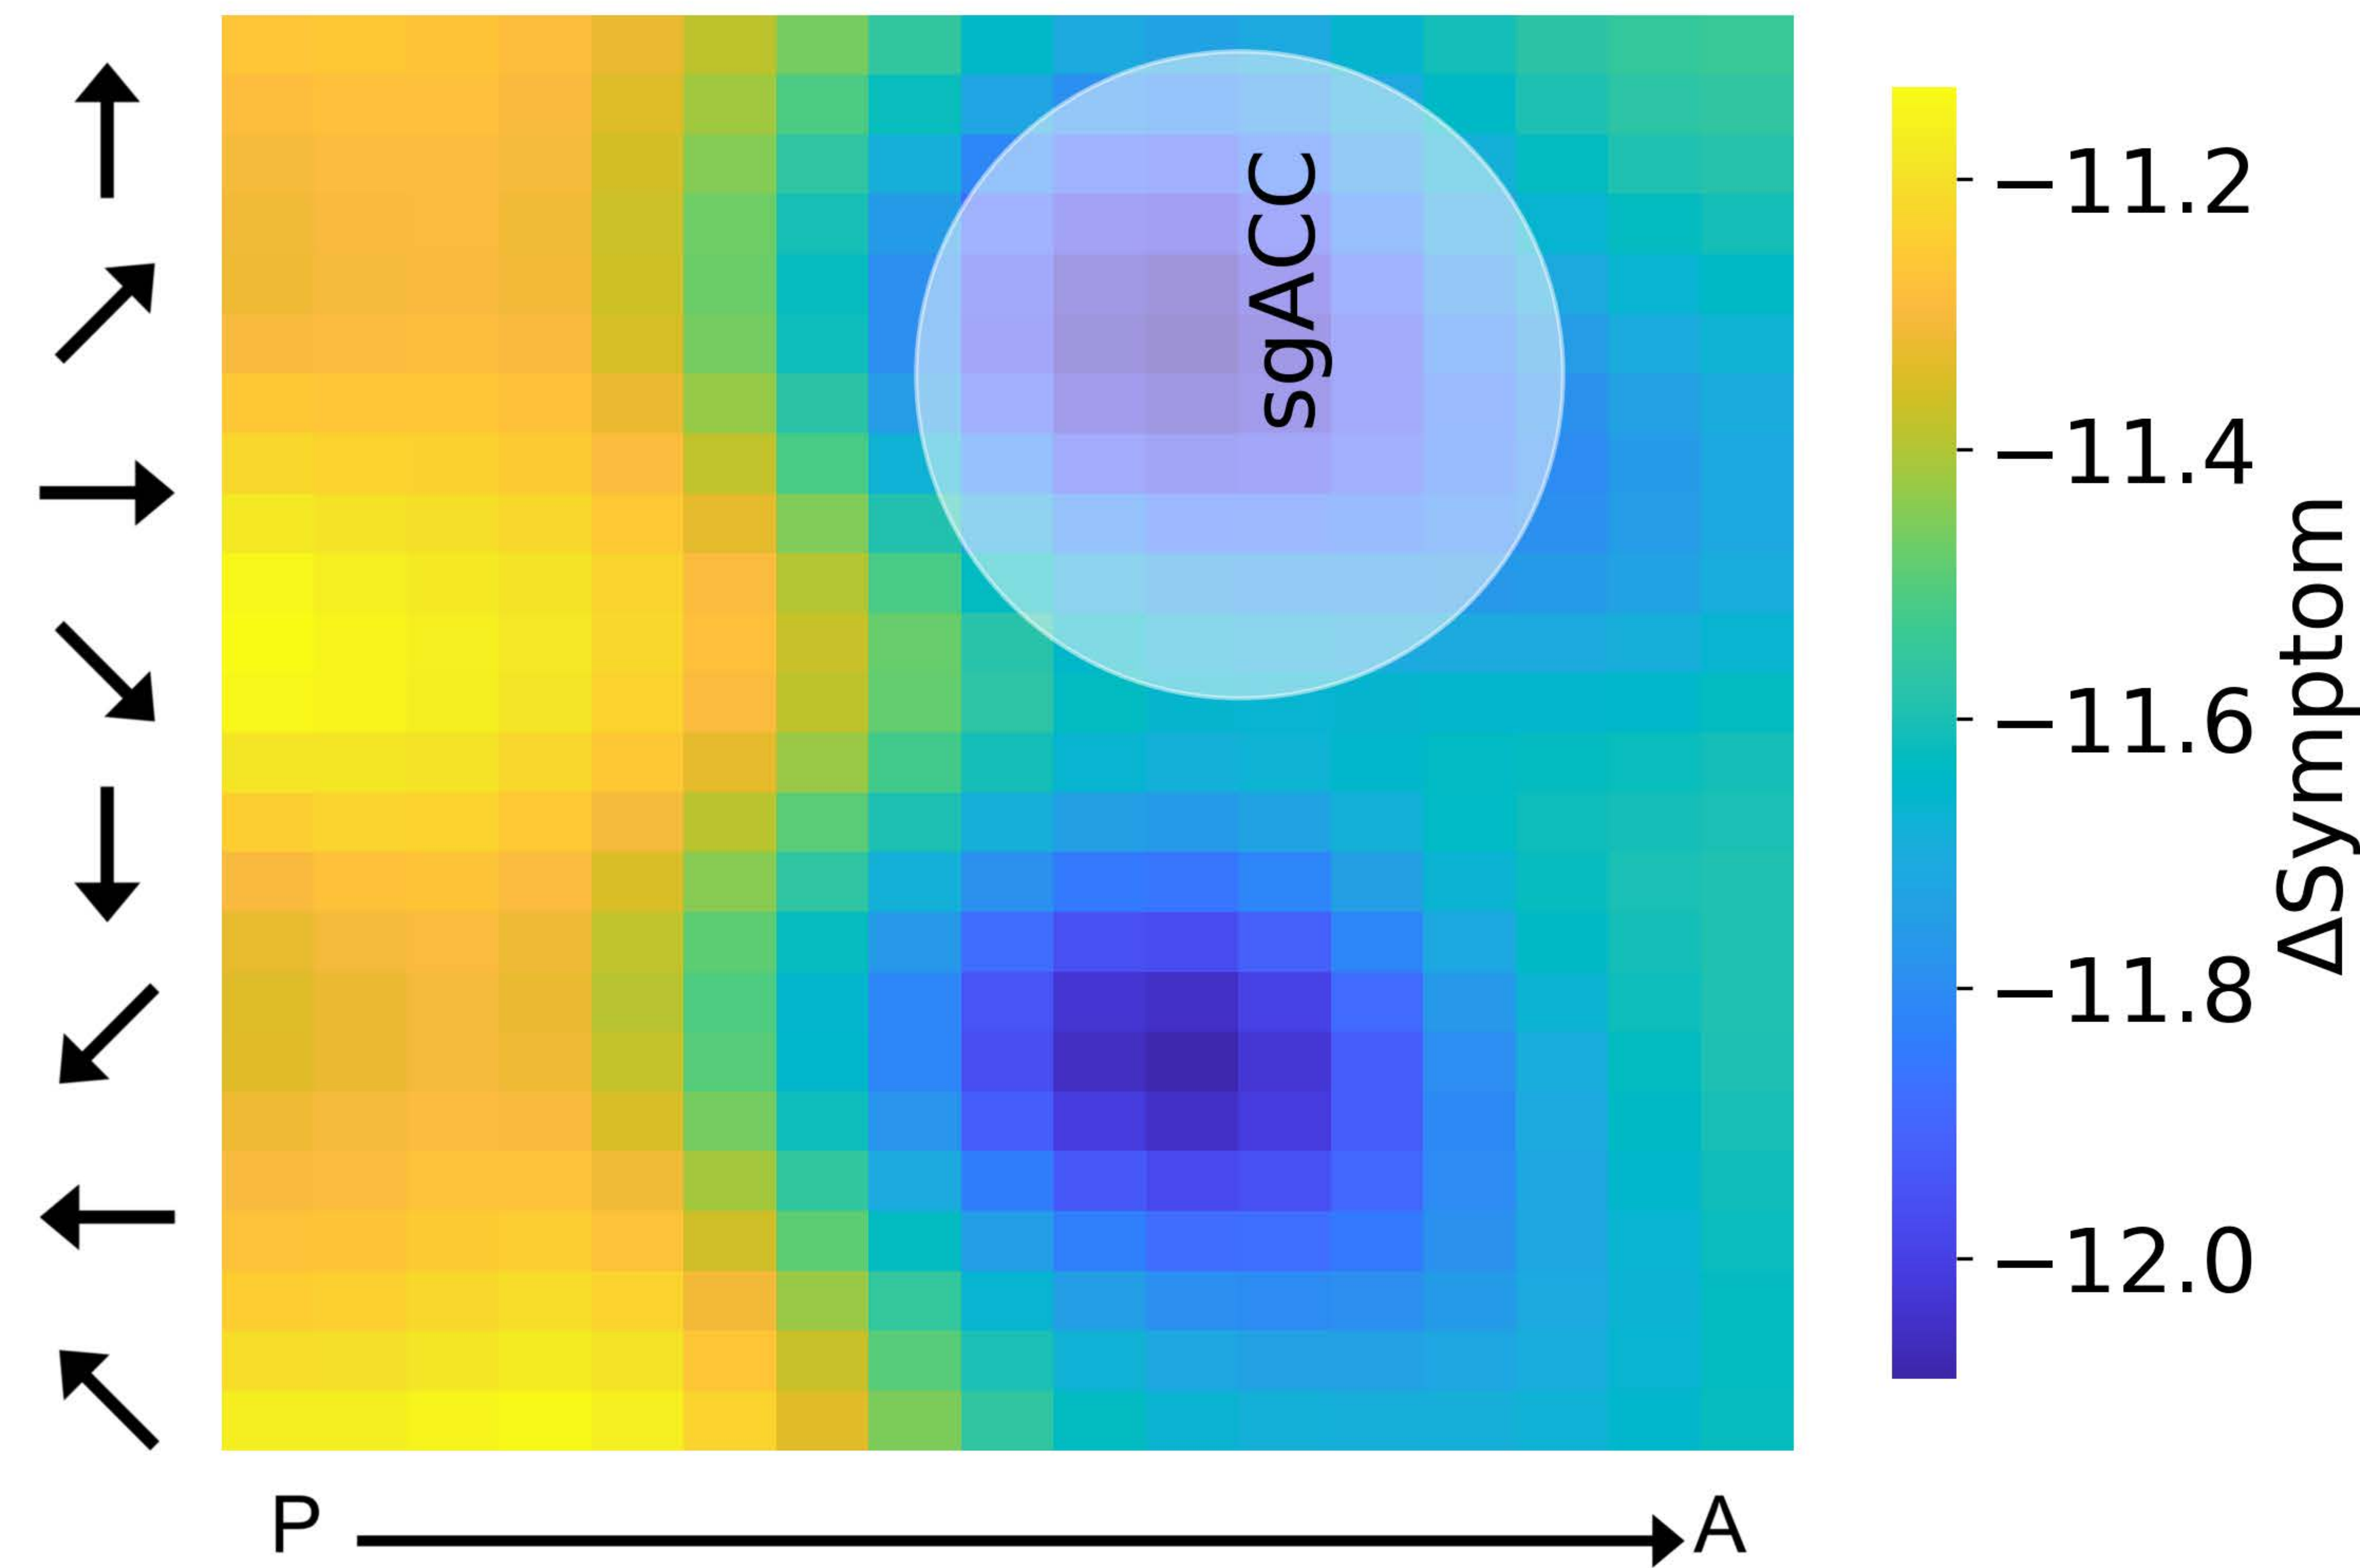



# NDARBT583XH6\_hamd\_left\_dlpfc

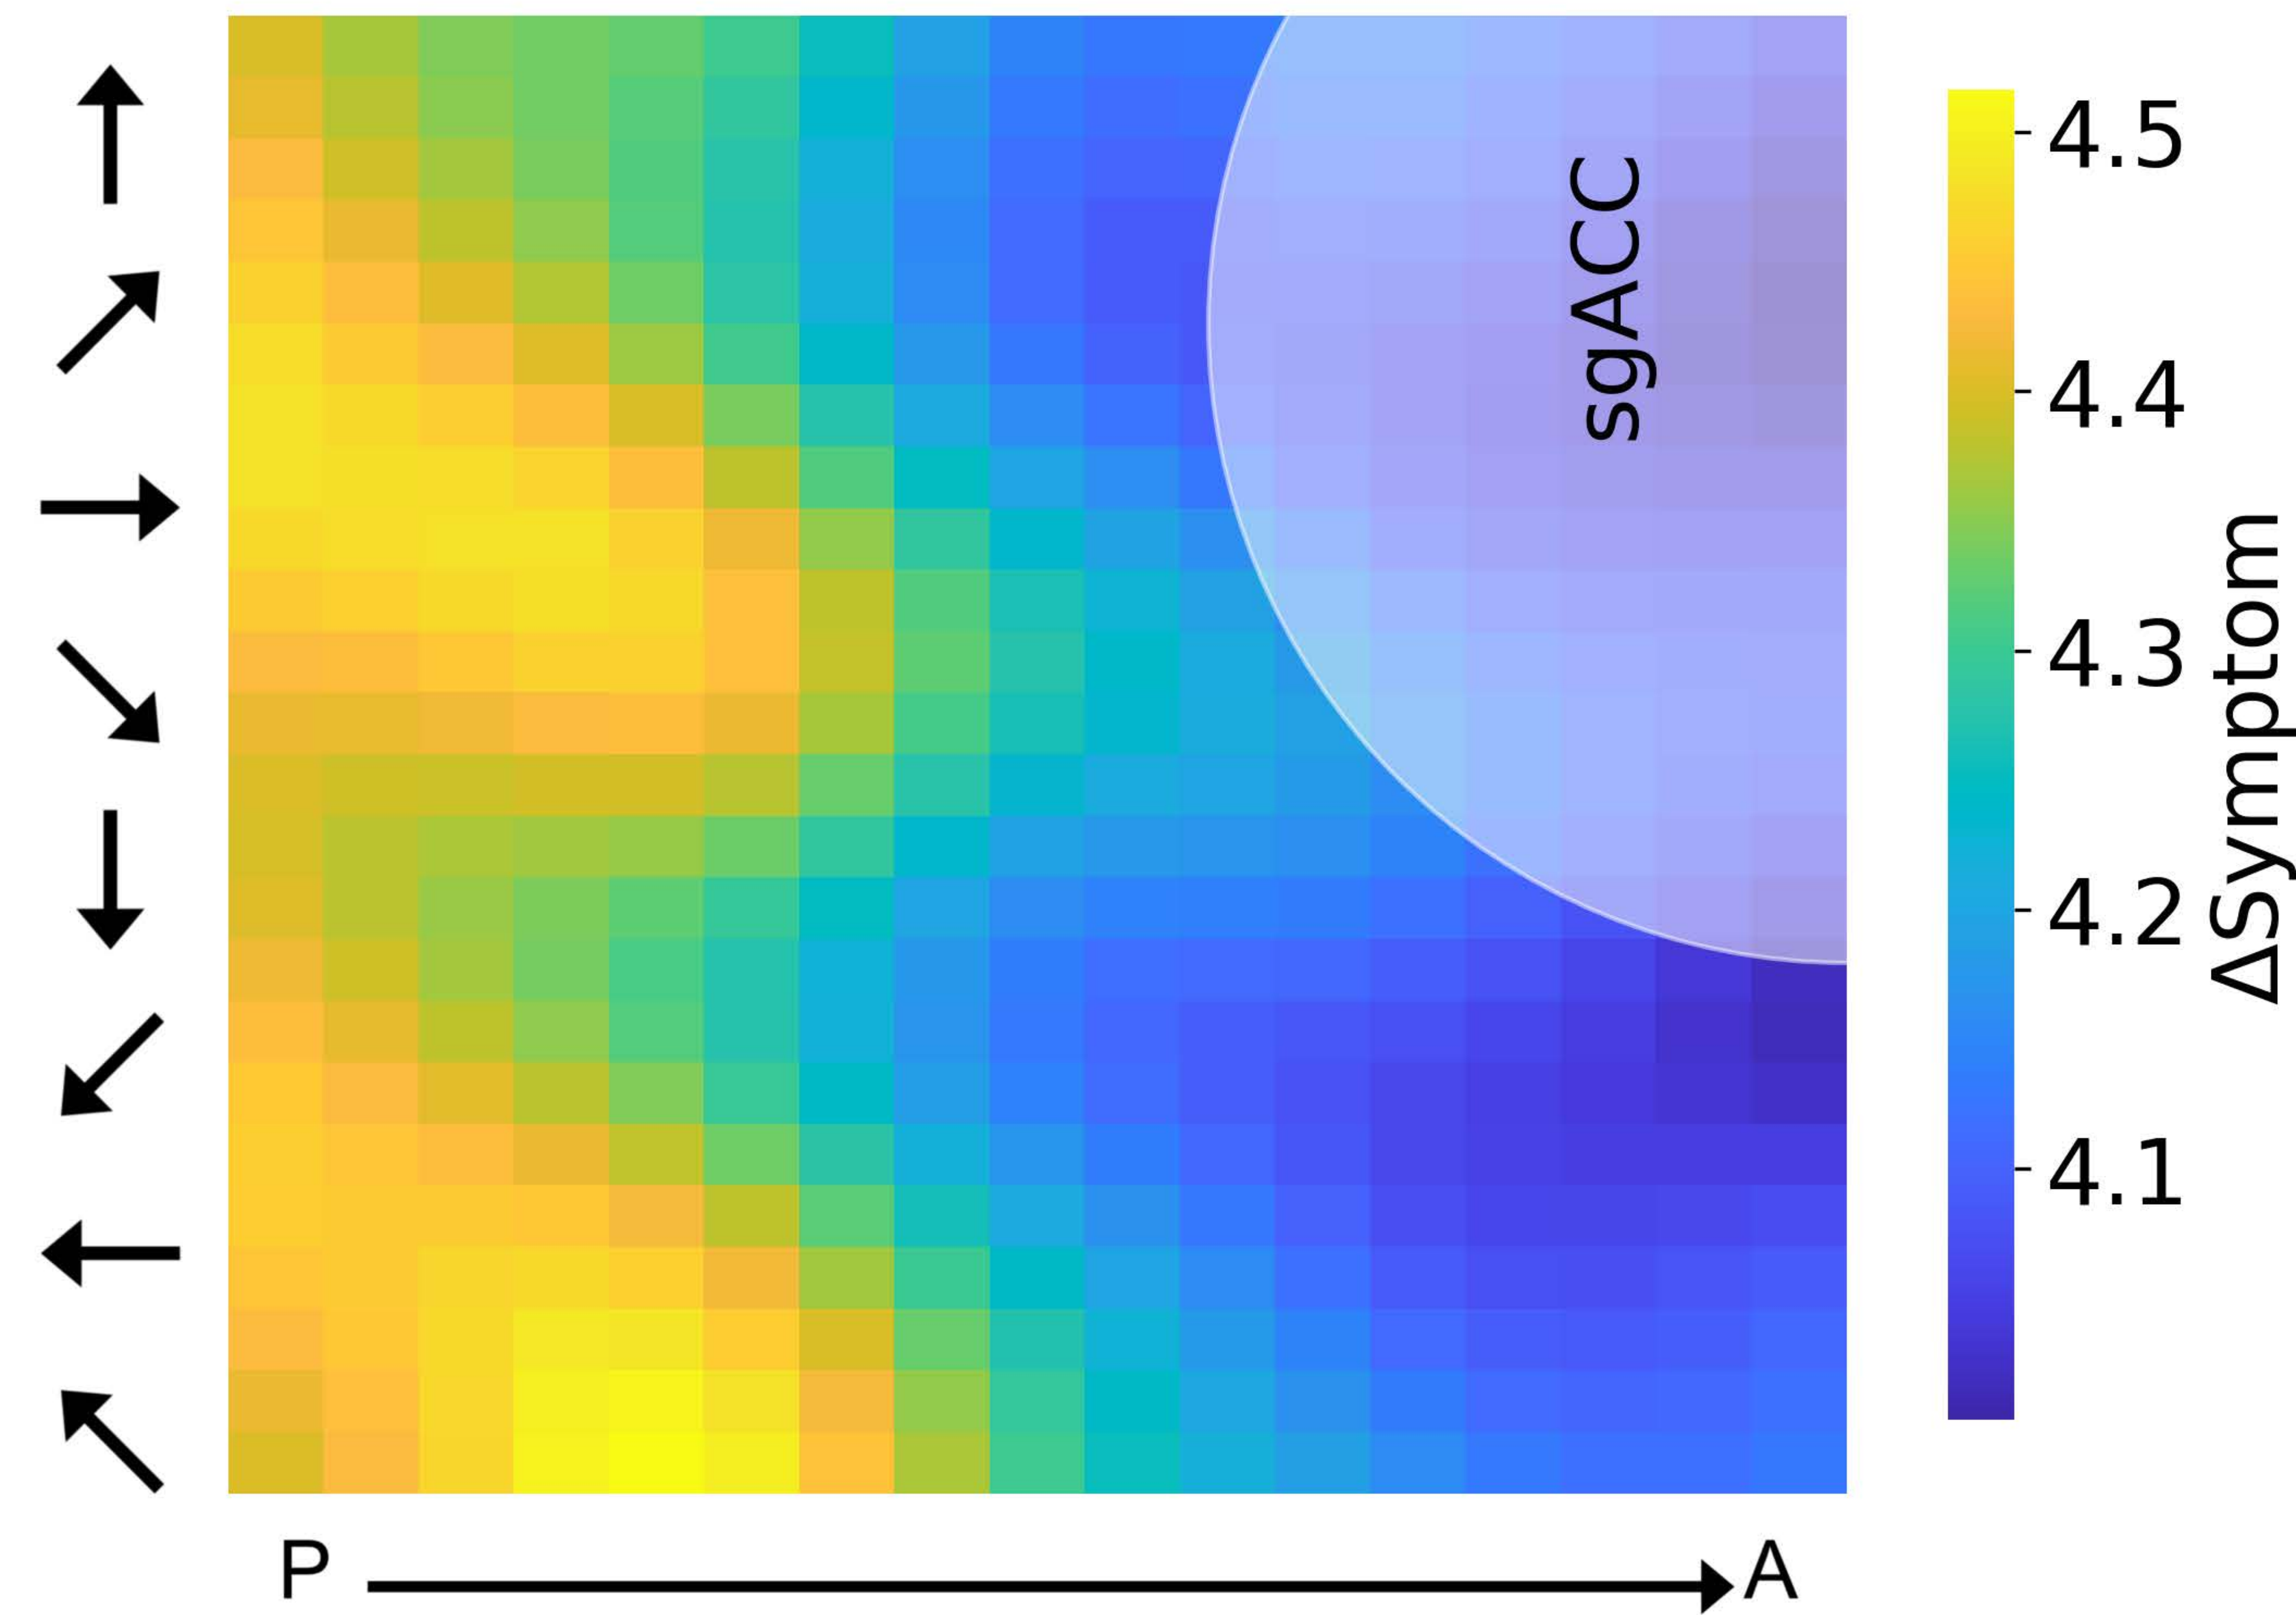



# NDARCG071YN8\_hamd\_left\_dlpfc

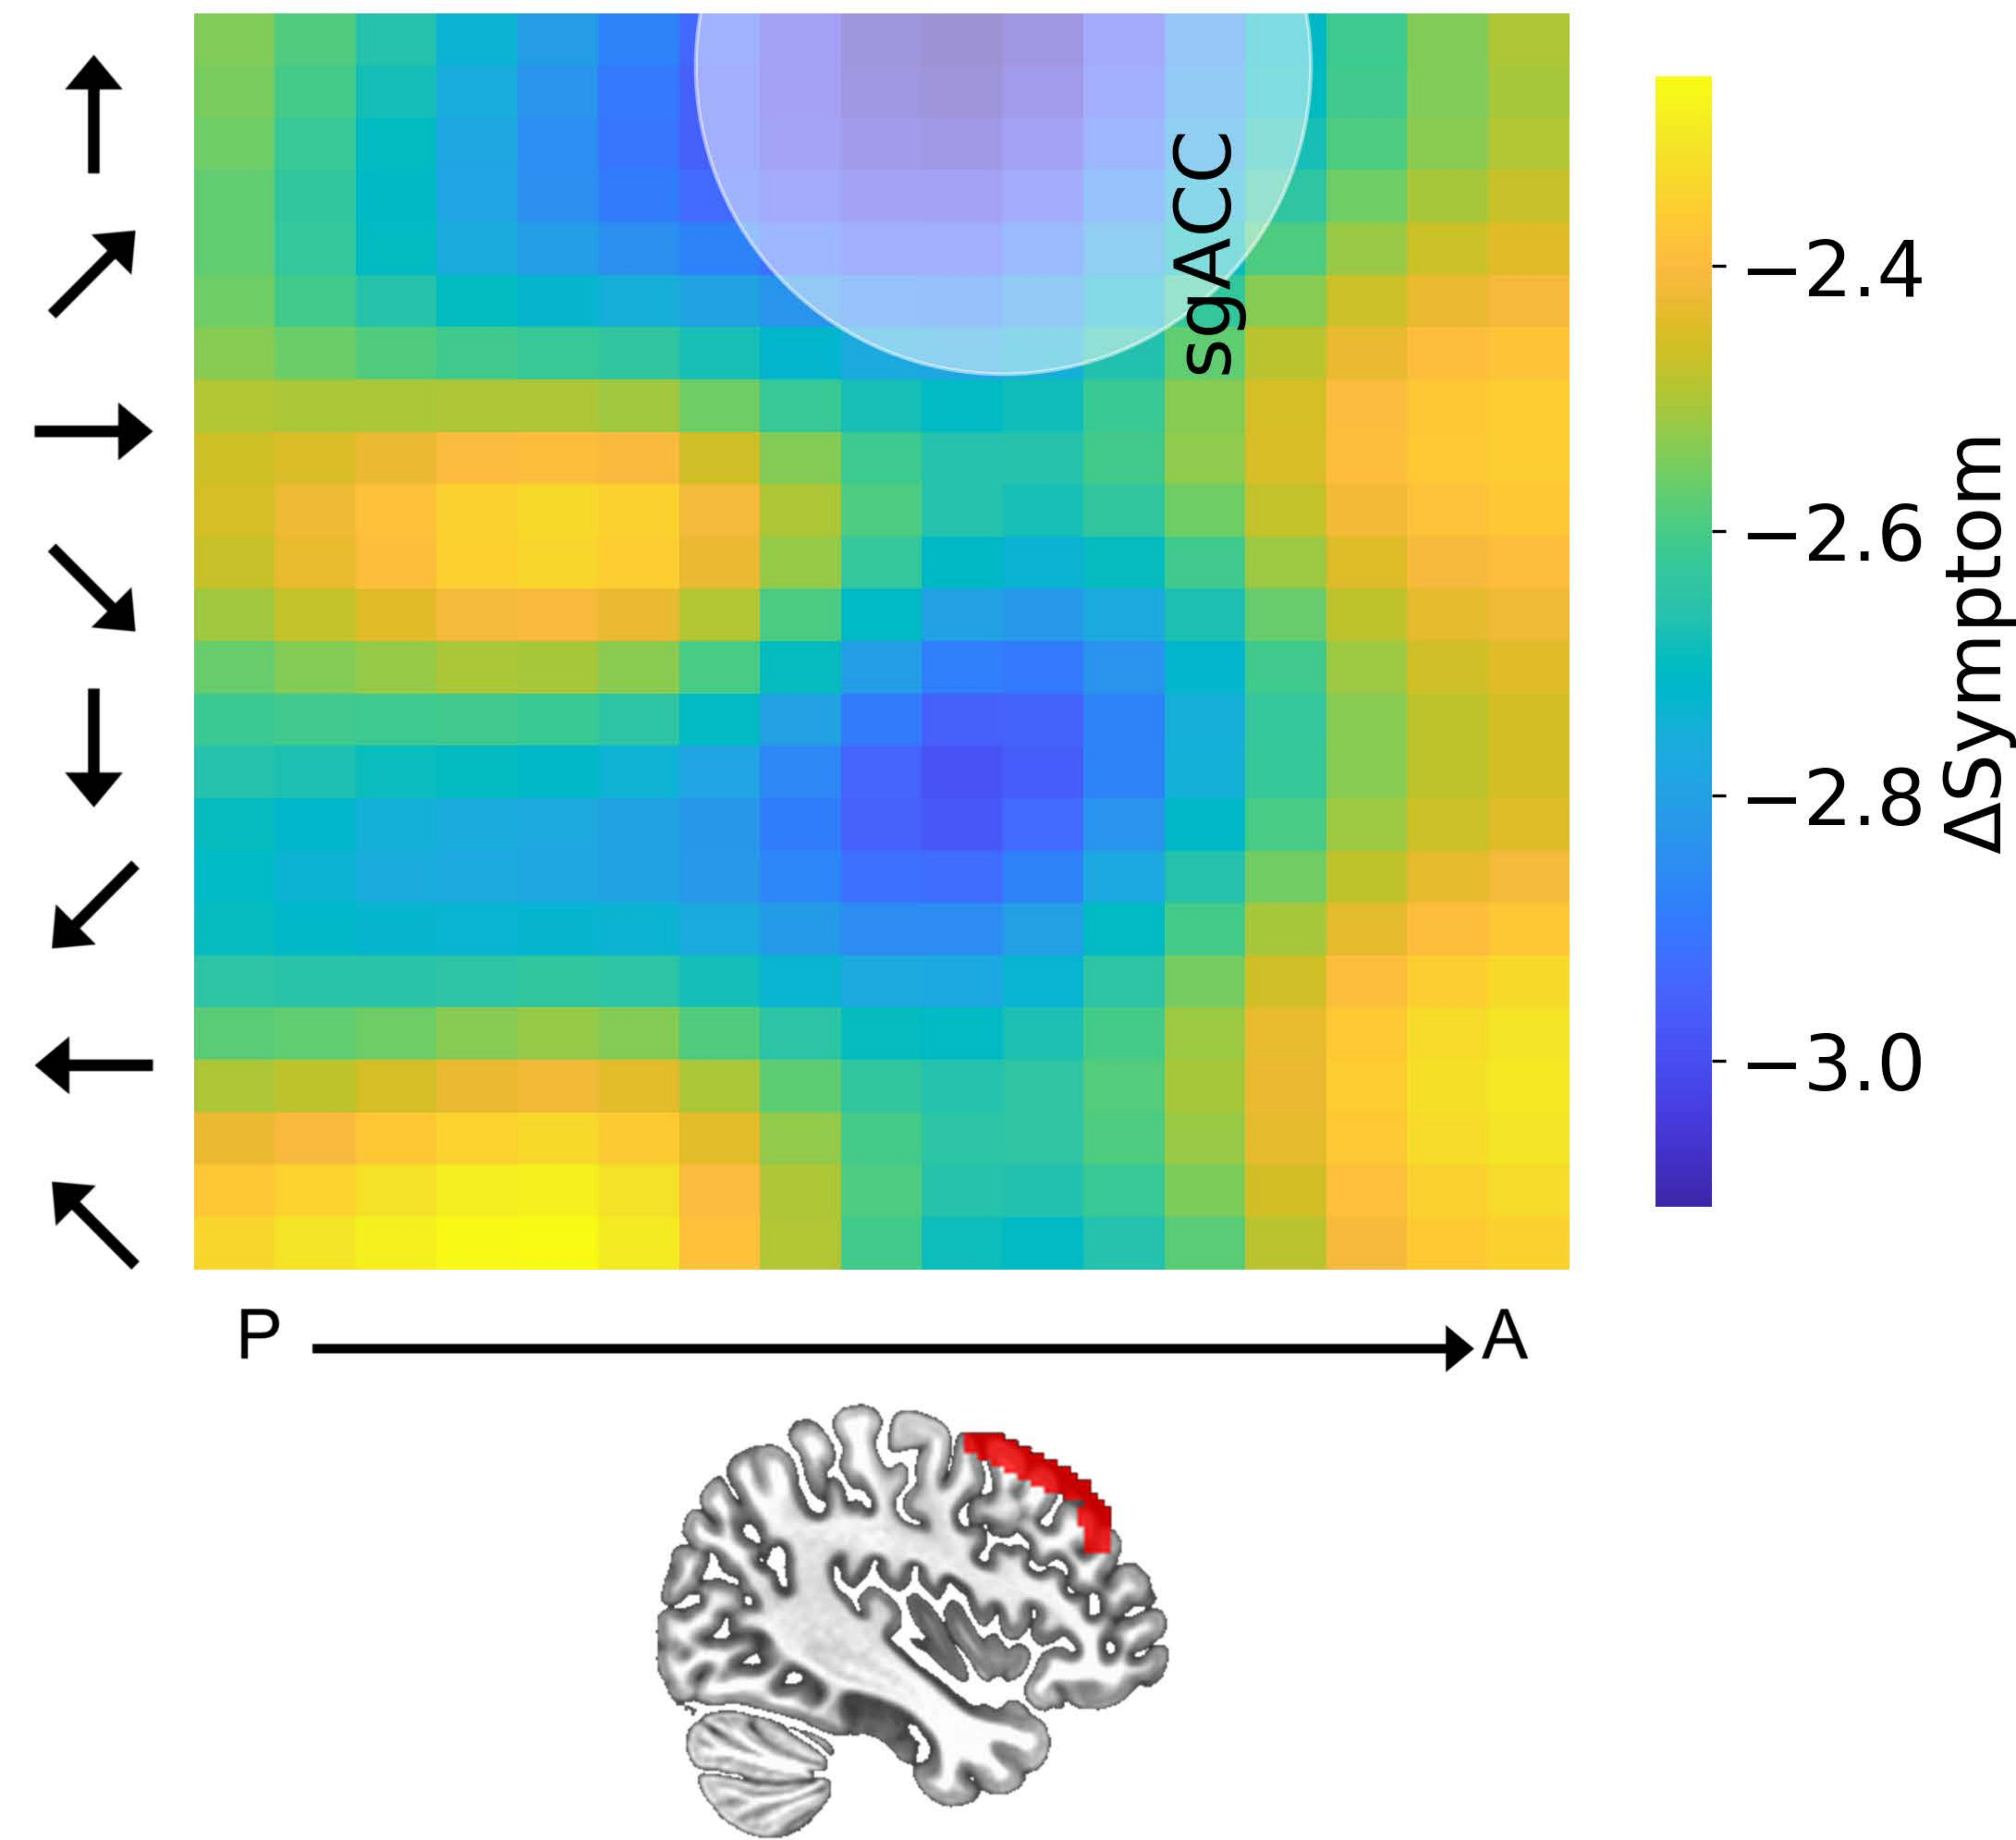



# INDARCG271VGC\_hamd\_left\_dlpfc

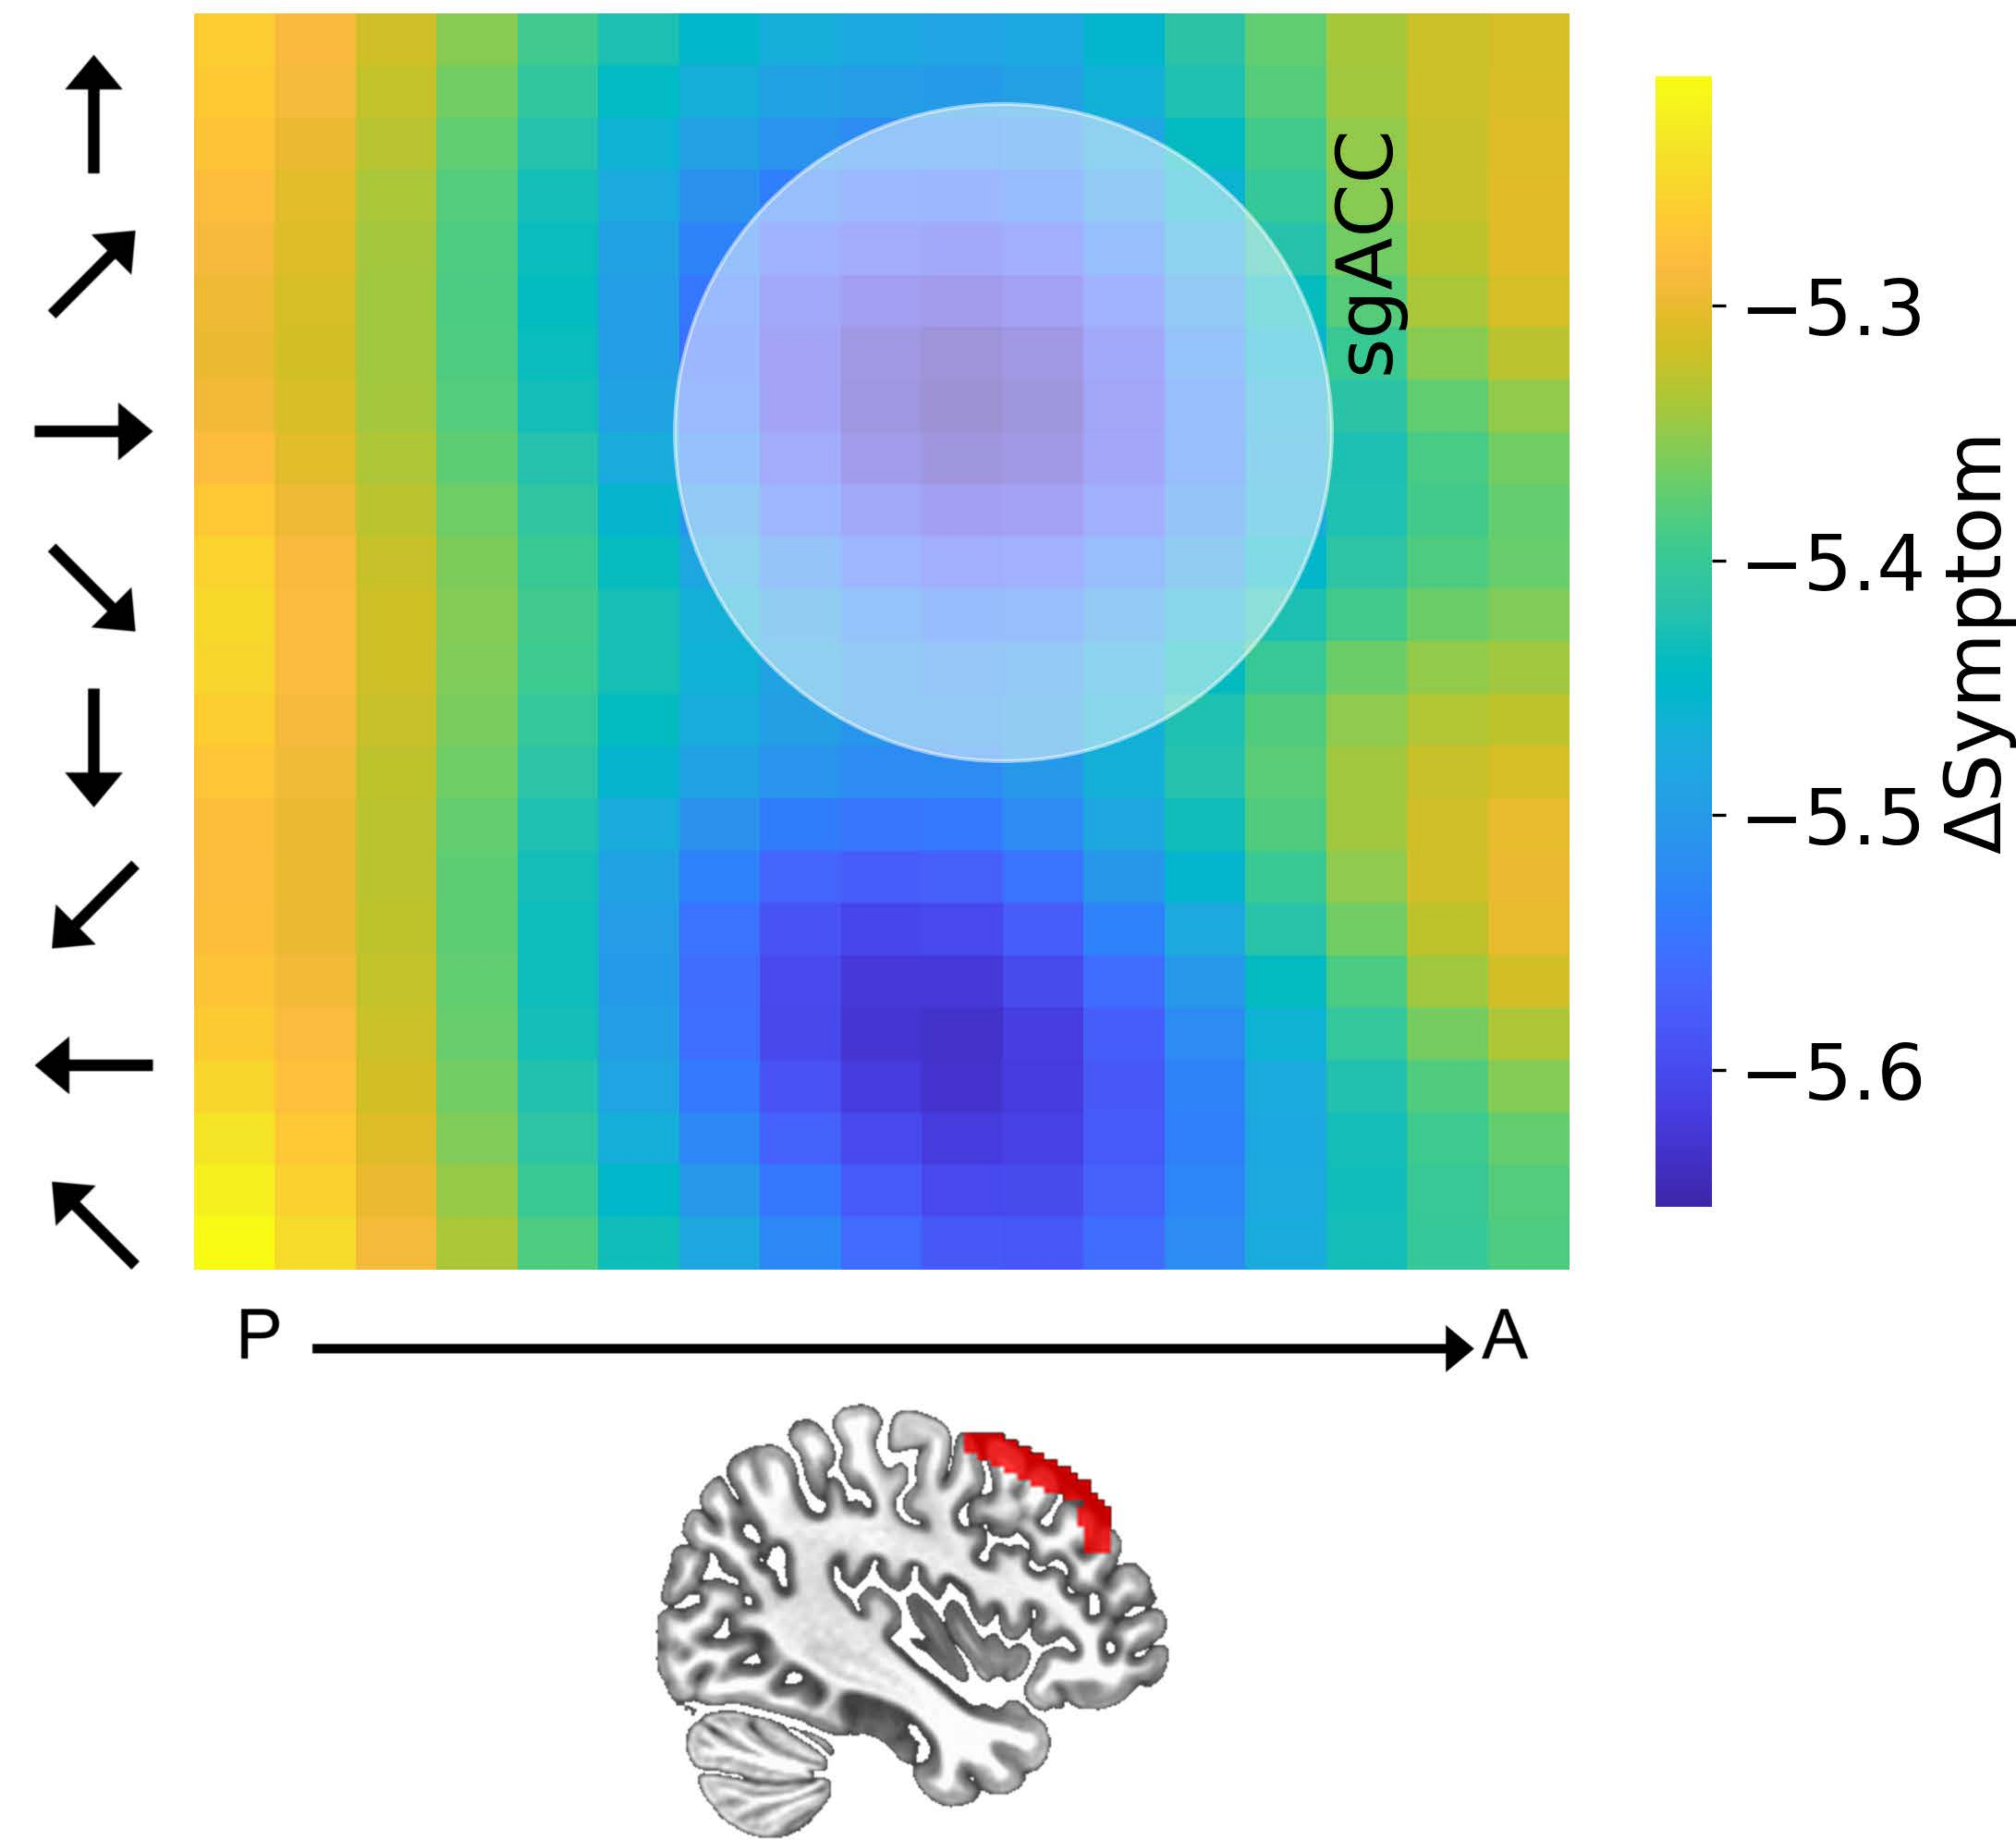



# NDARCM769WZL\_hamd\_left\_dlpfc

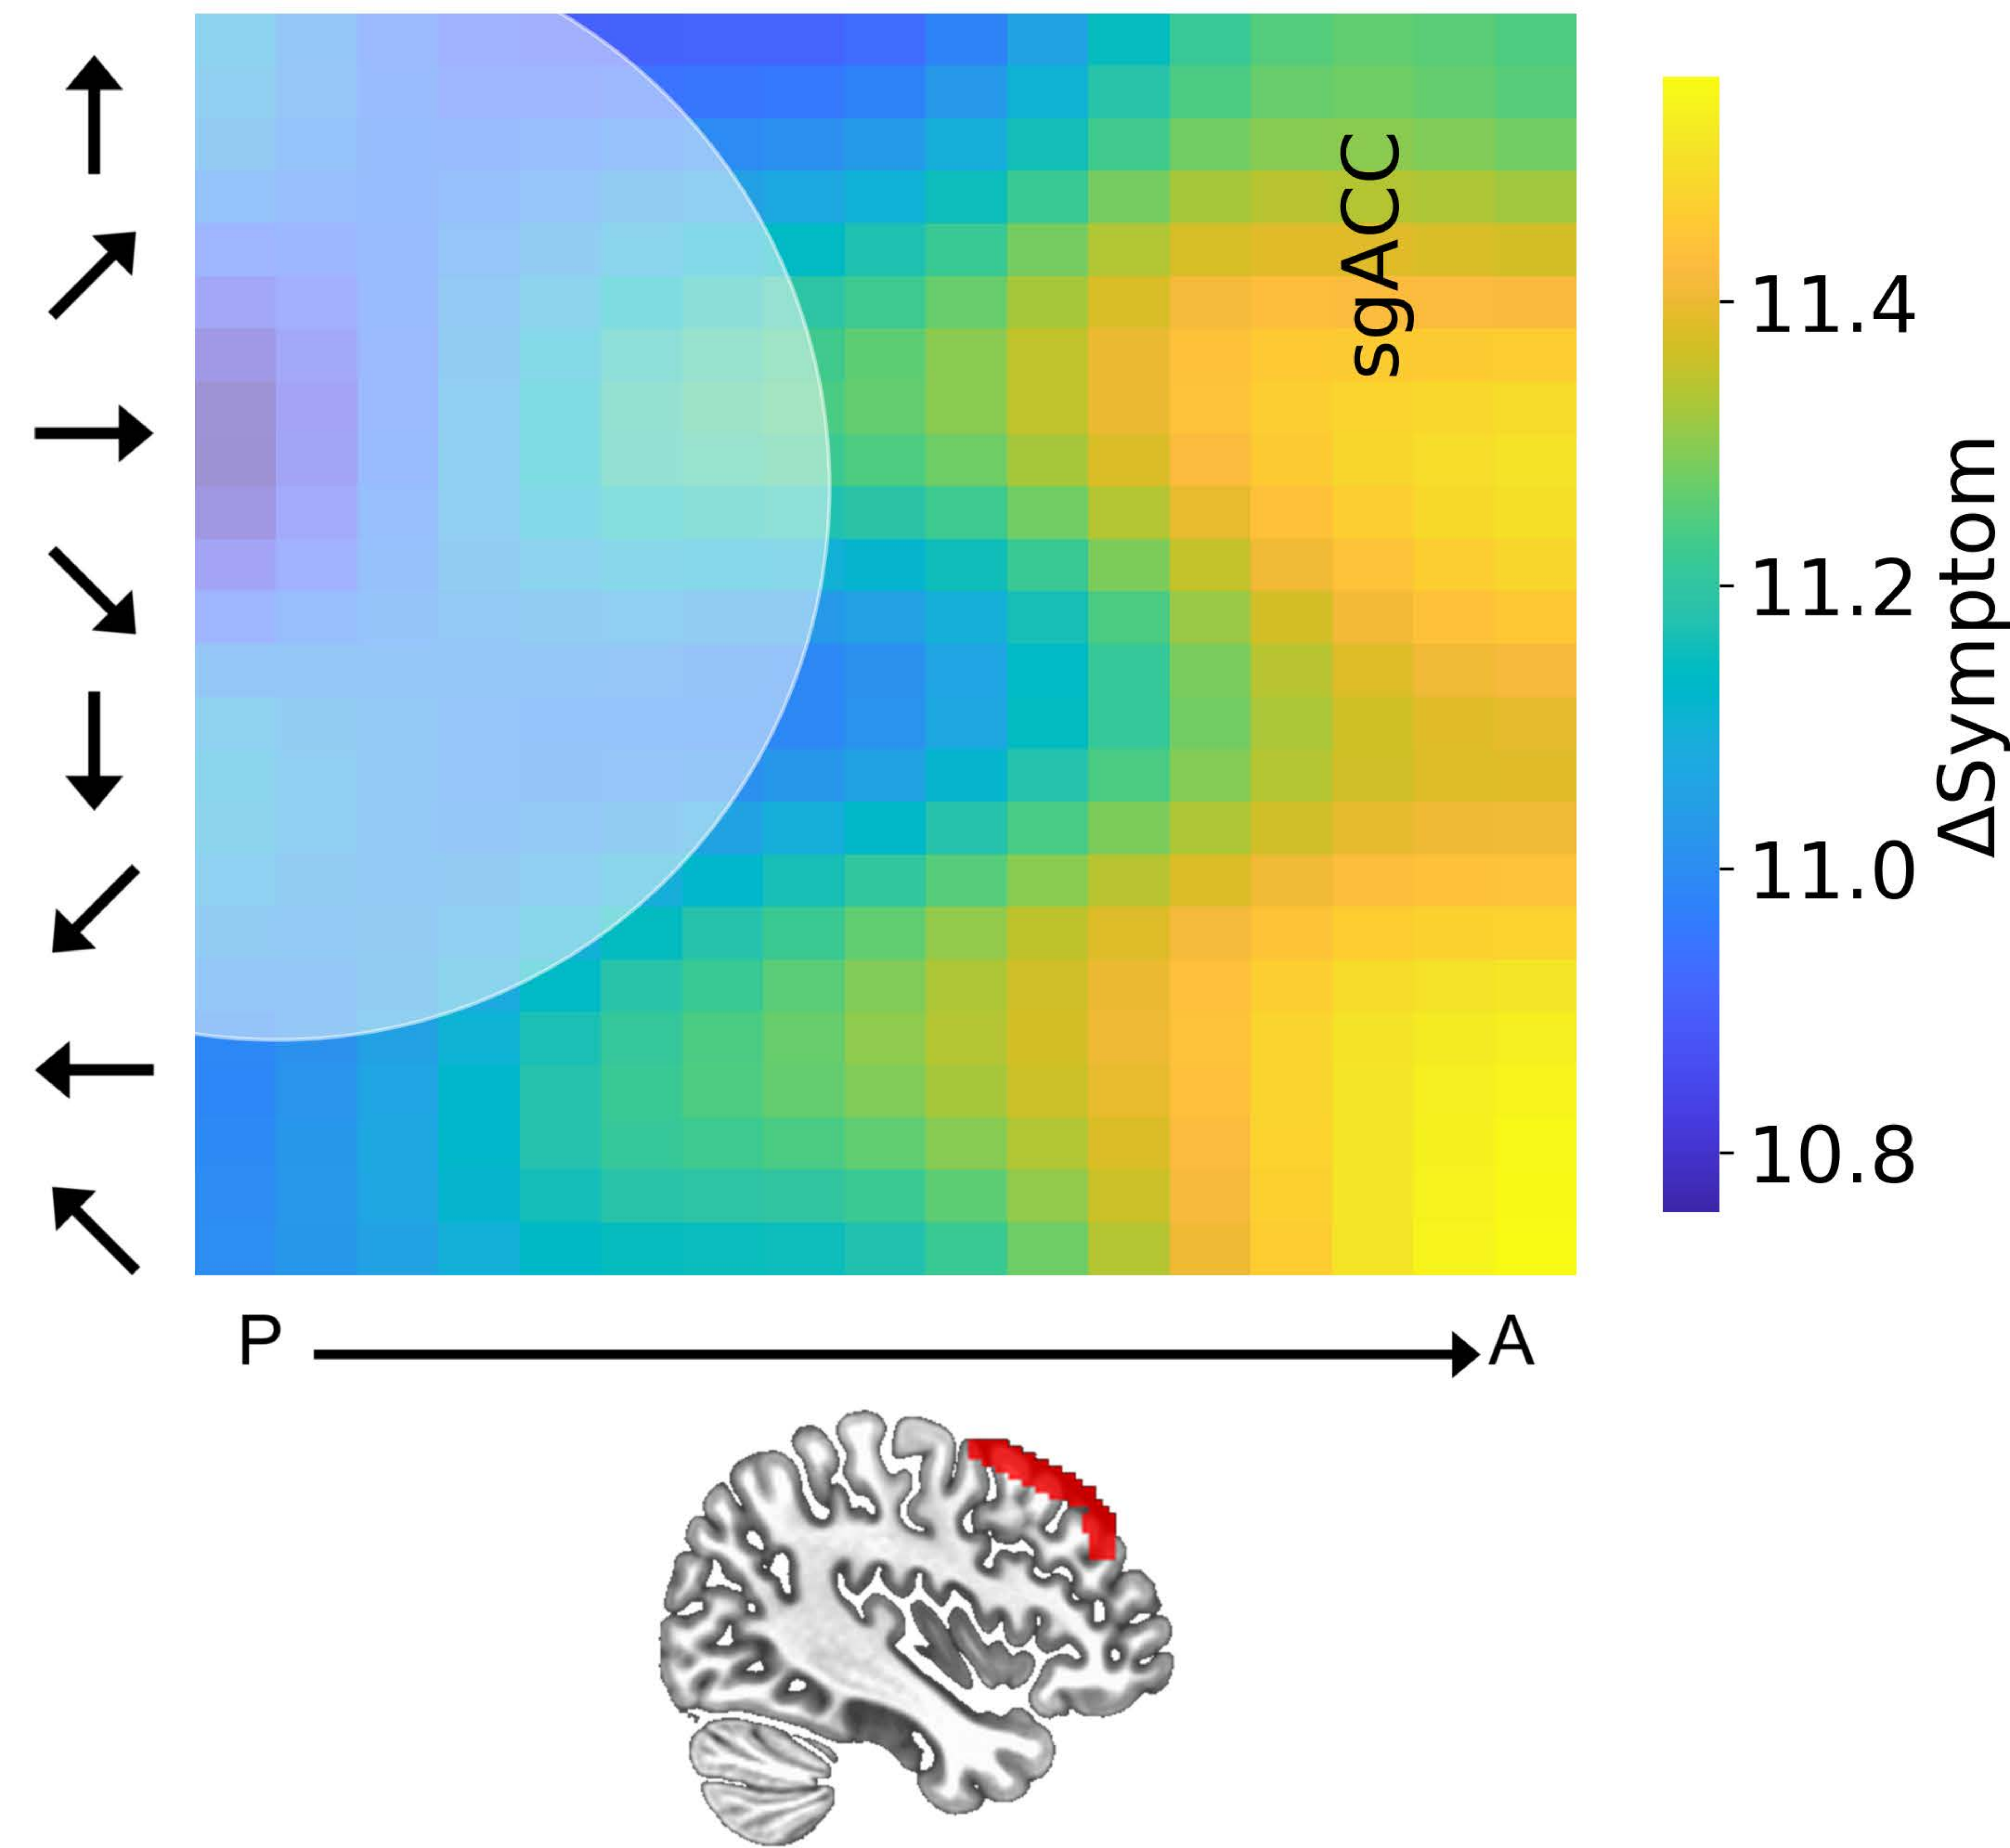



# INDARDL291XT0\_hamd\_left\_dlpfc

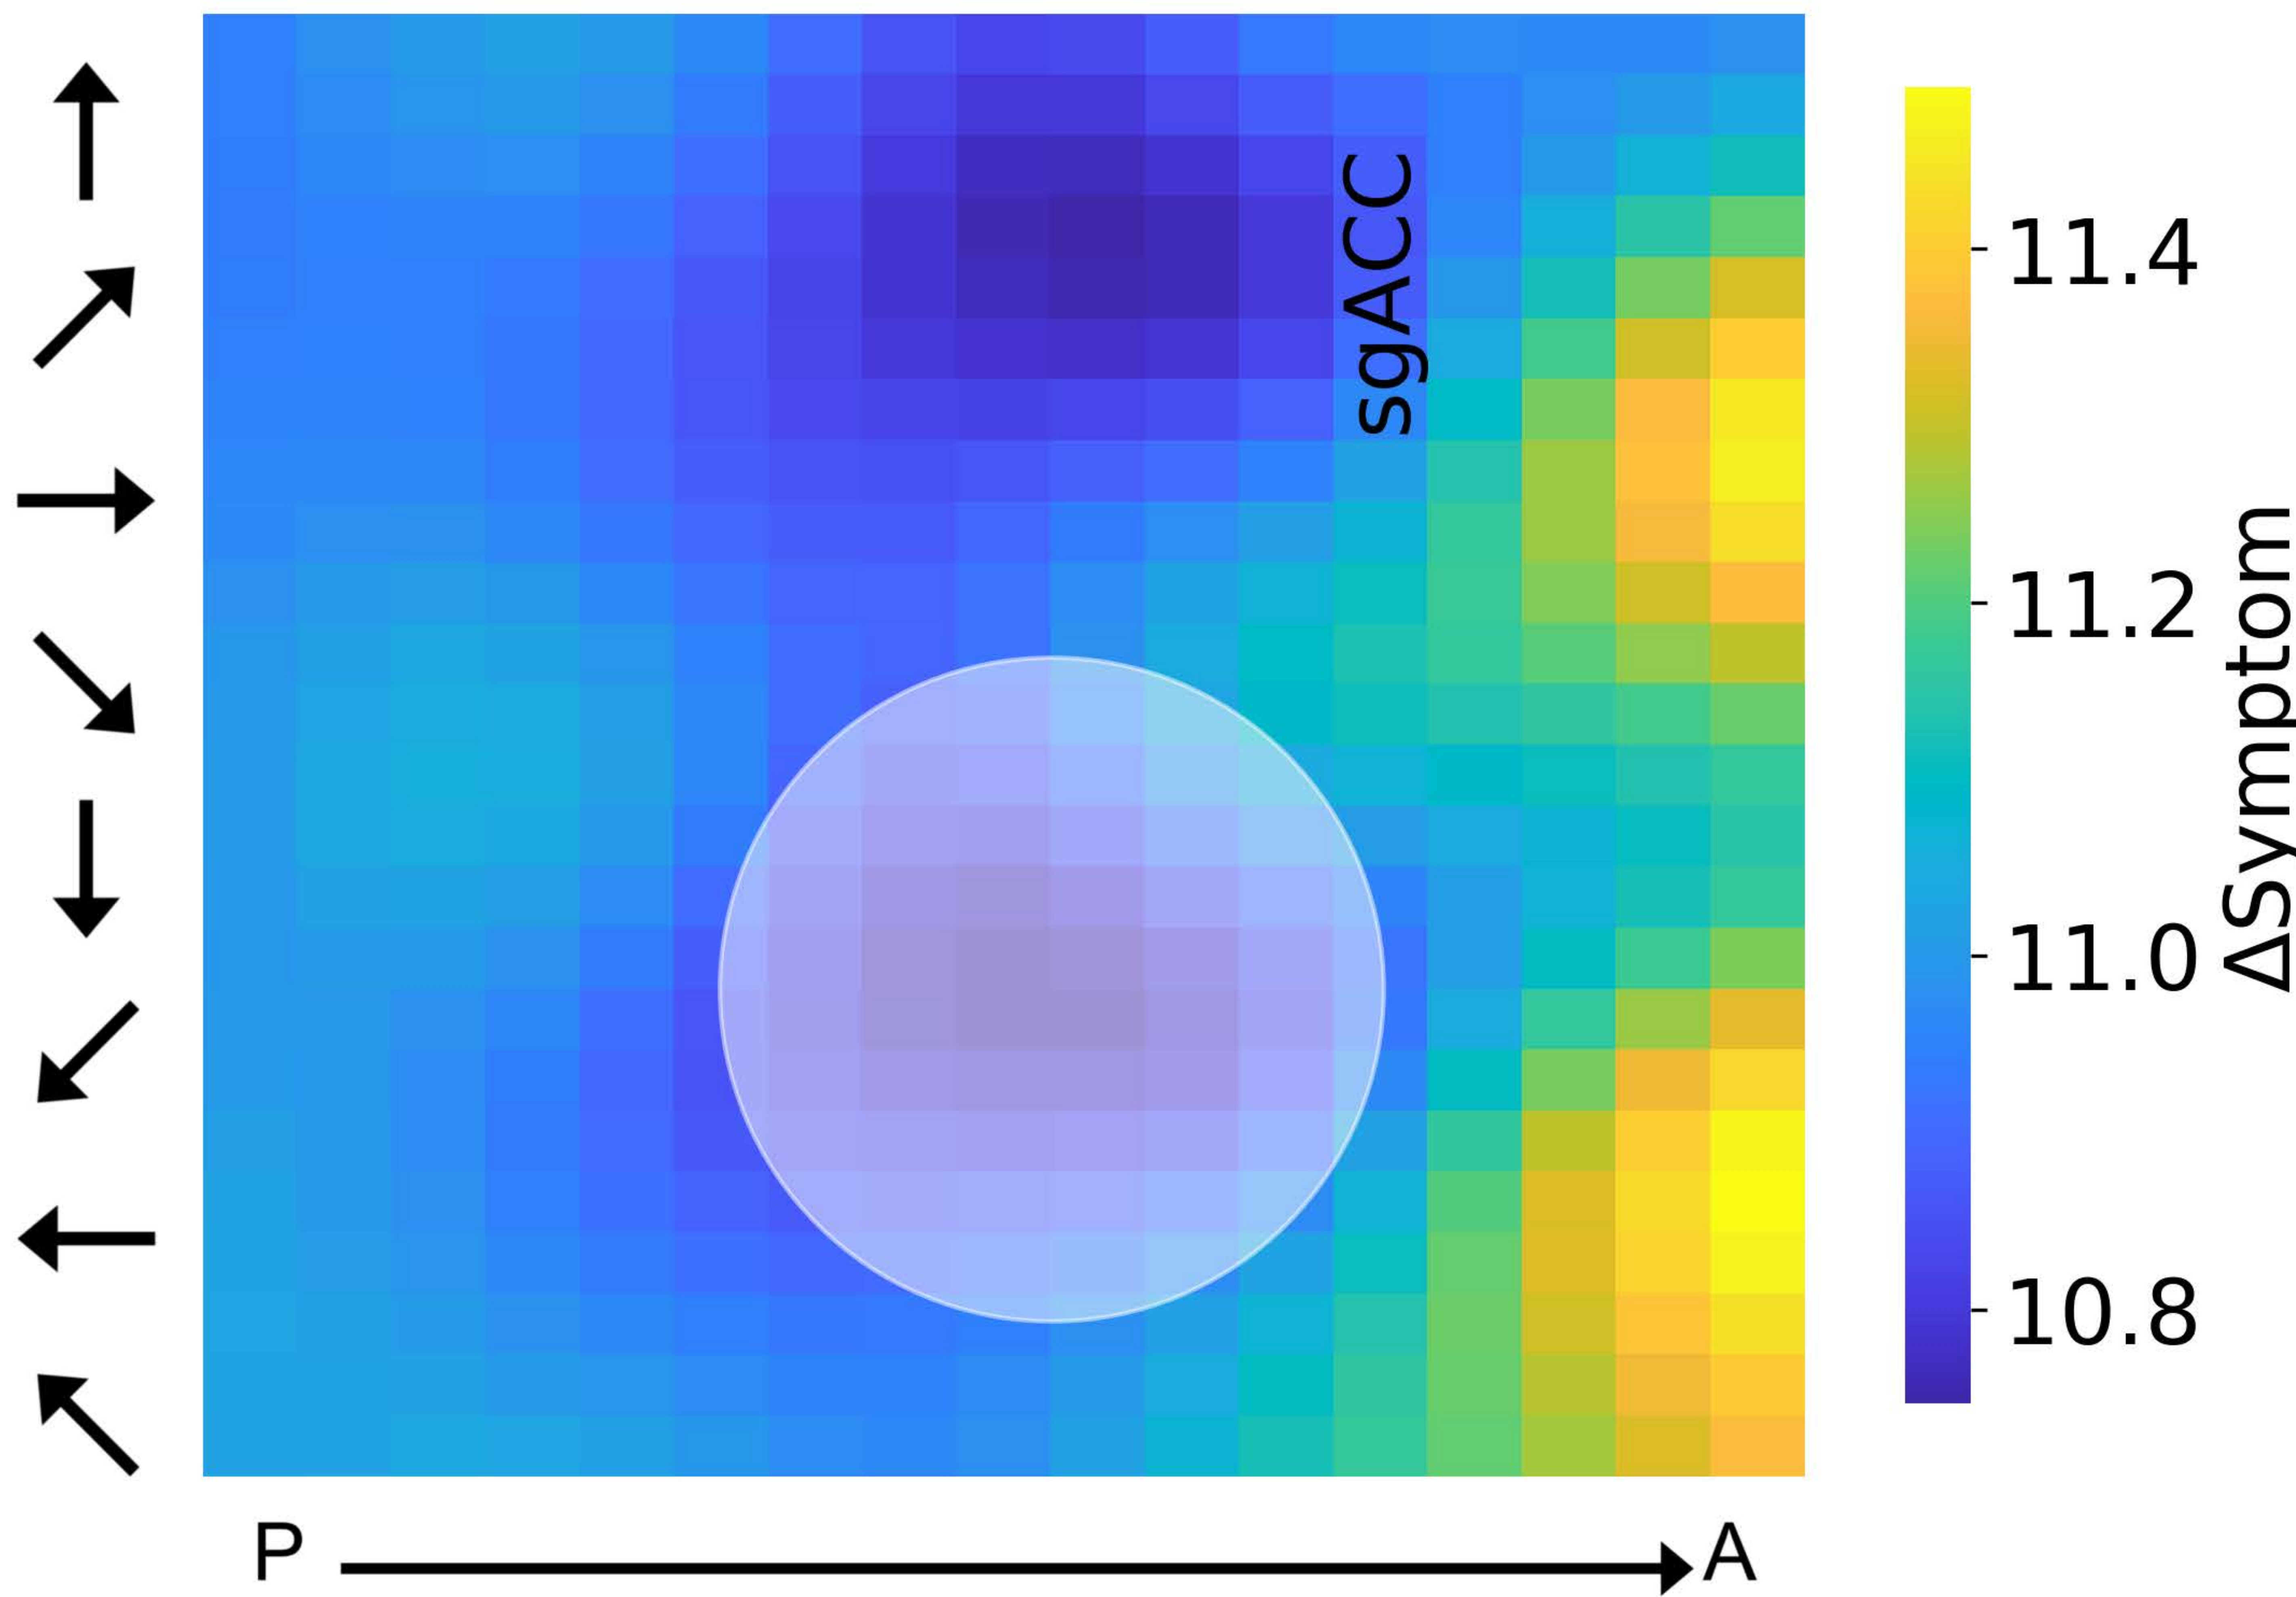

P  A

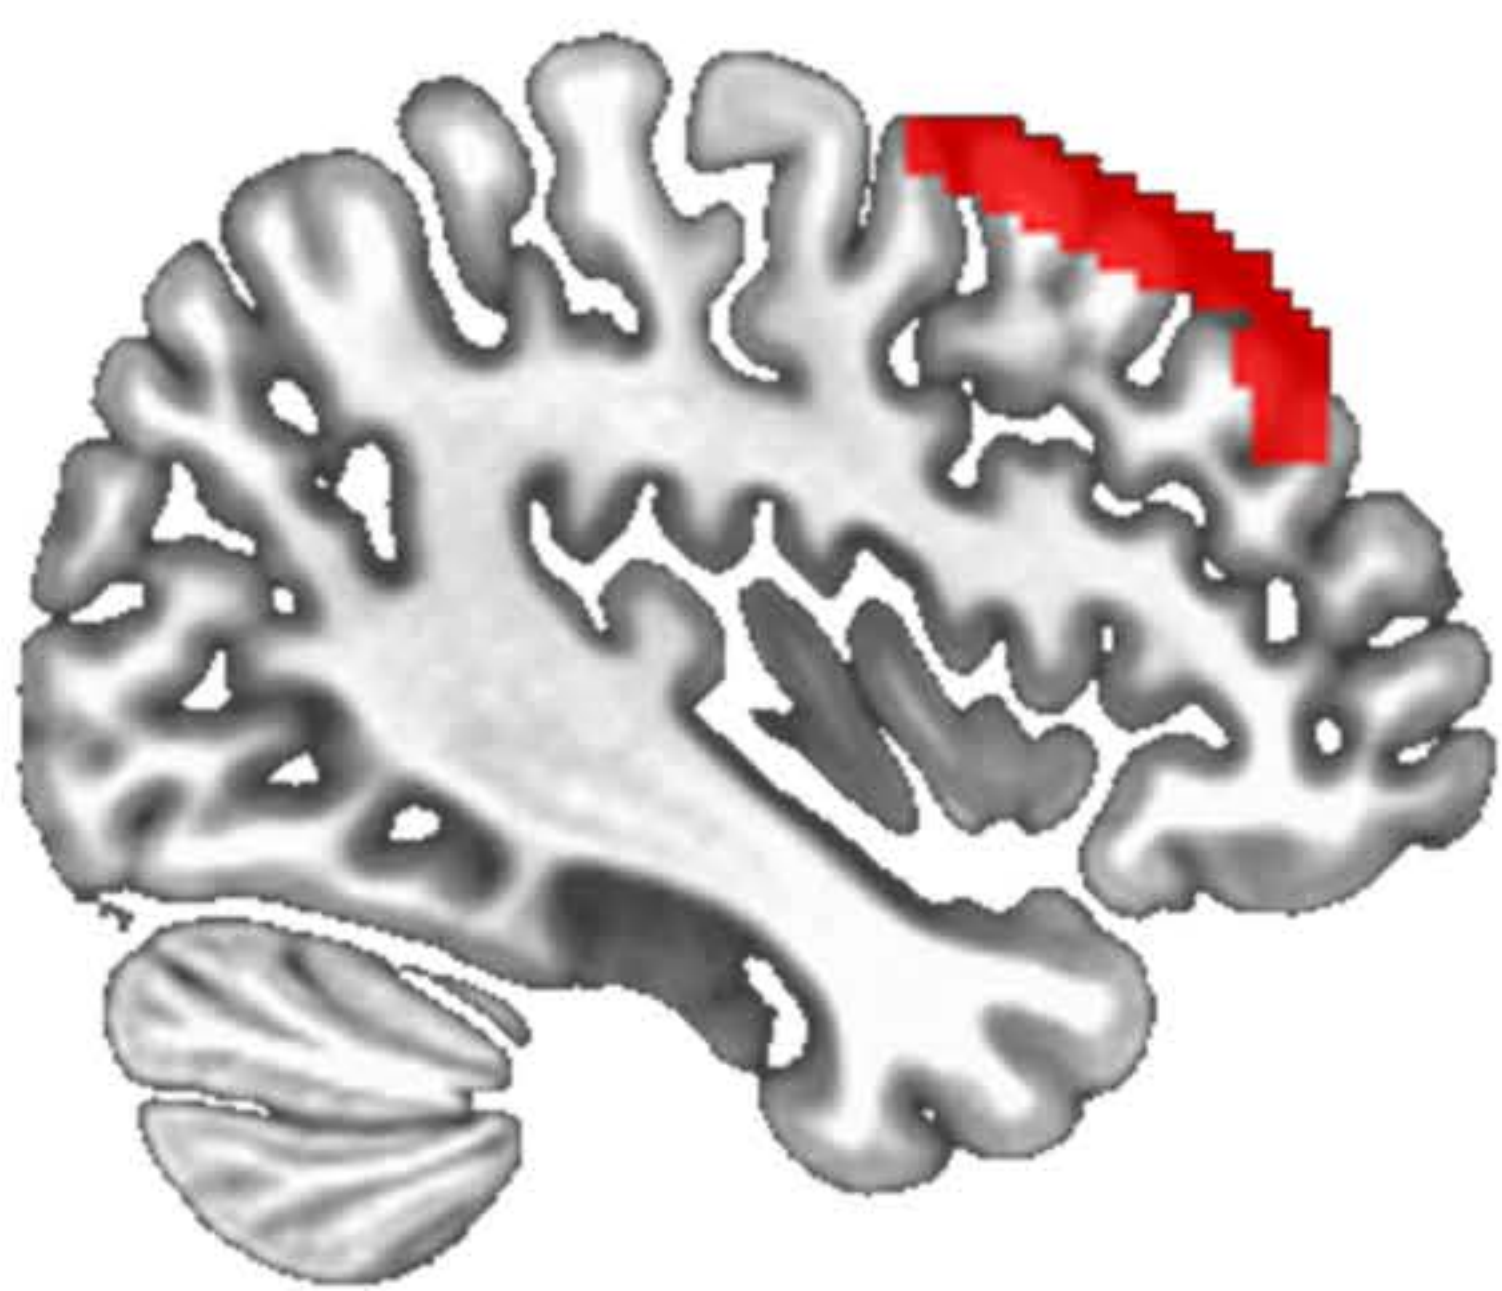



# INDARDL667VMW\_hamd\_left\_dlpfc

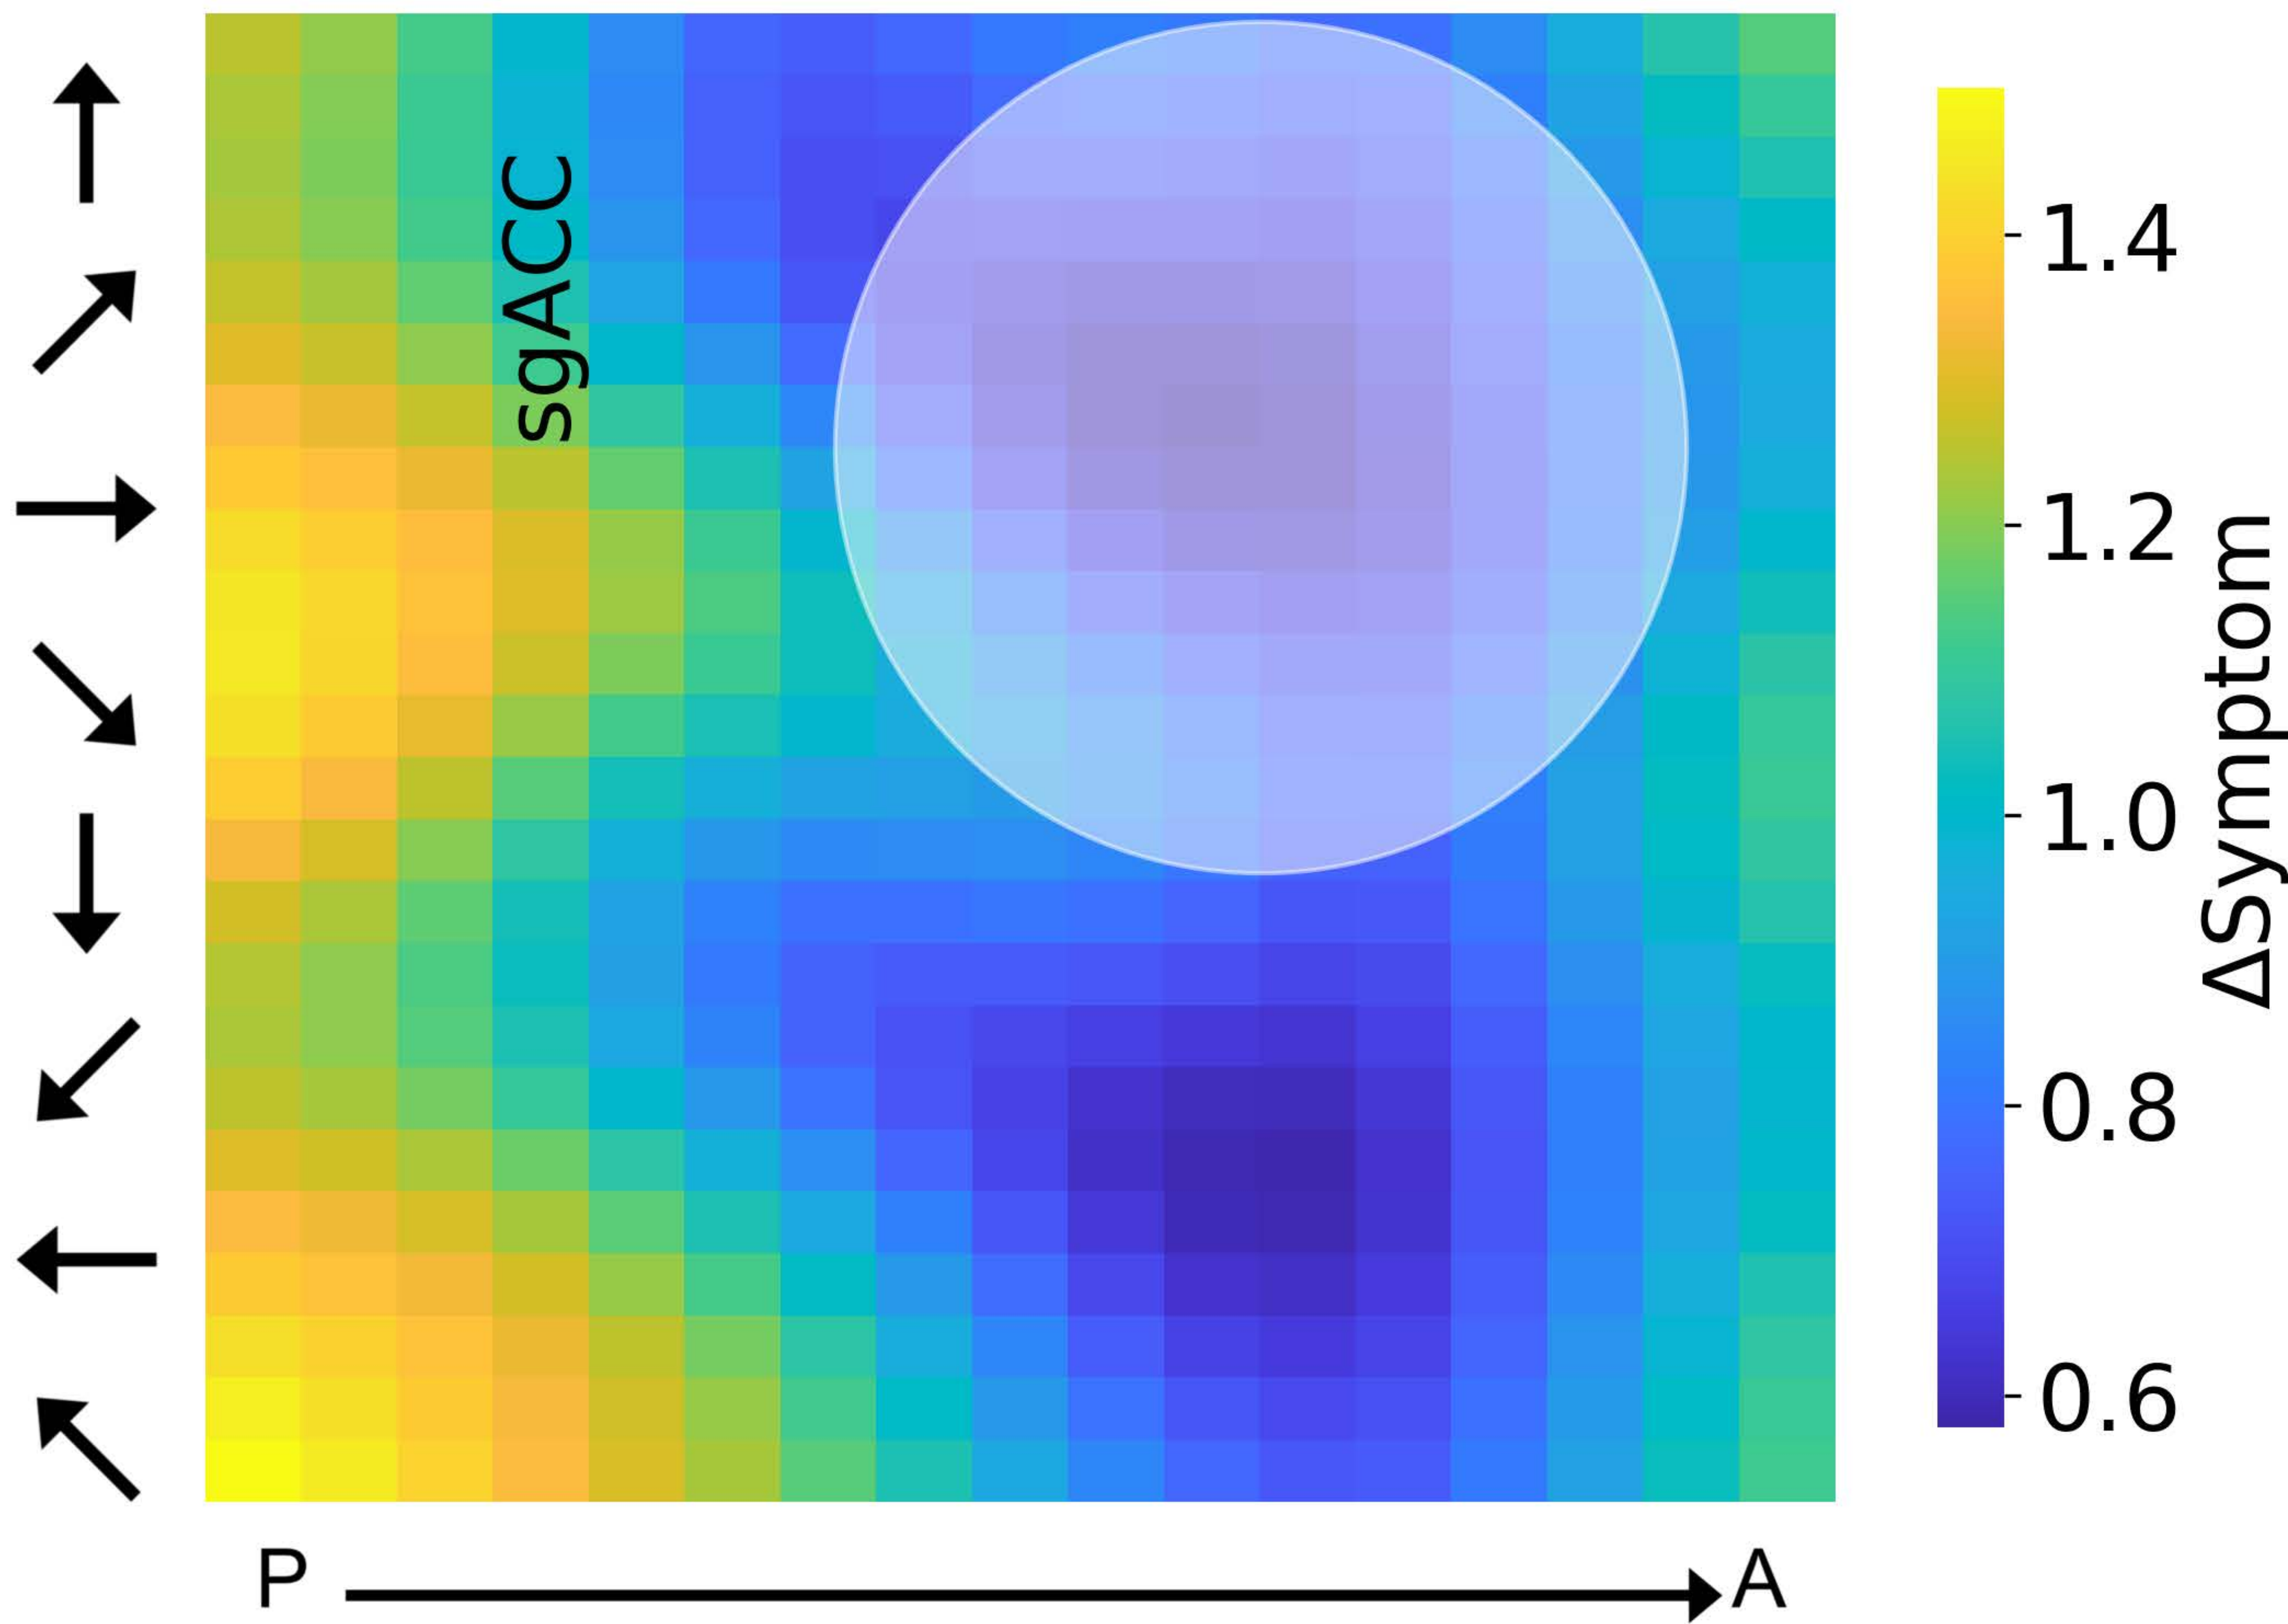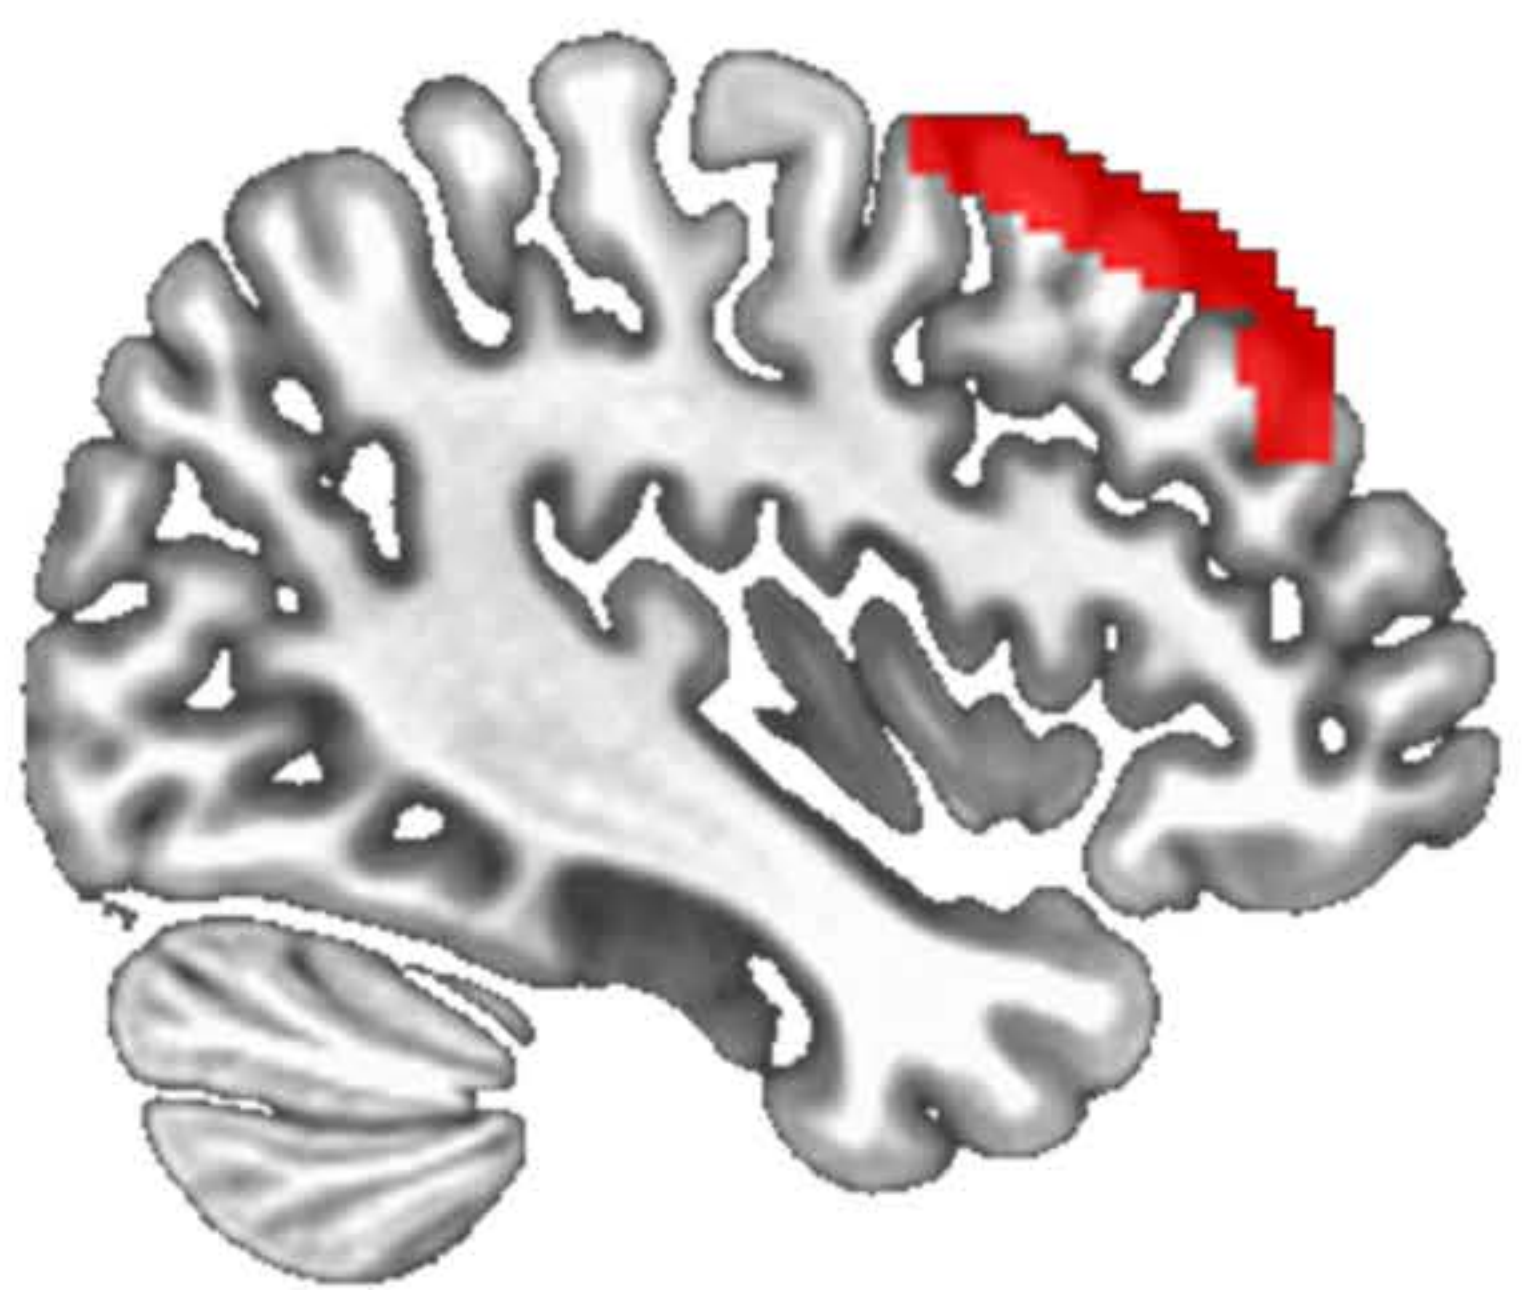



# INDARDR017YX2\_hamd\_left\_dlpfc

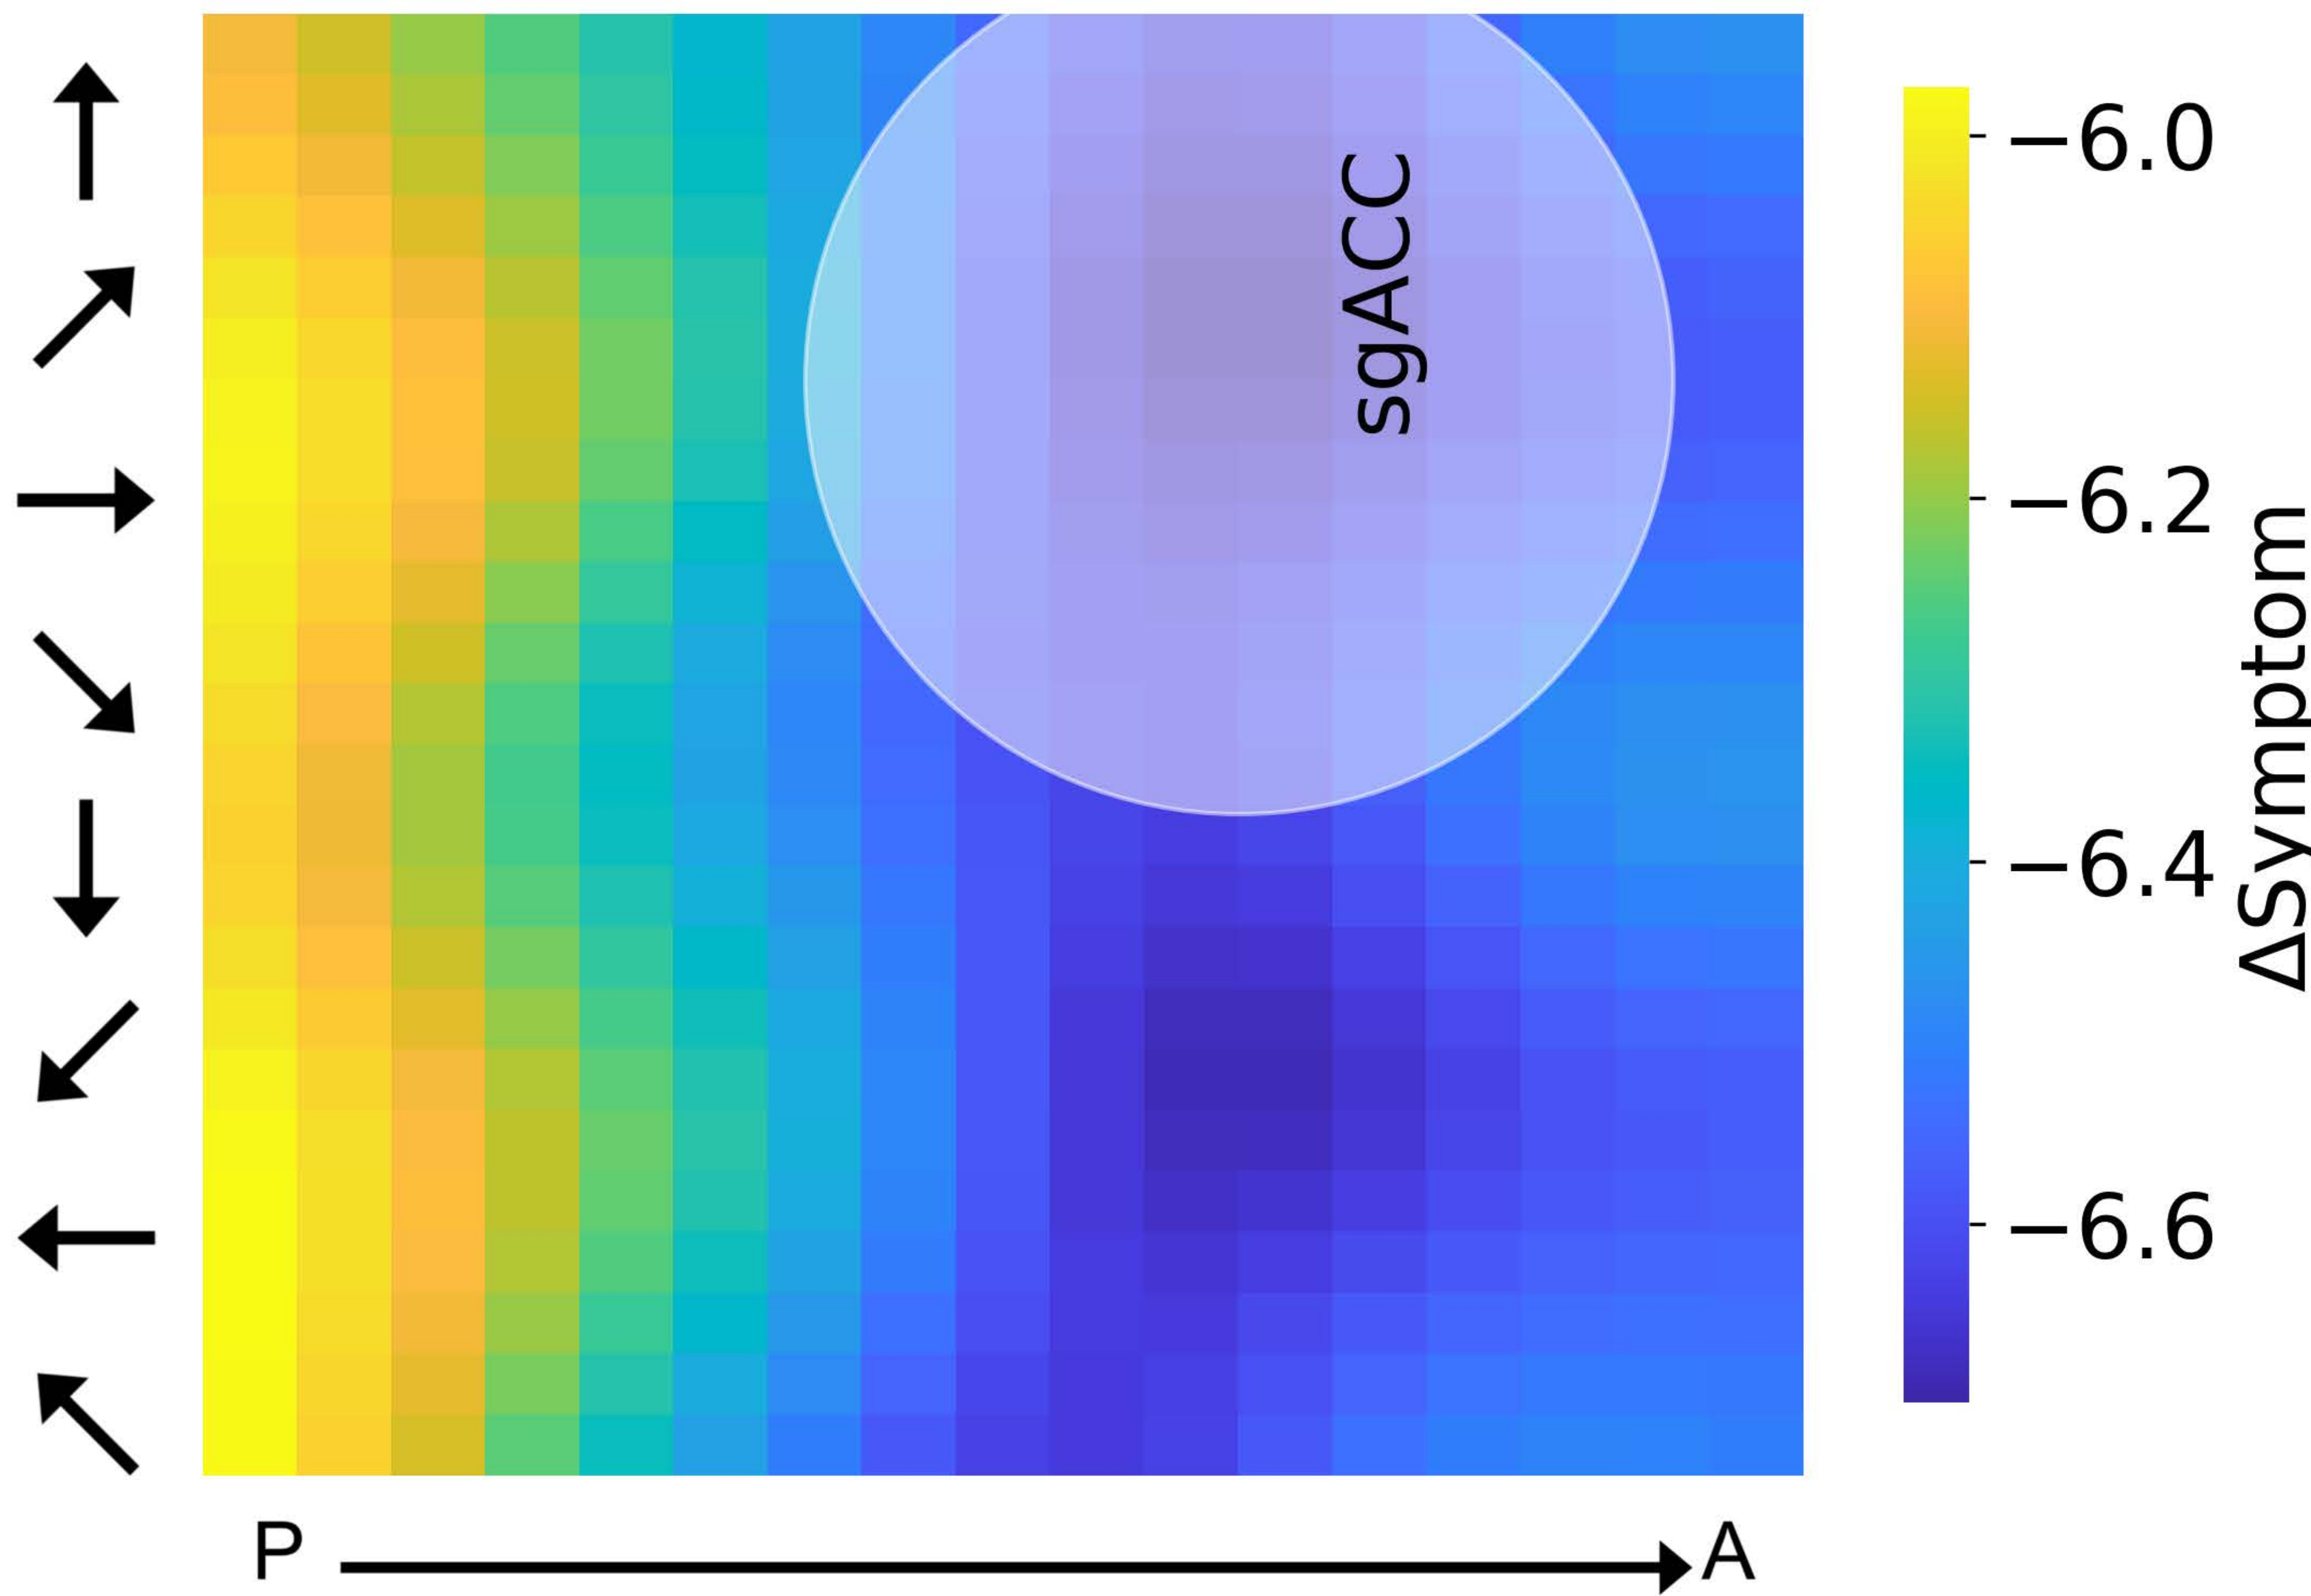



# INDARDU203PAW\_hamd\_left\_dlpfc

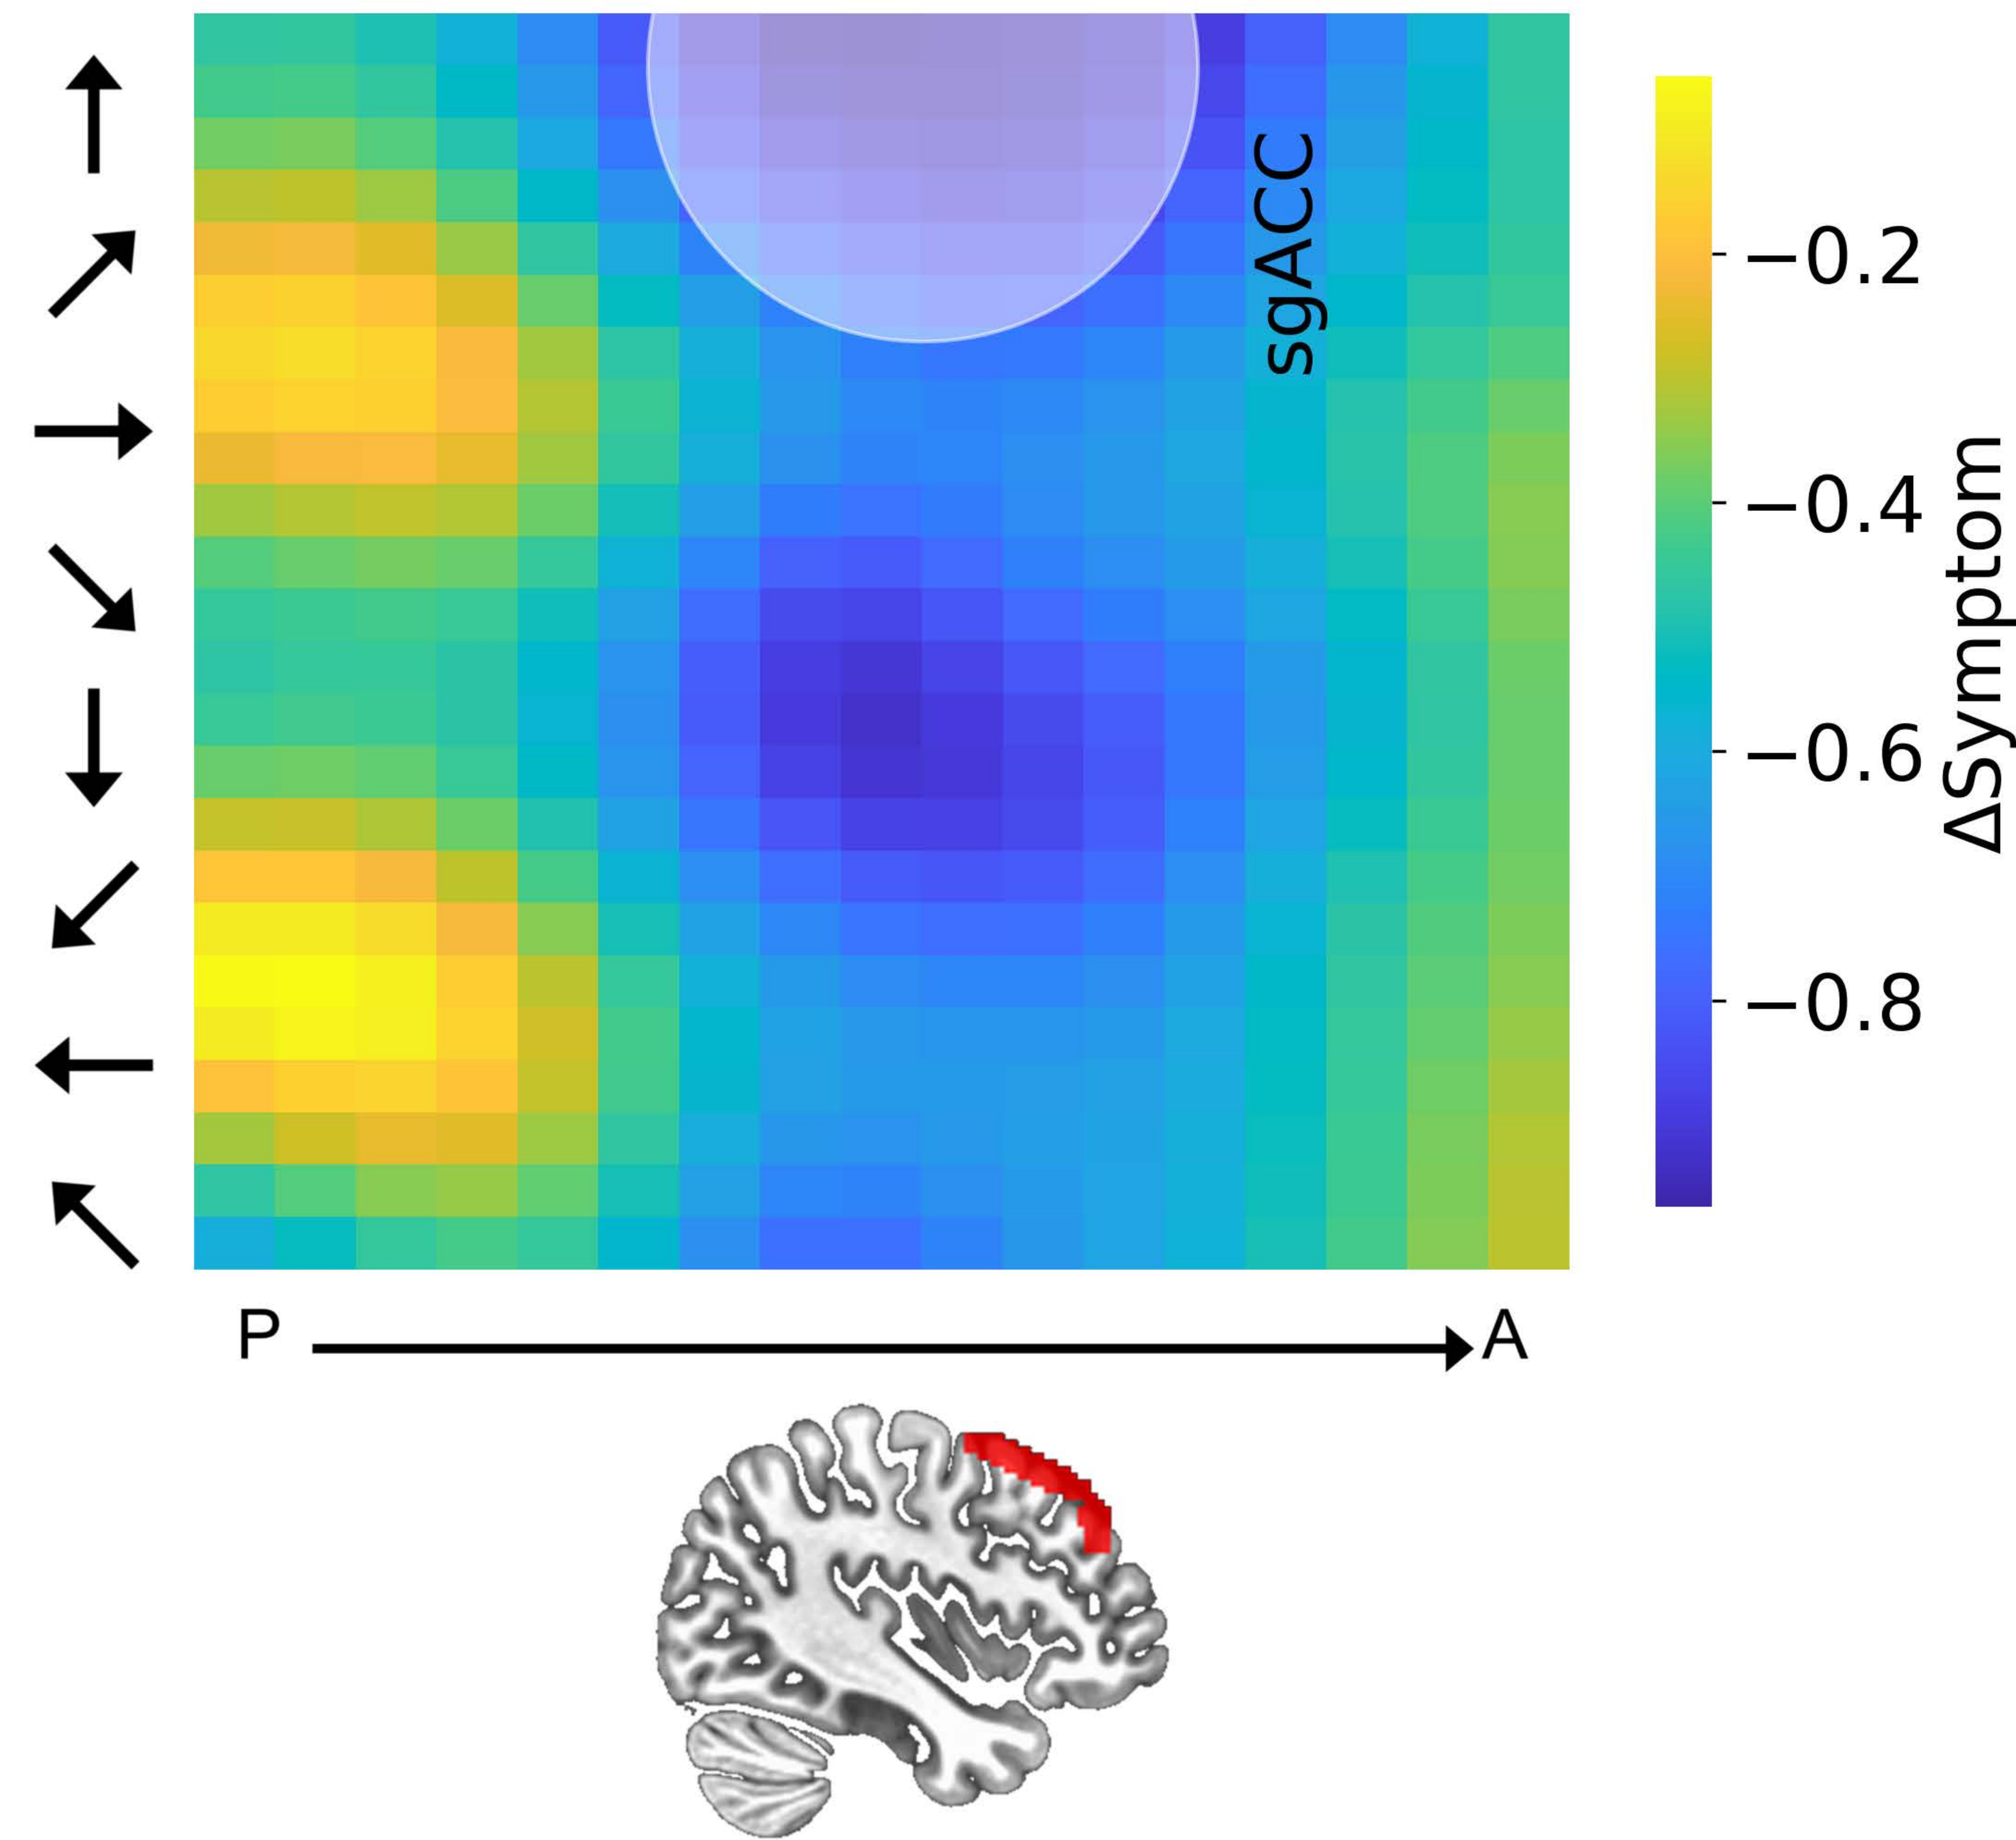



# INDARDU282NKX\_hamd\_left\_dlpfc

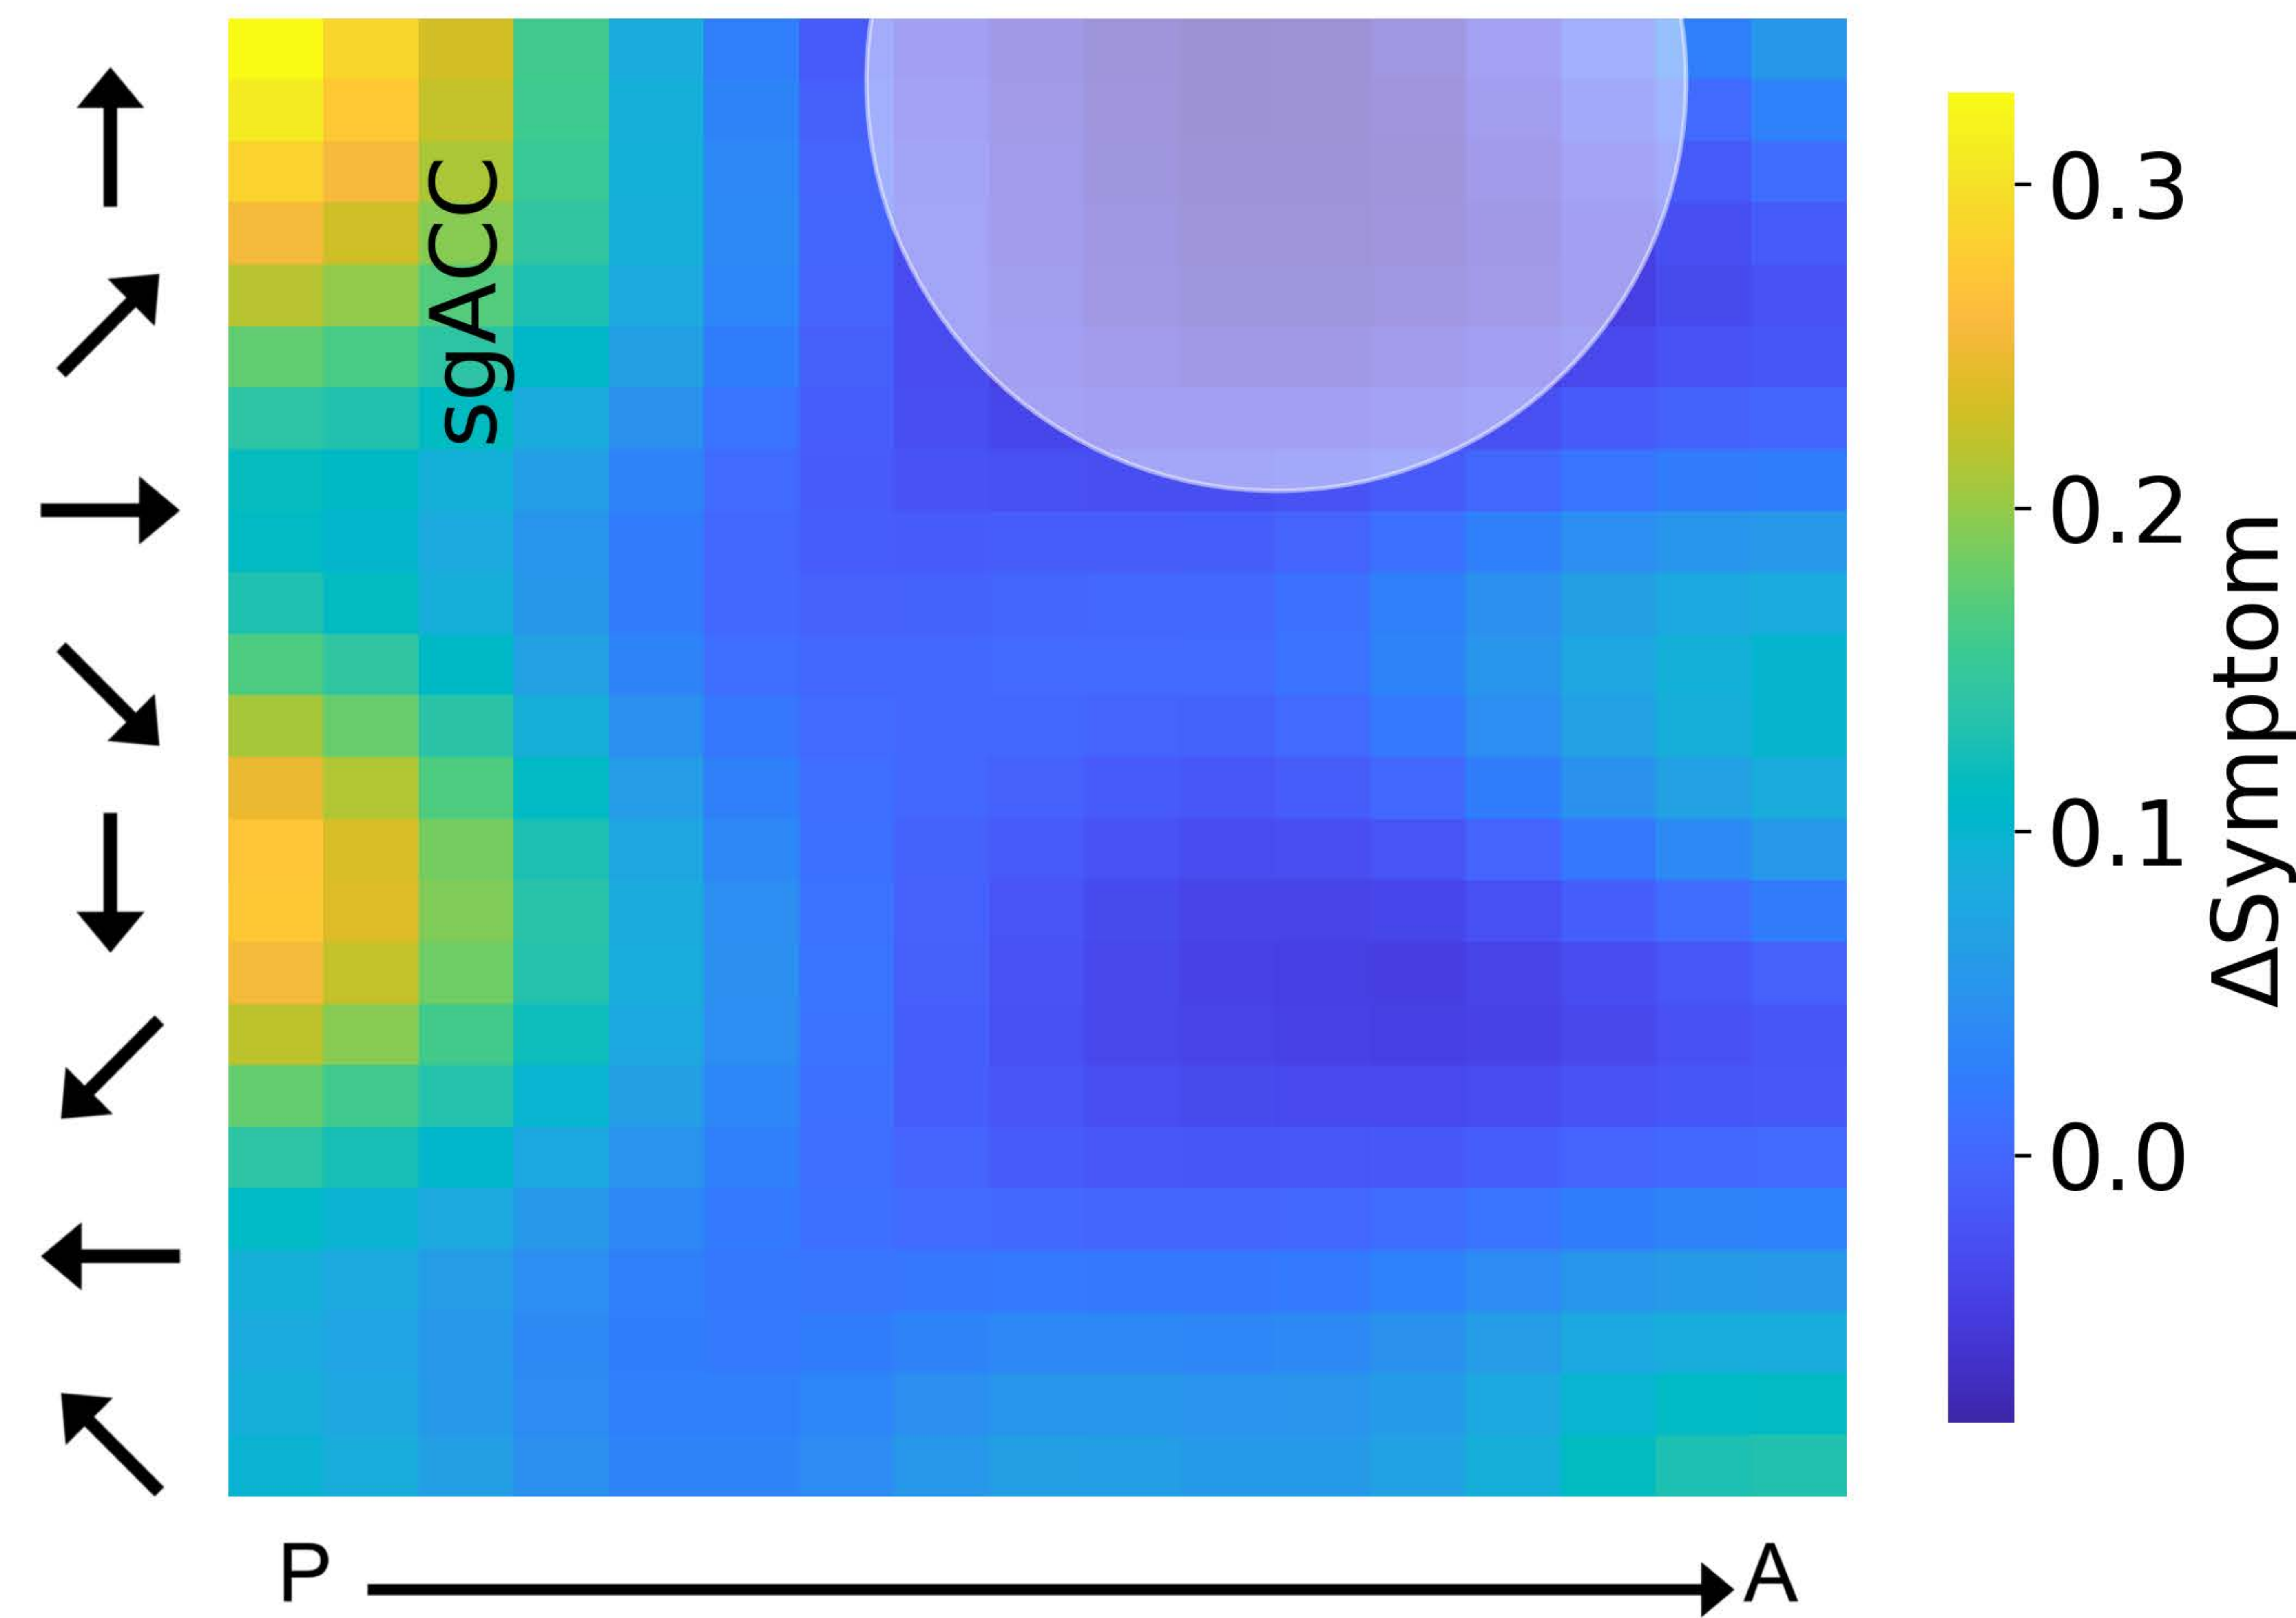



# INDARDV056JZW\_hamd\_left\_dlpfc

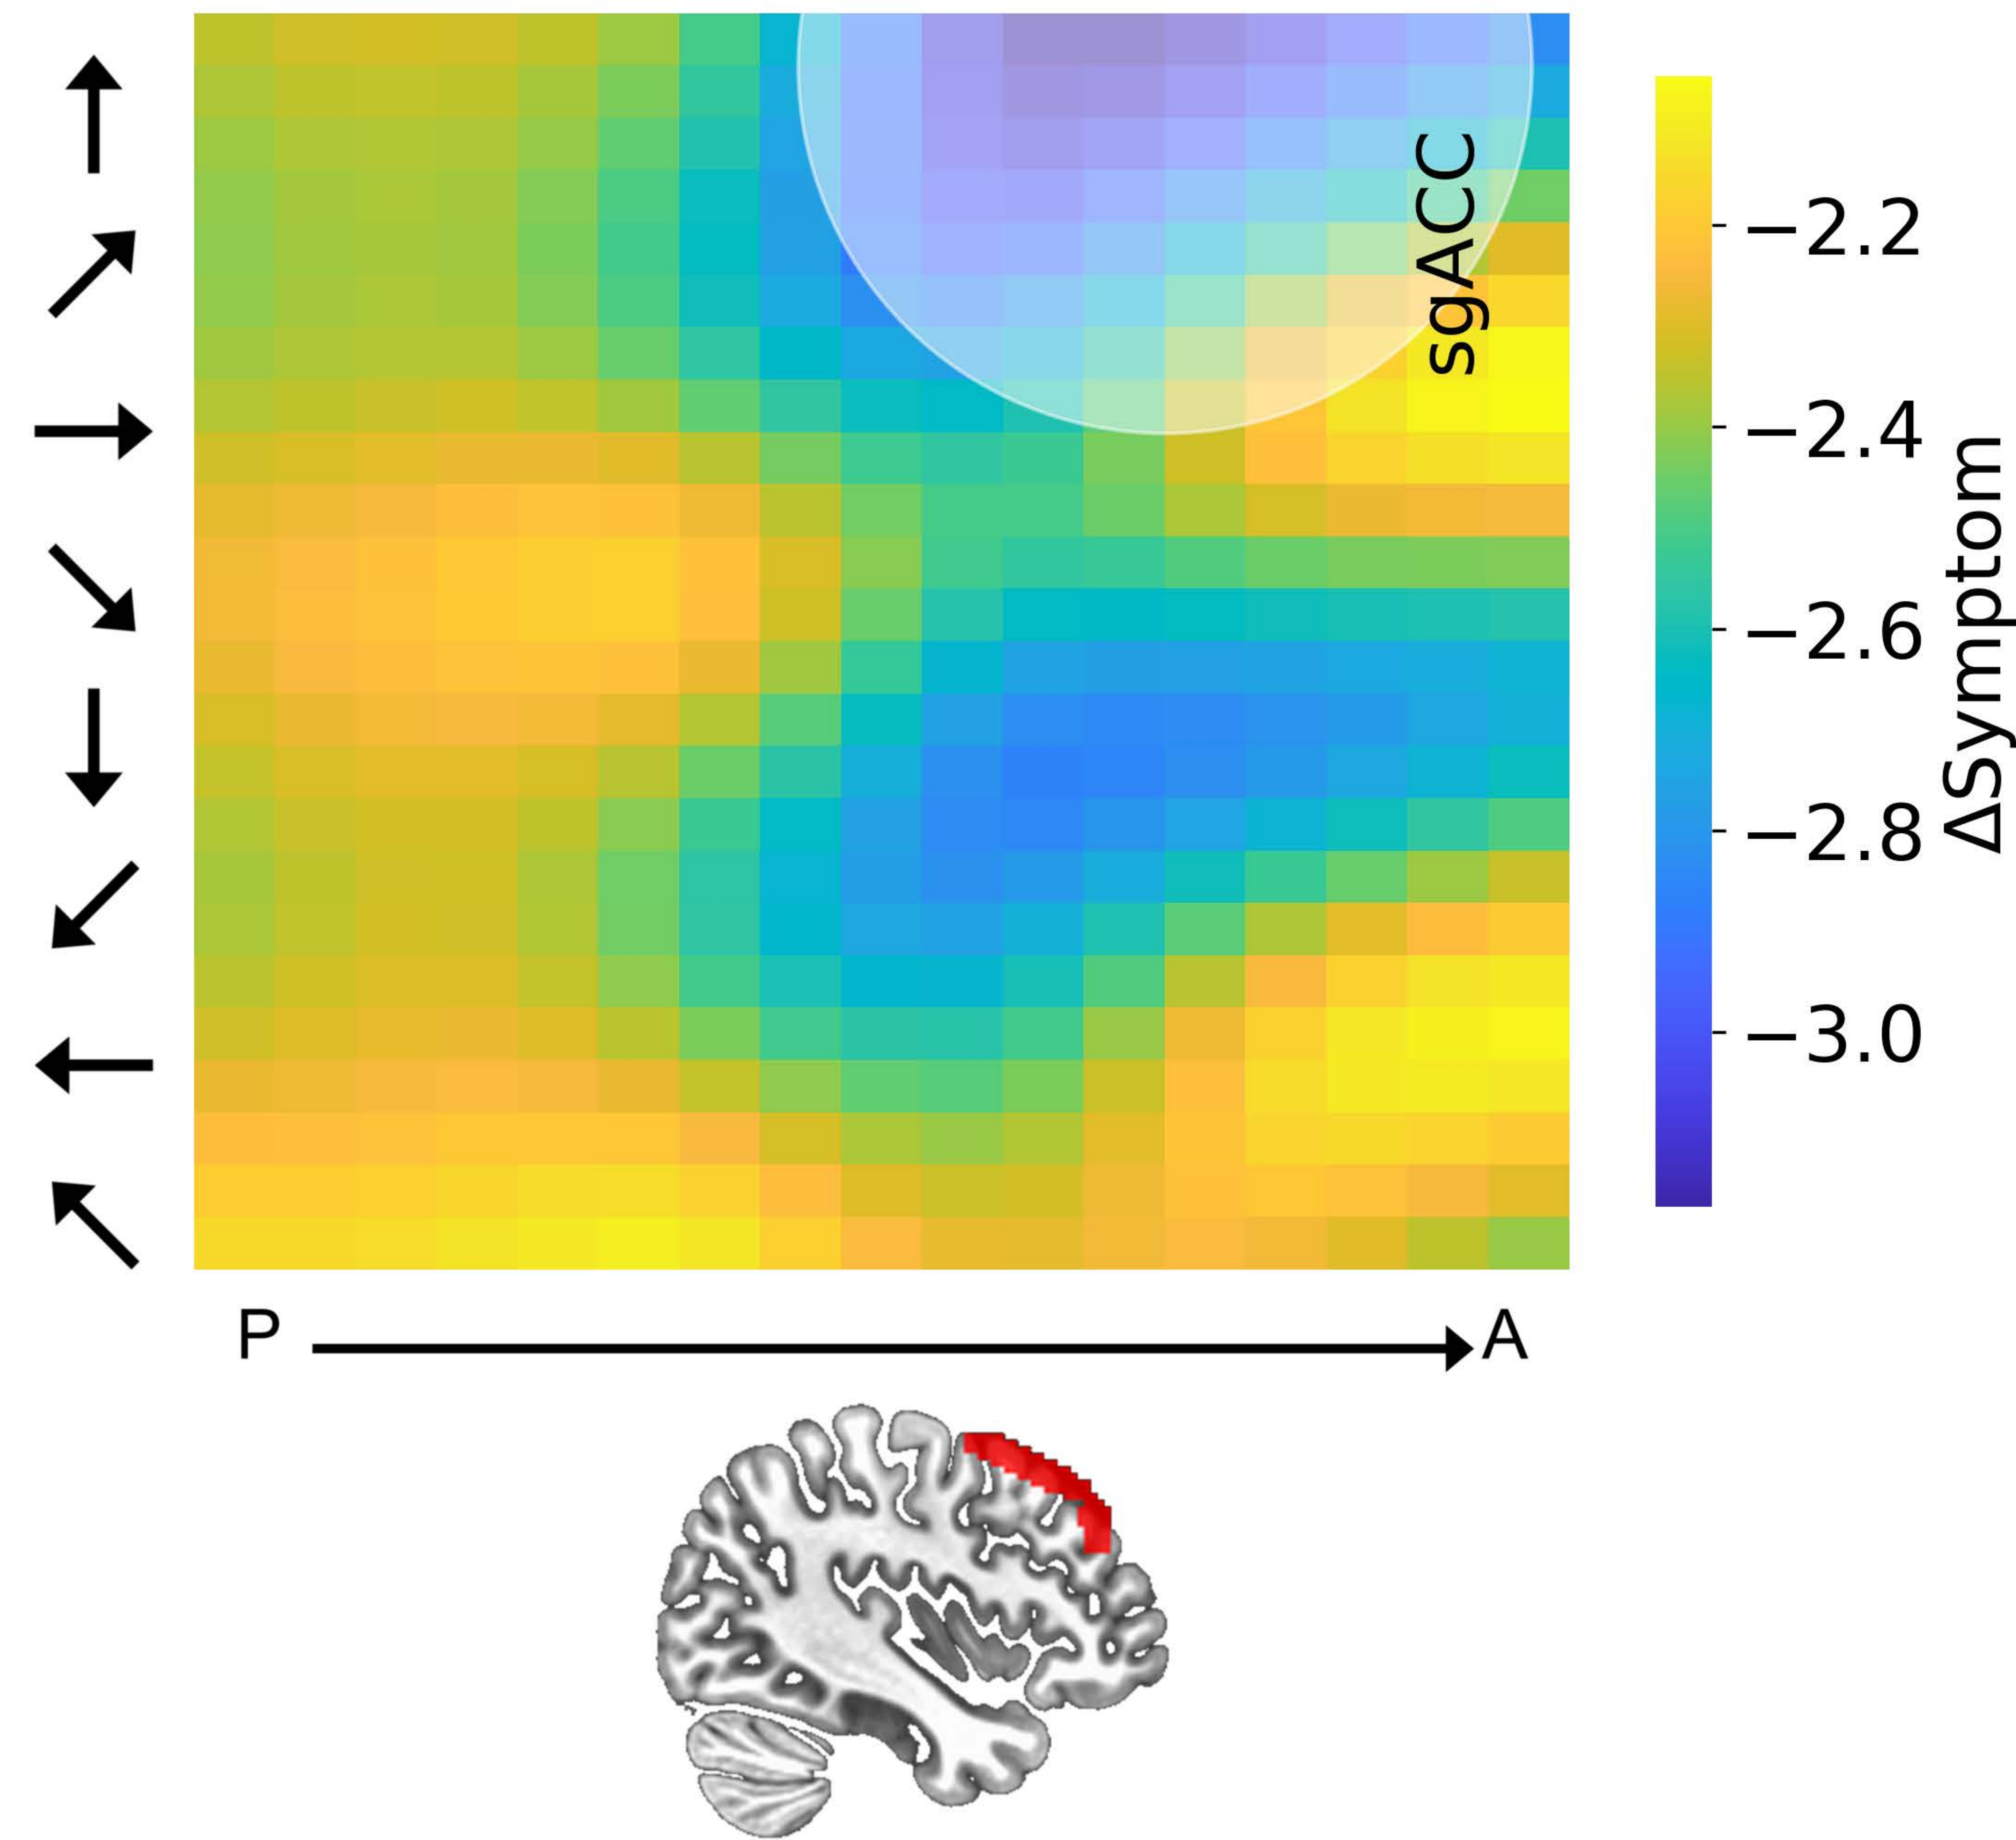



# NDAREB933ZEU\_hamd\_left\_dlpfc

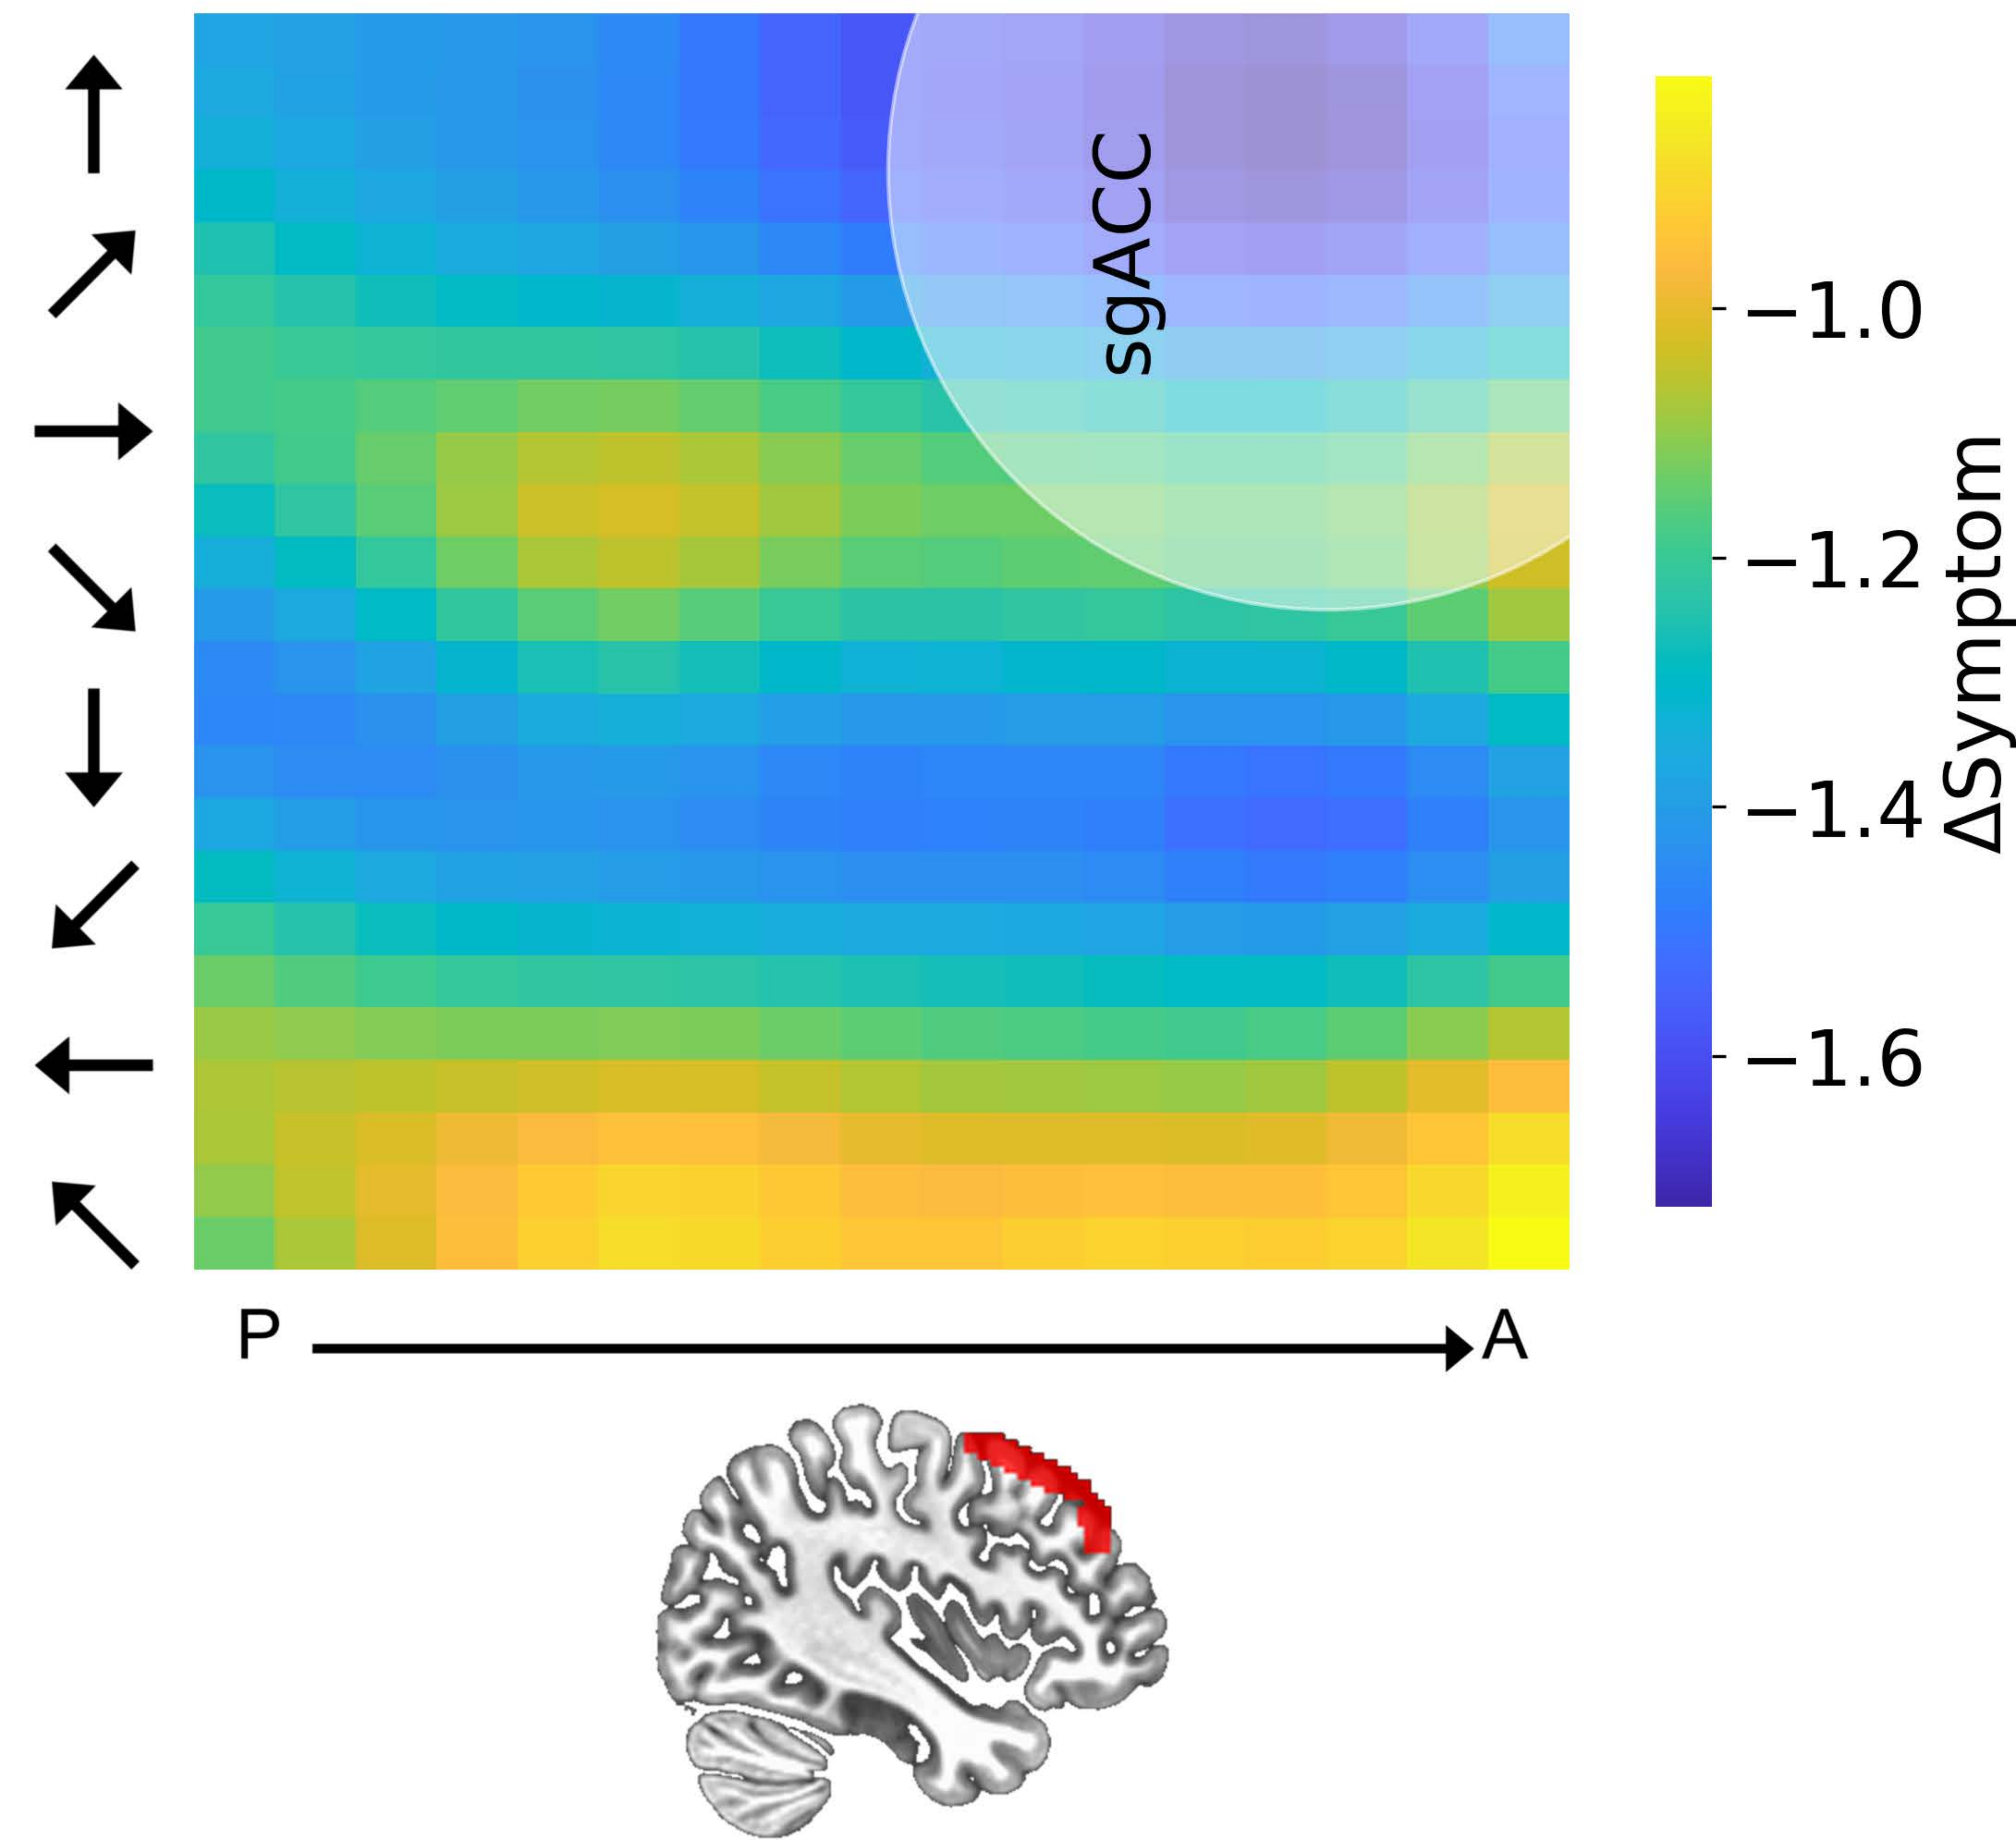



# INDAREU727GCY\_hamd\_left\_dlpfc

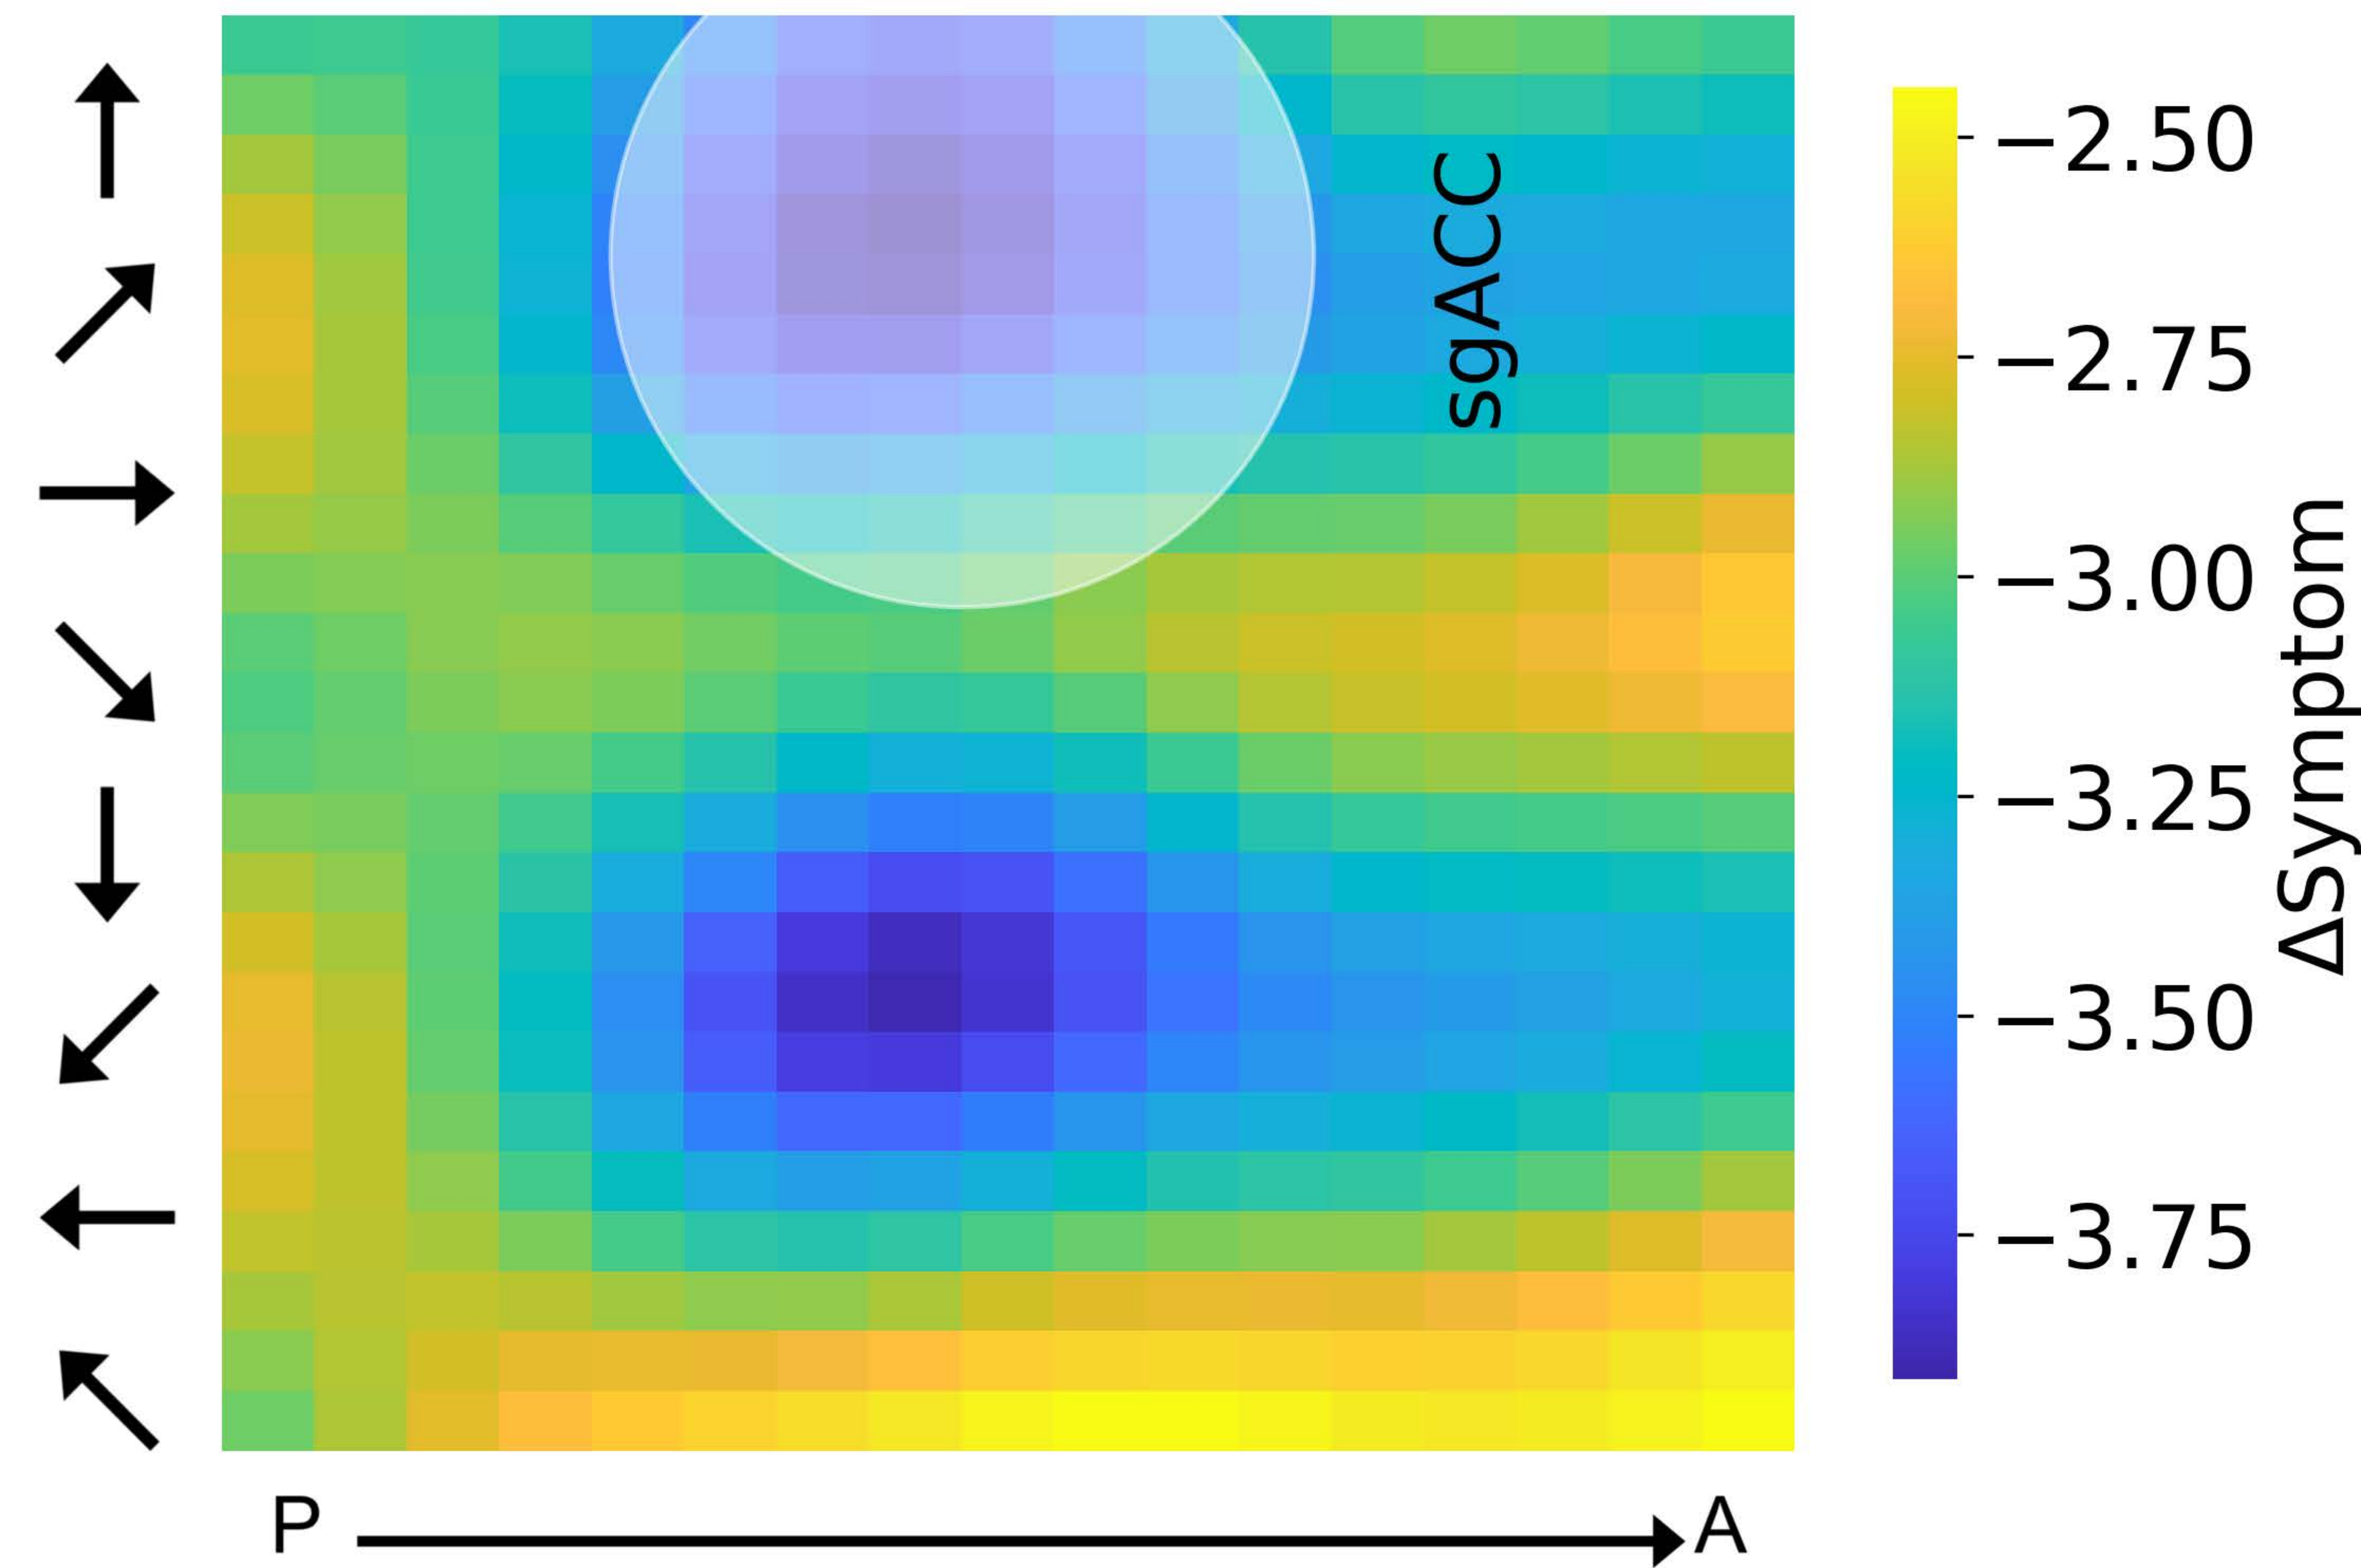



# INDAREW484UCJ\_hamd\_left\_dlpfc

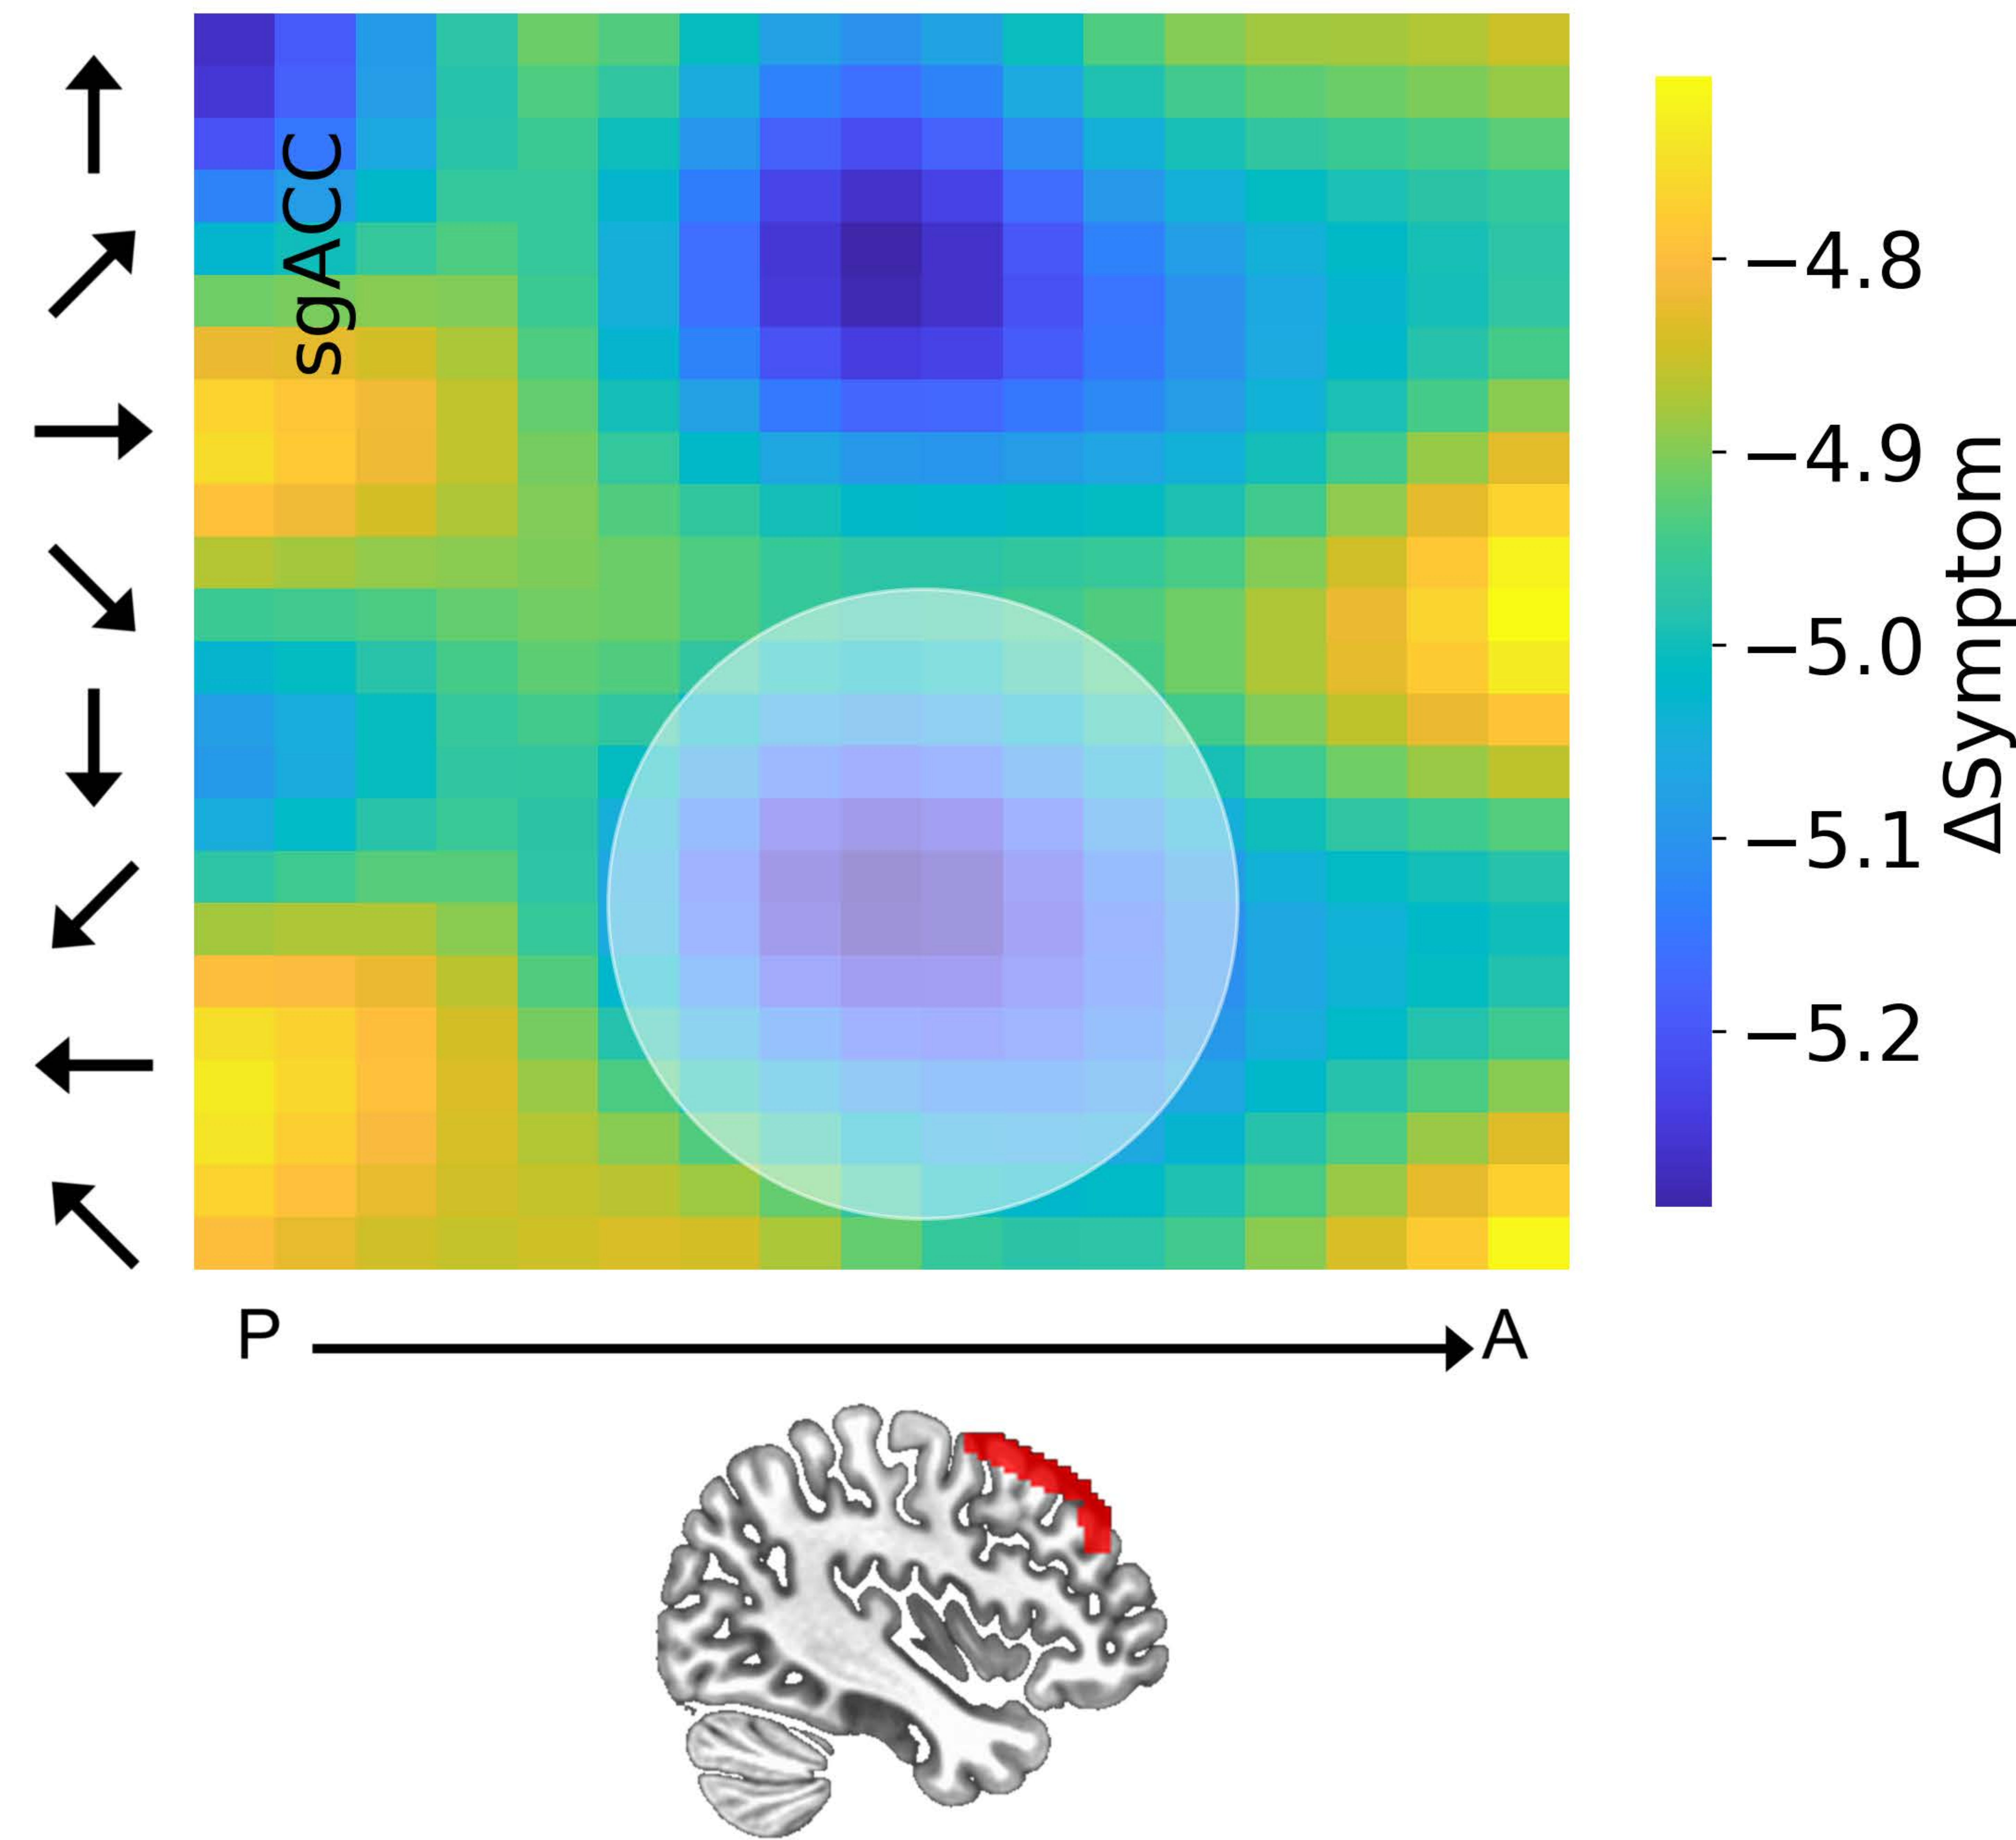



# NDAREZ915JK5\_hamd\_left\_dlpfc

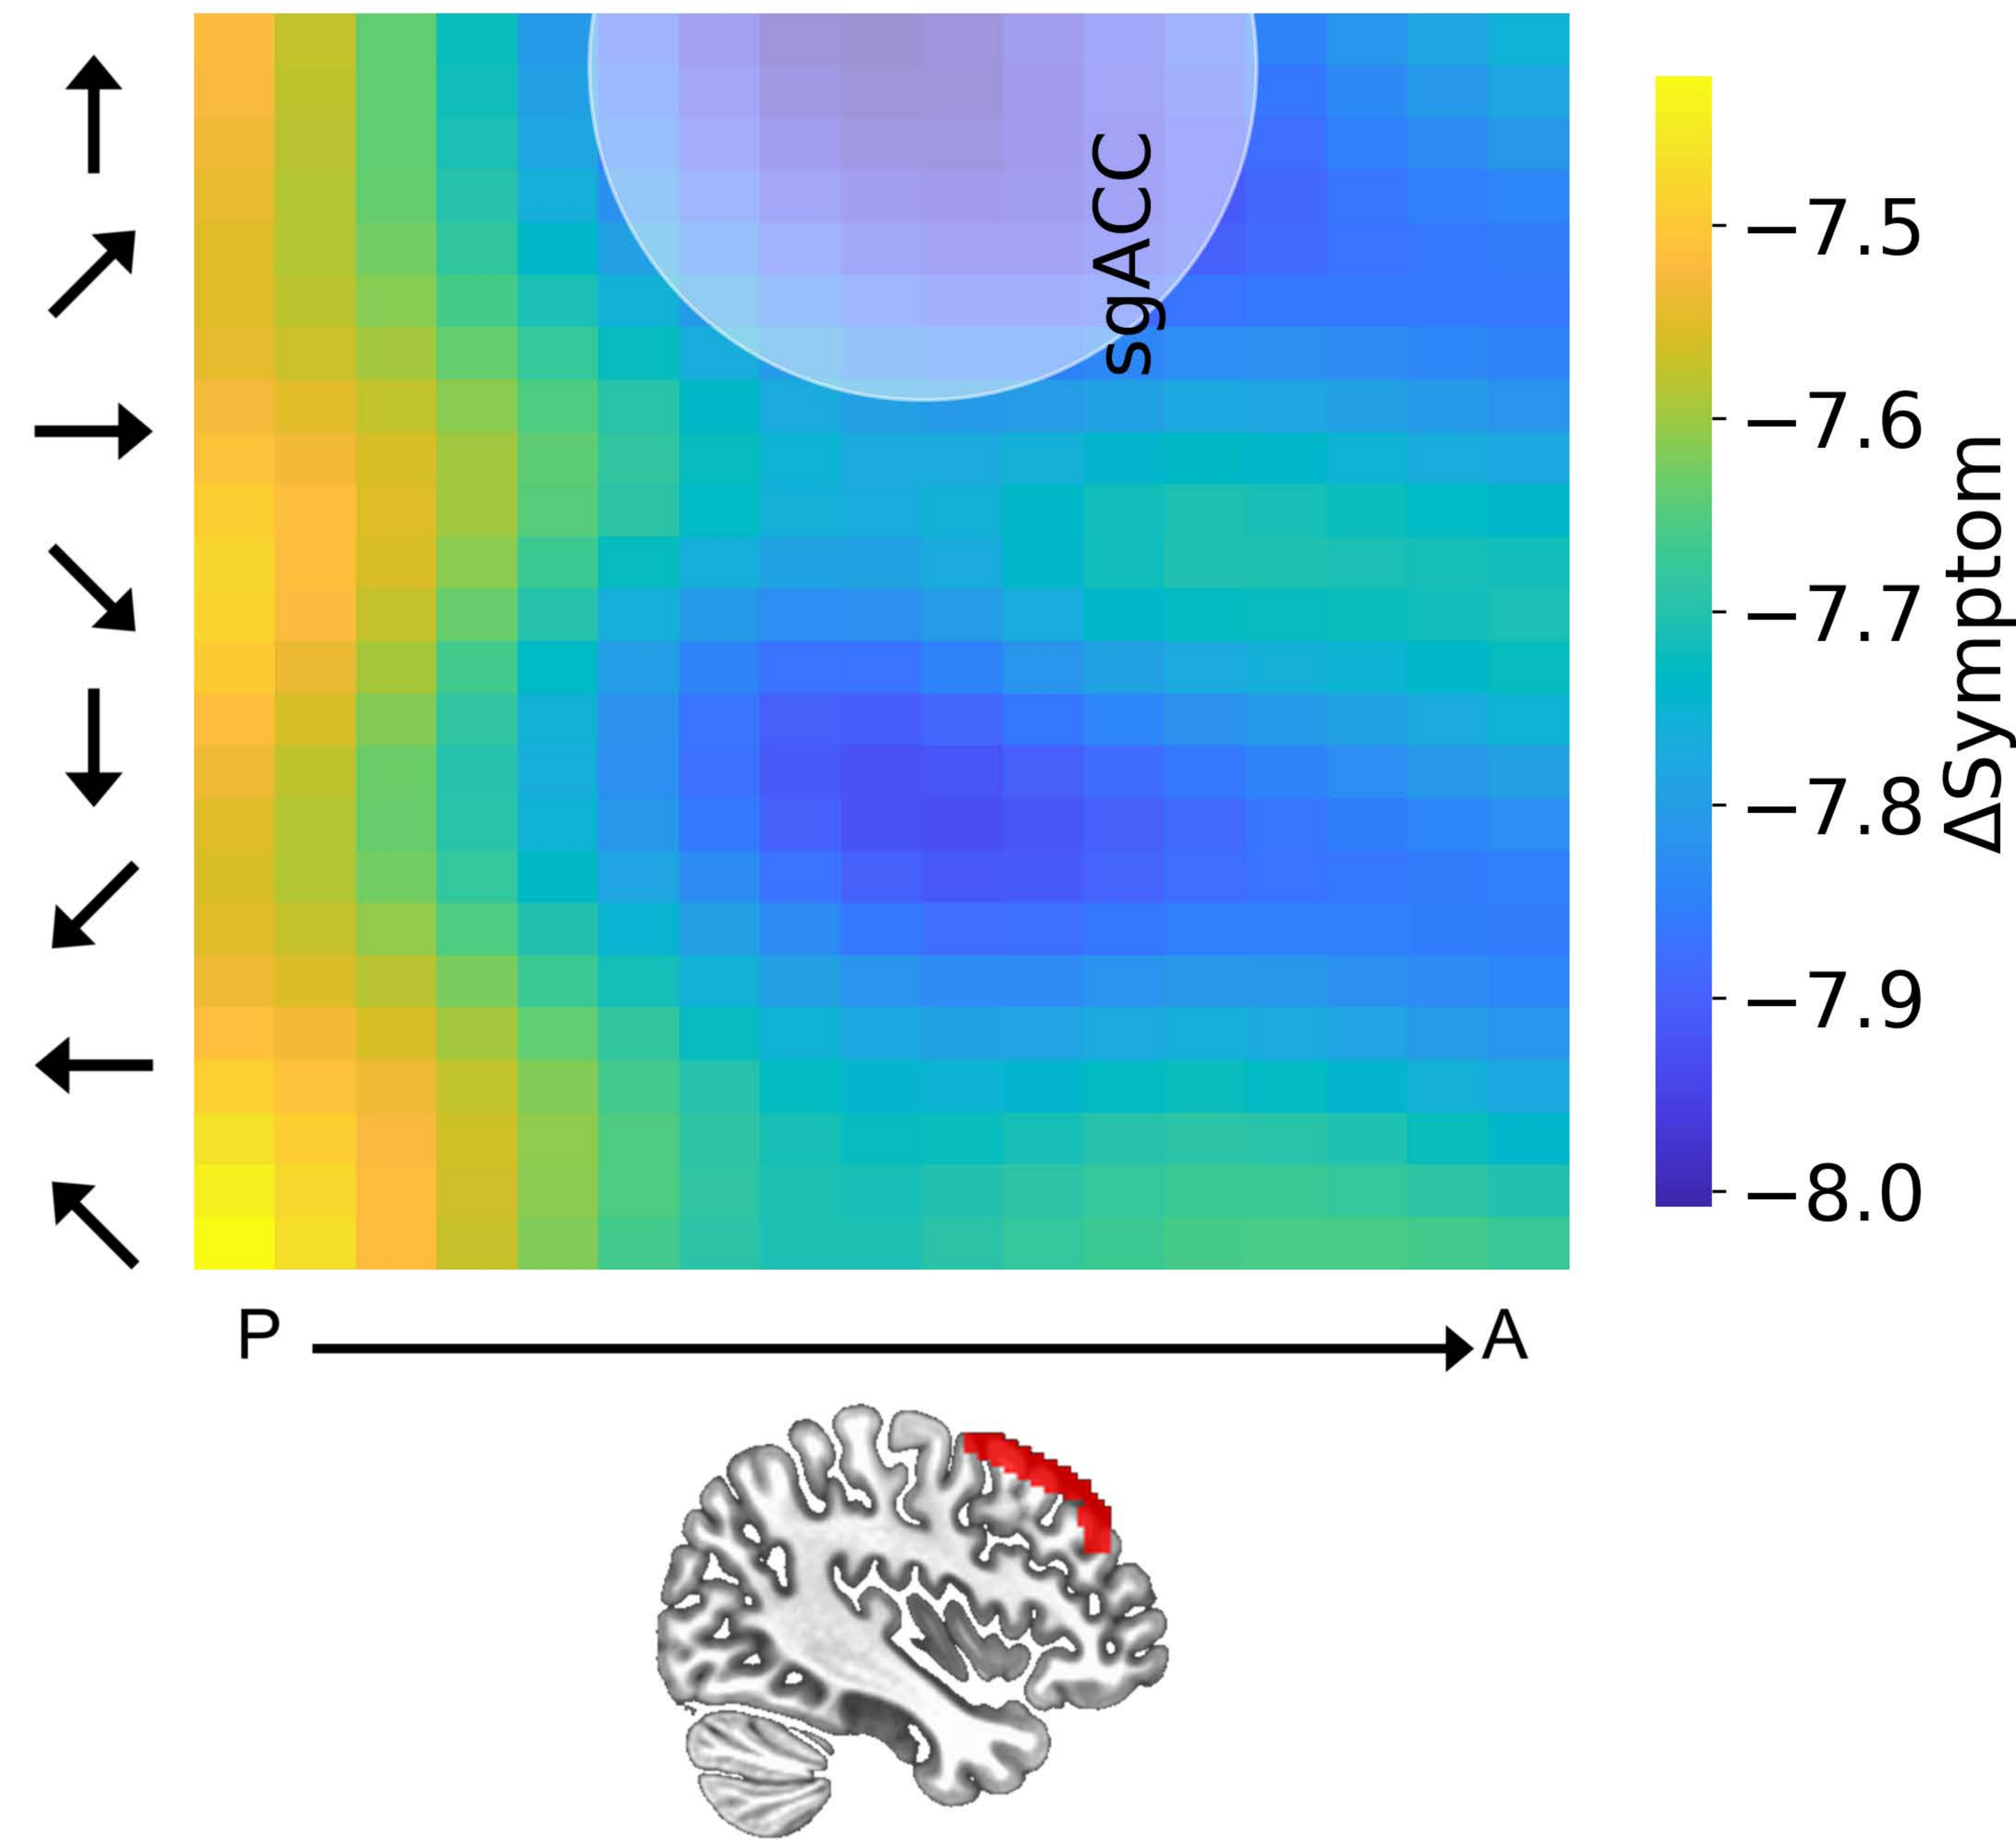



# NDARFH525MFZ\_hamd\_left\_dlpfc

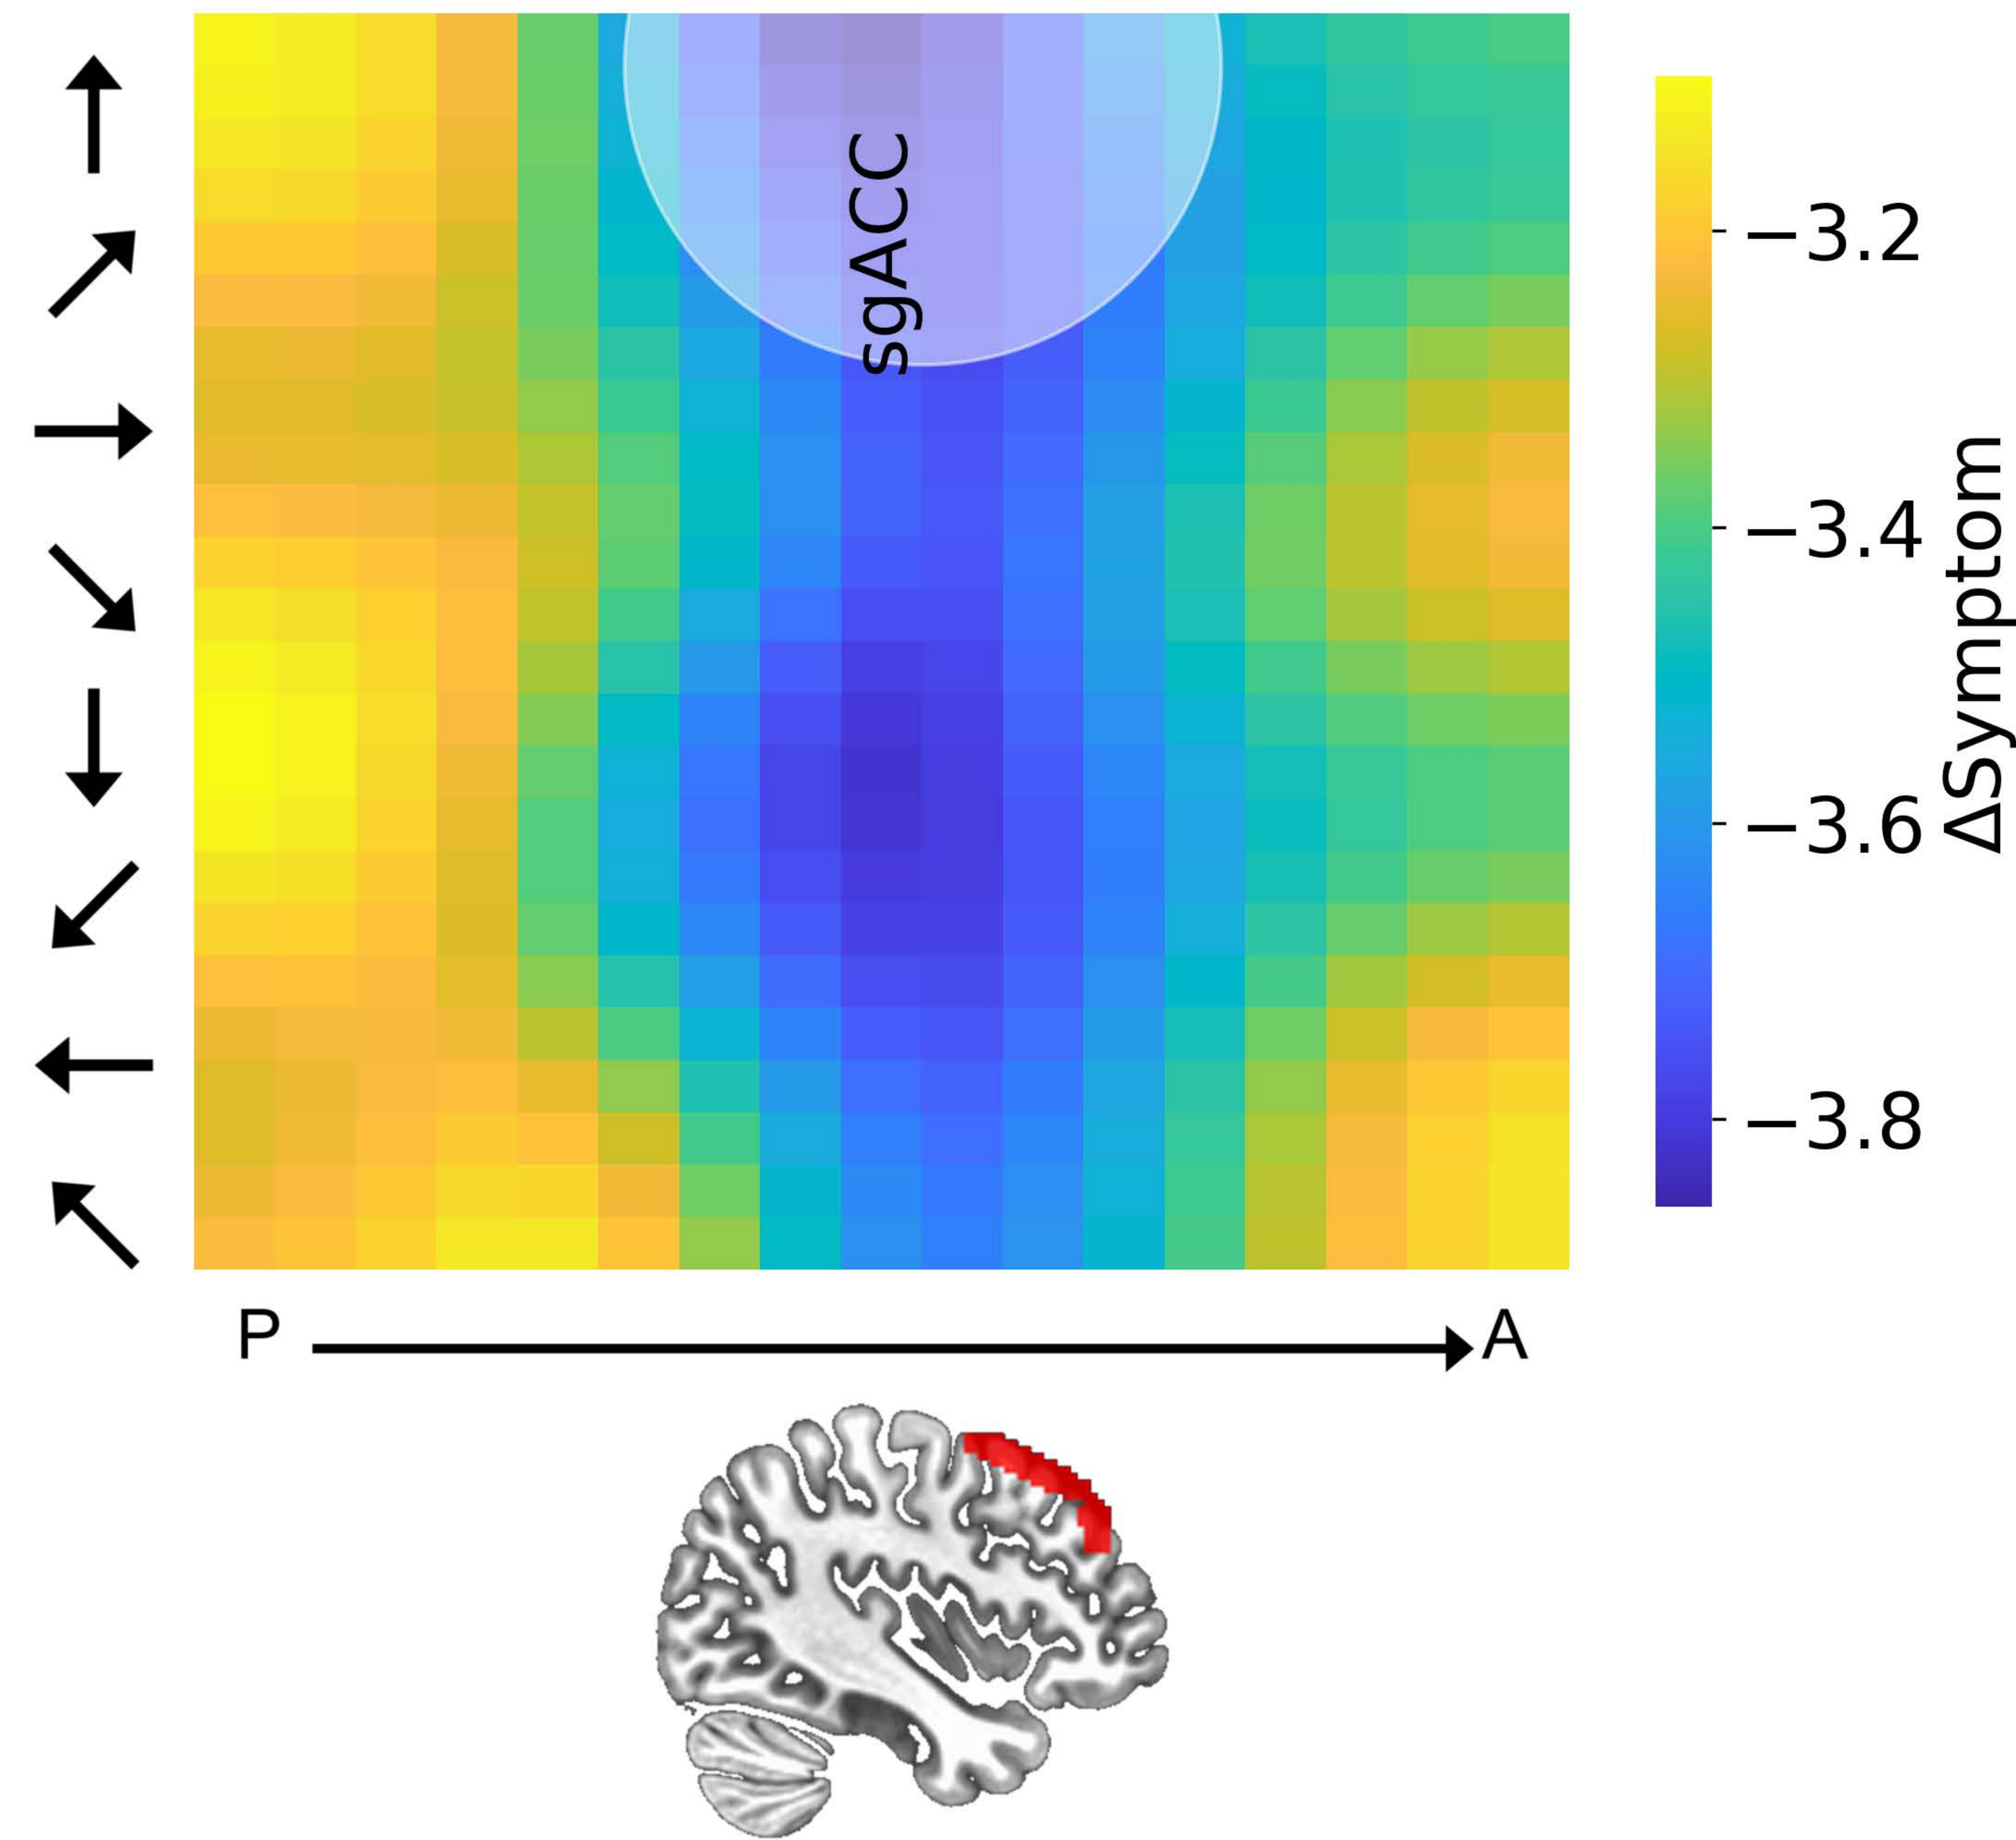



# INDARFR746ENQ\_hamd\_left\_dlpfc

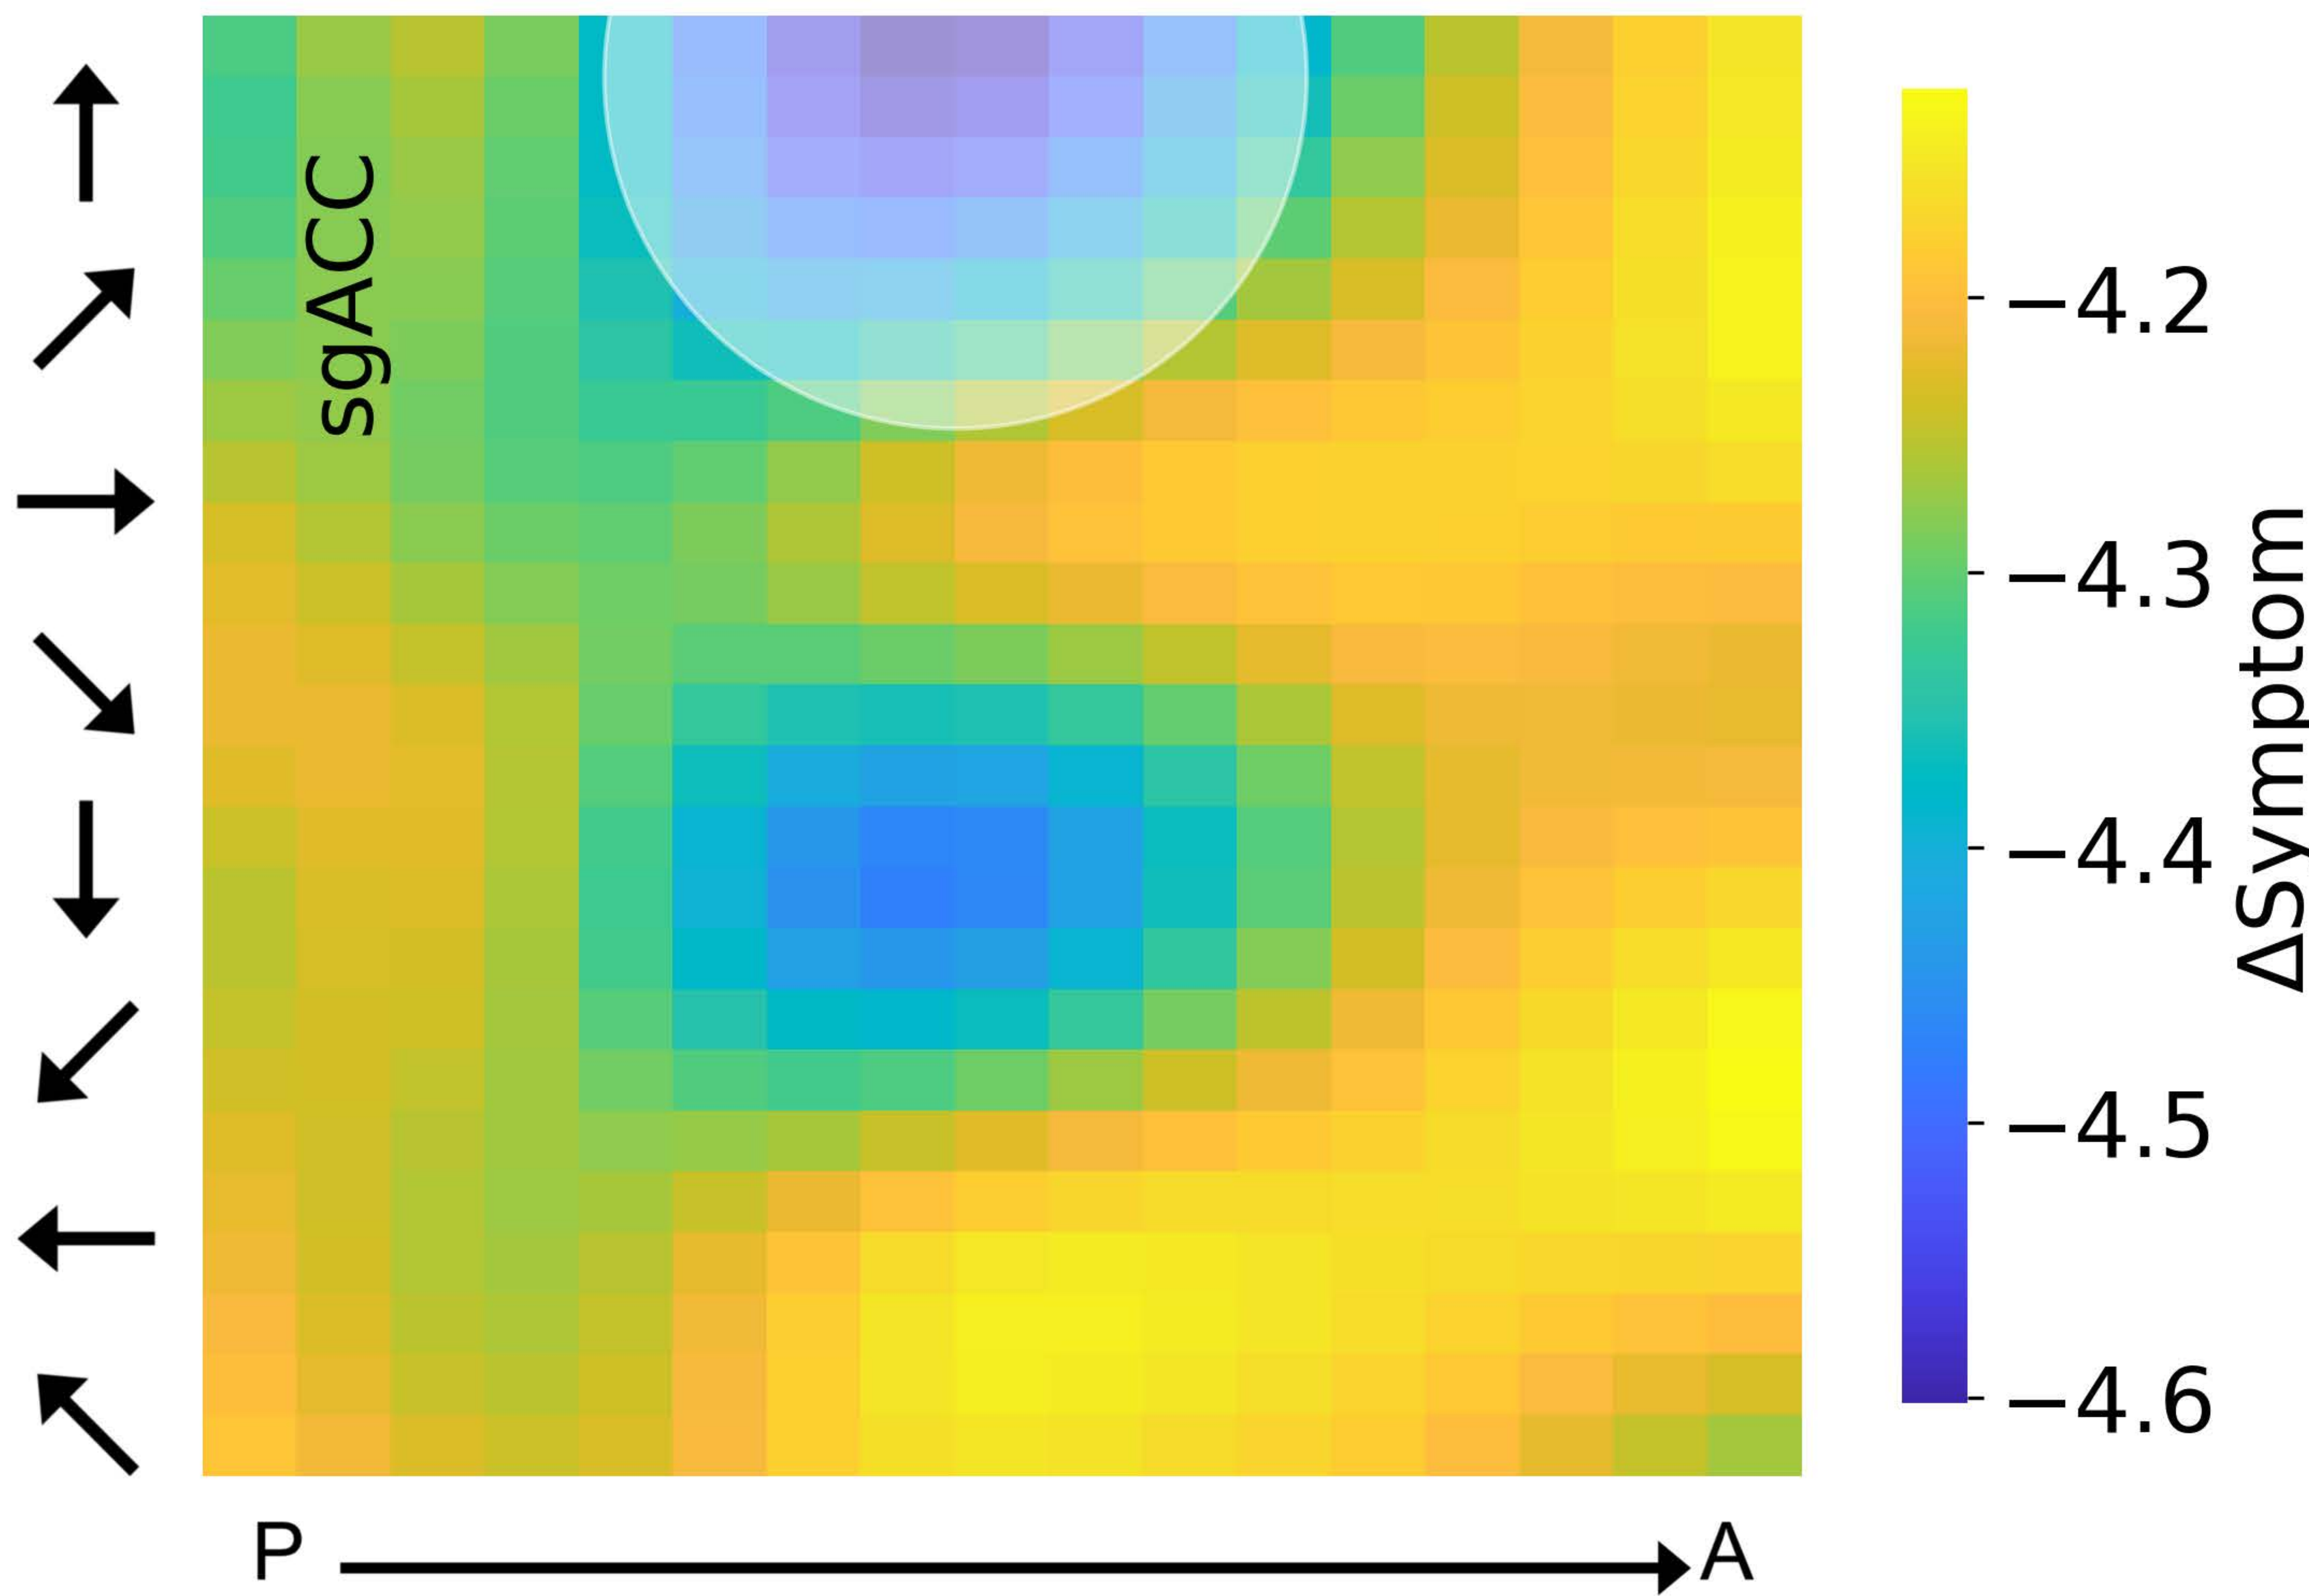



# INDARFW096LMD\_hamd\_left\_dlpfc

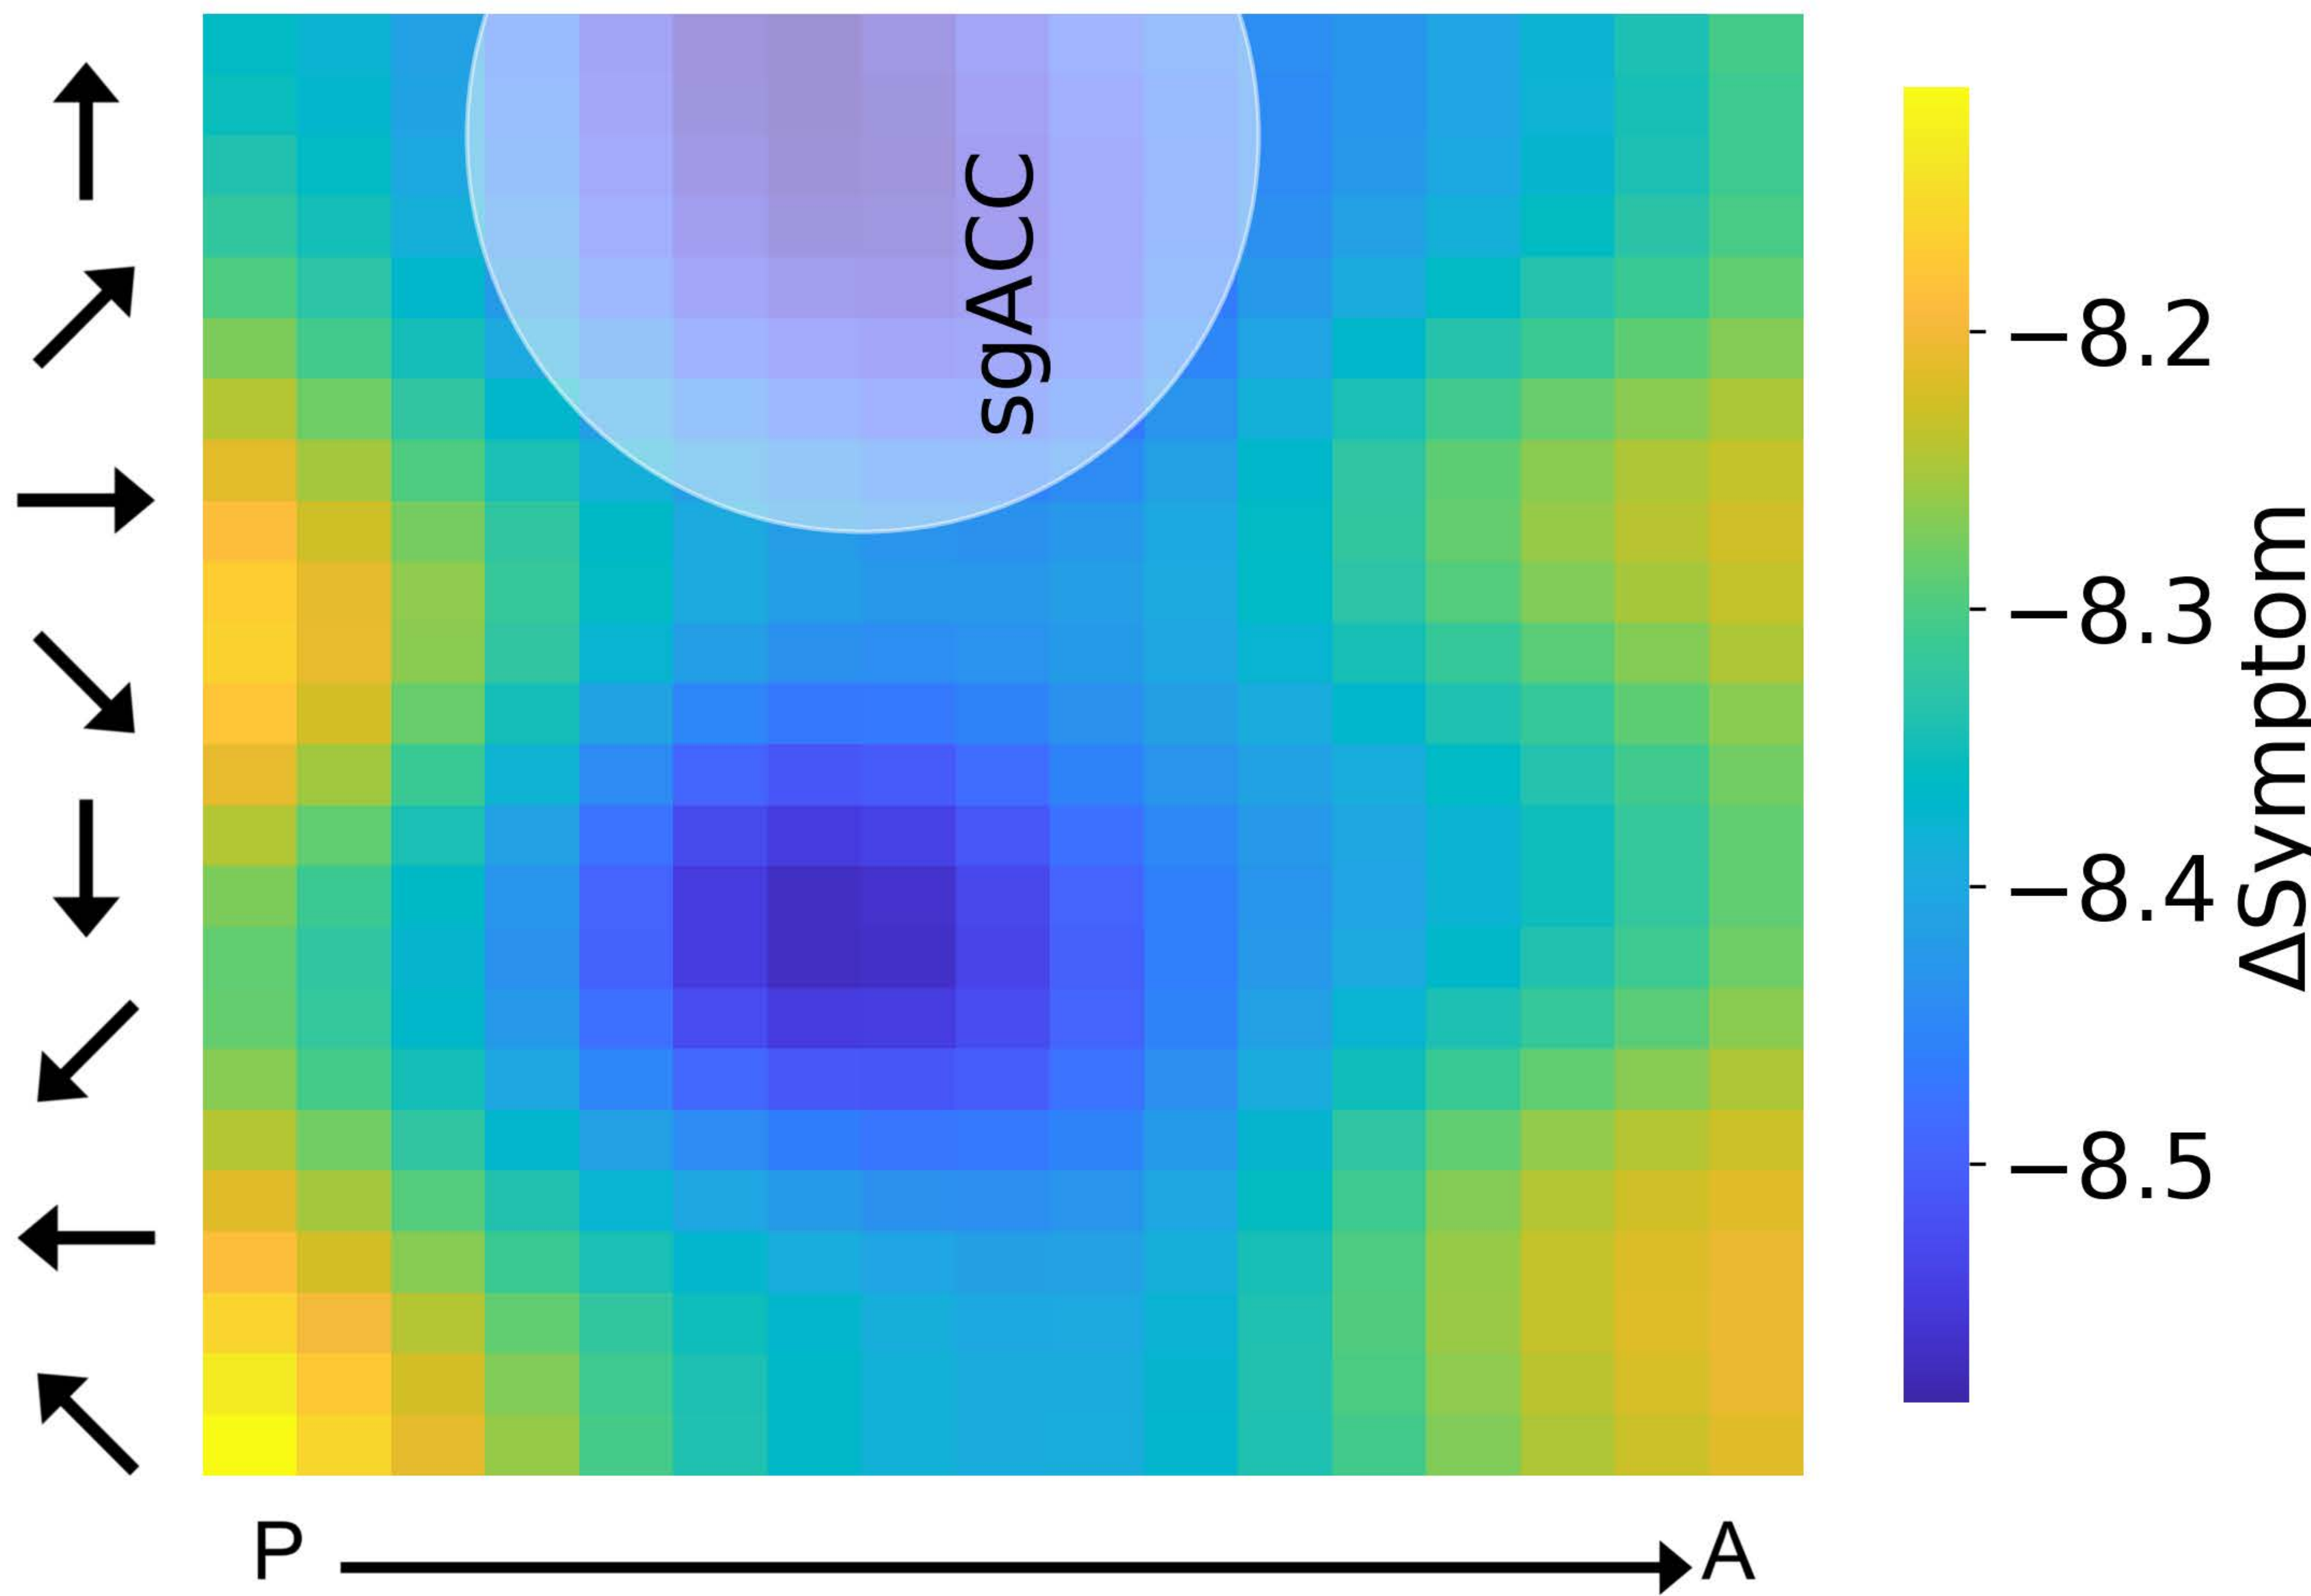



# NDARGH895WJJ\_hamd\_left\_dlpfc

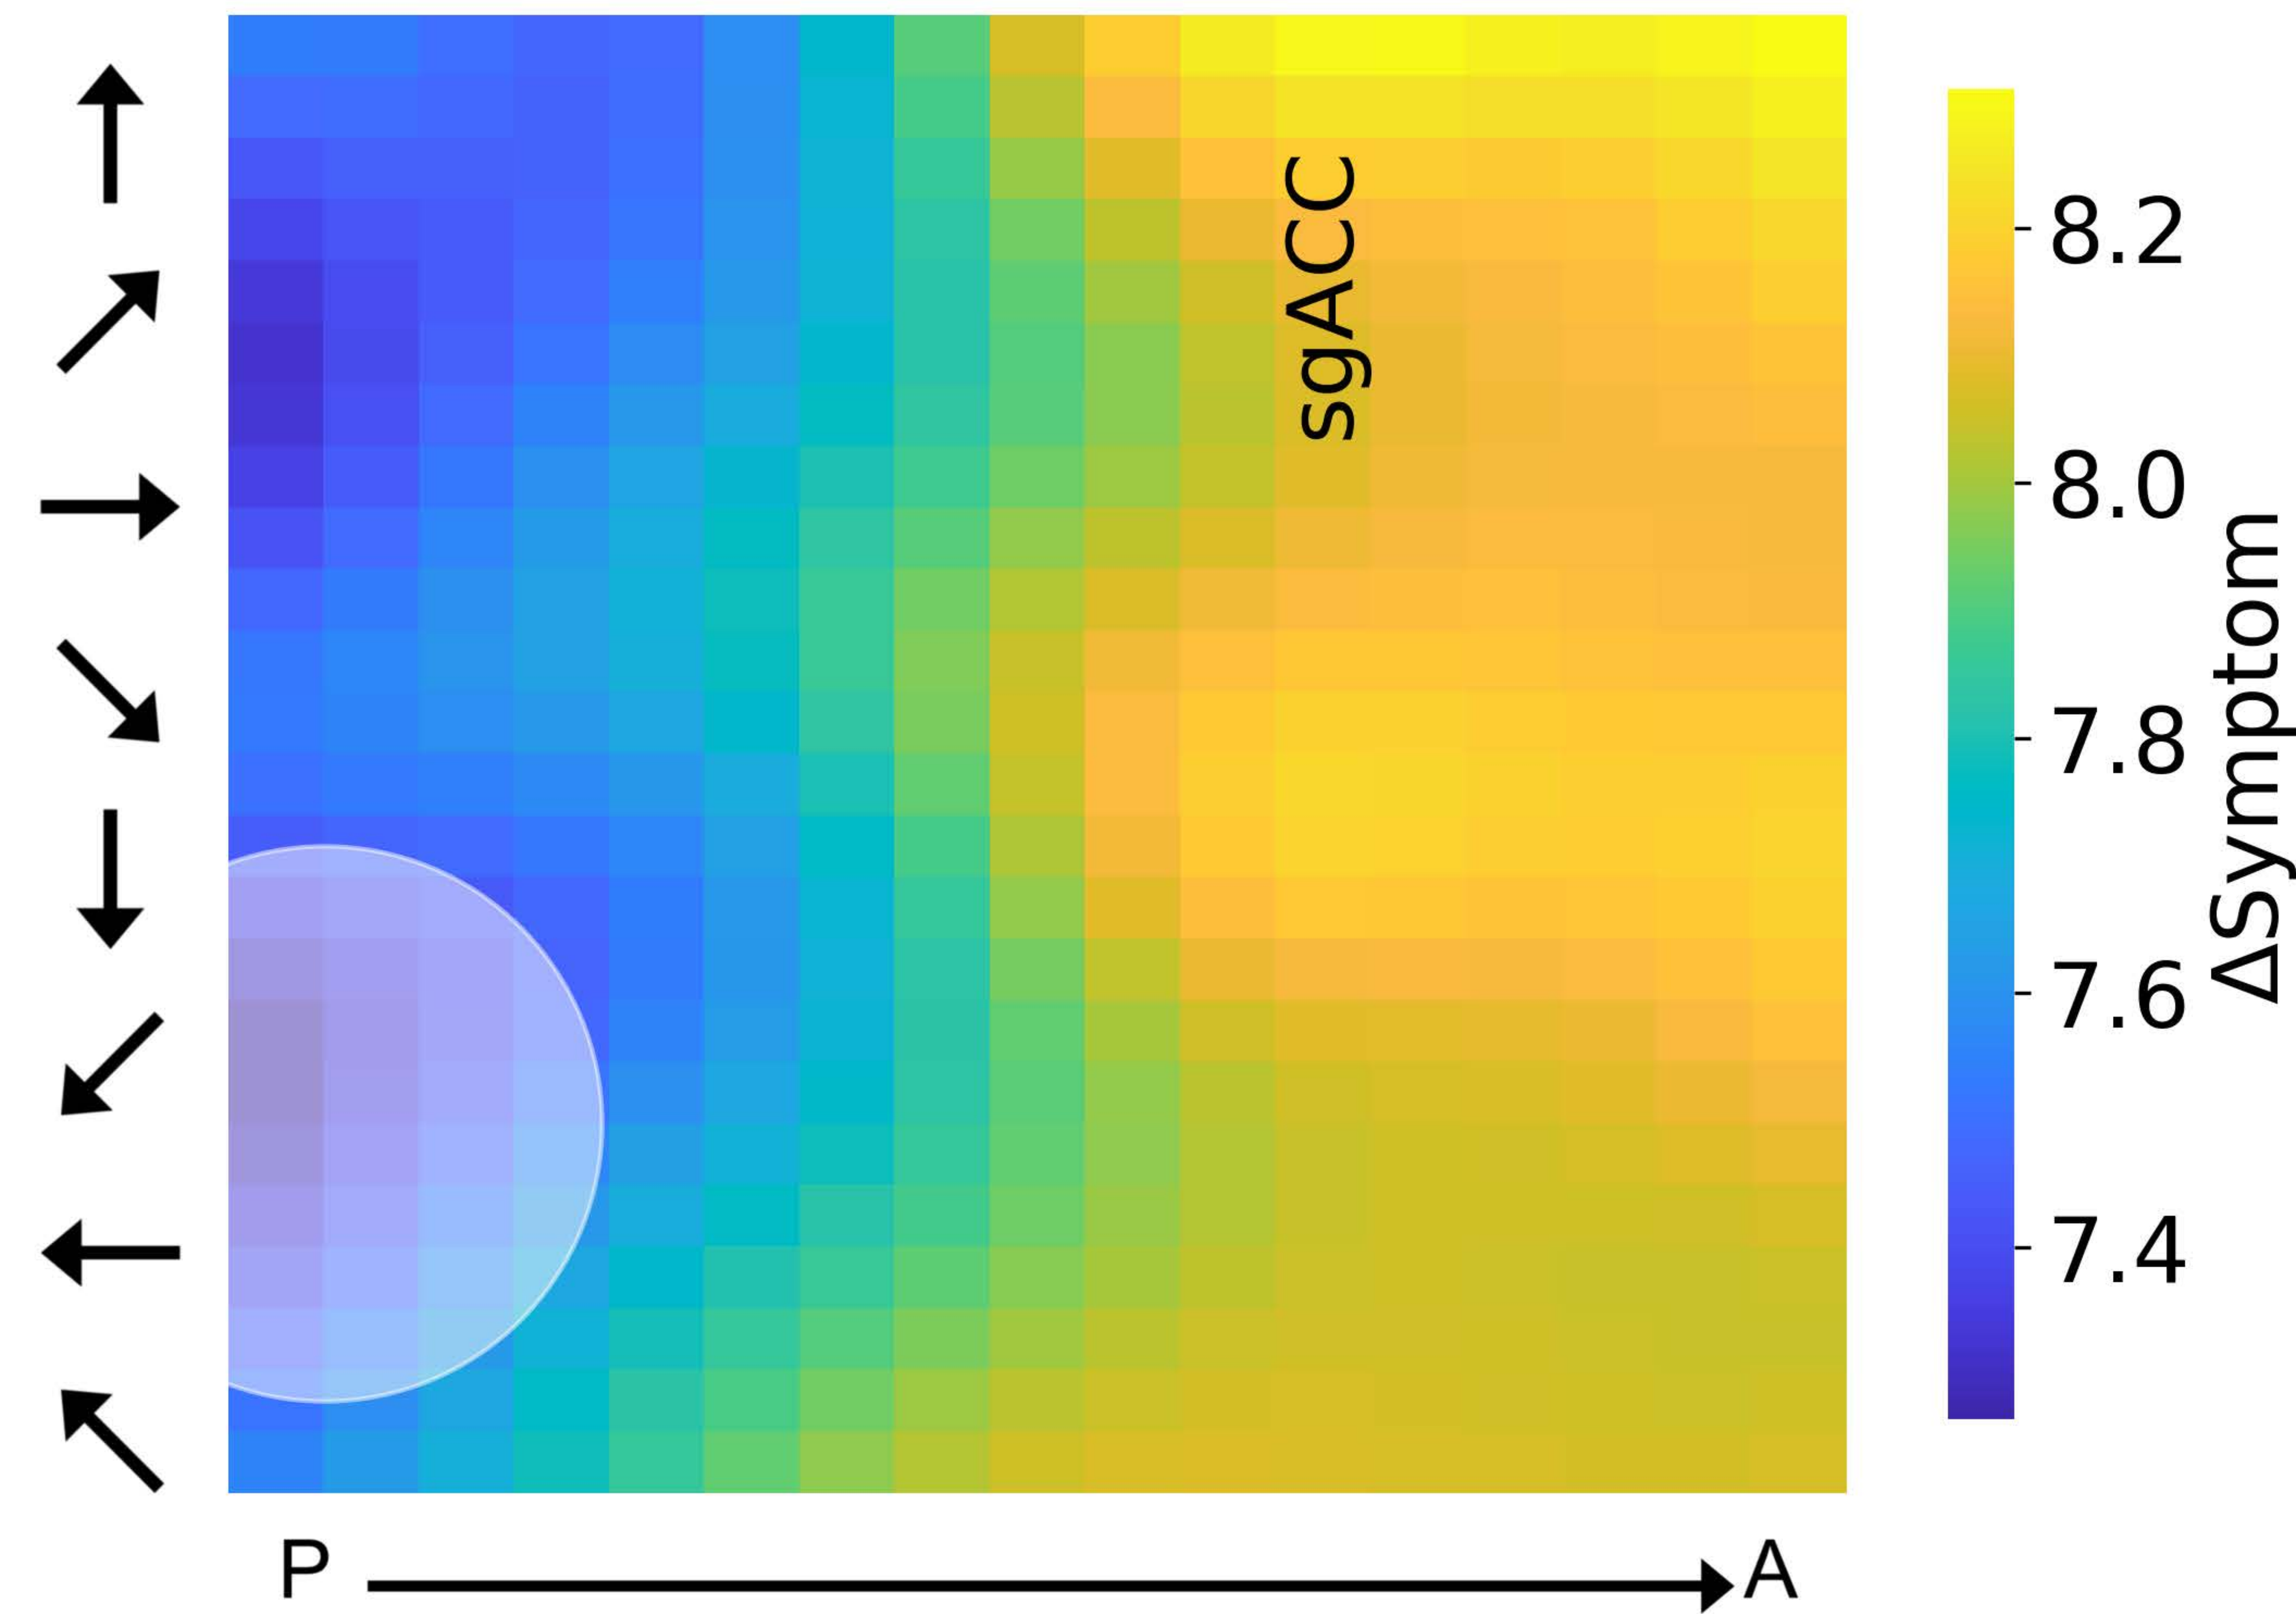



# NDARGR637FTT\_hamd\_left\_dlpfc

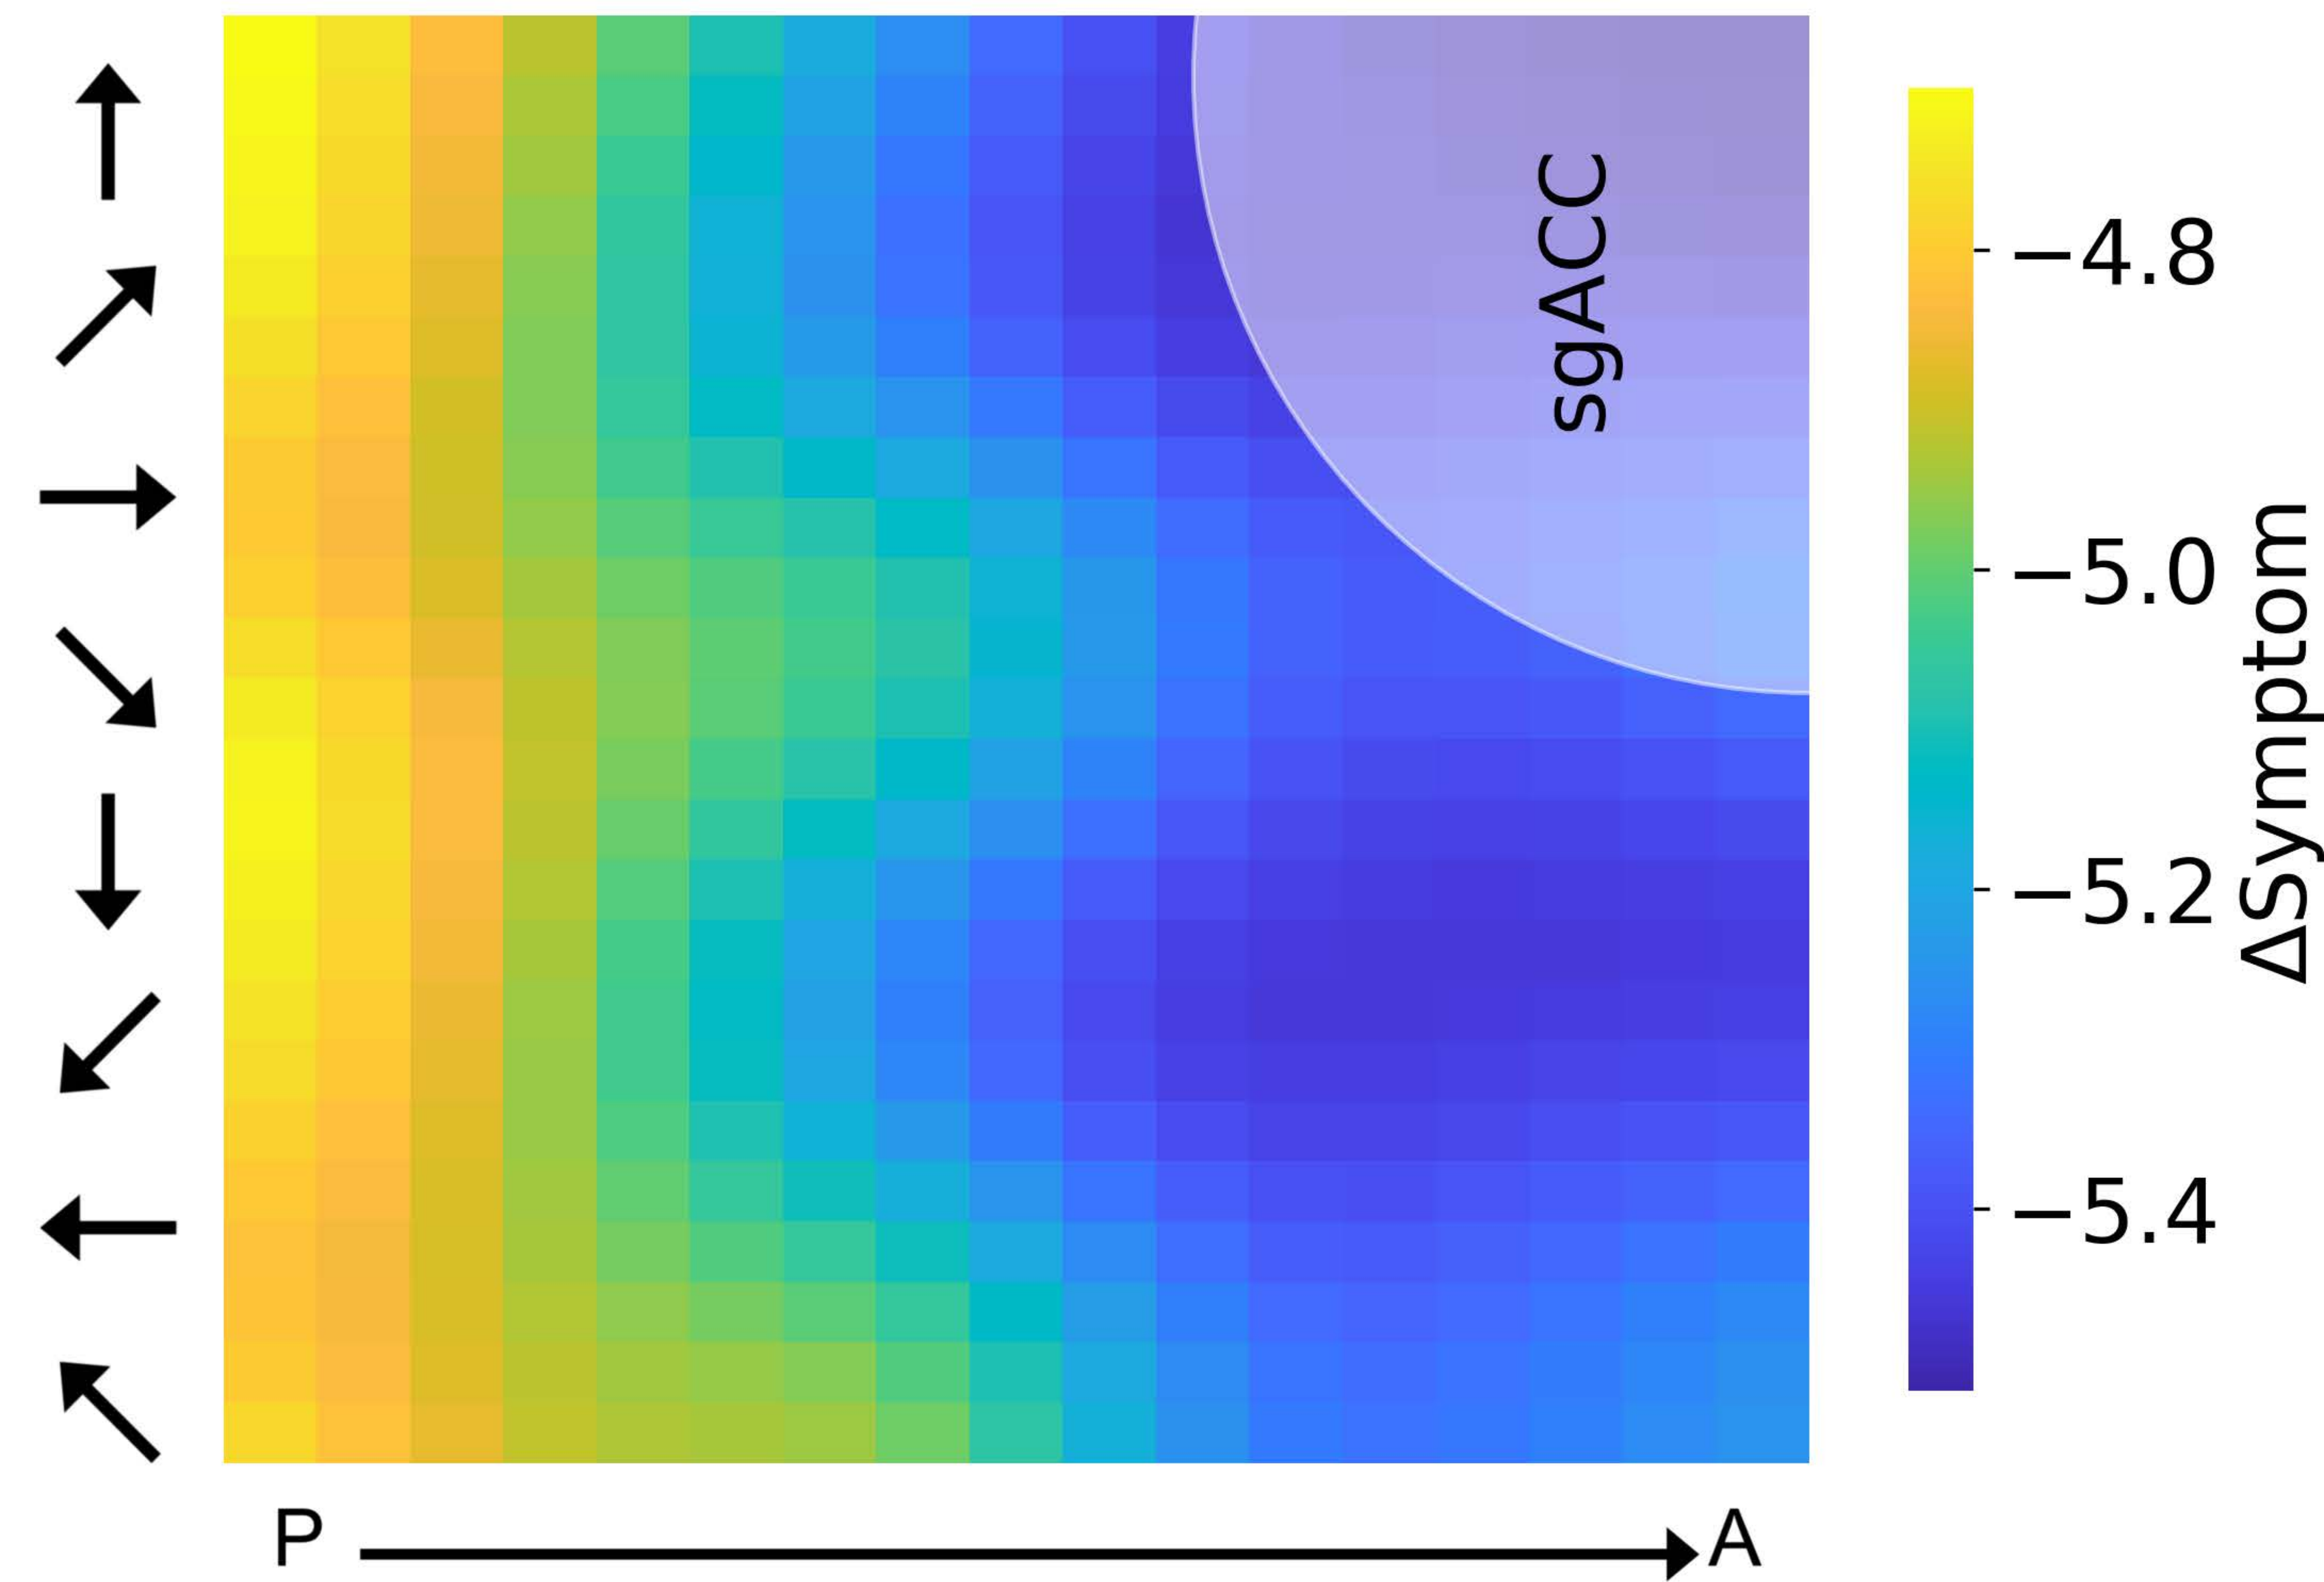



# NDARGR782ALD\_hamd\_left\_dlpfc

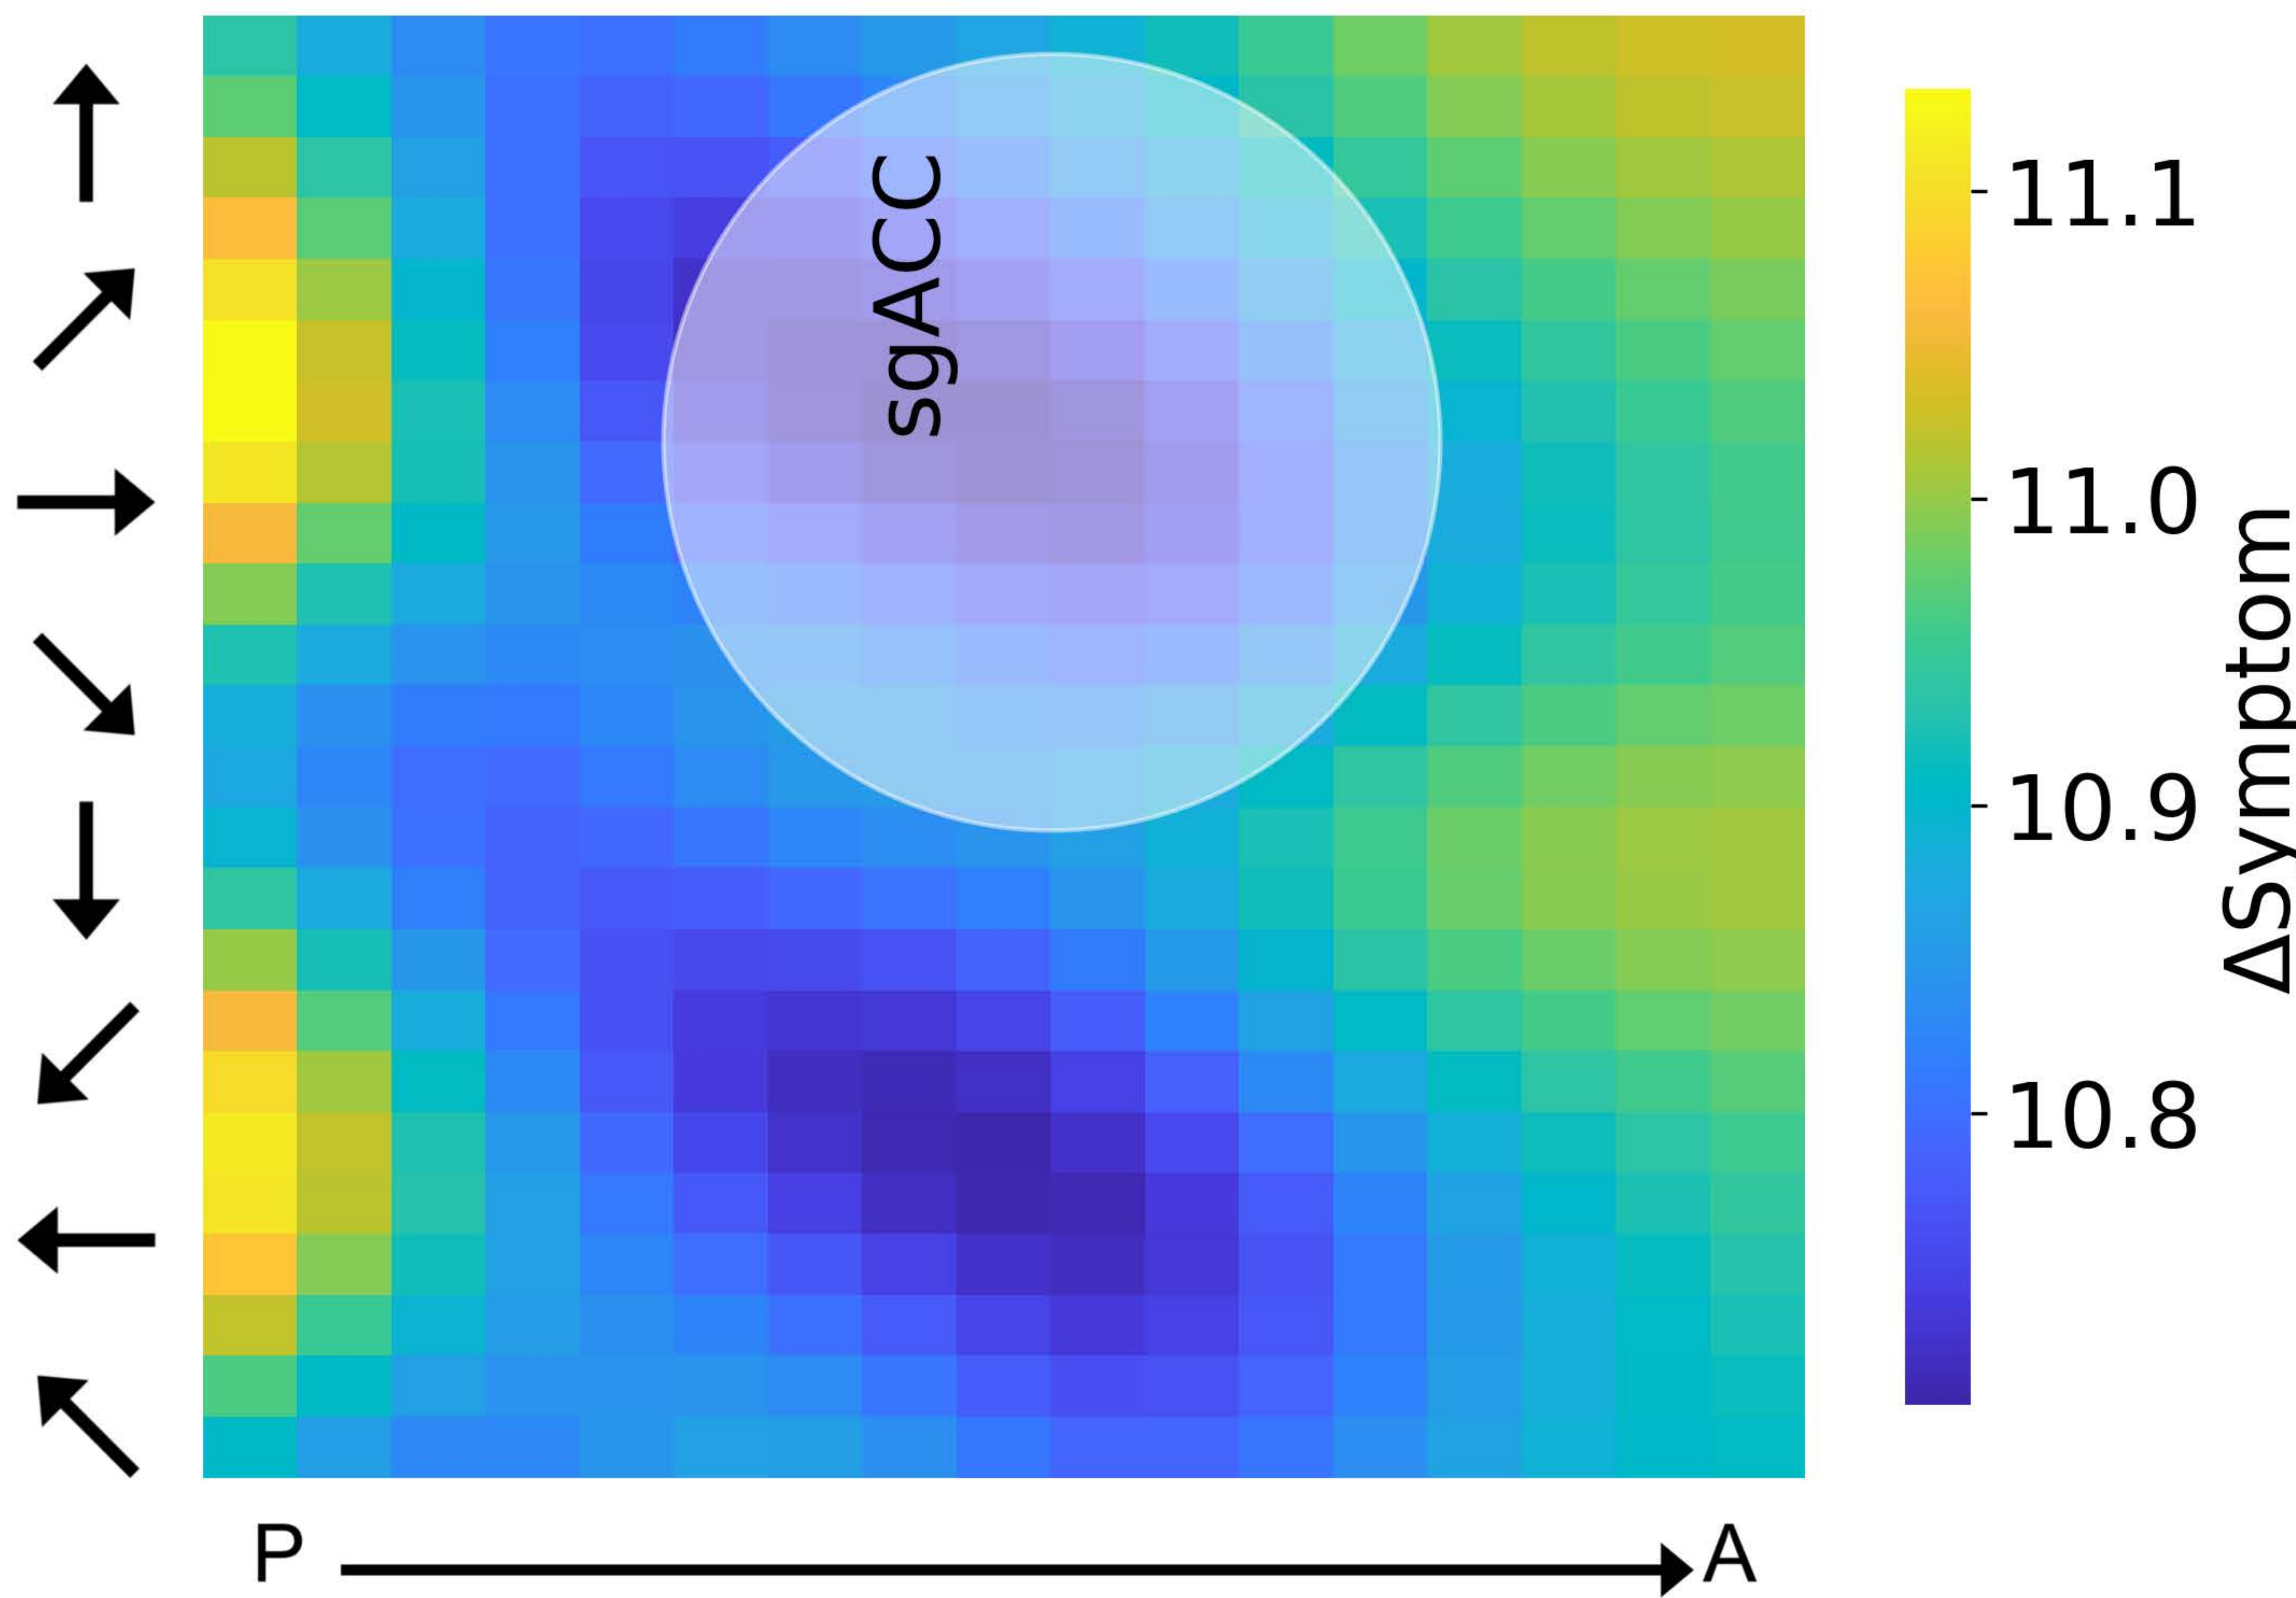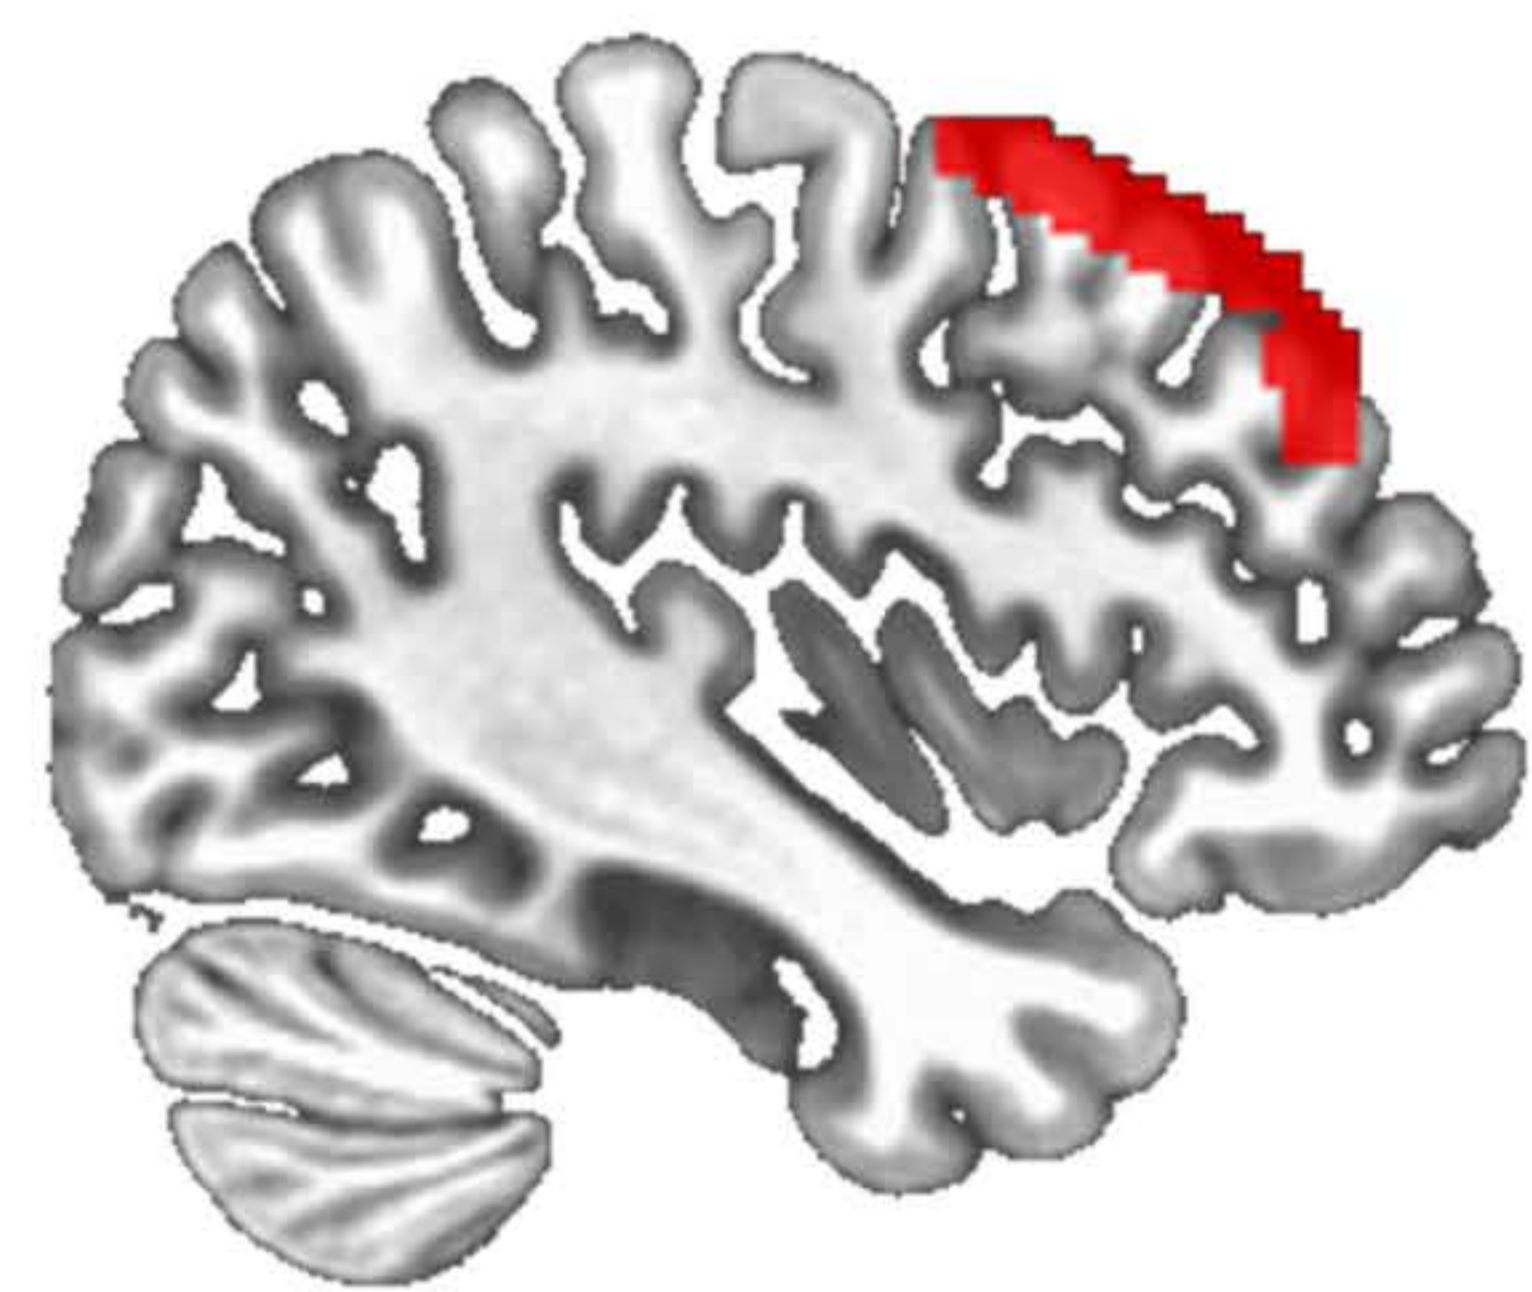



# INDARHA109LH7\_hamd\_left\_dlpfc

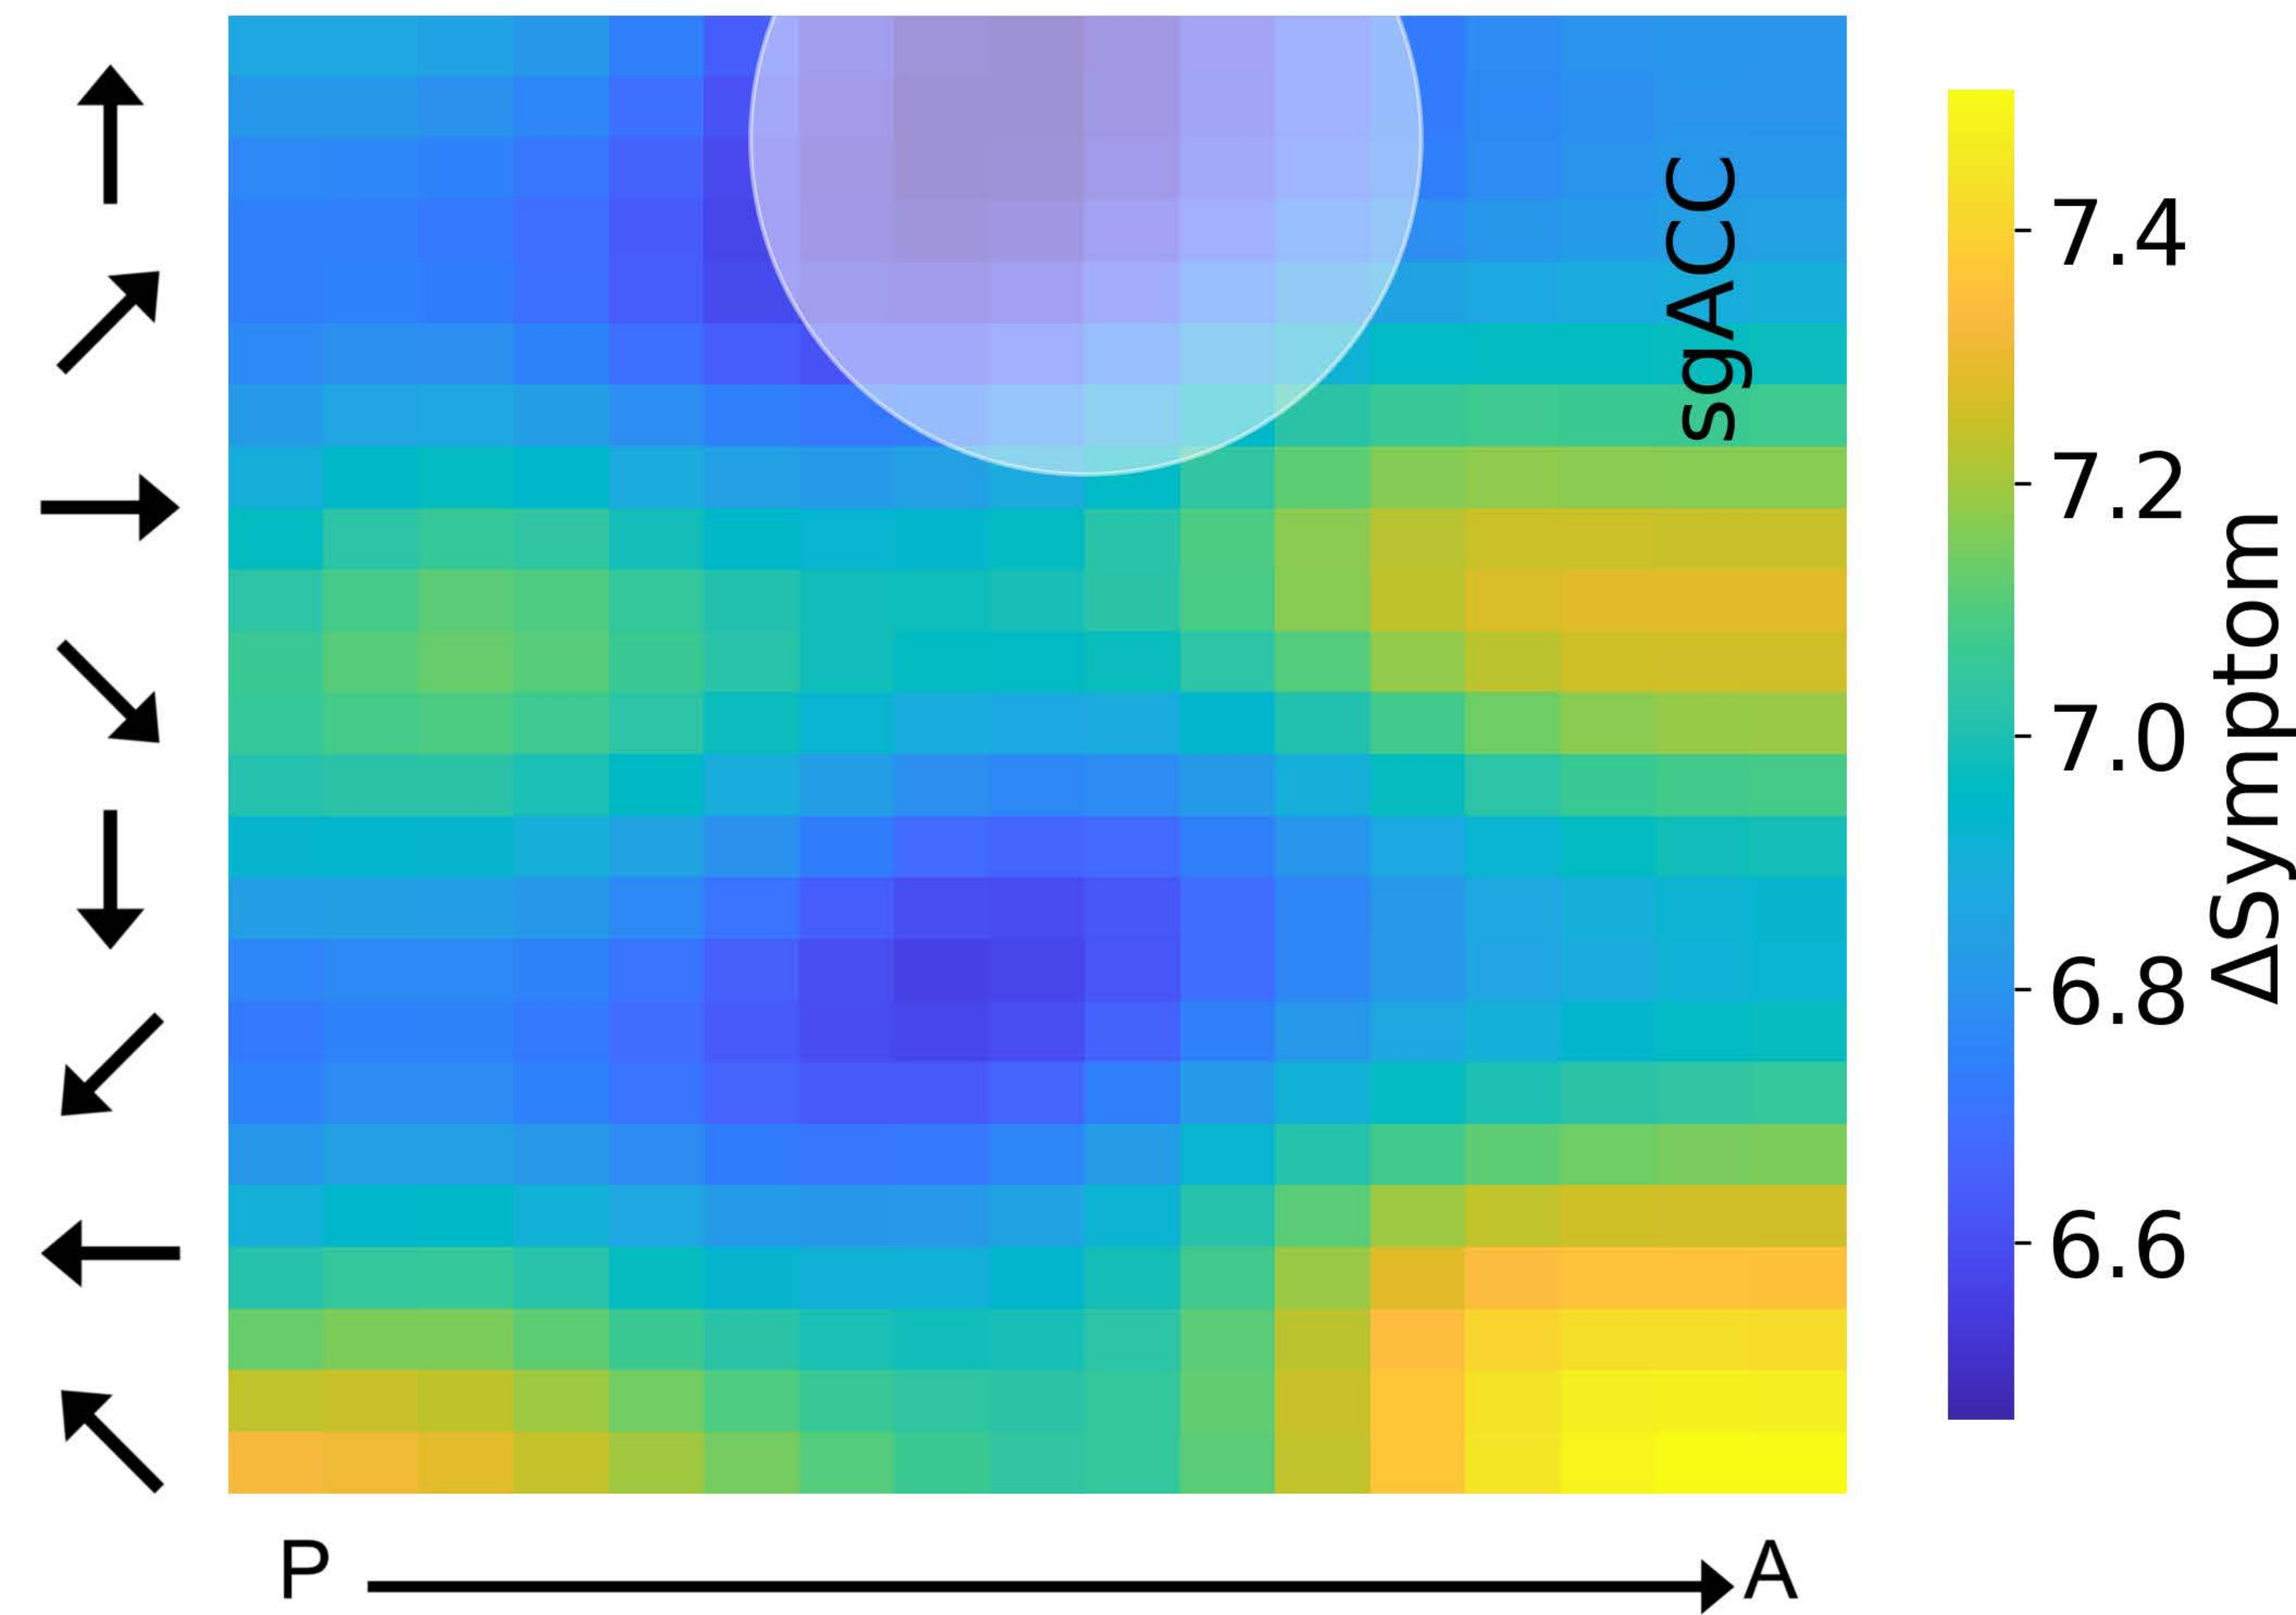



# NDARHR981AP1\_hamd\_left\_dlpfc

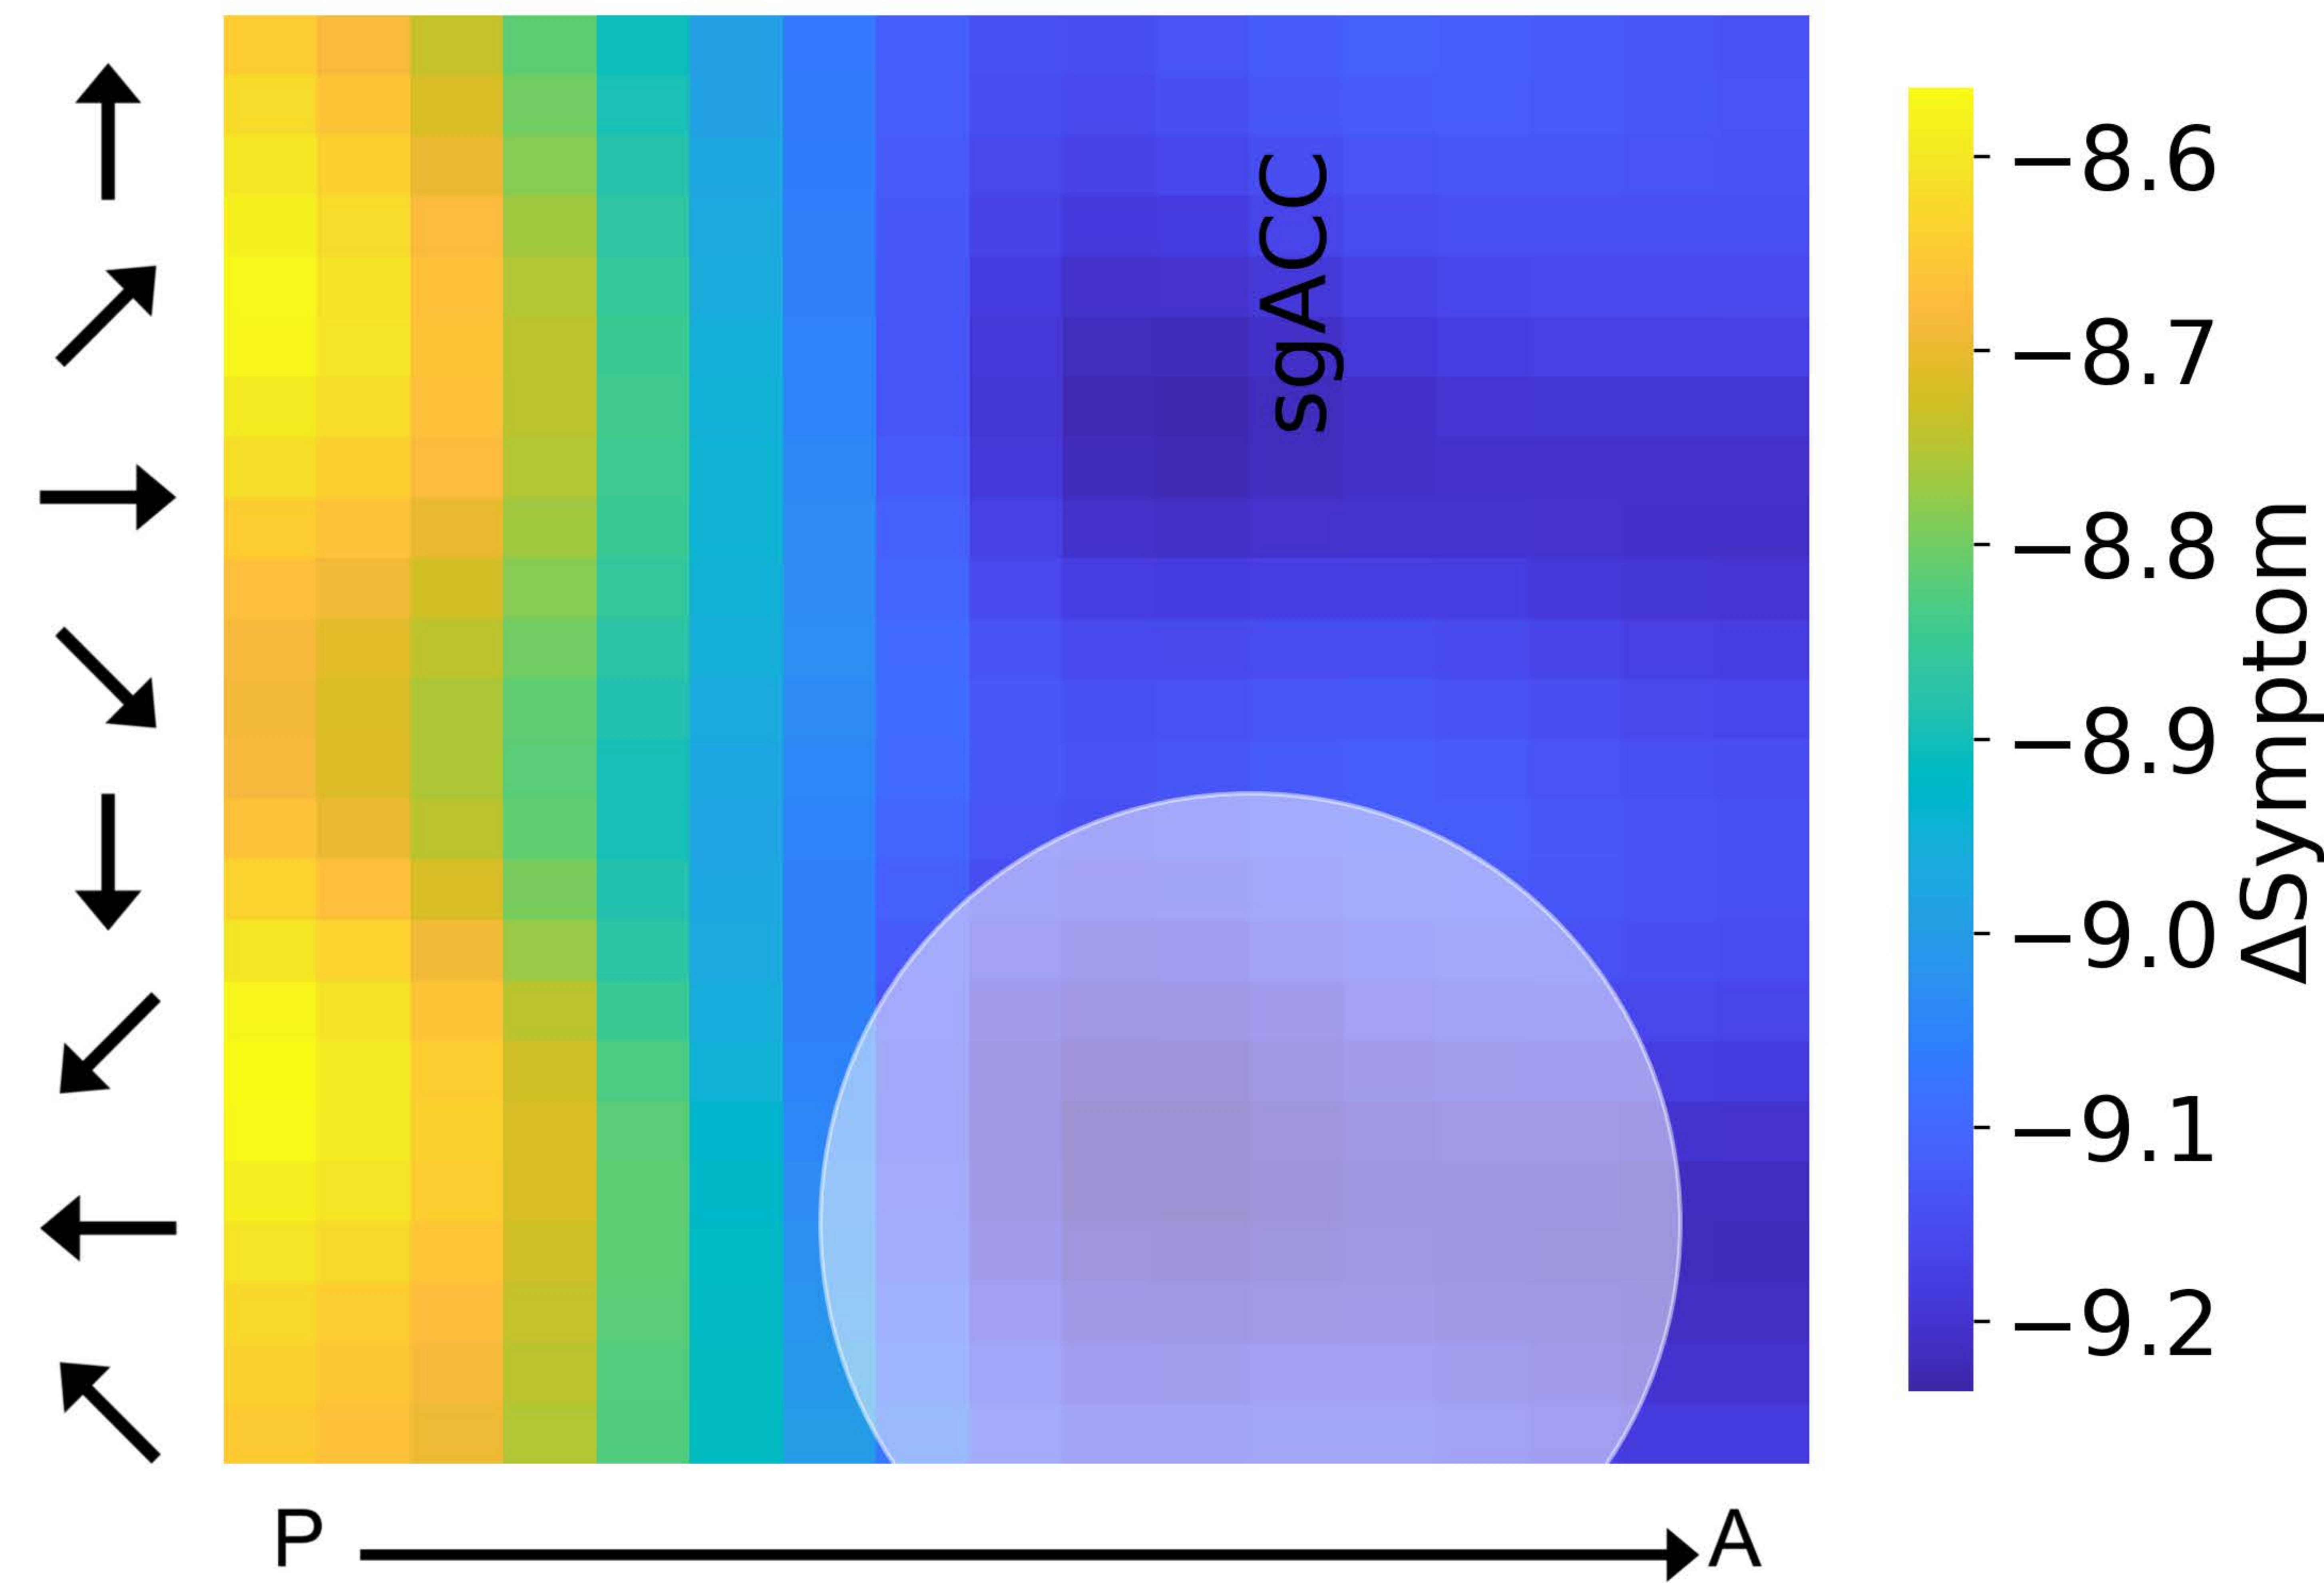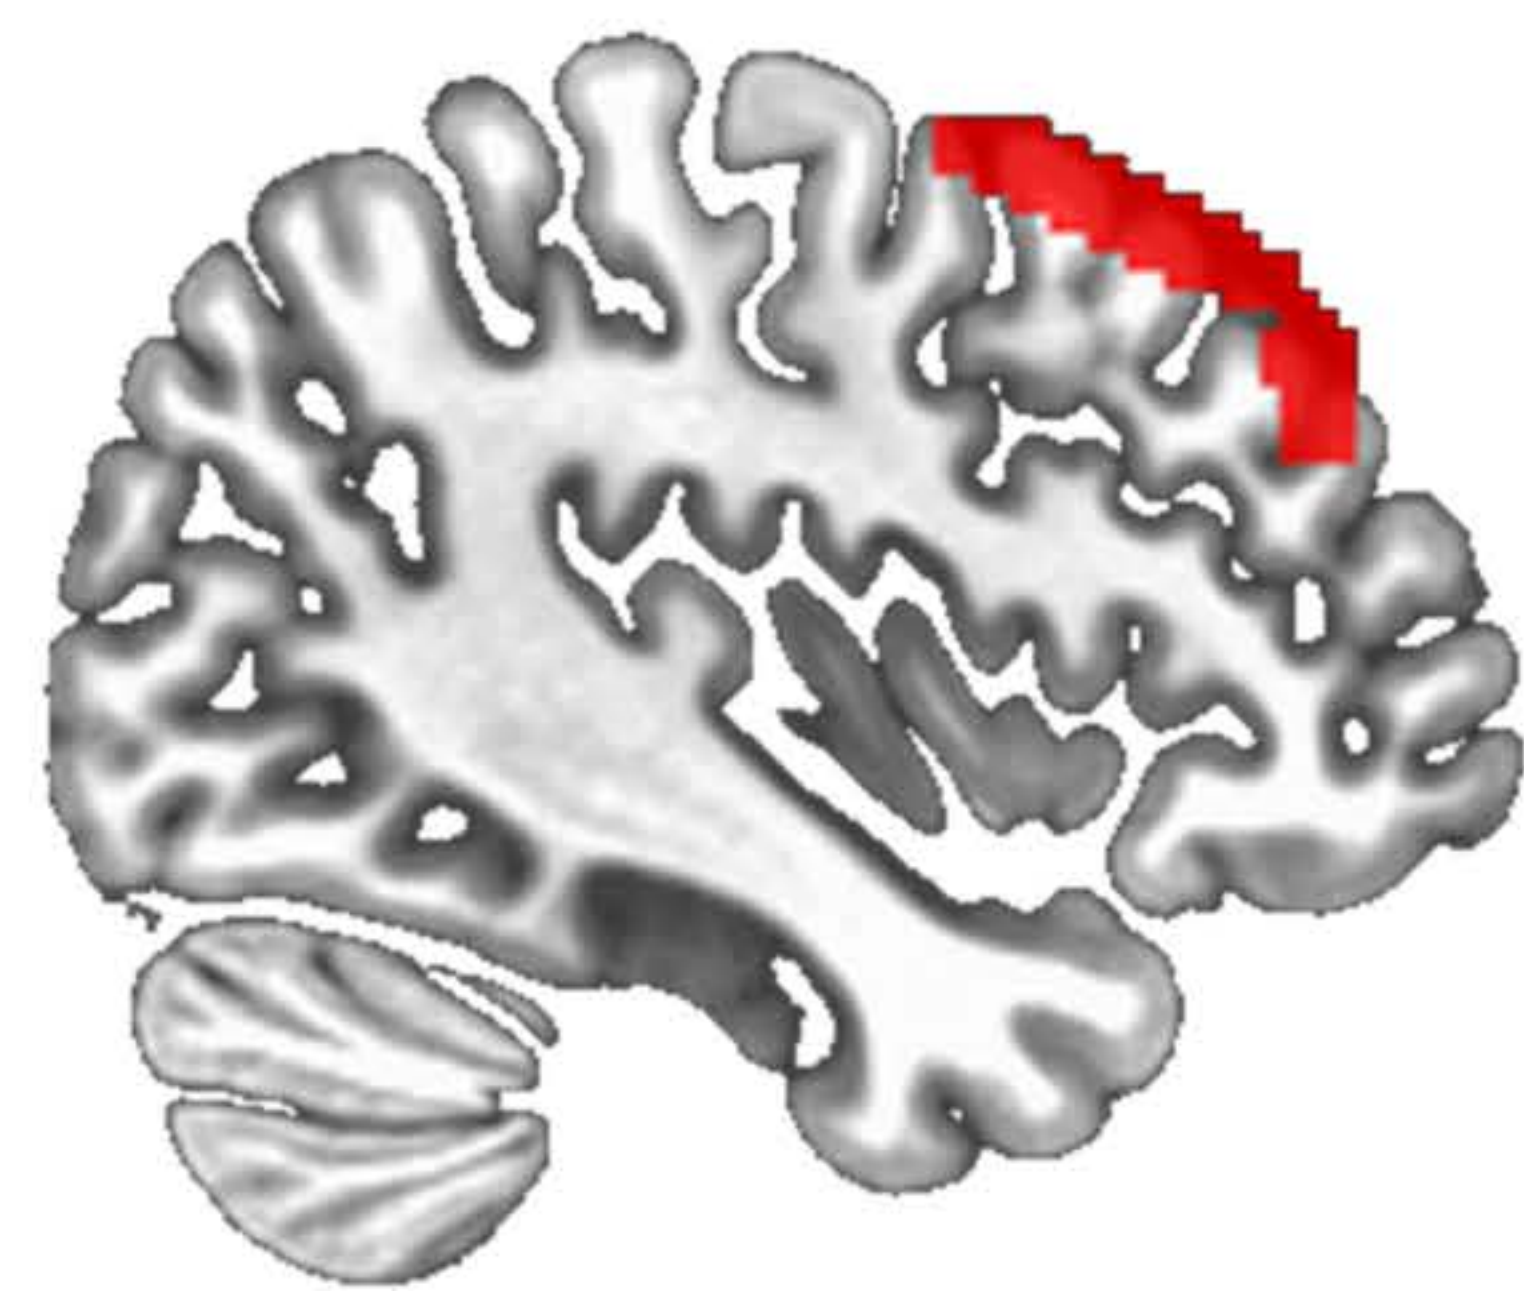



# INDARHX487CT9\_hamd\_left\_dlpfc

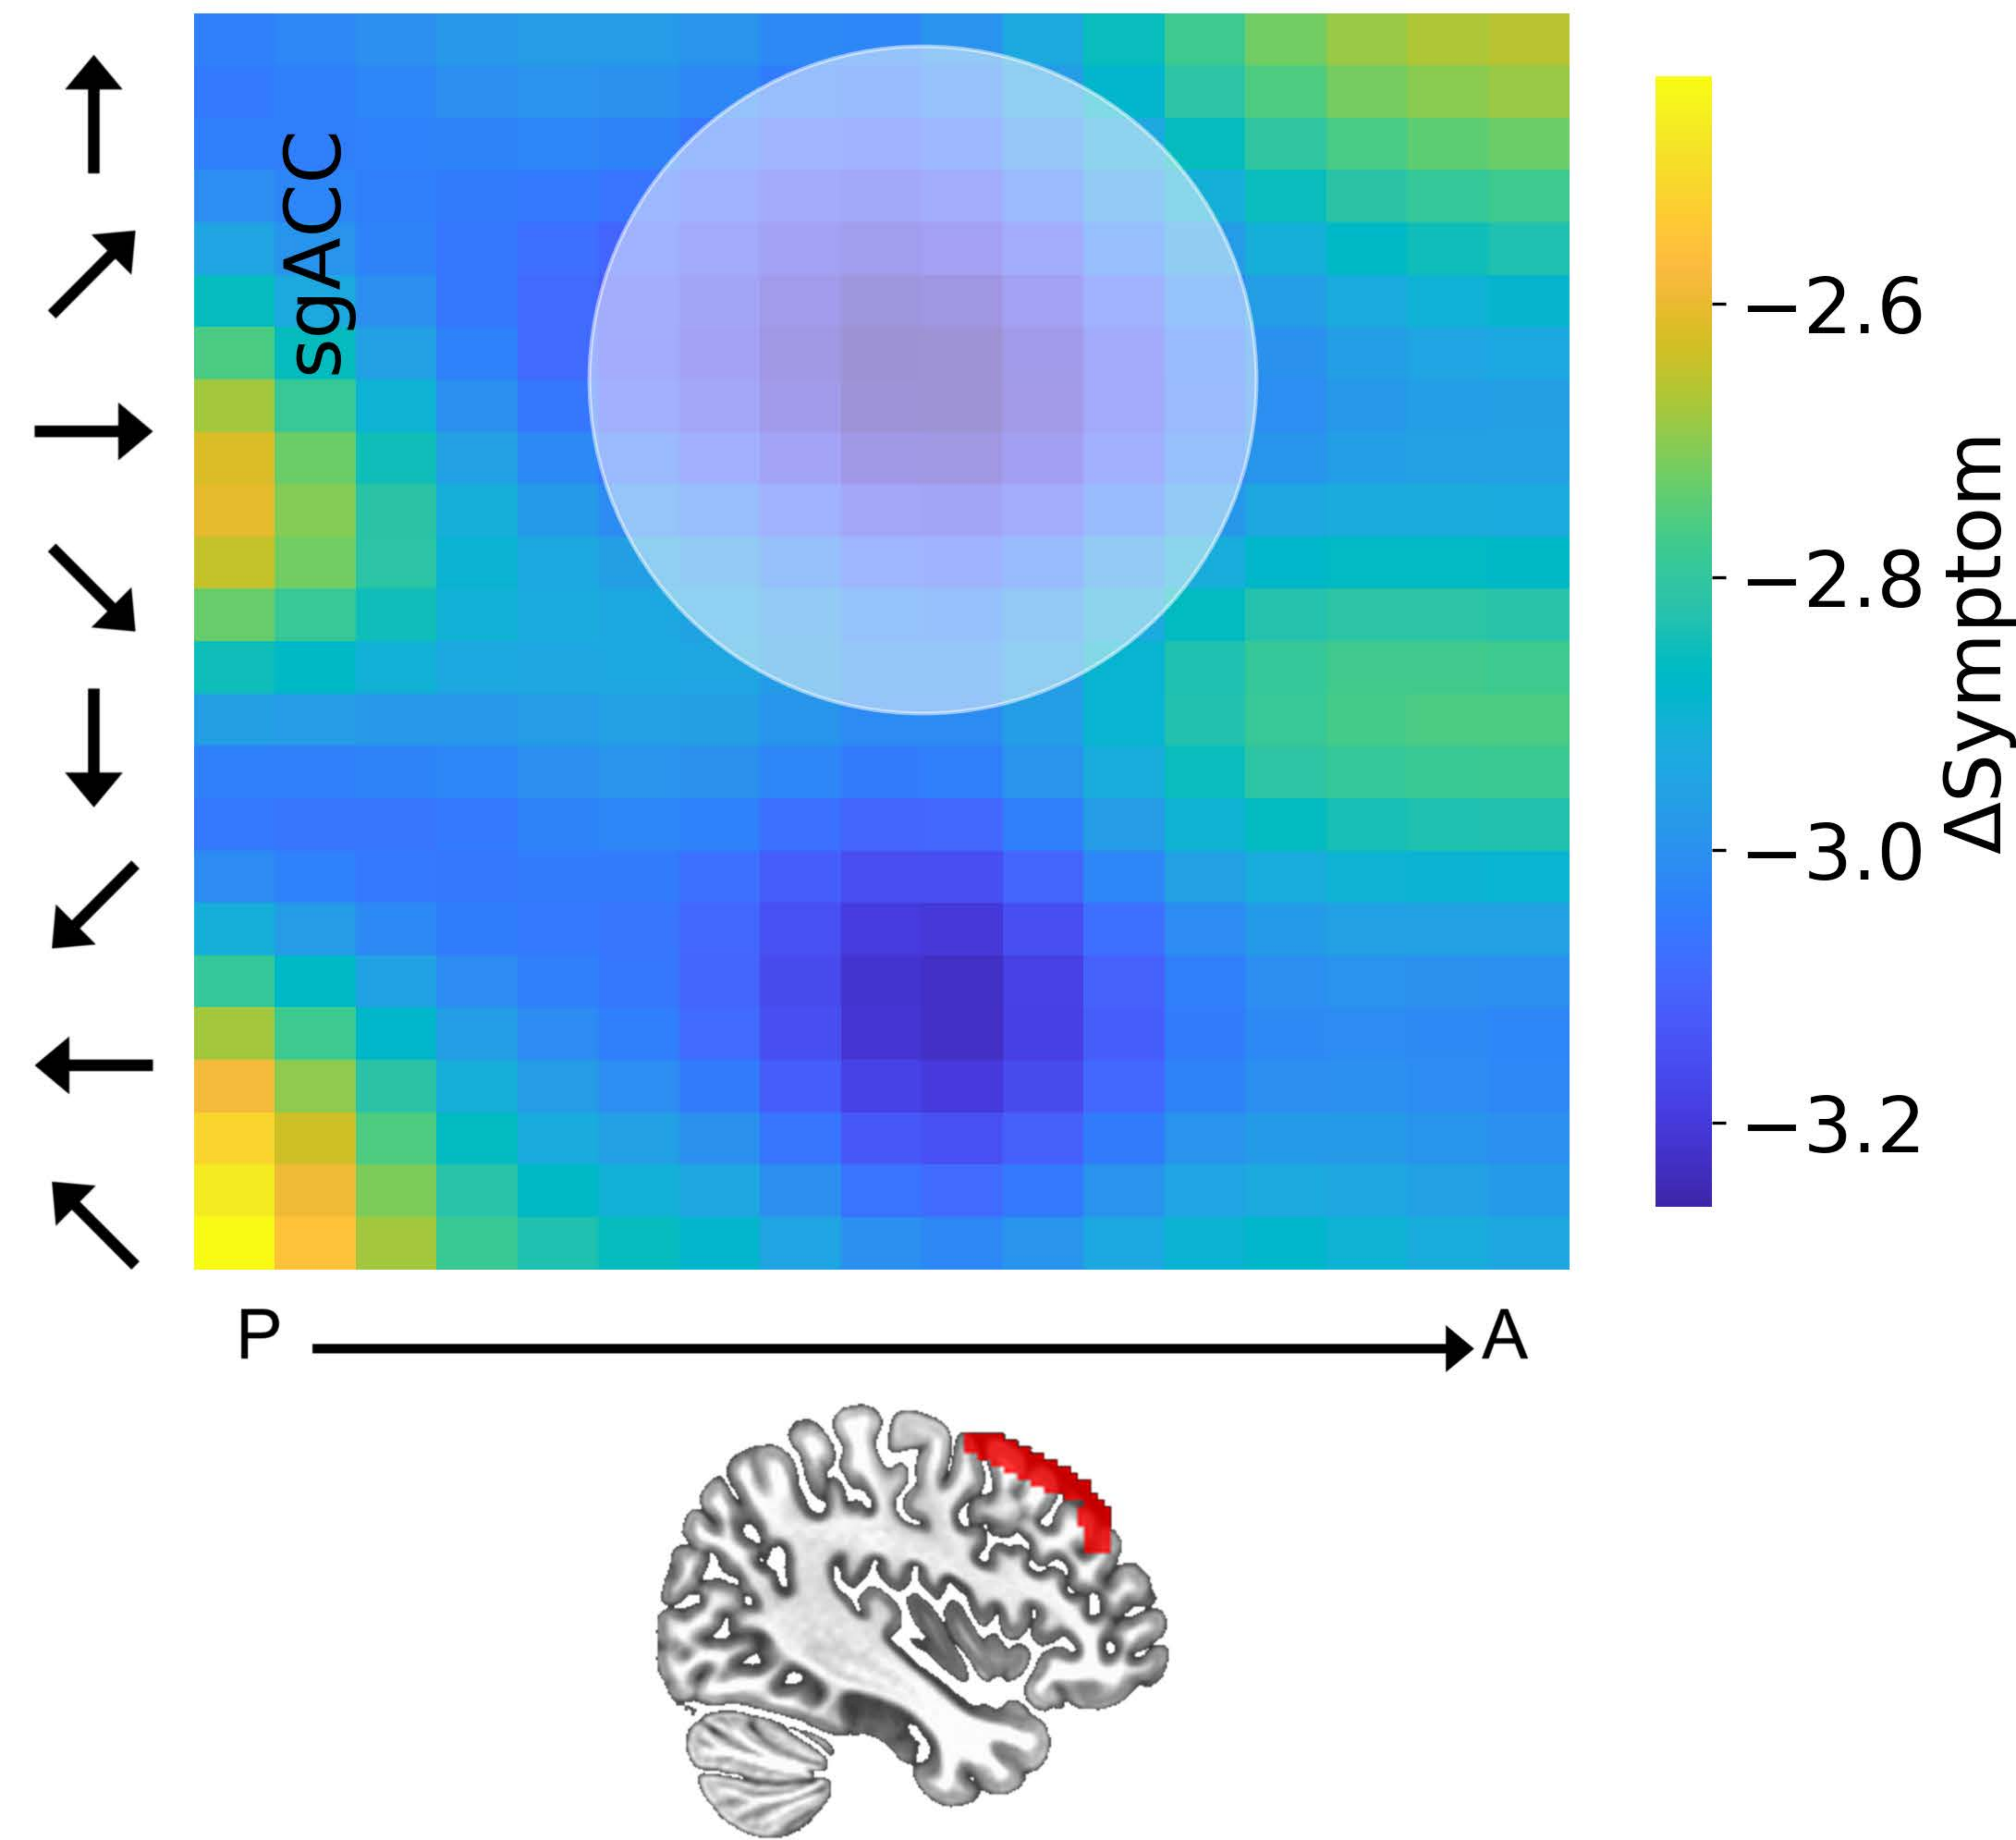



# INDARHZ301NUW\_hamd\_left\_dlpfc

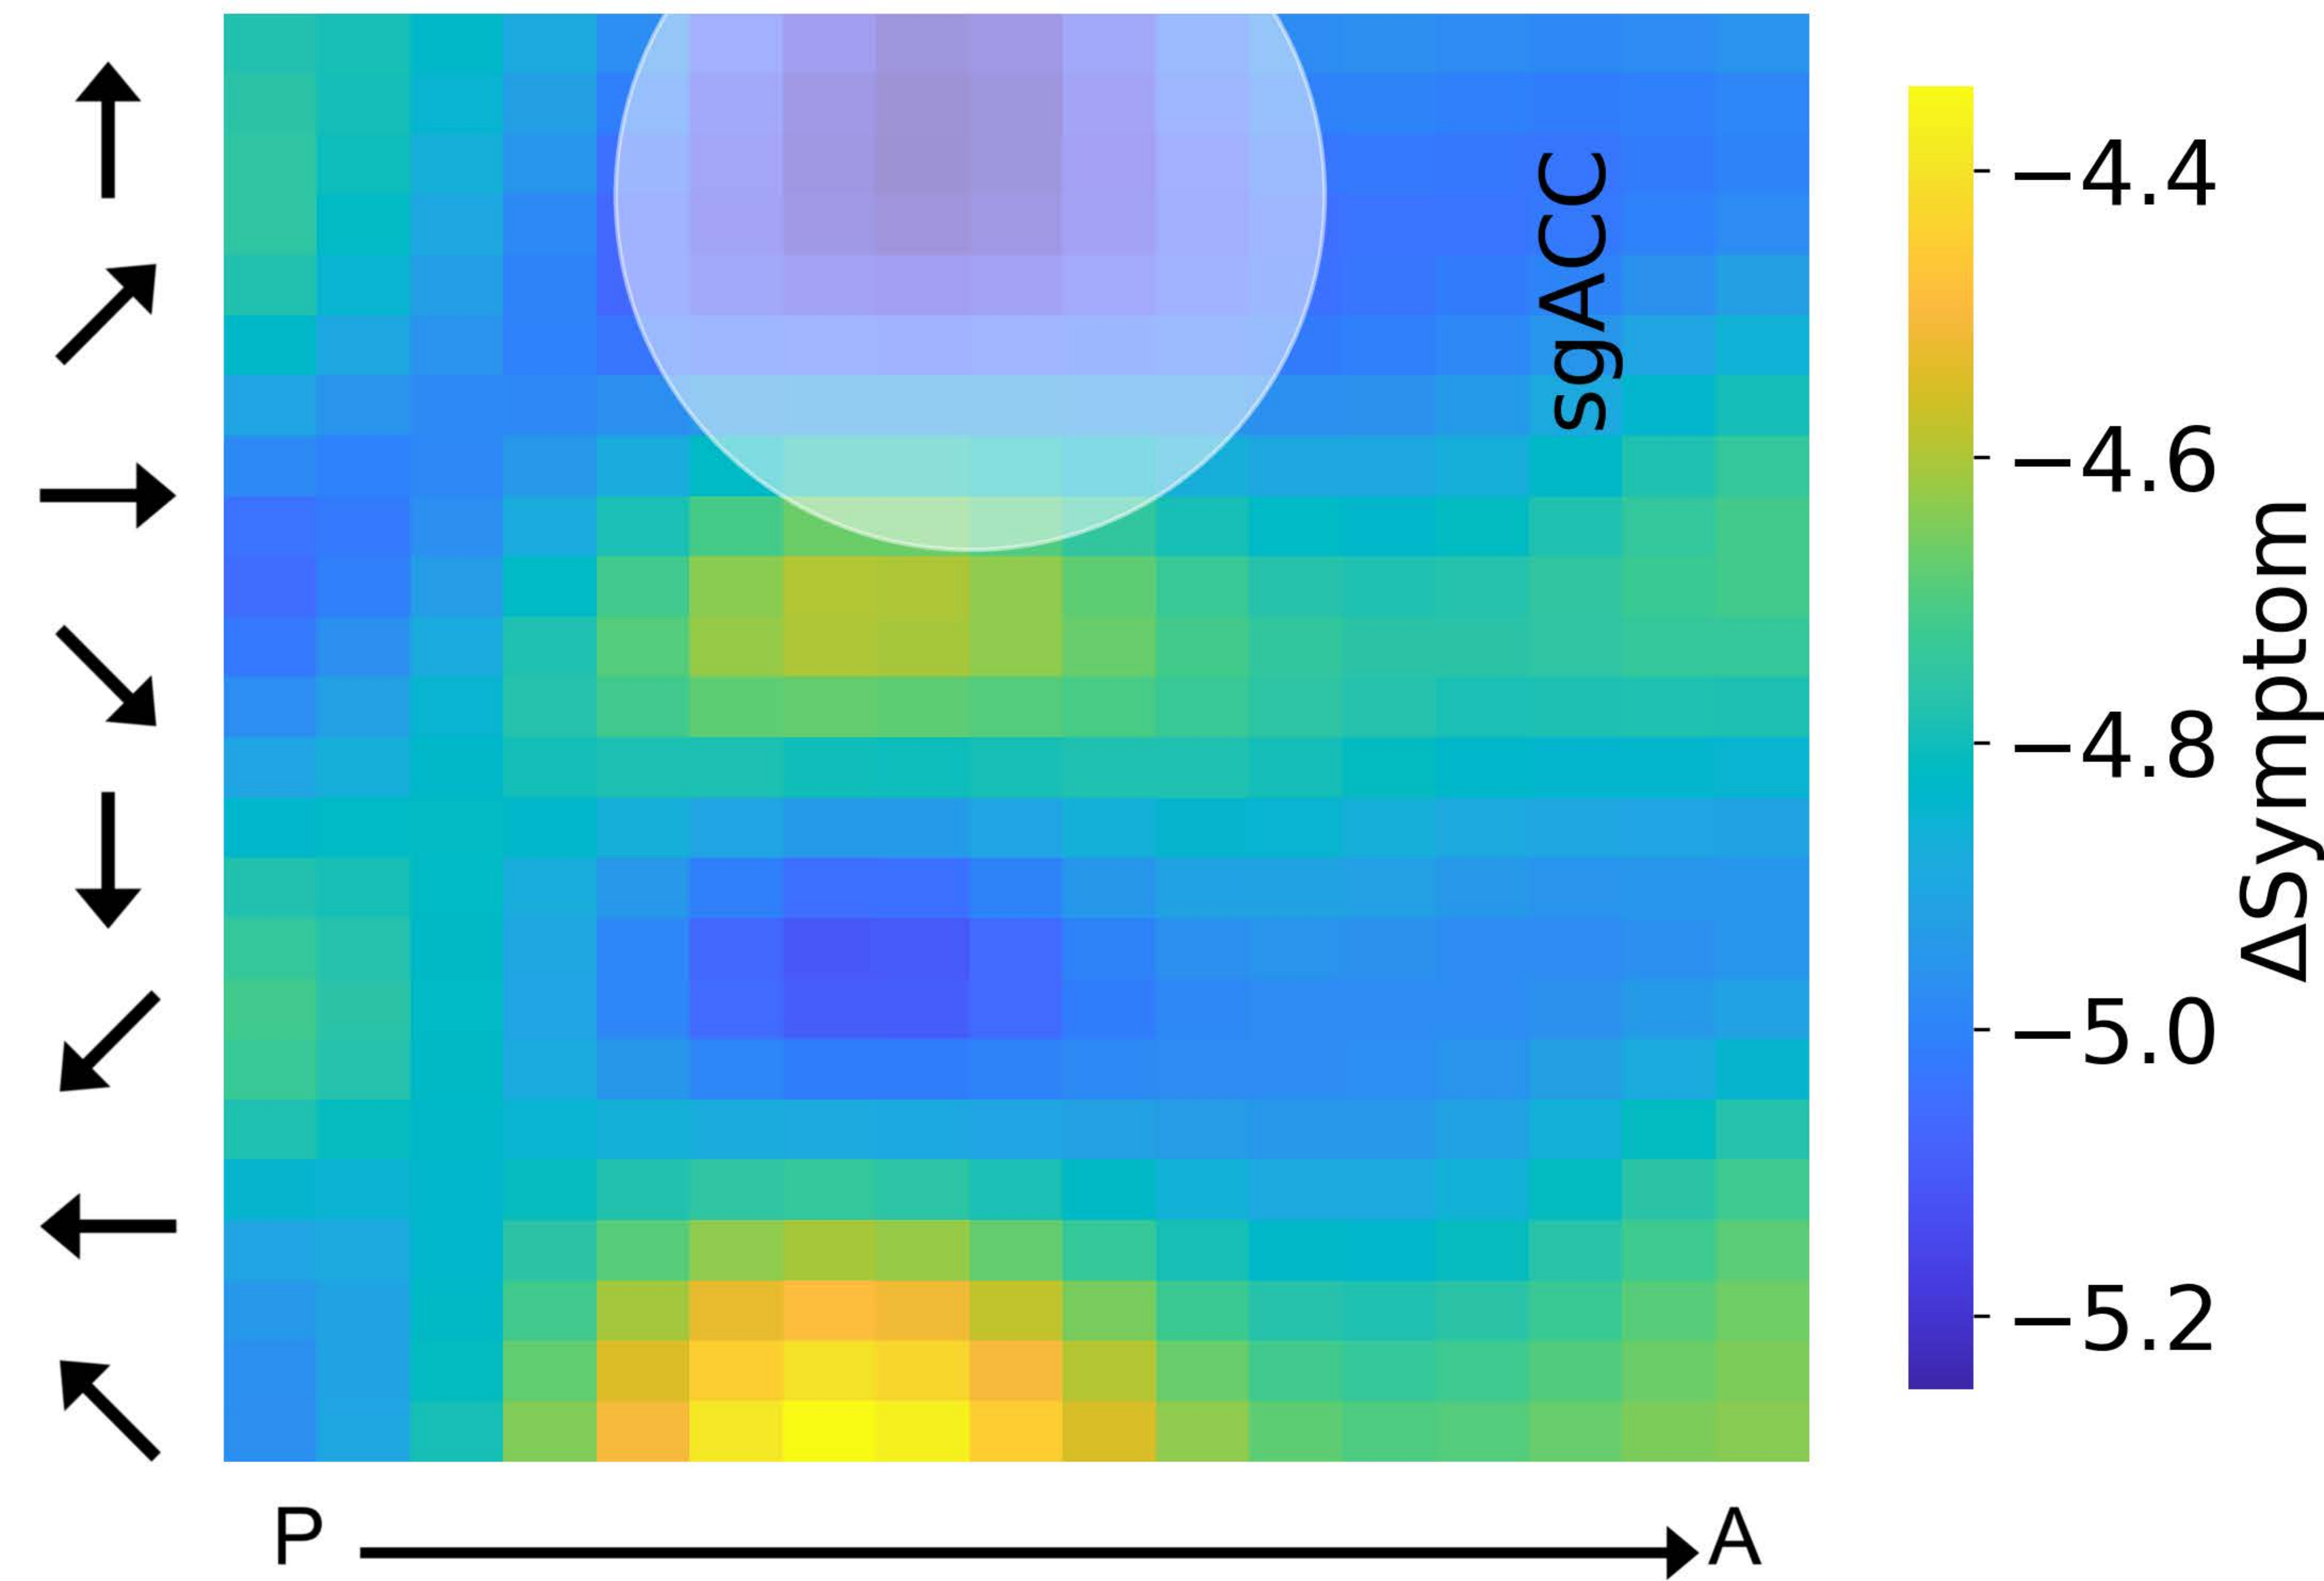



# INDARHZ662EPK\_hamd\_left\_dlpfc

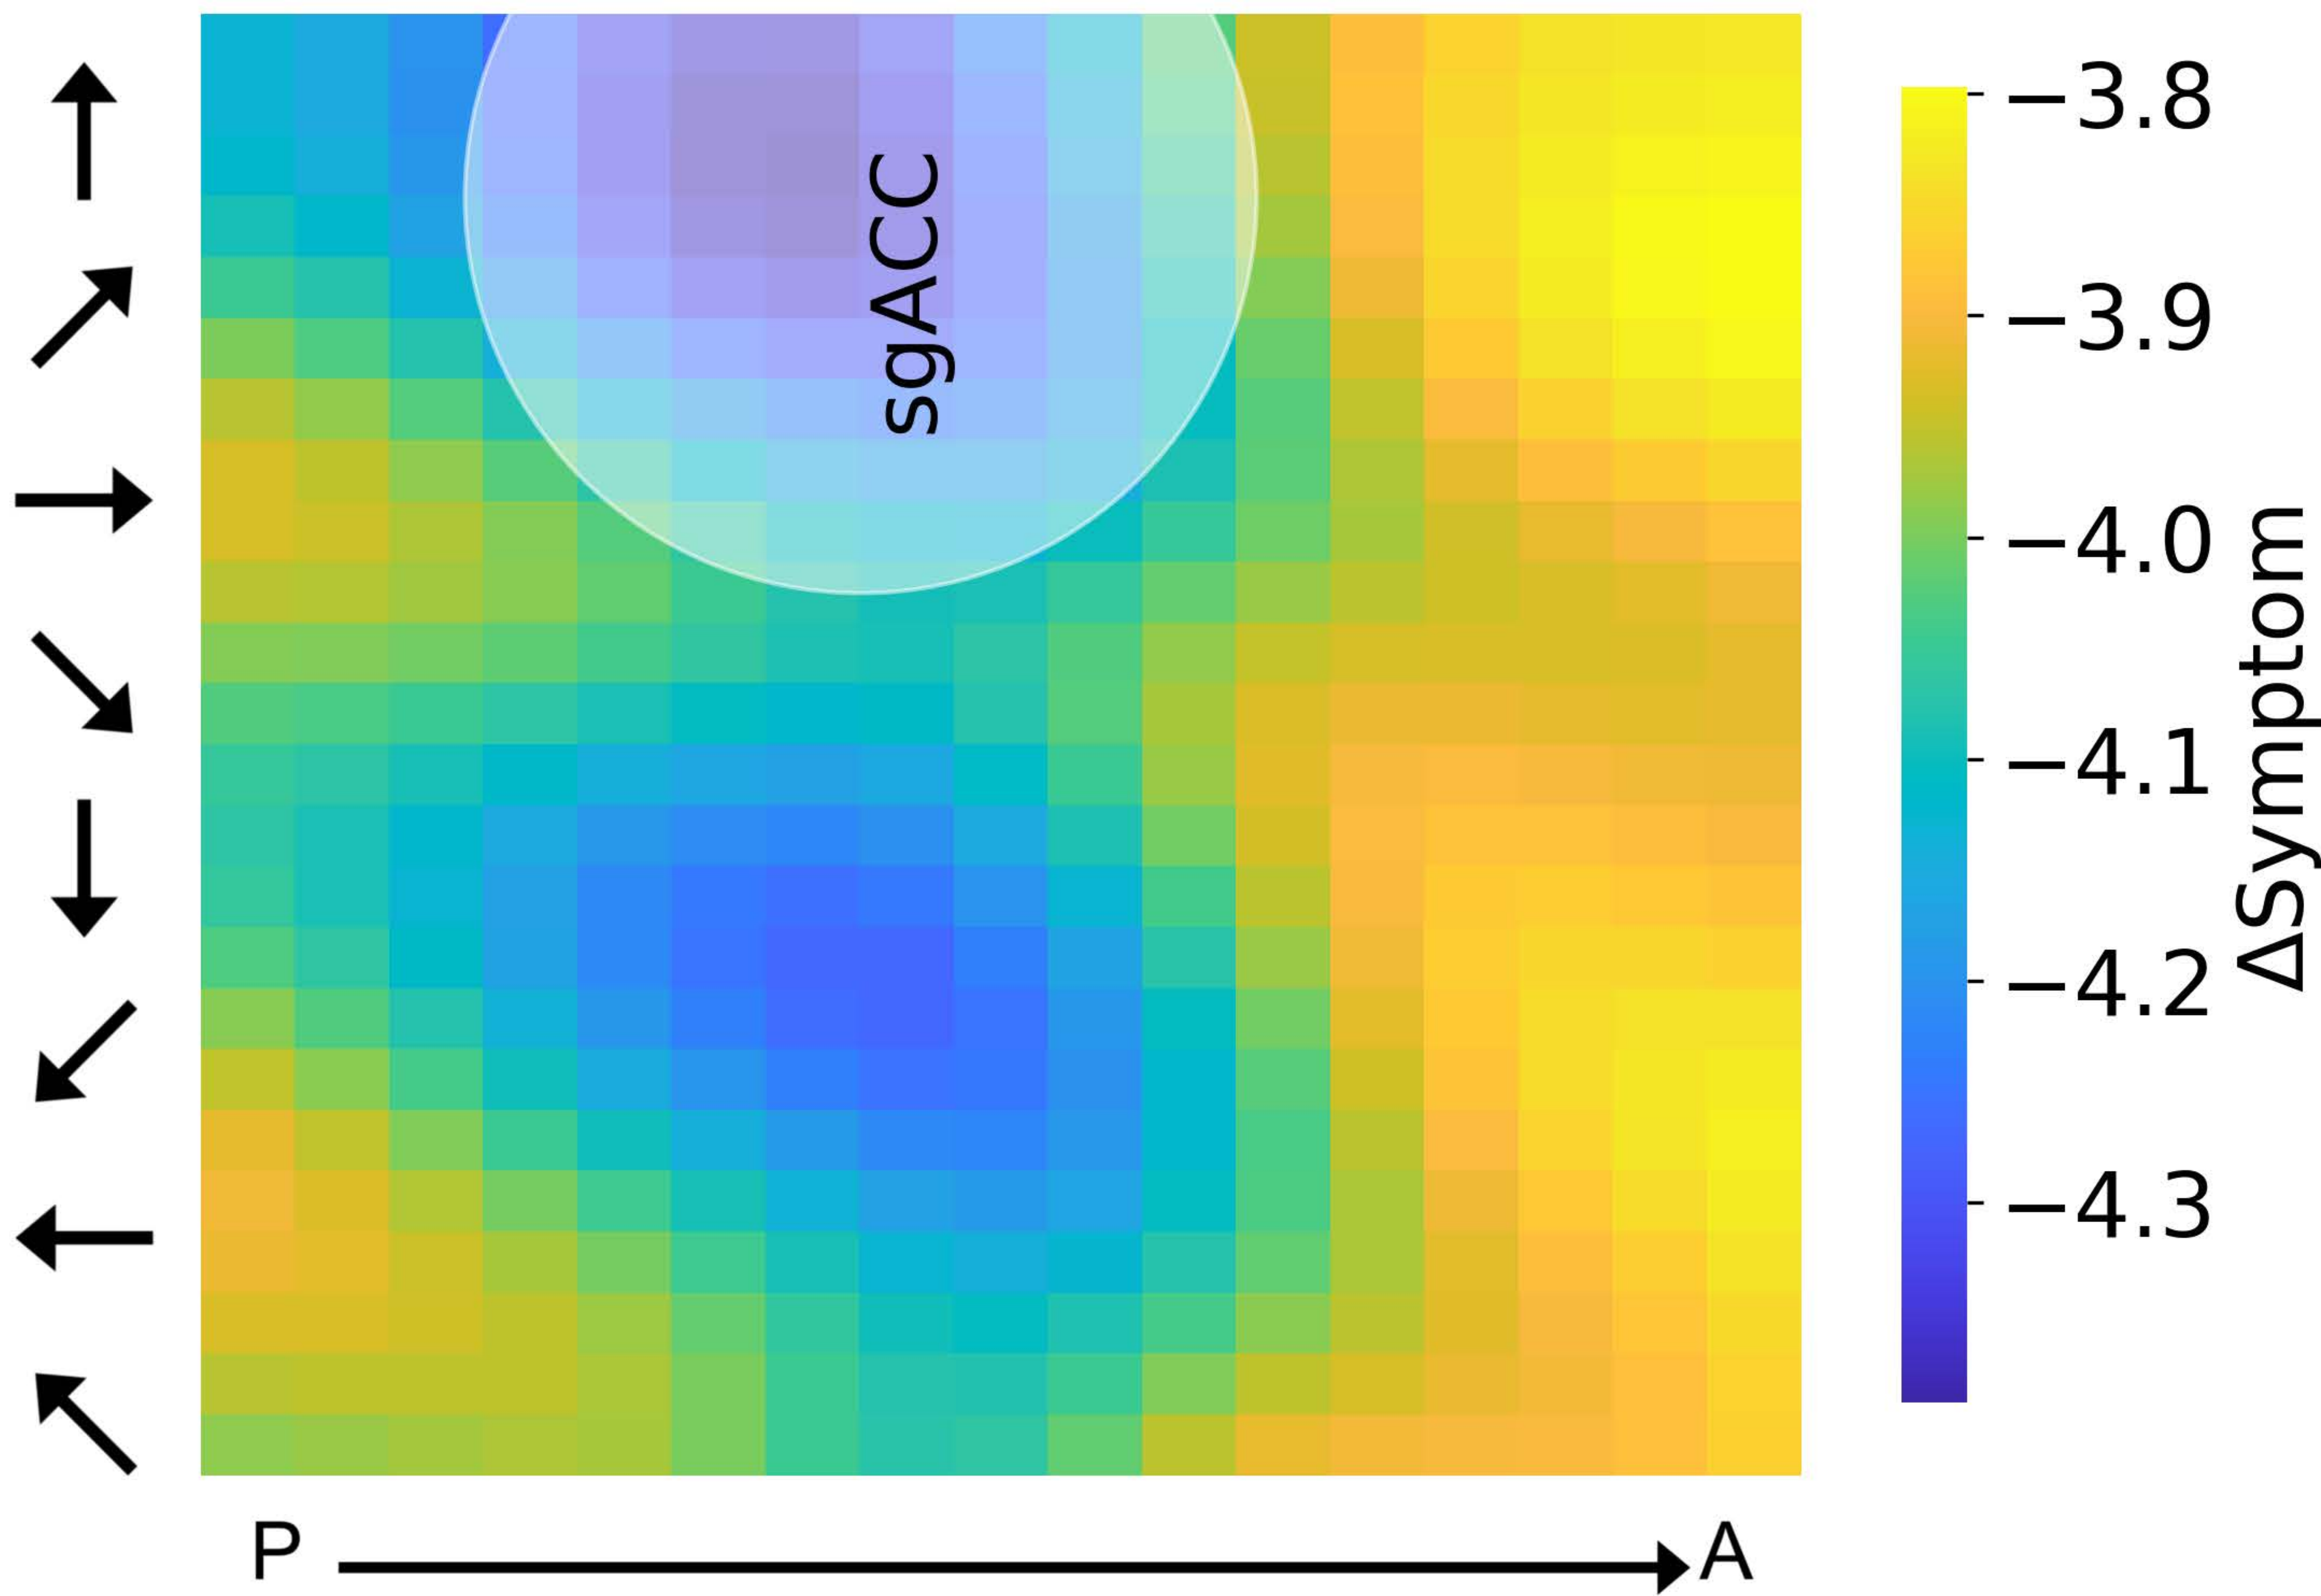



# INDARJD271PMF\_hamd\_left\_dlpfc

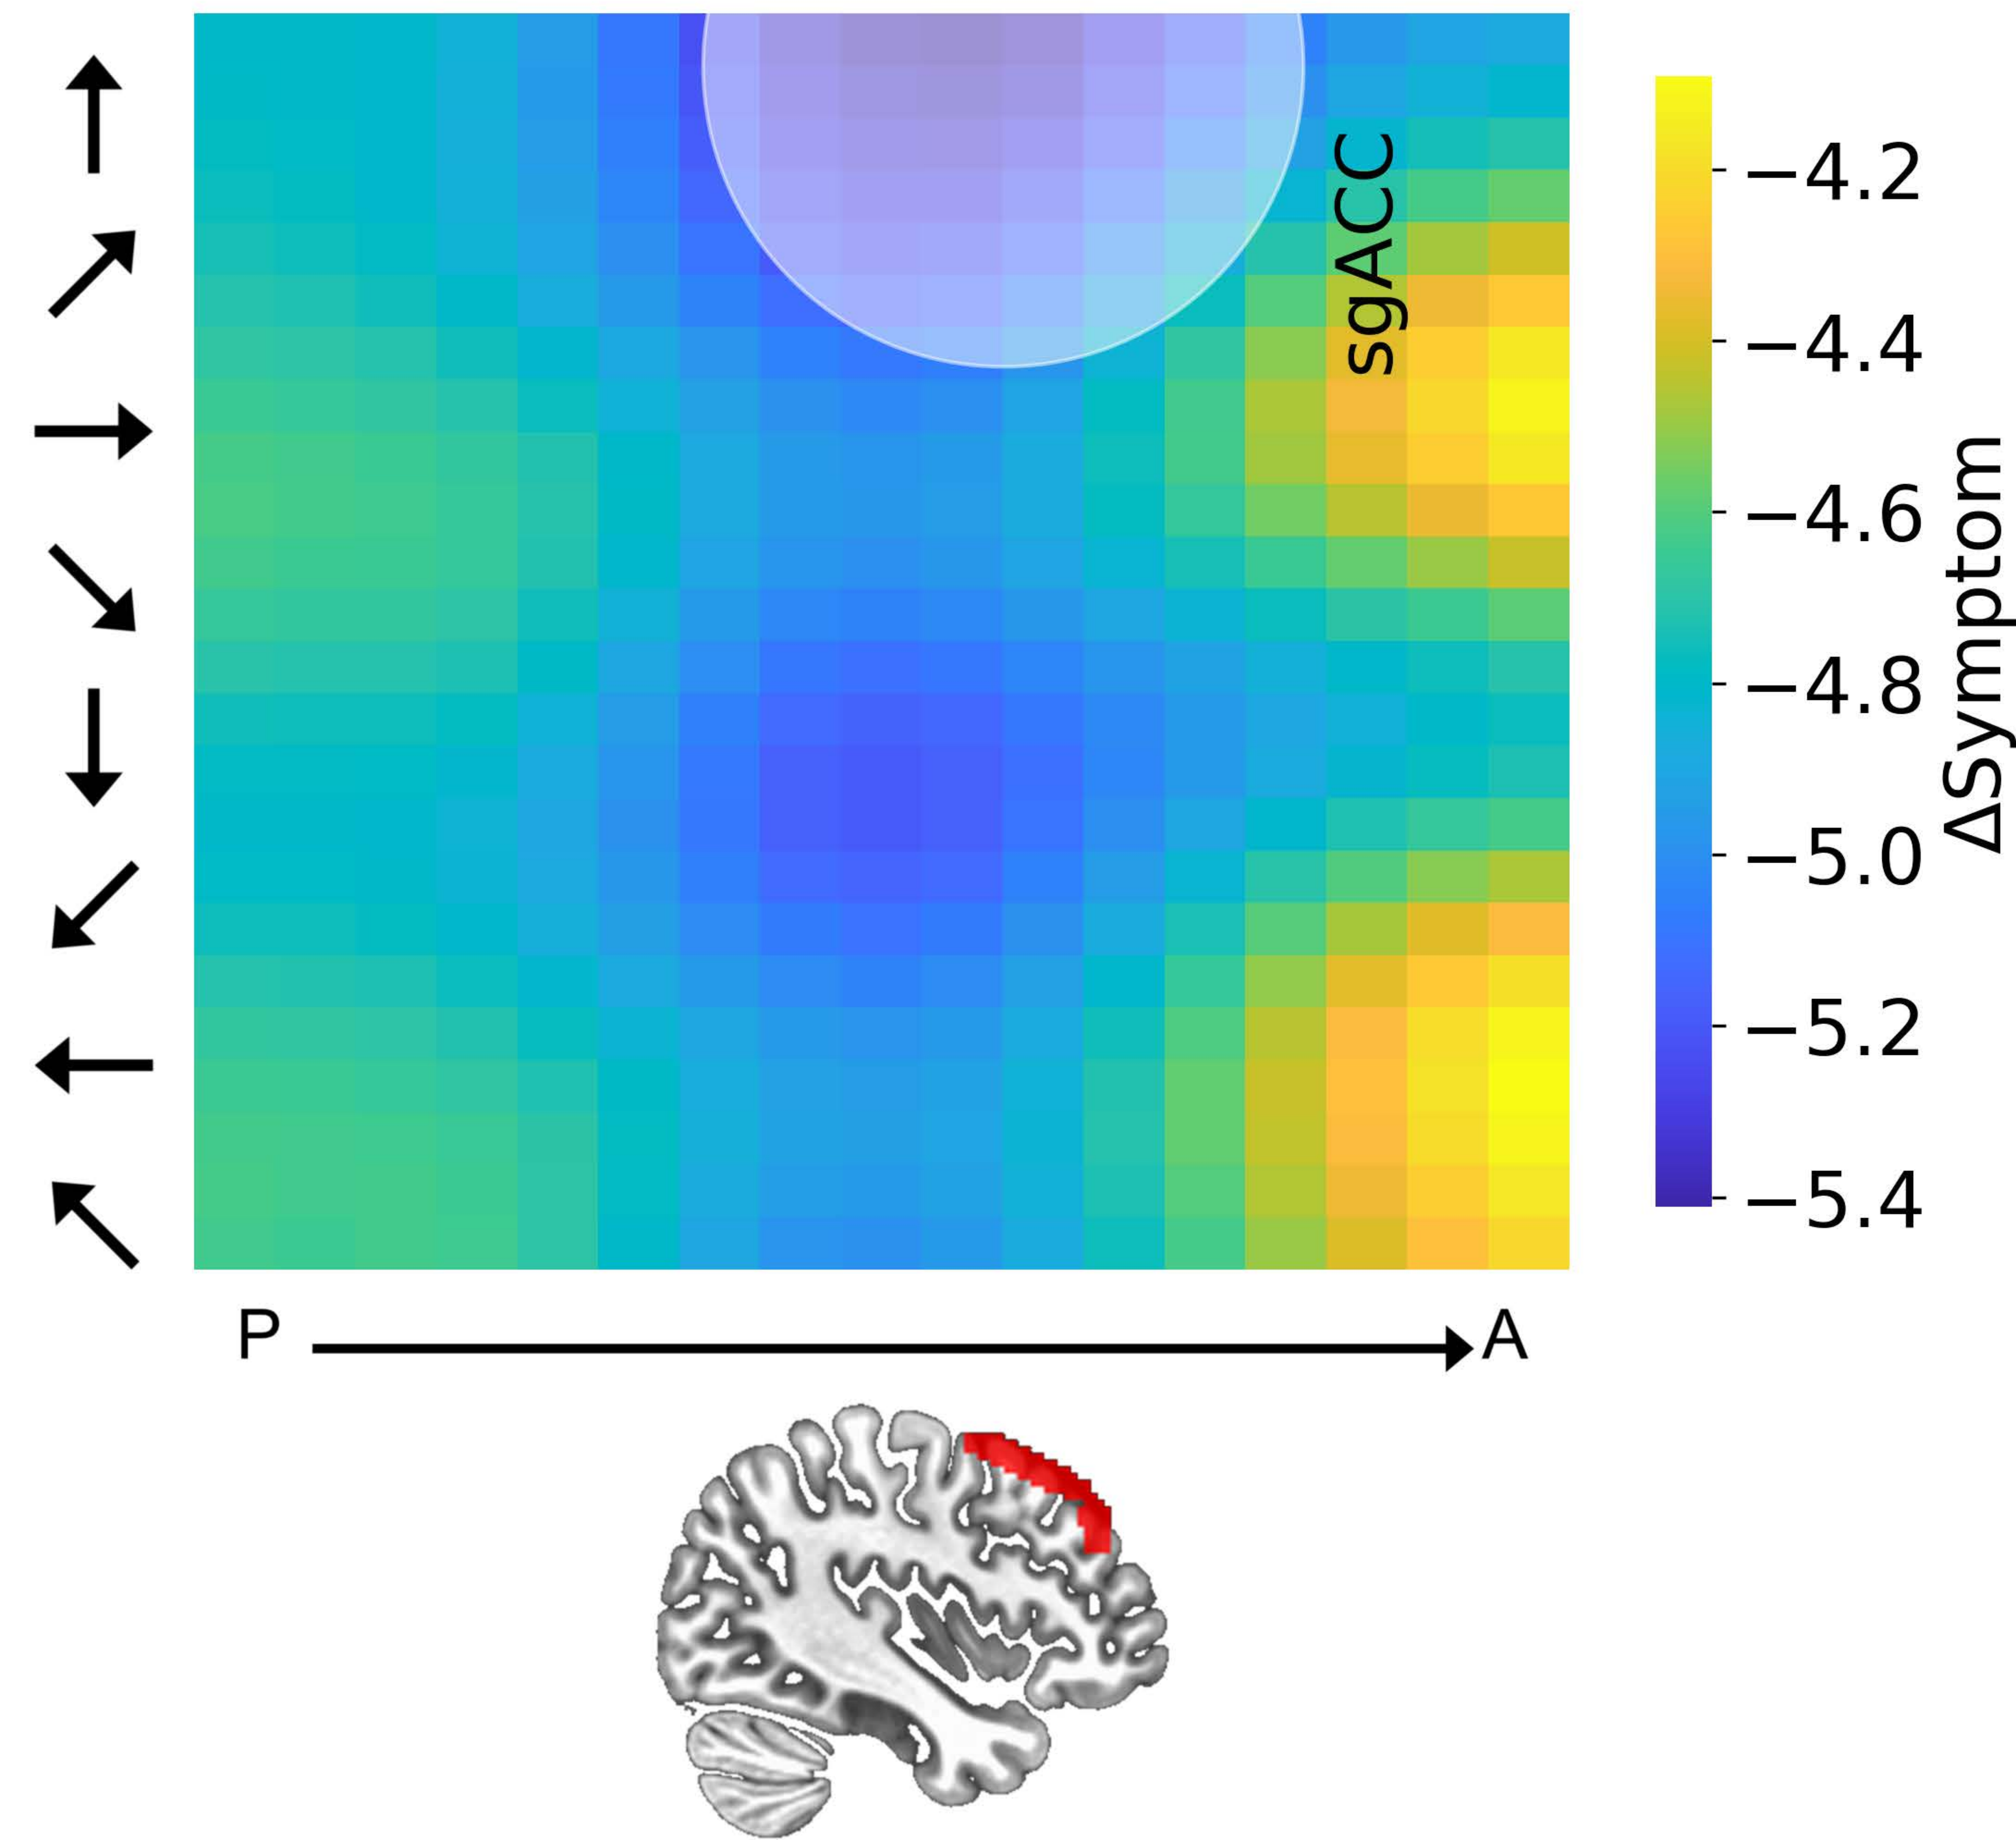



# INDARJD548GTC\_hamd\_left\_dlpfc

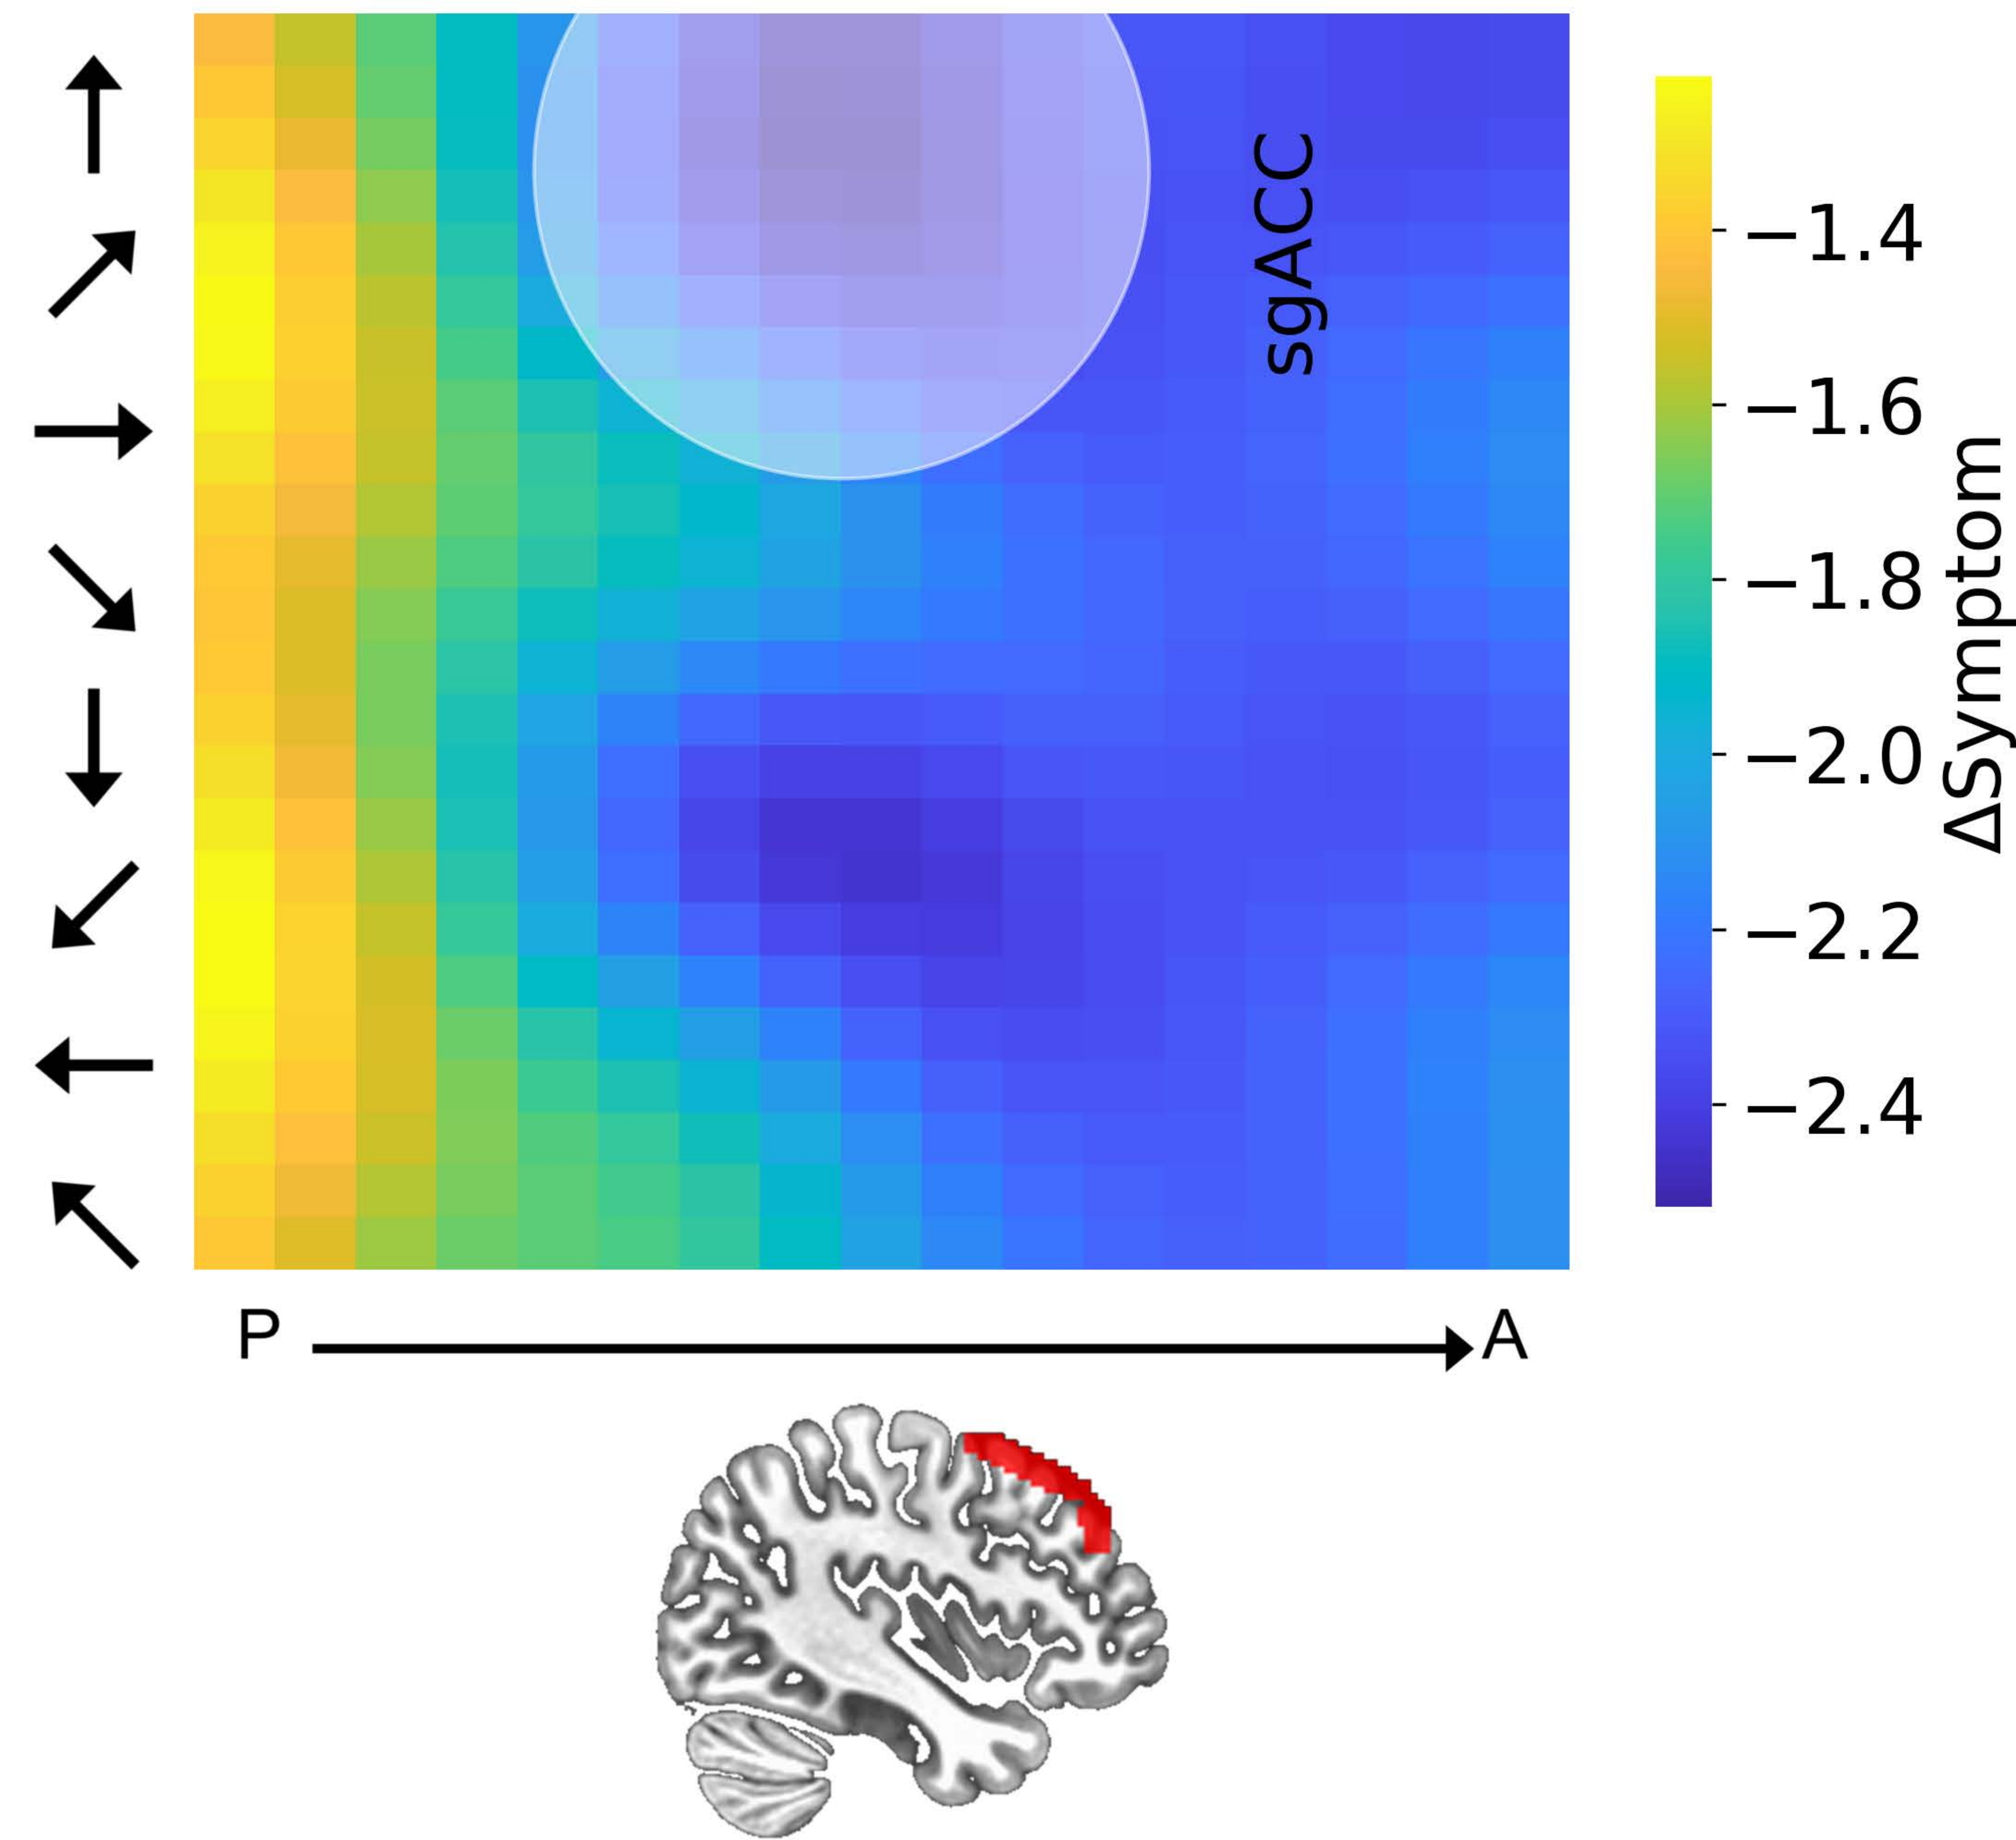



# NDARJF993NV1\_hamd\_left\_dlpfc

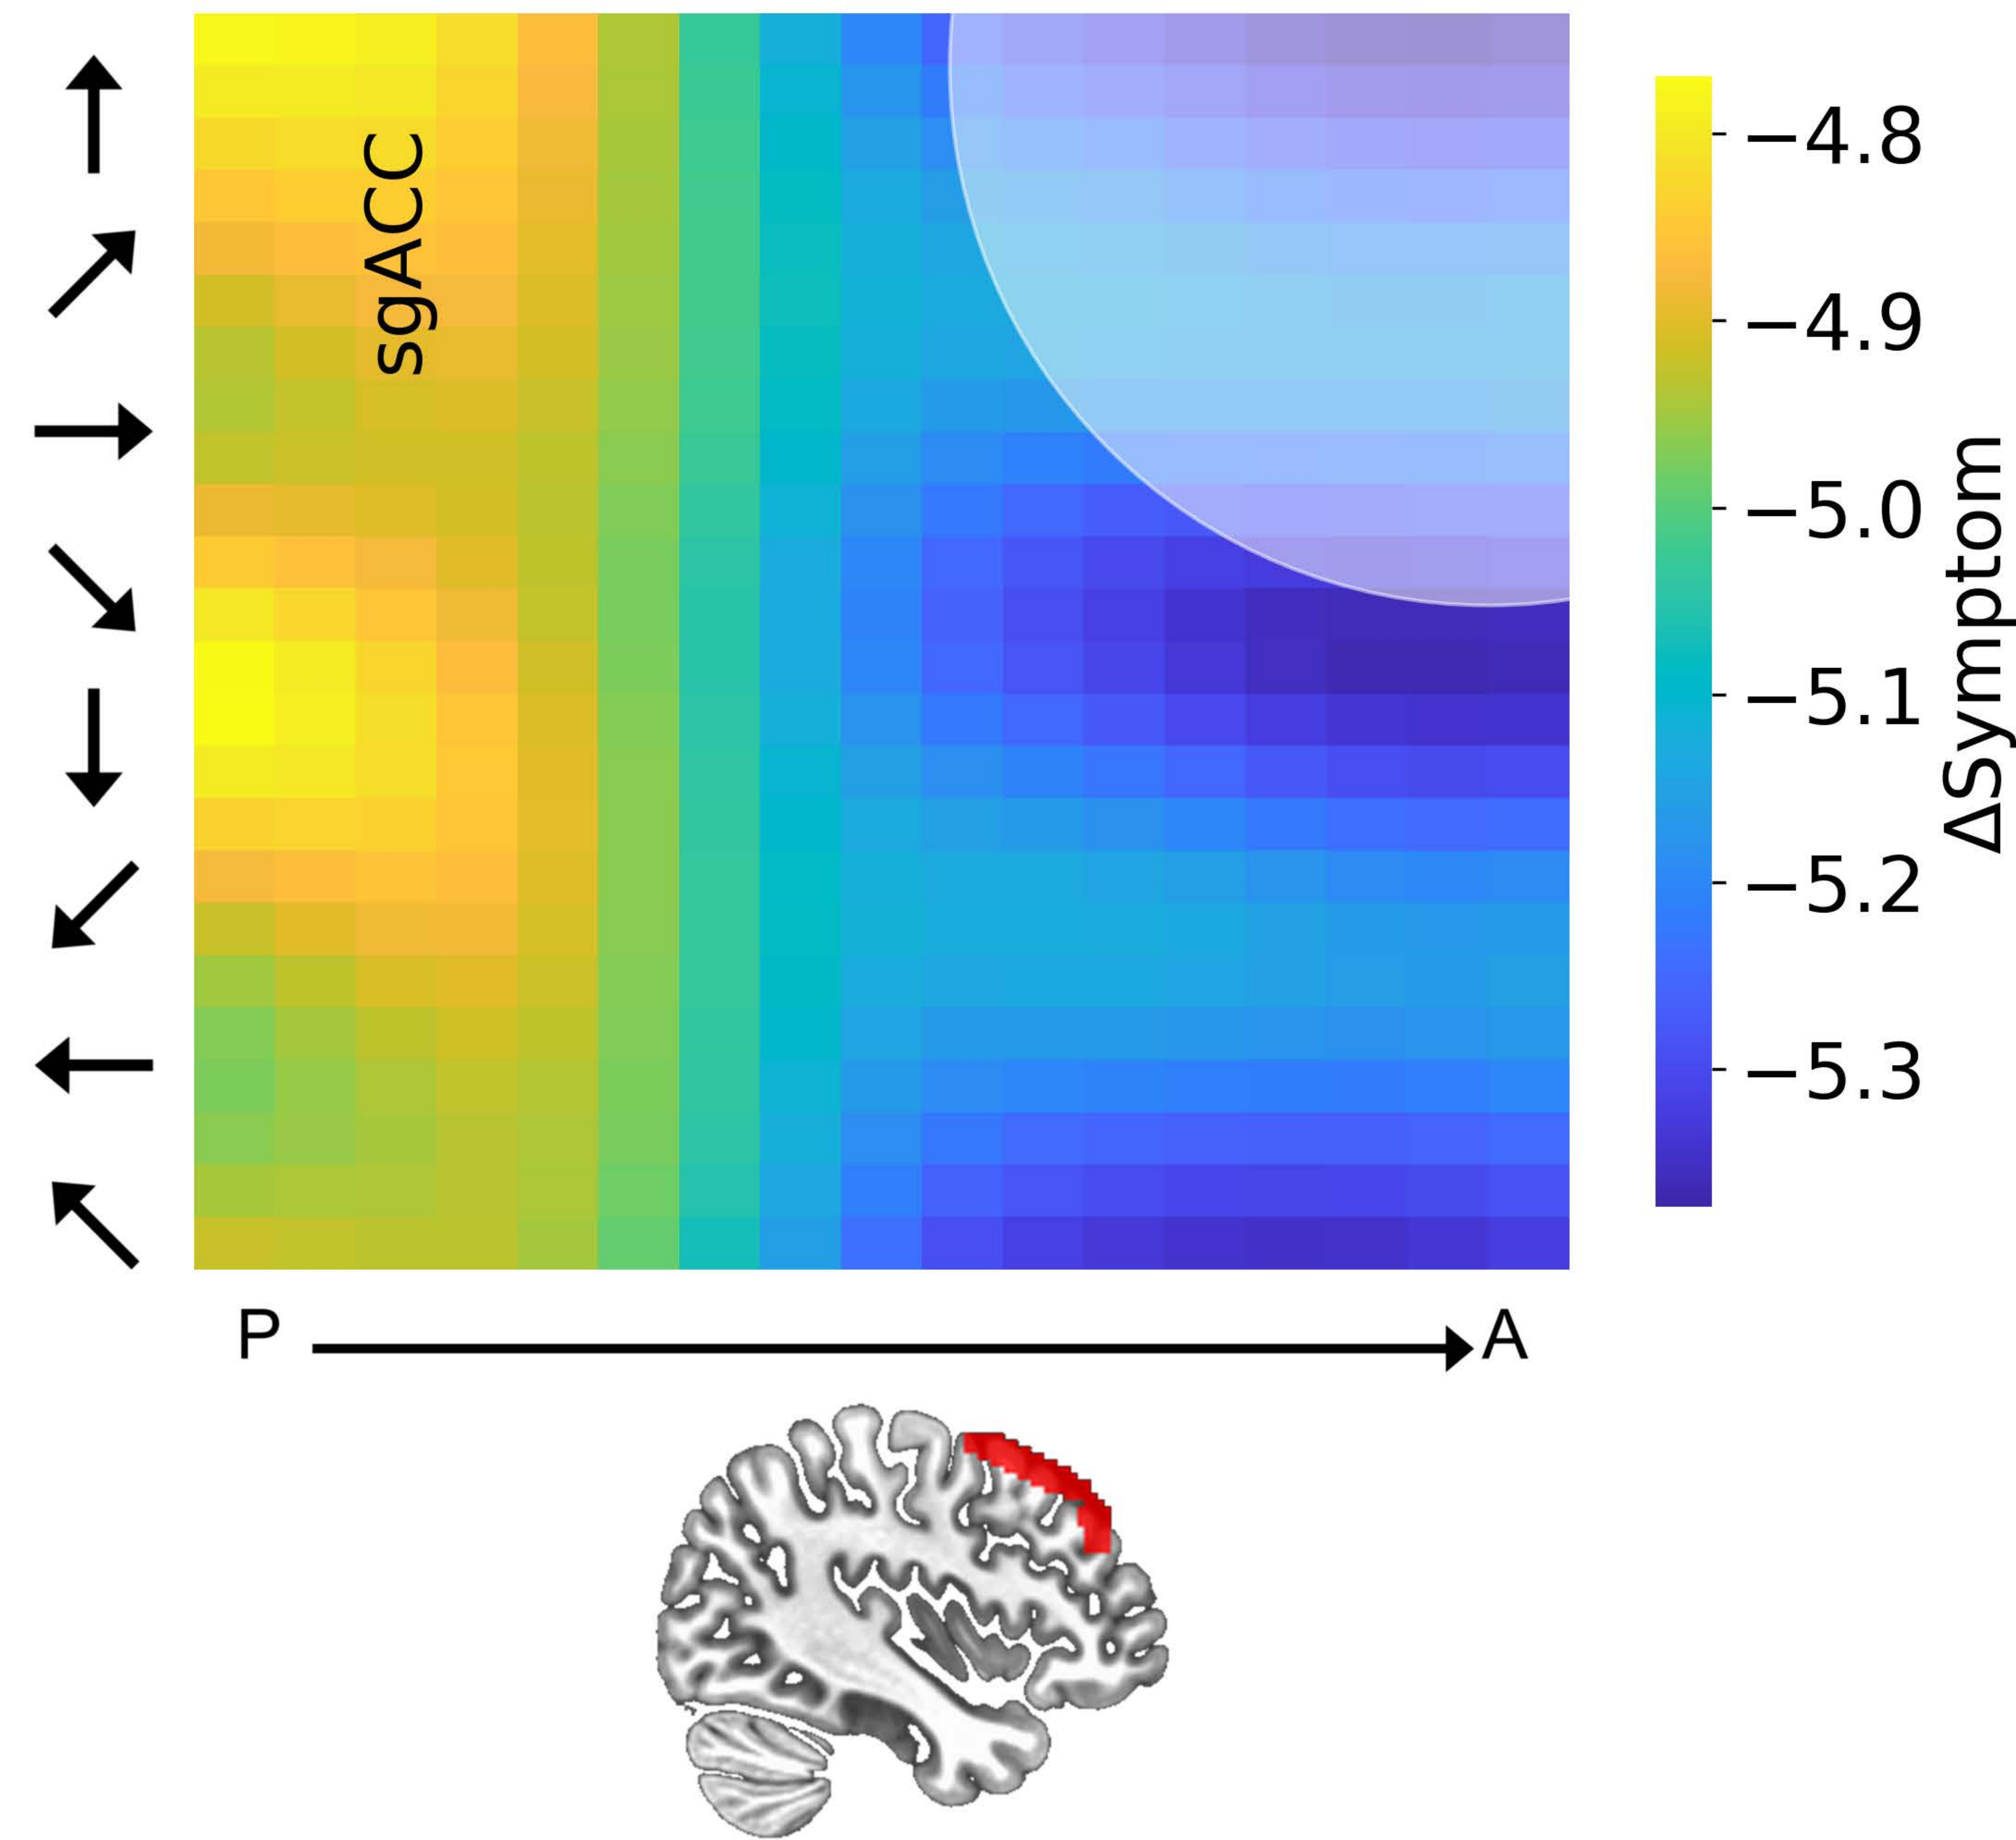



# NDARJH406WC9\_hamd\_left\_dlpfc

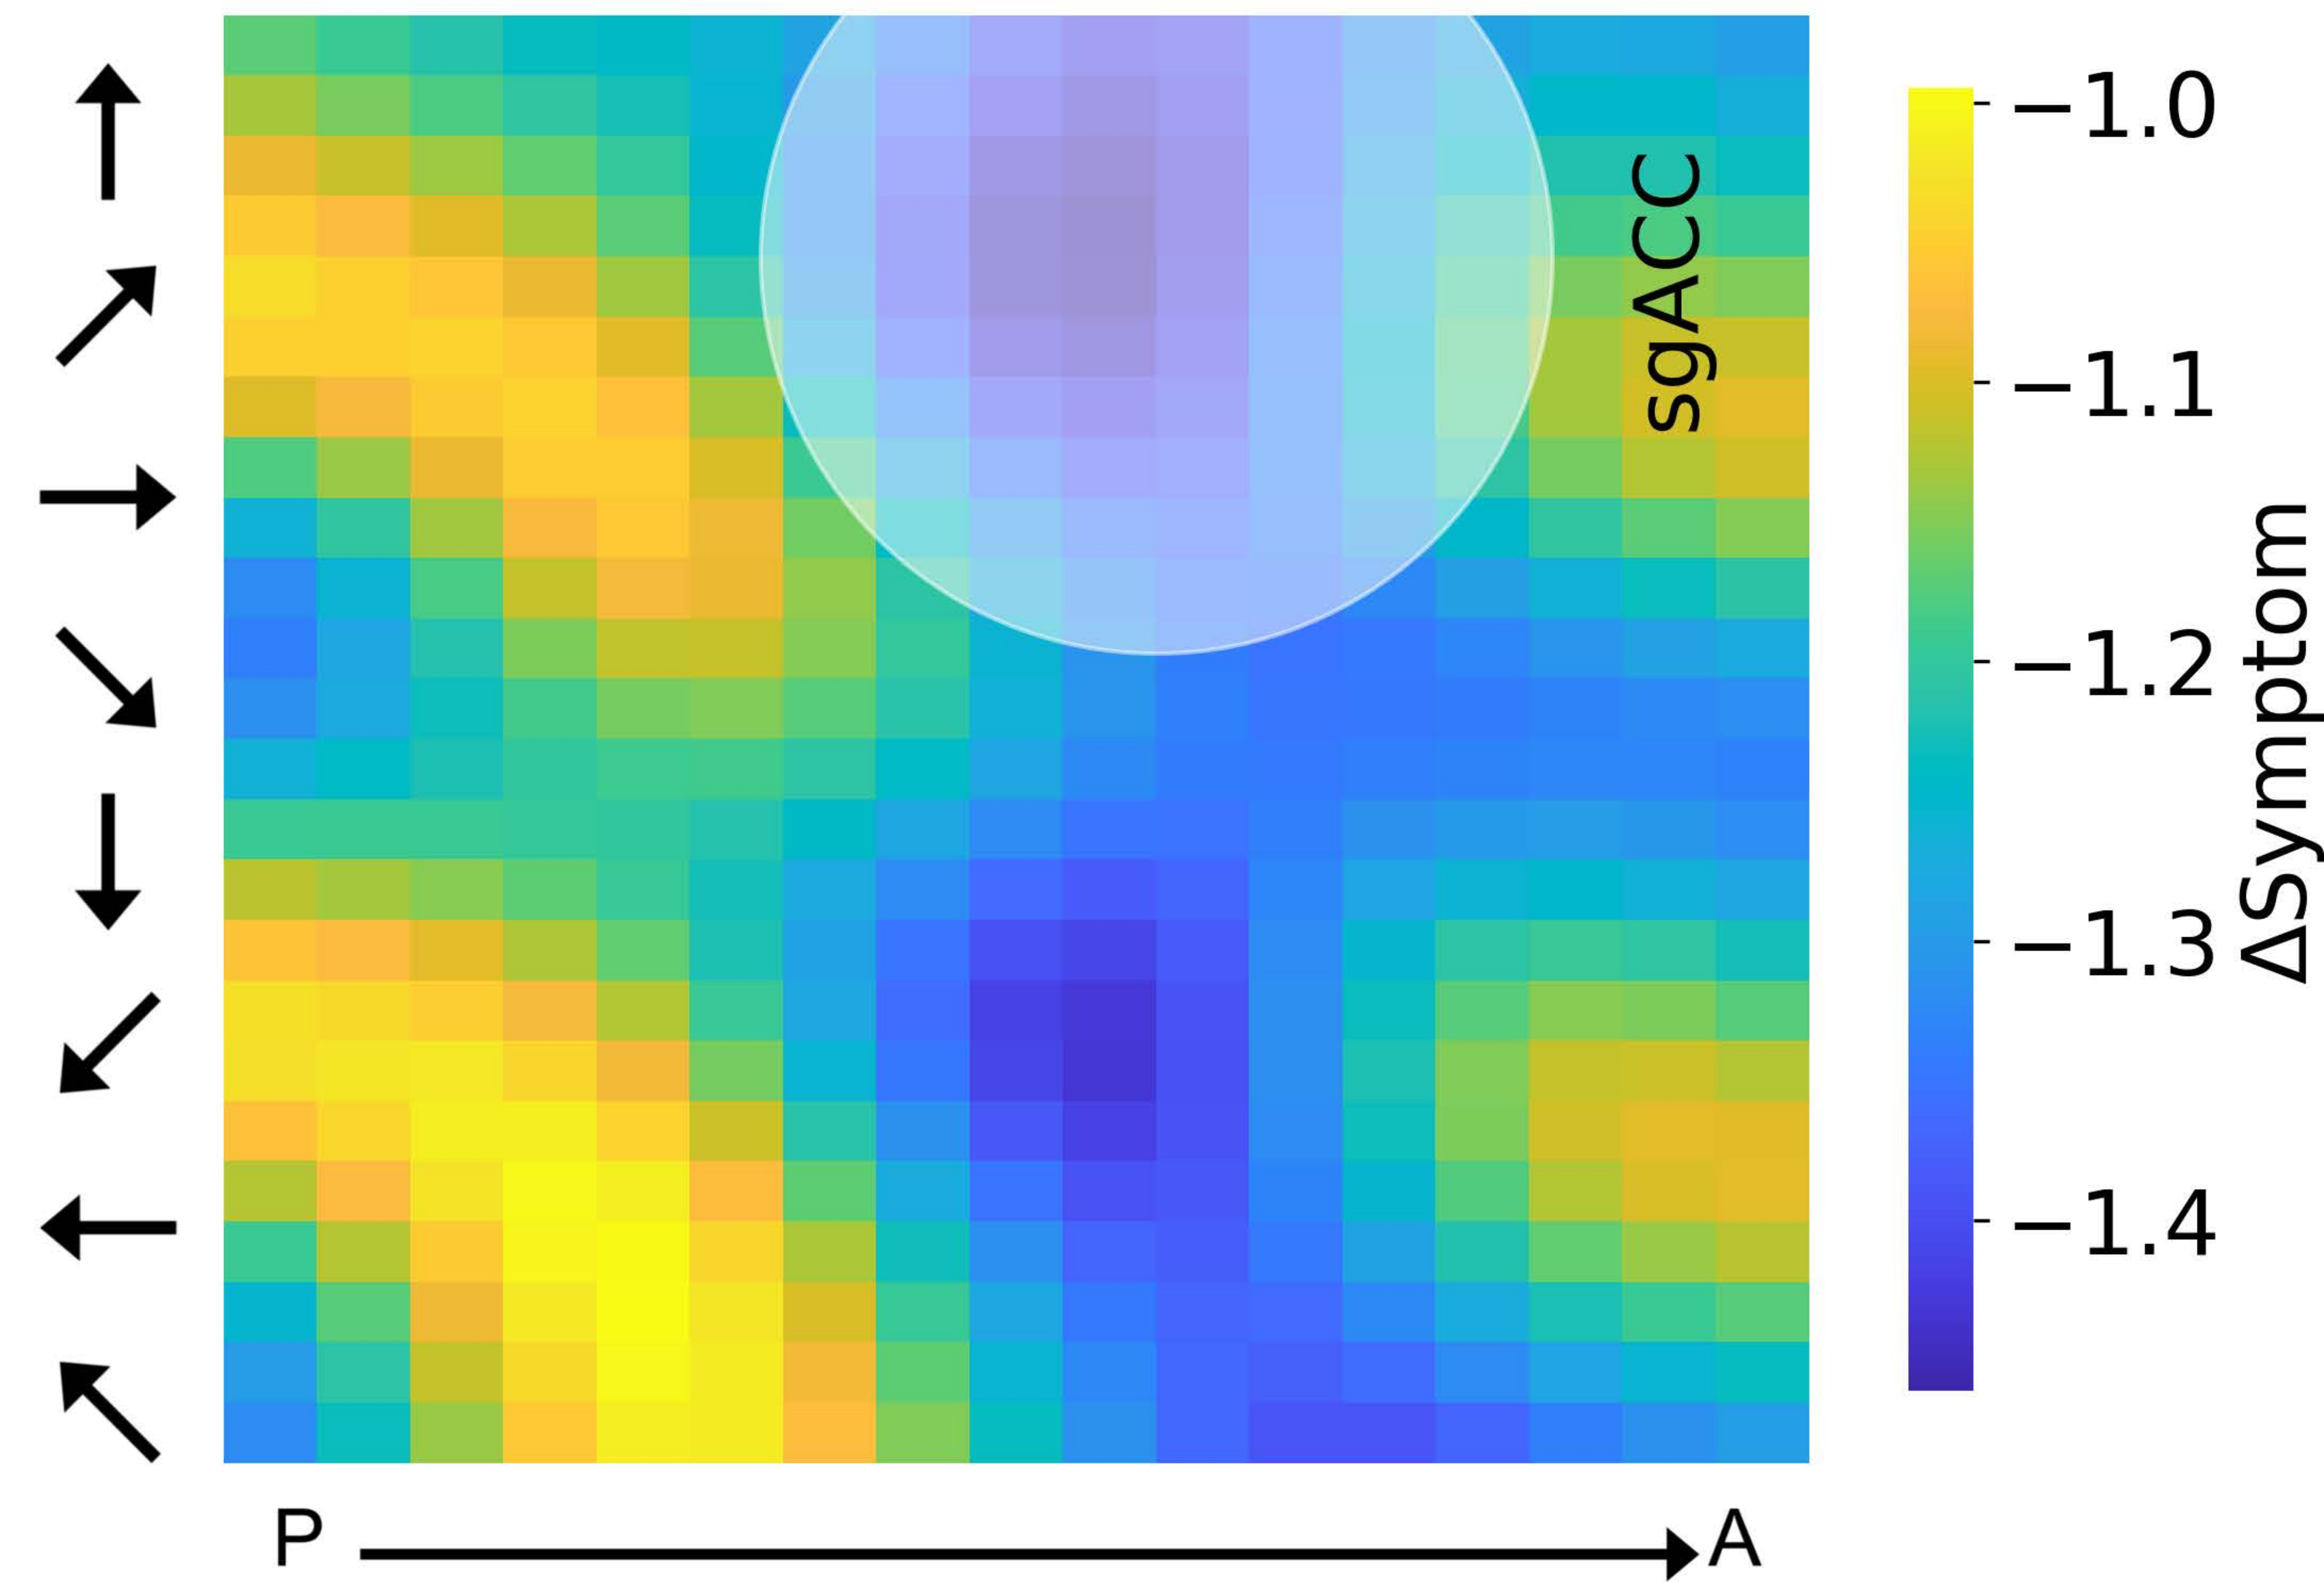



# NDARJX575DVK\_hamd\_left\_dlpfc

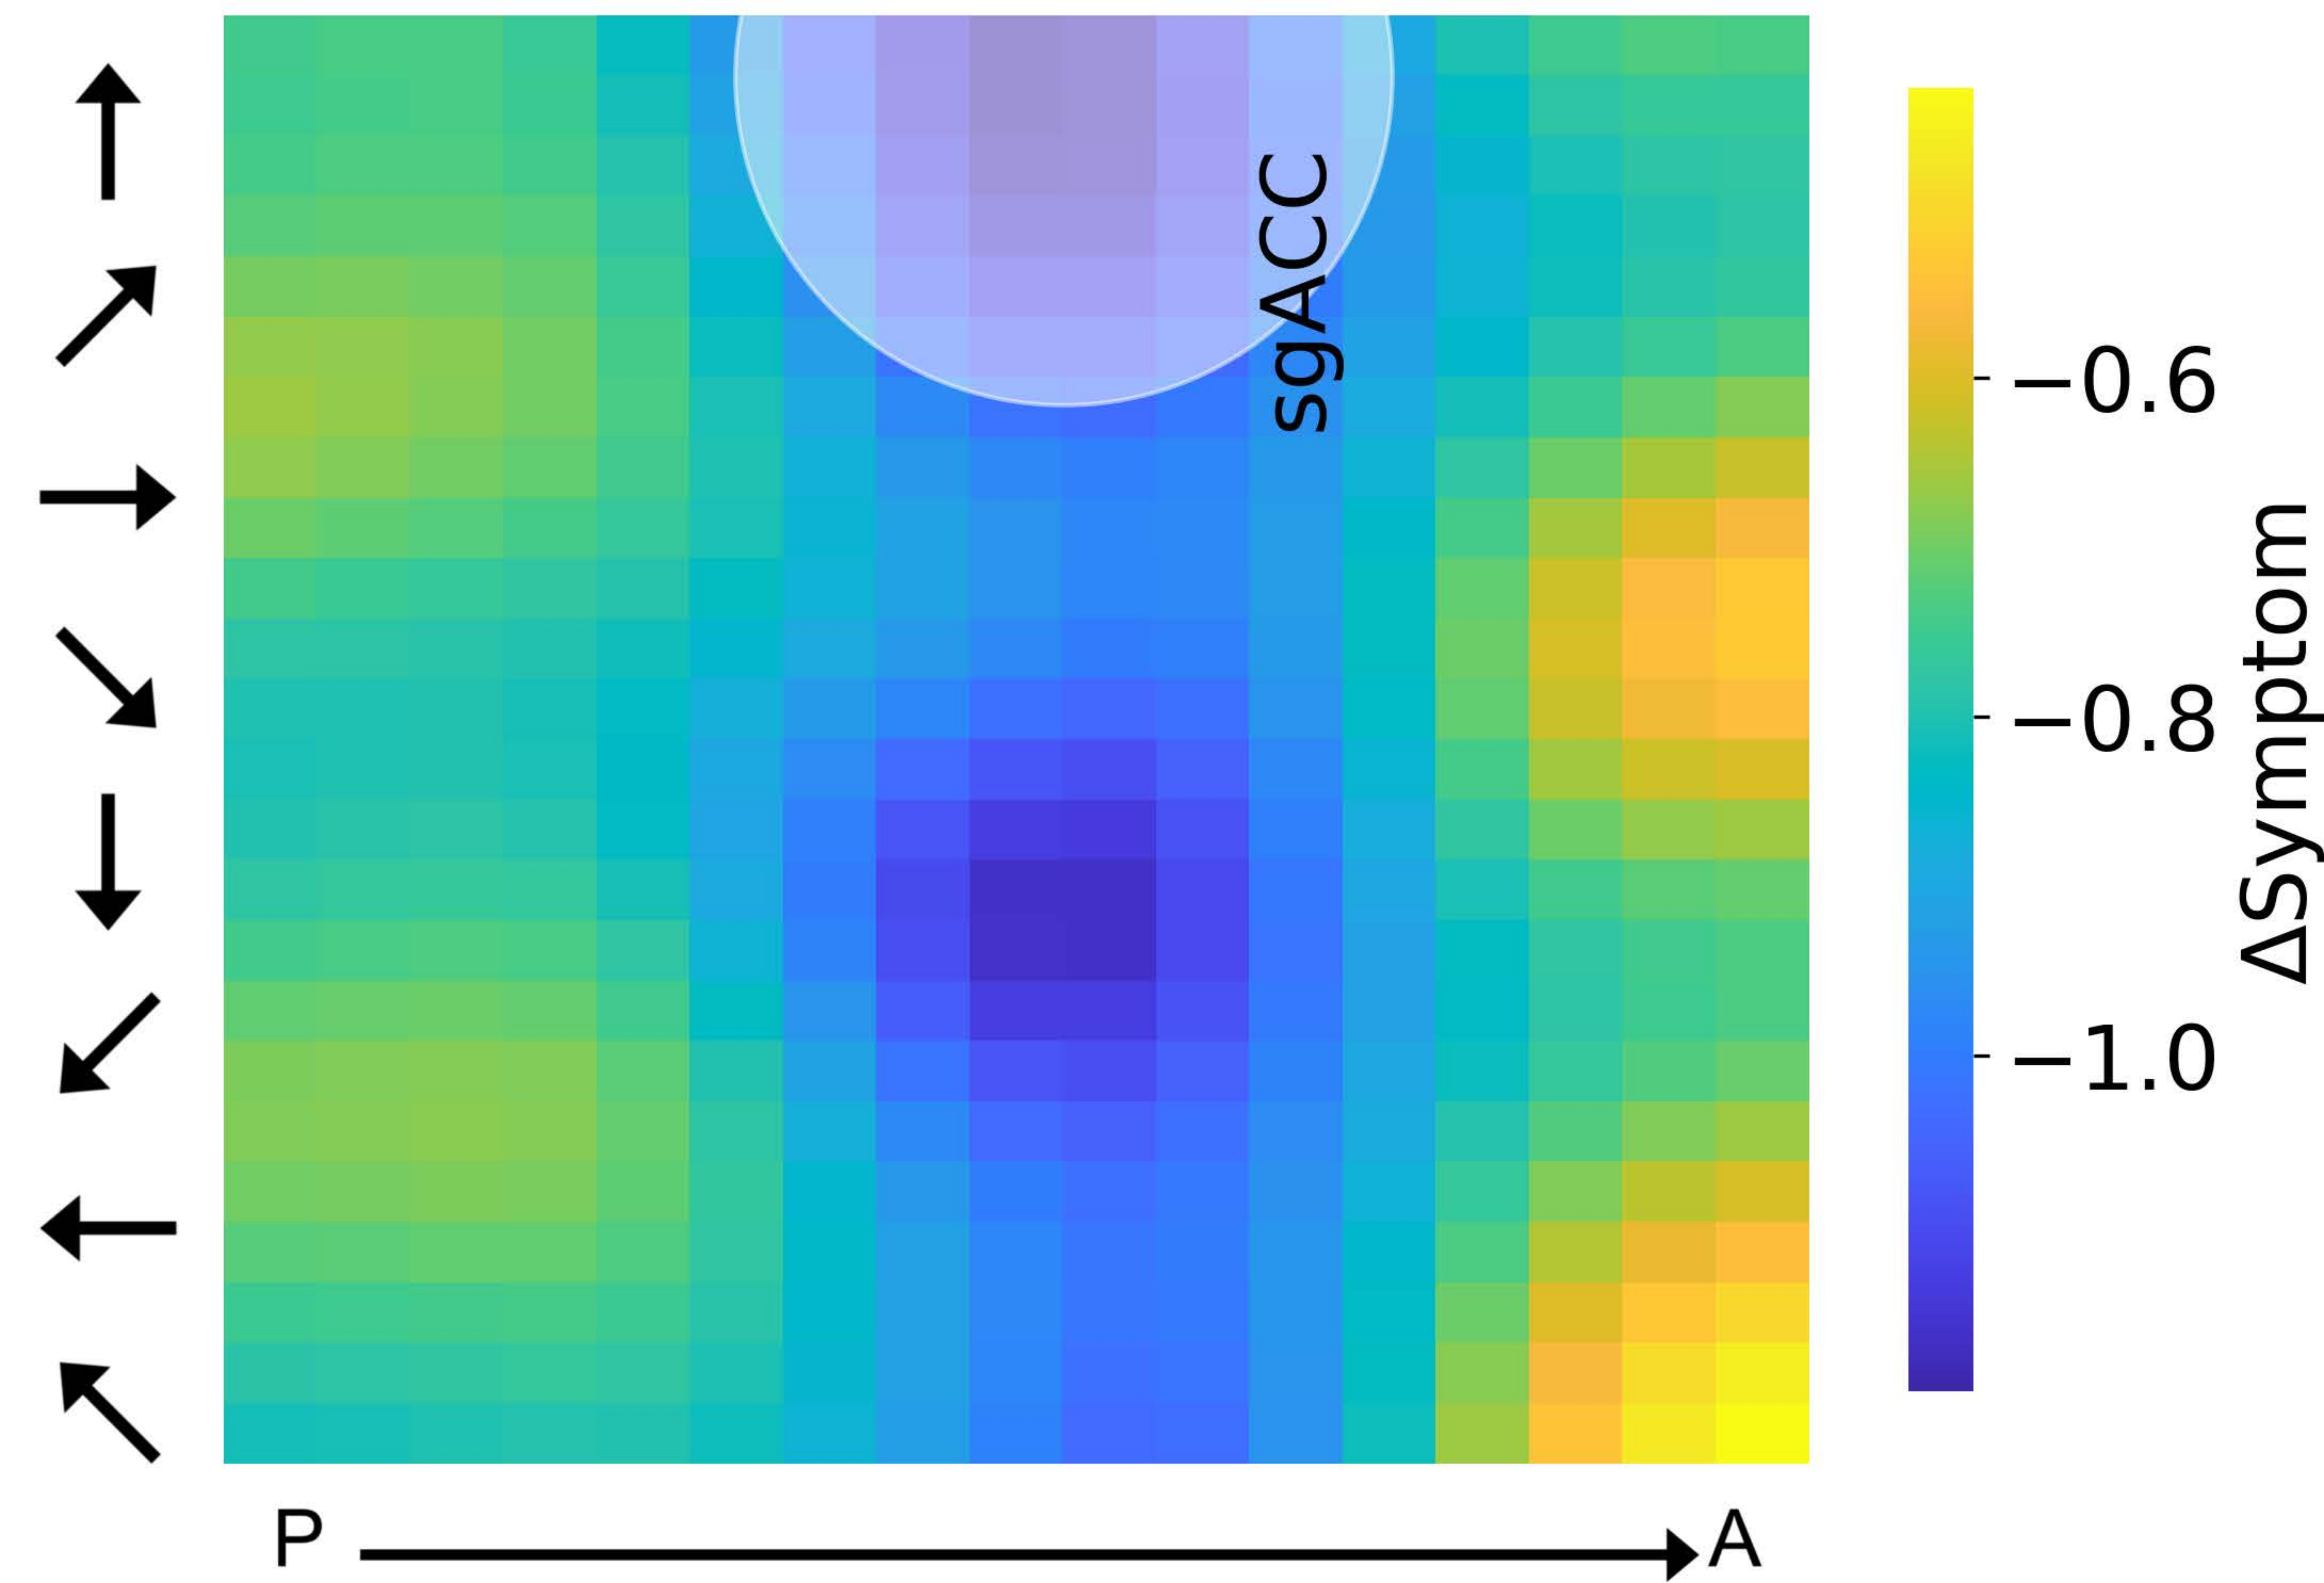



NDARJY042TLY\_hamd\_left\_dlpfc

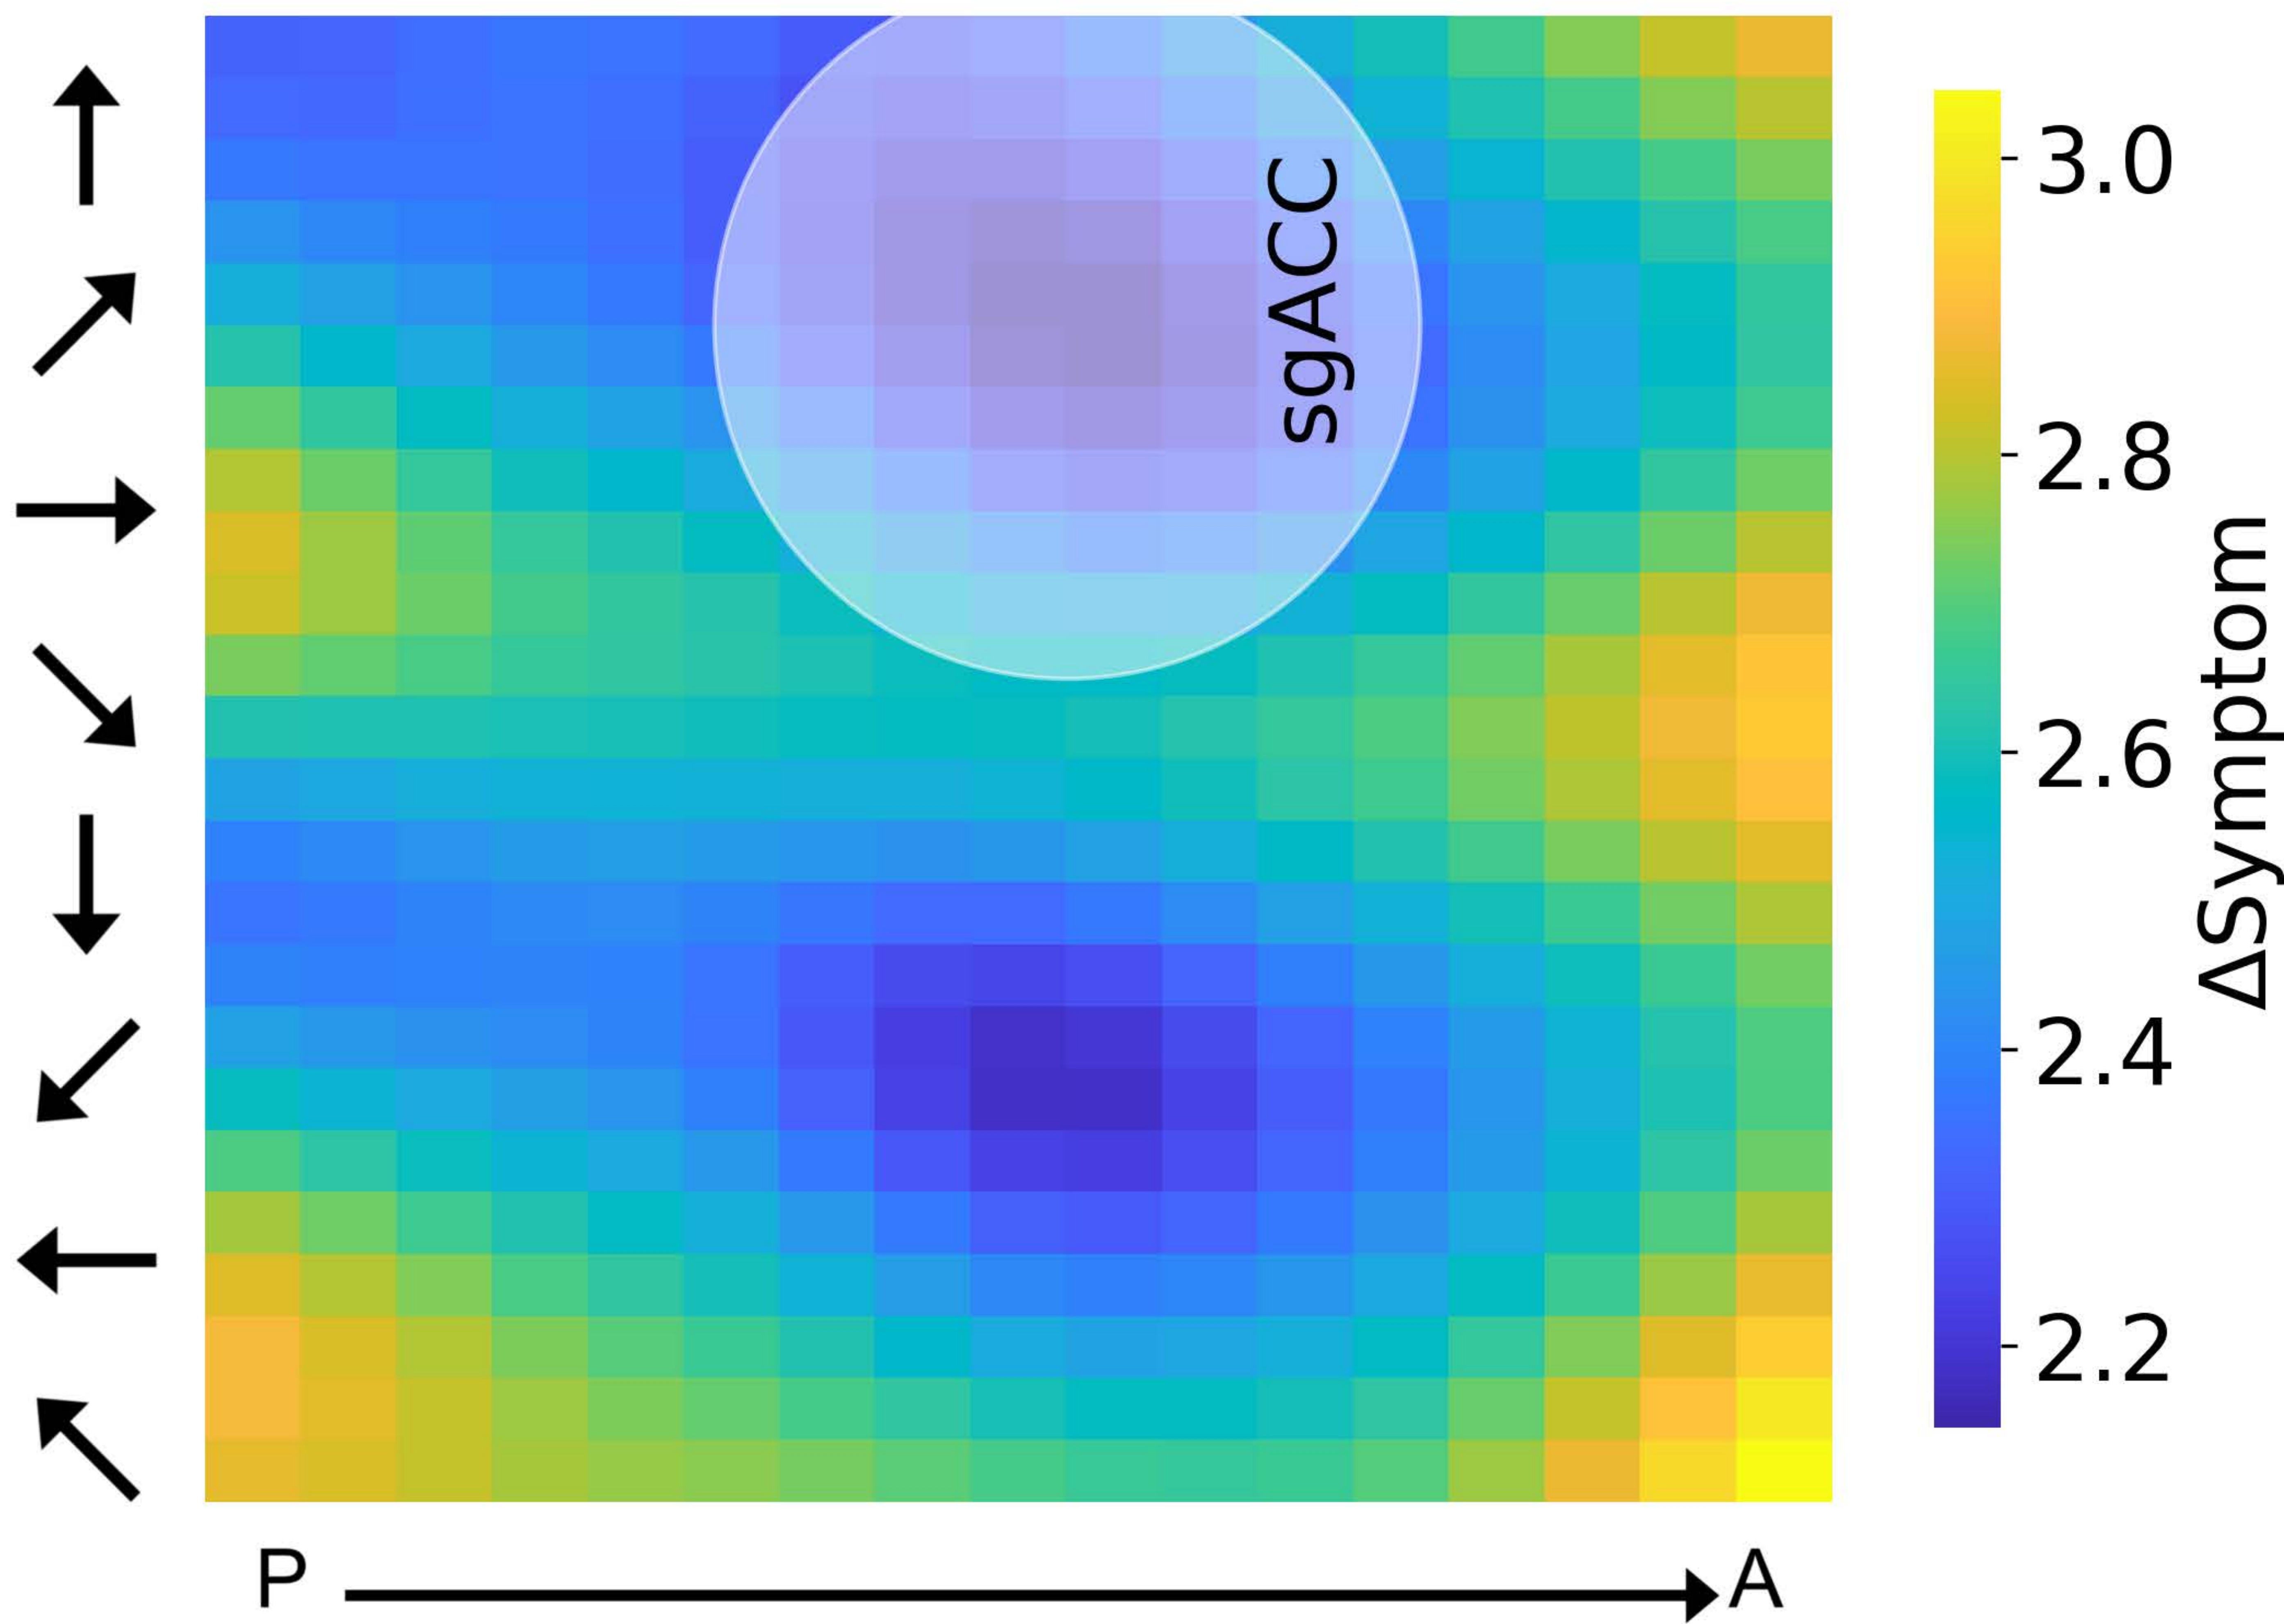



# NDARKK212YTX\_hamd\_left\_dlpfc

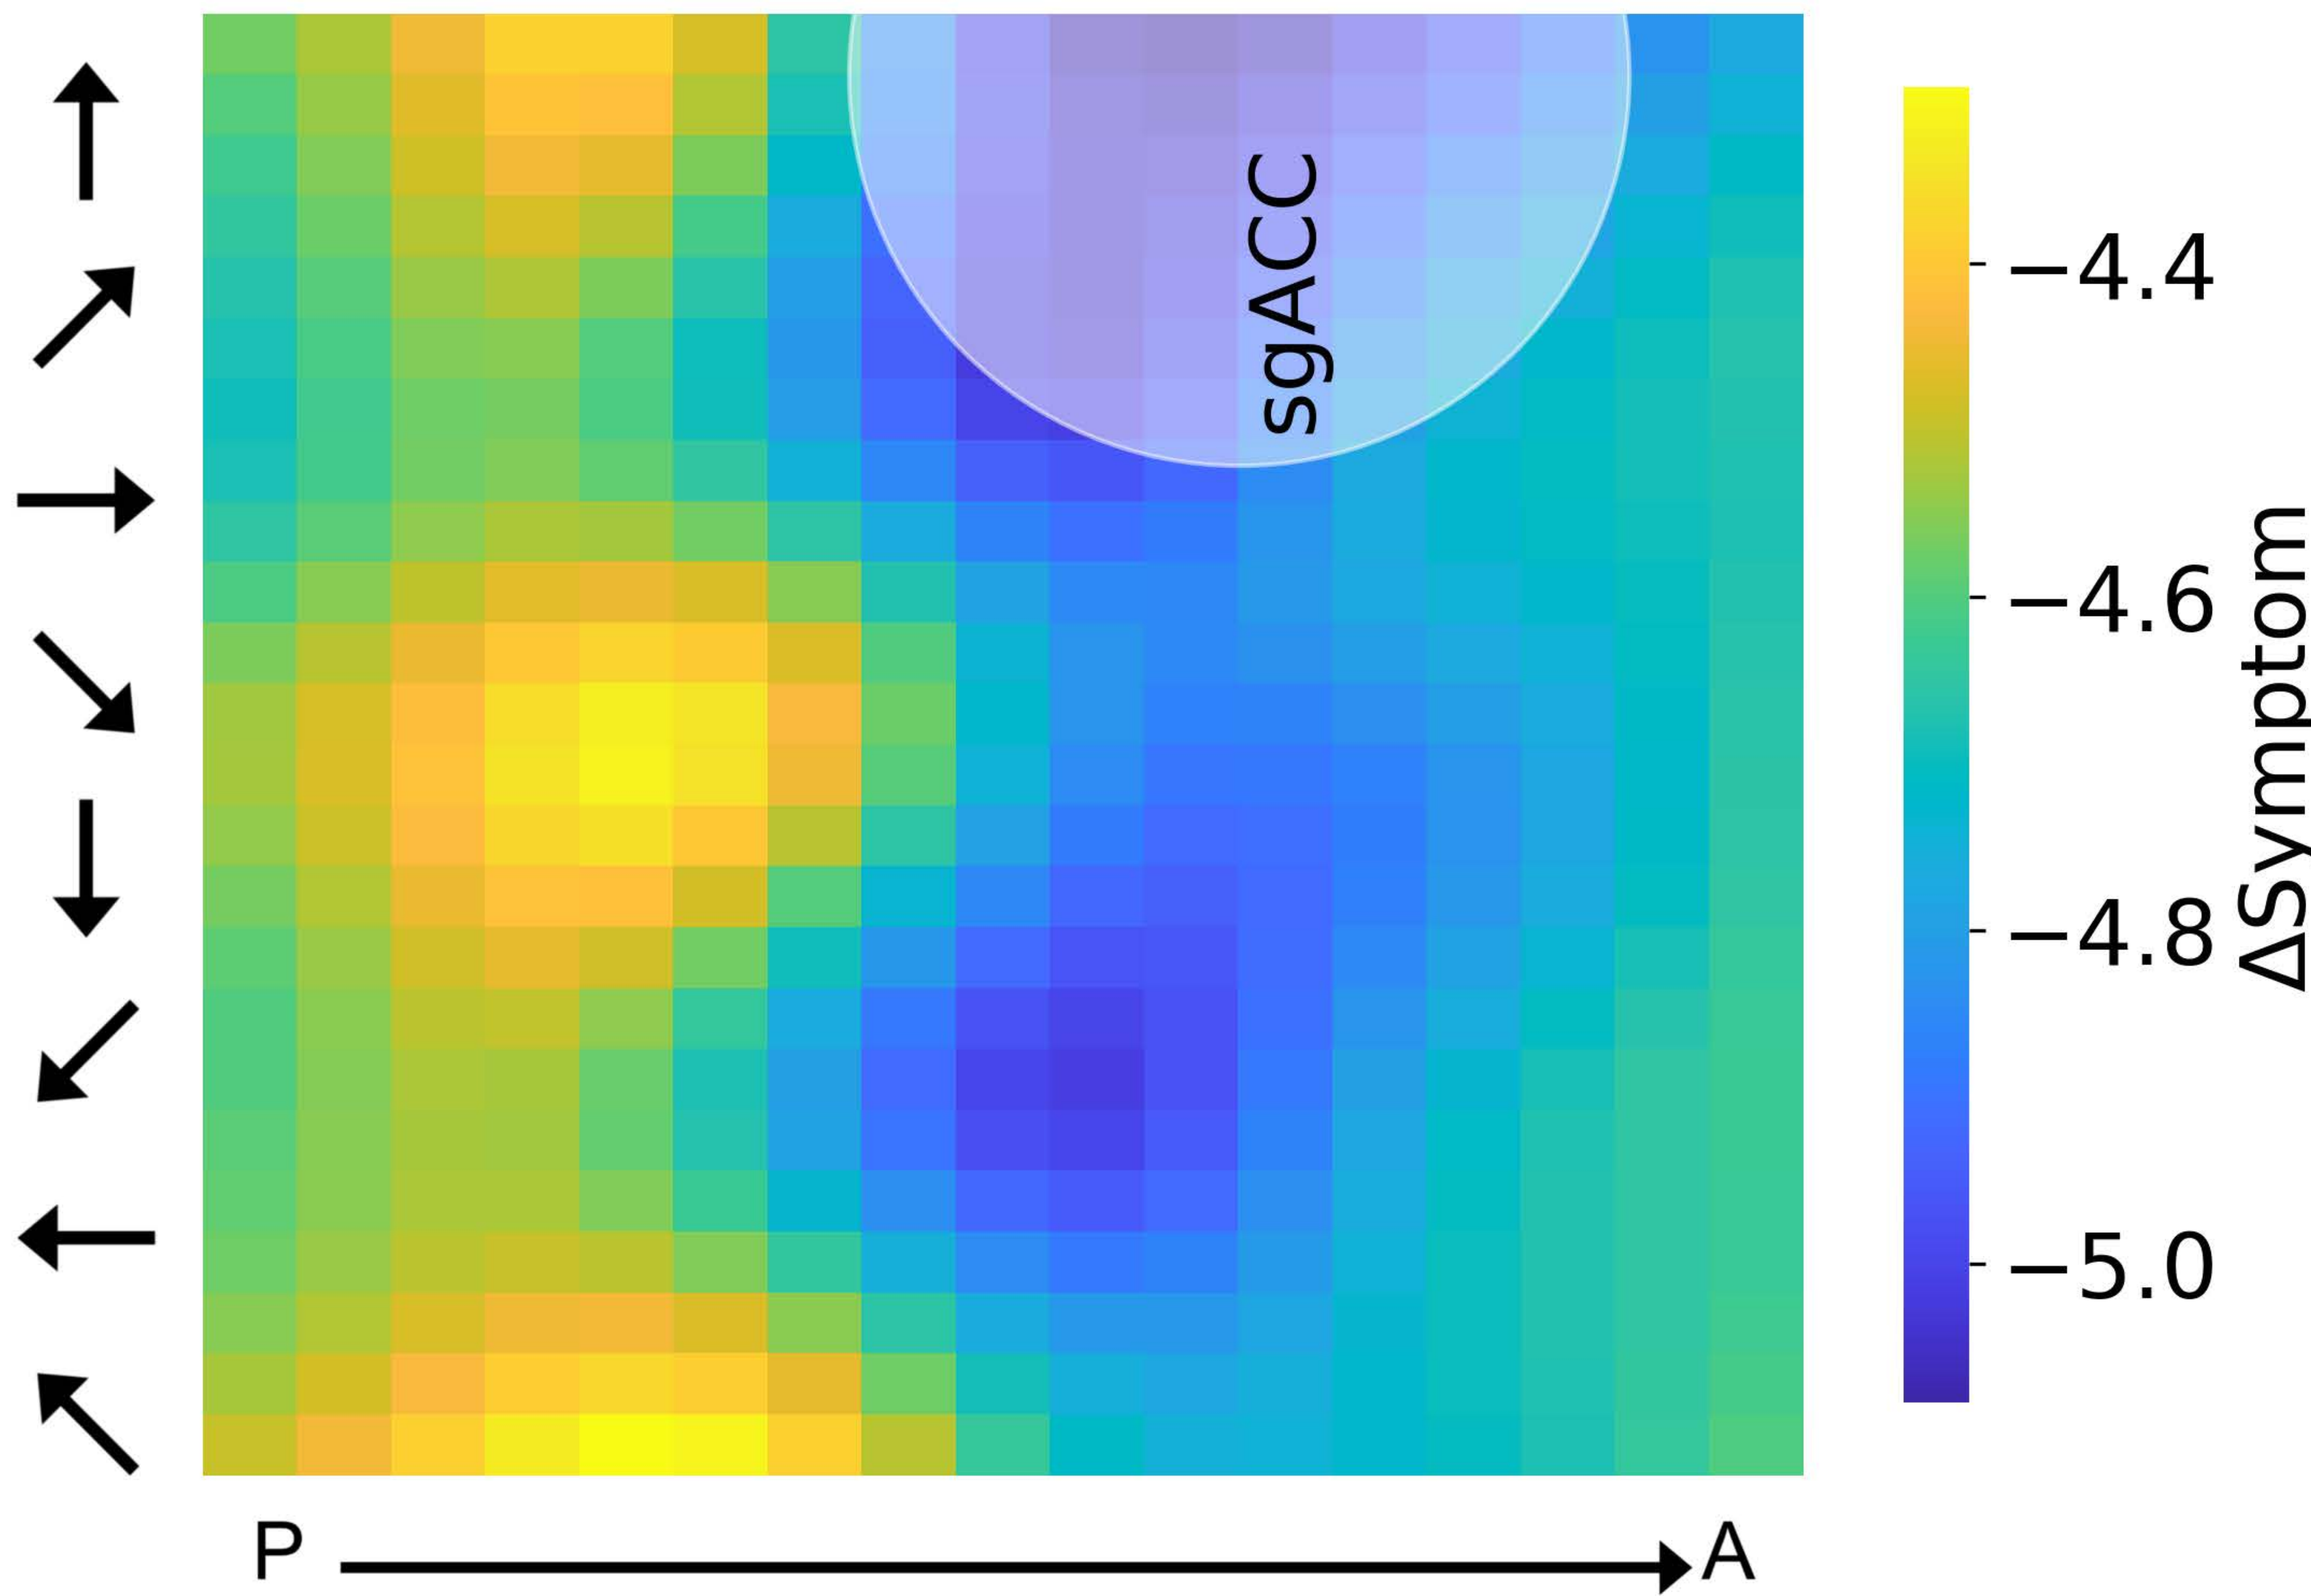



# NDARKM333VX2\_hamd\_left\_dlpfc

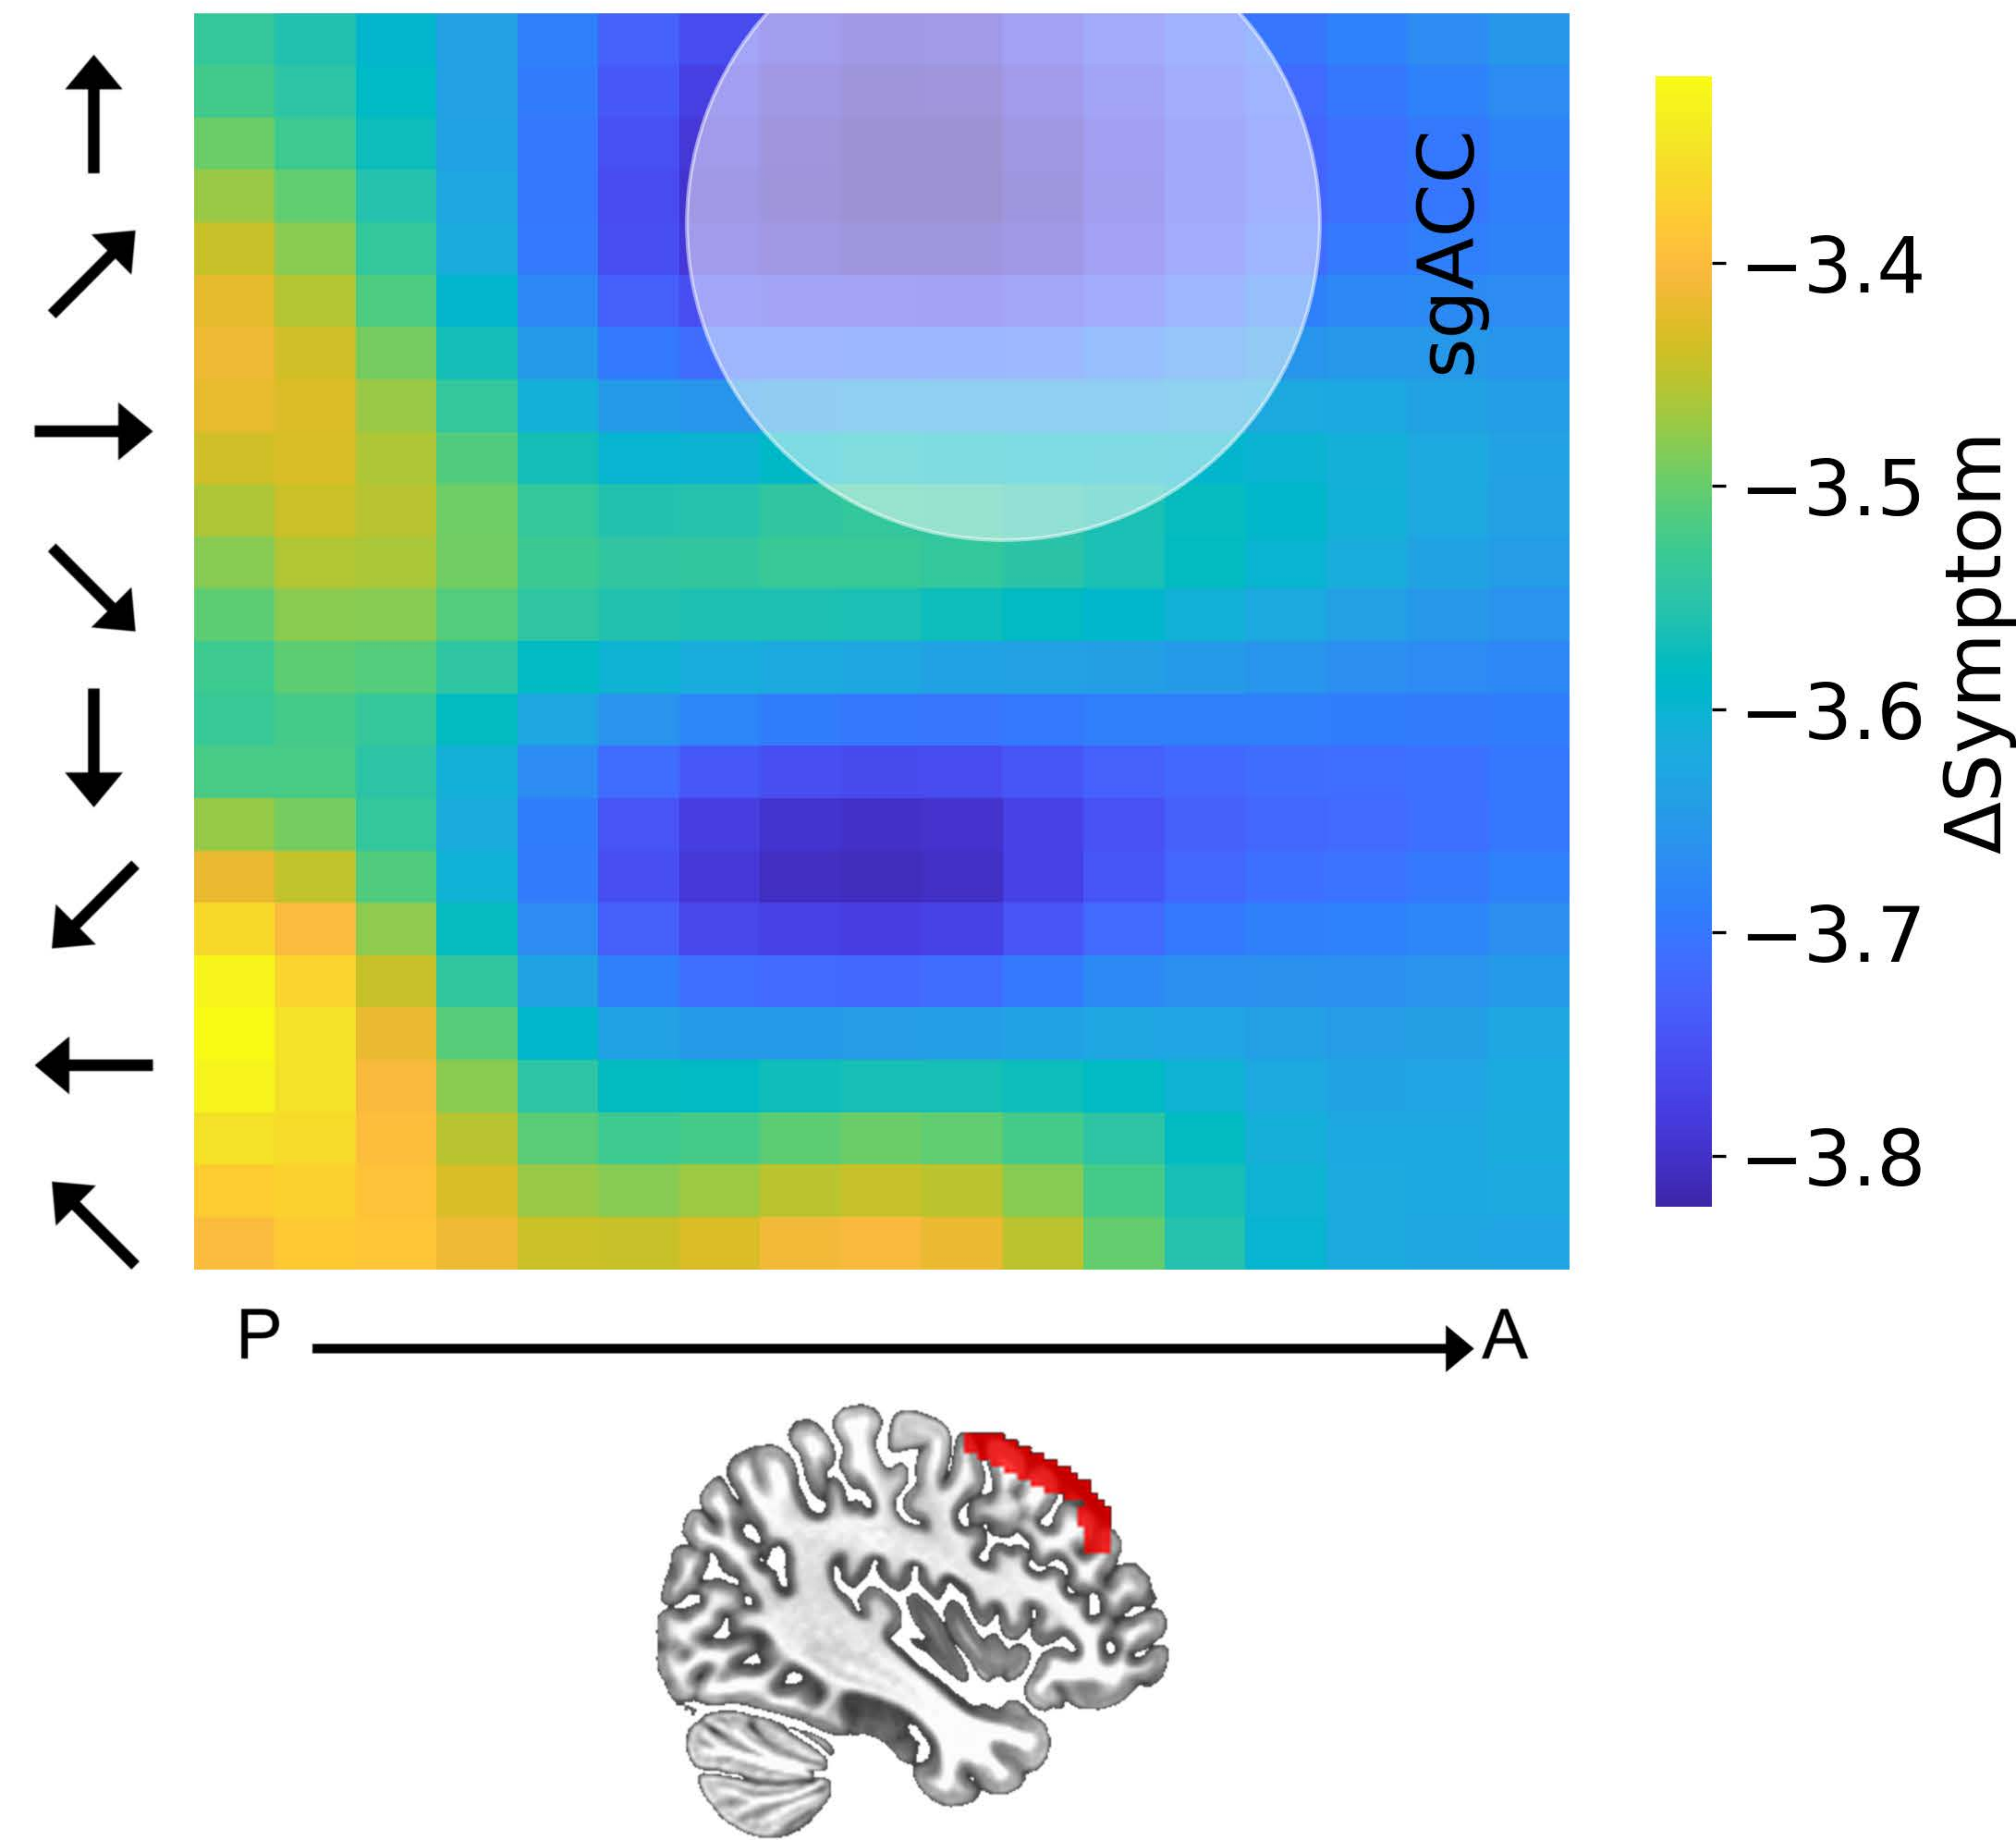



# INDARKT991DUC\_hamd\_left\_dlpfc

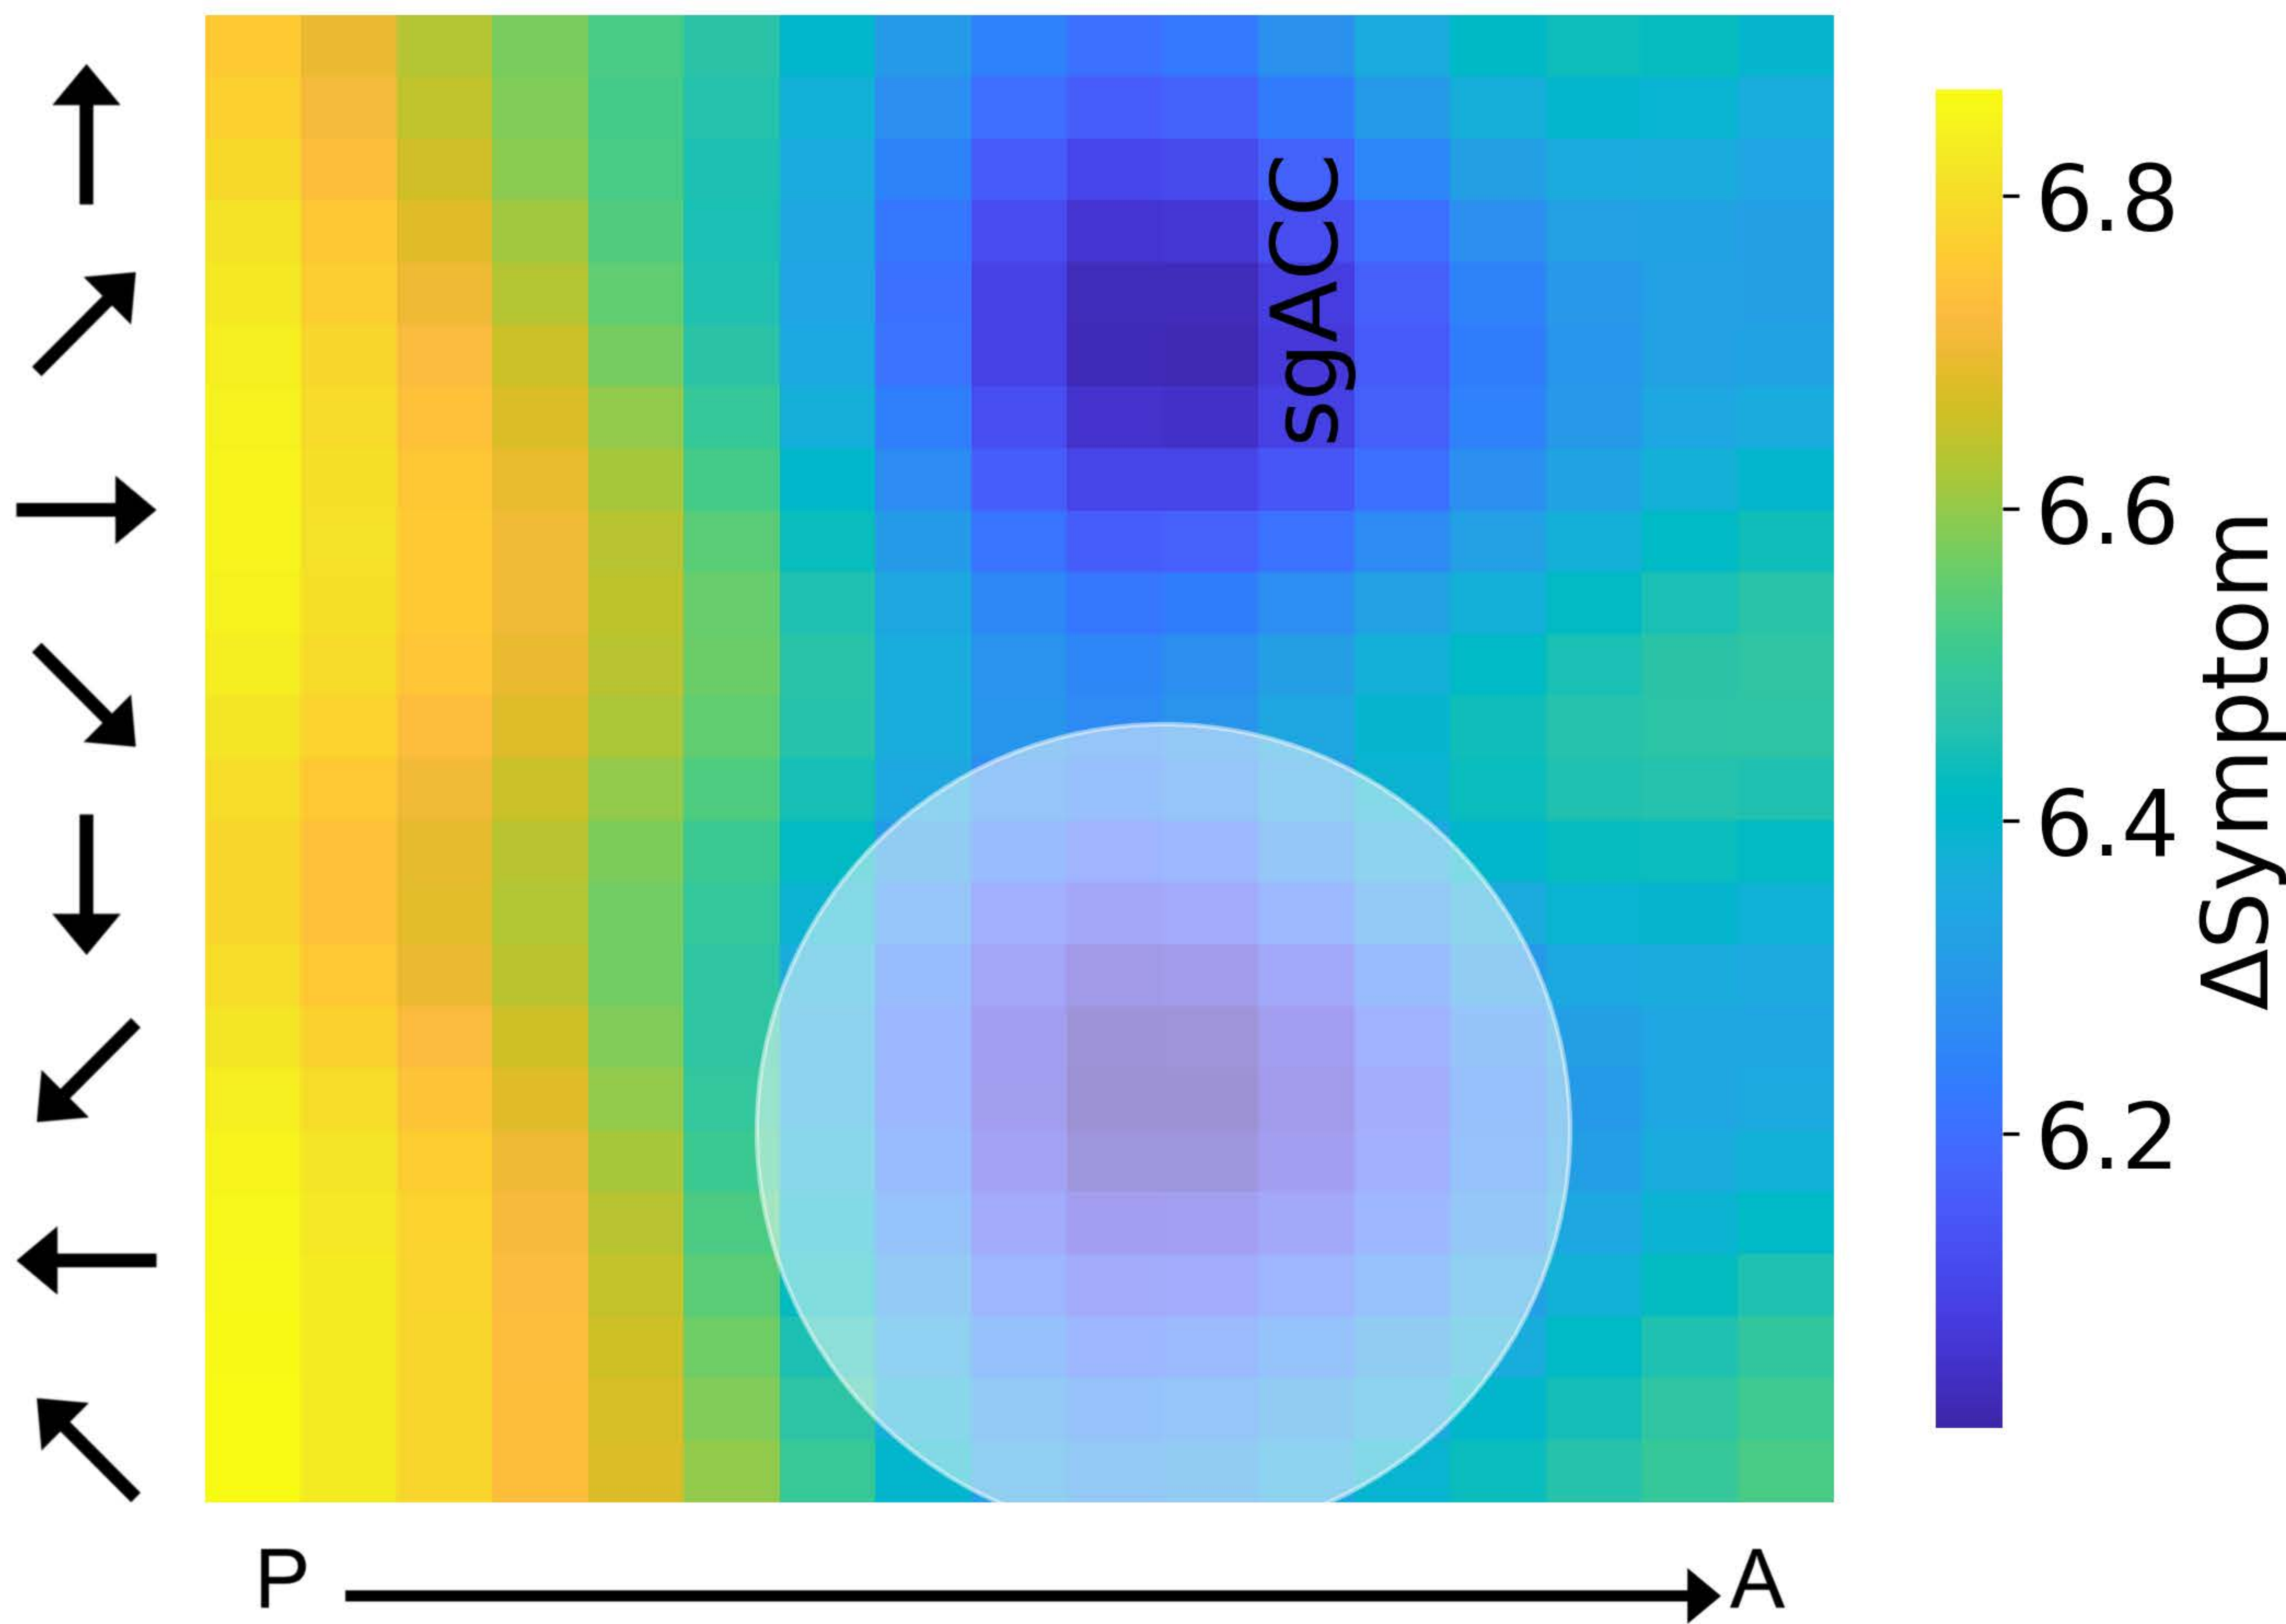



# NDARKU015LTM\_hamd\_left\_dlpfc

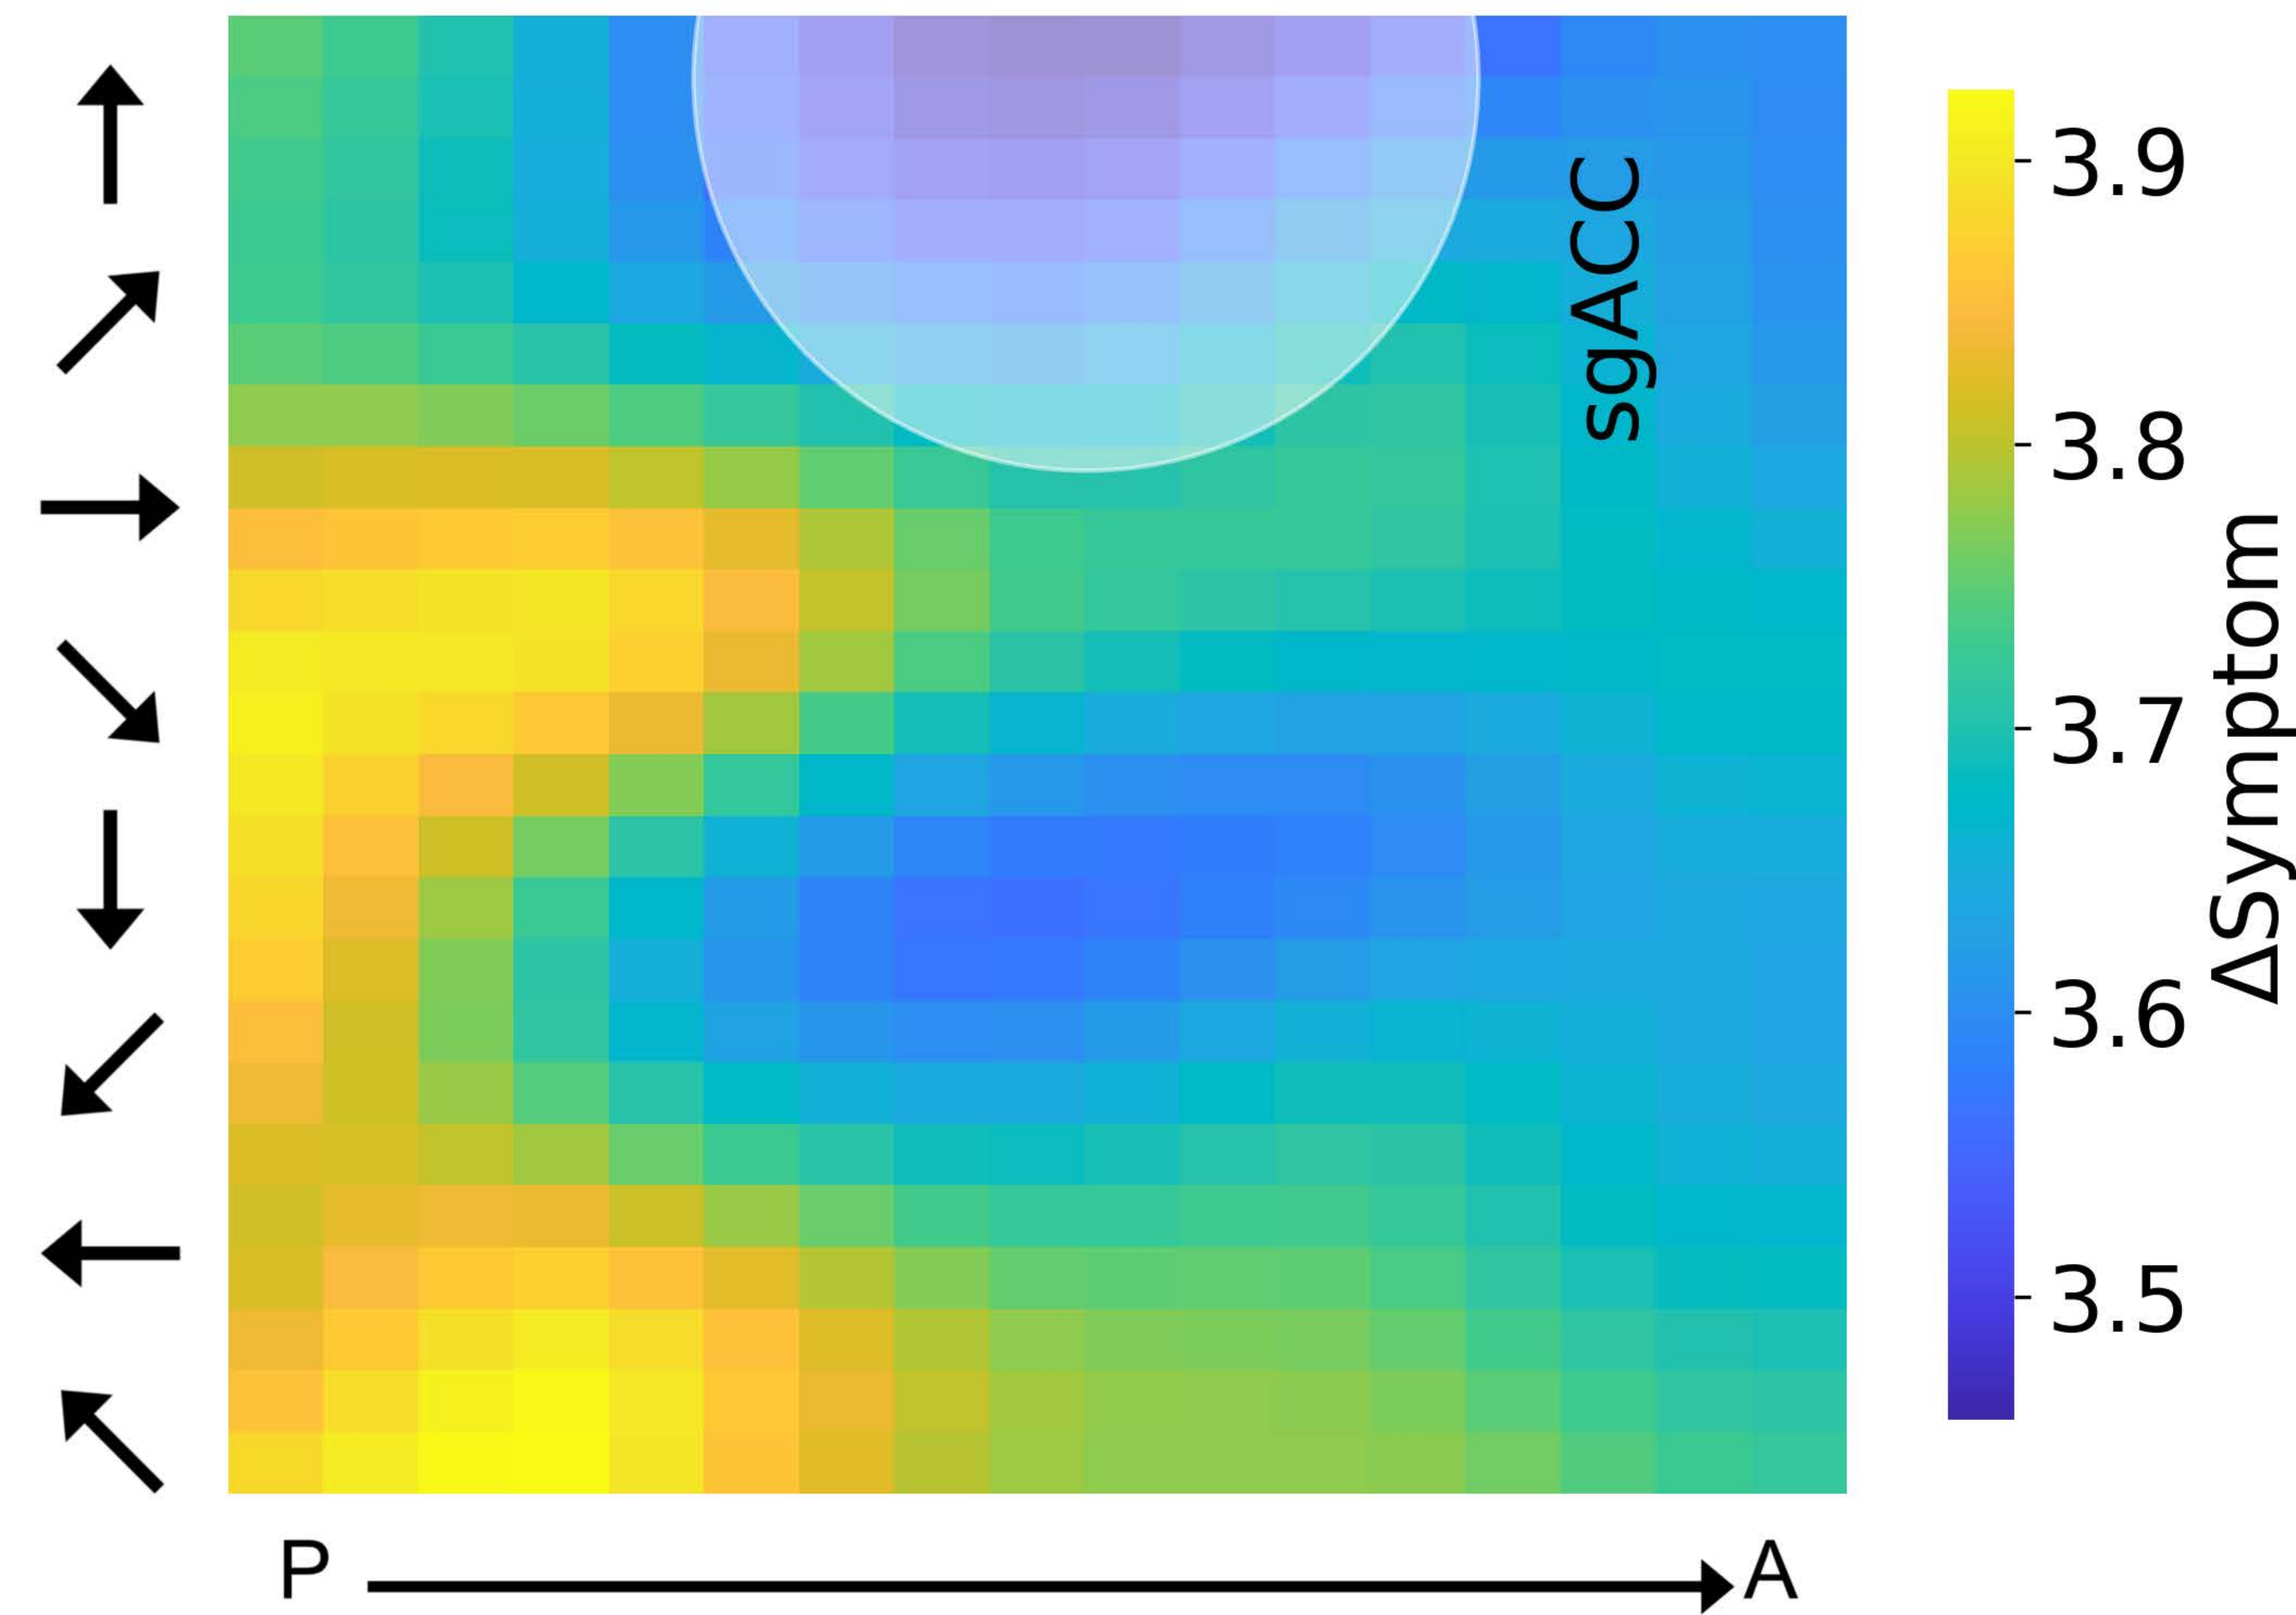



# INDARKV126RTP\_hamd\_left\_dlpfc

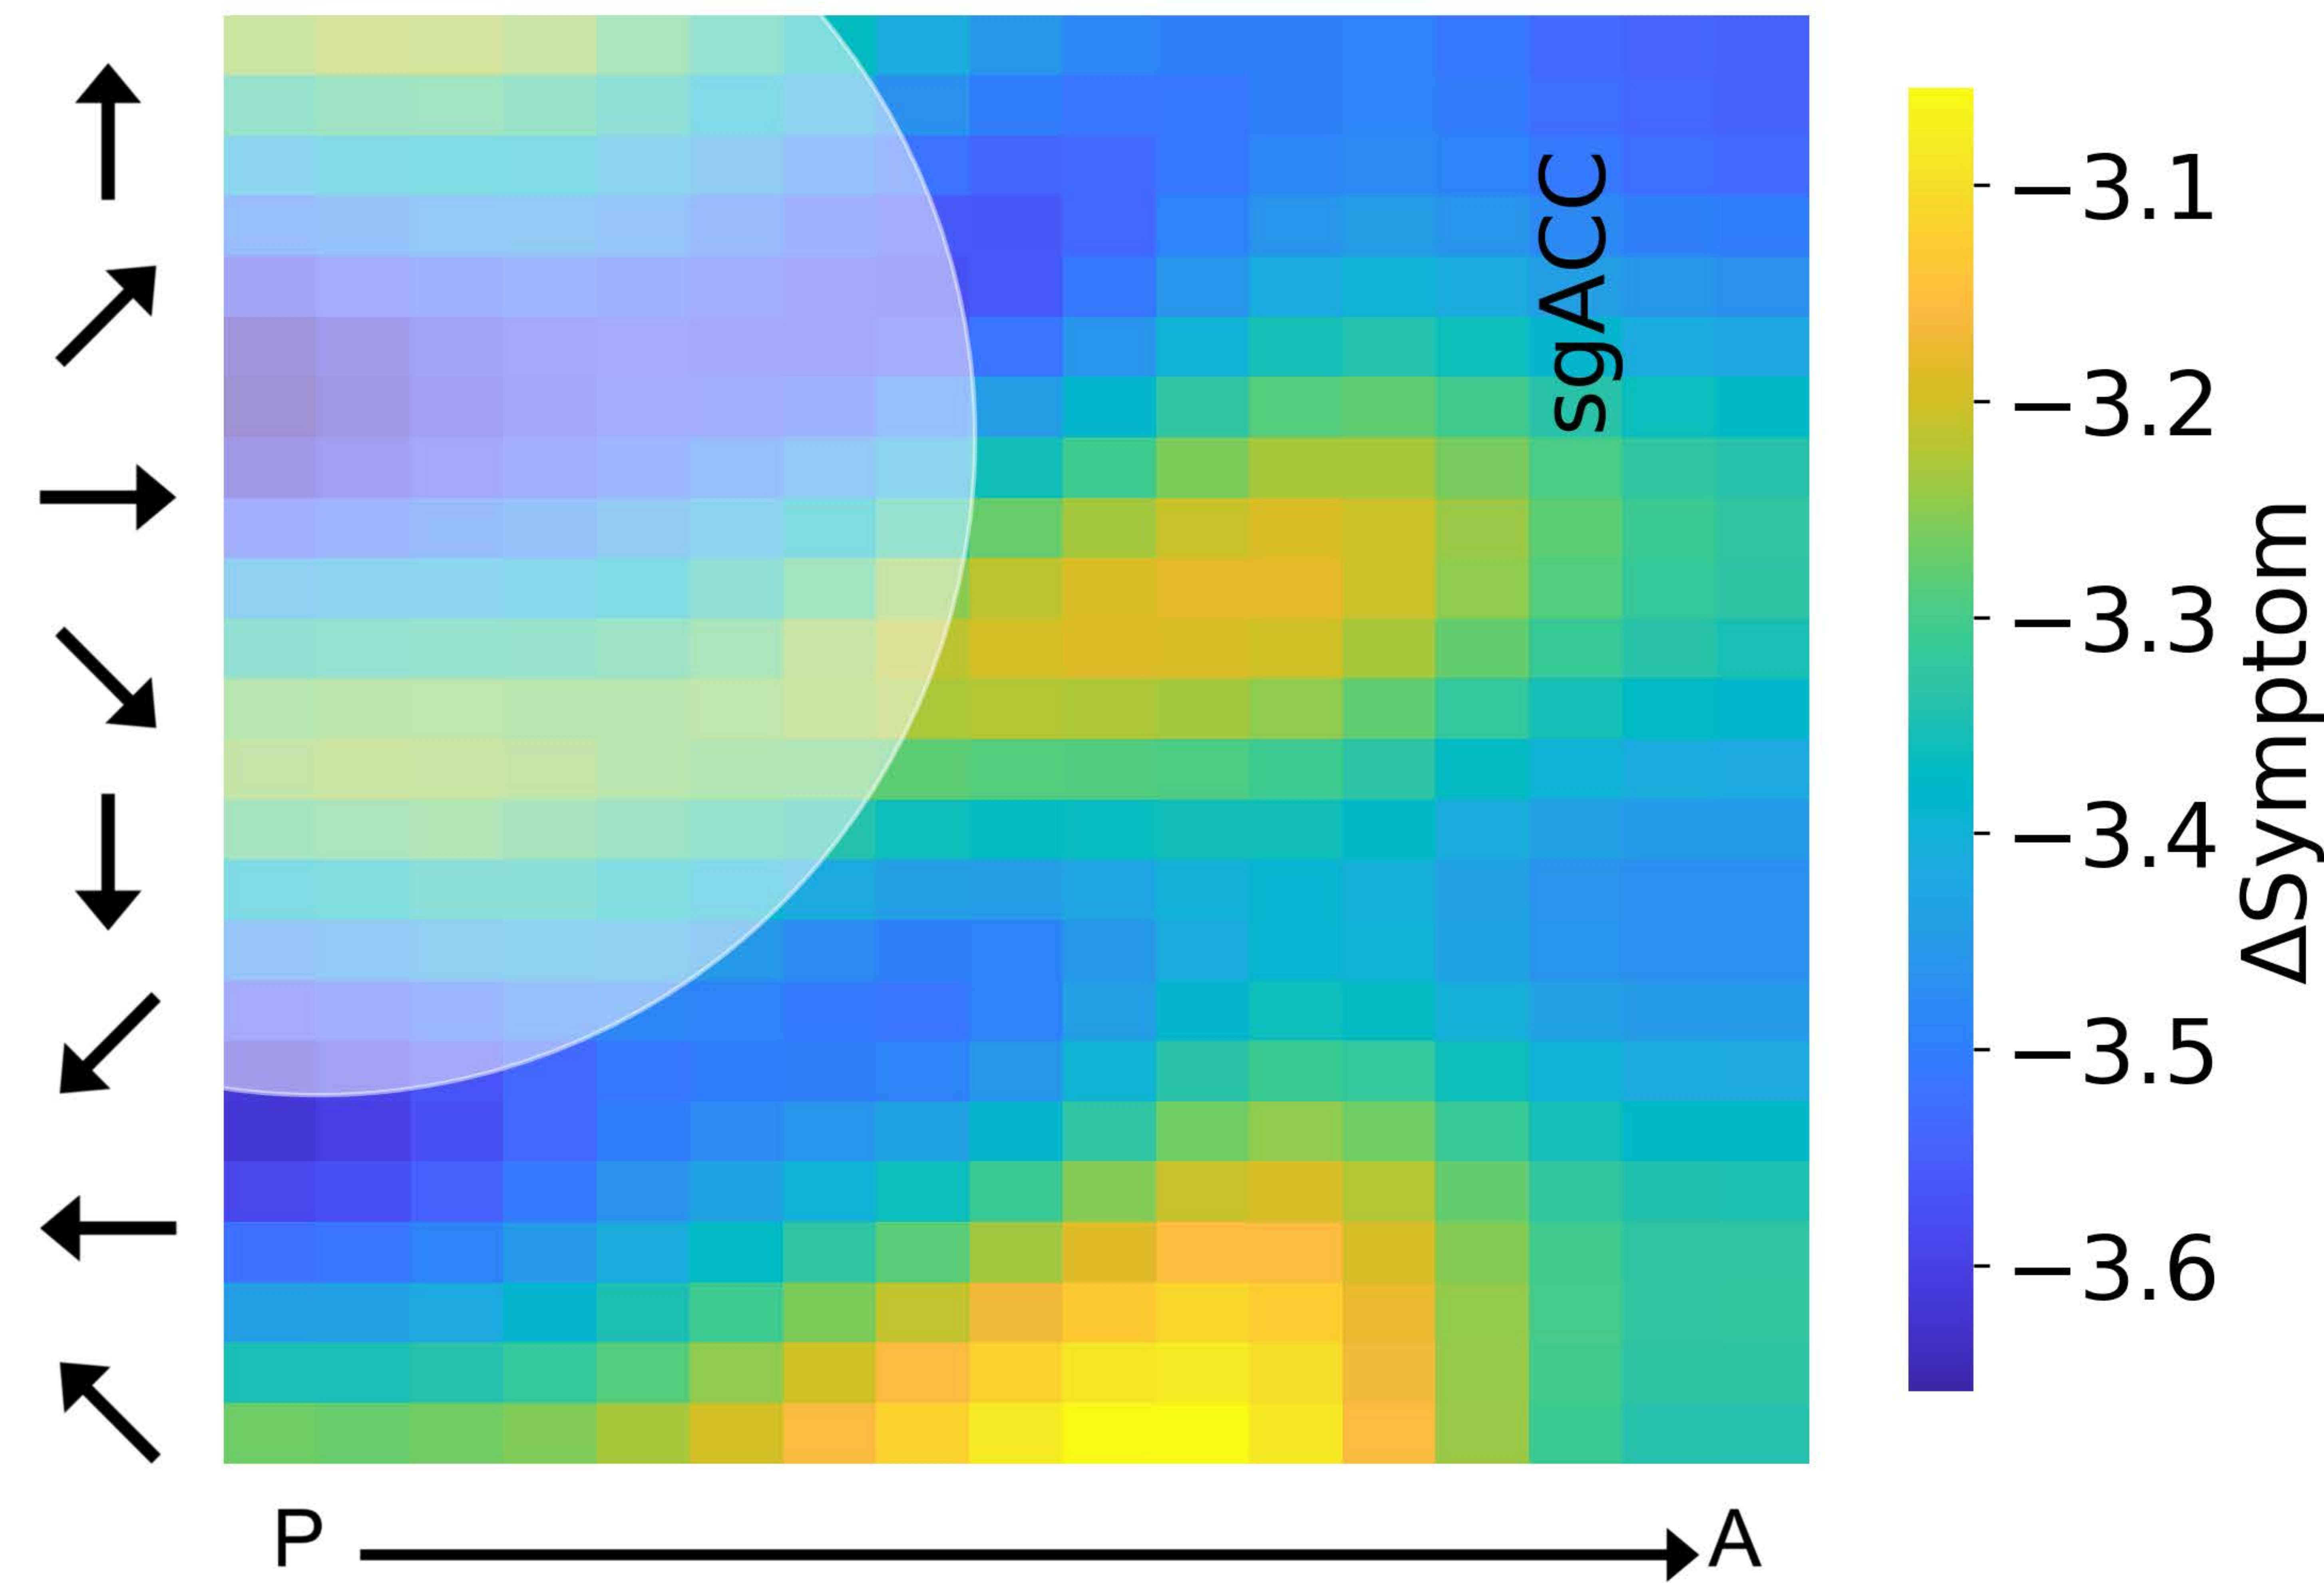



# NDARLF826BAB\_hamd\_left\_dlpfc

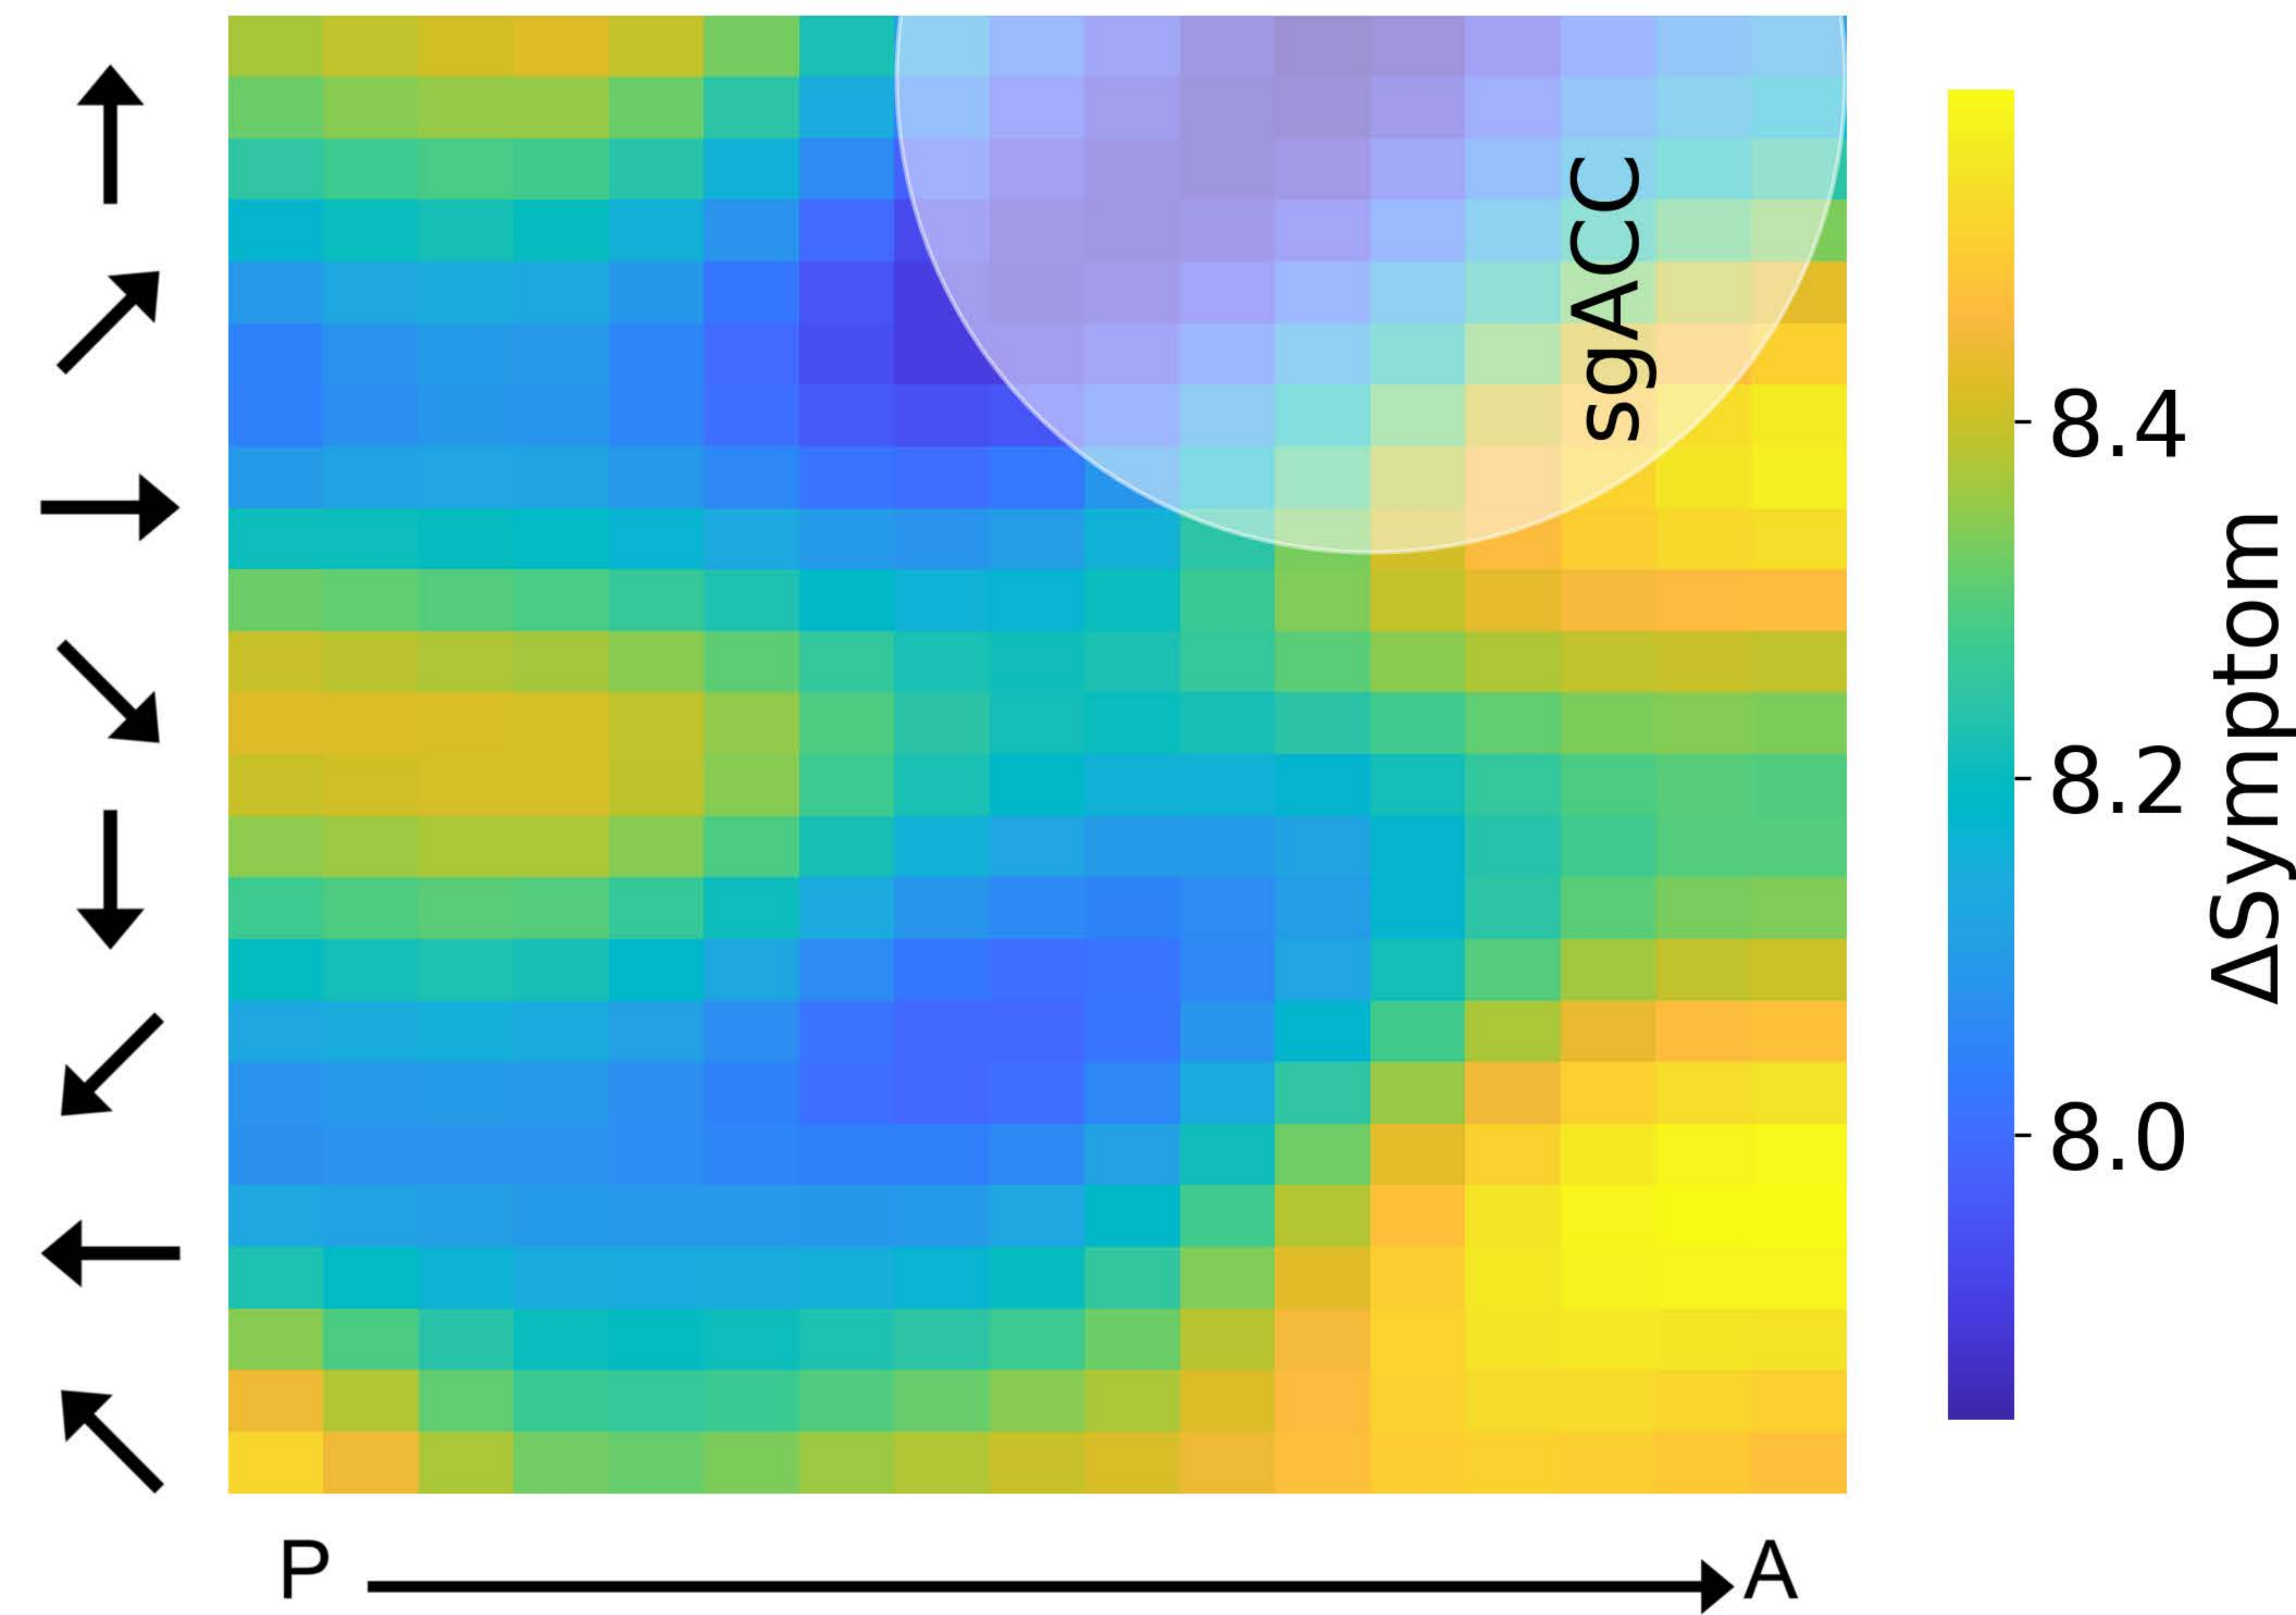



# NDARLM890ELE\_hamd\_left\_dlpfc

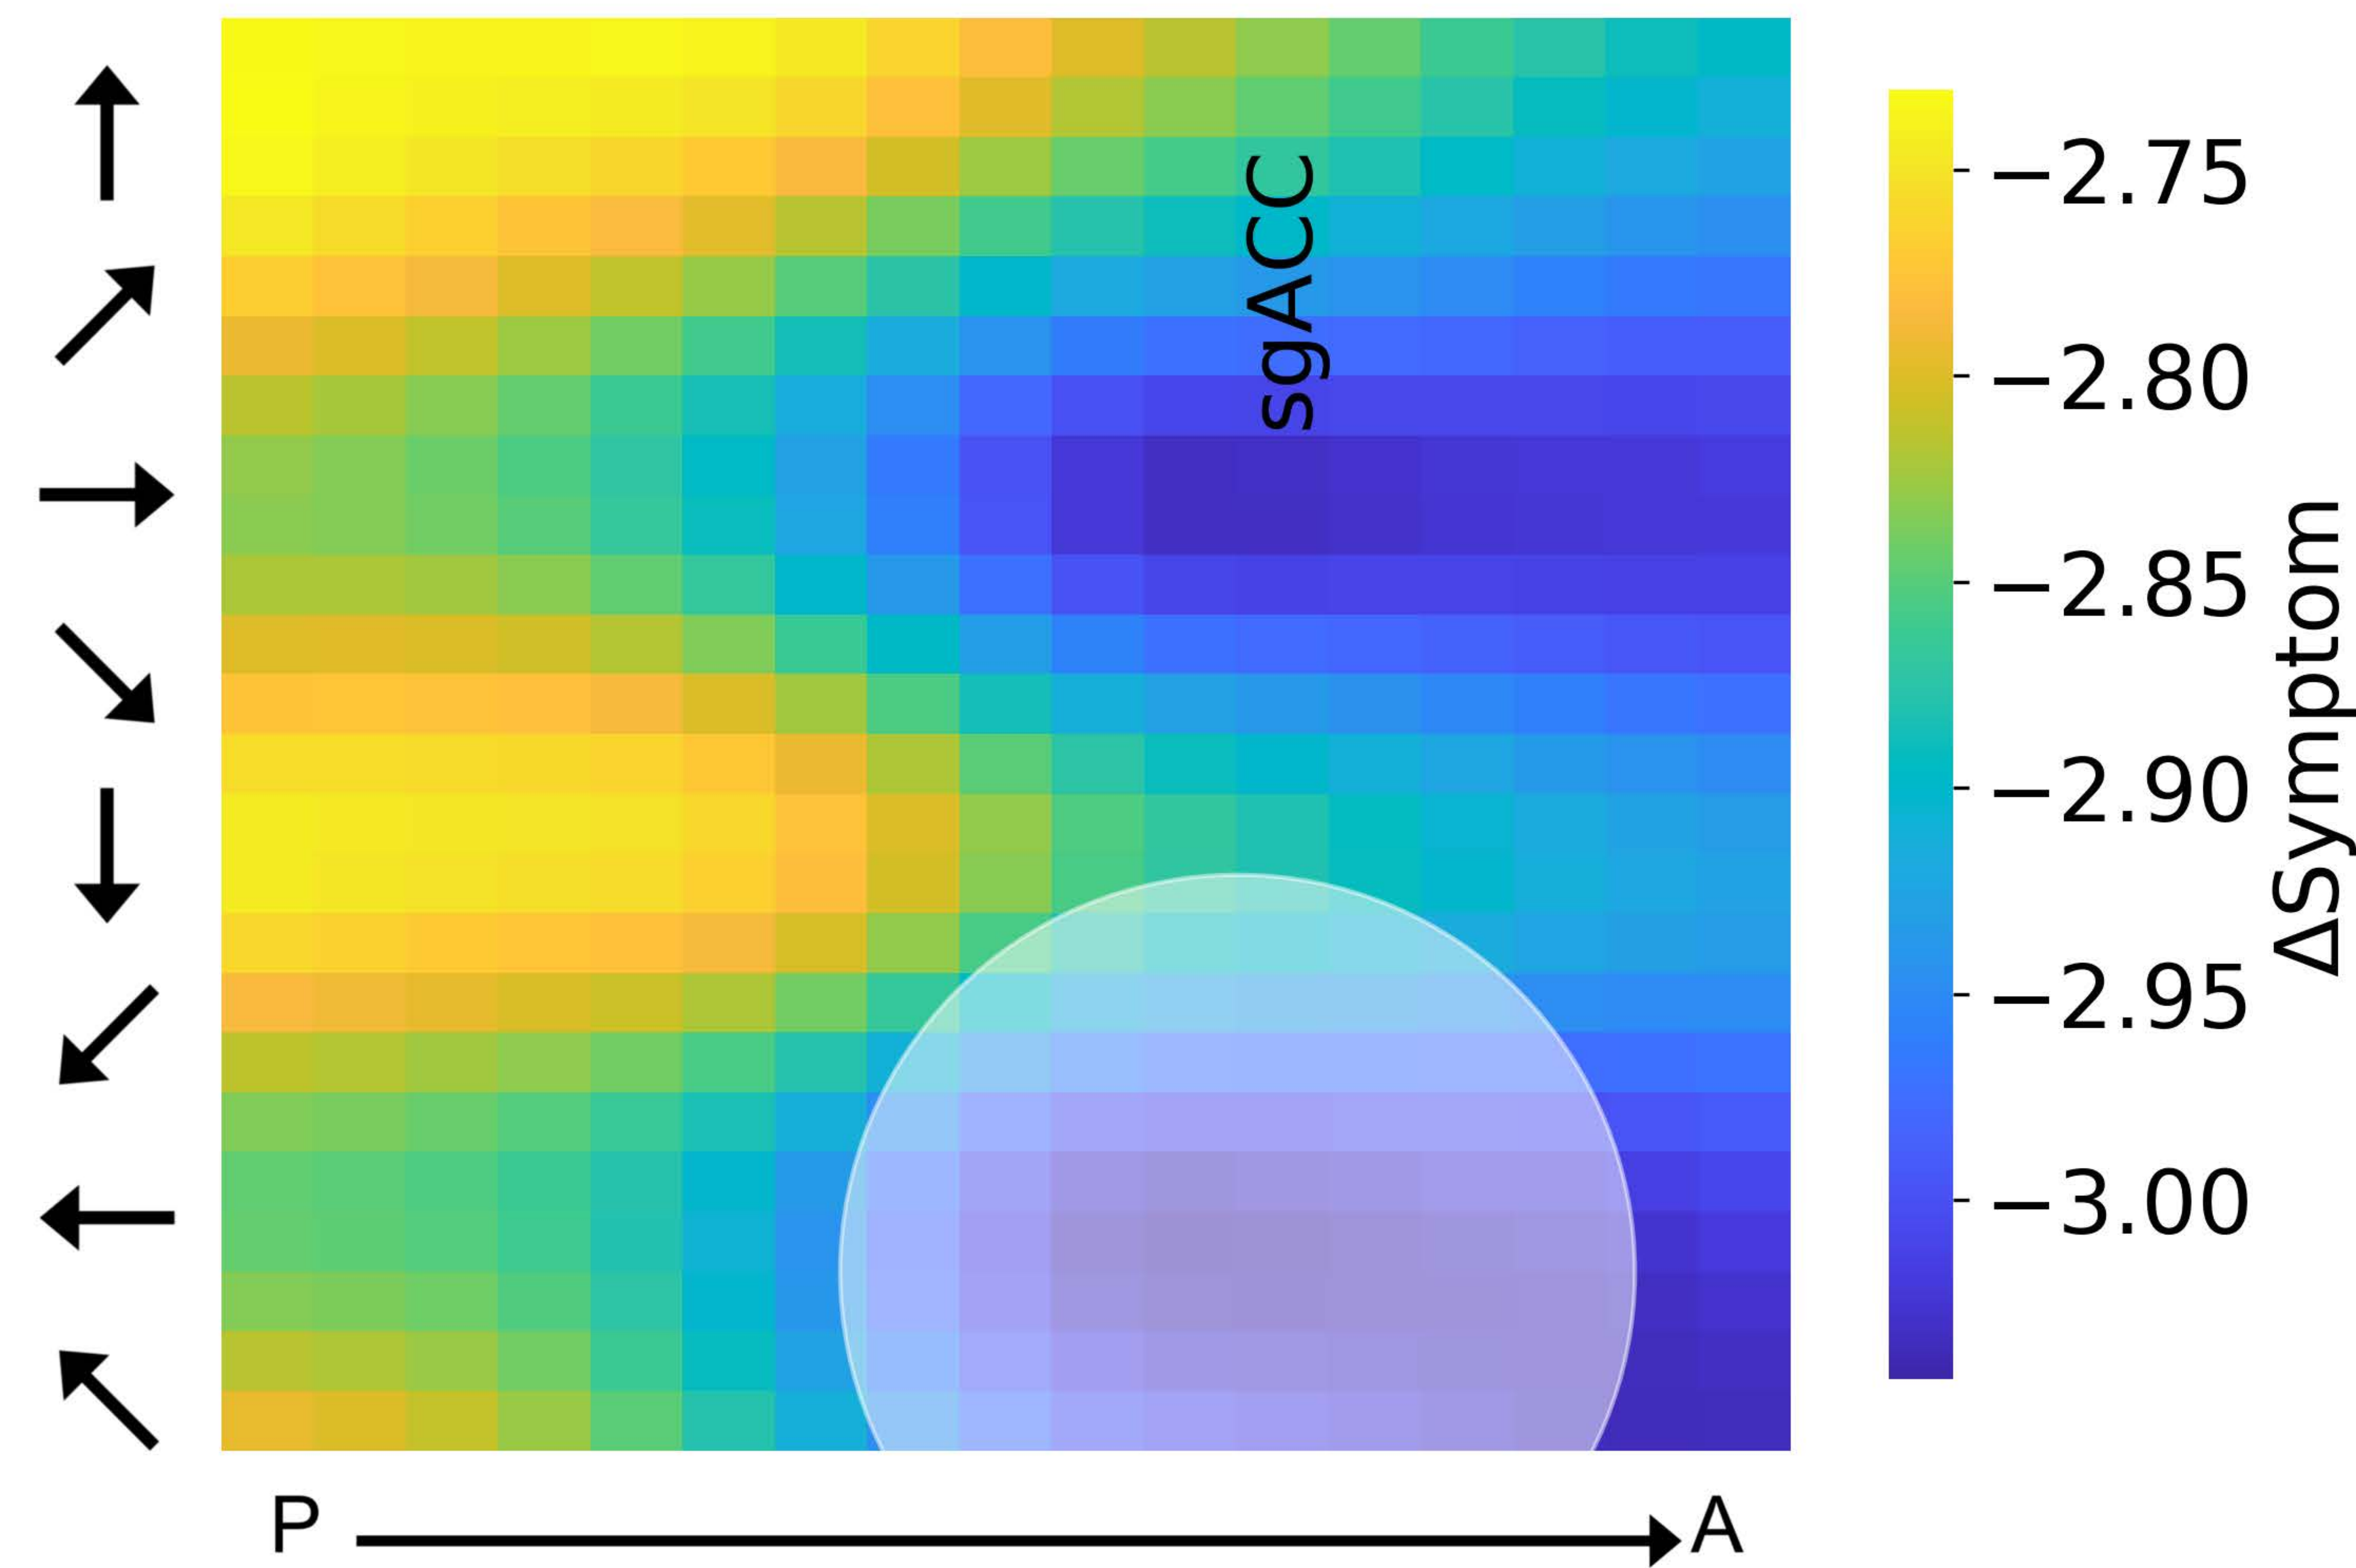



# INDARLZ935EEN\_hamd\_left\_dlpfc

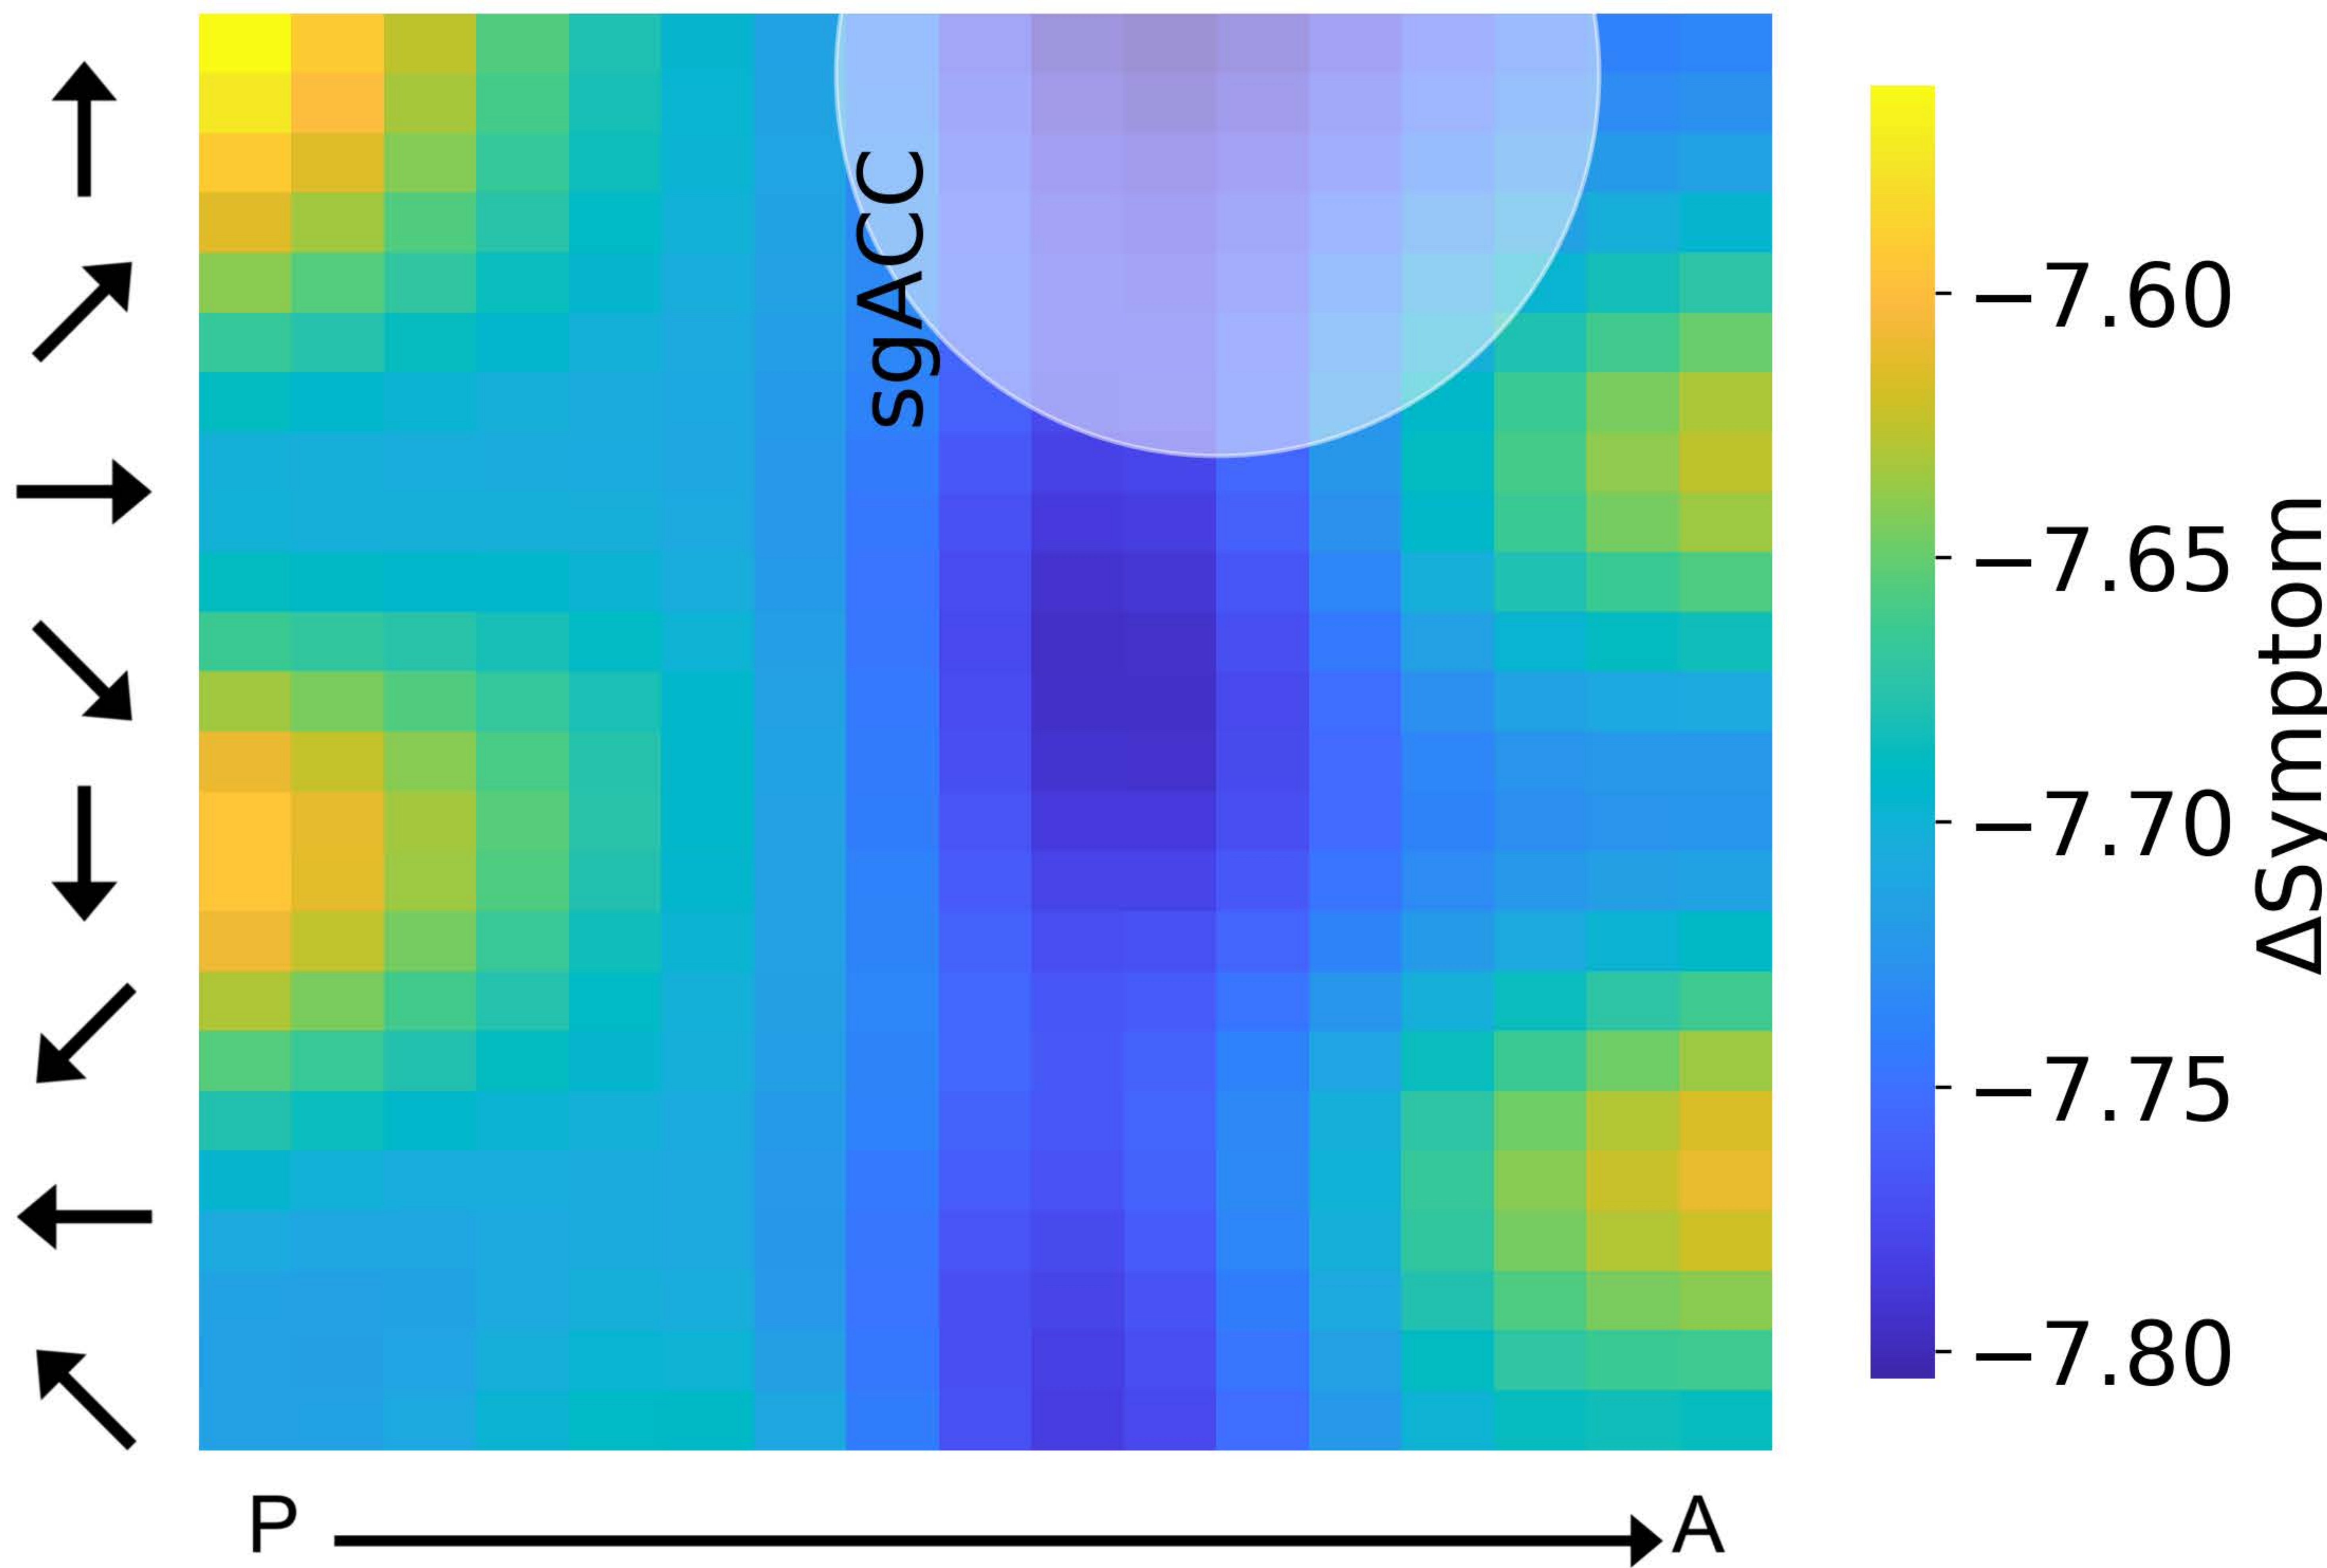



# NDARMA155ATG\_hamd\_left\_dlpfc

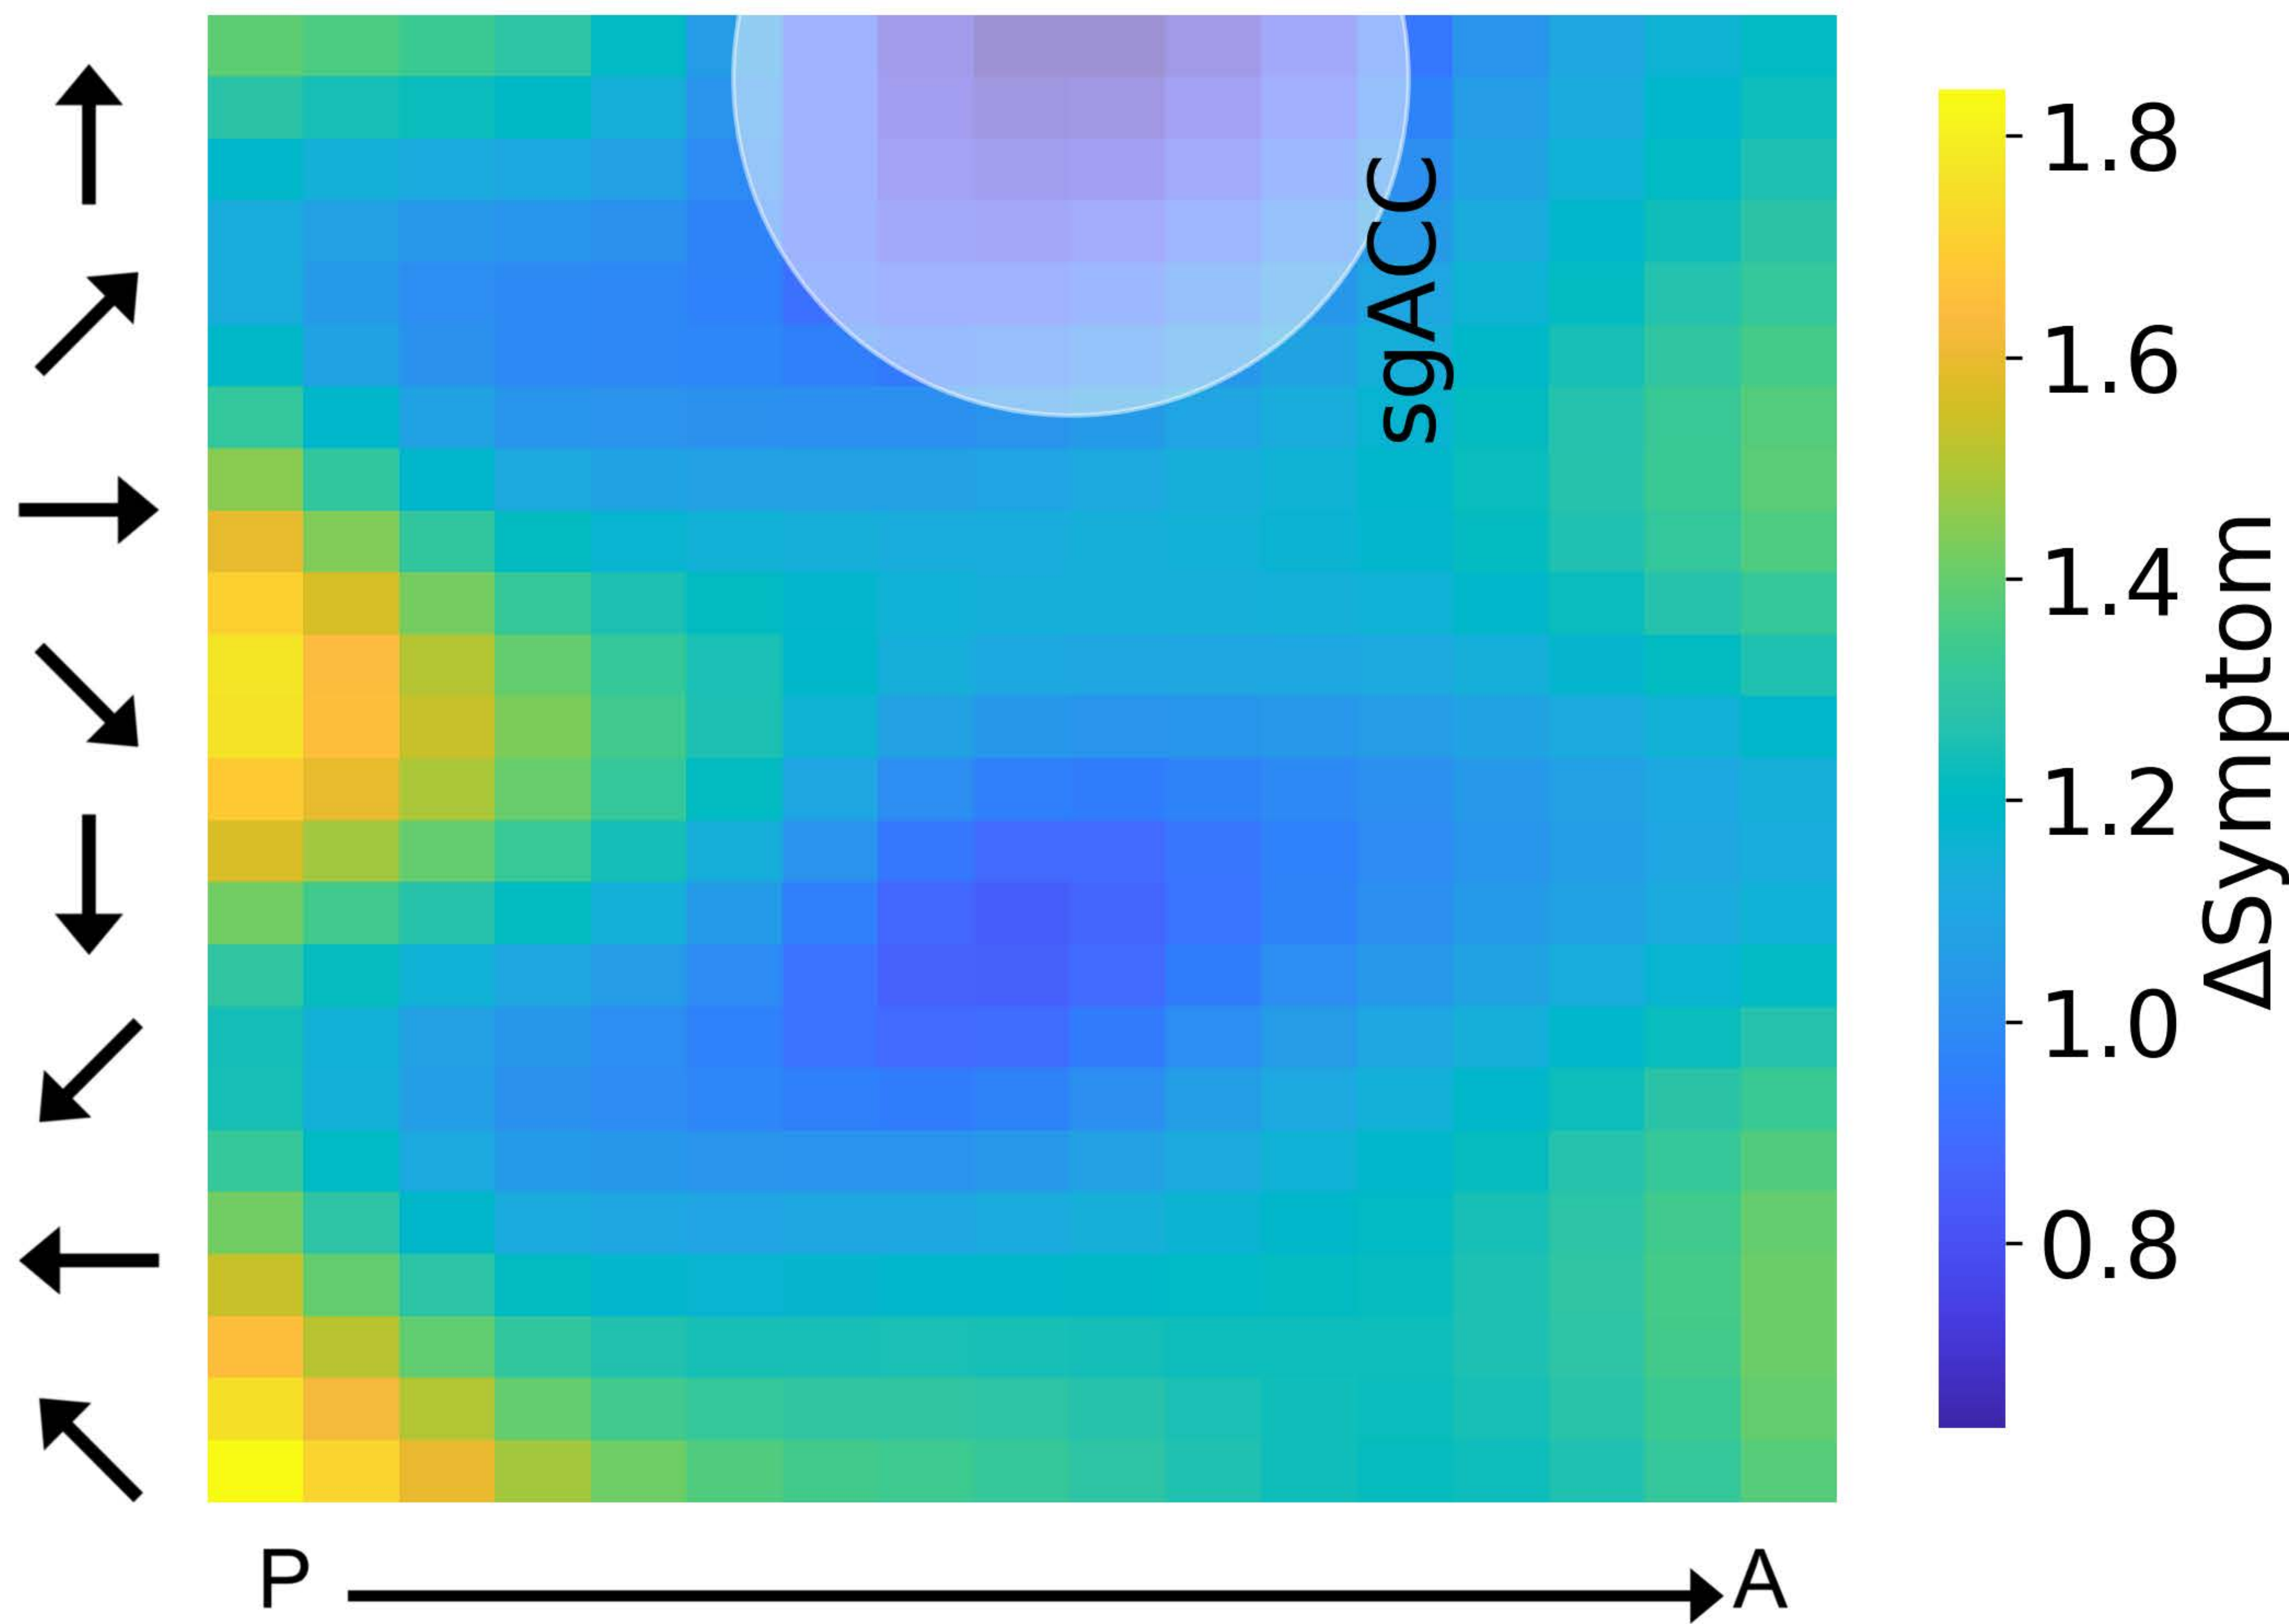



# NDARMB943VPJ\_hamd\_left\_dlpfc

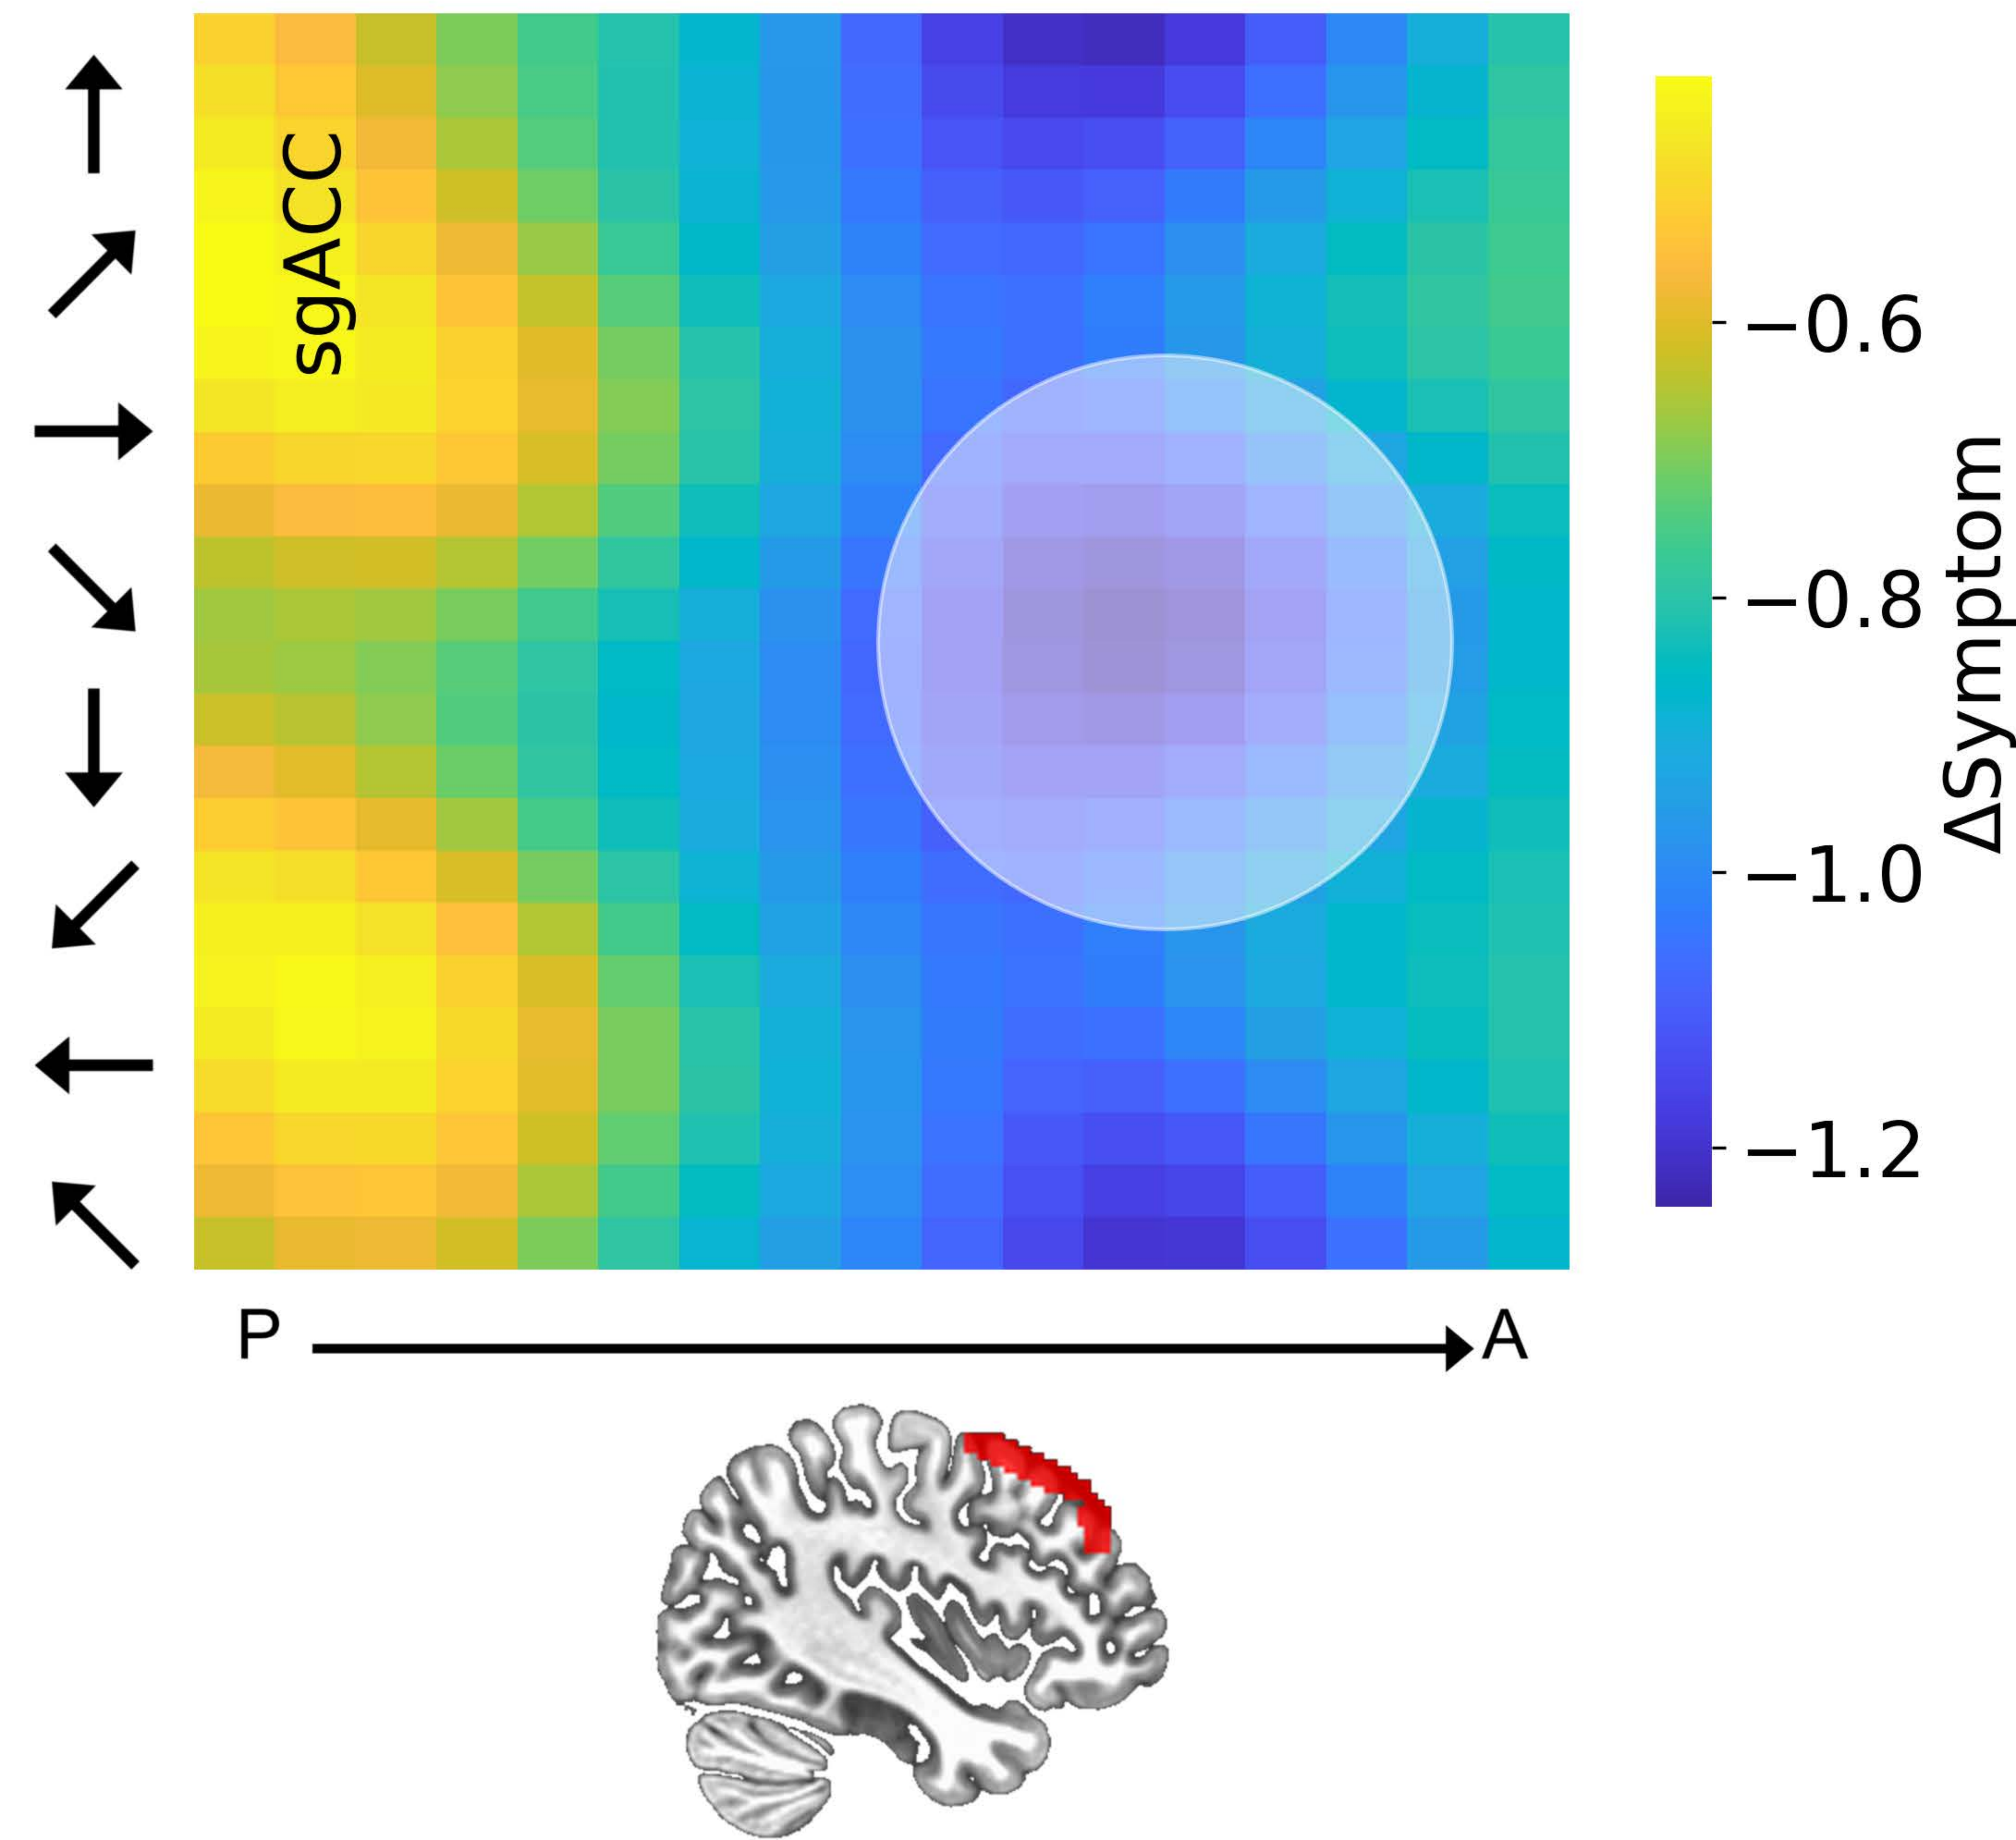



# NDARMD016CB8\_hamd\_left\_dlpfc

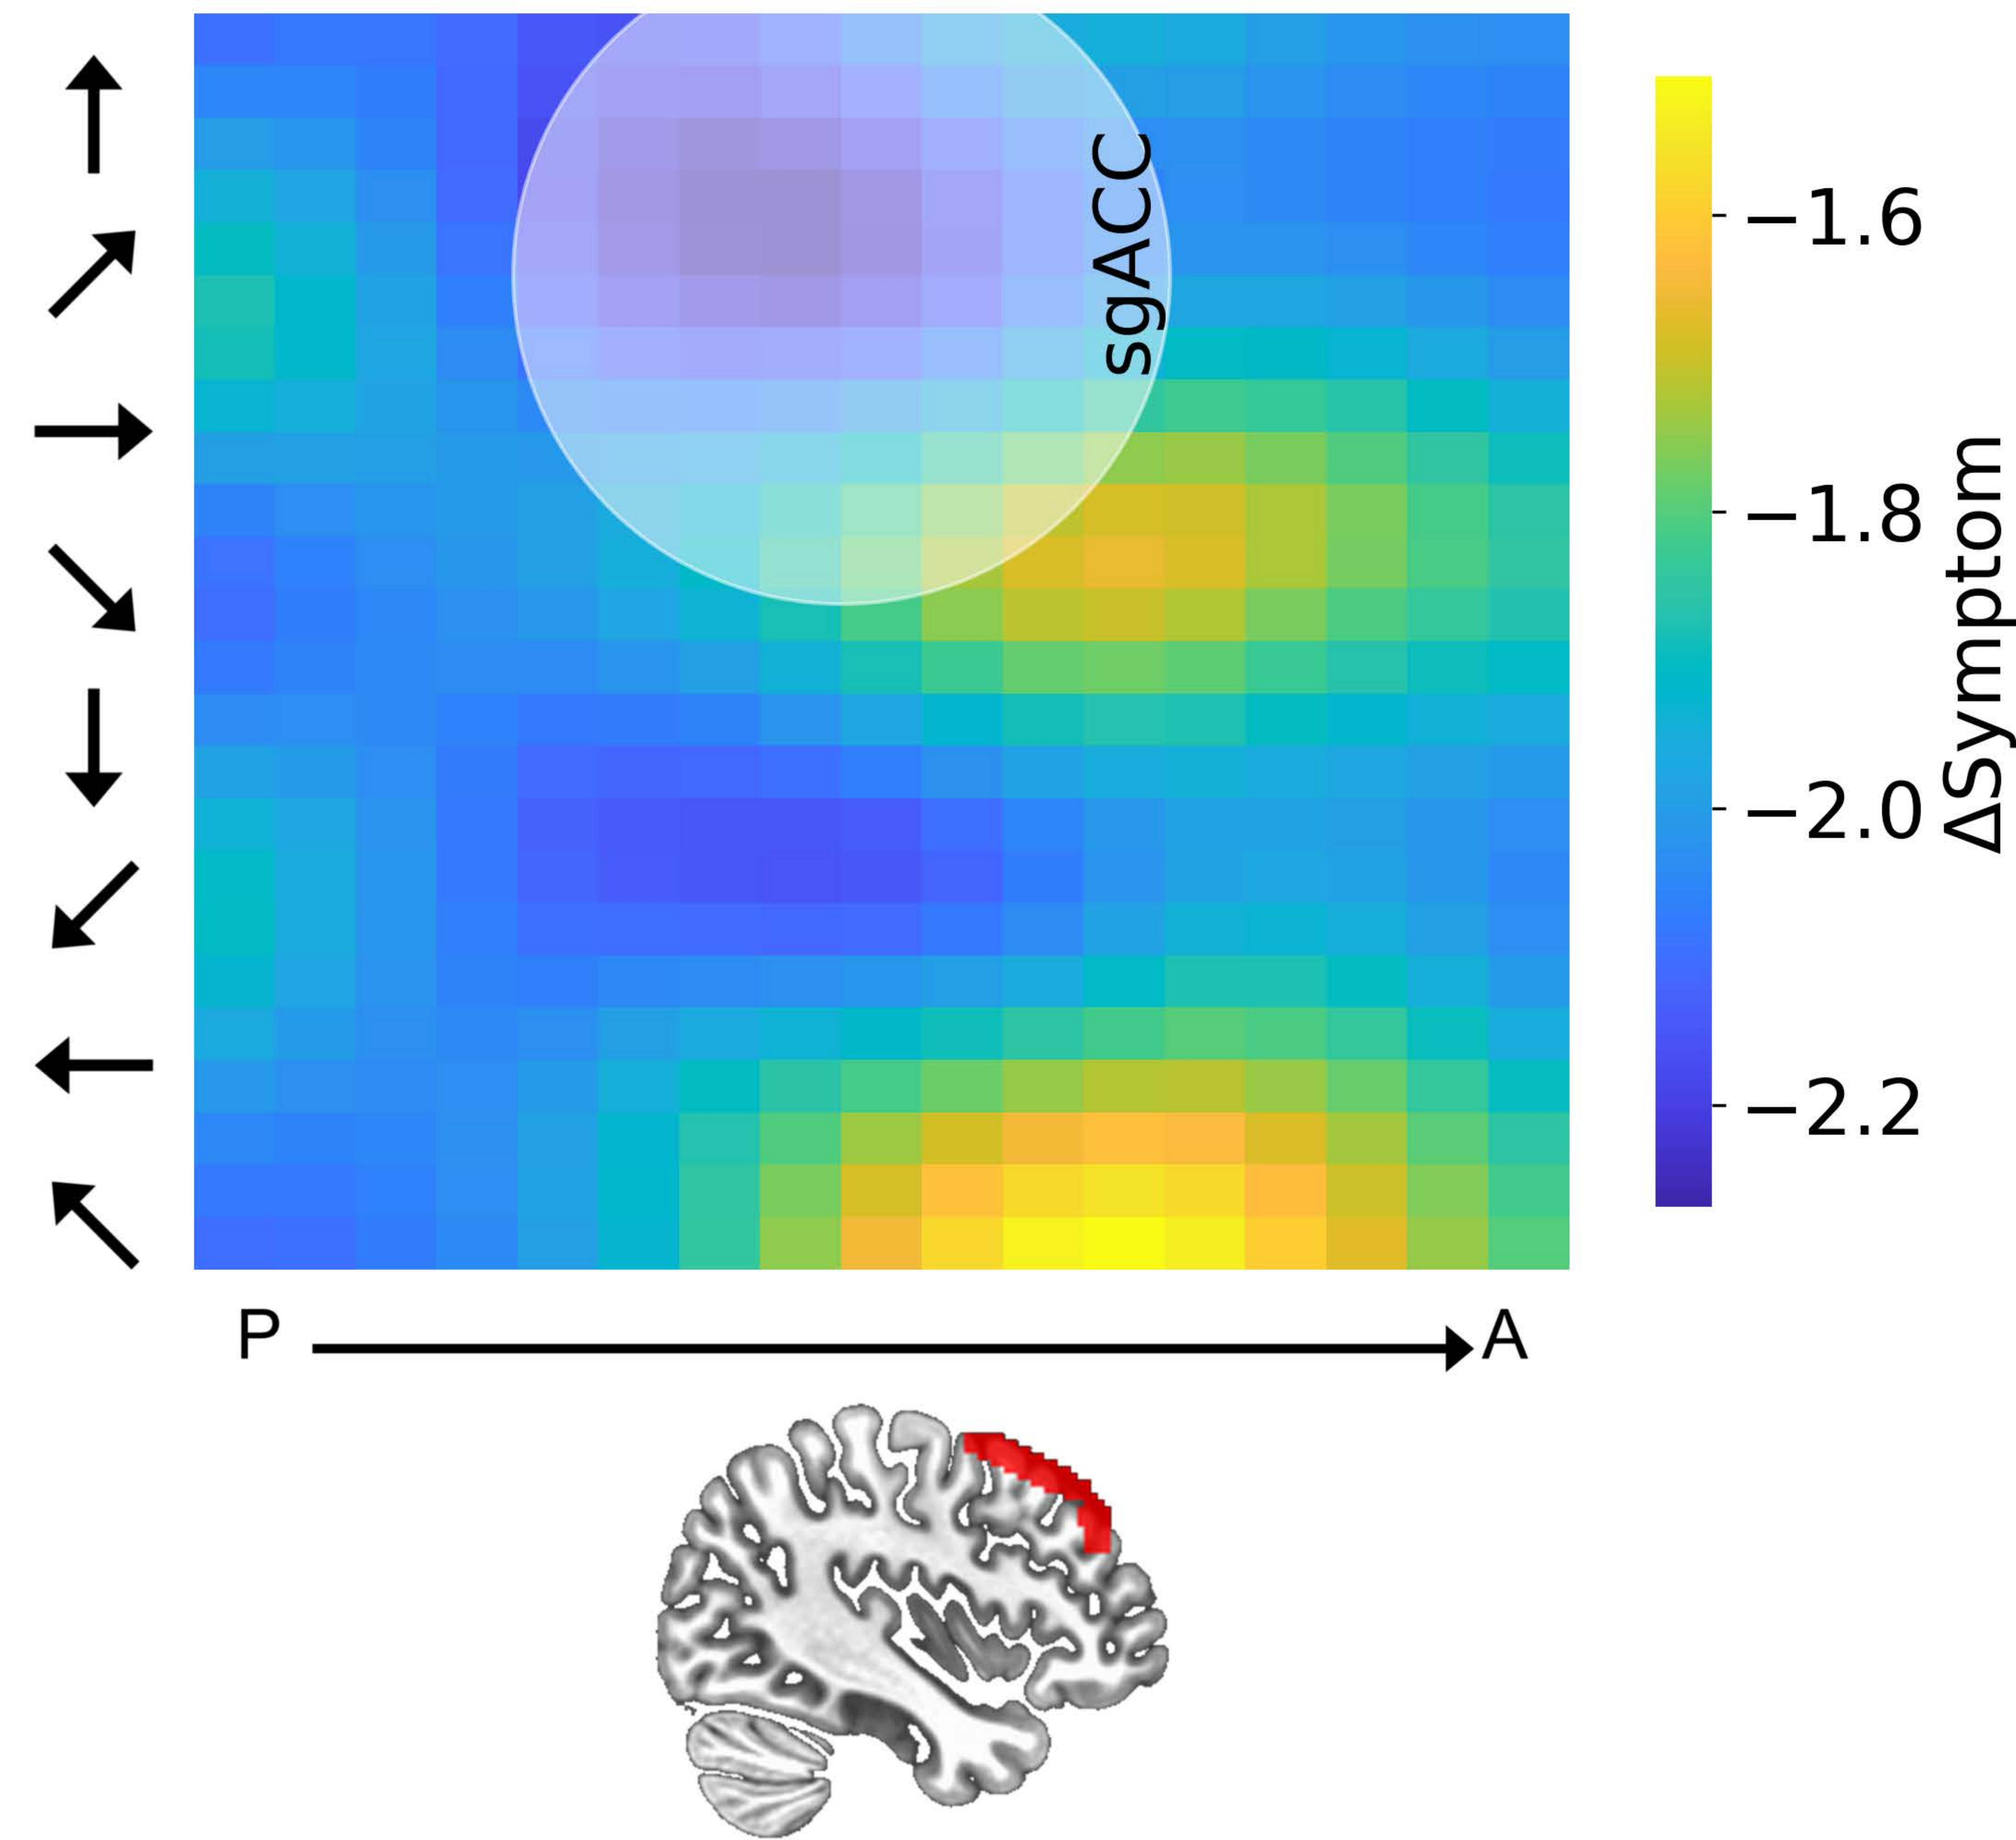



# NDARMD601CTU\_hamd\_left\_dlpfc

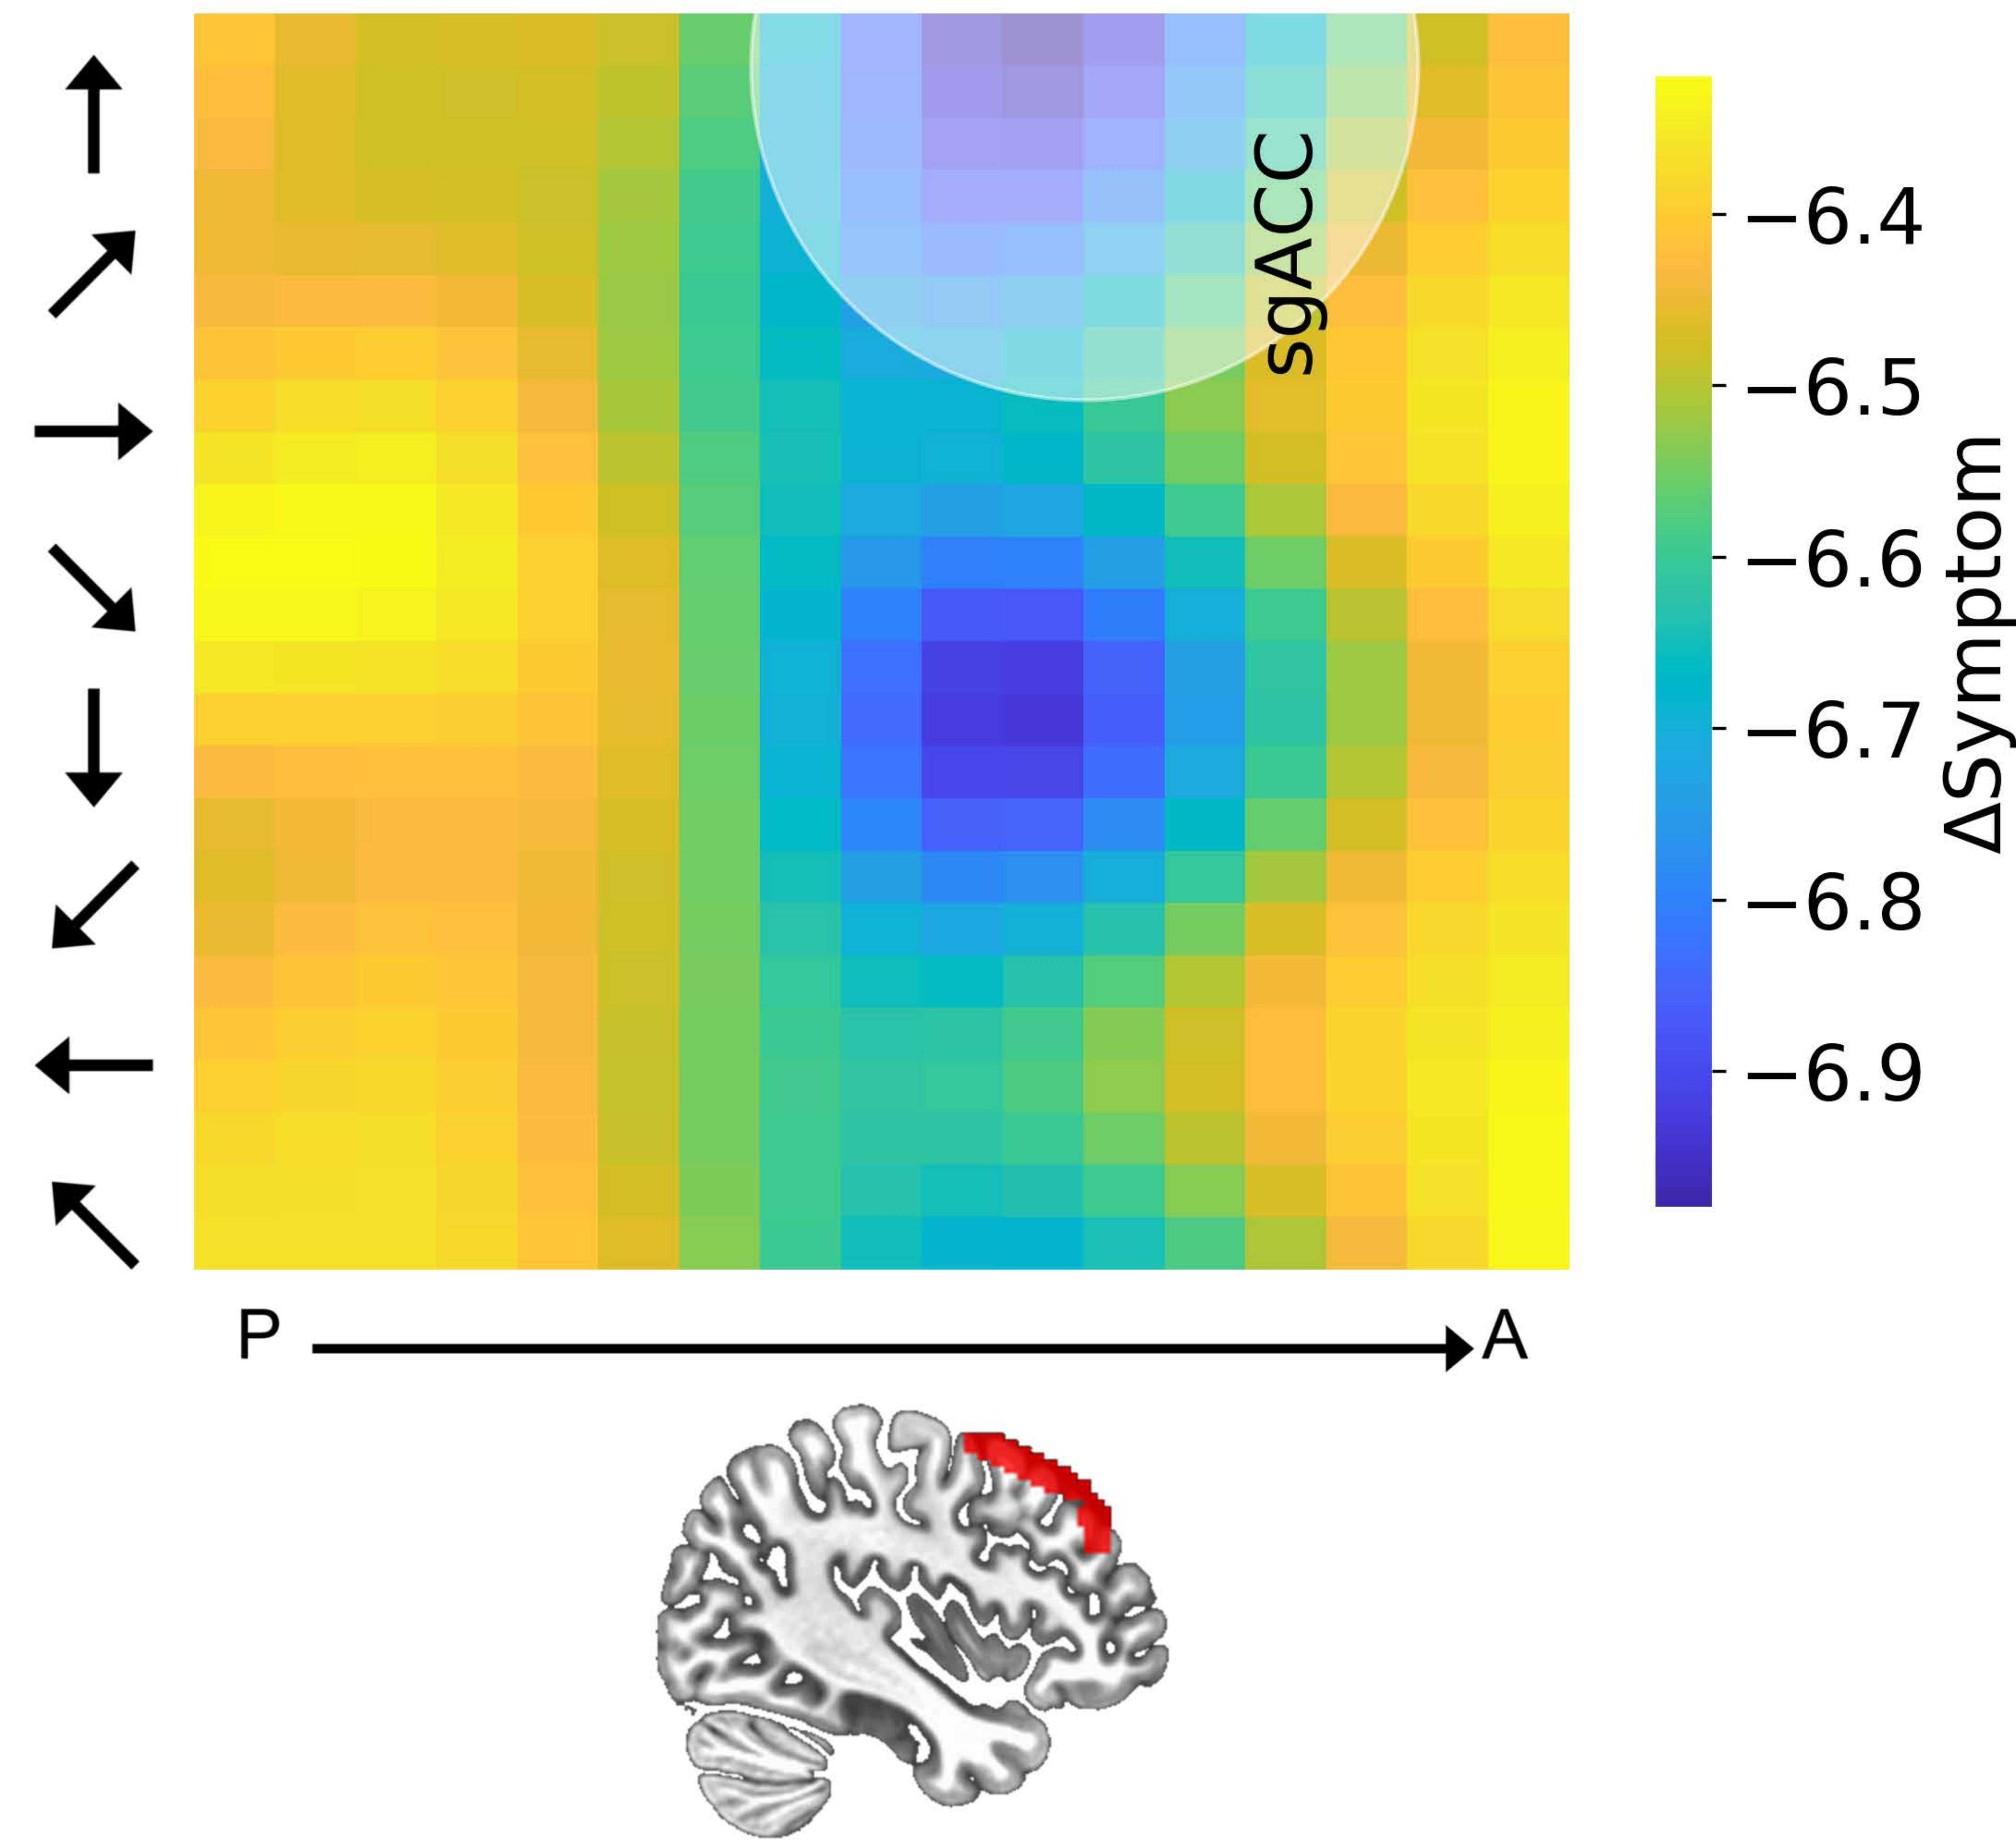



# NDARME189AXP\_hamd\_left\_dlpfc

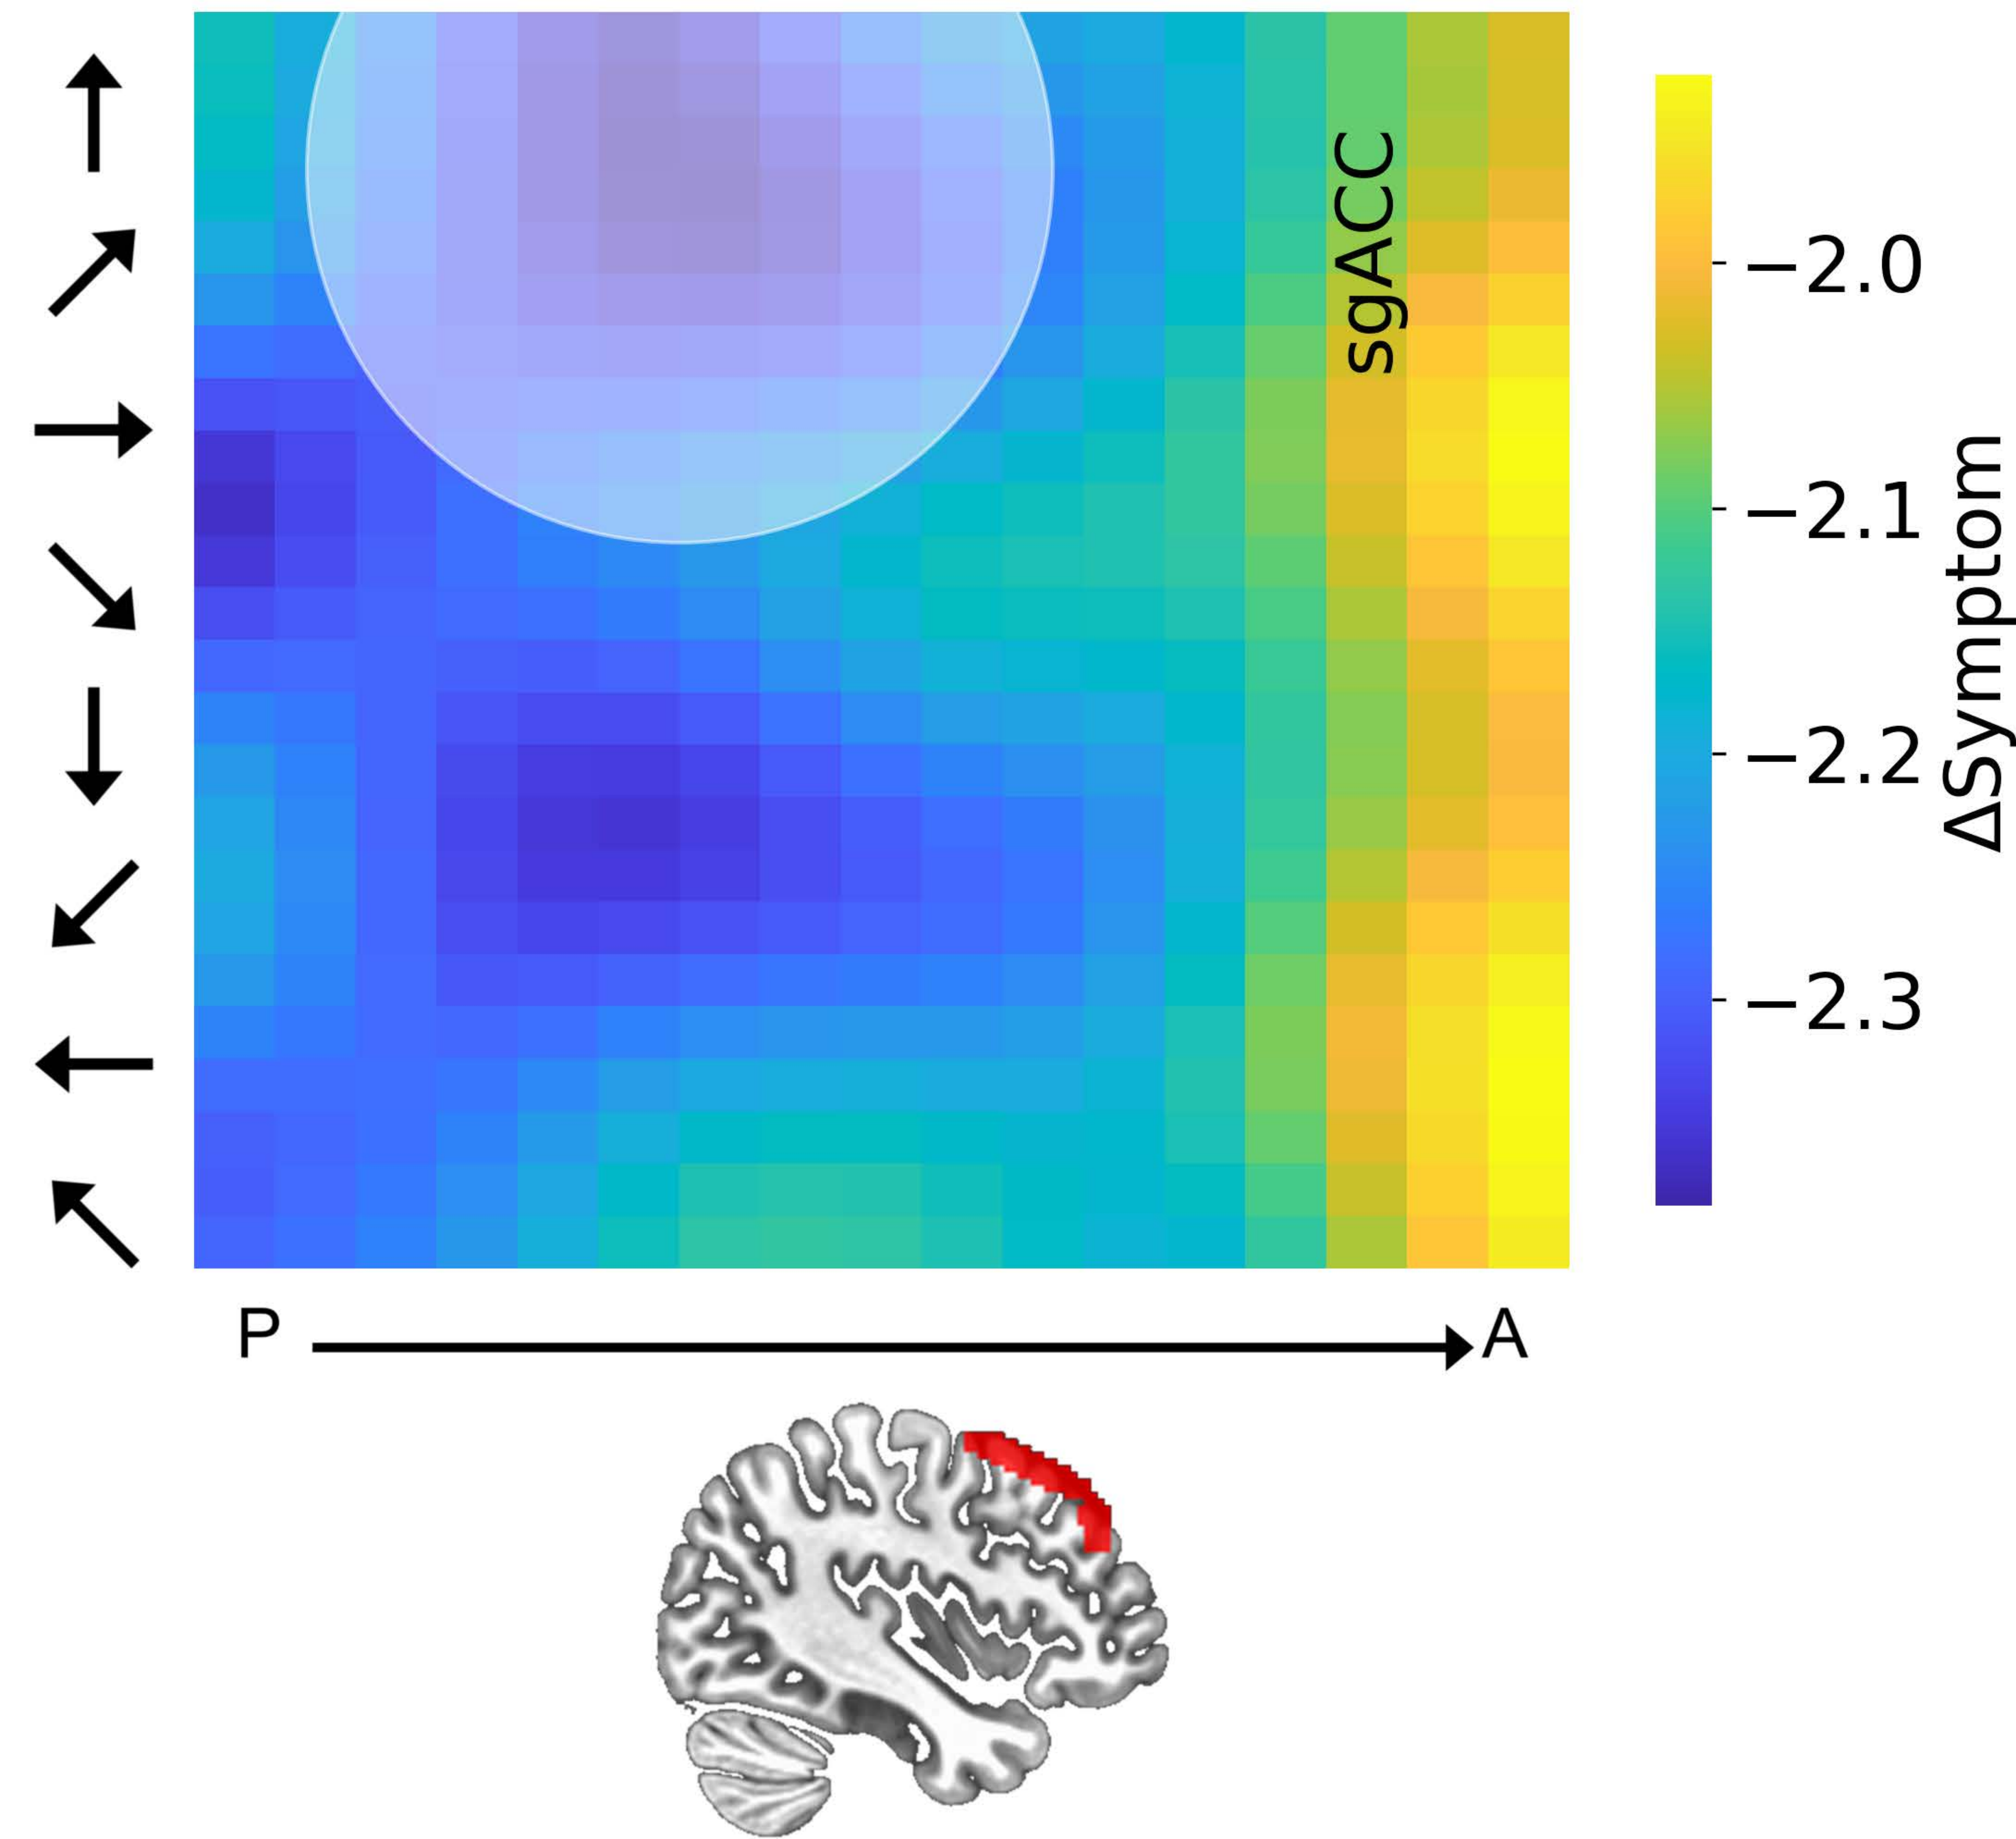



# NDARME335LZJ\_hamd\_left\_dlpfc

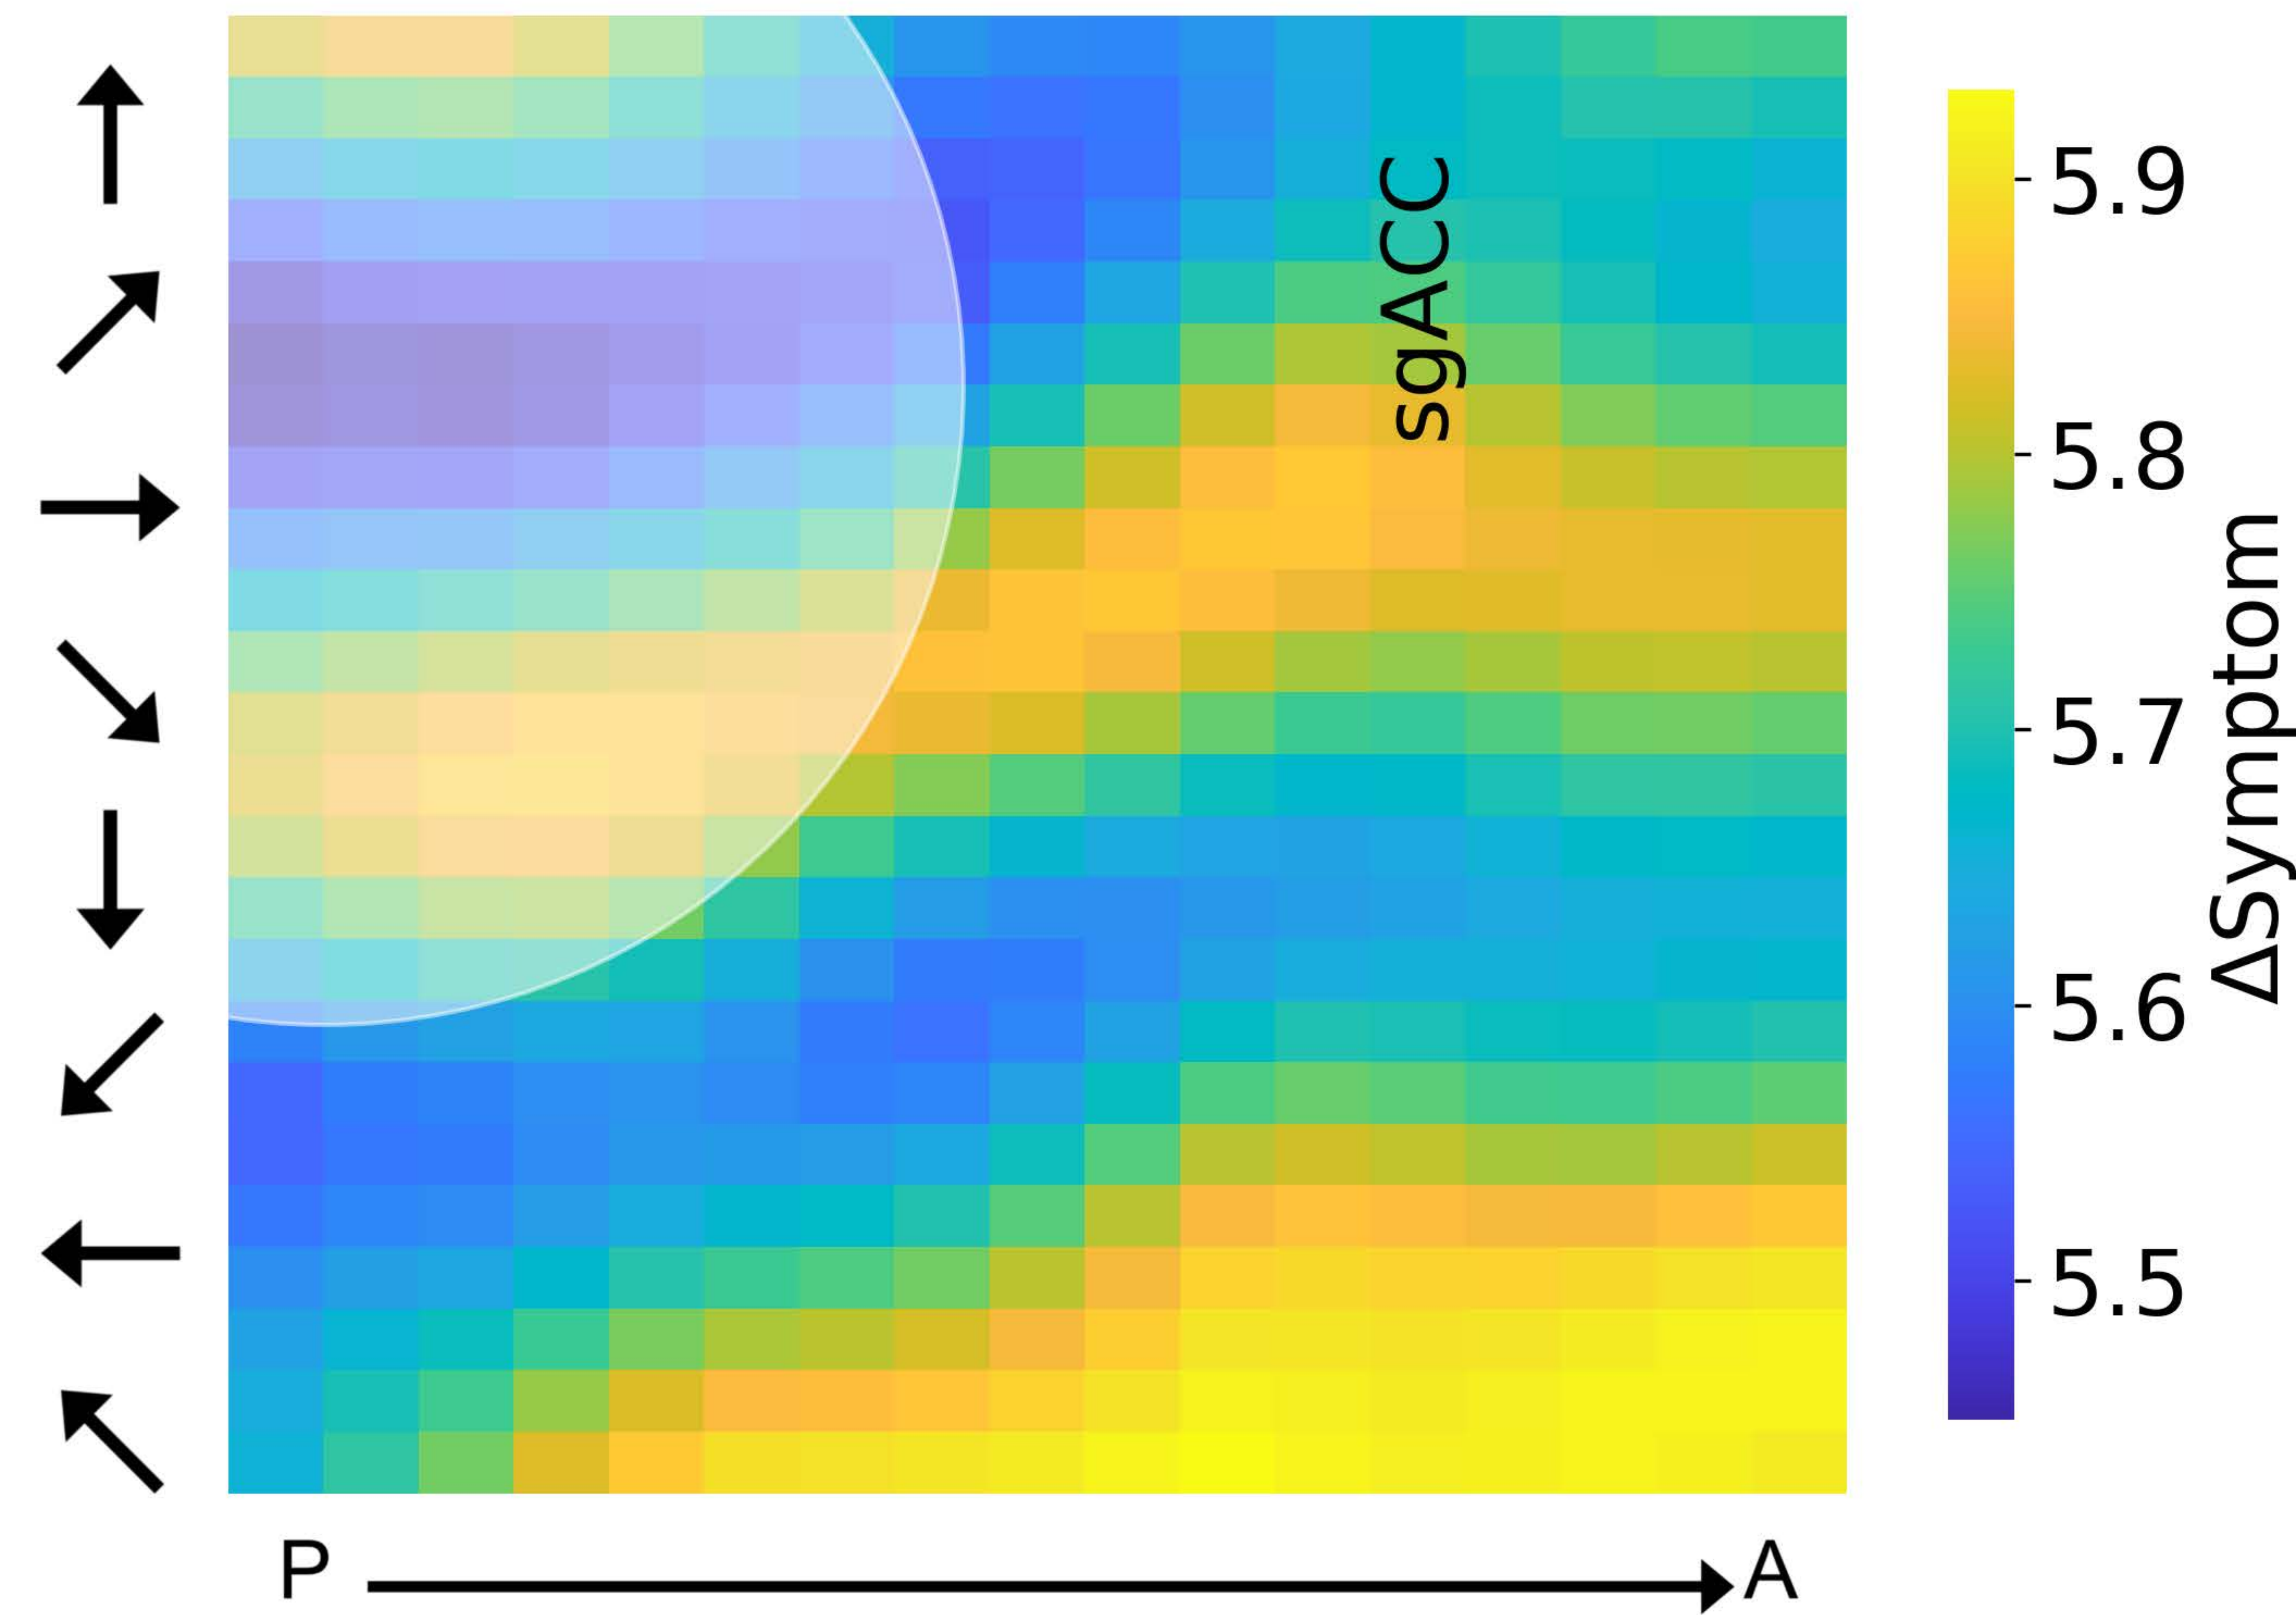



# NDARMF293AHT\_hamd\_left\_dlpfc

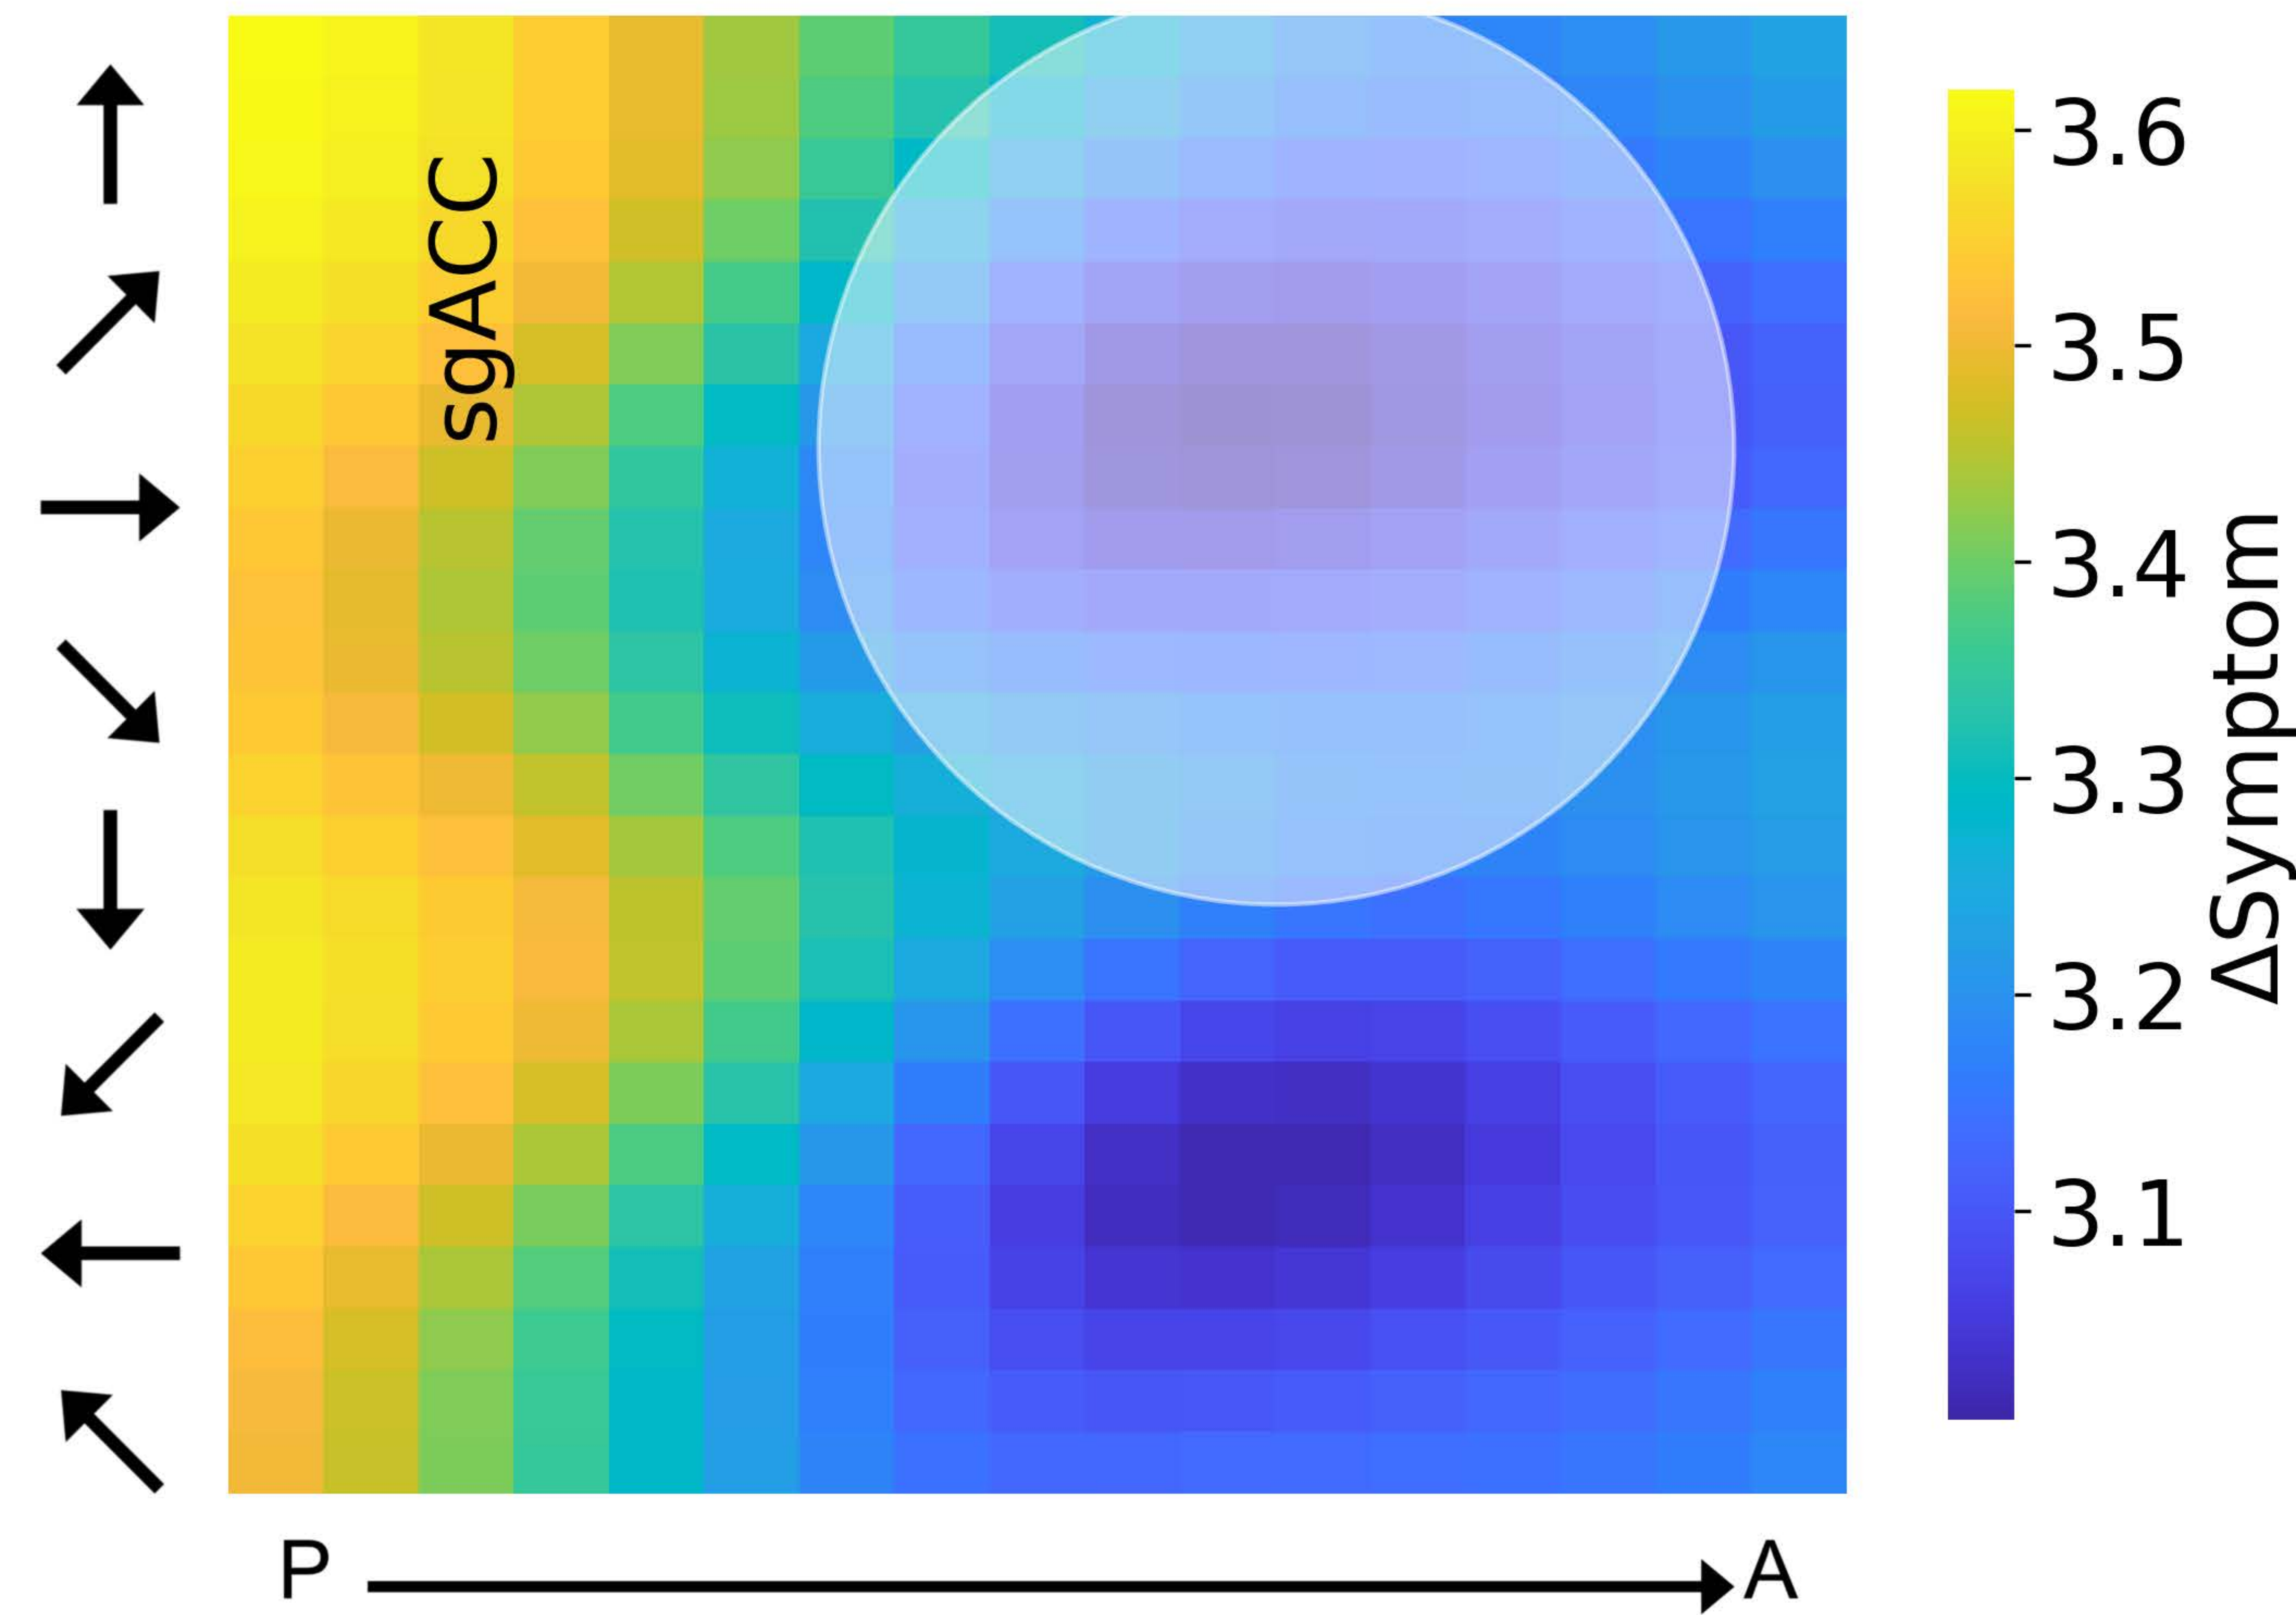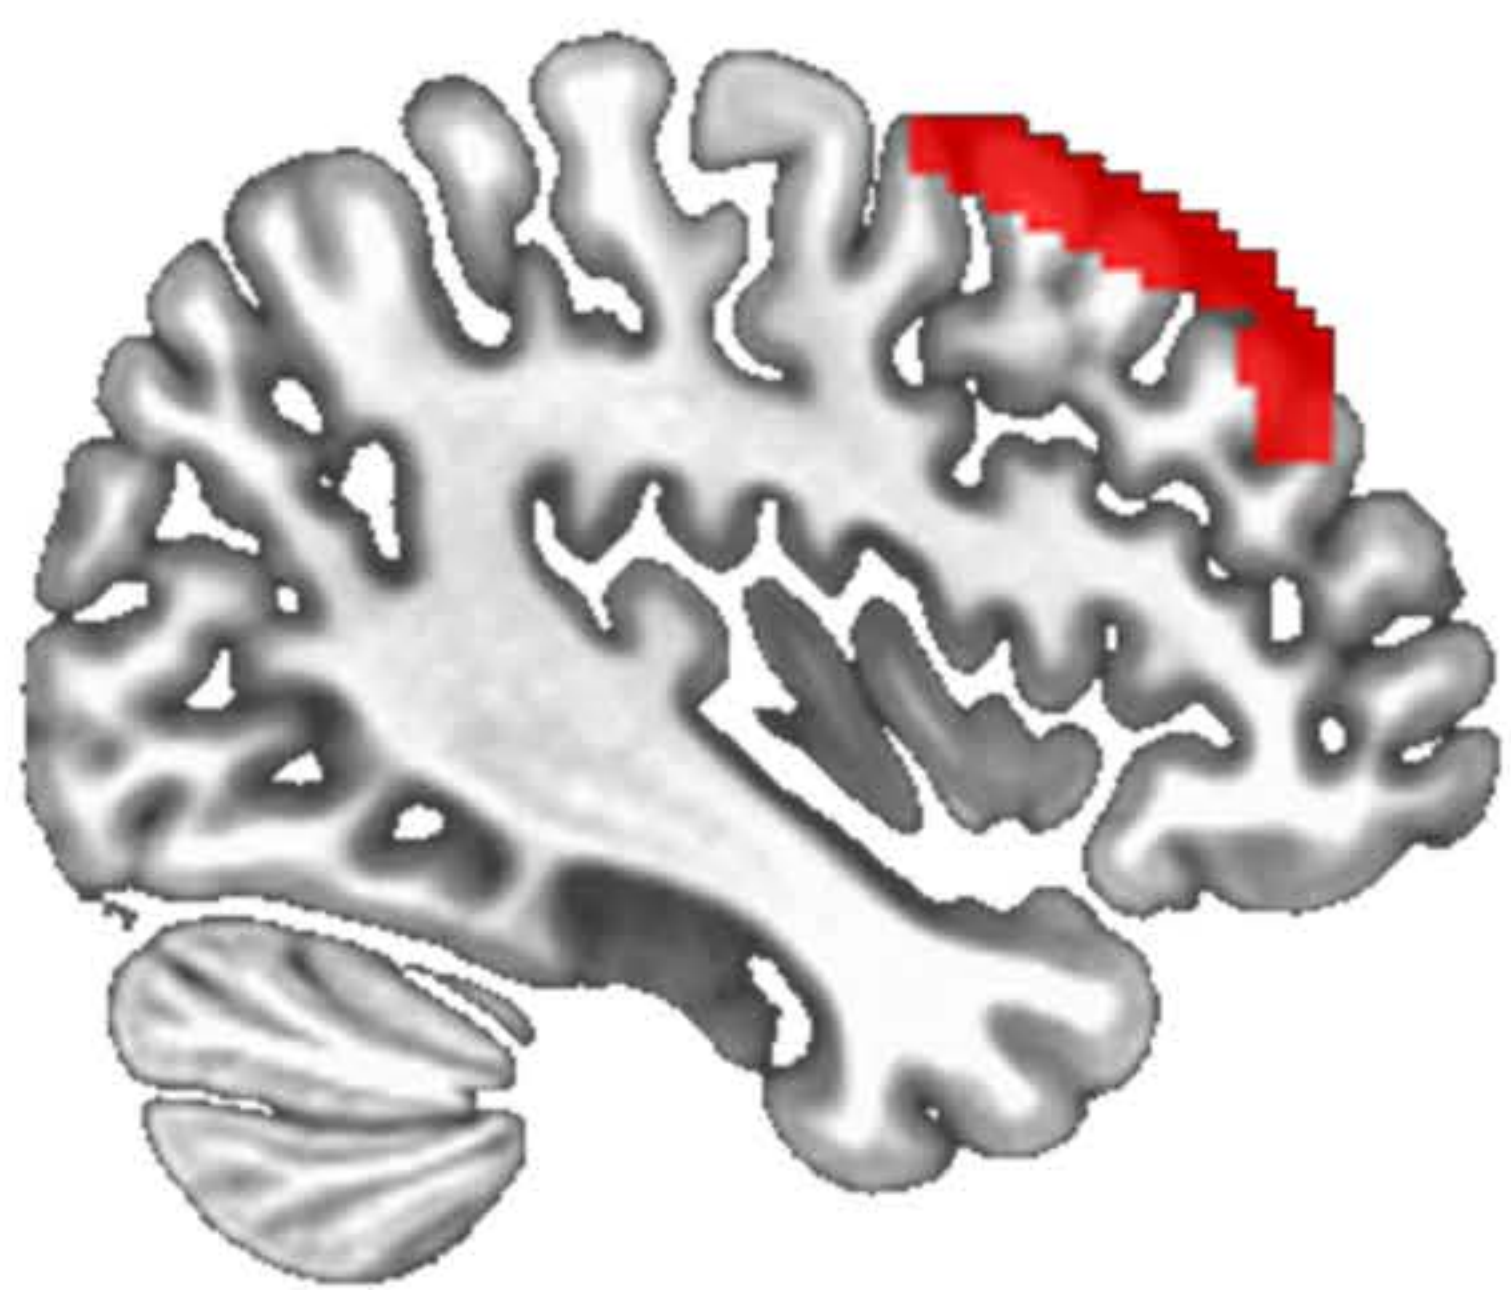



# NDARMK972BFE\_hamd\_left\_dlpfc

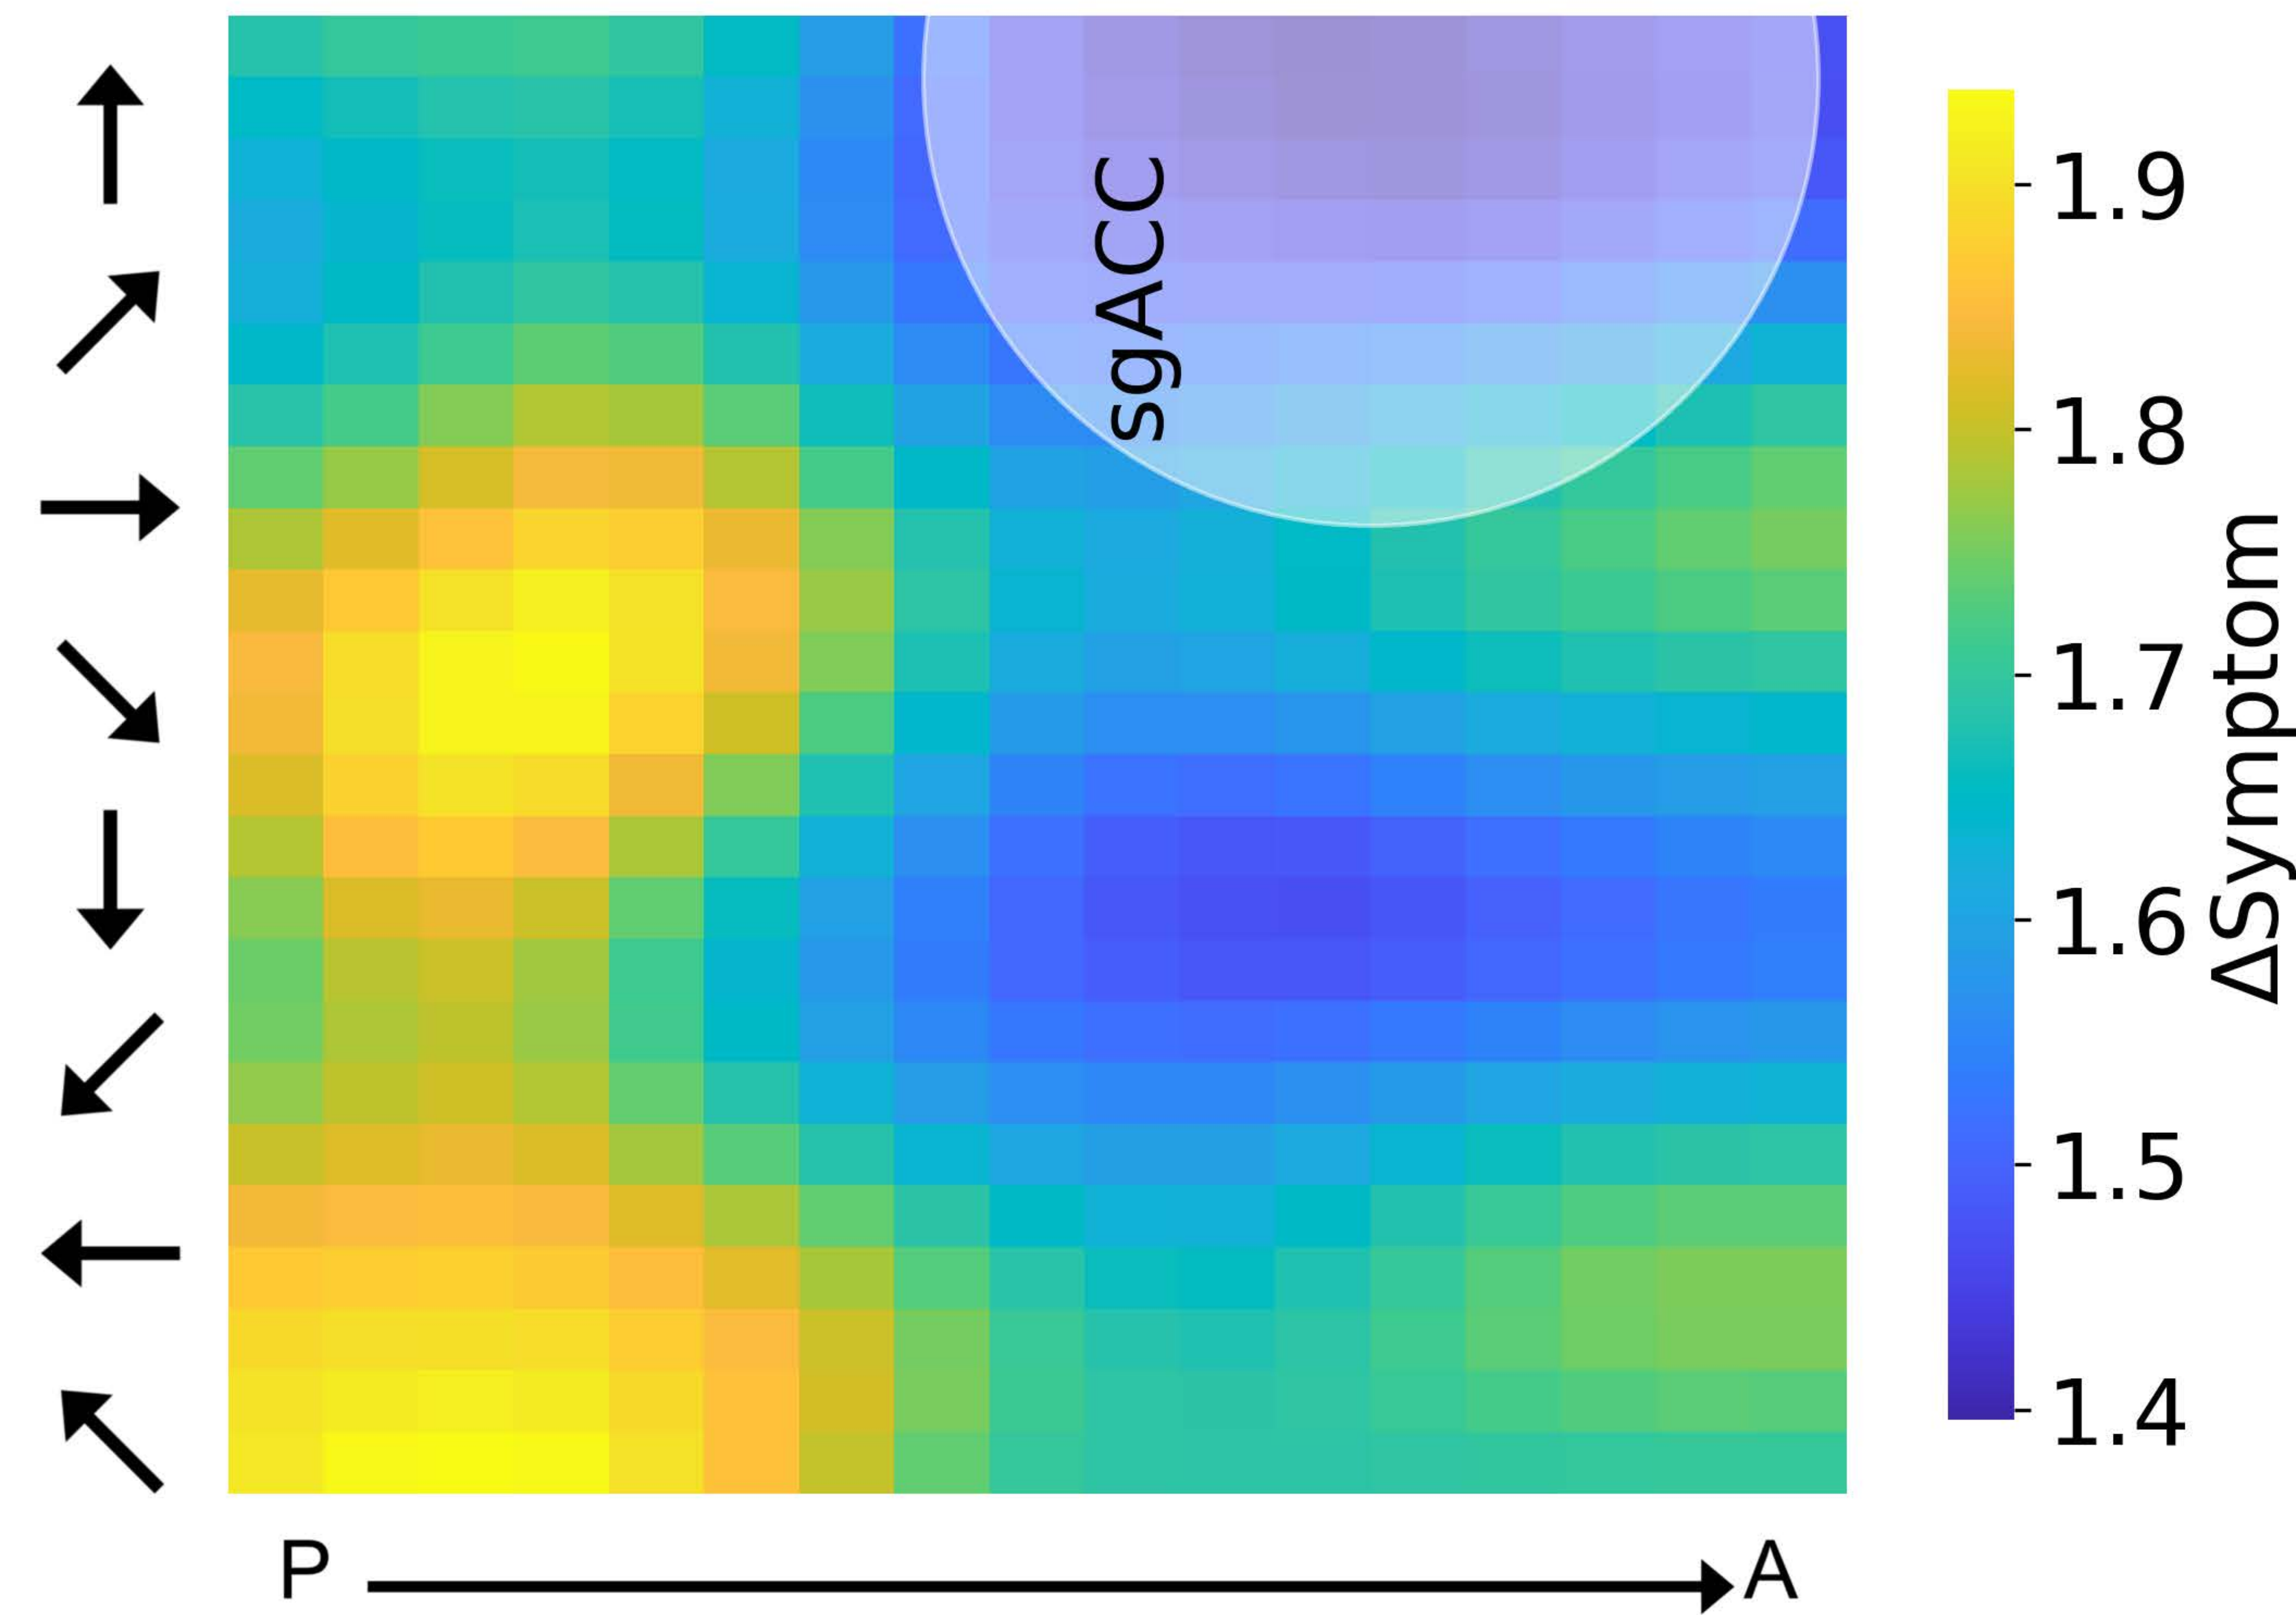



# NDARNA955LXG\_hamd\_left\_dlpfc

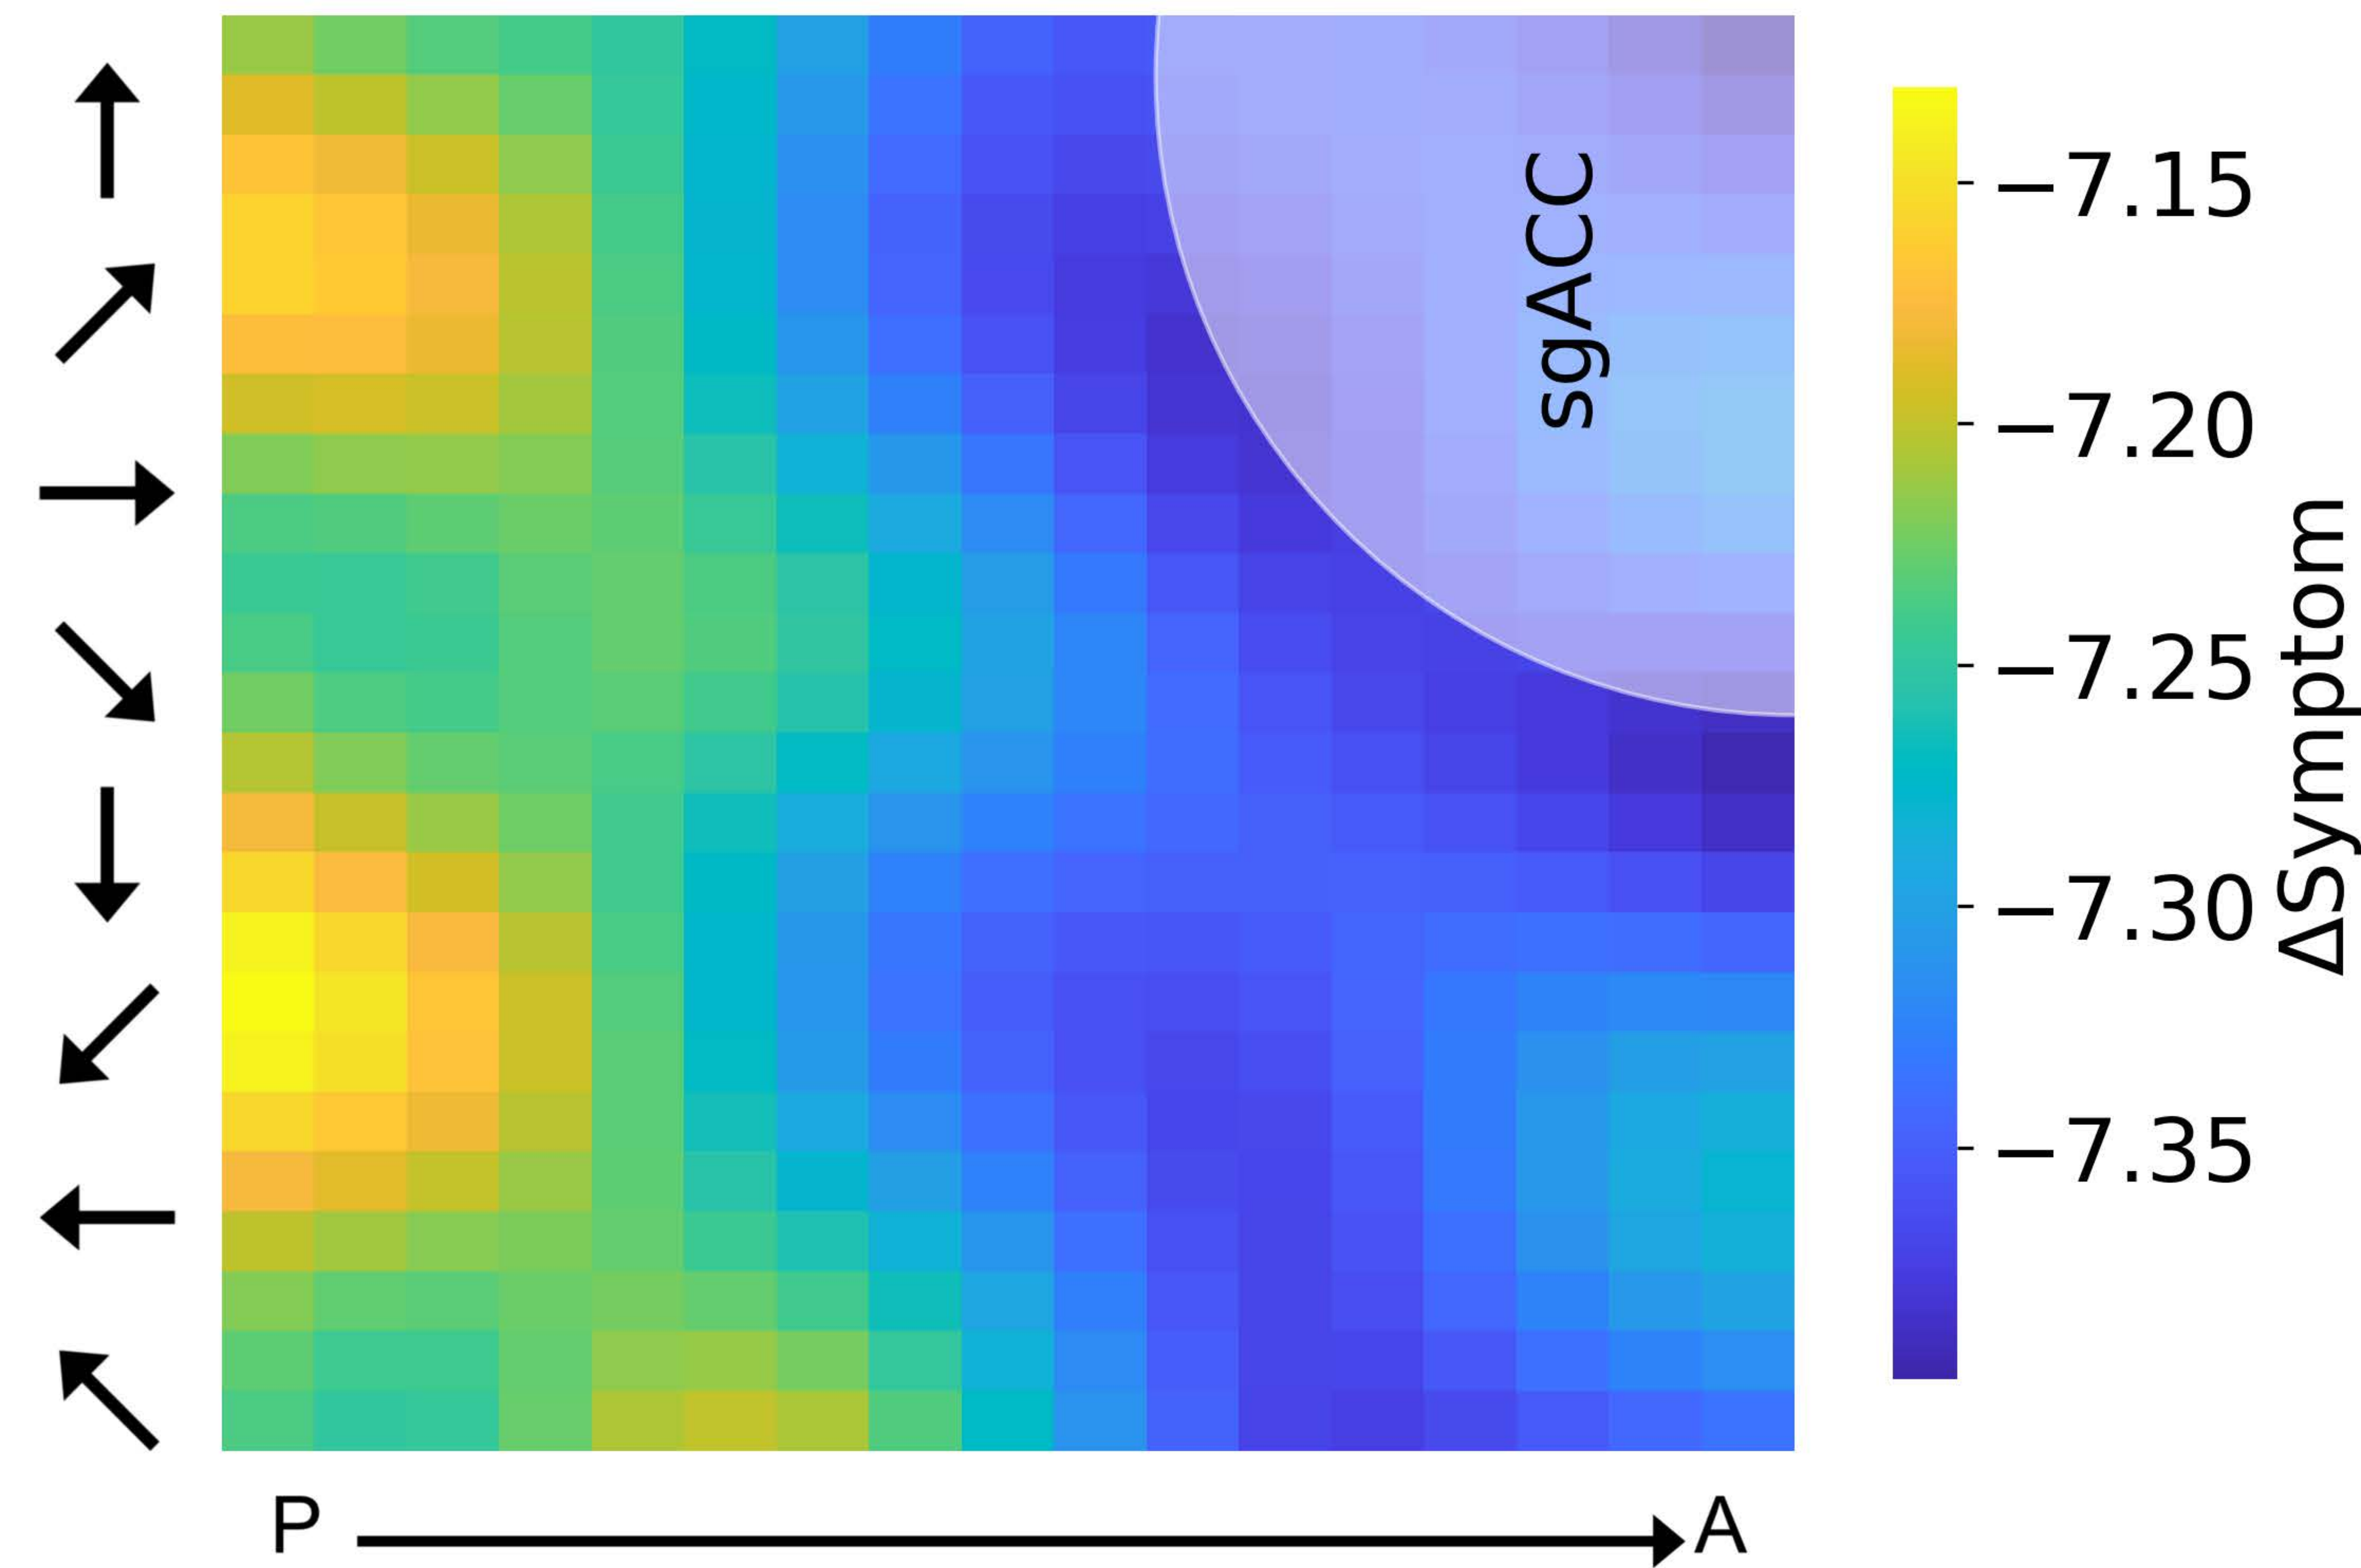



# NDARNR764NAK\_hamd\_left\_dlpfc

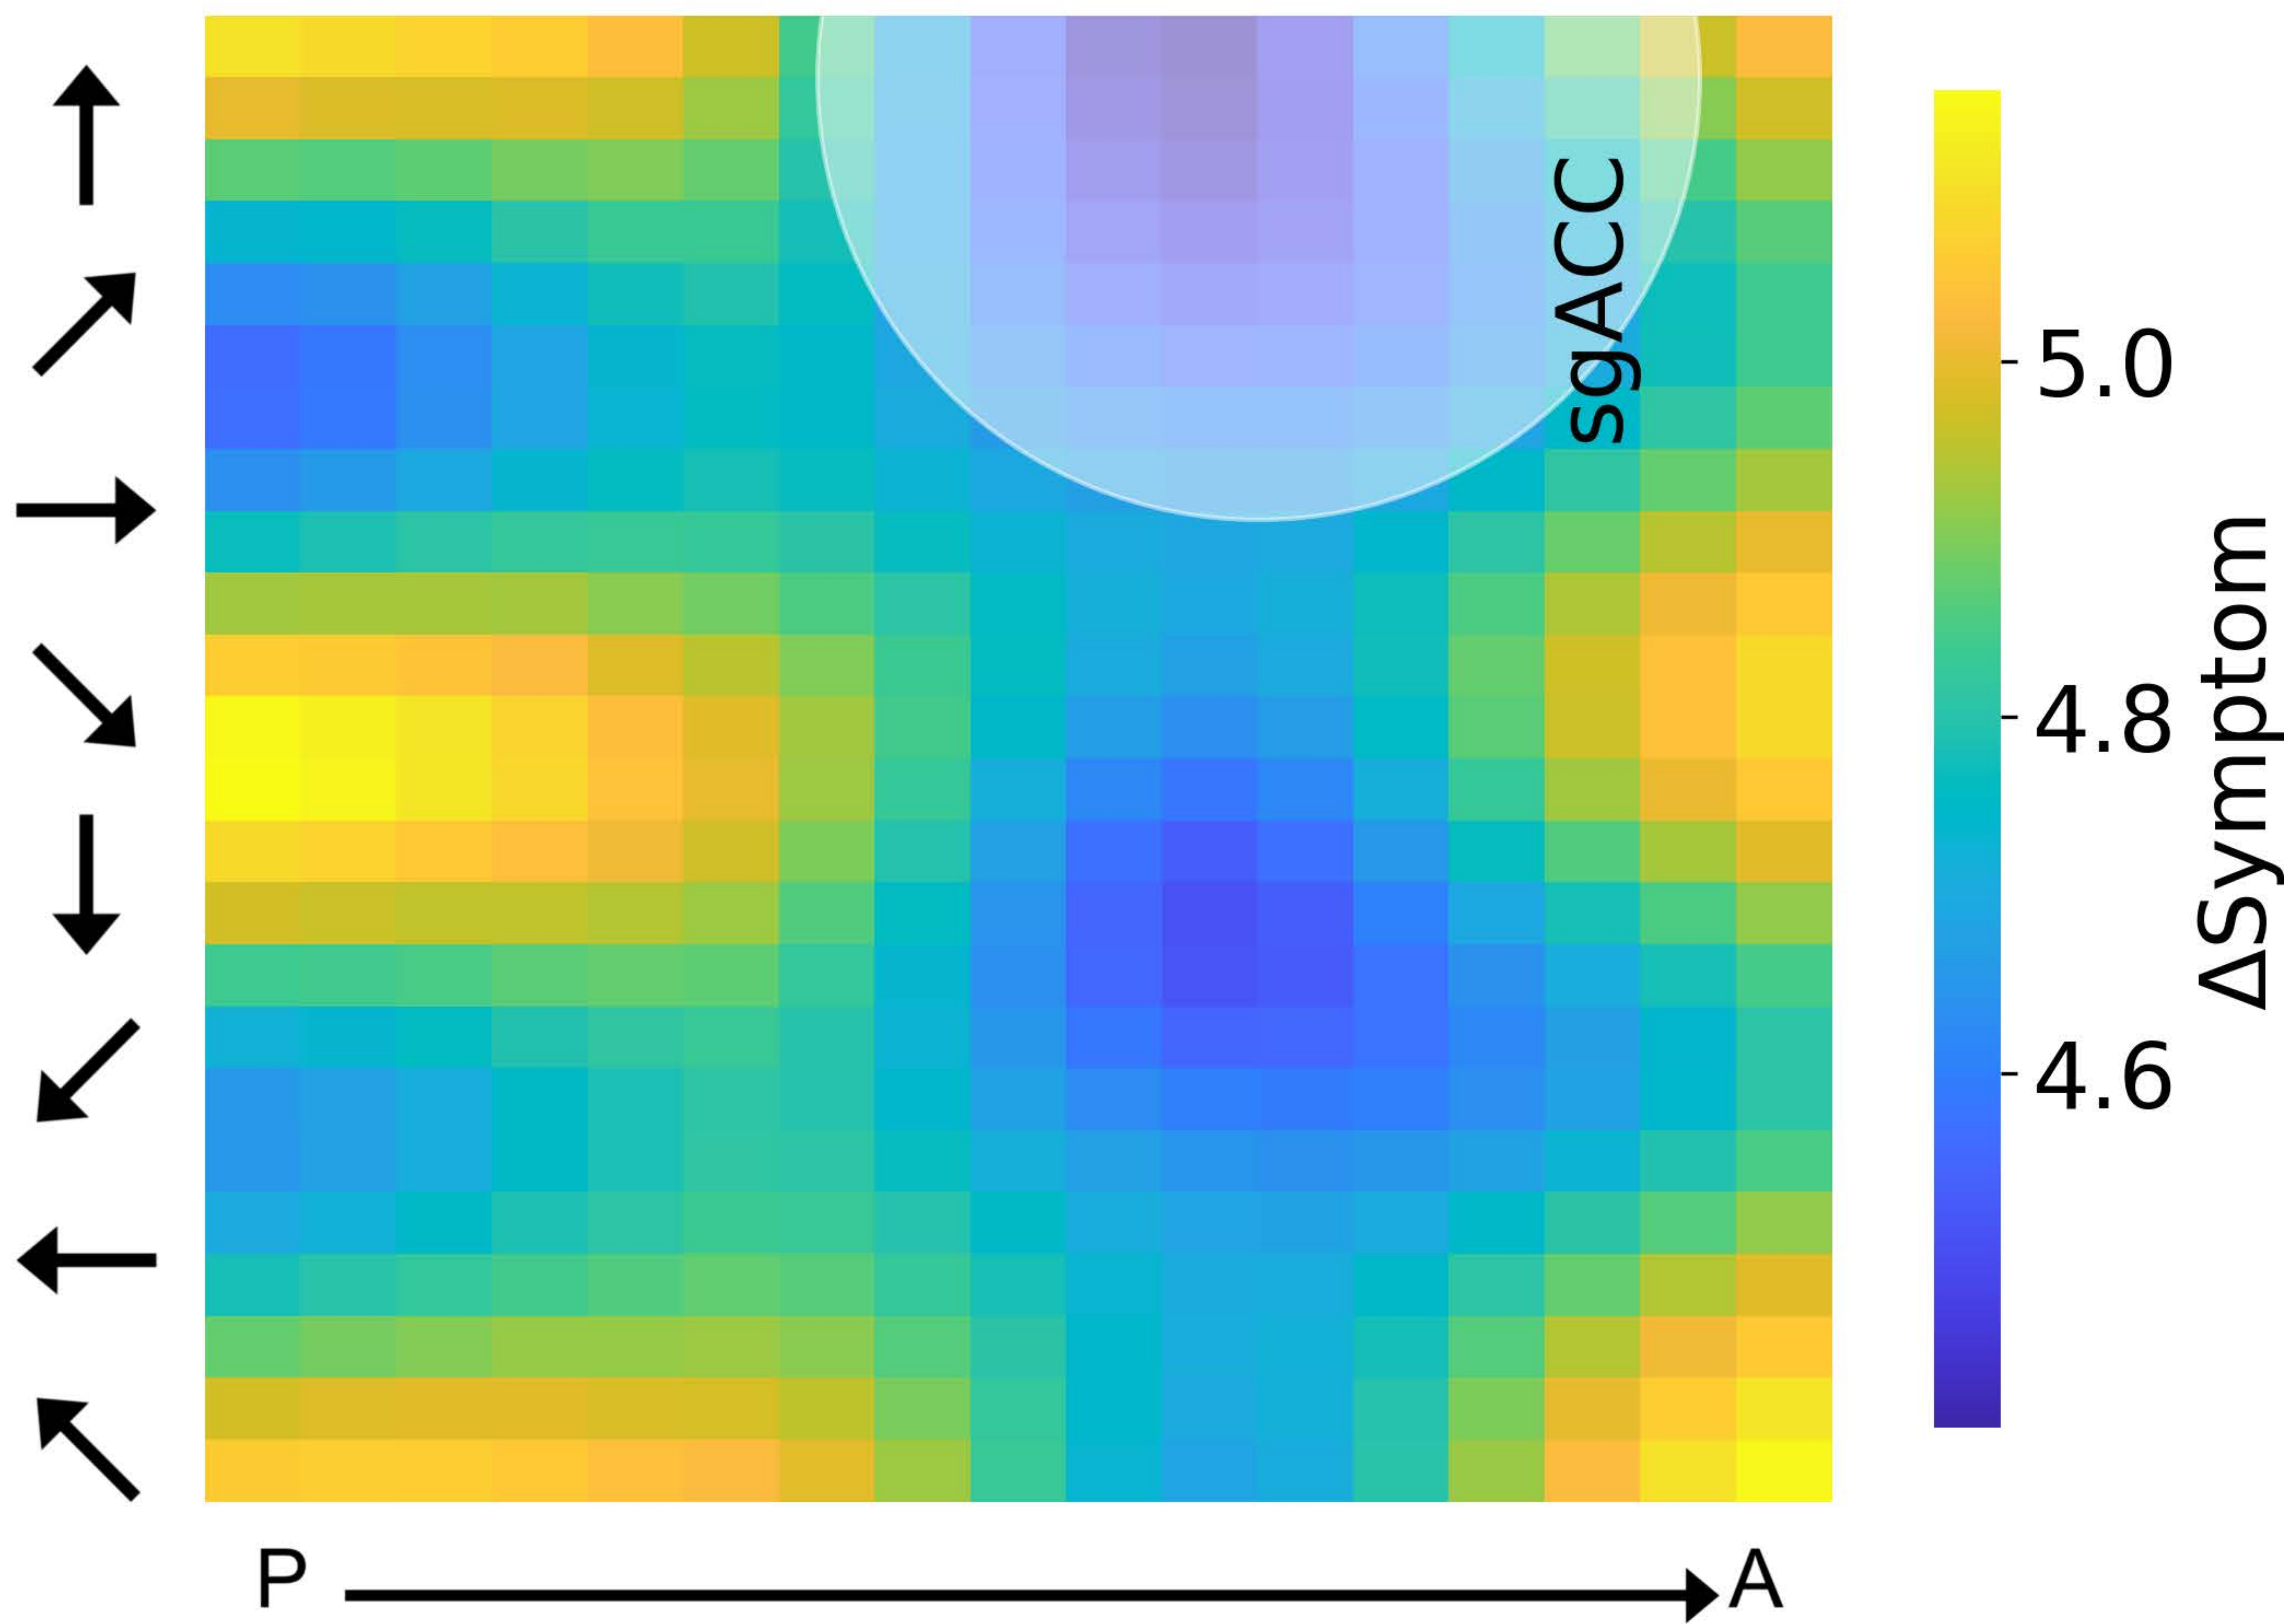



# NDARNU180HL3\_hamd\_left\_dlpfc

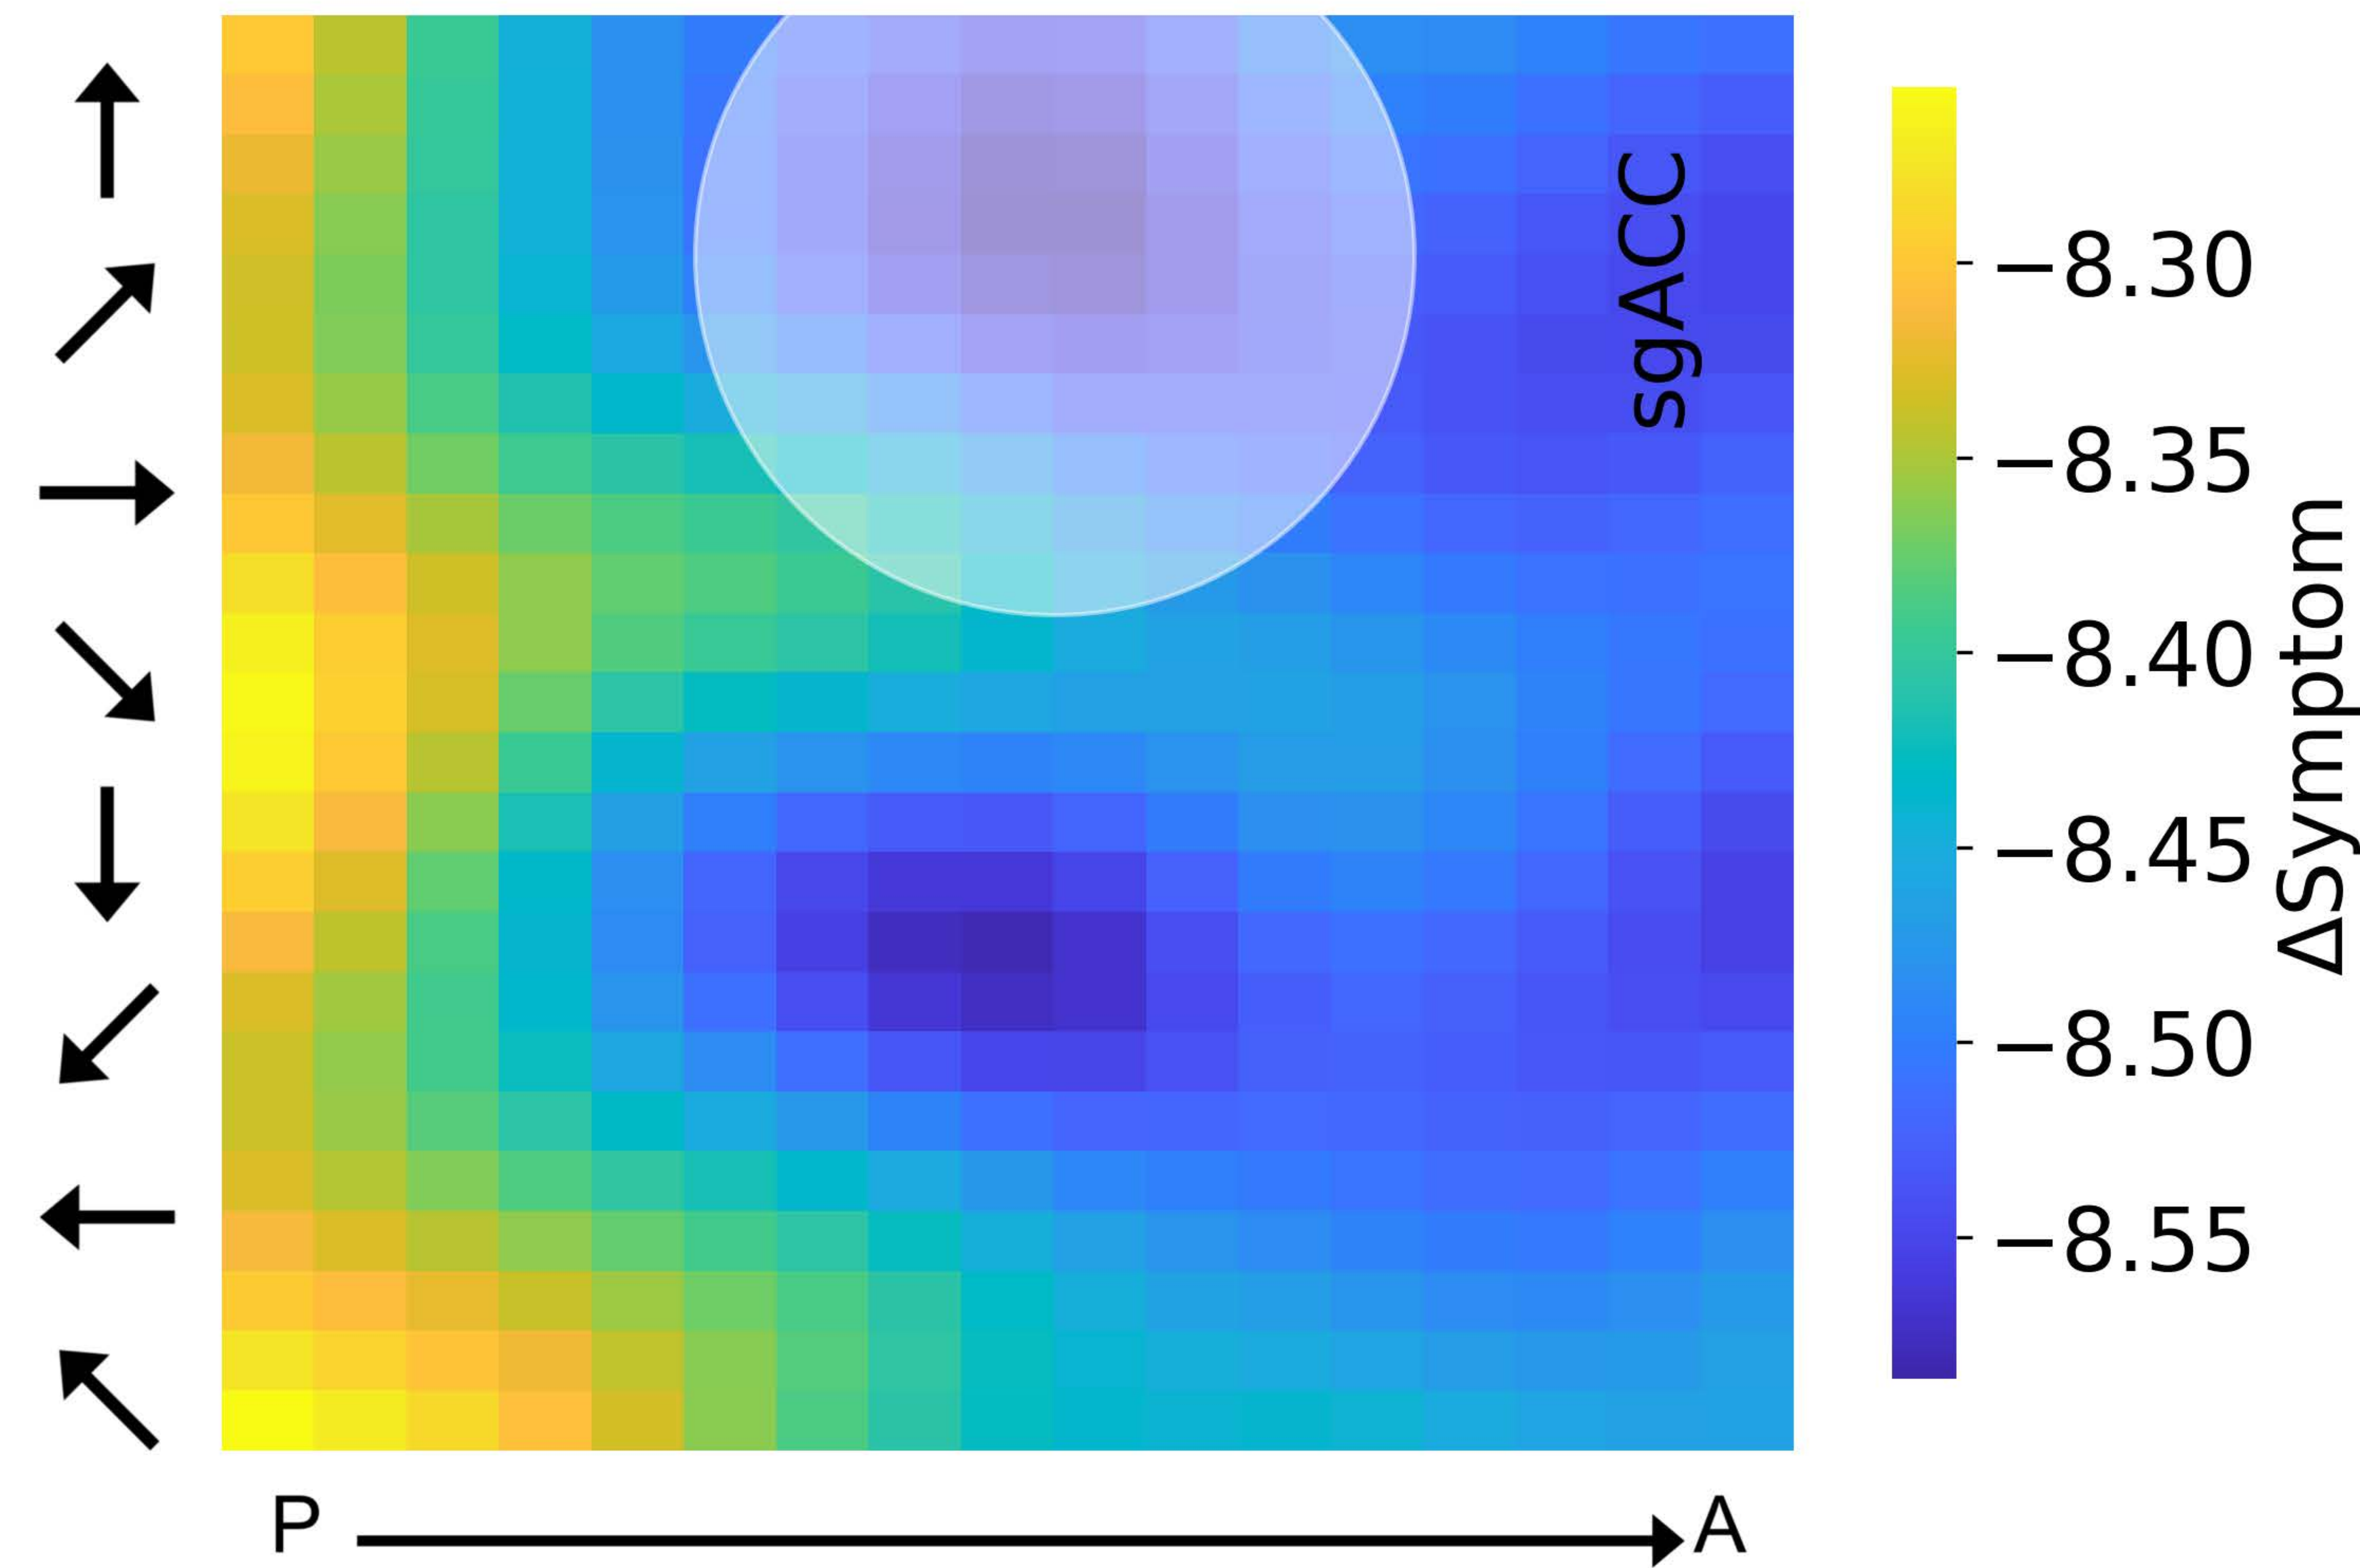



# INDARNZ824XHB\_hamd\_left\_dlpfc

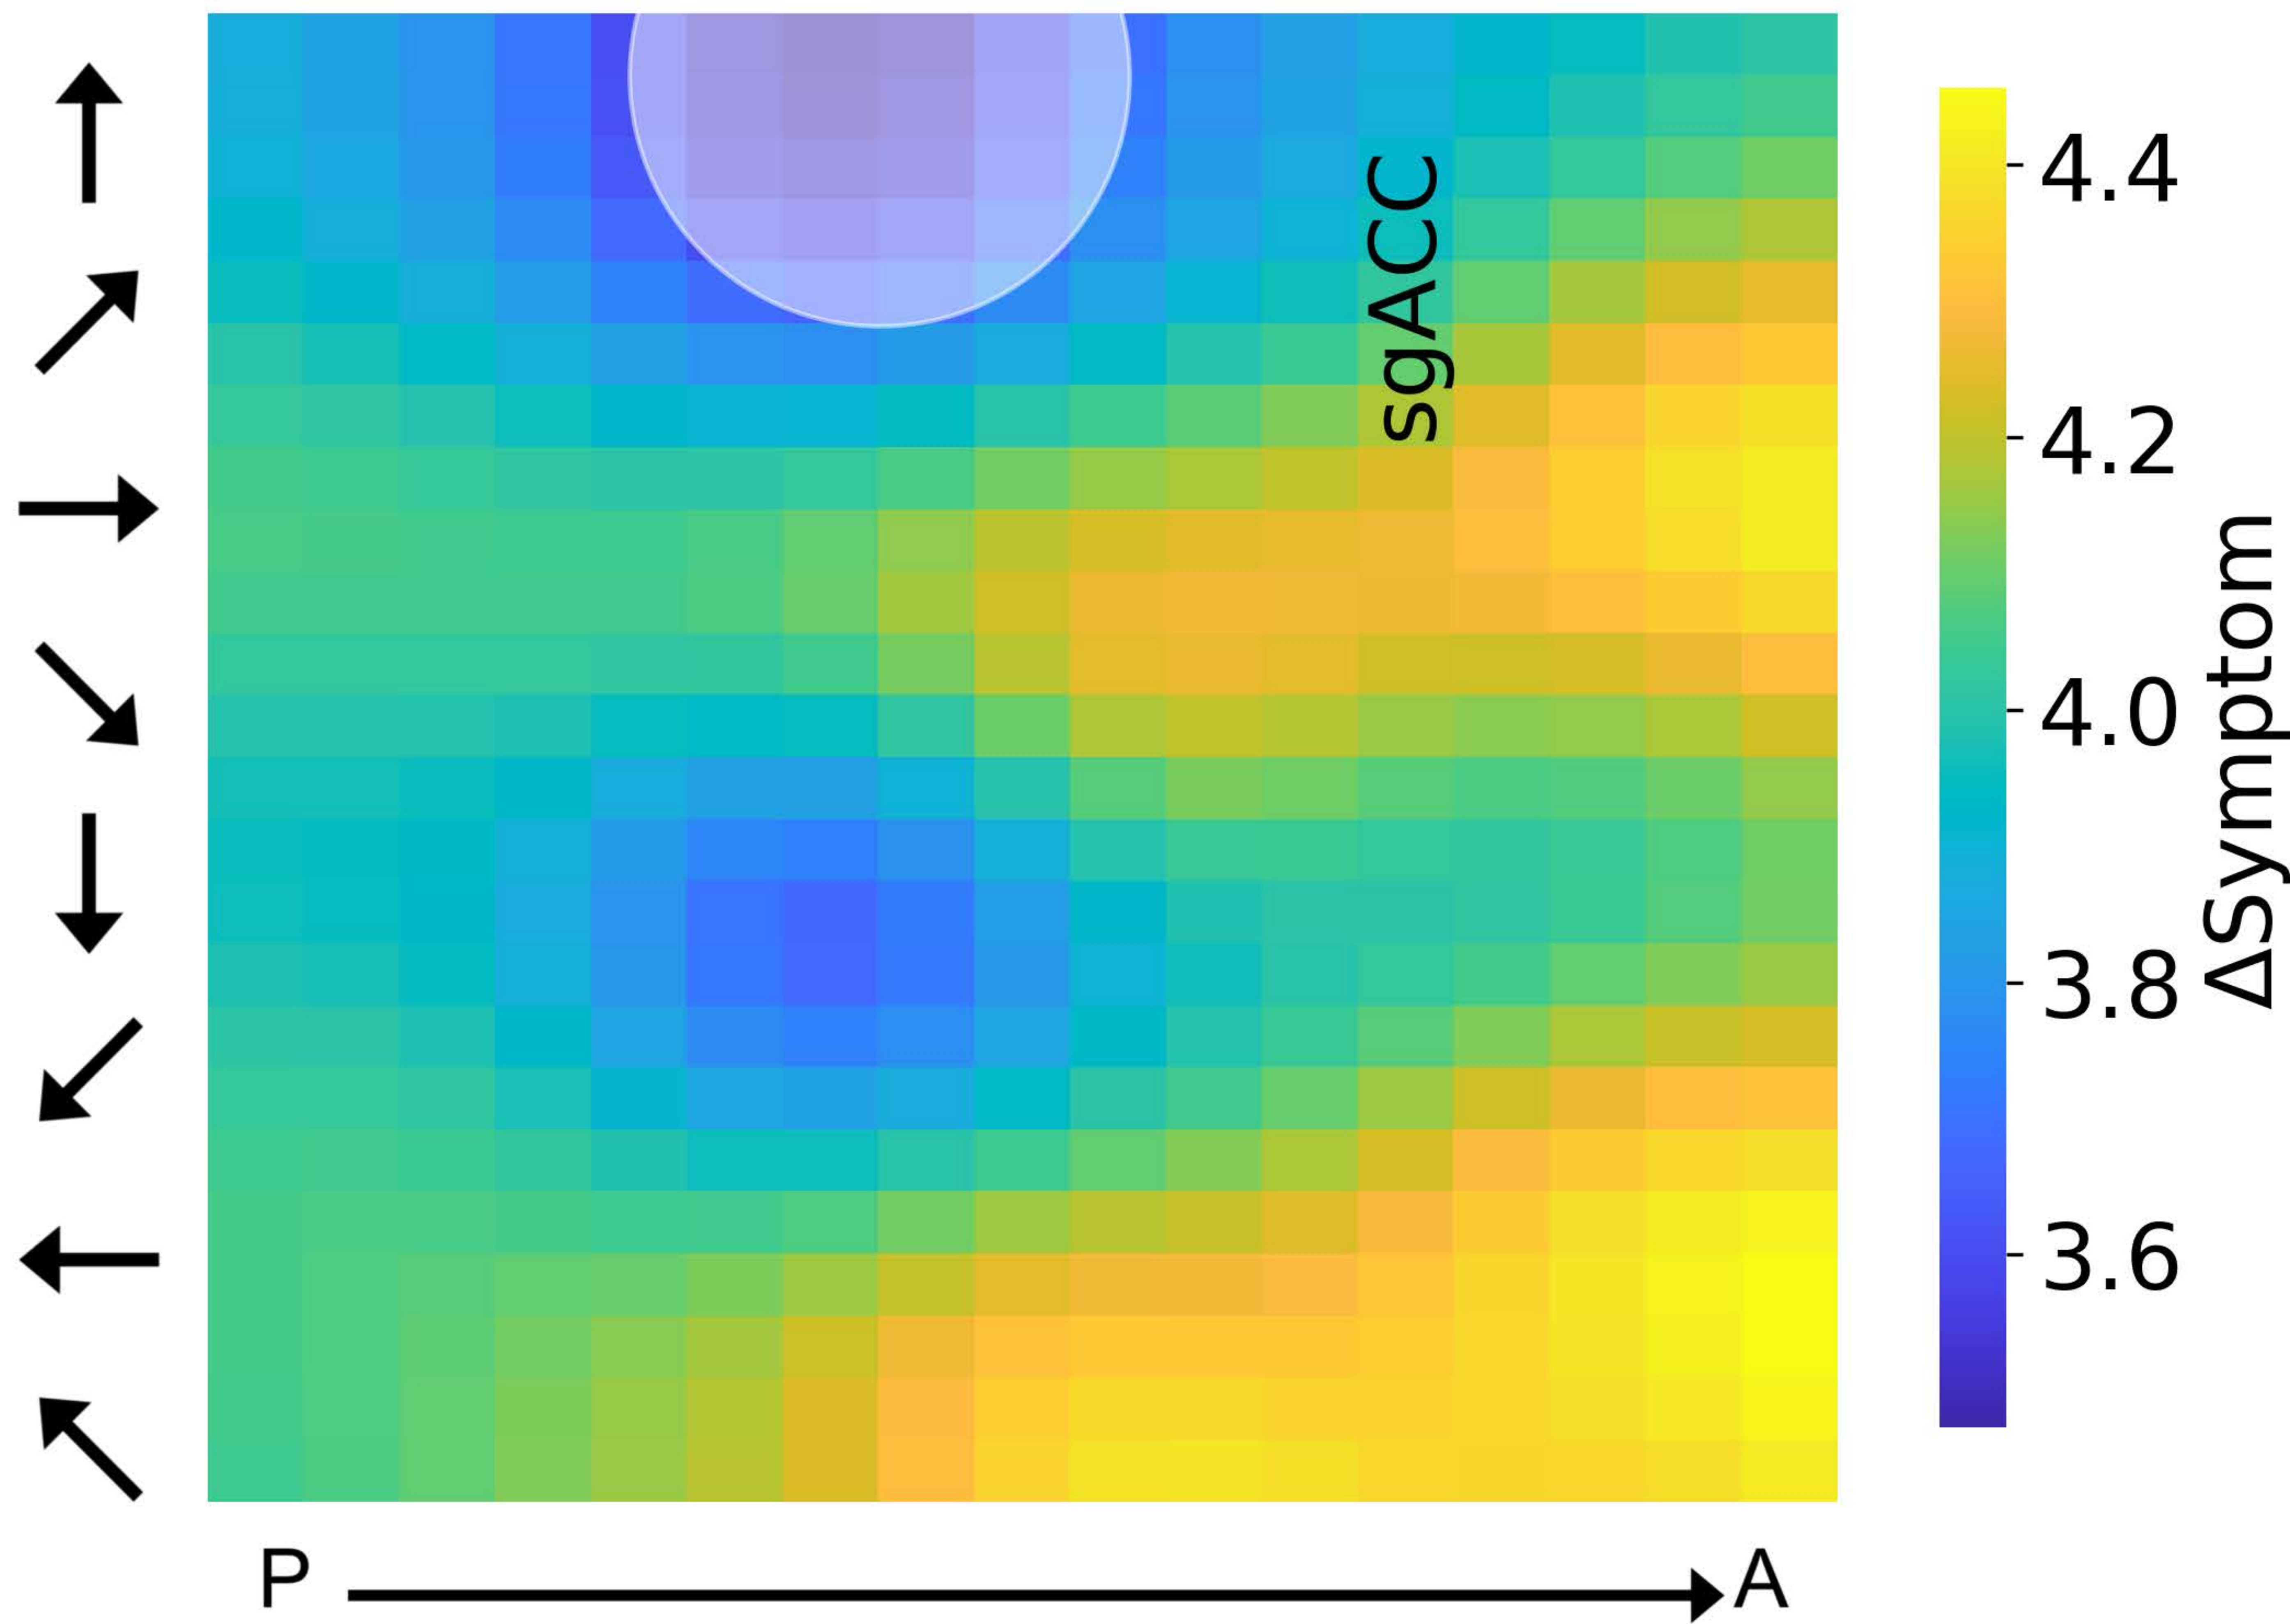



# NDARPA762UGZ\_hamd\_left\_dlpfc

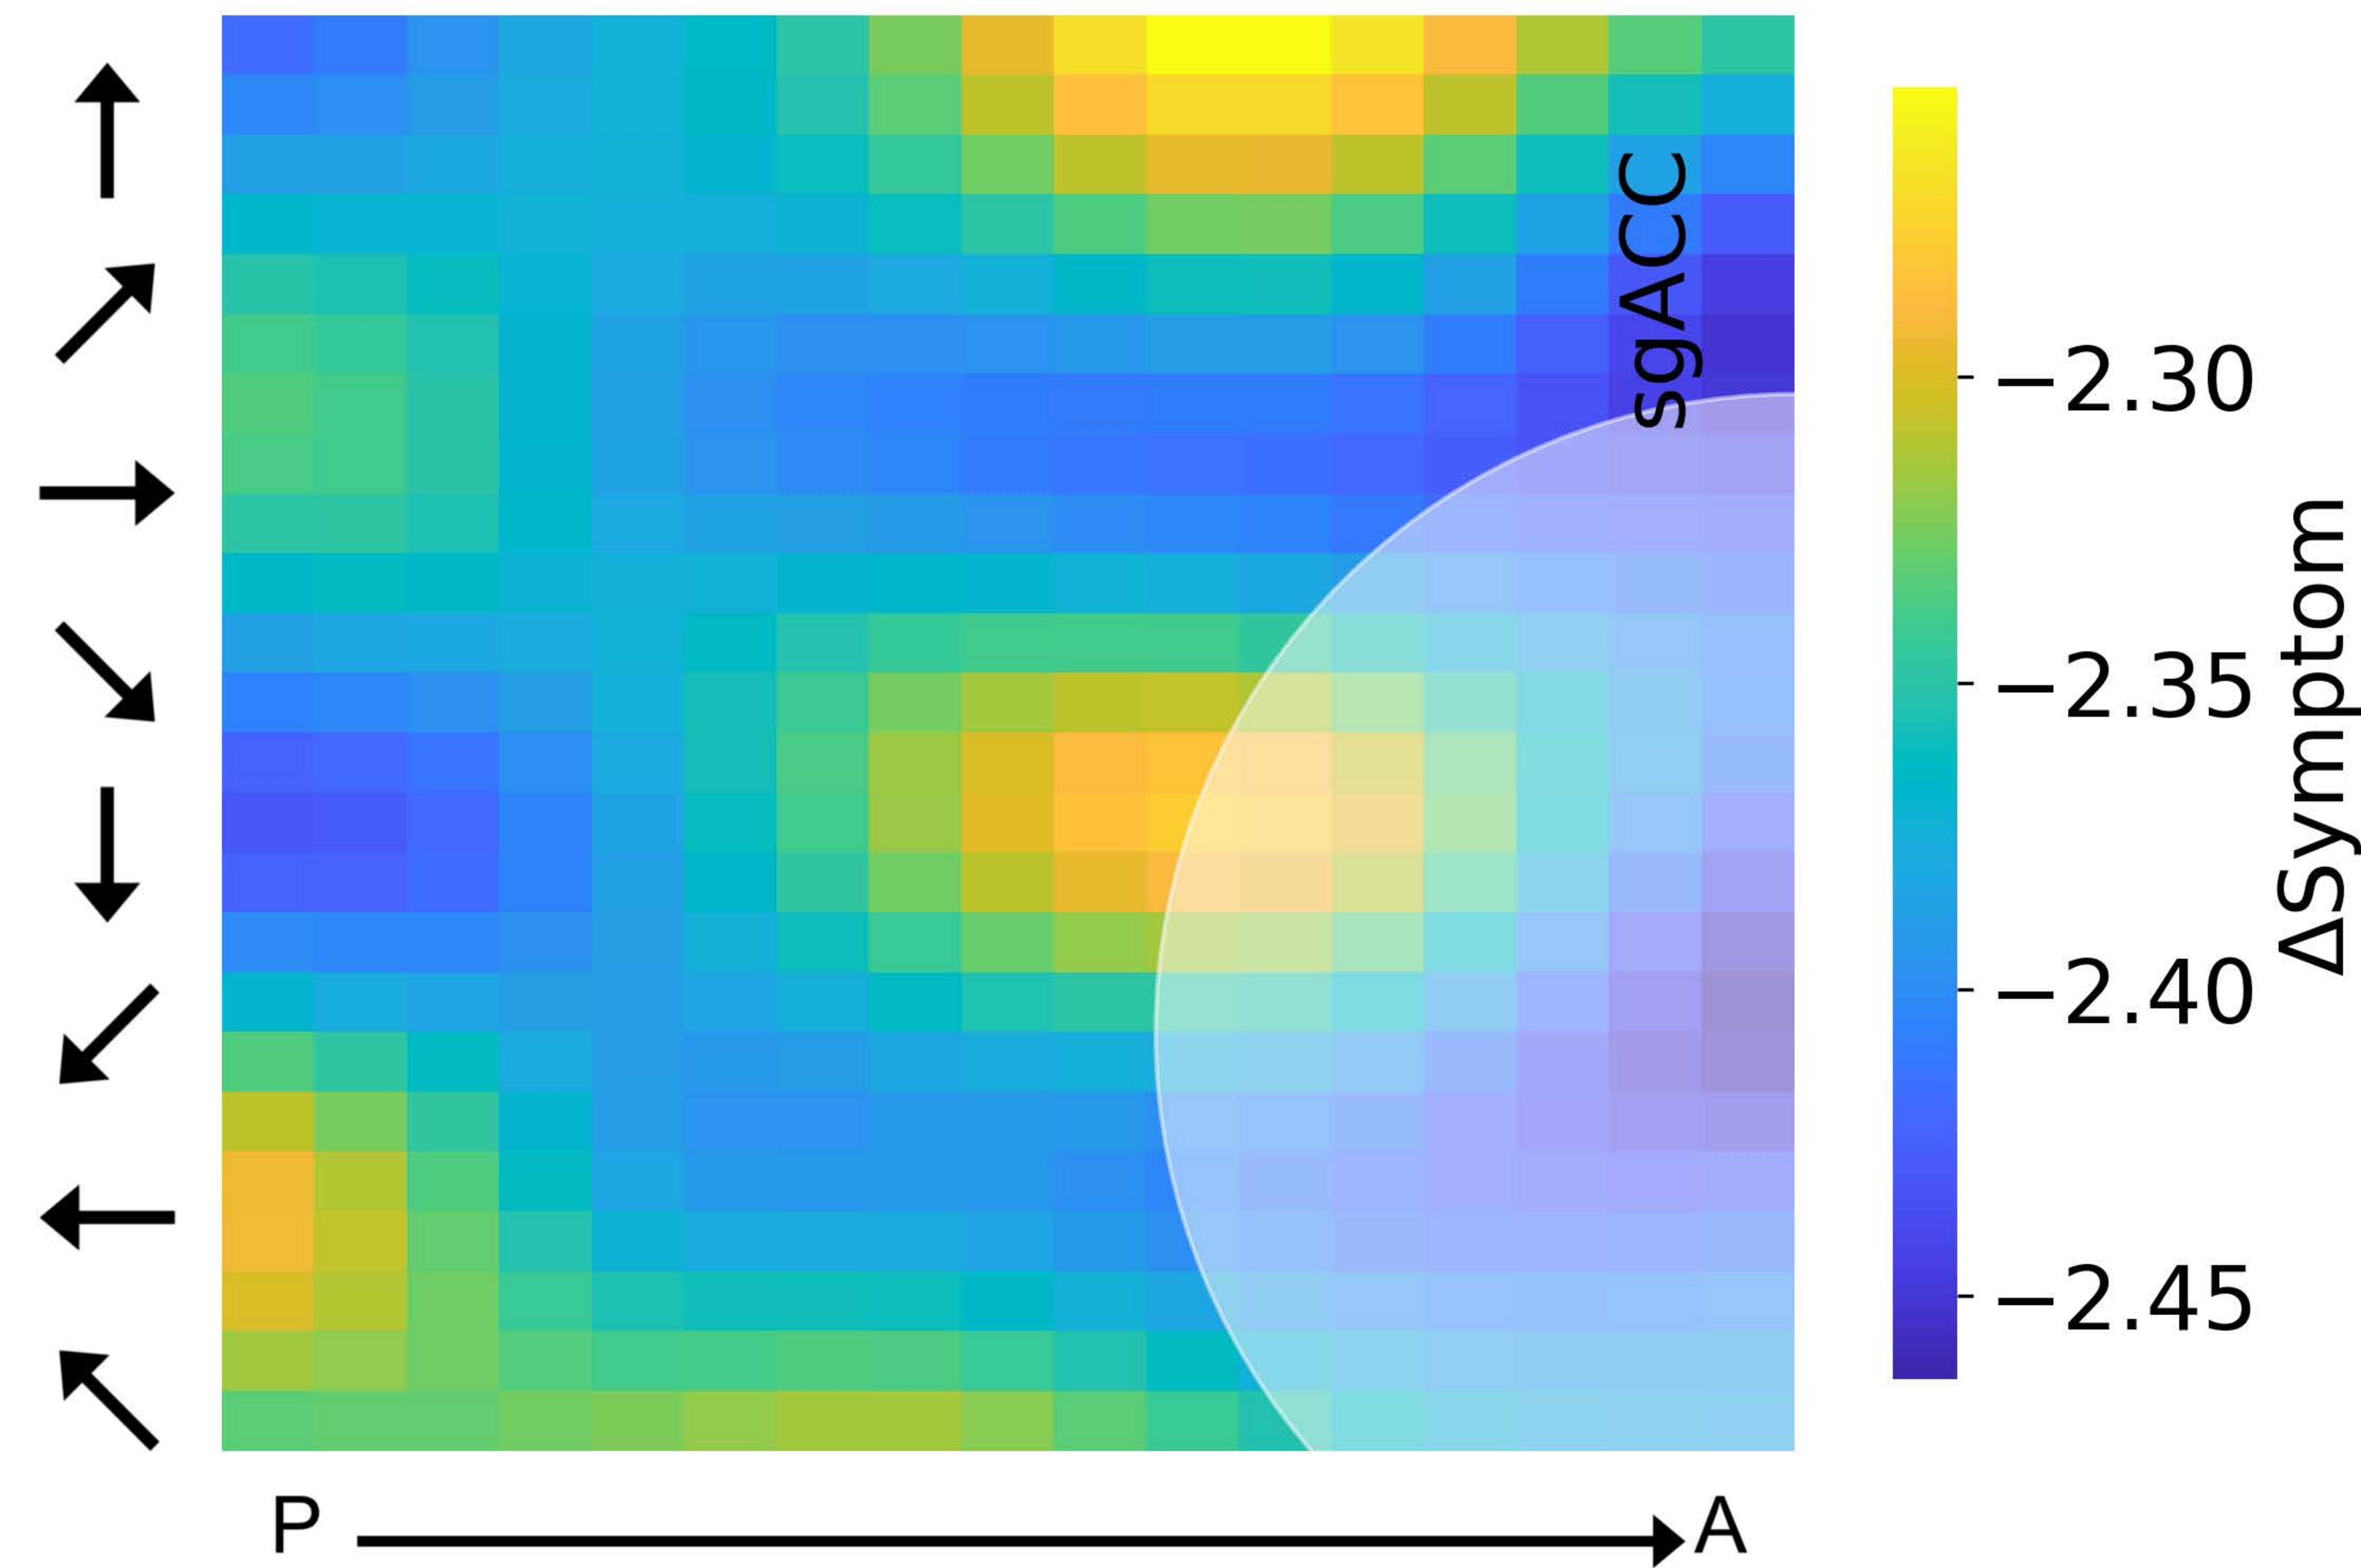



# NDARPC197VR3\_hamd\_left\_dlpfc

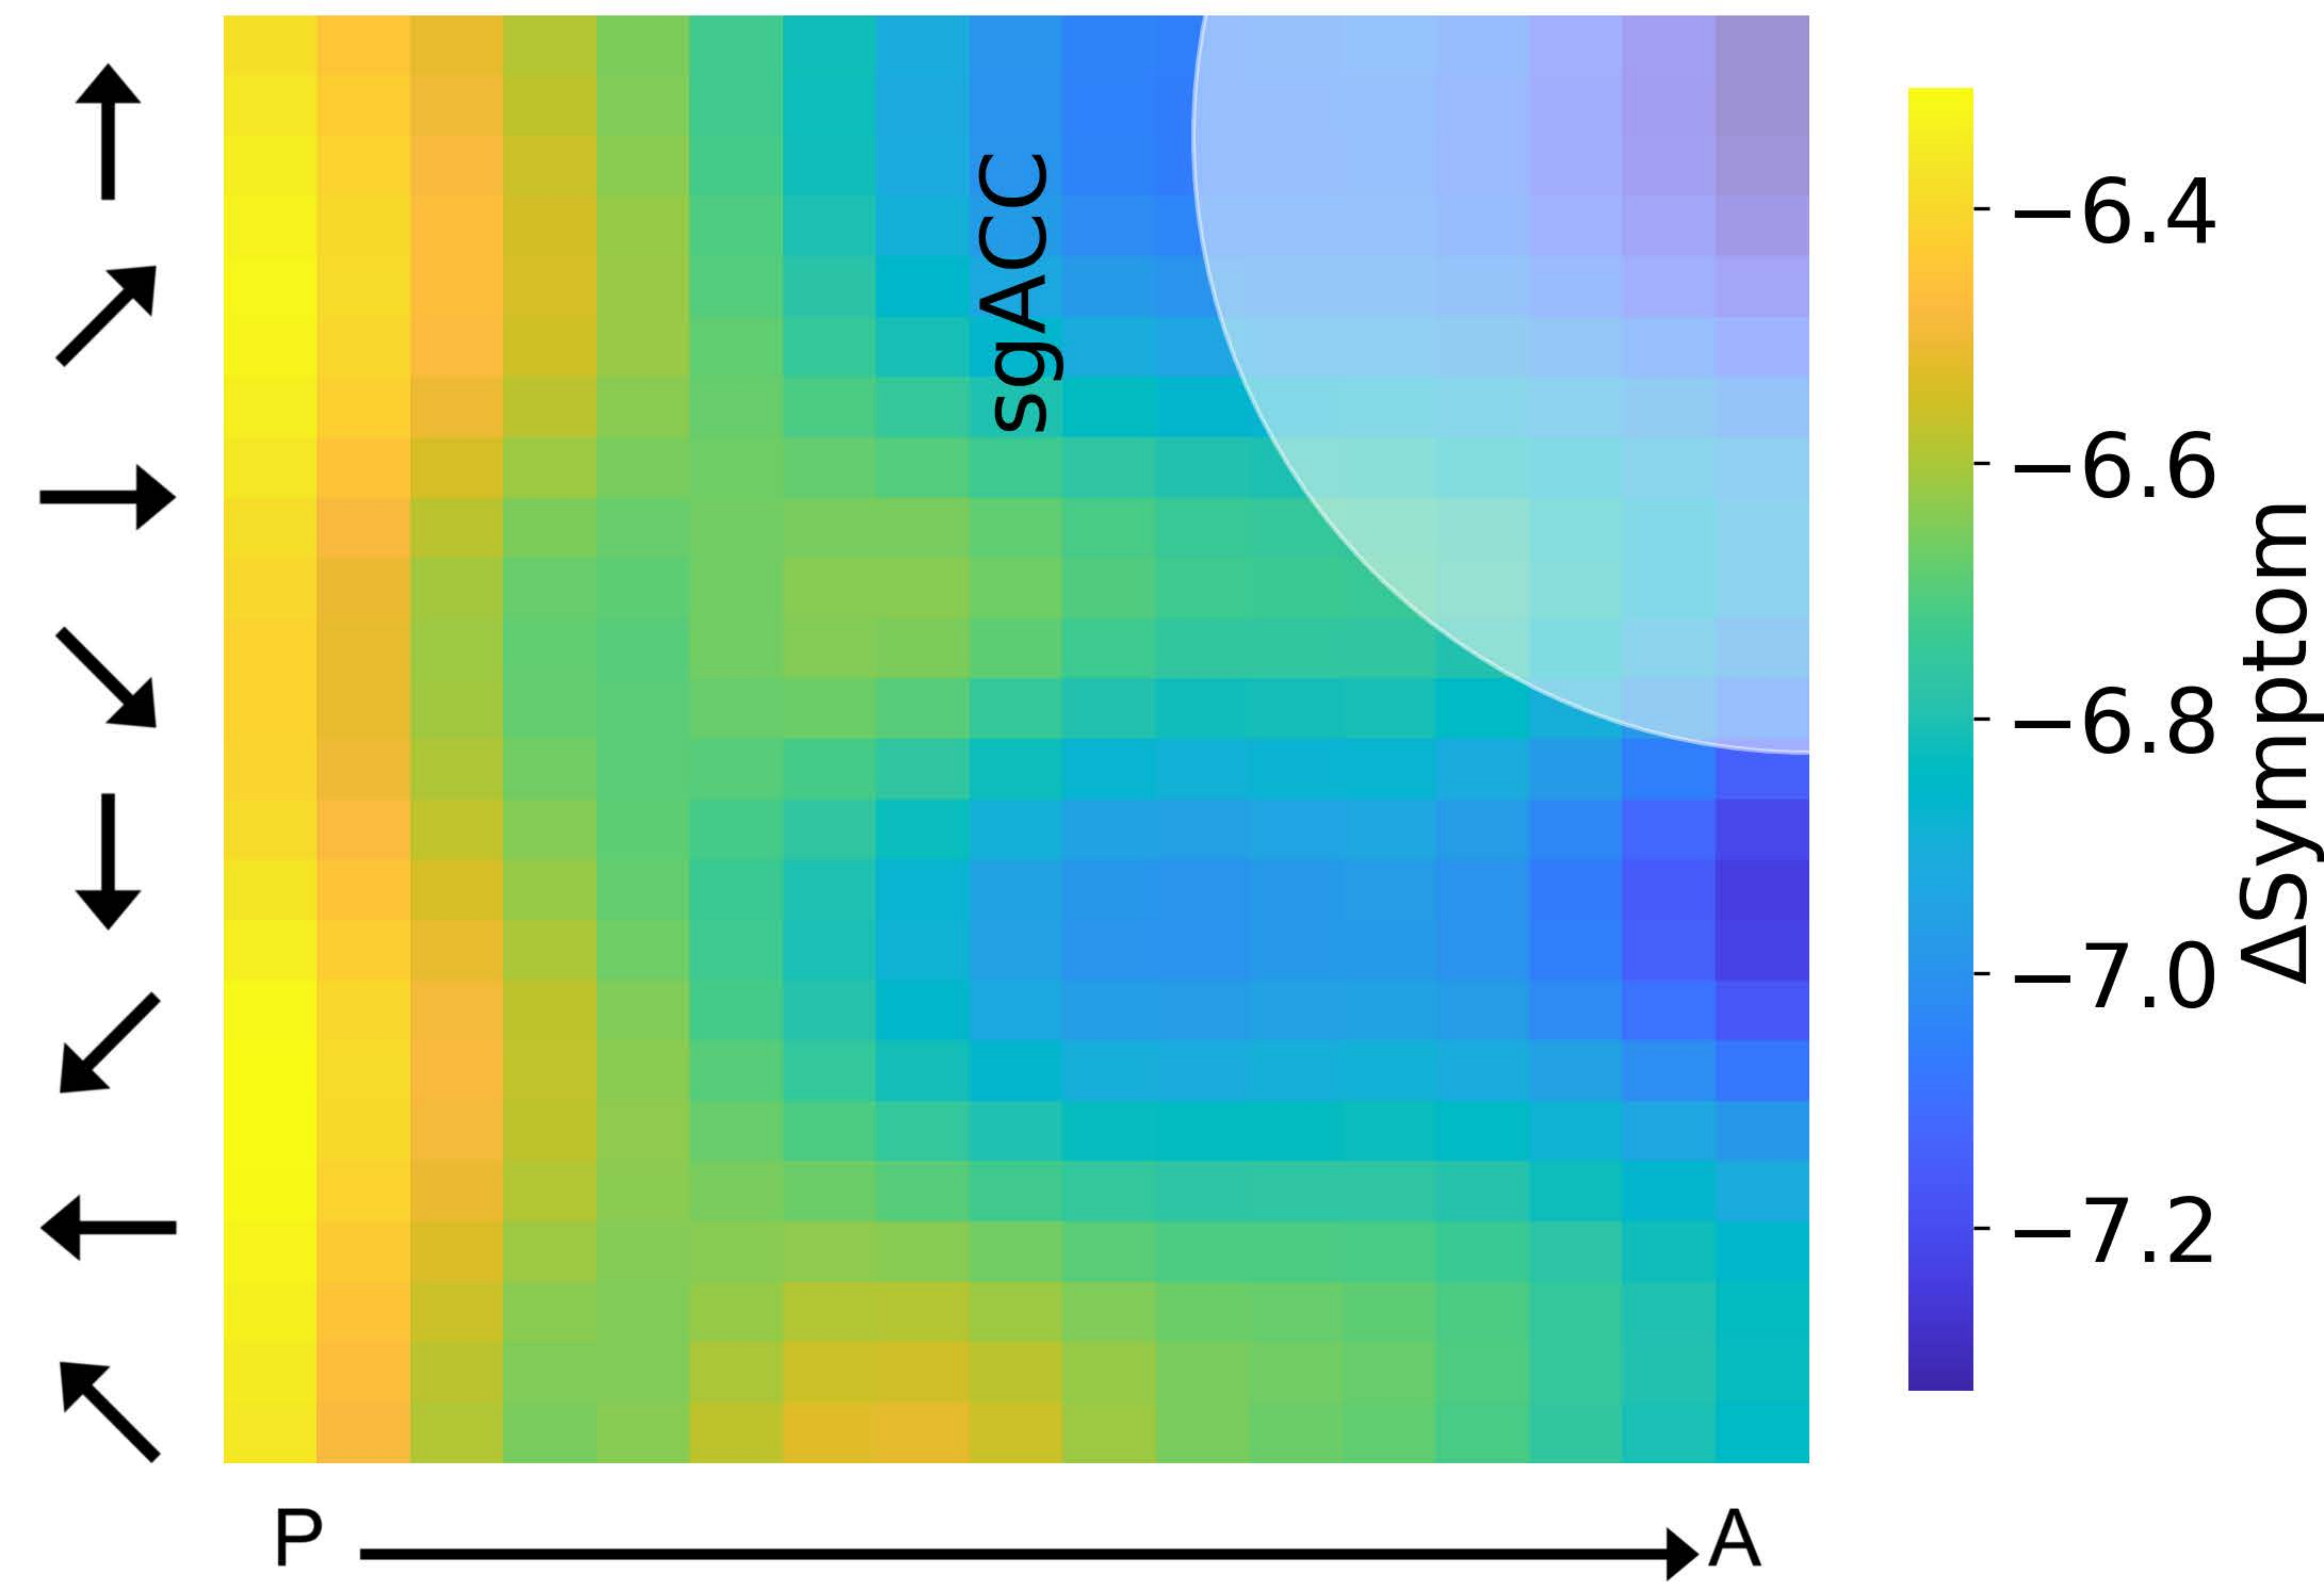



# NDARPF499HVH\_hamd\_left\_dlpfc

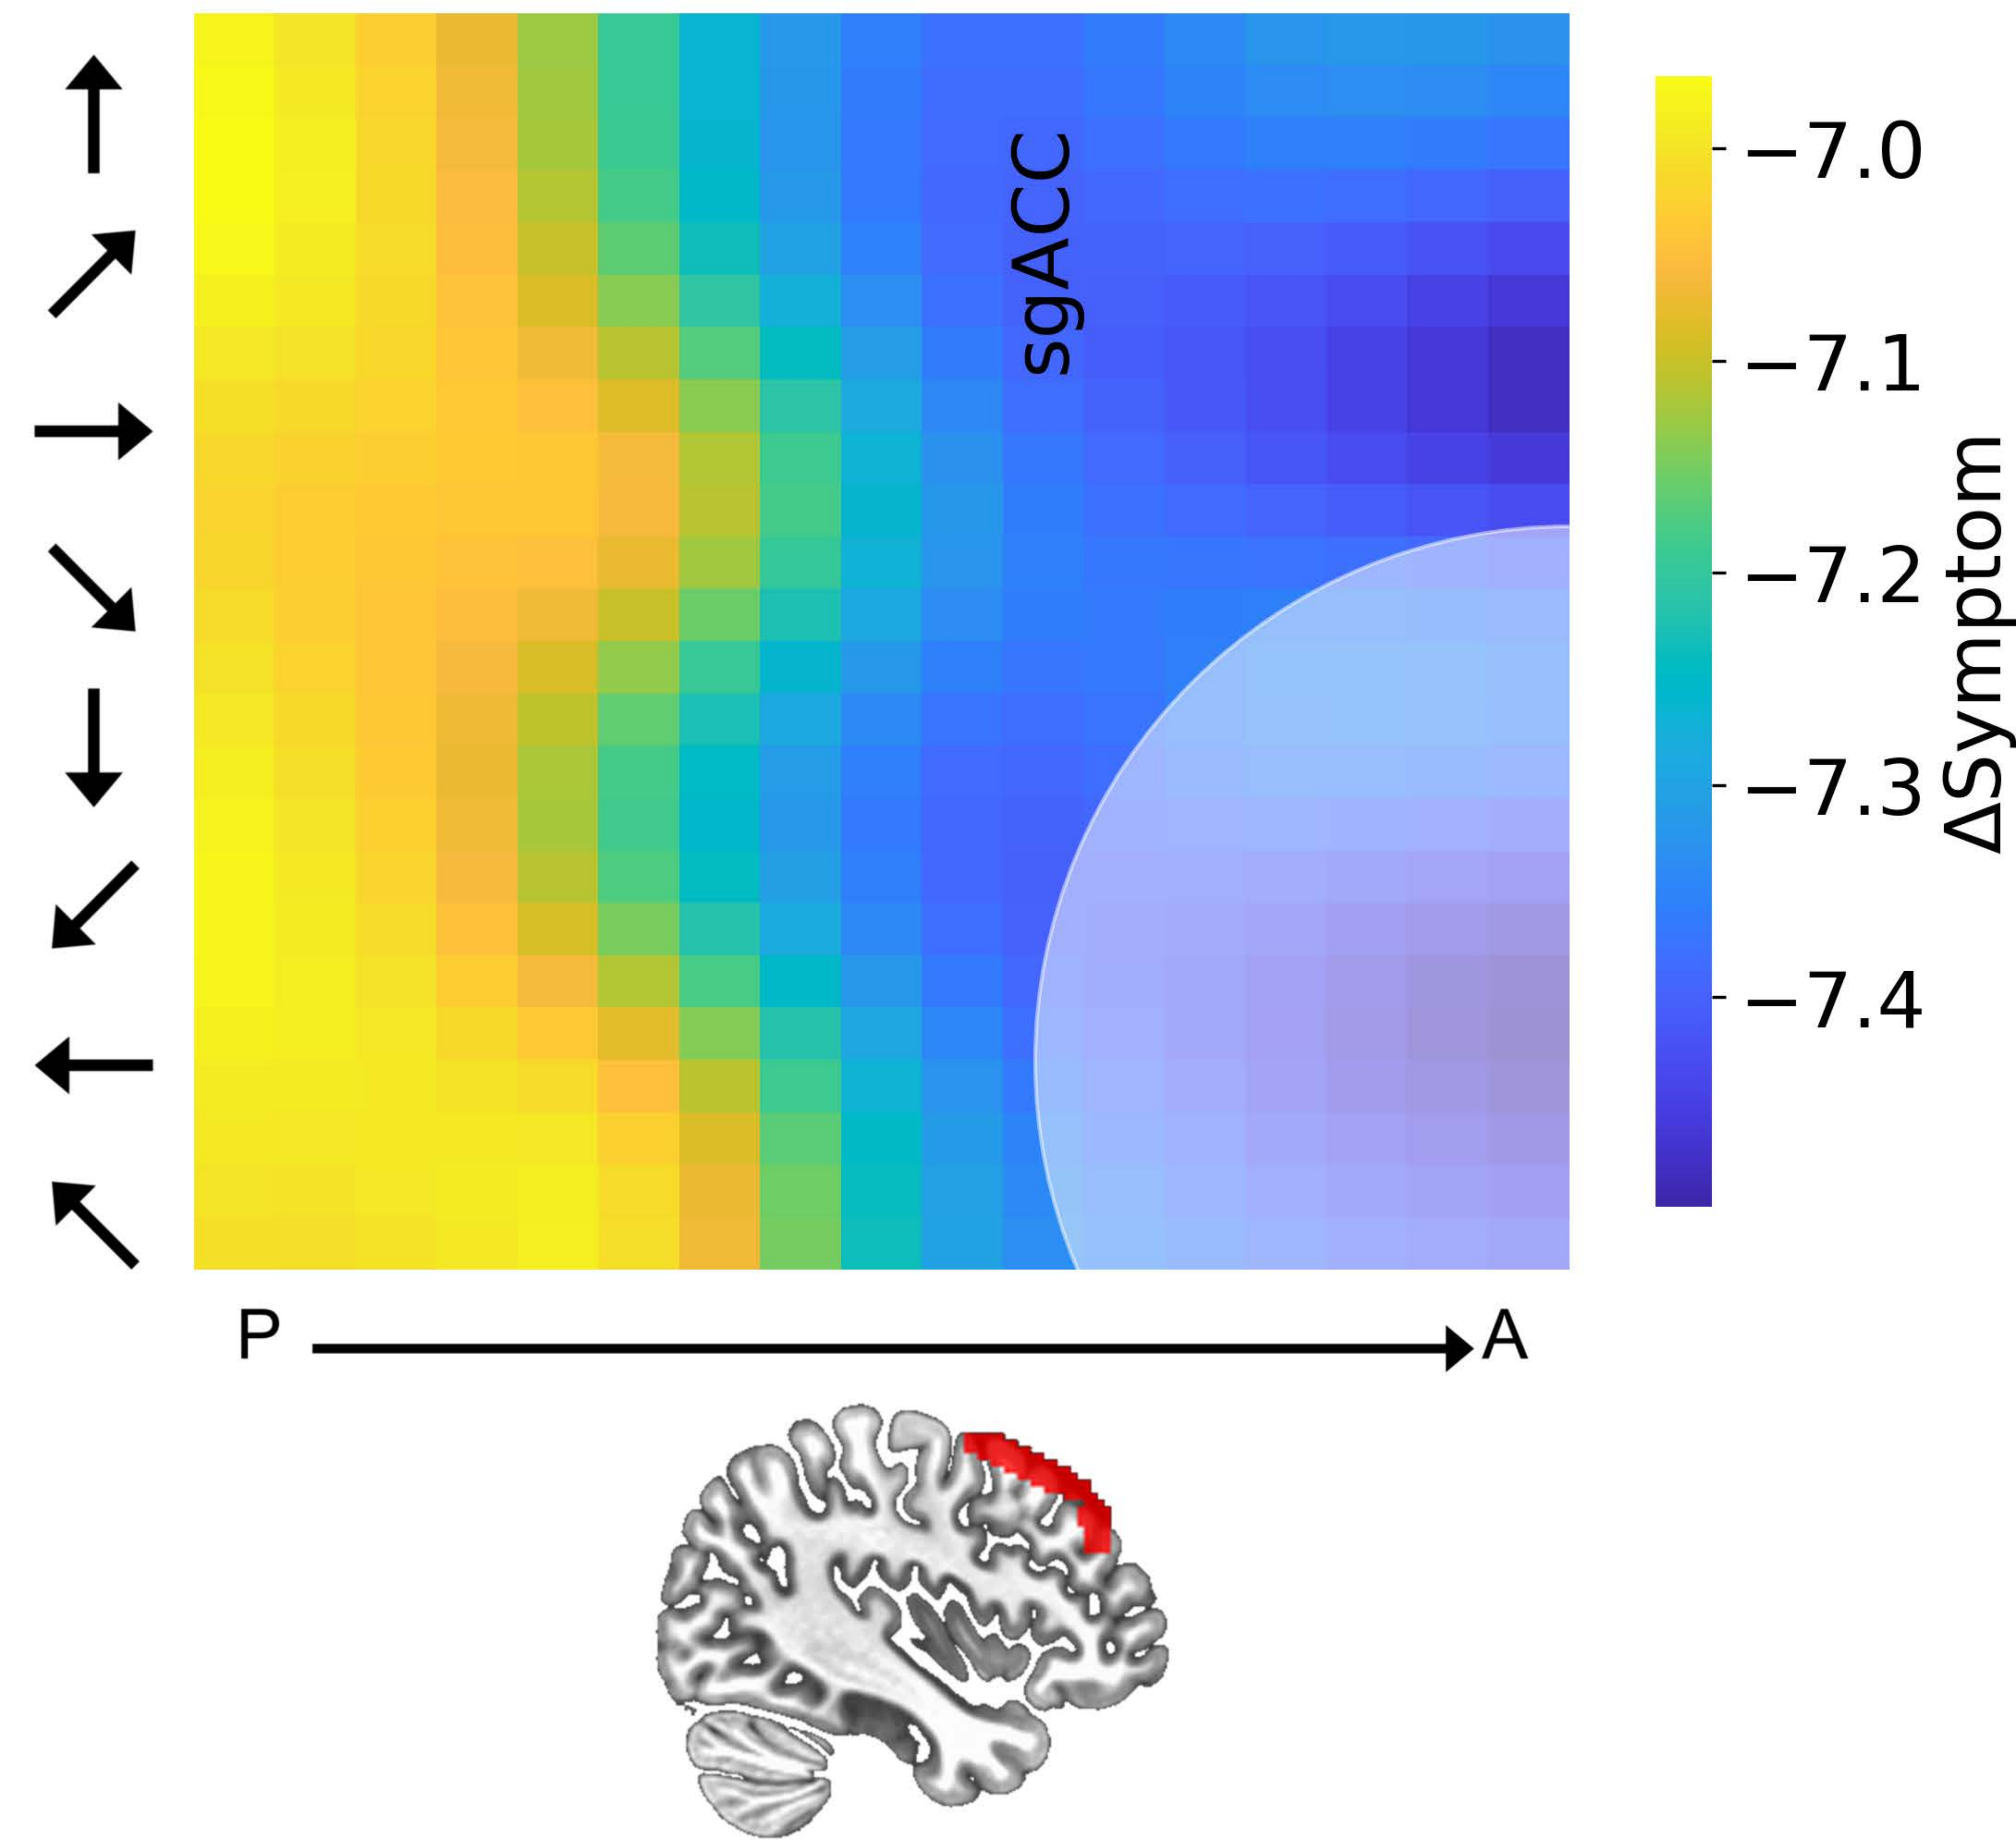



# INDARPK811MVW\_hamd\_left\_dlpfc

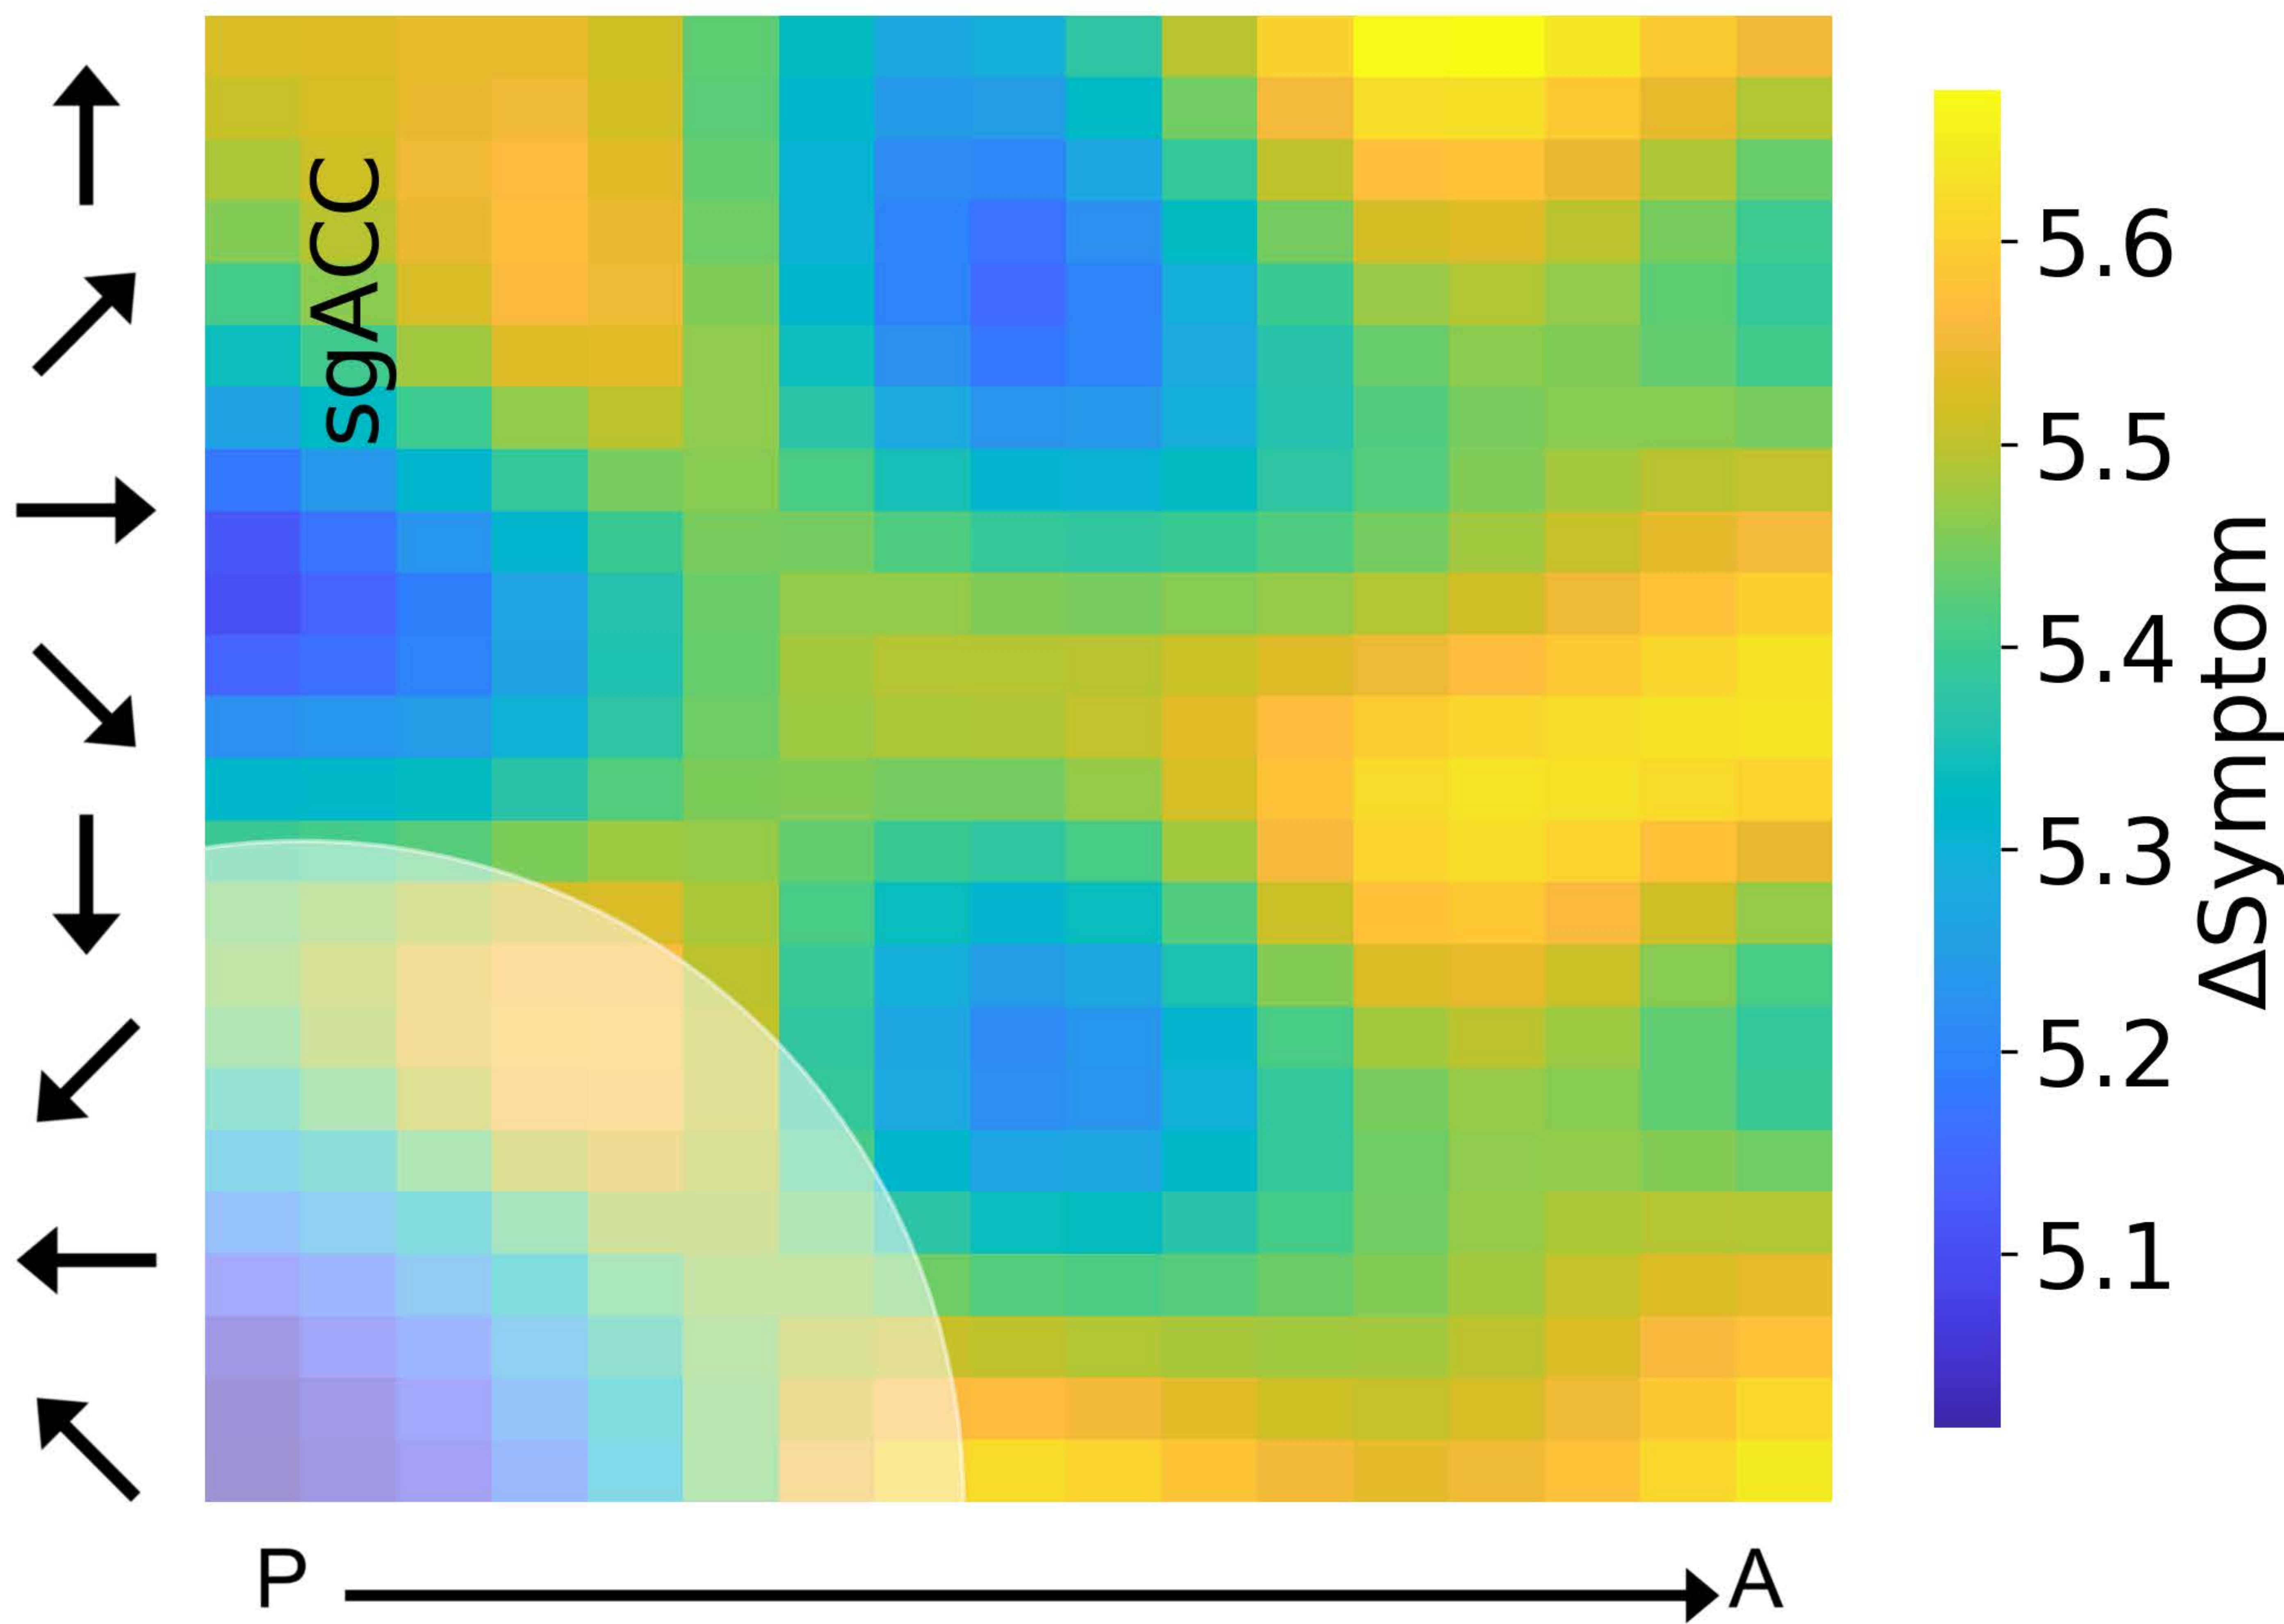



# NDARPT040EGR\_hamd\_left\_dlpfc

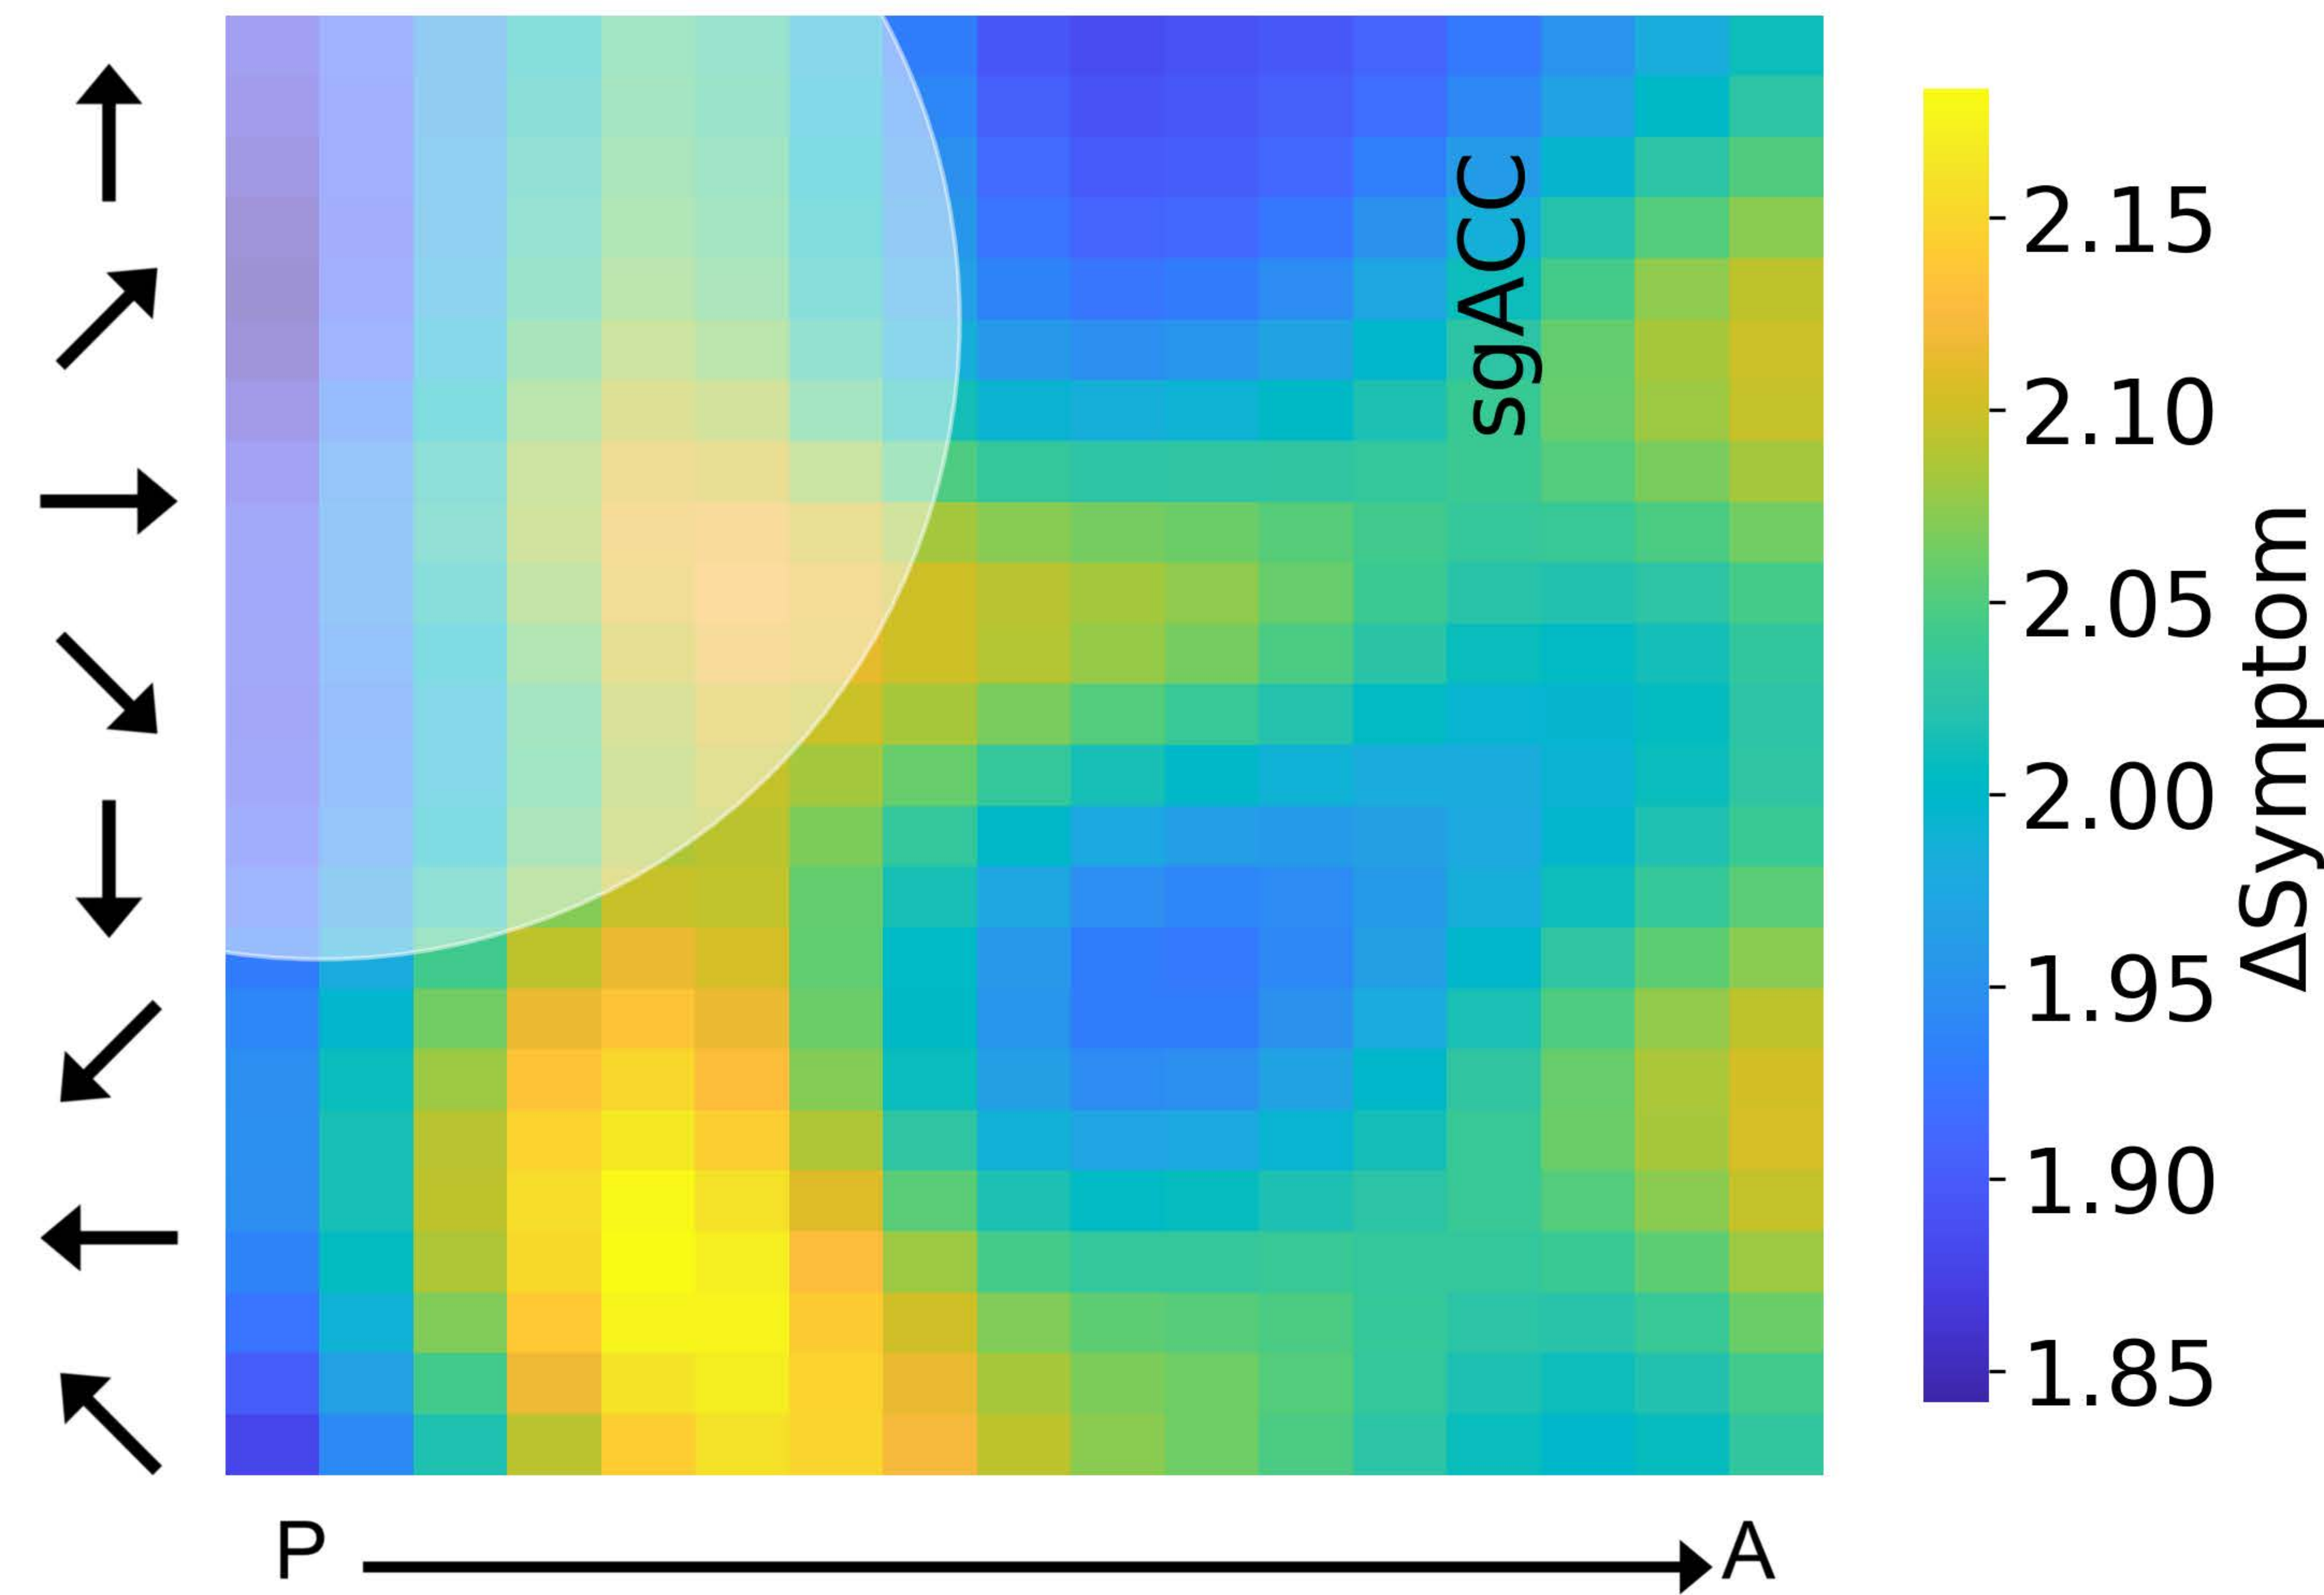



# NDARPW706YNA\_hamd\_left\_dlpfc

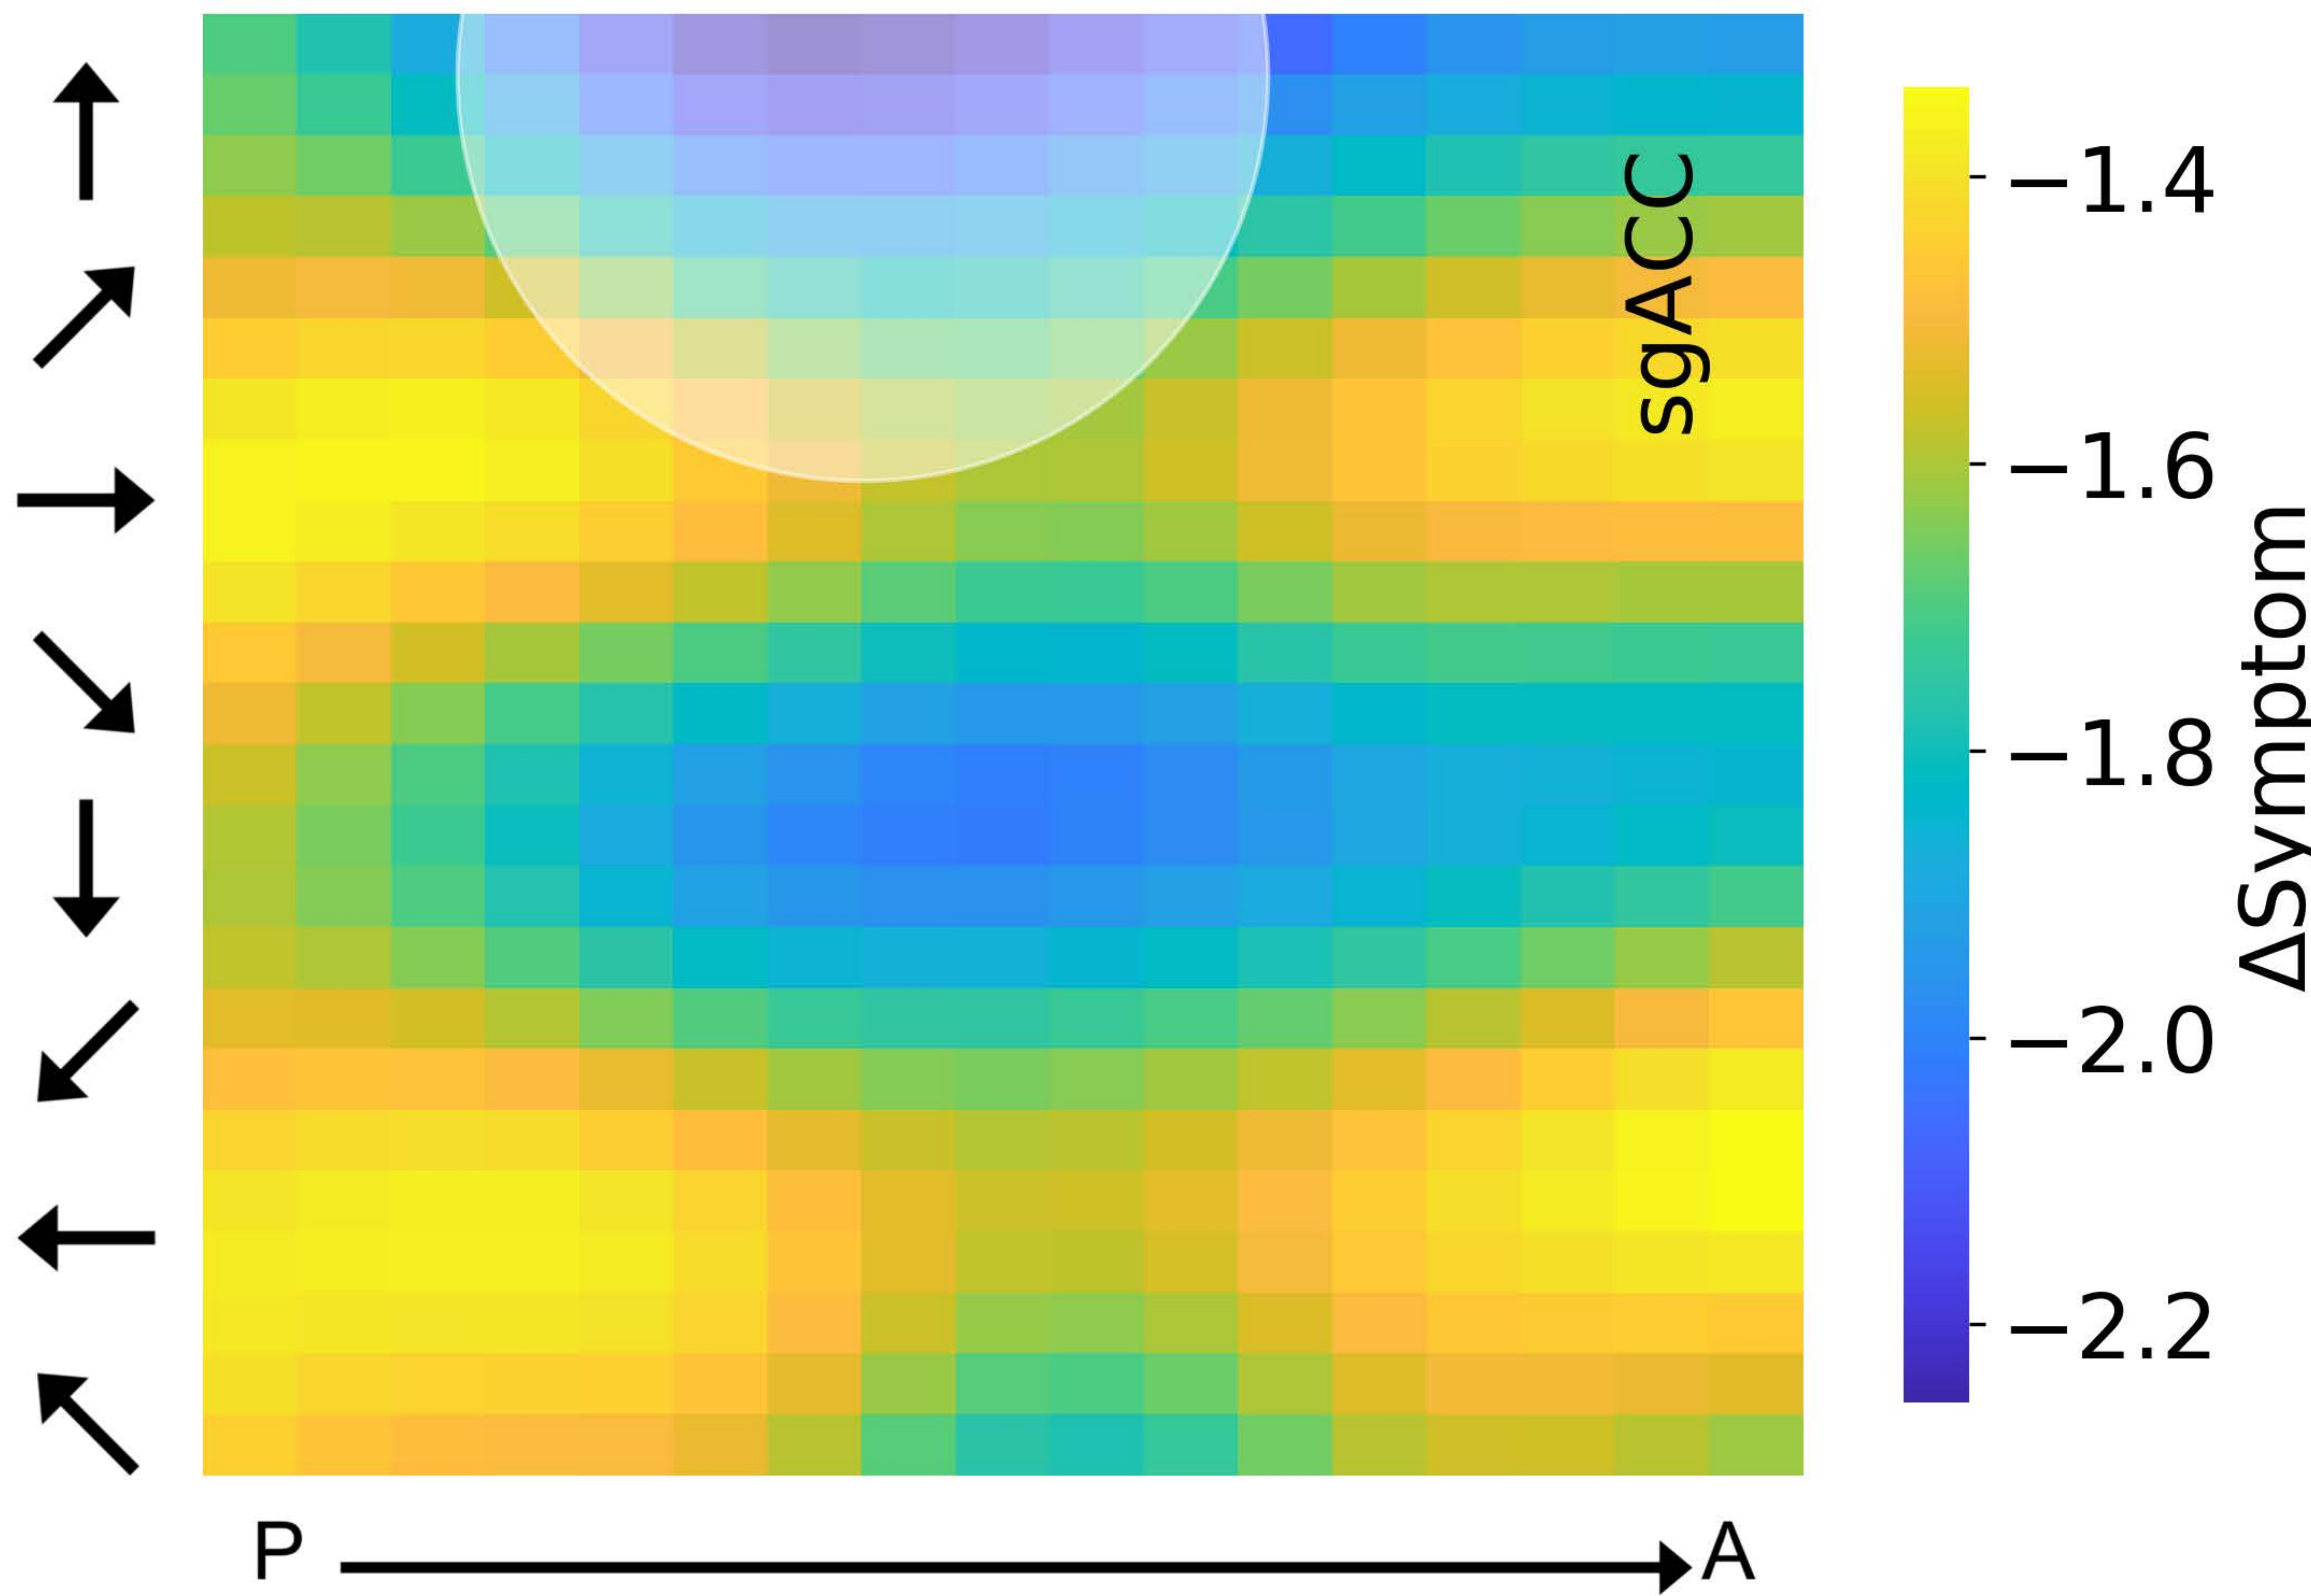



# NDARPZ537YY0\_hamd\_left\_dlpfc

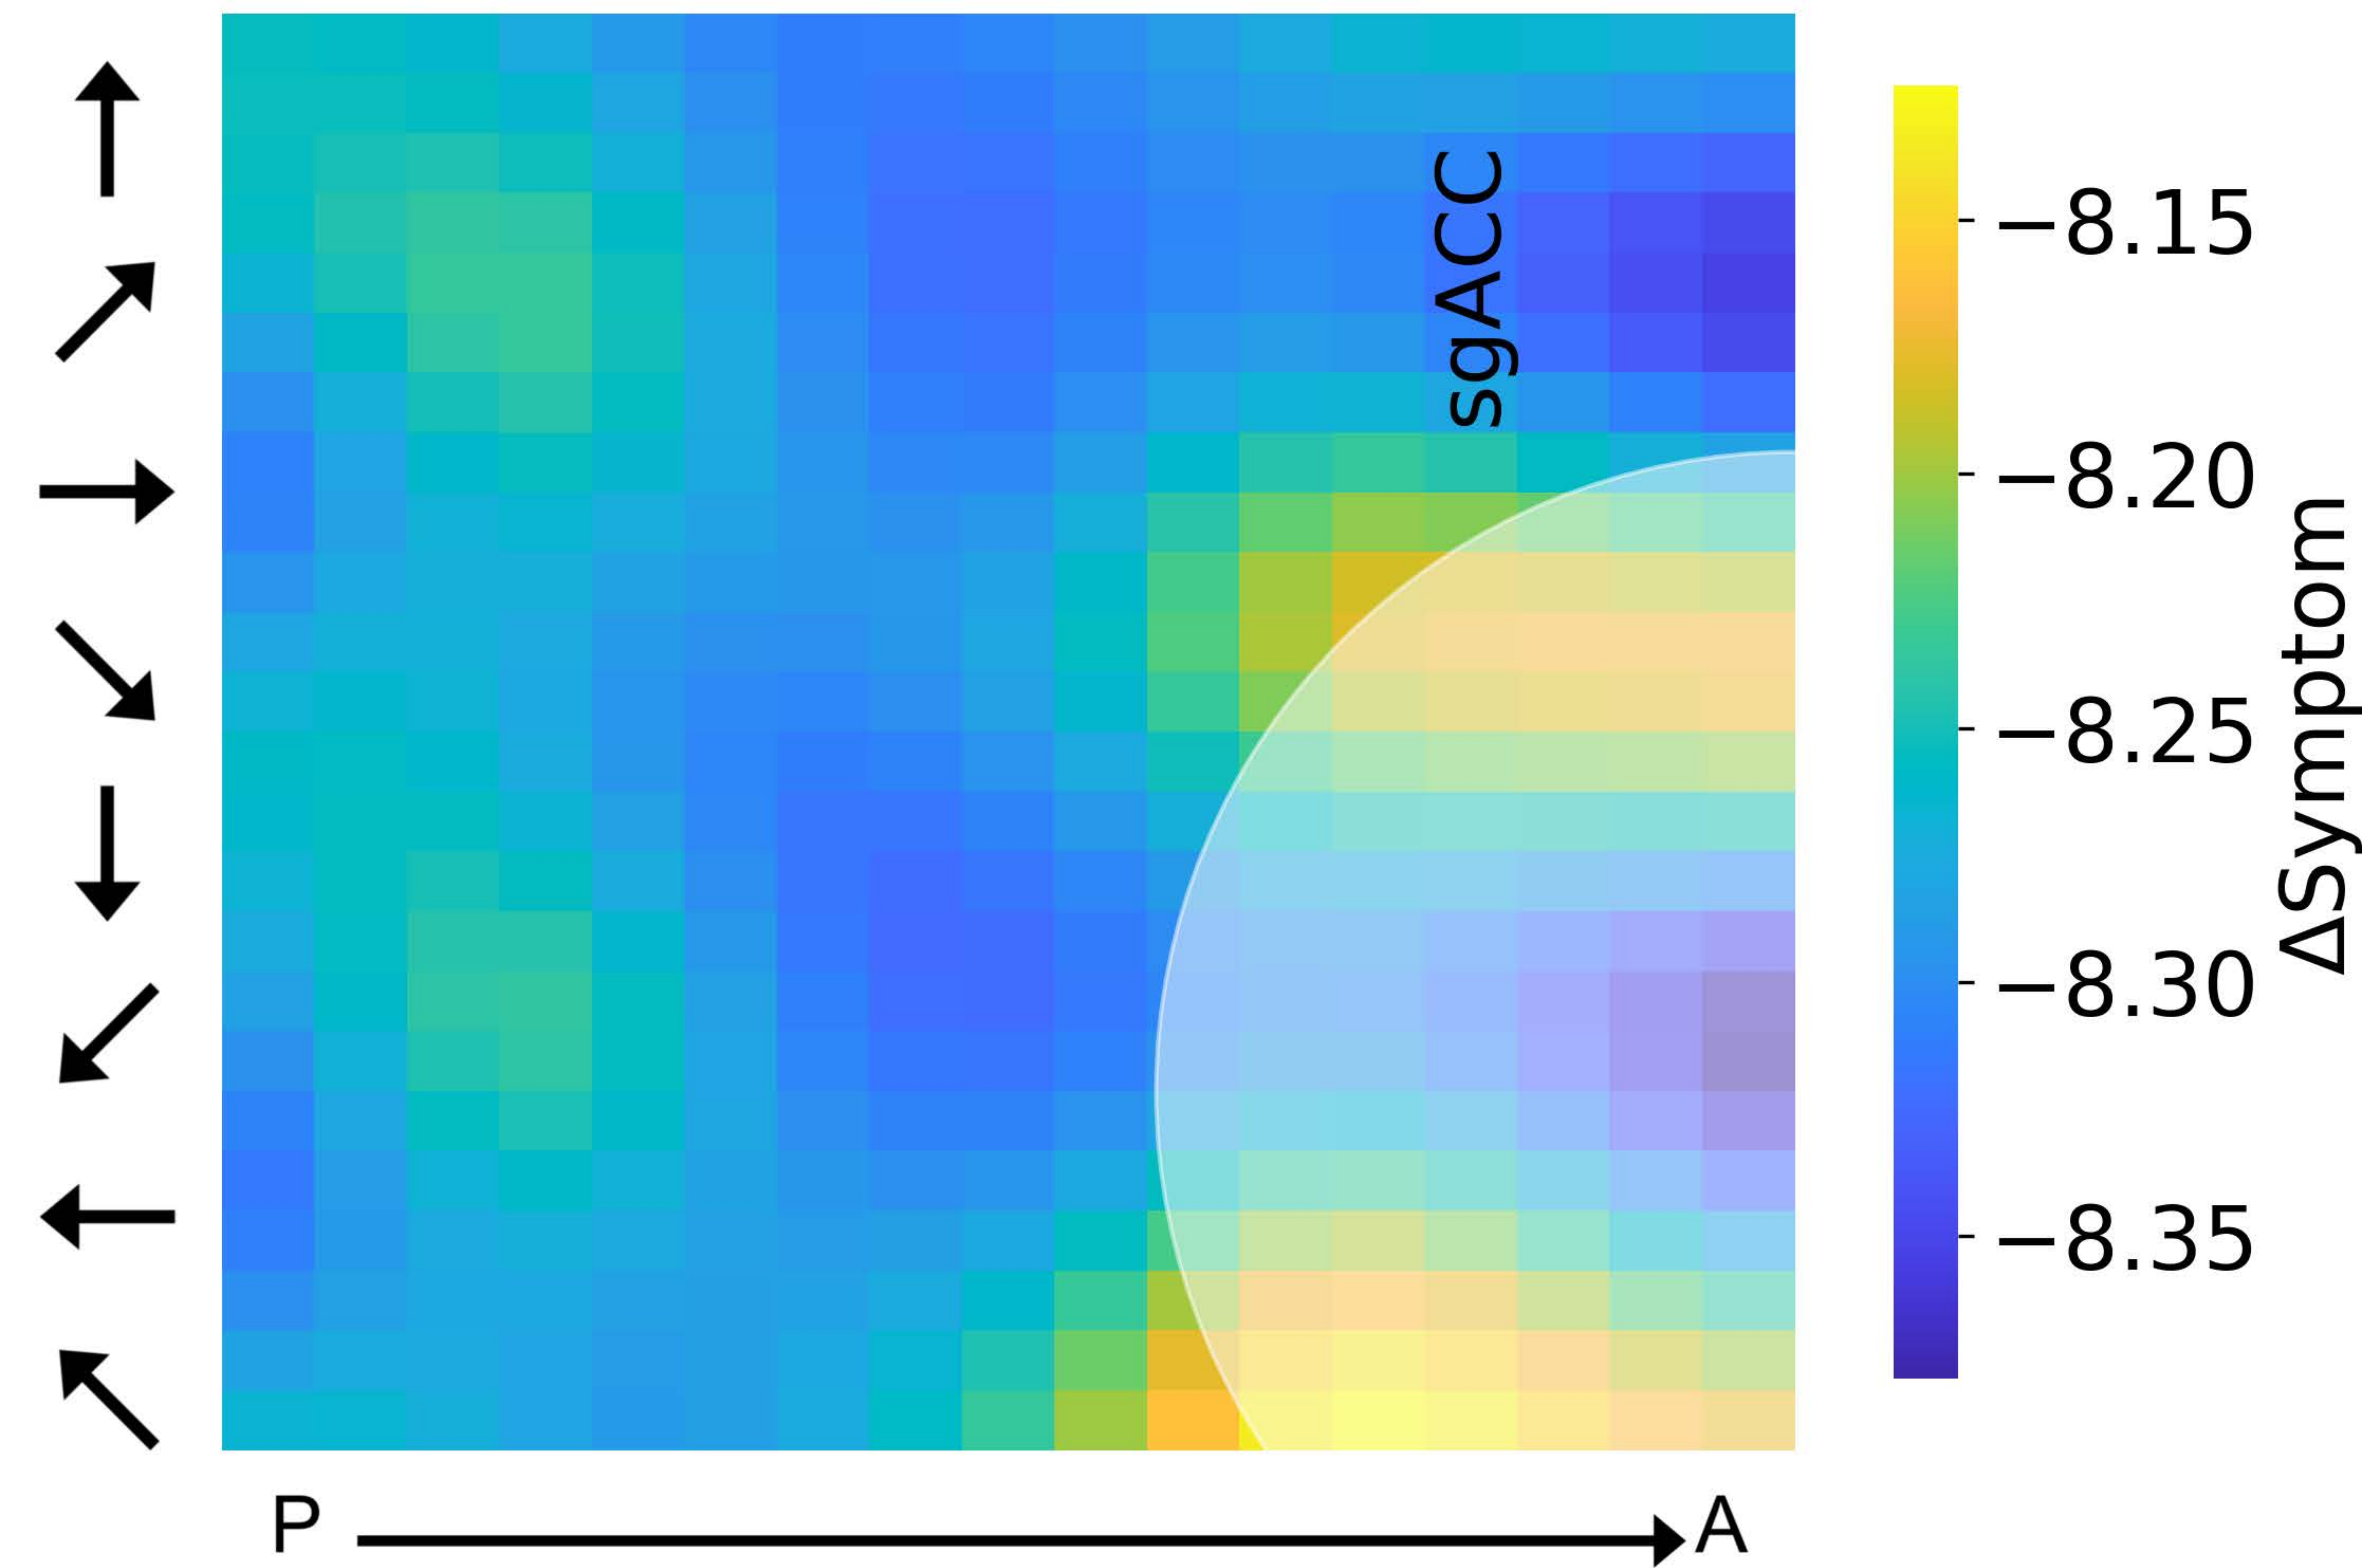



# INDARRRD555DDH\_hamd\_left\_dlpfc

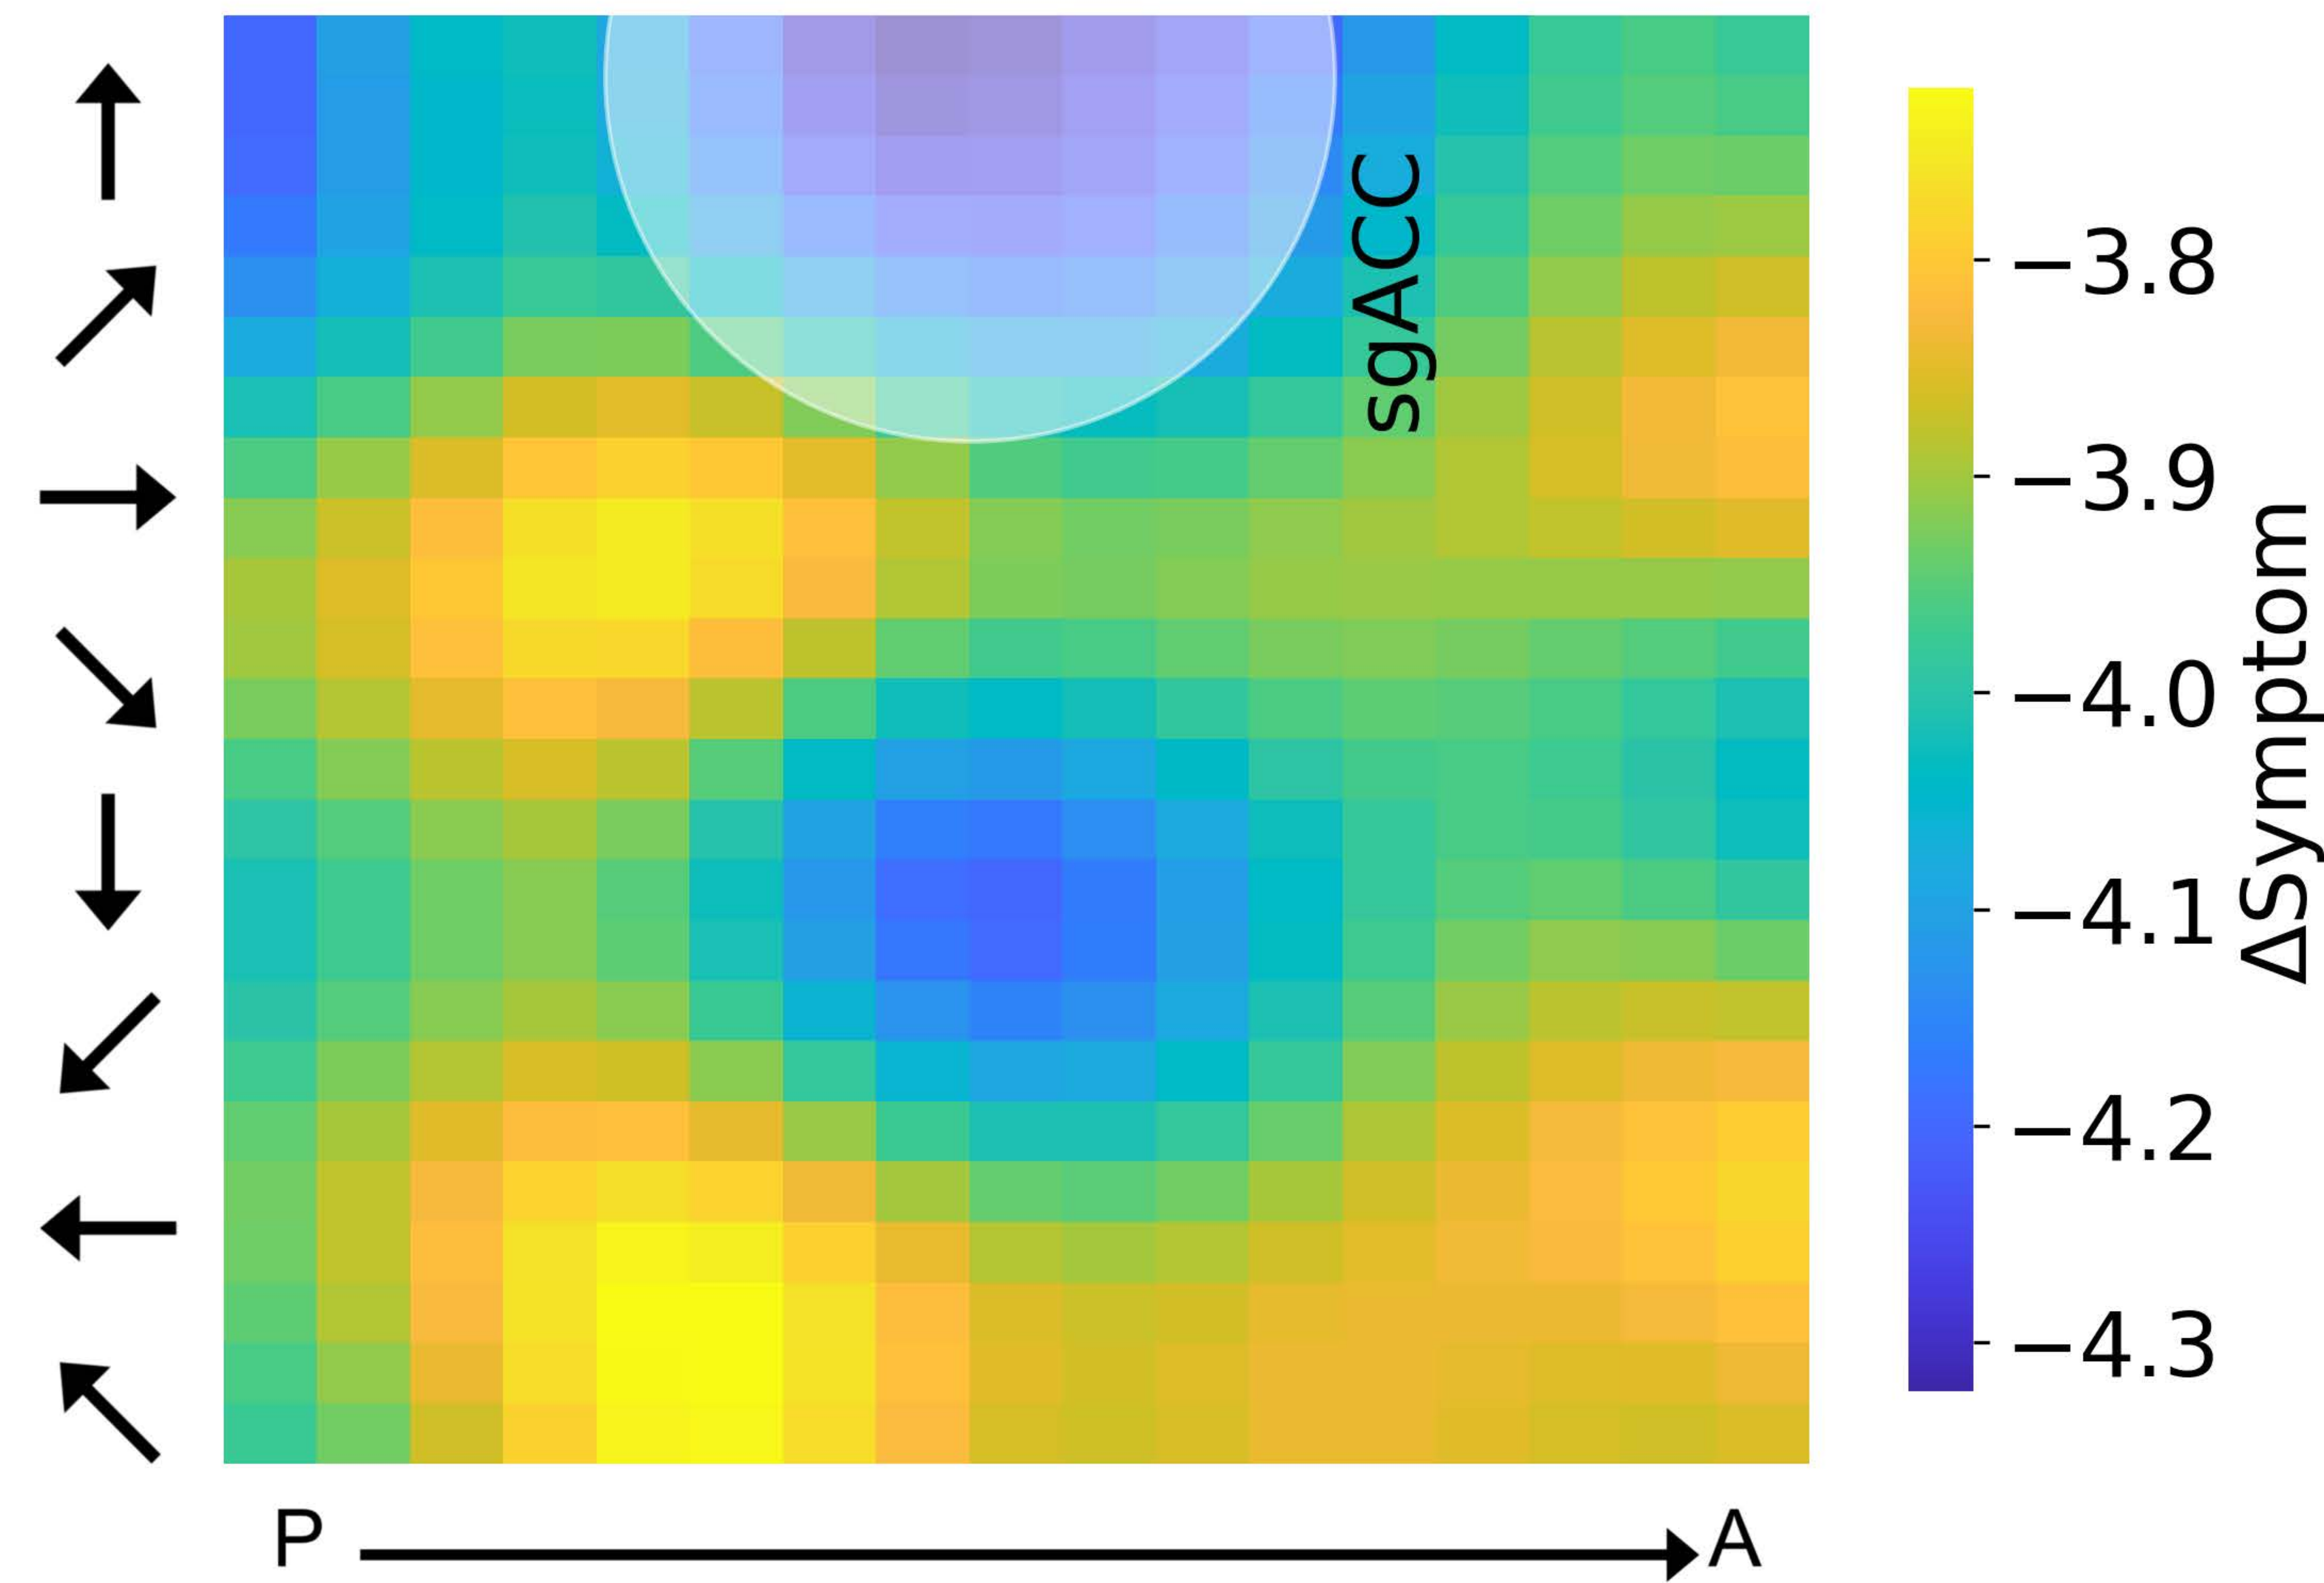



# NDARRRF879TA3\_hamd\_left\_dlpfc

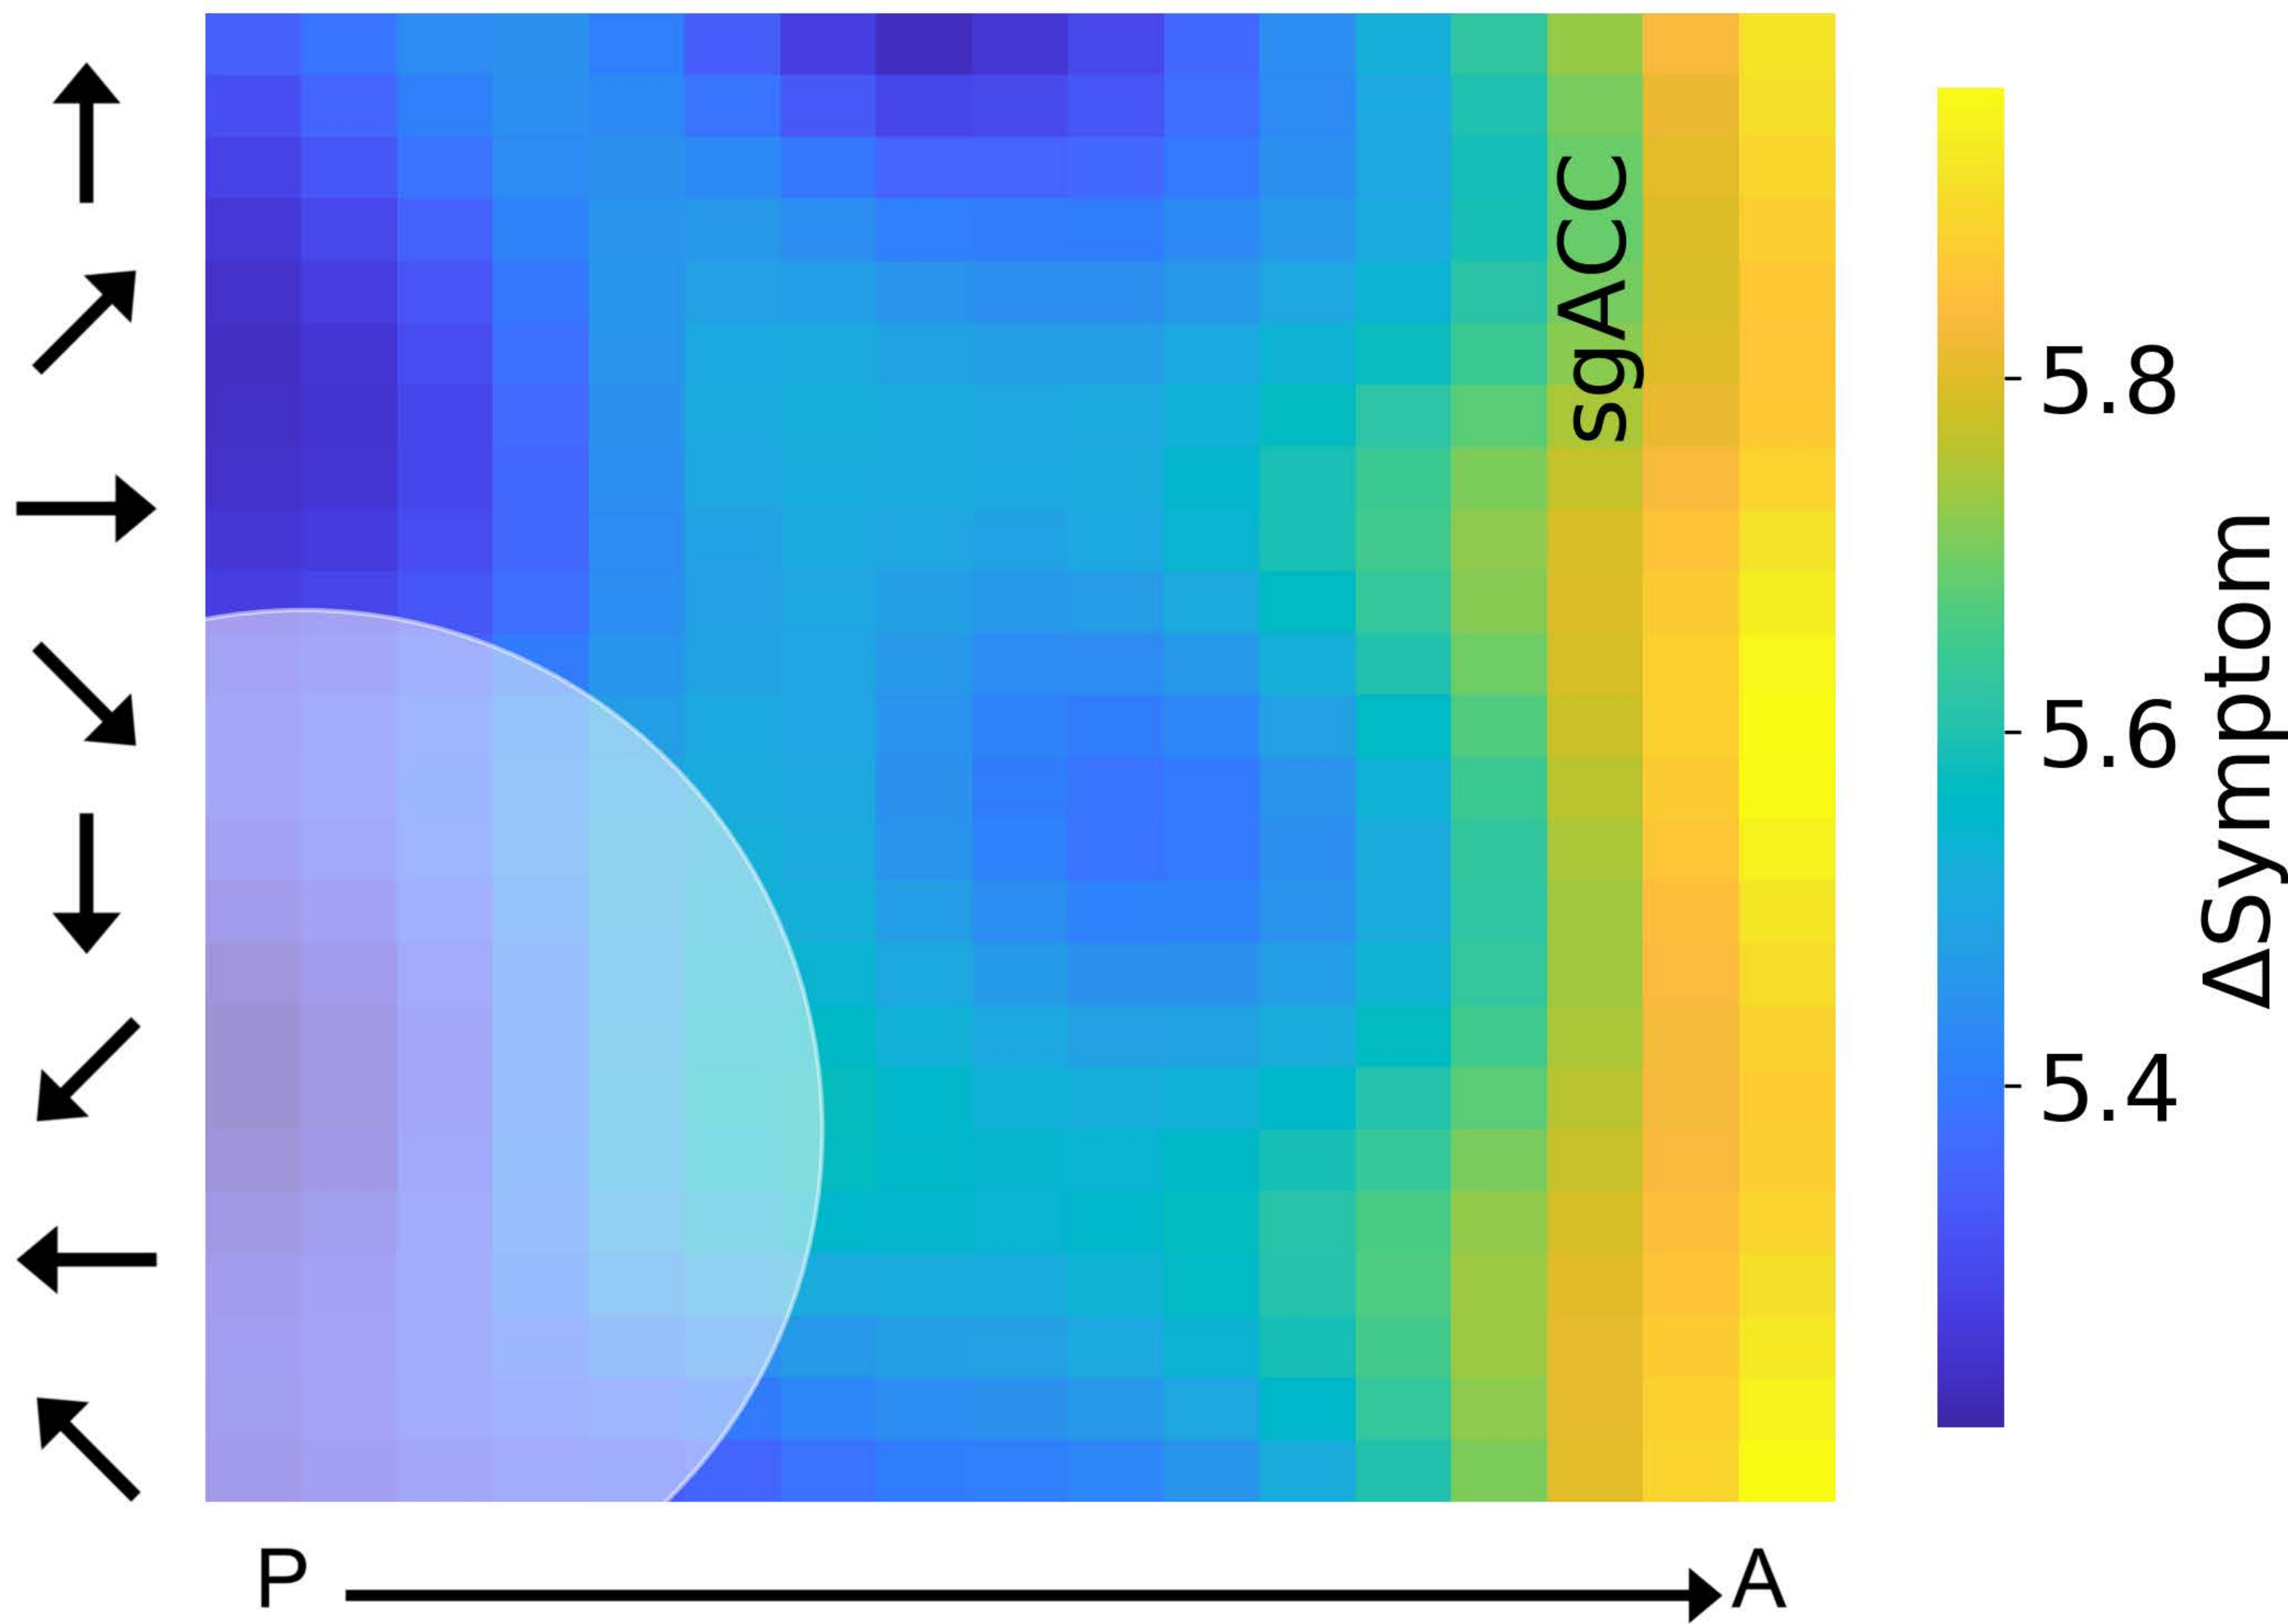



# INDARRRG943WGE\_hamd\_left\_dlpfc

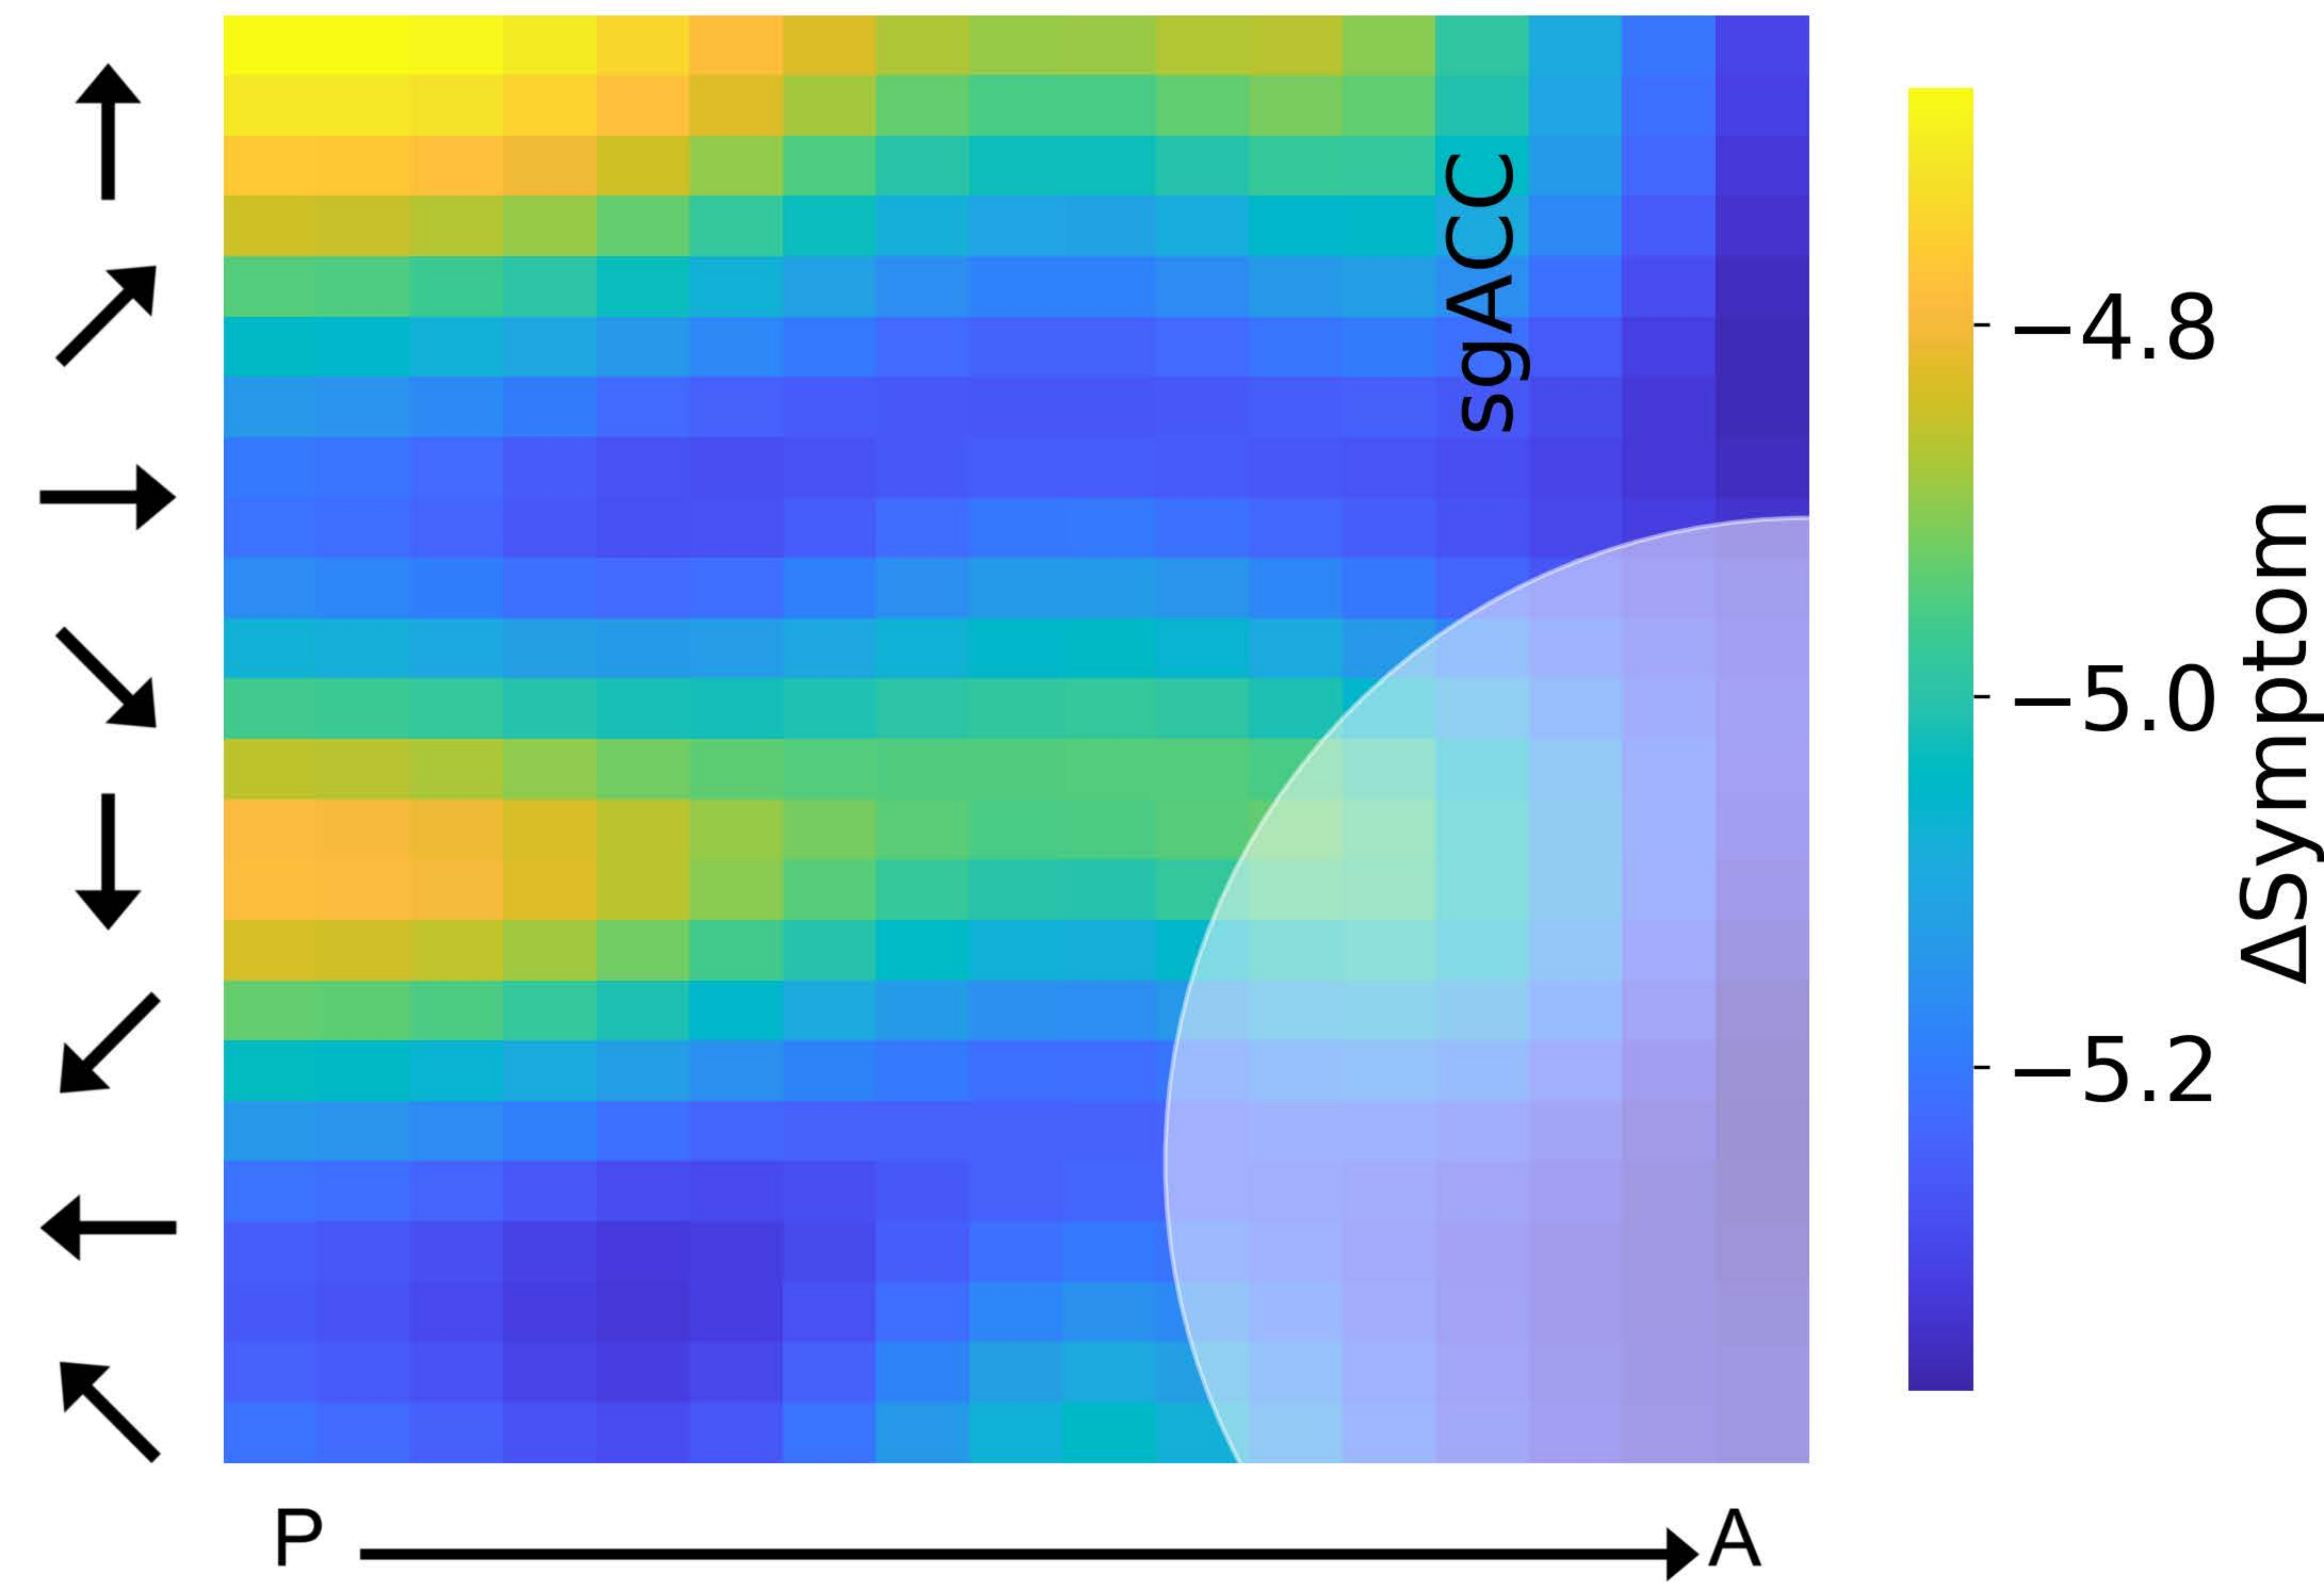



# NDARRM328EP8\_hamd\_left\_dlpfc

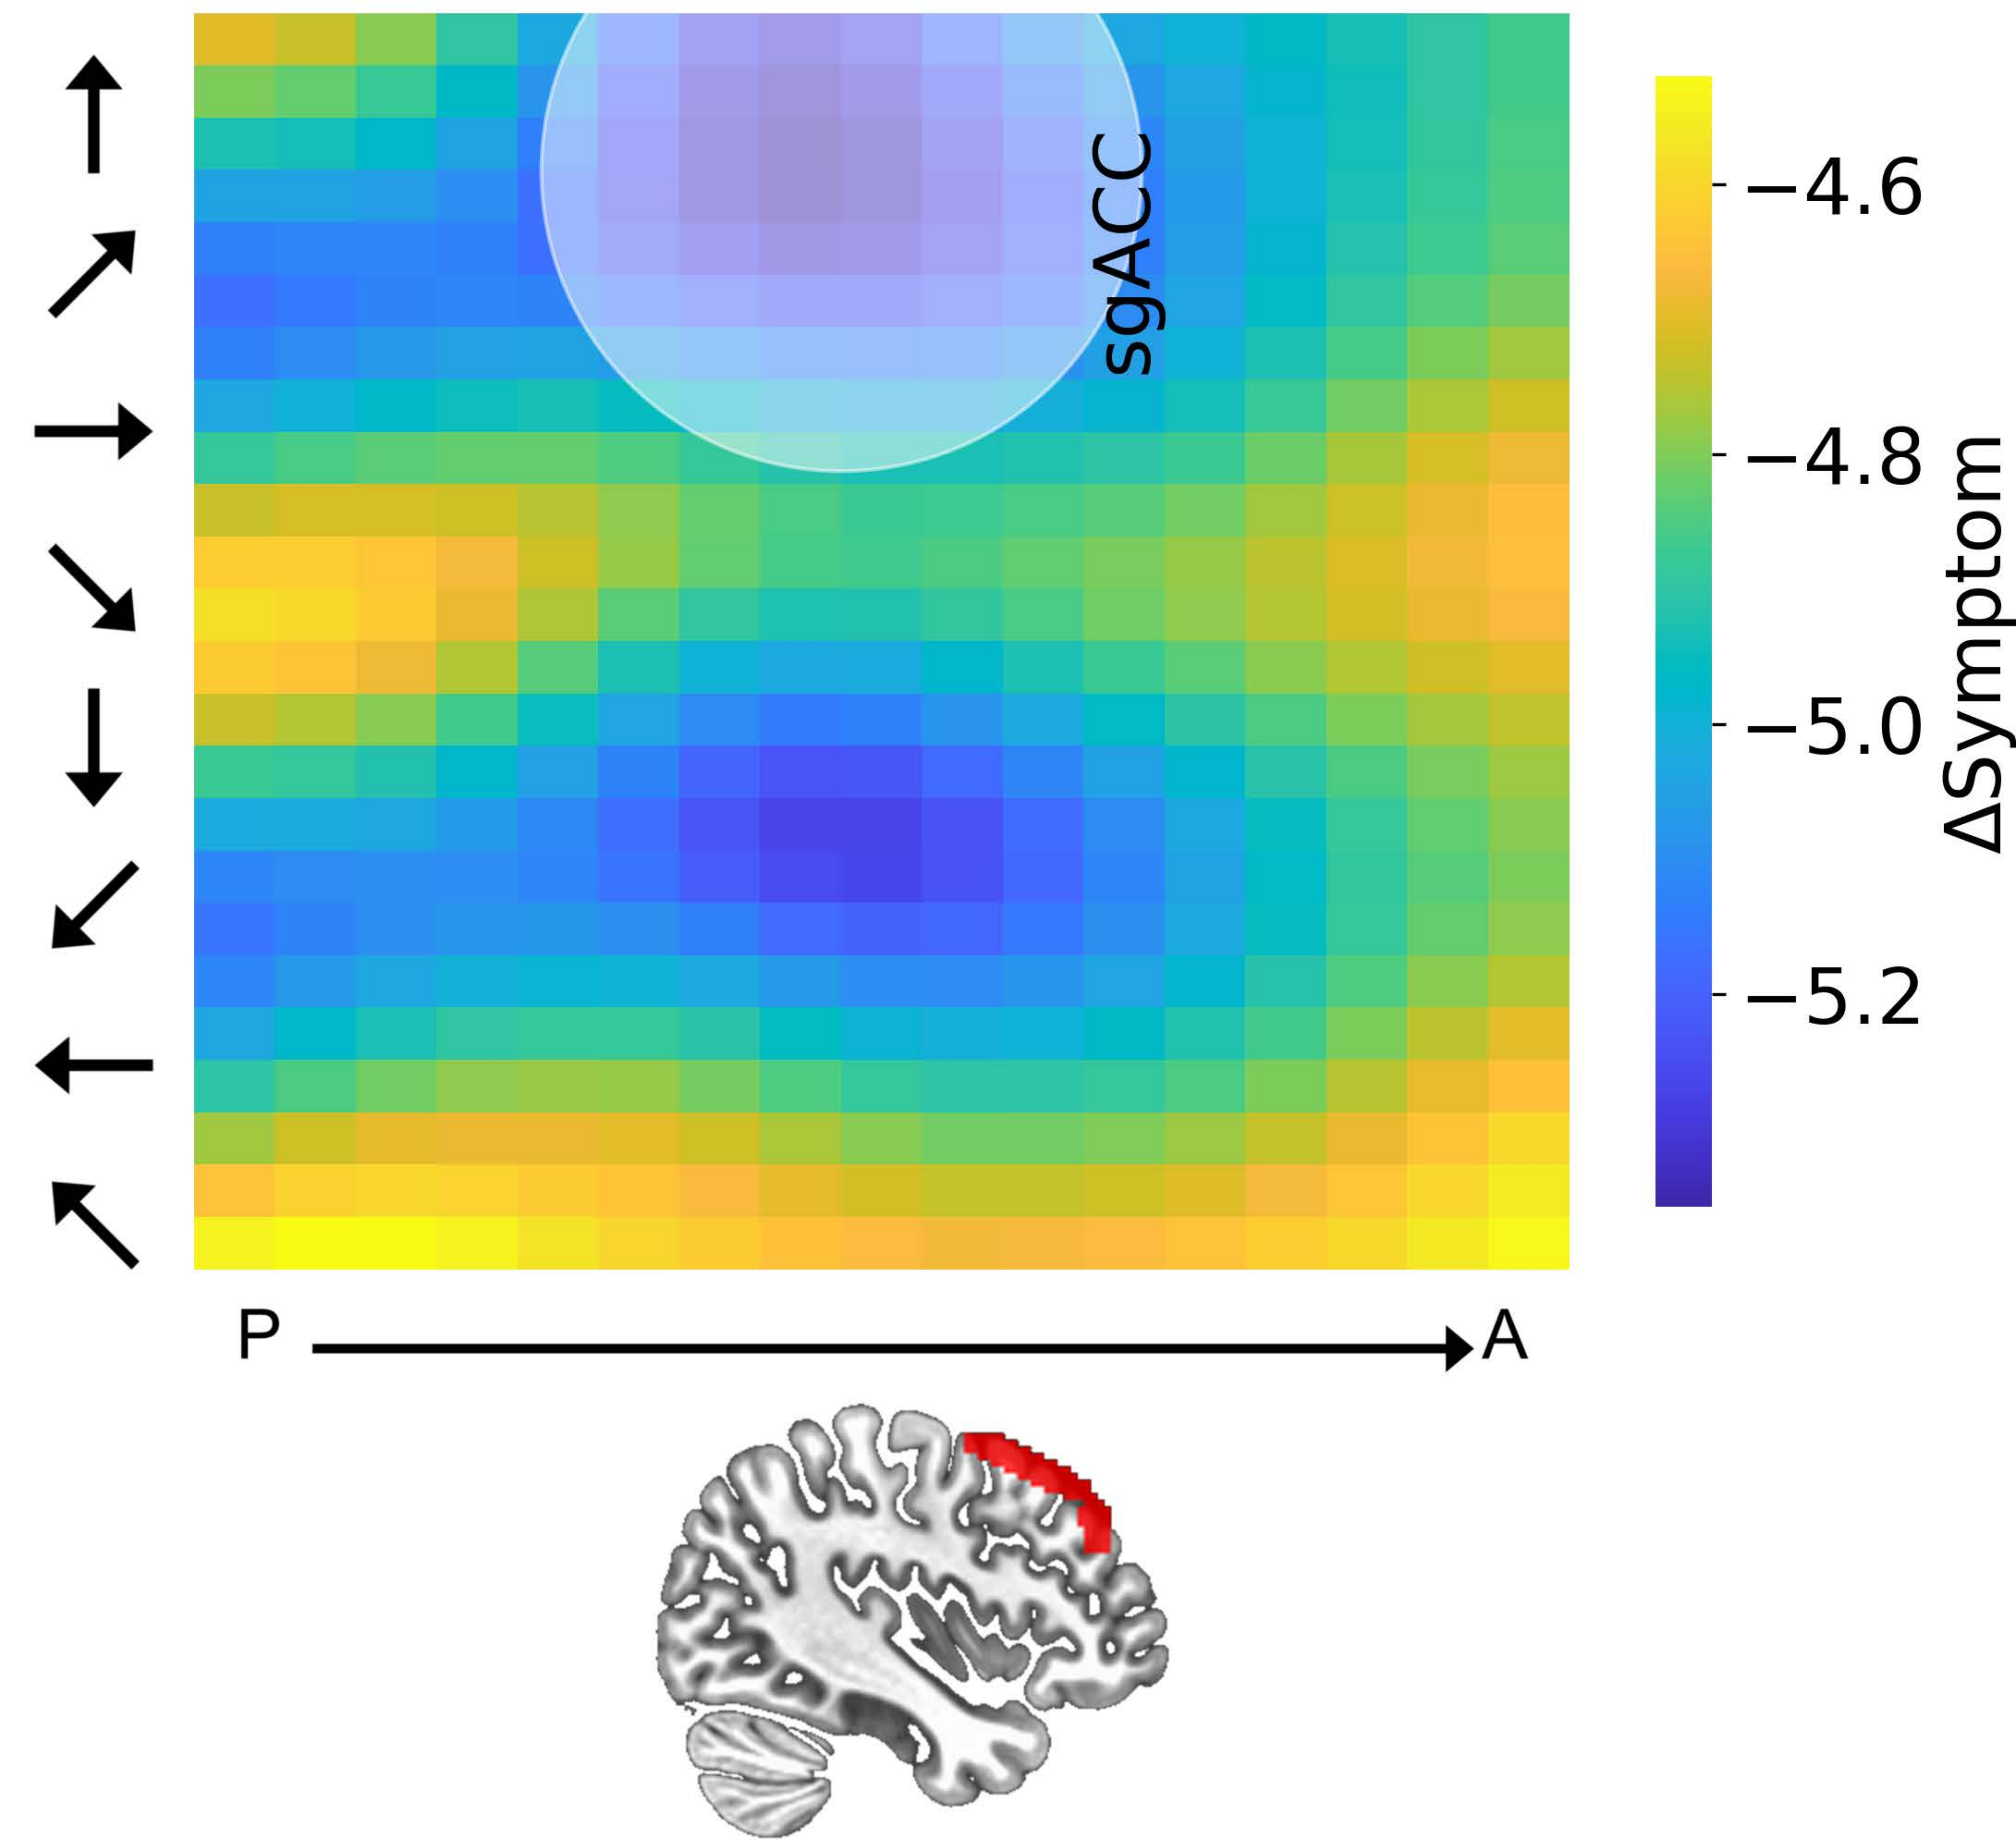



# NDARRRZ612NKG\_hamd\_left\_dlpfc

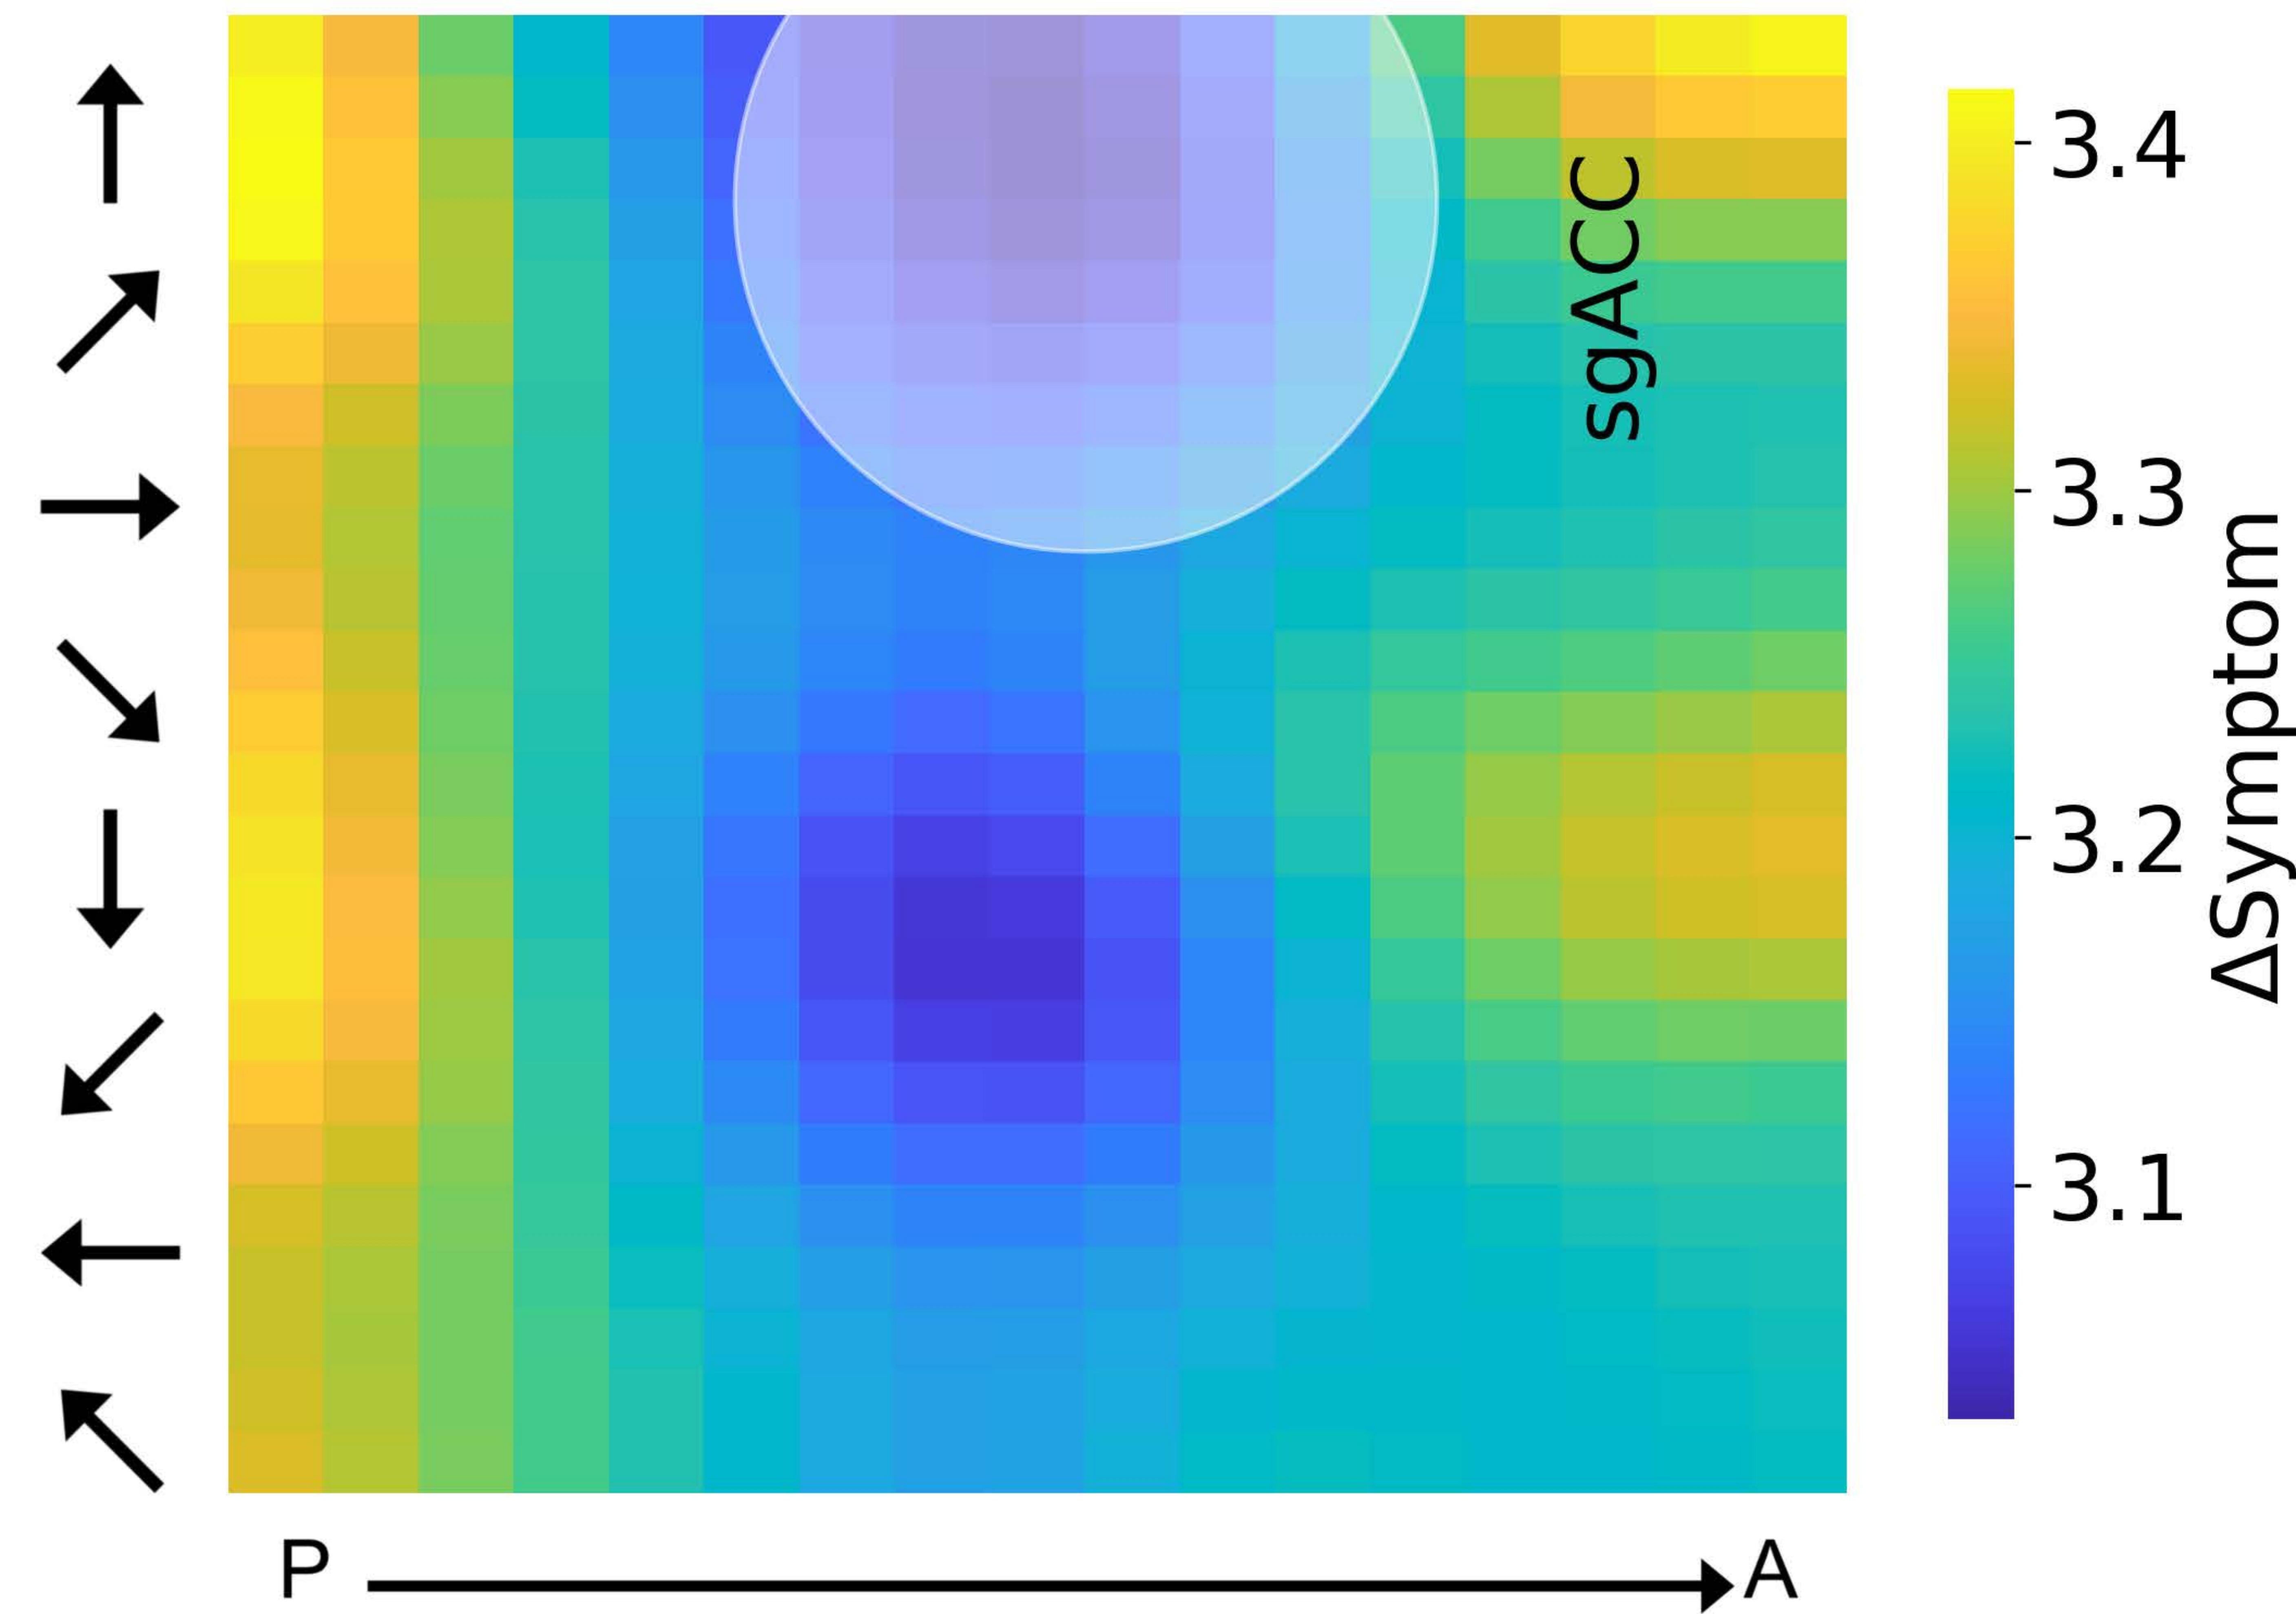



# INDARTH509MNV\_hamd\_left\_dlpfc

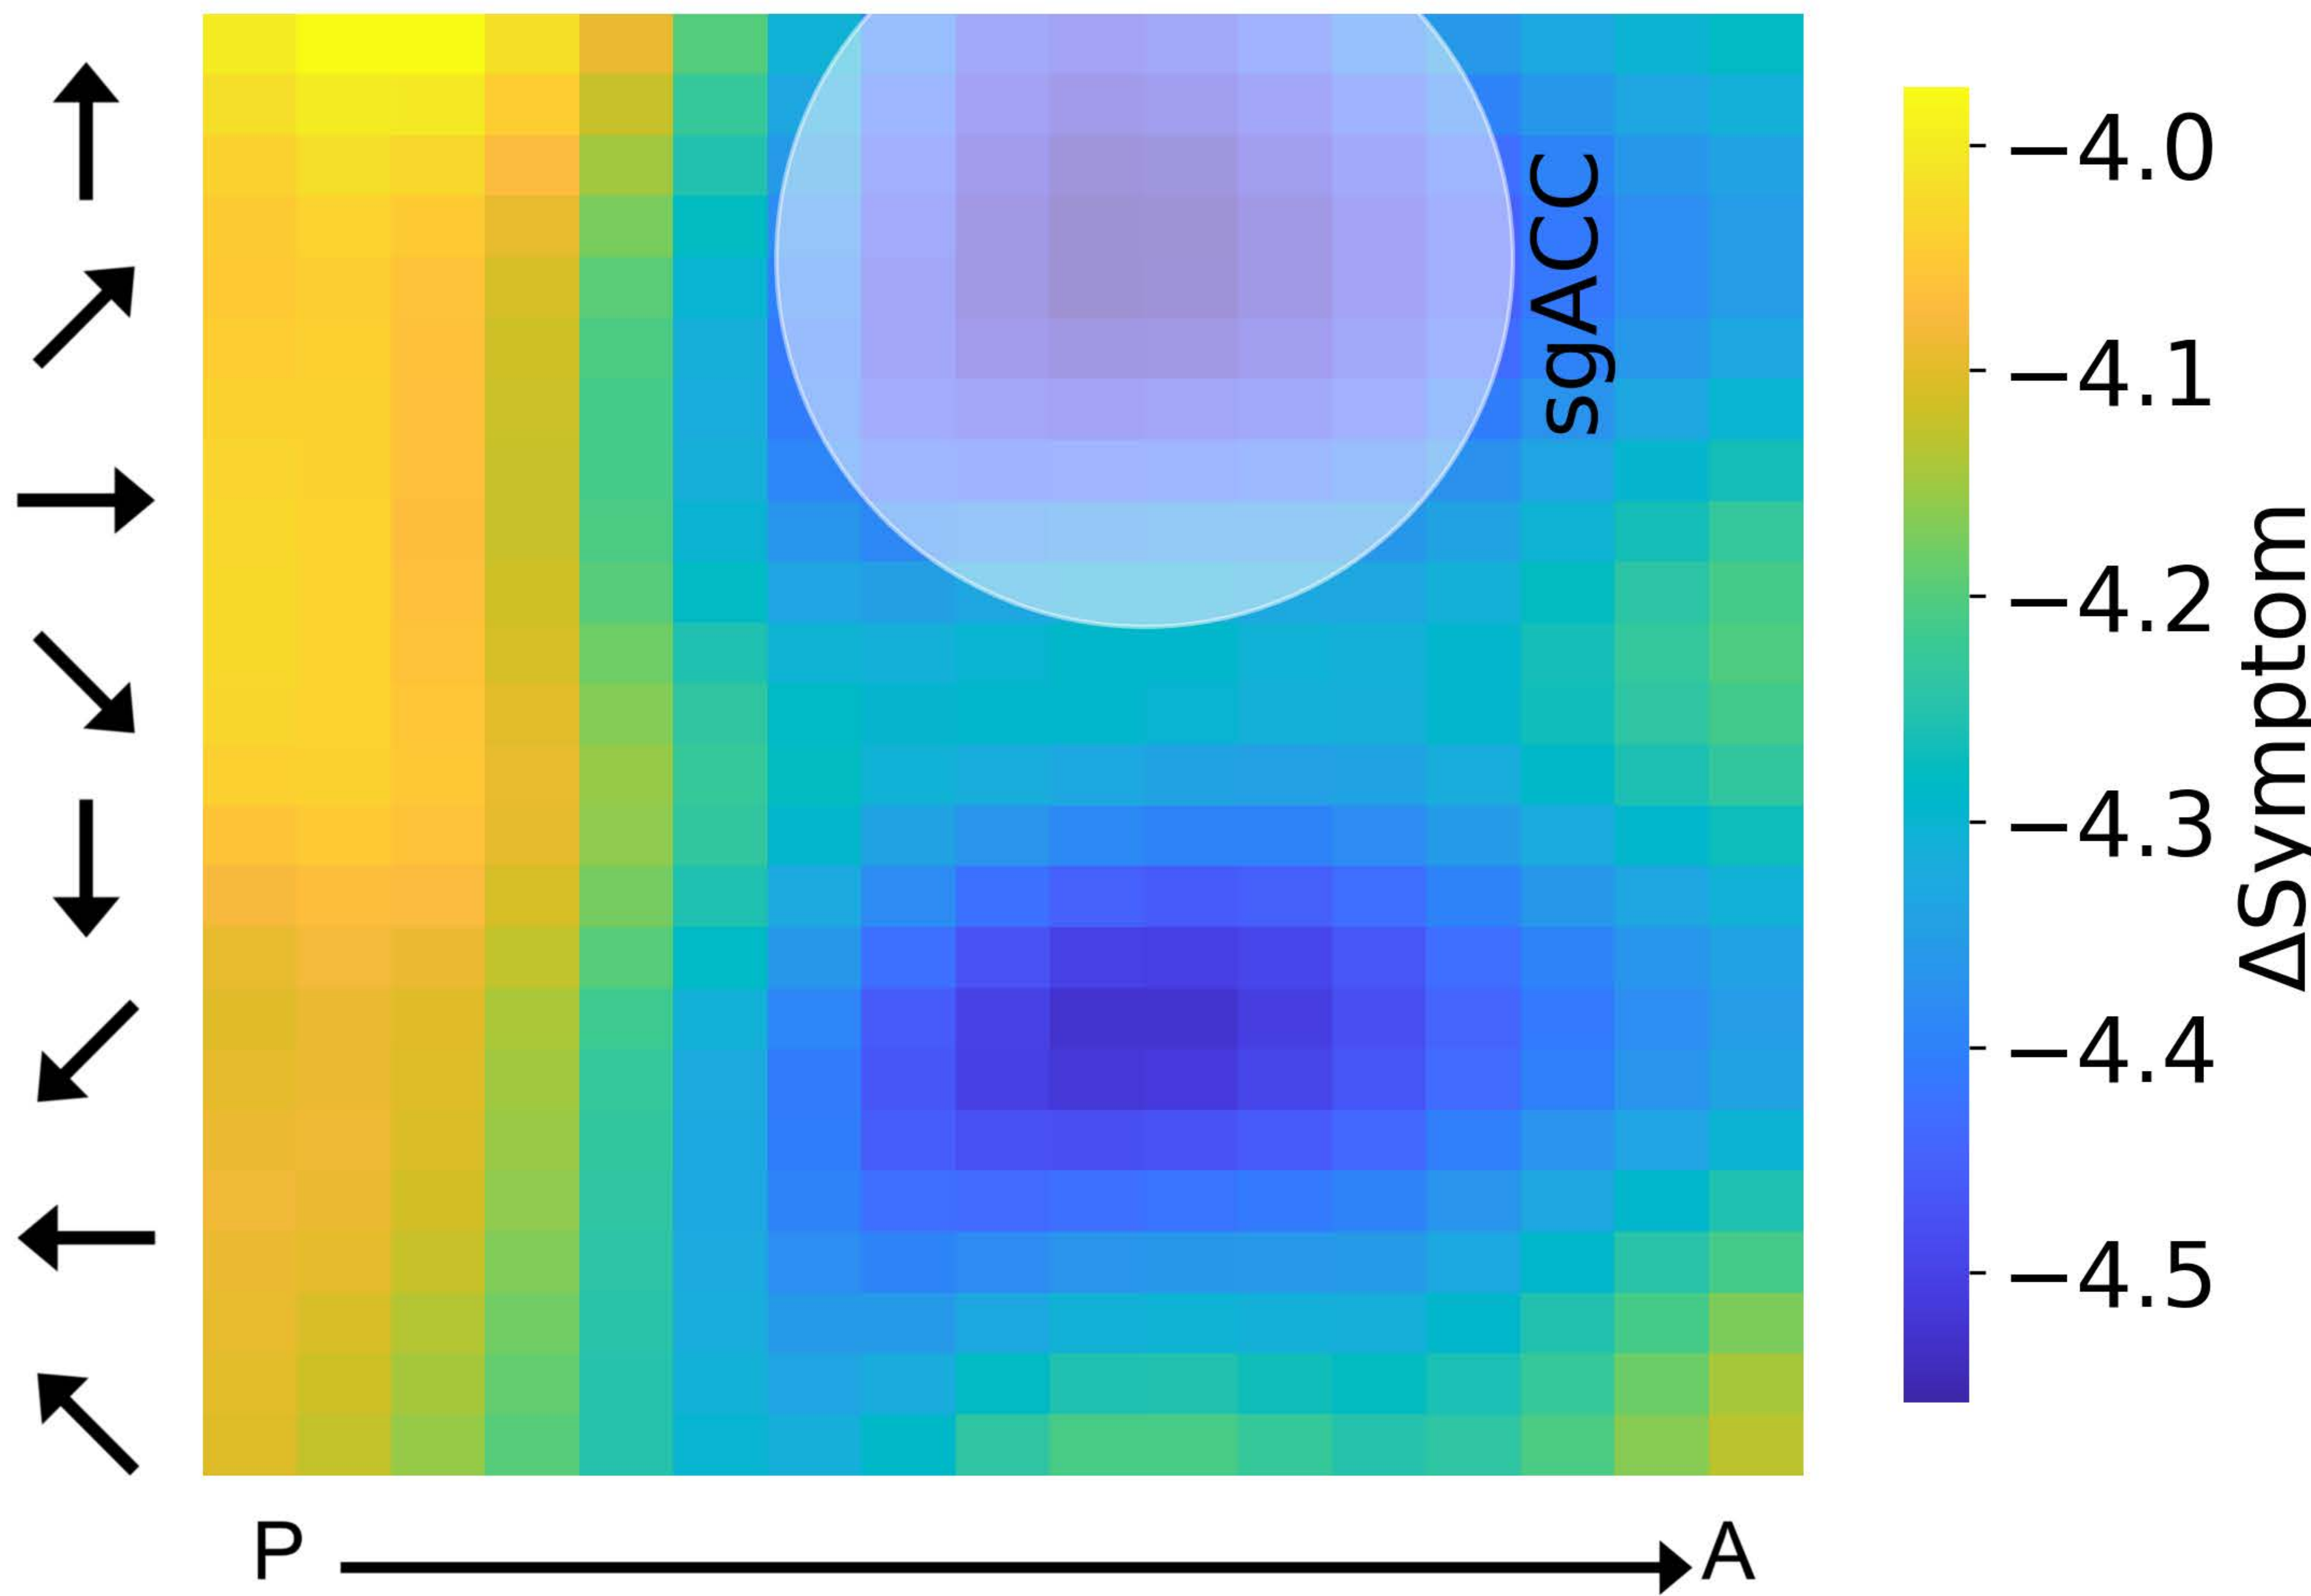



# NDARTT796GJK\_hamd\_left\_dlpfc

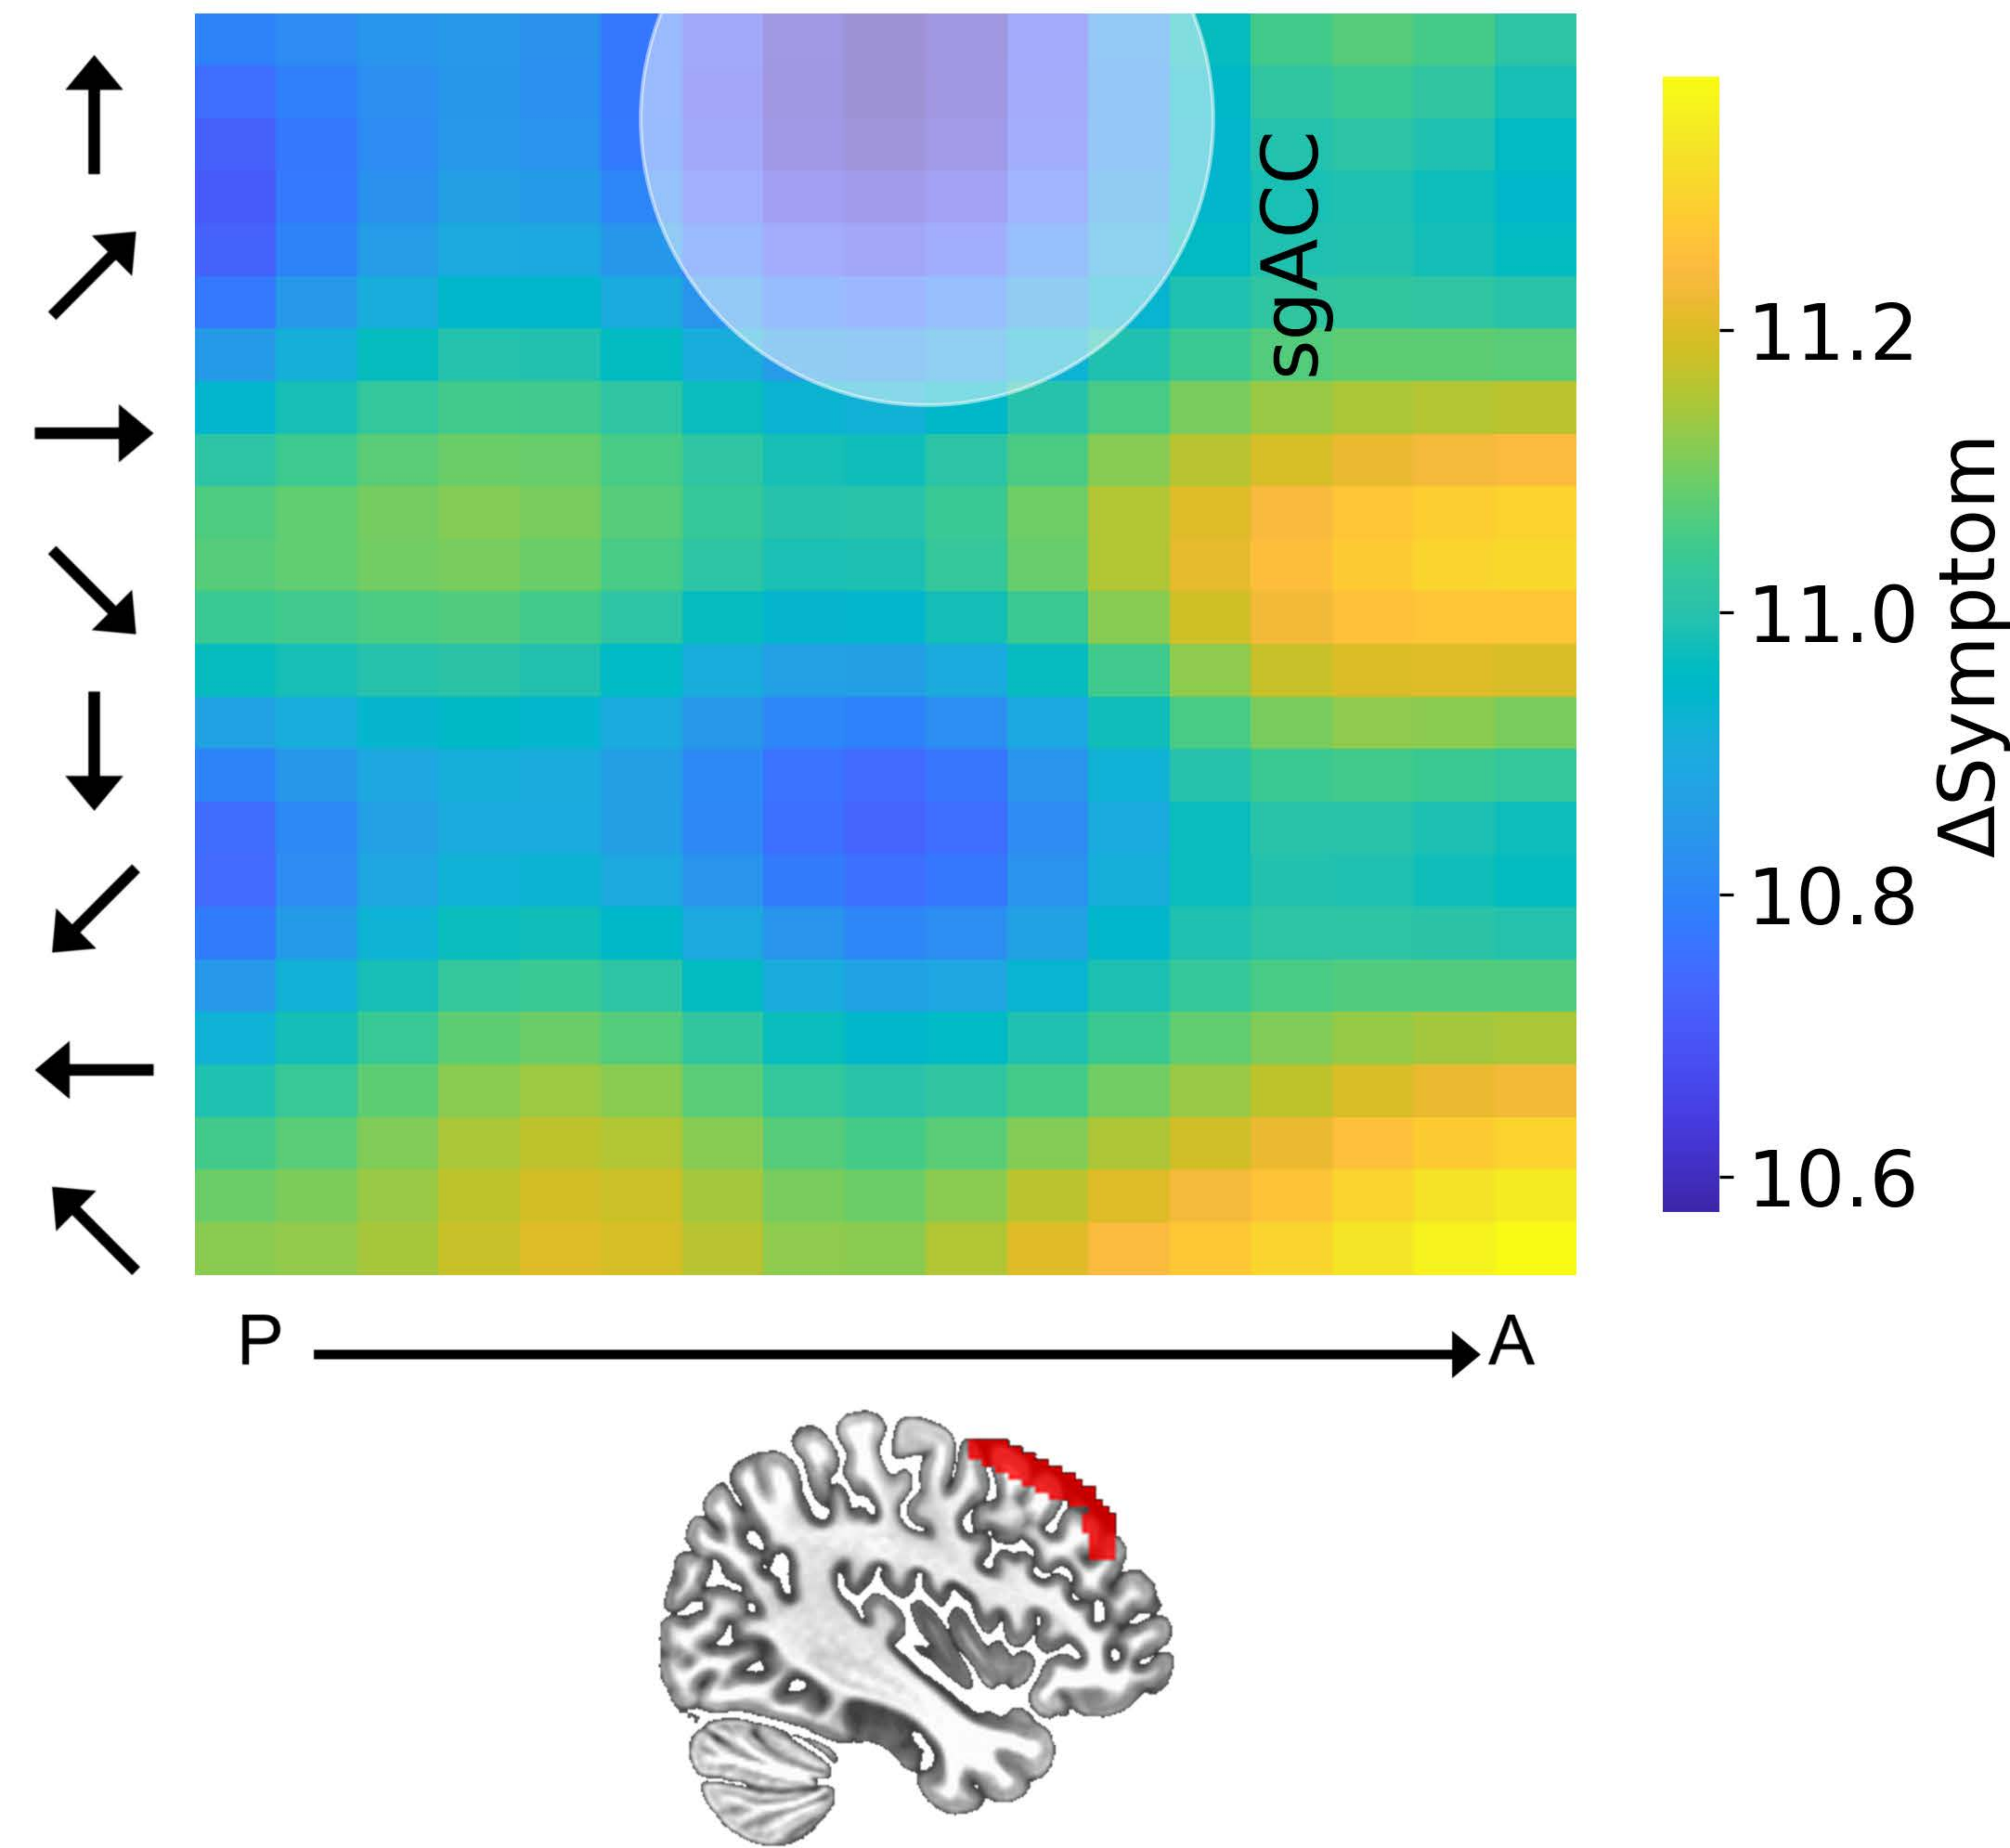



# NDARTZ590DYE\_hamd\_left\_dlpfc

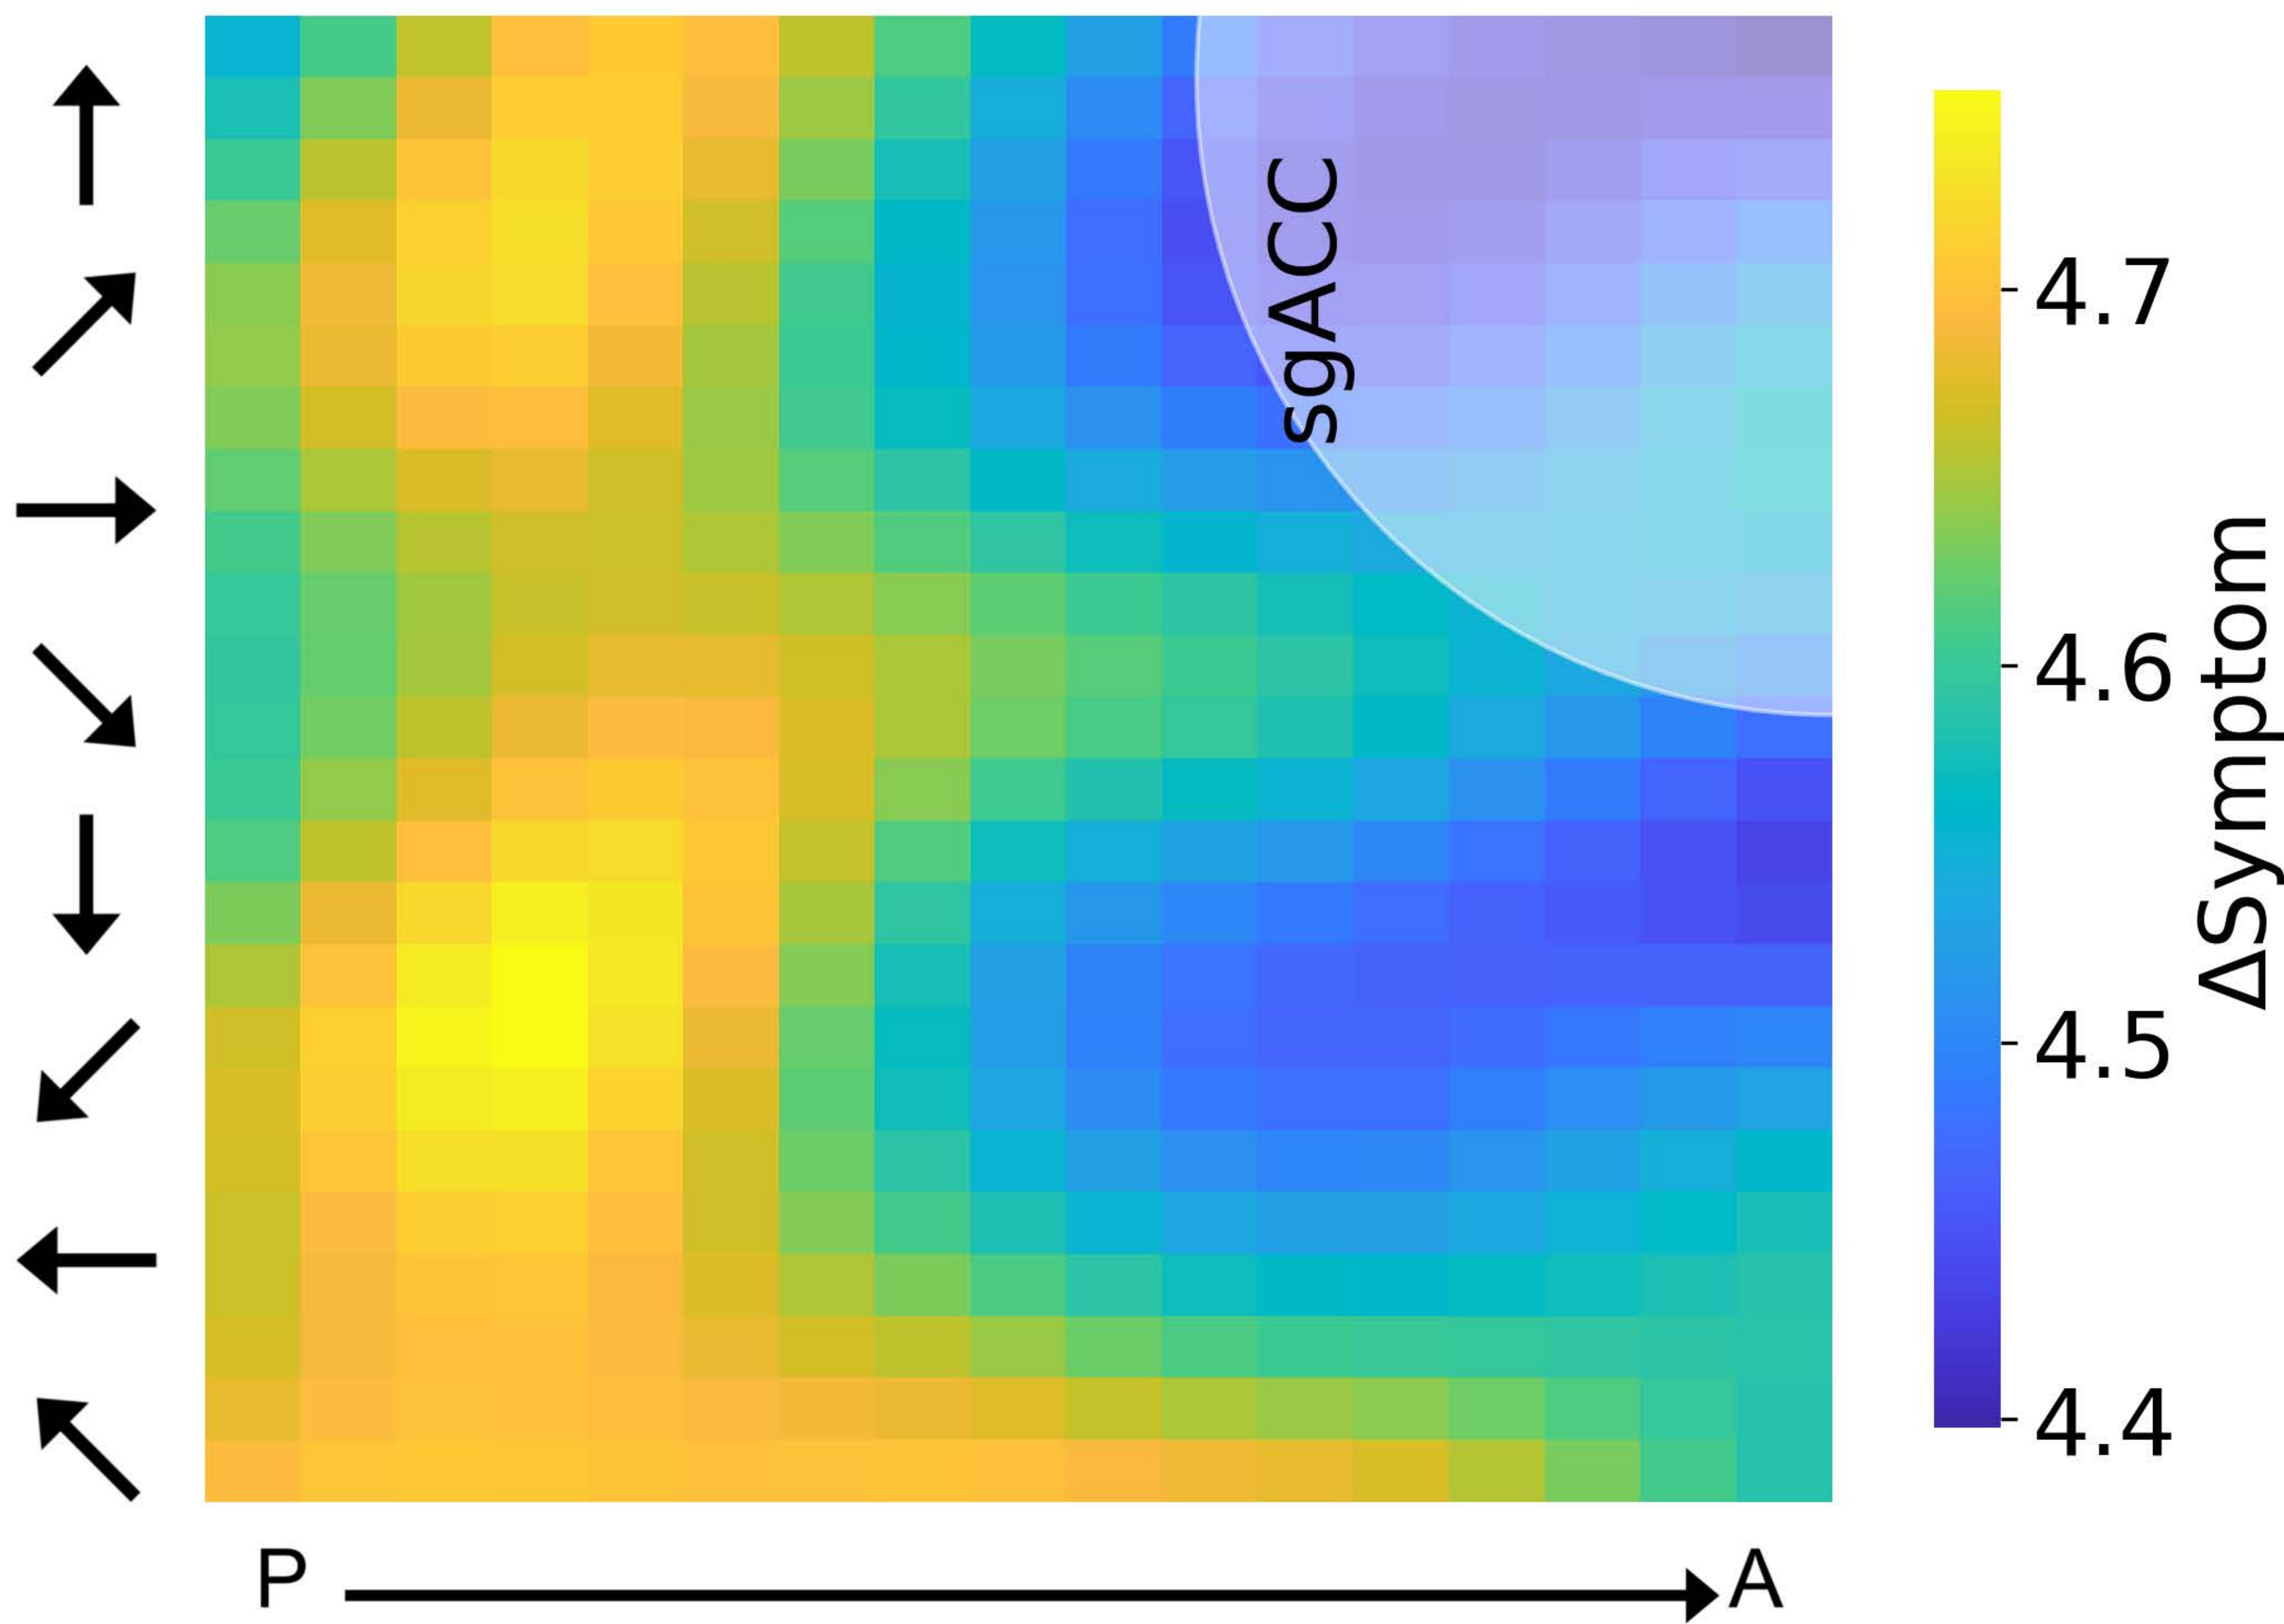



# NDARUJ223ZPN\_hamd\_left\_dlpfc

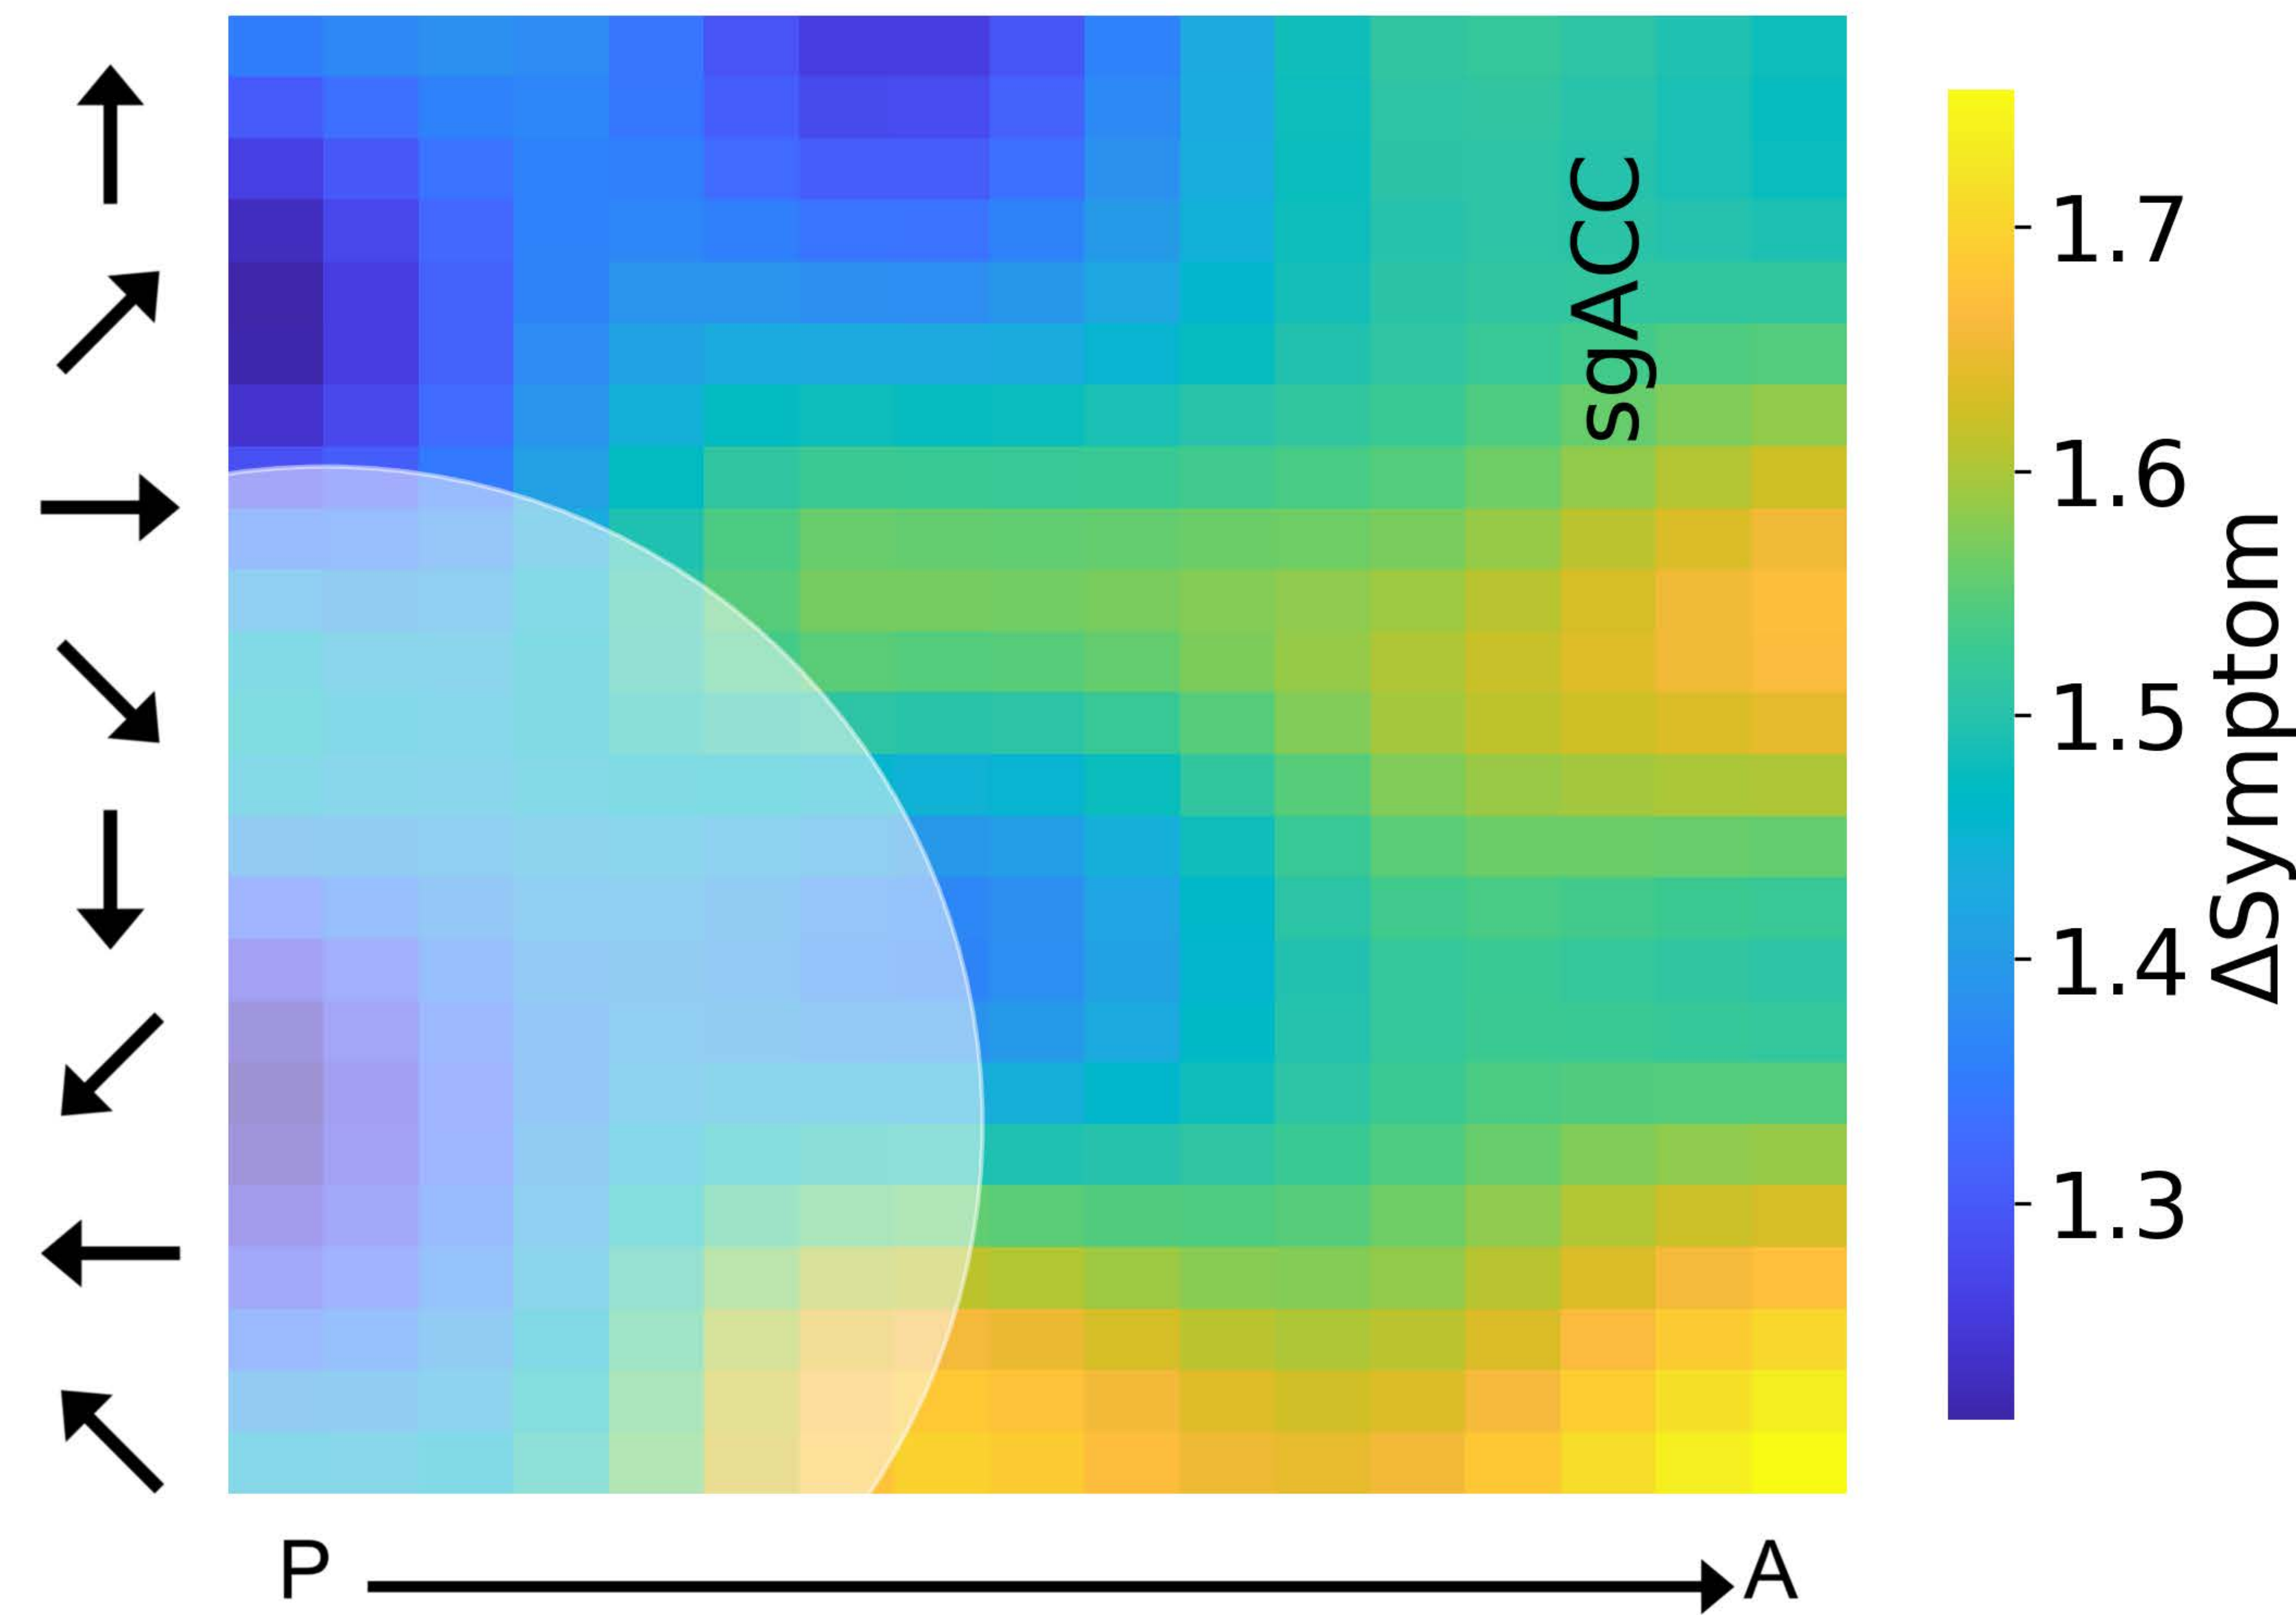



# NDARUM818JC1\_hamd\_left\_dlpfc

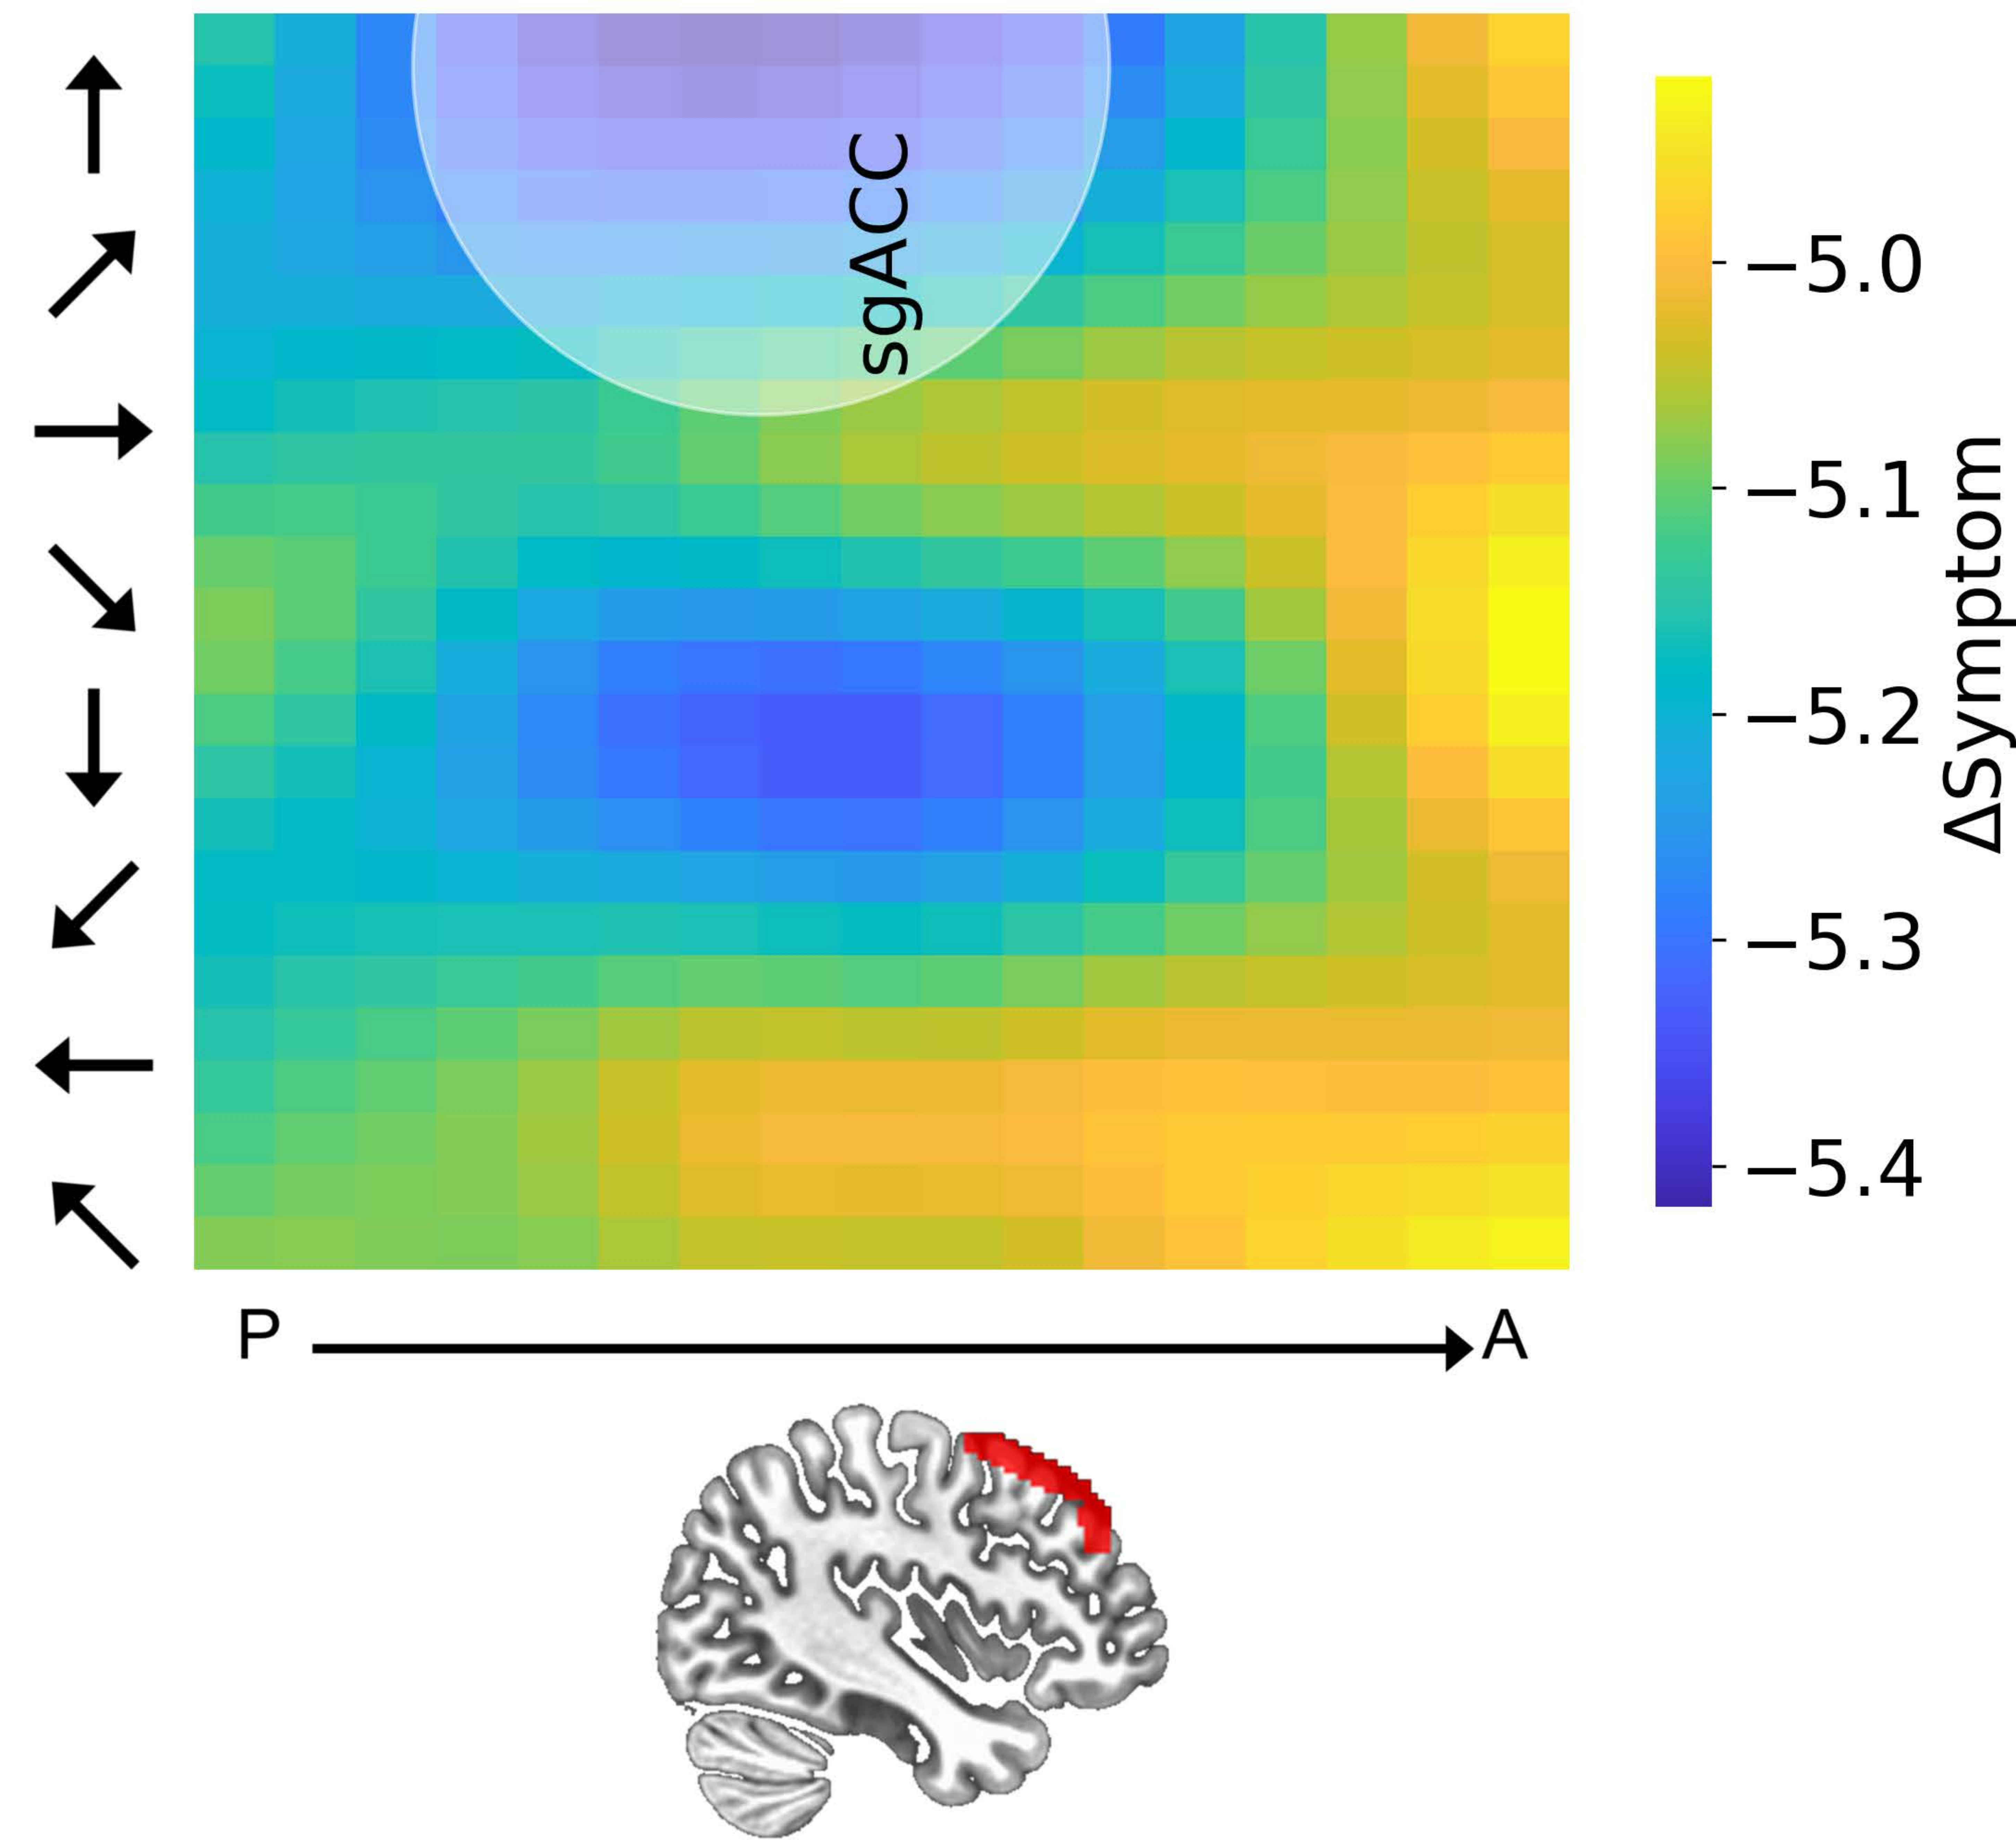



# INDARUT852KUX\_hamd\_left\_dlpfc

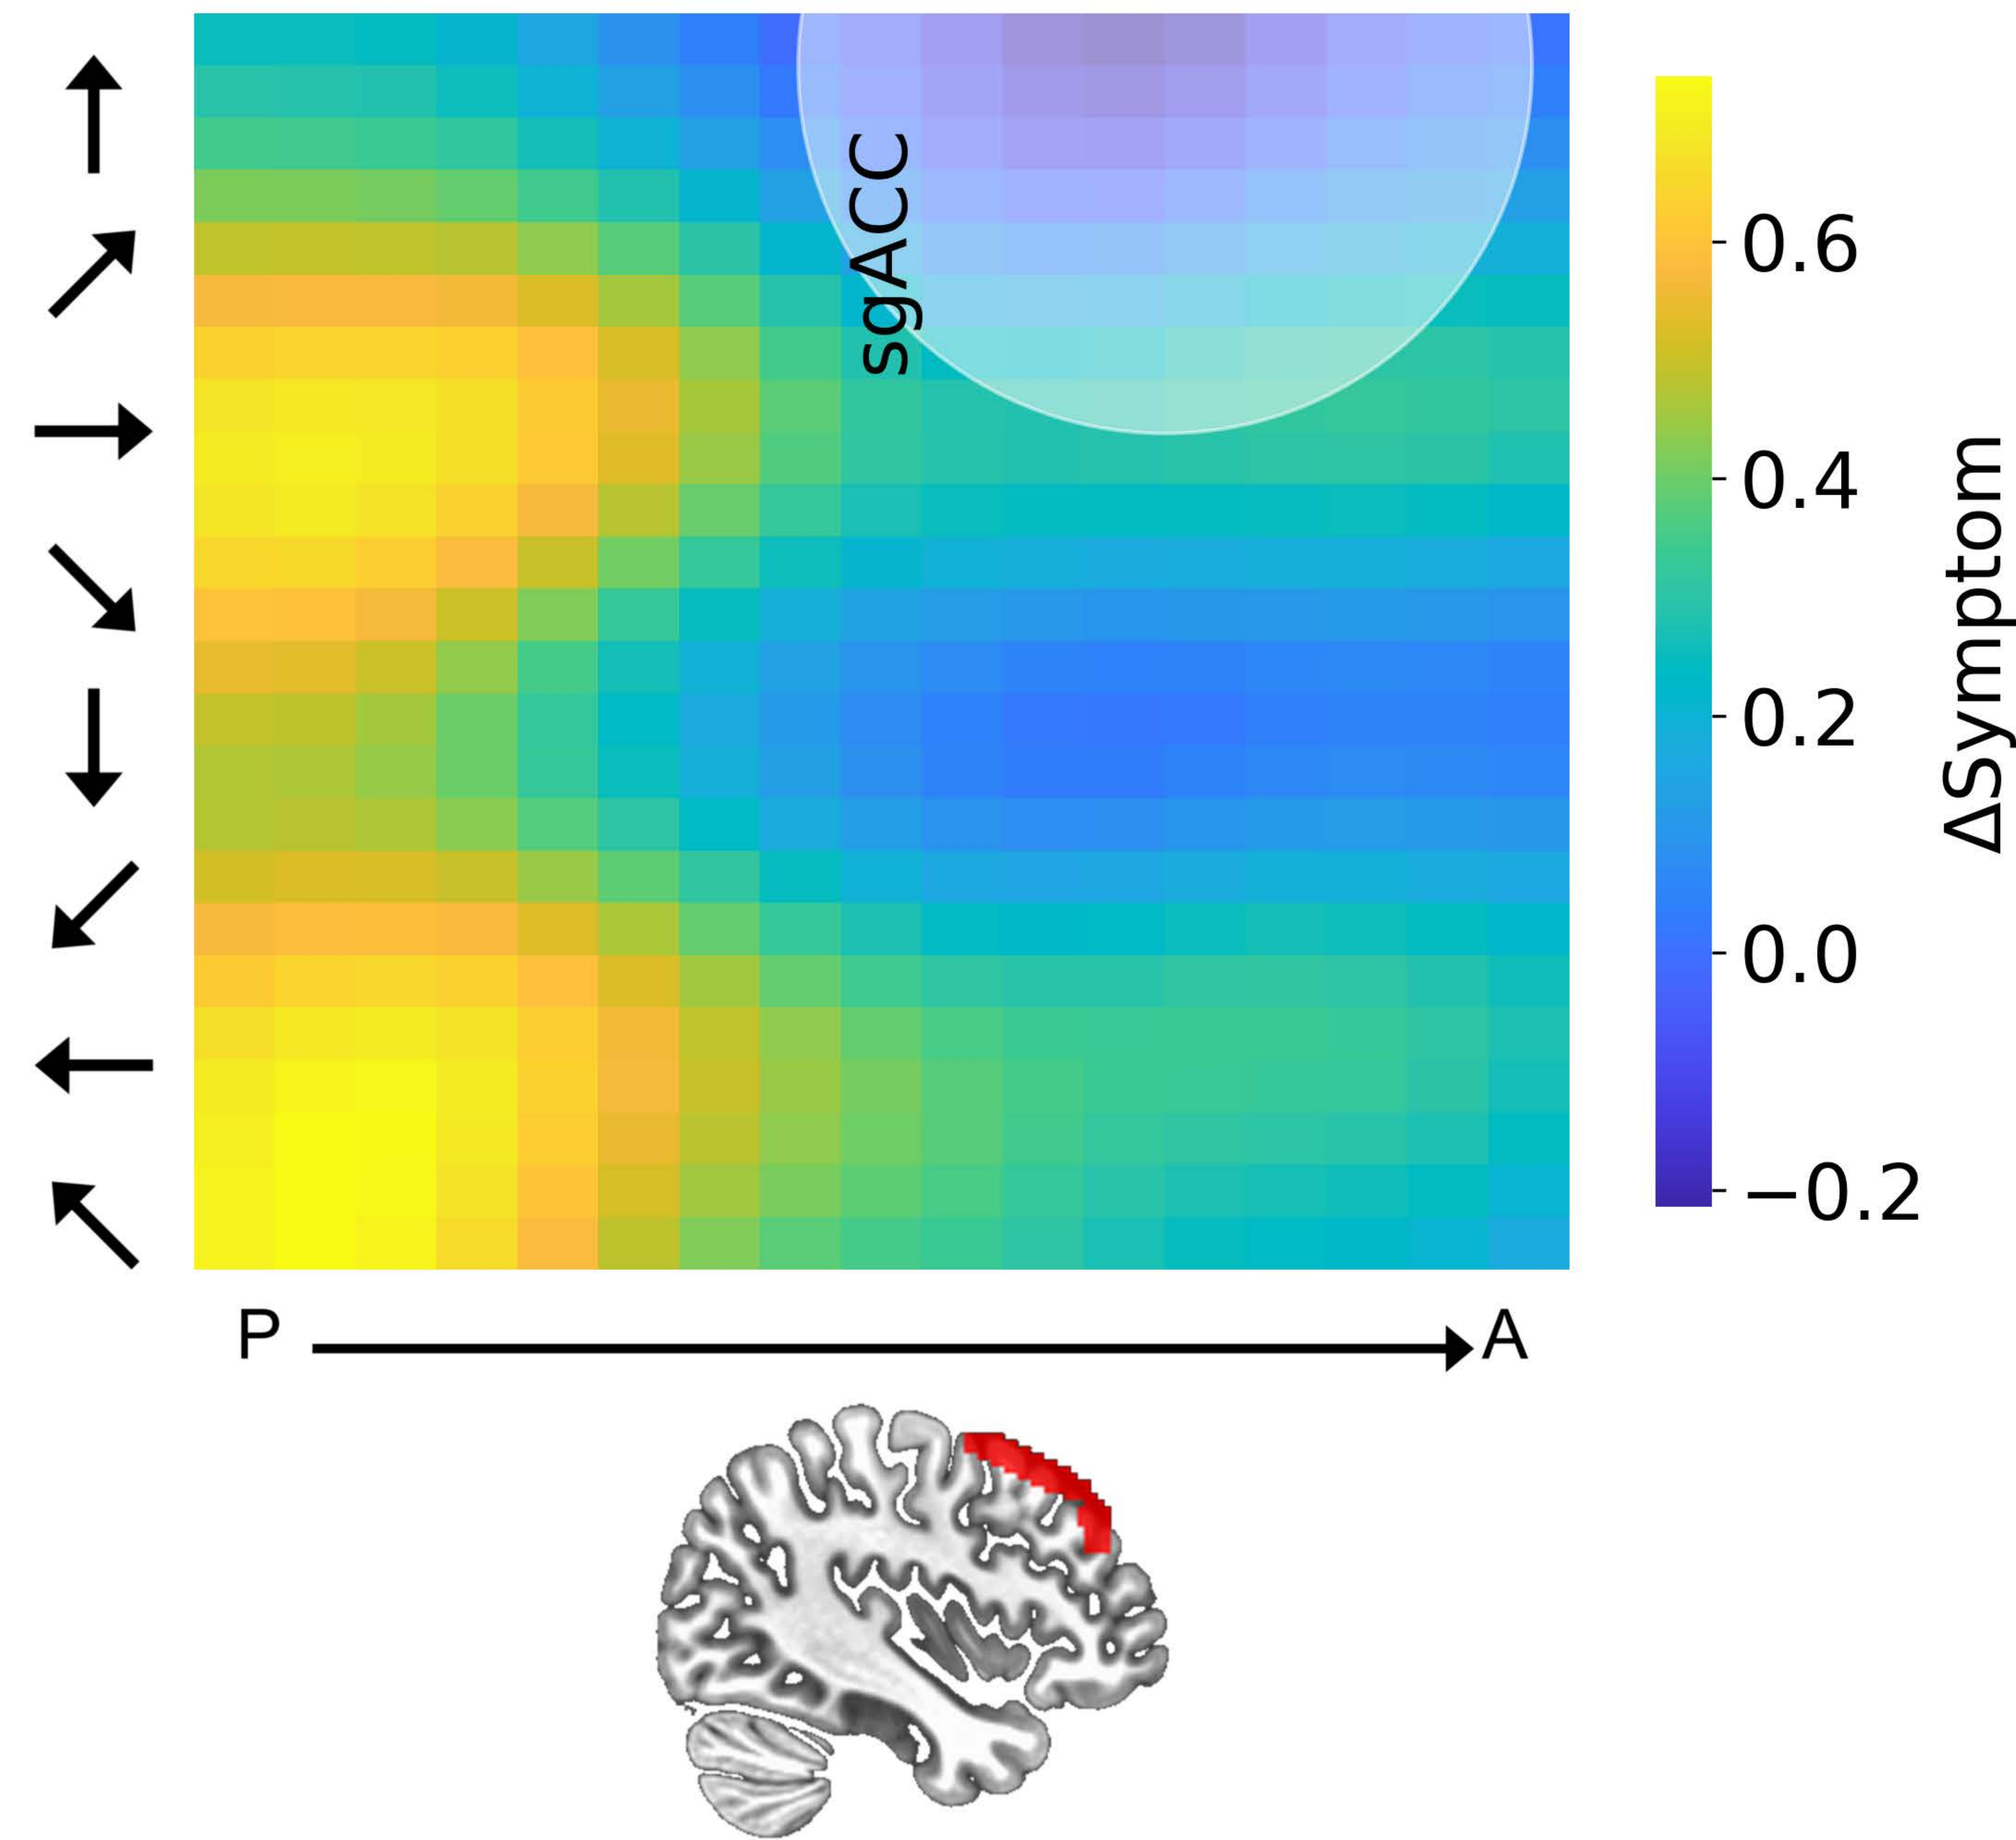



# INDARVE642FAN\_hamd\_left\_dlpfc

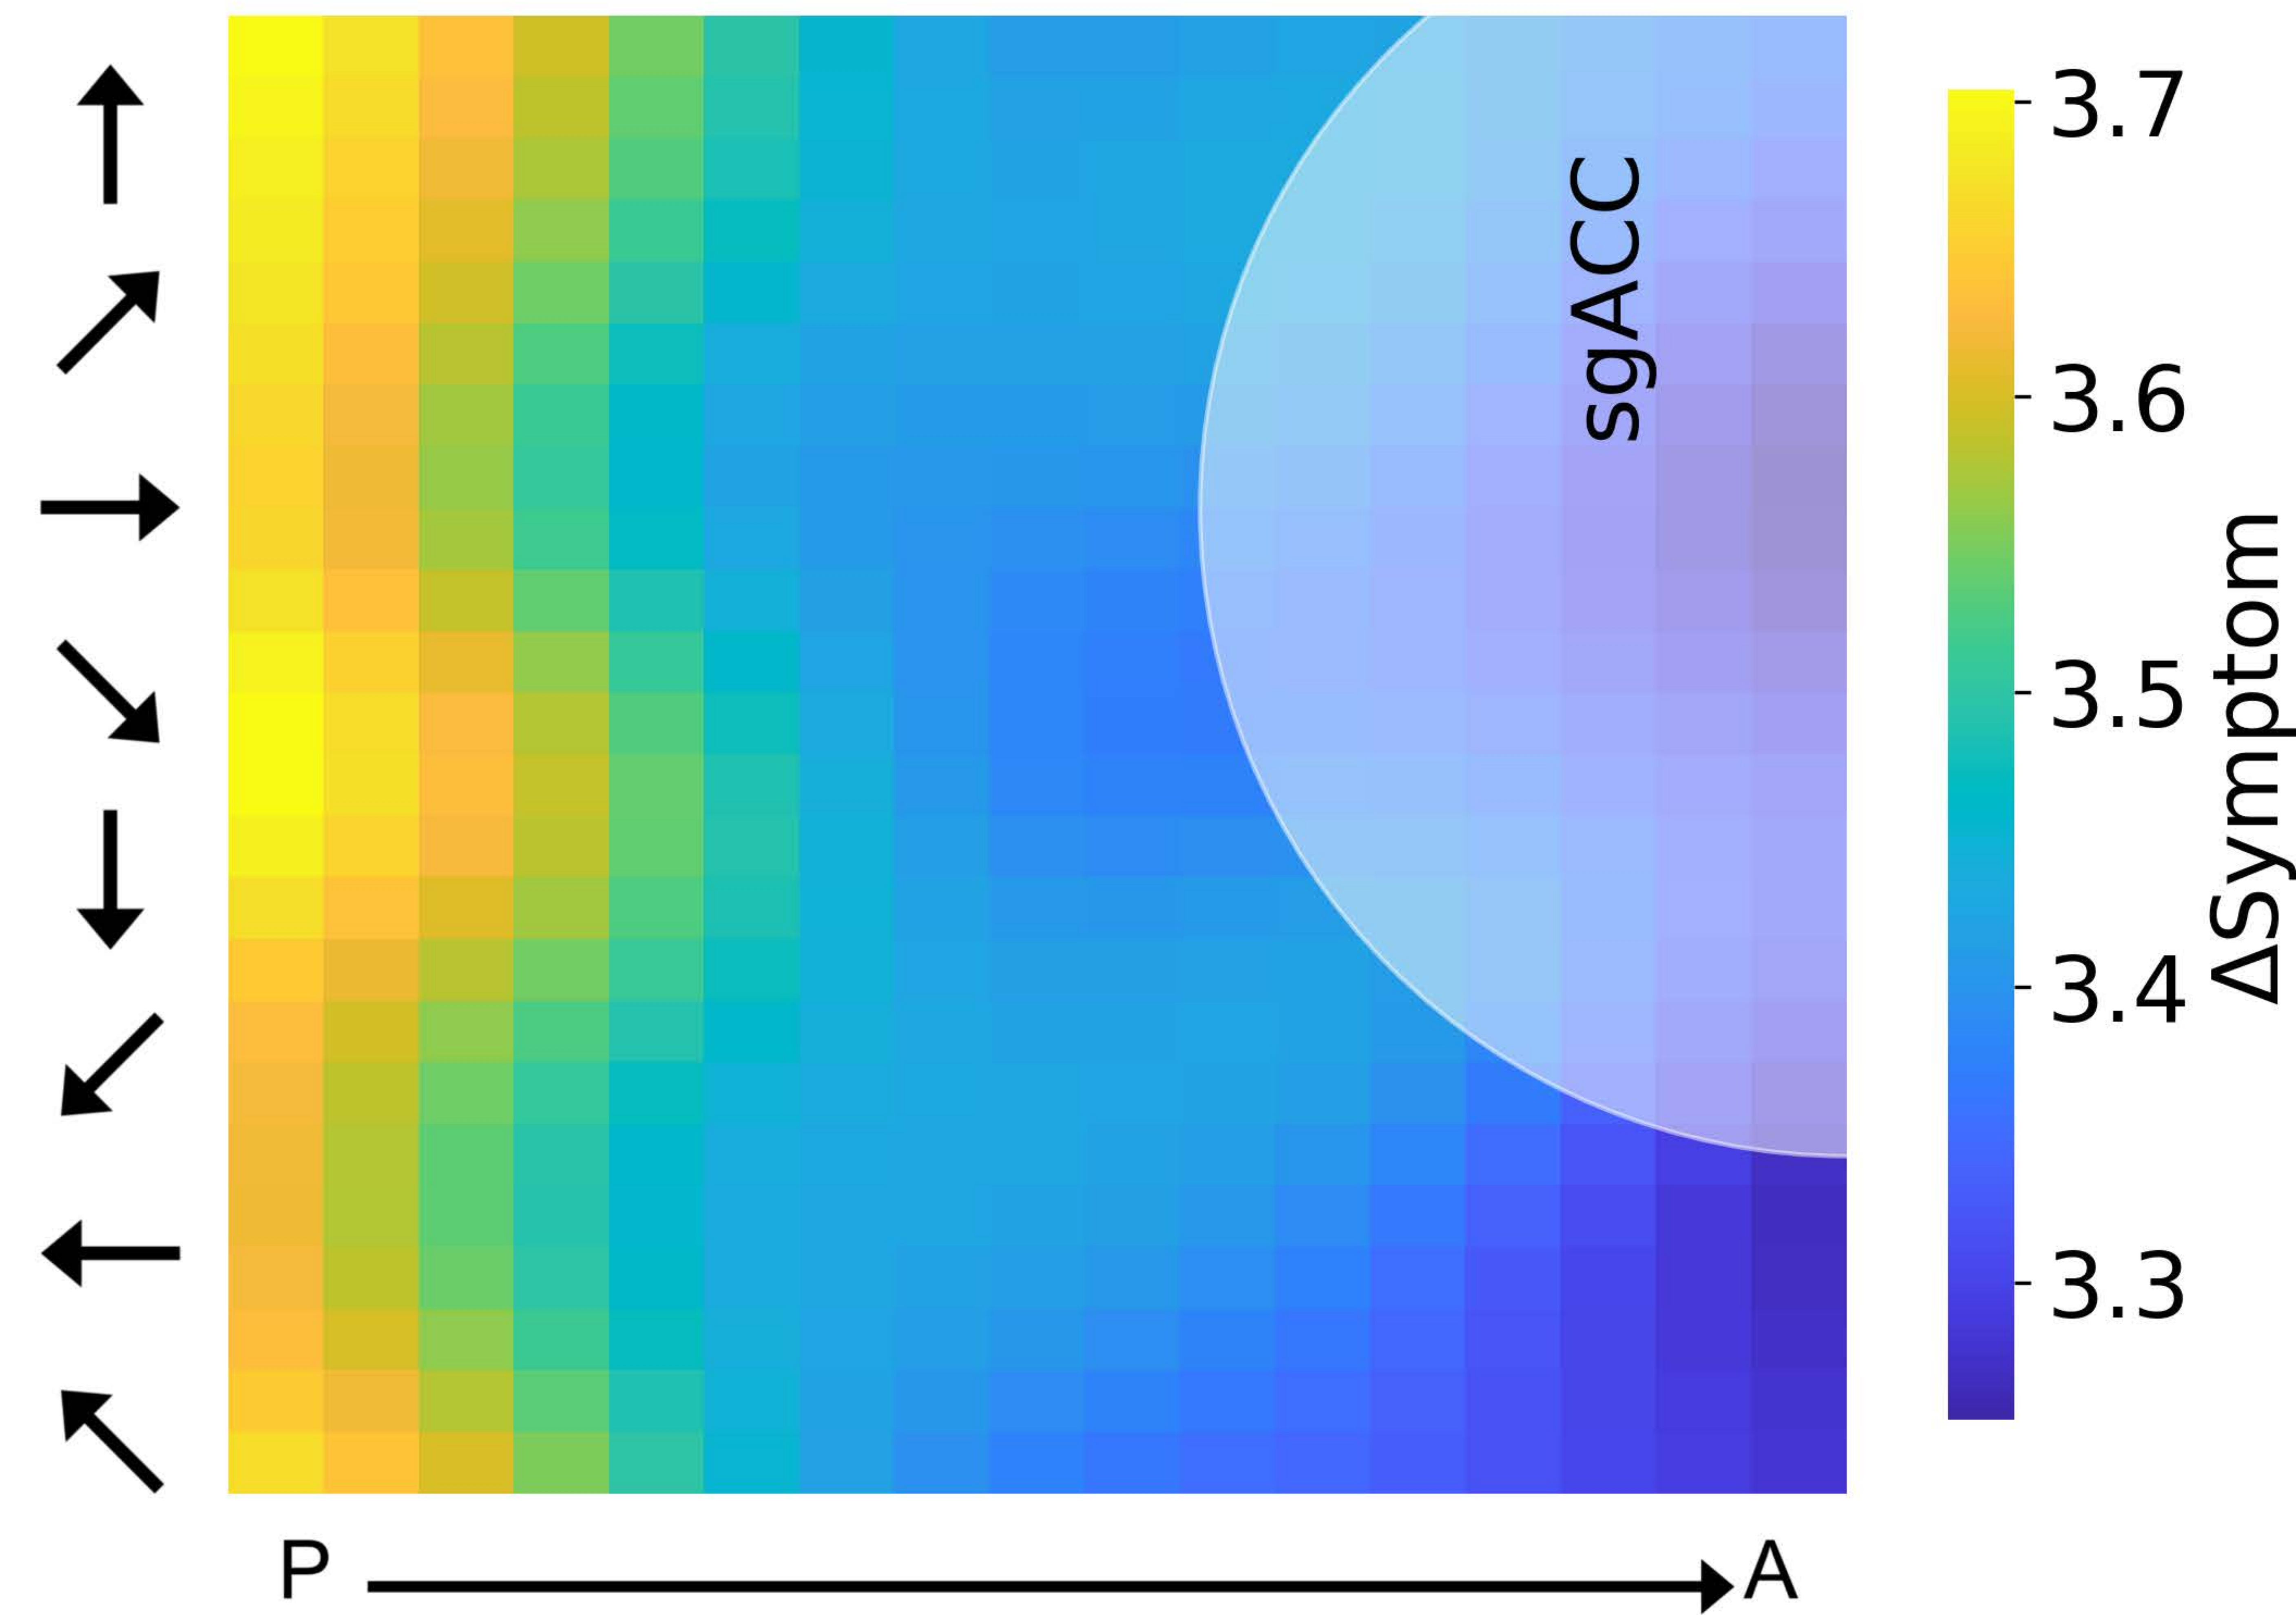



# NDARVL144YVF\_hamd\_left\_dlpfc

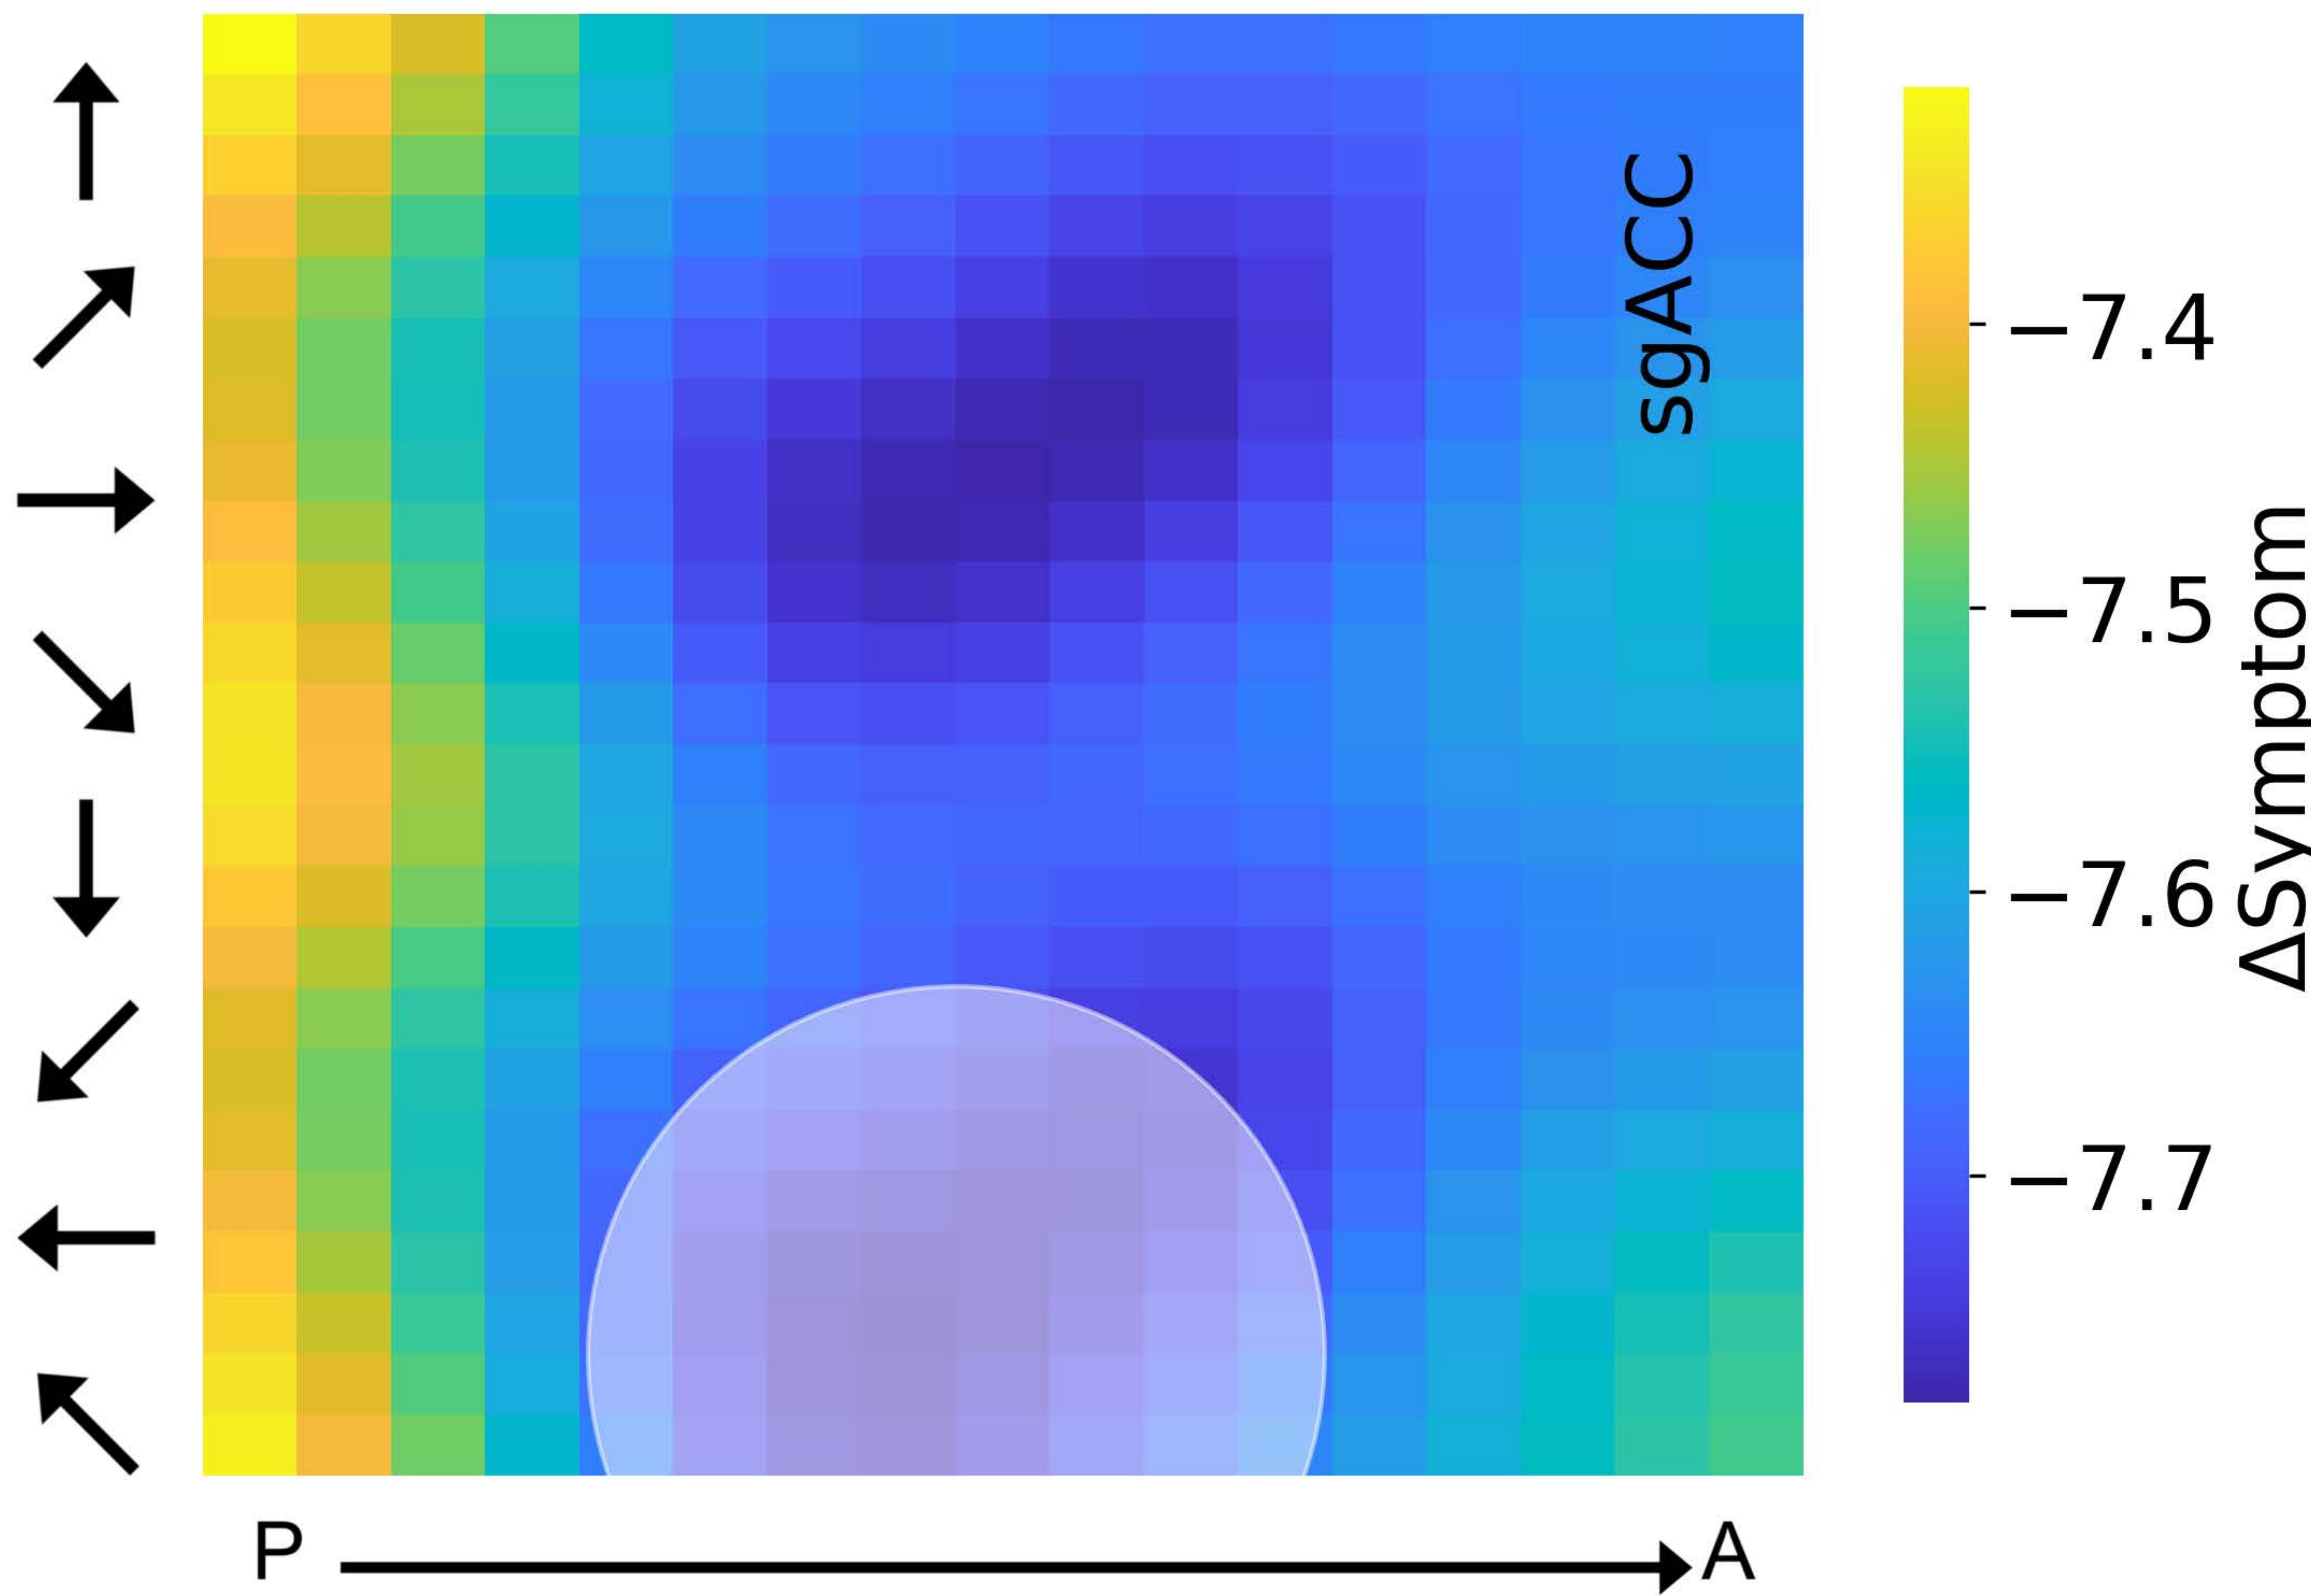



# NDARWH523DTV\_hamd\_left\_dlpfc

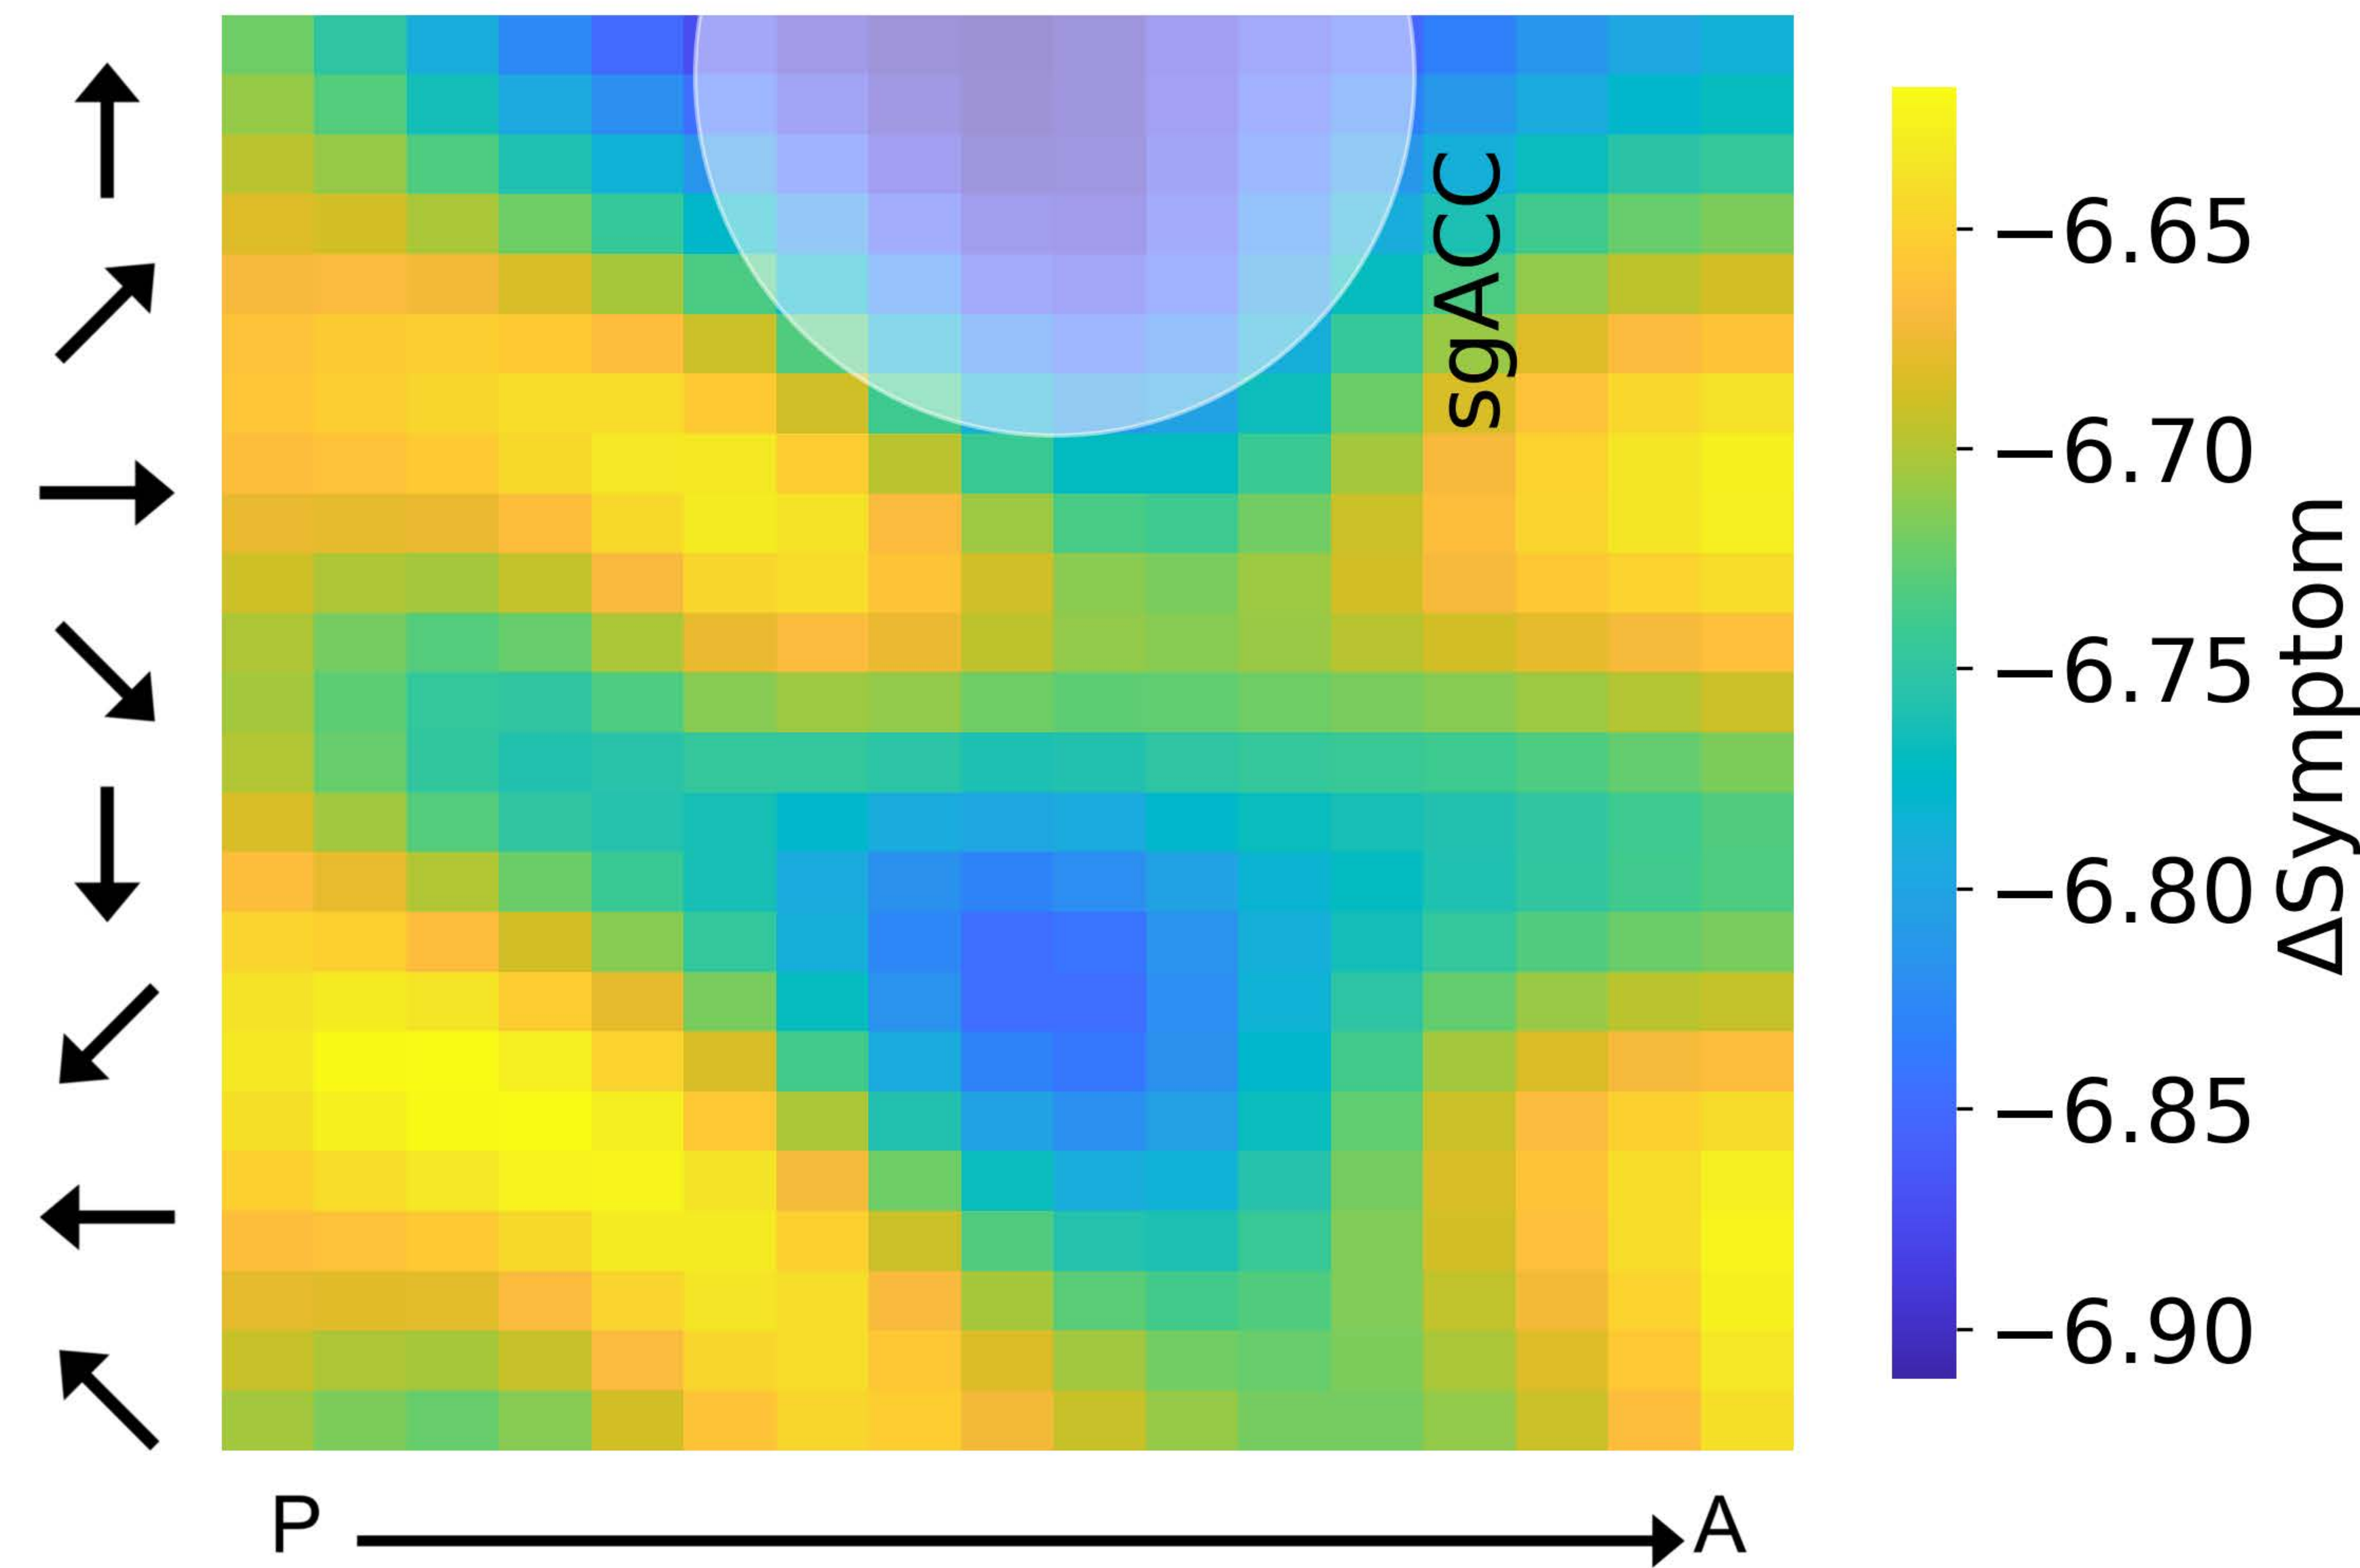



# NDARWJ818VXA\_hamd\_left\_dlpfc

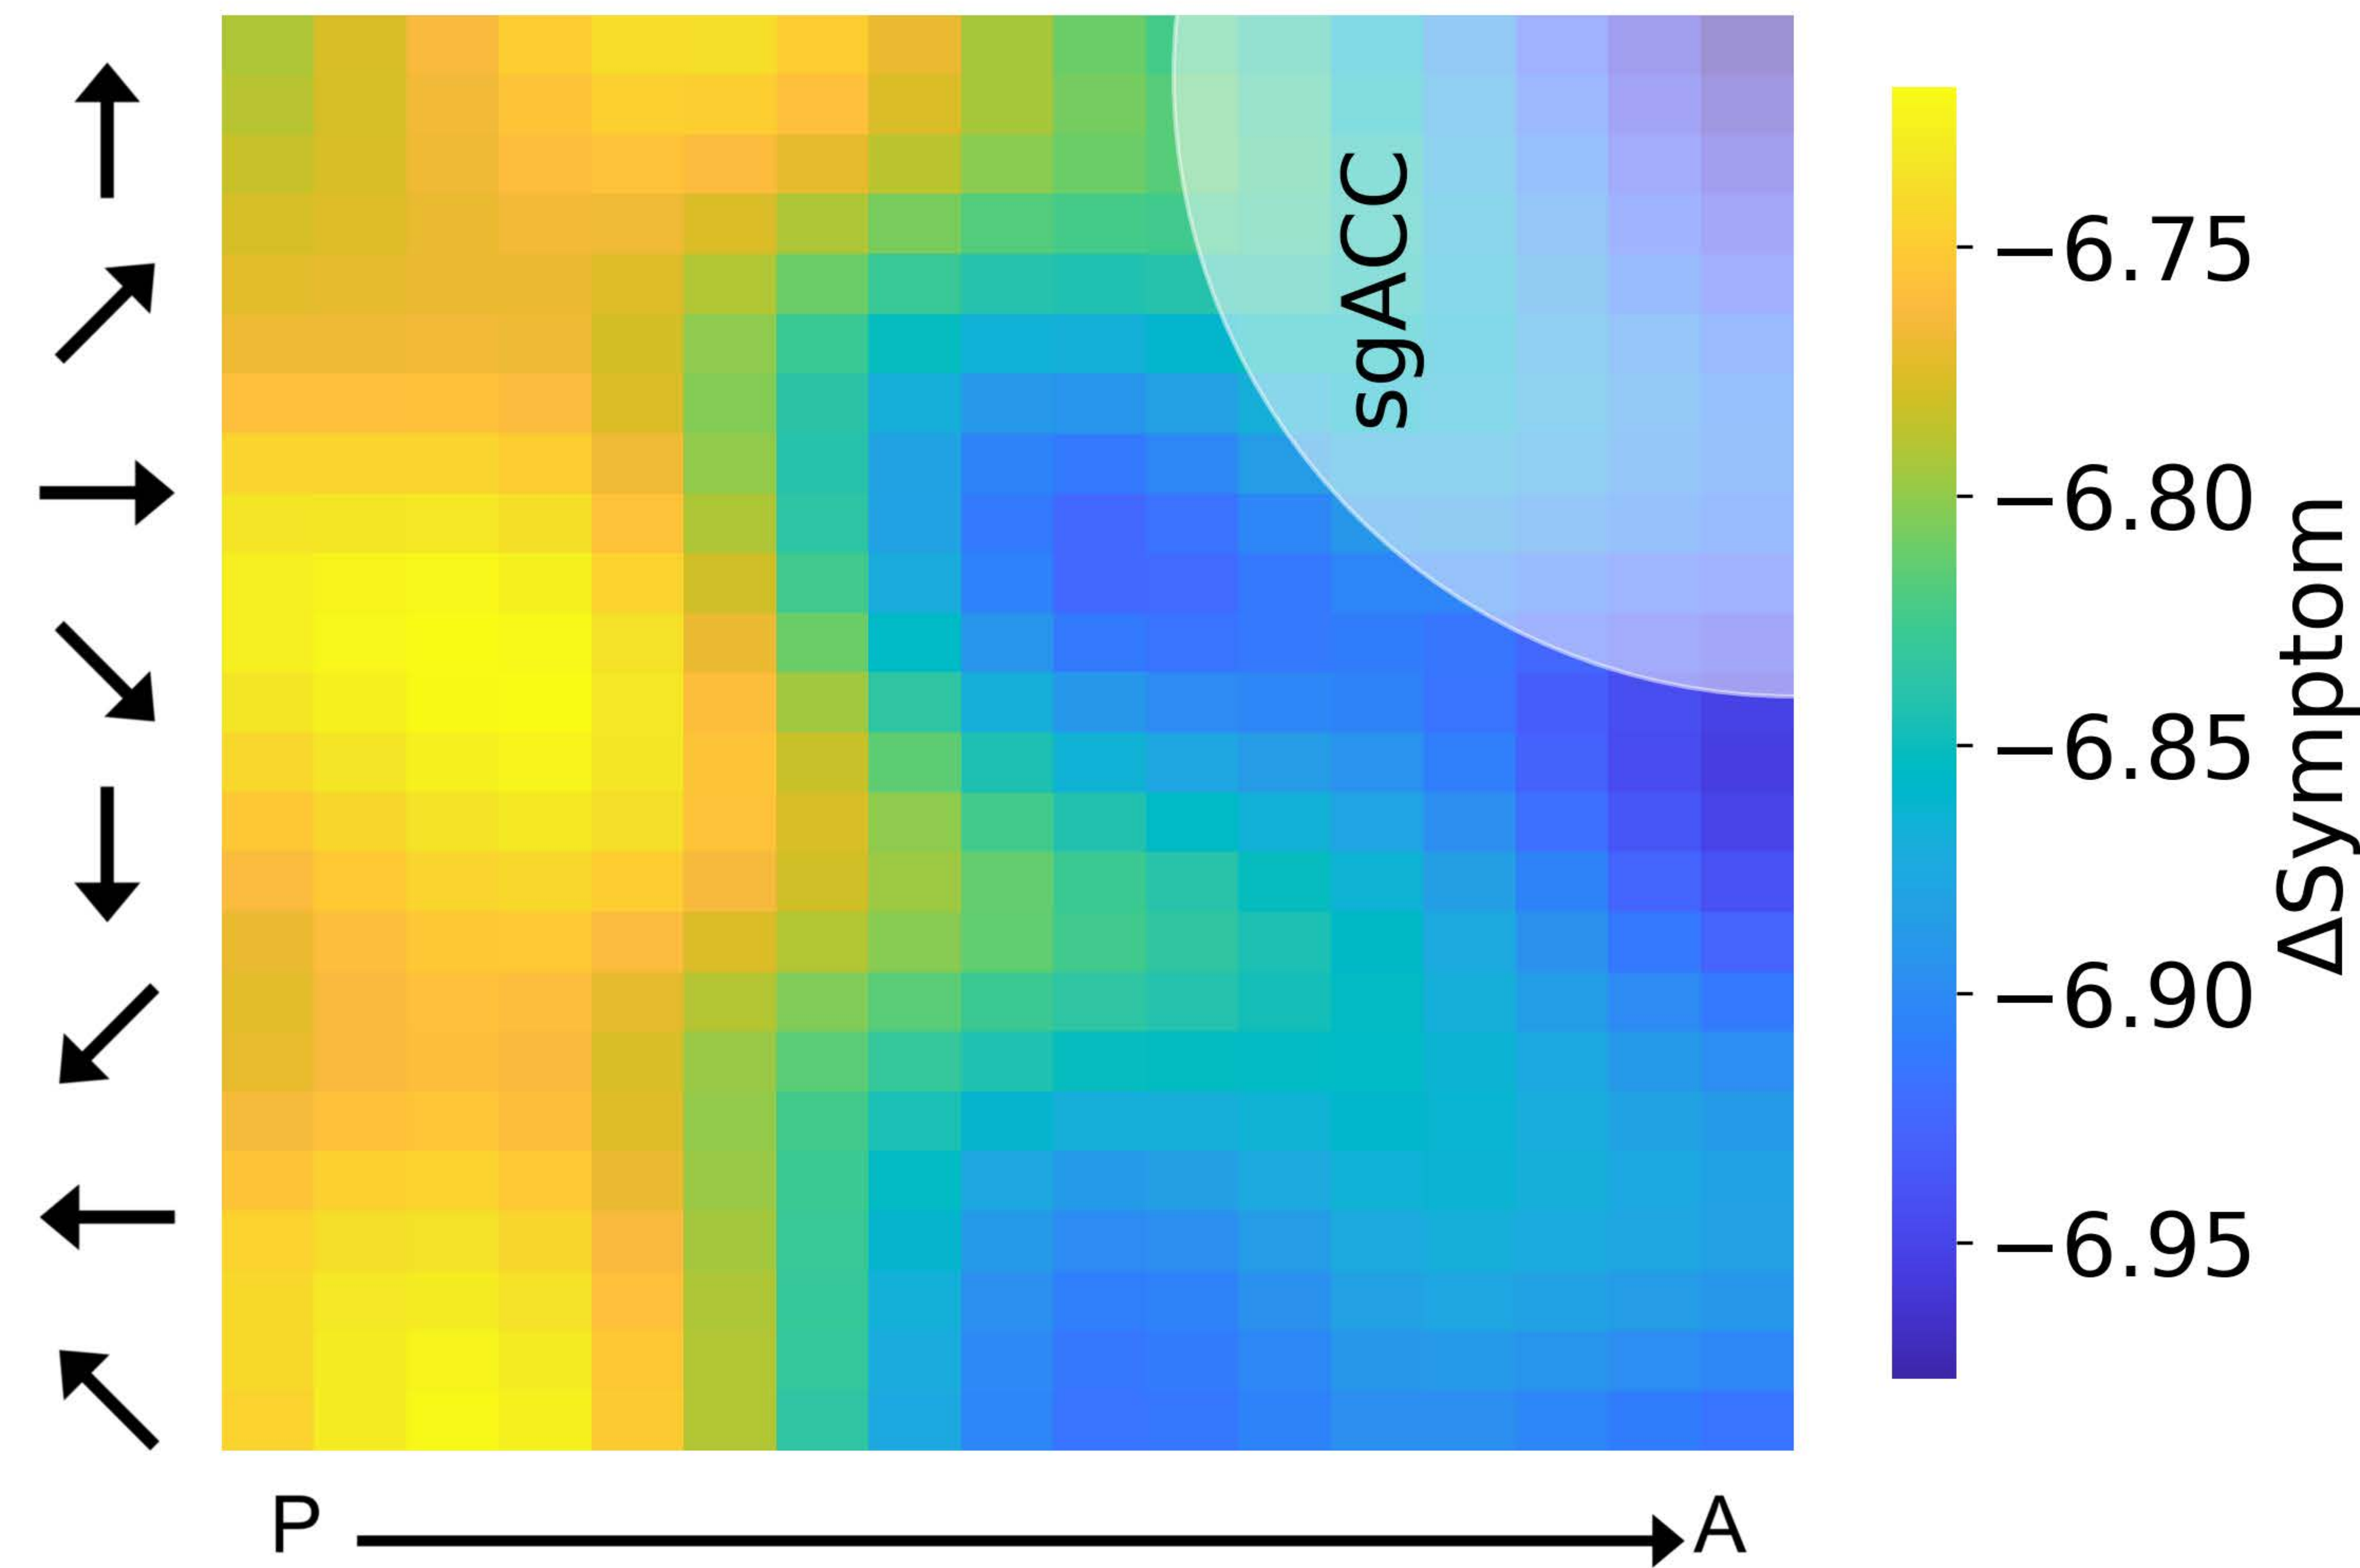



# INDARWK081NTV\_hamd\_left\_dlpfc

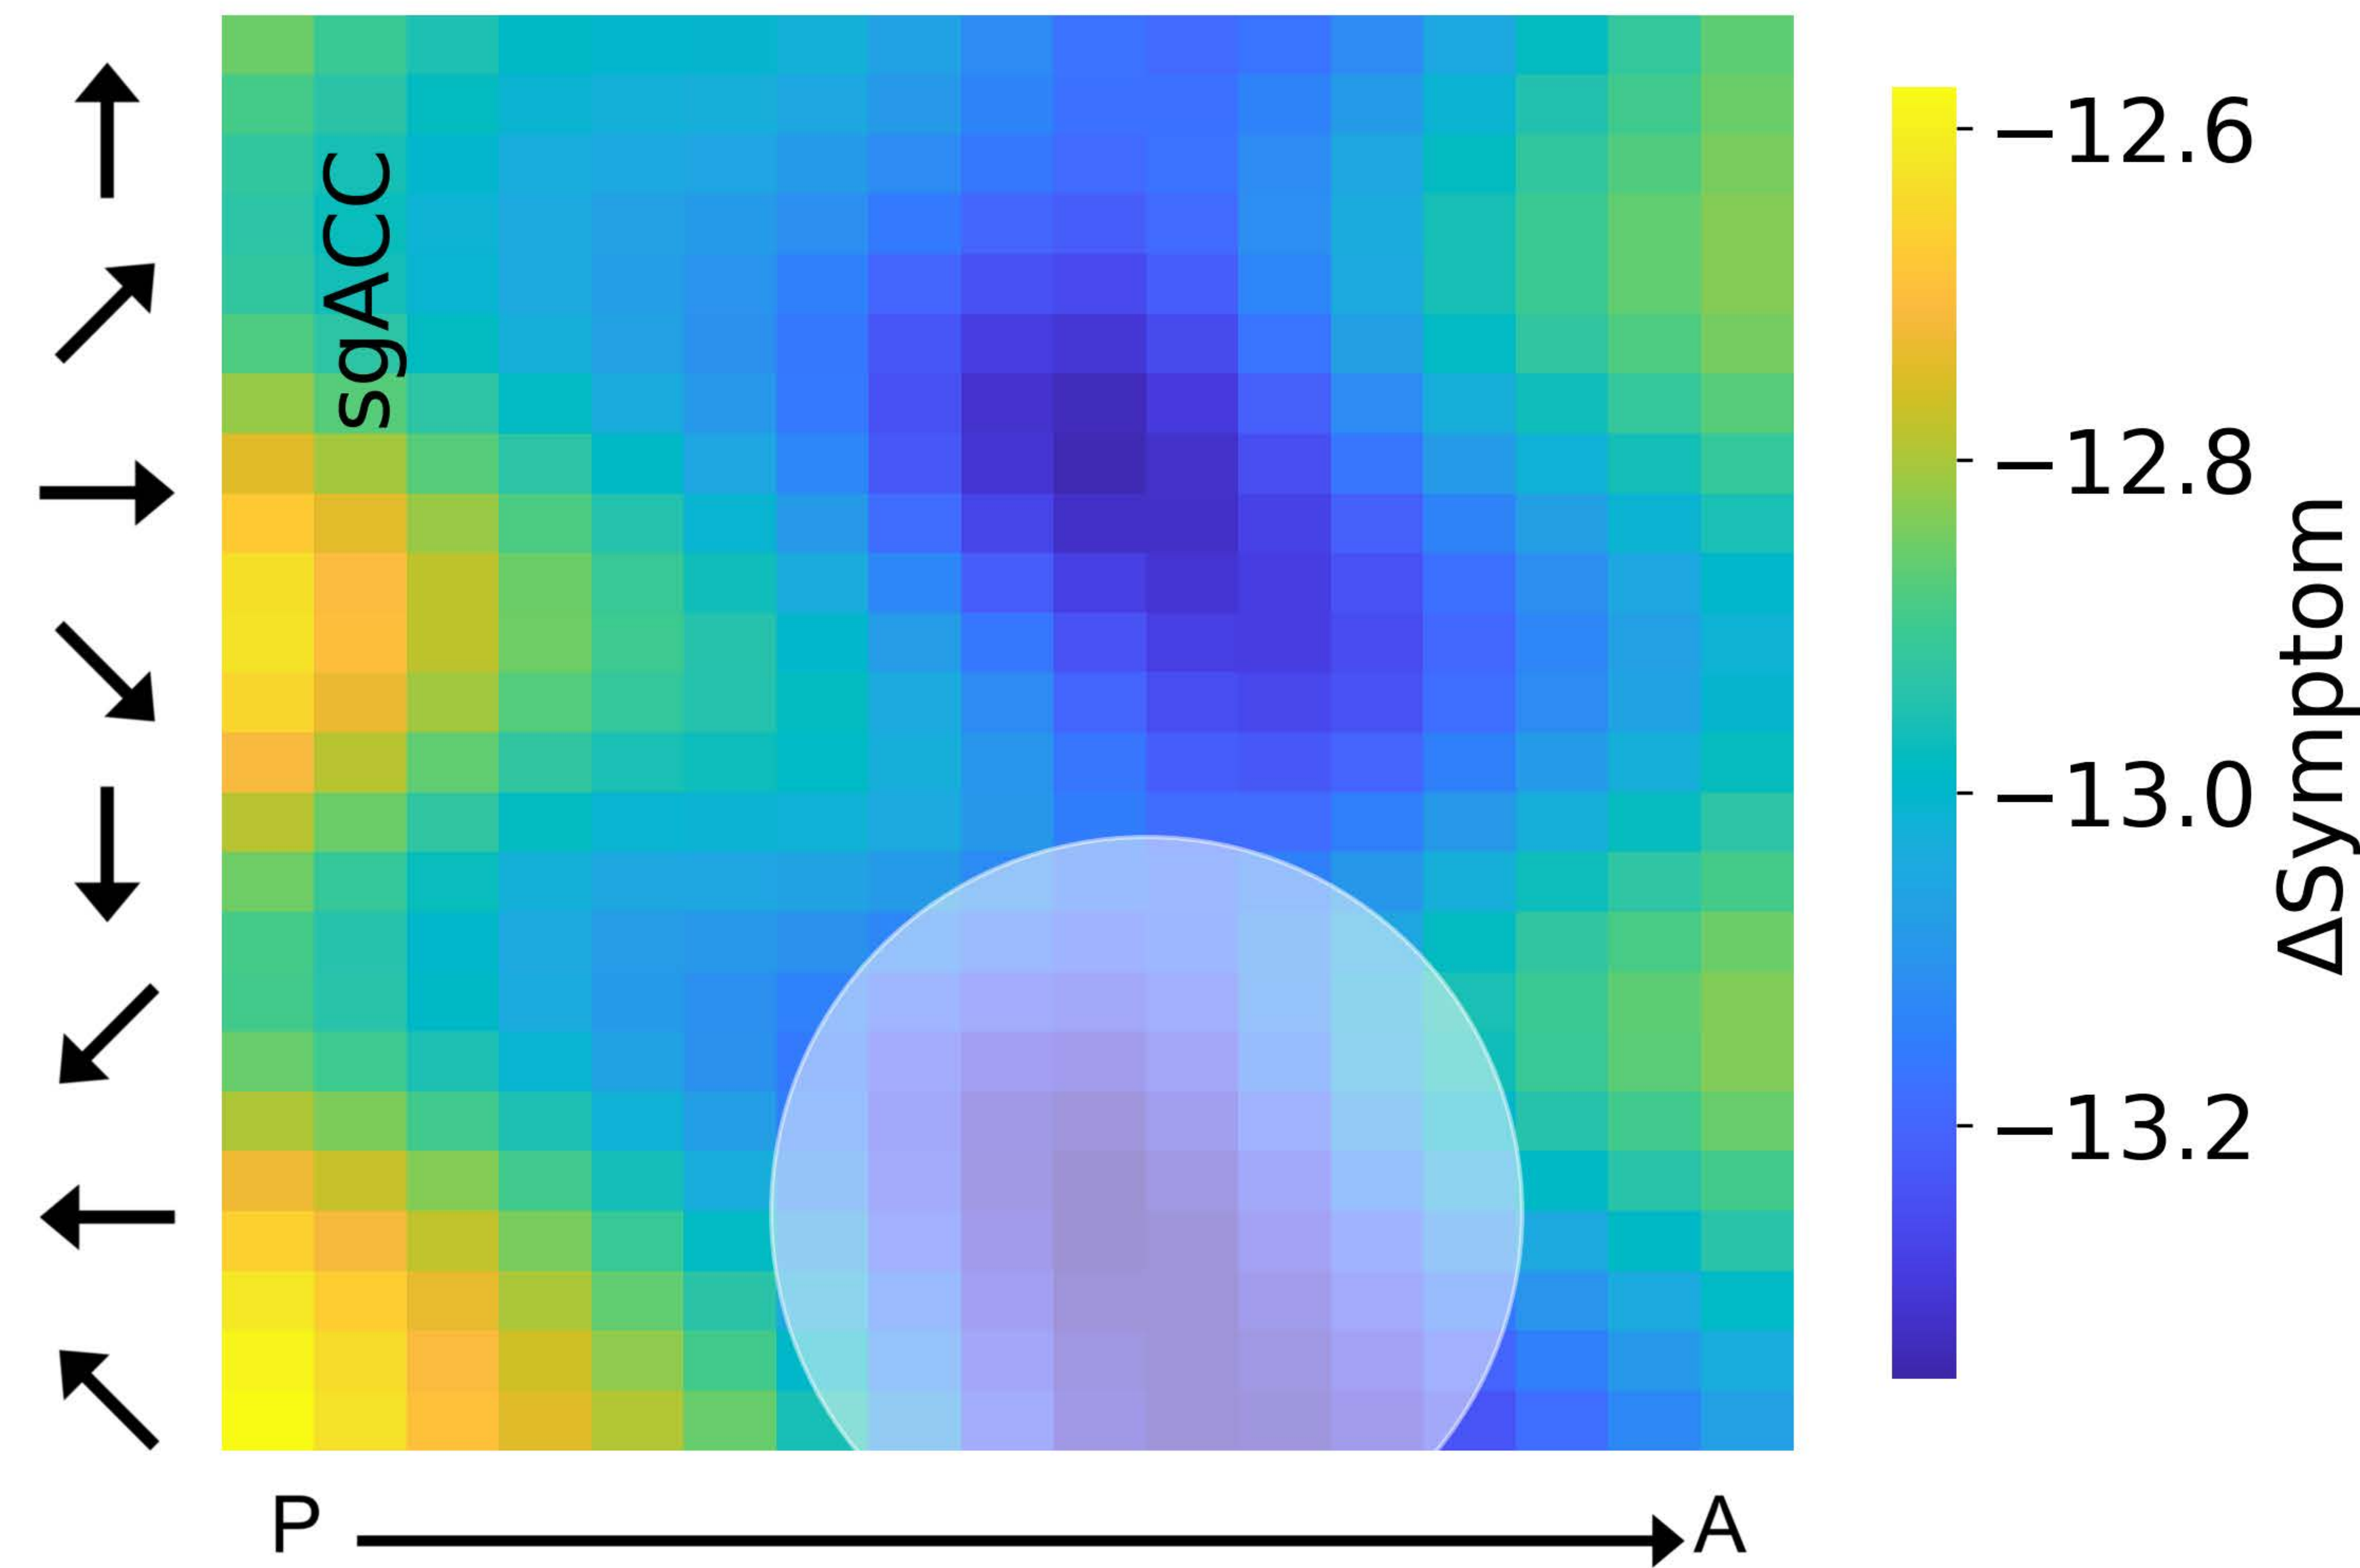



# INDARWL277NXF\_hamd\_left\_dlpfc

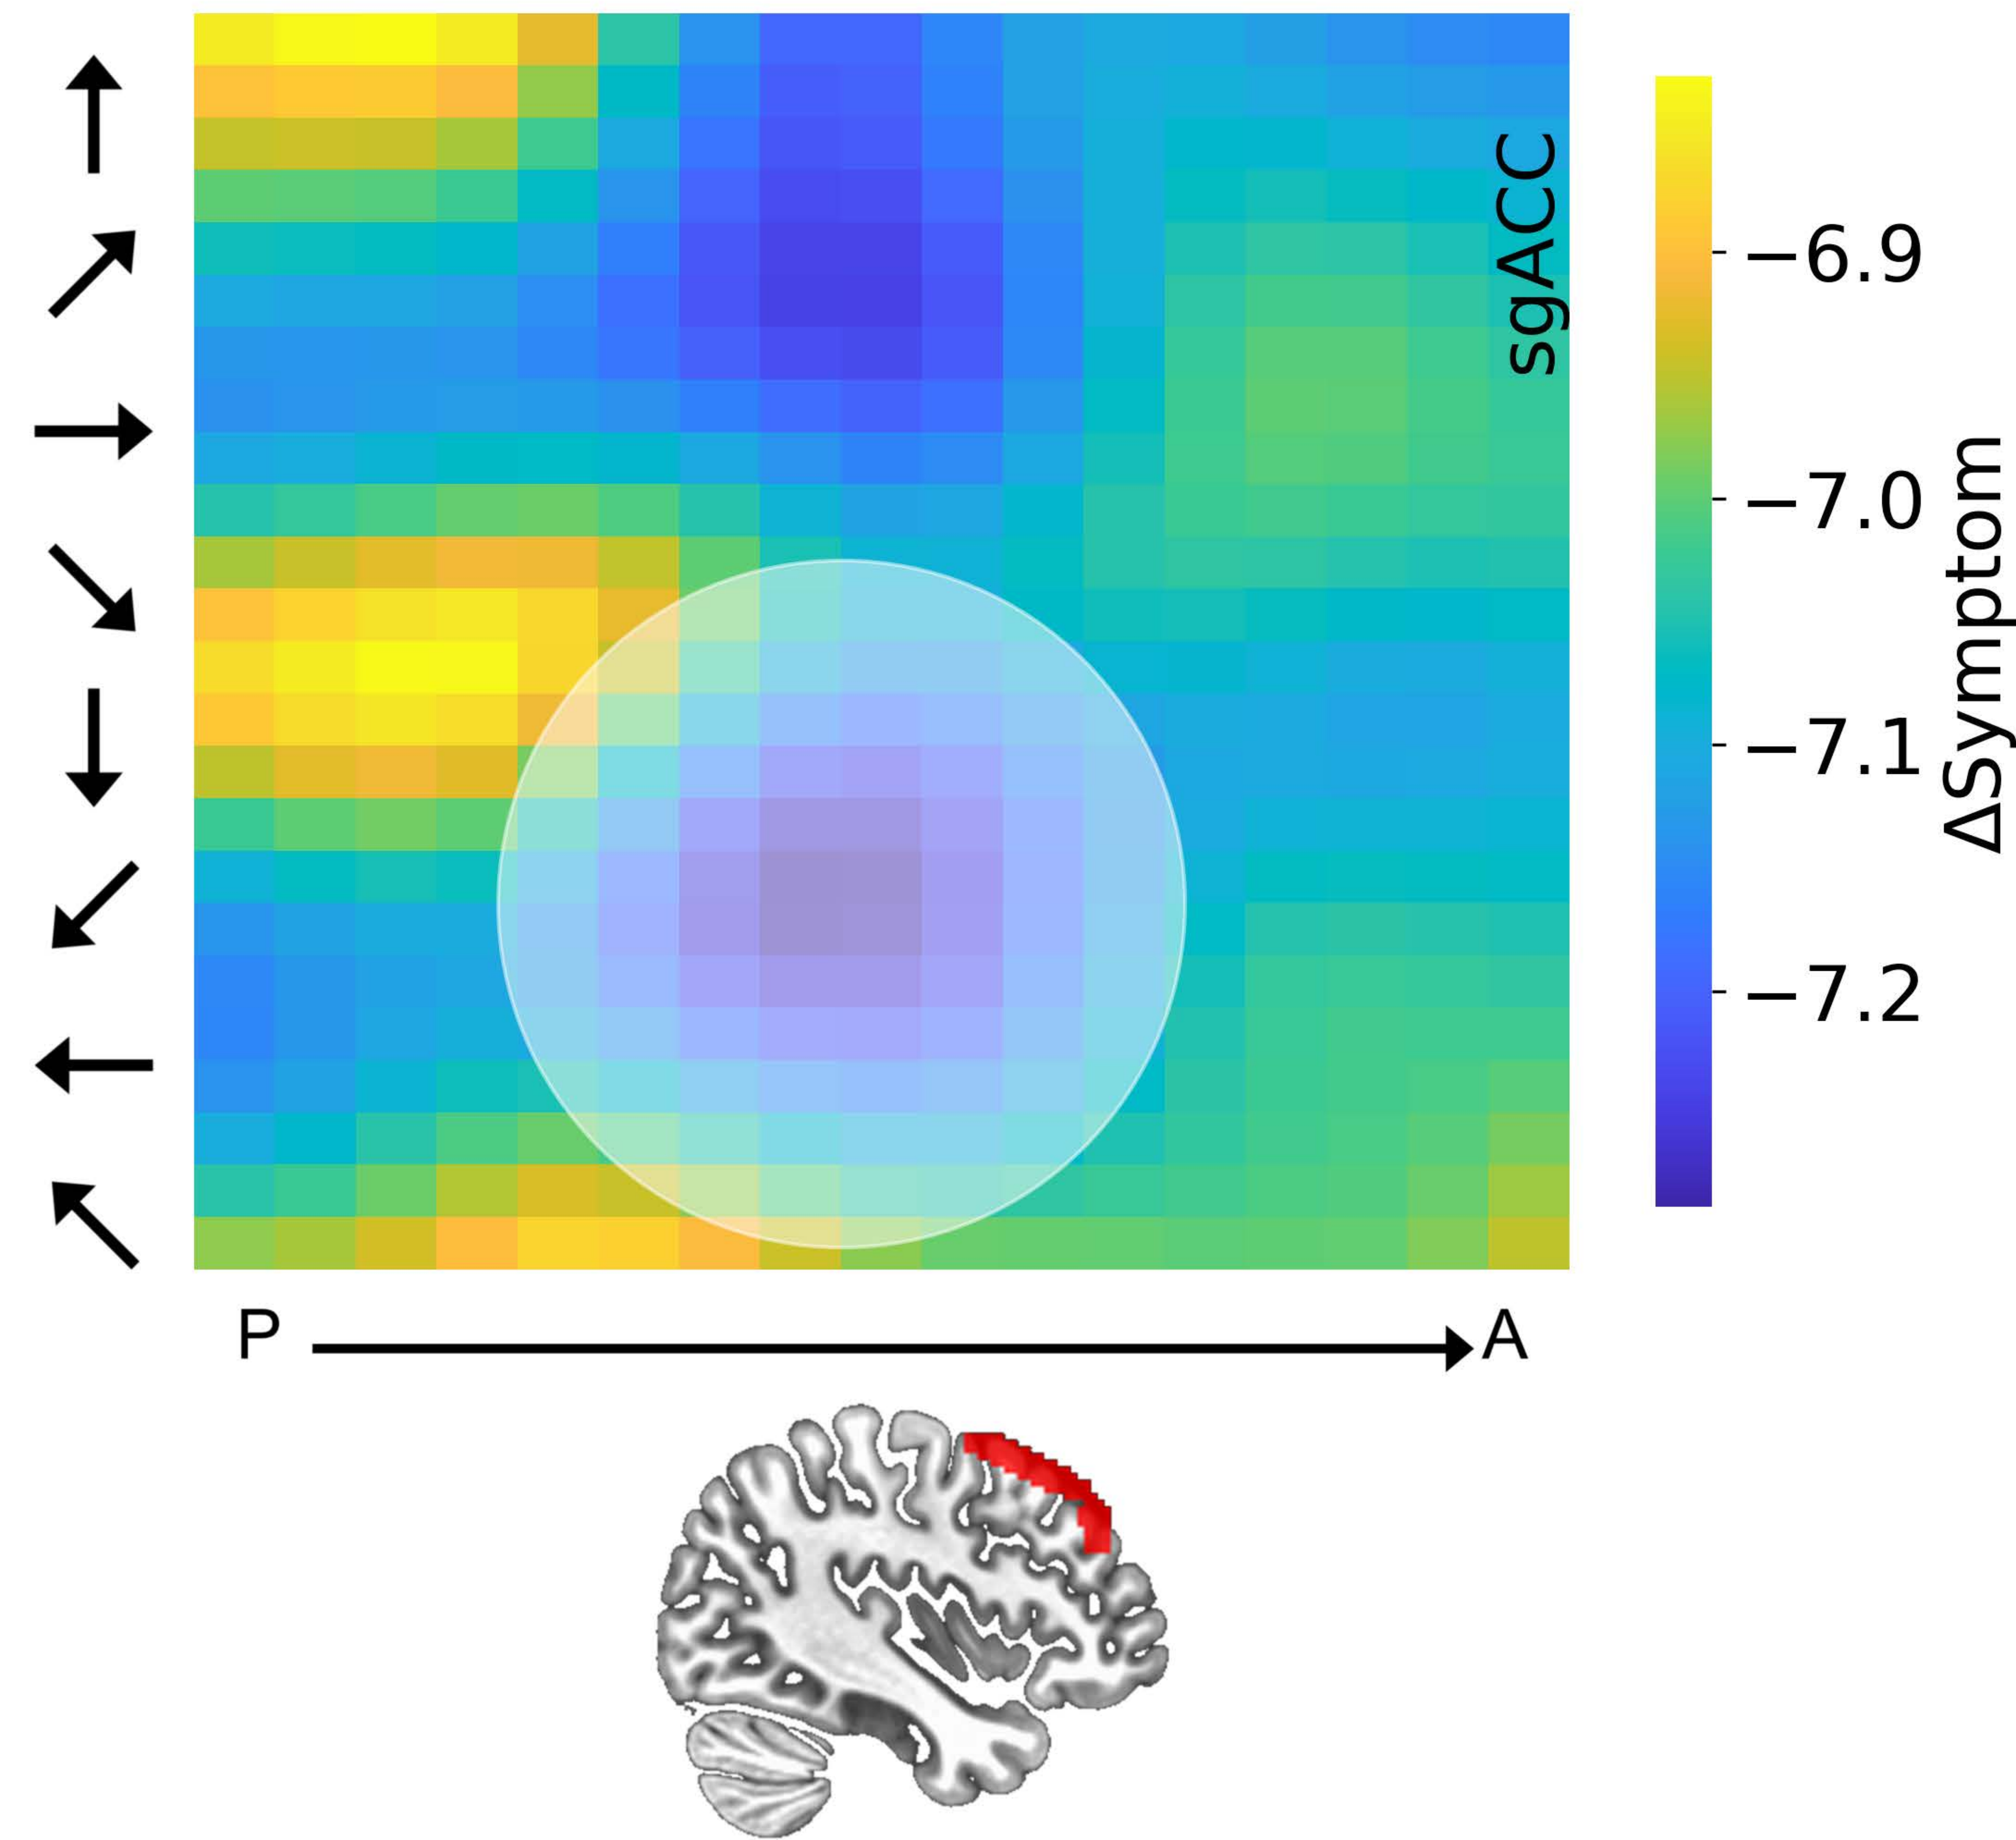



# INDARWV016ZAT\_hamd\_left\_dlpfc

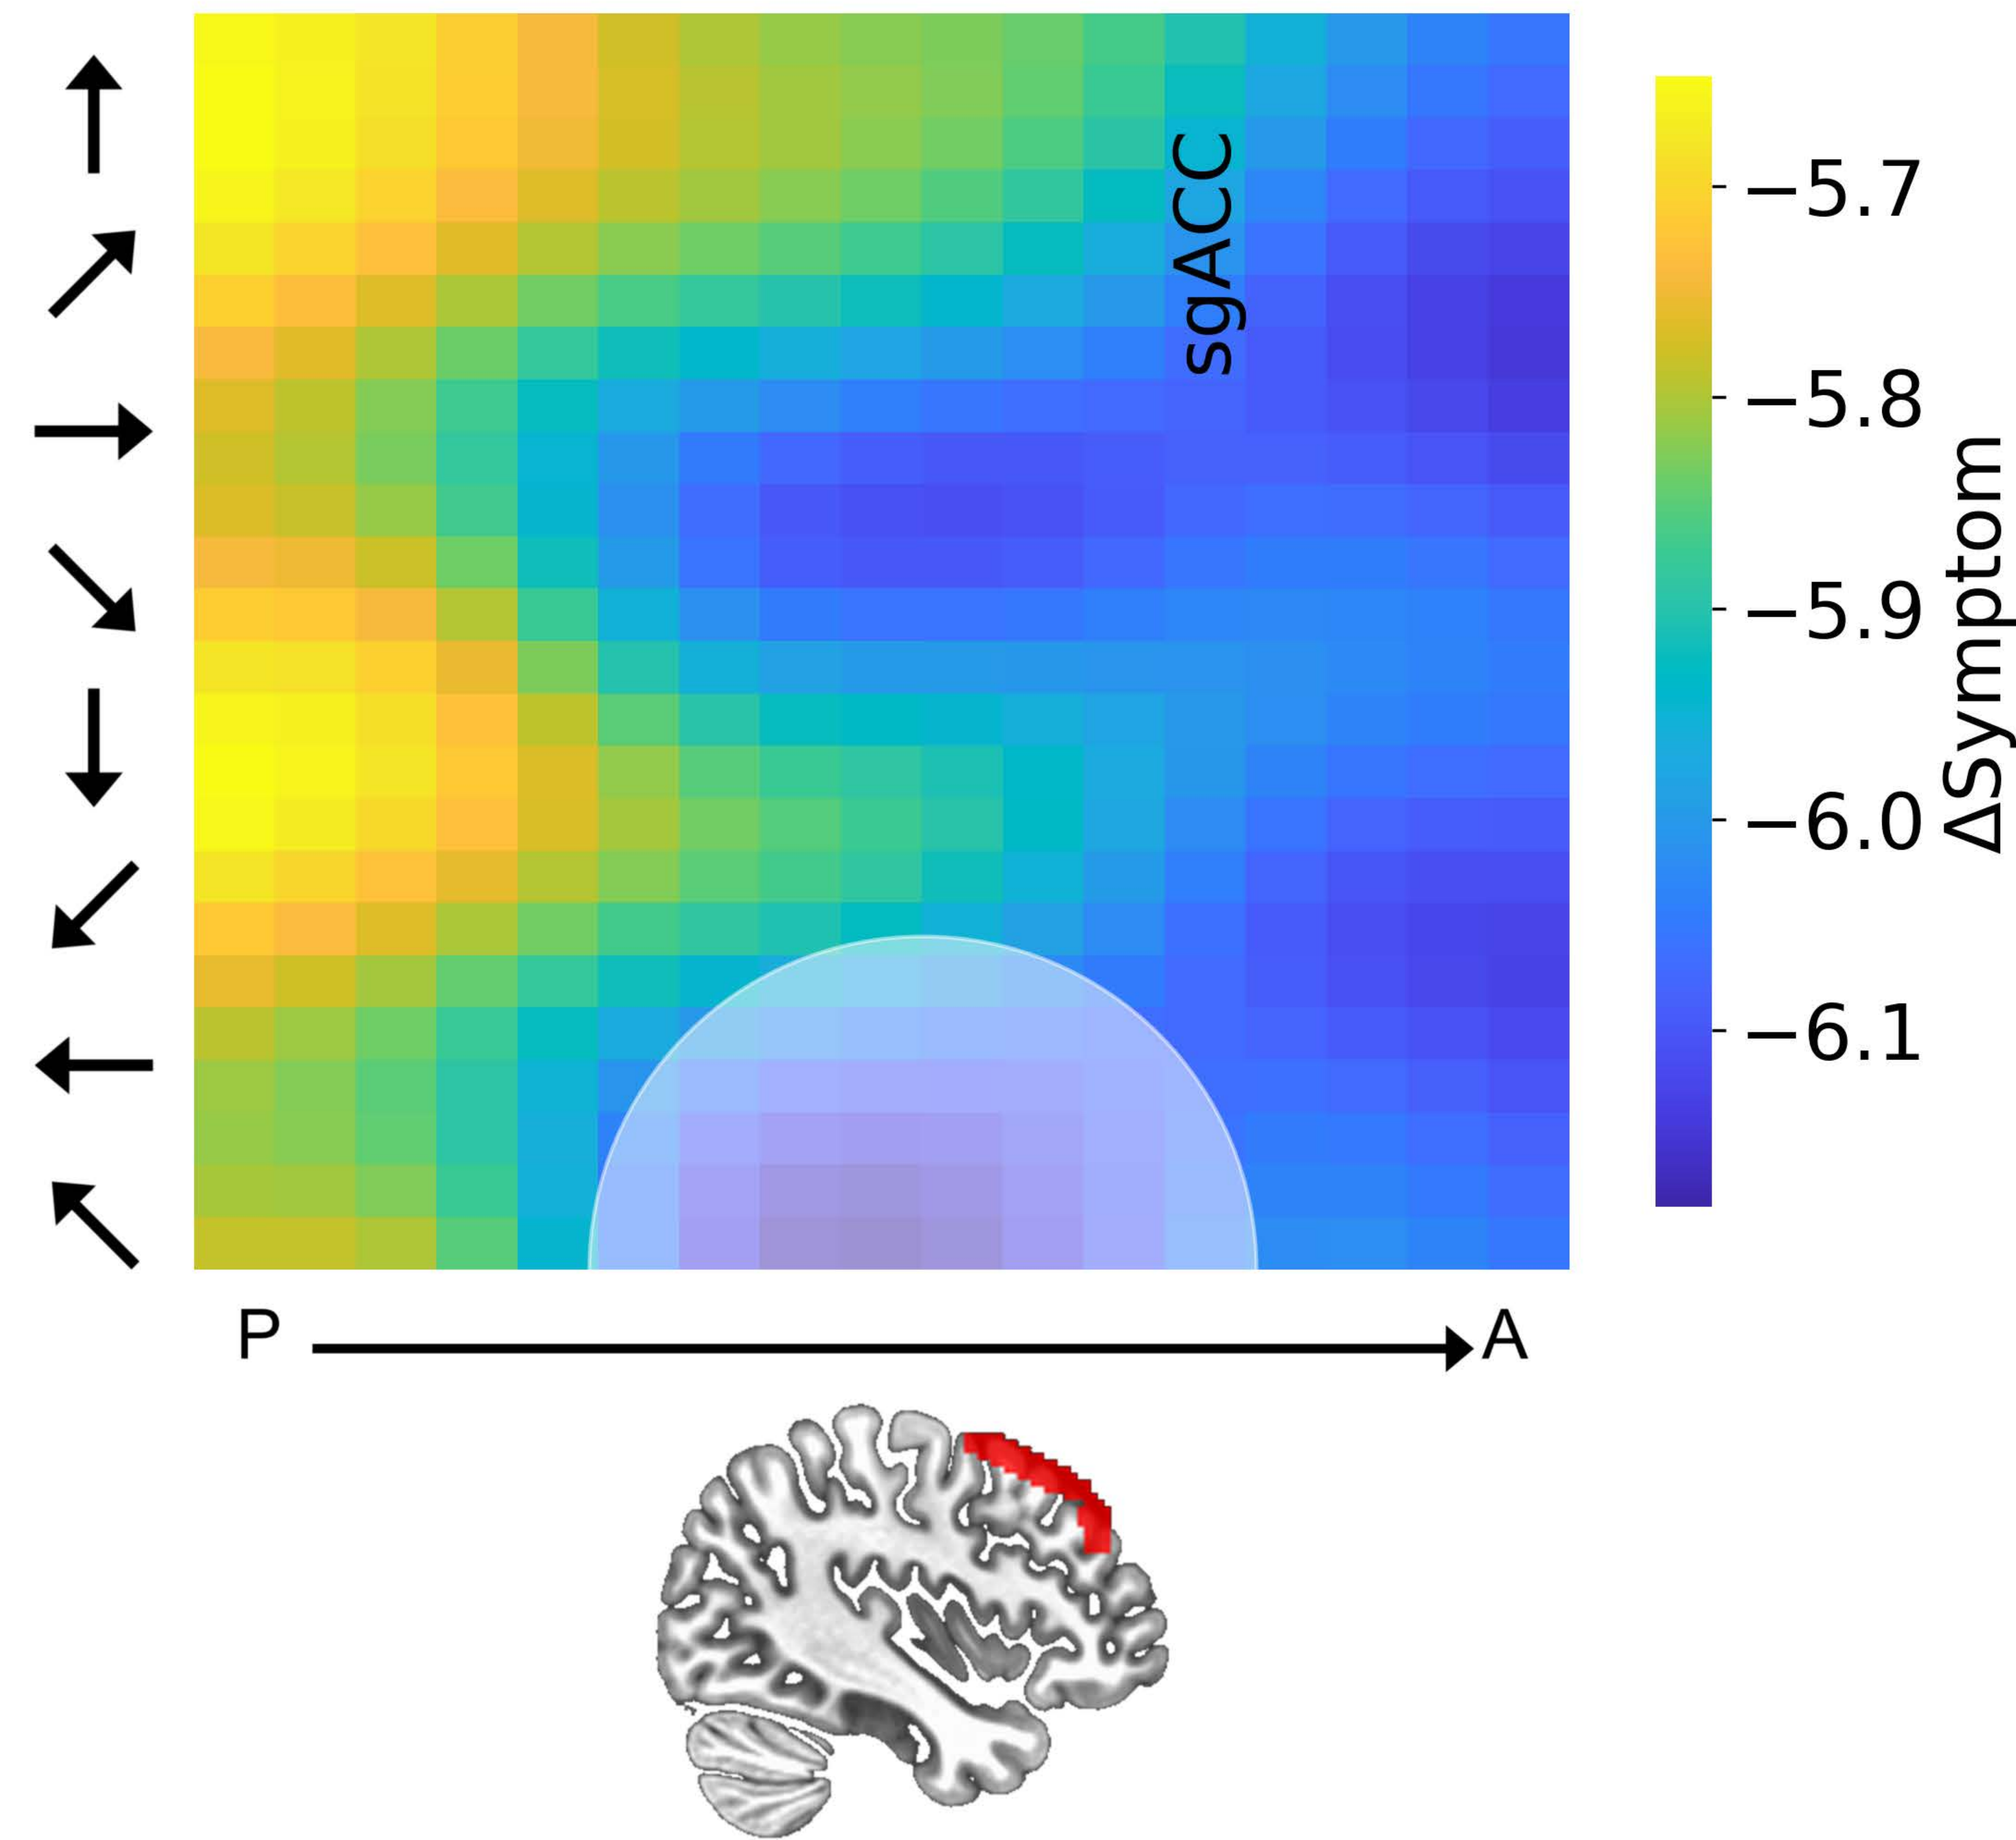



# NDARXA148KPL\_hamd\_left\_dlpfc

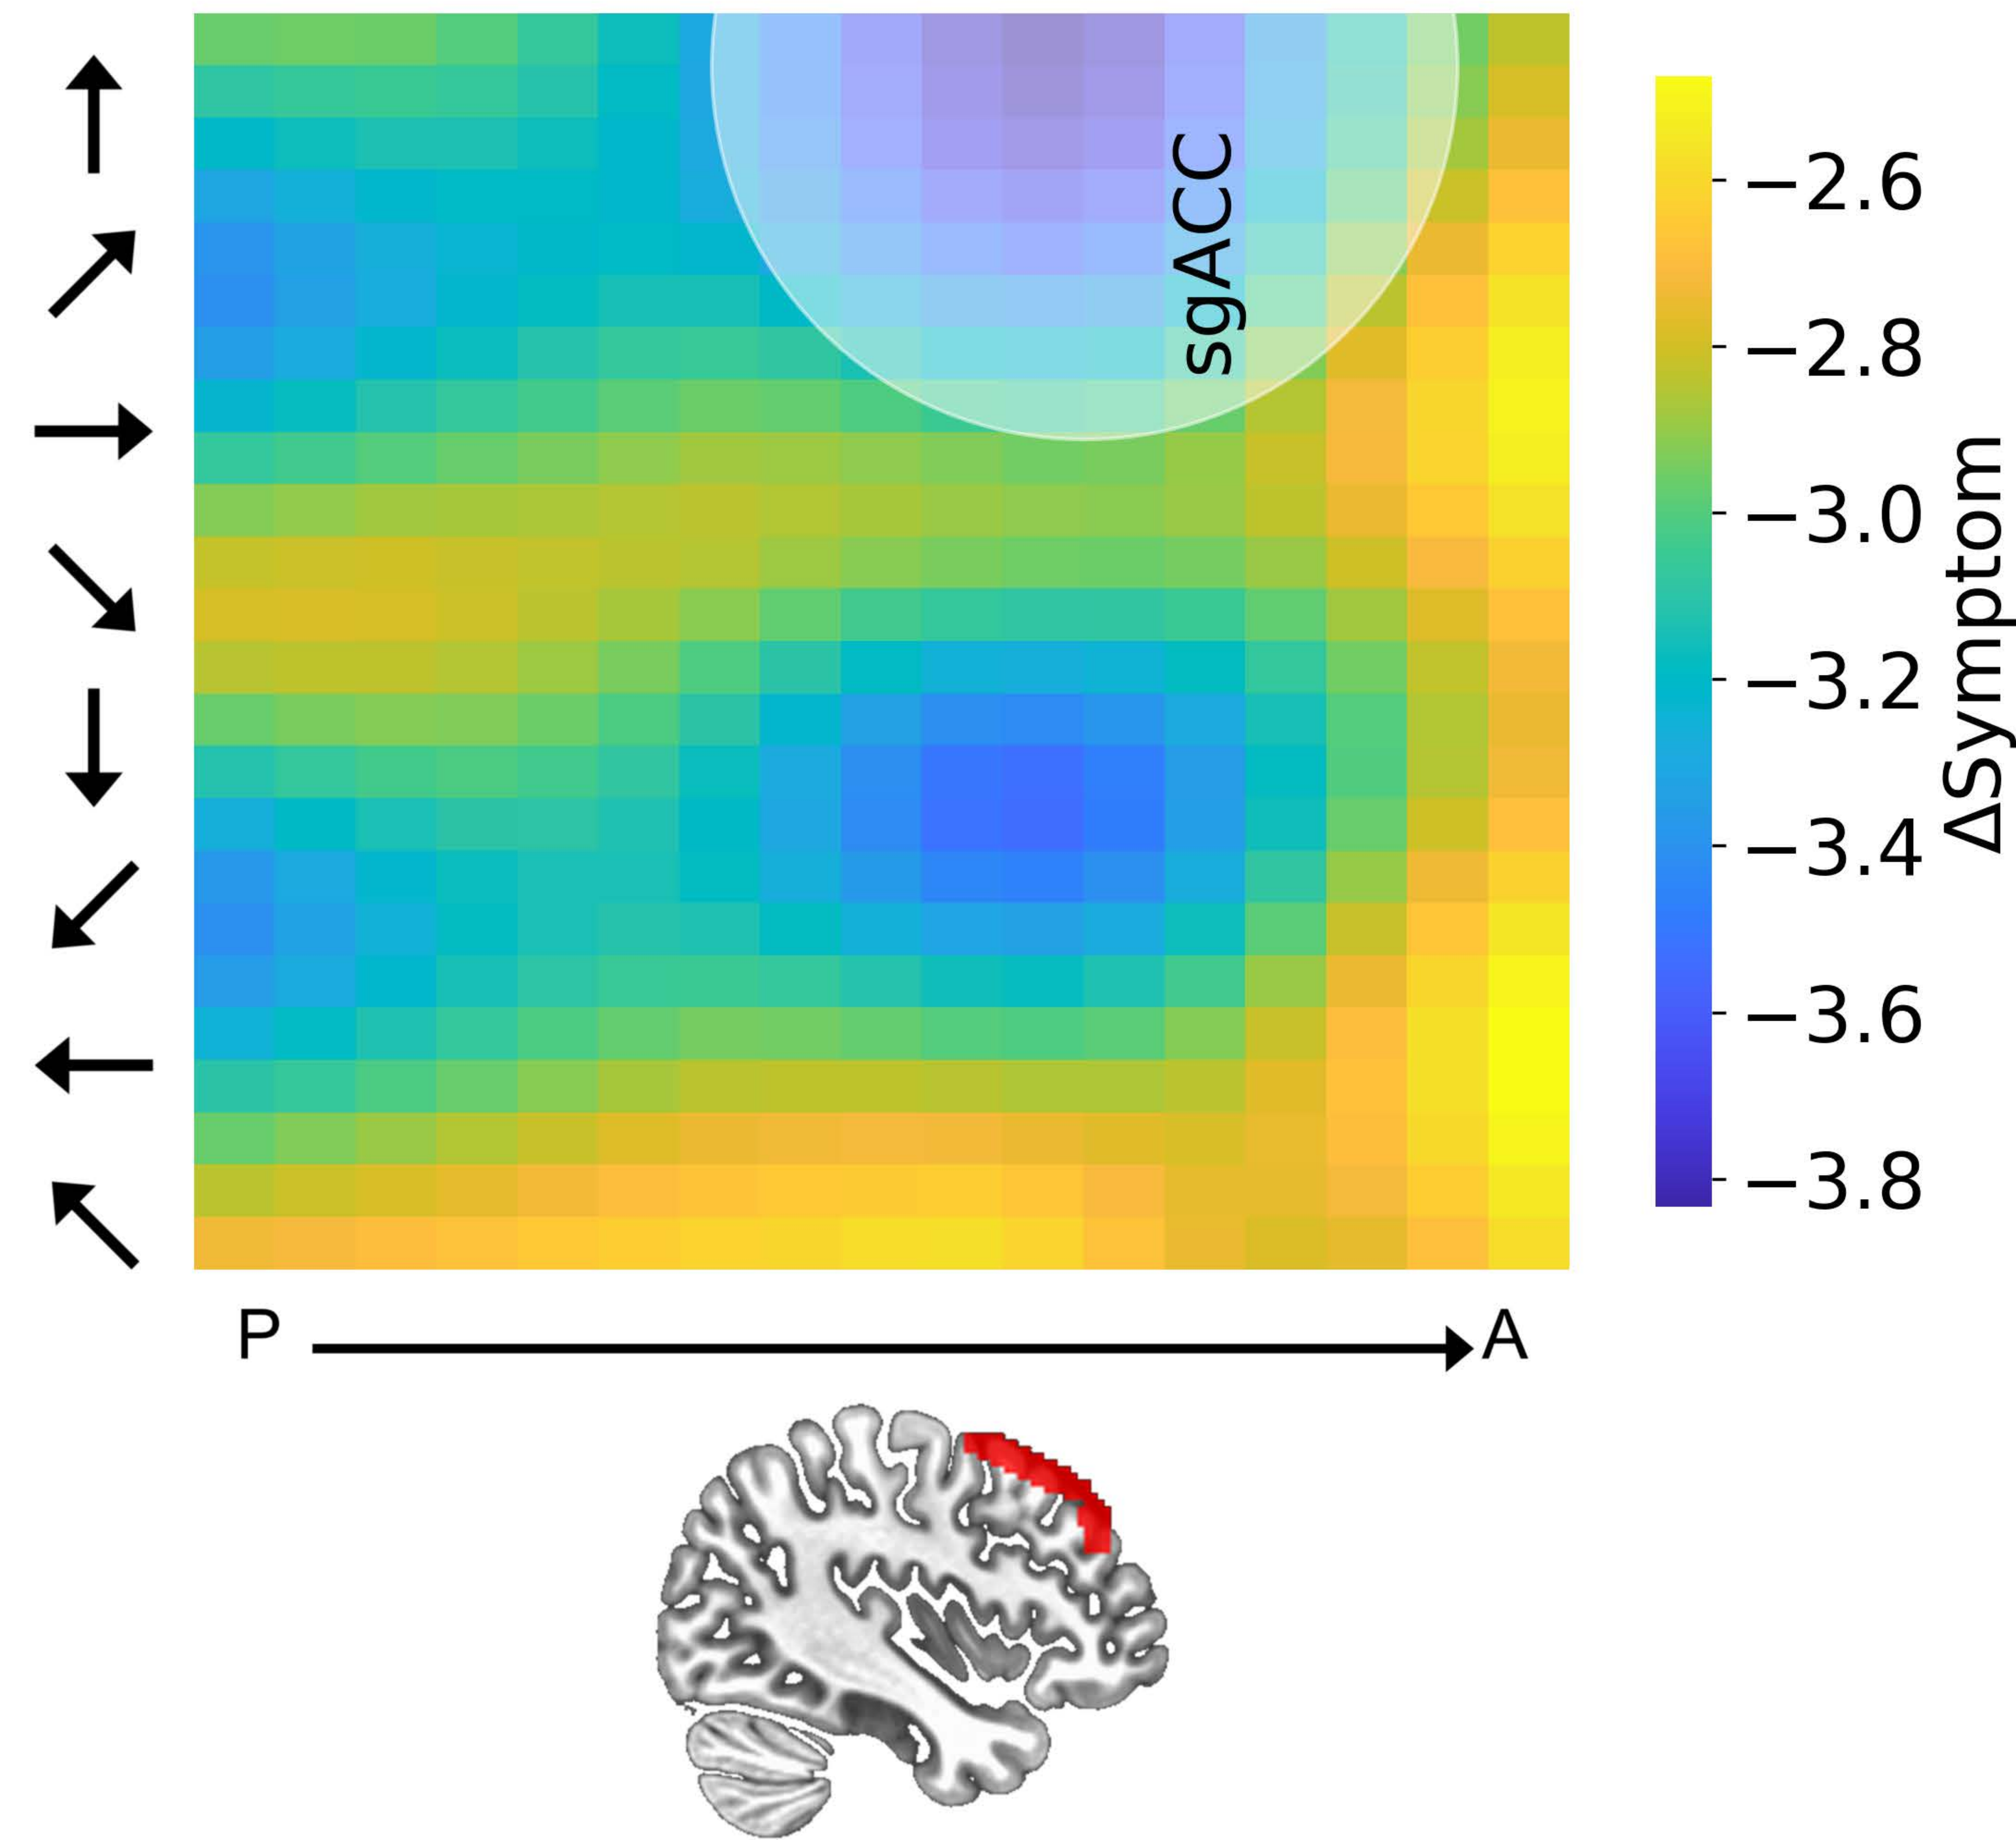



# INDARXD921NRV\_hamd\_left\_dlpfc

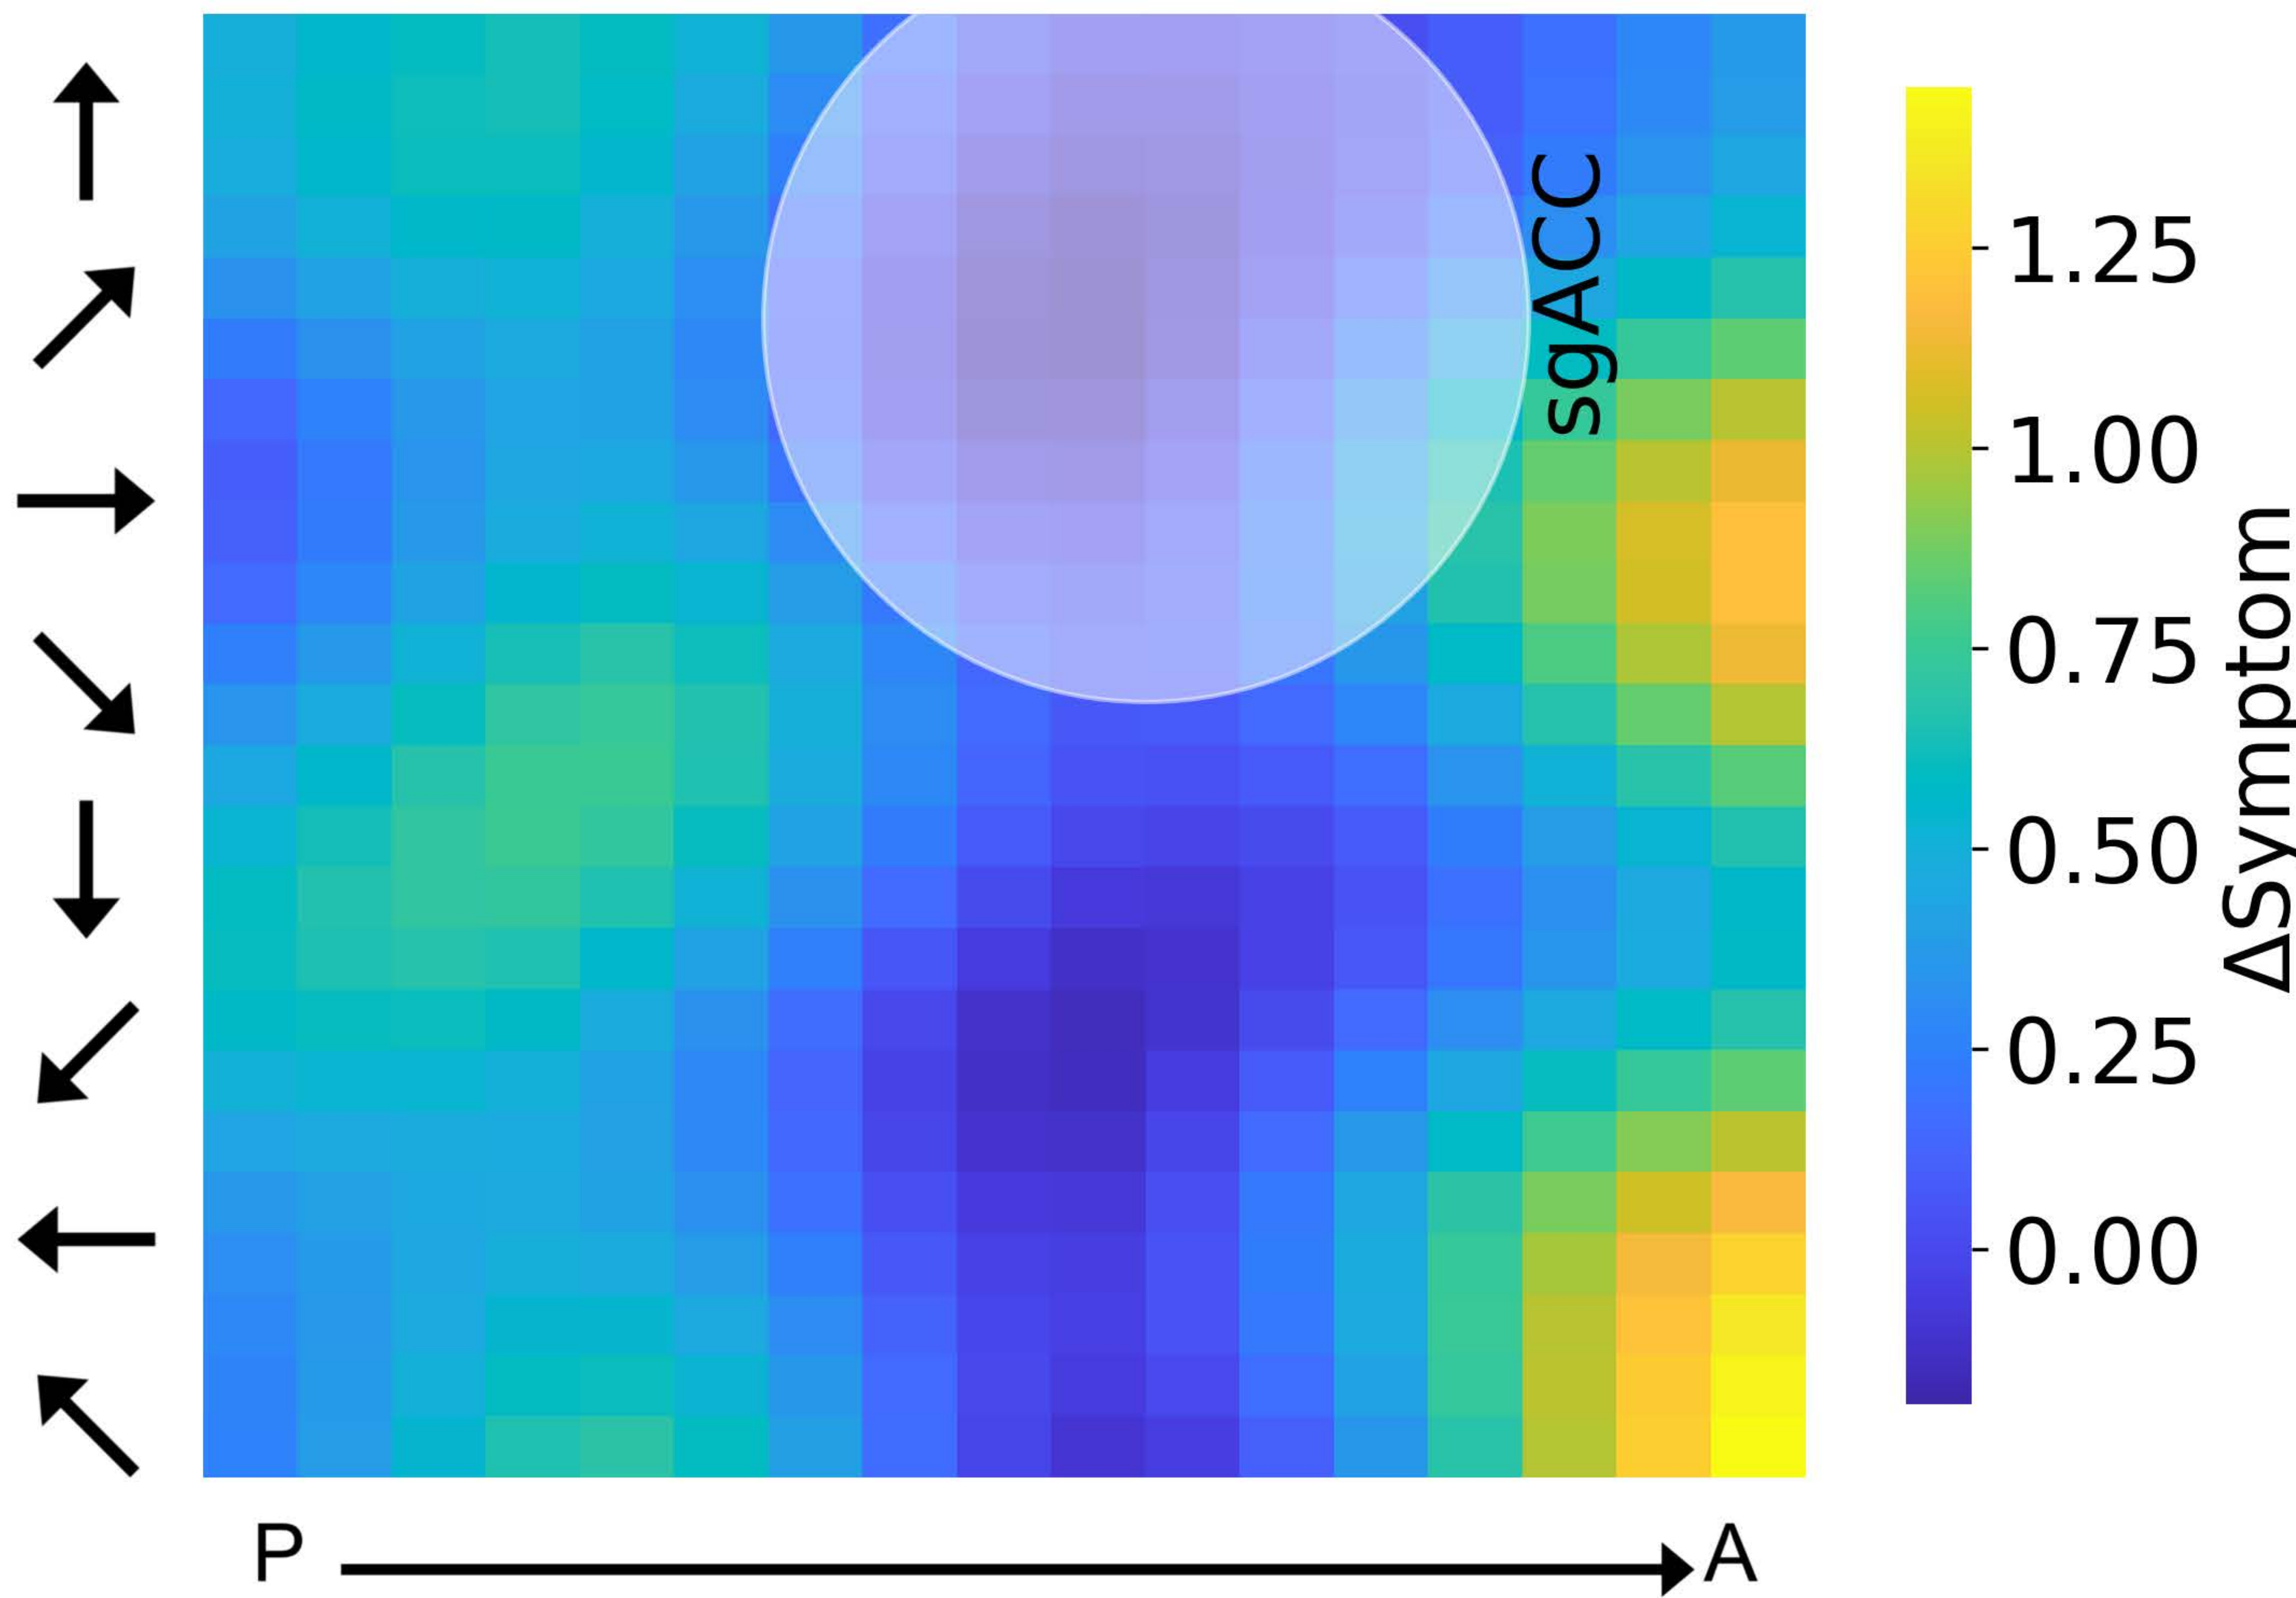



# INDARXU500EFT\_hamd\_left\_dlpfc

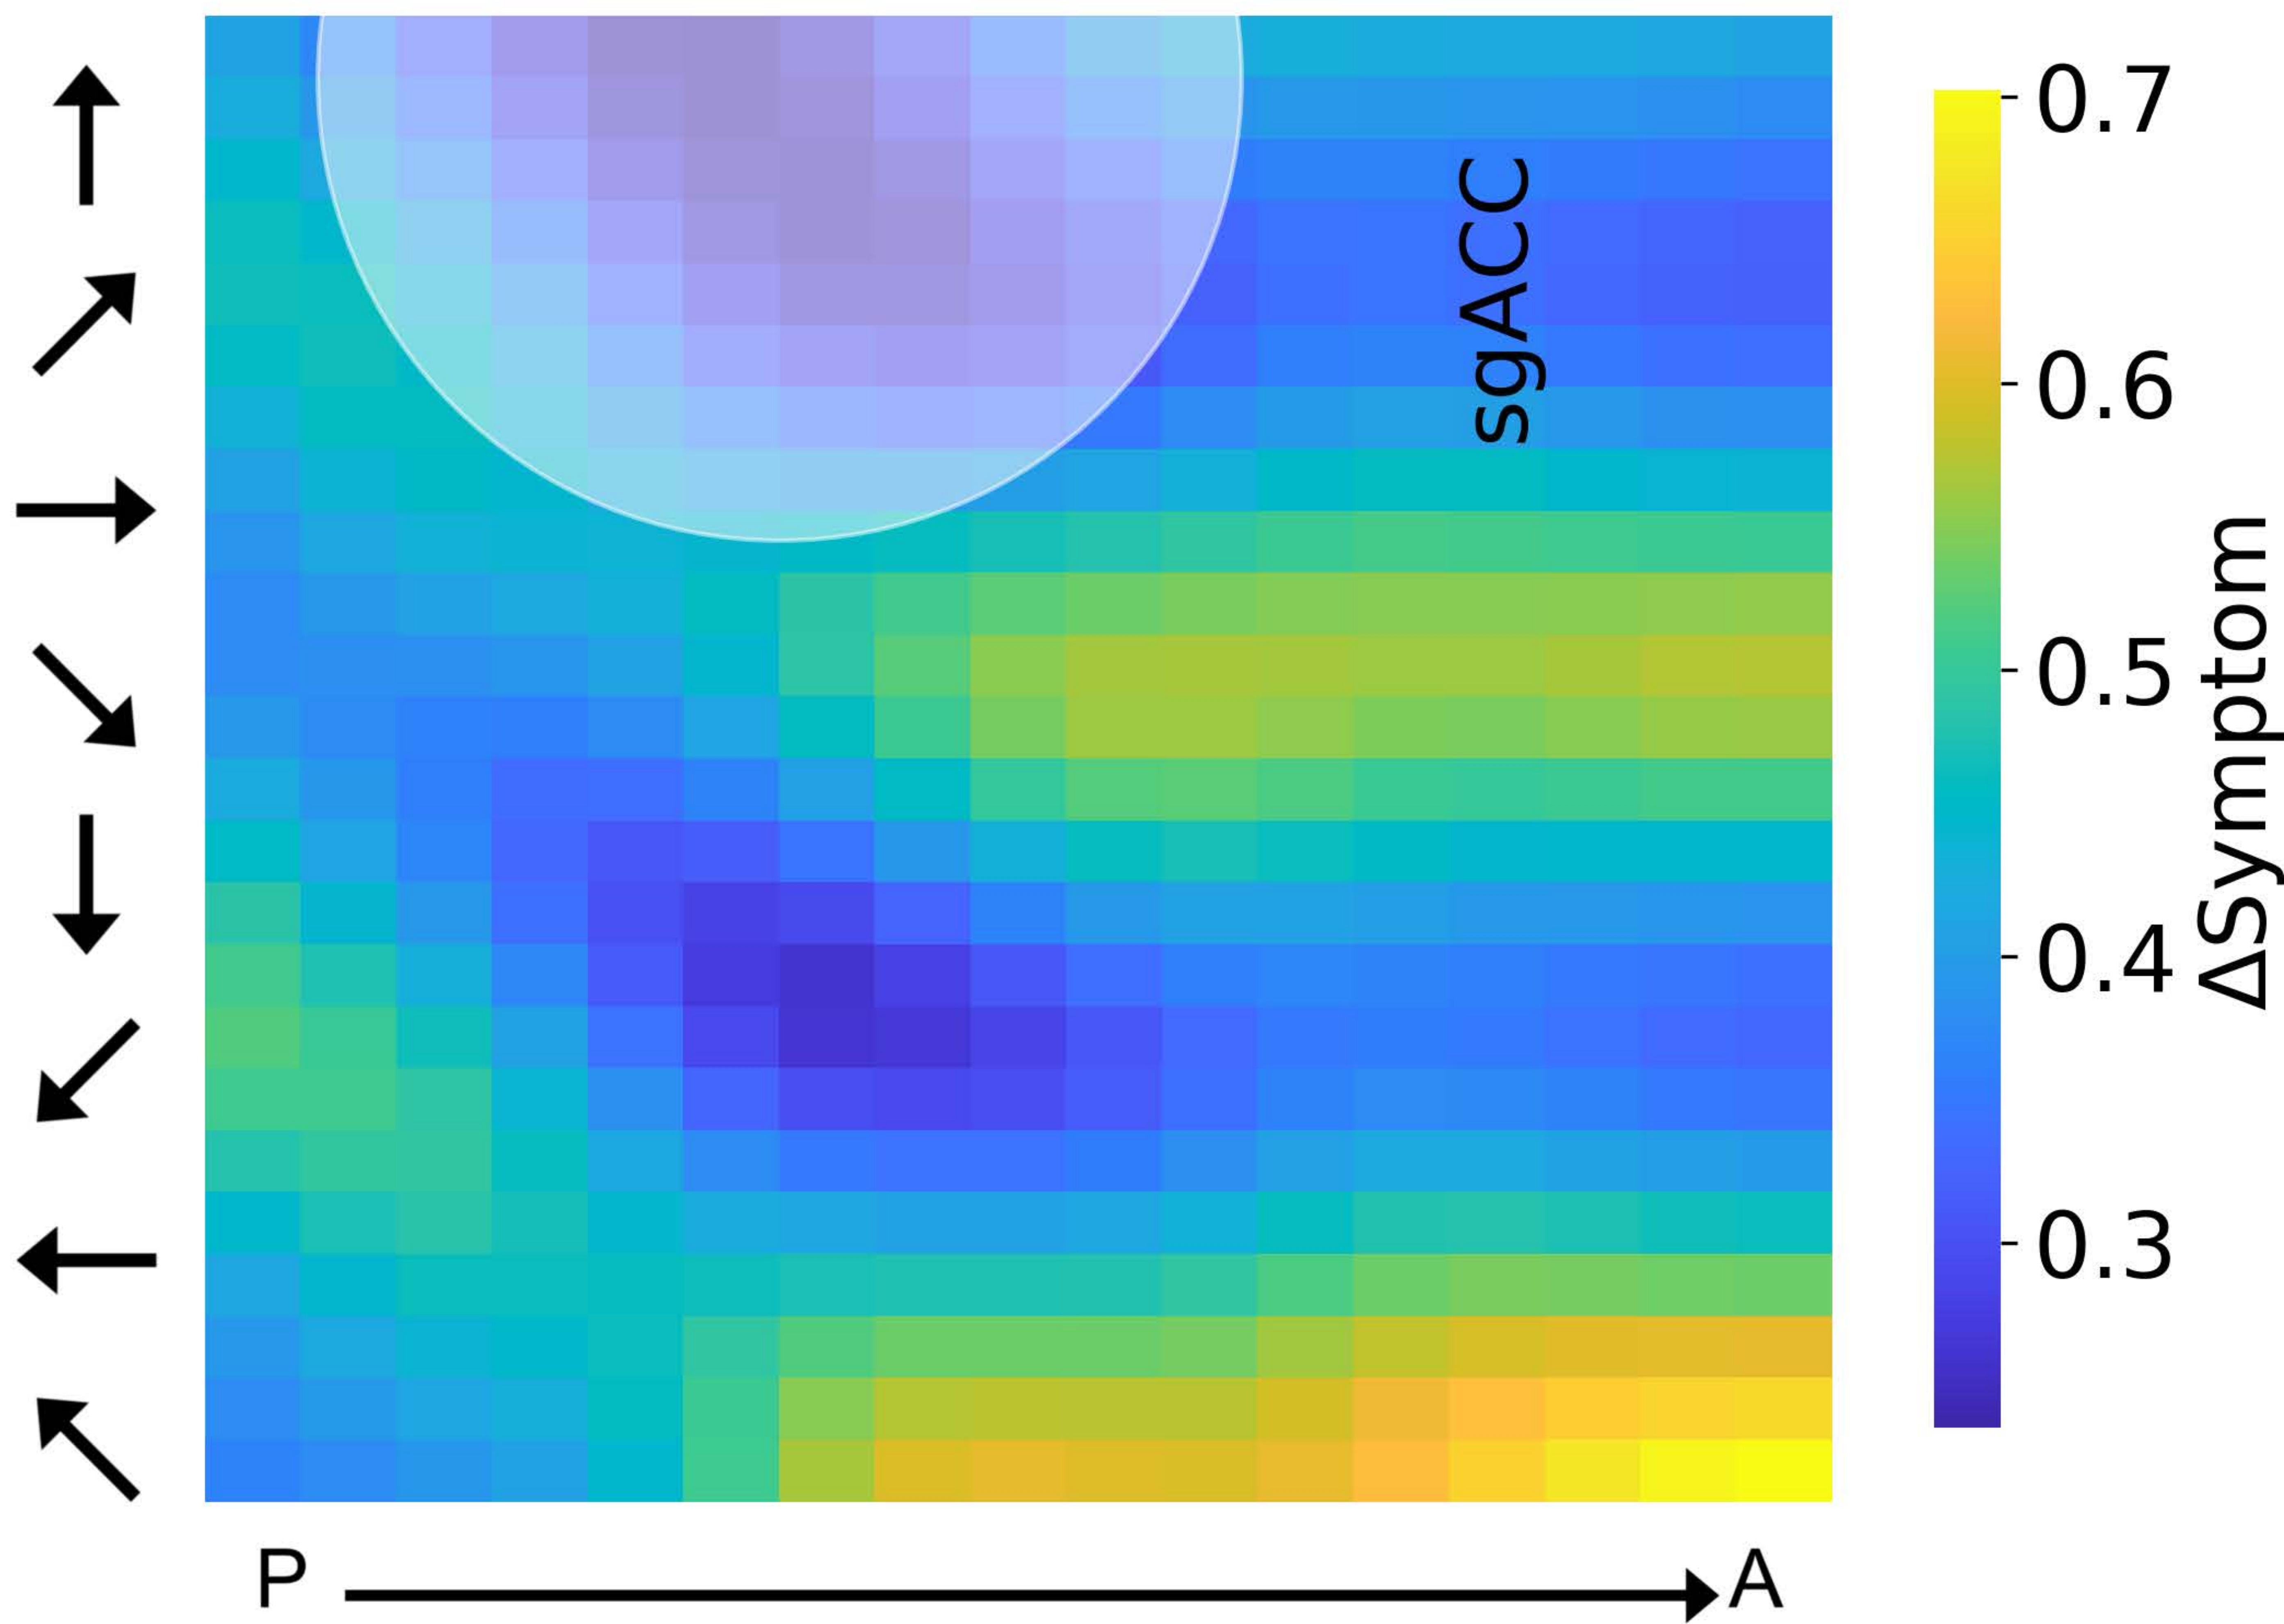



# NDARYB181GTB\_hamd\_left\_dlpfc

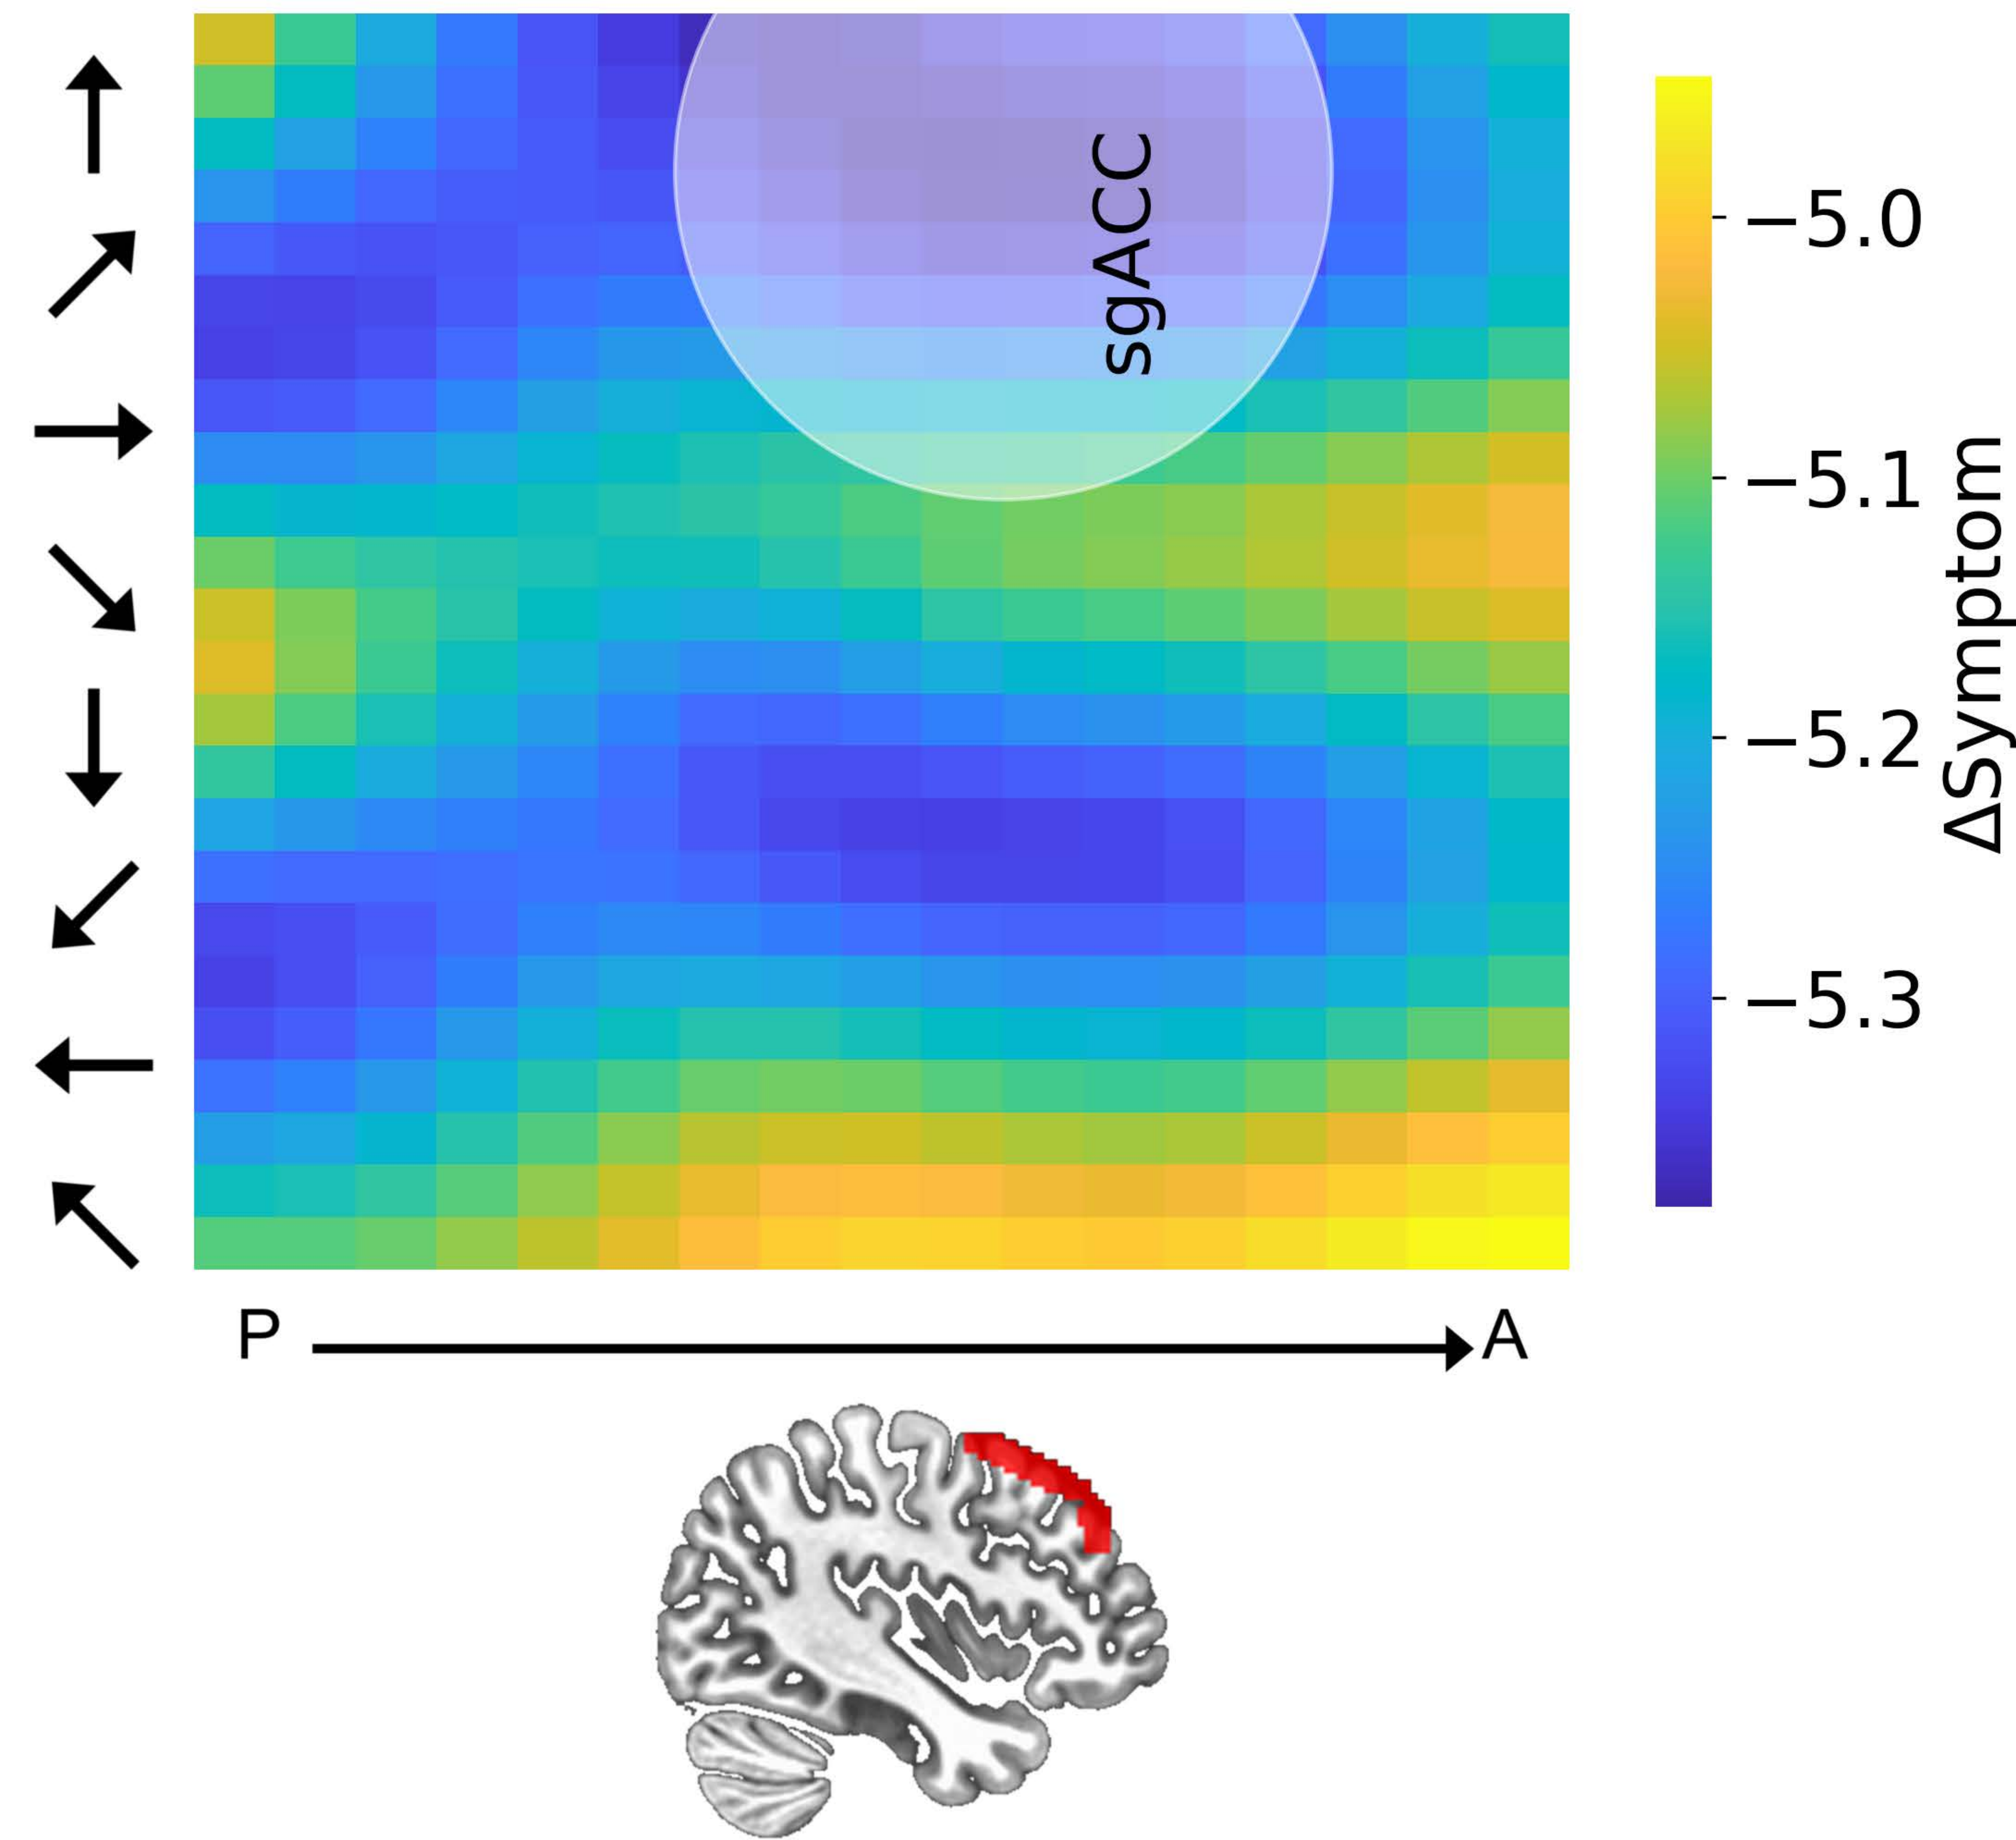



# NDARYD169AYQ\_hamd\_left\_dlpfc

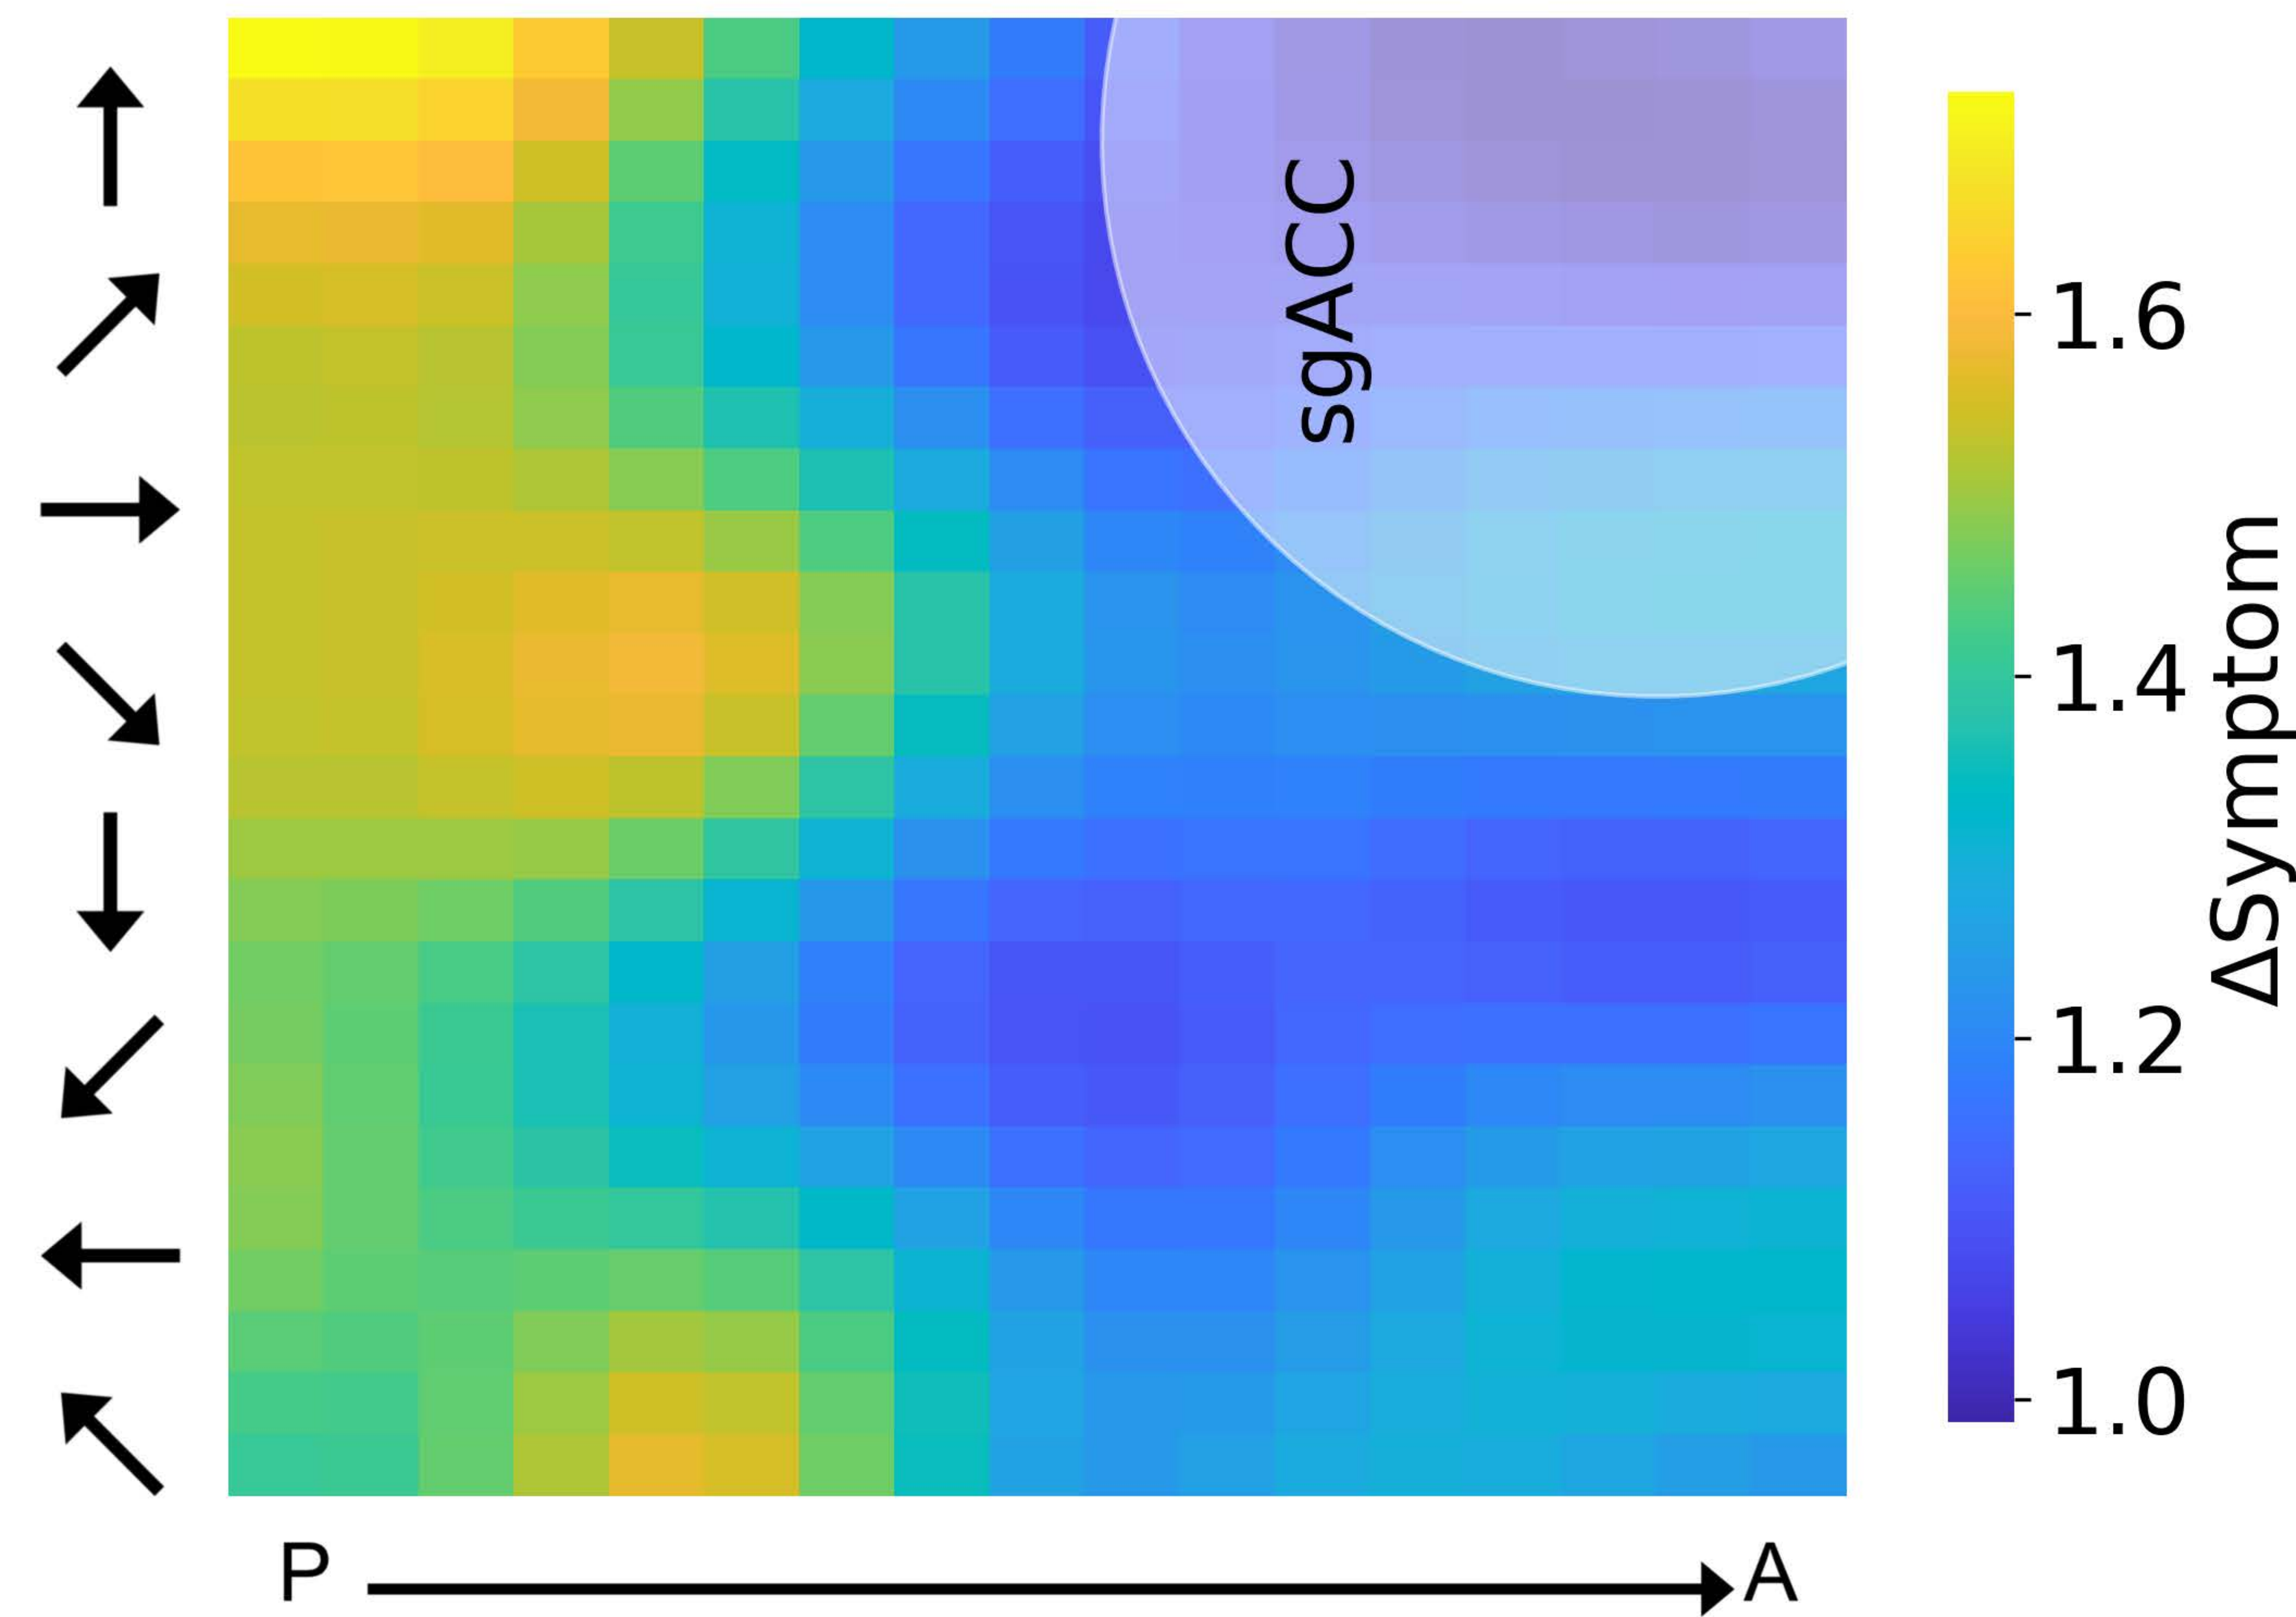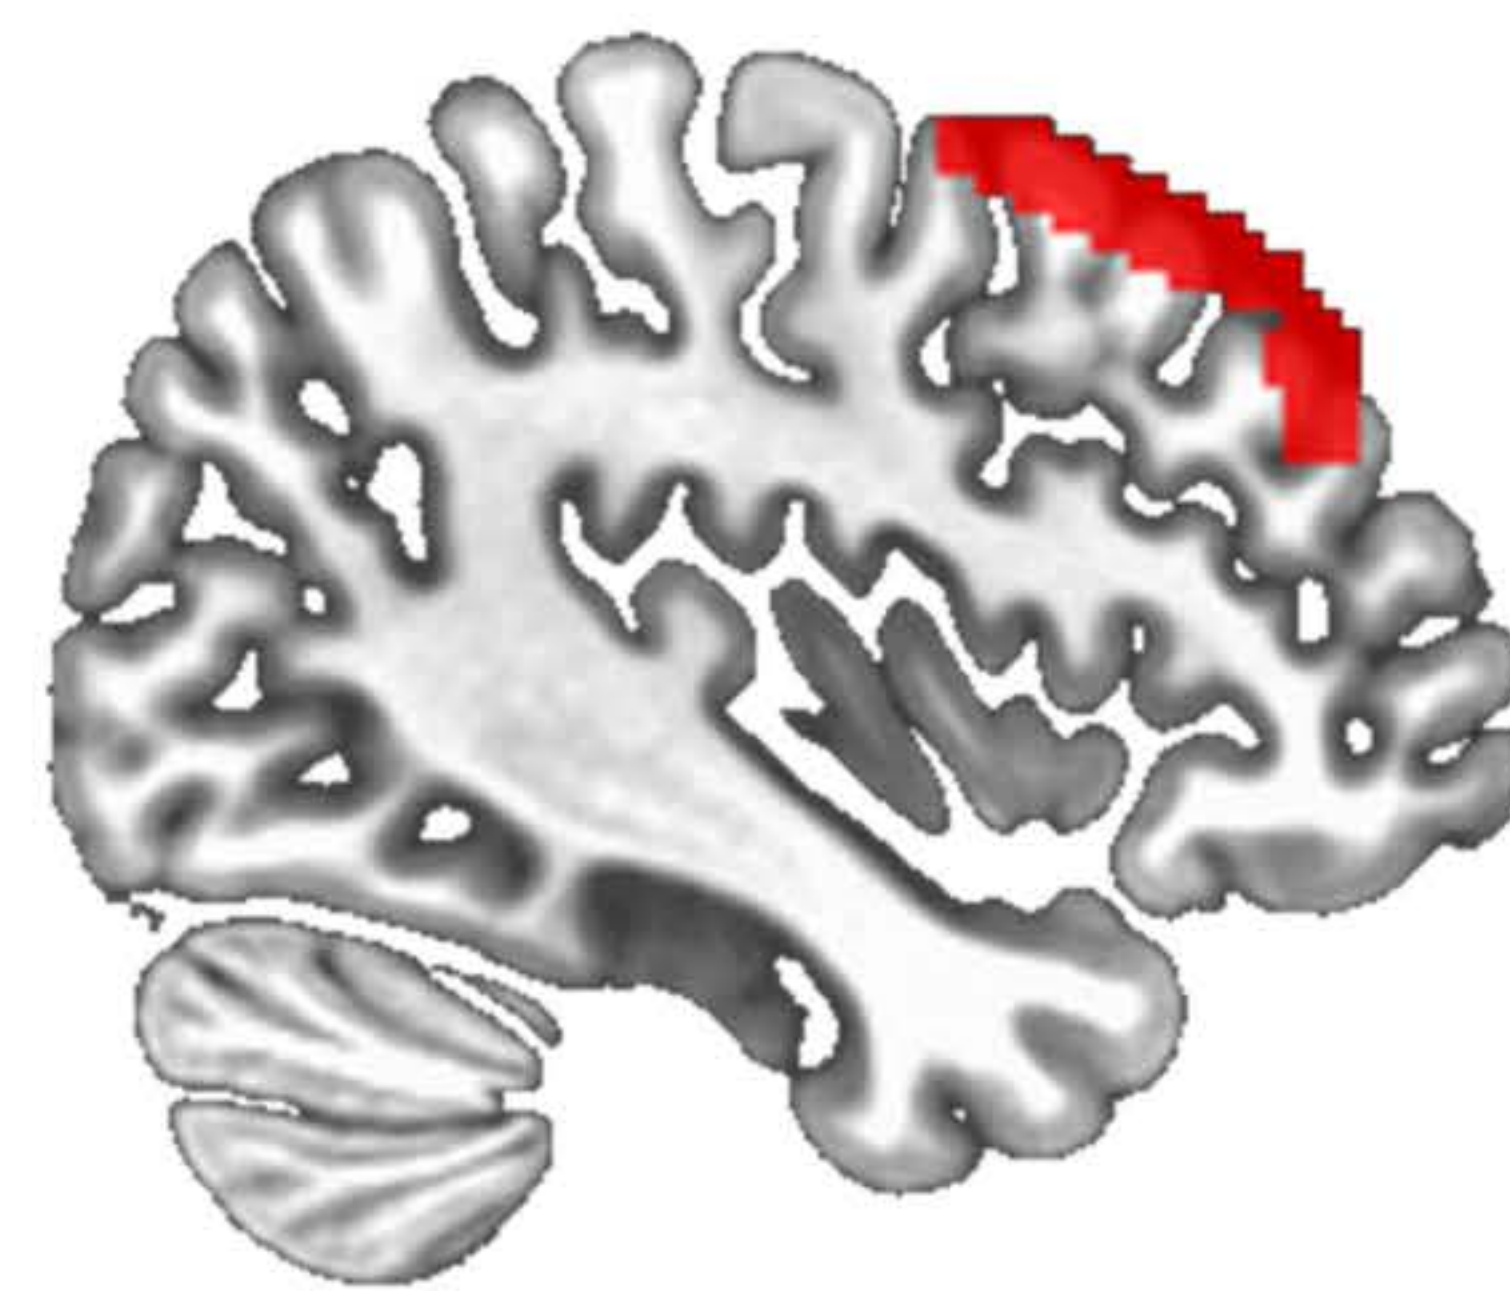



# NDARYE405JL\_hamd\_left\_dlpfc

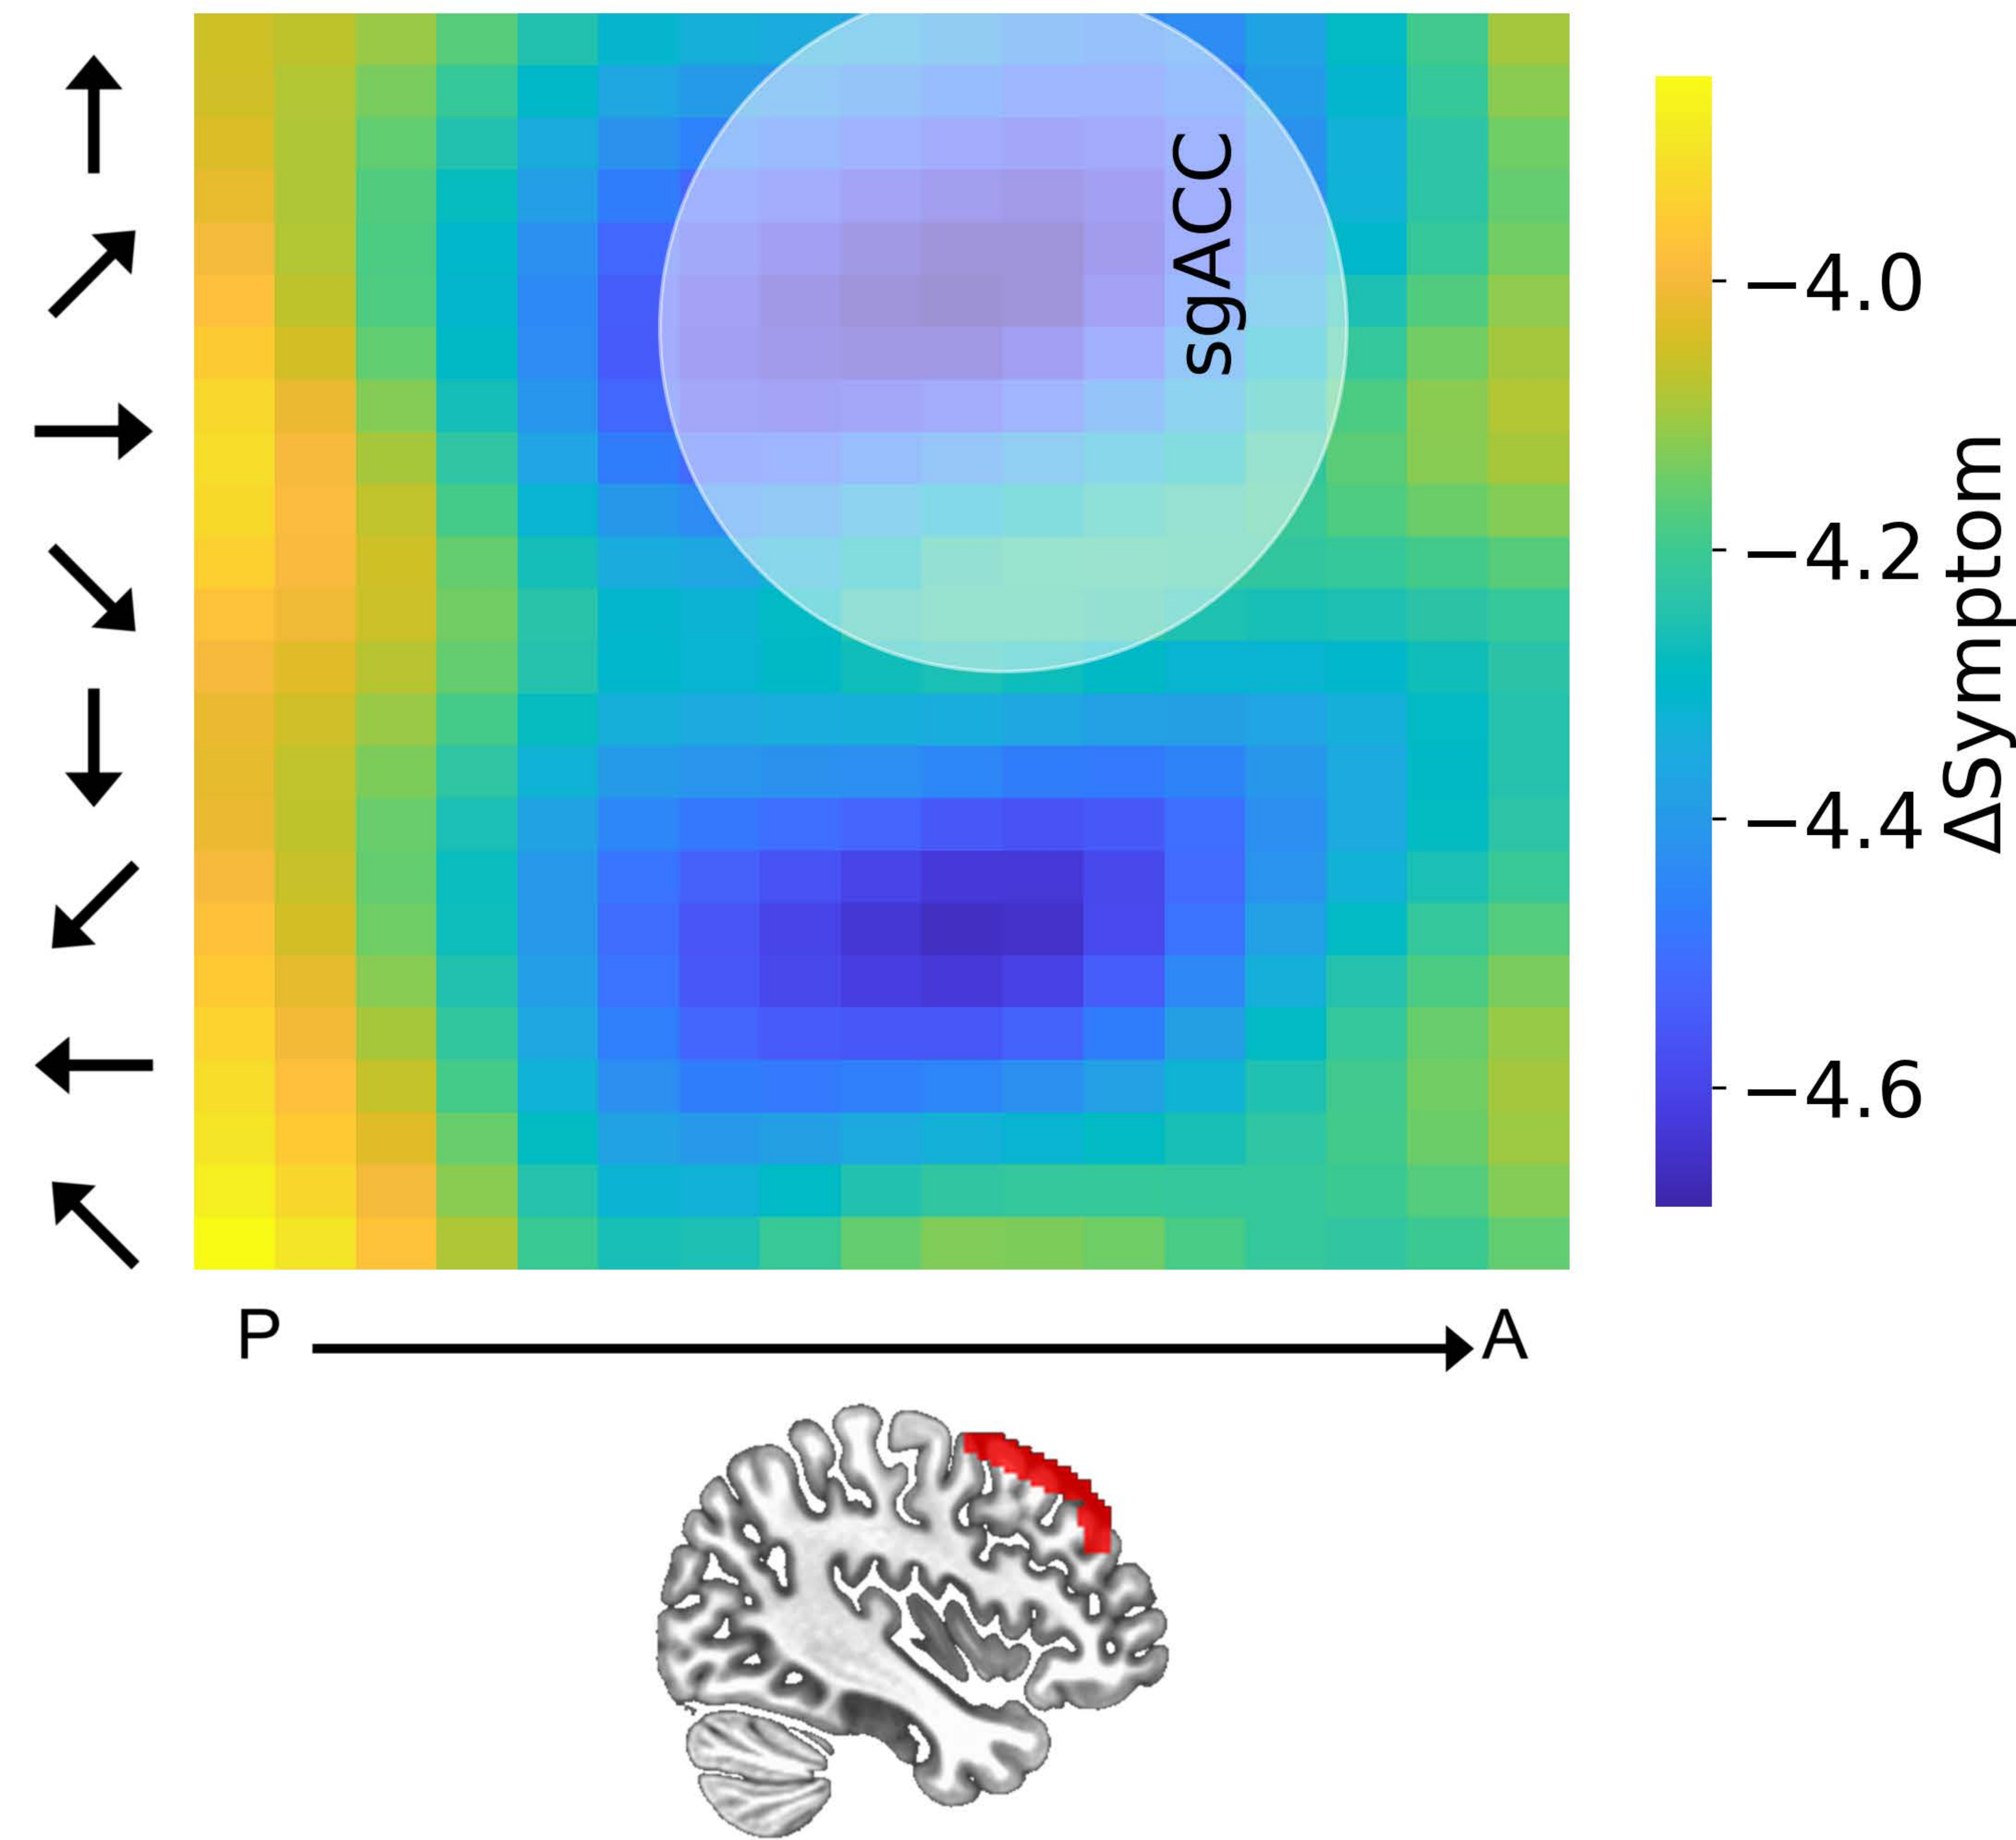



# NDARYM648GK3\_hamd\_left\_dlpfc

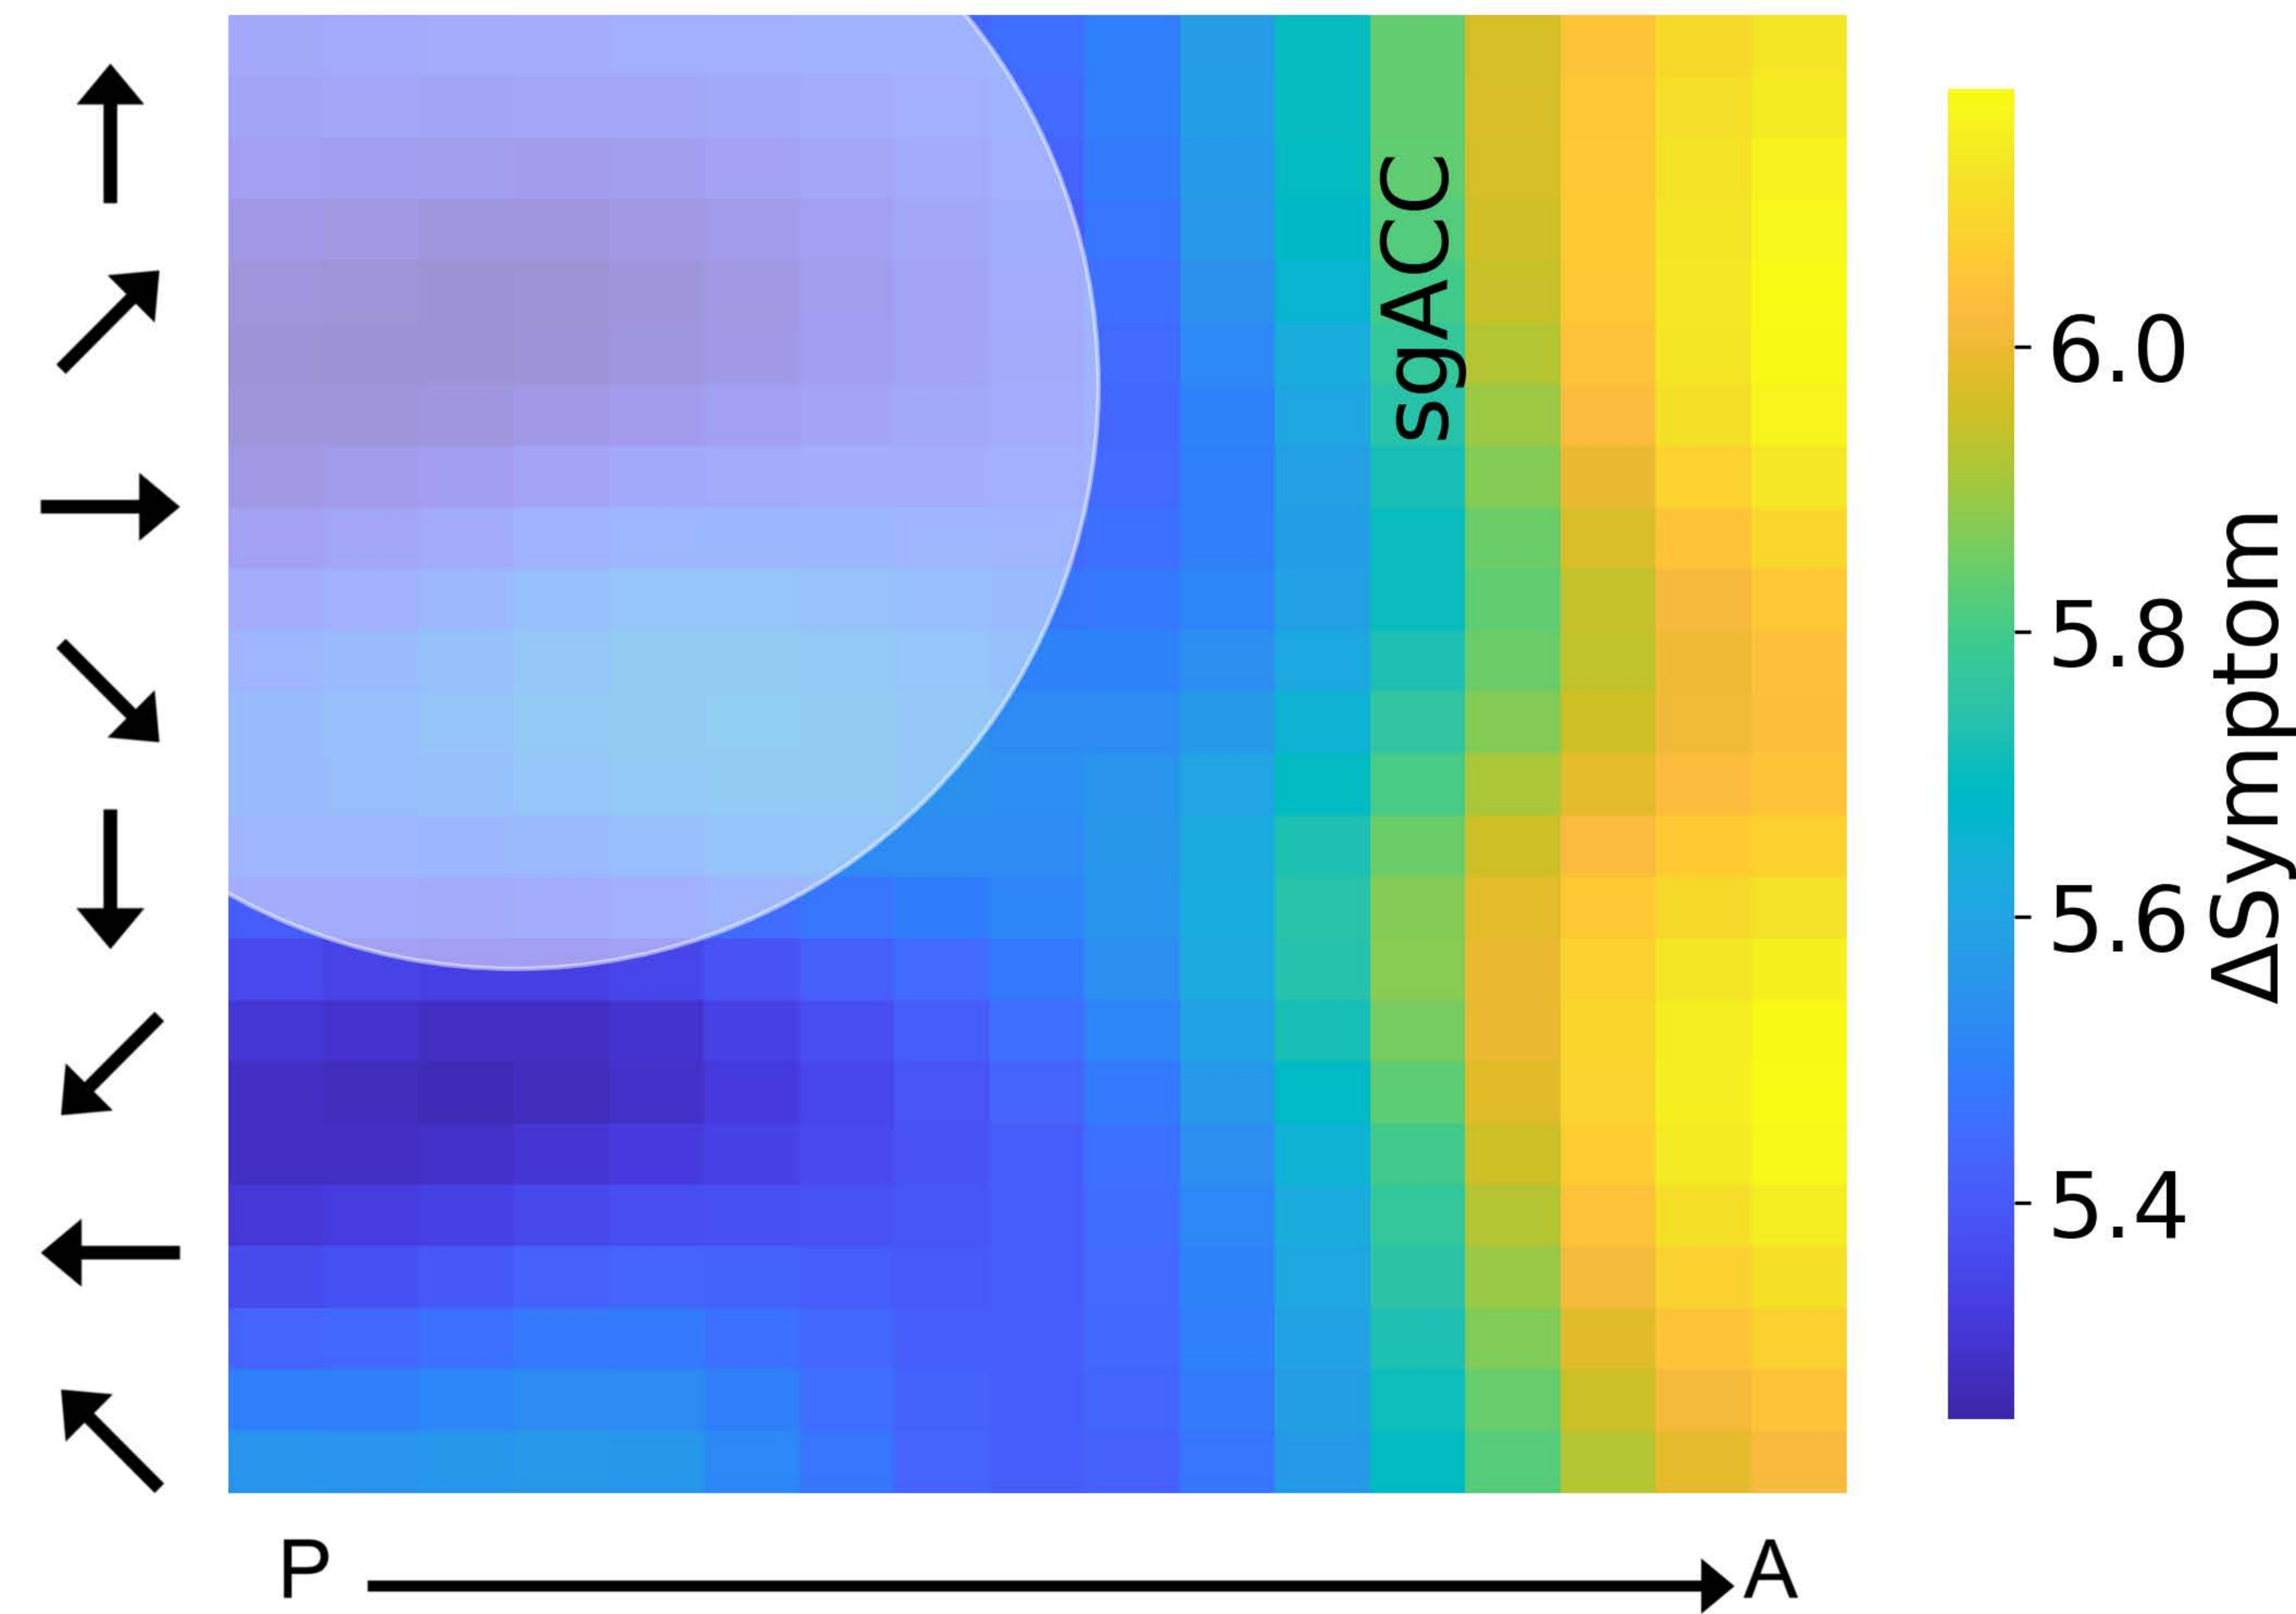



# NDARZH200GZU\_hamd\_left\_dlpfc

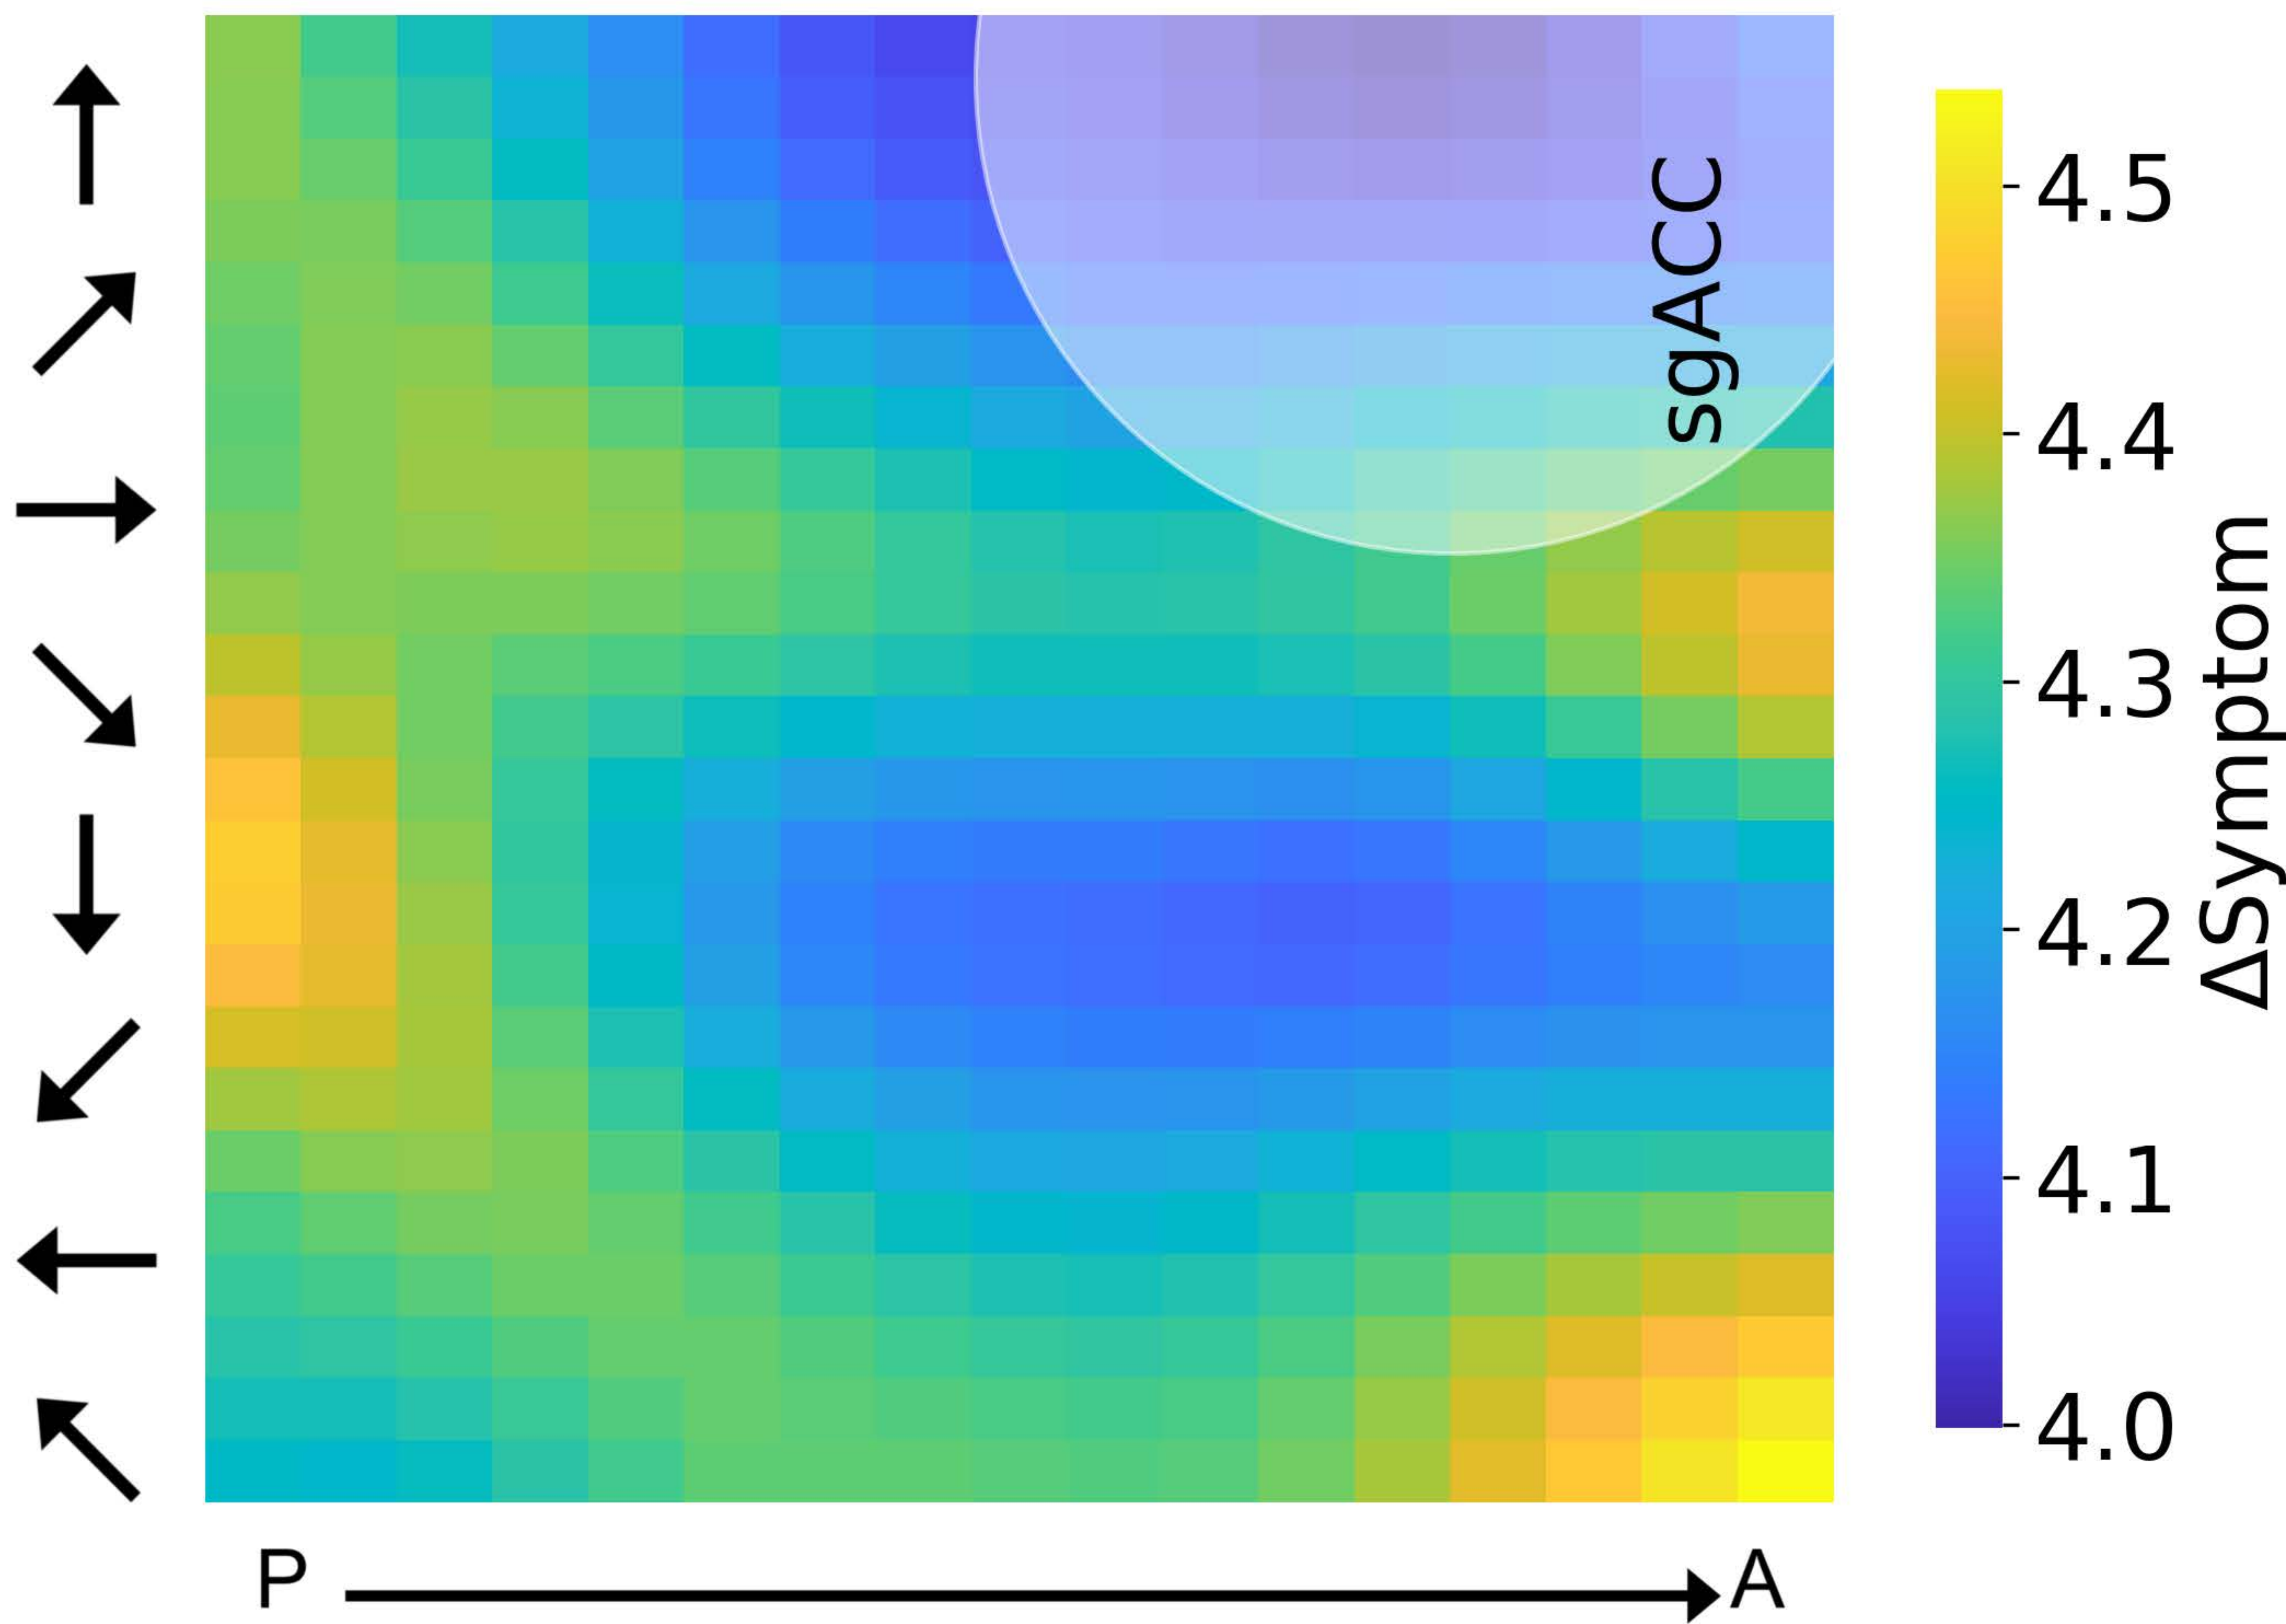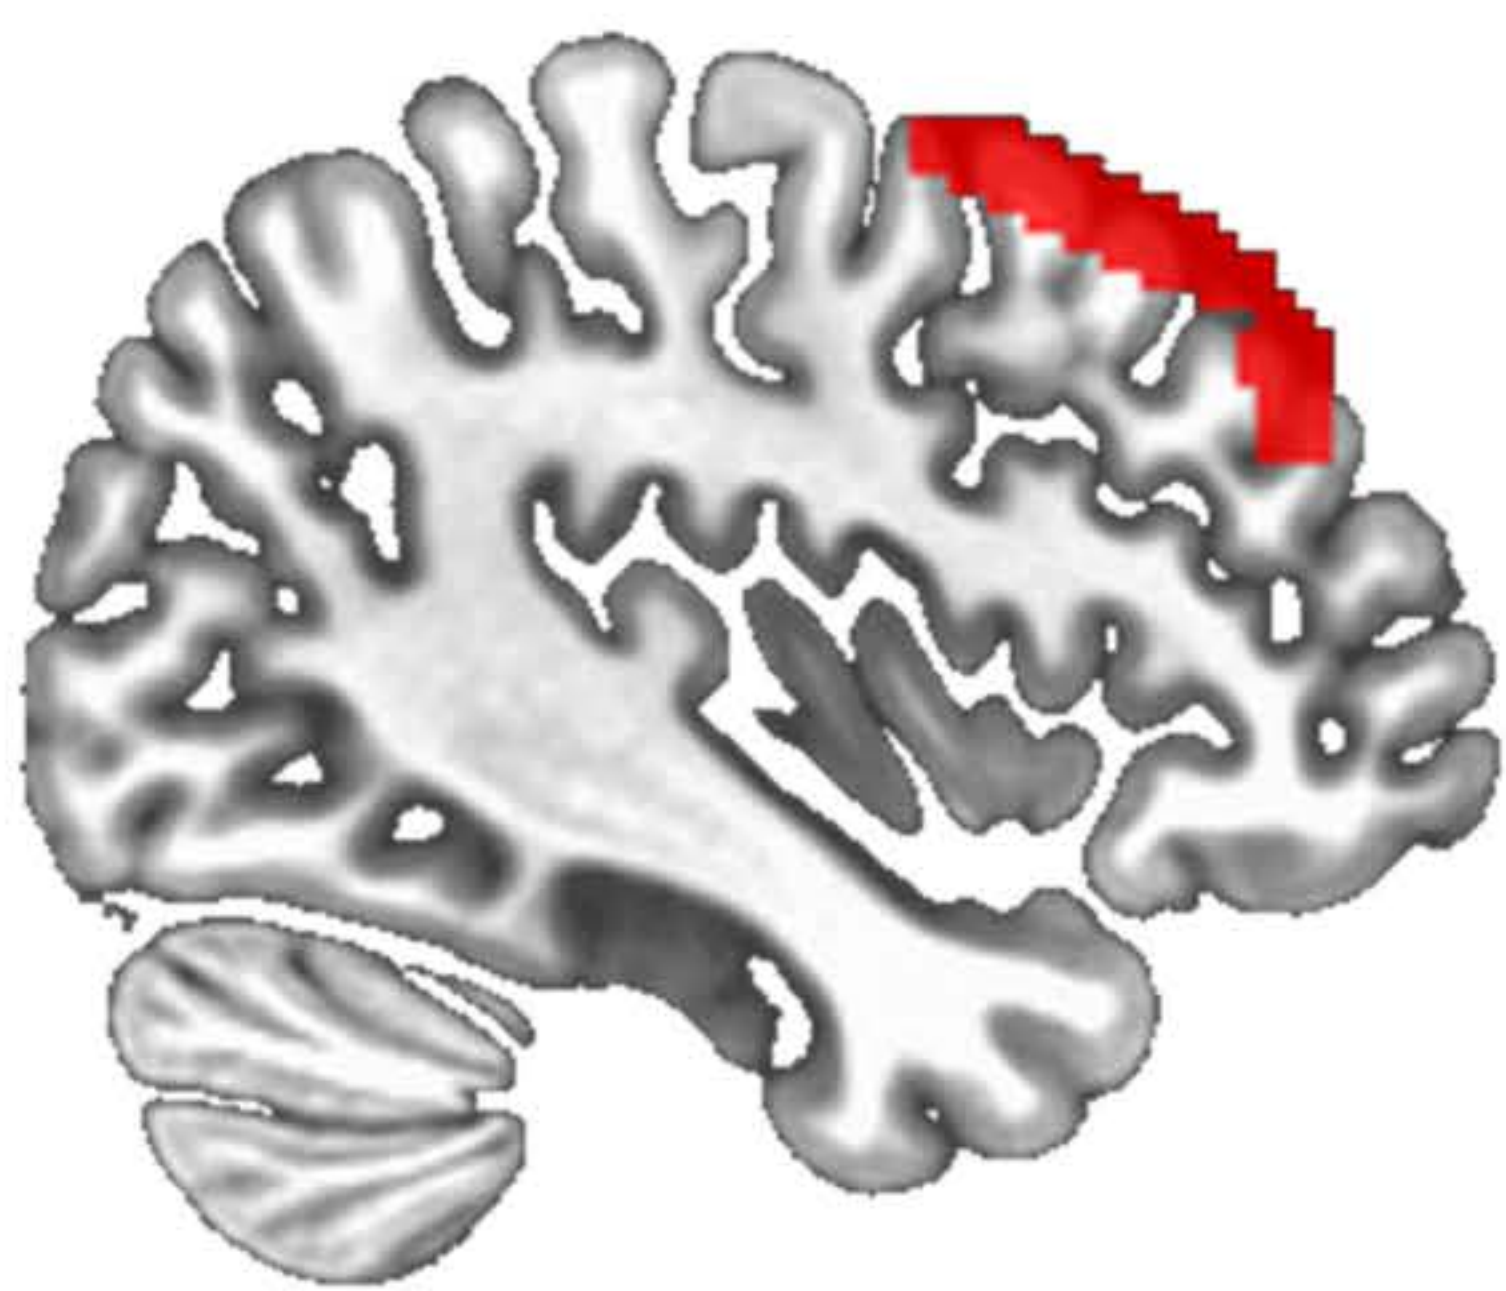



# NDARBB471NAU\_hamd\_right\_dlpfc

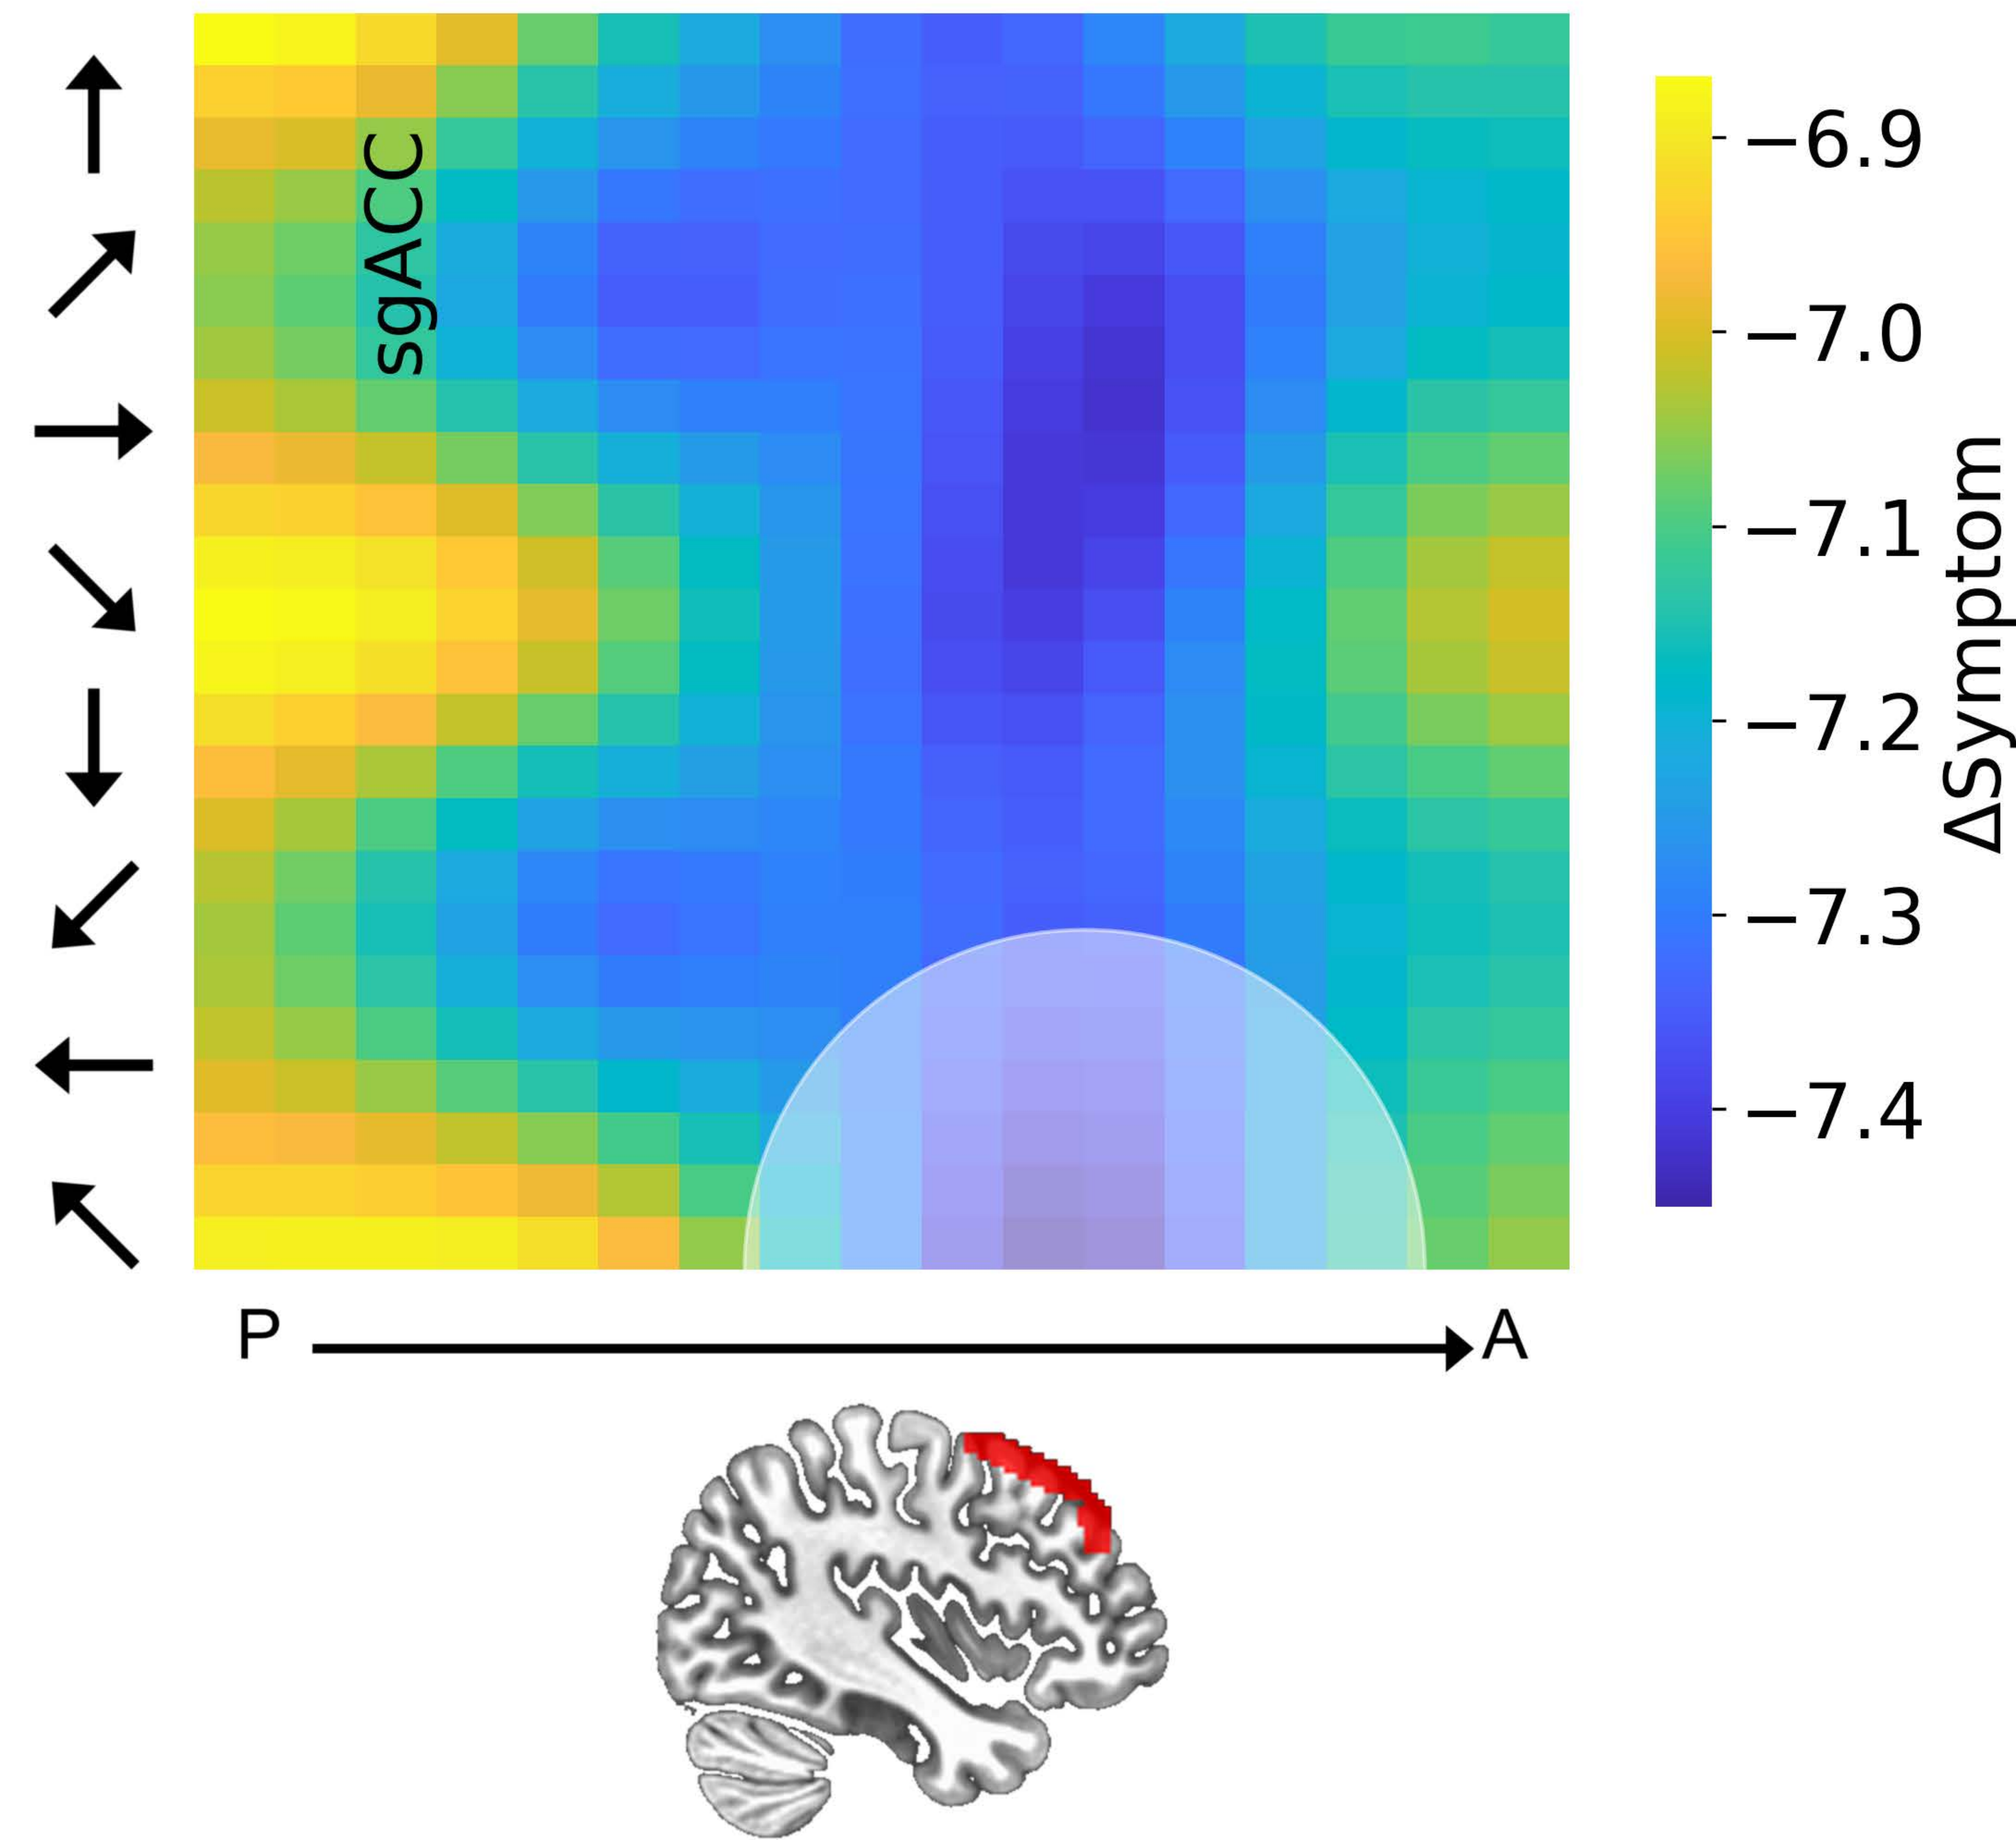



# NDARBG497RE1\_hamd\_right\_dlpfc

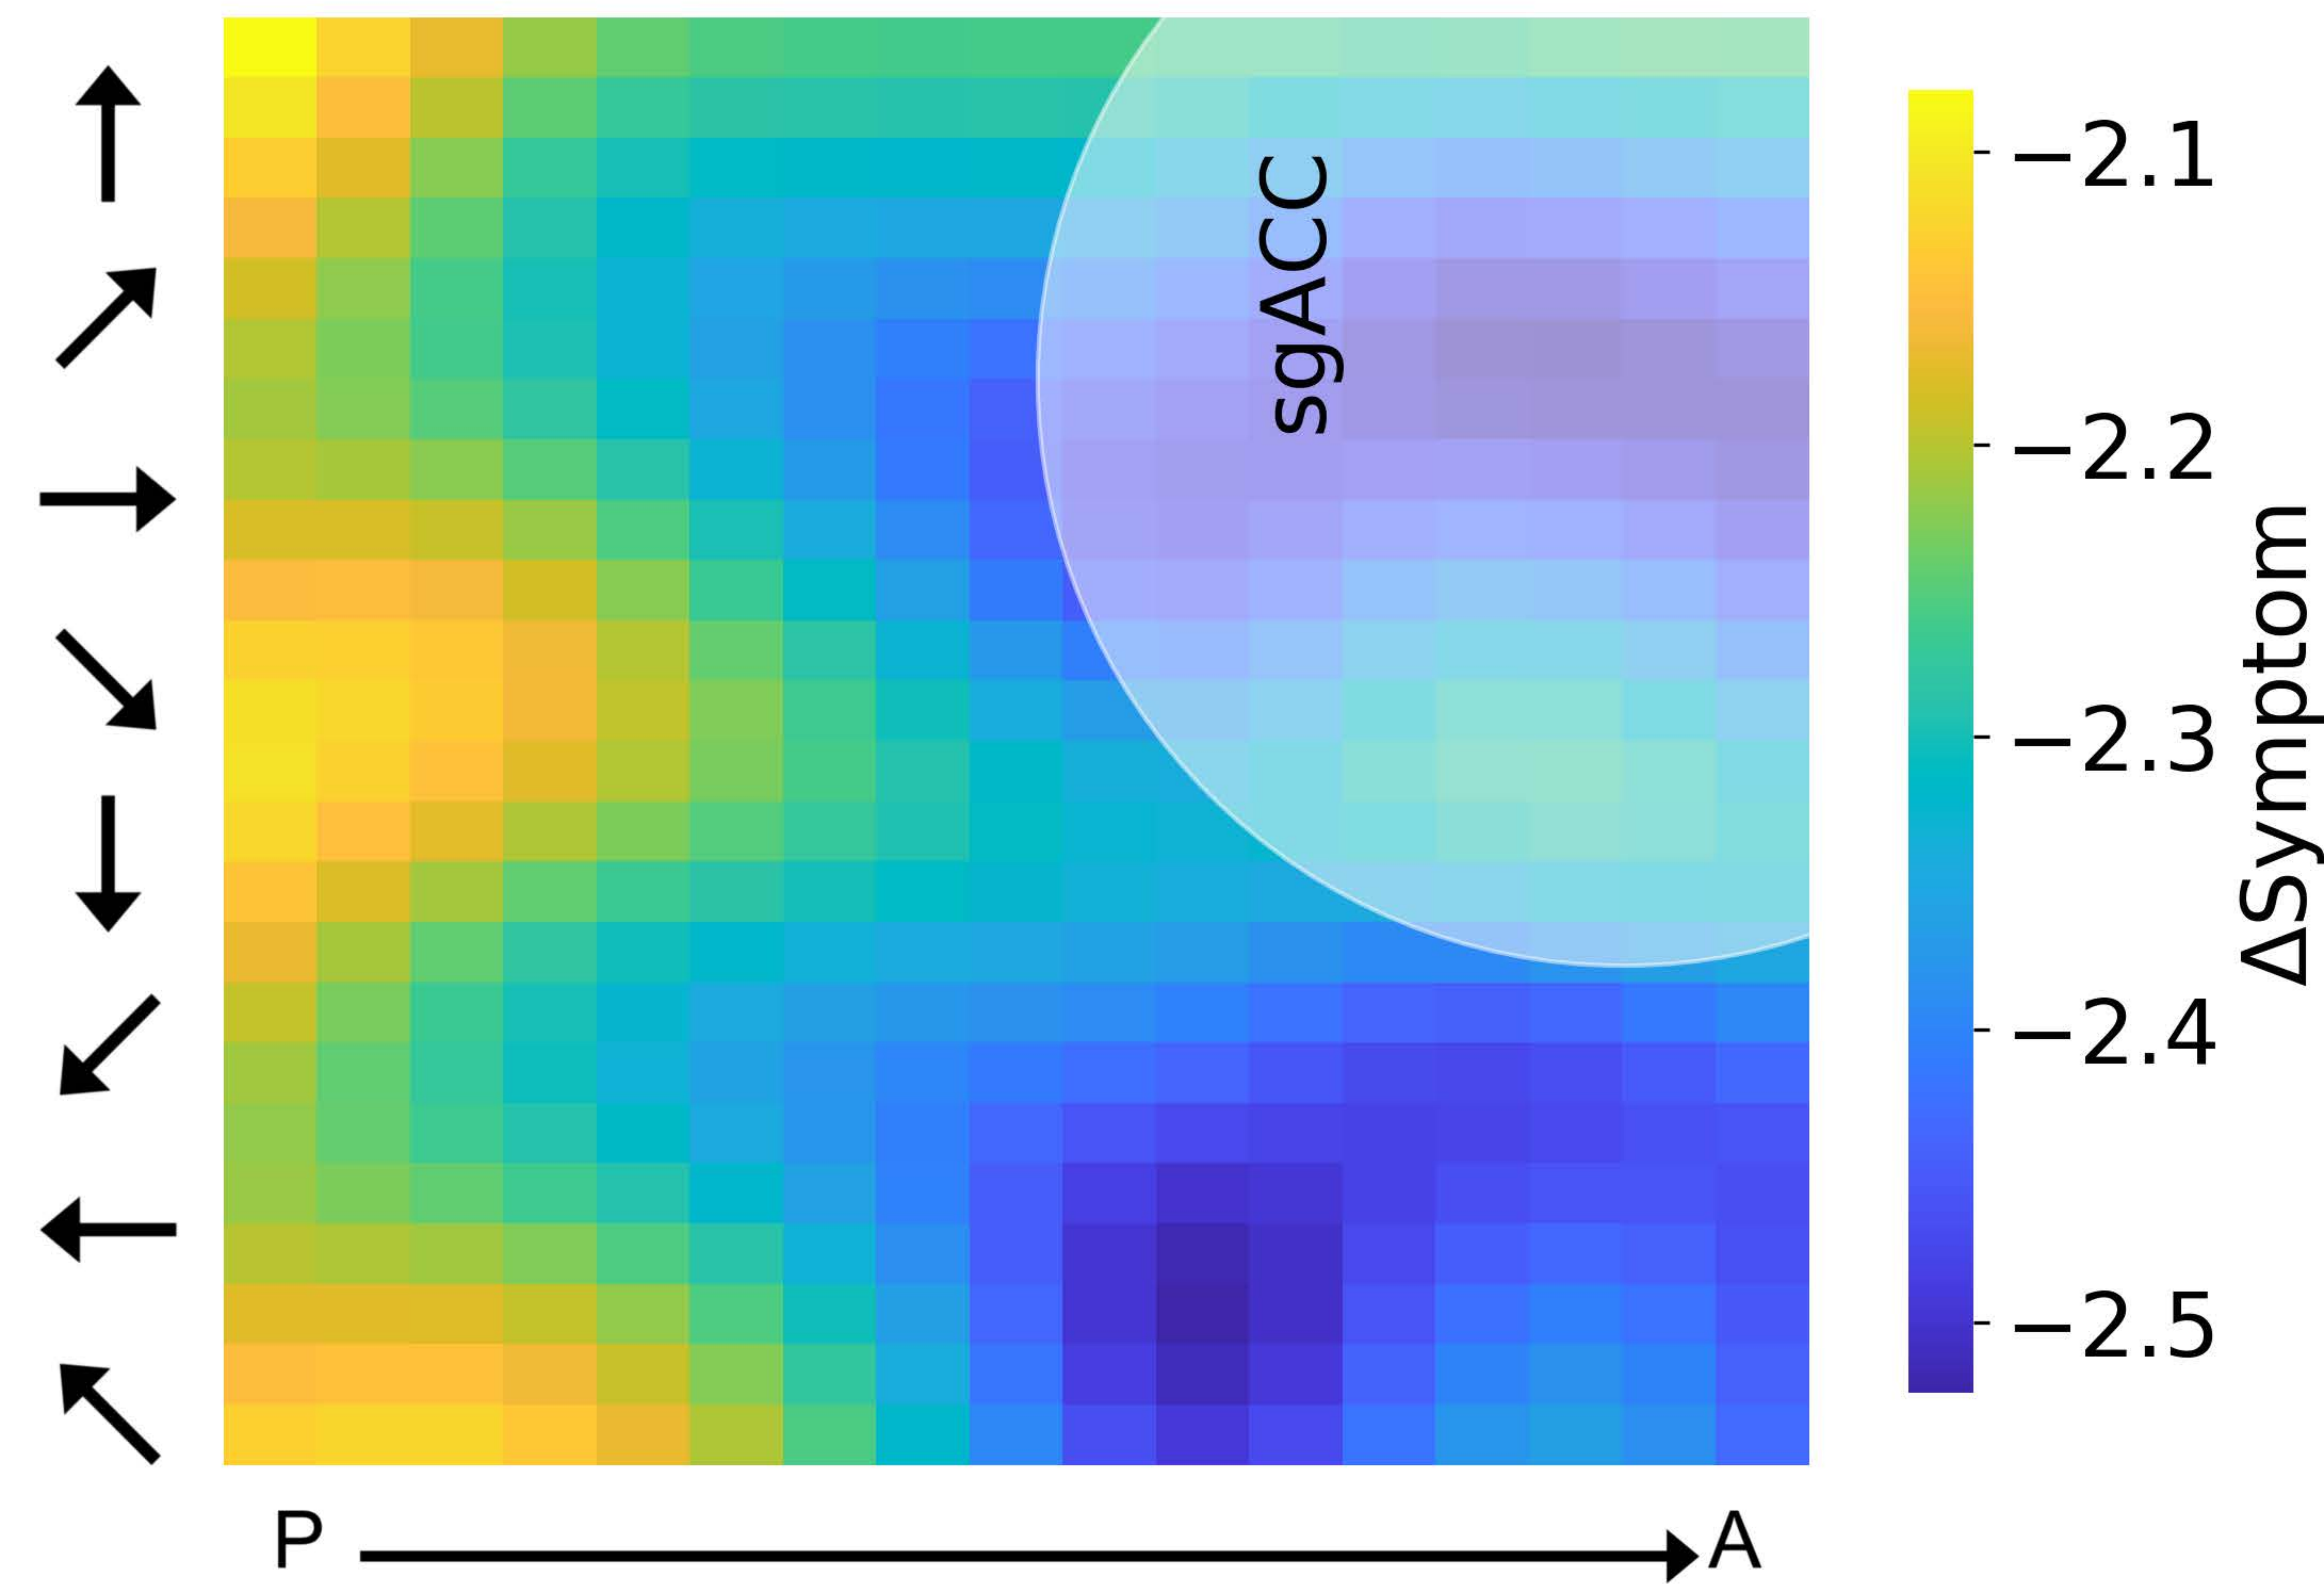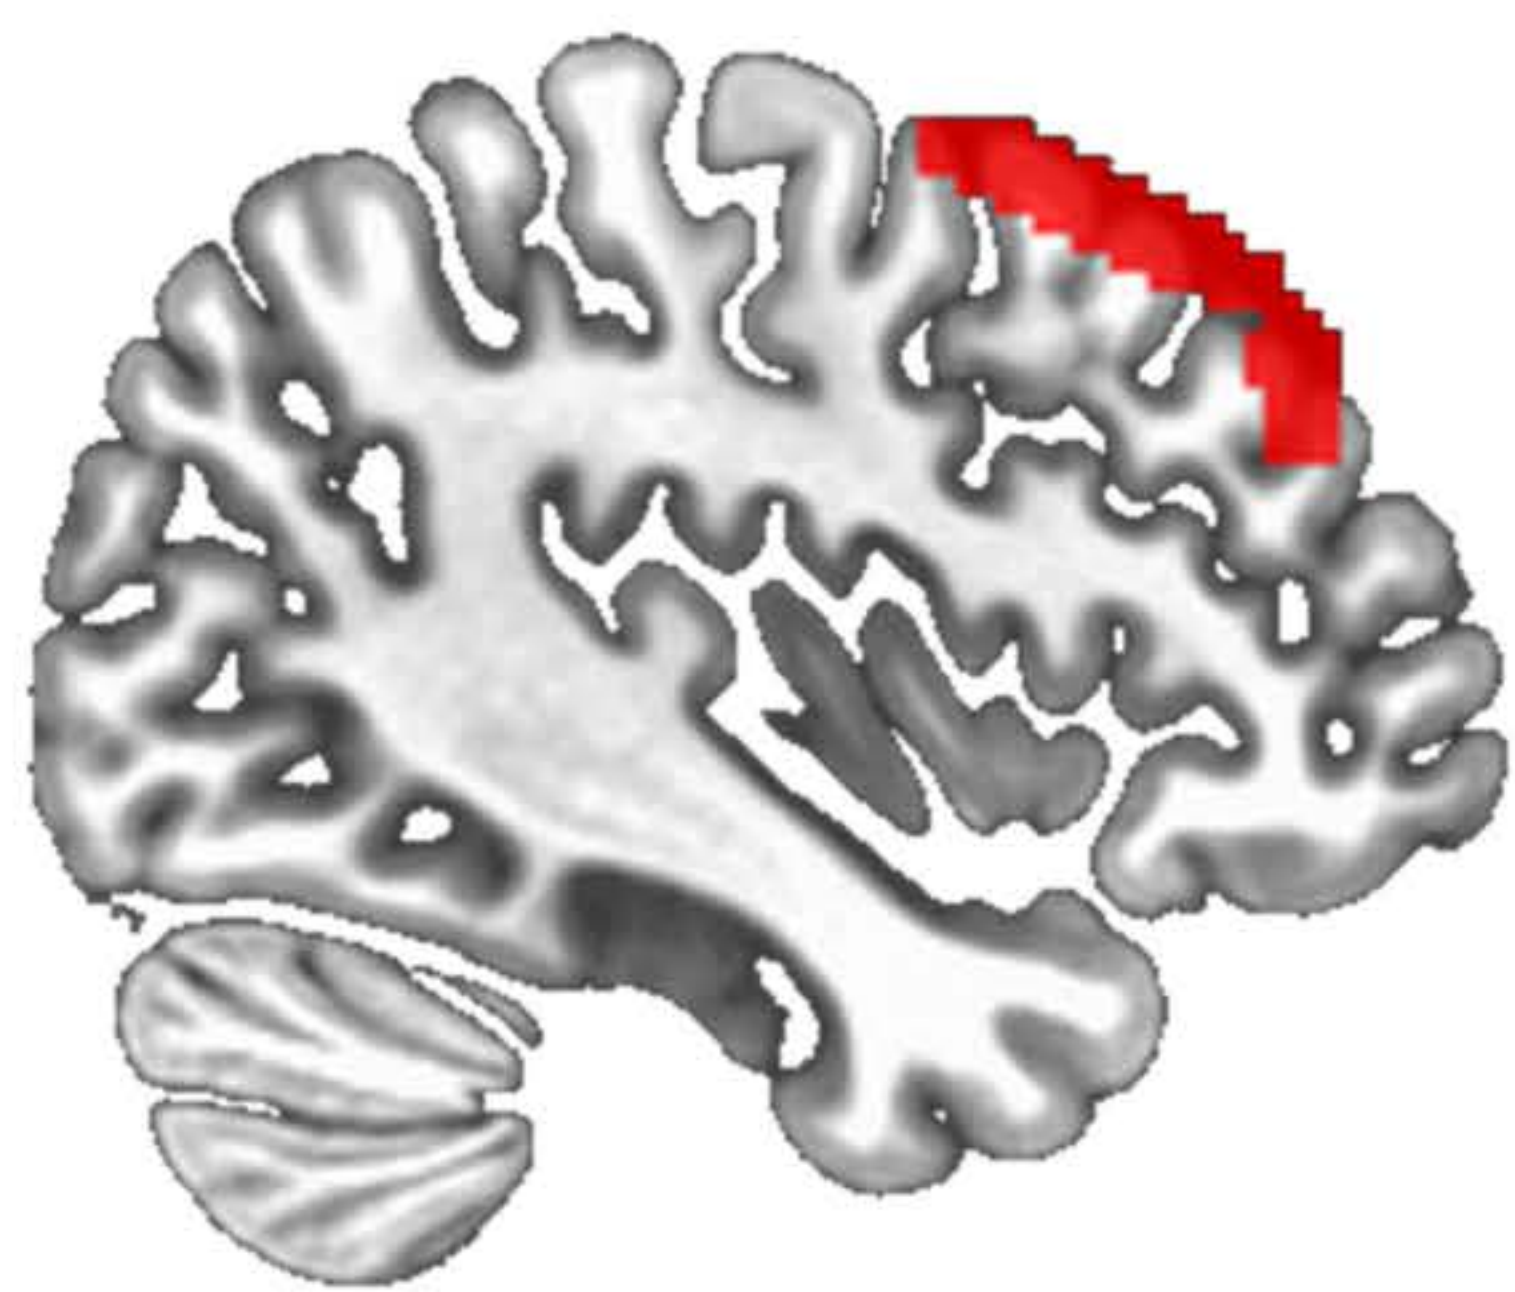



# NDARBK027PDF\_hamd\_right\_dlpfc

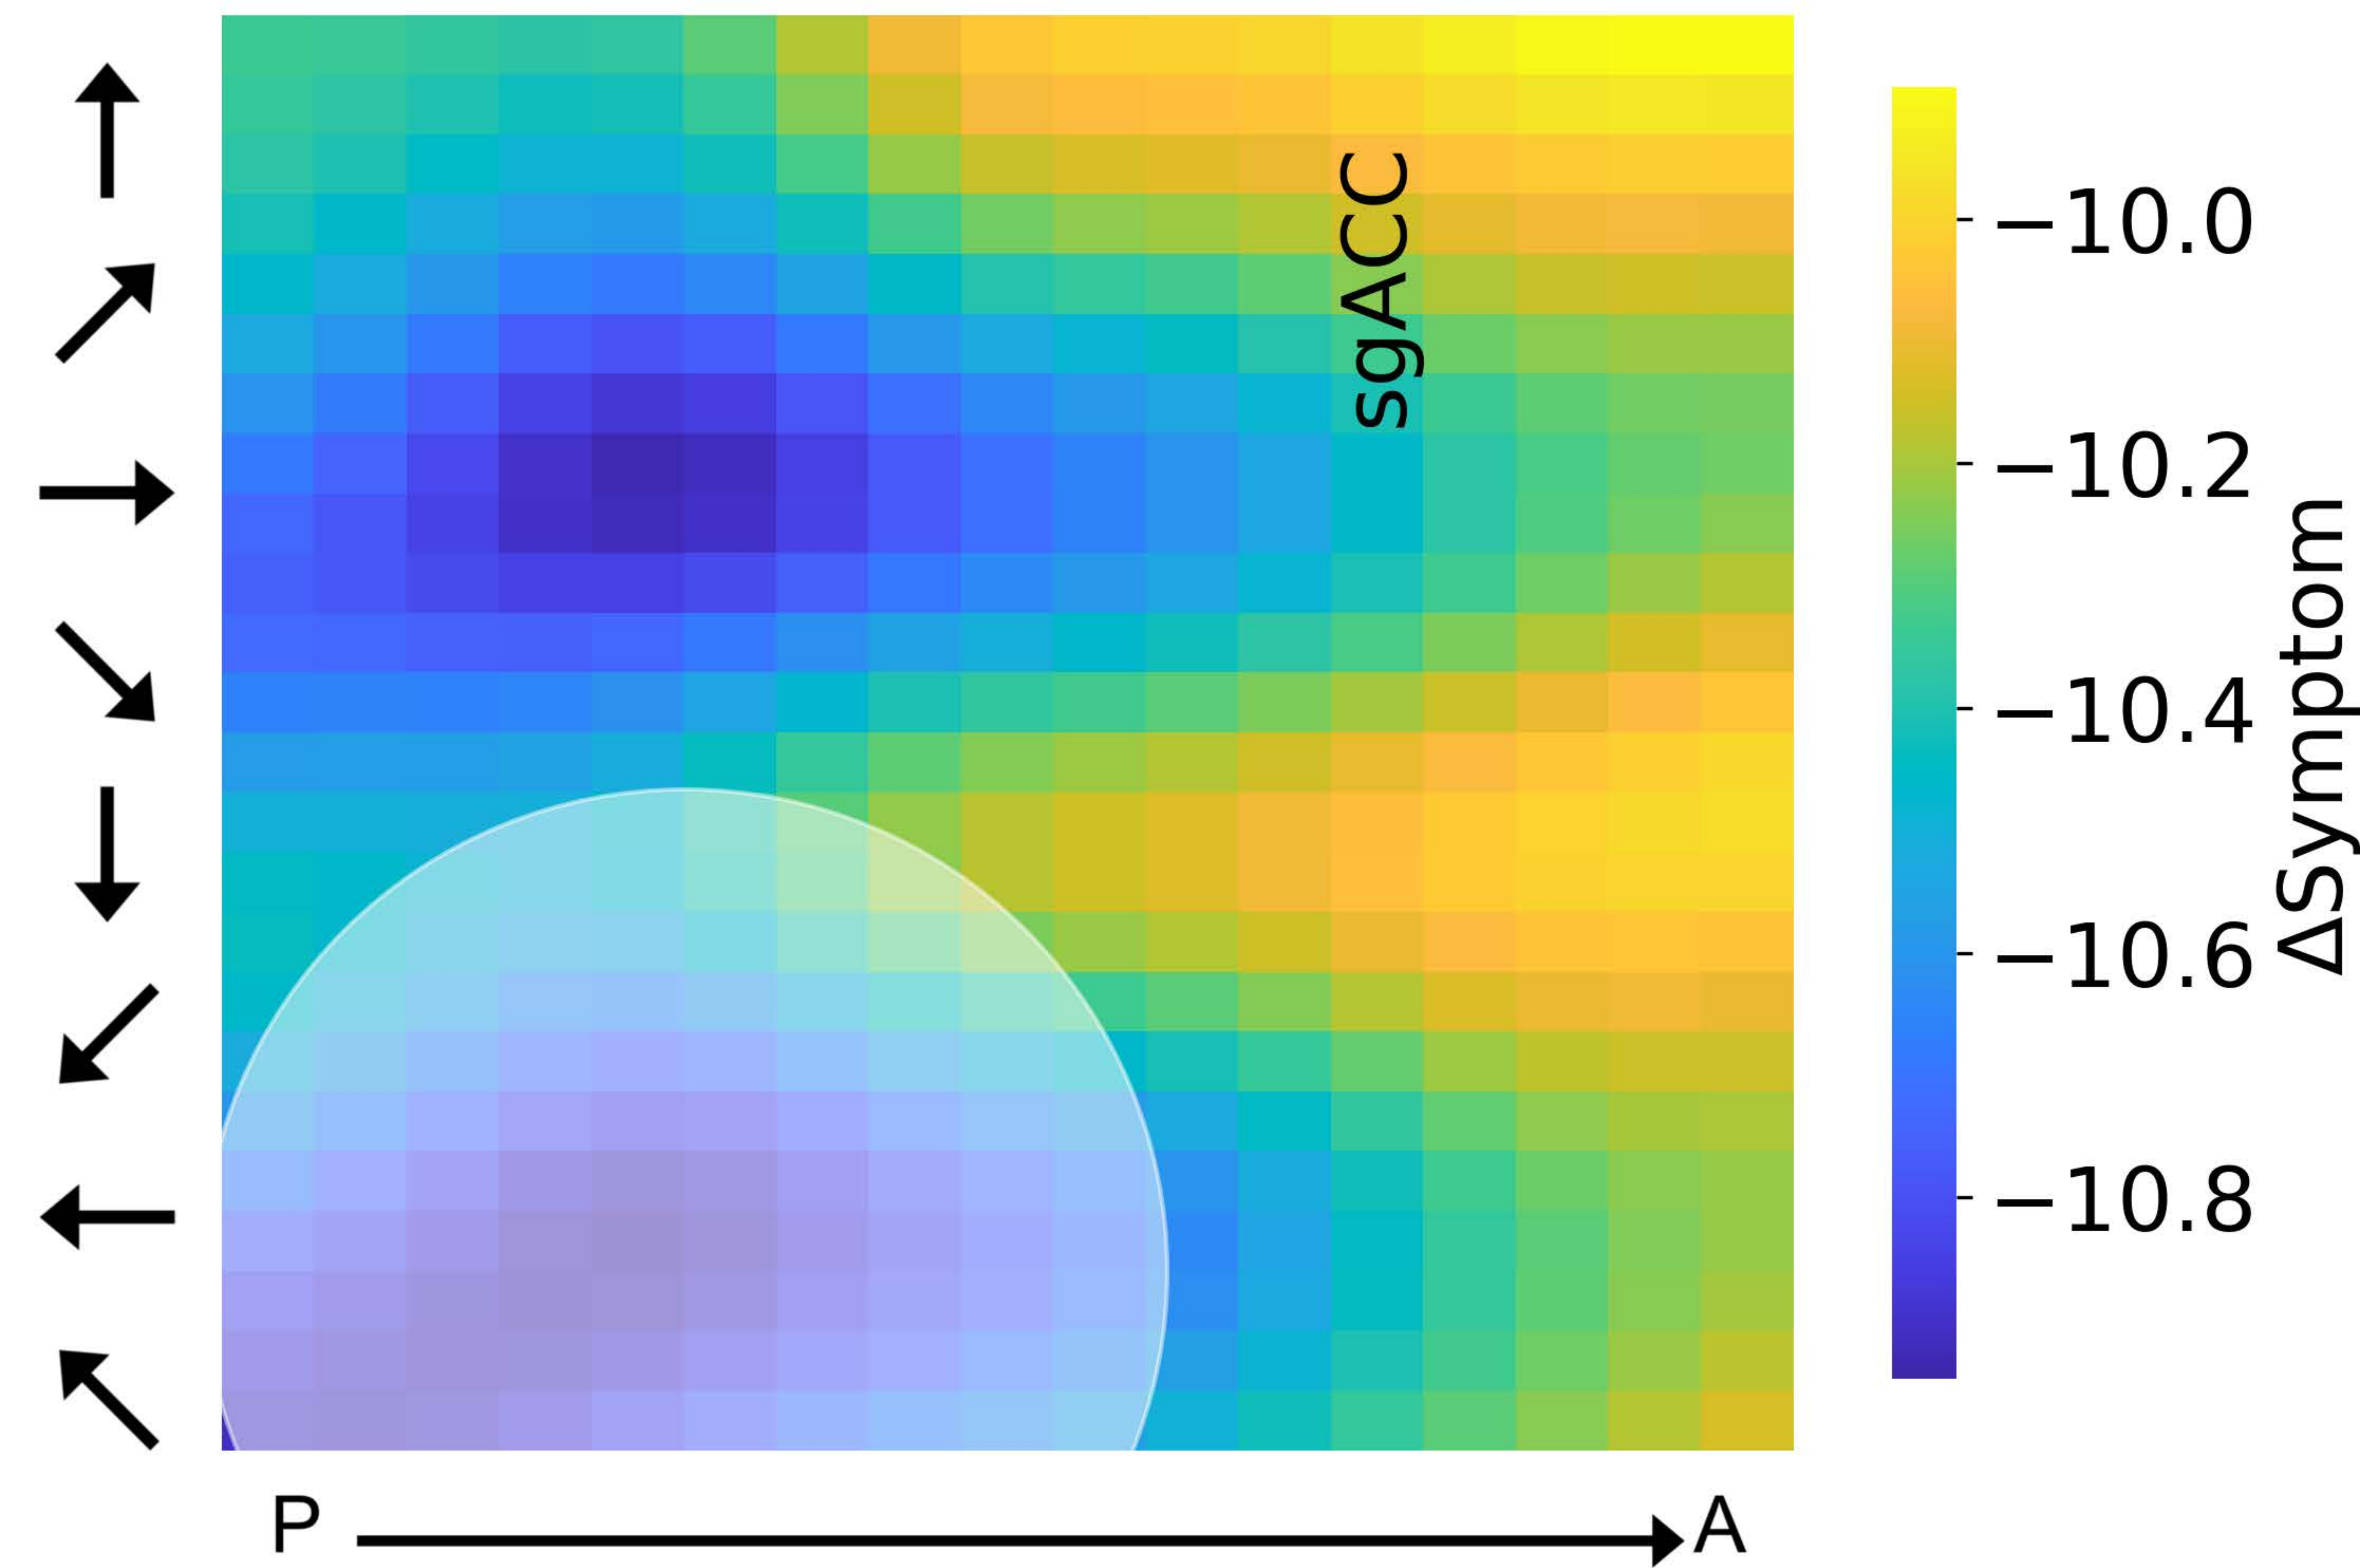



# NDARBL814BJK\_hamd\_right\_dlpfc

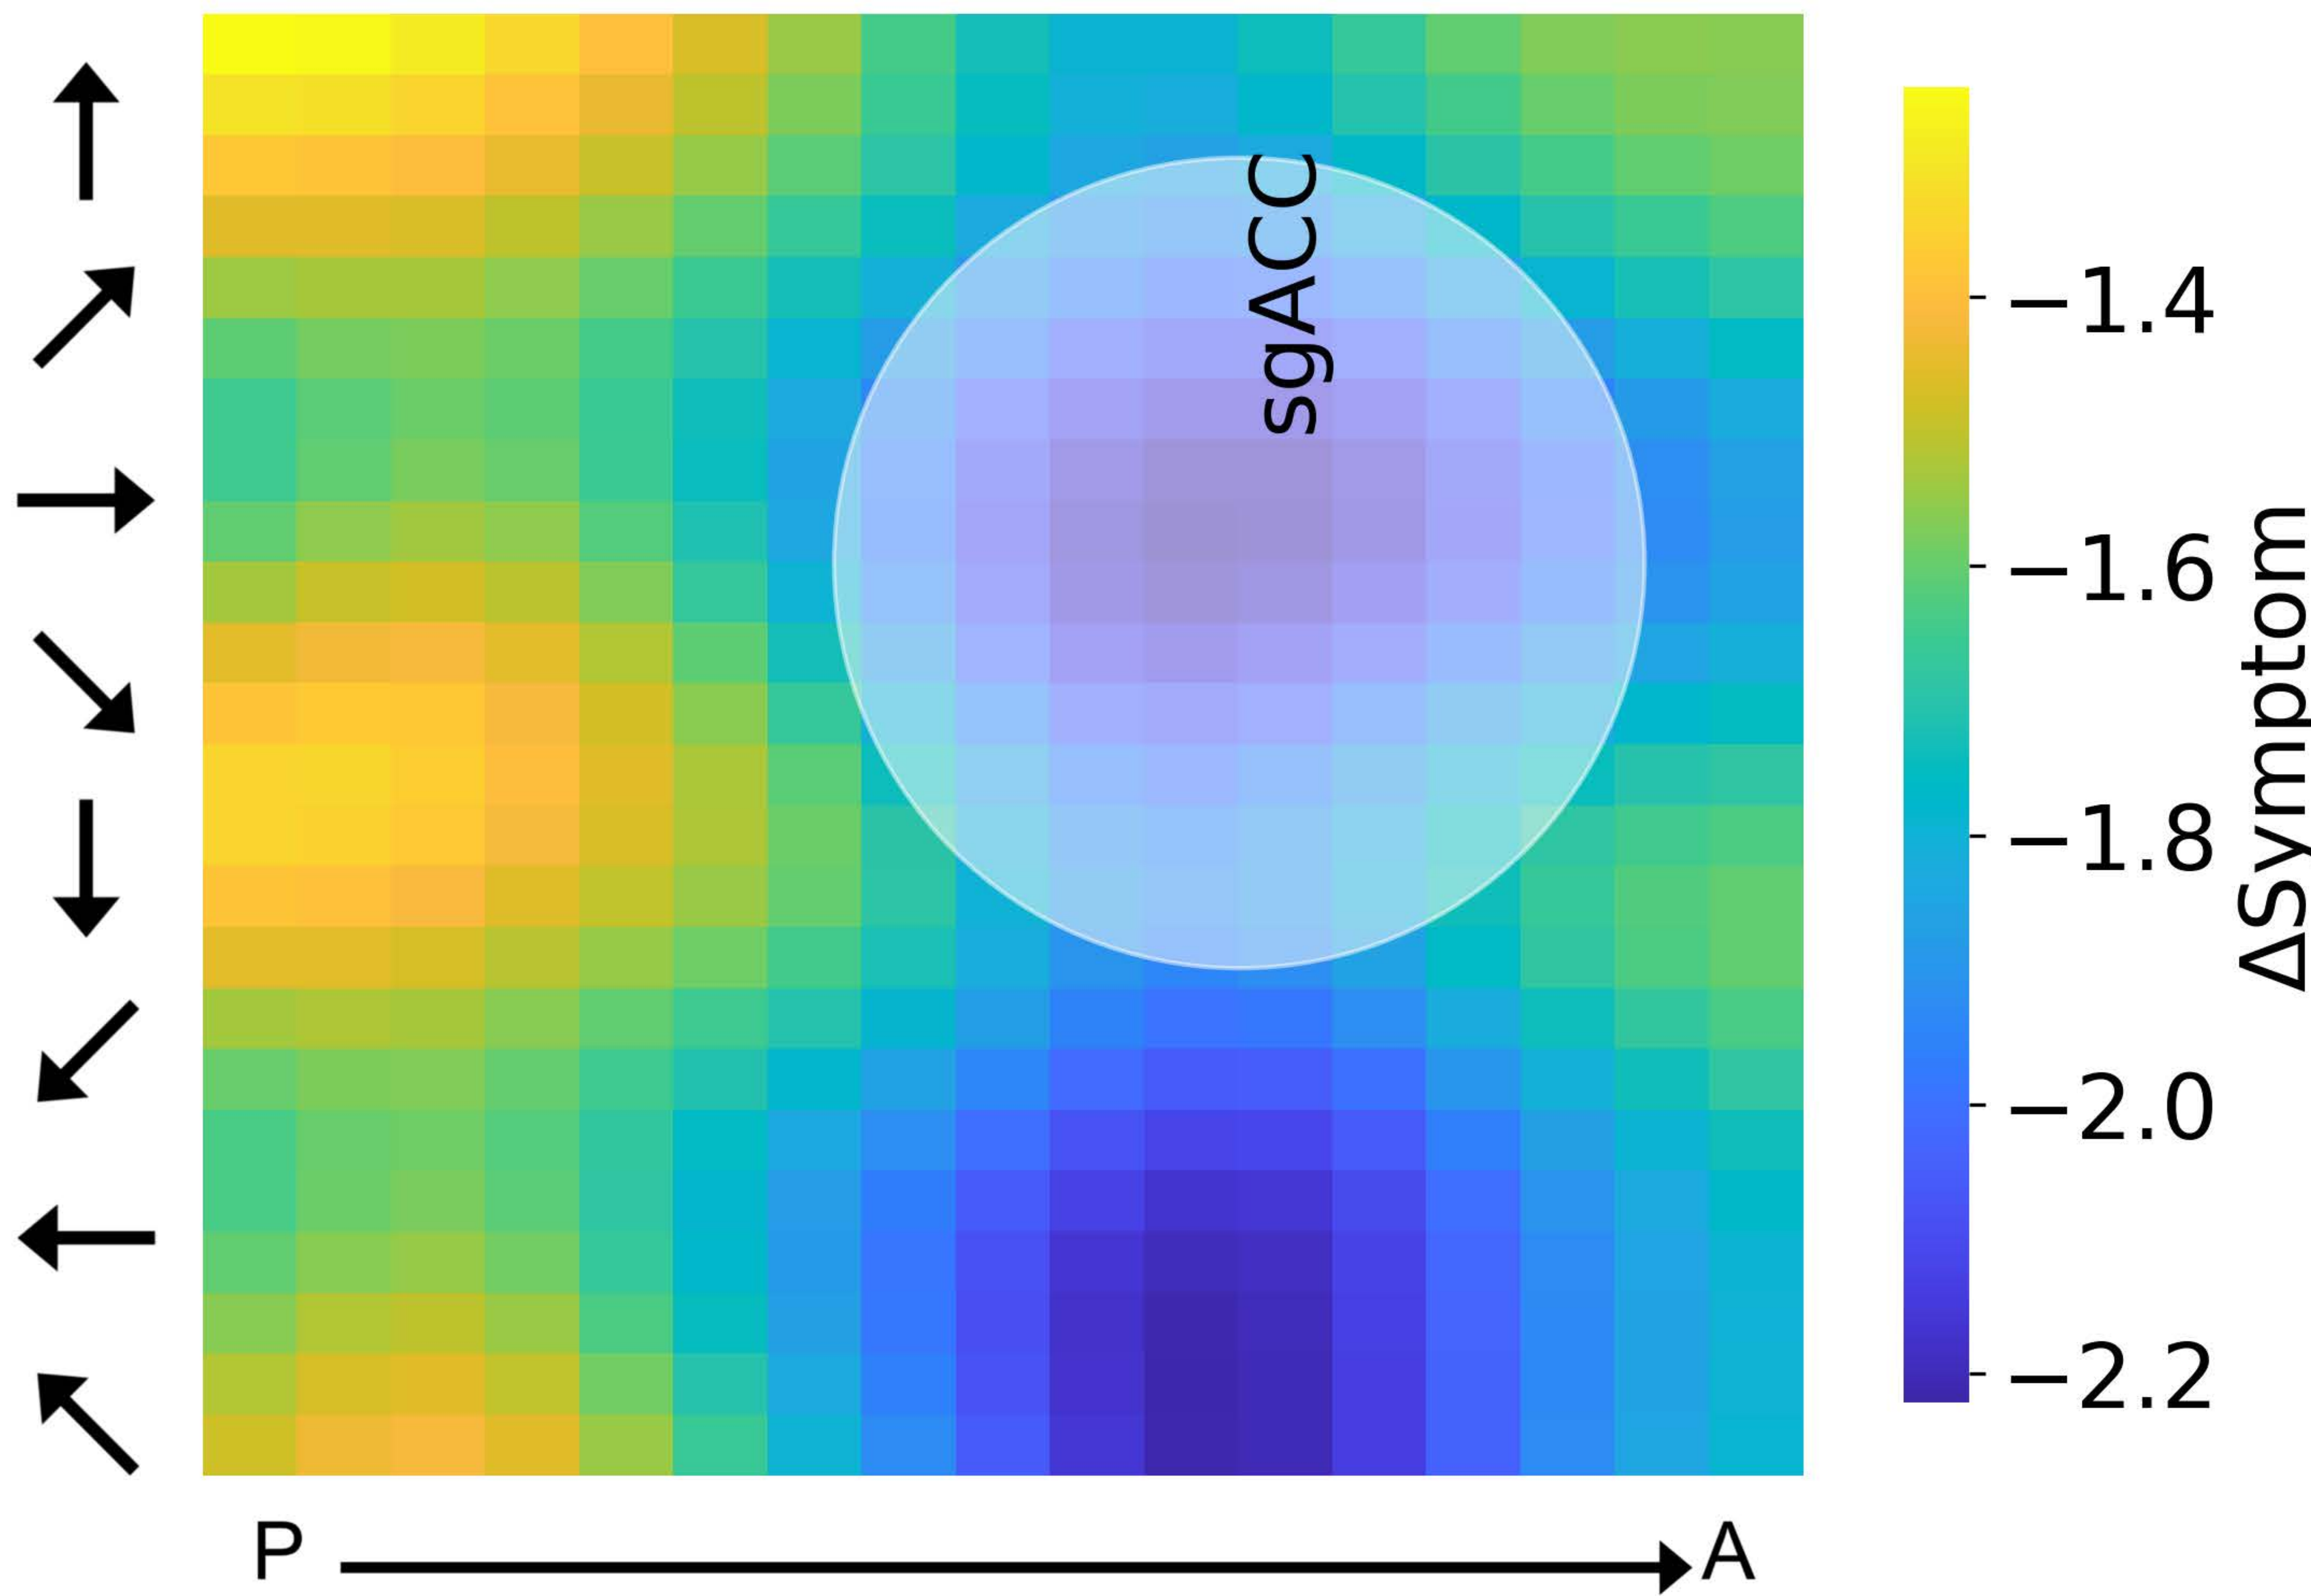



# NDARBP353XD2\_hamd\_right\_dlpfc

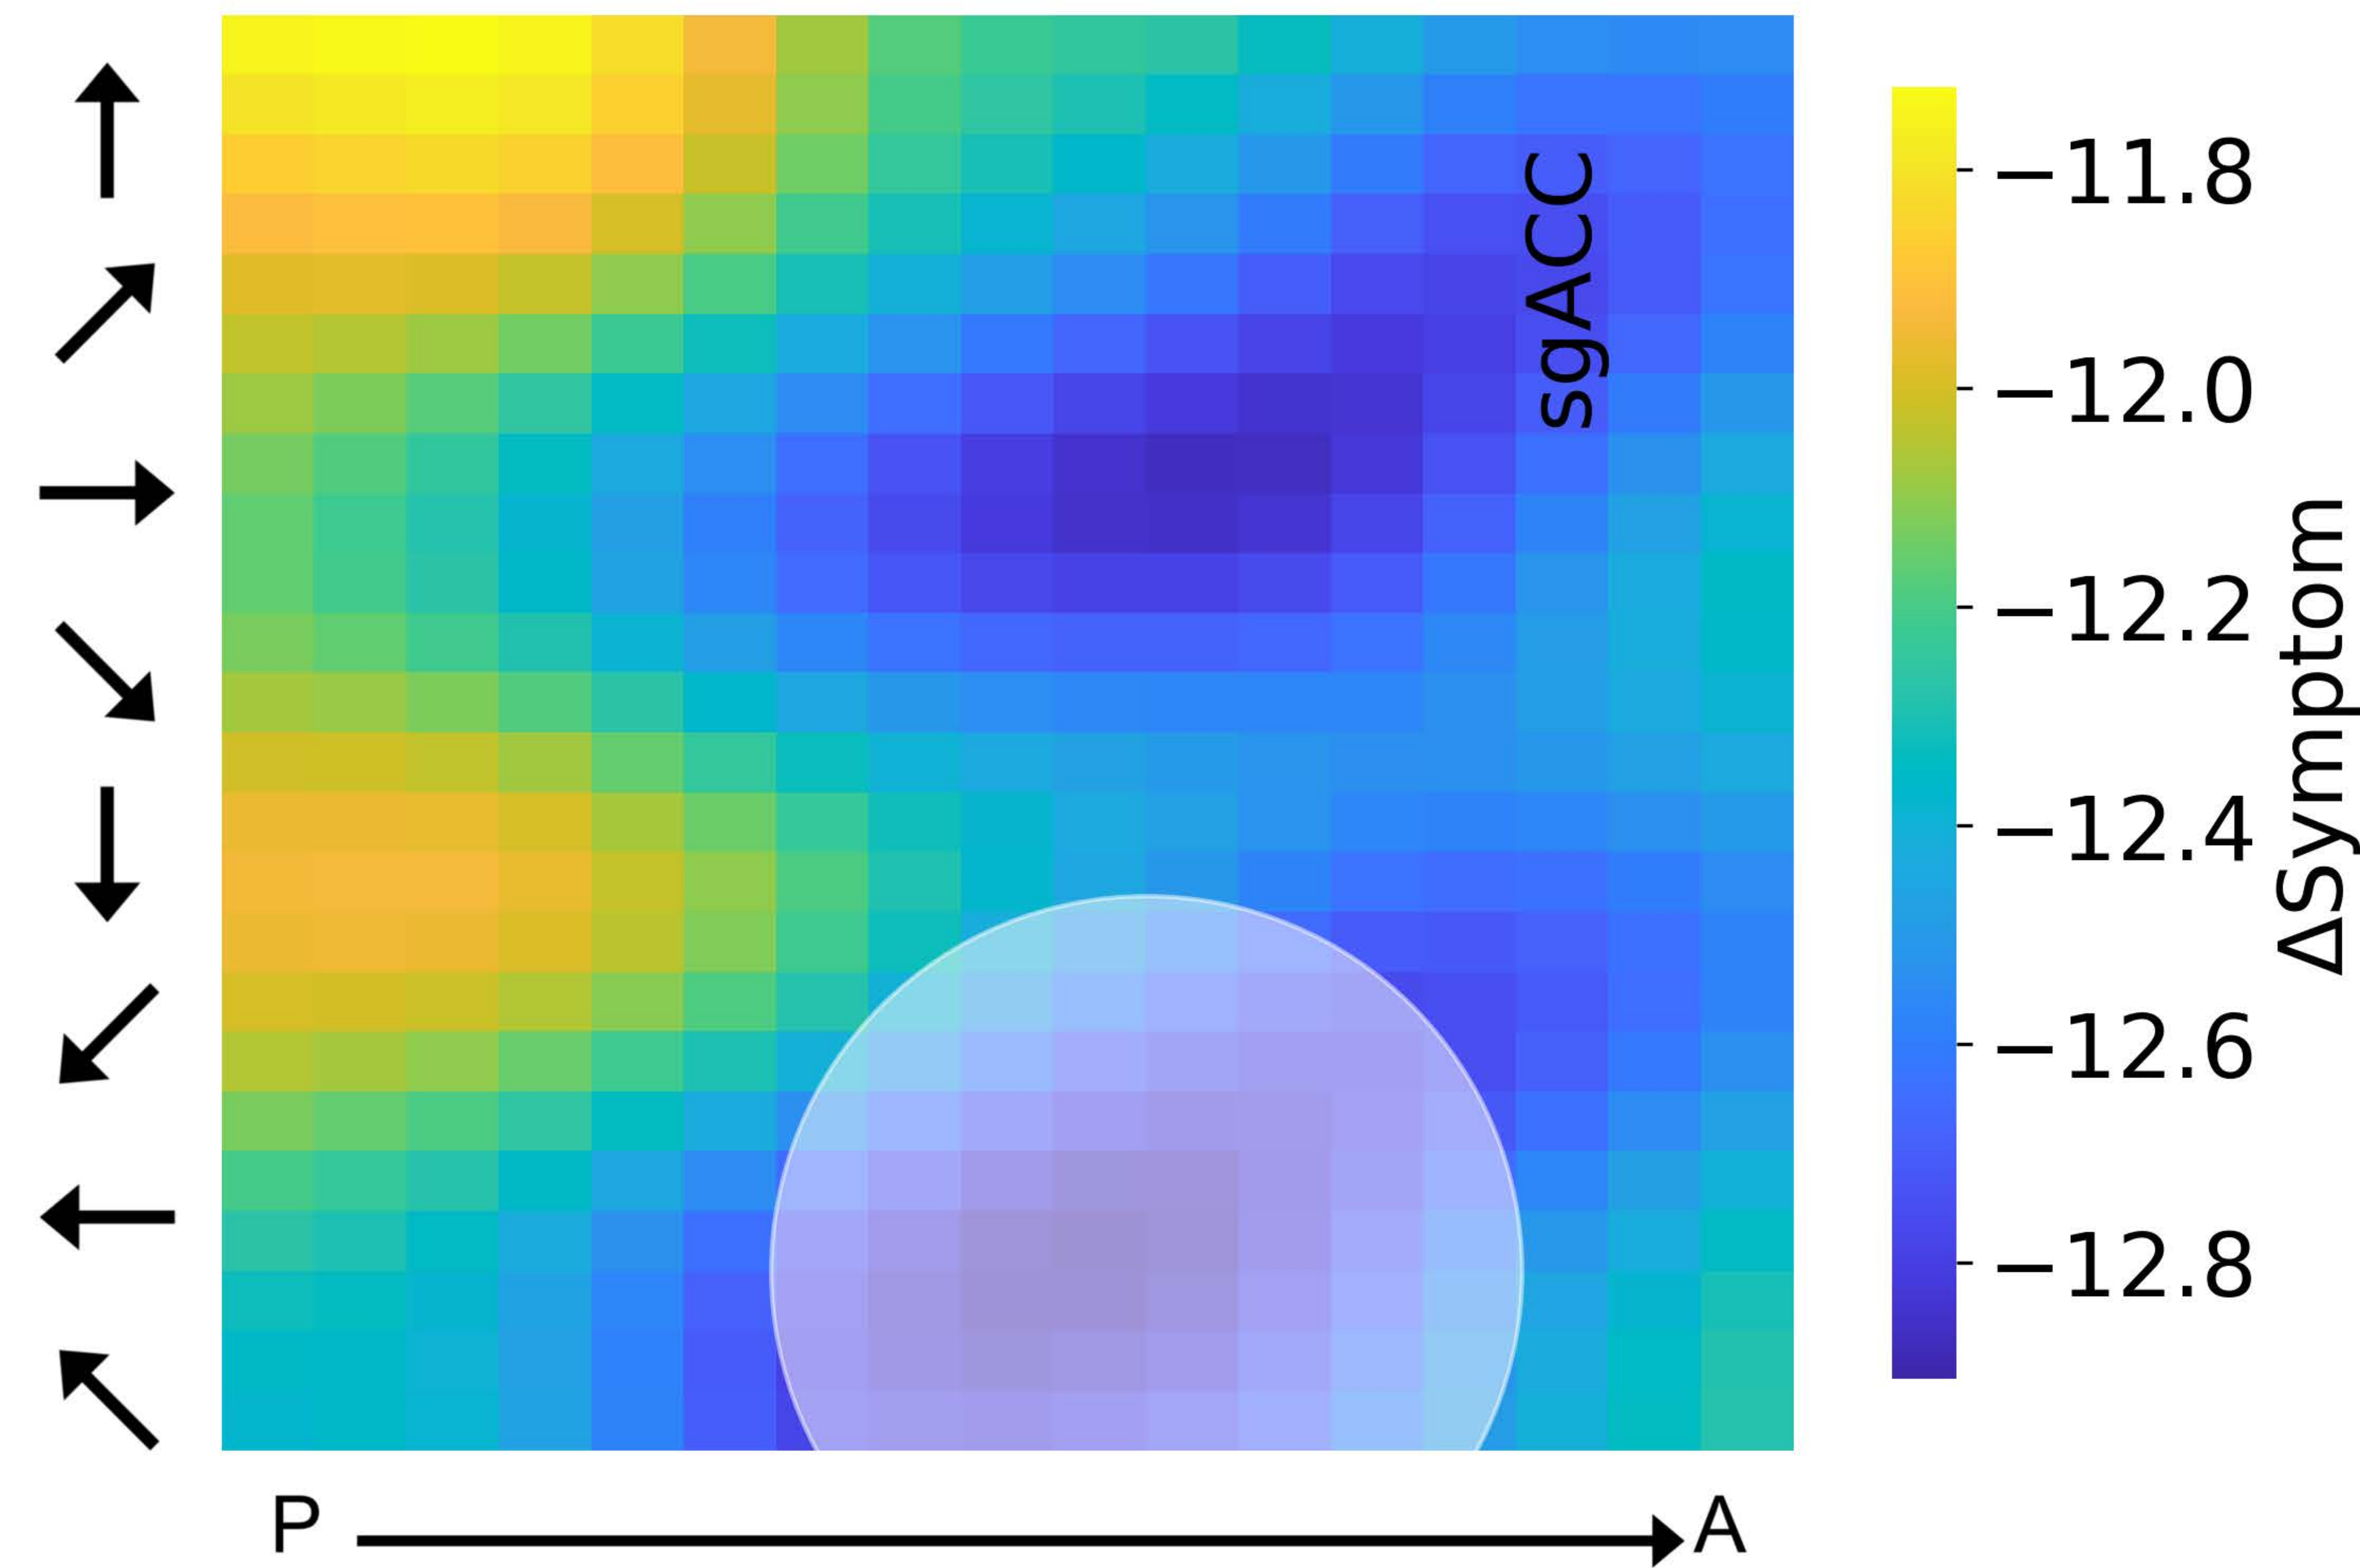



# NDARBT583XH6\_hamd\_right\_dlpfc

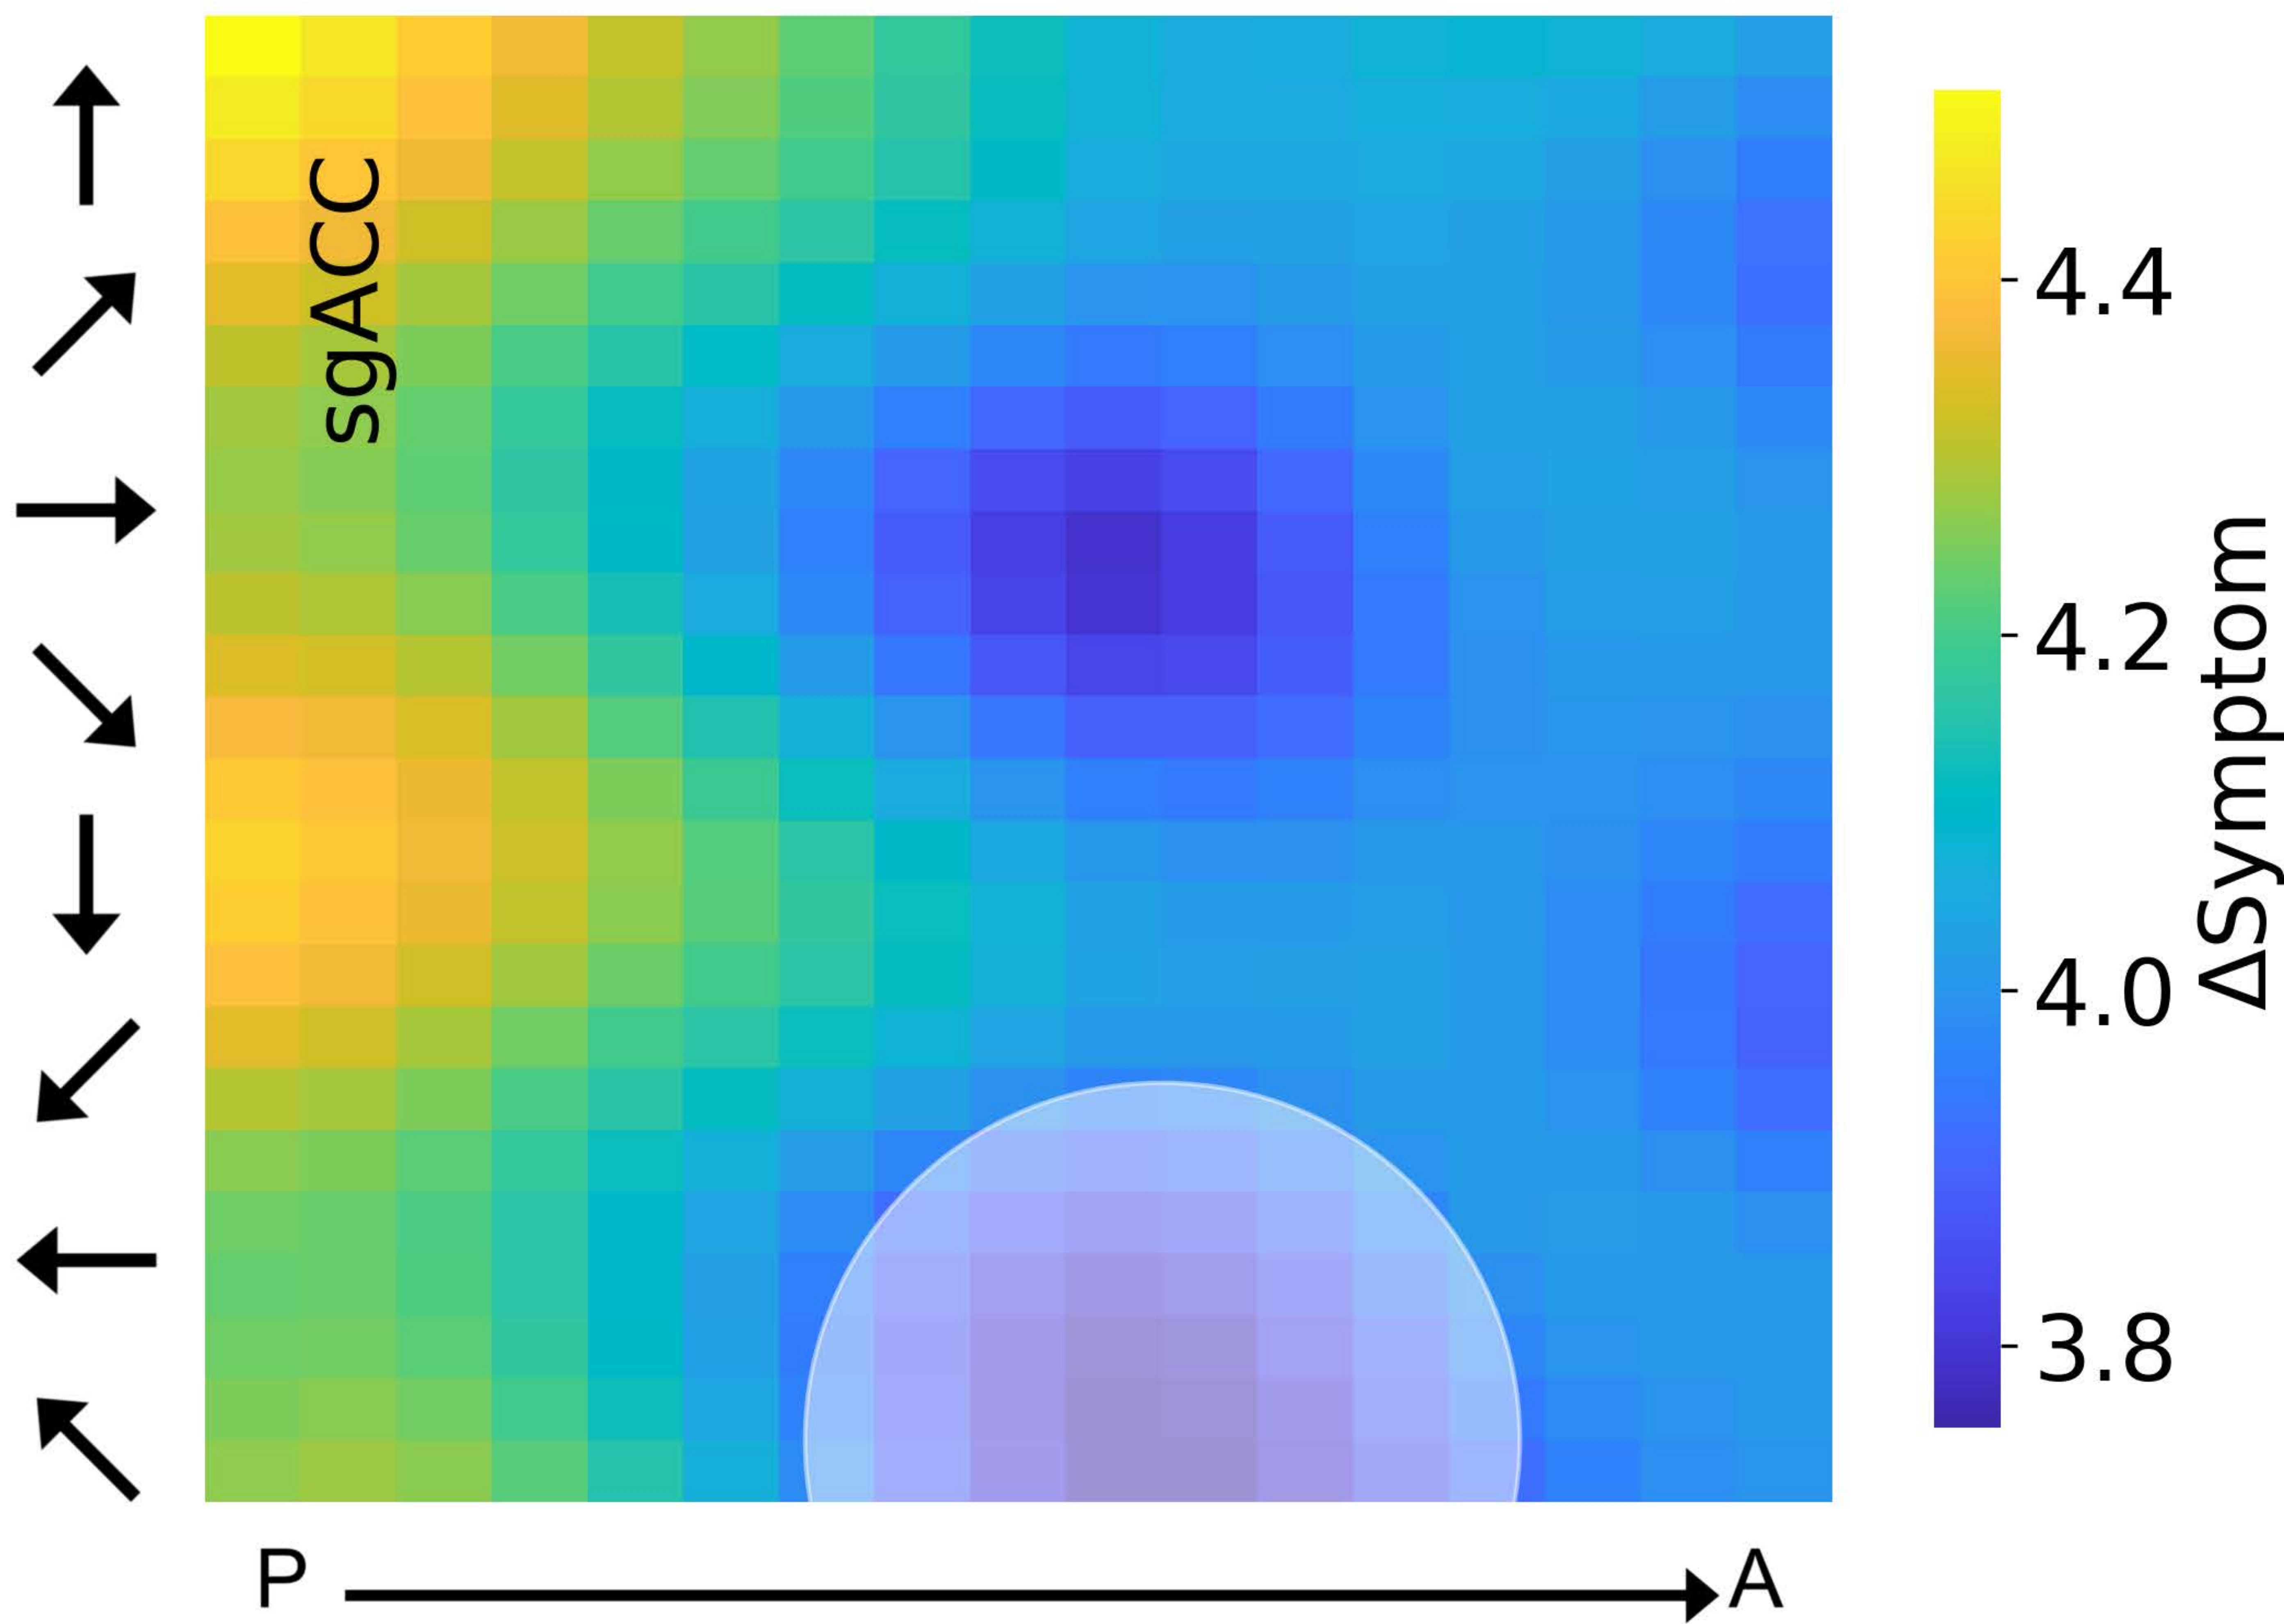



# INDARCG071YN8\_hamd\_right\_dlpfc

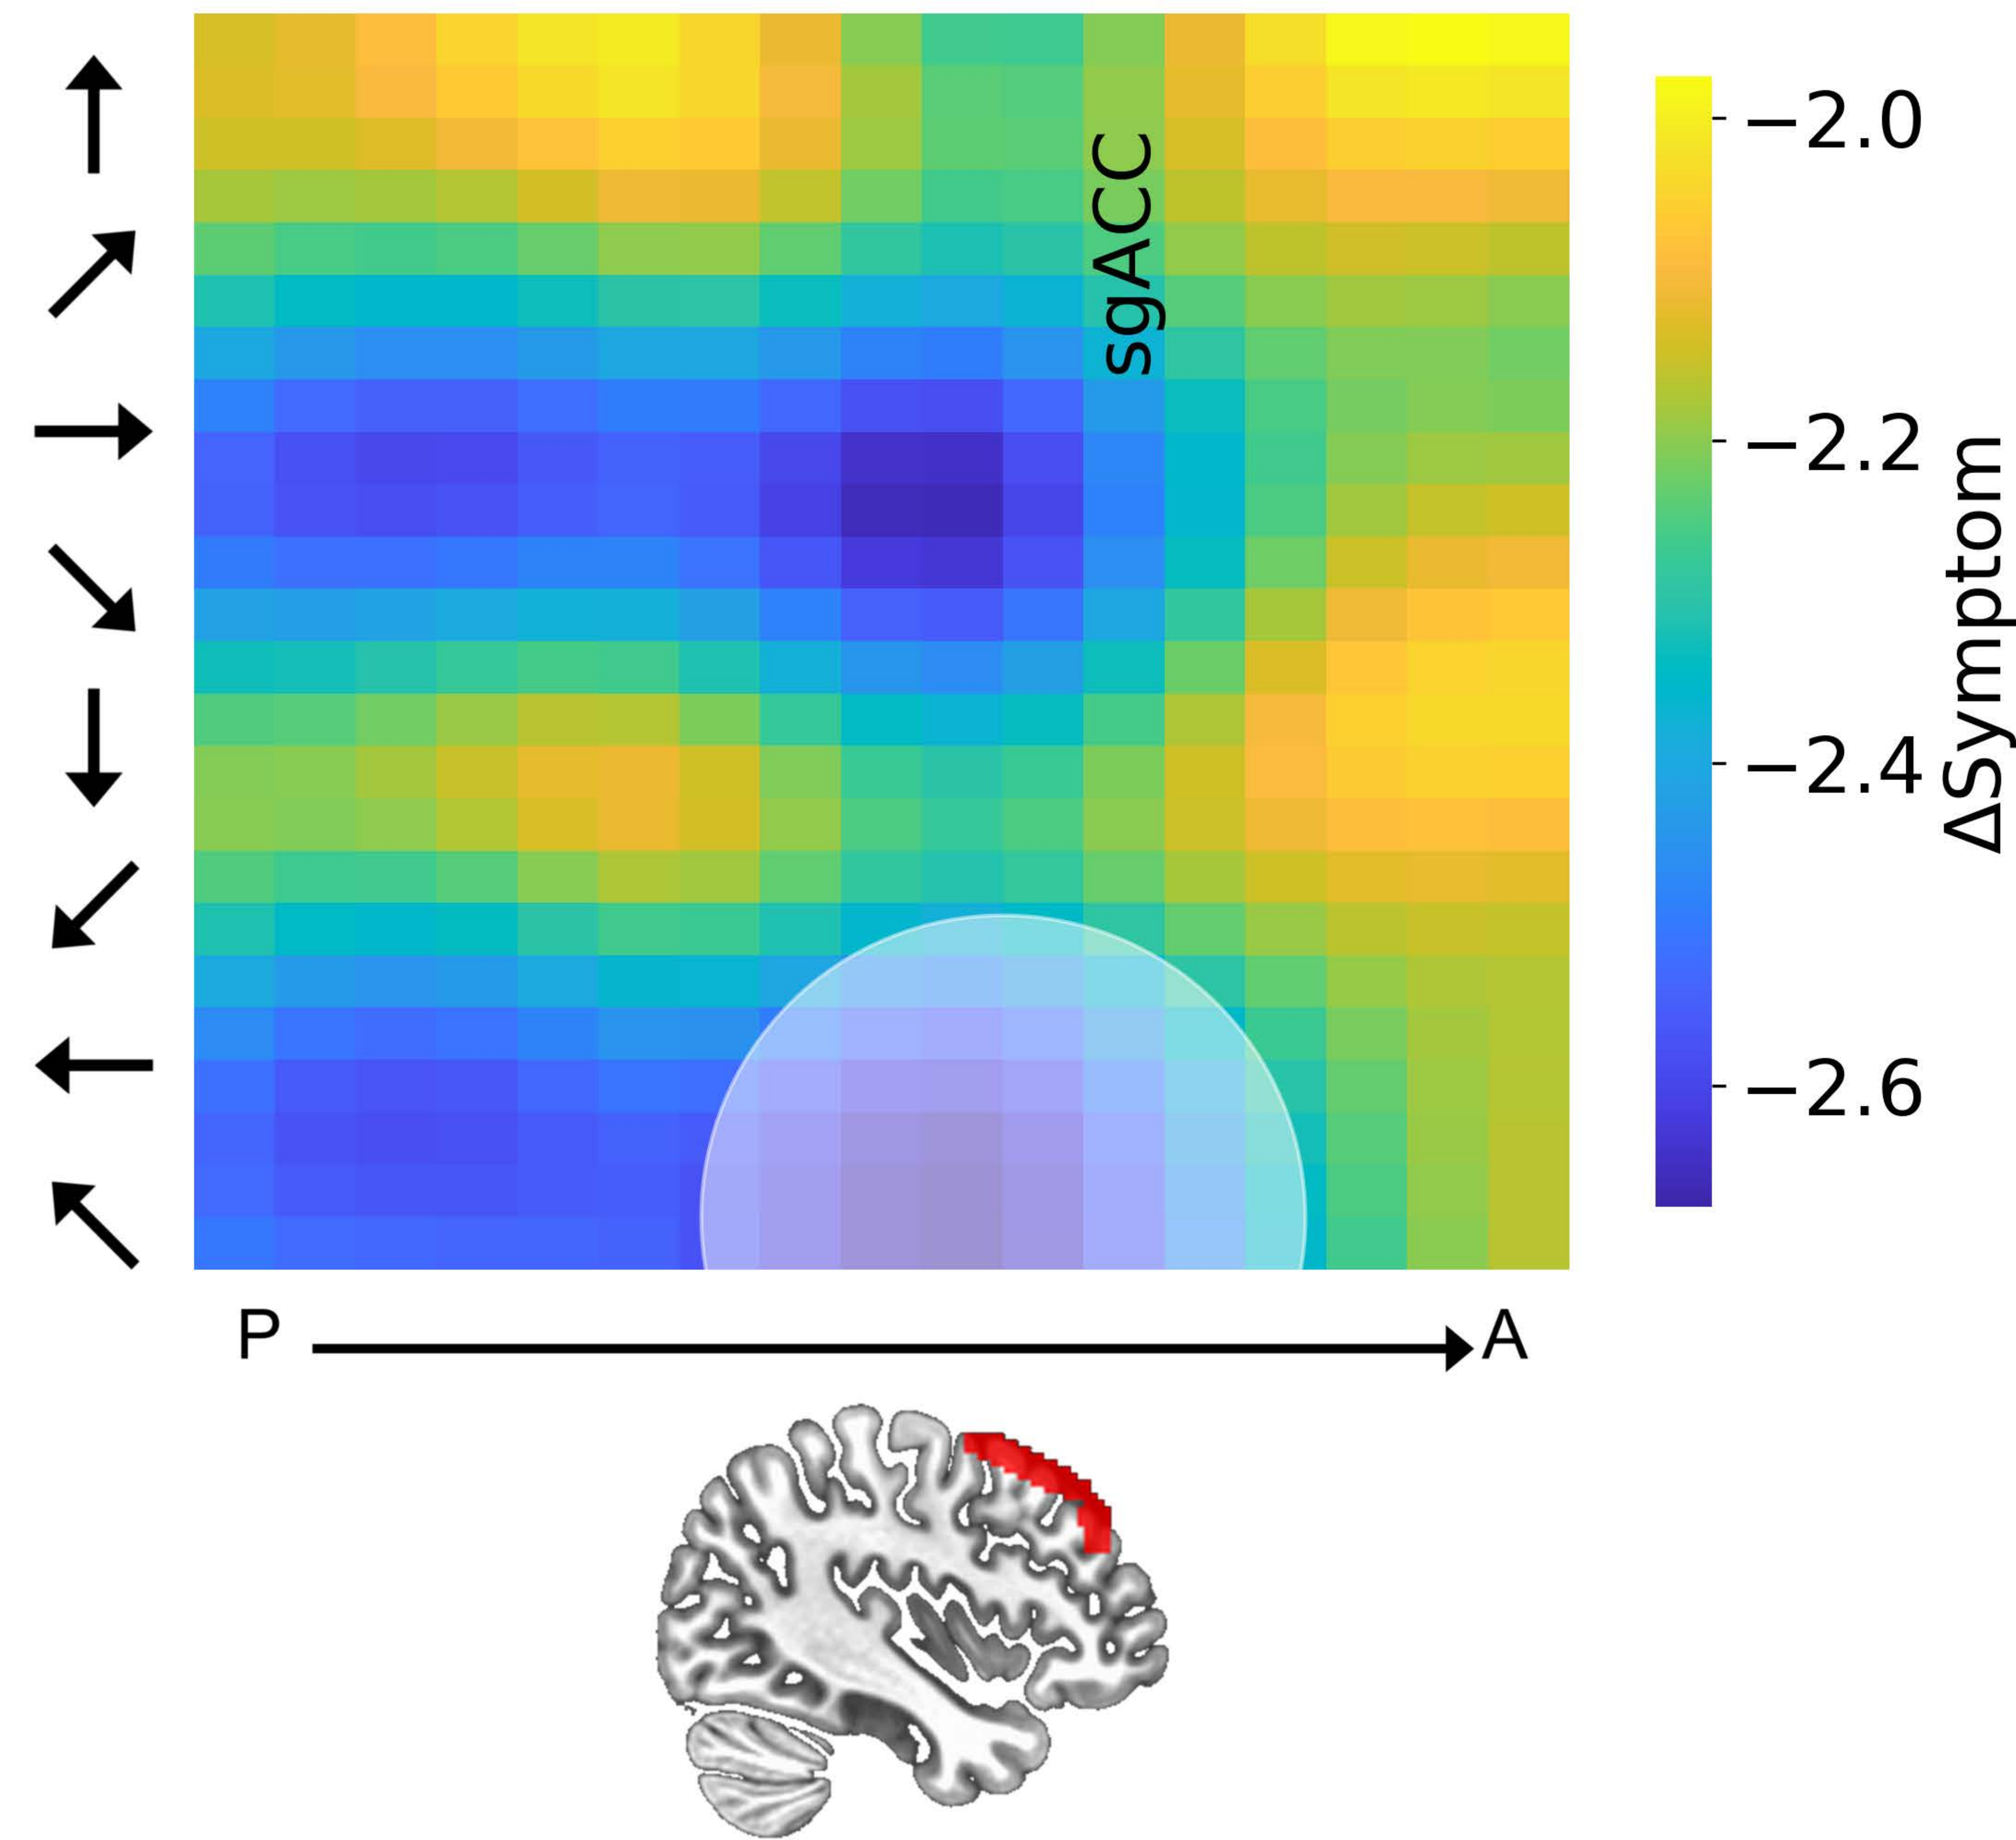



# INDARCG271VGC\_hamd\_right\_dlpfc

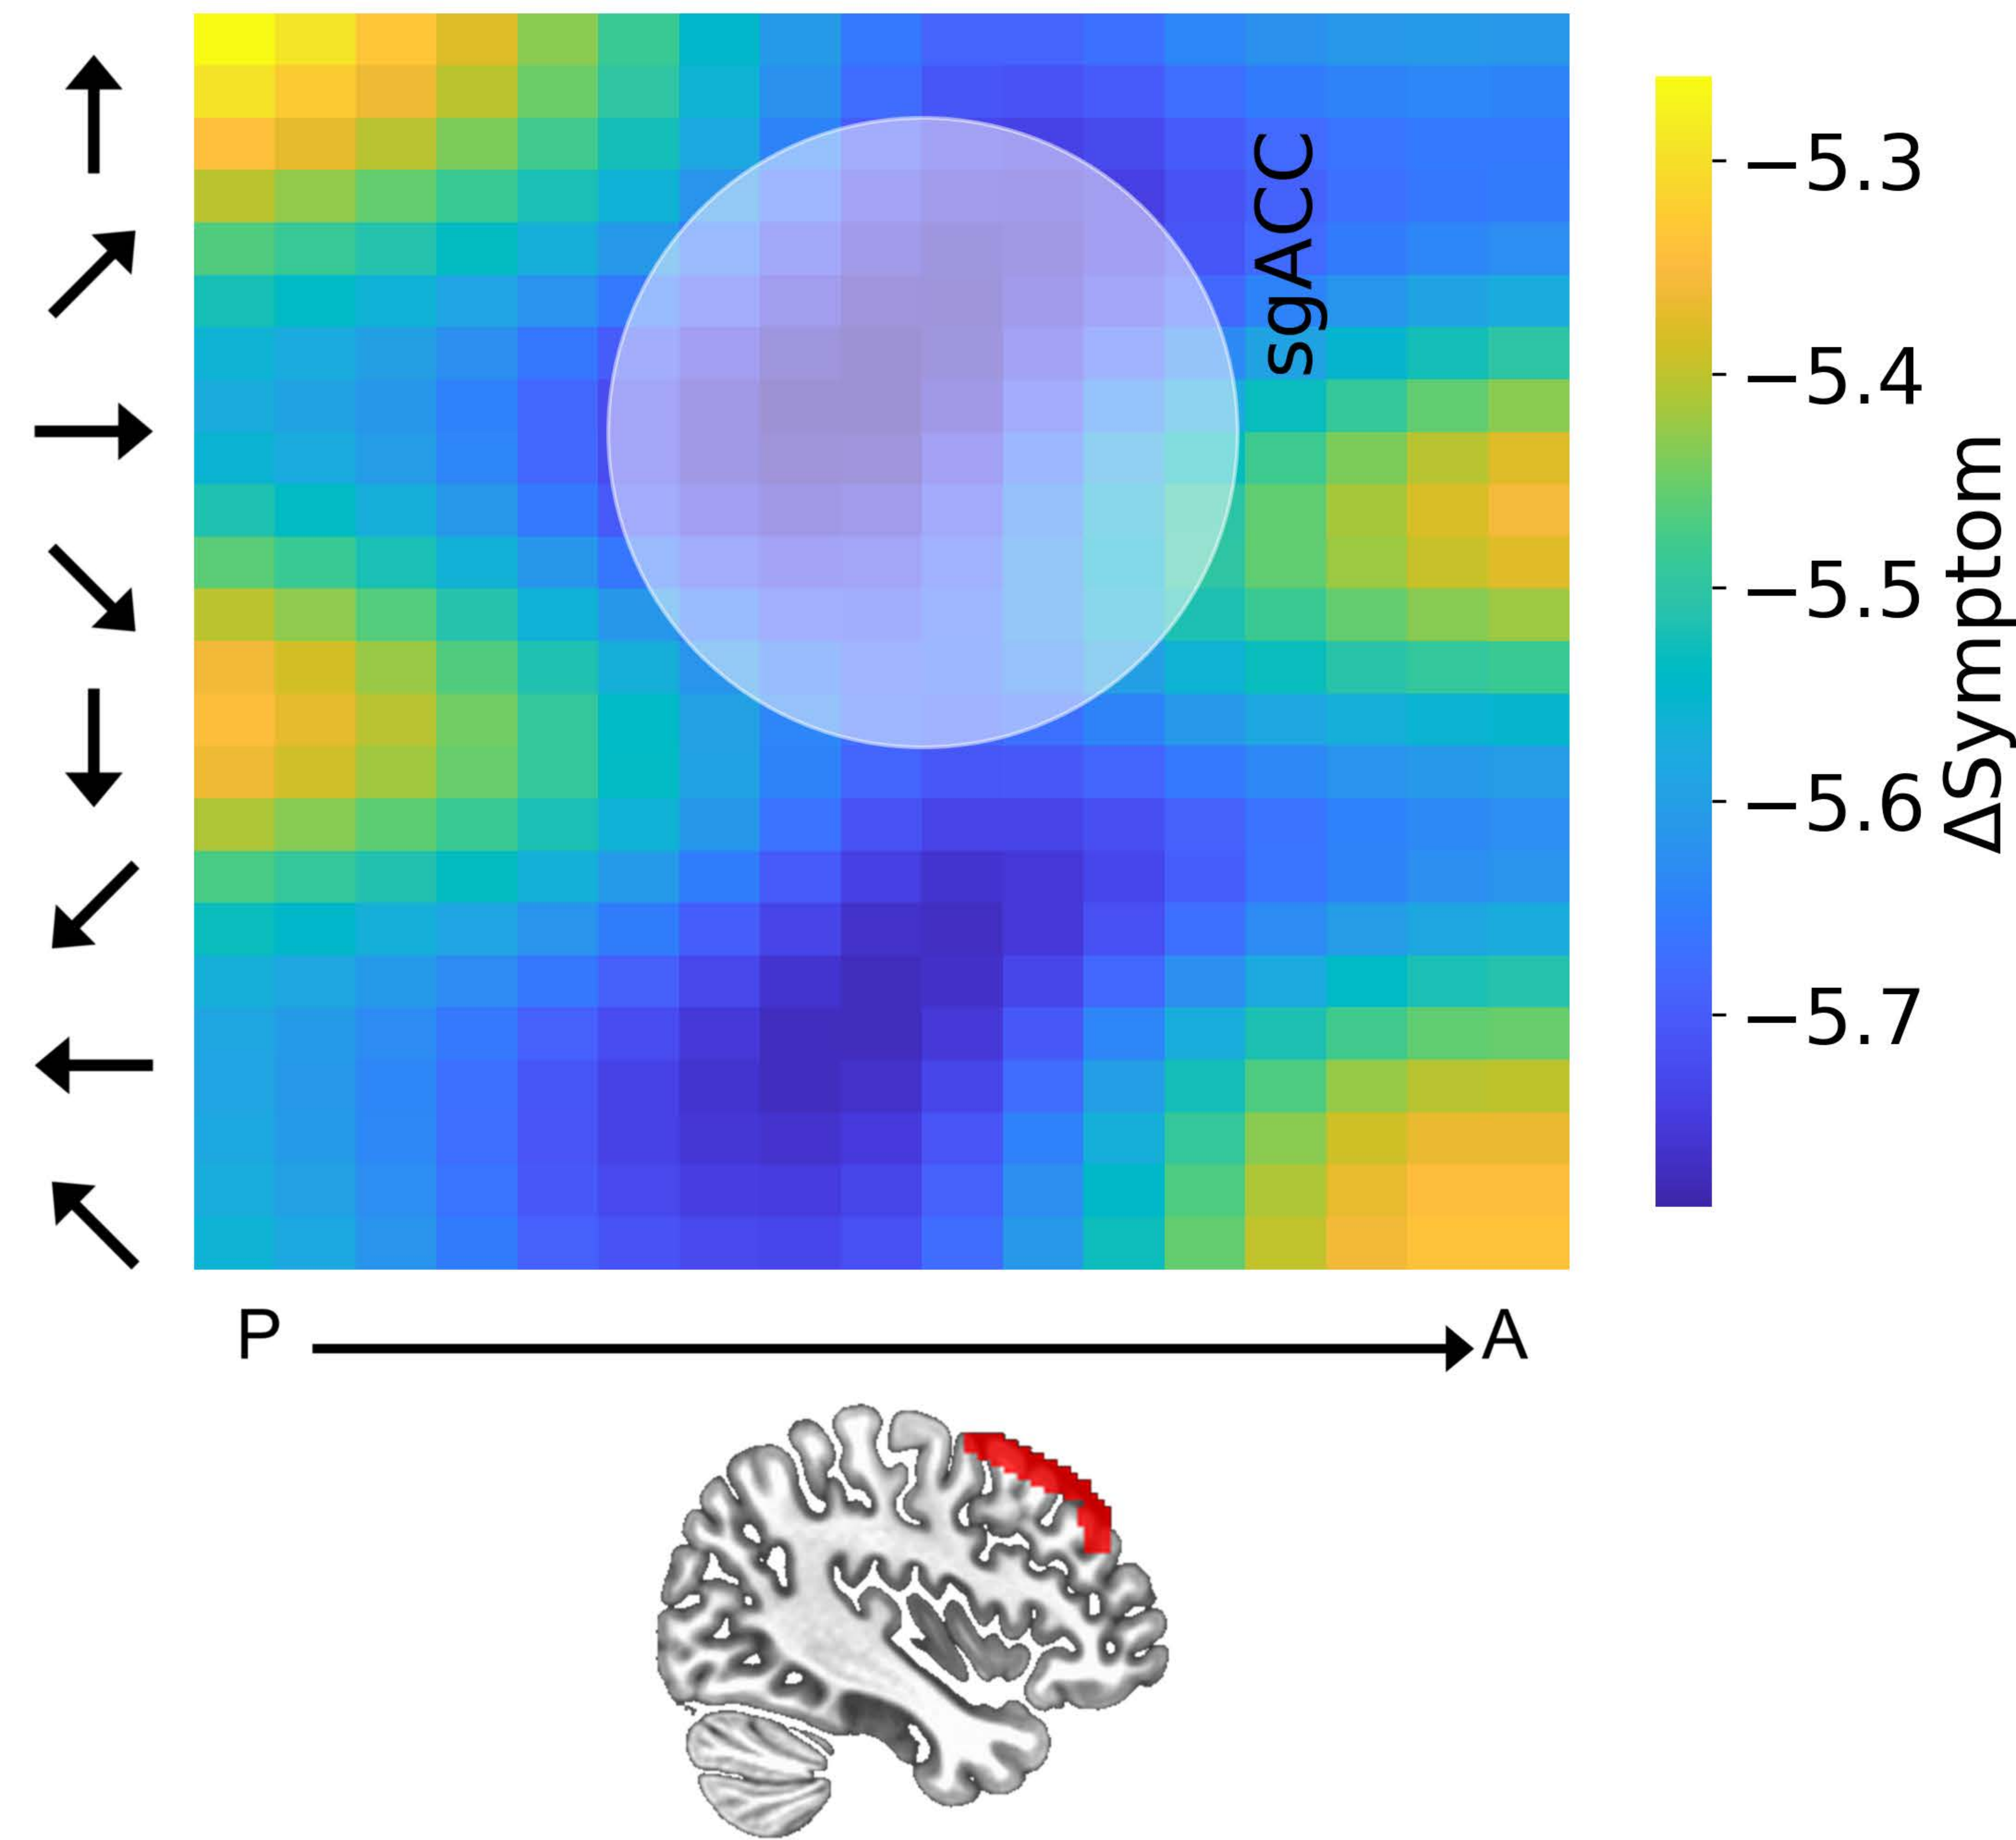



# INDARCM769WZL\_hamd\_right\_dlpfc

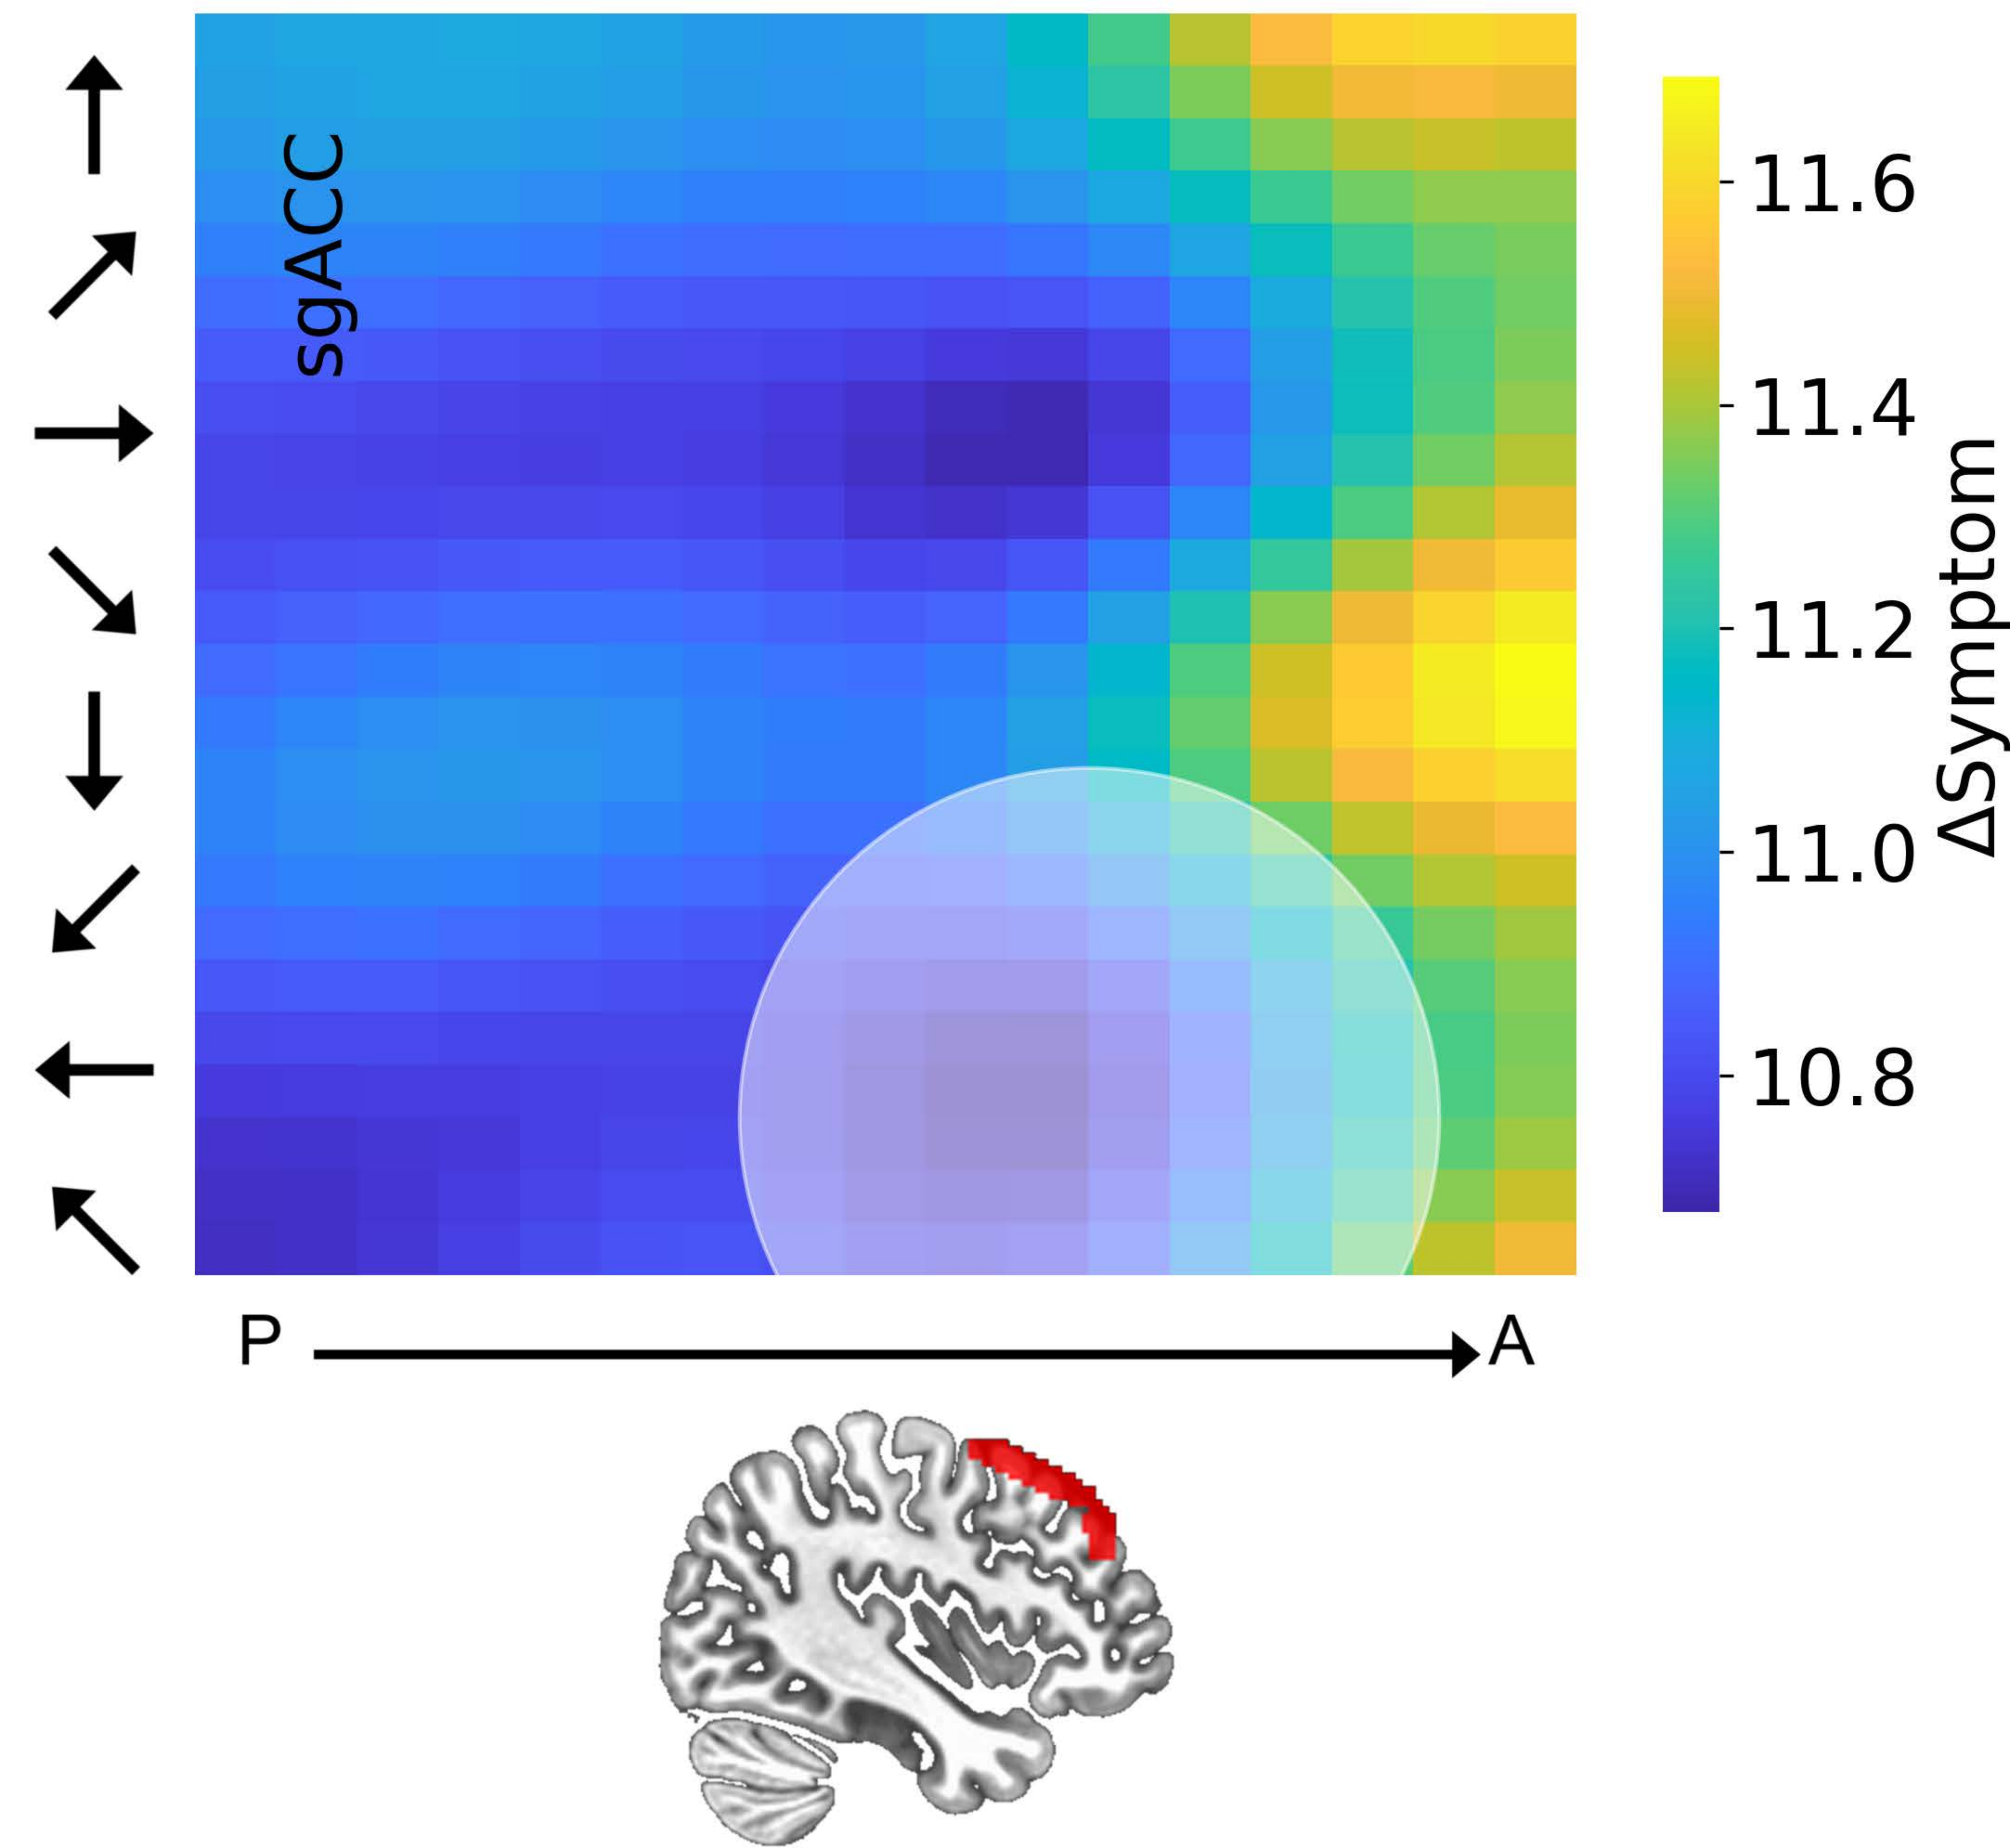



# NDARDL291XT0\_hamd\_right\_dlpfc

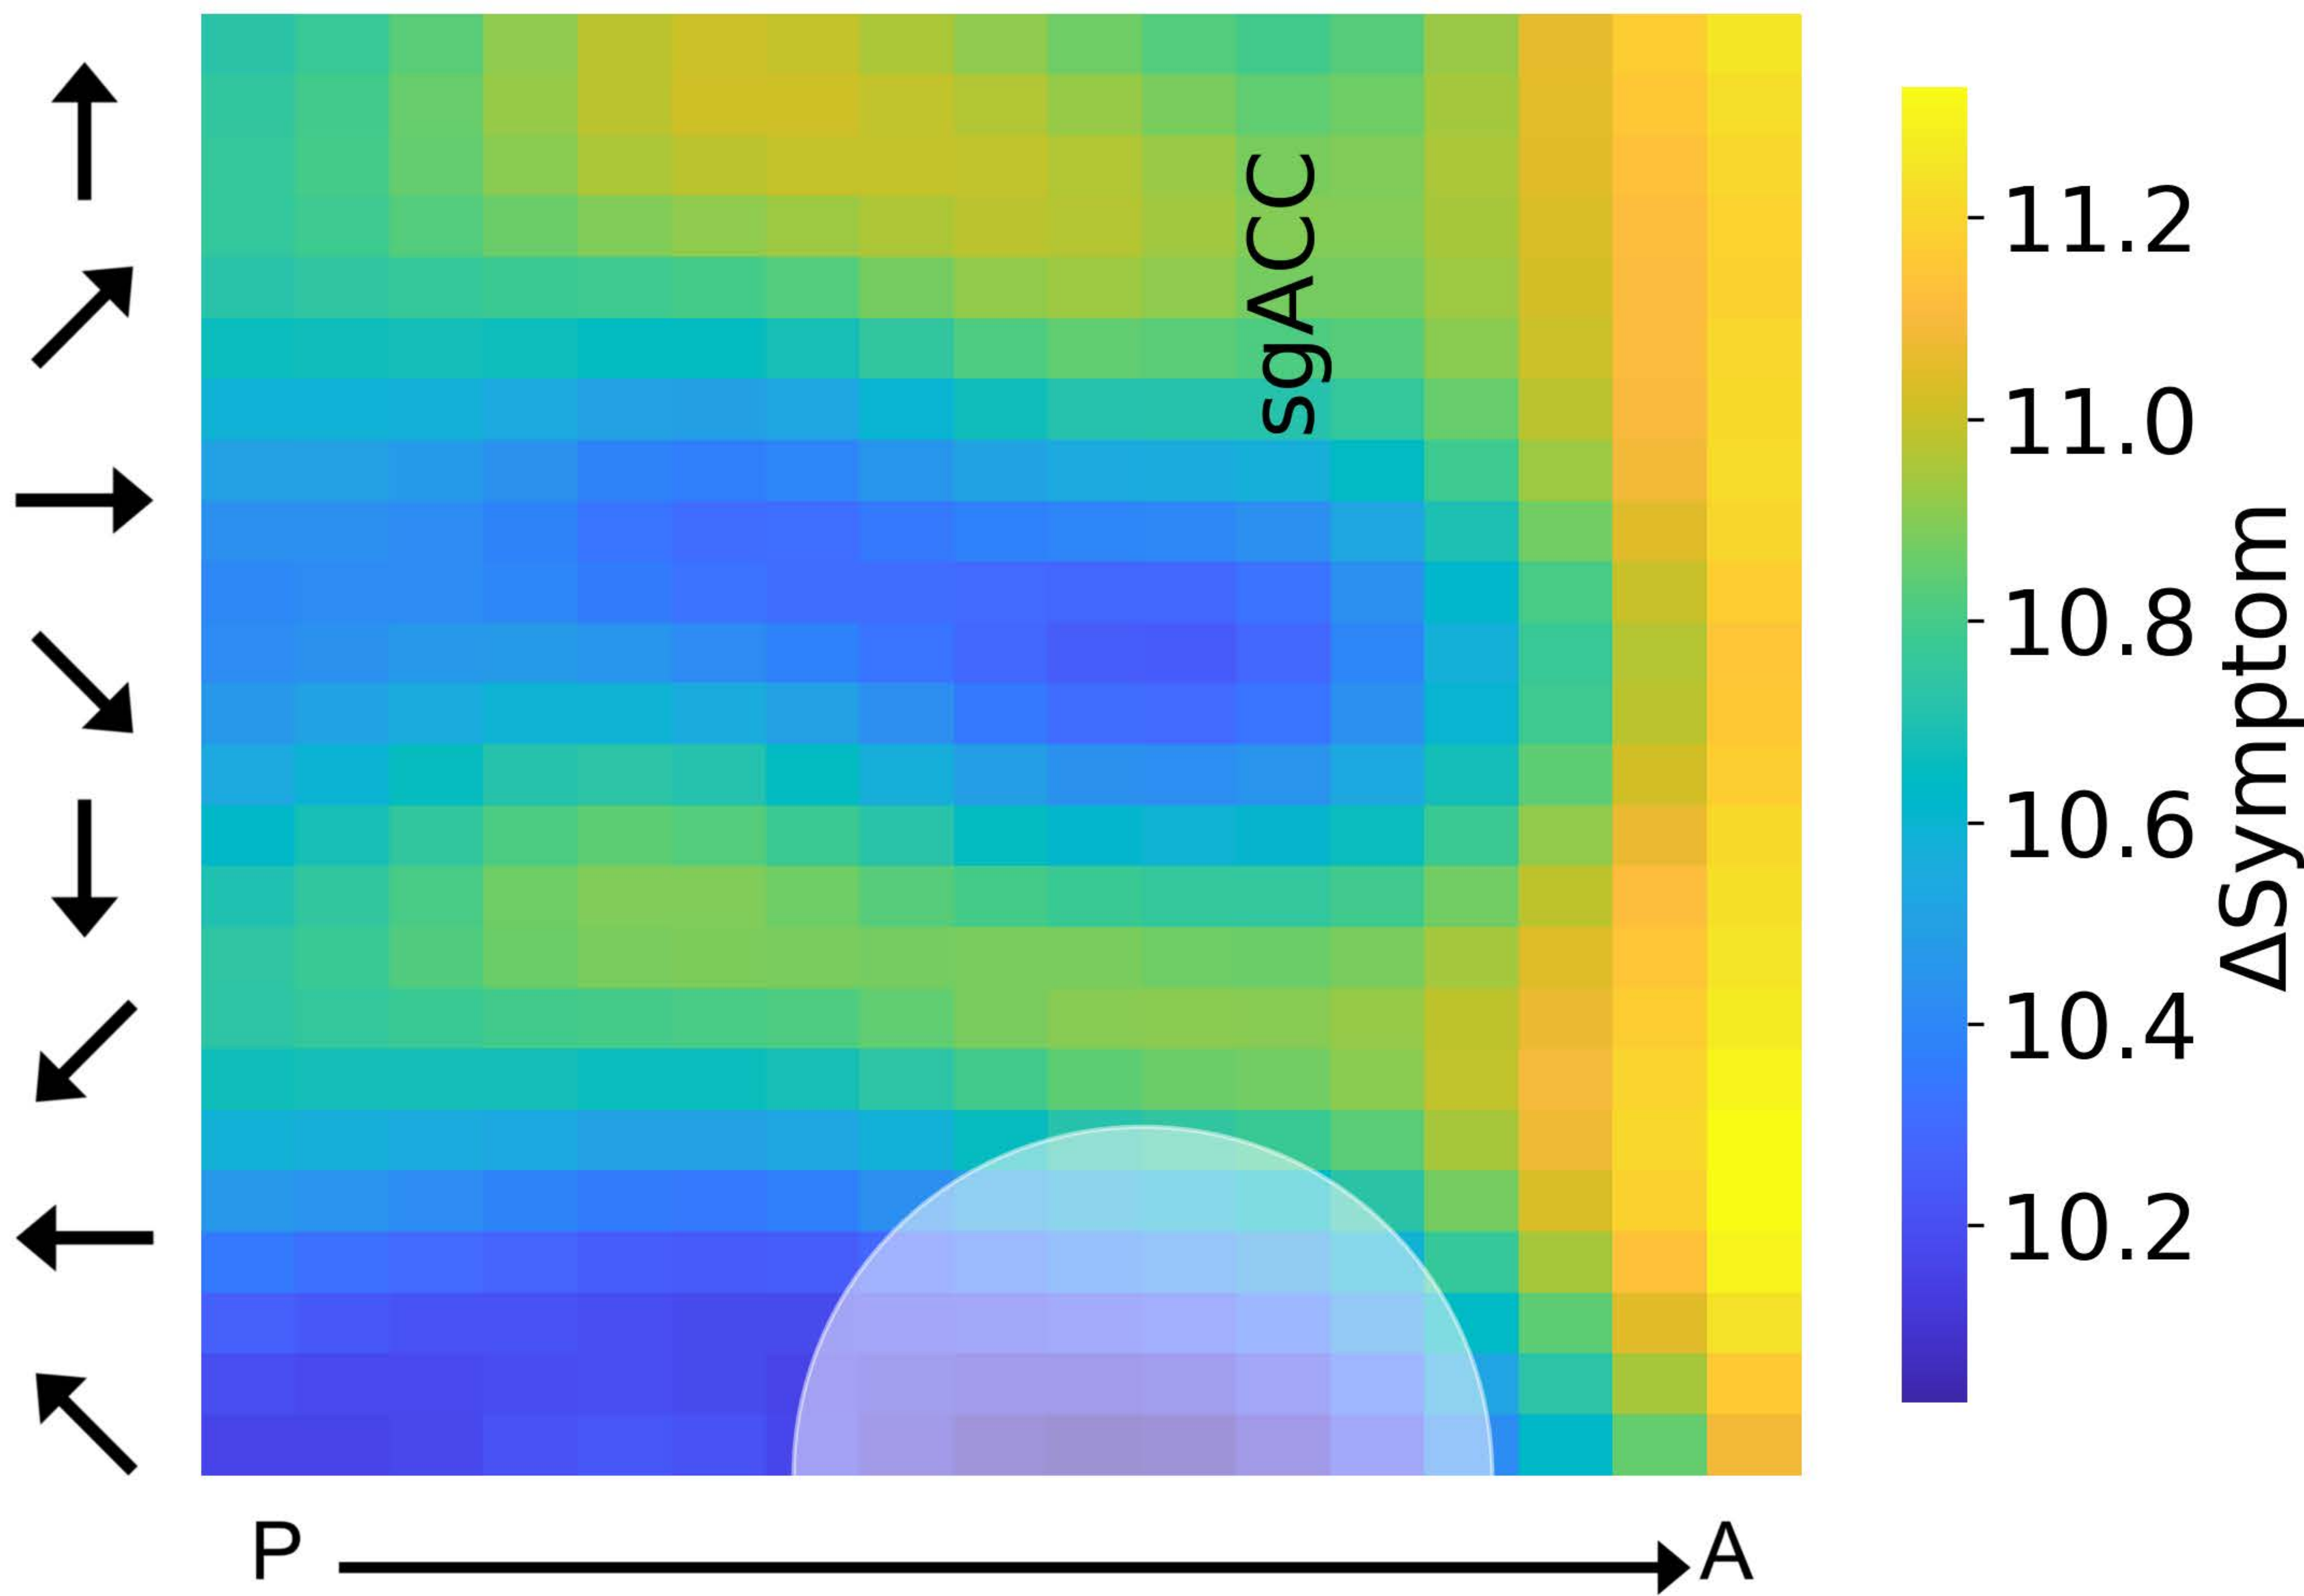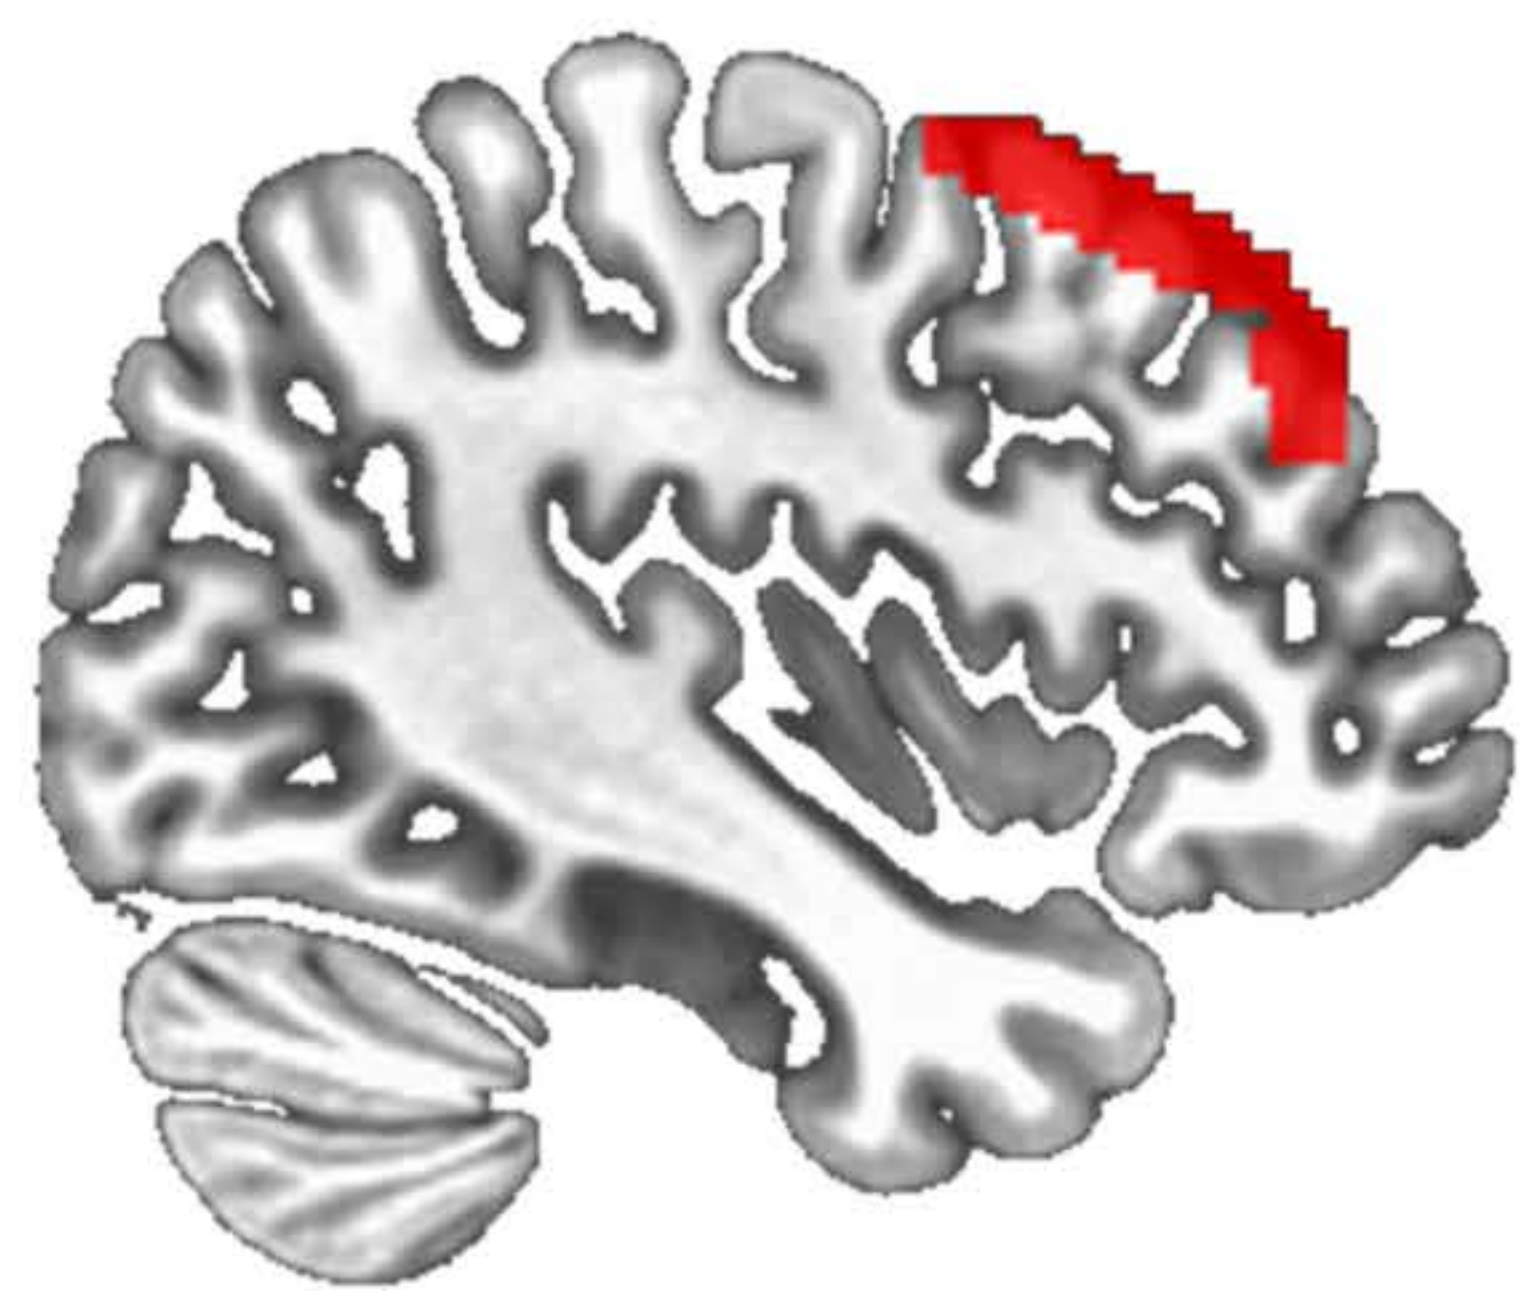



# INDARDL667VMW\_hamd\_right\_dlpfc

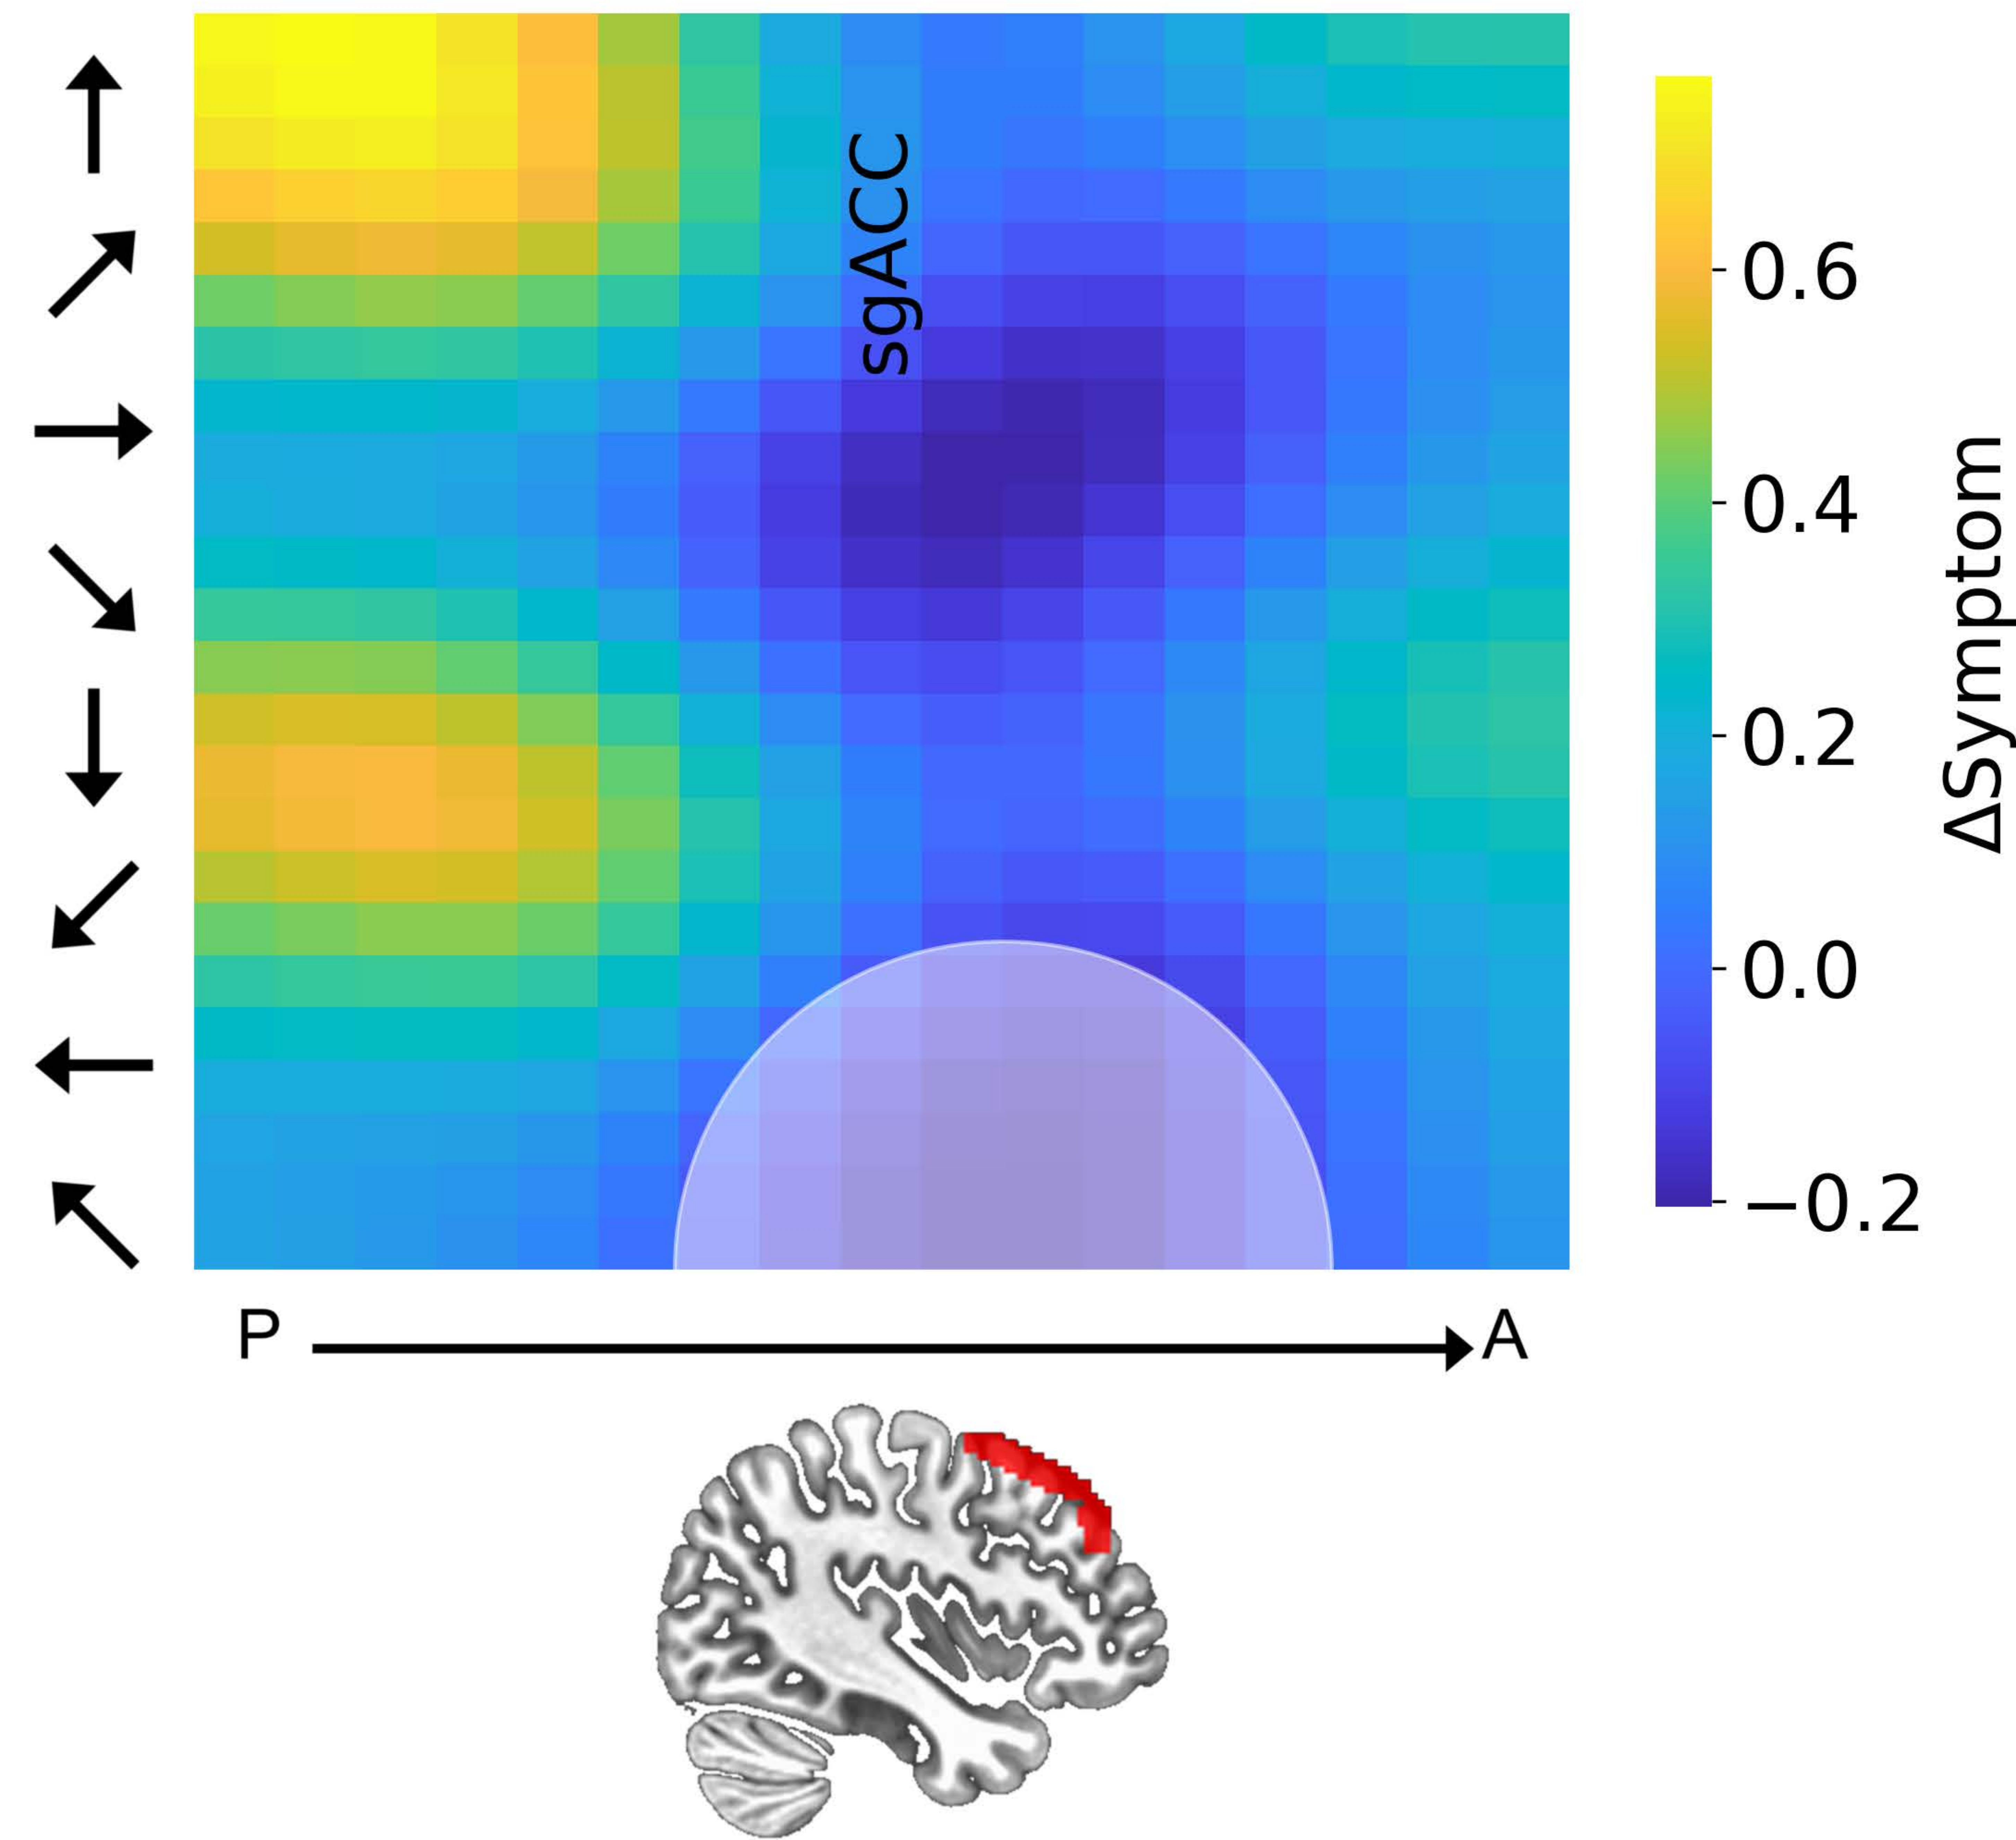



# INDARDR017YX2\_hamd\_right\_dlpfc

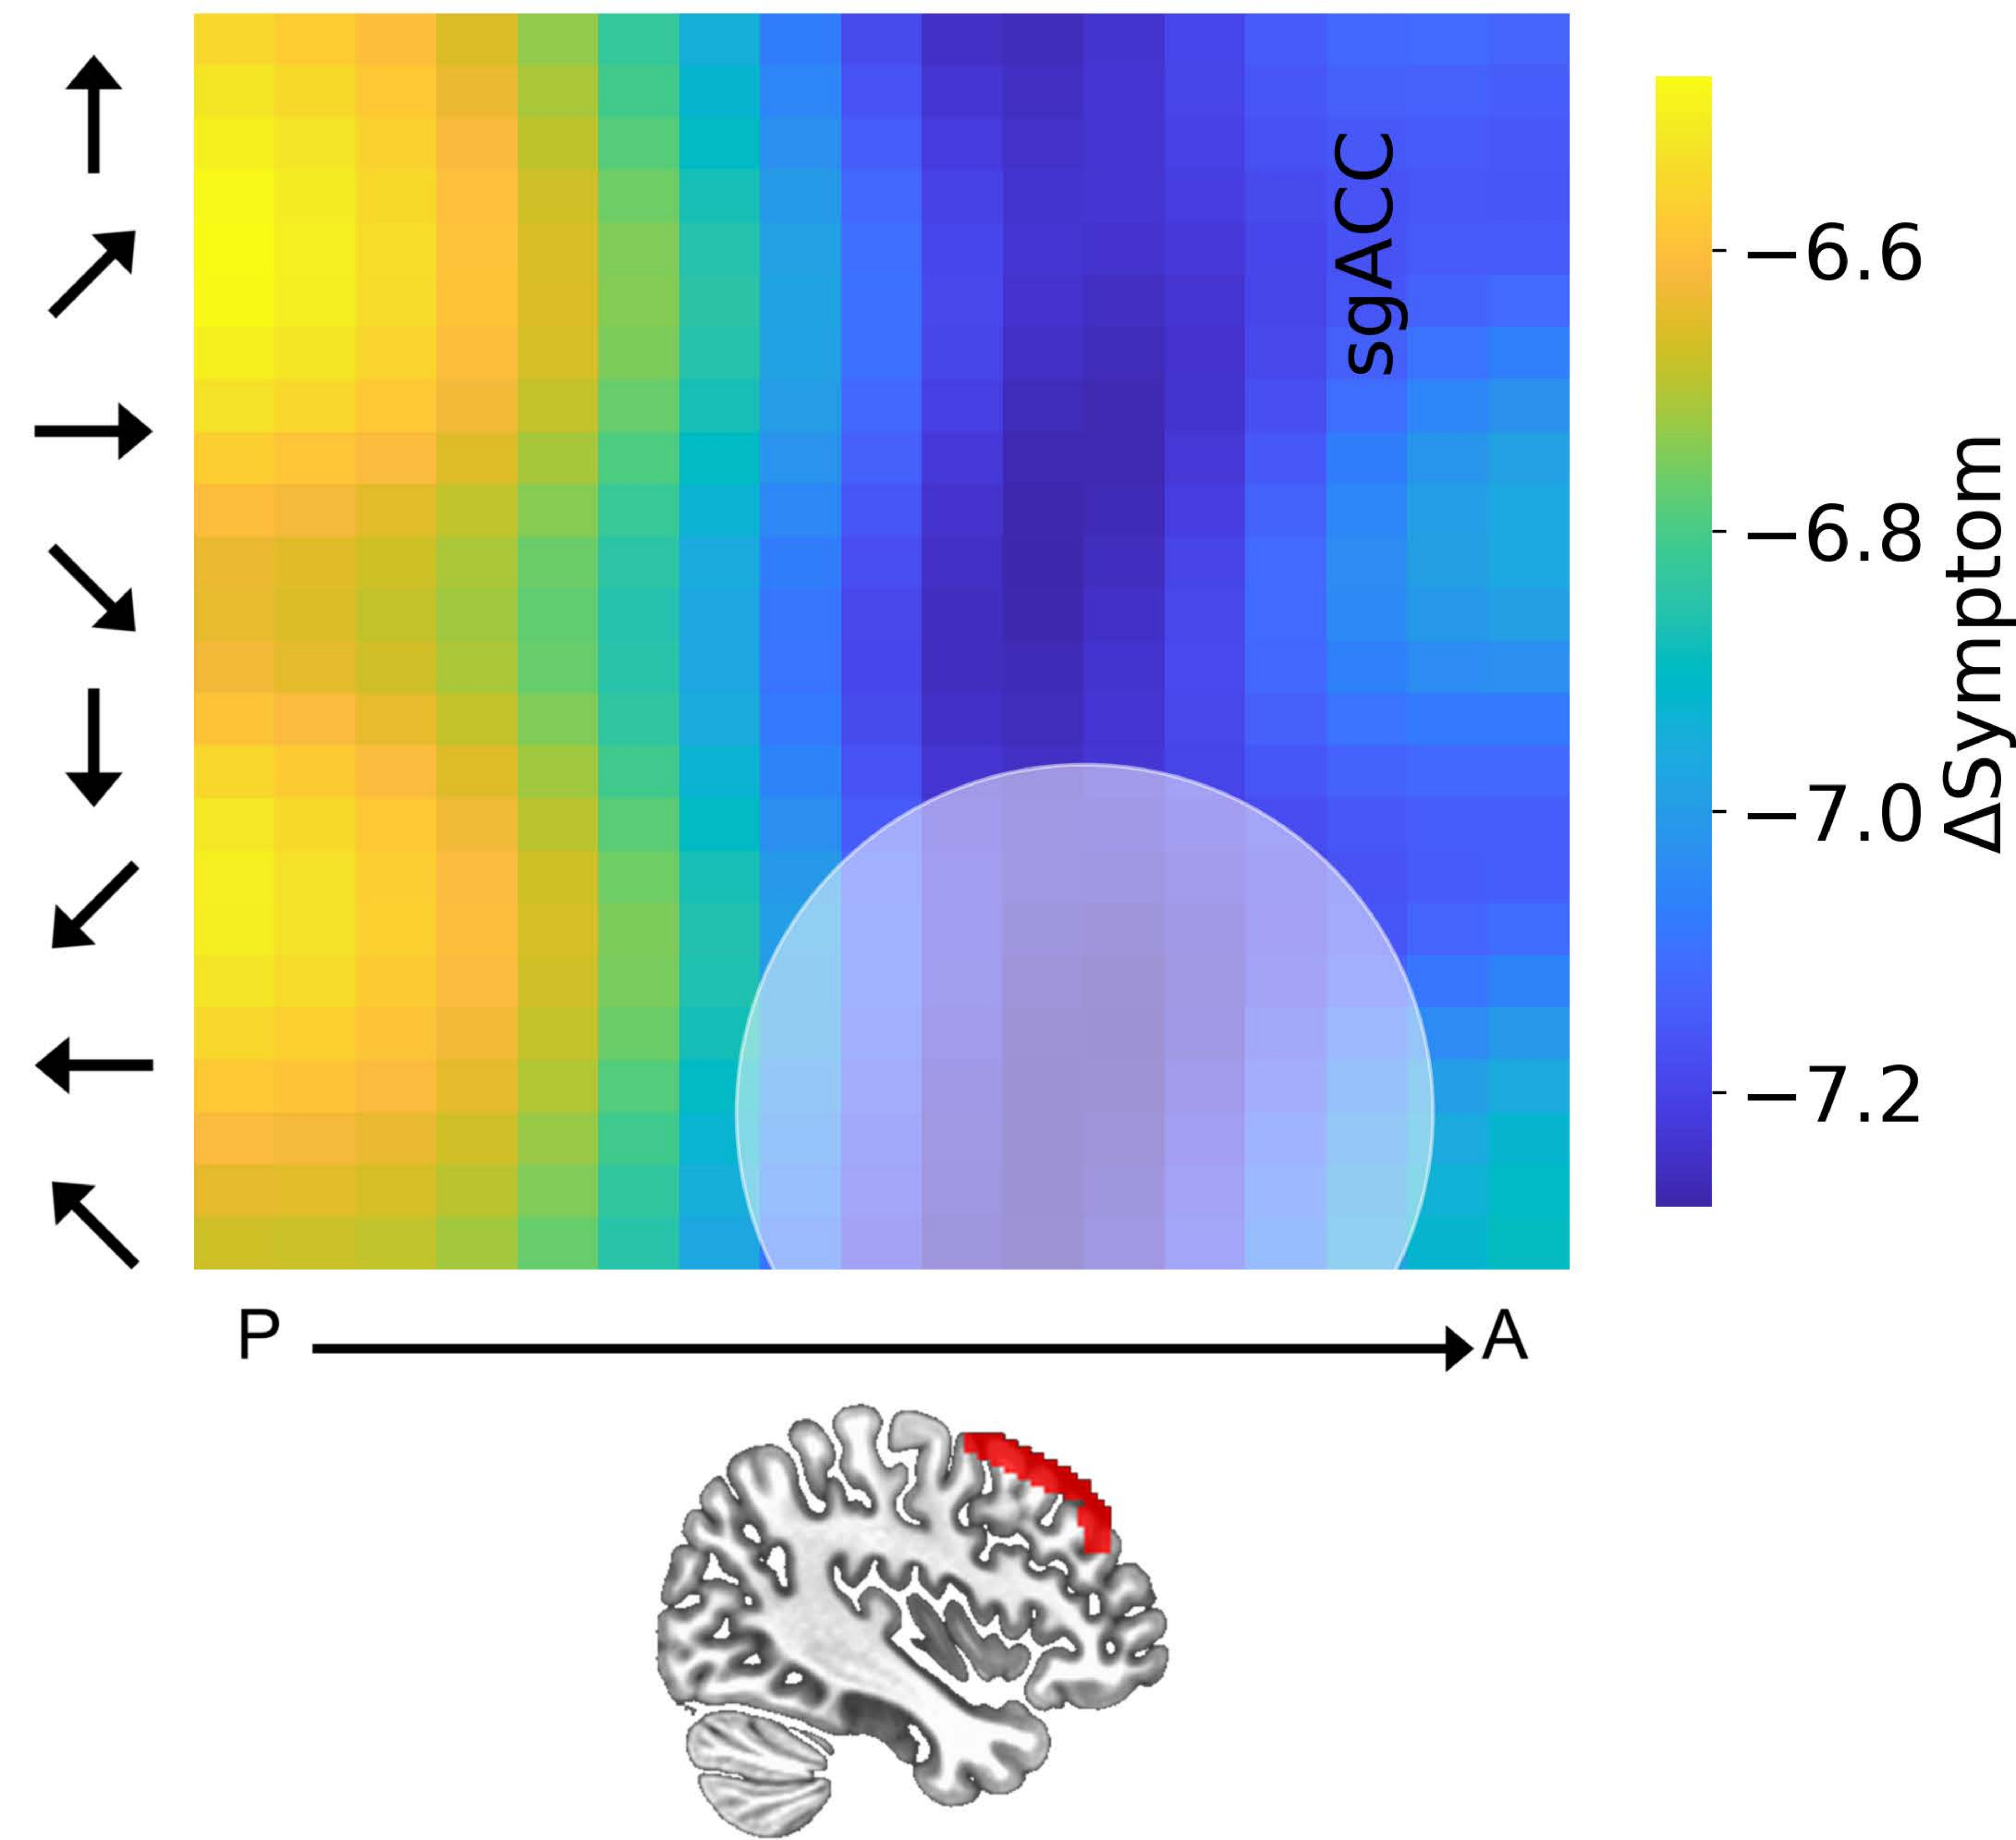



# INDARDU203PAW\_hamd\_right\_dlpfc

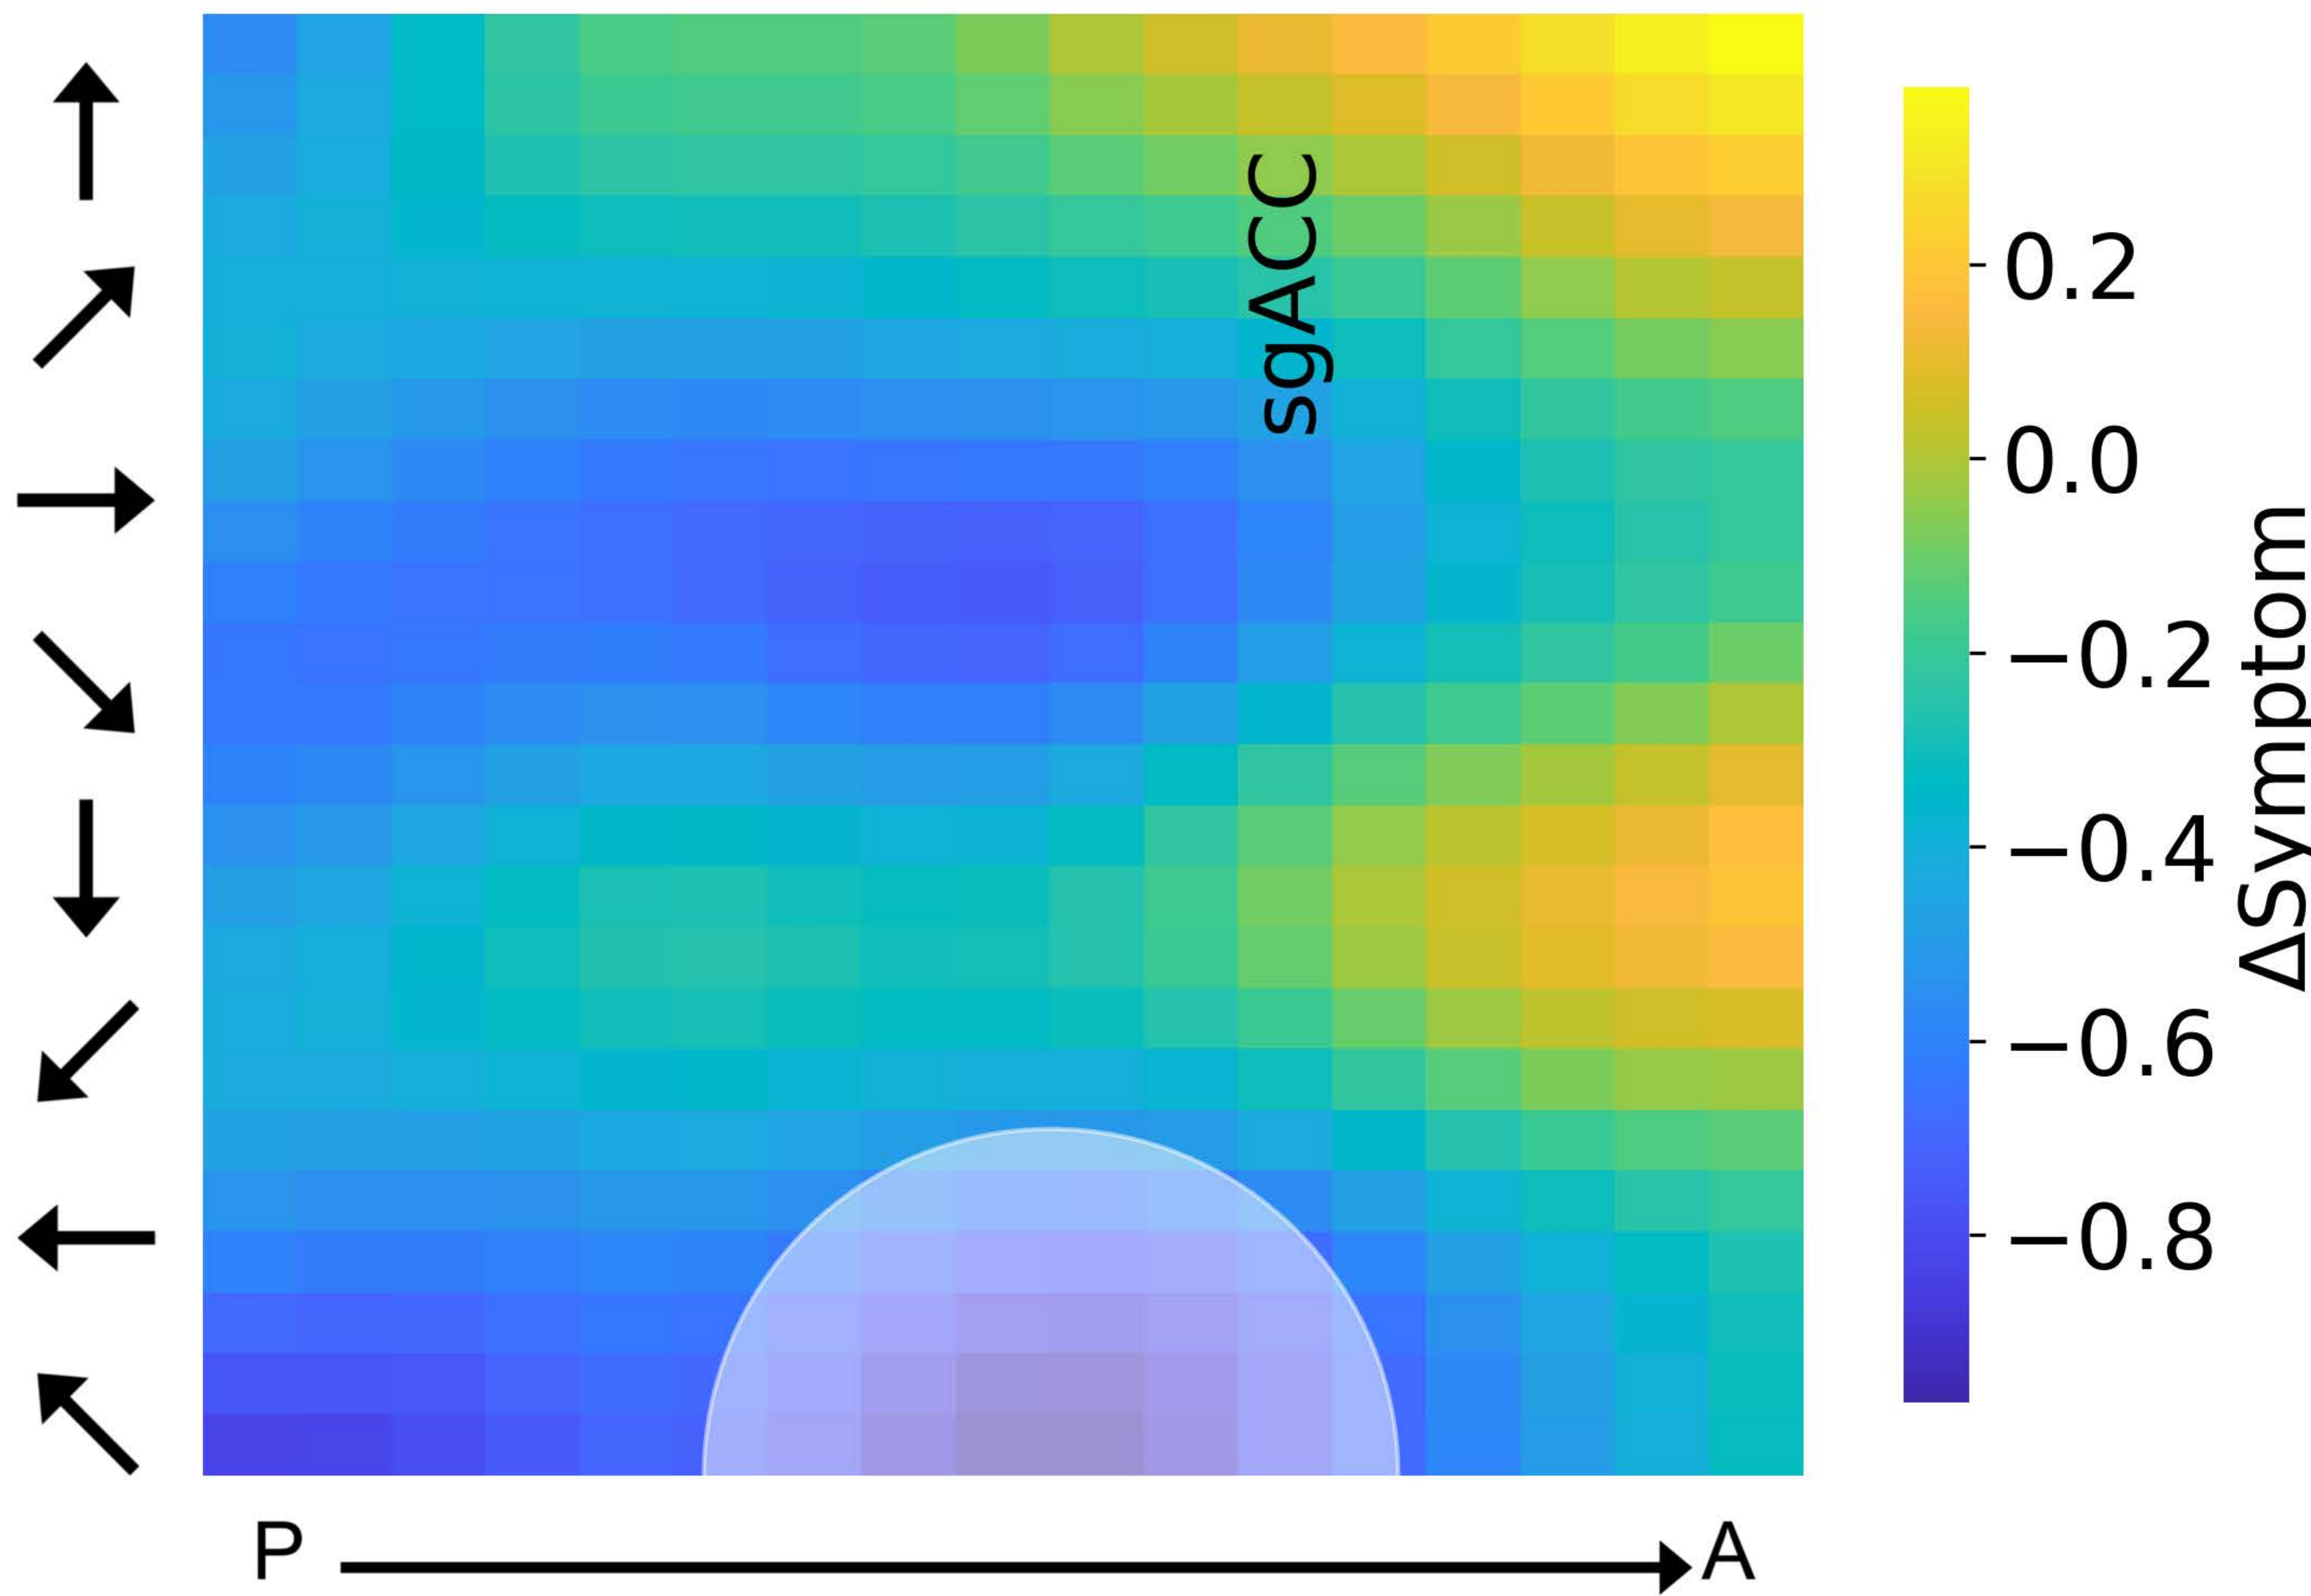



# INDARDU282NKX\_hamd\_right\_dlpfc

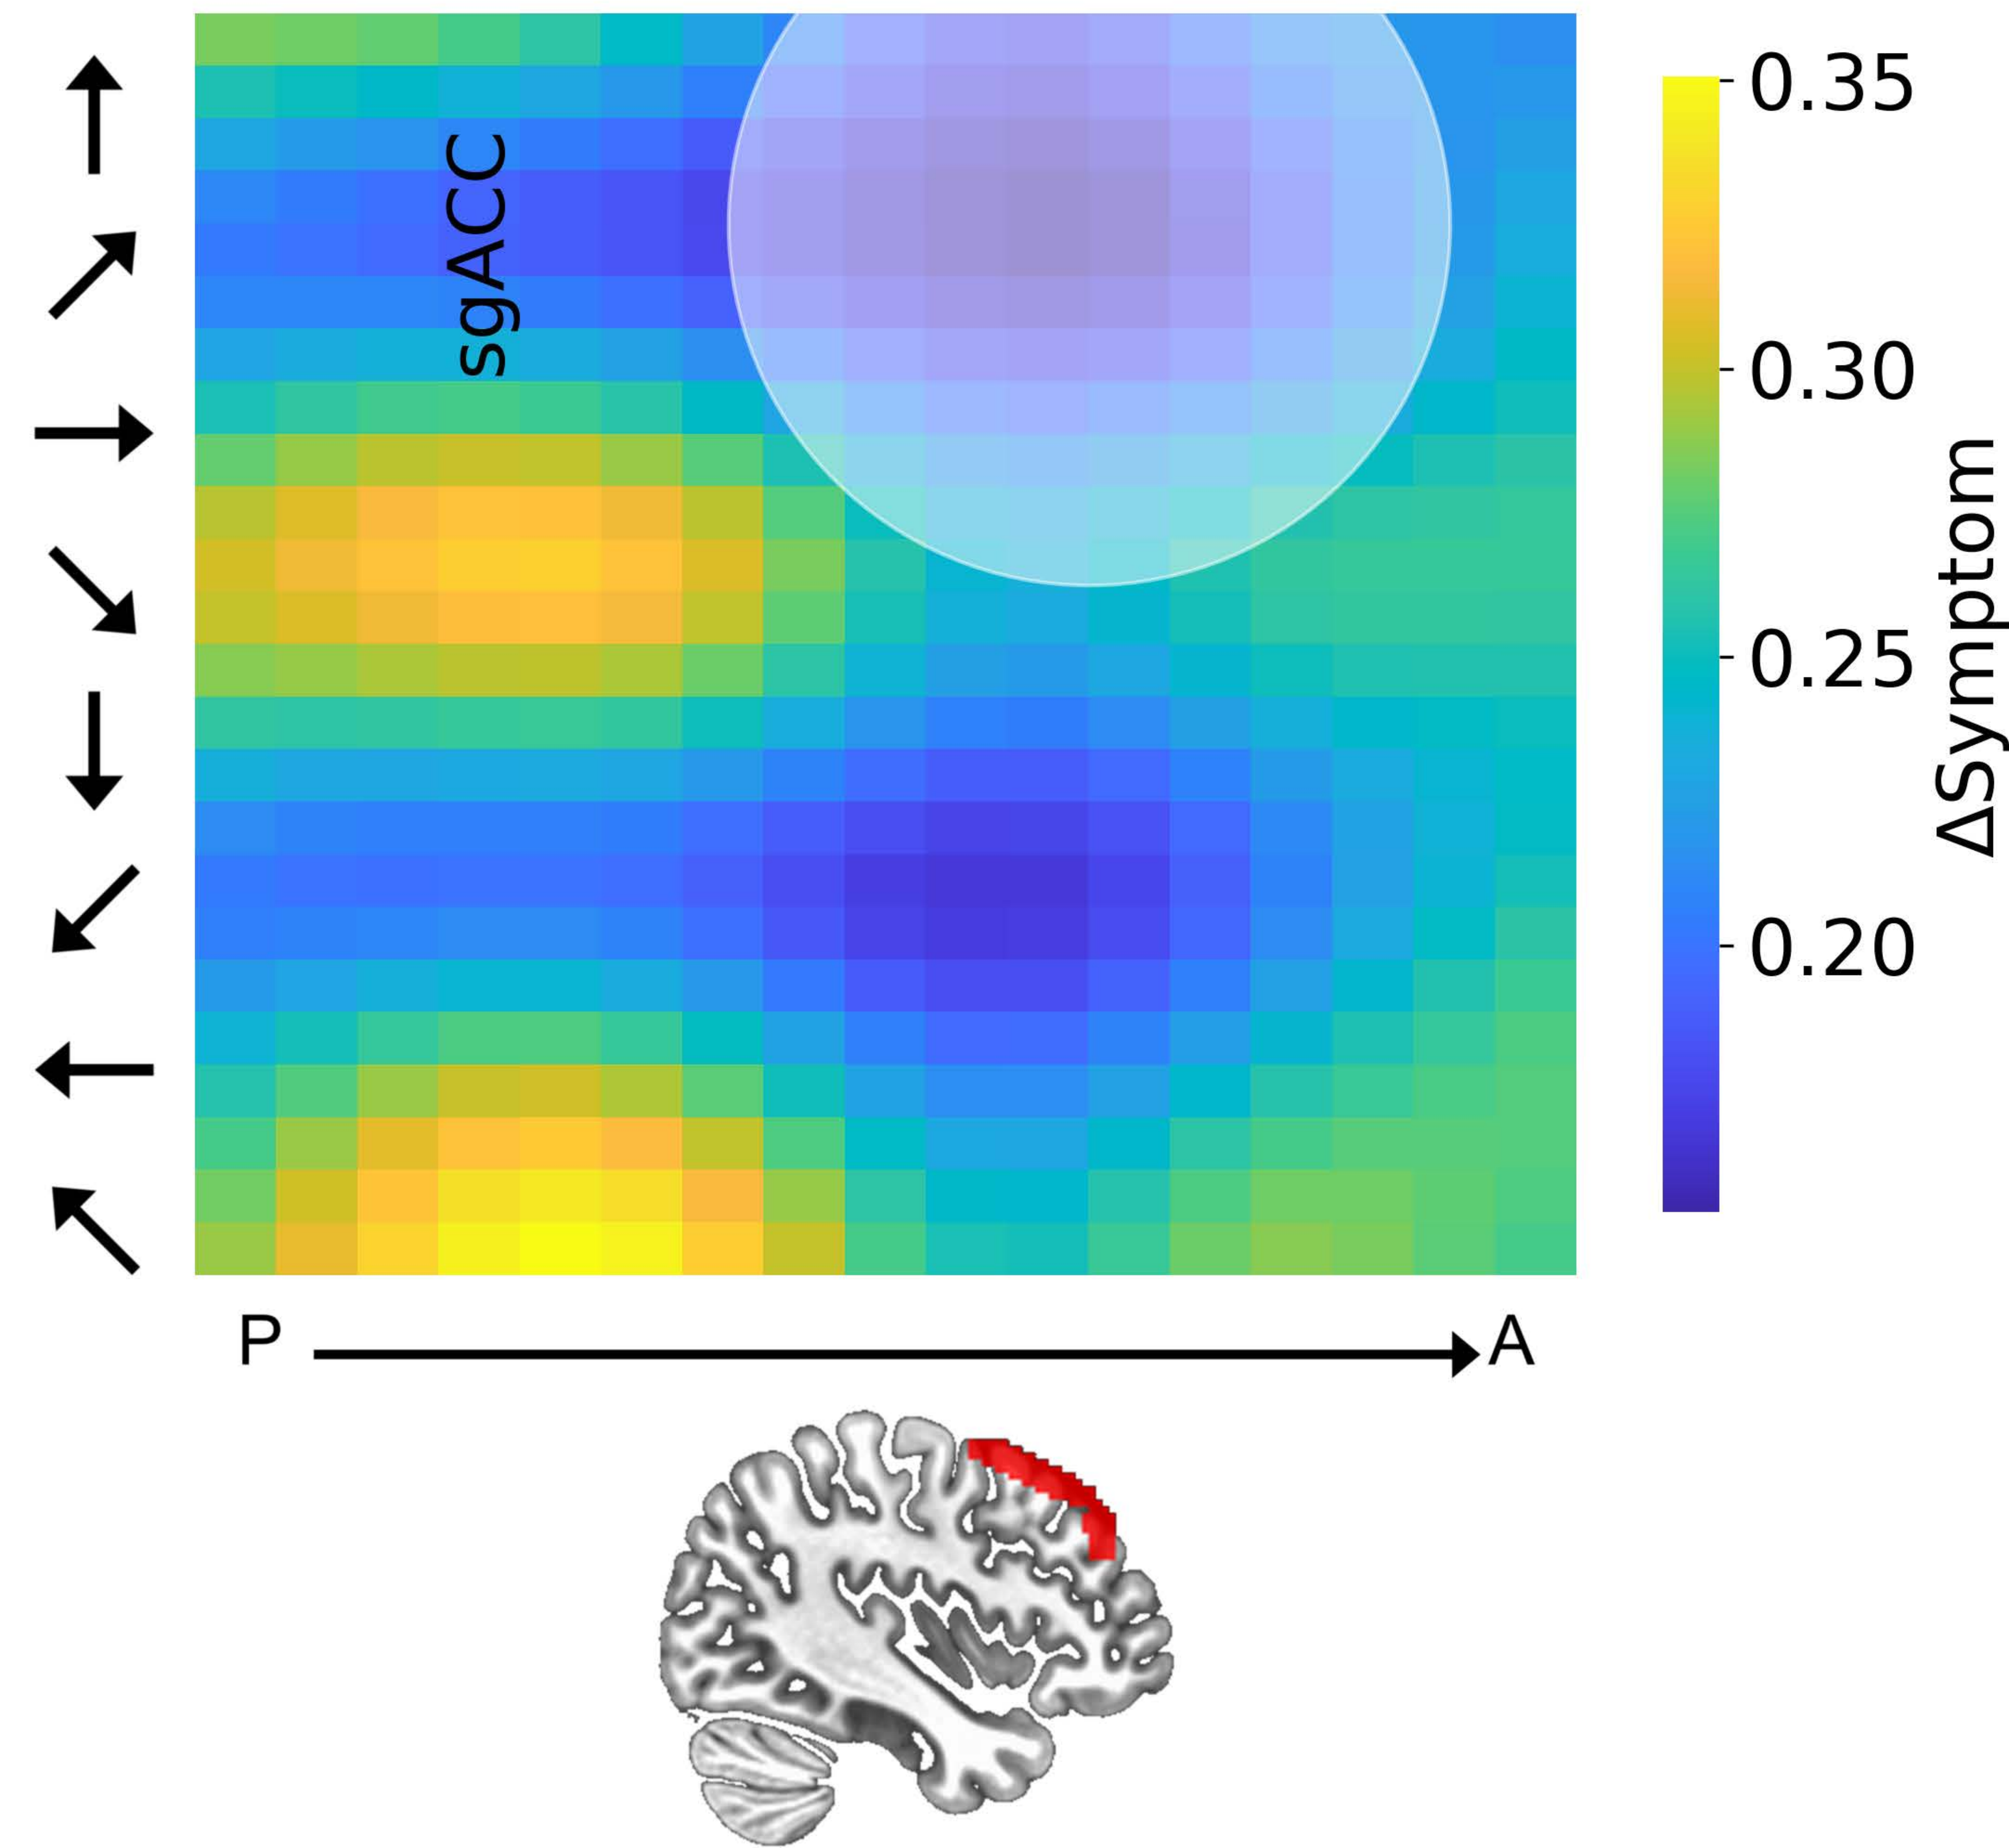



# INDARDV056JZW\_hamd\_right\_dlpfc

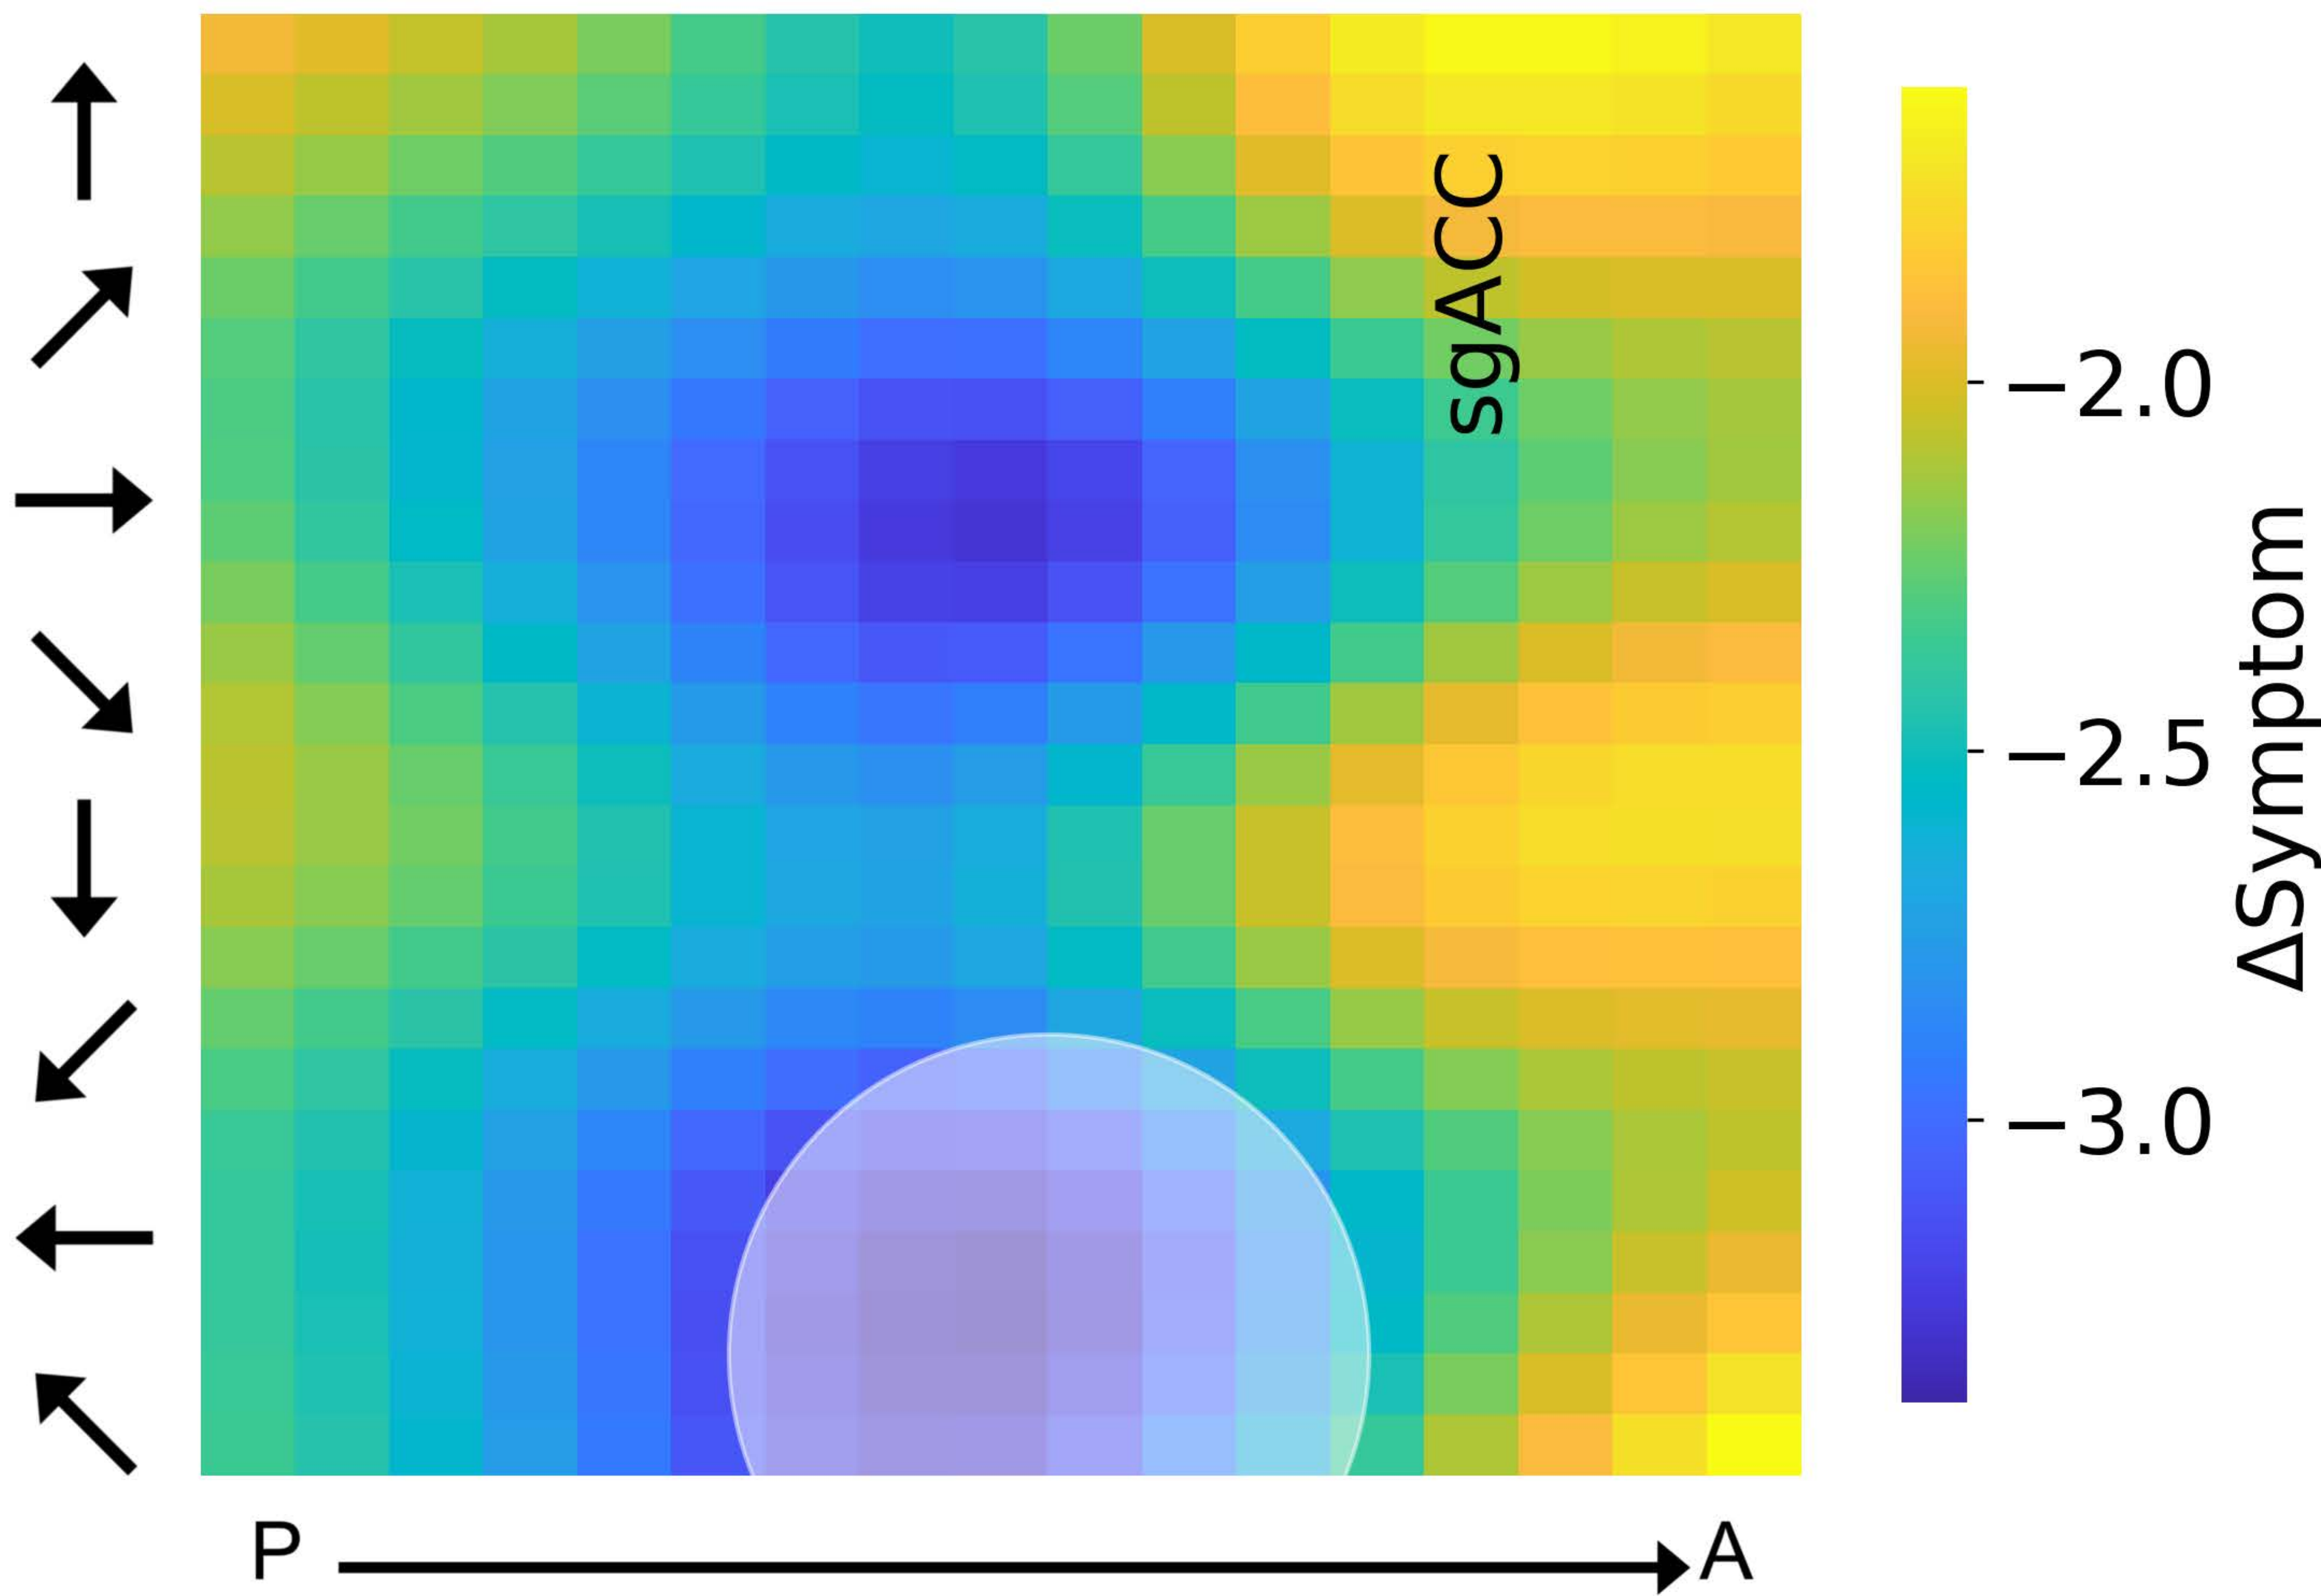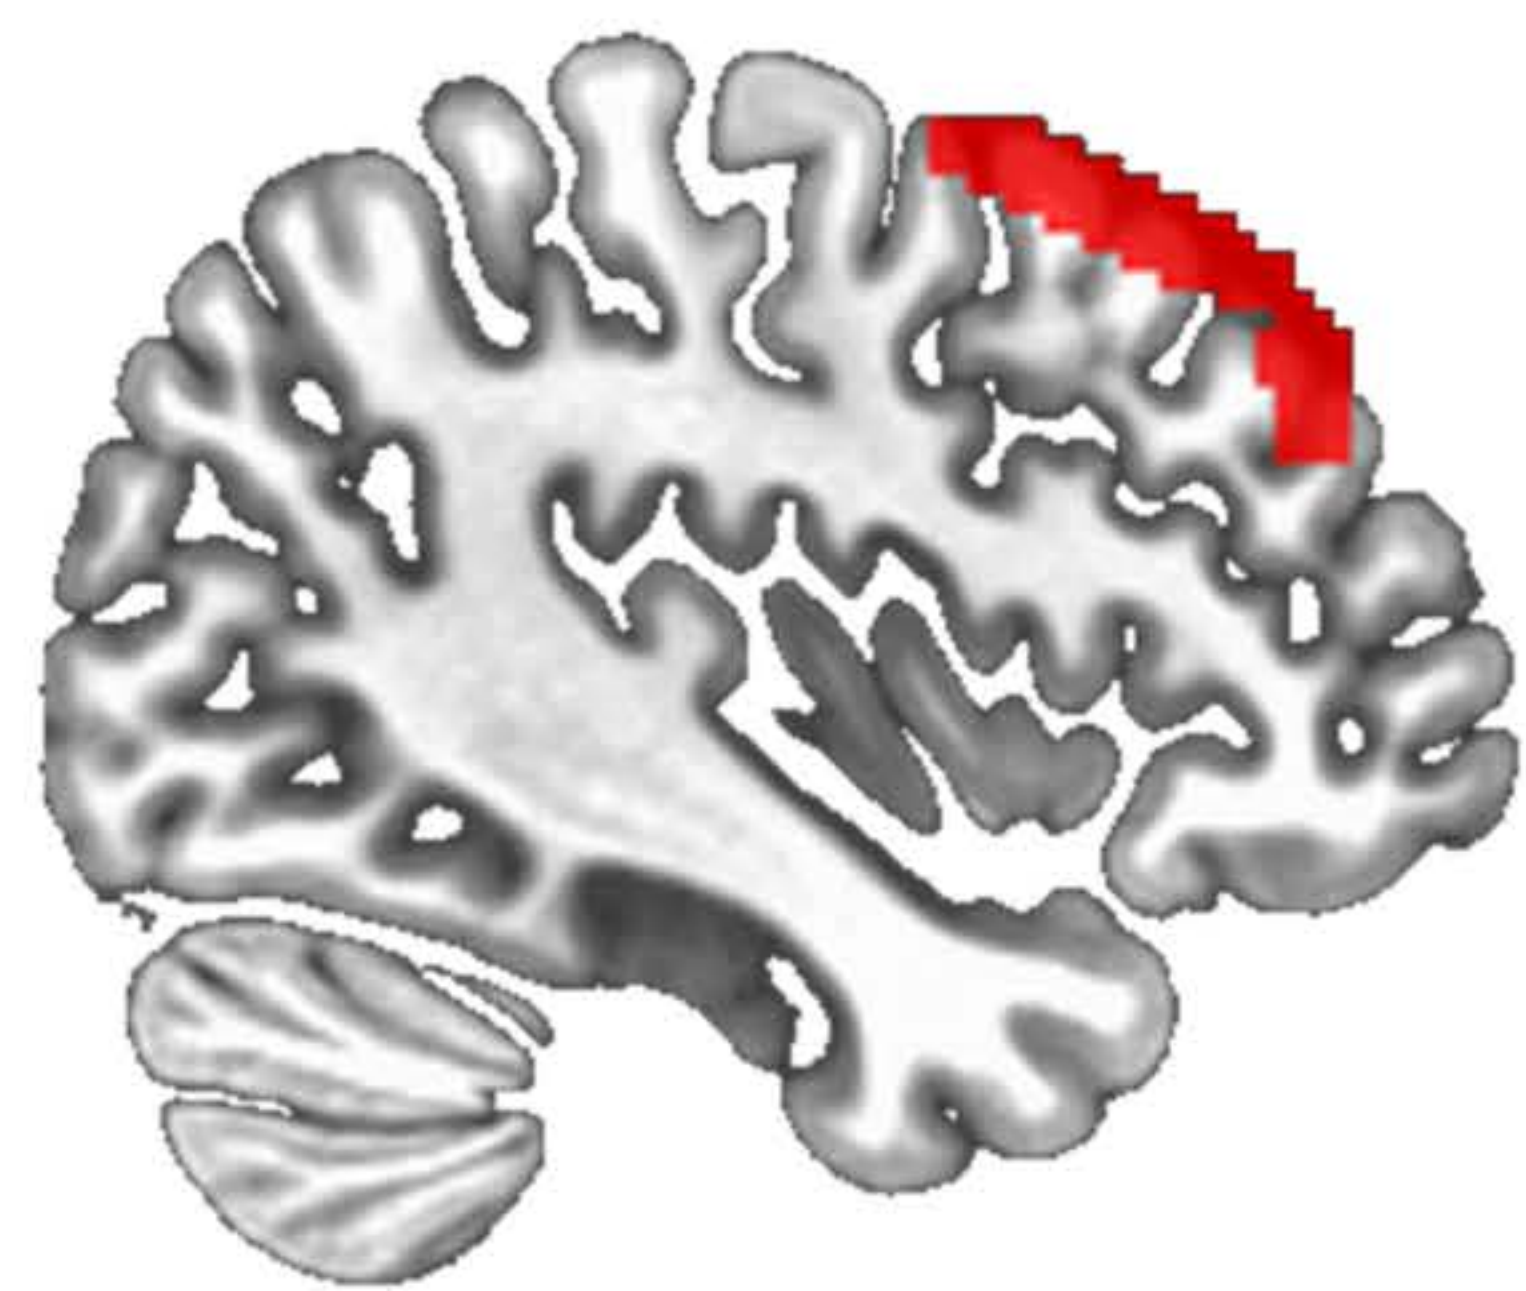



# NDAREB933ZEU\_hamd\_right\_dlpfc

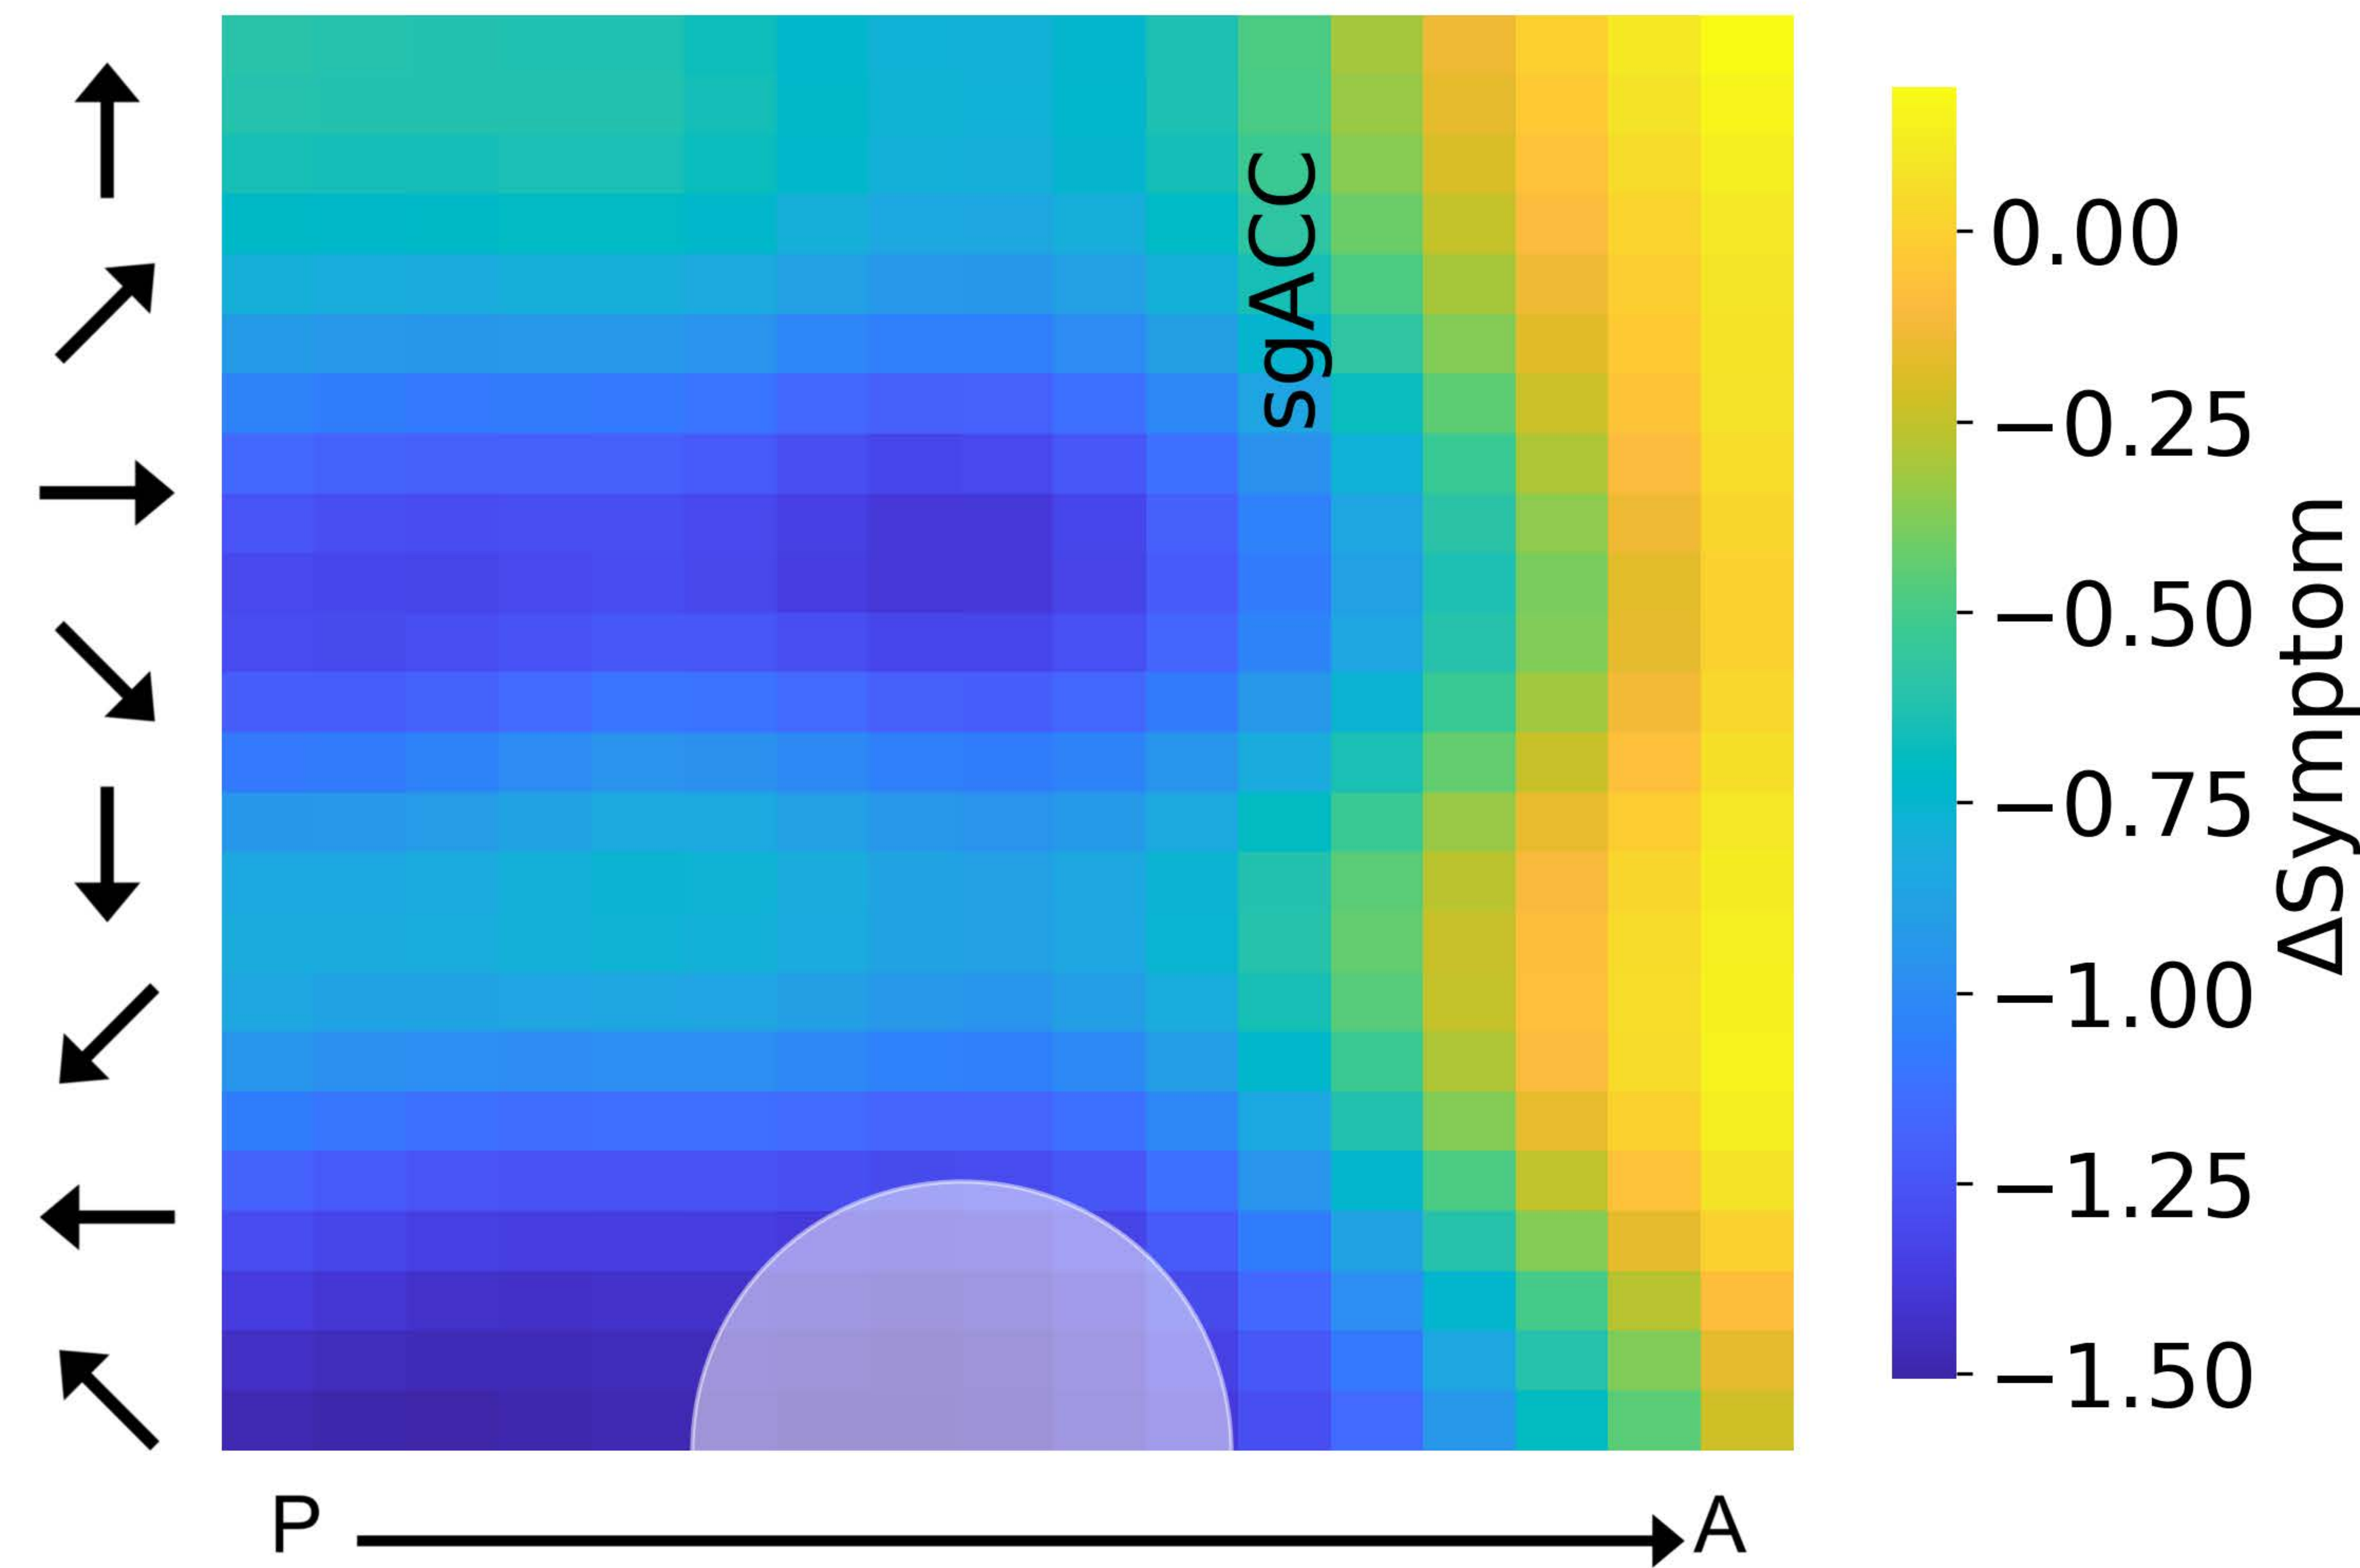



# INDAREU727GCY\_hamd\_right\_dlpfc

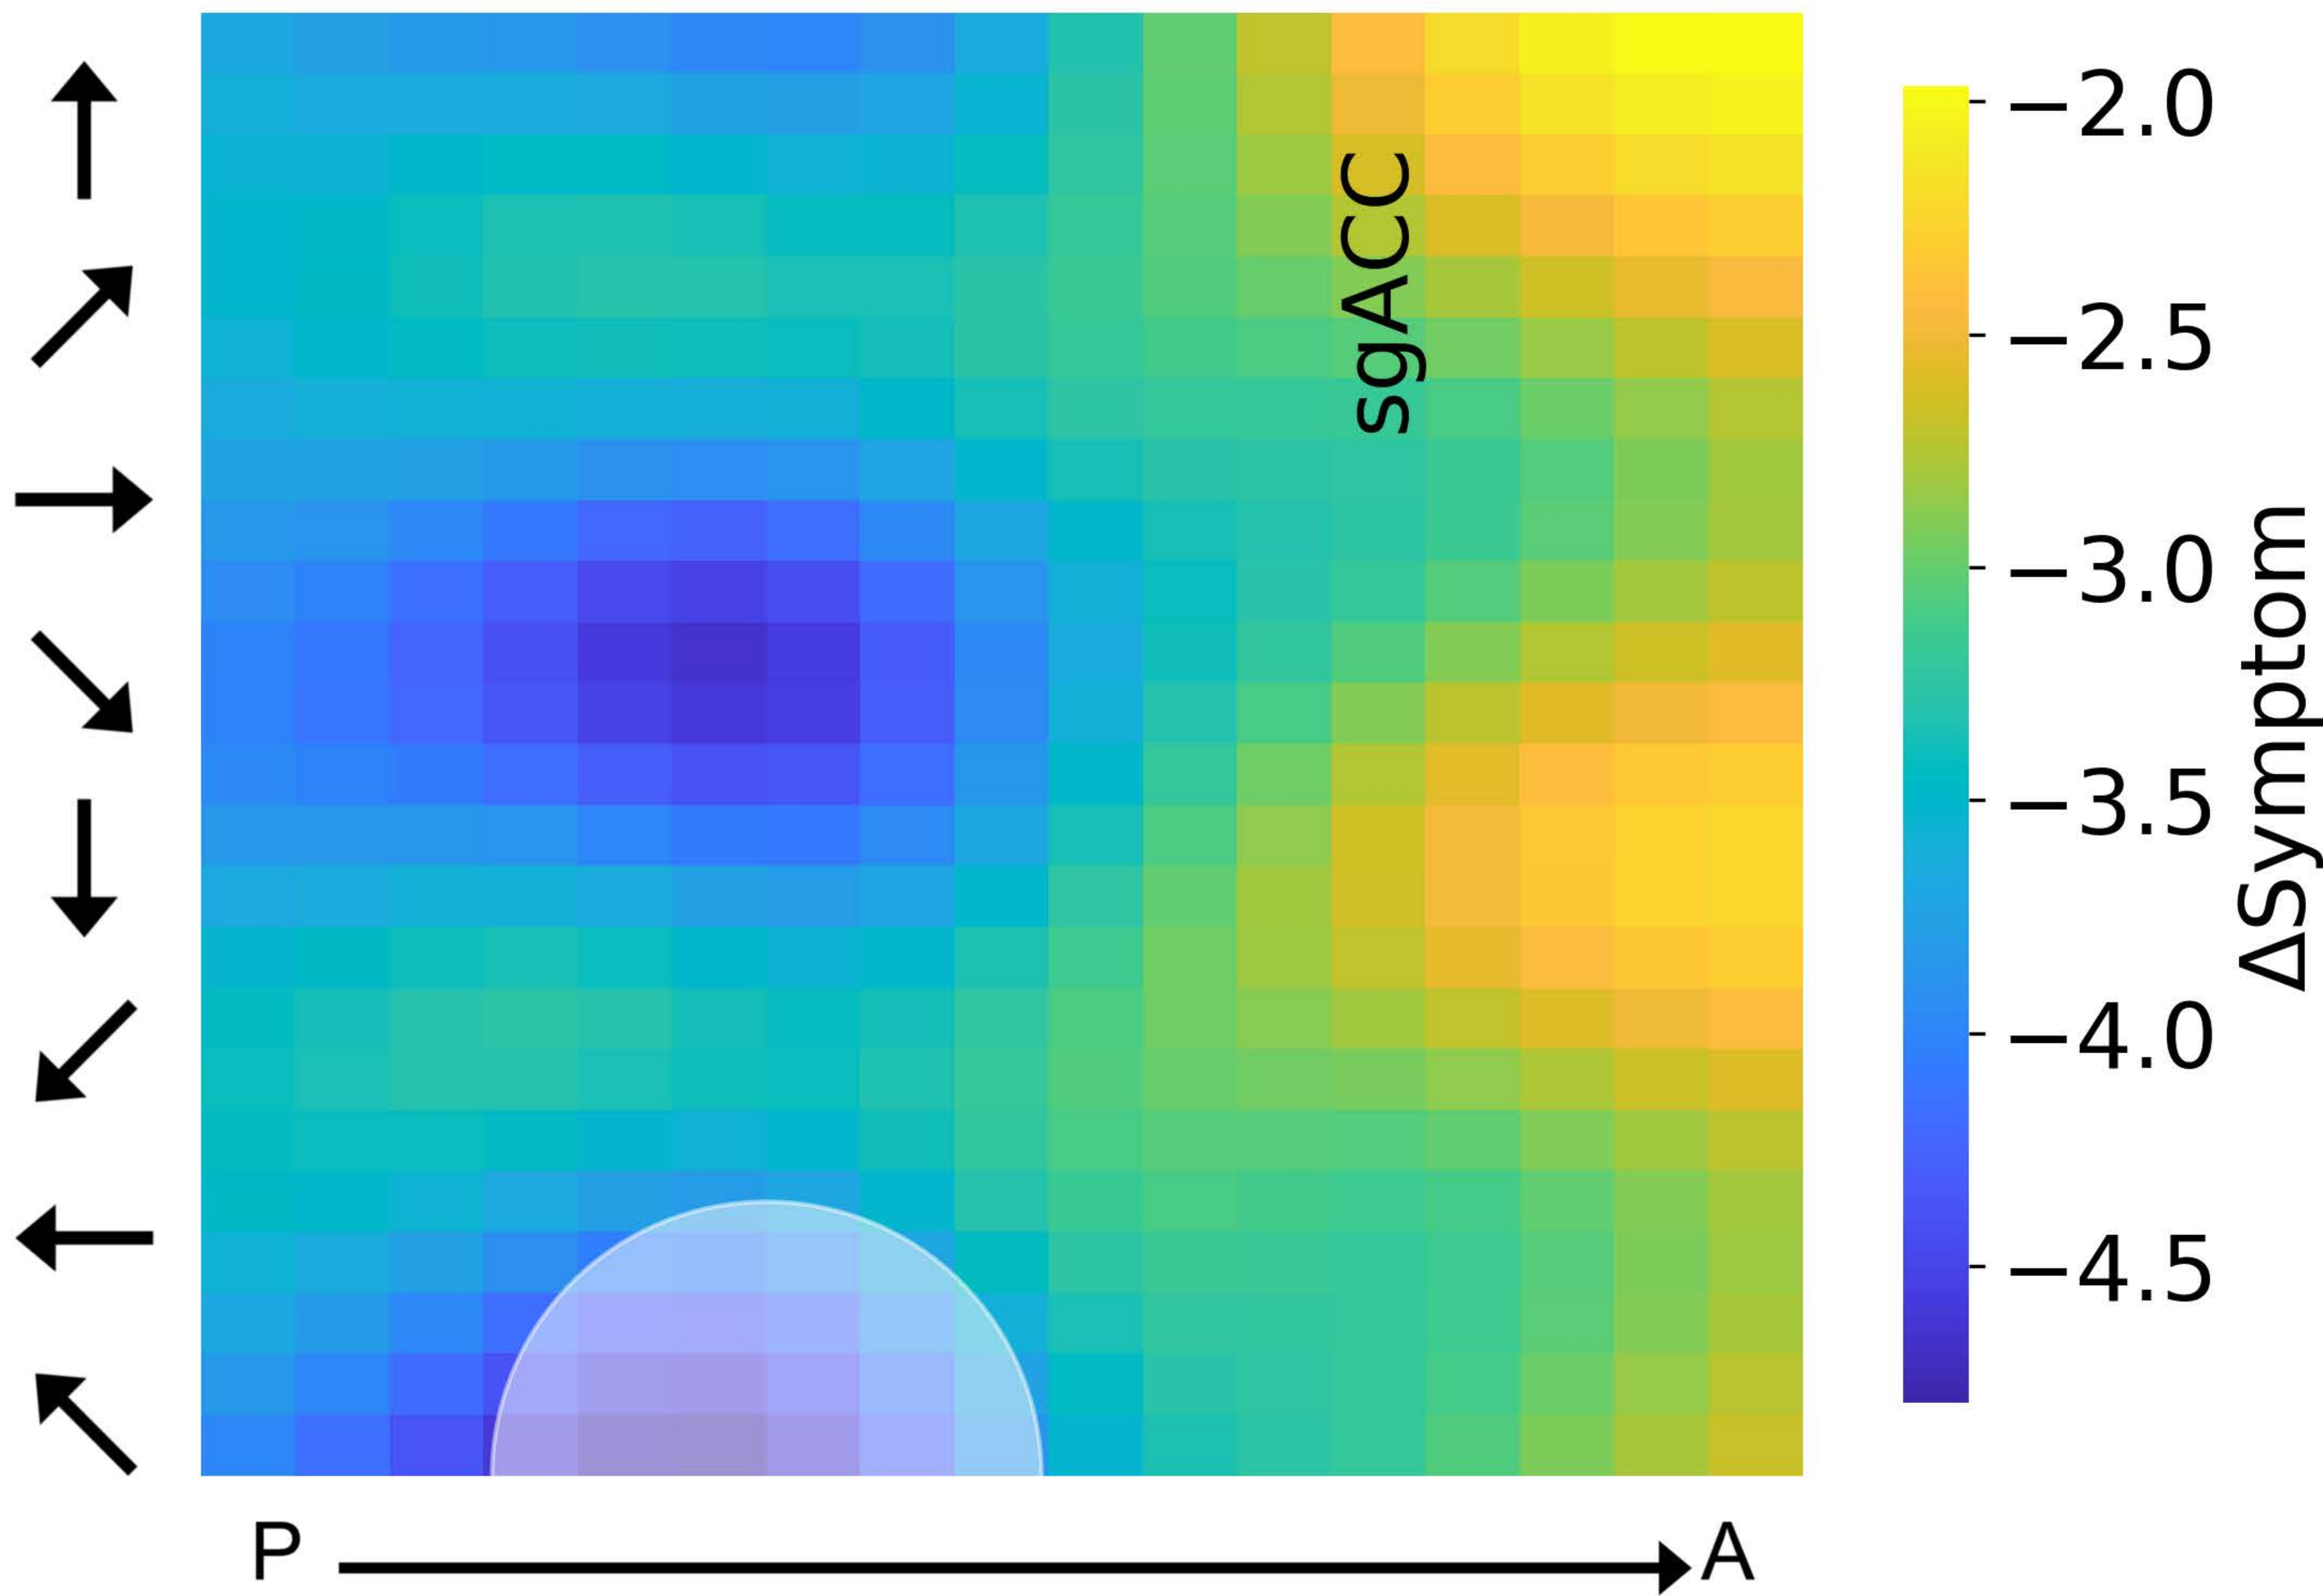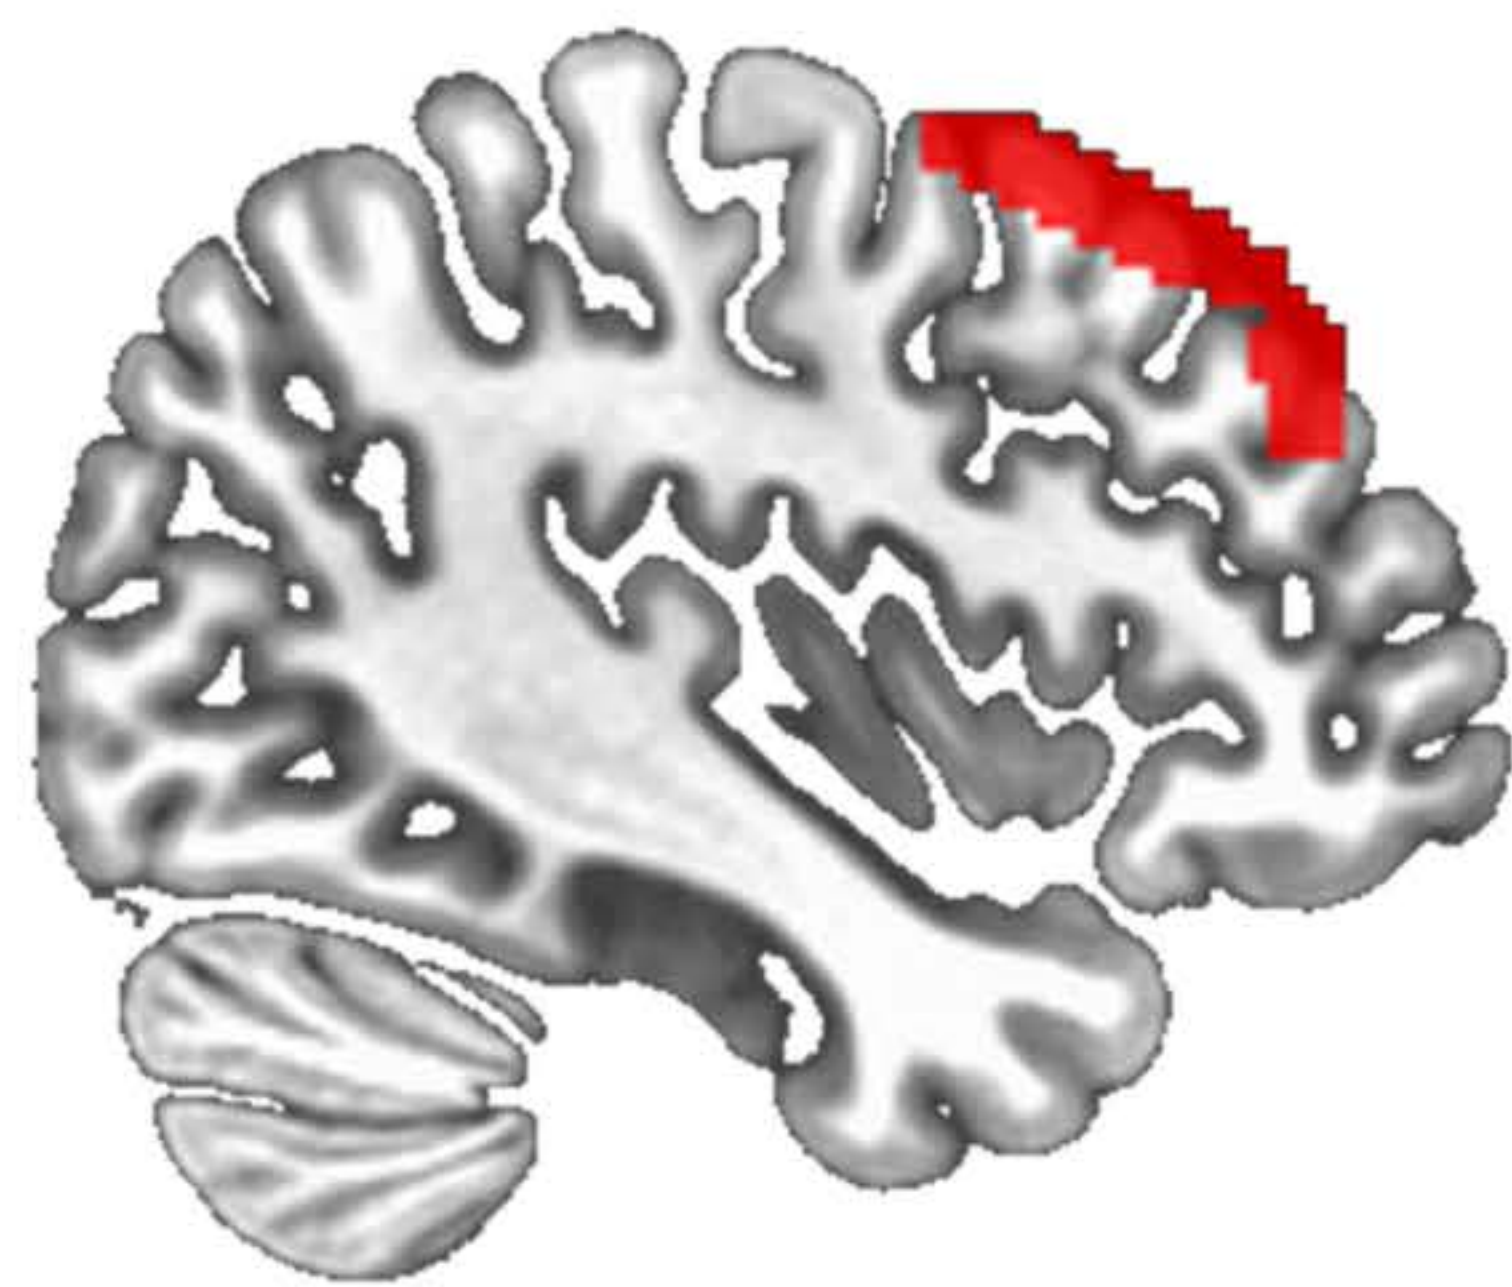



# INDAREW484UCJ\_hamd\_right\_dlpfc

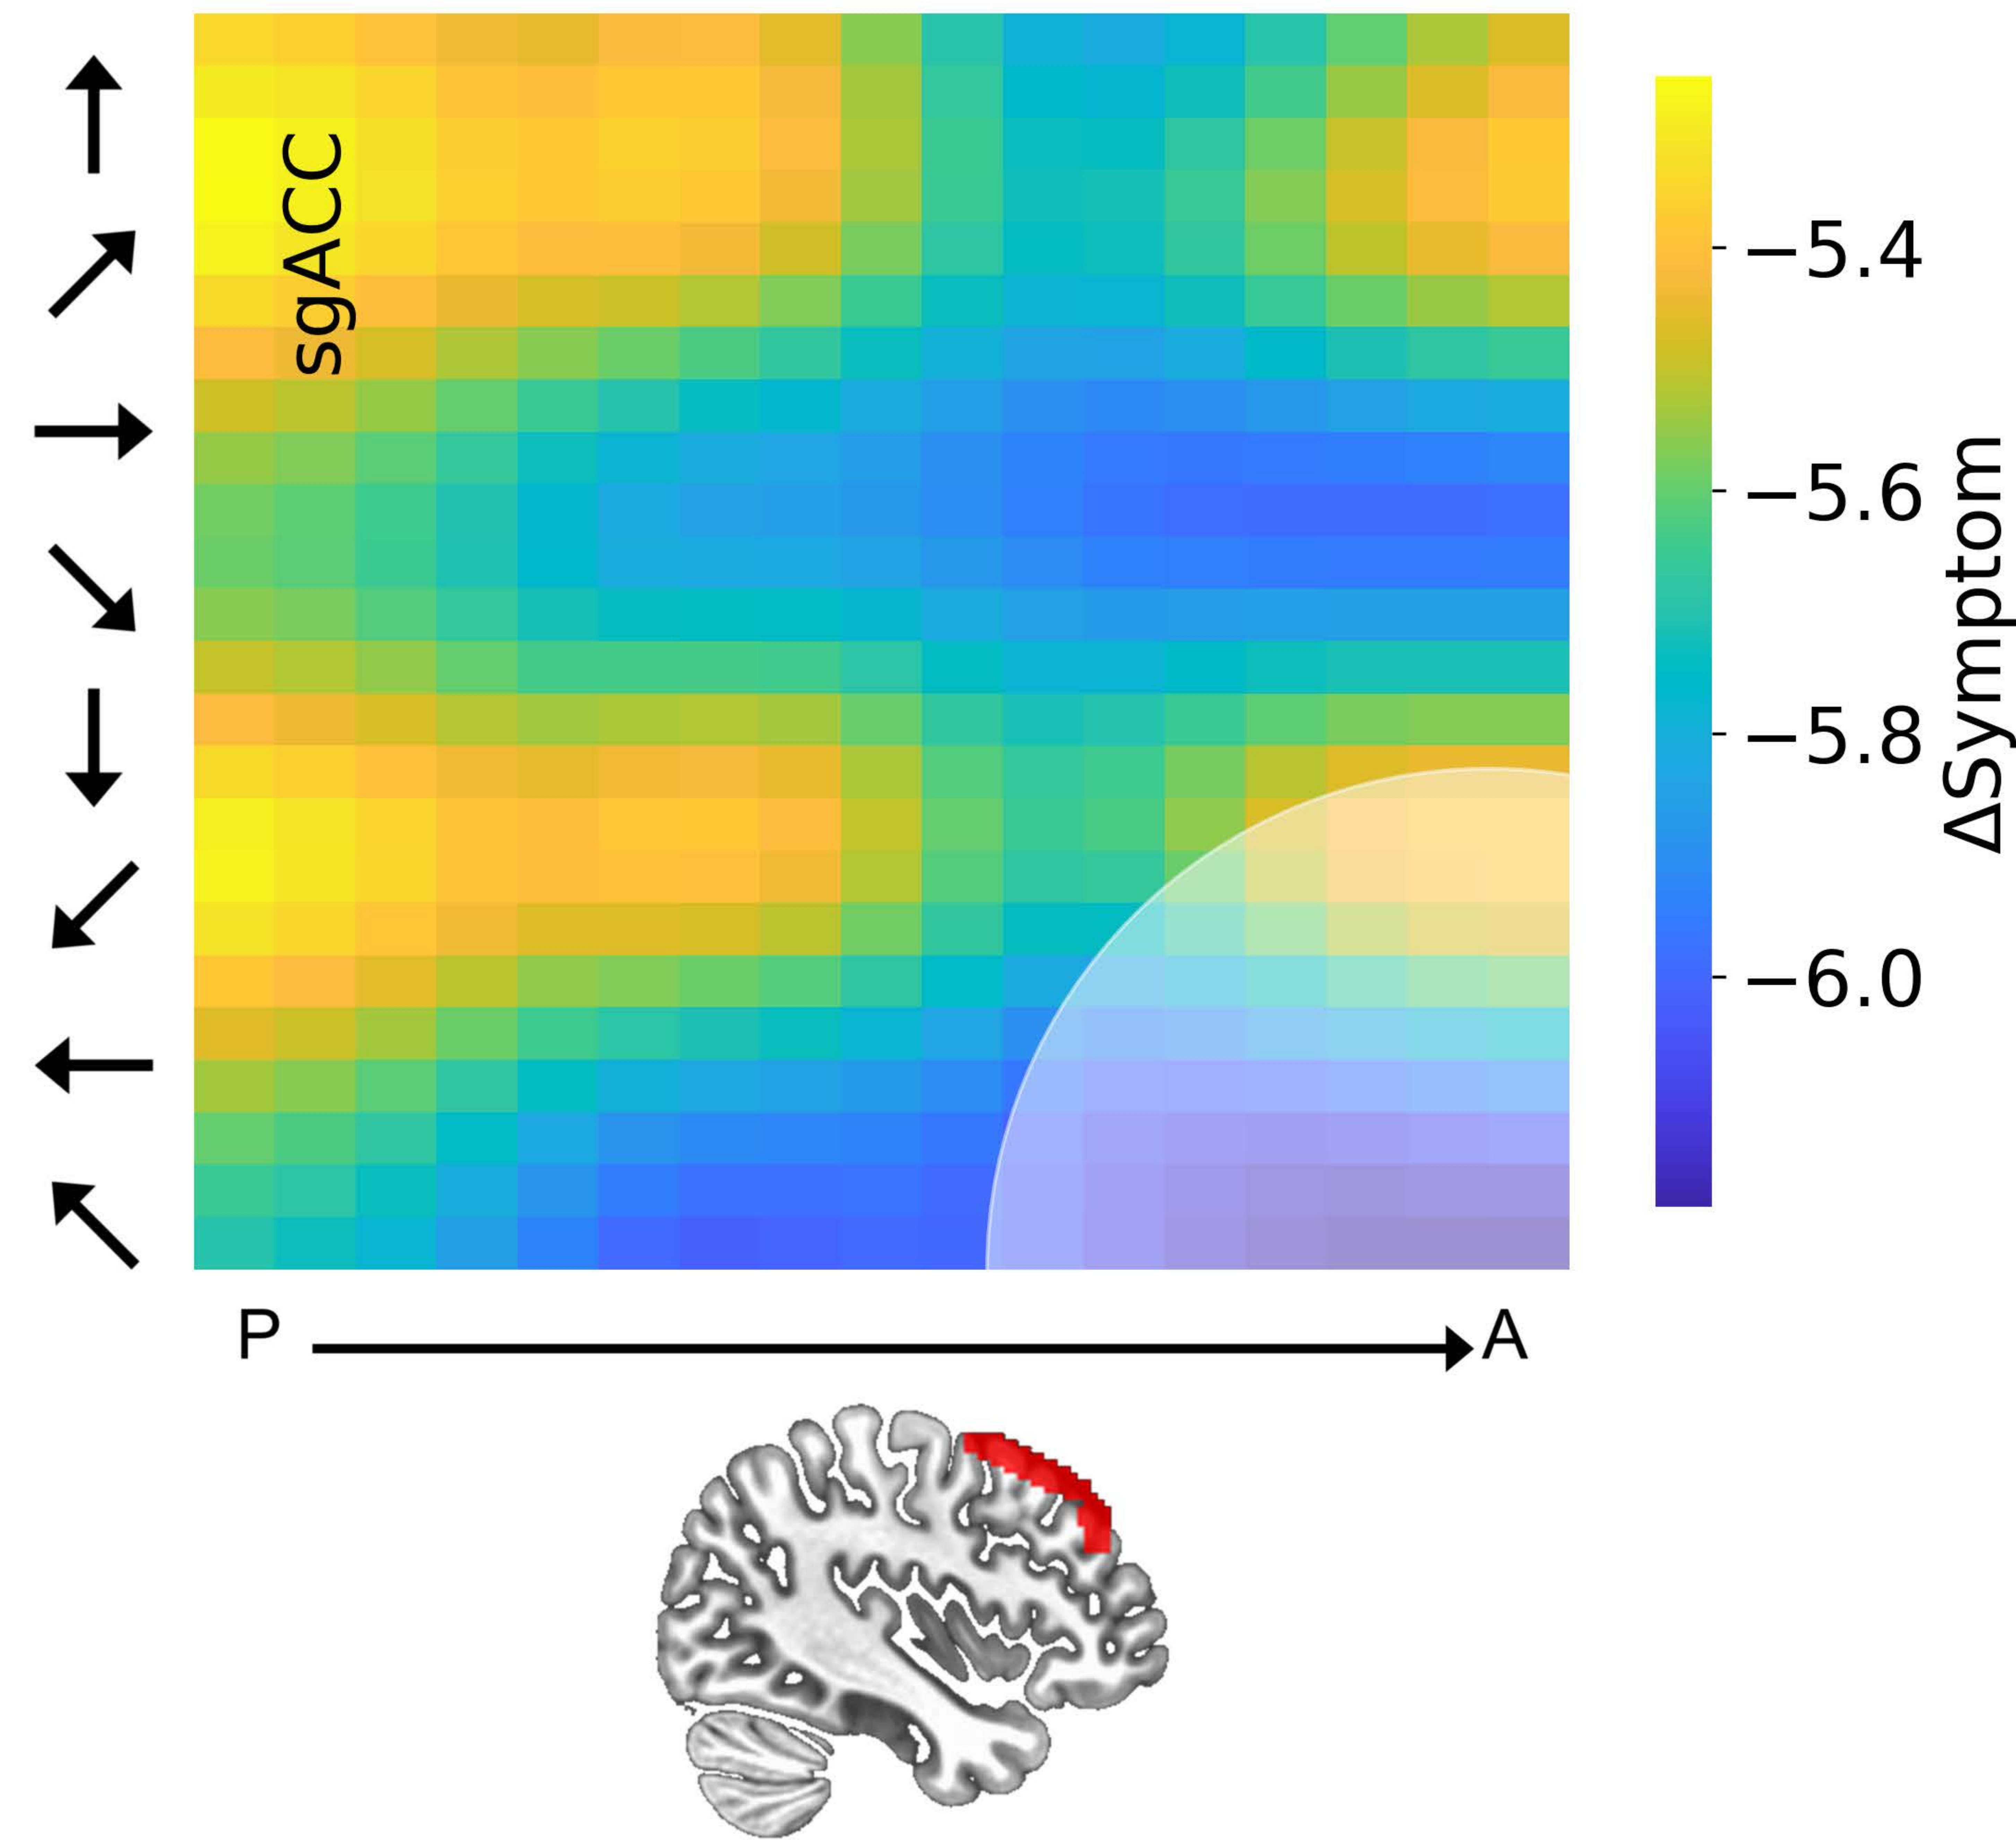



# NDAREZ915JK5\_hamd\_right\_dlpfc

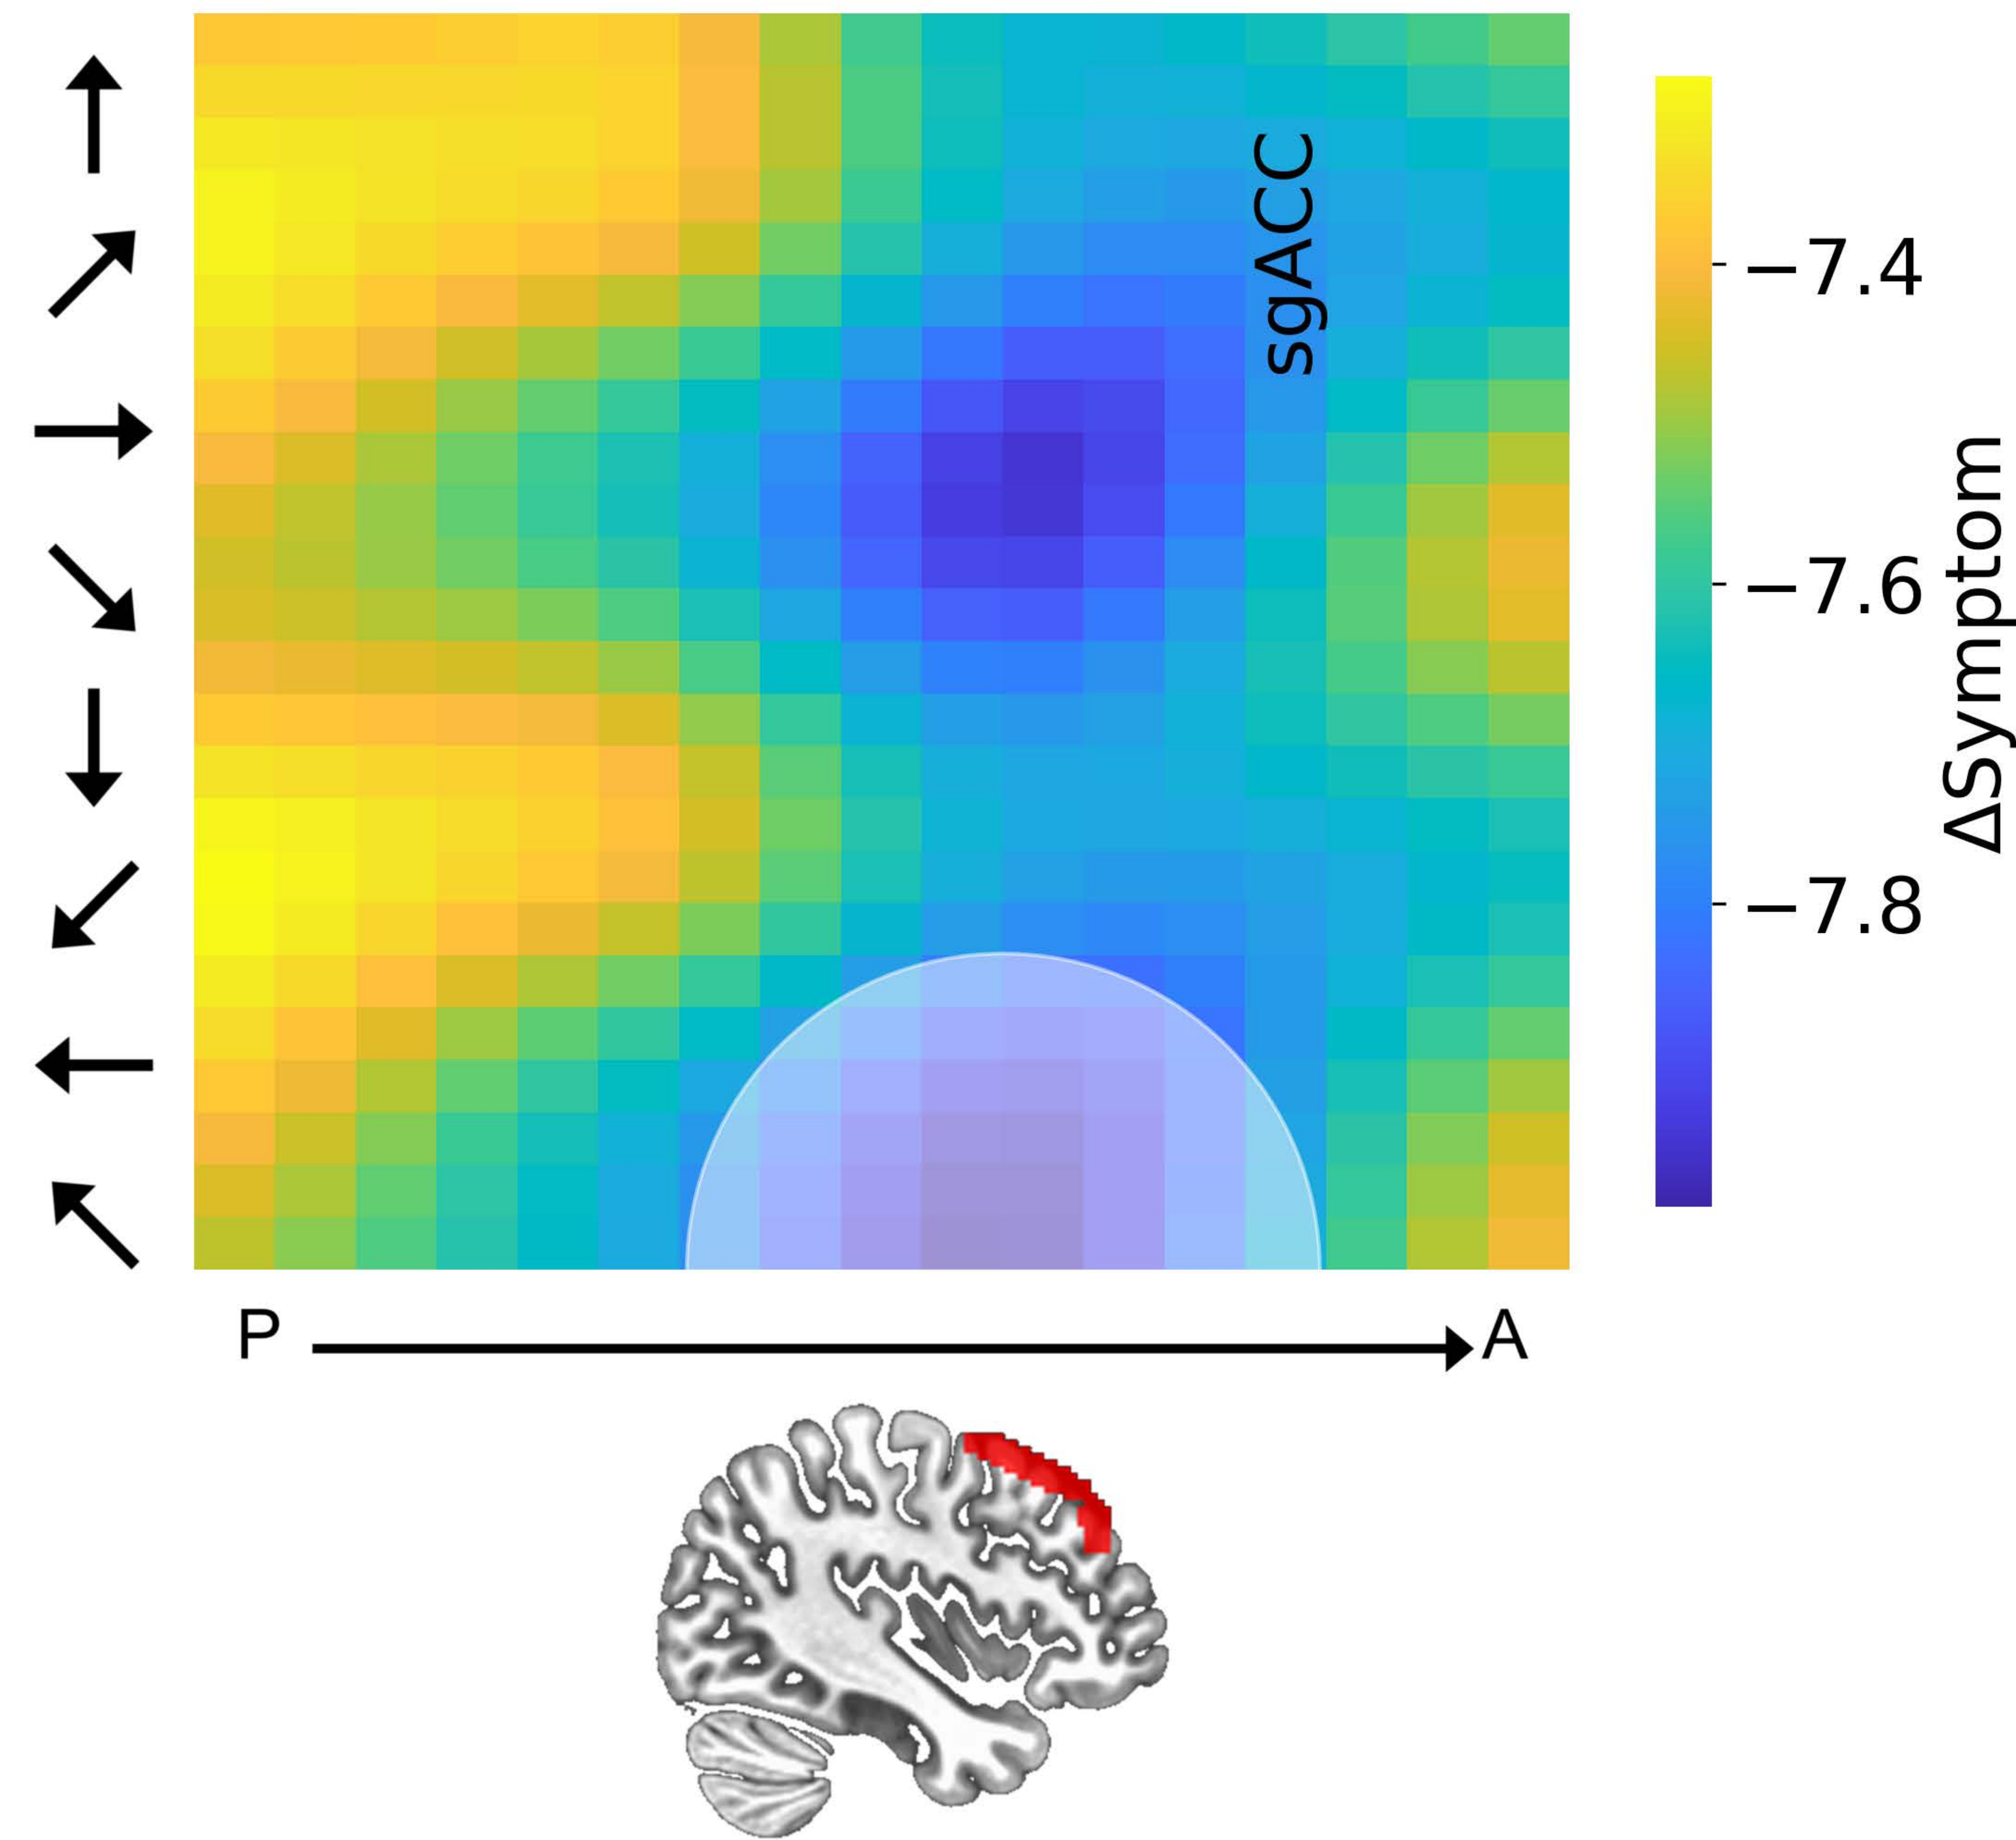



# INDARFH525MFZ\_hamd\_right\_dlpfc

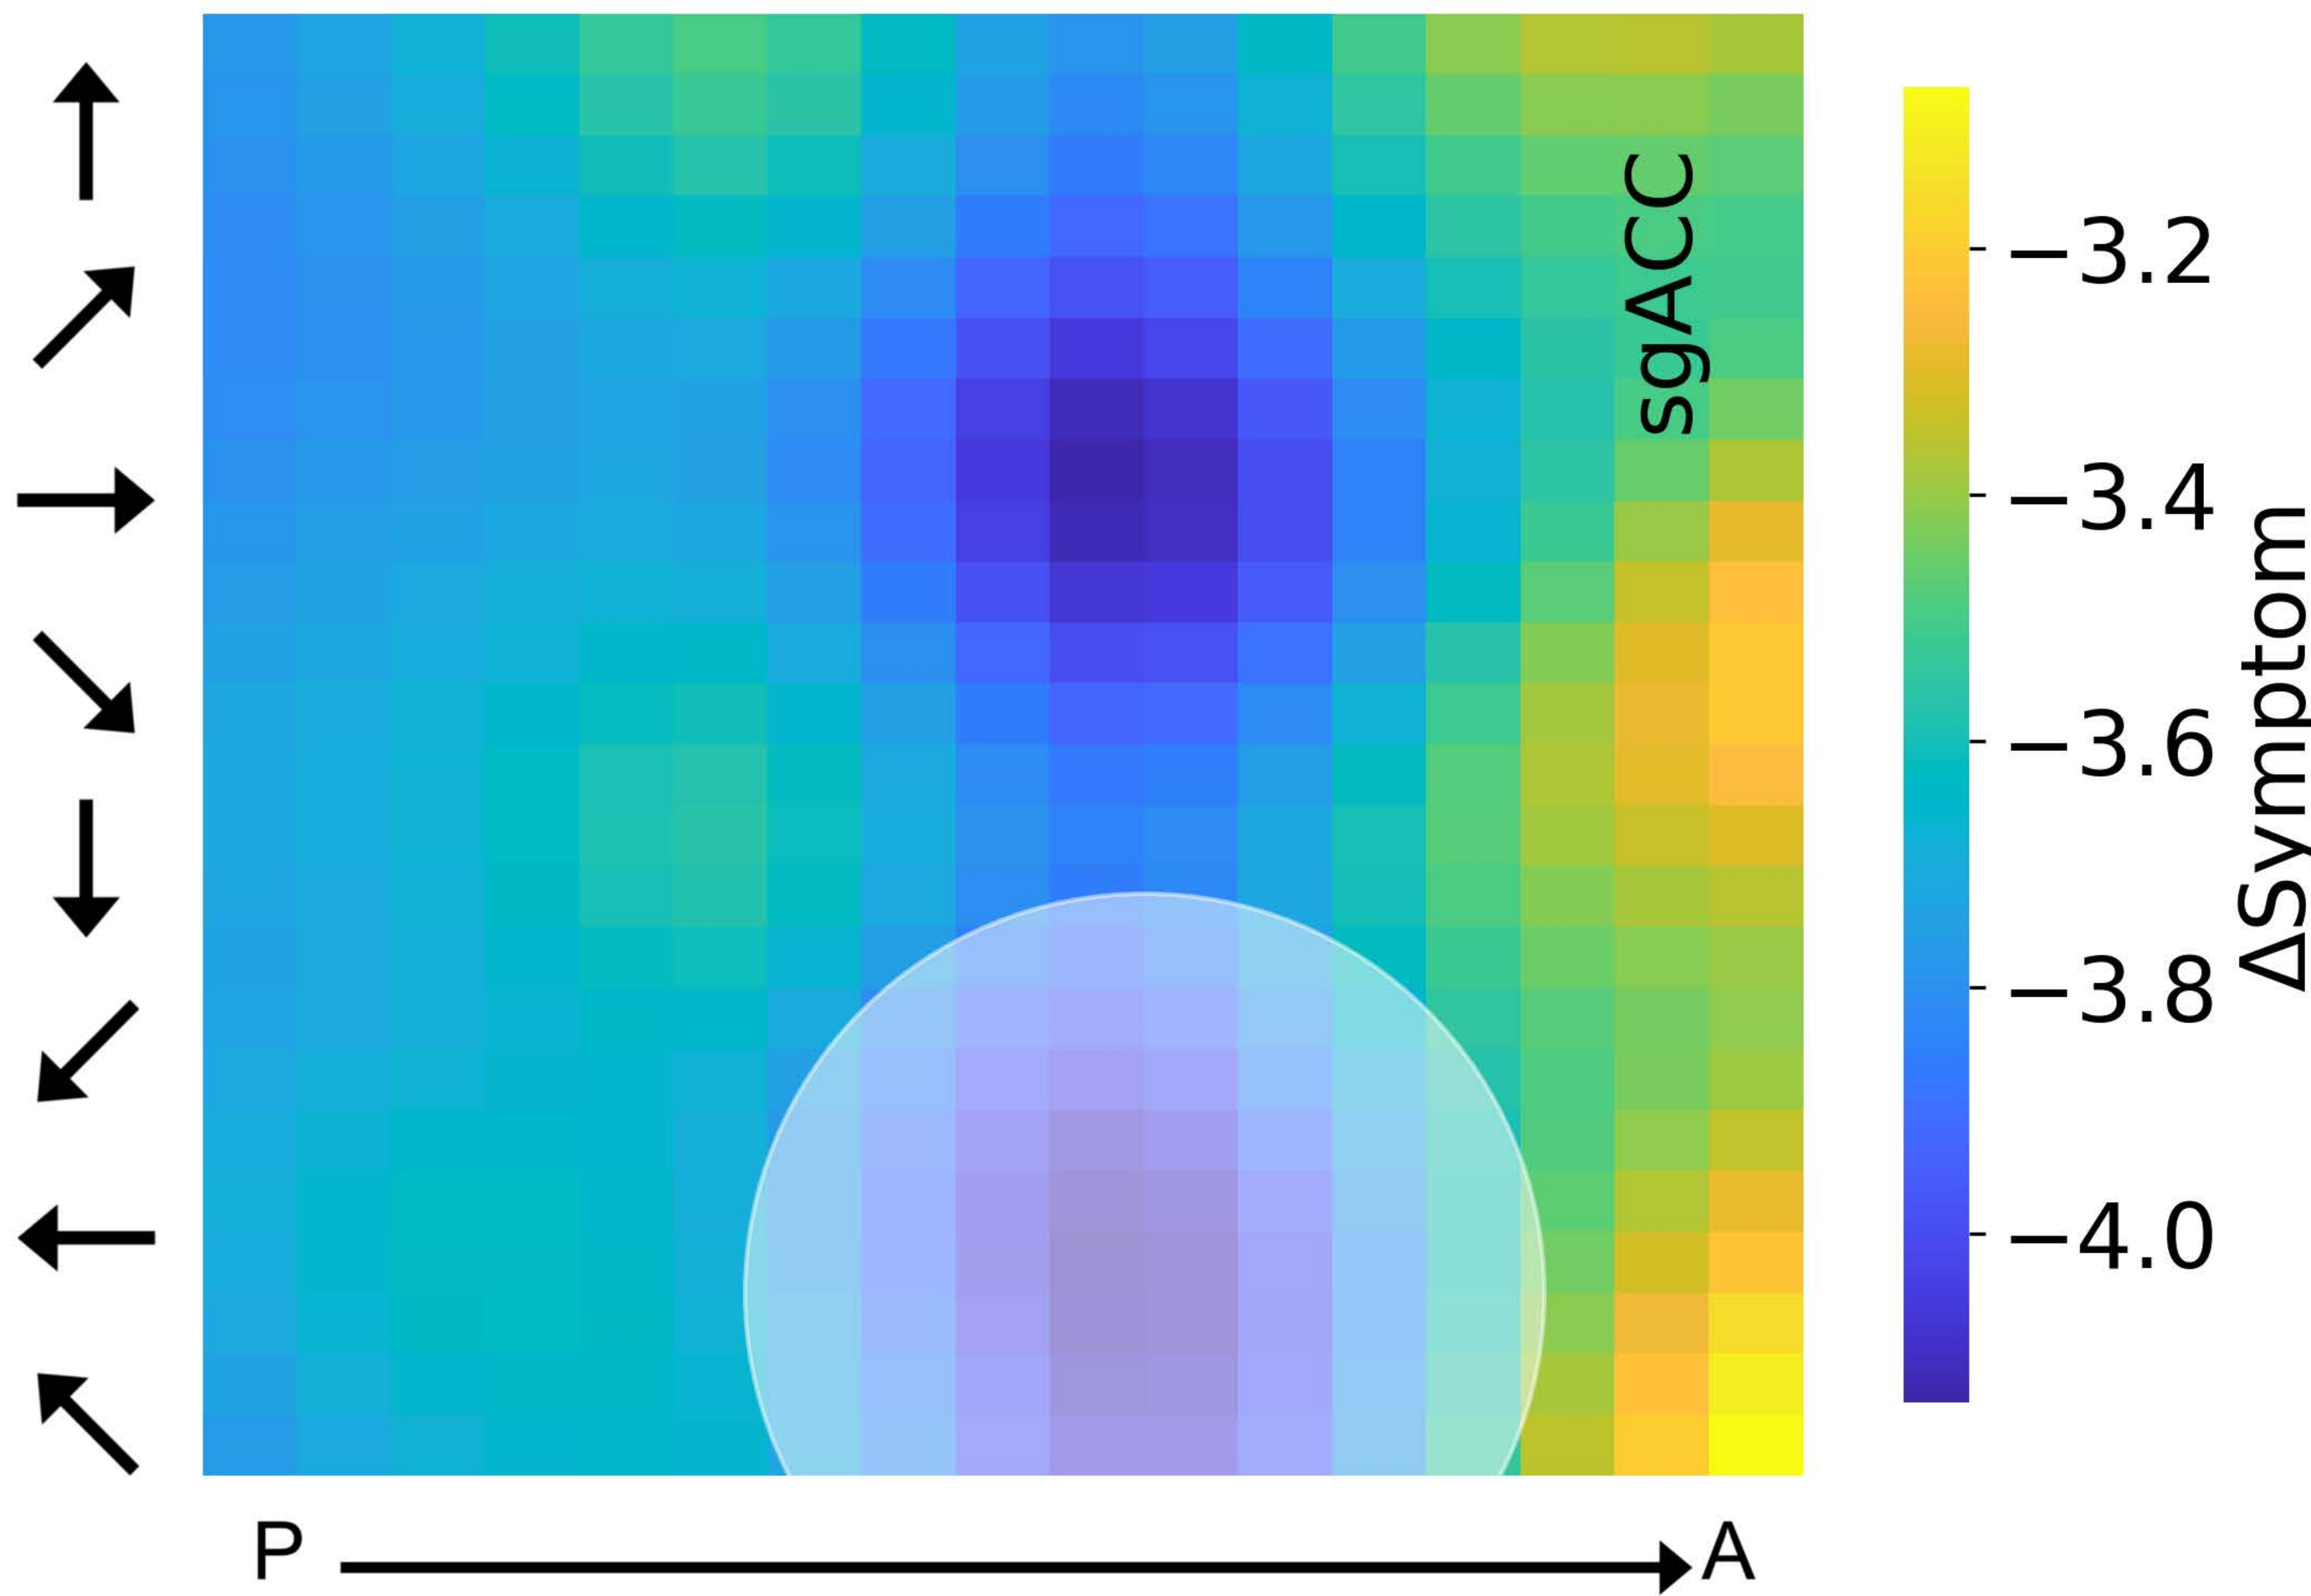



# INDARFR746ENQ\_hamd\_right\_dlpfc

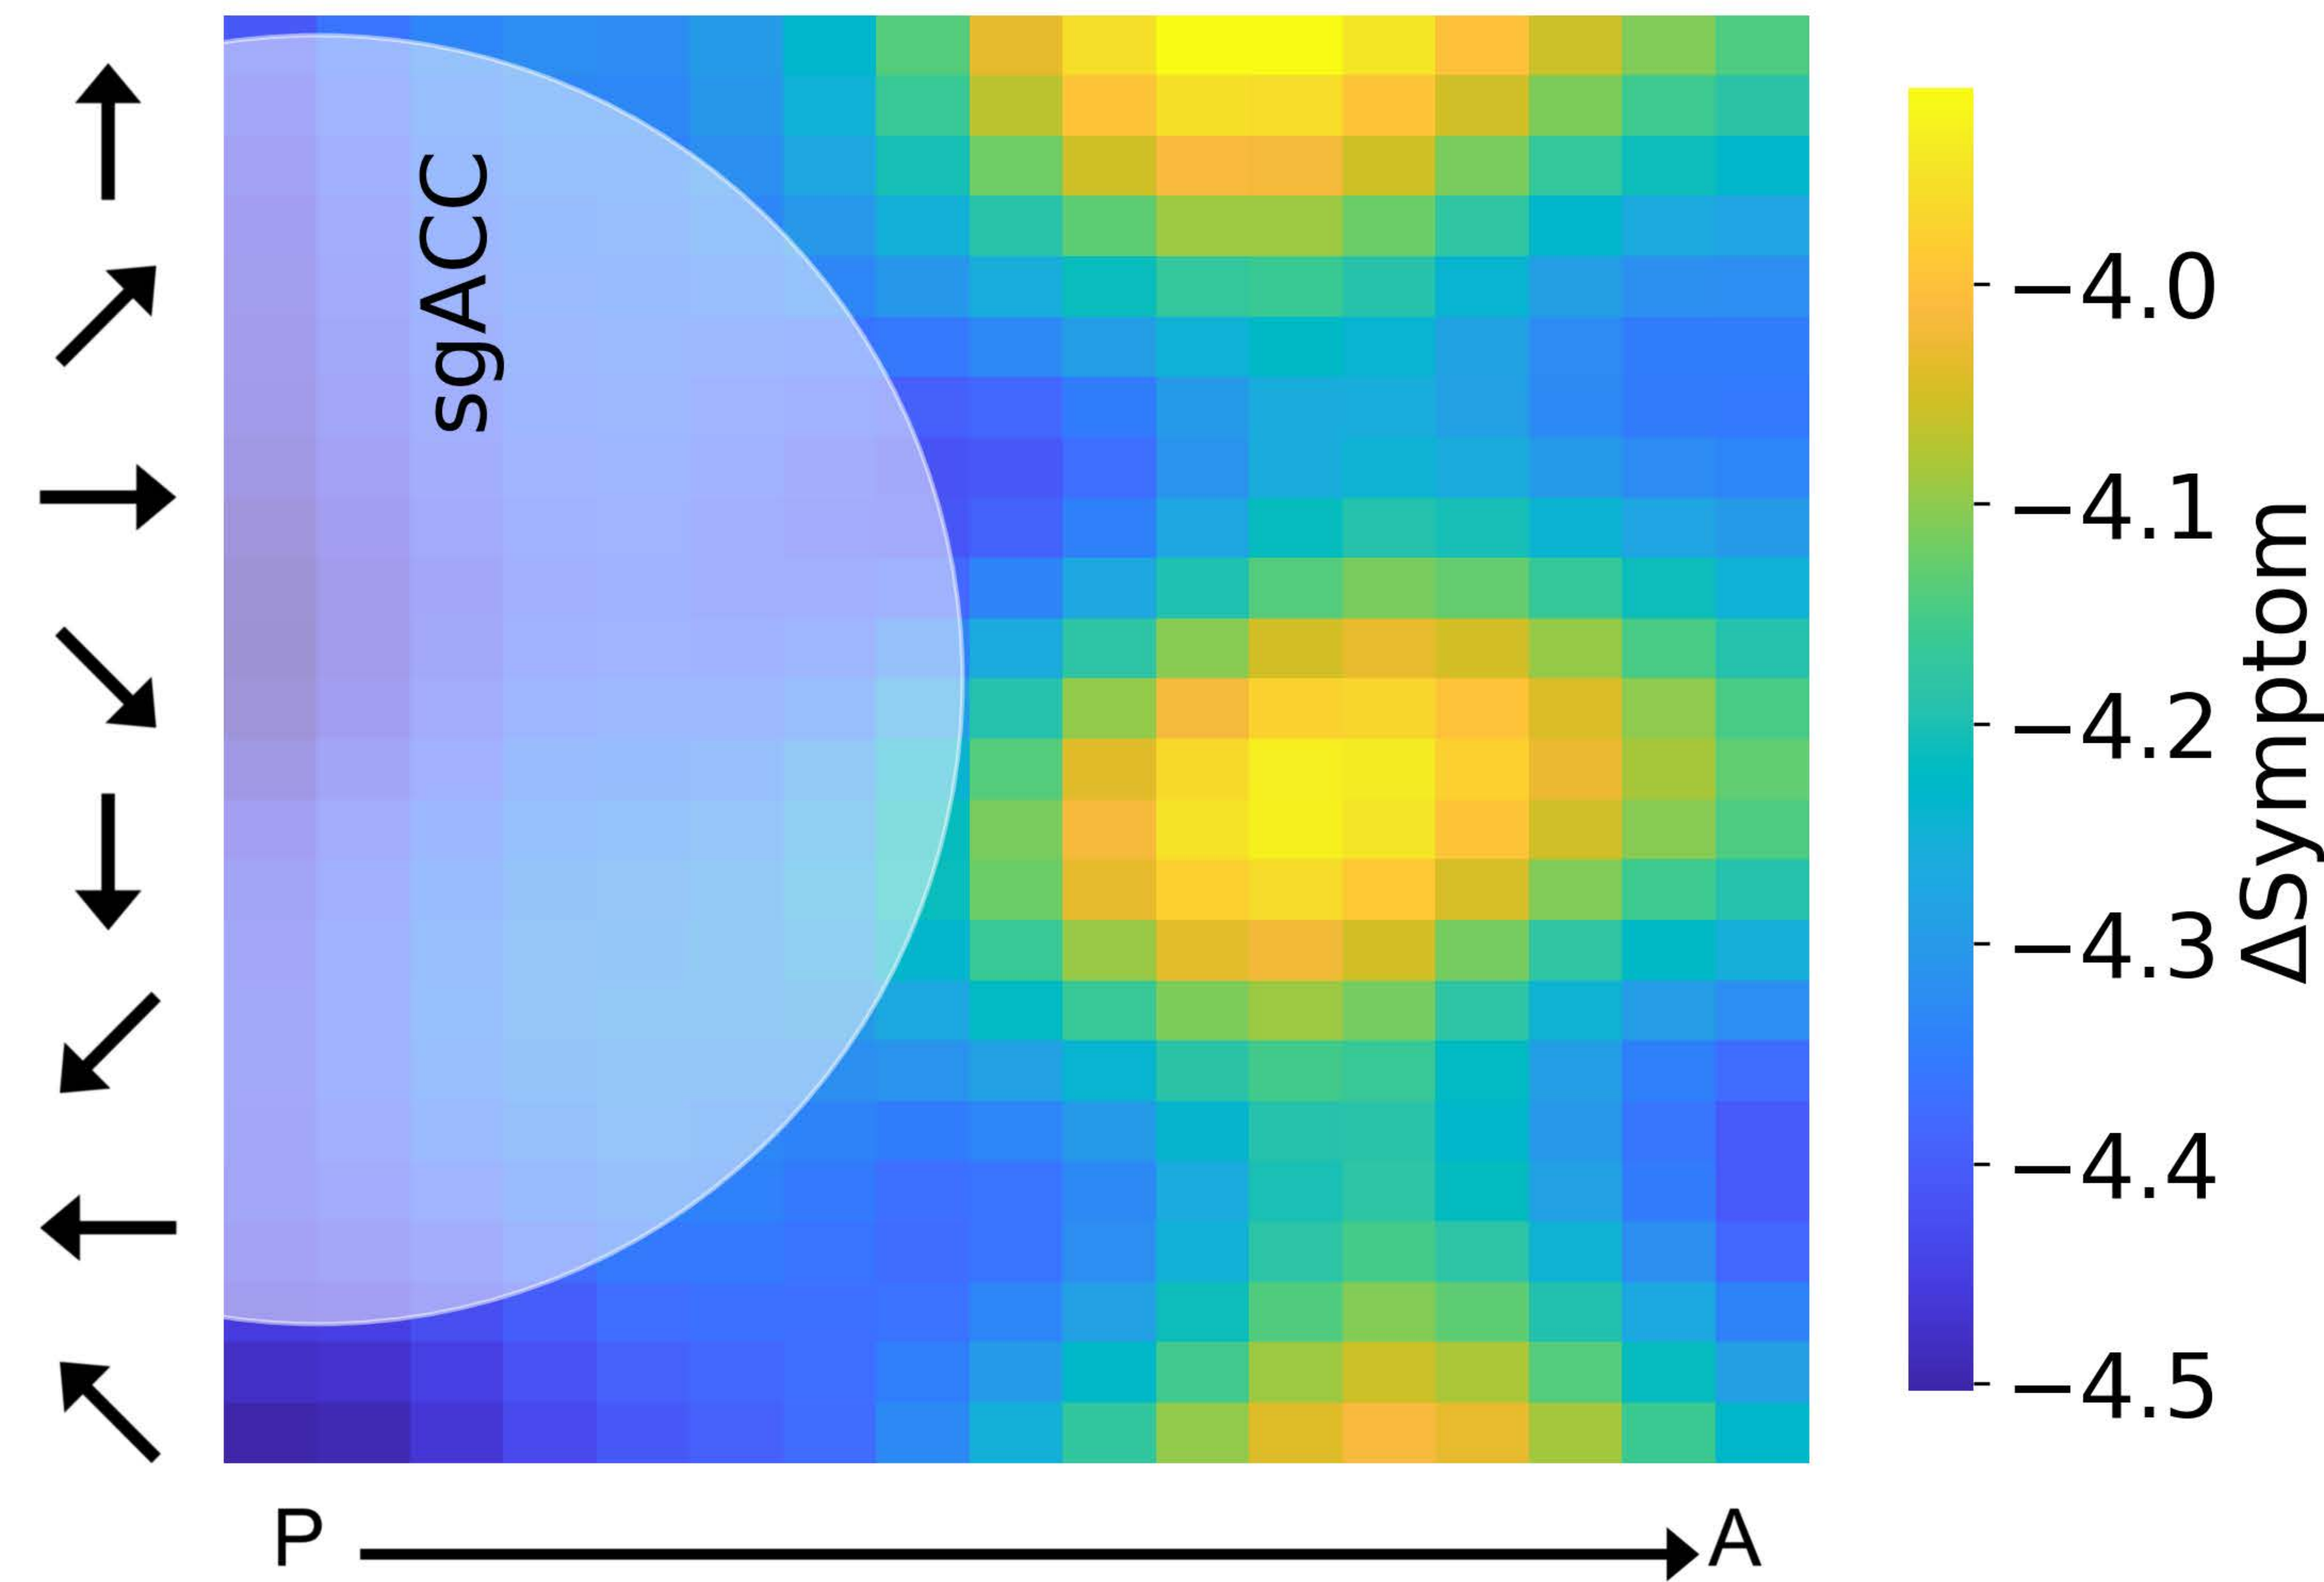



# INDARFW096LMD\_hamd\_right\_dlpfc

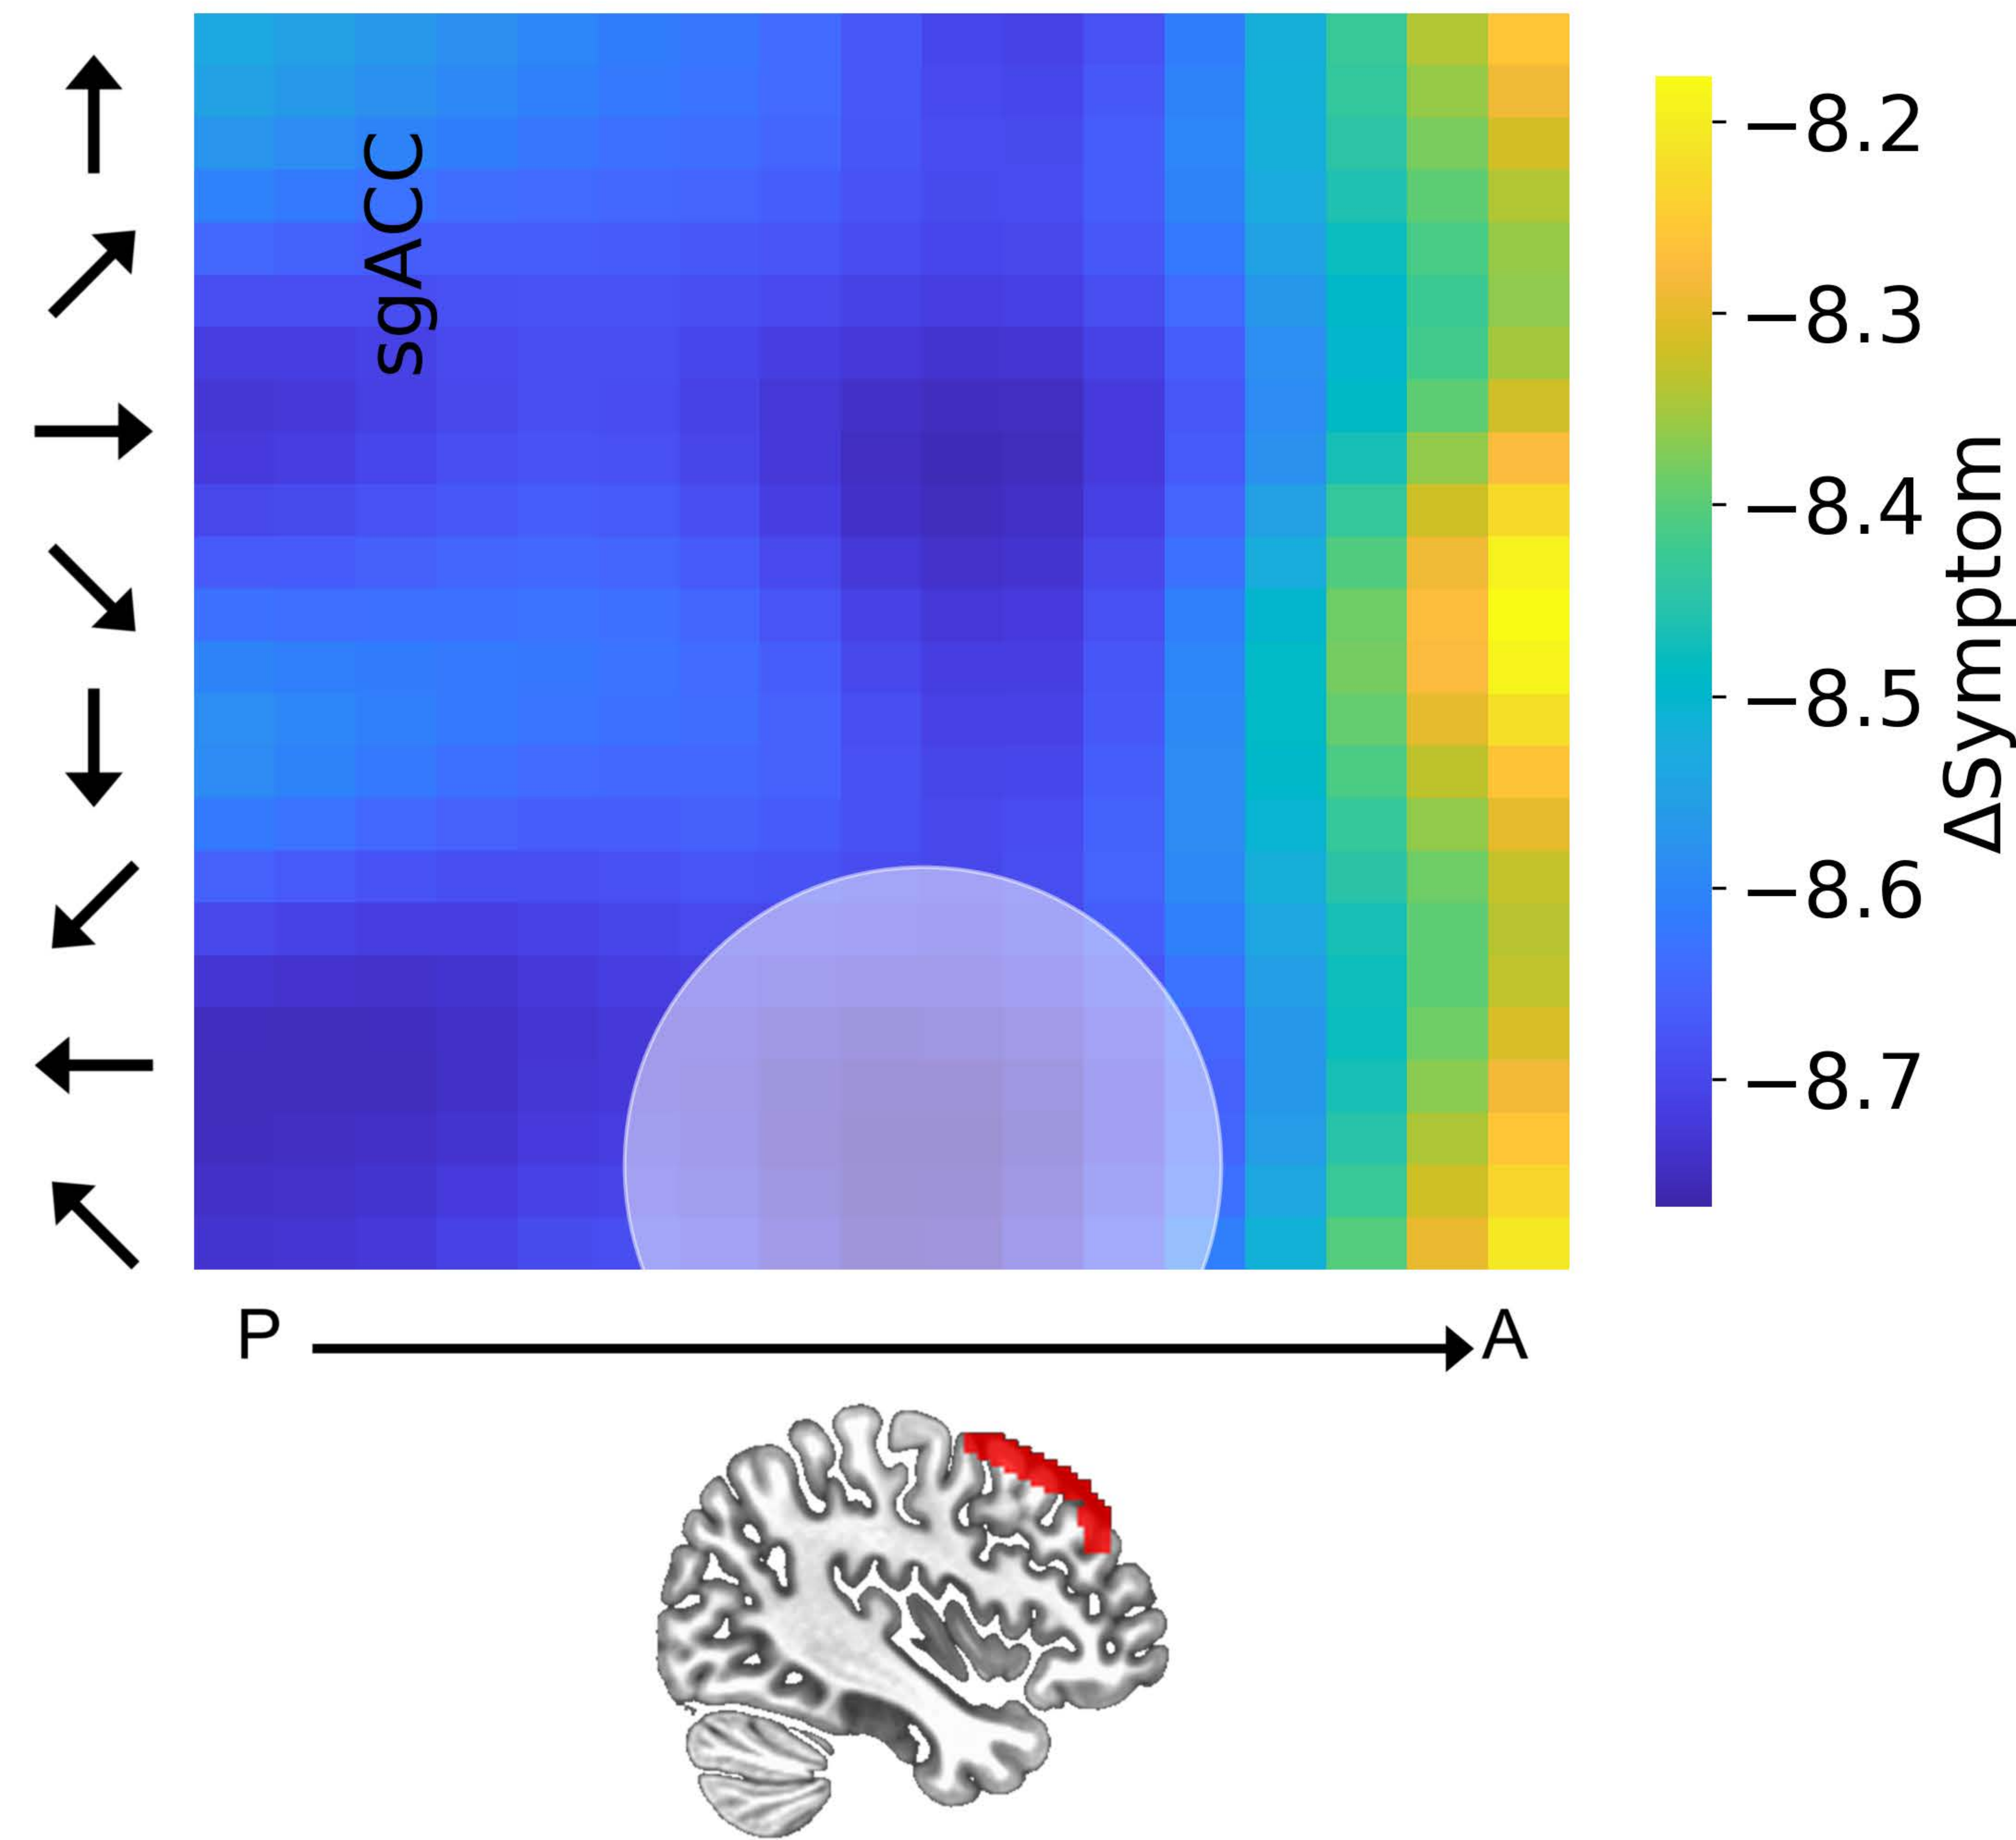



# NDARGH895WJJ\_hamd\_right\_dlpfc

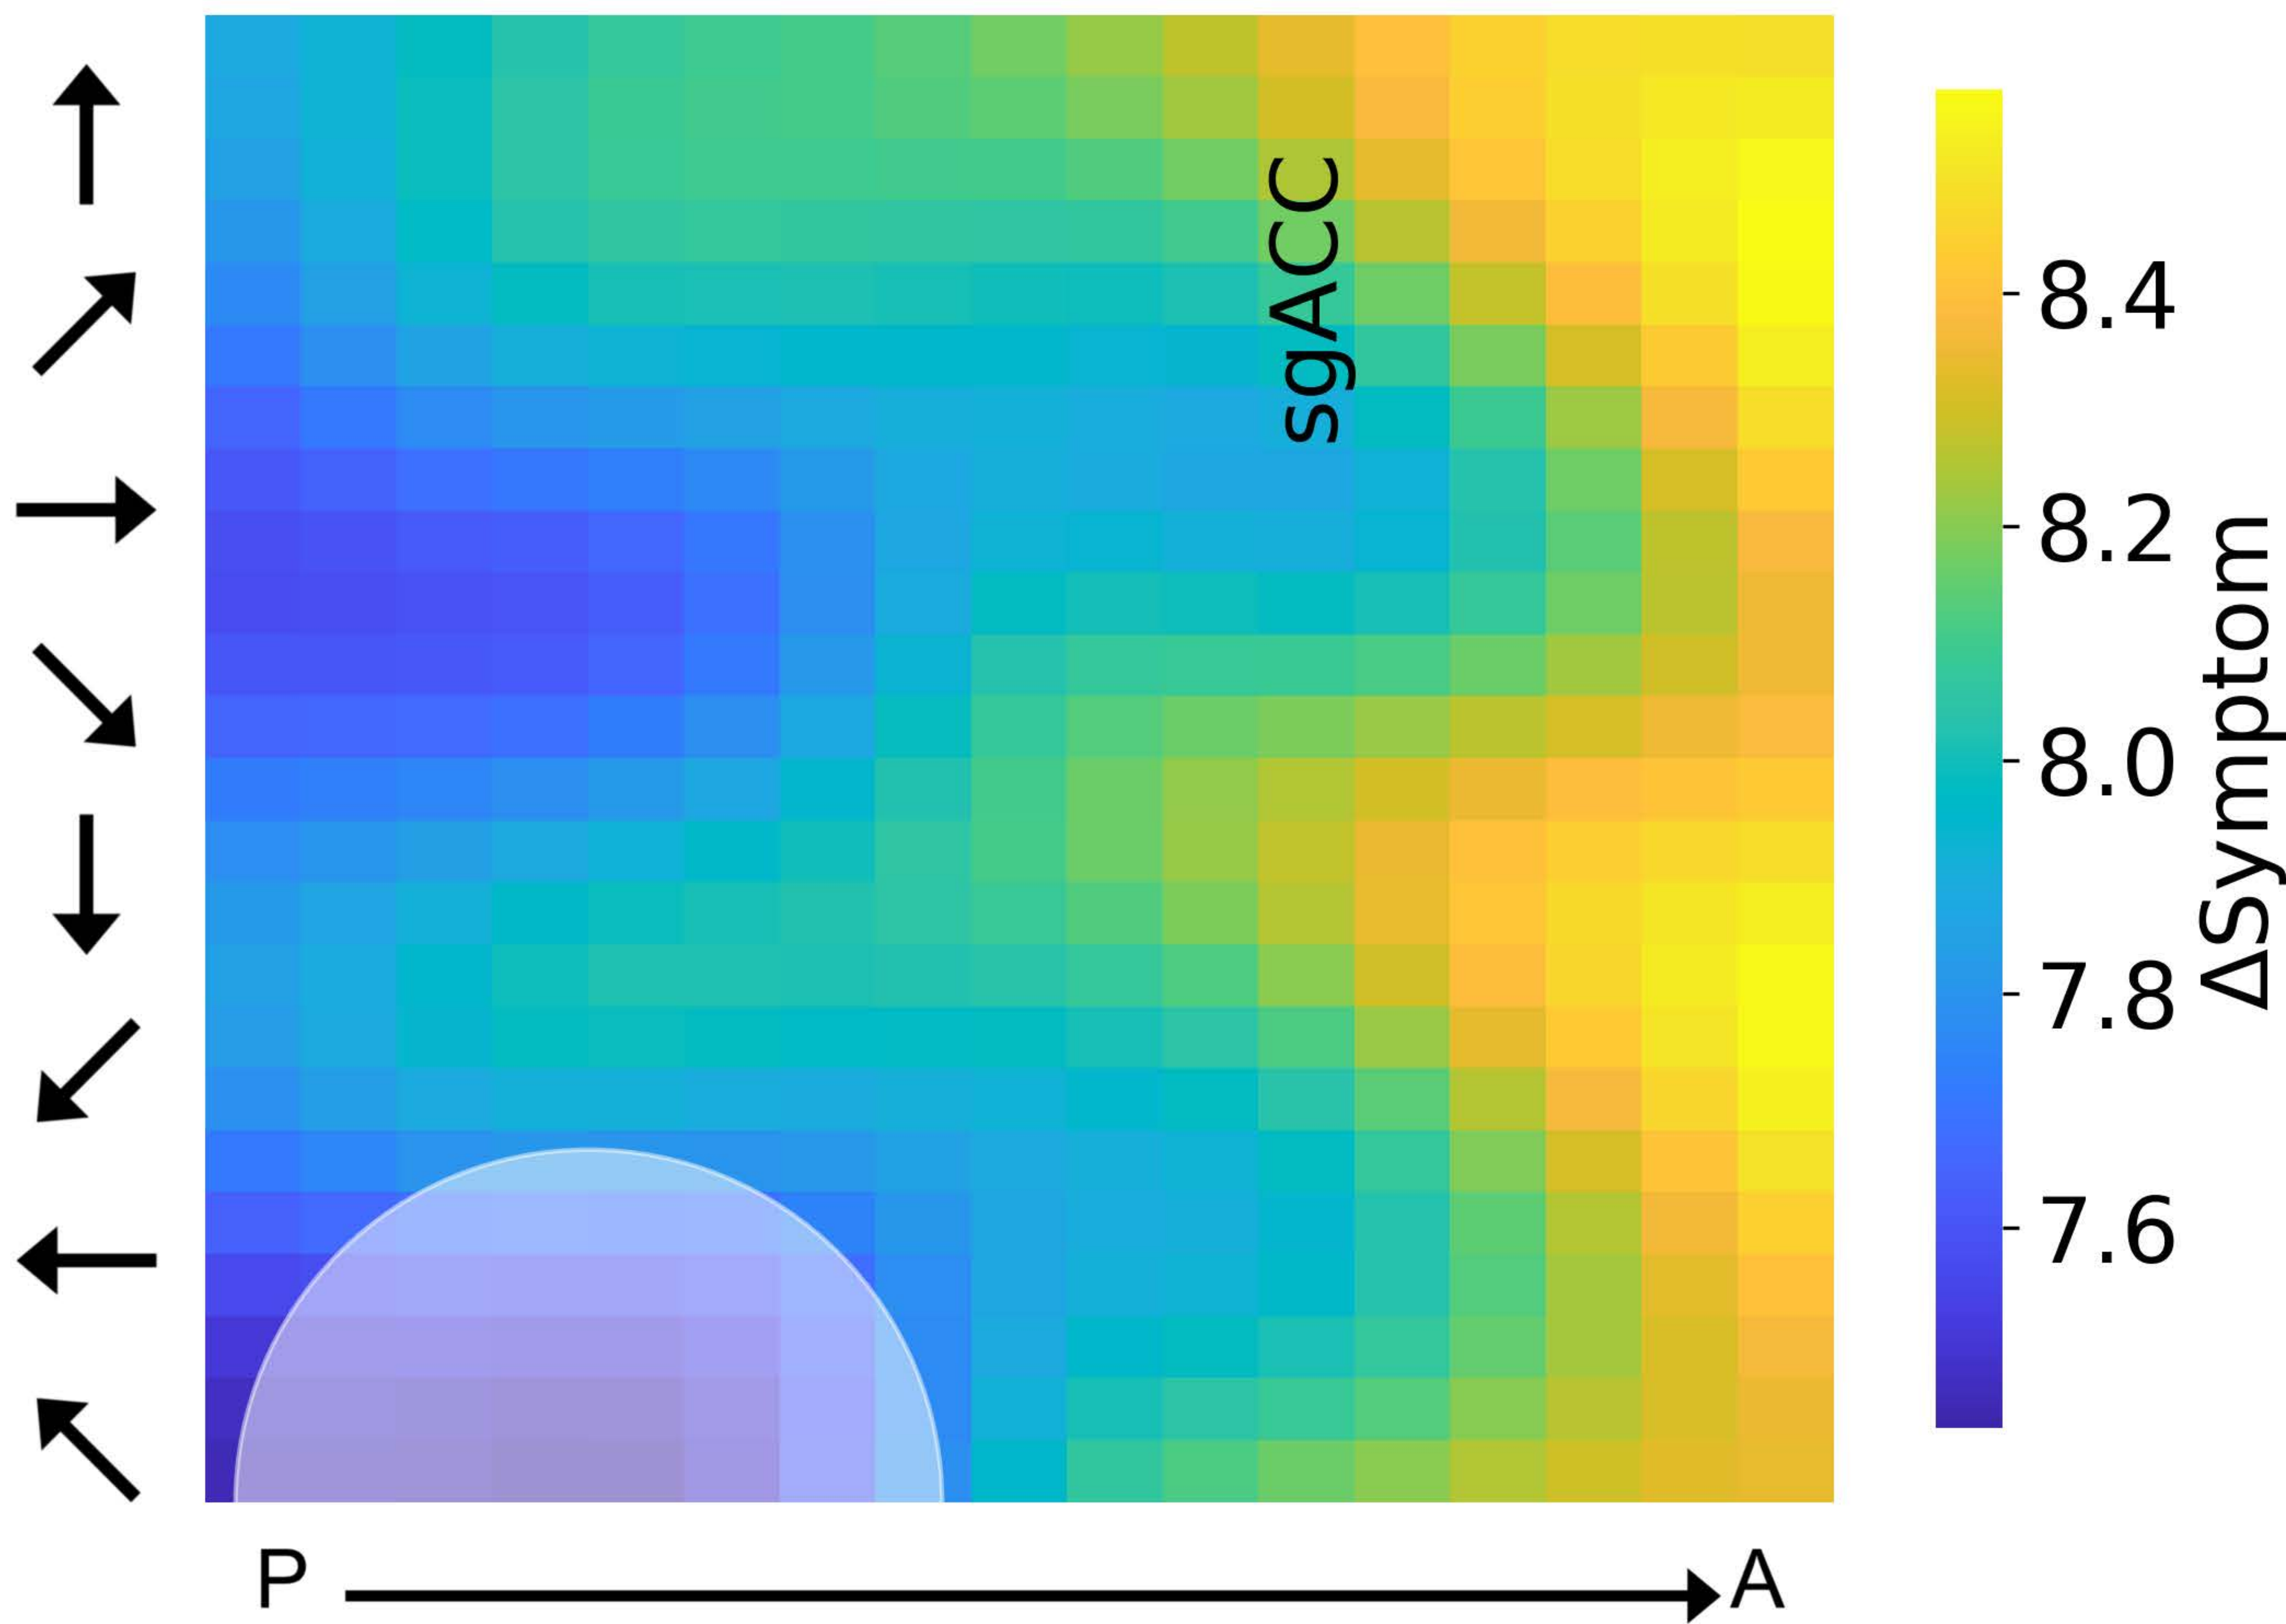



# NDARGR637FTT\_hamd\_right\_dlpfc

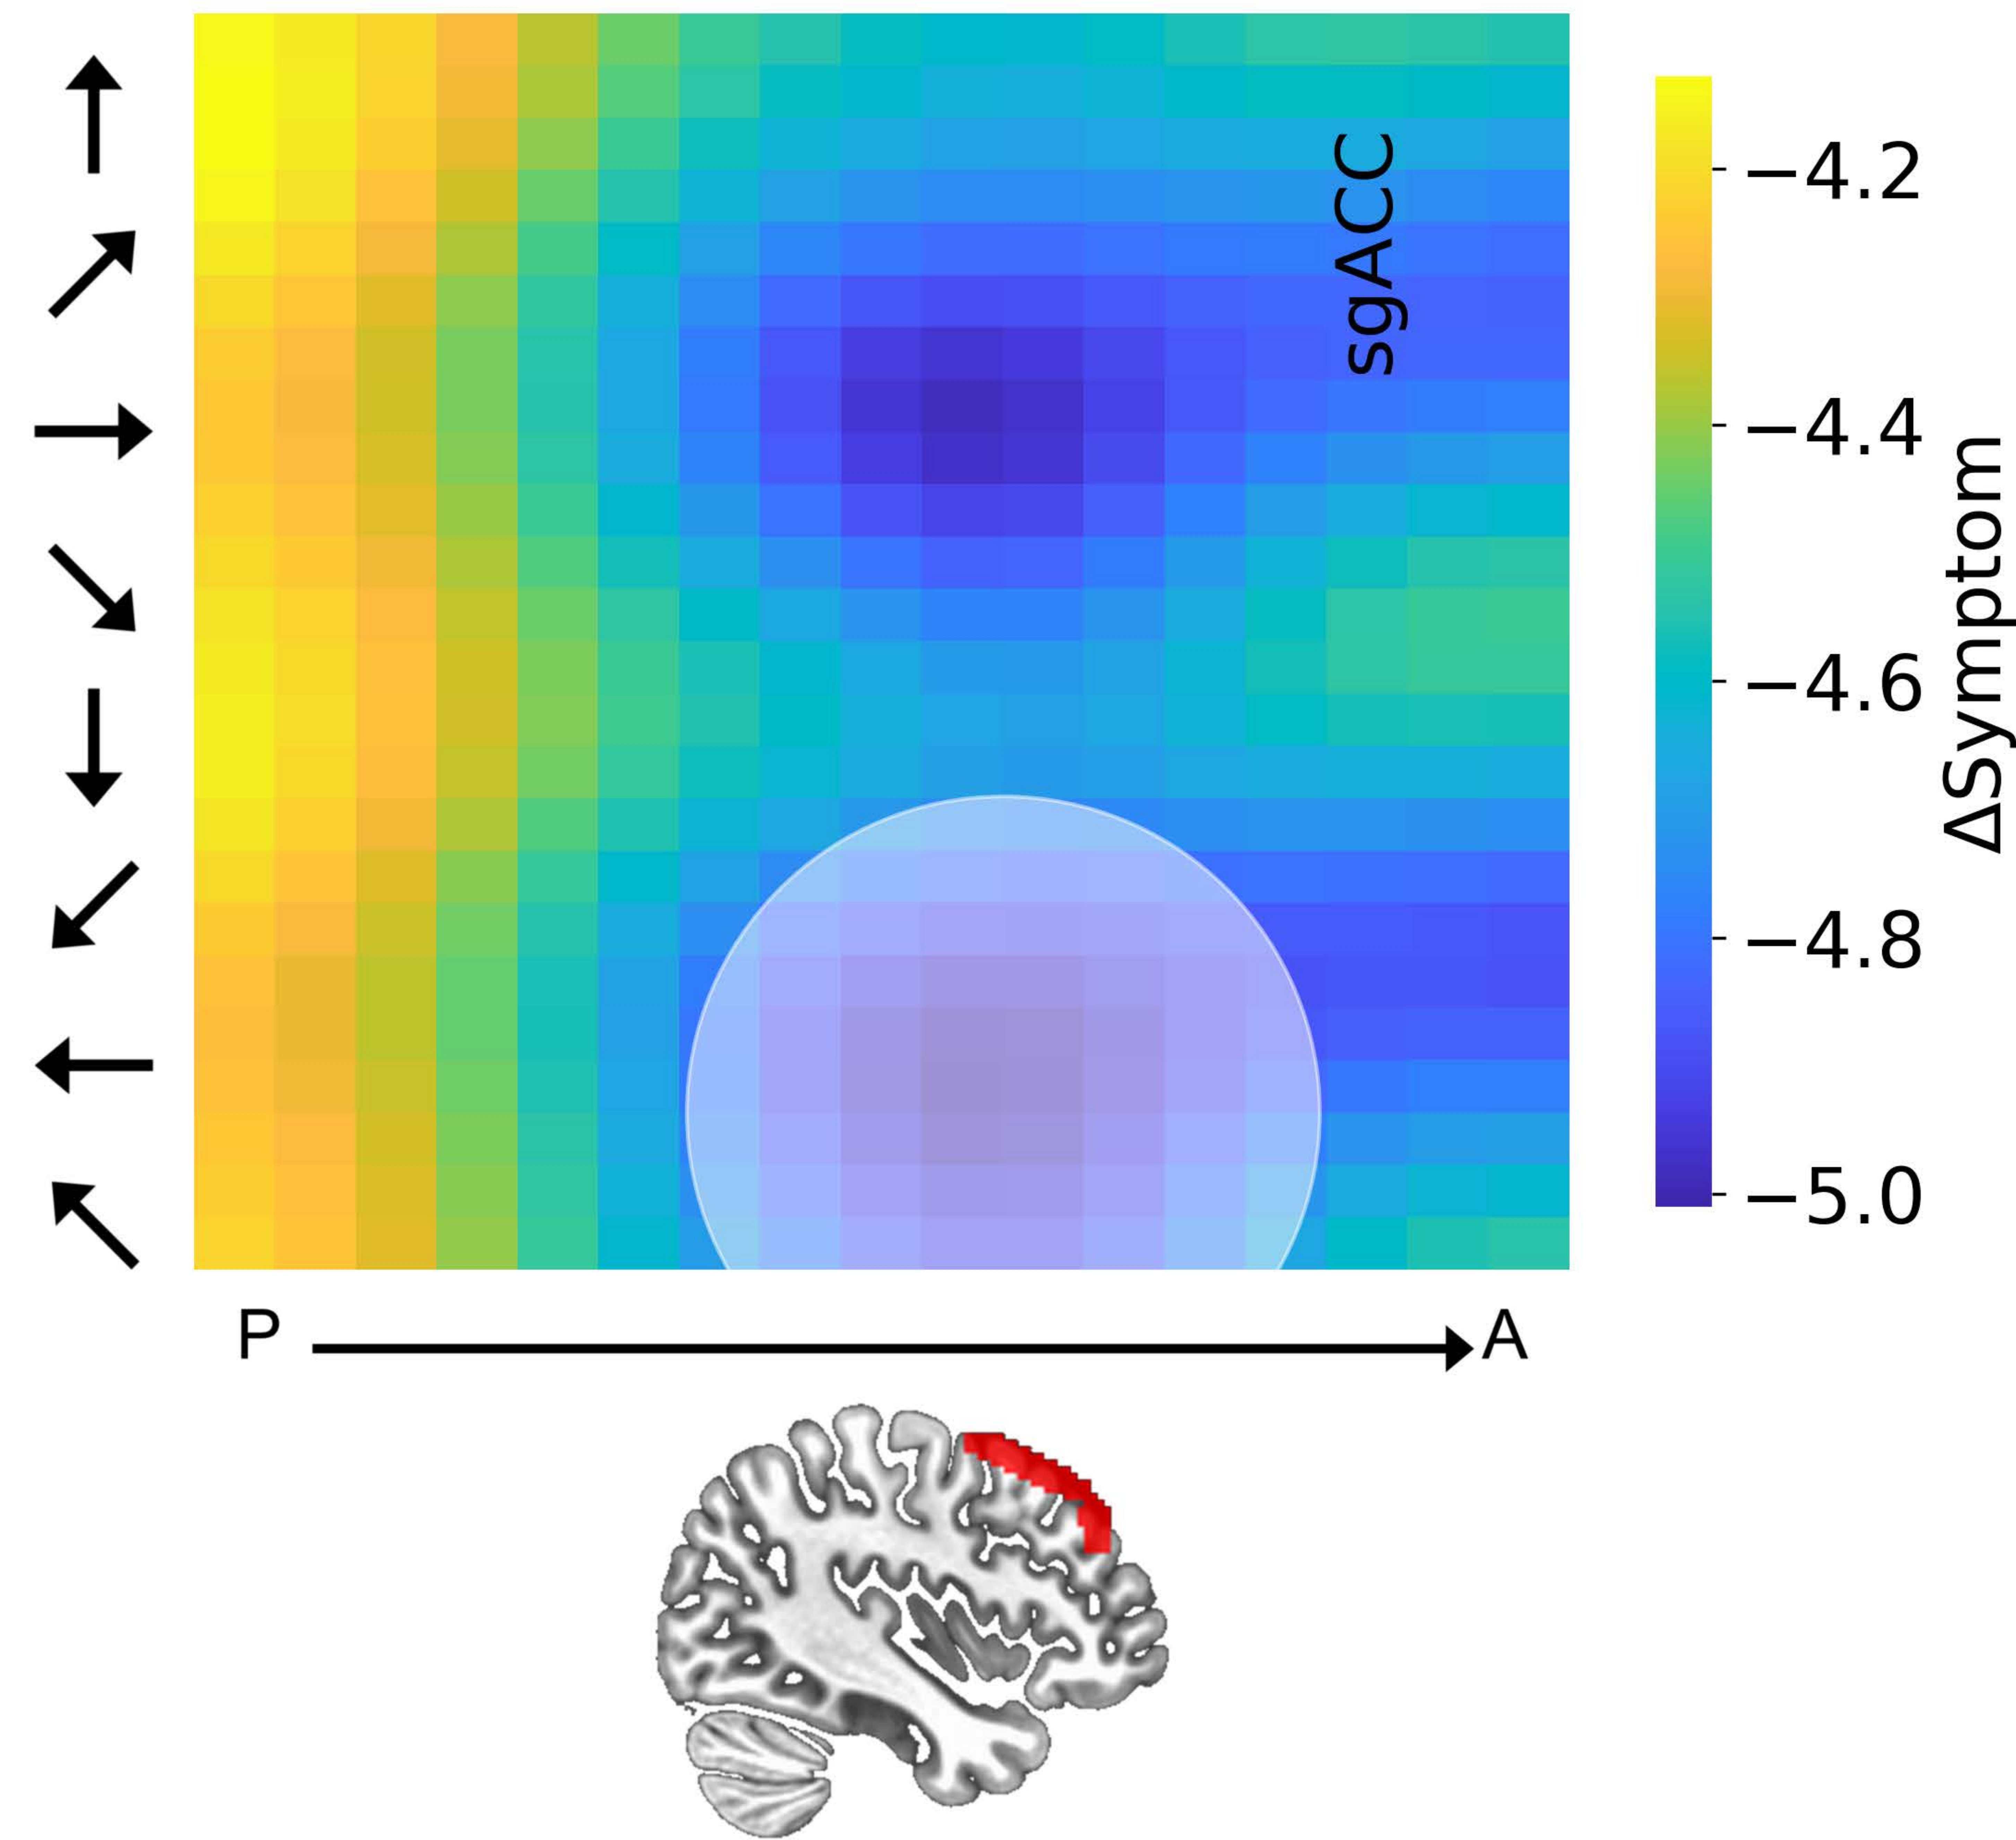



# NDARGR782ALD\_hamd\_right\_dlpfc

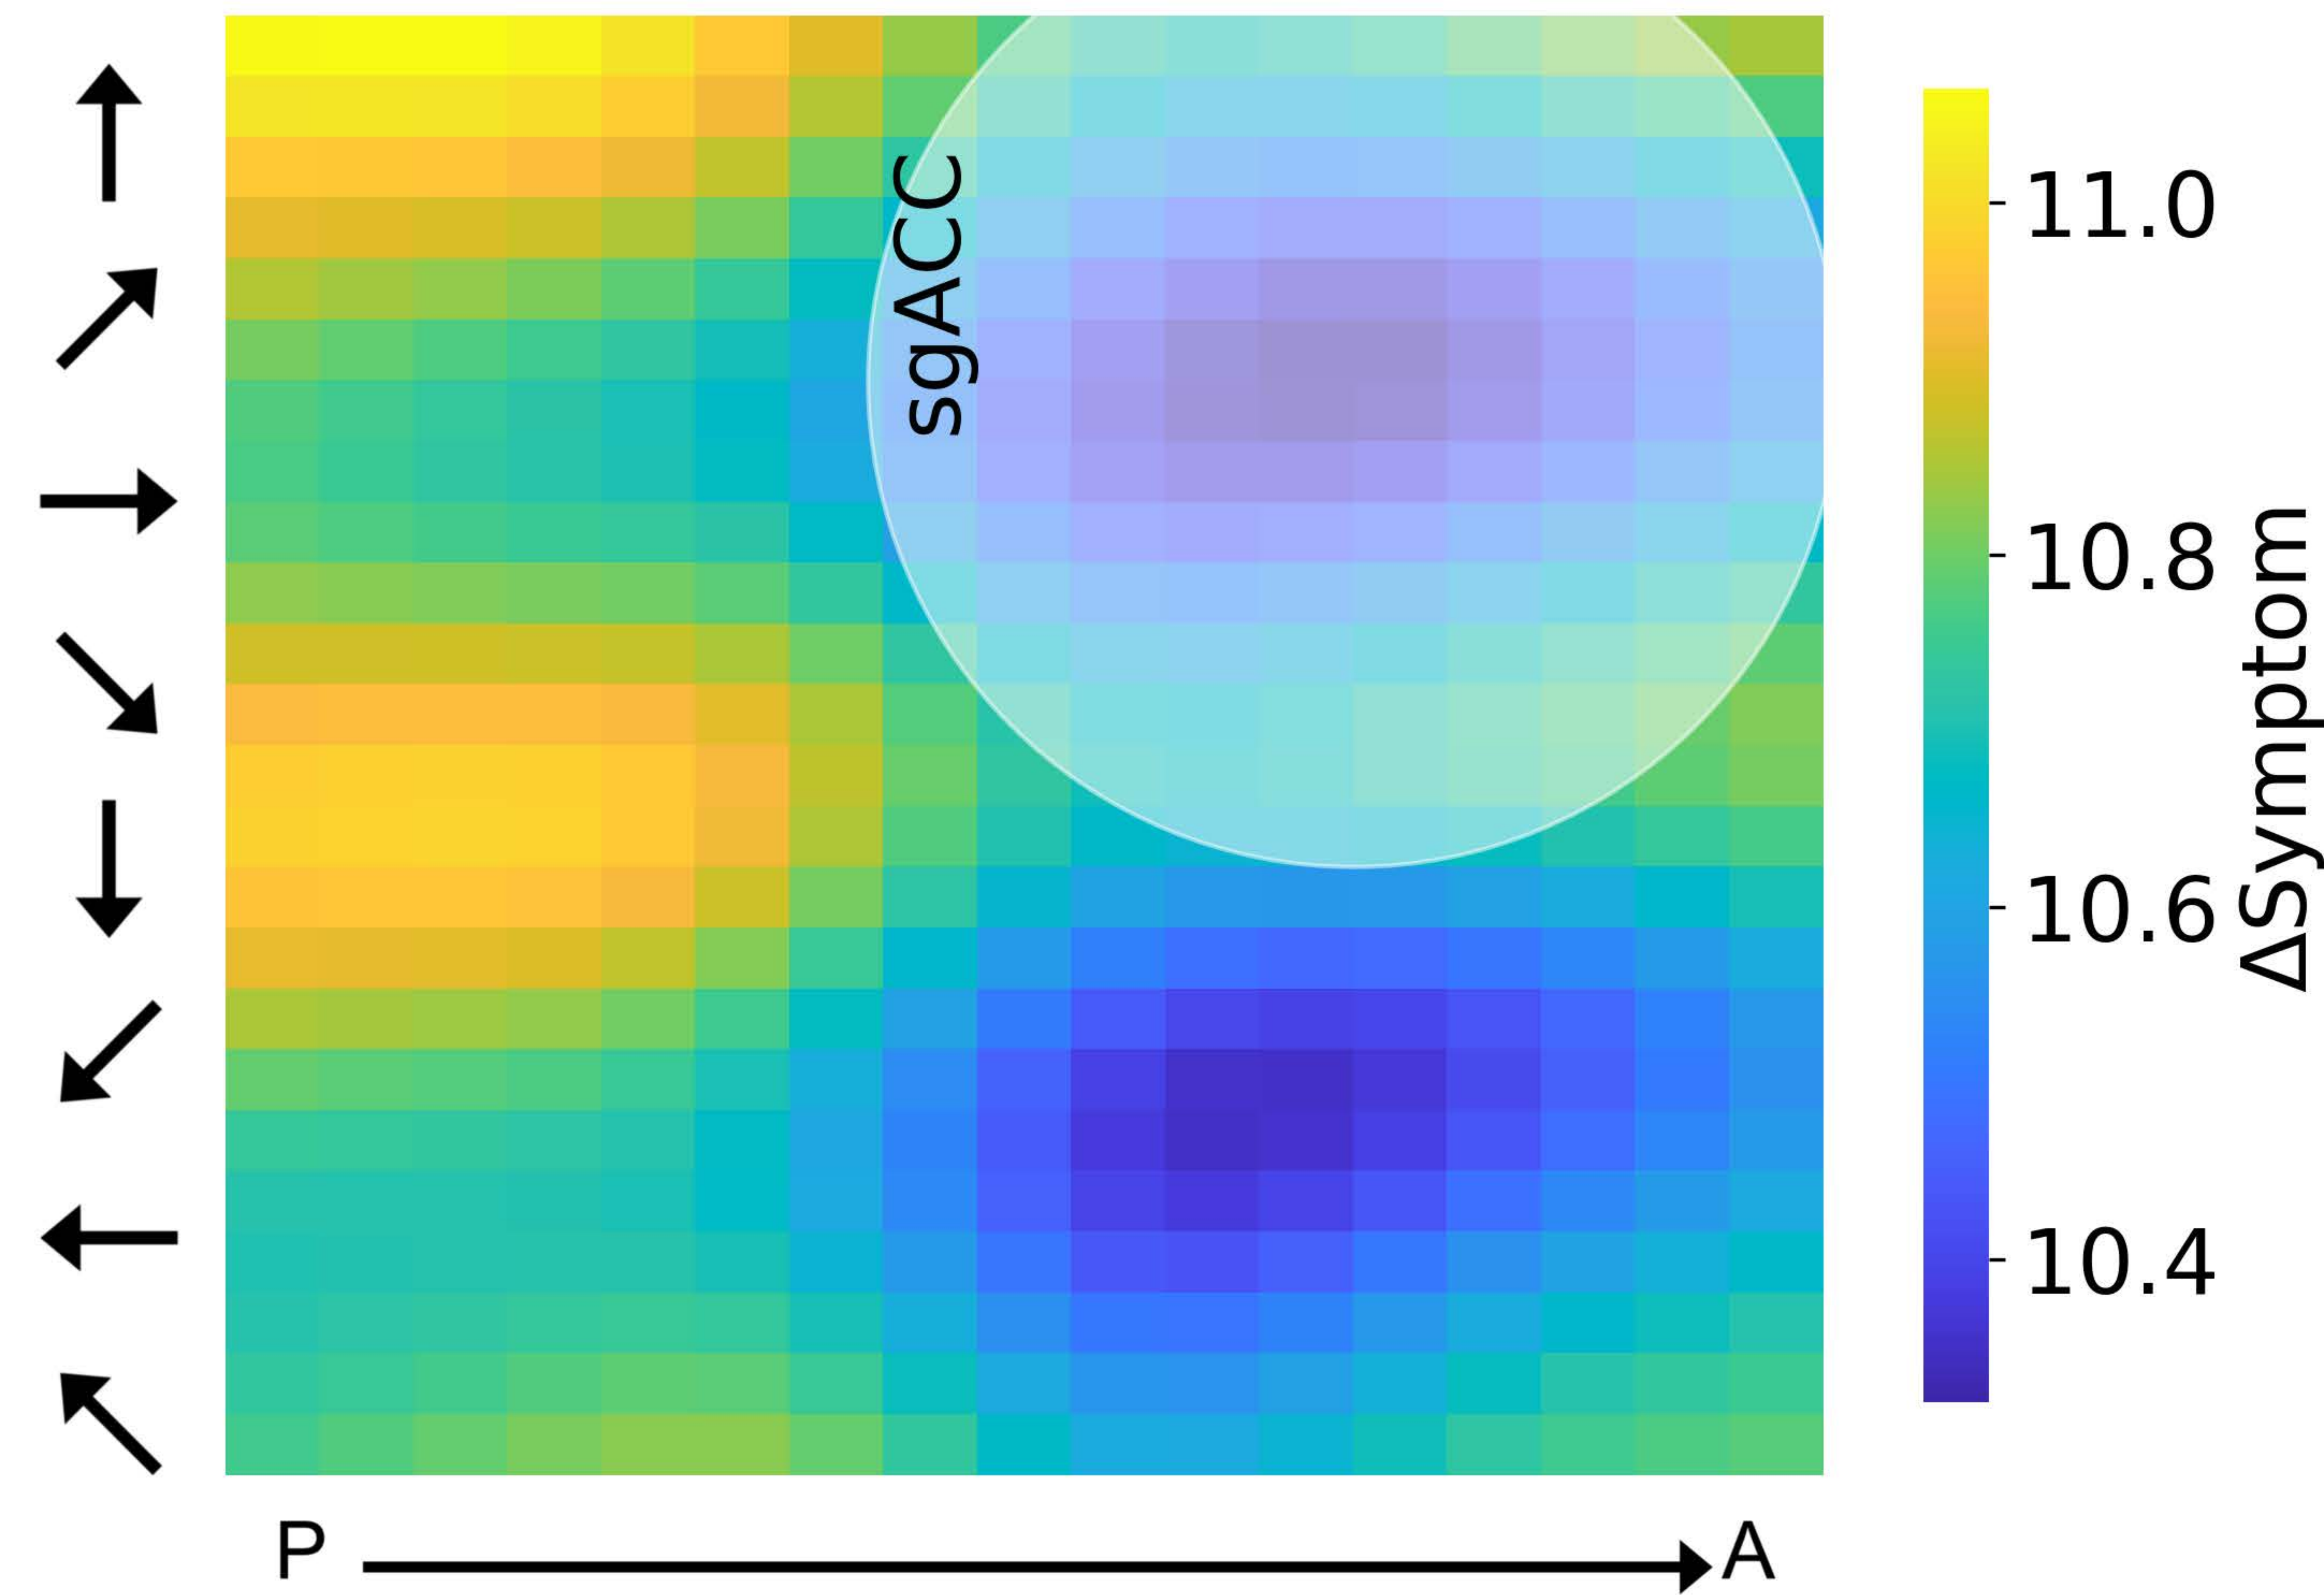



# NDARHA109LH7\_hamd\_right\_dlpfc

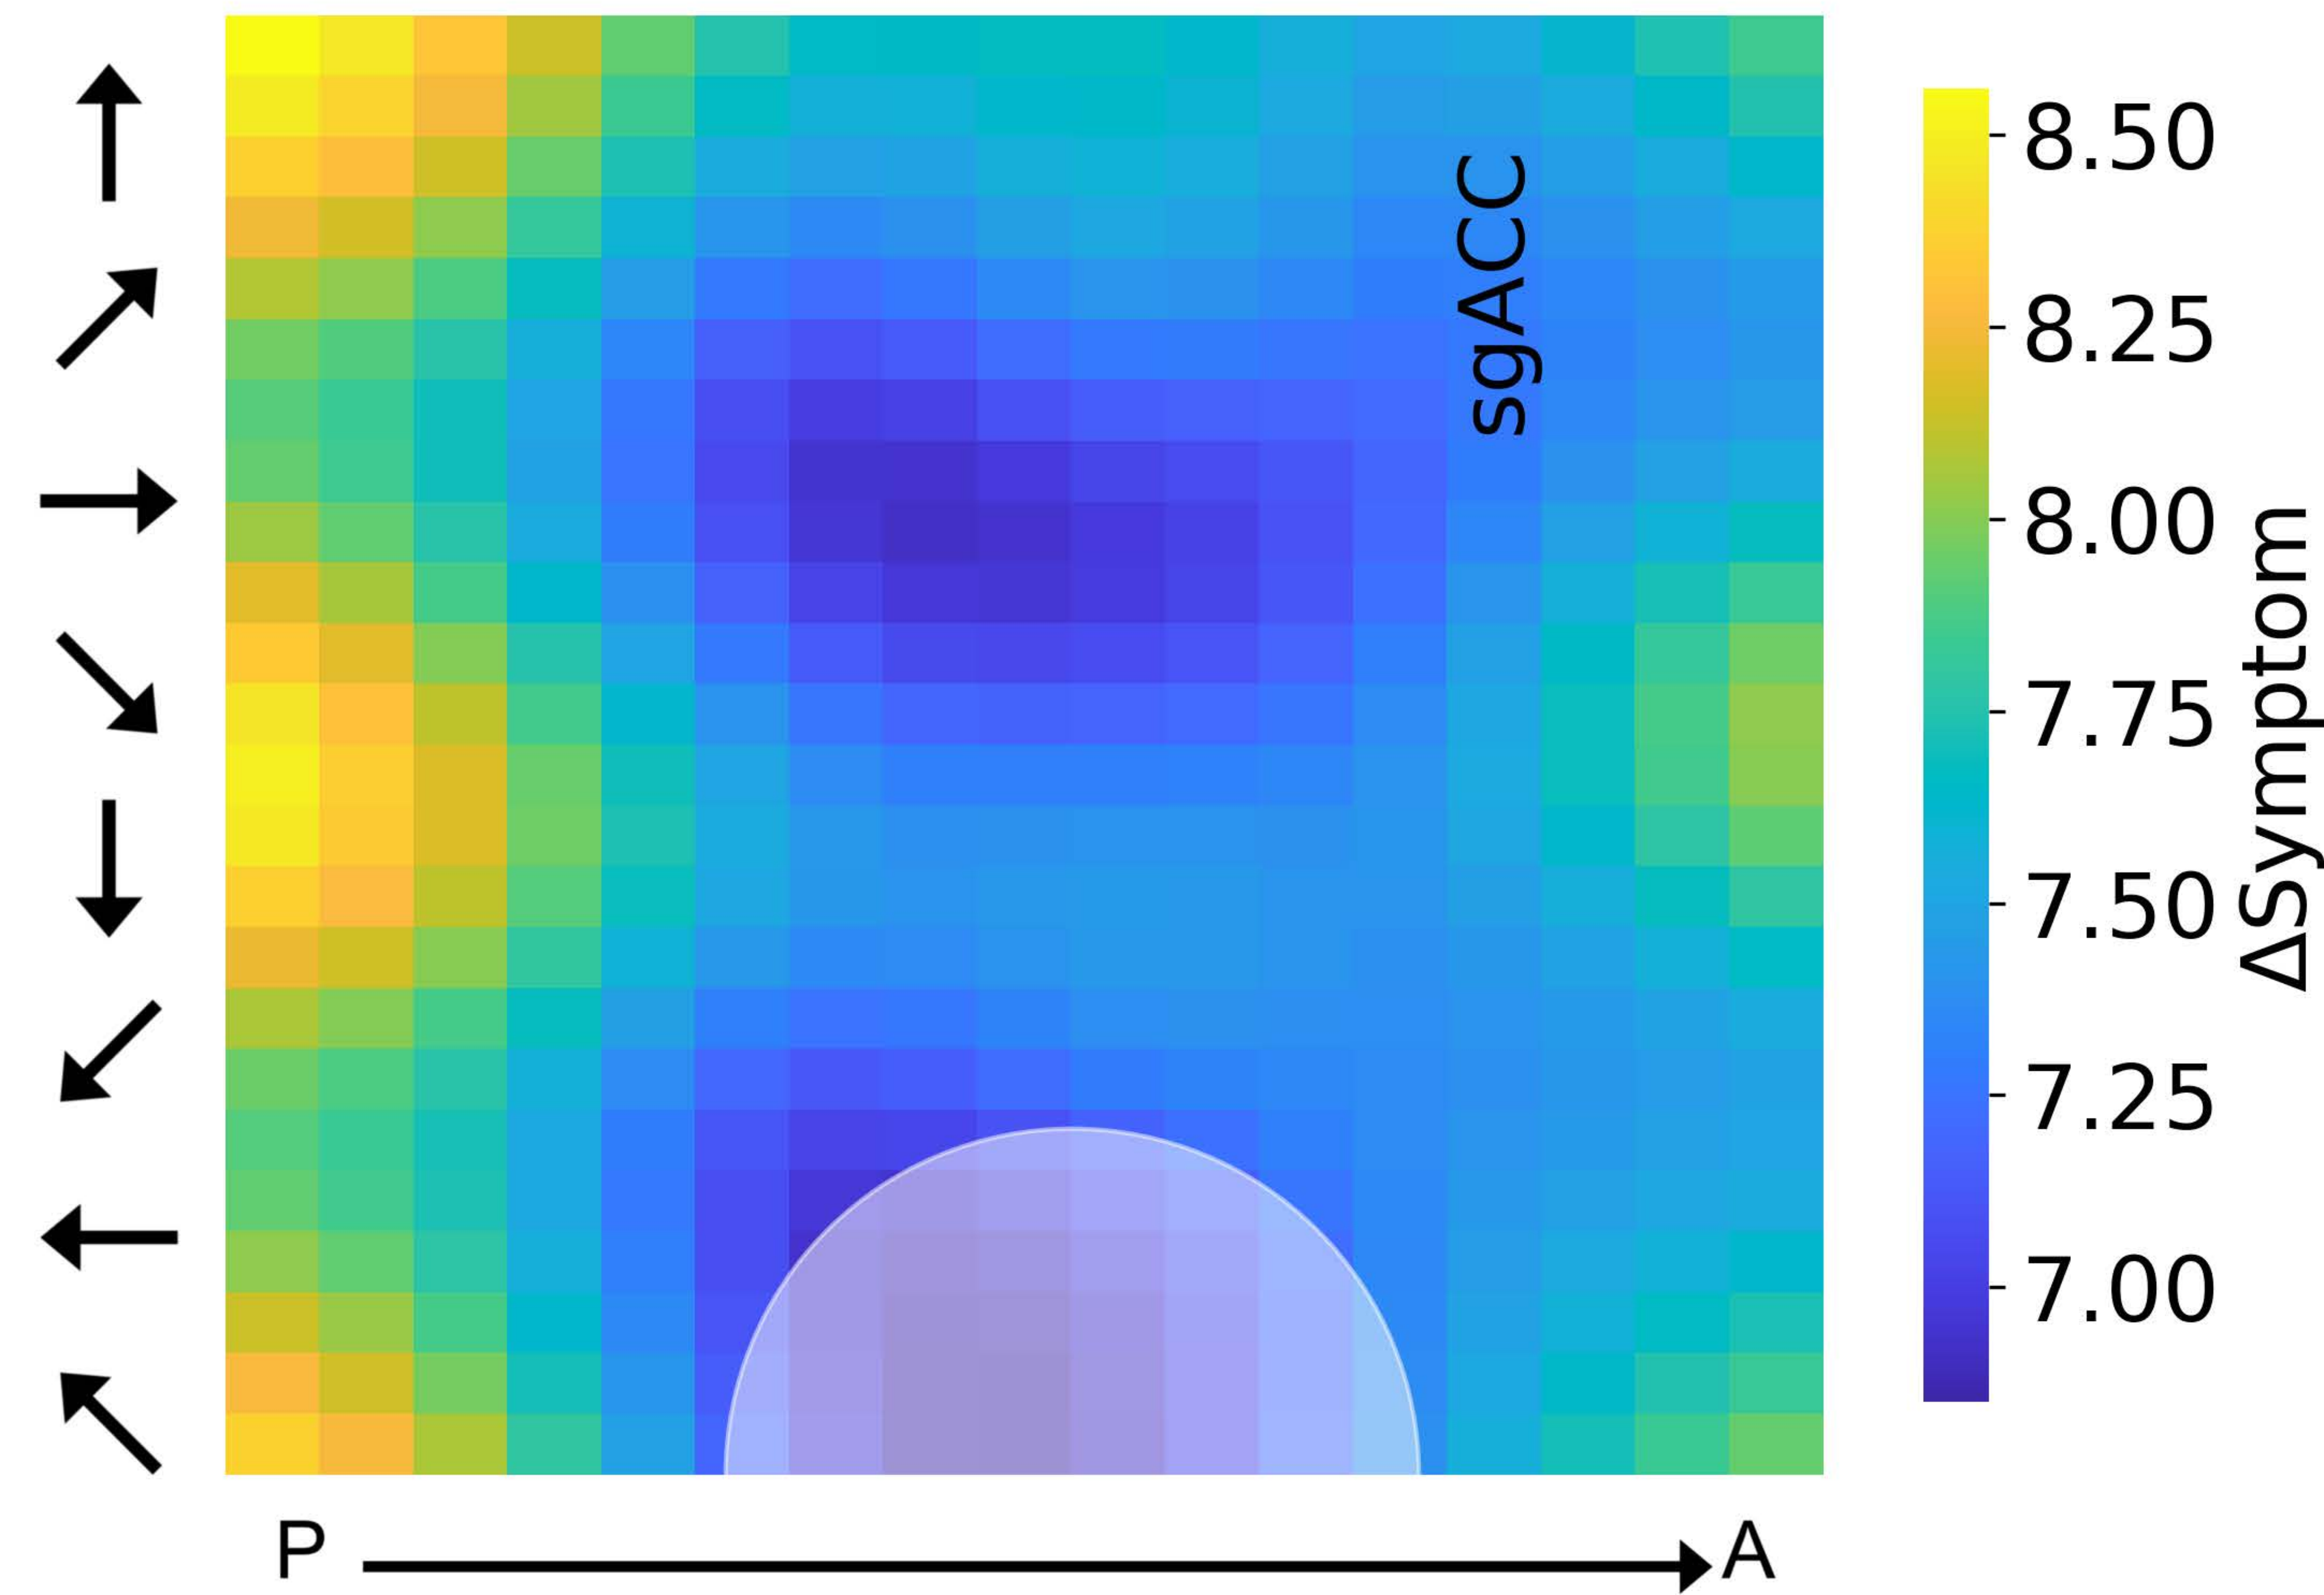



# INDARHR981AP1\_hamd\_right\_dlpfc

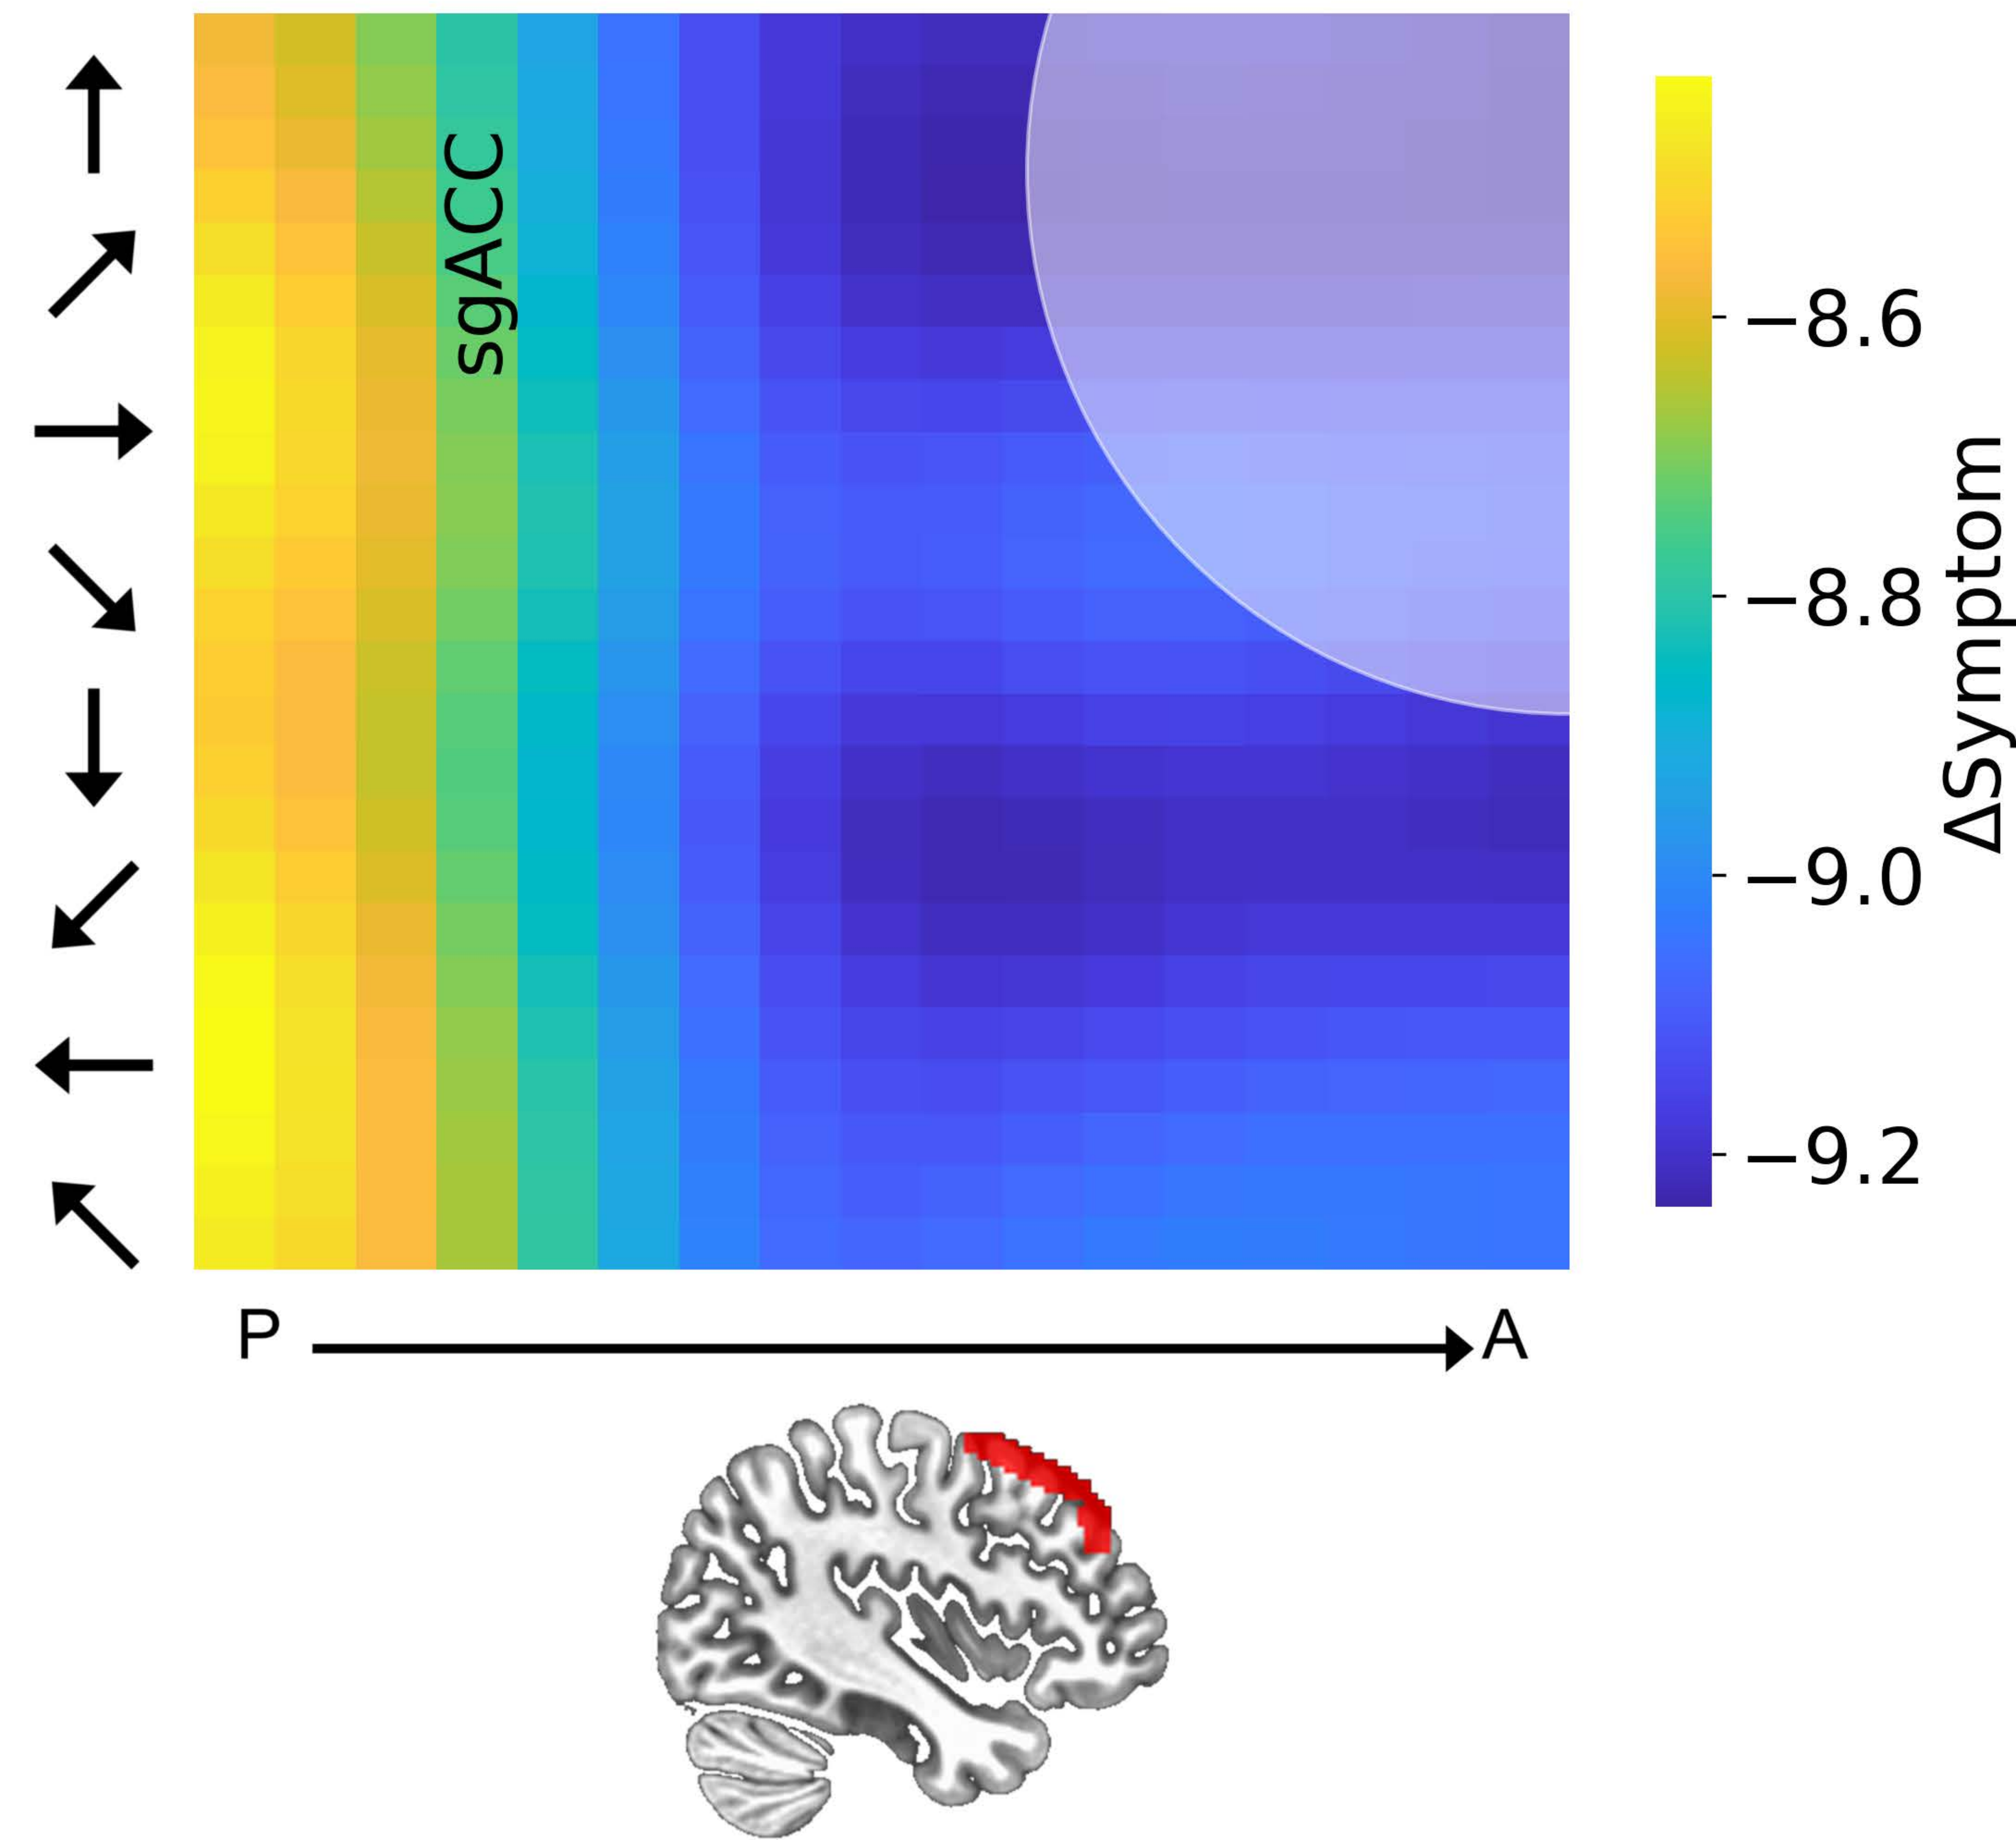



# NDARHX487CT9\_hamd\_right\_dlpfc

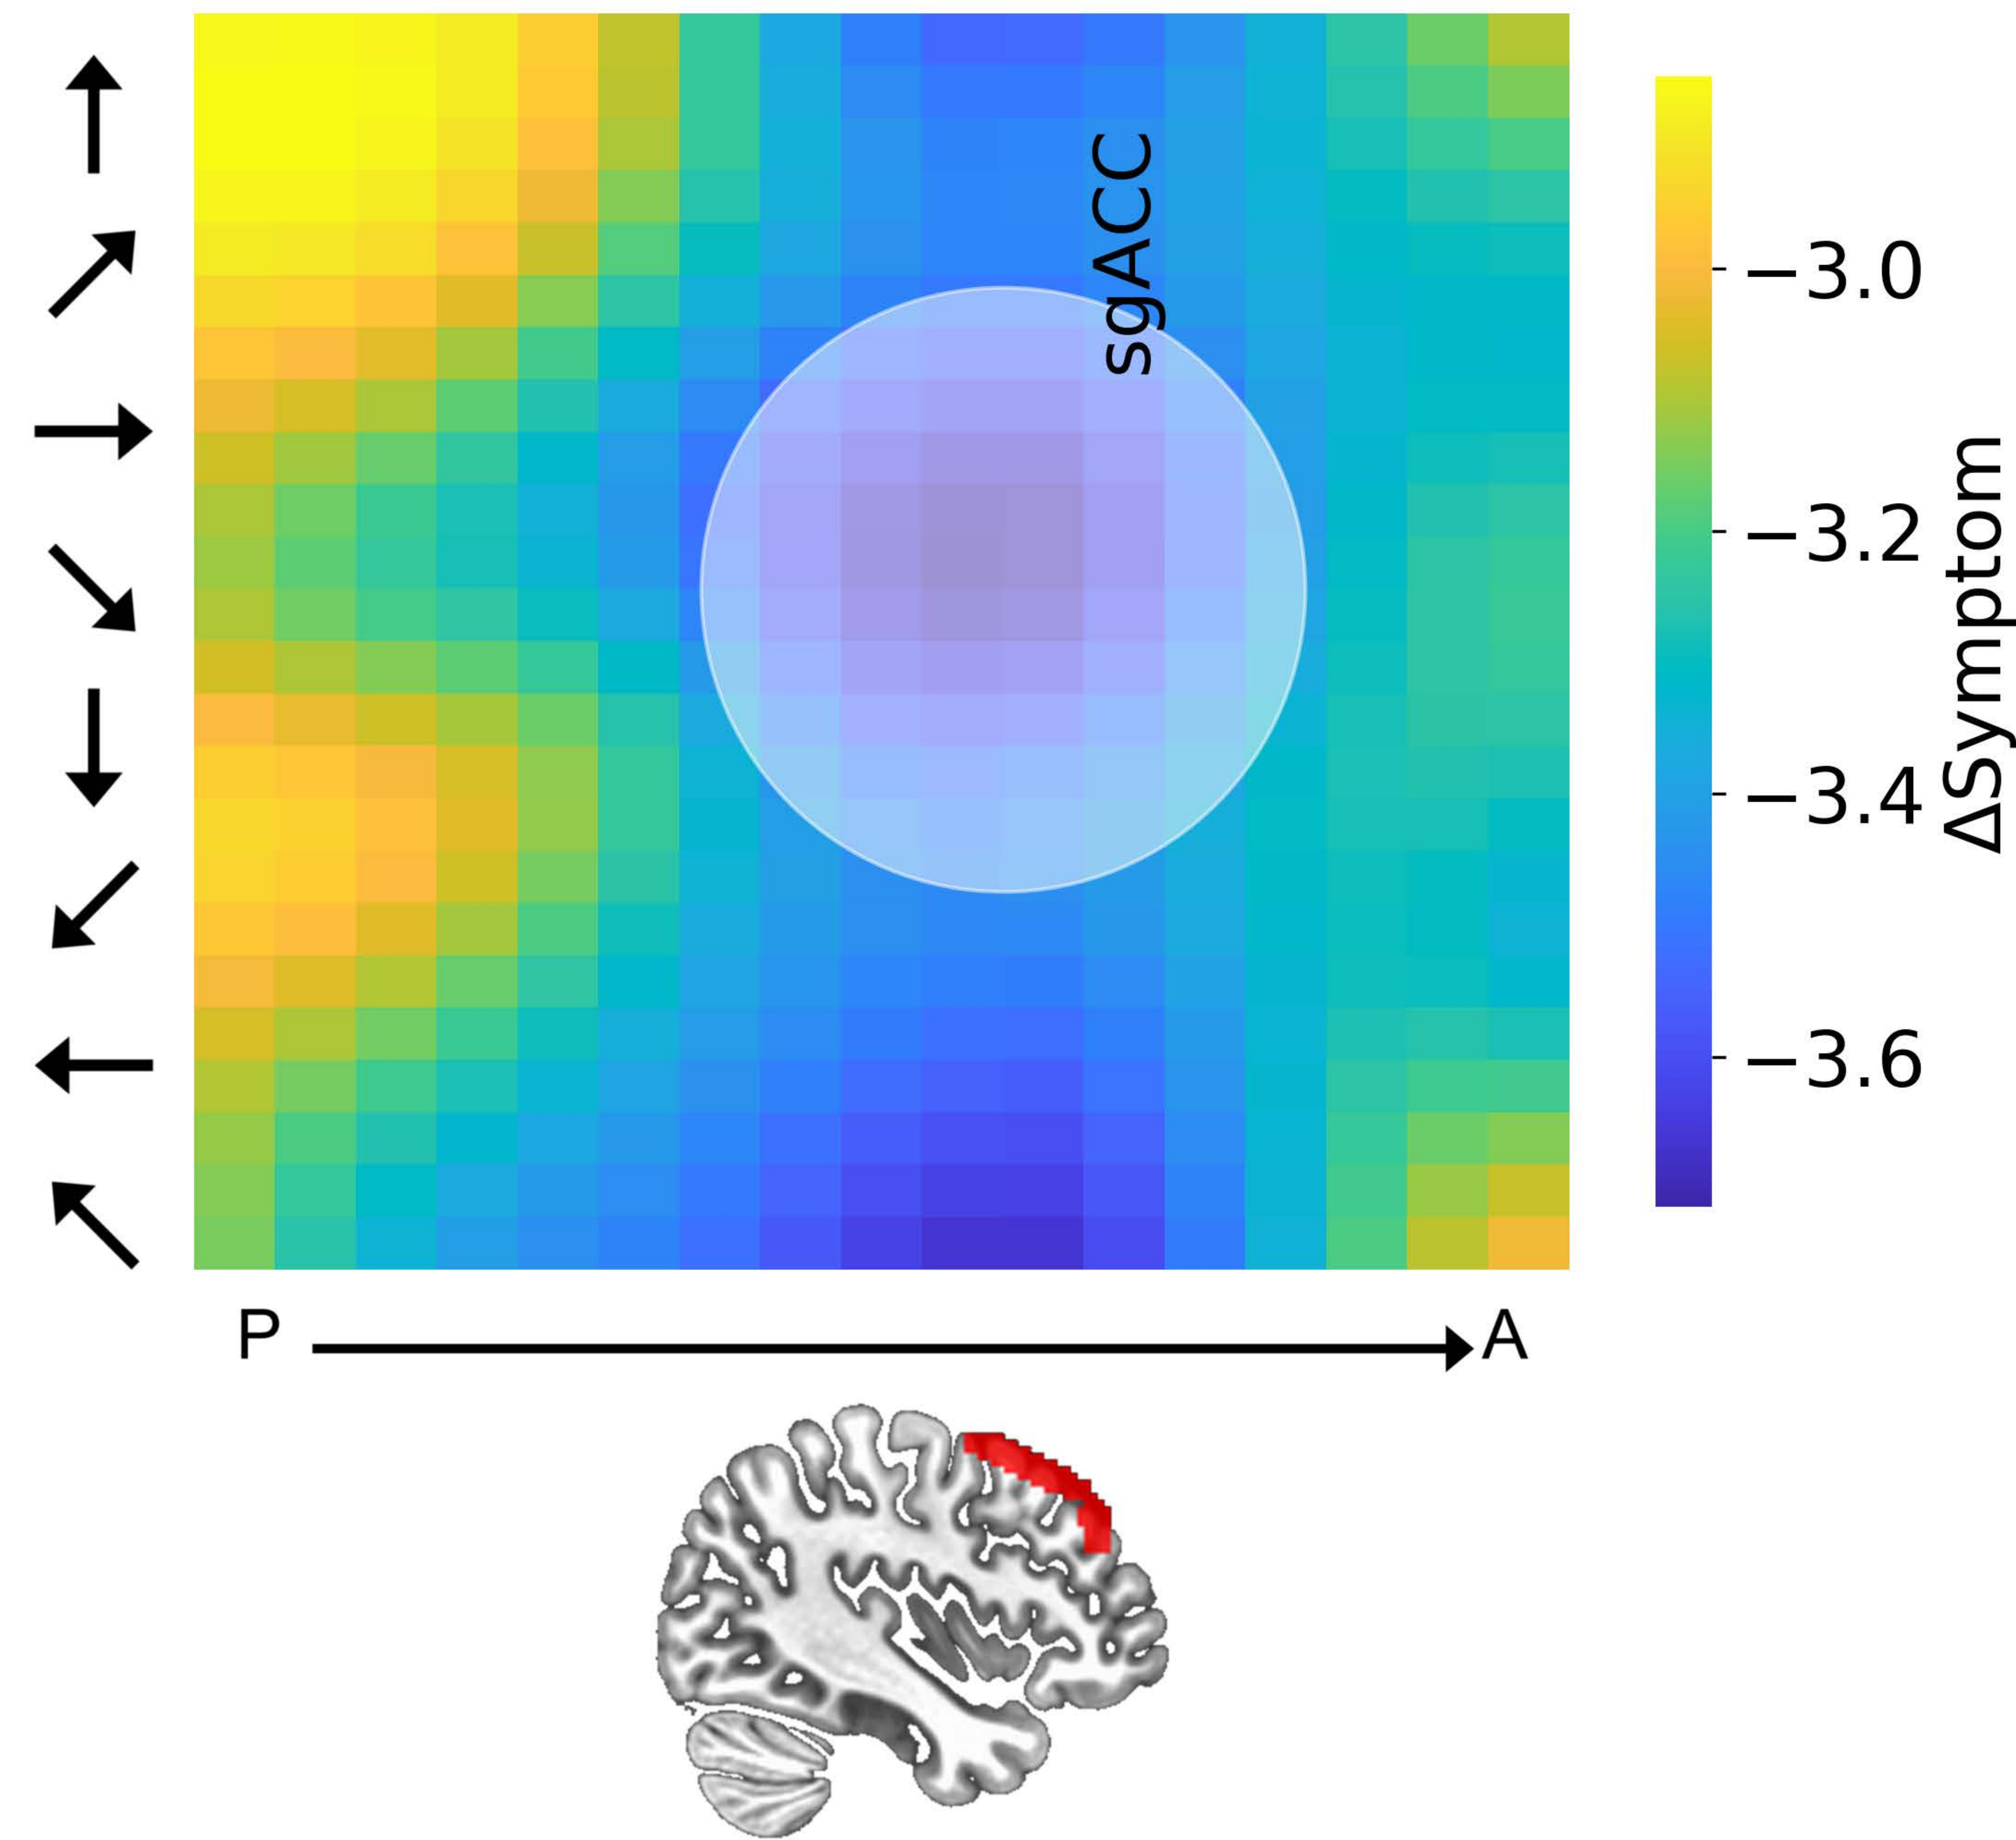



# INDARHZ301NUW\_hamd\_right\_dlpfc

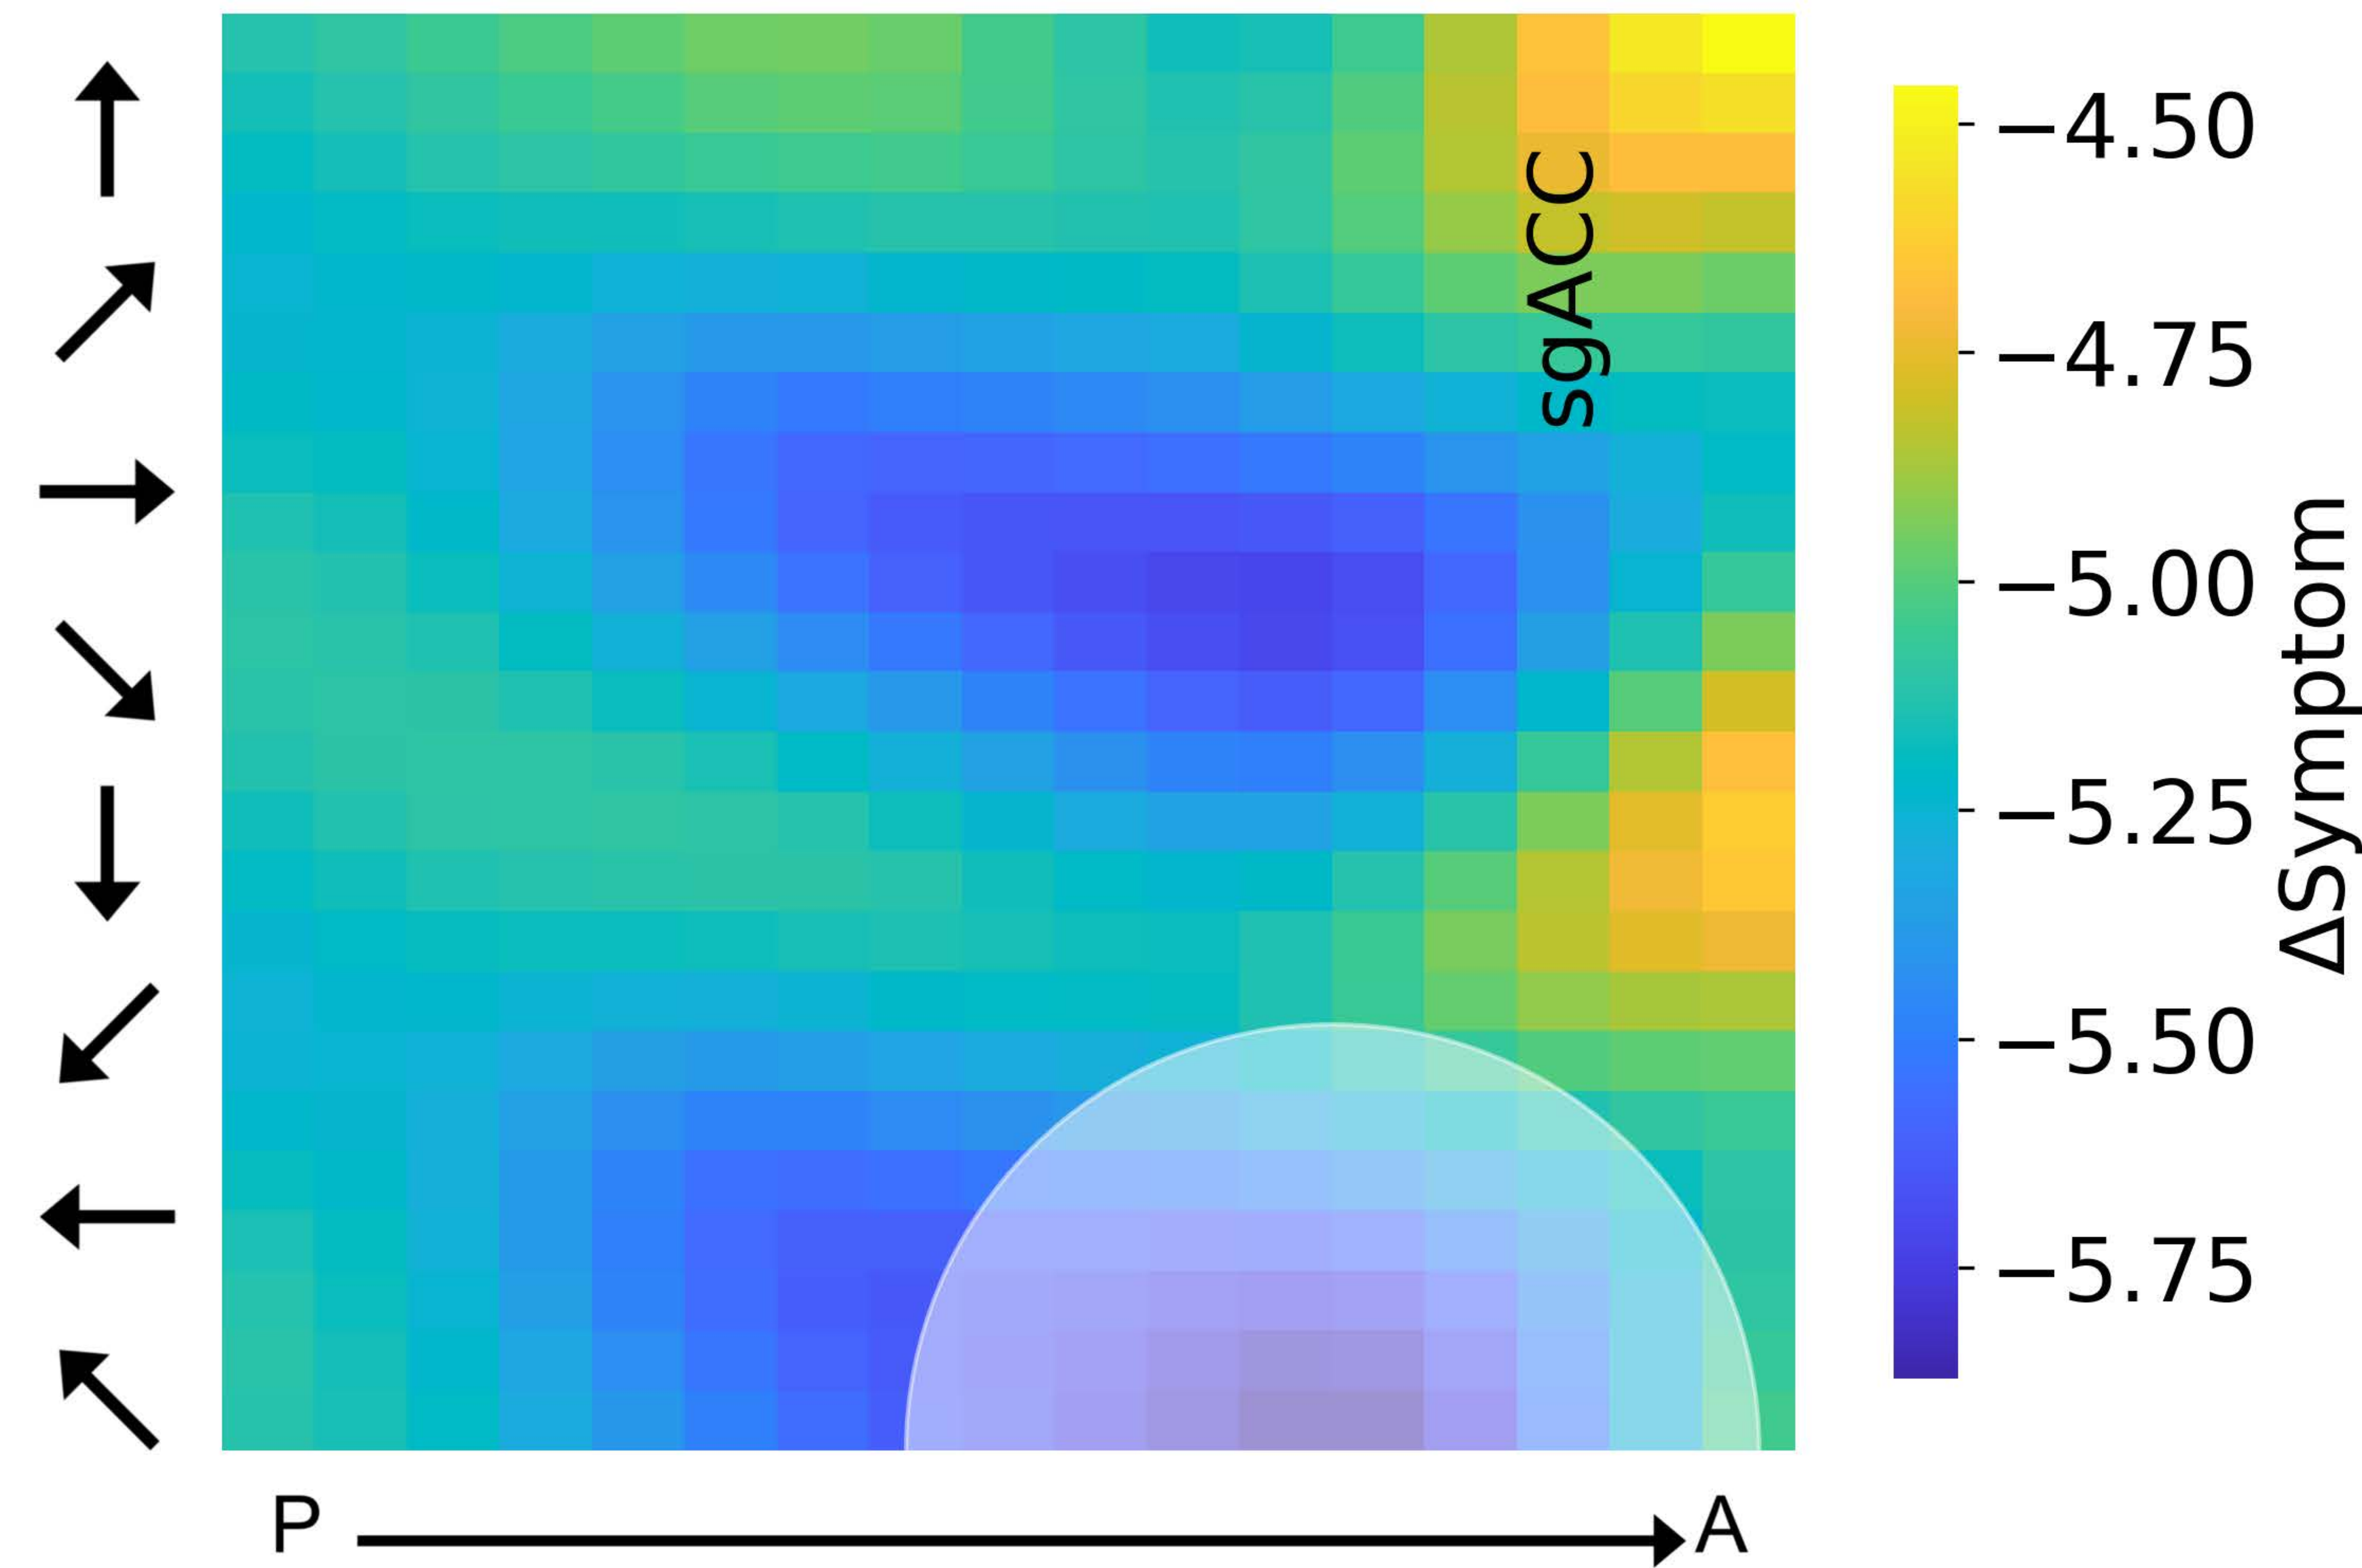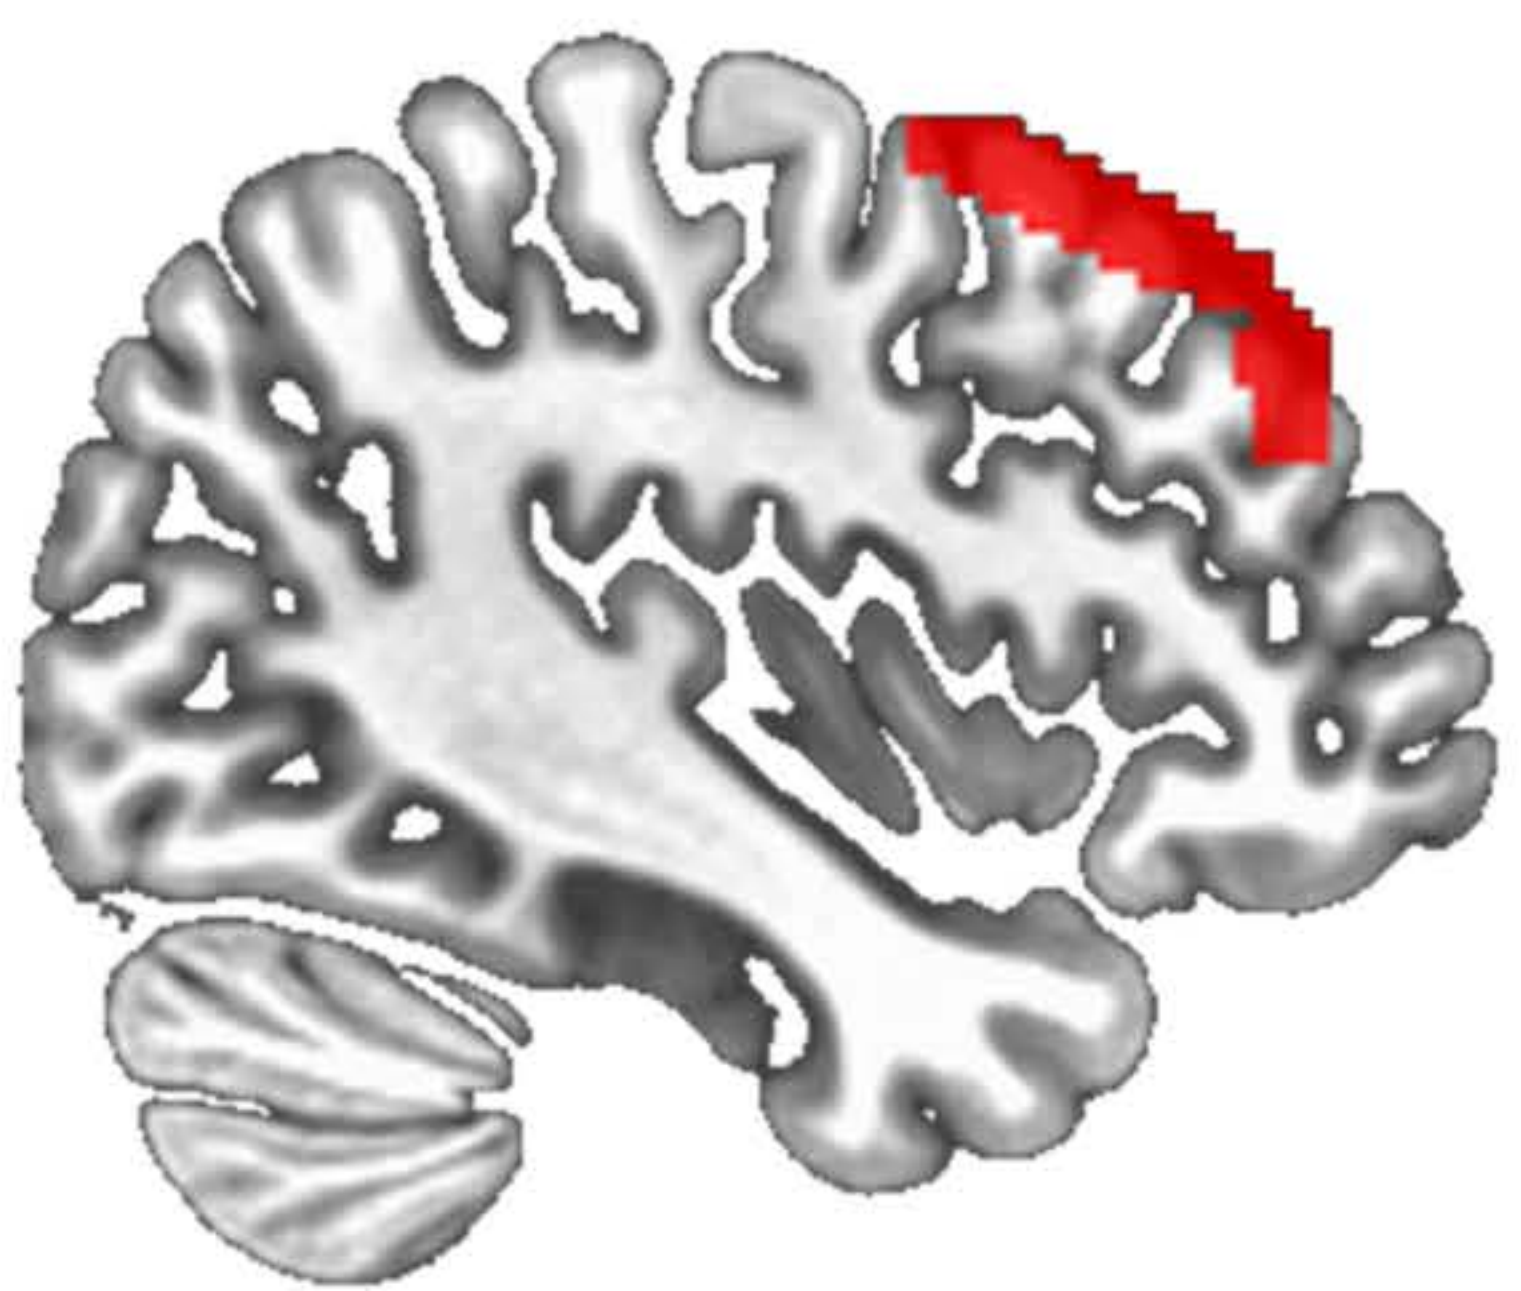



# INDARHZ662EPK\_hamd\_right\_dlpfc

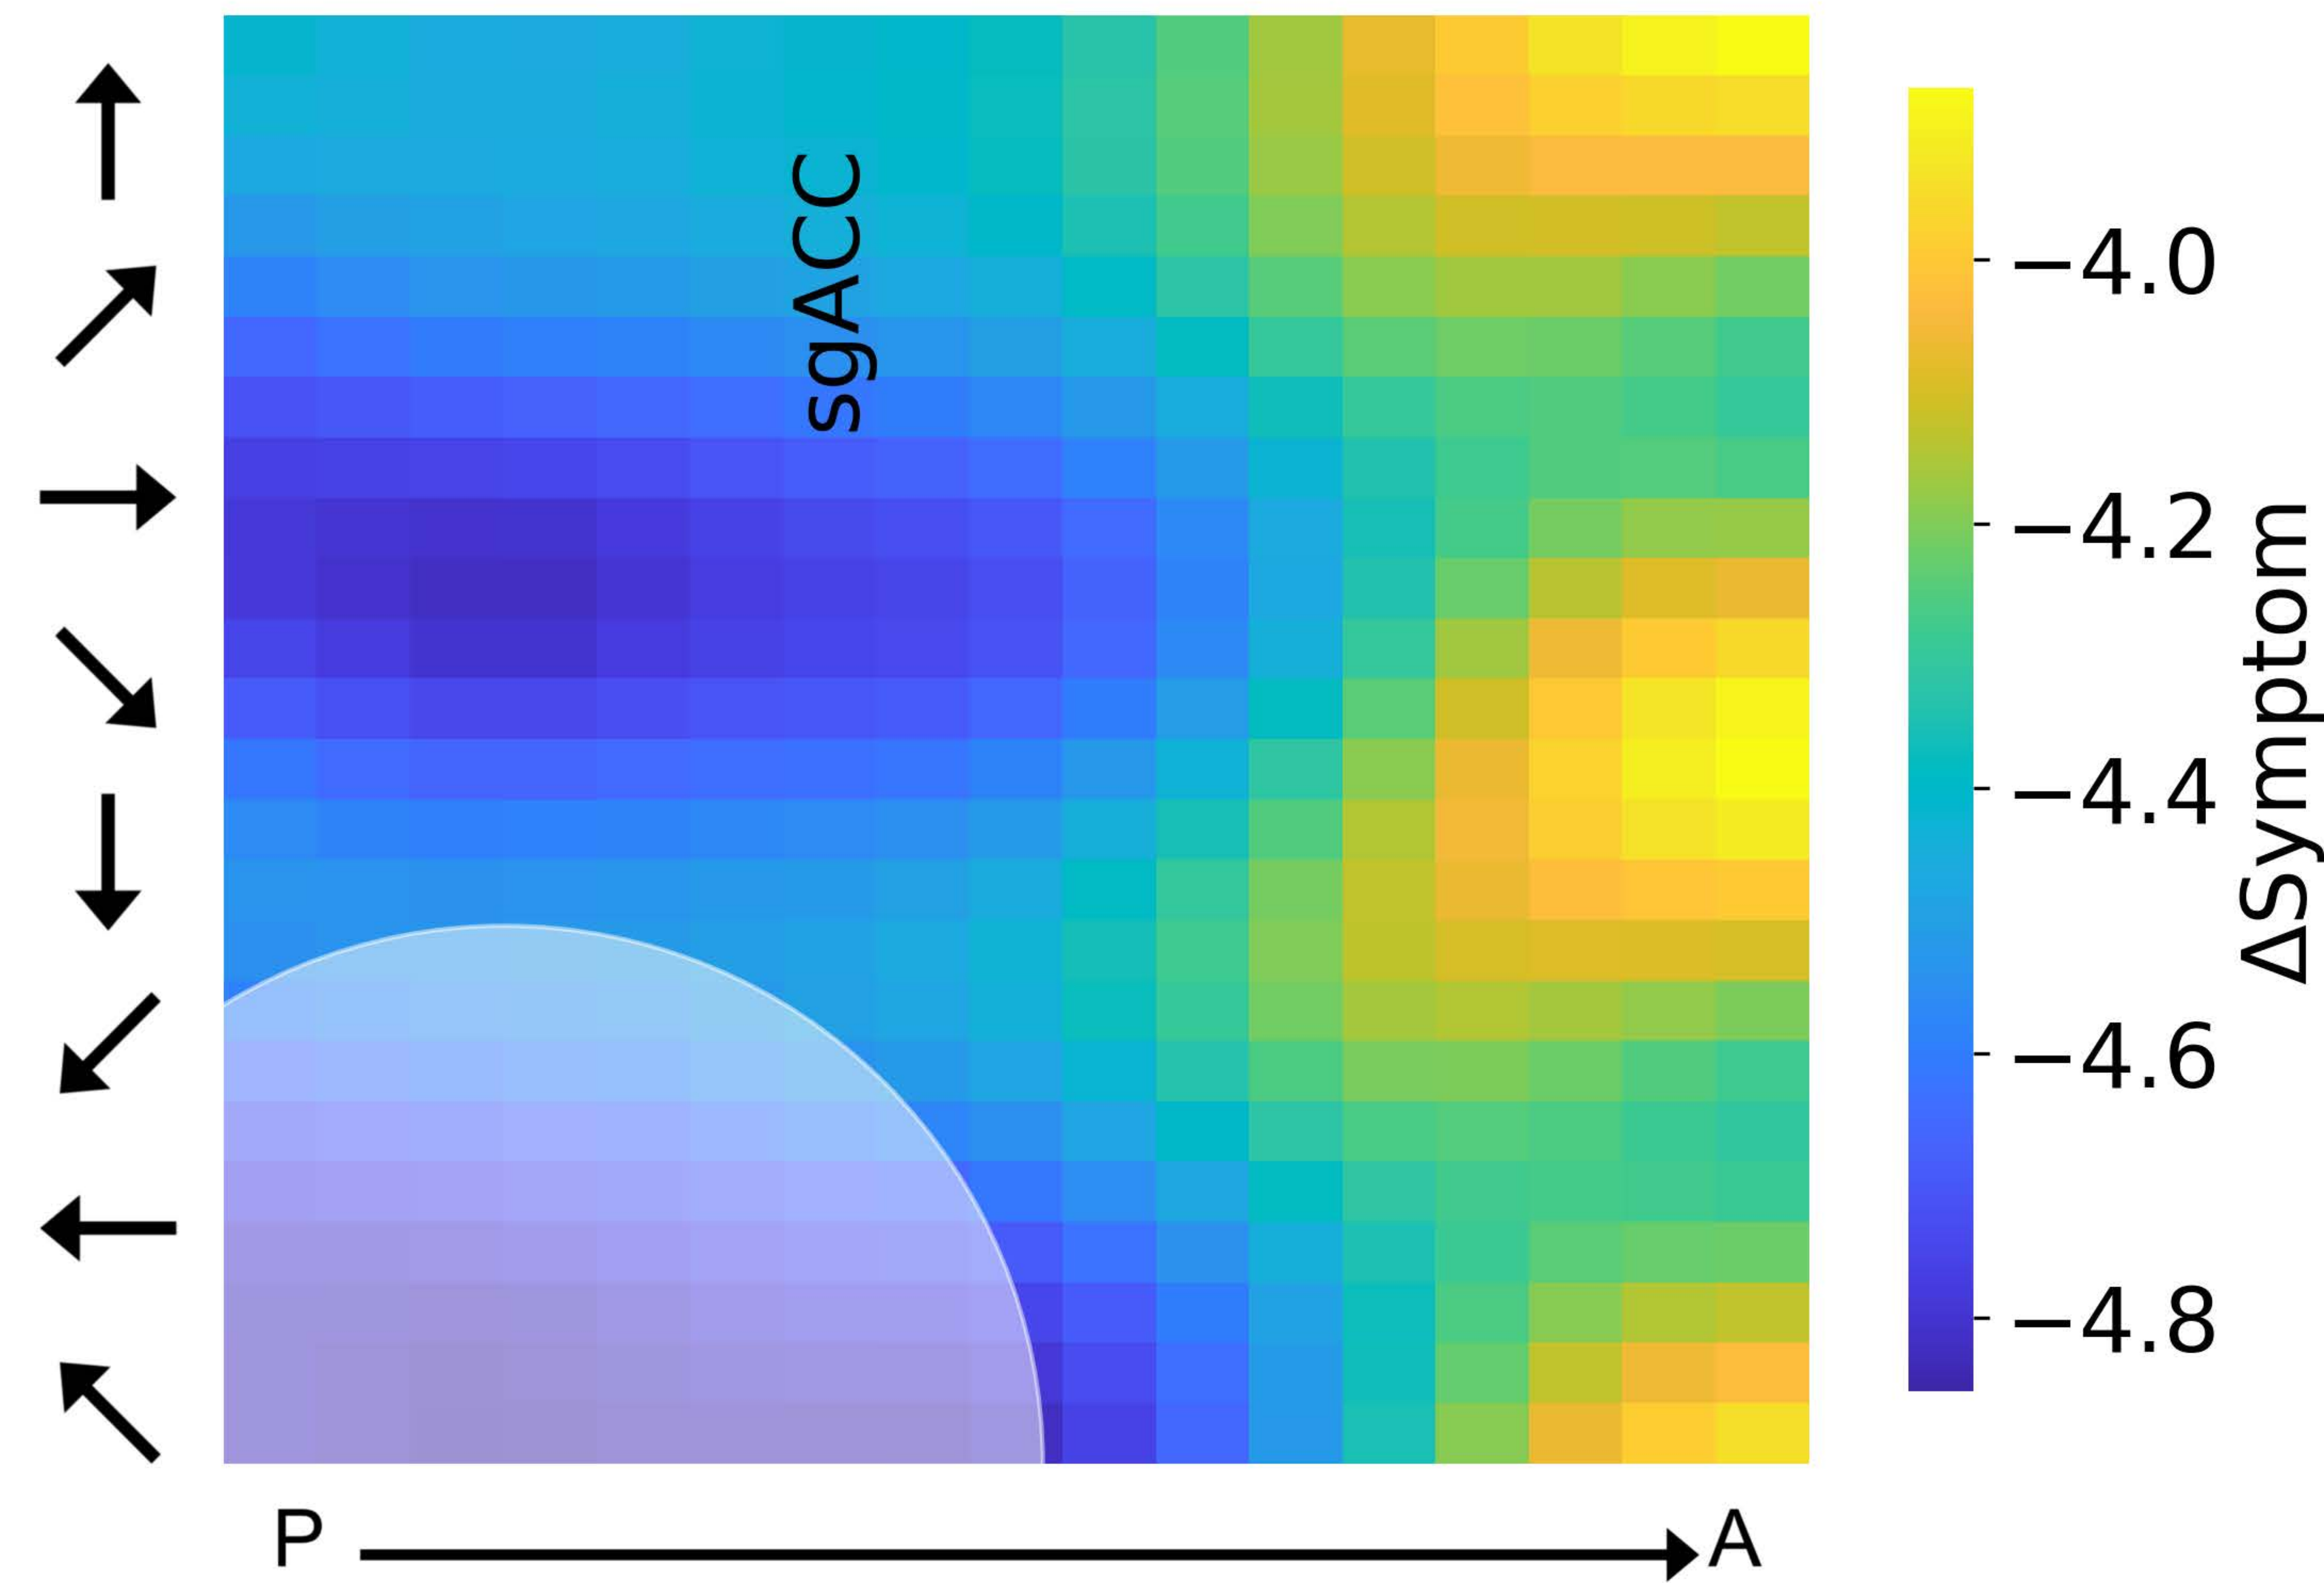



# INDARJD271PMF\_hamd\_right\_dlpfc

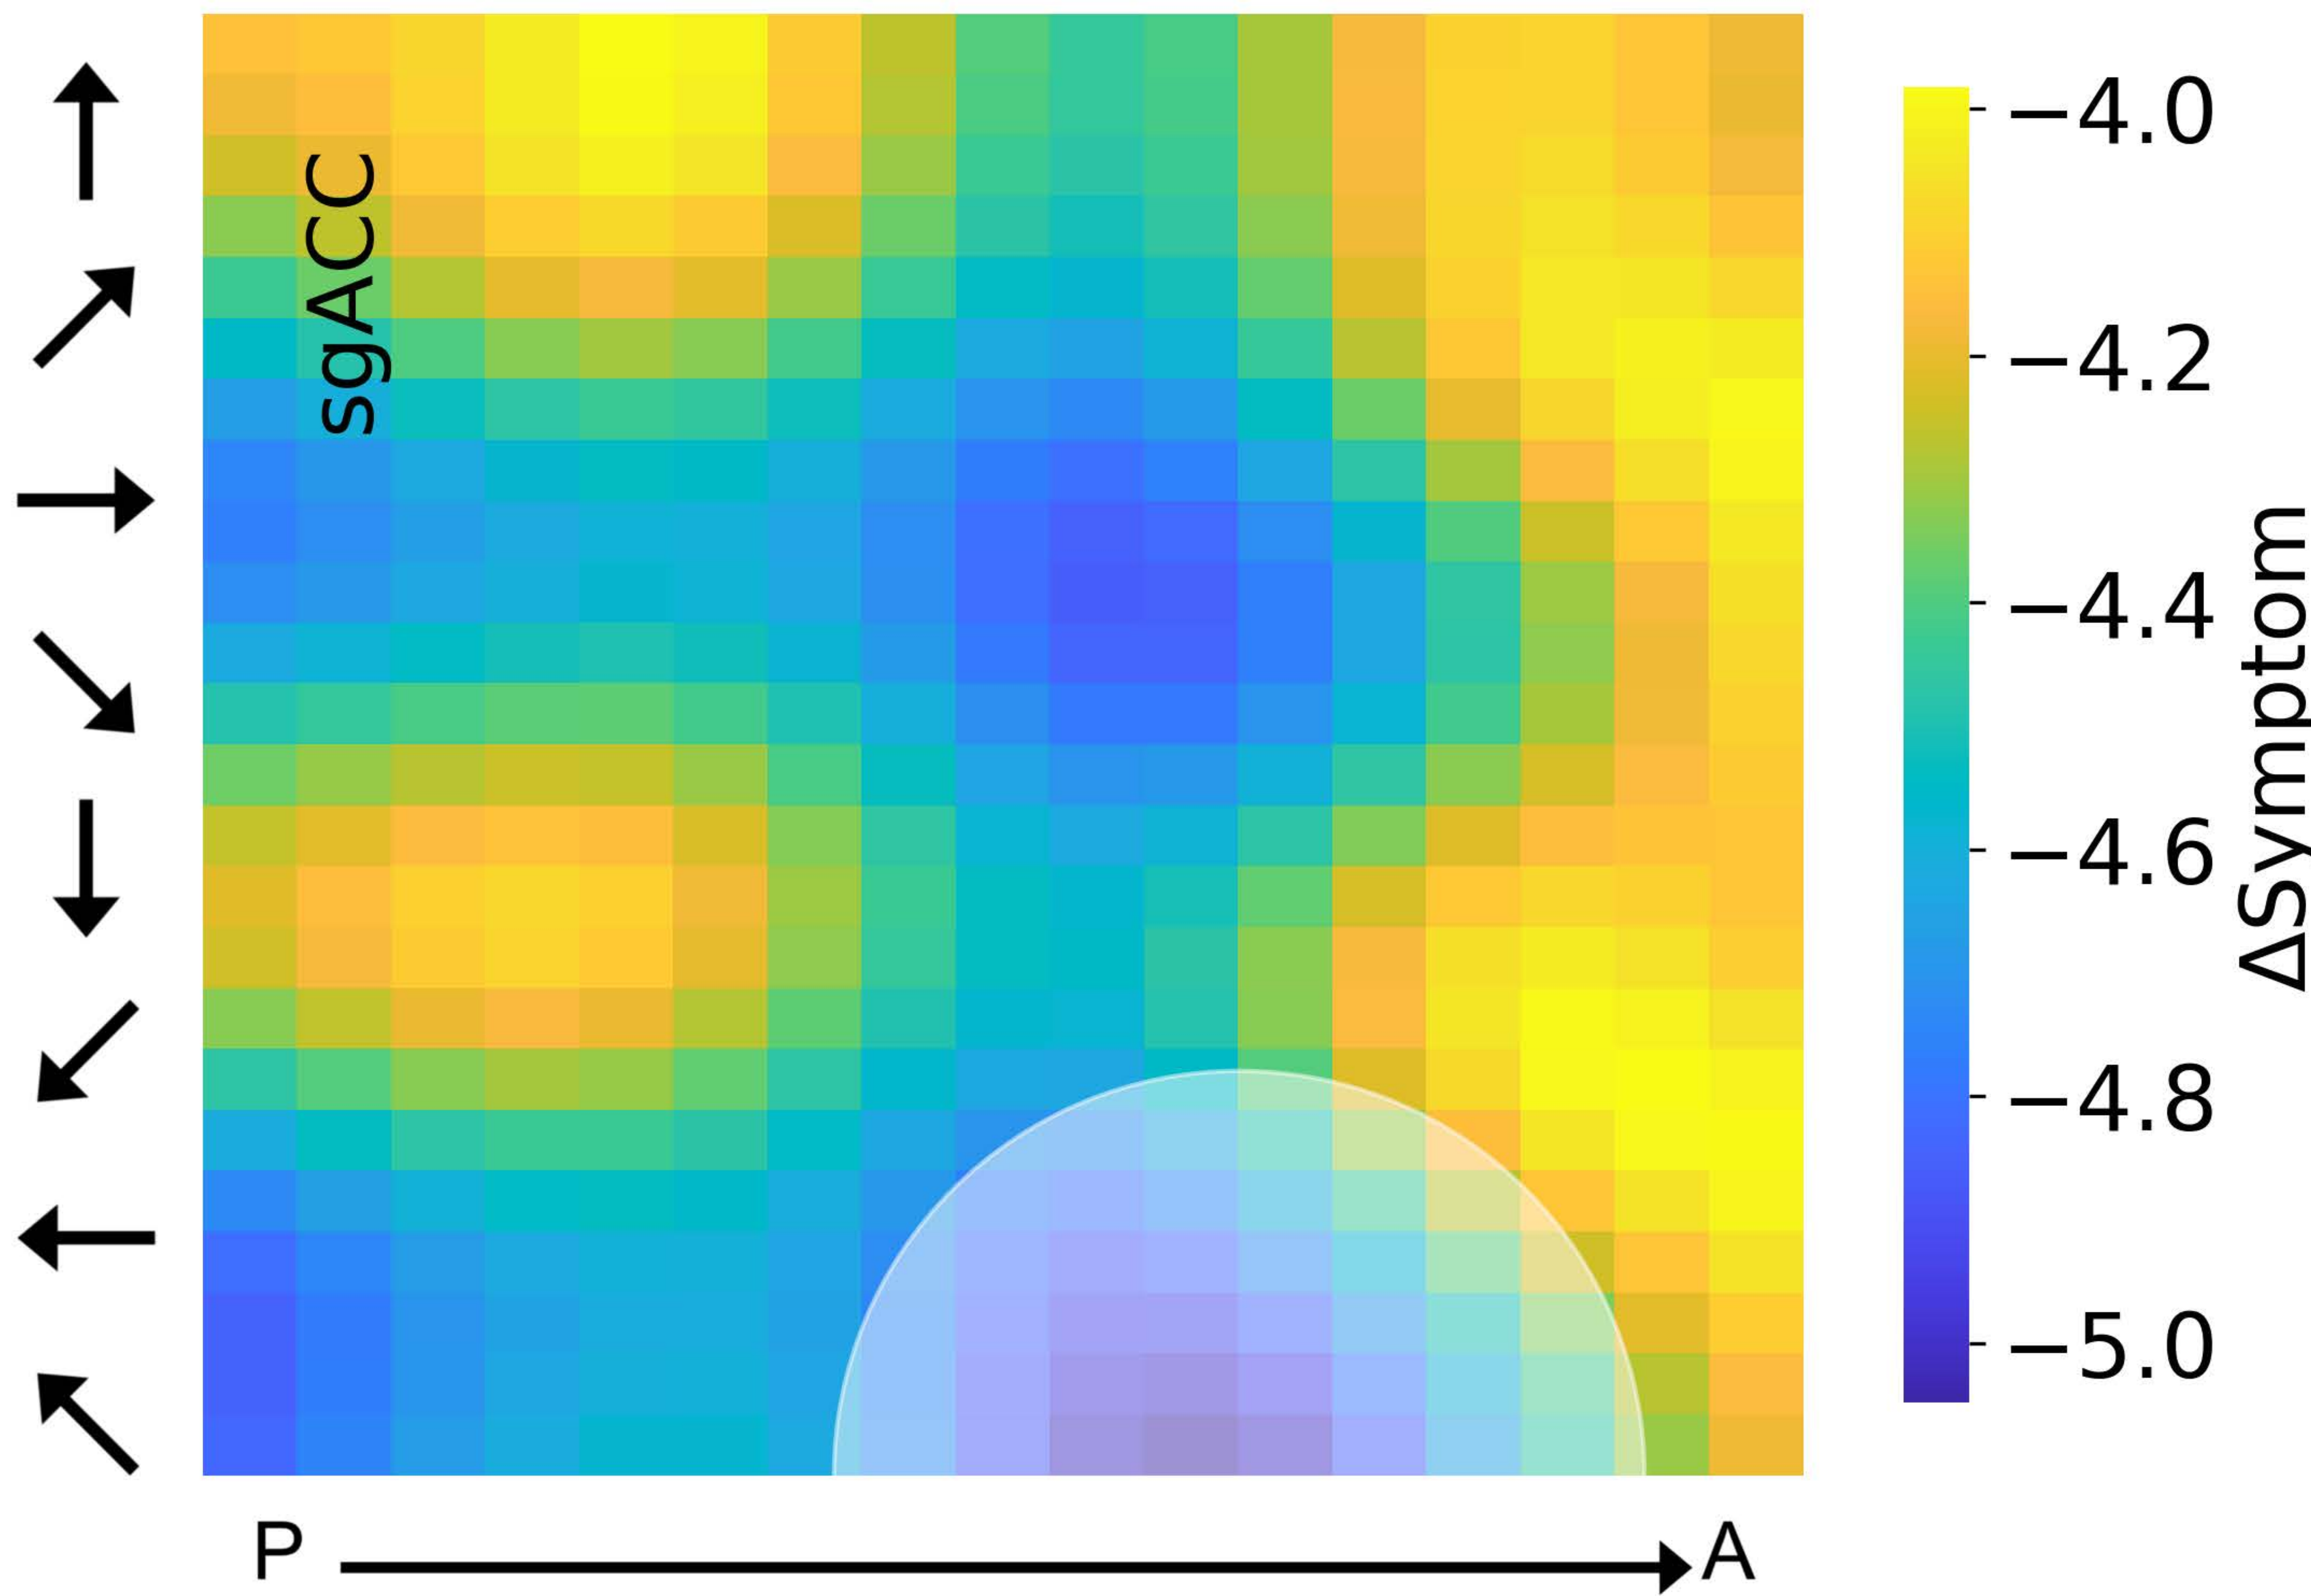



# INDARJD548GTC\_hamd\_right\_dlpfc

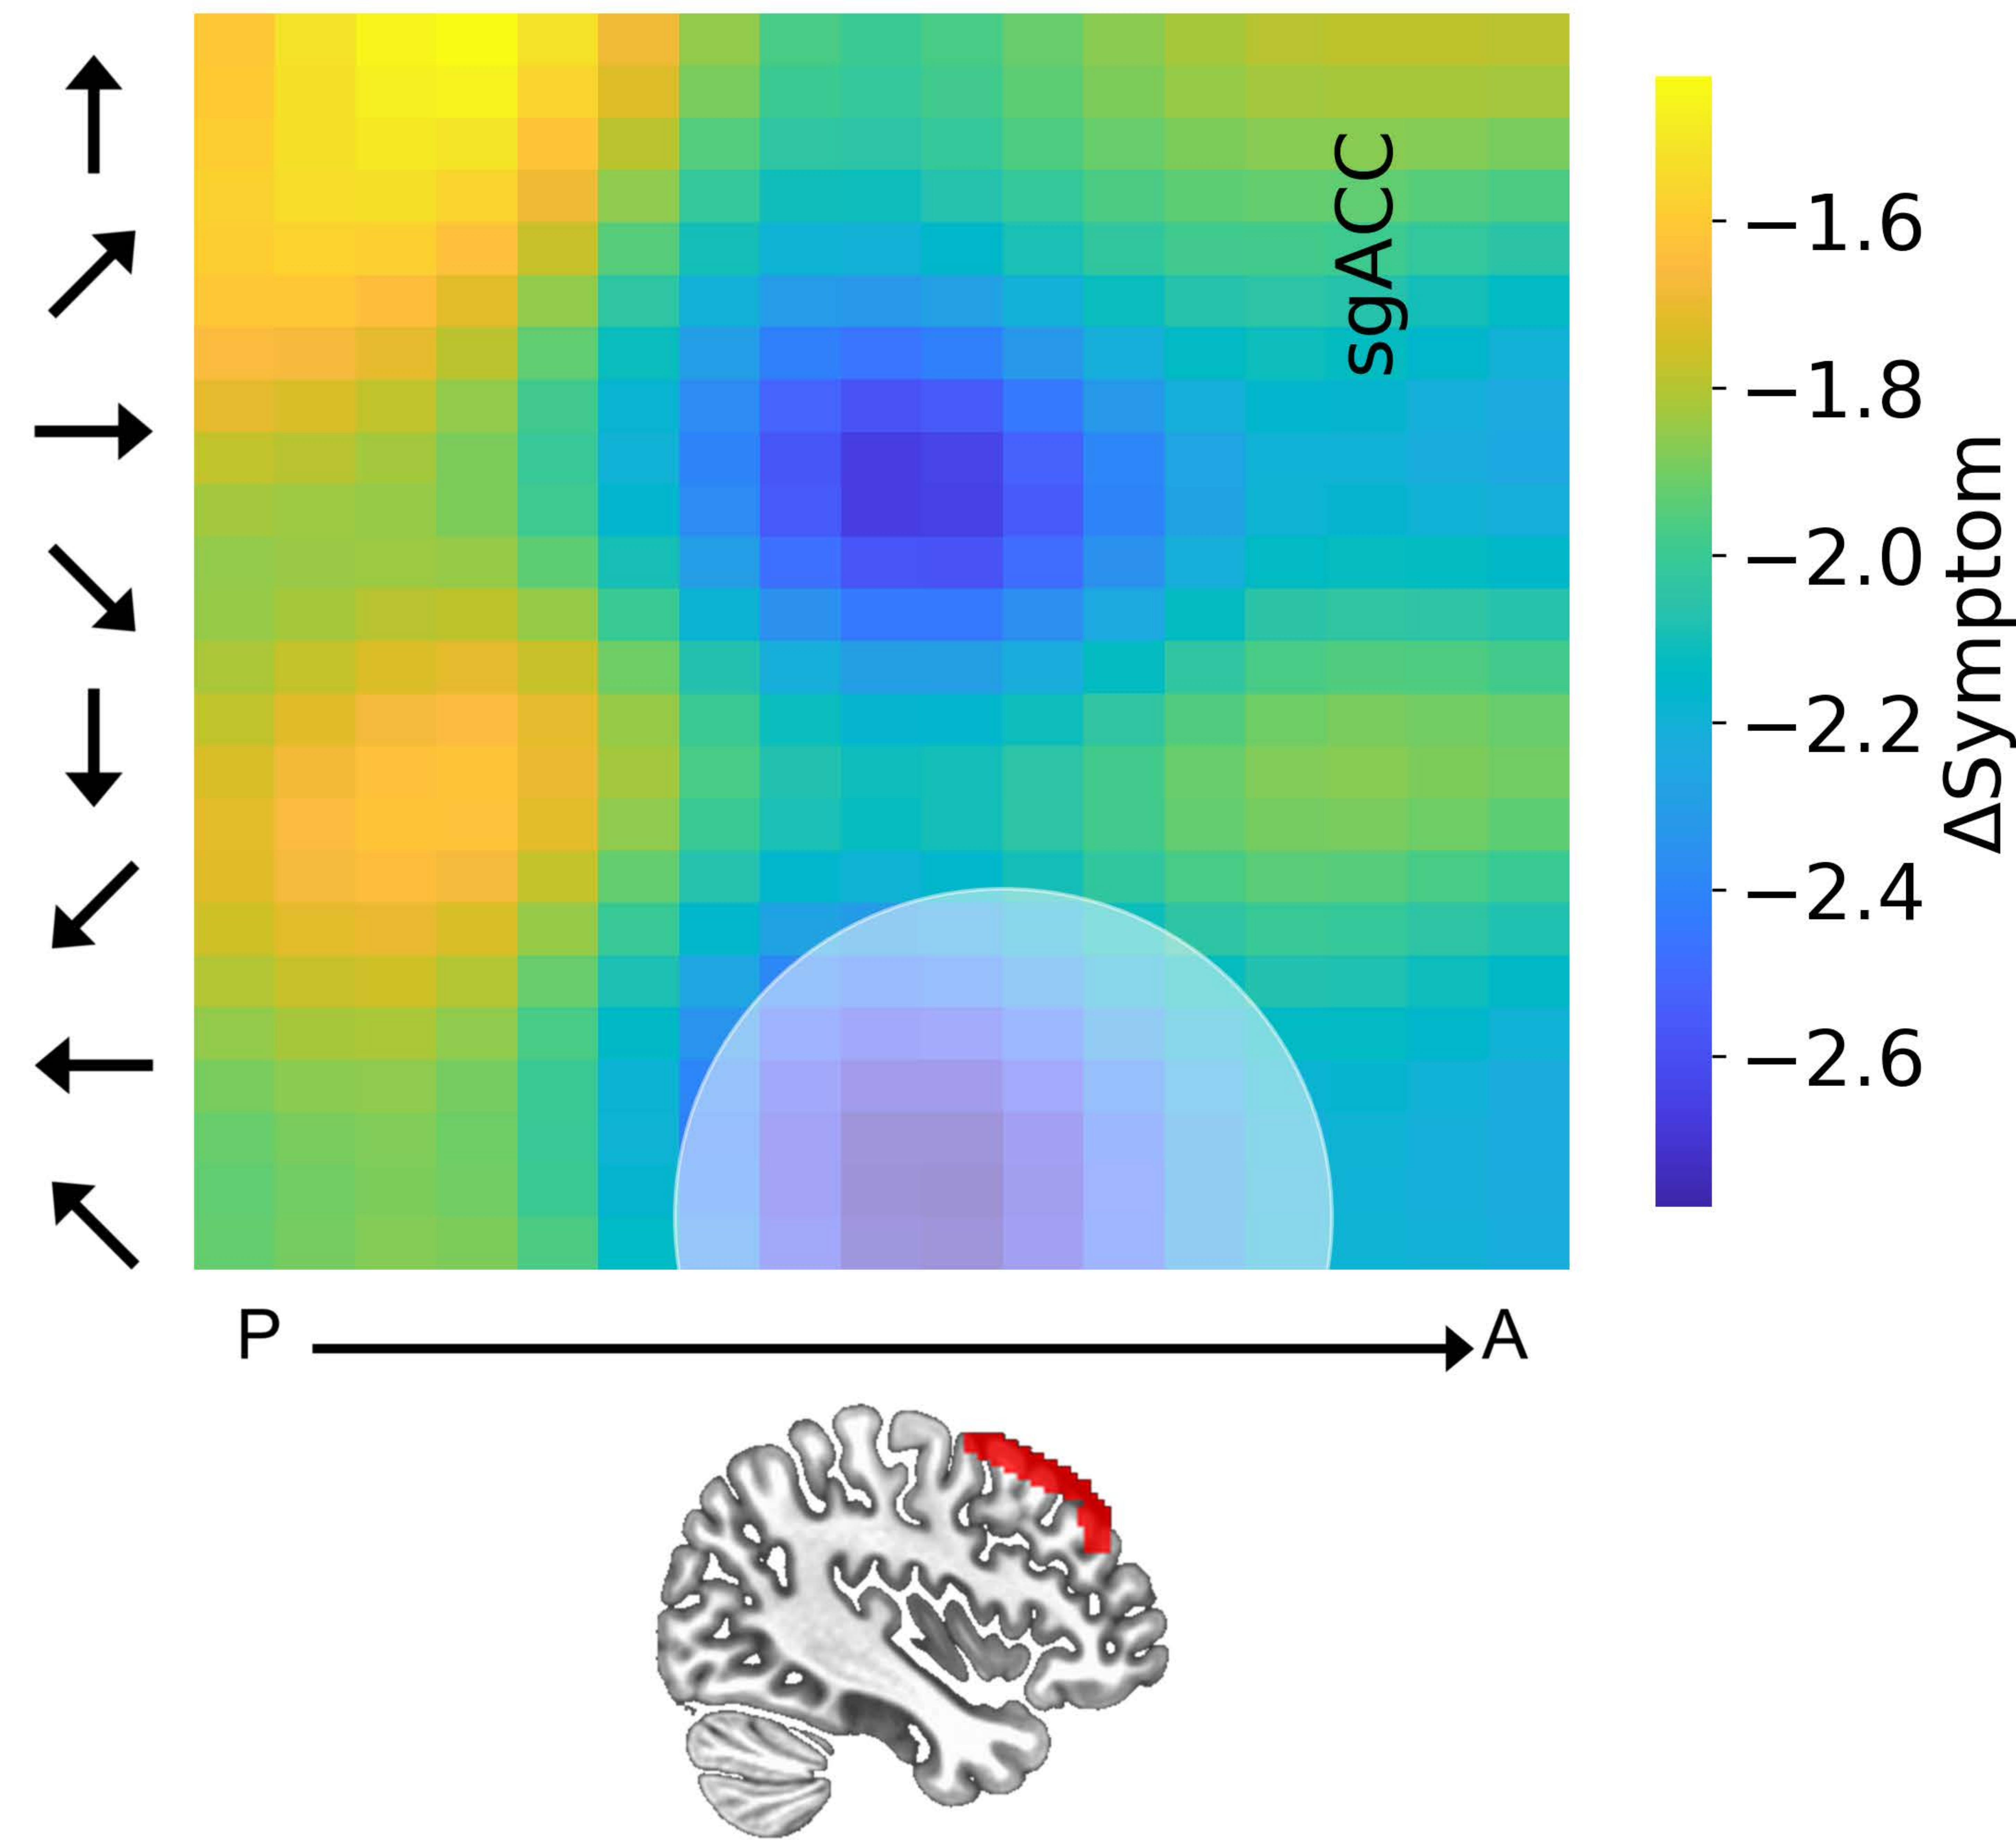



# INDARJF993NV1\_hamd\_right\_dlpfc

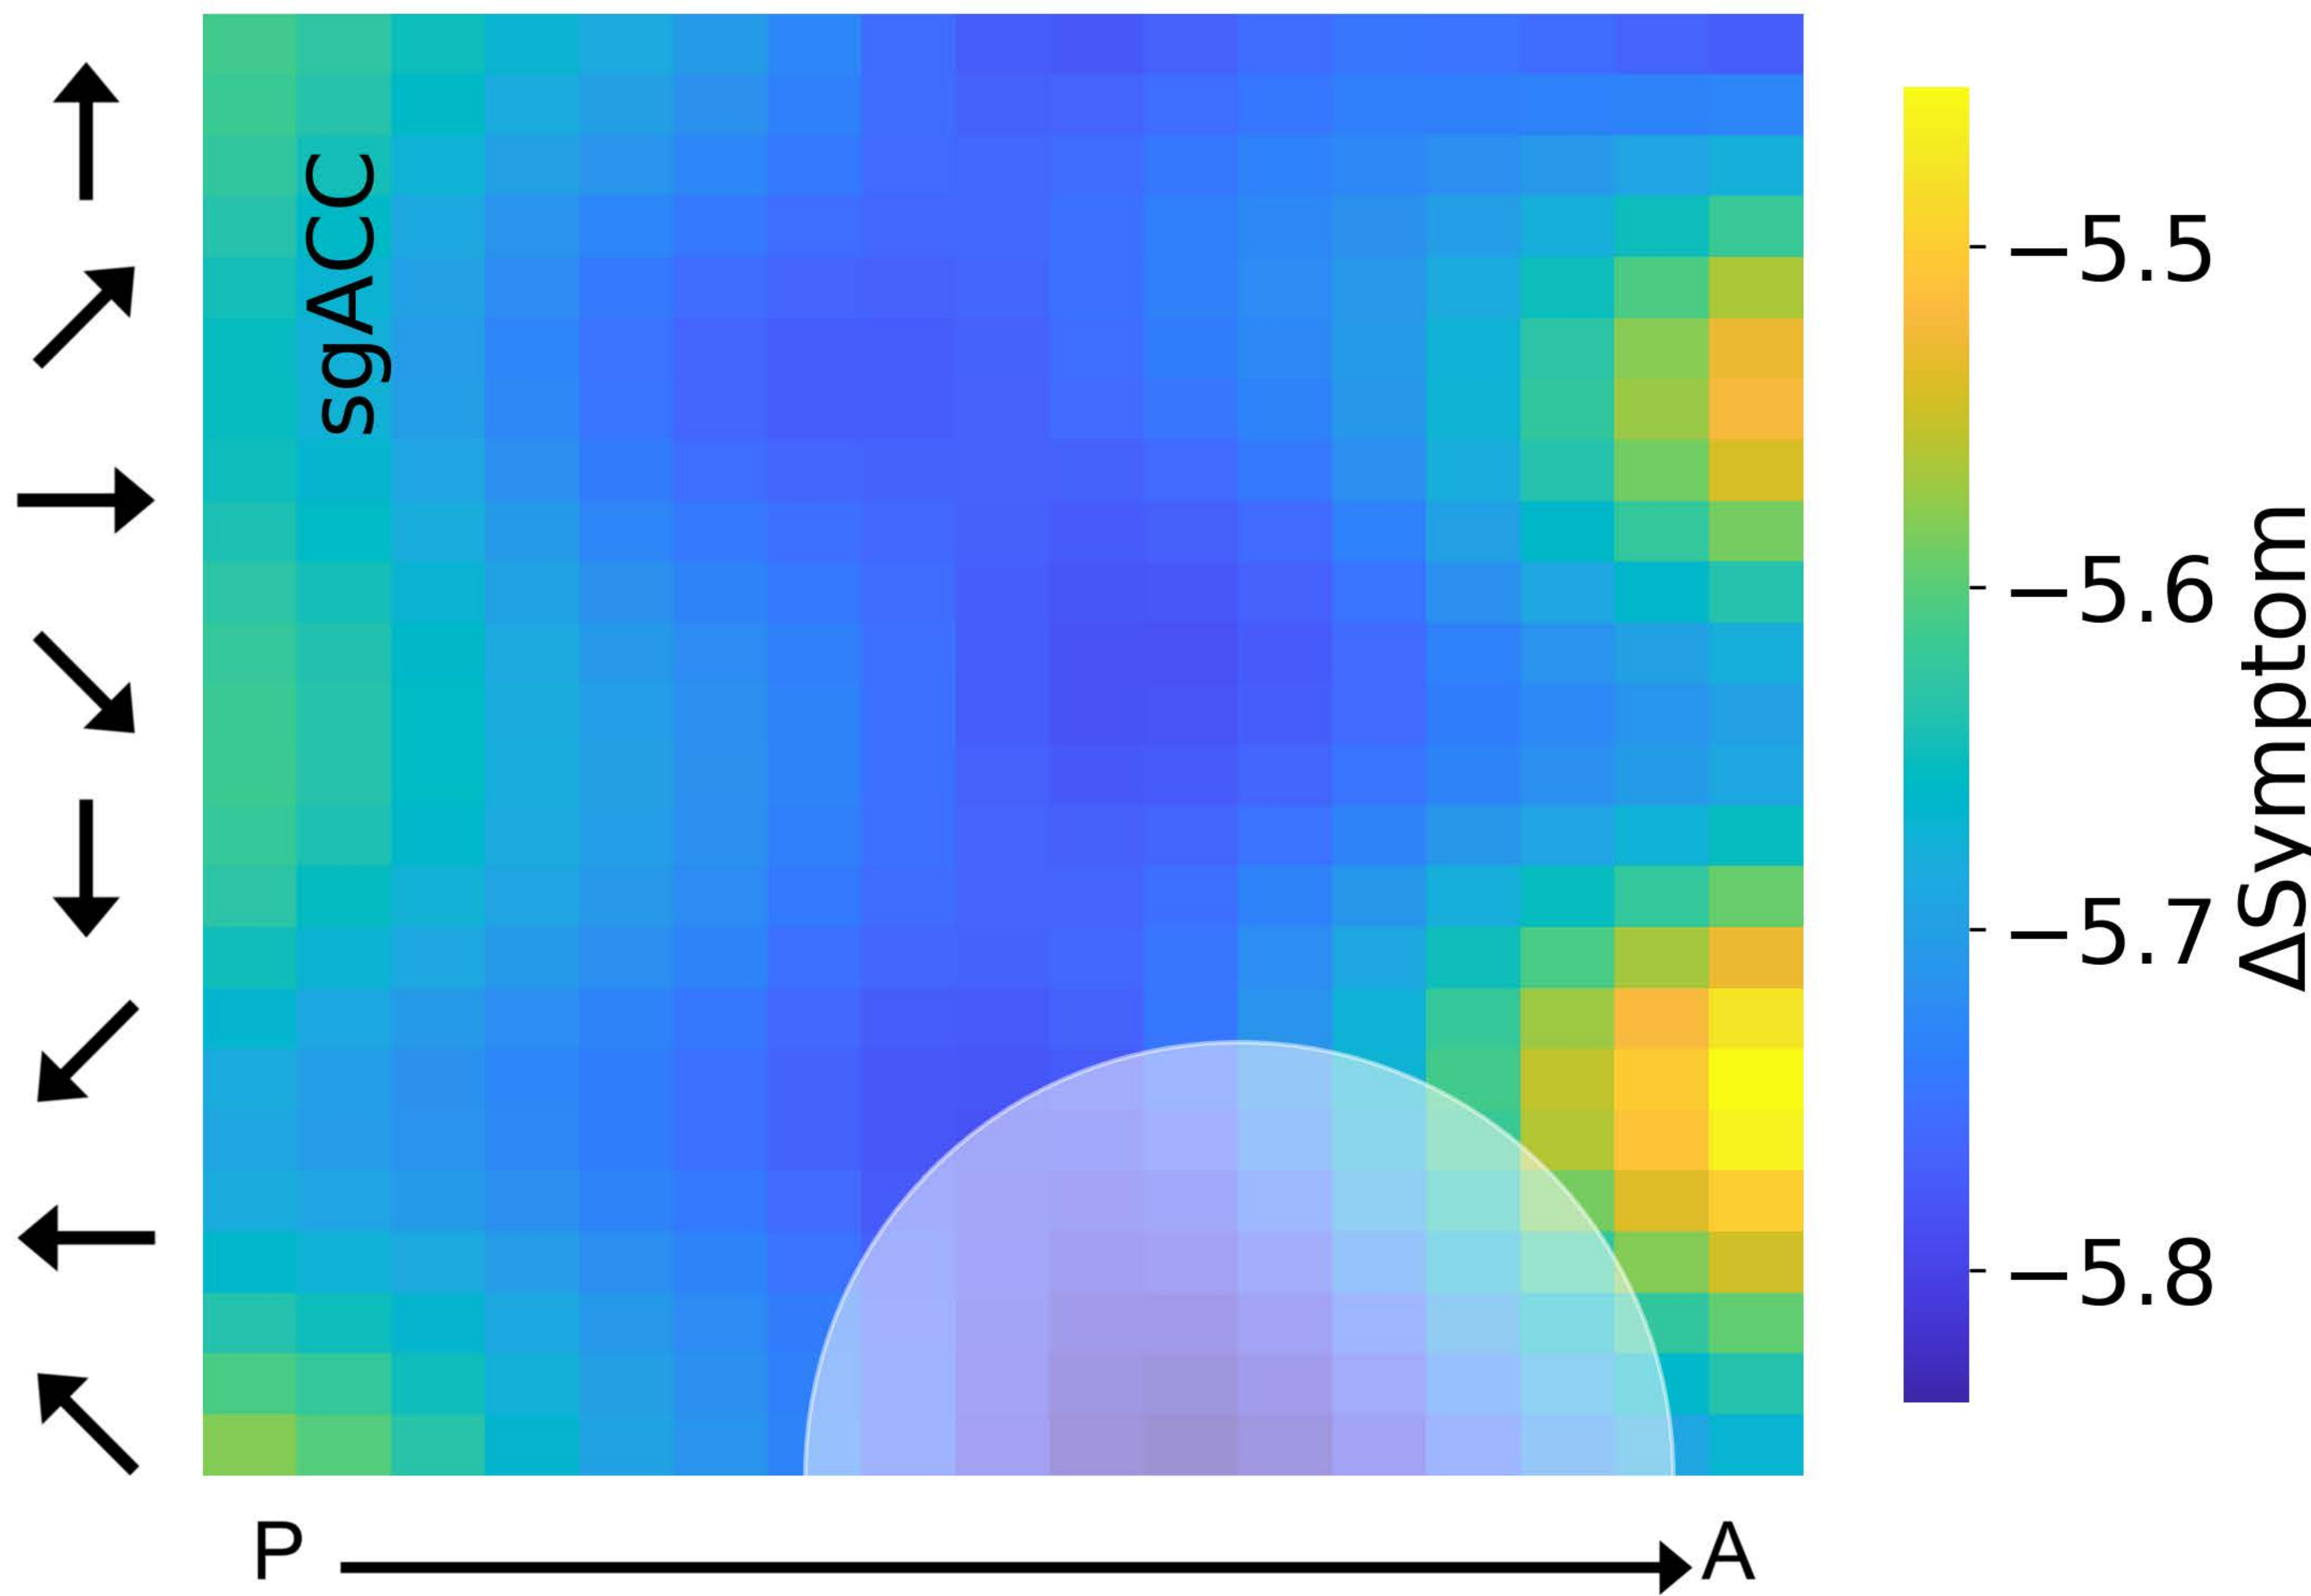



# NDARJH406WC9\_hamd\_right\_dlpfc

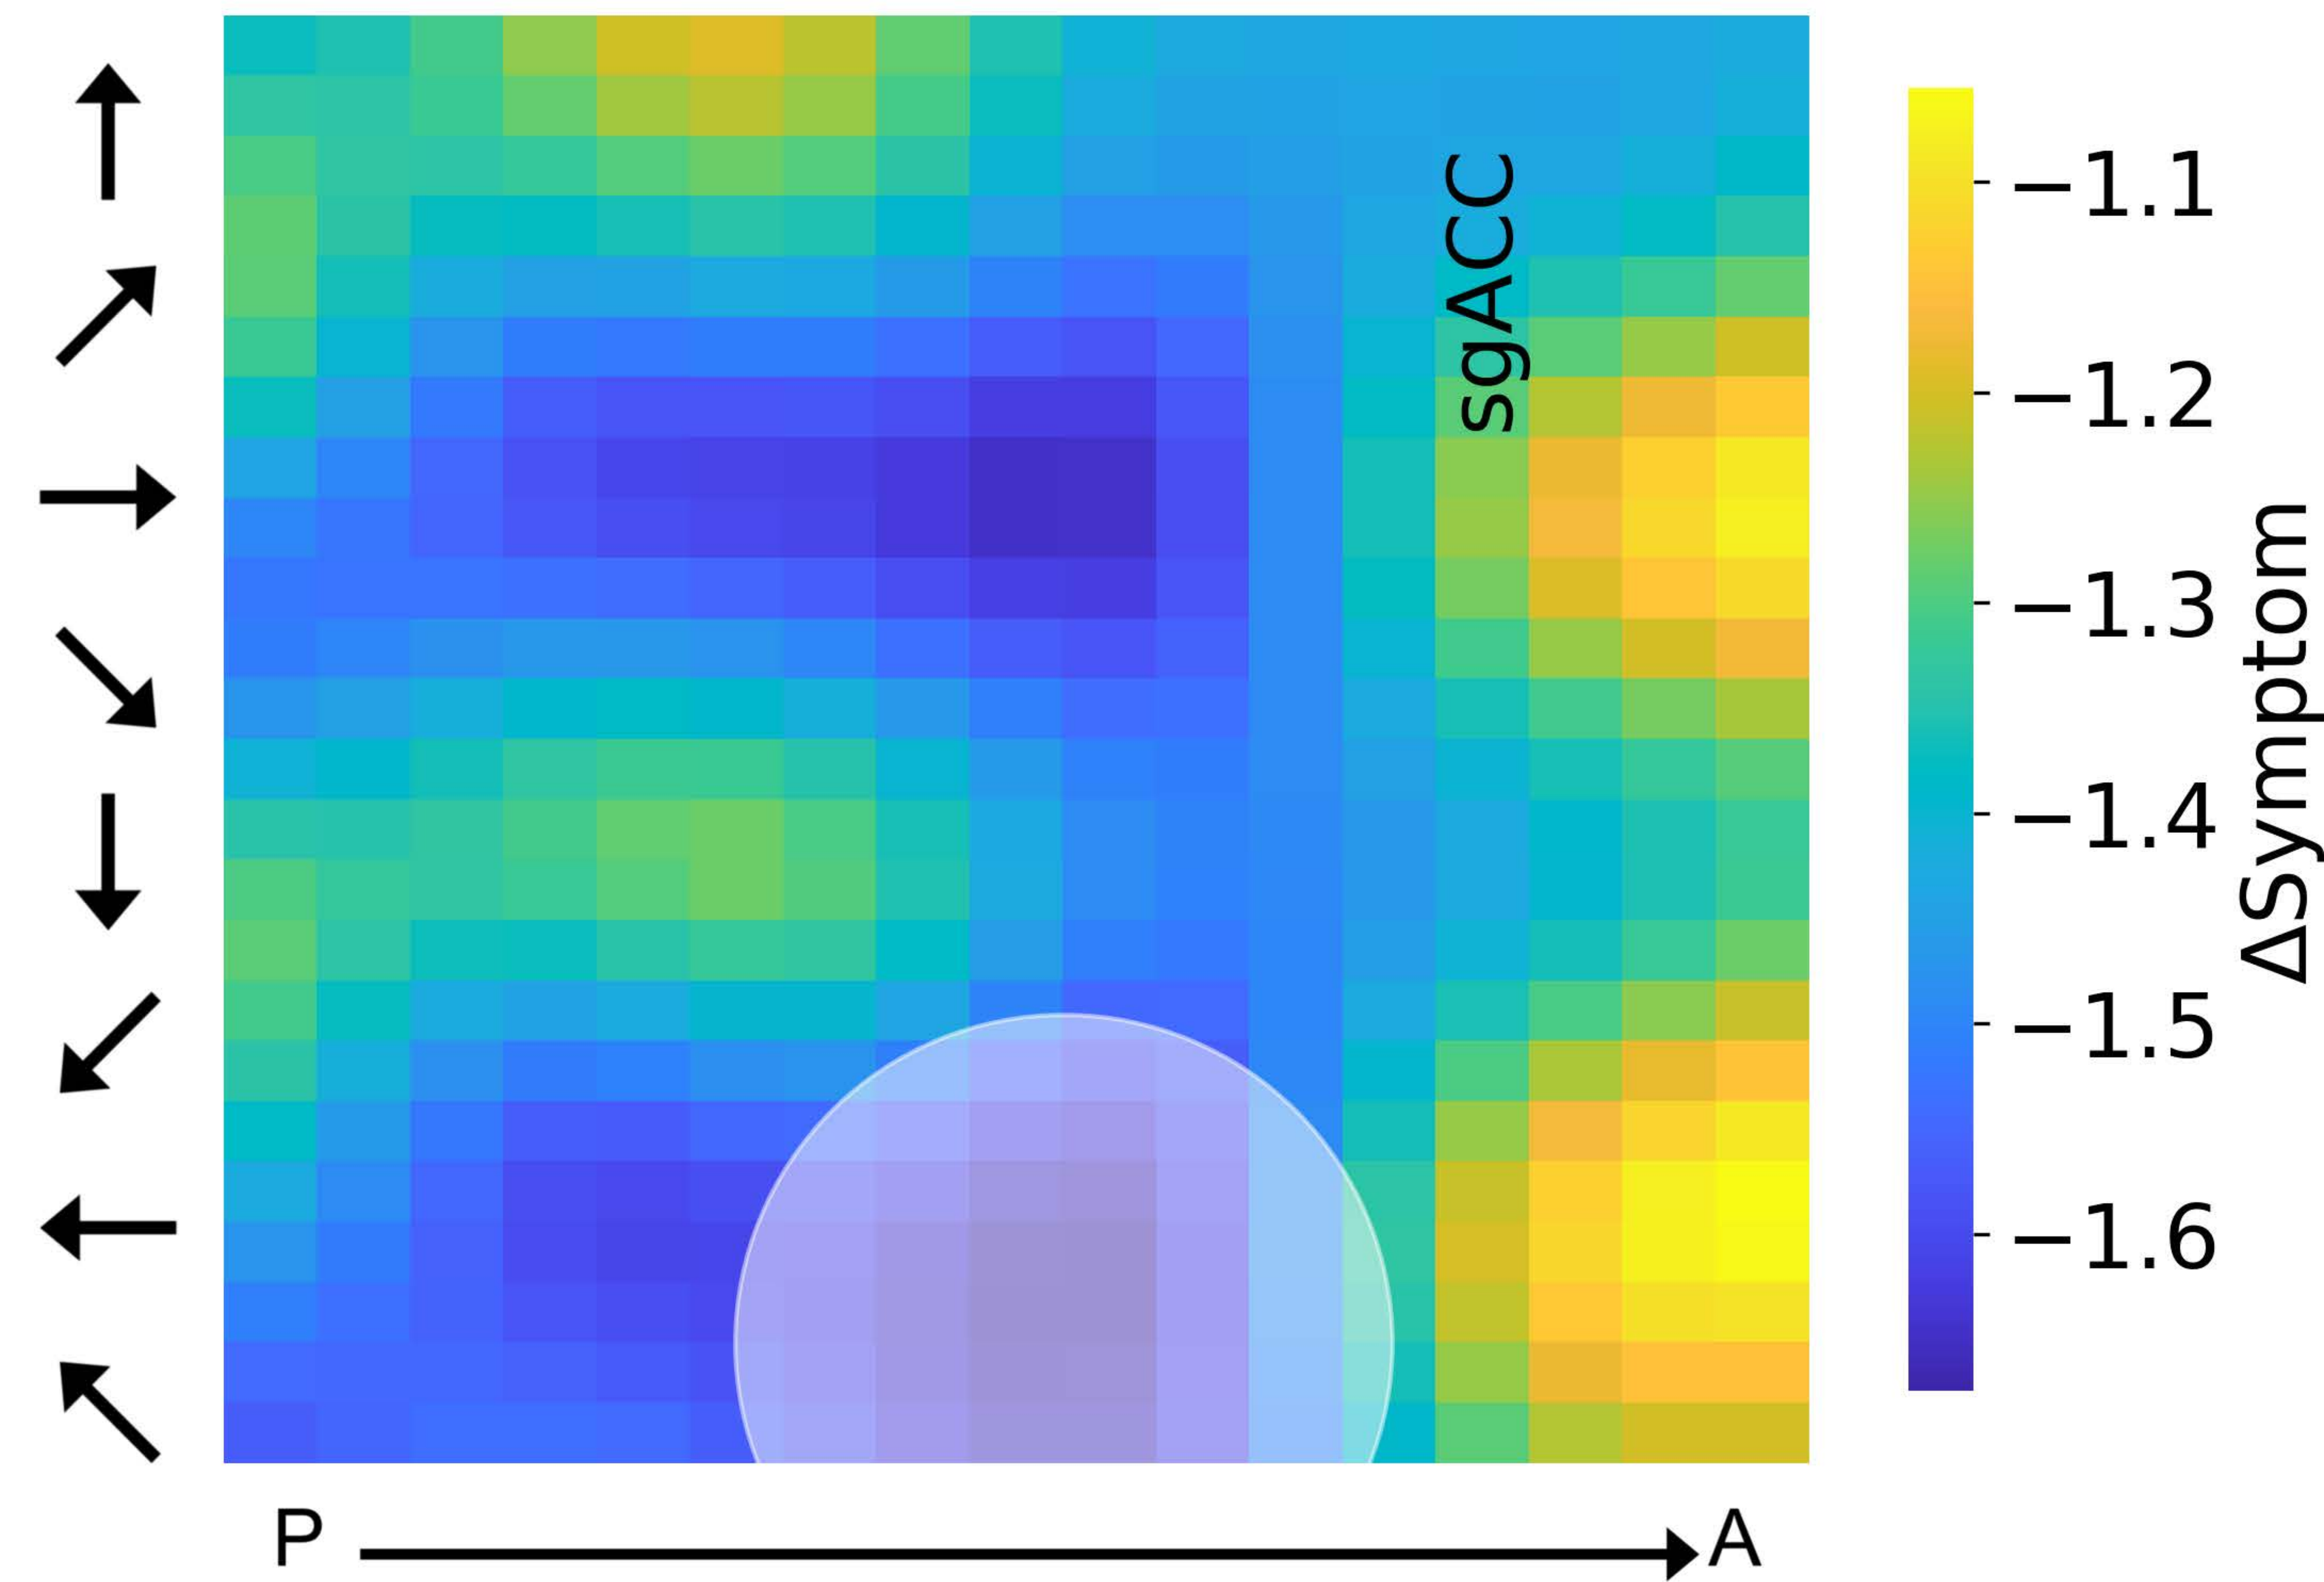



# INDARJX575DVK\_hamd\_right\_dlpfc

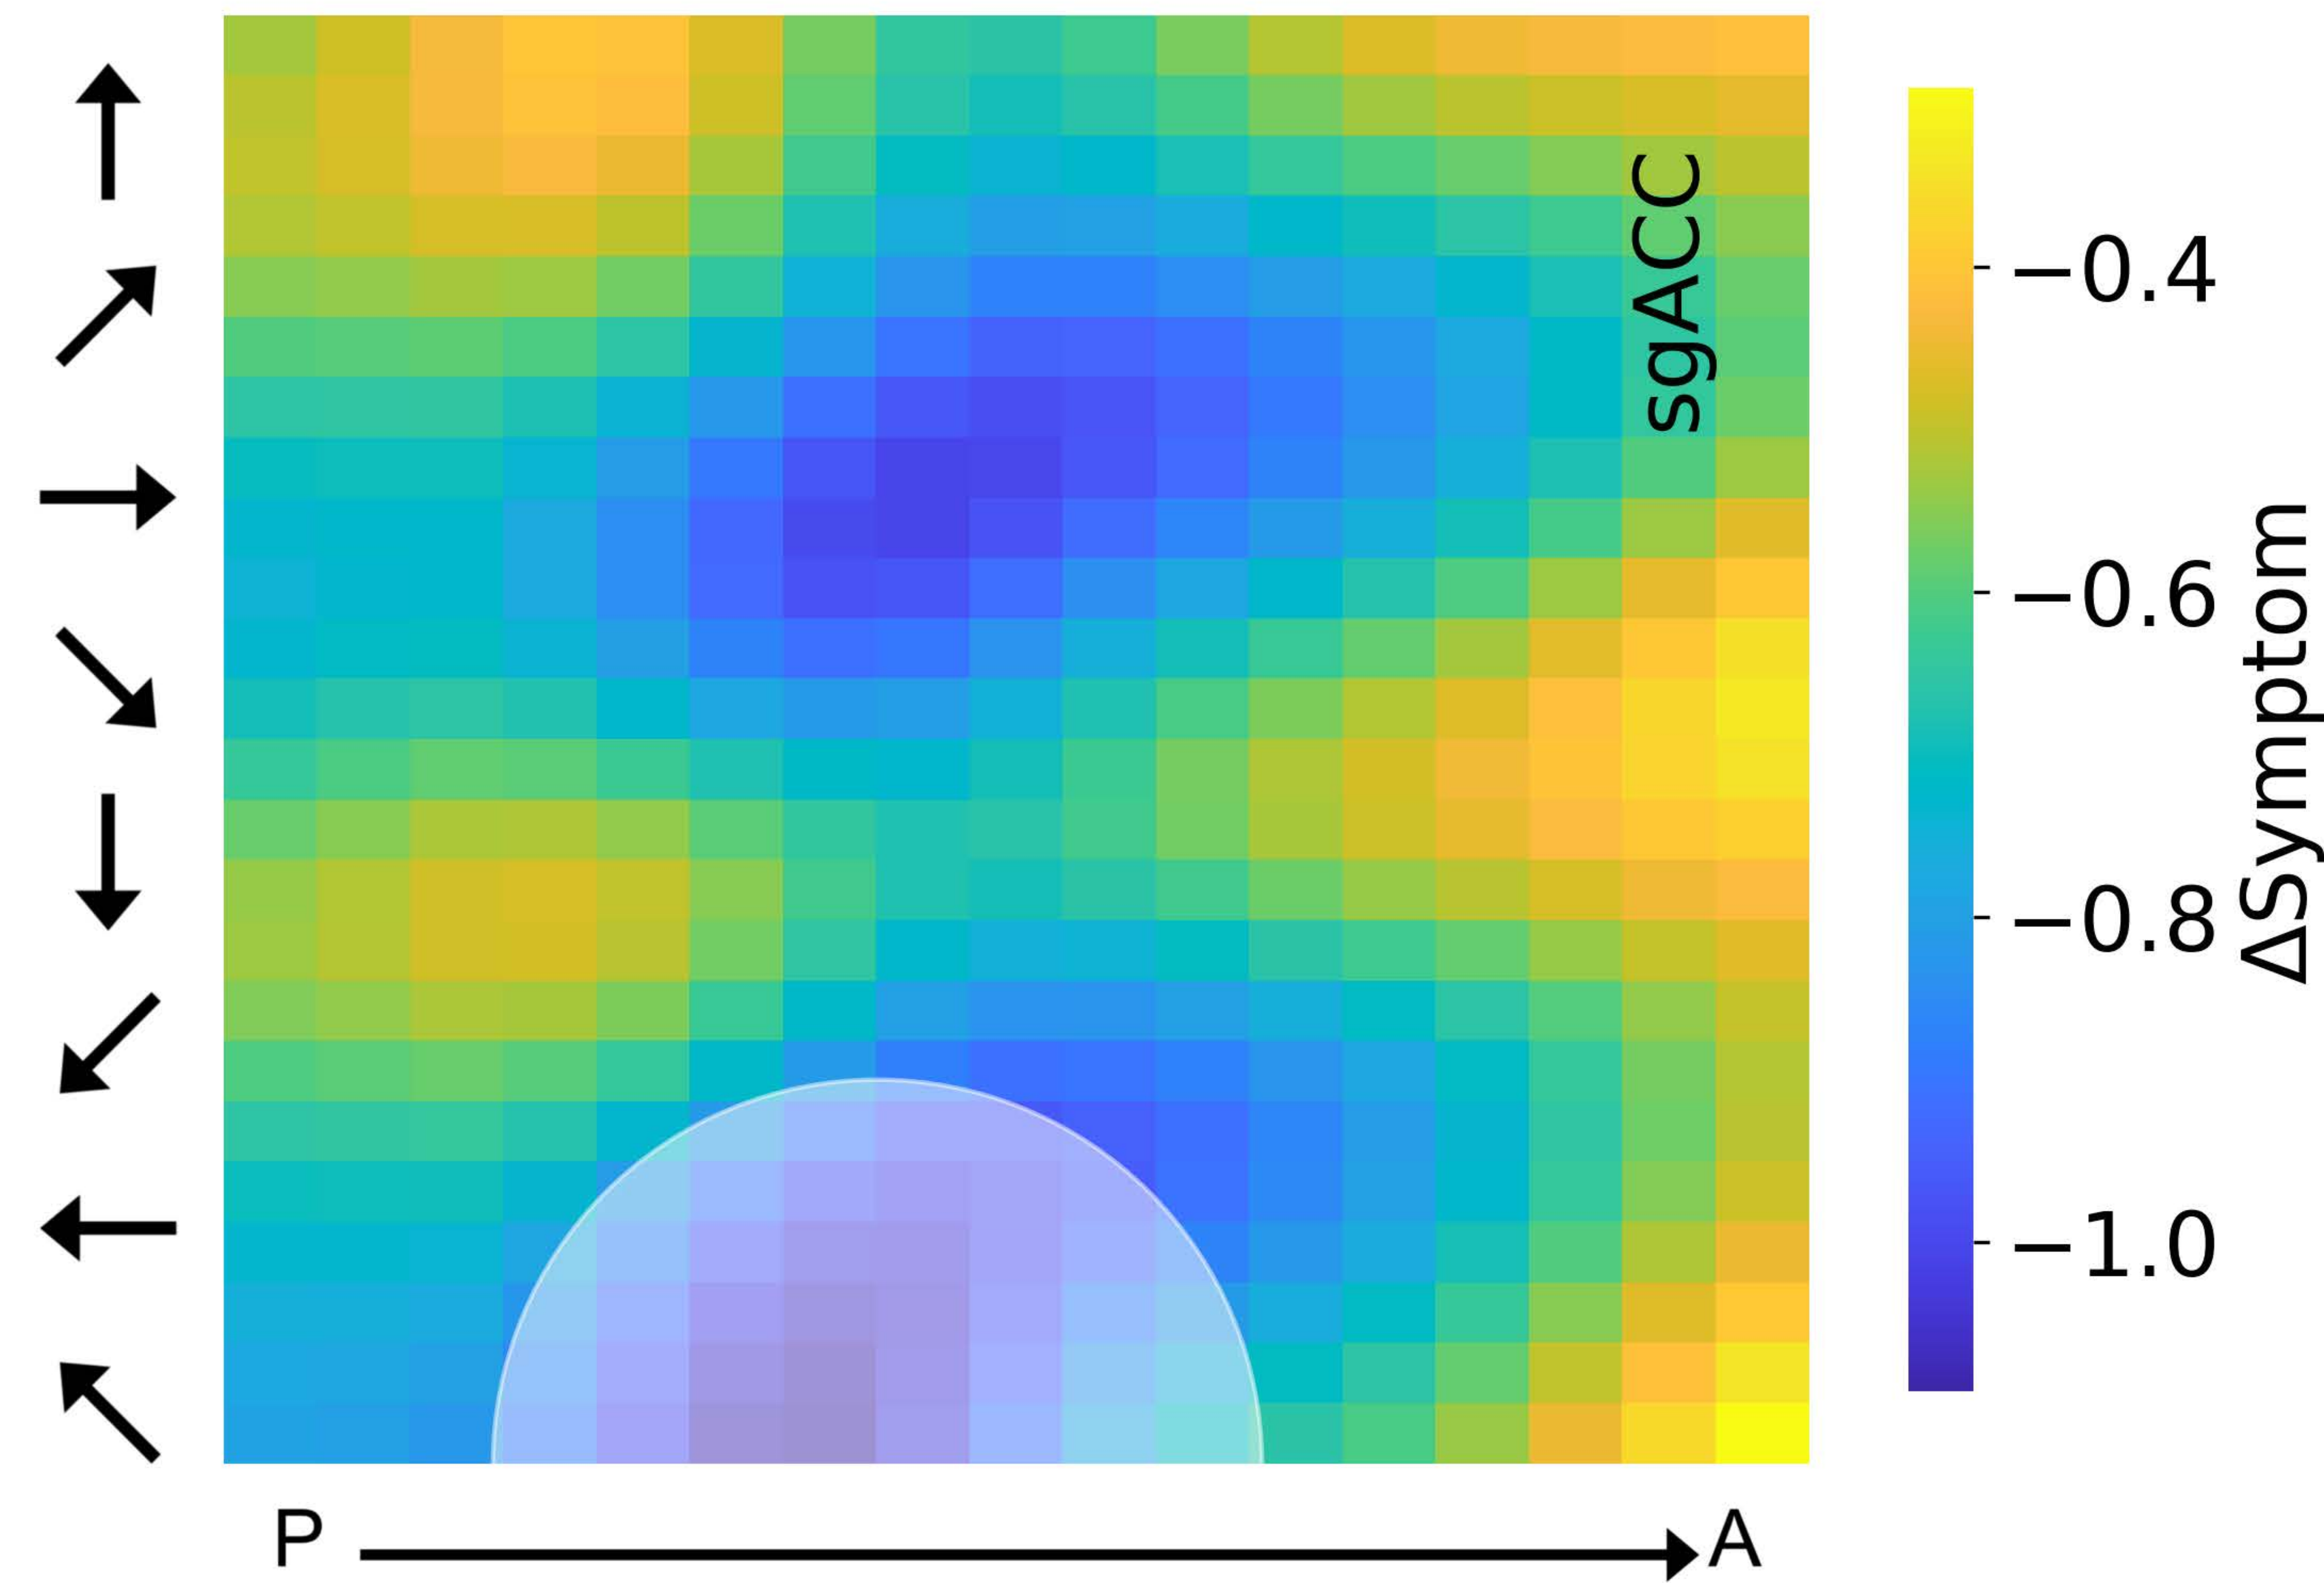



# NDARJY042TLY\_hamd\_right\_dlpfc

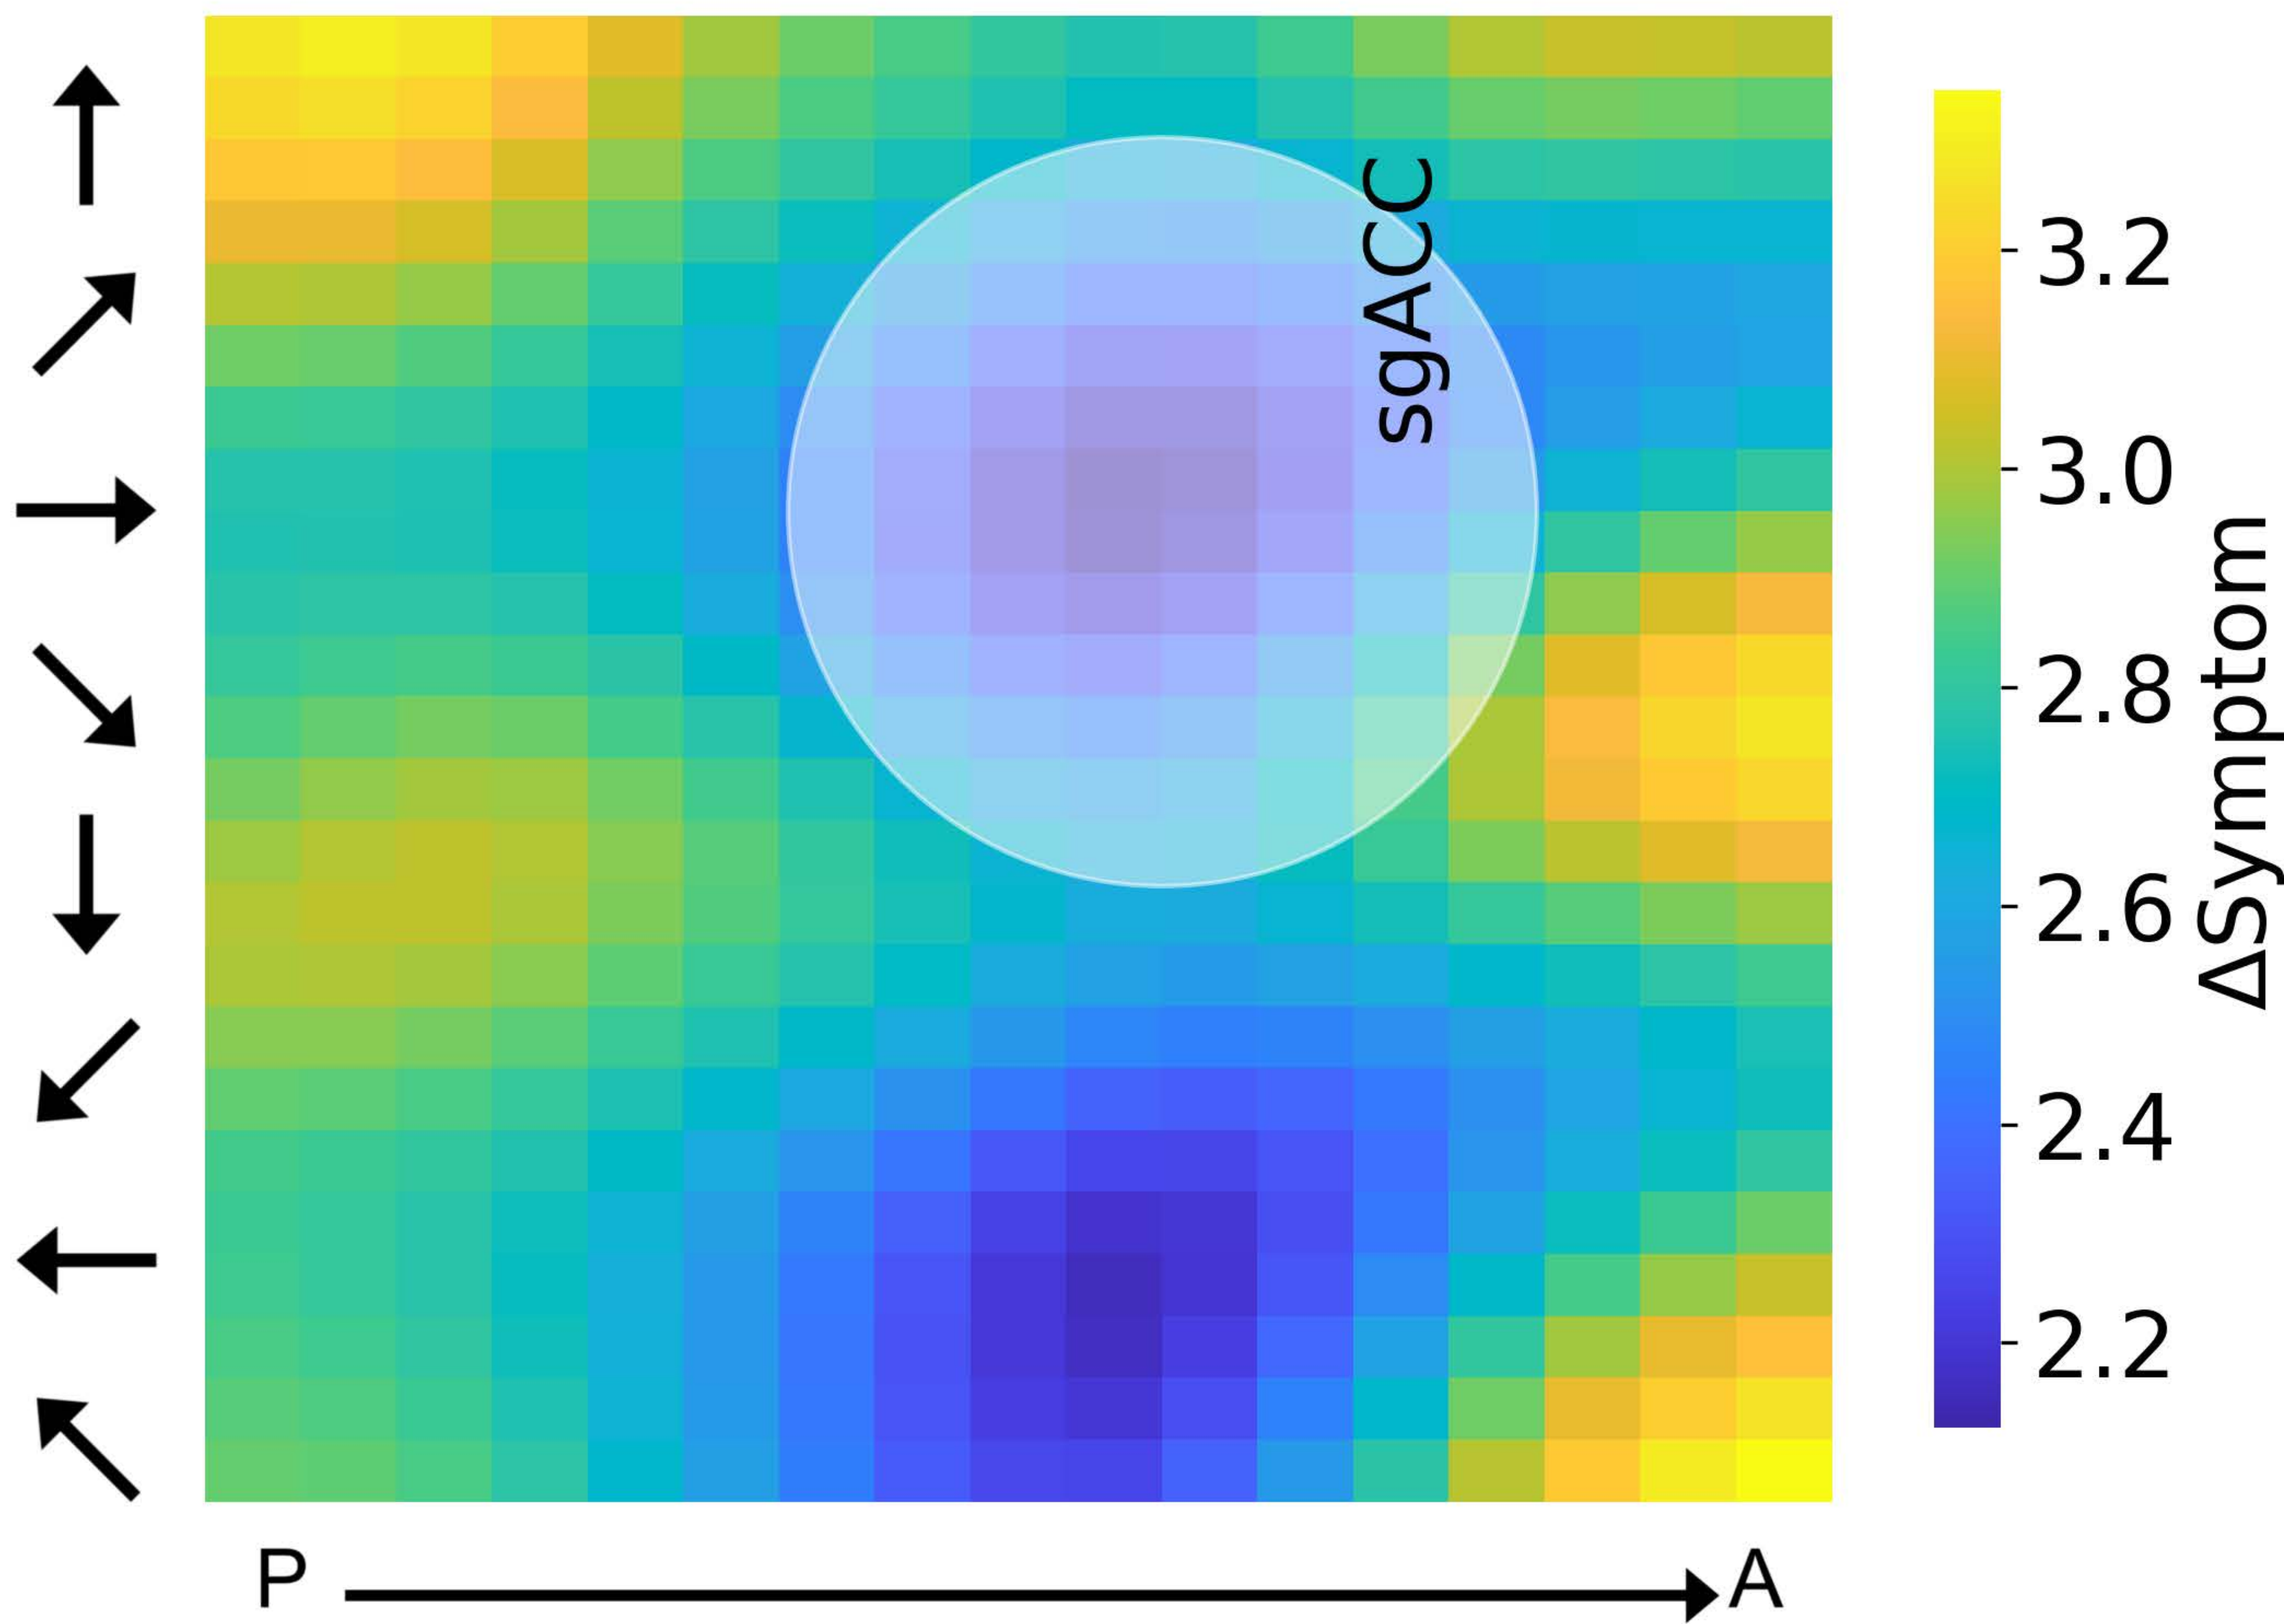



# INDARKK212YTX\_hamd\_right\_dlpfc

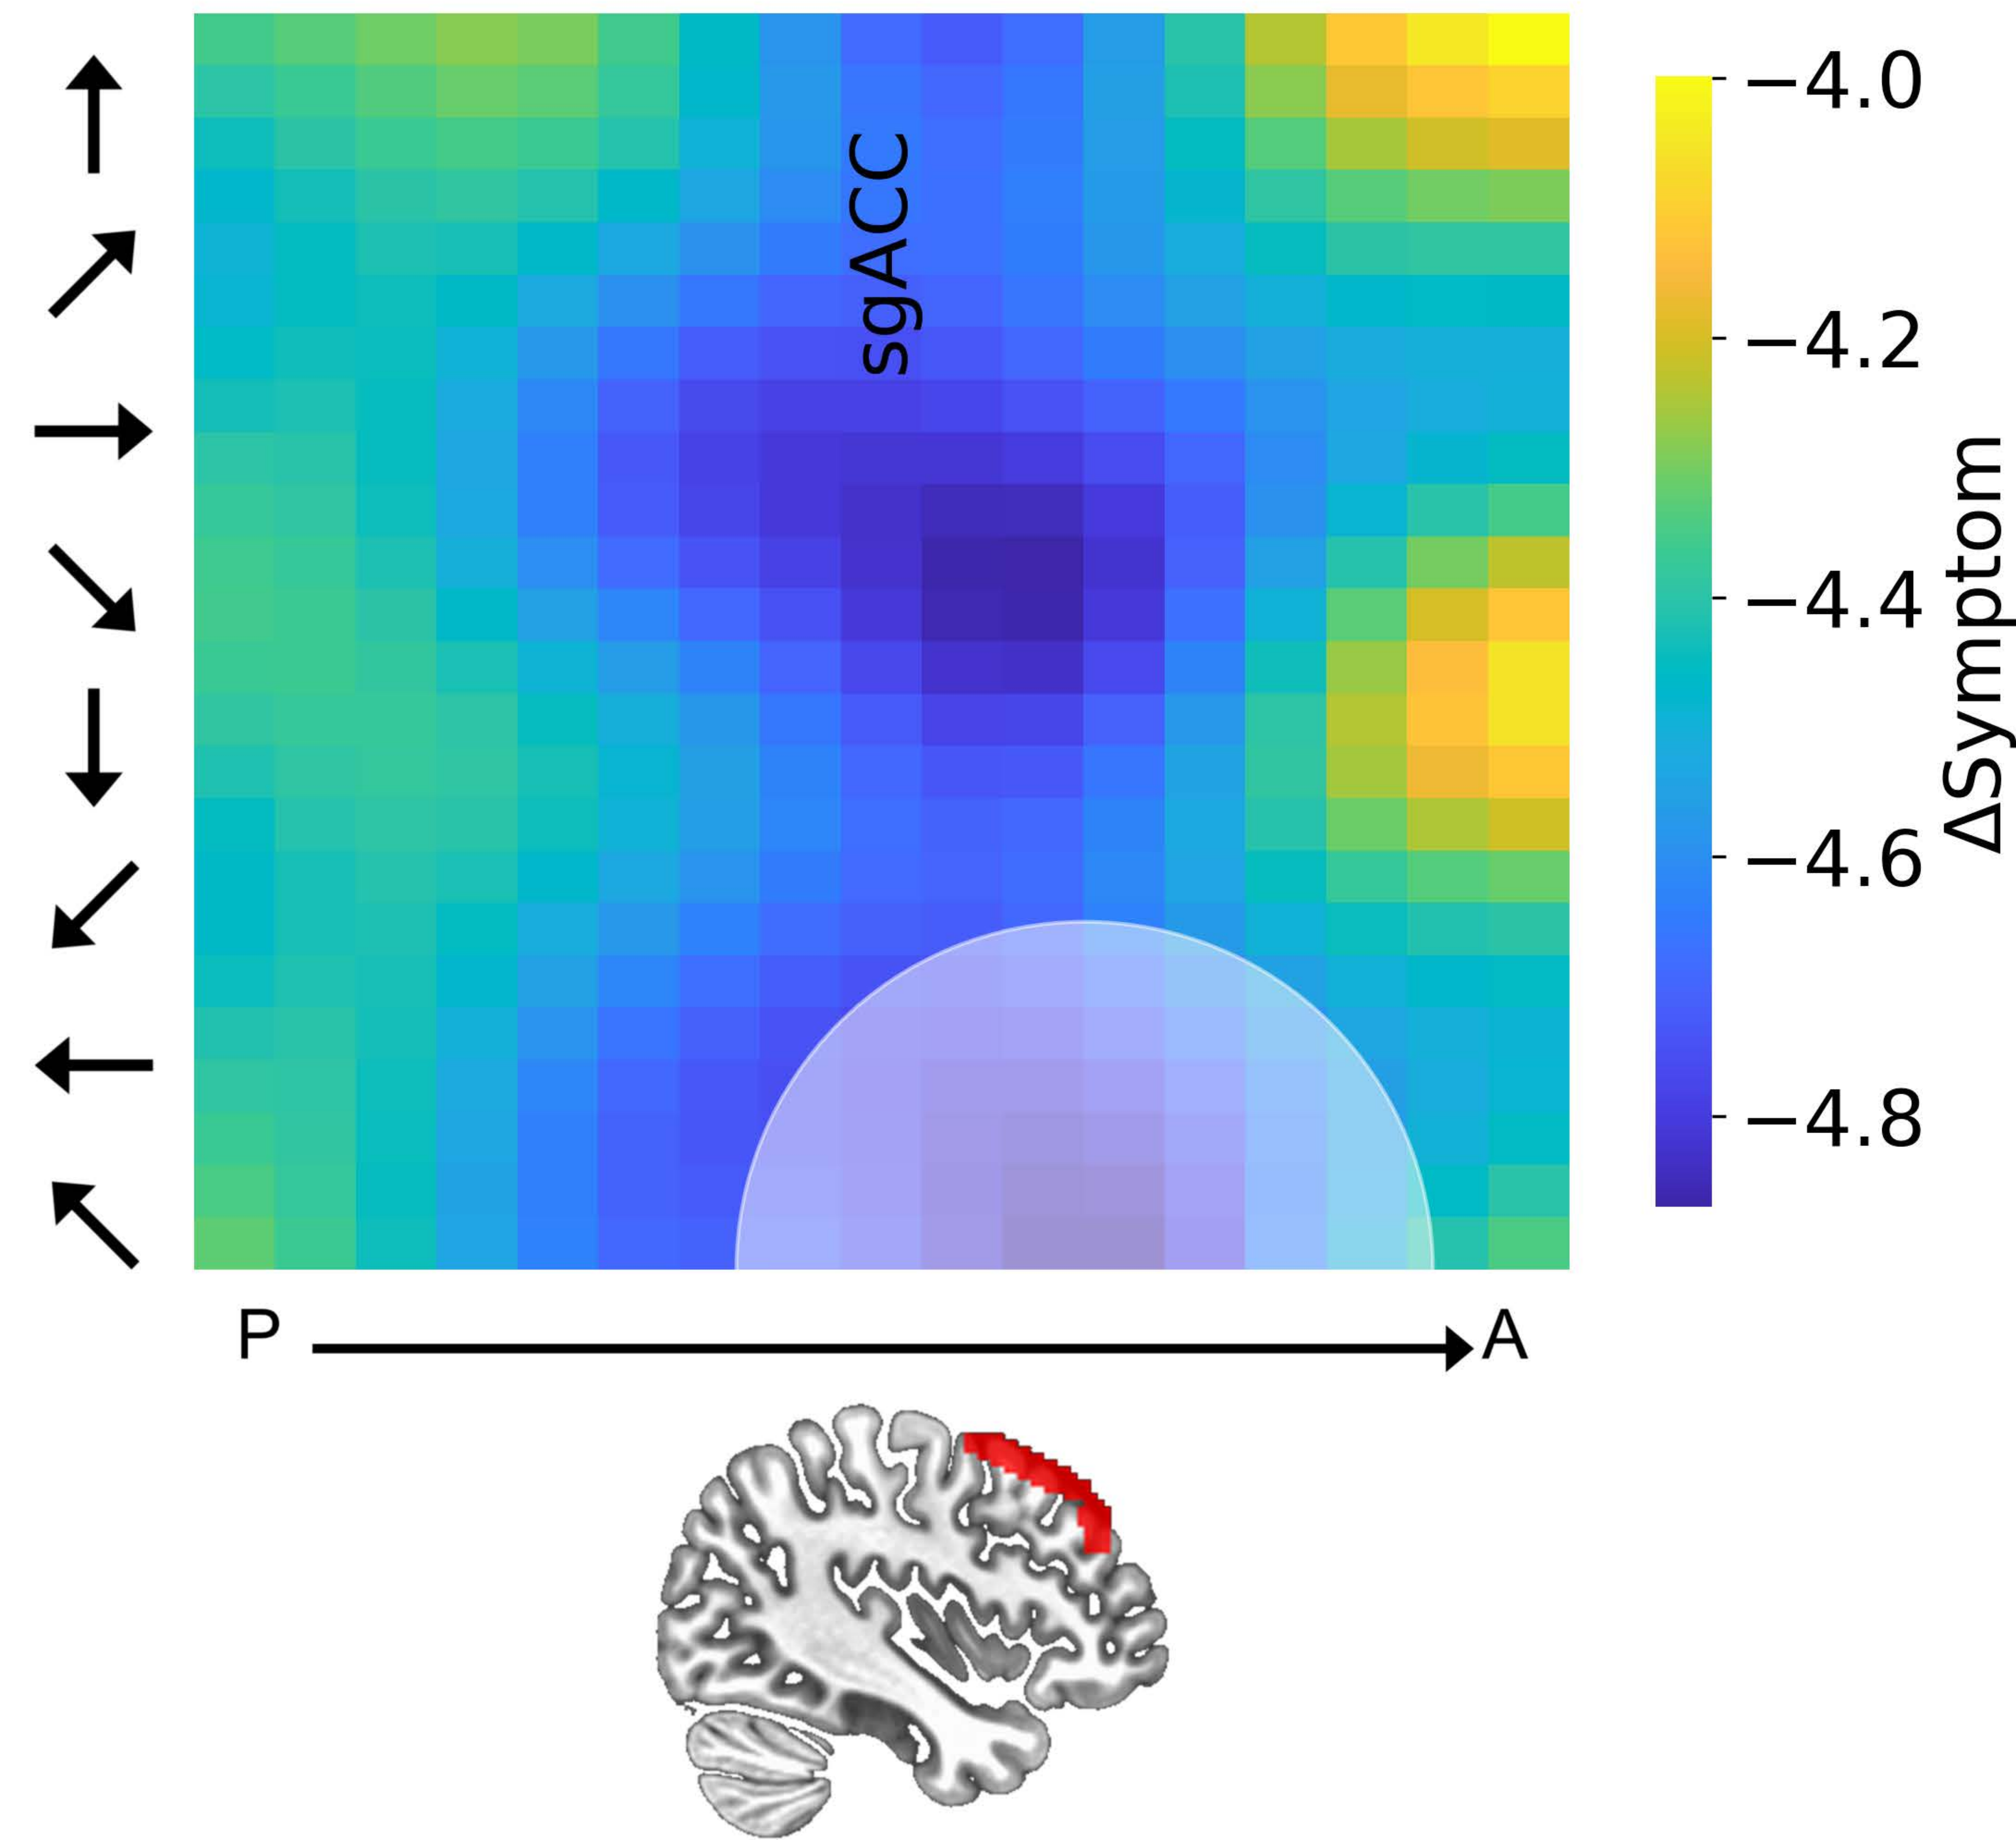



# INDARKM333VX2\_hamd\_right\_dlpfc

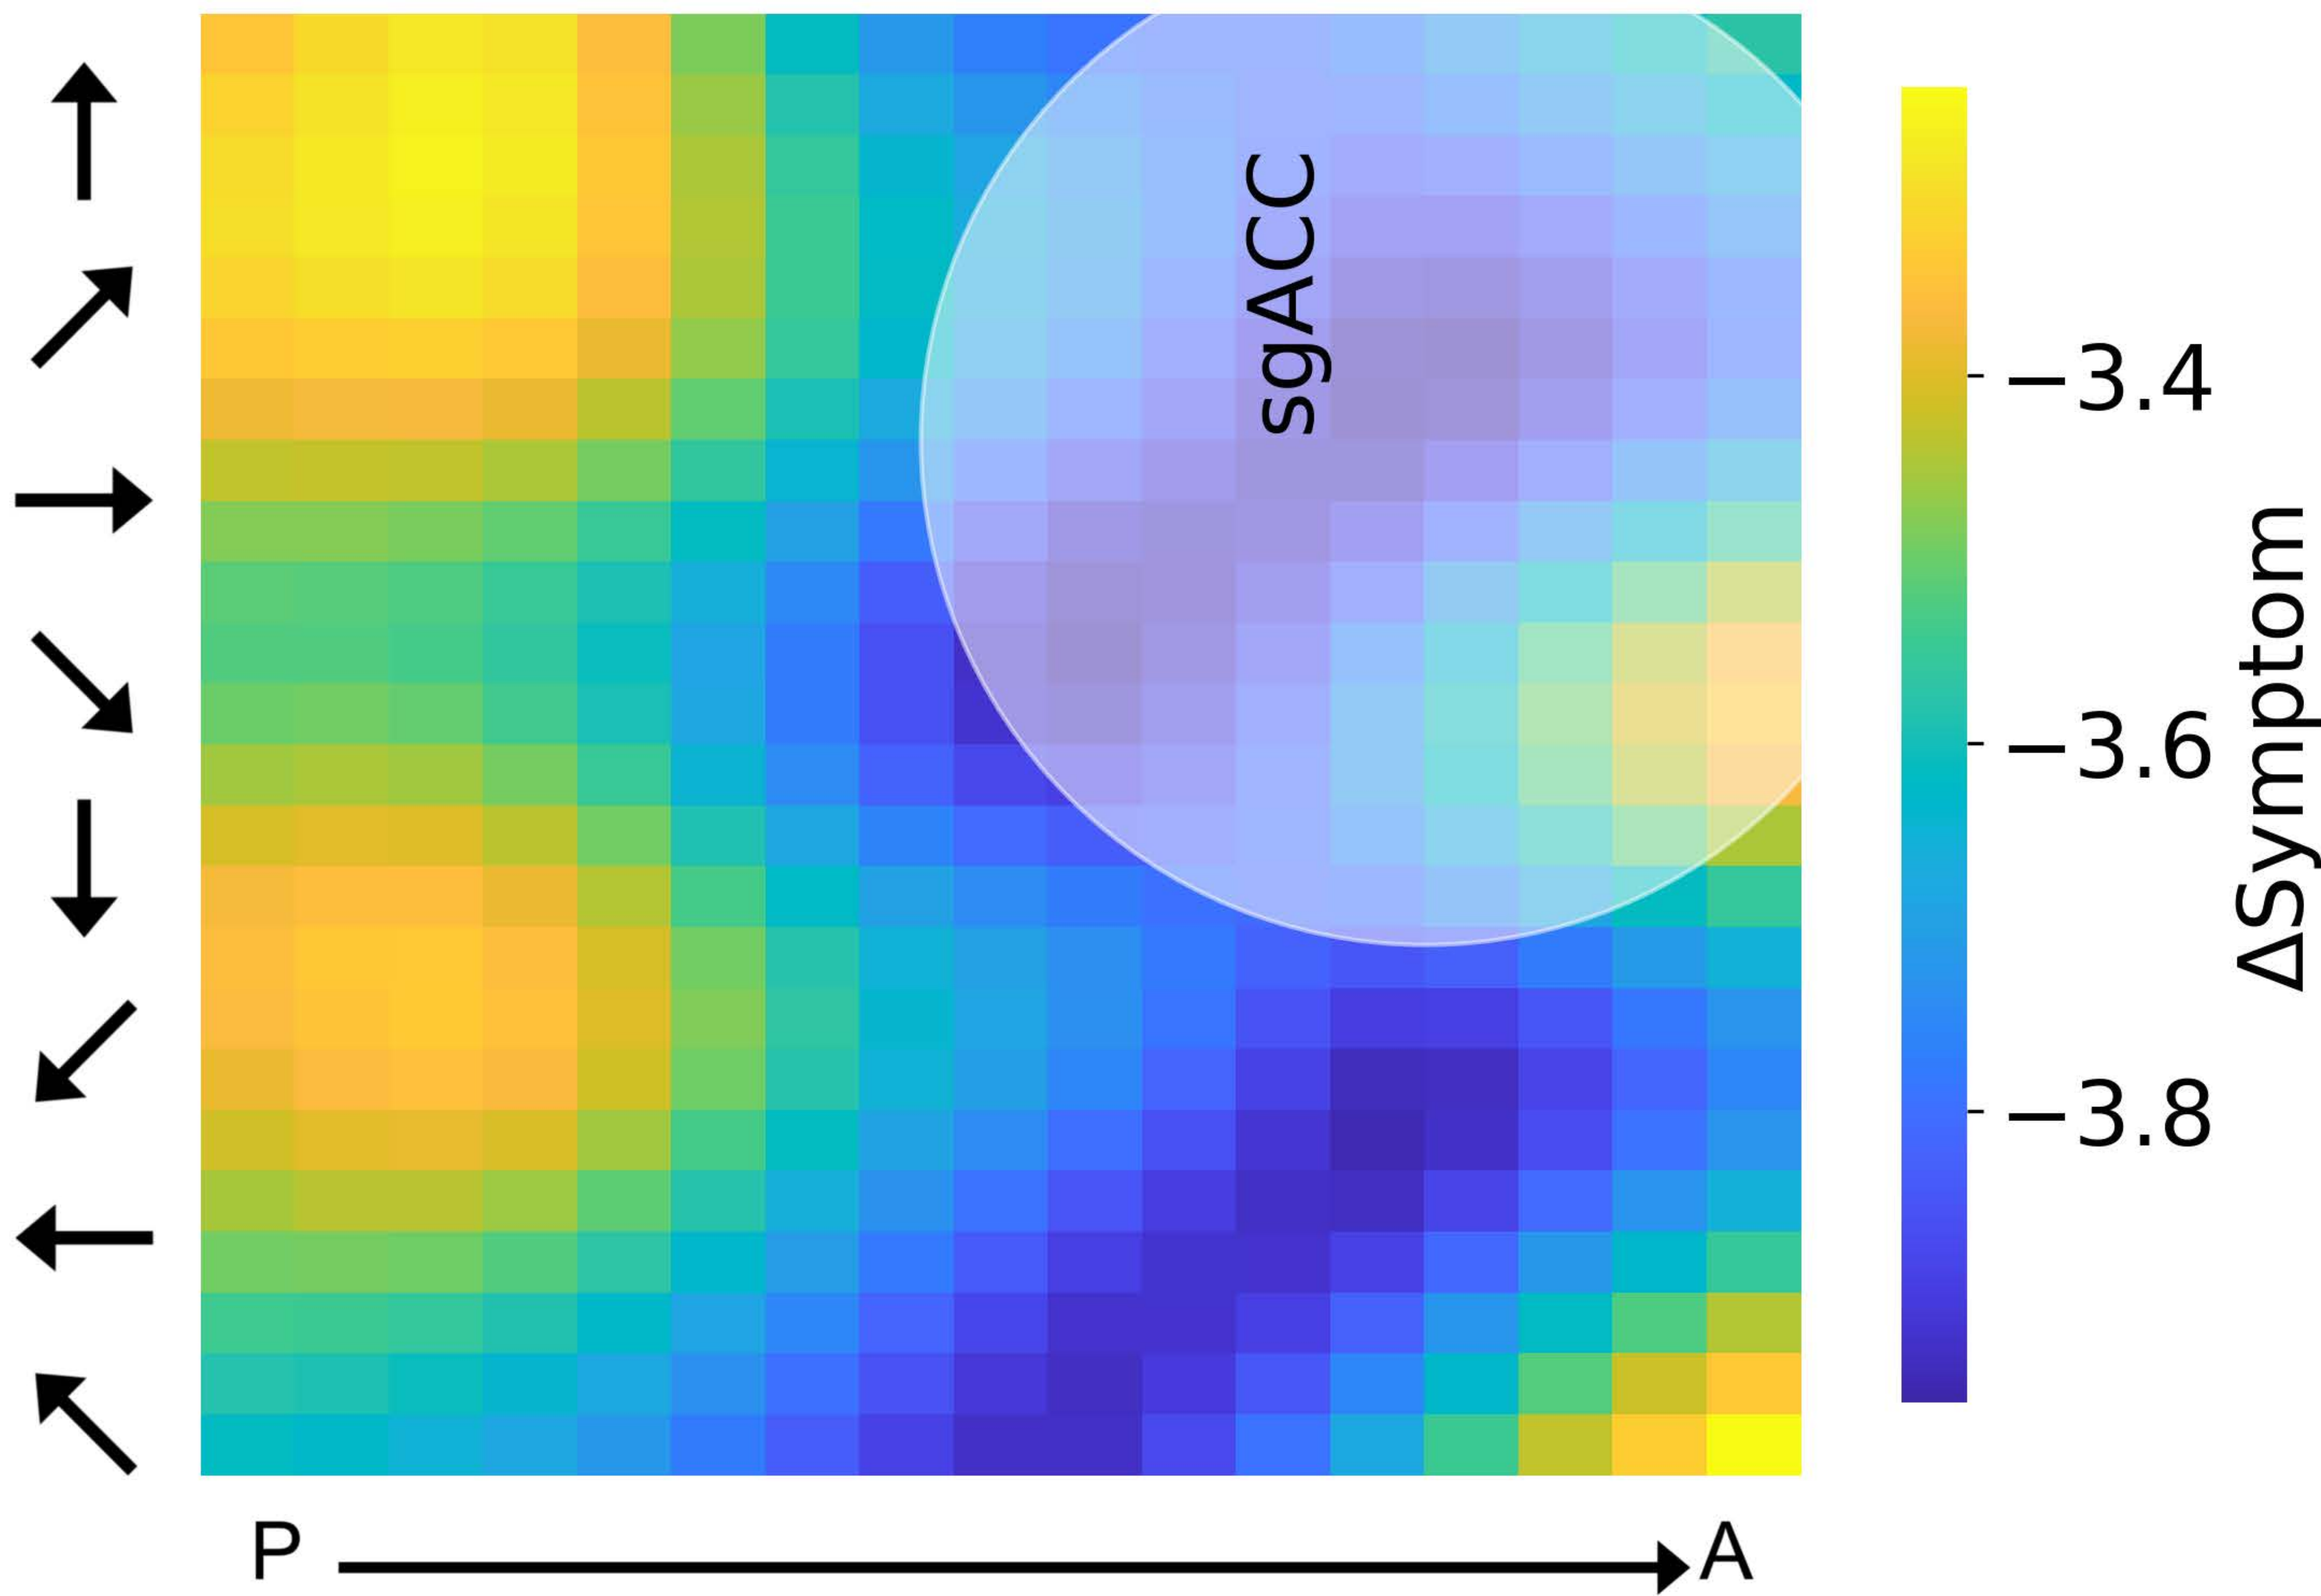



# INDARKT991DUC\_hamd\_right\_dlpfc

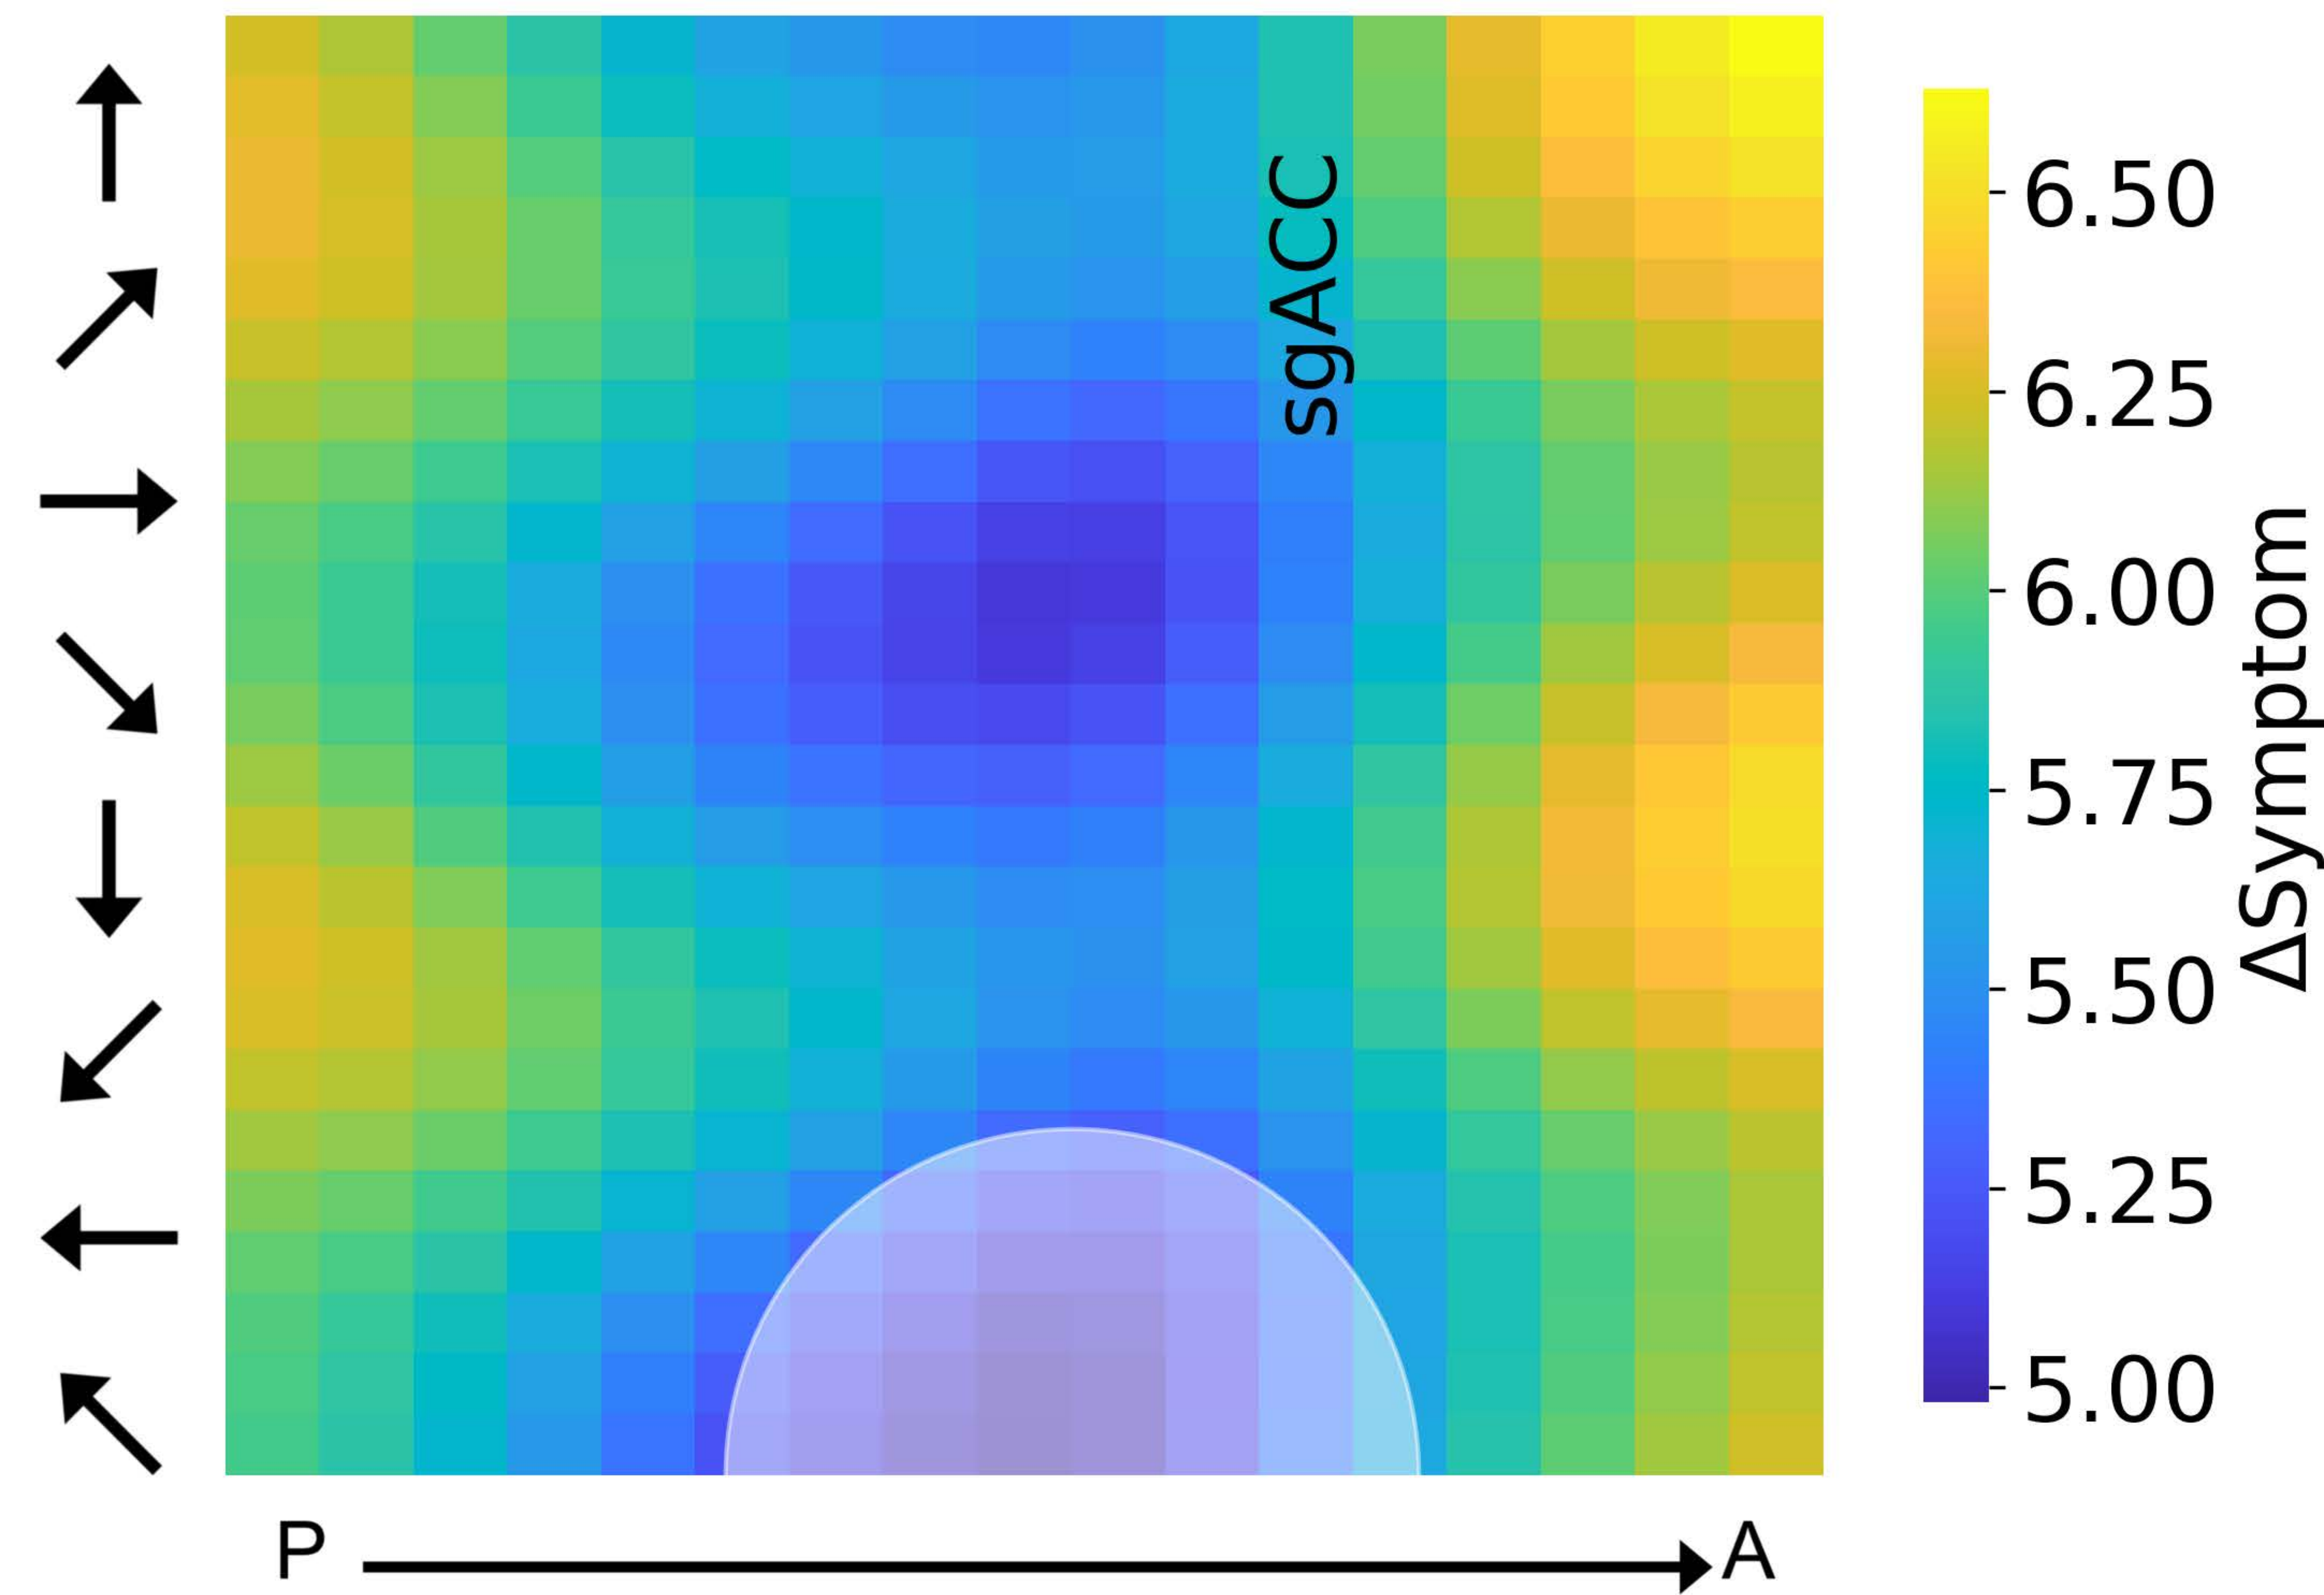



# NDARKU015LTM\_hamd\_right\_dlpfc

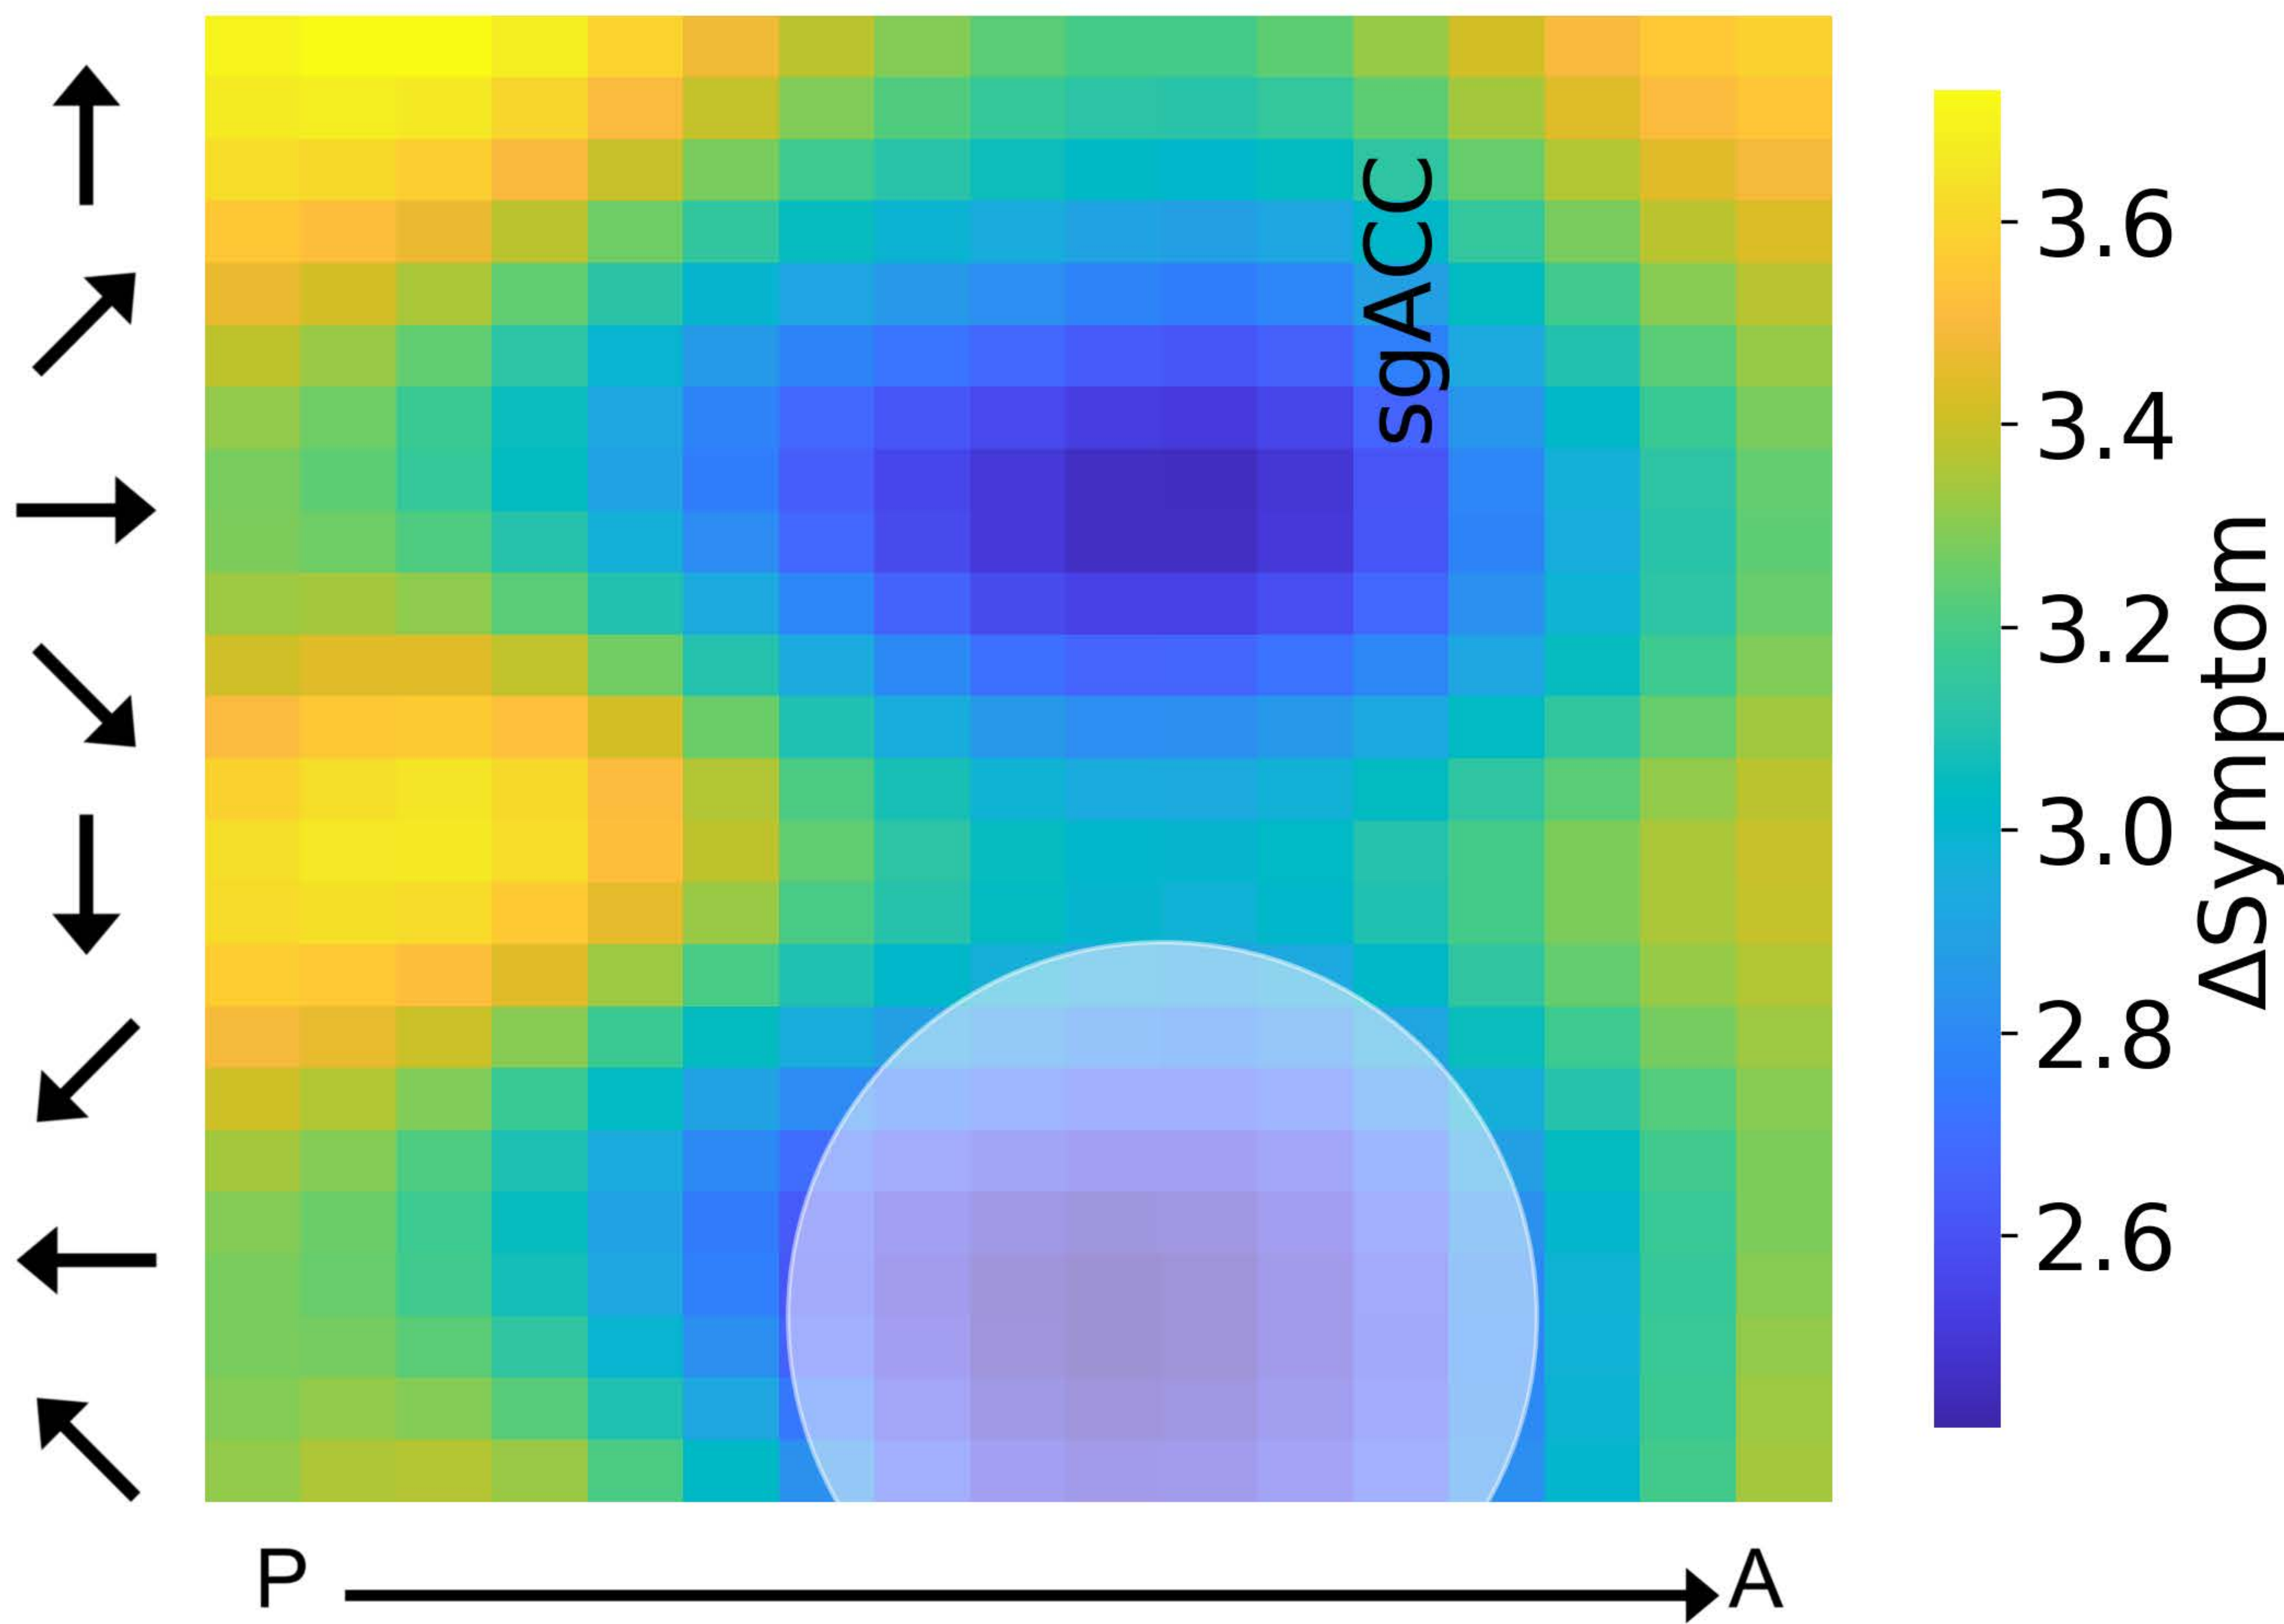



# INDARKV126RTP\_hamd\_right\_dlpfc

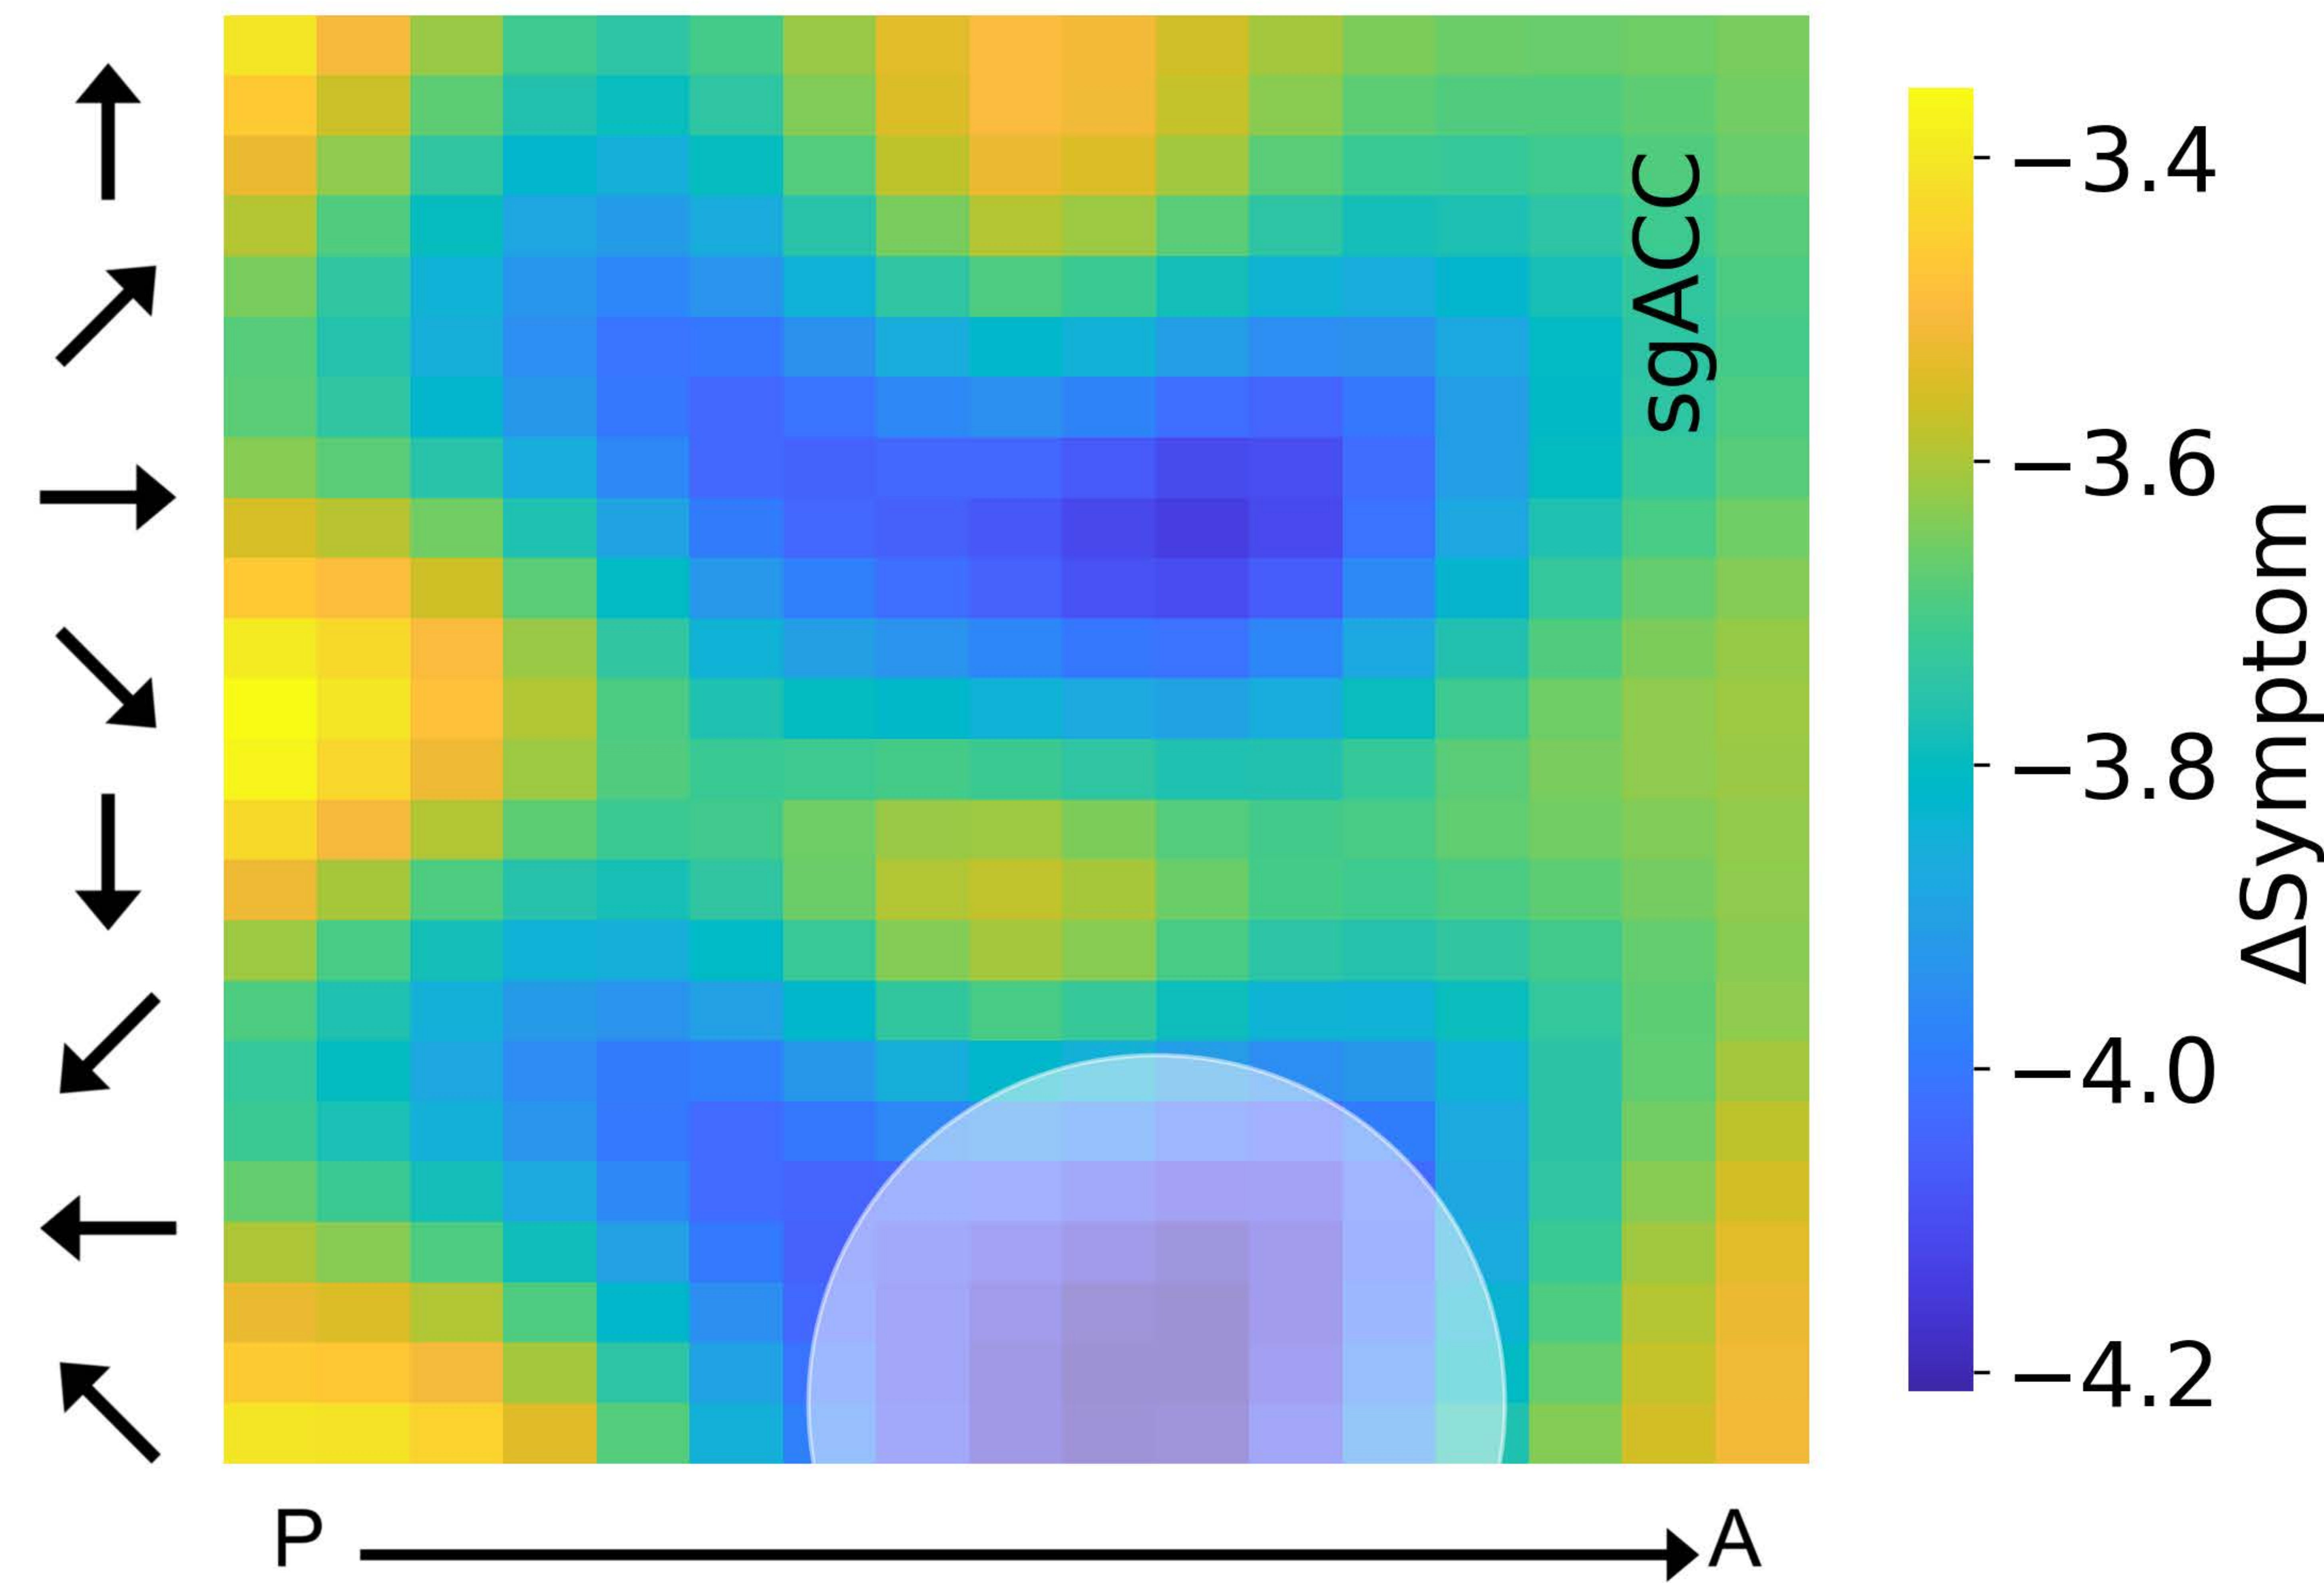



# NDARLF826BAB\_hamd\_right\_dlpfc

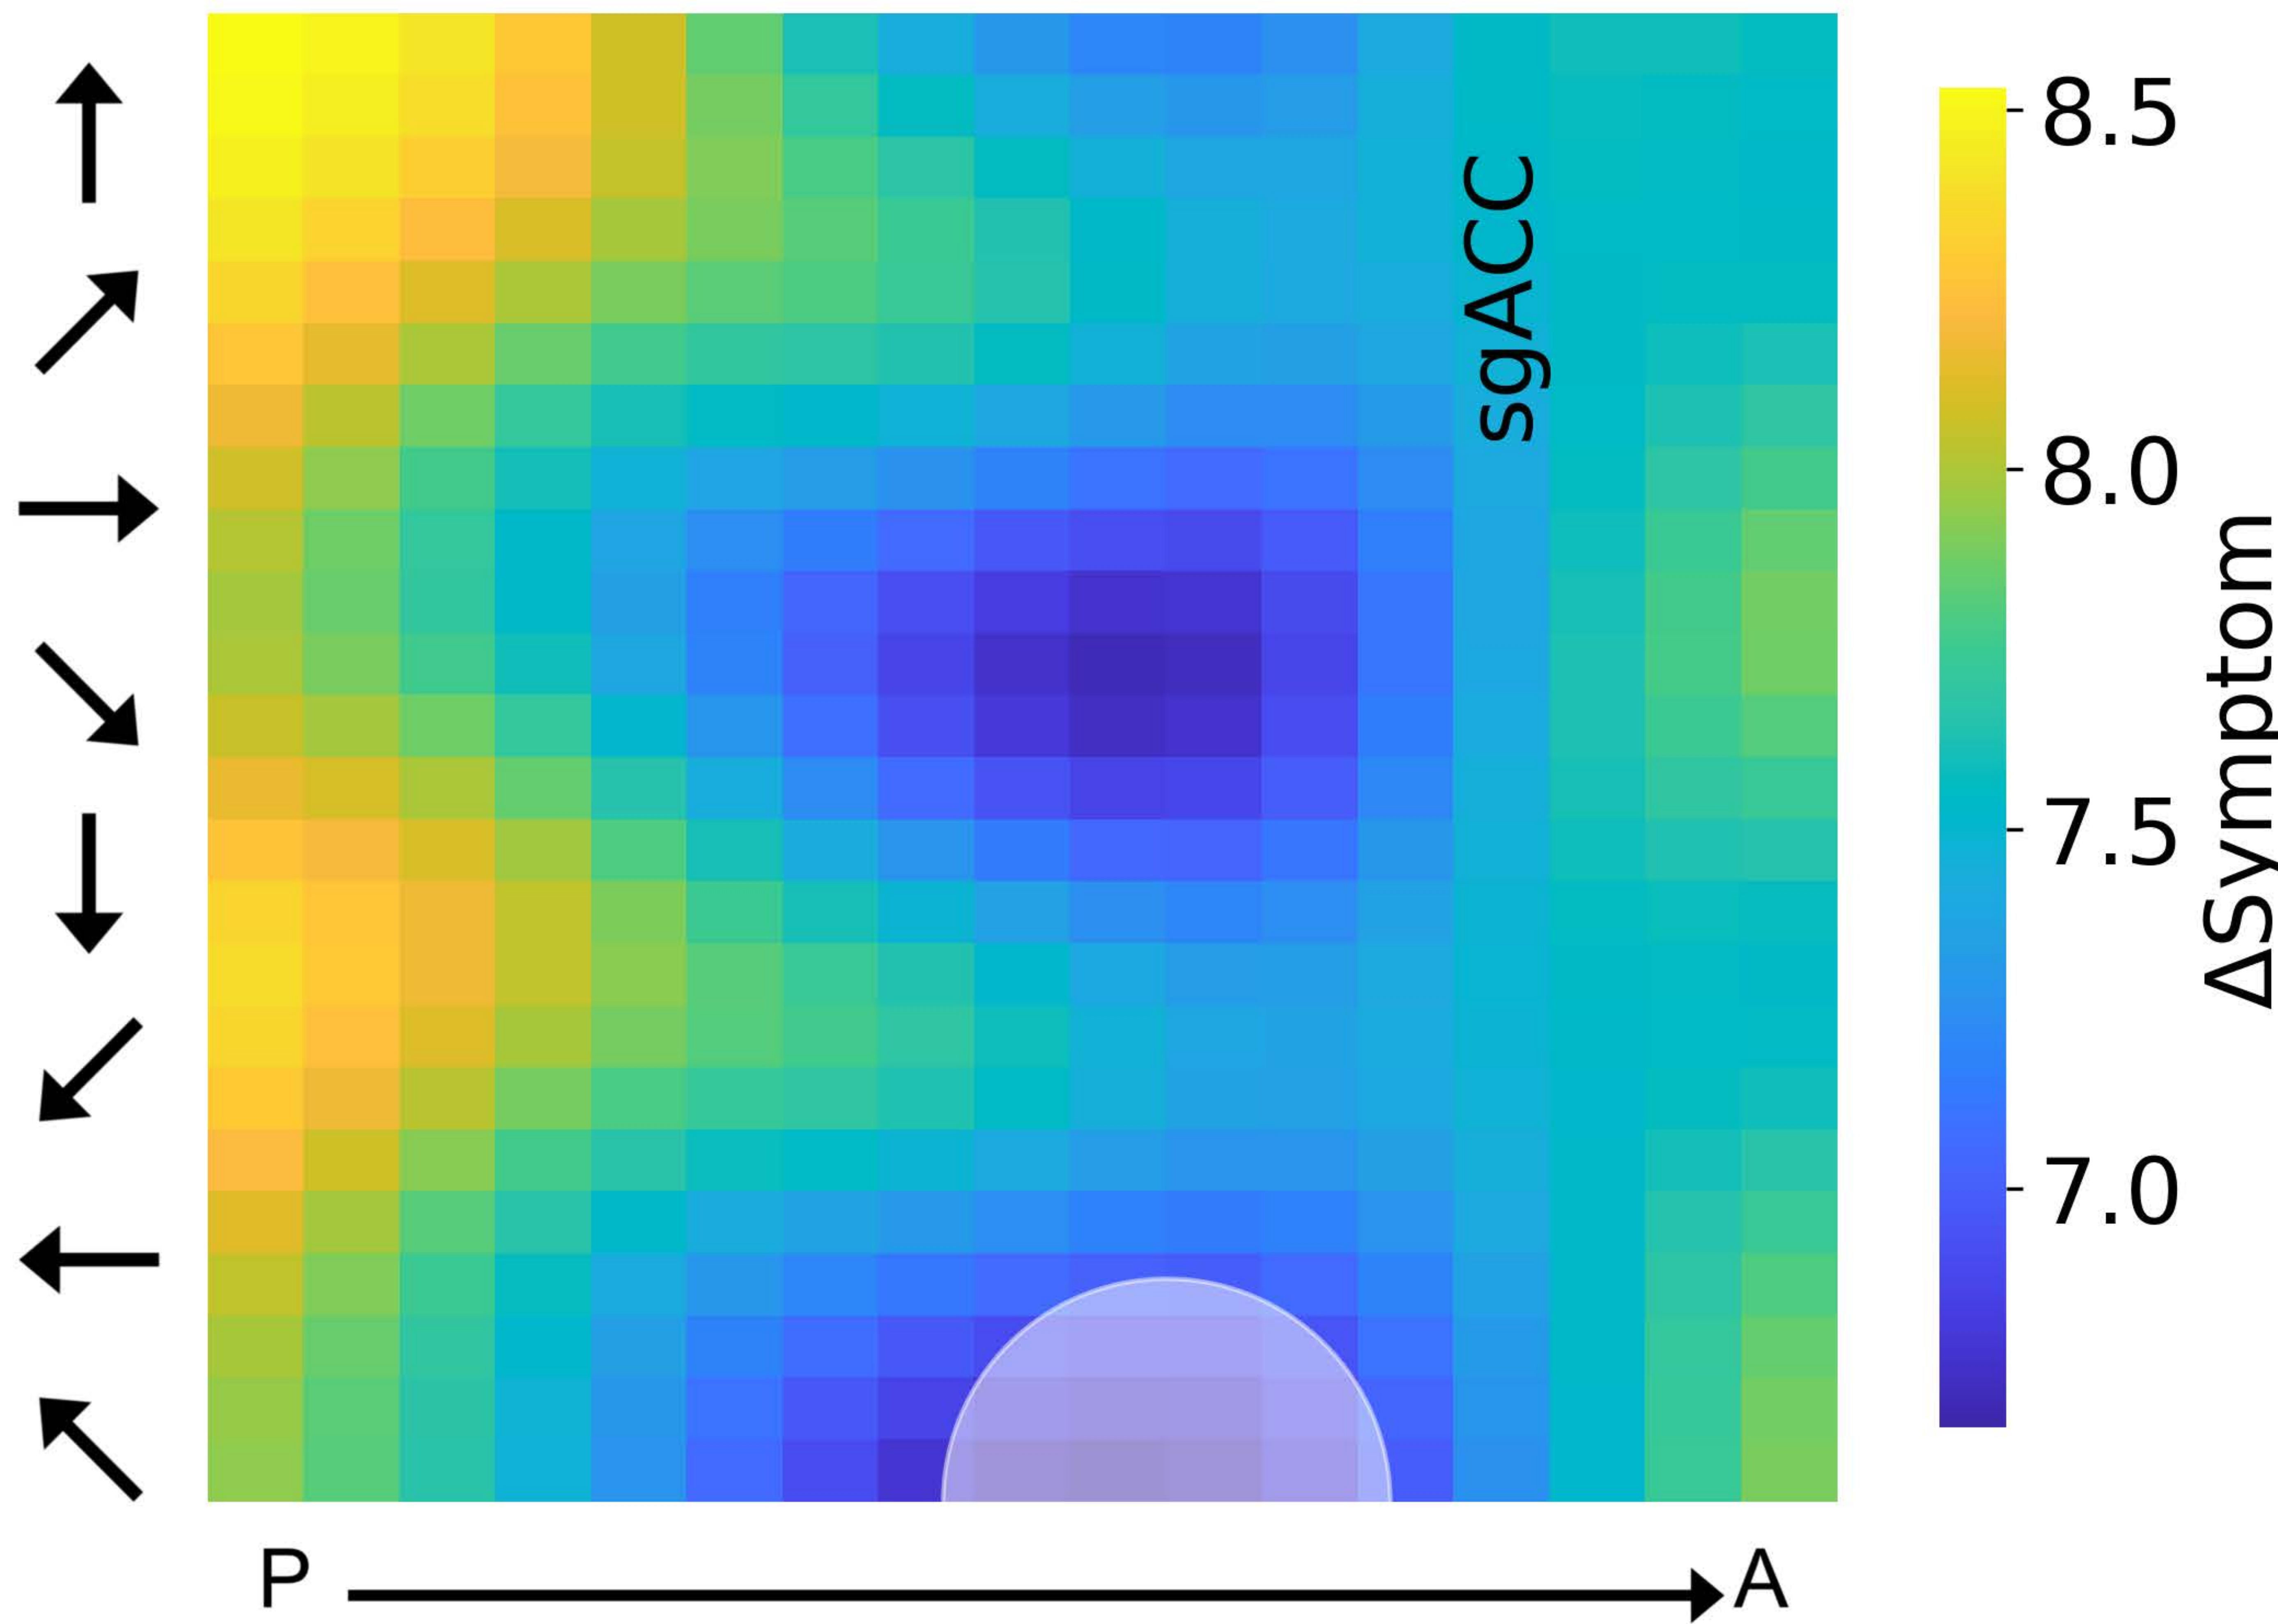



# INDARLM890ELE\_hamd\_right\_dlpfc

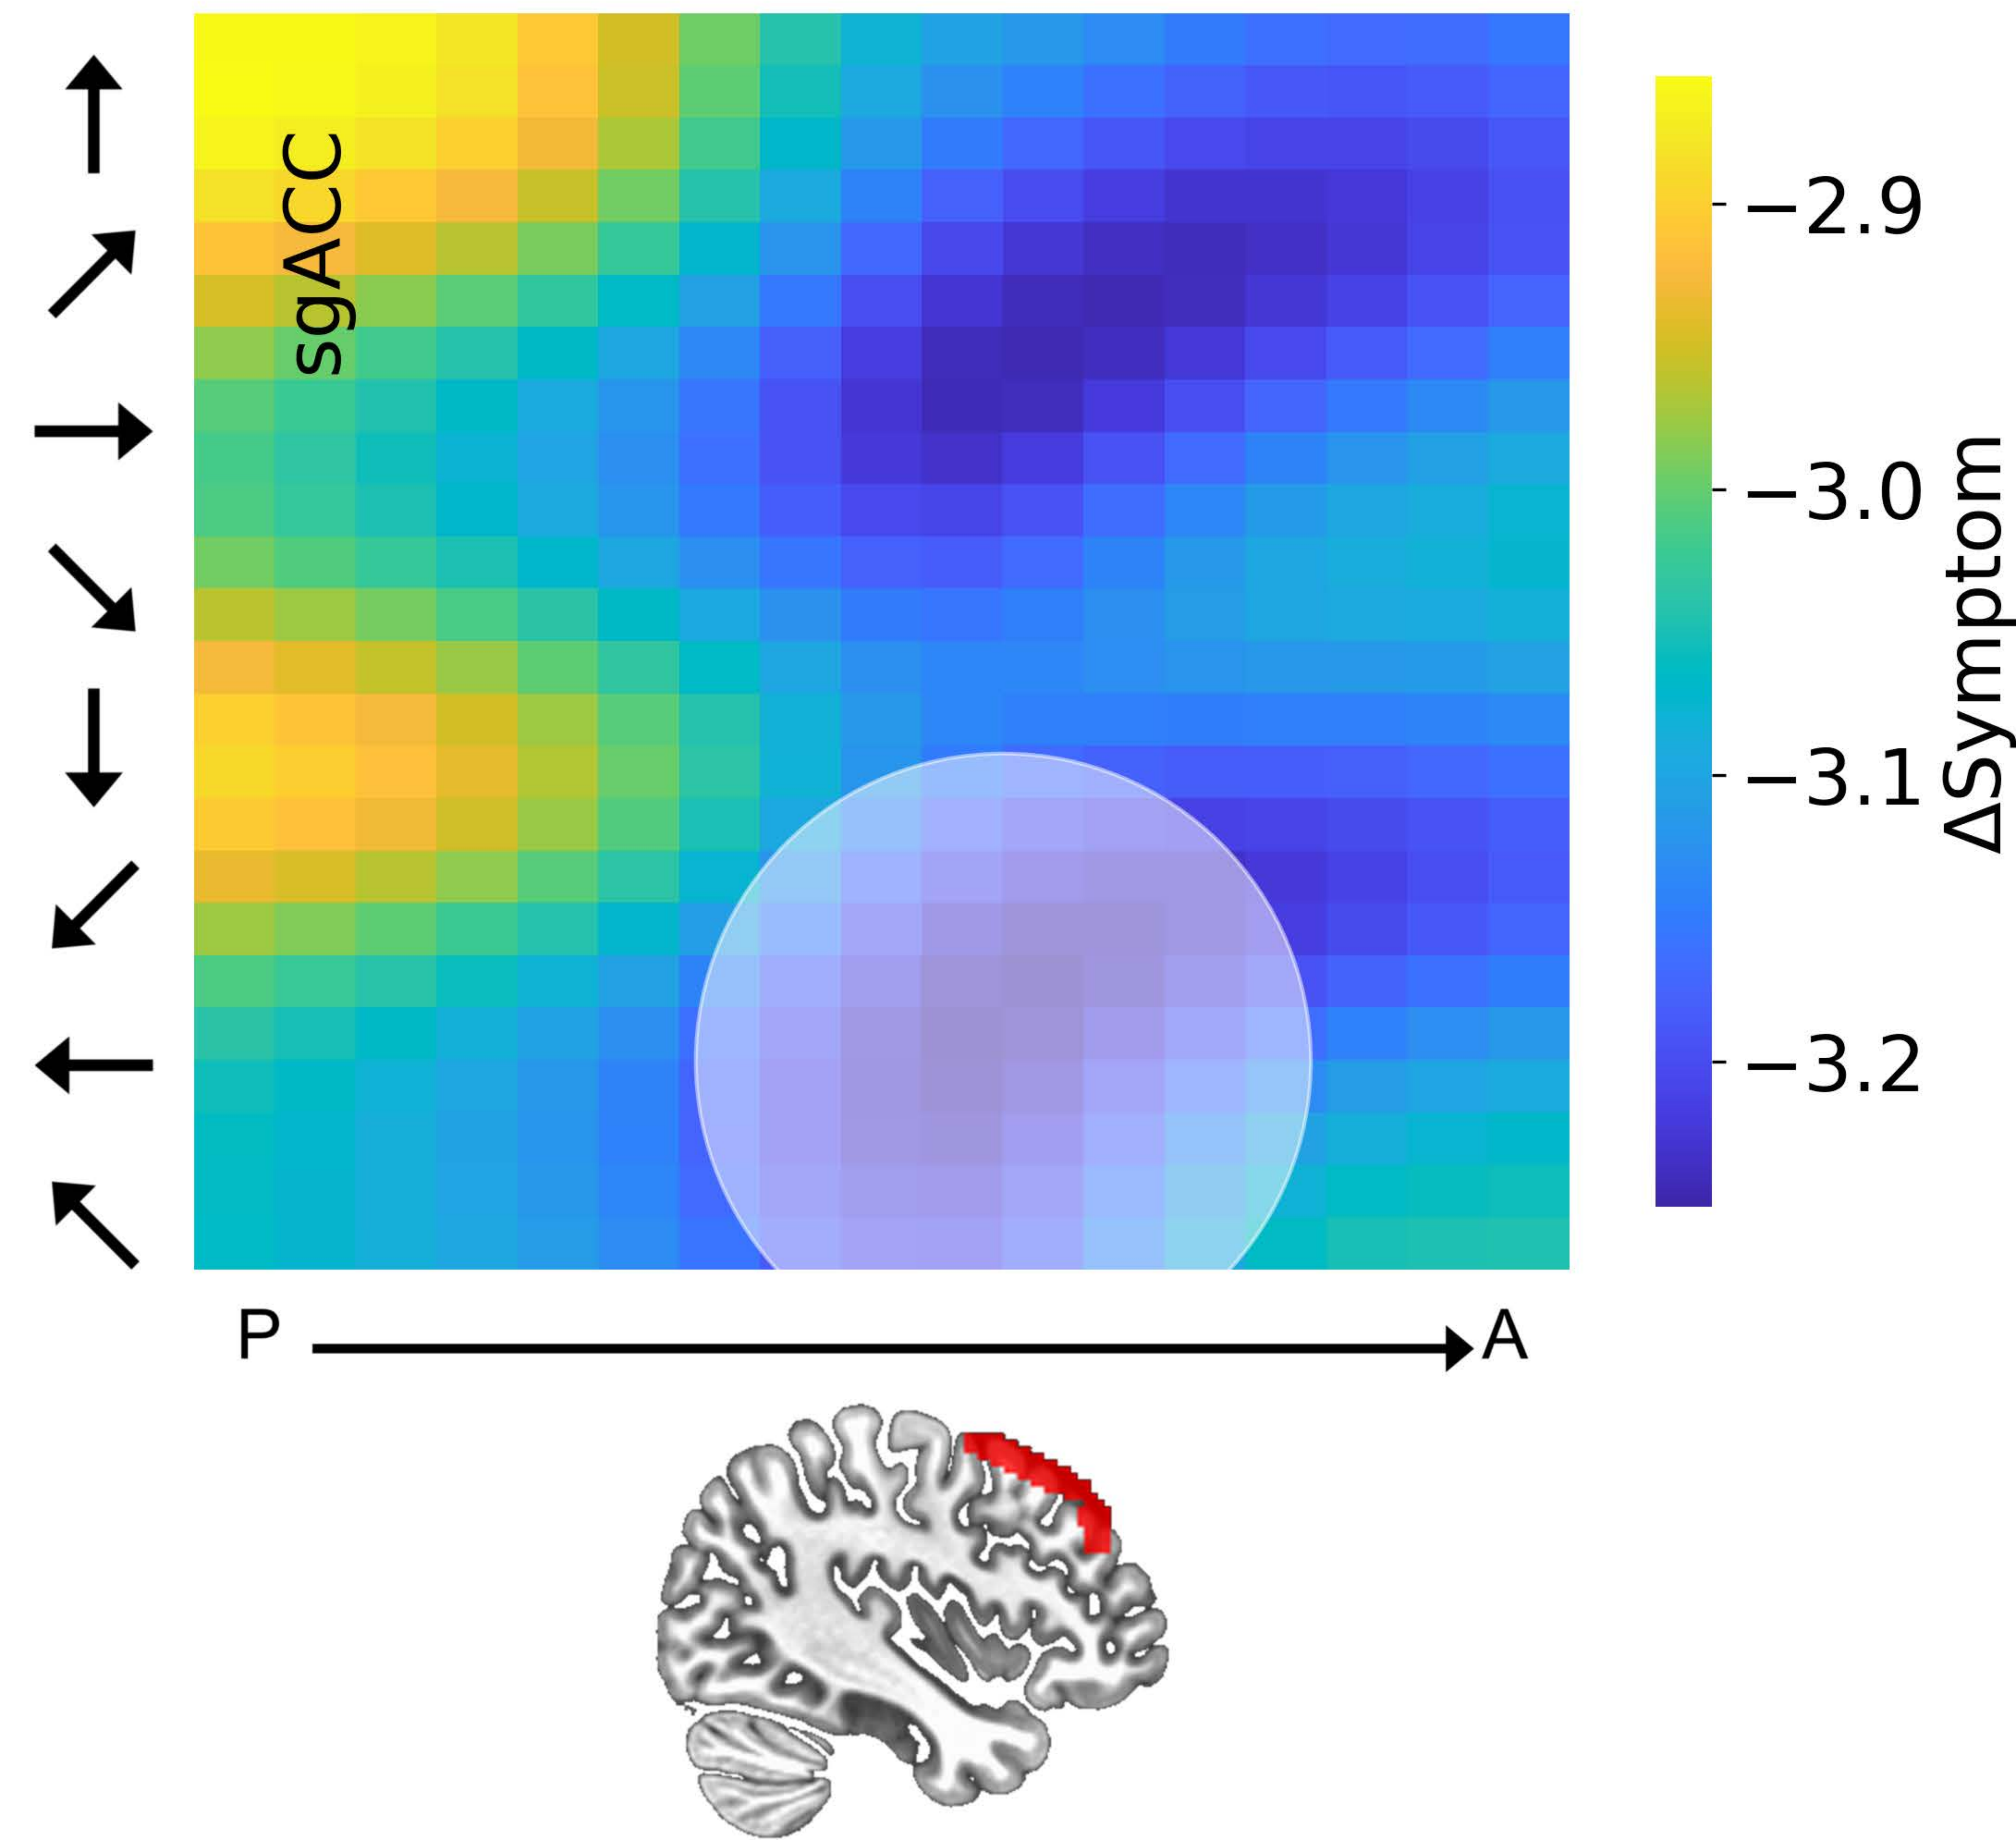



# INDARLZ935EEN\_hamd\_right\_dlpfc

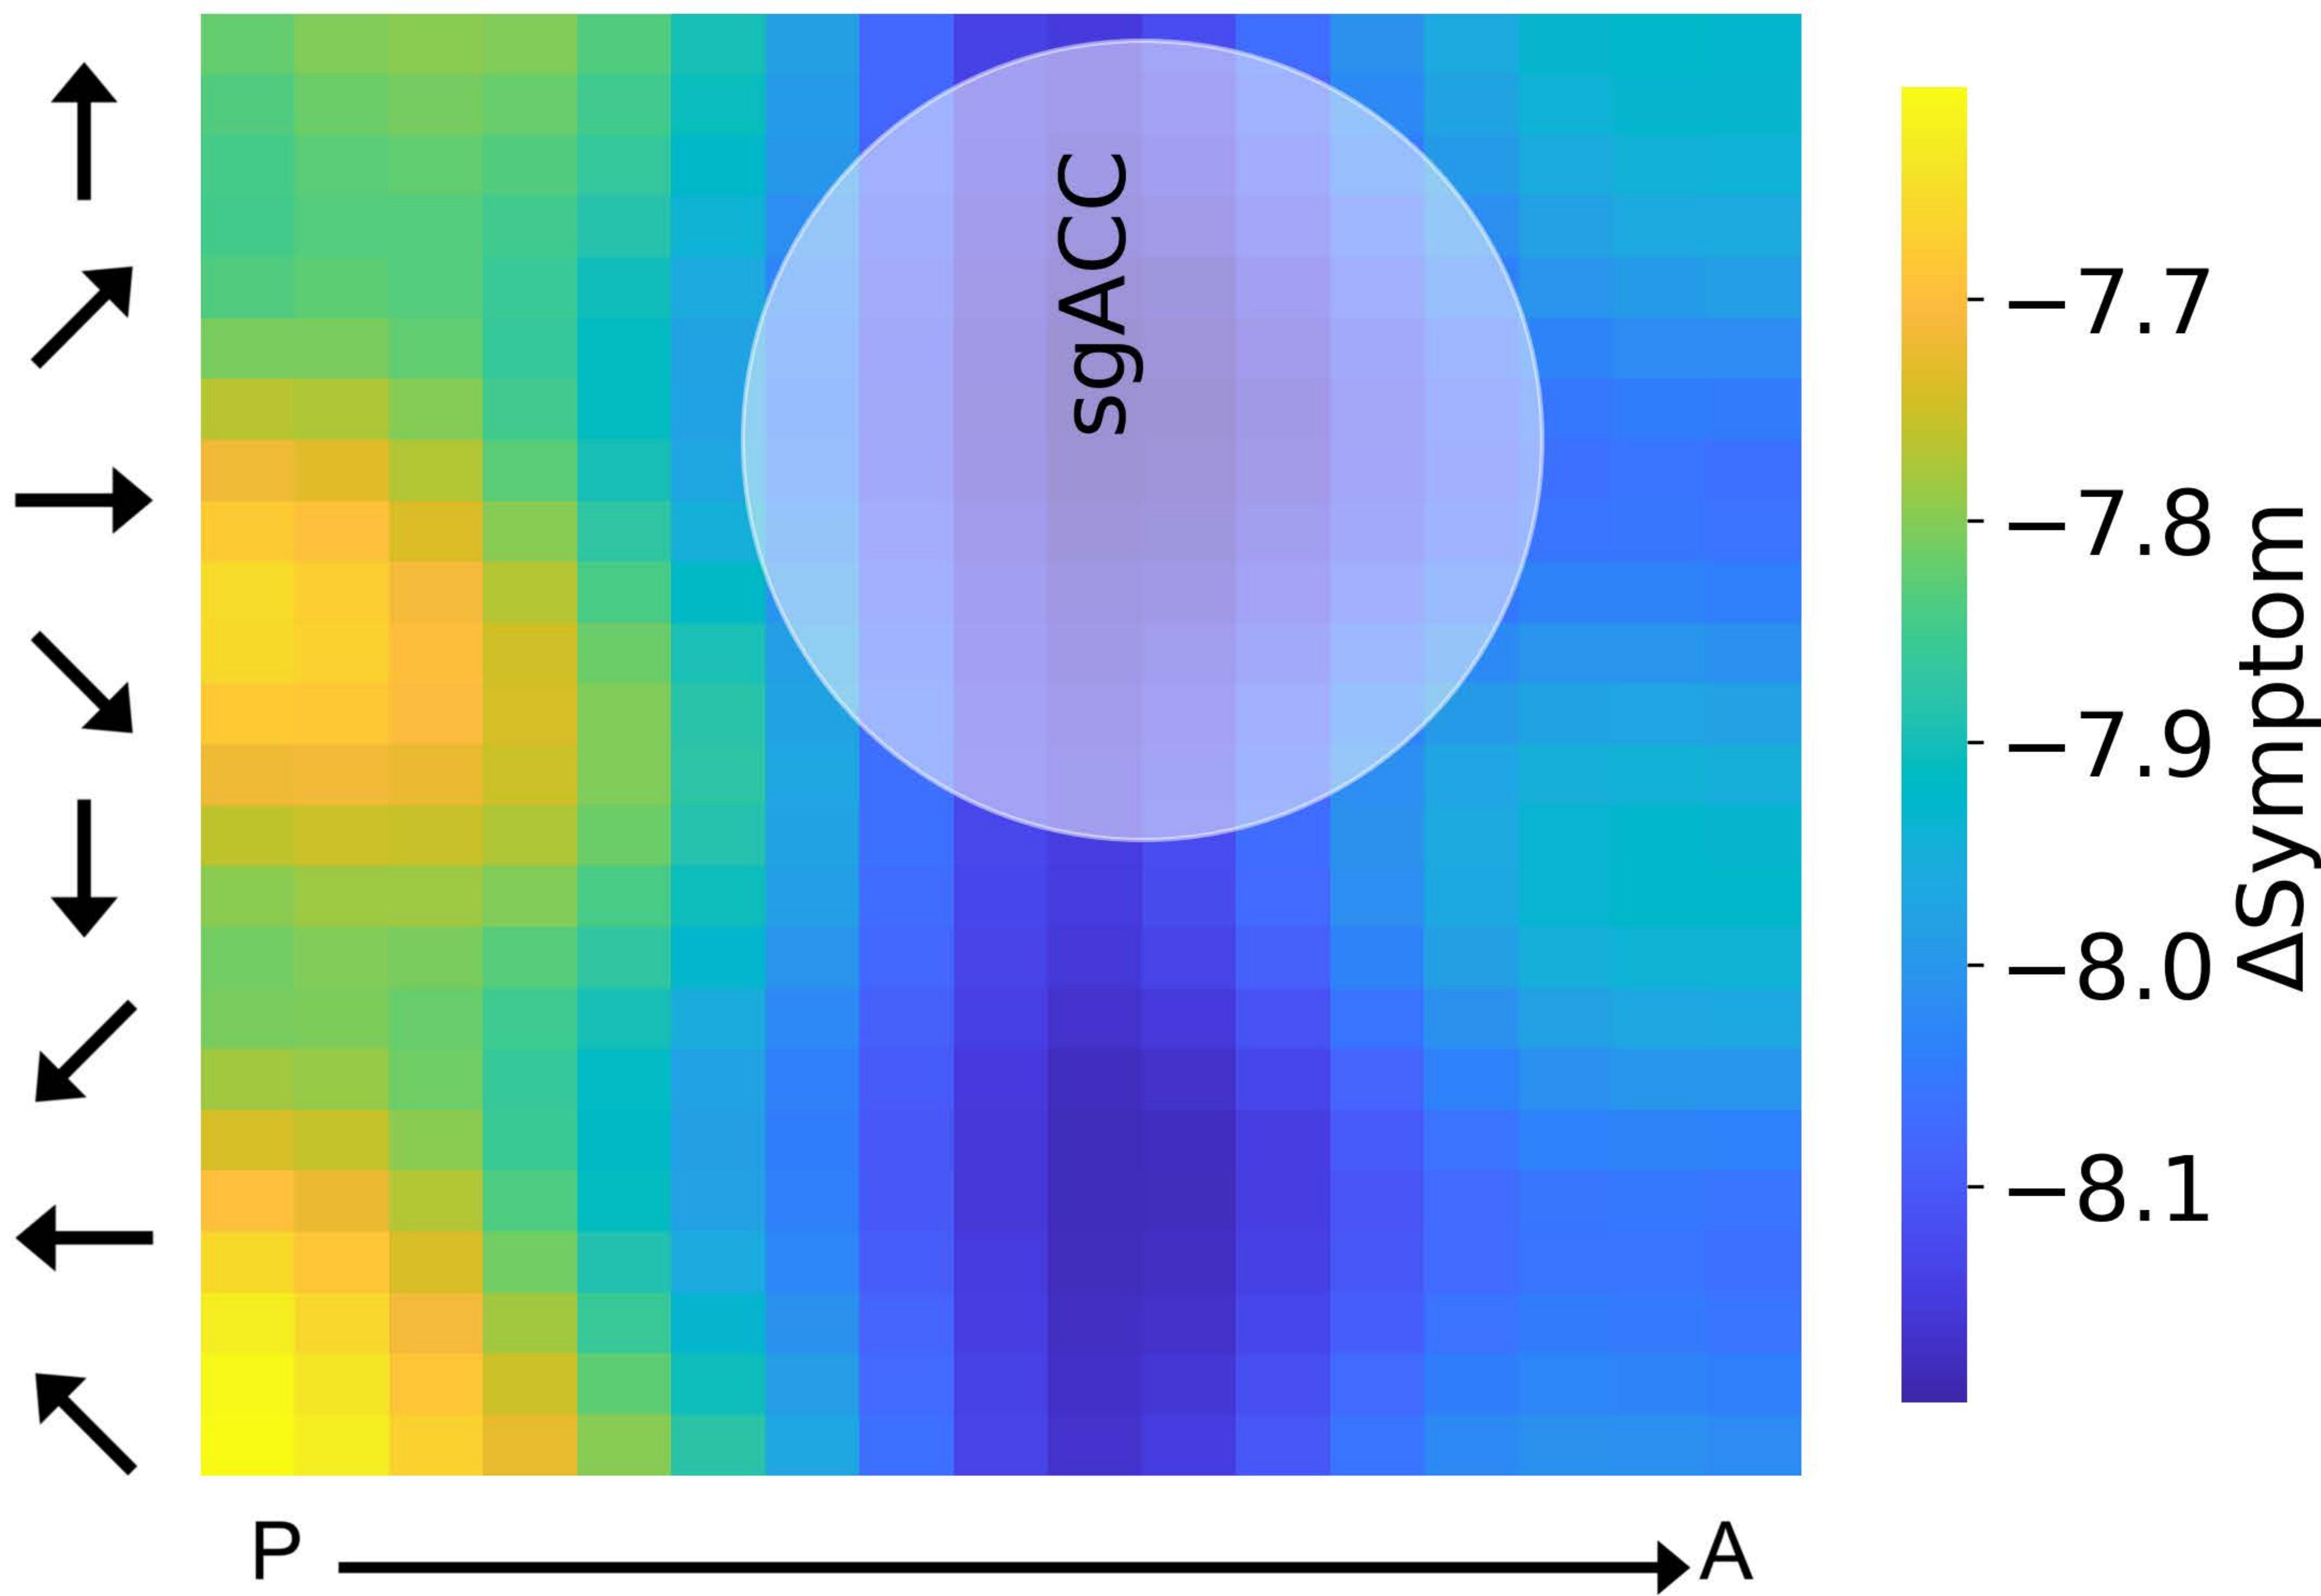



# NDARMA155ATG\_hamd\_right\_dlpfc

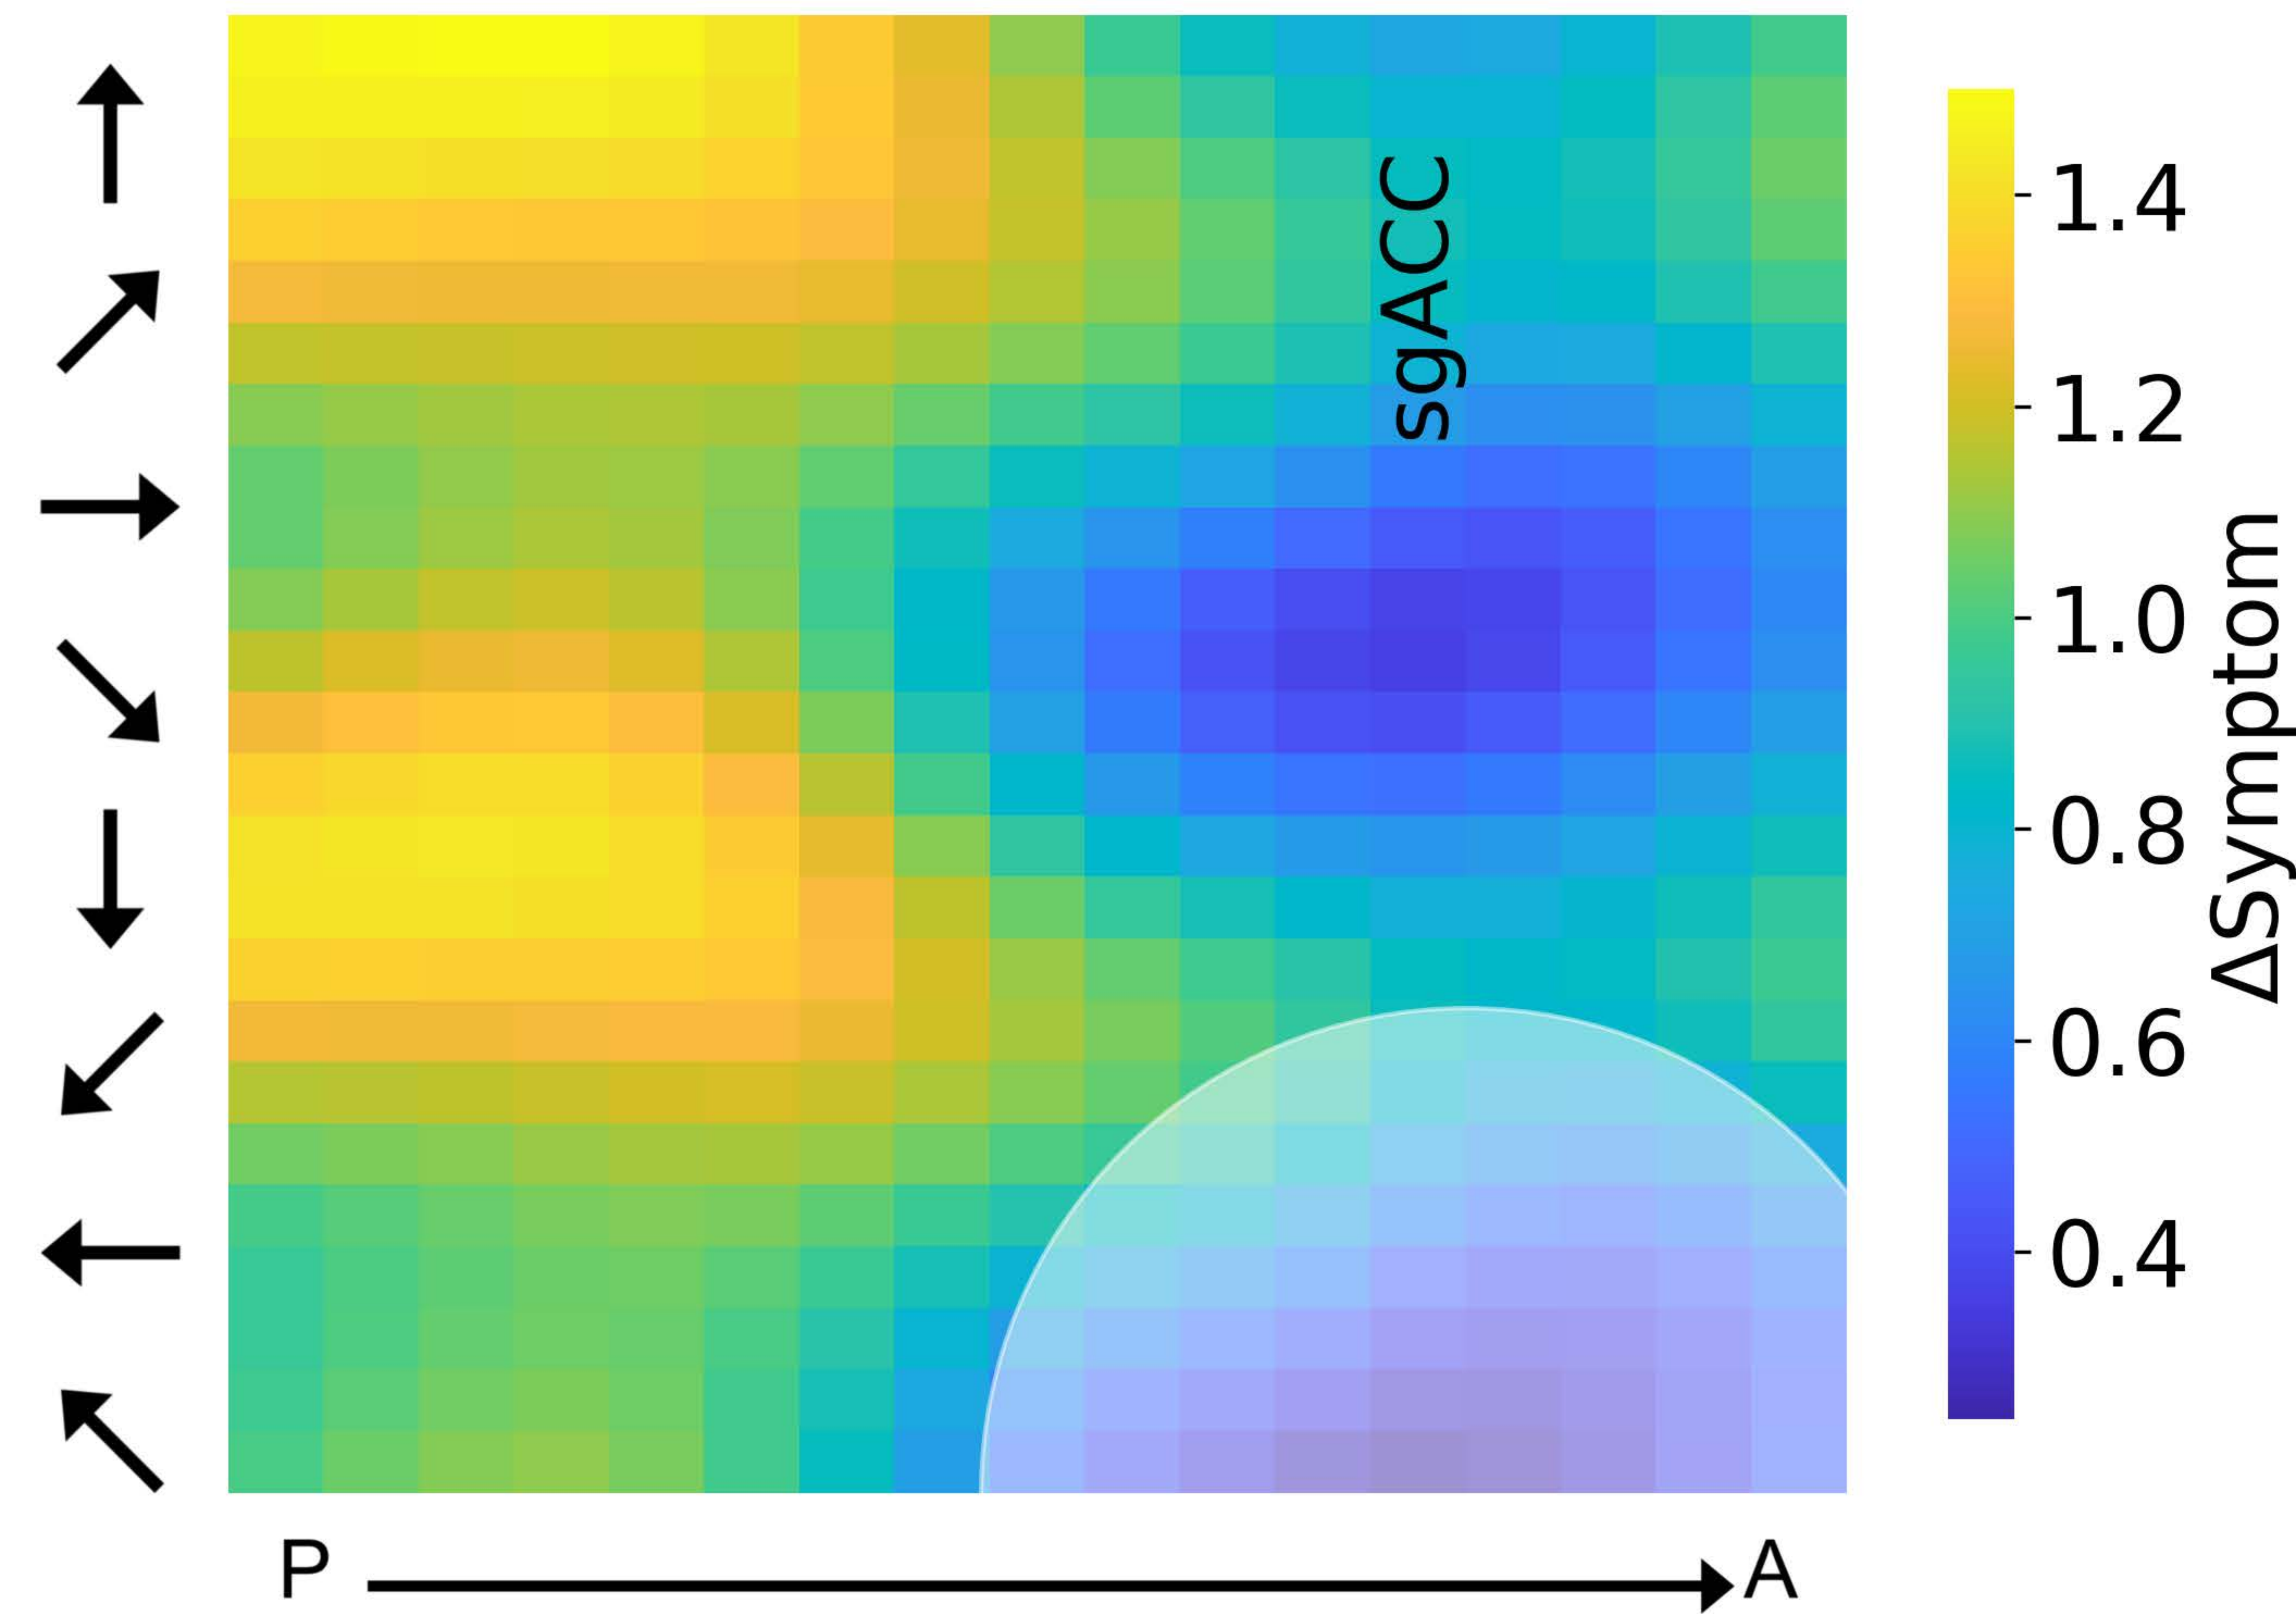



# NDARMB943VPJ\_hamd\_right\_dlpfc

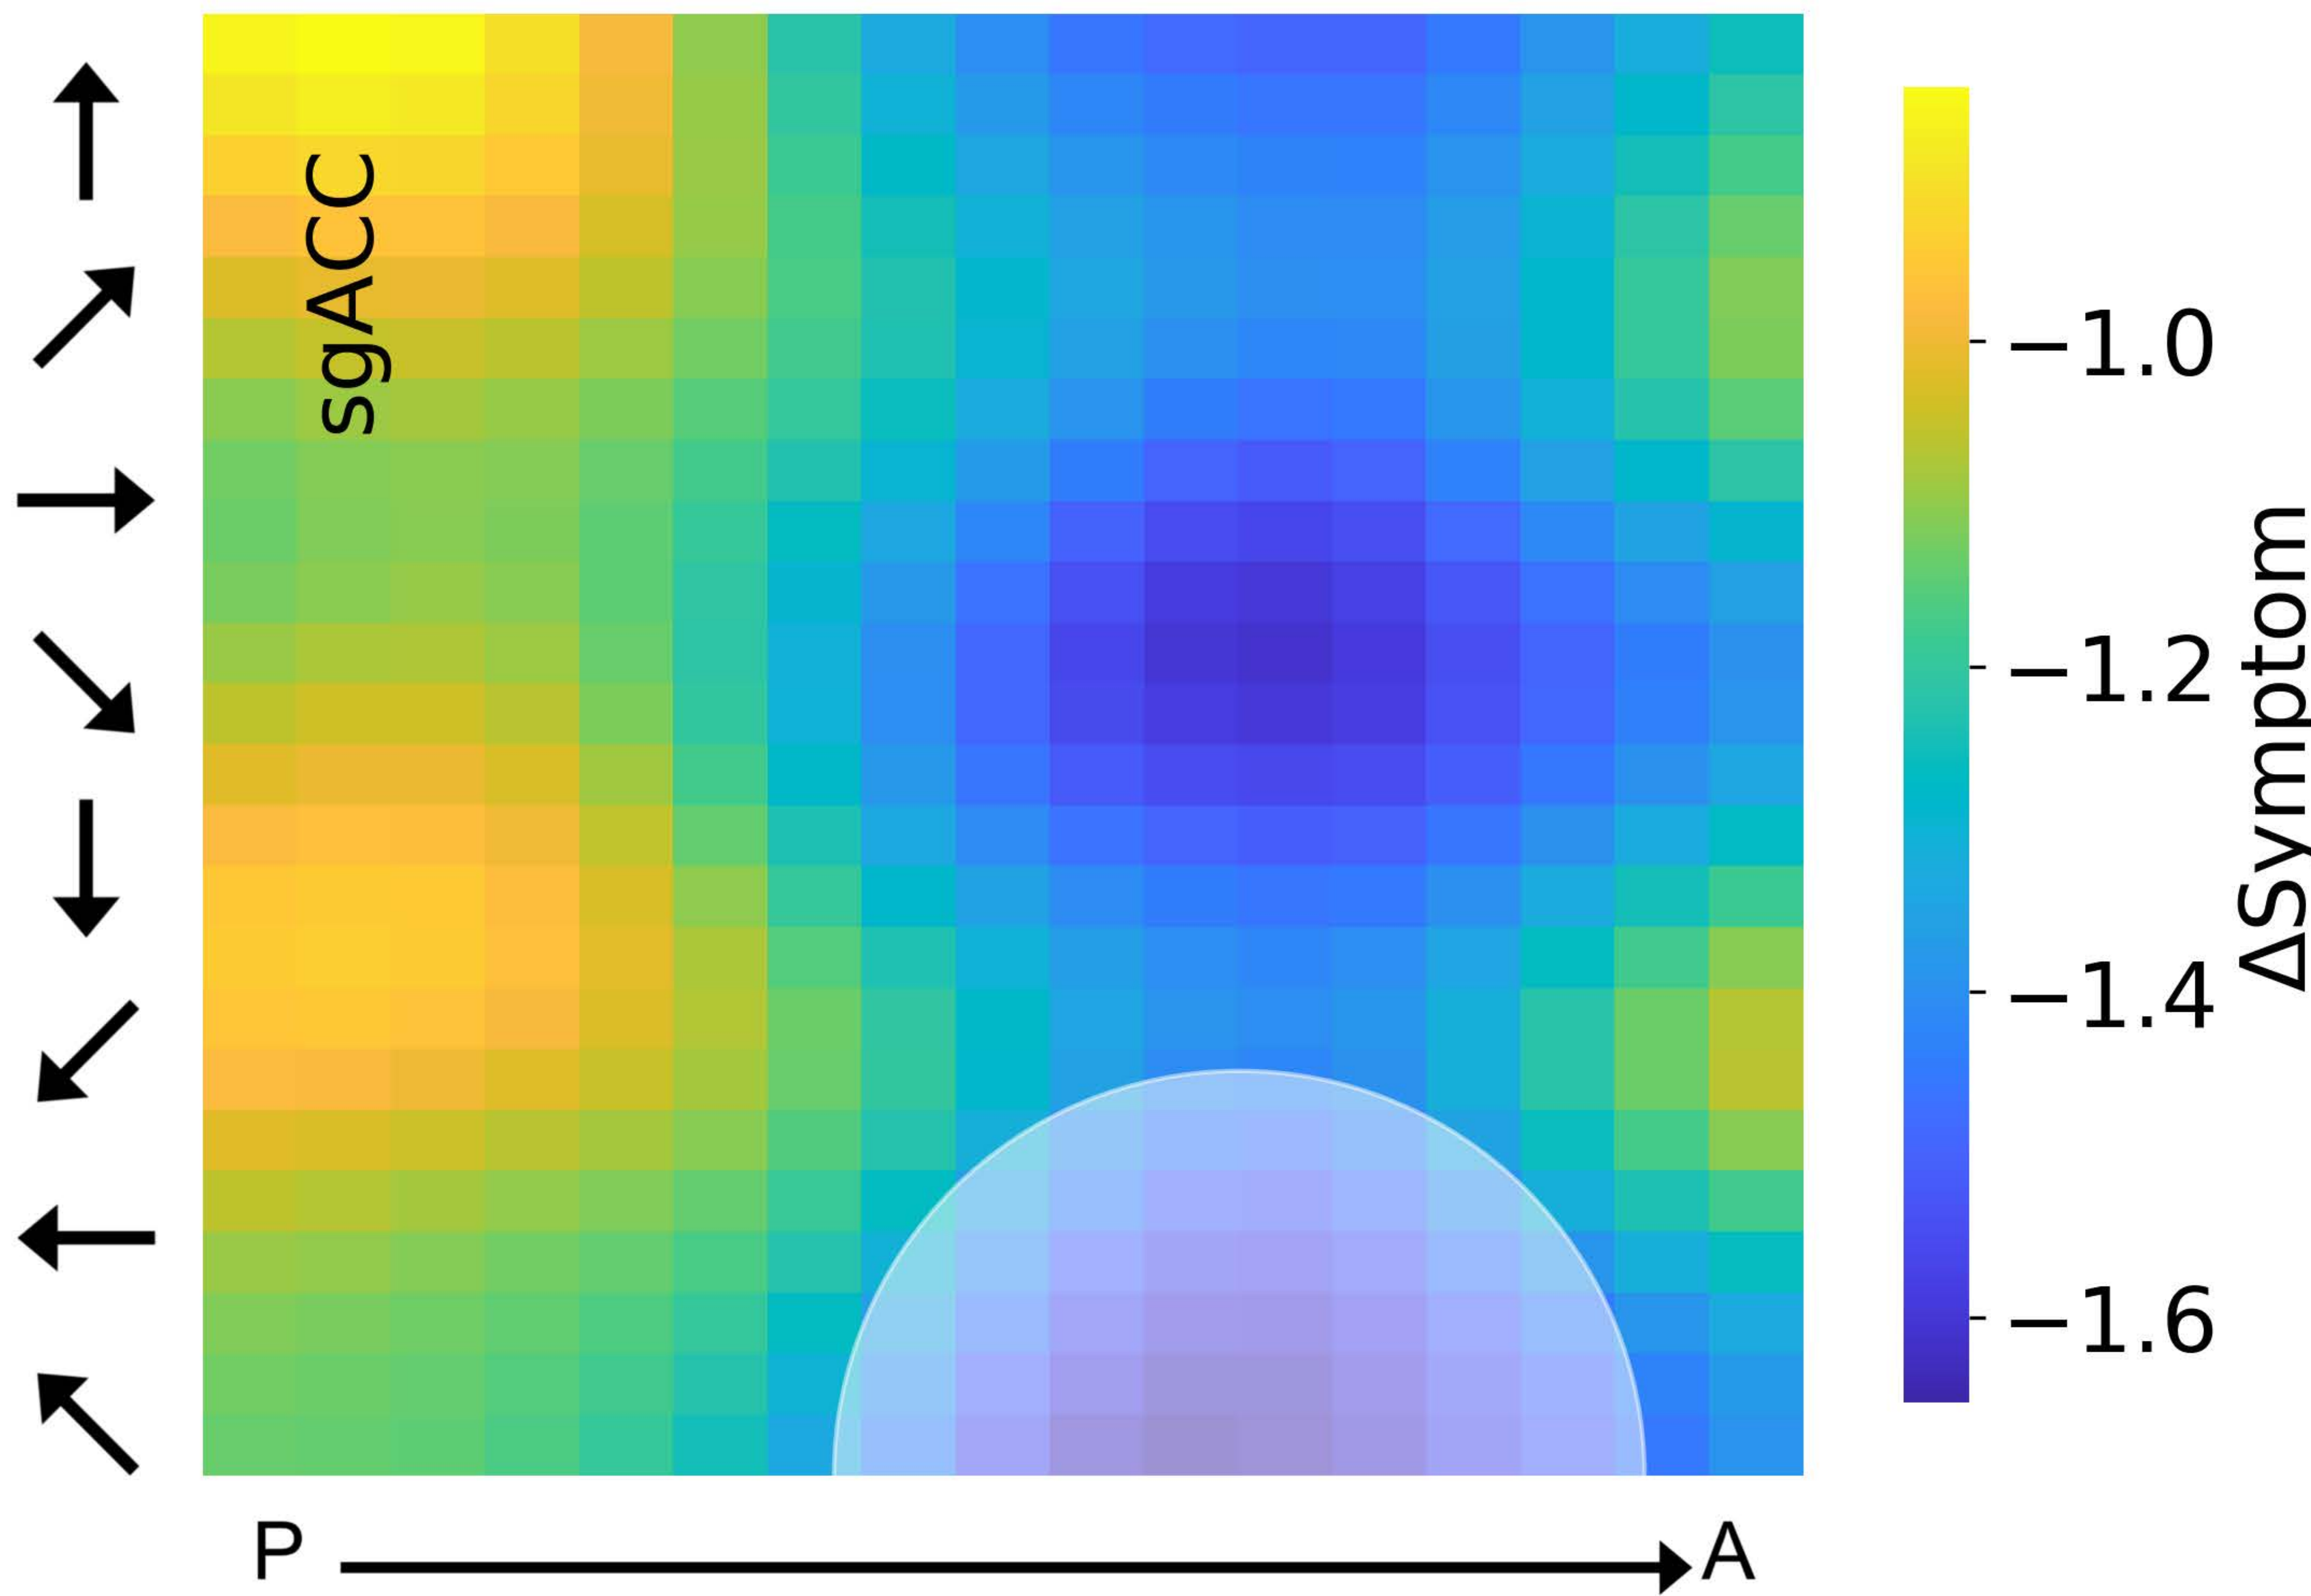



# NDARM016CB8\_hamd\_right\_dlpfc

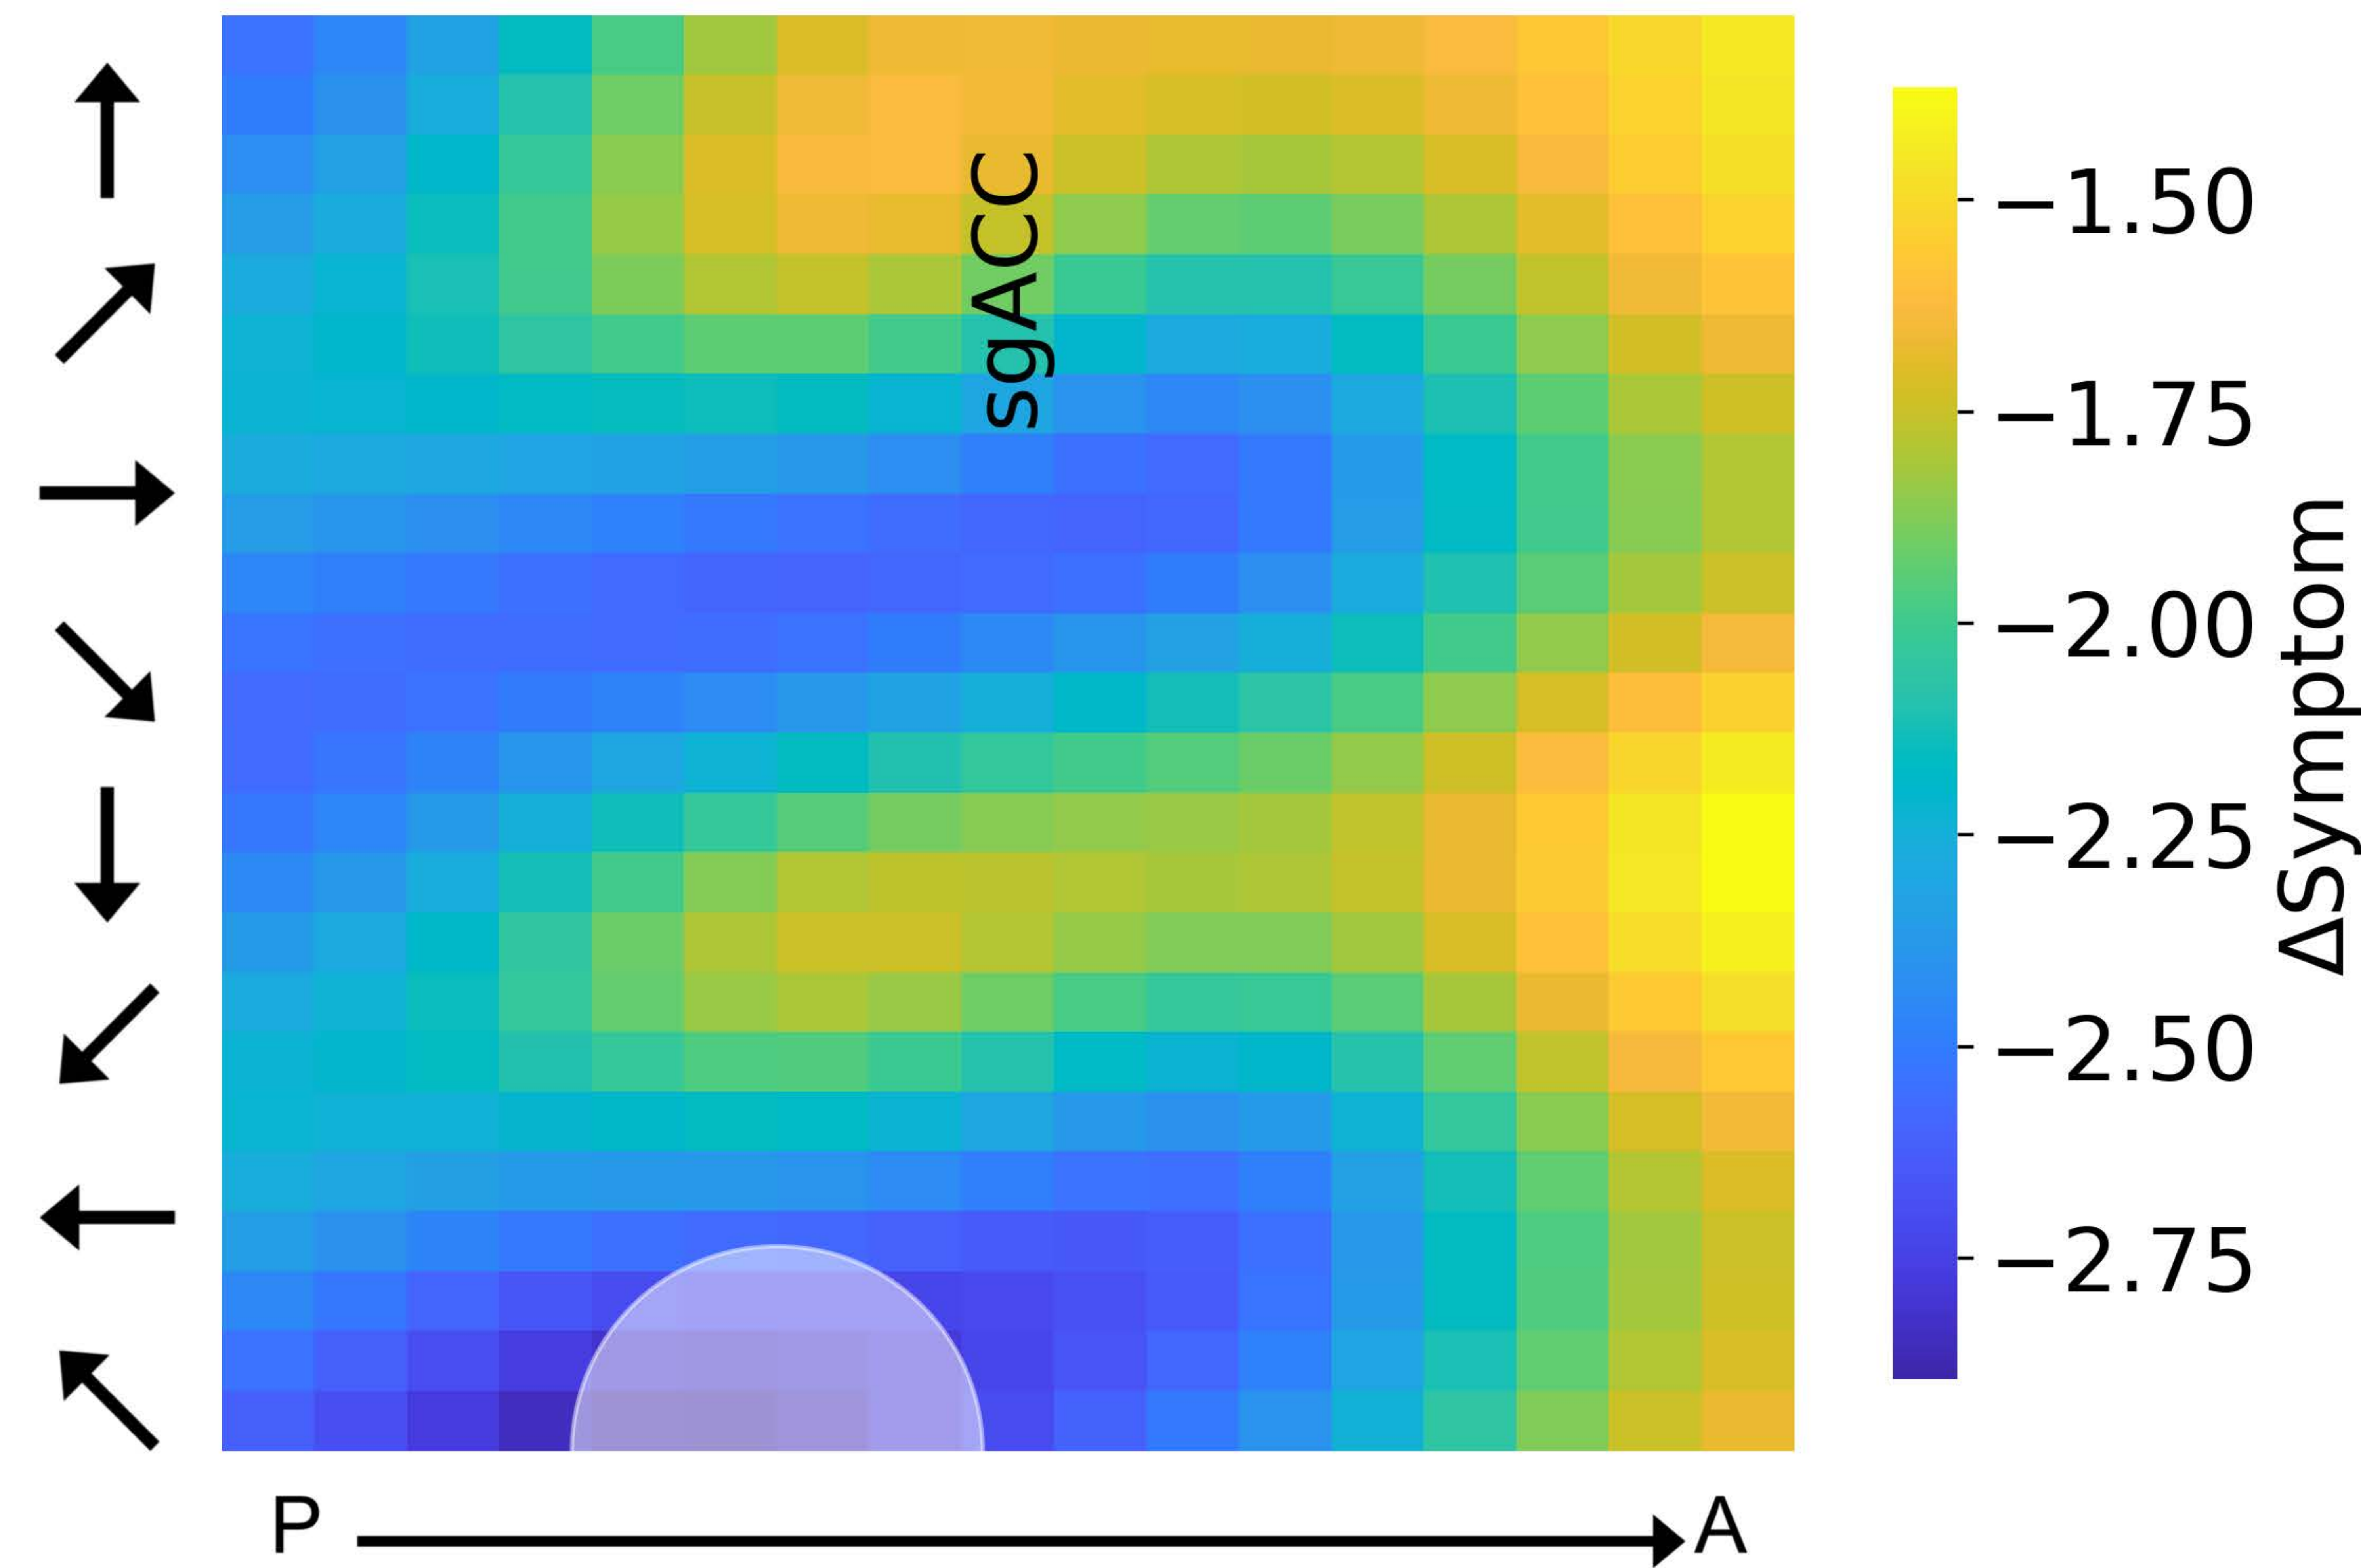



# NDARMD601CTU\_hamd\_right\_dlpfc

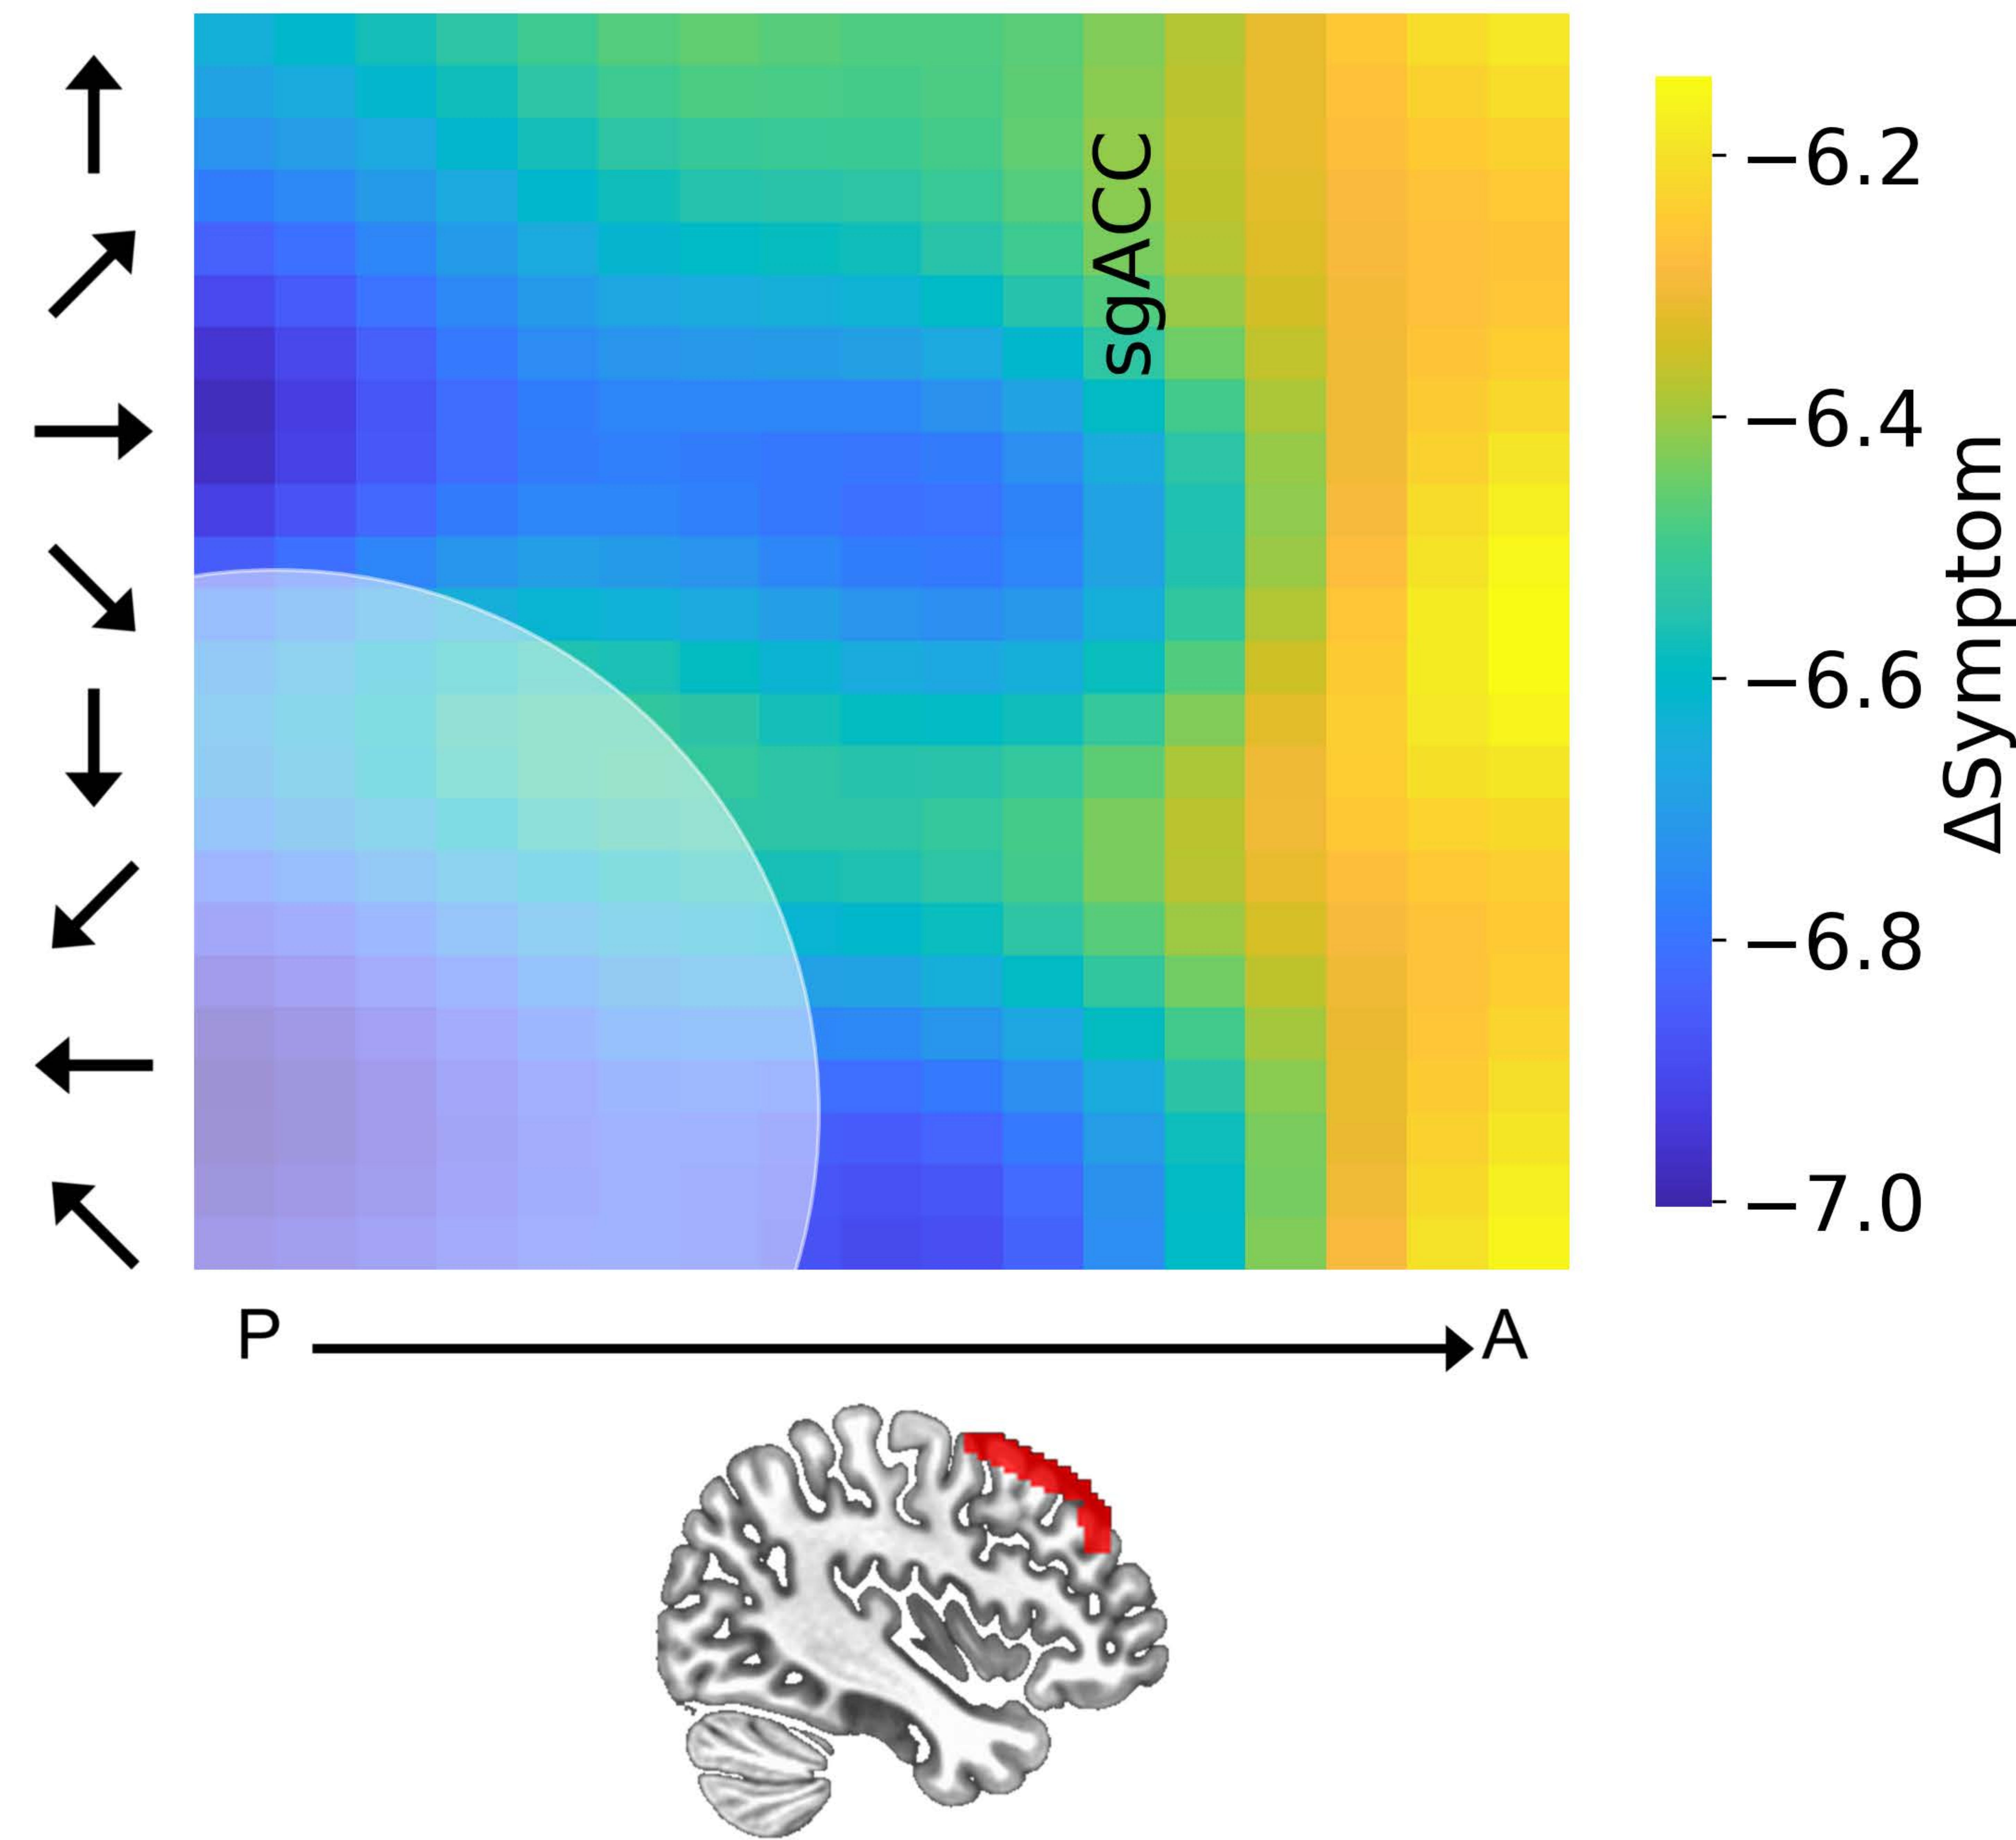



# INDARME189AXP\_hamd\_right\_dlpfc

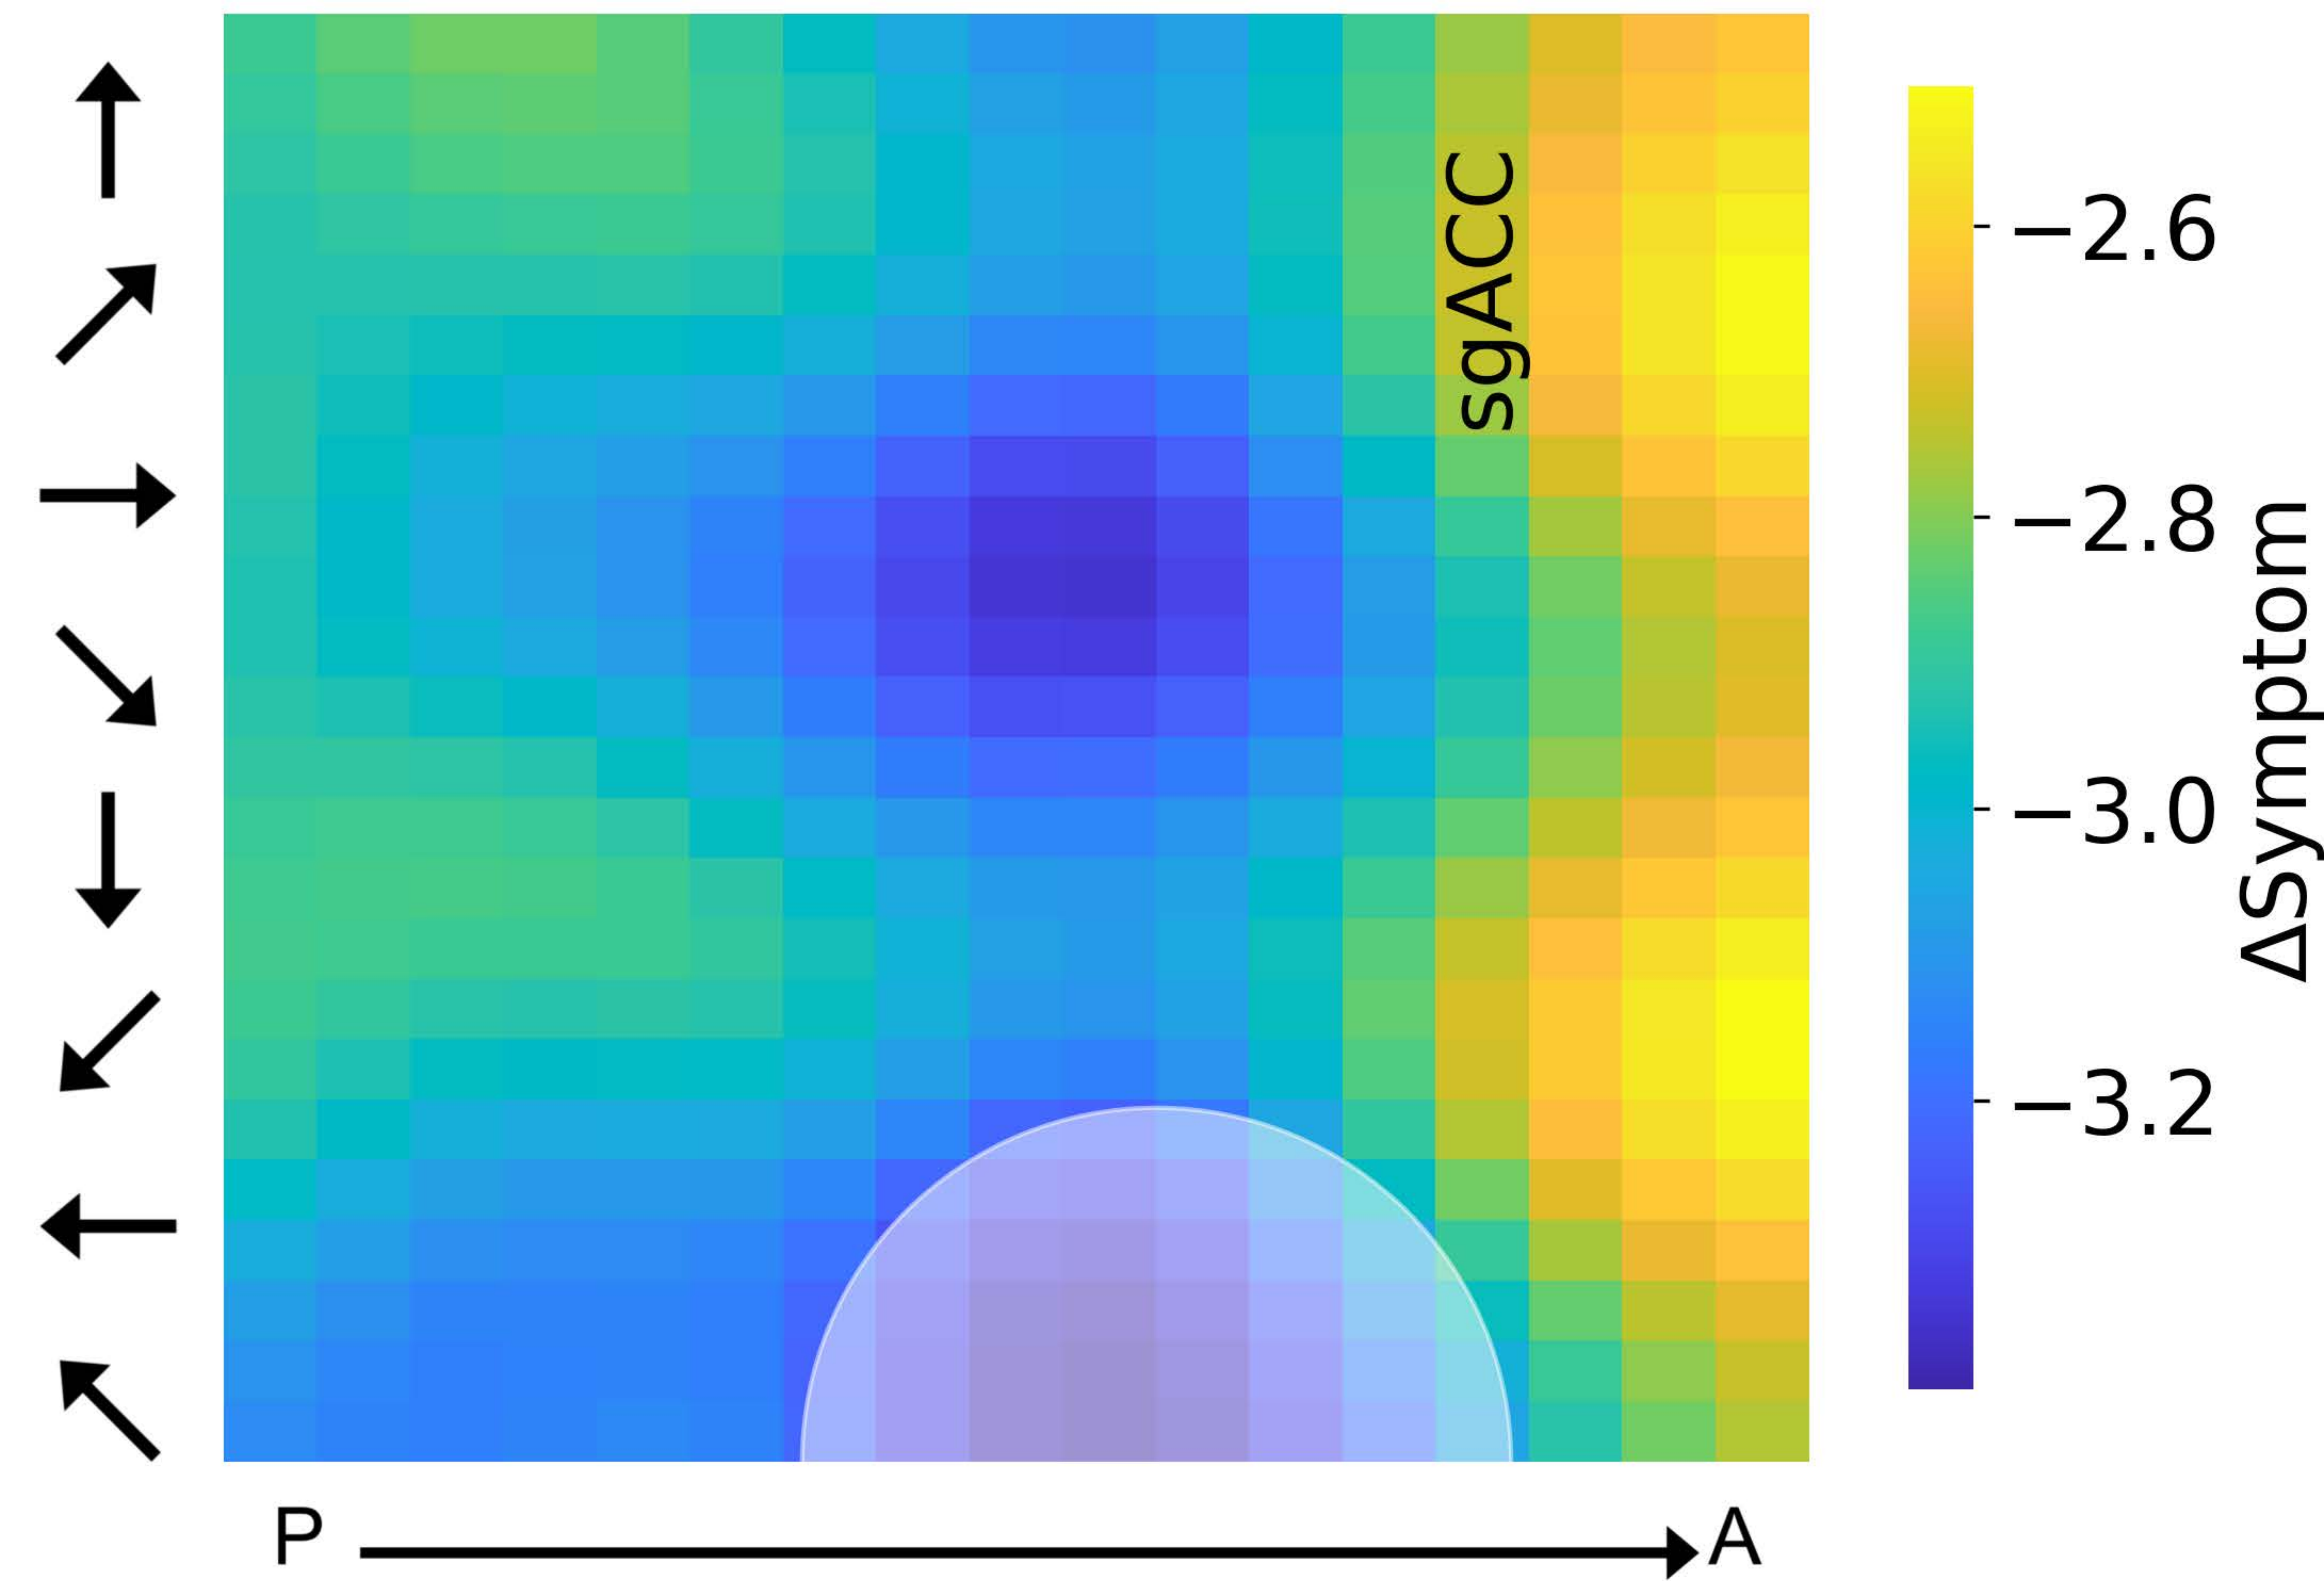



# NDARME335LZJ\_hamd\_right\_dlpfc

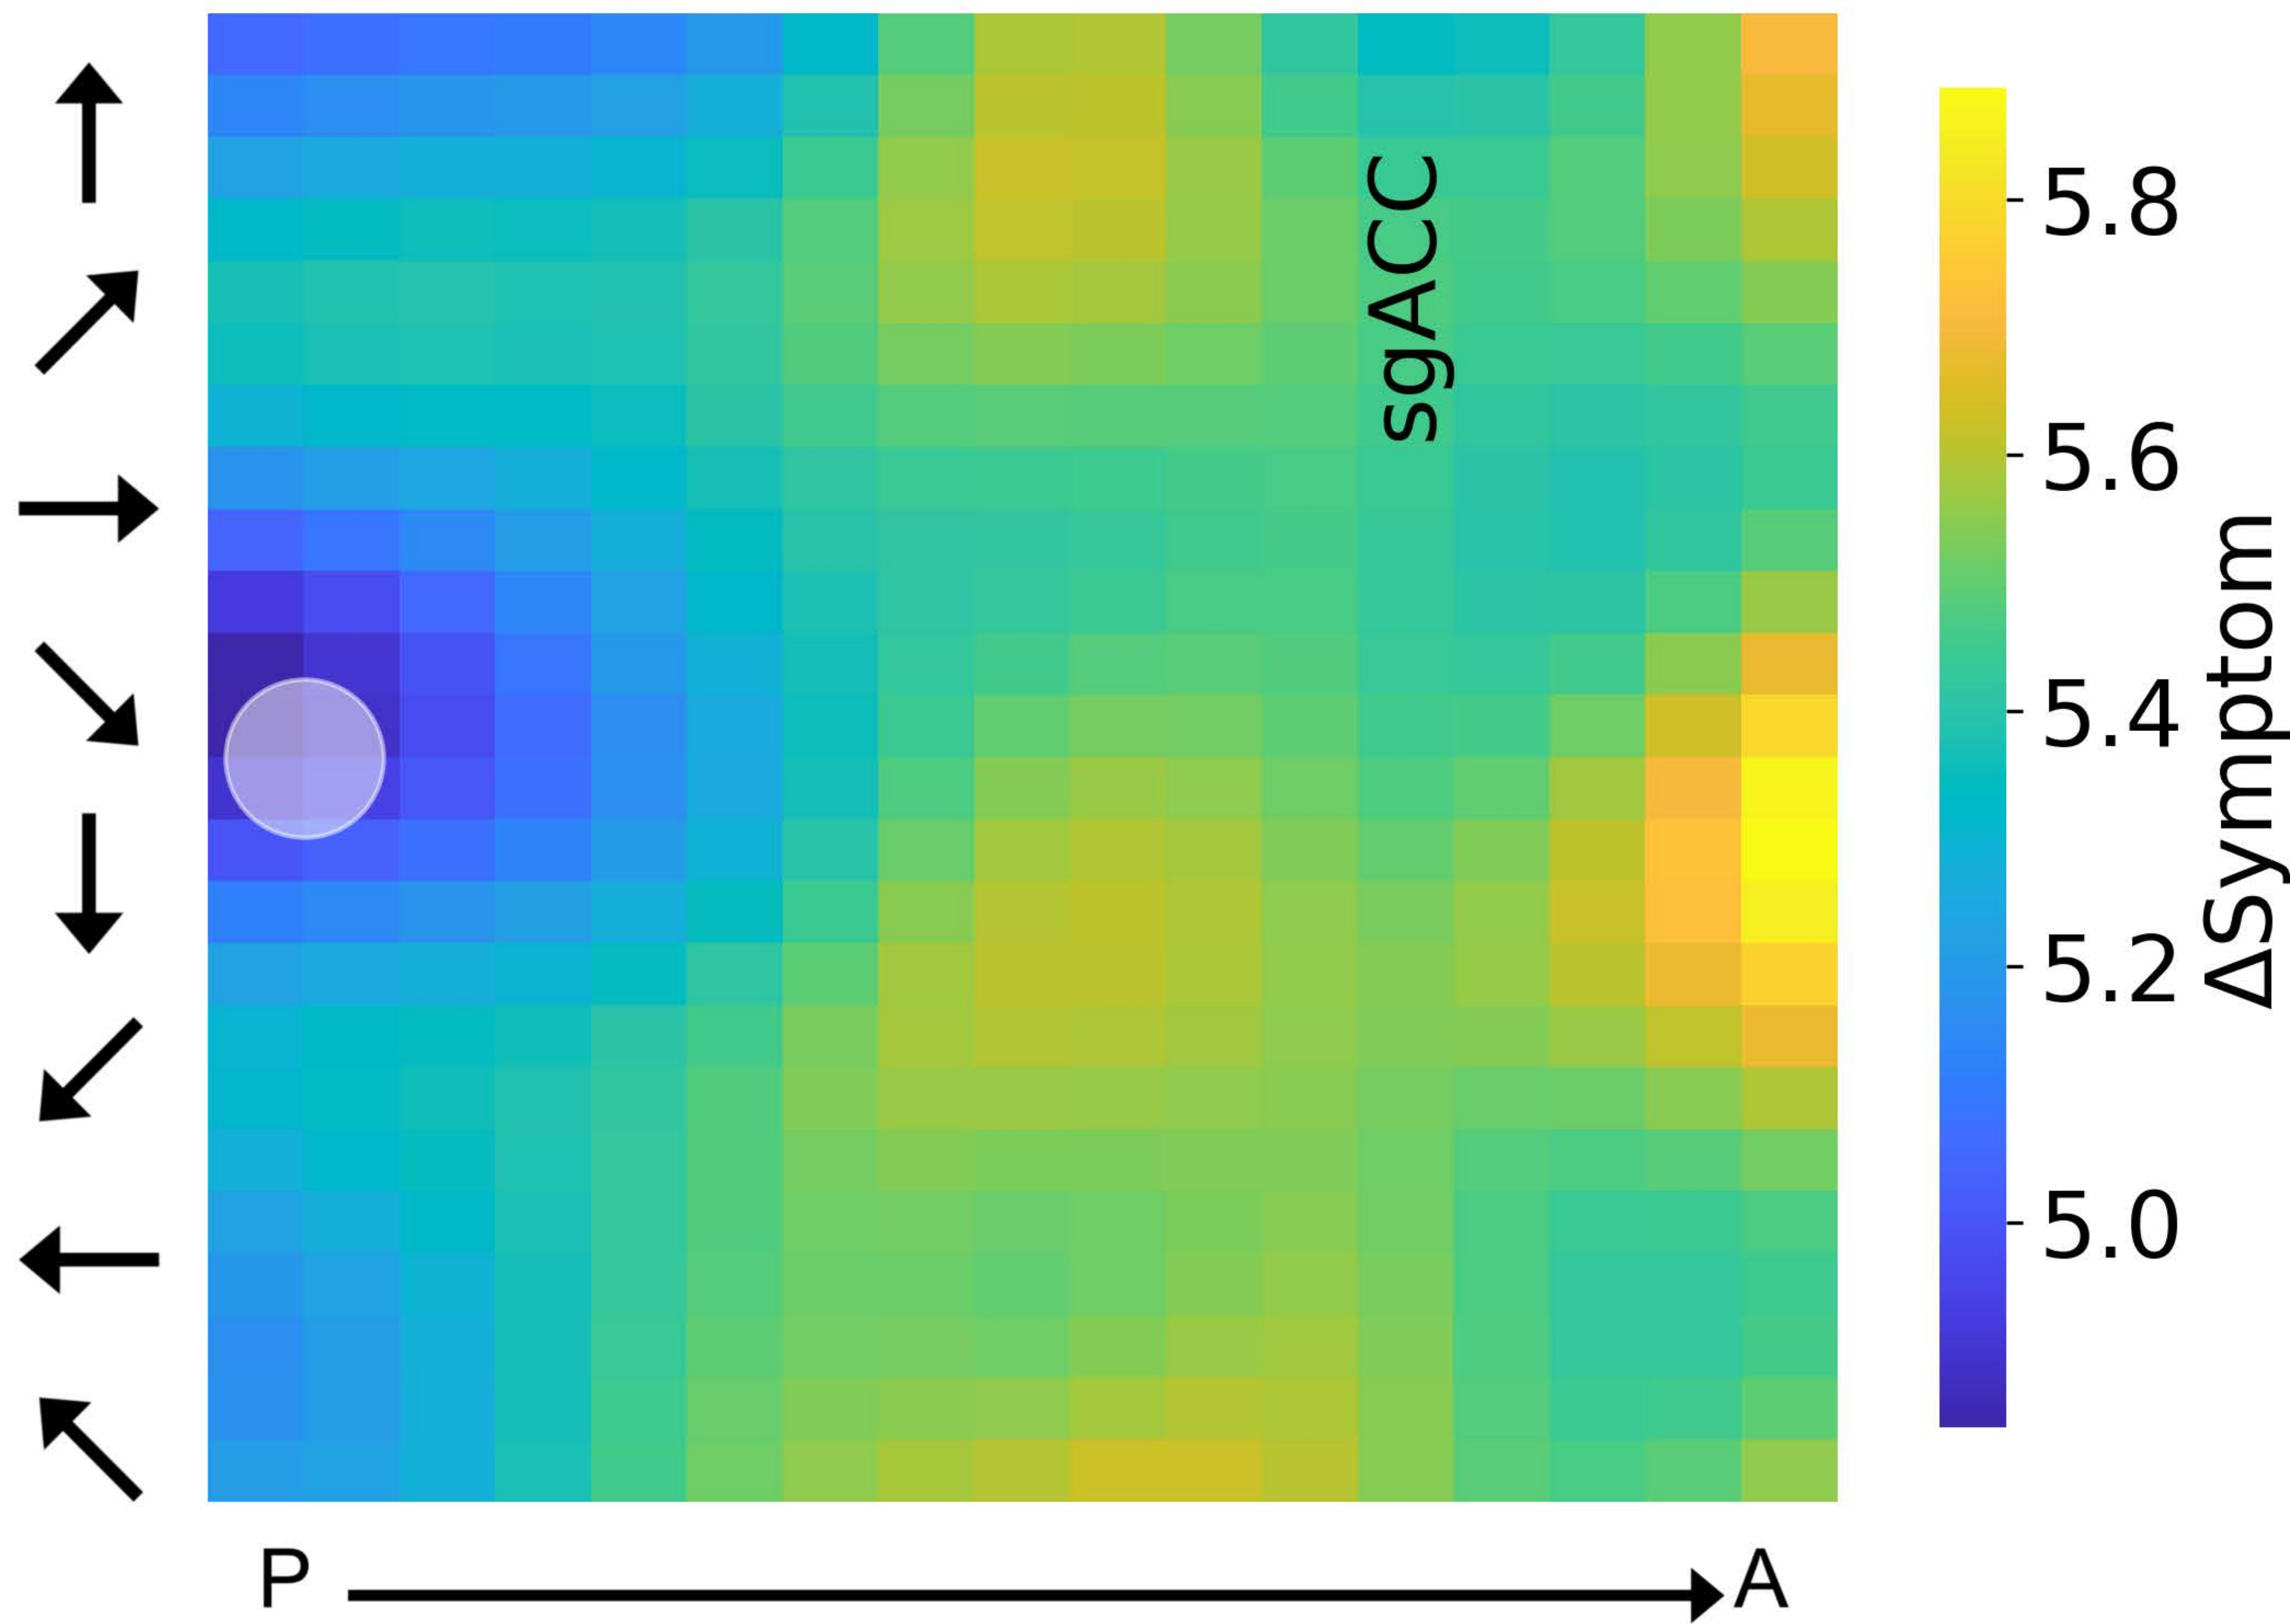



# NDARMF293AHT\_hamd\_right\_dlpfc

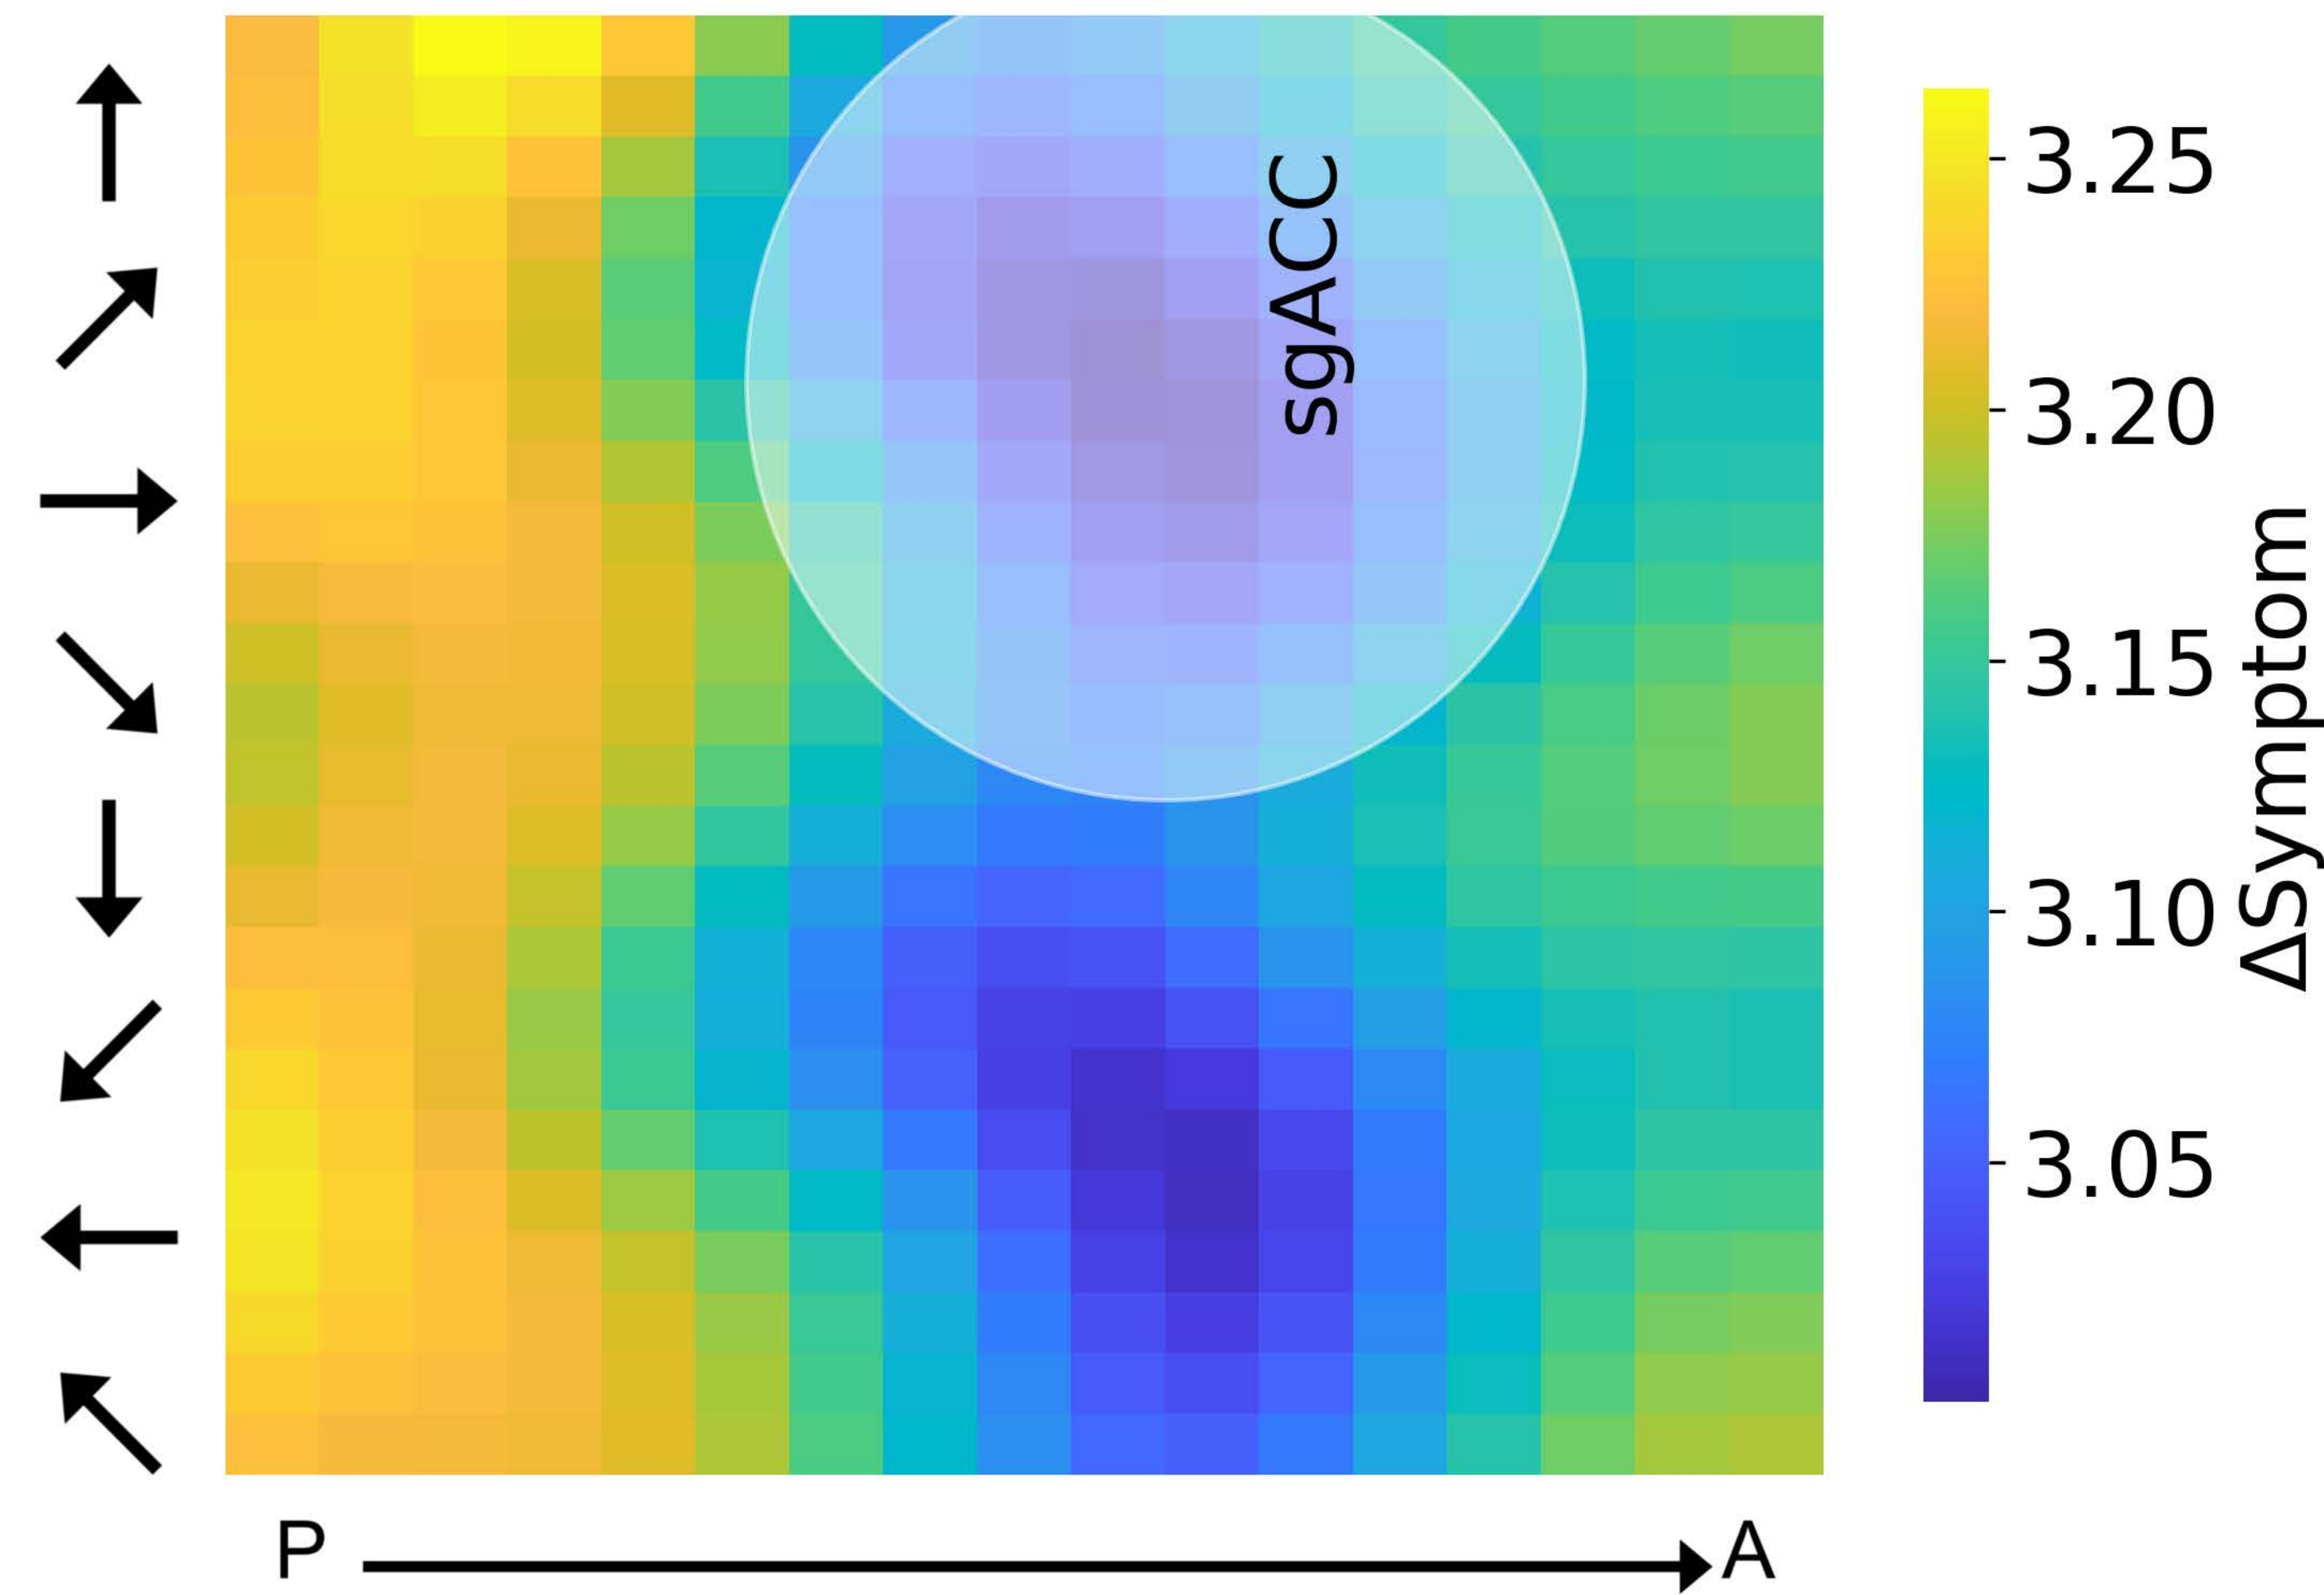



# NDARMK972BFE\_hamd\_right\_dlpfc

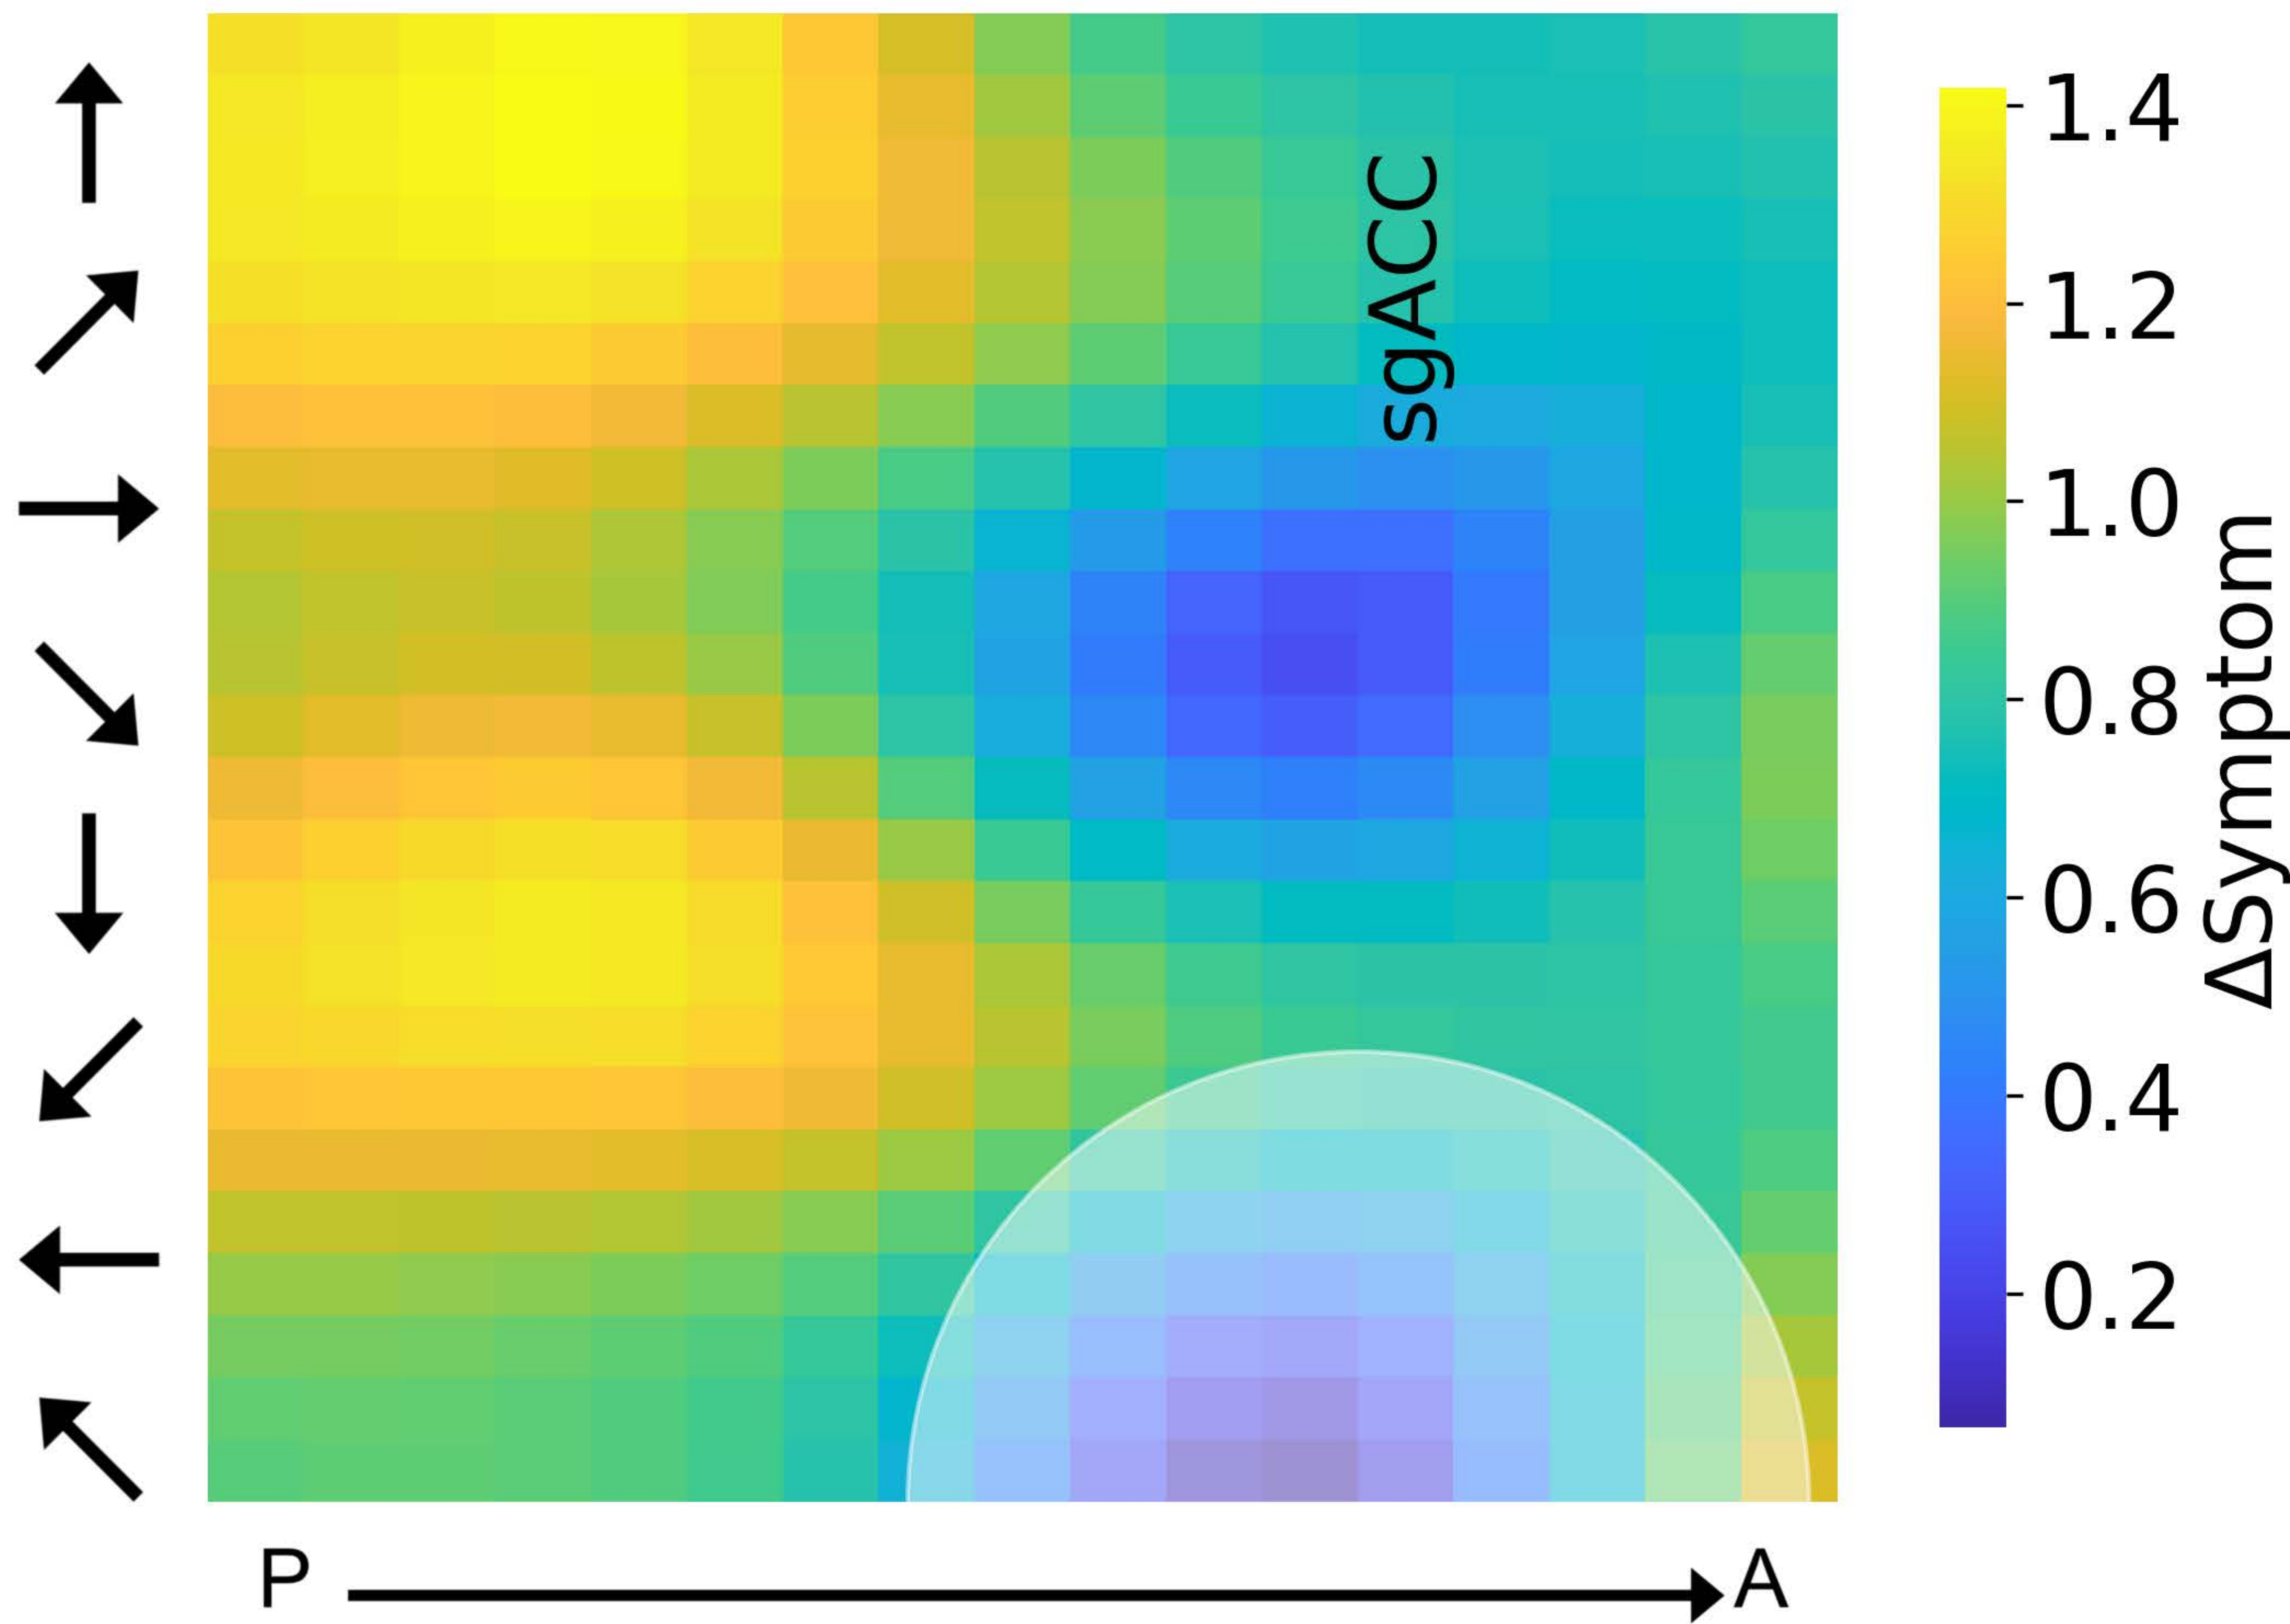



# NDARNA955LXG\_hamd\_right\_dlpfc

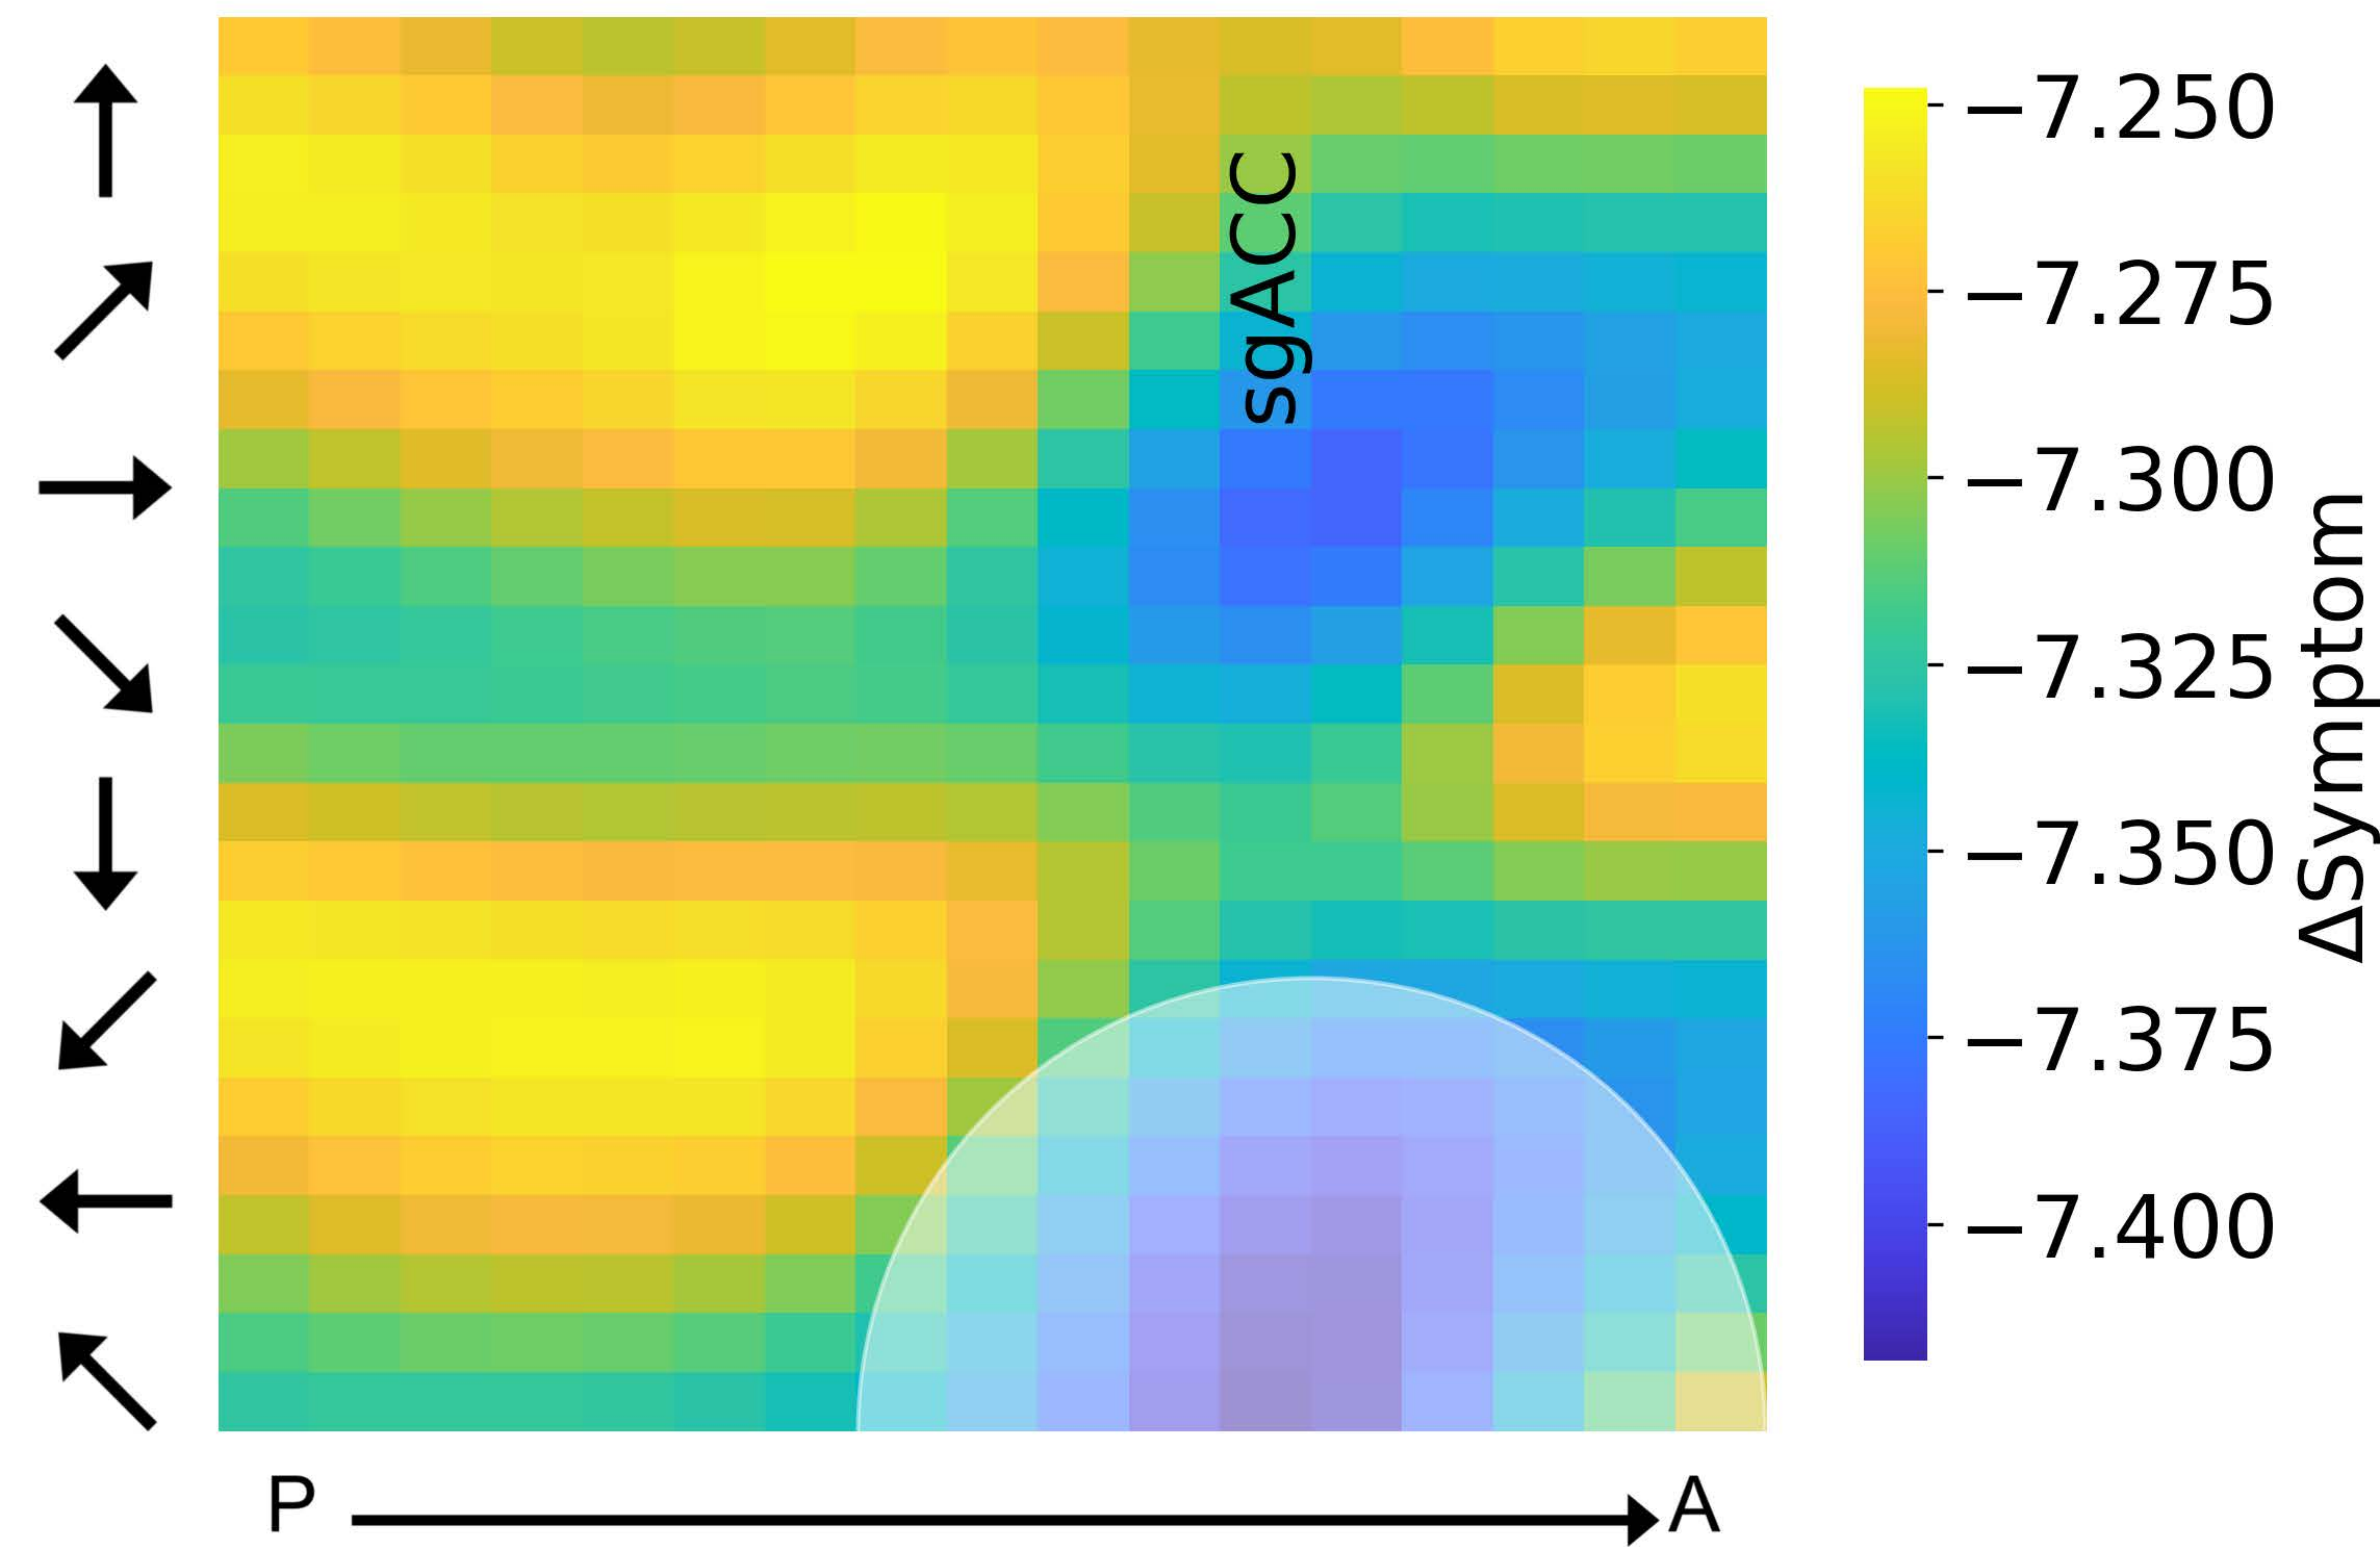



# NDARNR764NAK\_hamd\_right\_dlpfc

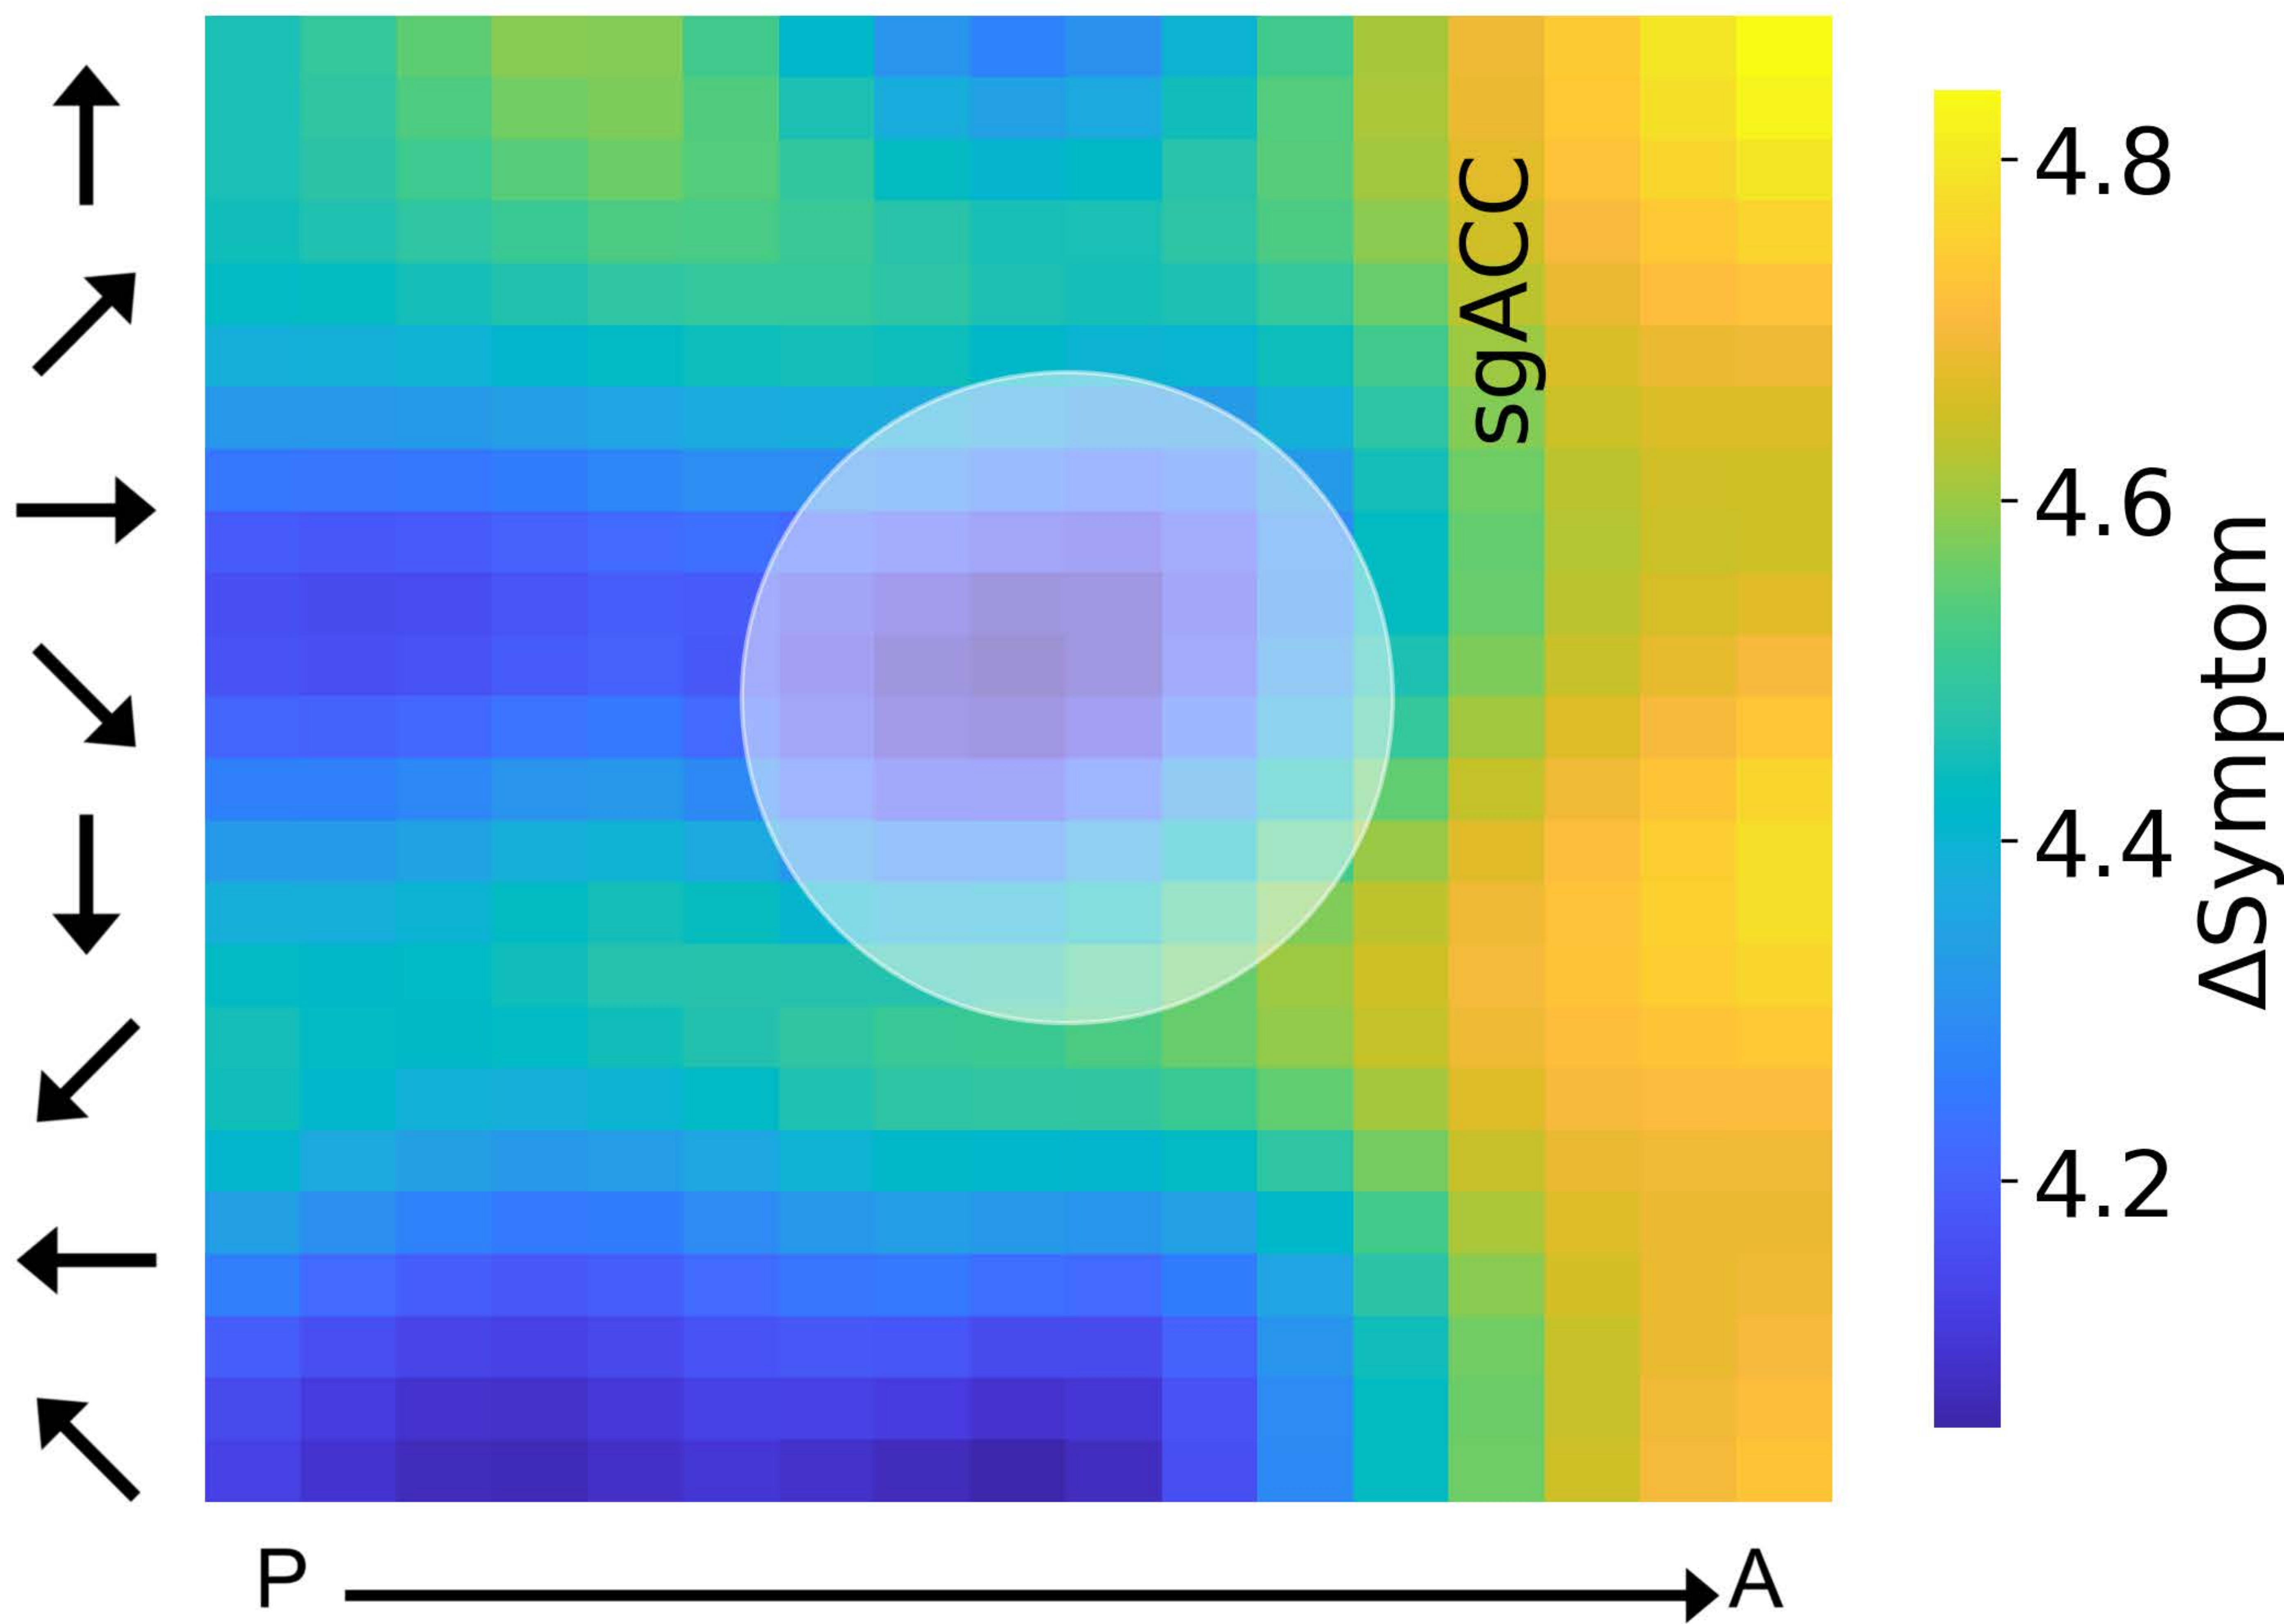



# NDARNU180HL3\_hamd\_right\_dlpfc

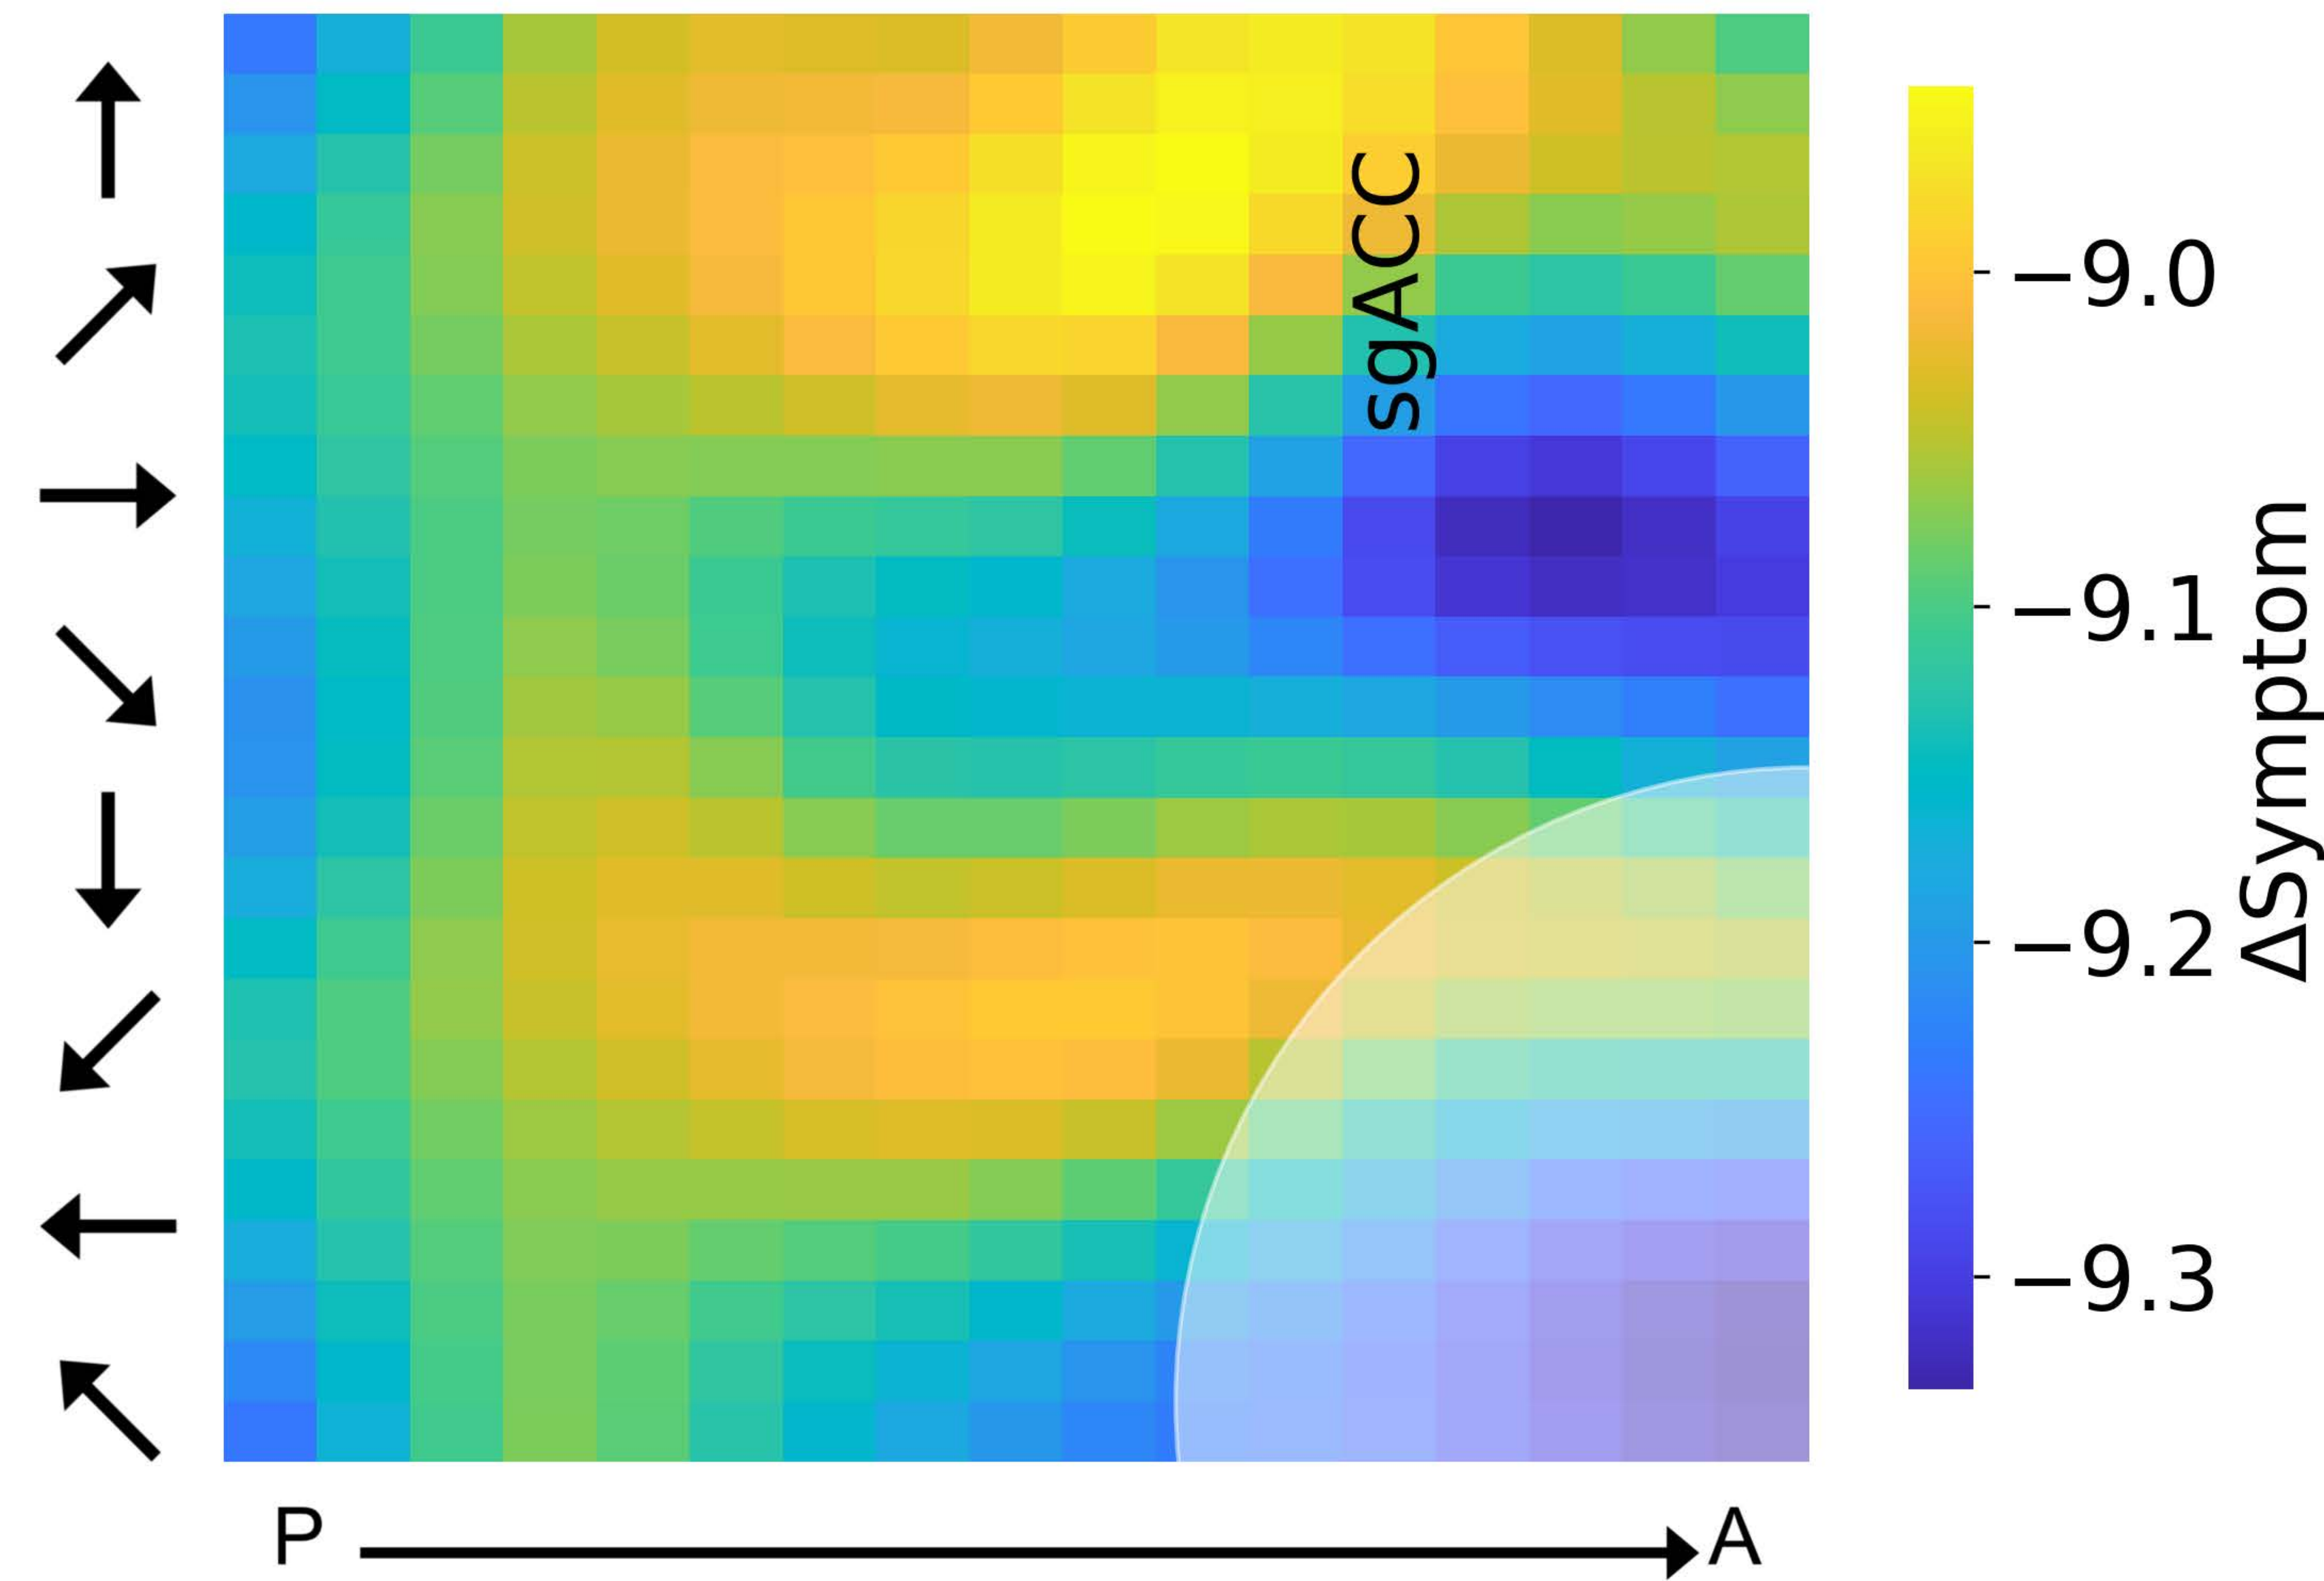



# NDARNZ824XHB\_hamd\_right\_dlpfc

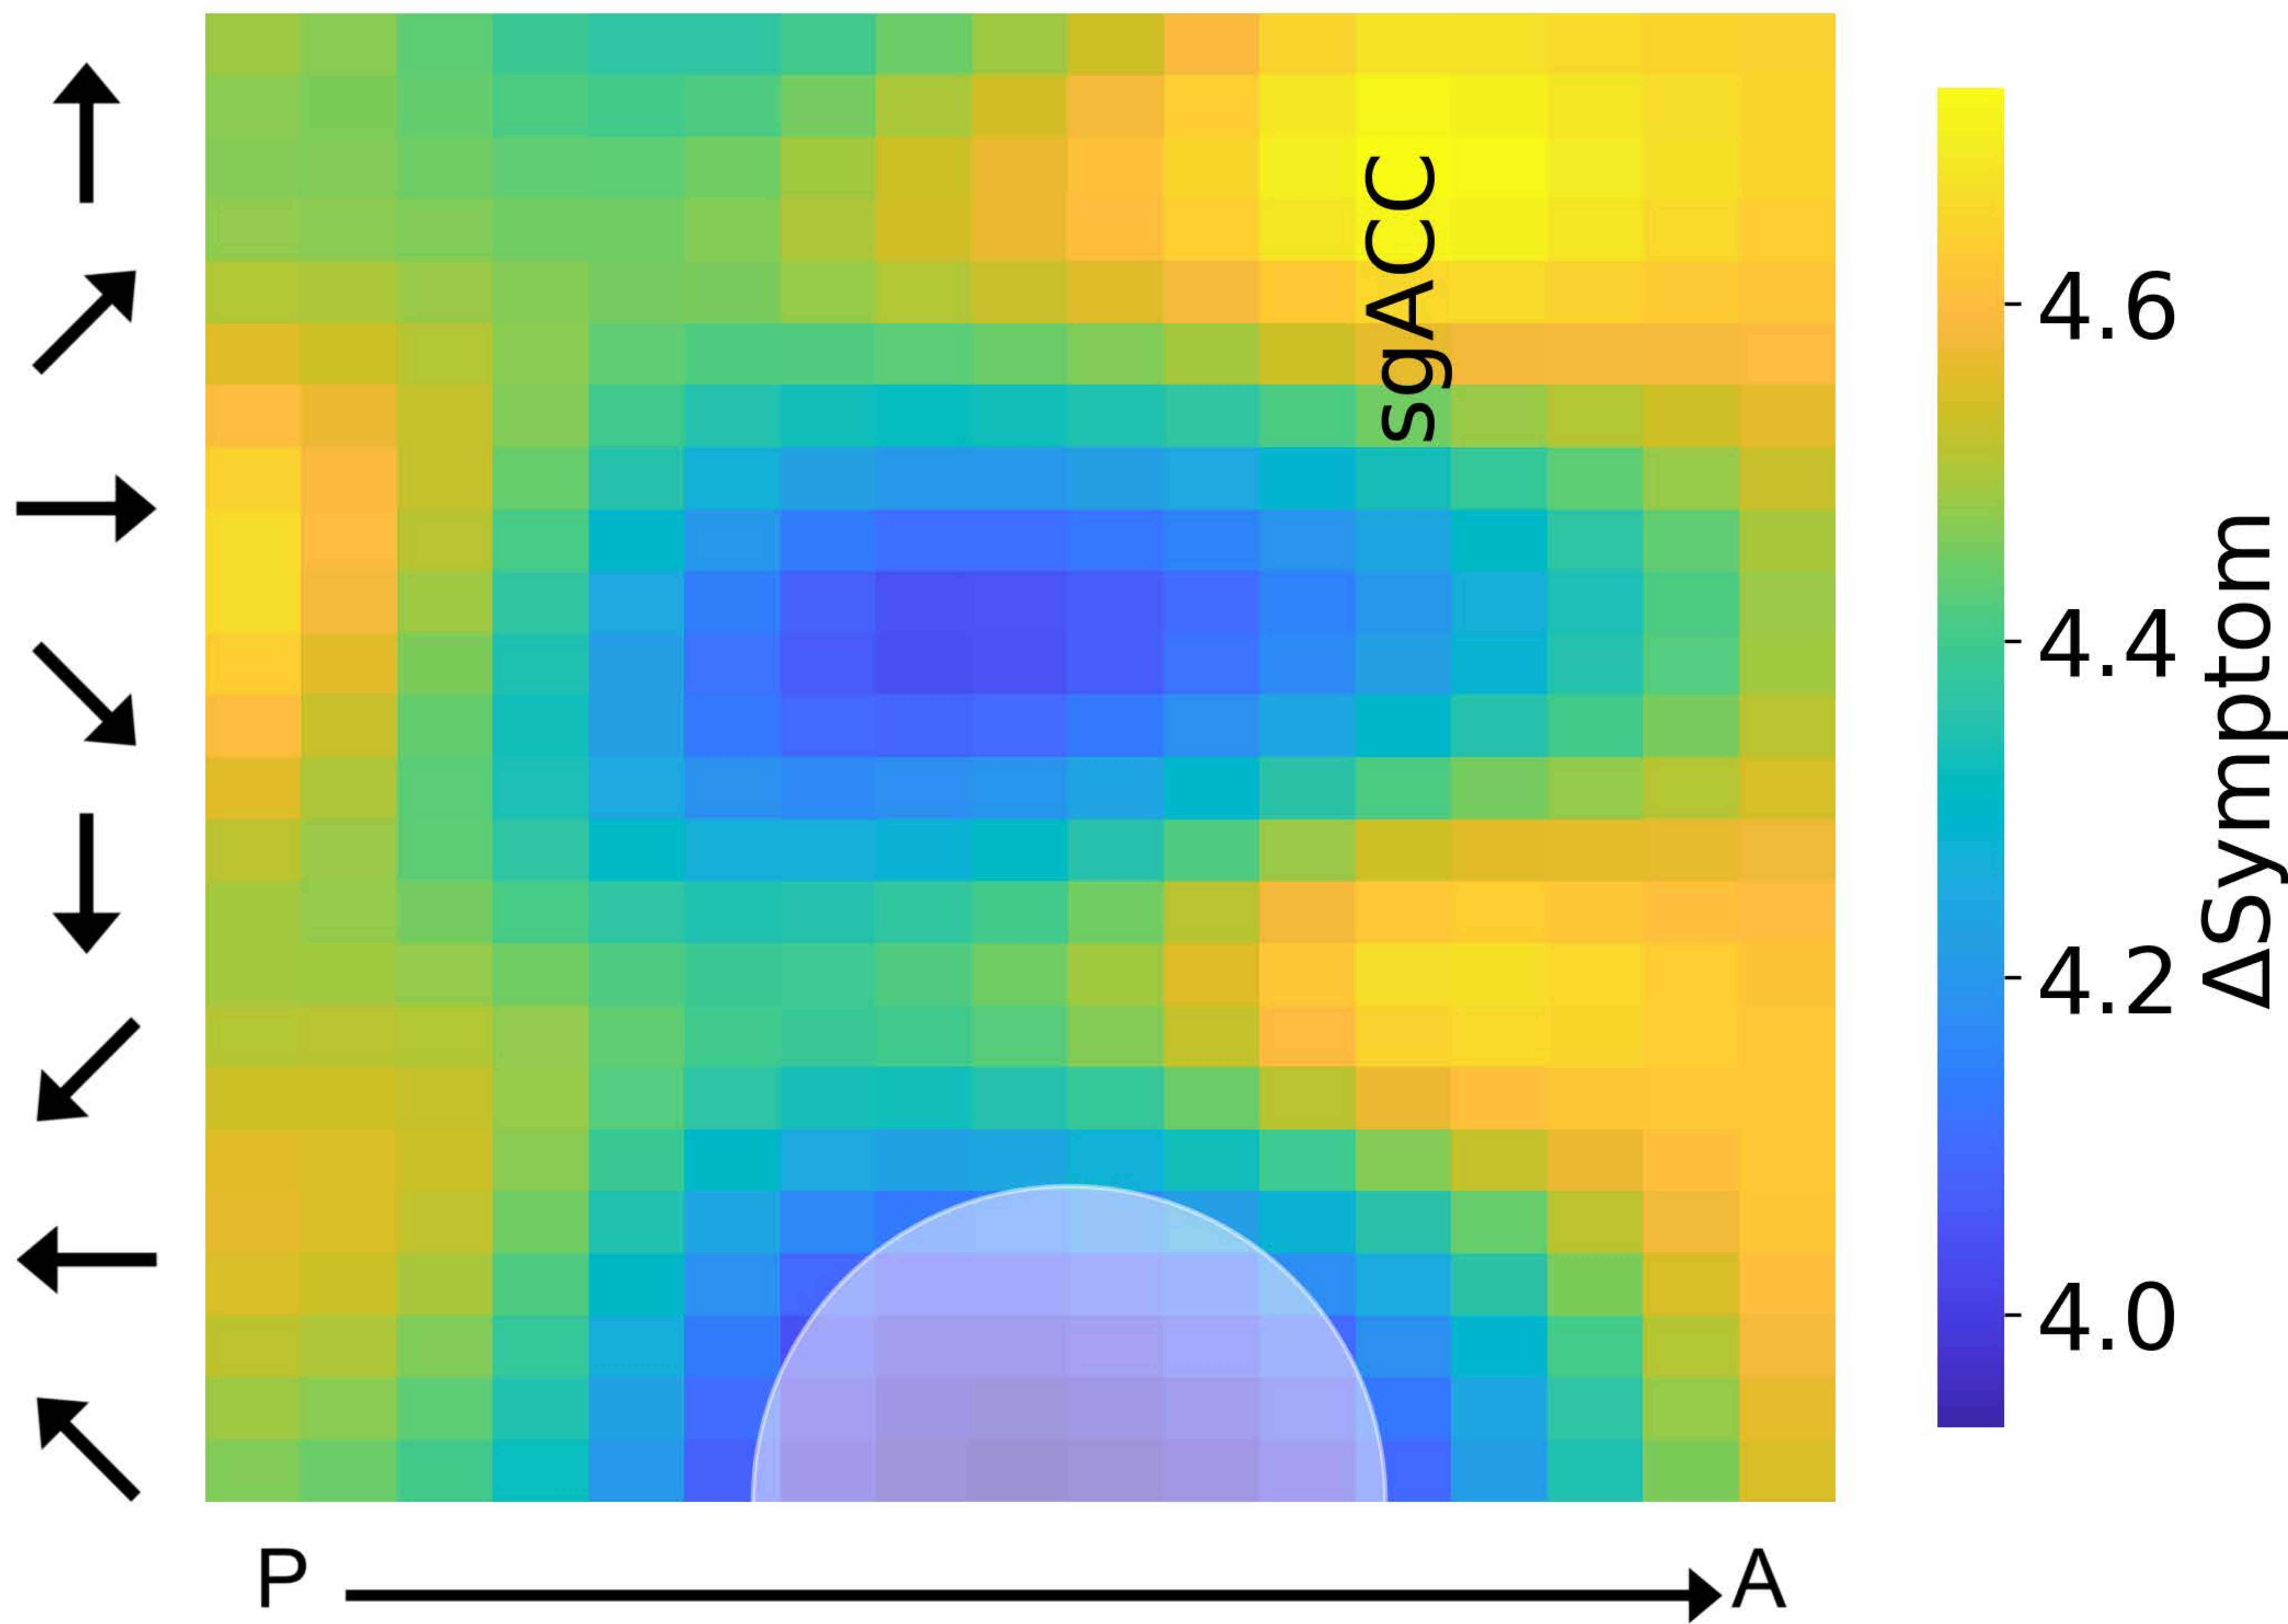



# NDARPA762UGZ\_hamd\_right\_dlpfc

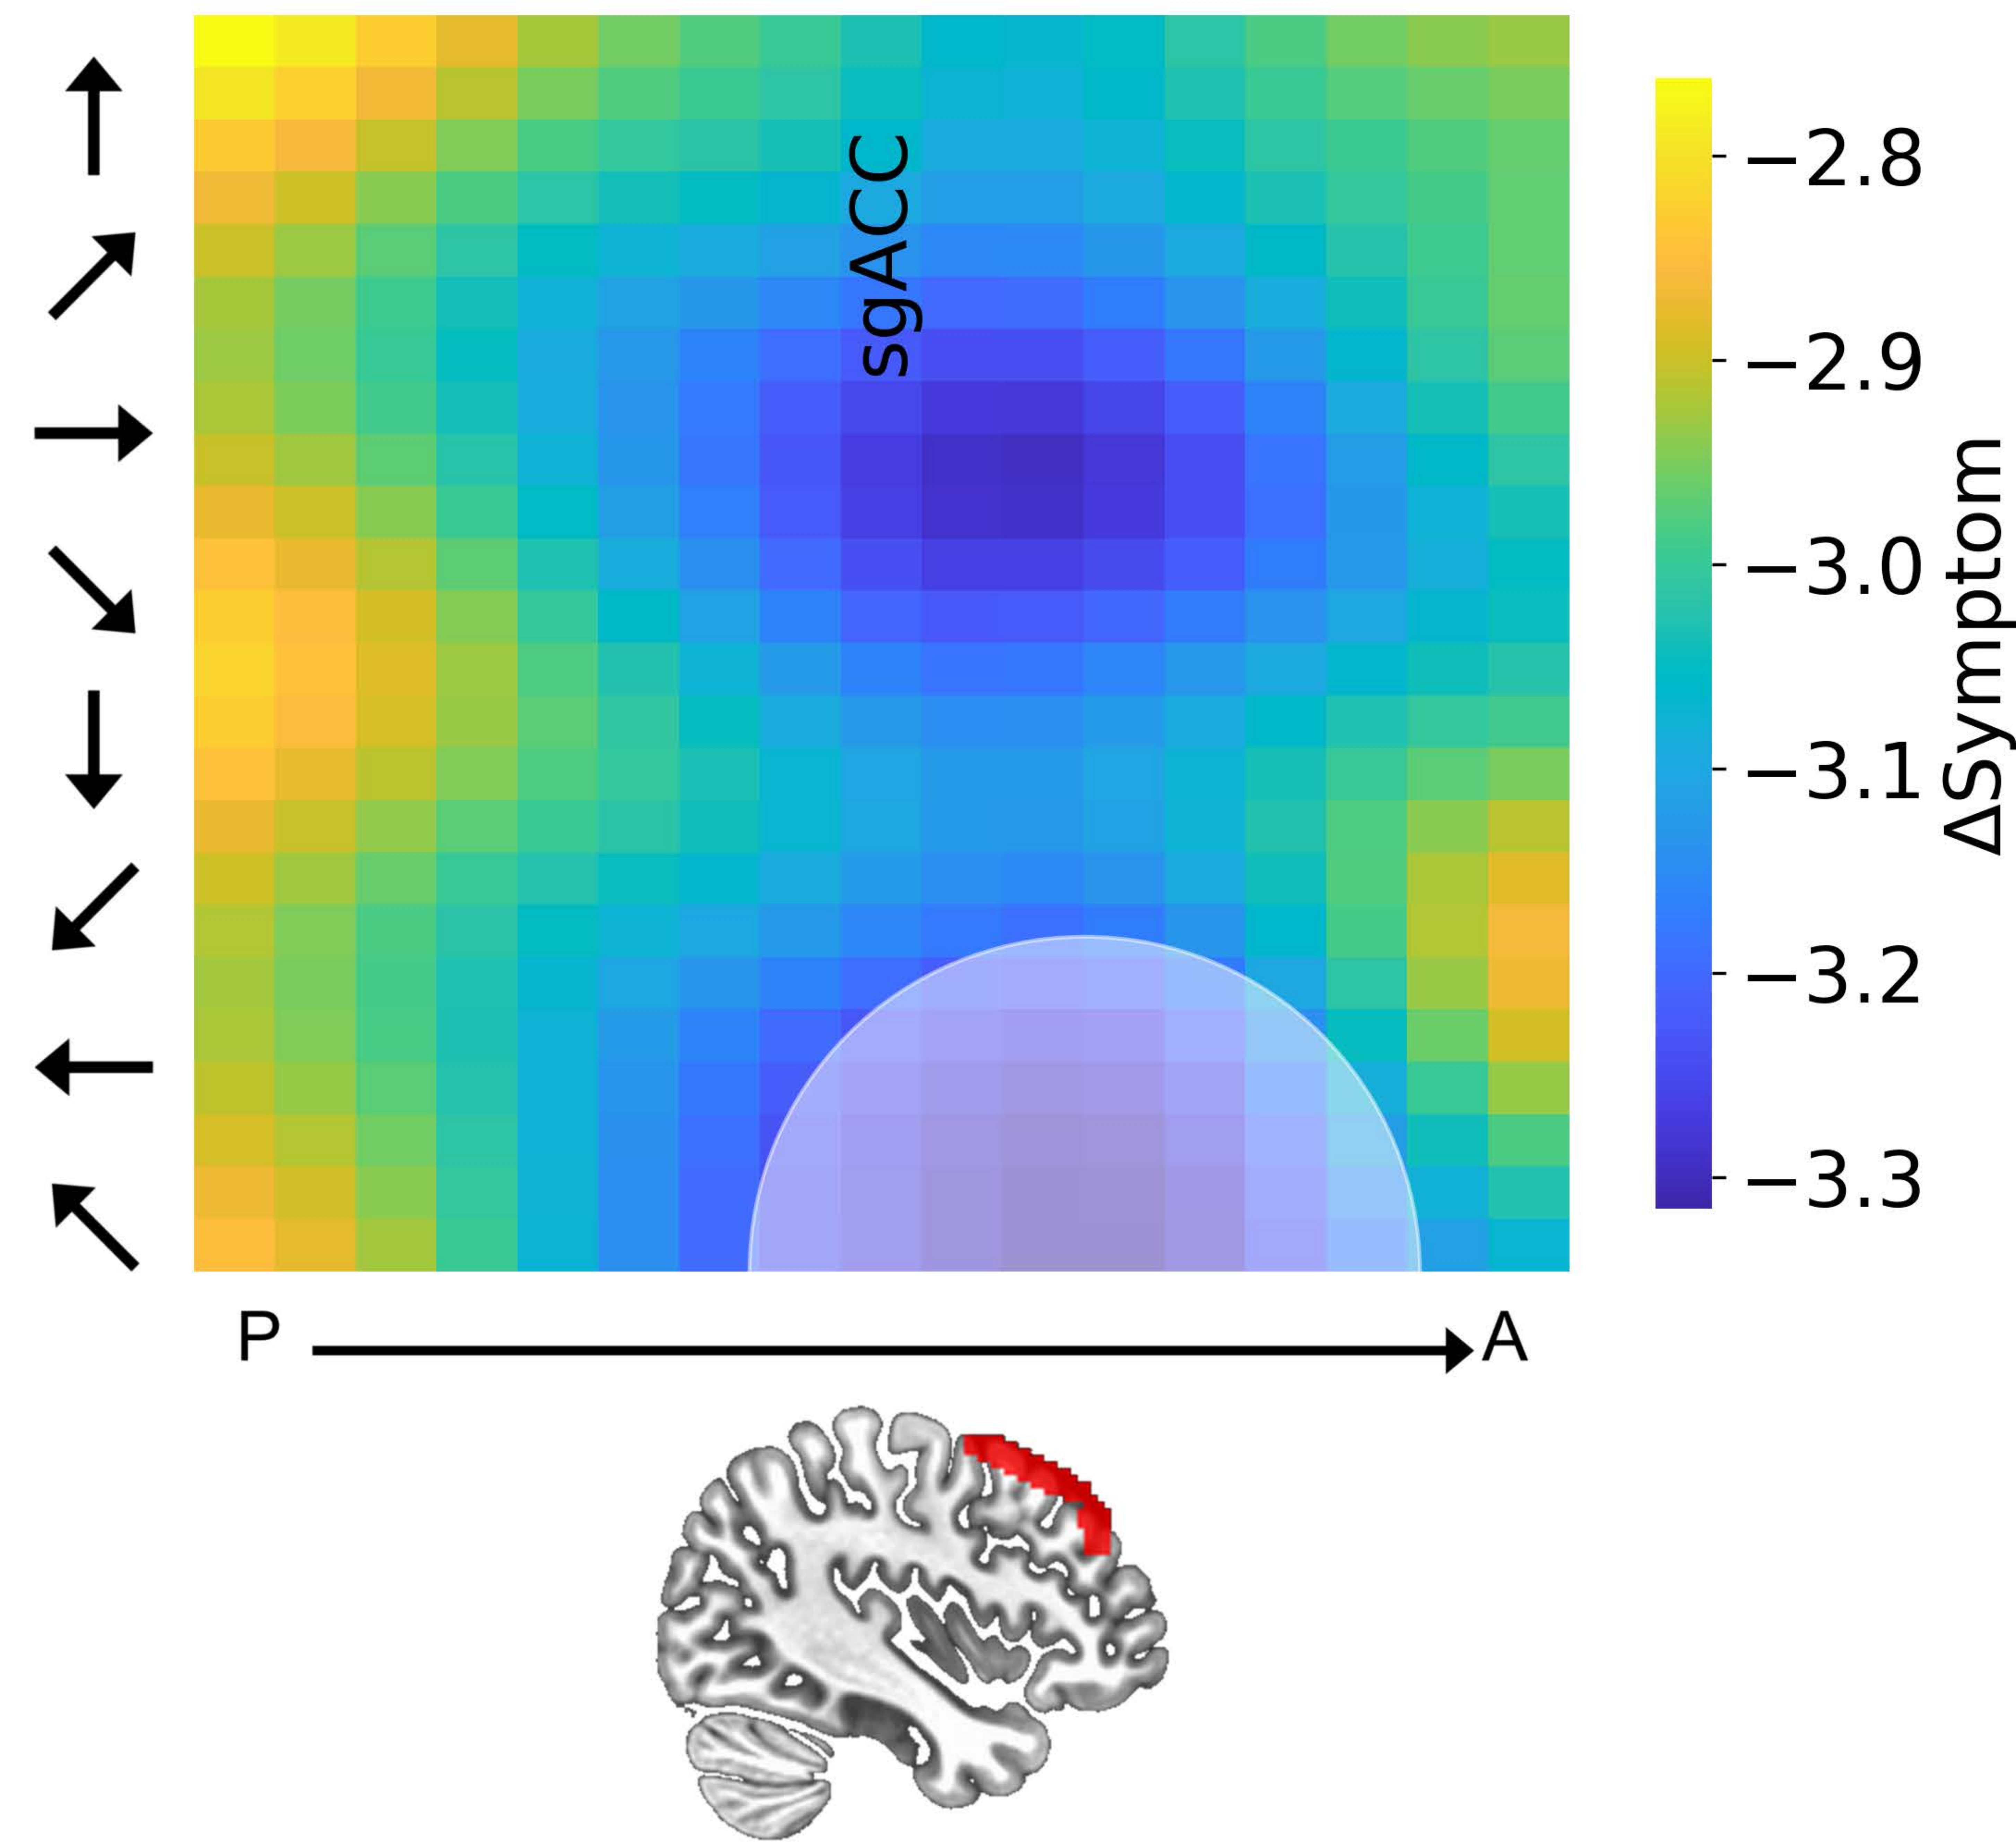



# NDARPC197VR3\_hamd\_right\_dlpfc

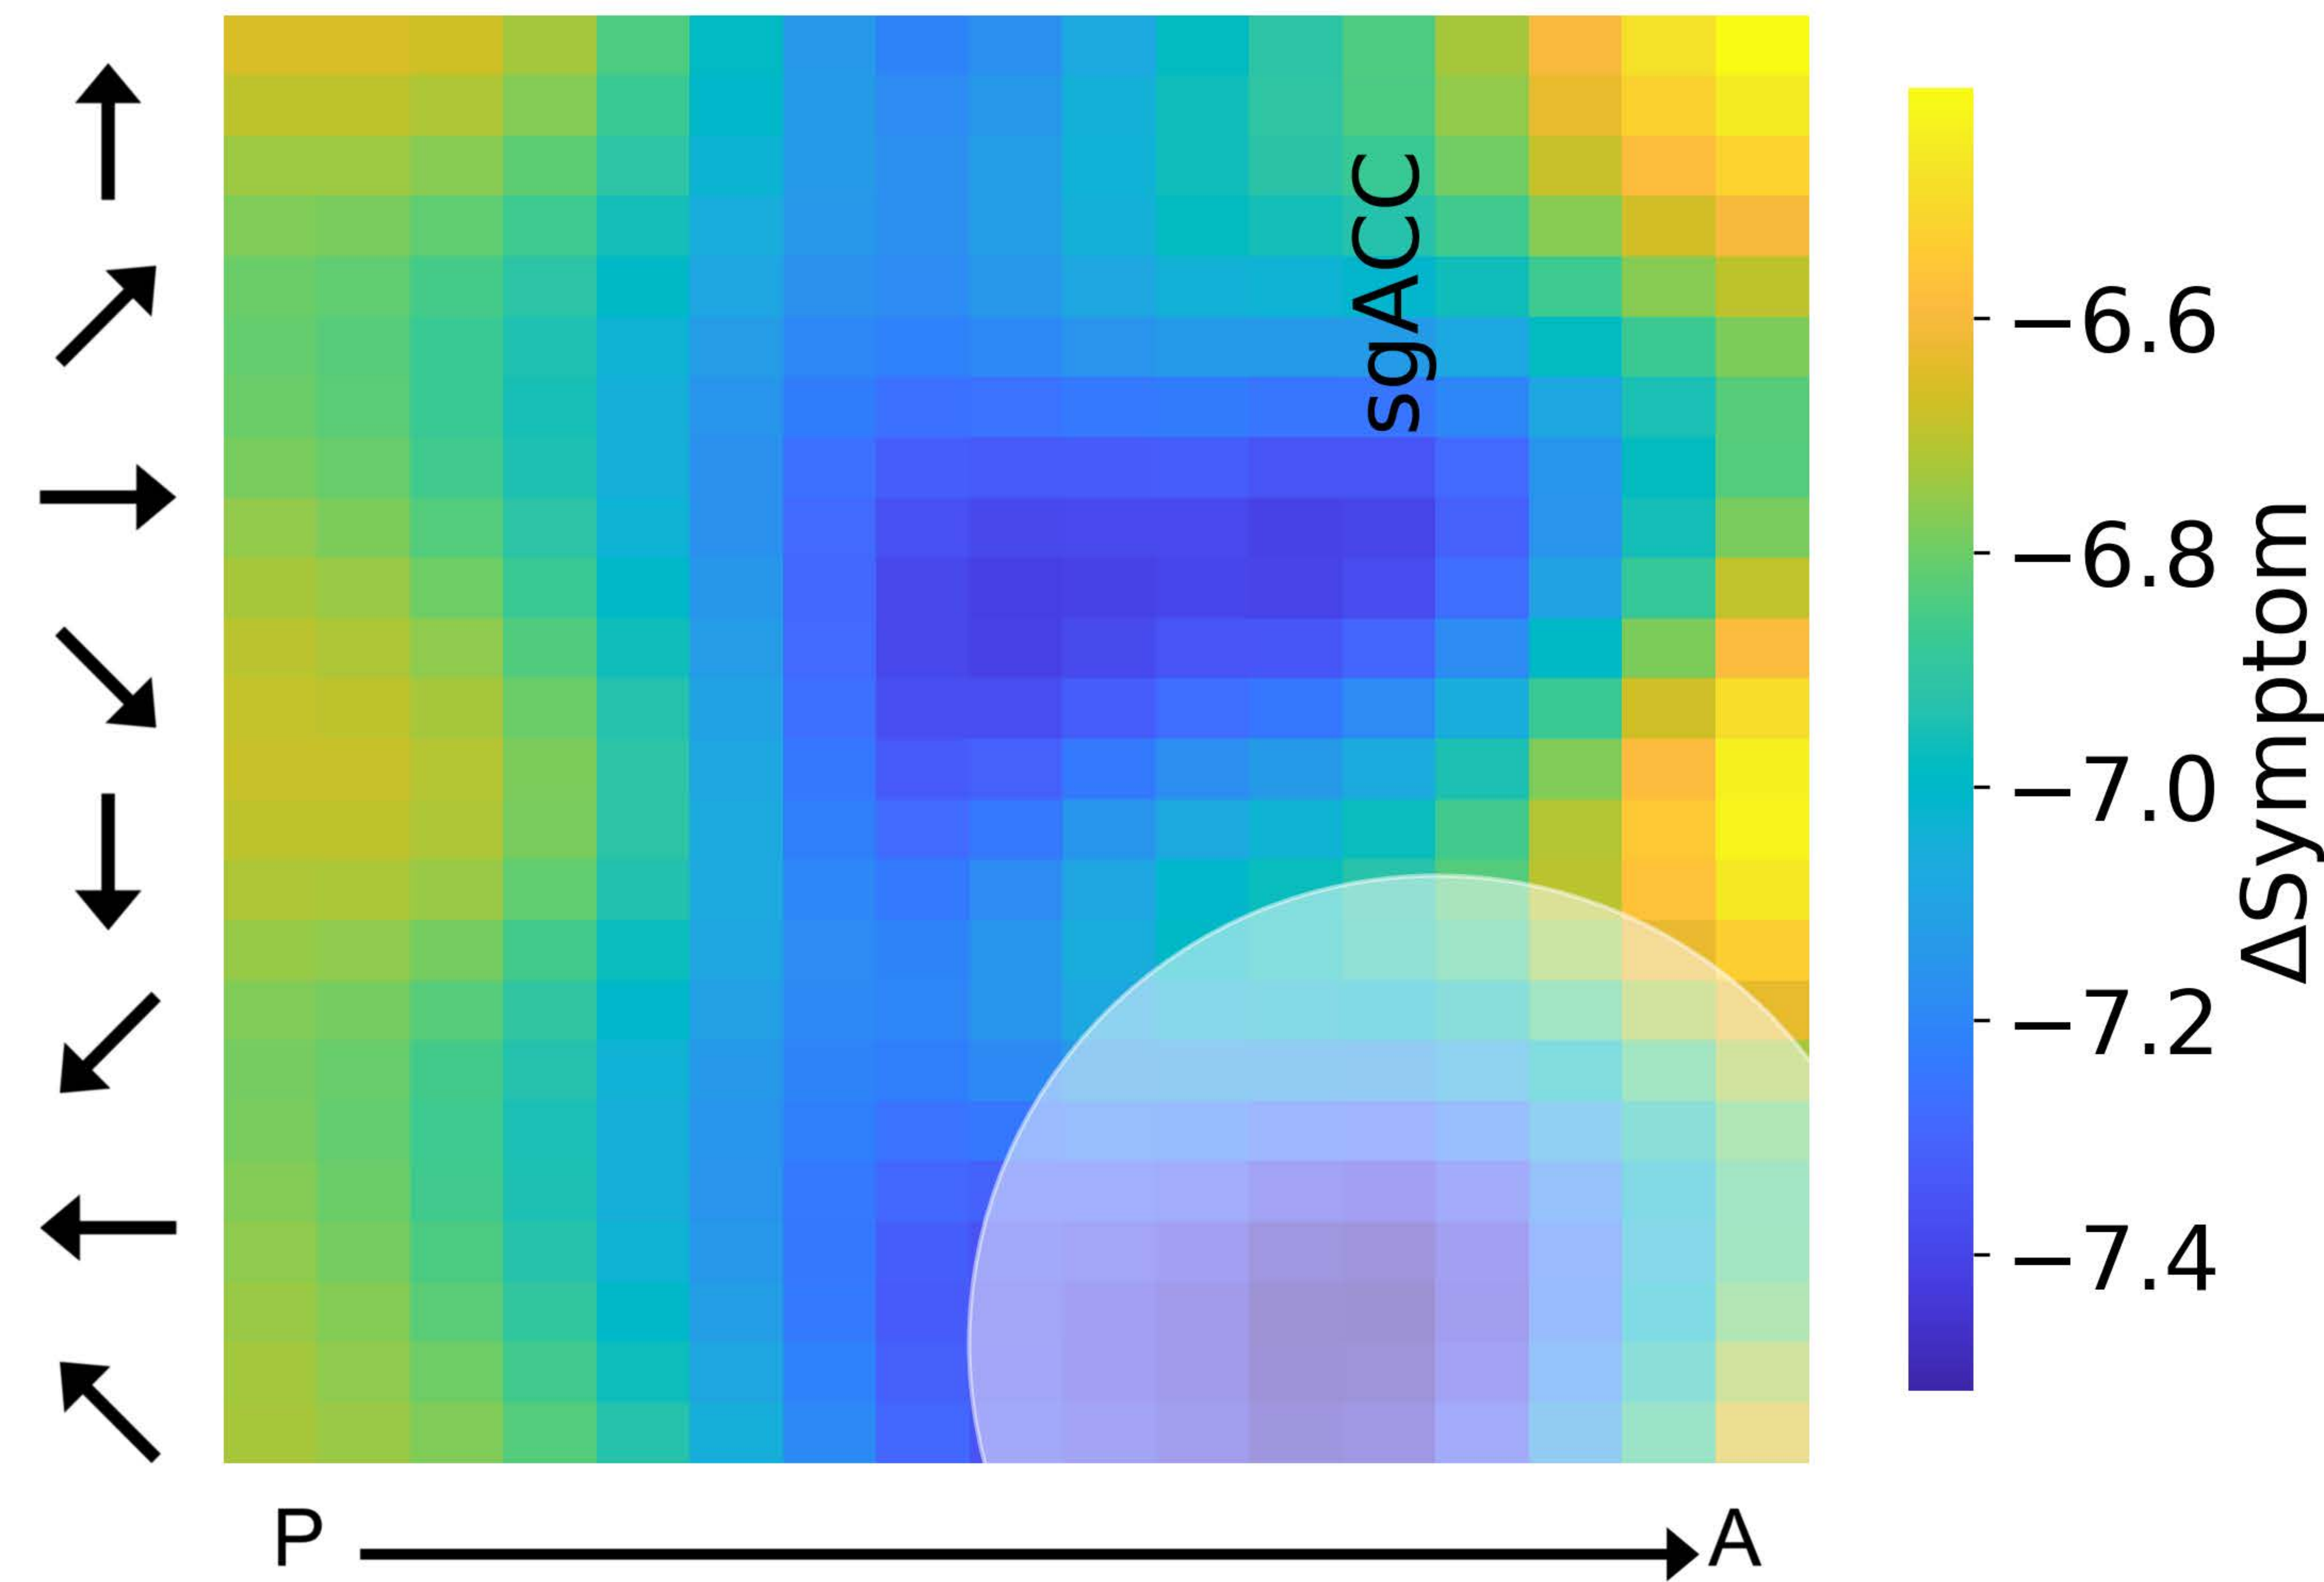



# INDARPF499HVH\_hamd\_right\_dlpfc

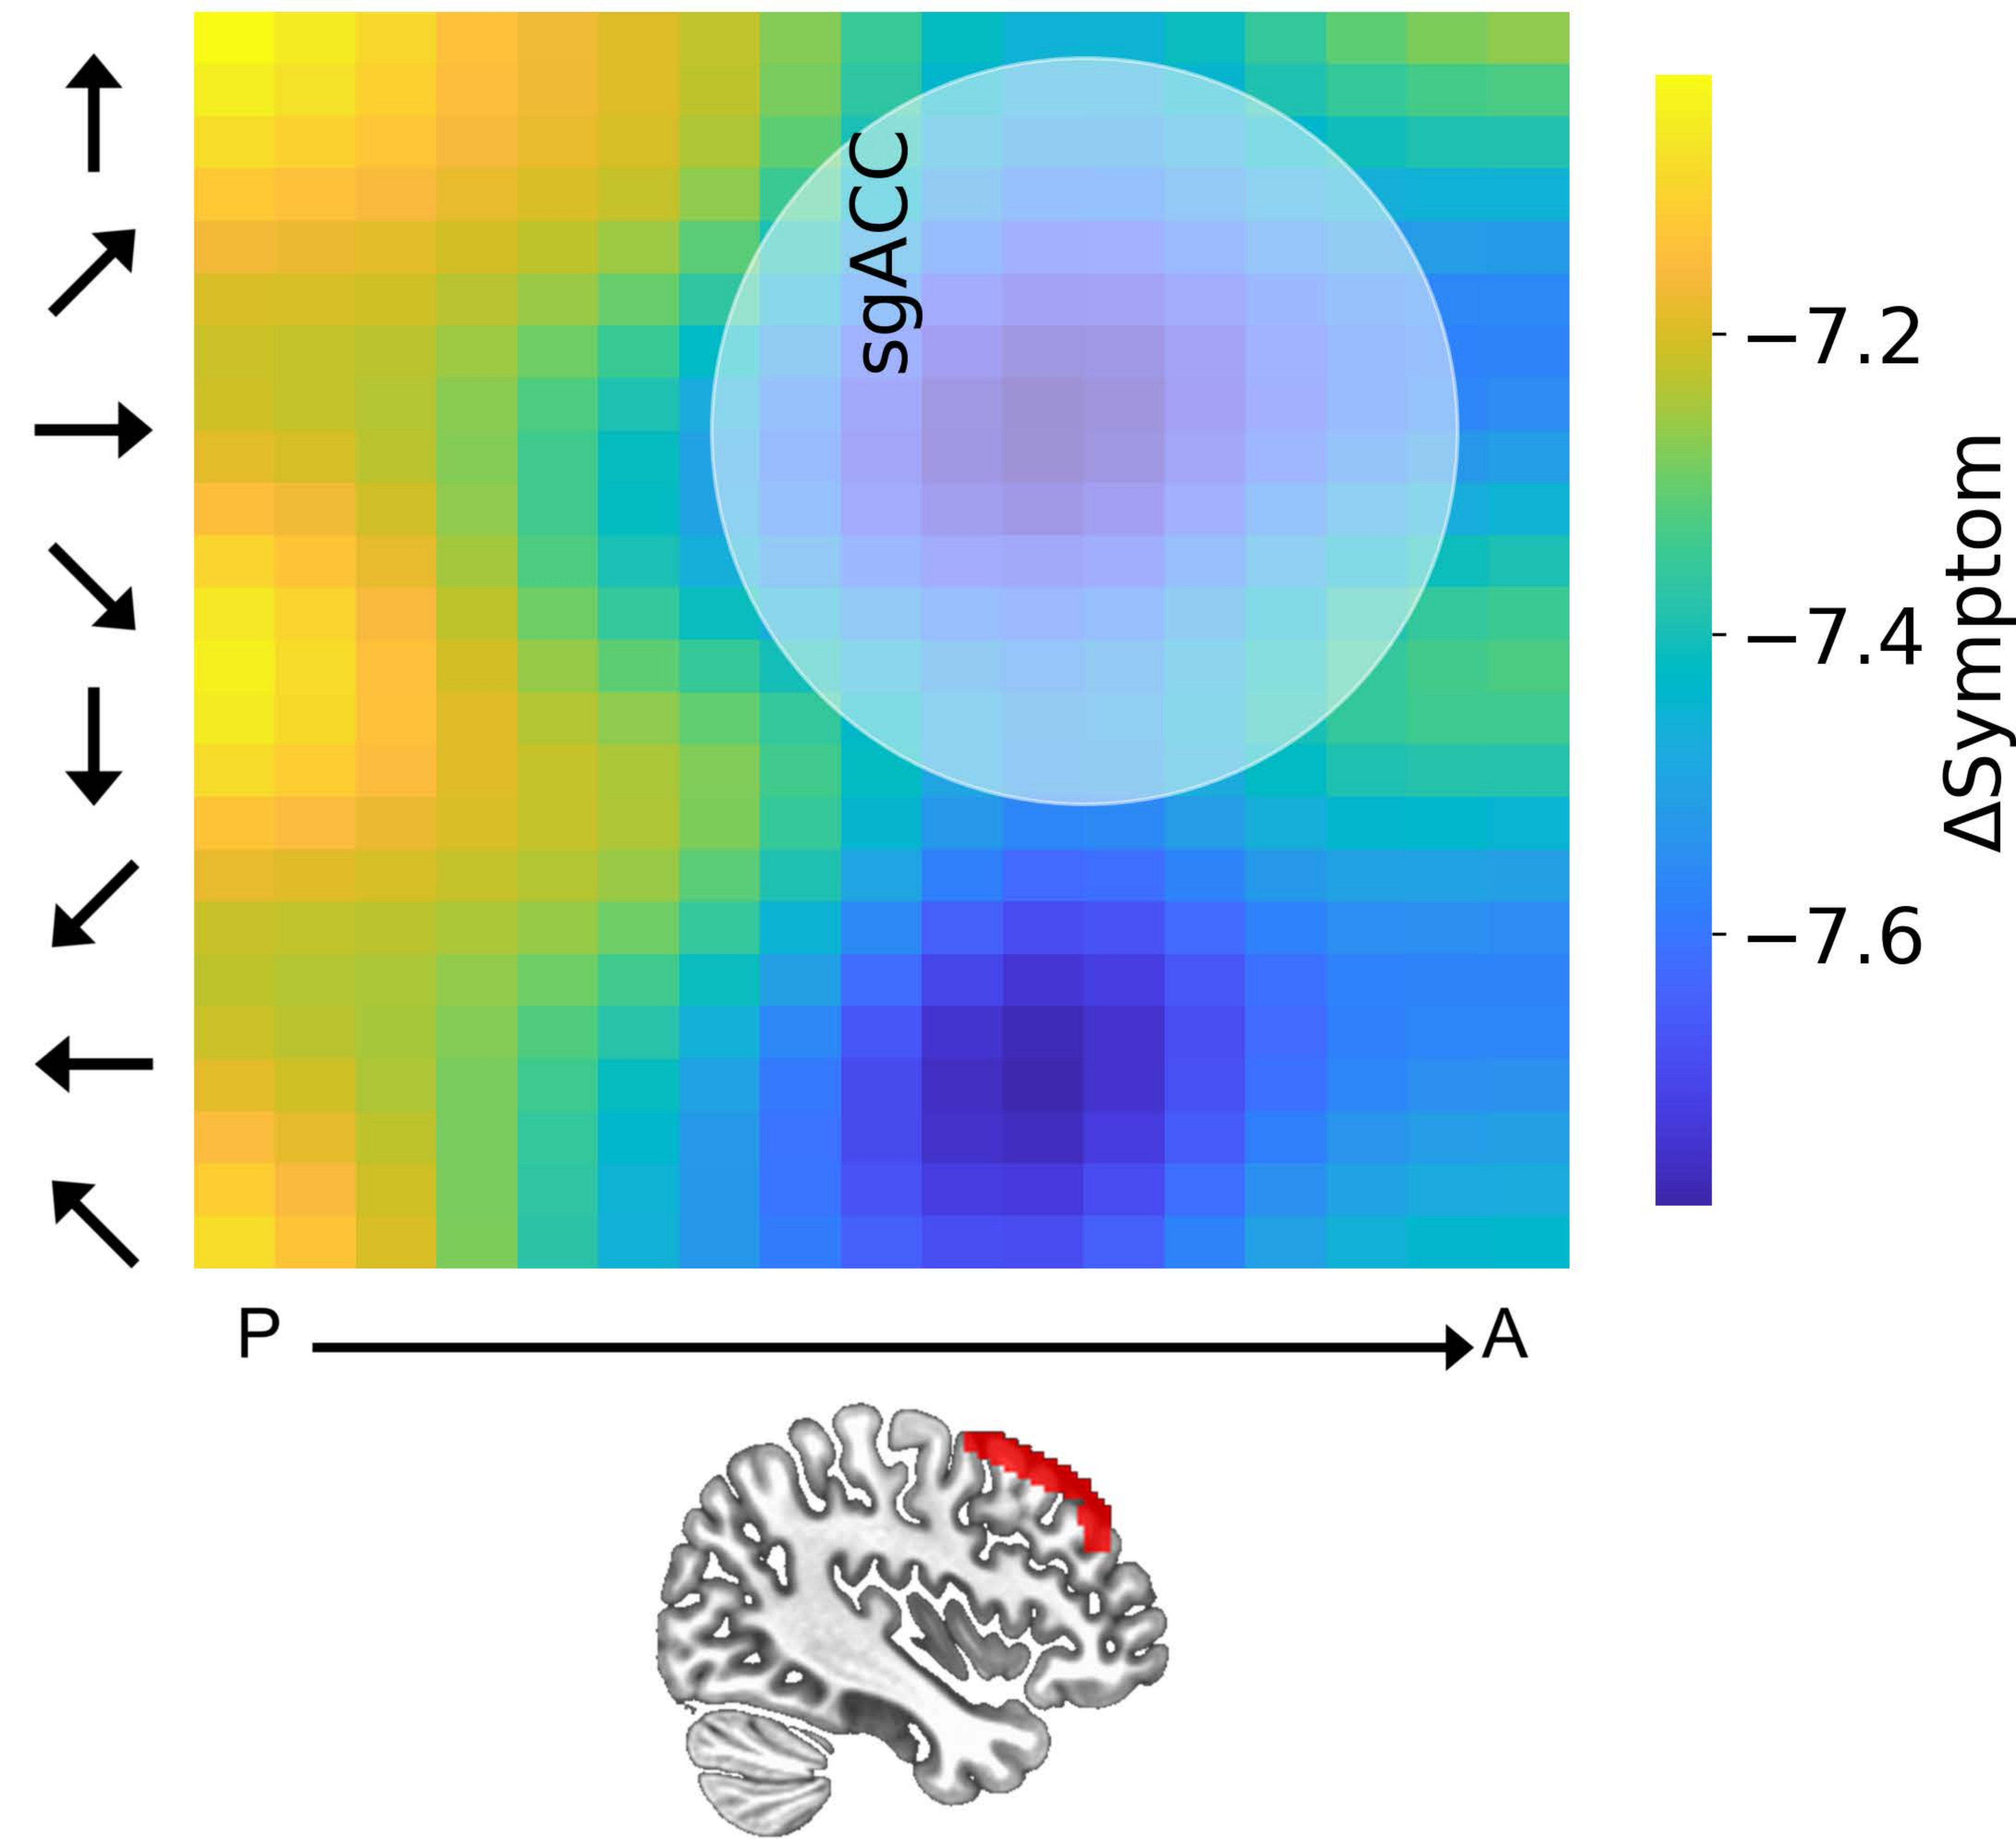



# INDARPK811MVW\_hamd\_right\_dlpfc

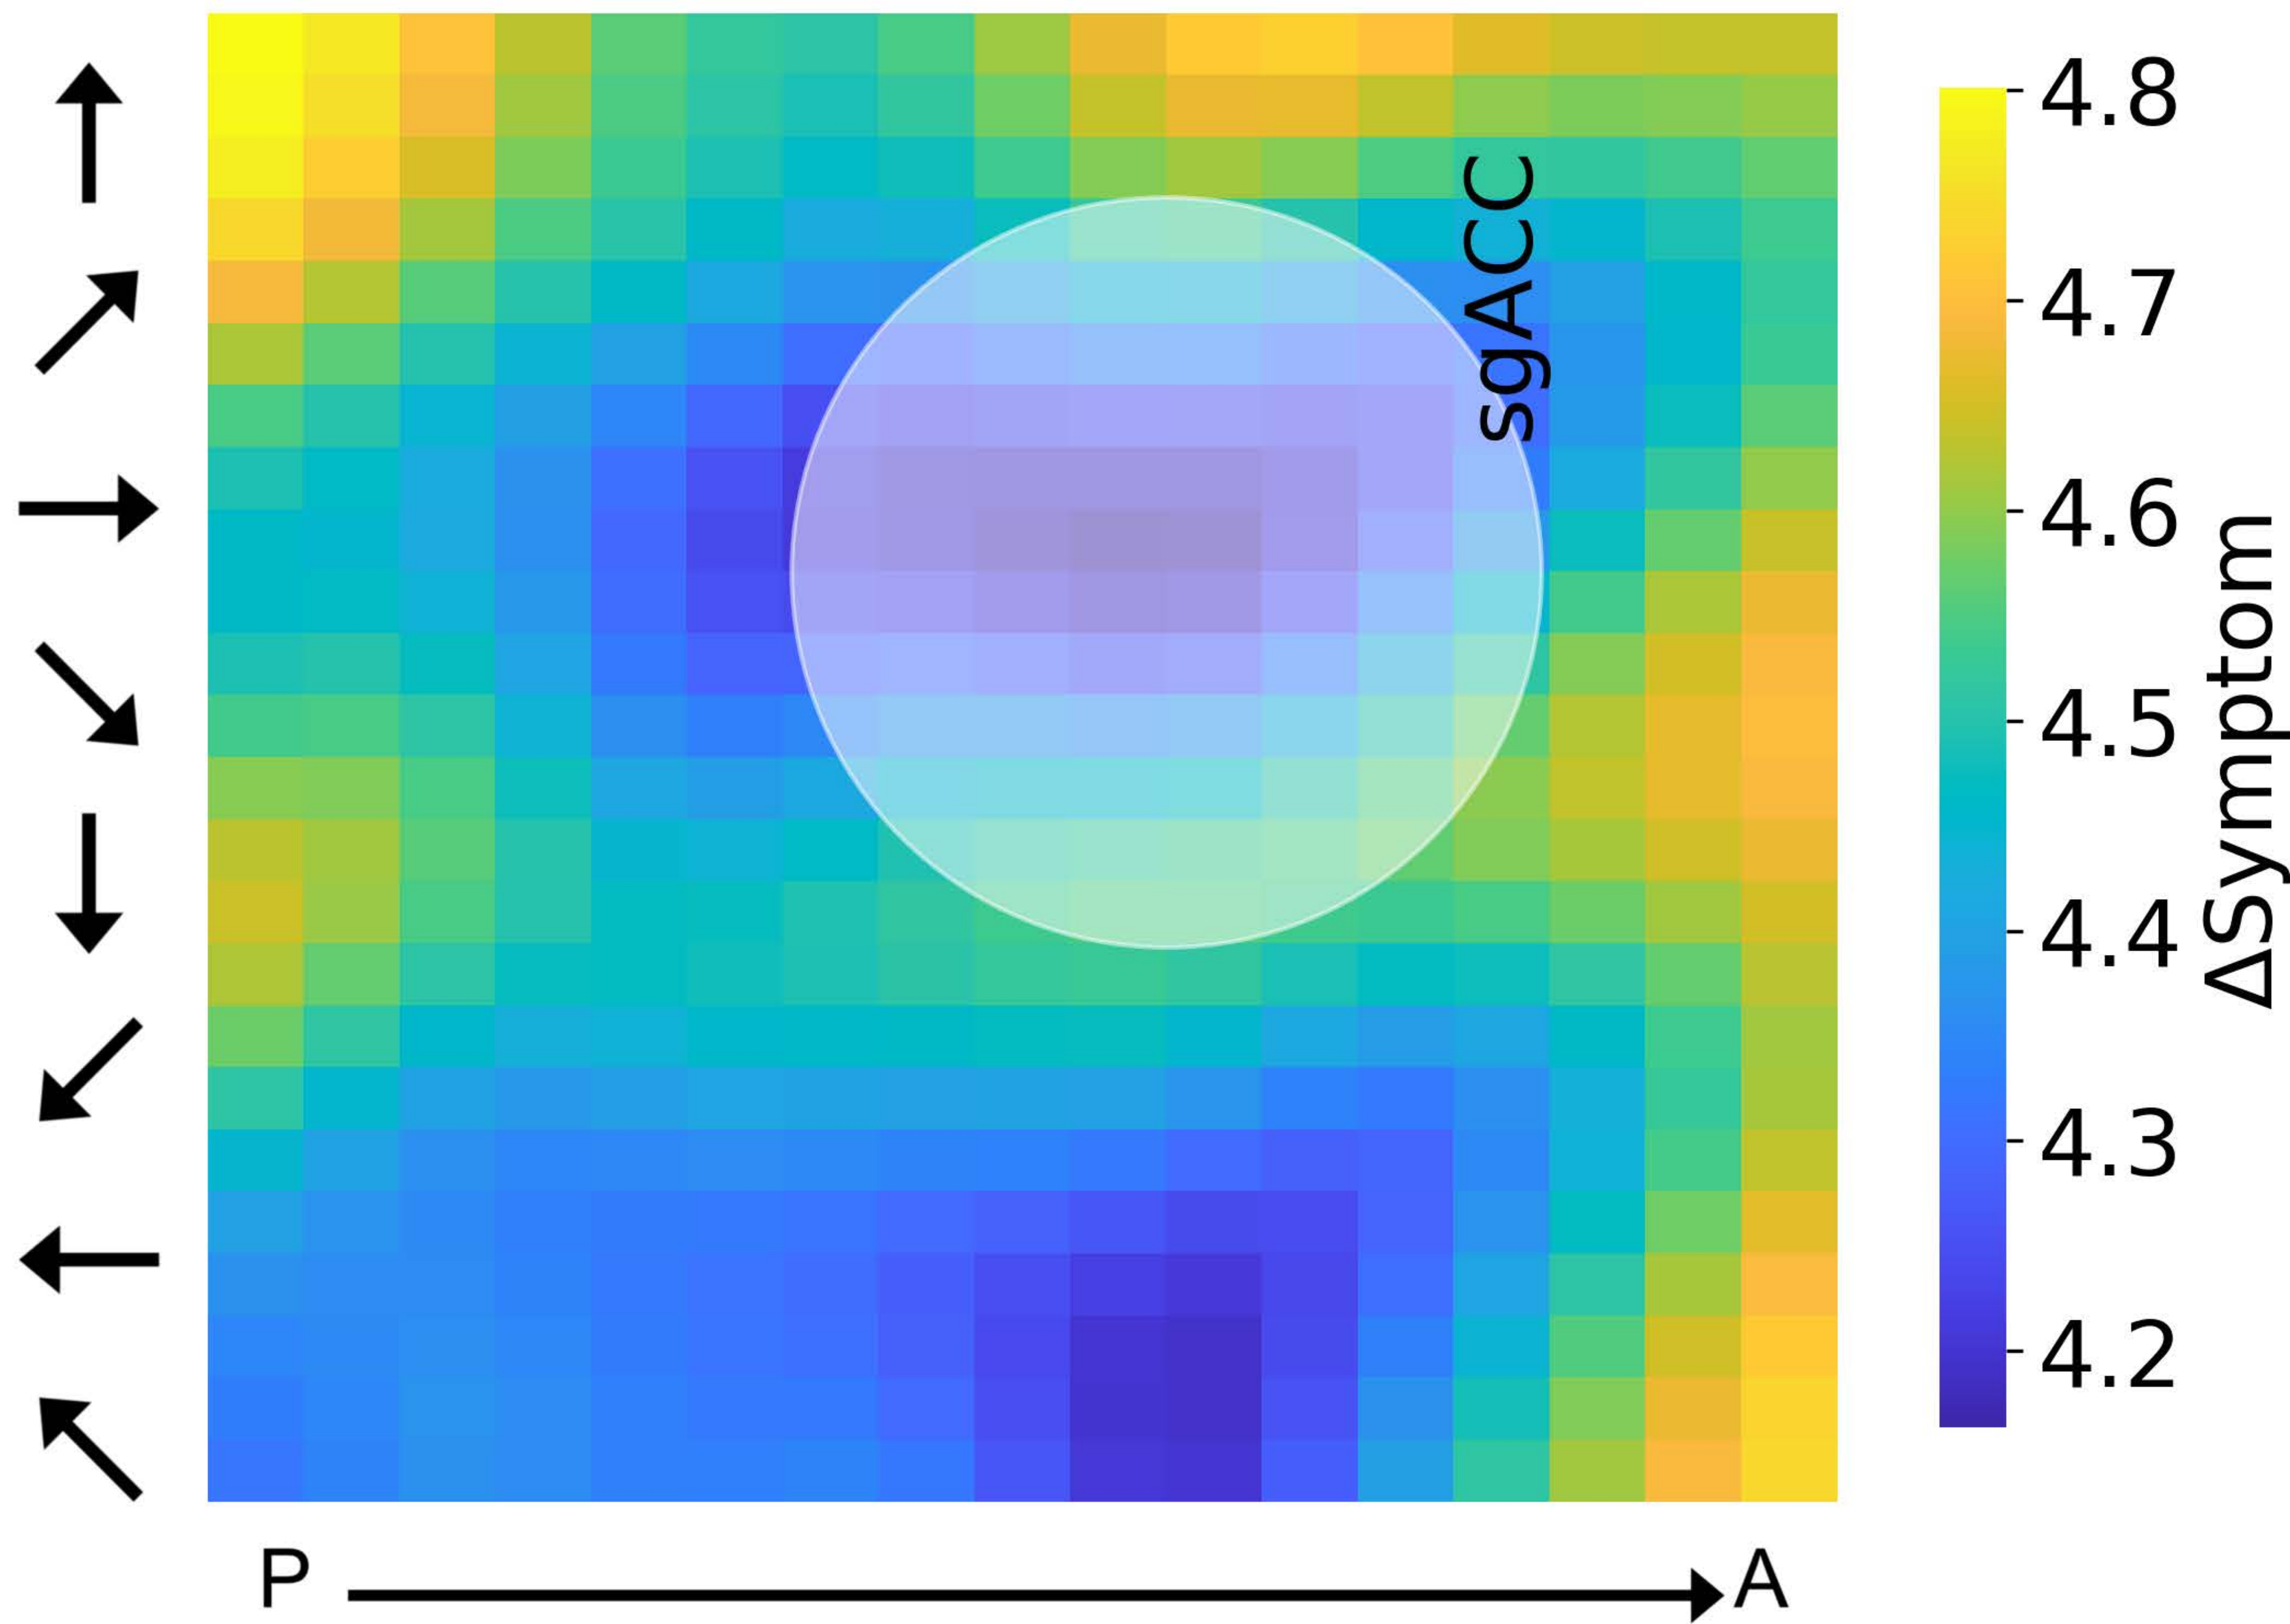



# INDARPT040EGR\_hamd\_right\_dlpfc

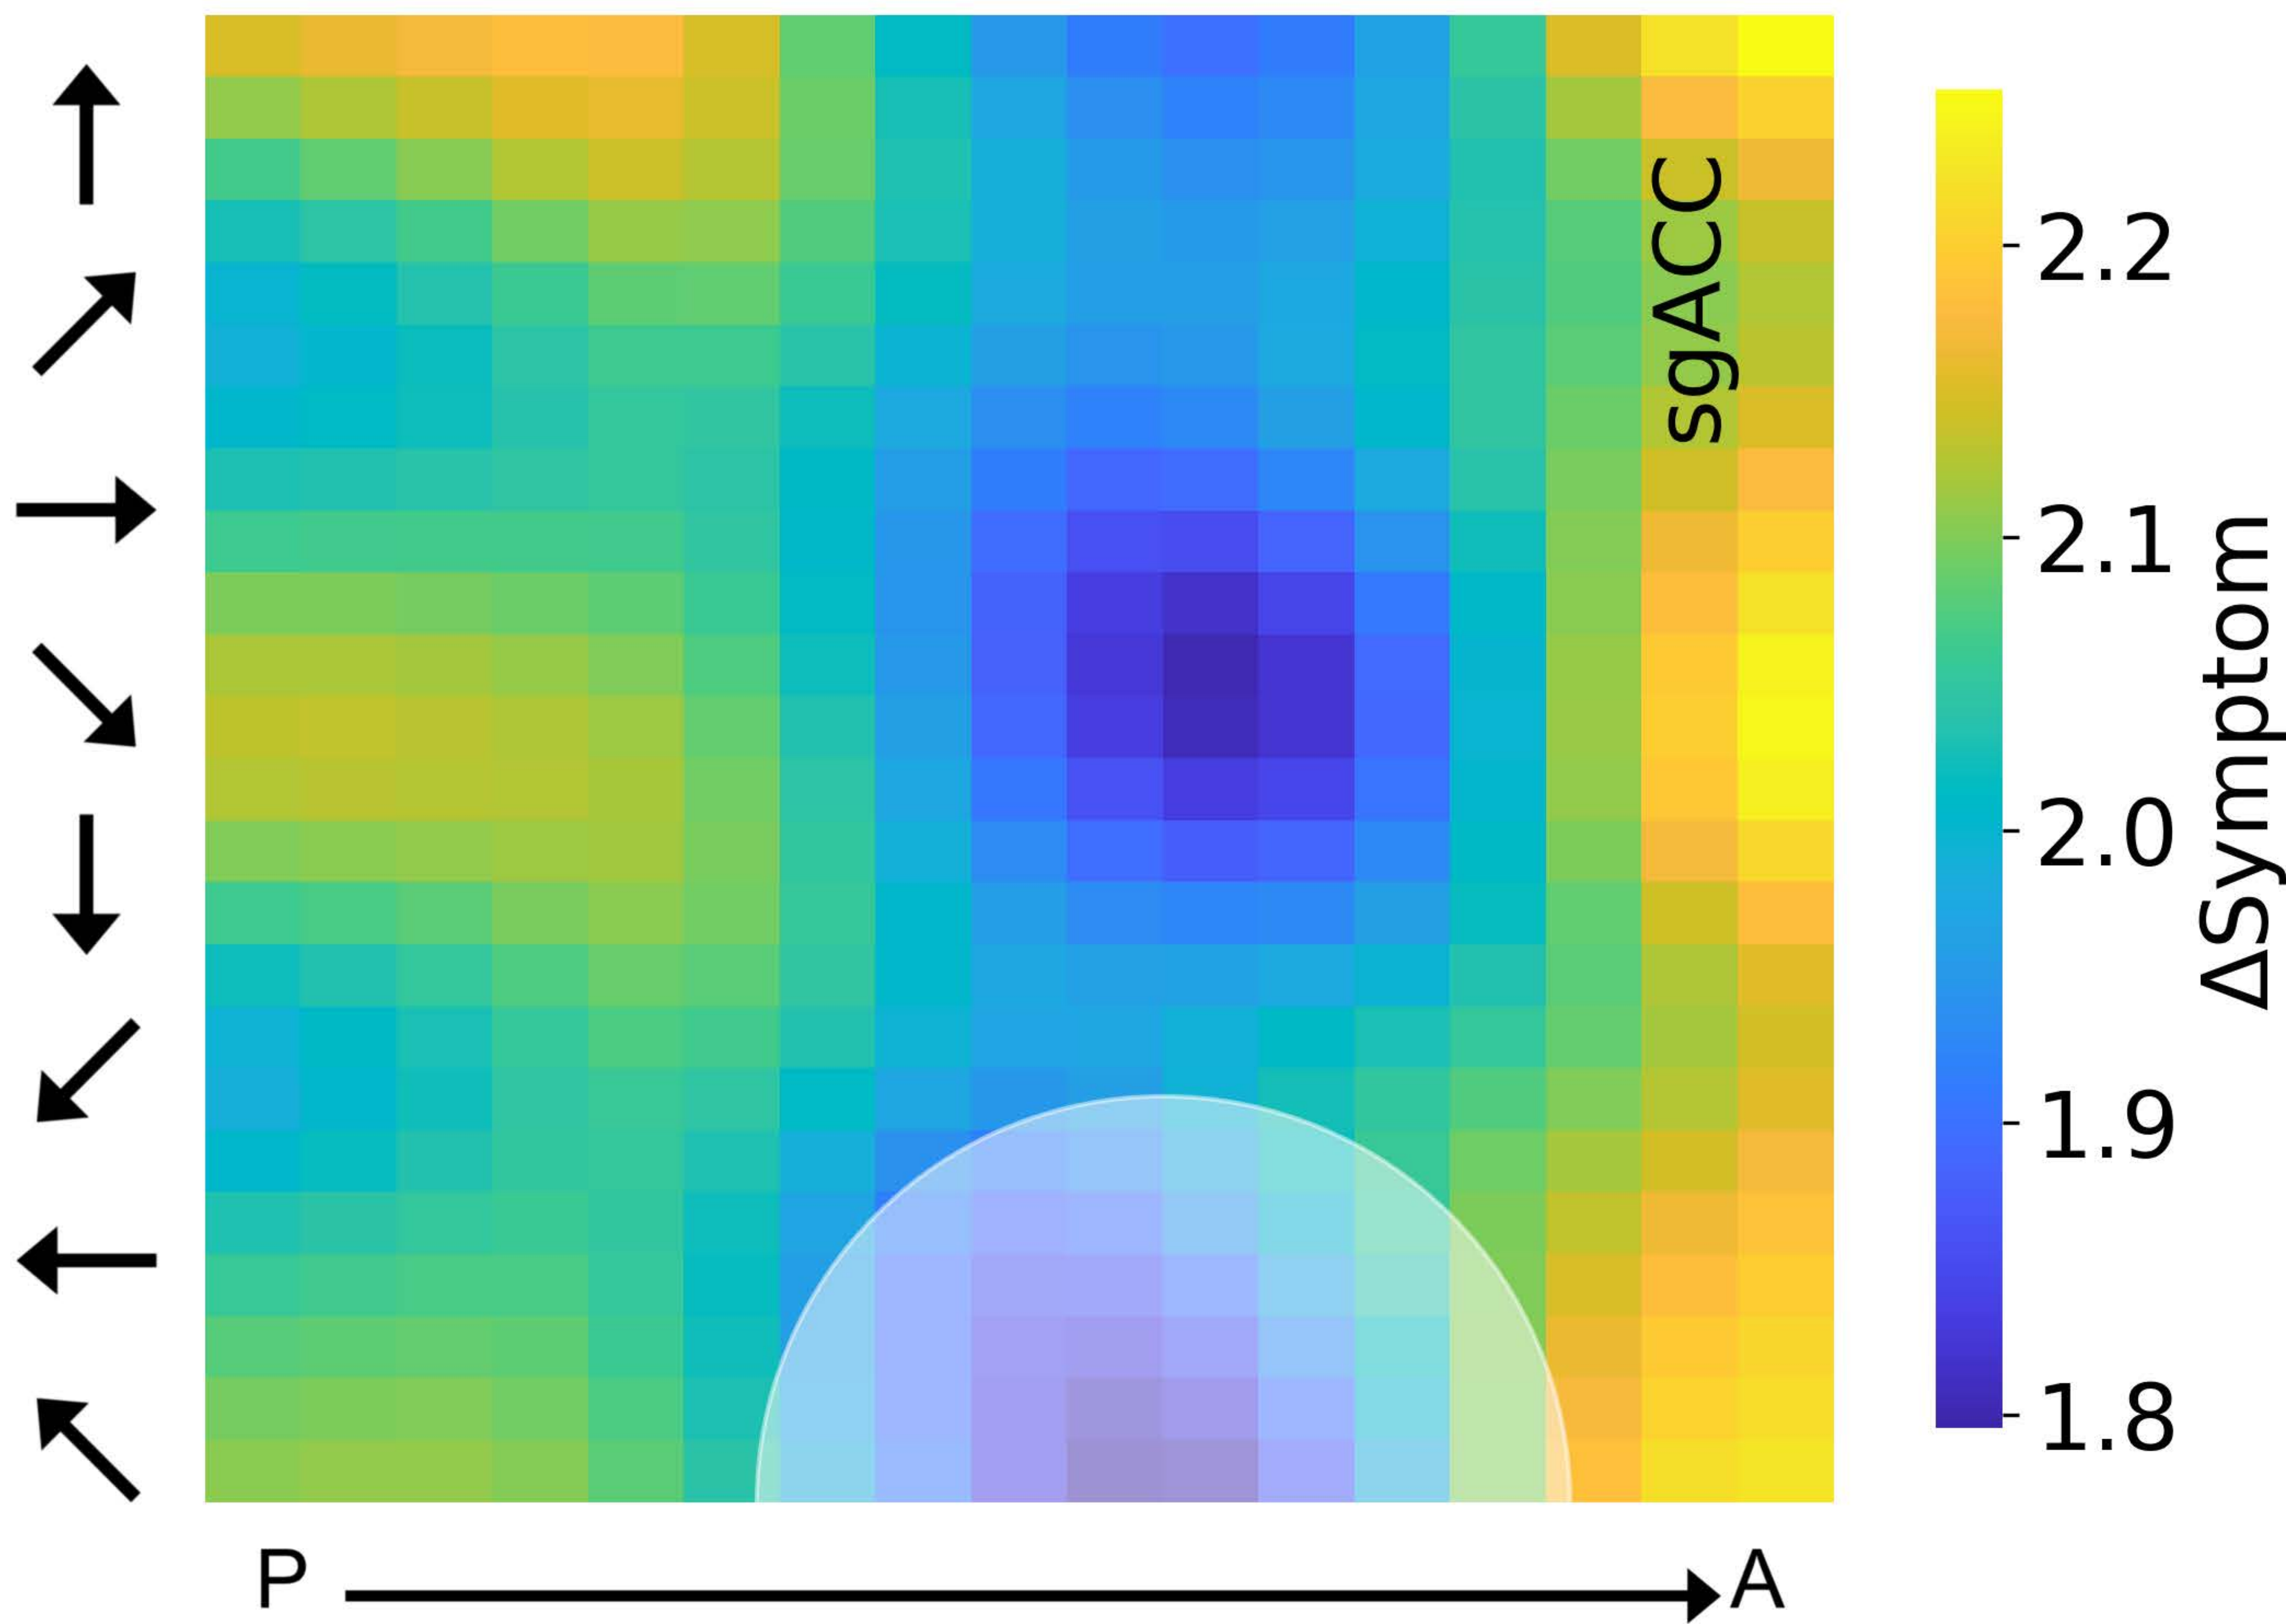



# INDARPW706YNA\_hamd\_right\_dlpfc

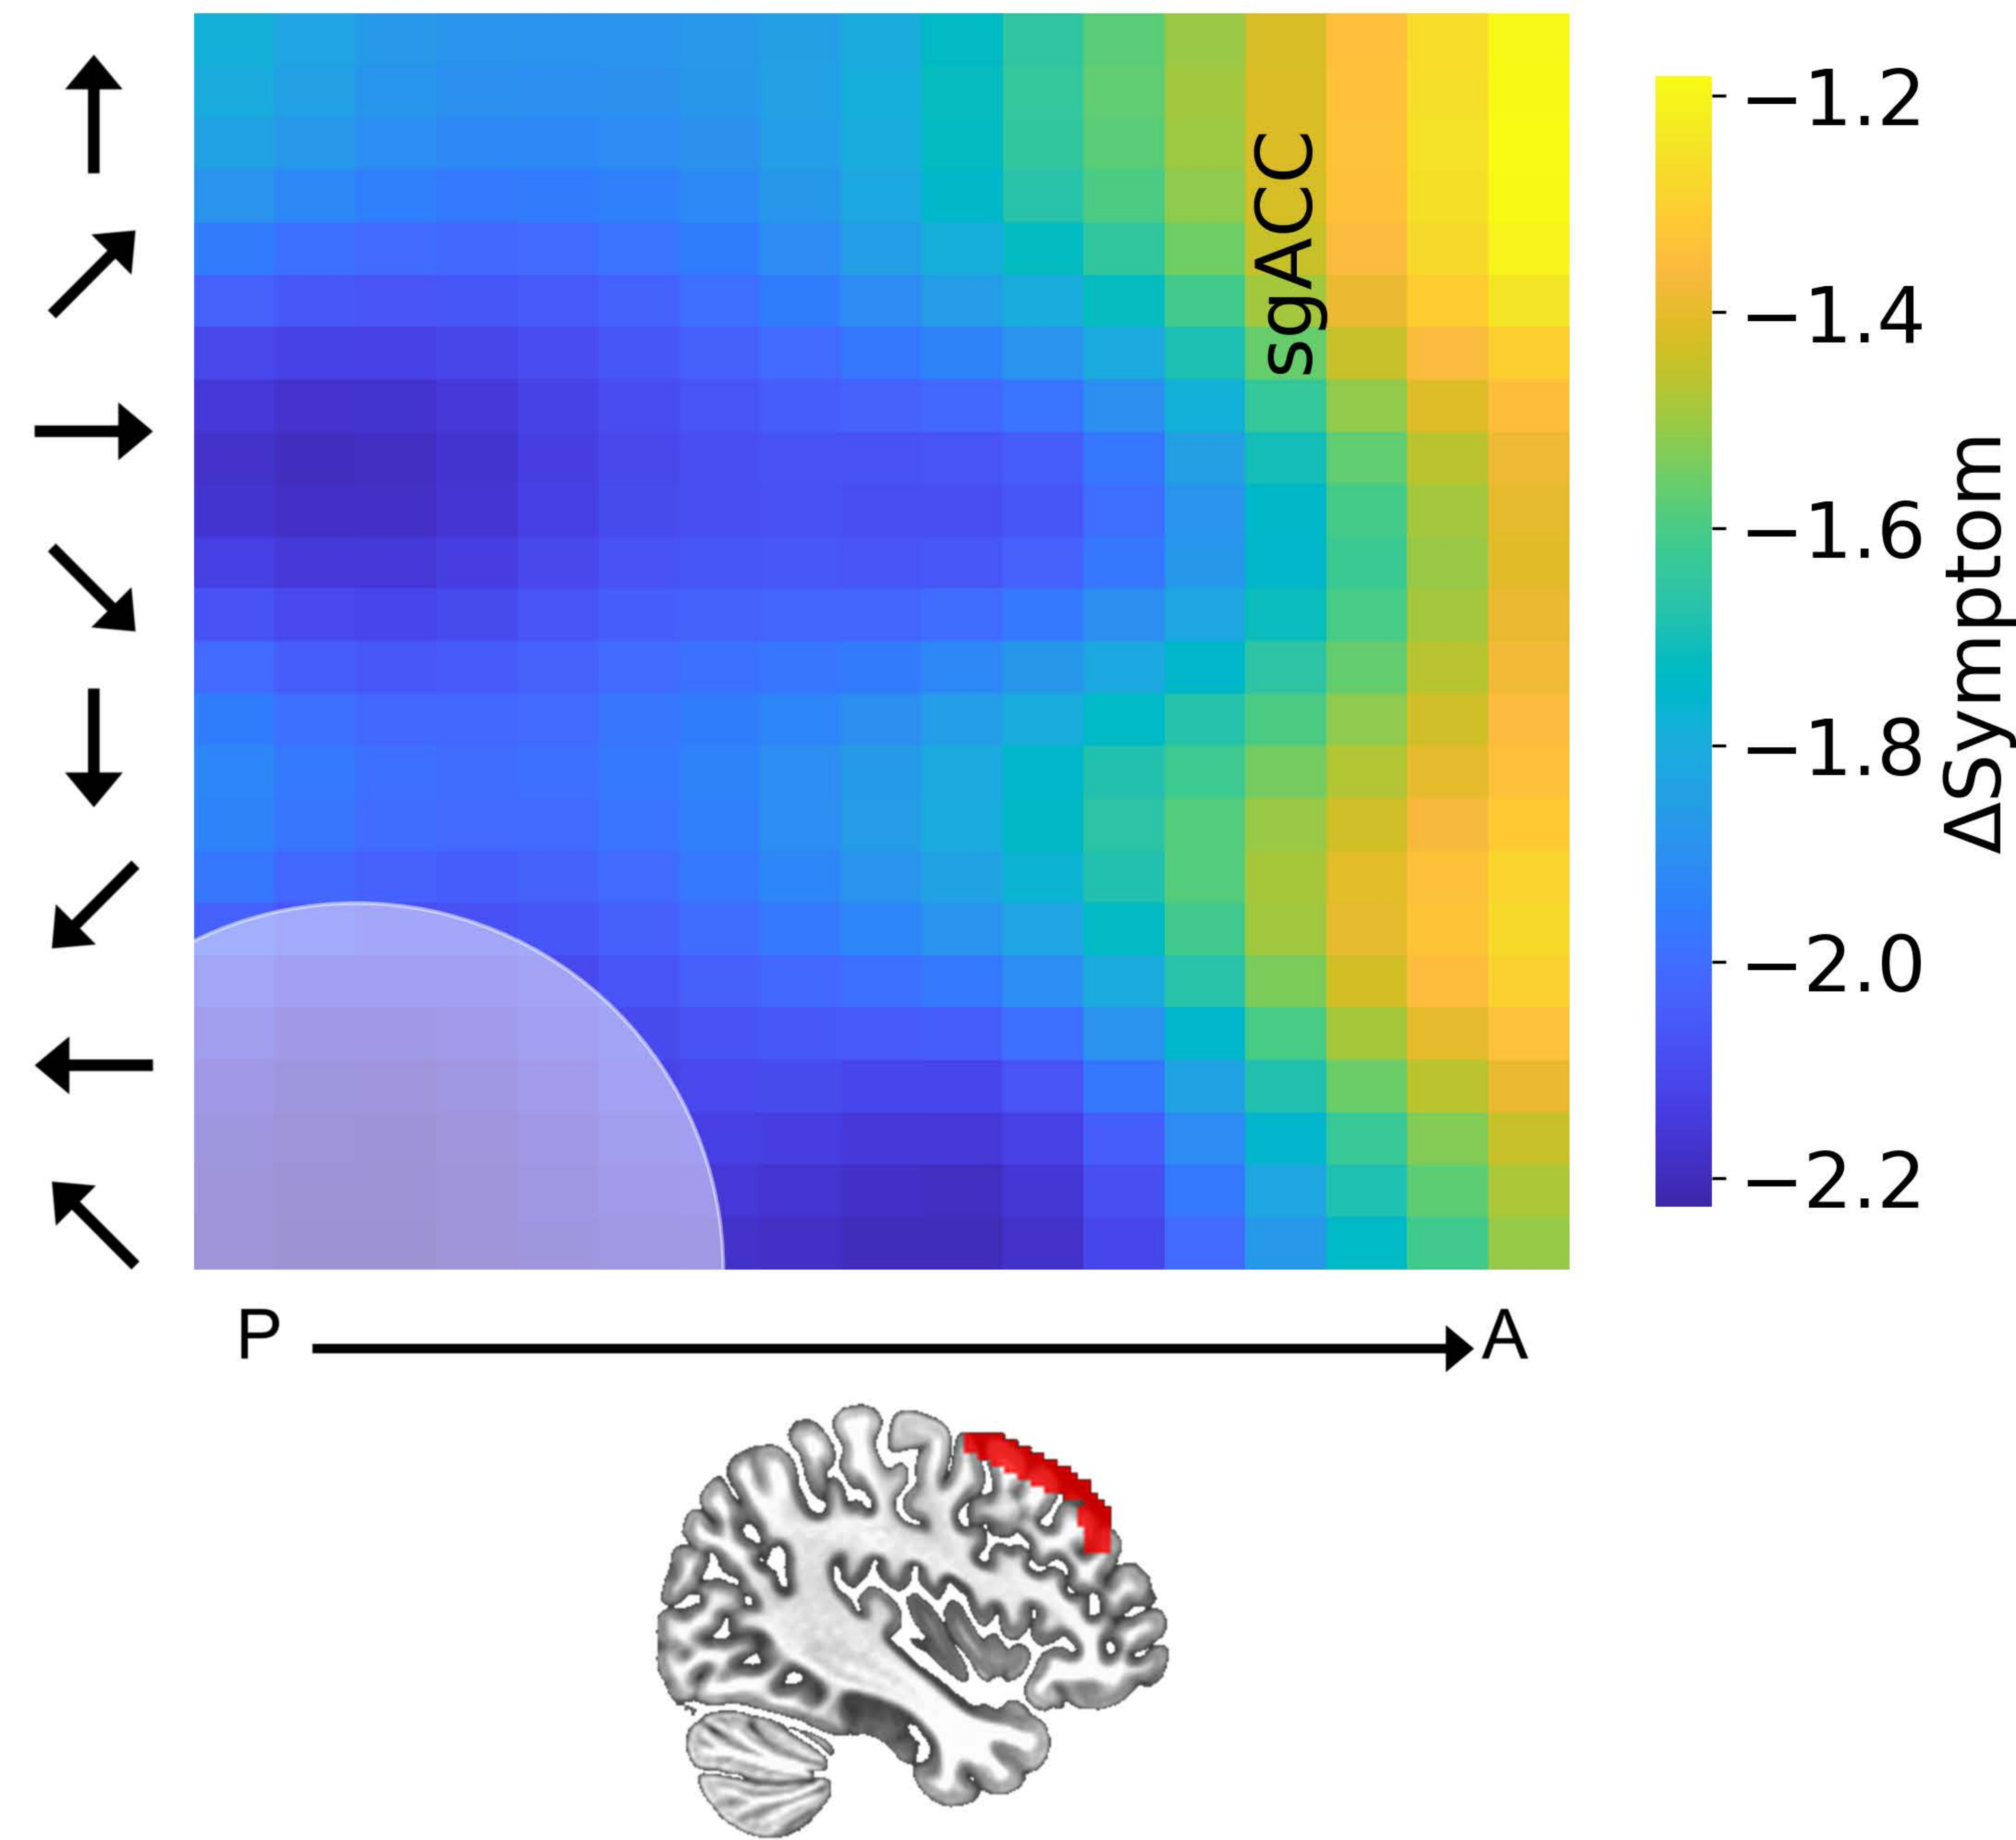



# INDARPZ537YY0\_hamd\_right\_dlpfc

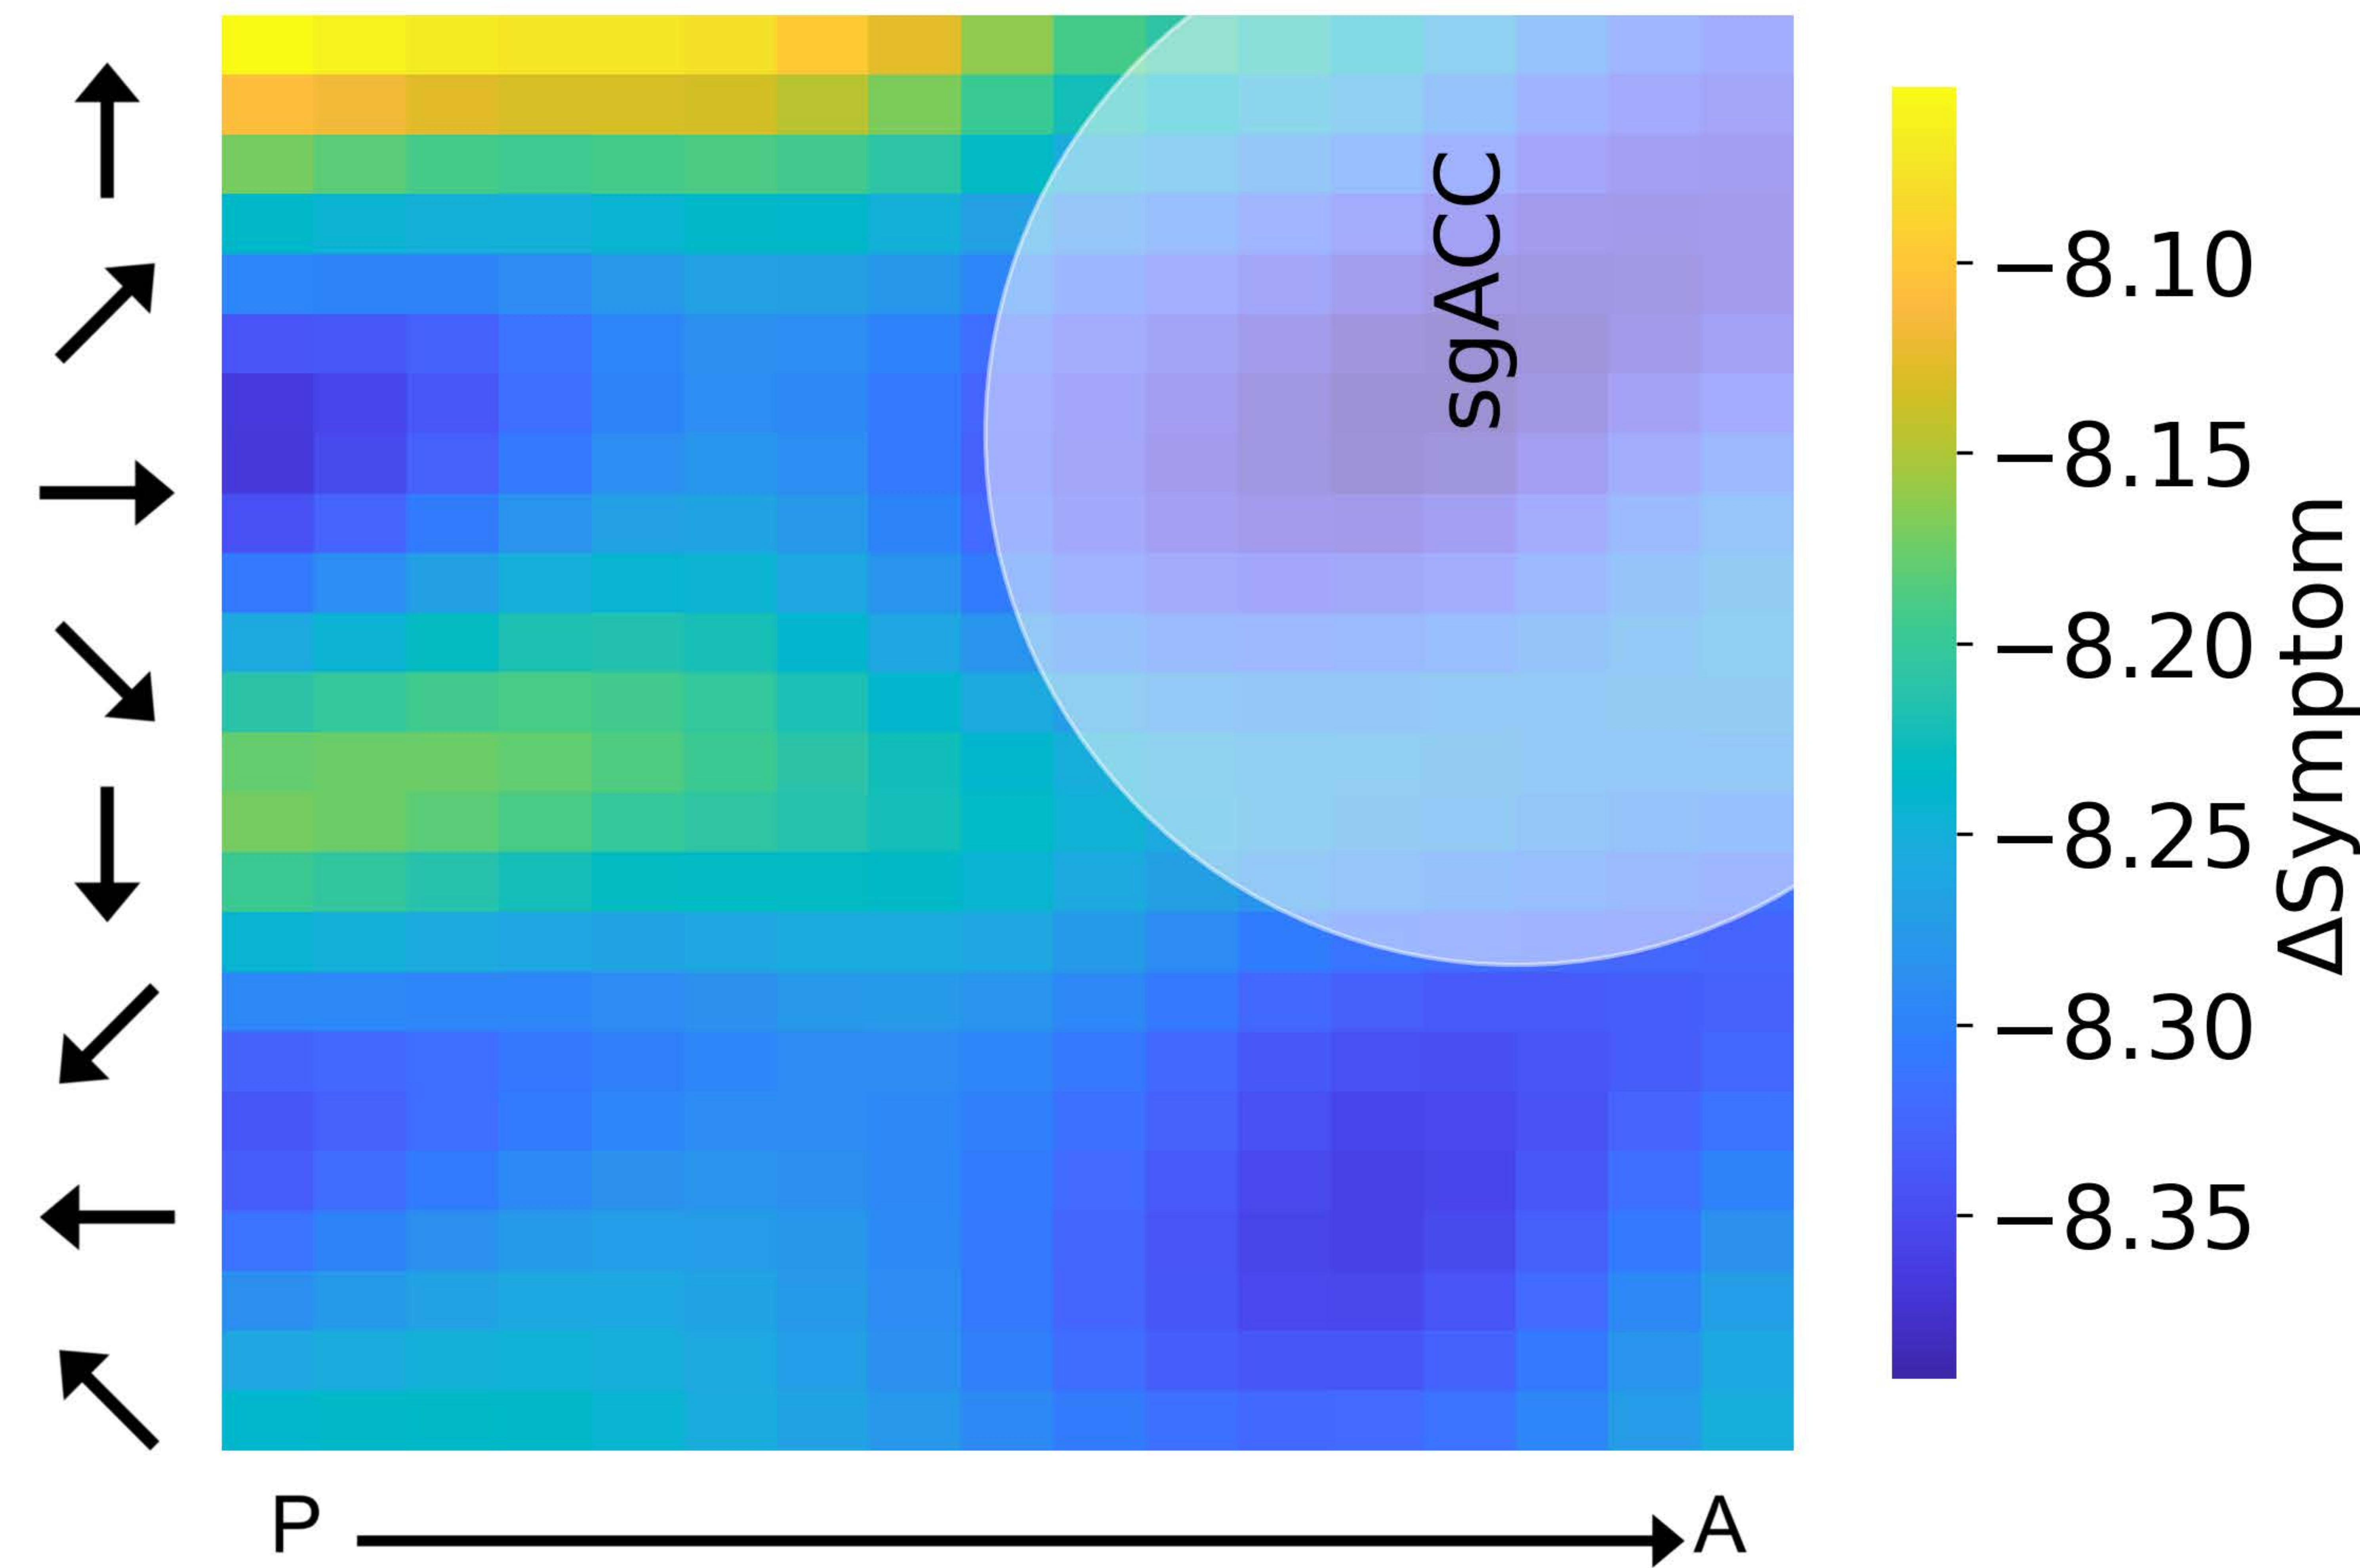



# INDARRRD55DDH\_hamd\_right\_dlpfc

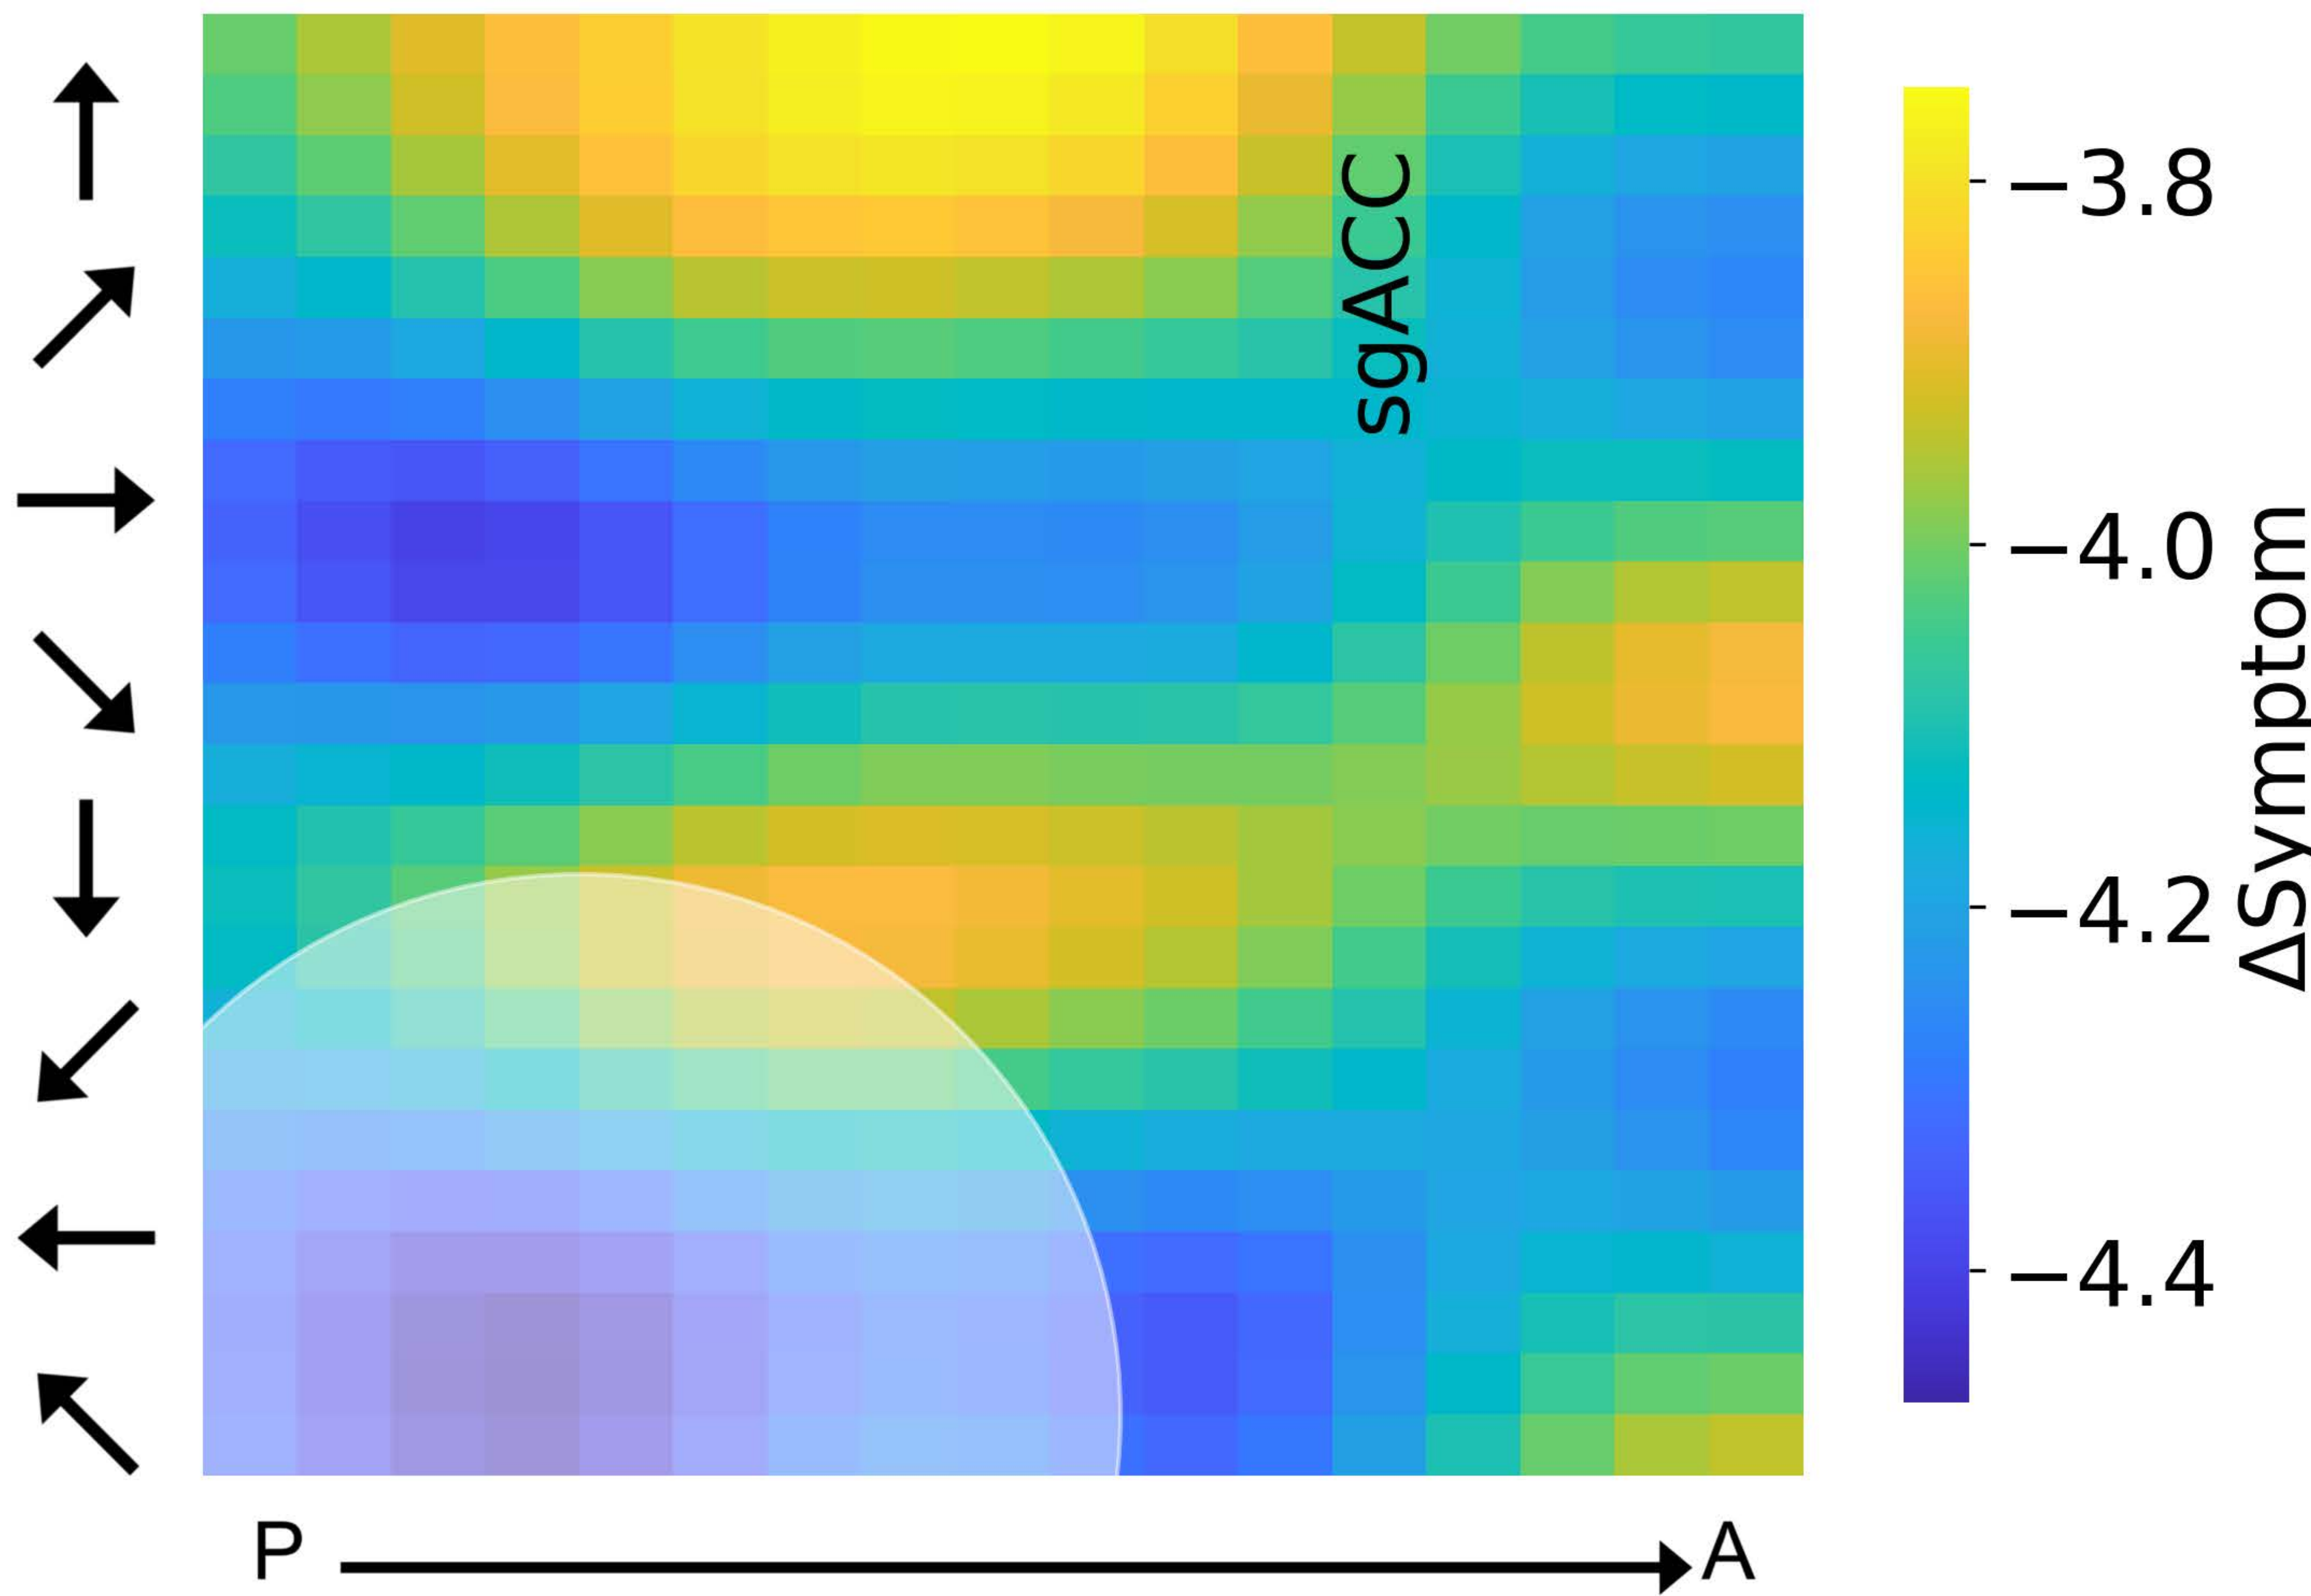



# NDARRRF879TA3\_hamd\_right\_dlpfc

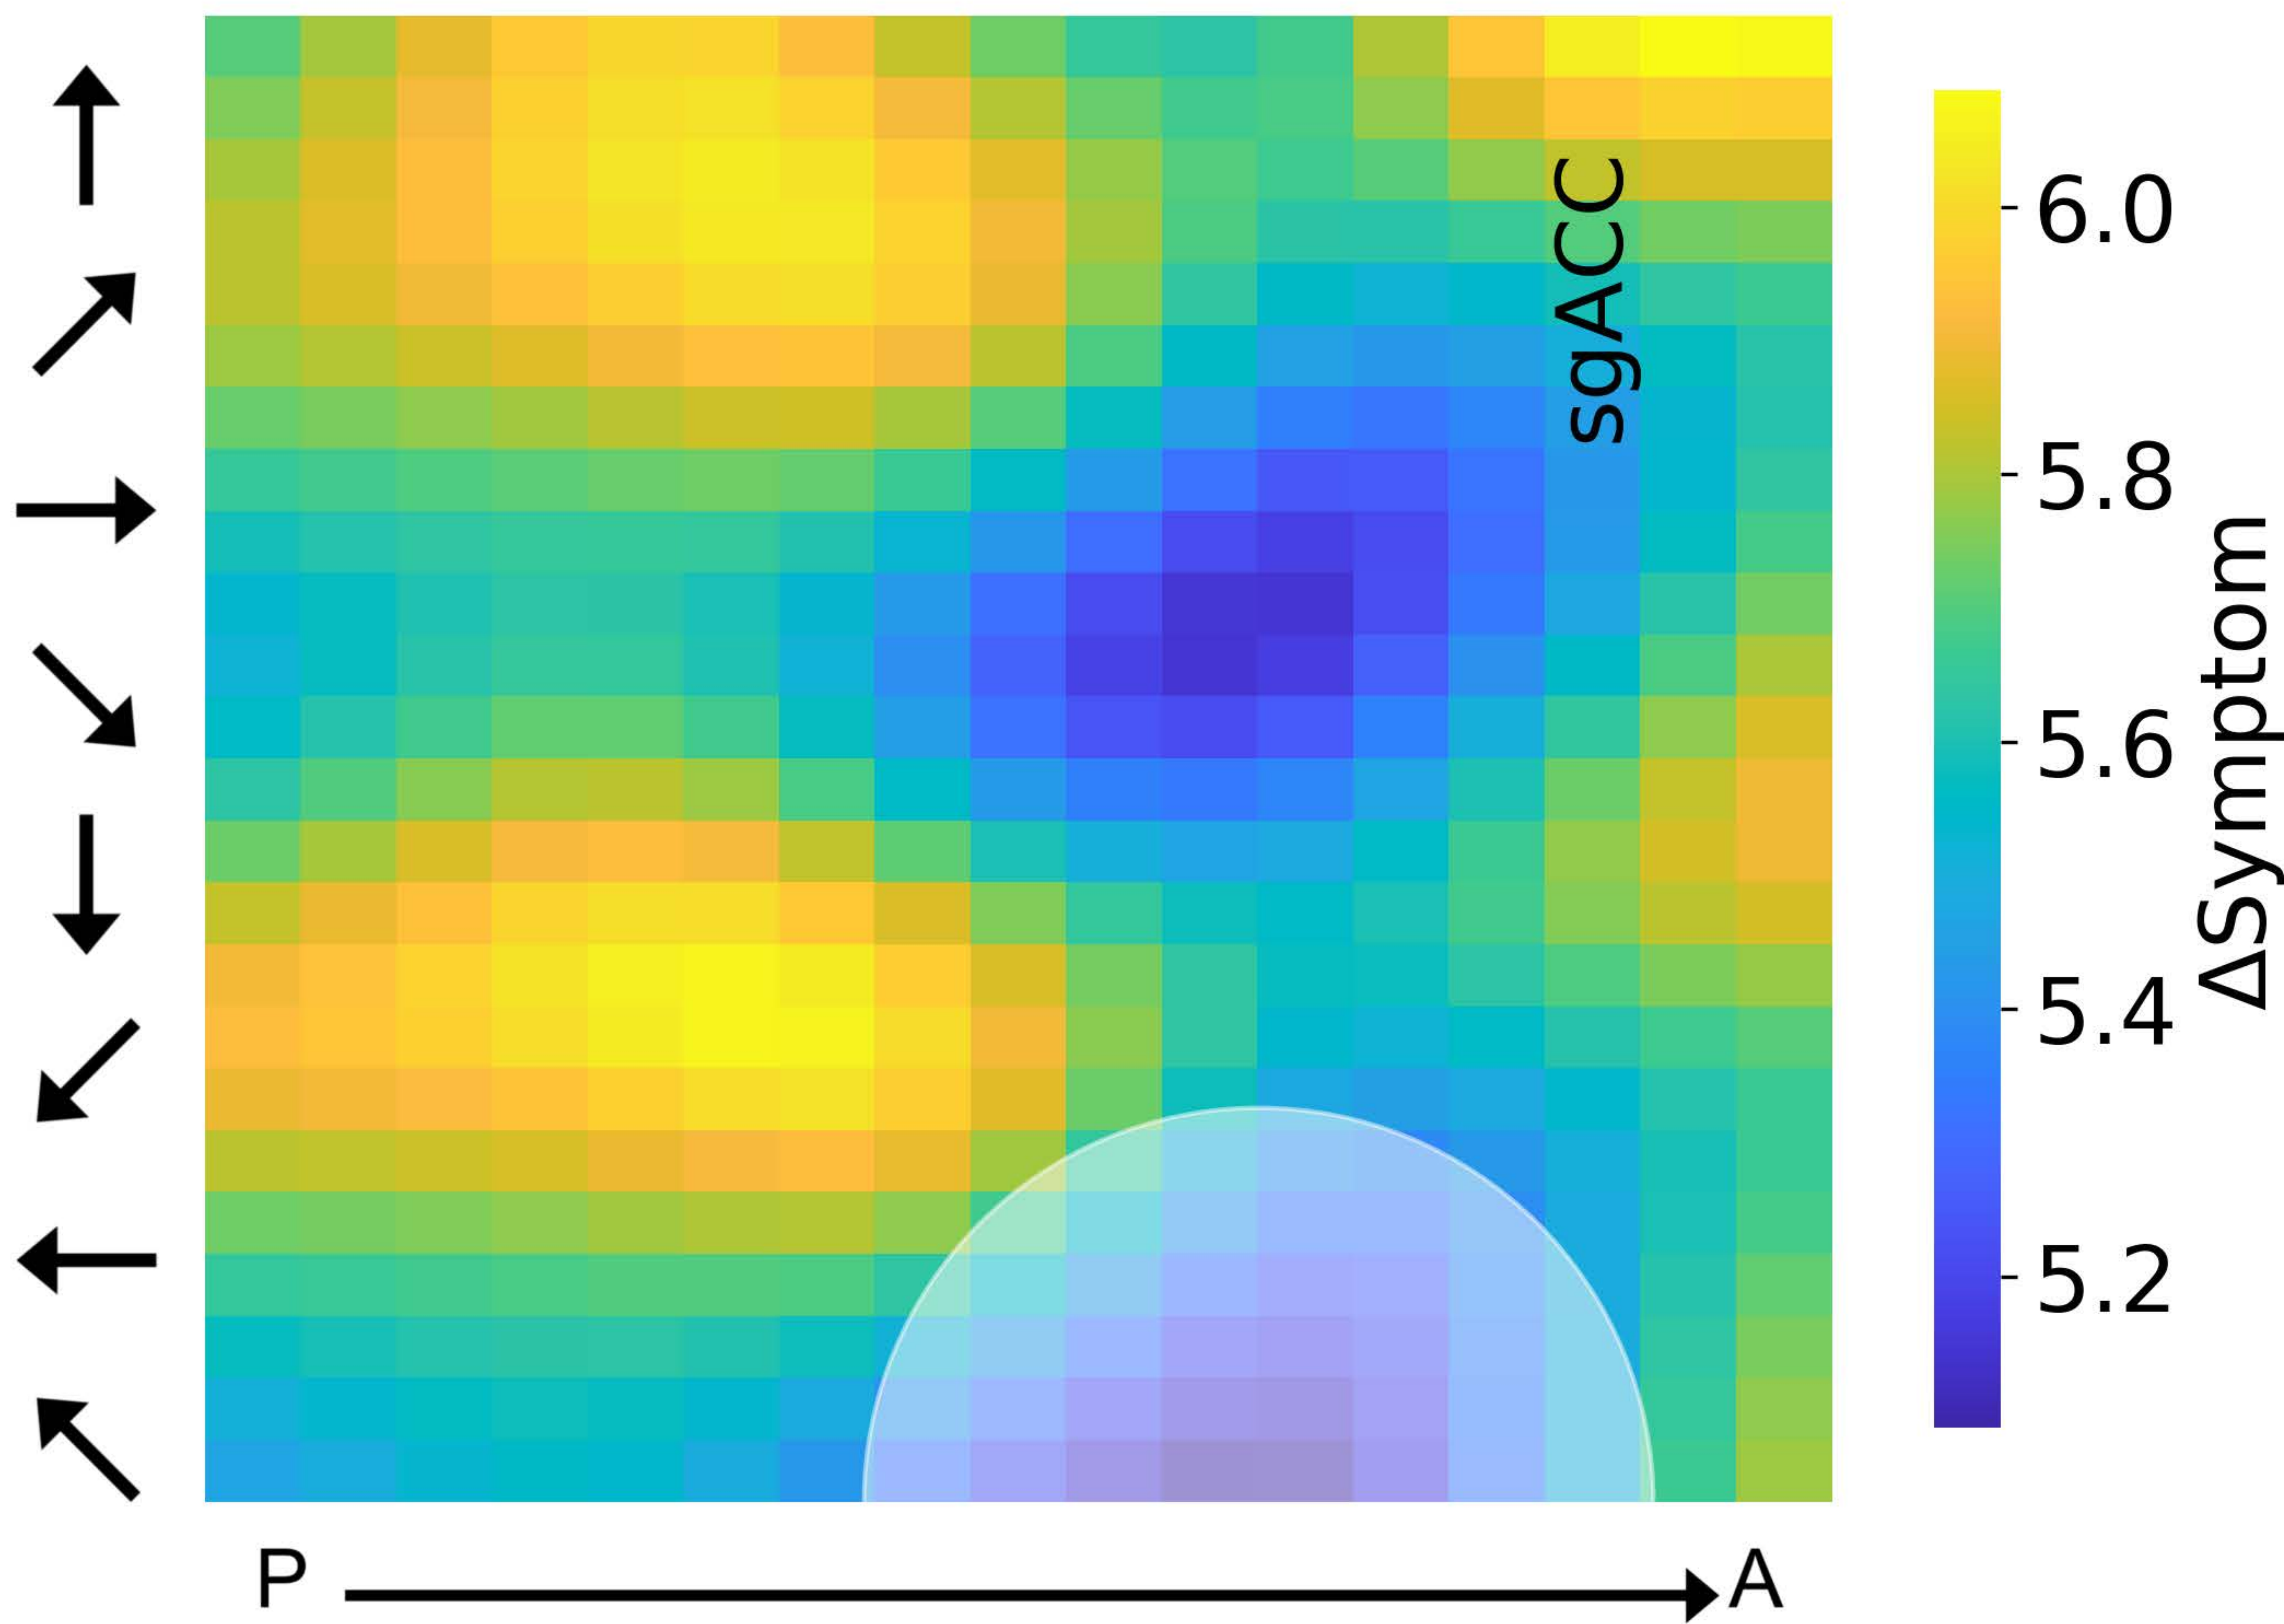



# NDARRRG943WGE\_hamd\_right\_dlpfc

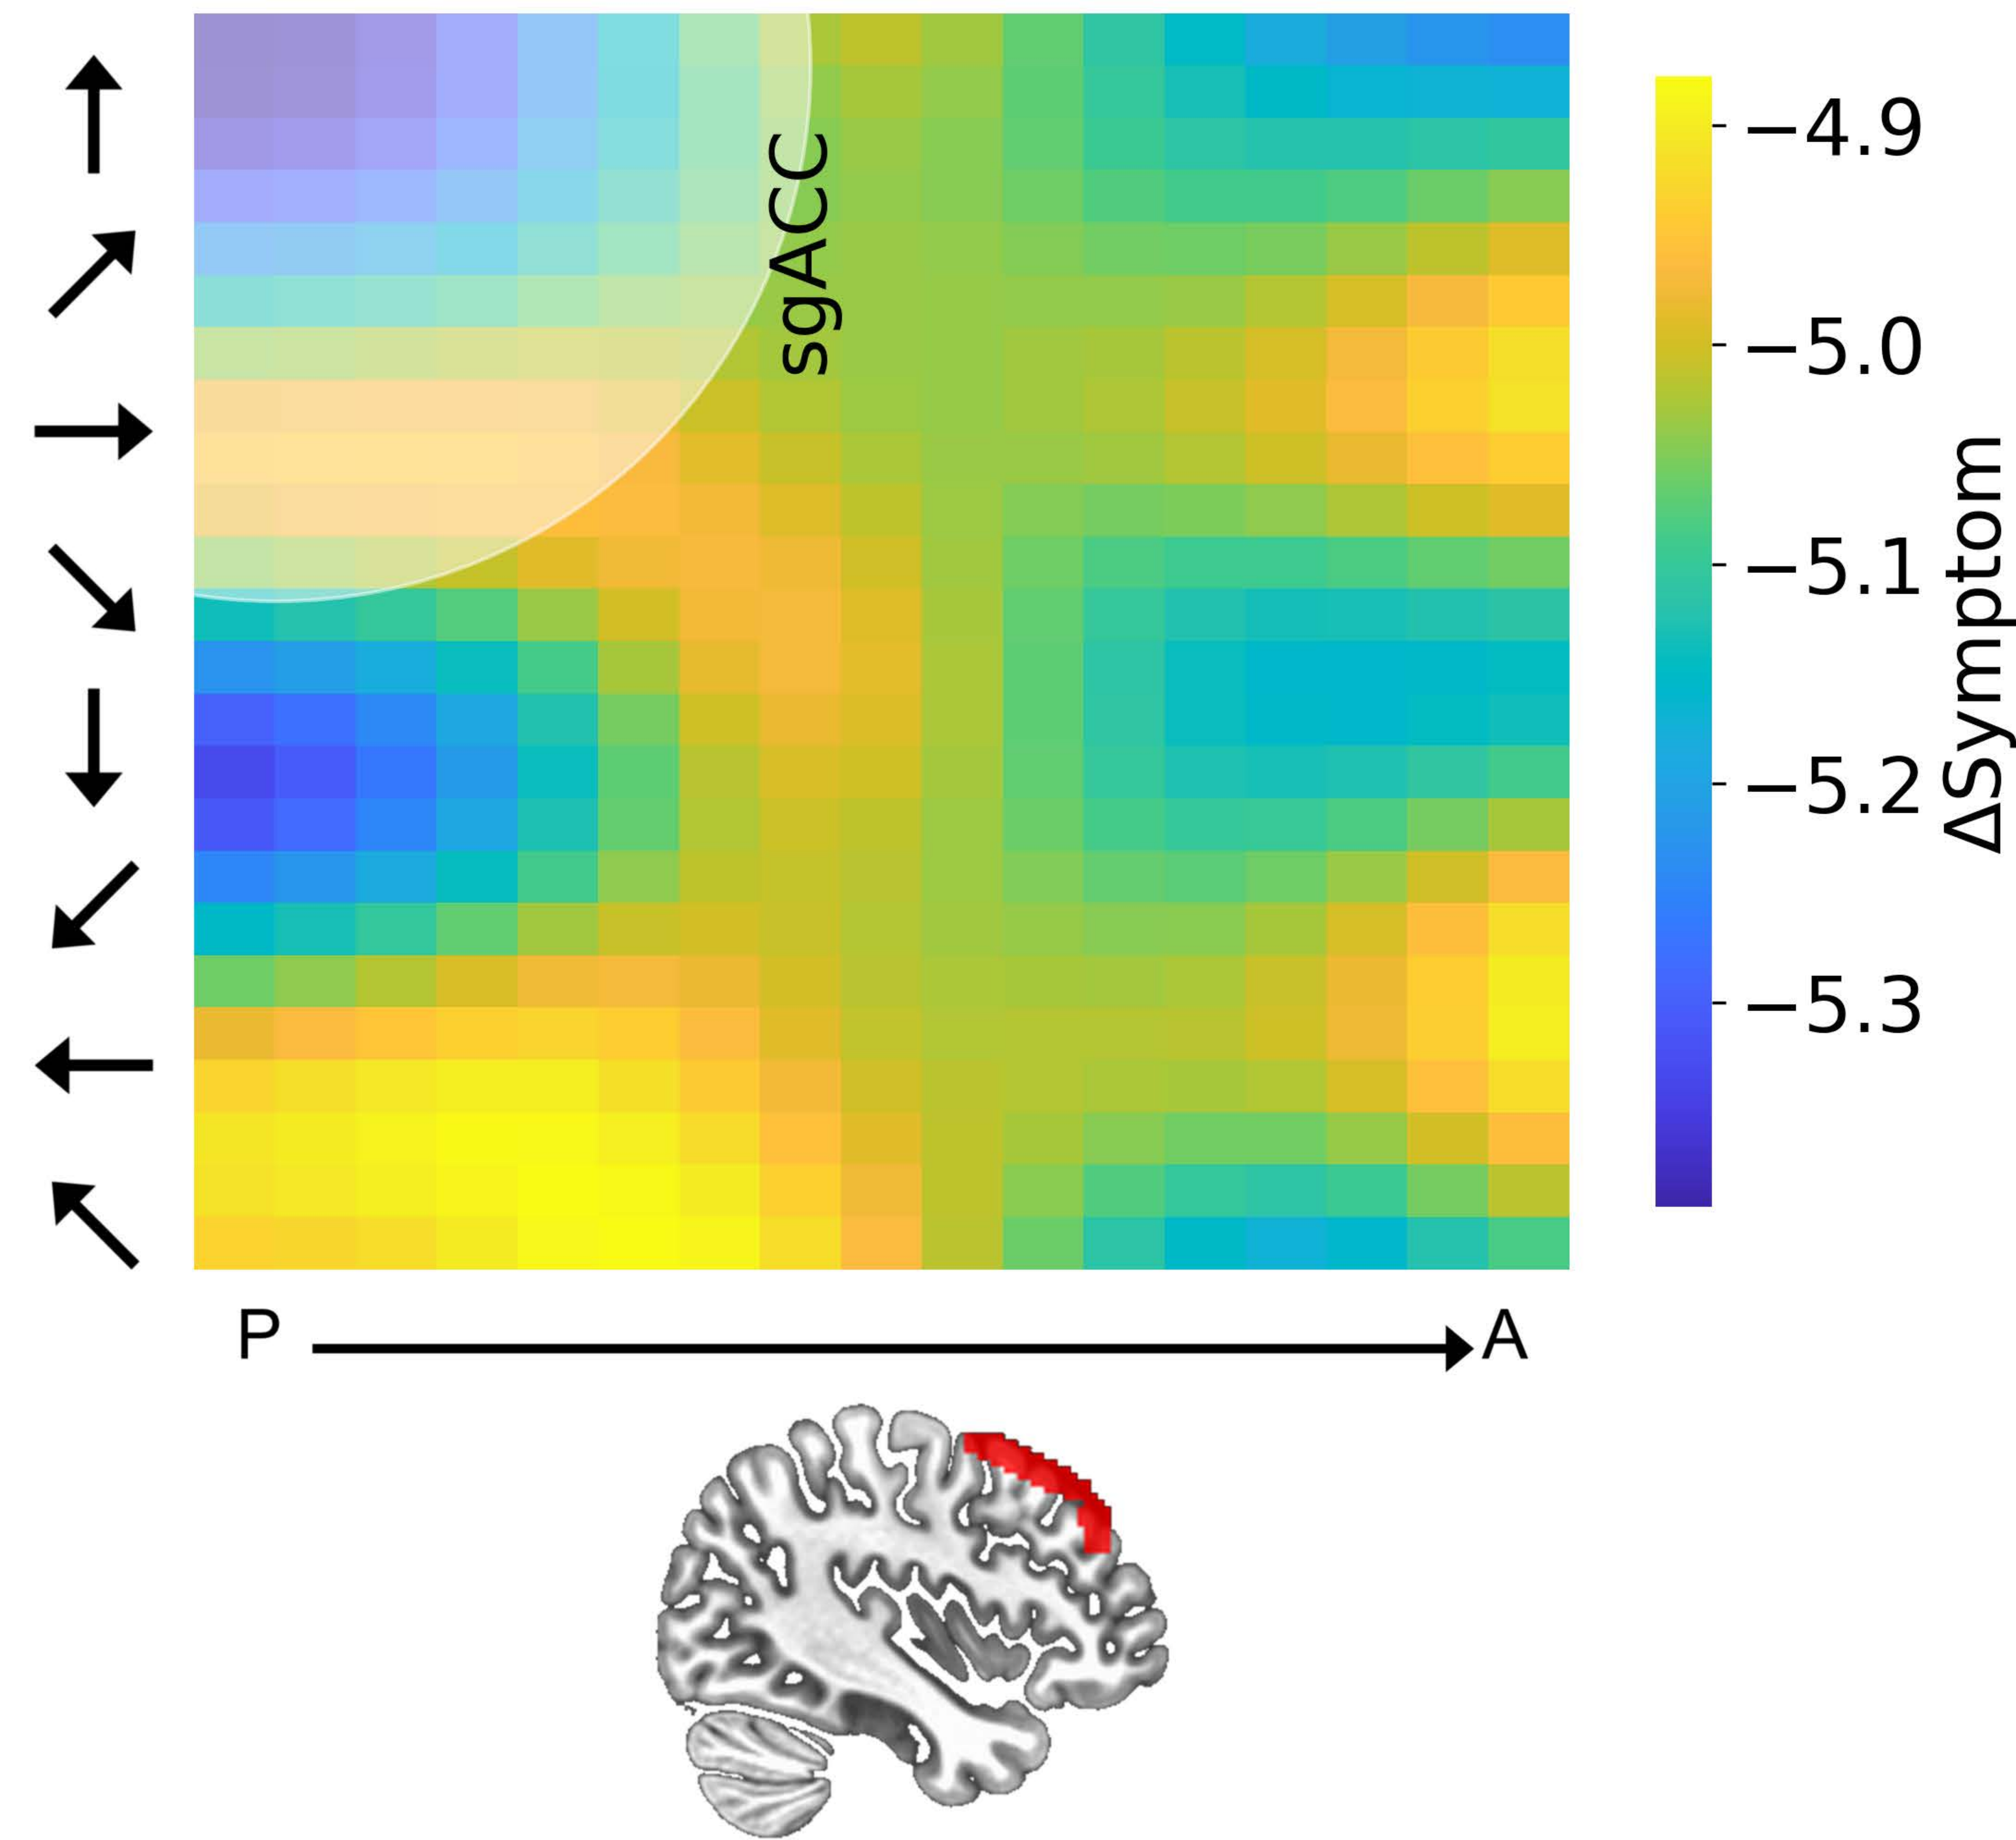



# NDARRRM328EP8\_hamd\_right\_dlpfc

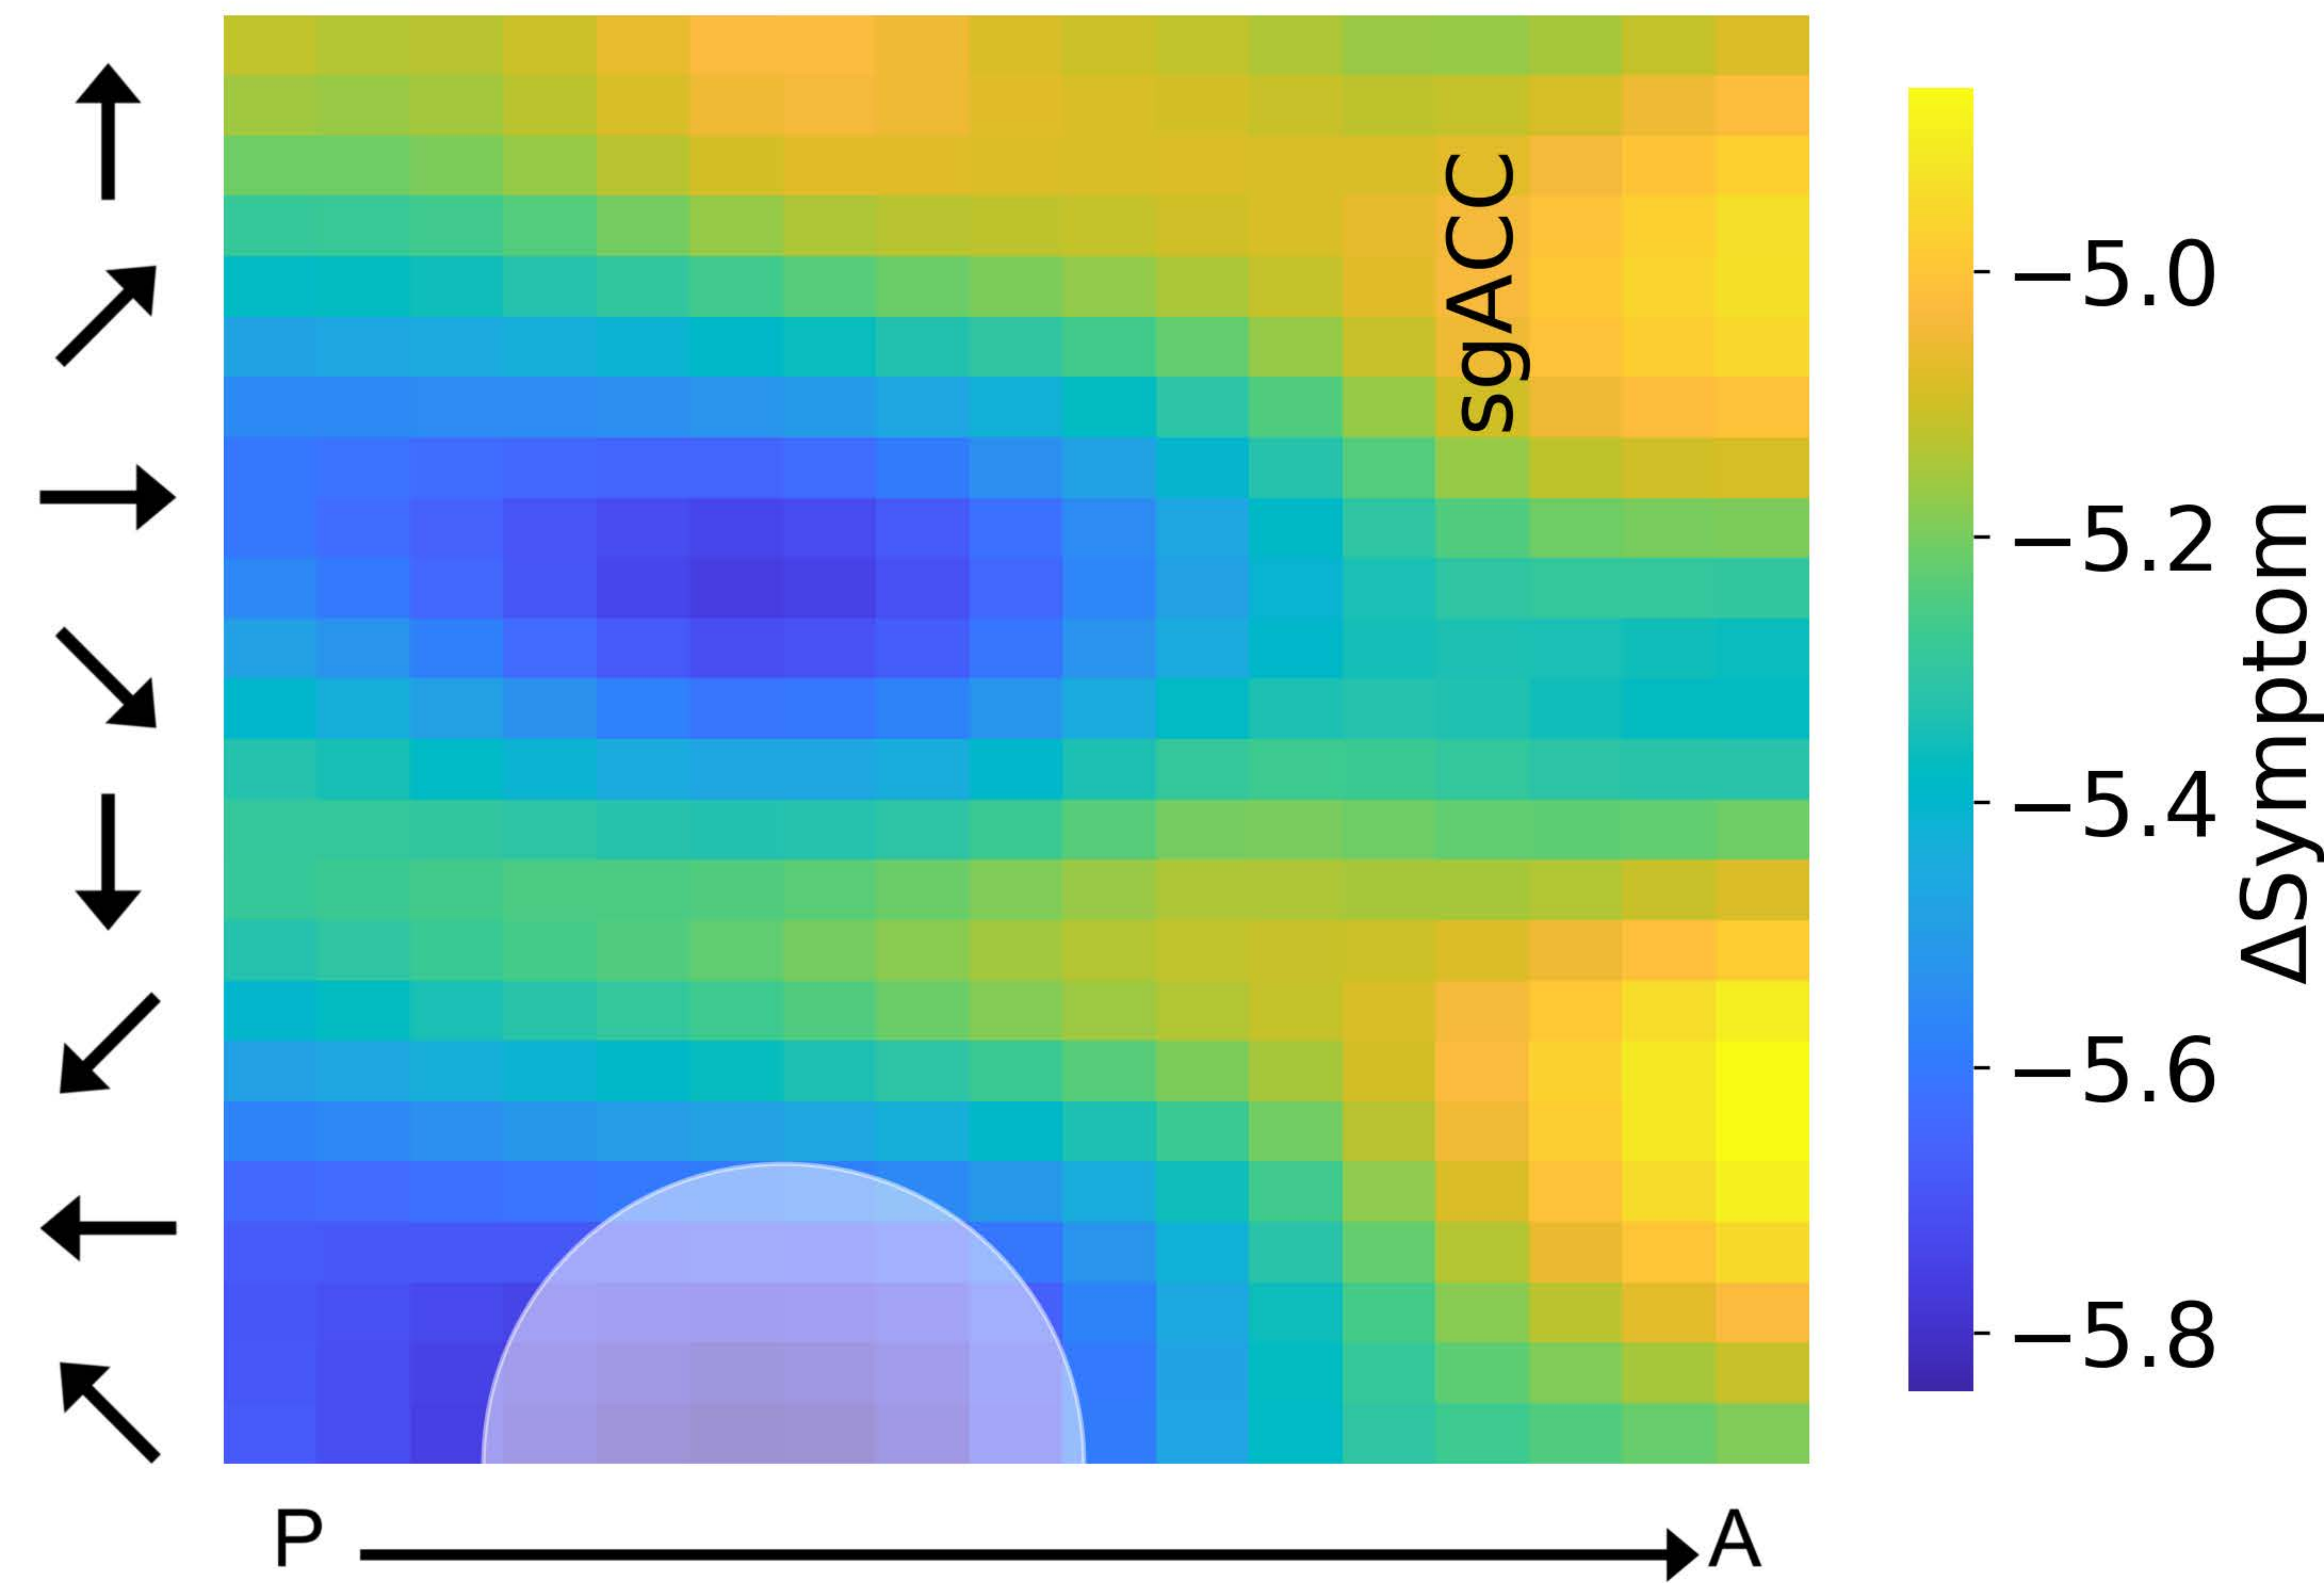



# NDARRRZ612NKG\_hamd\_right\_dlpfc

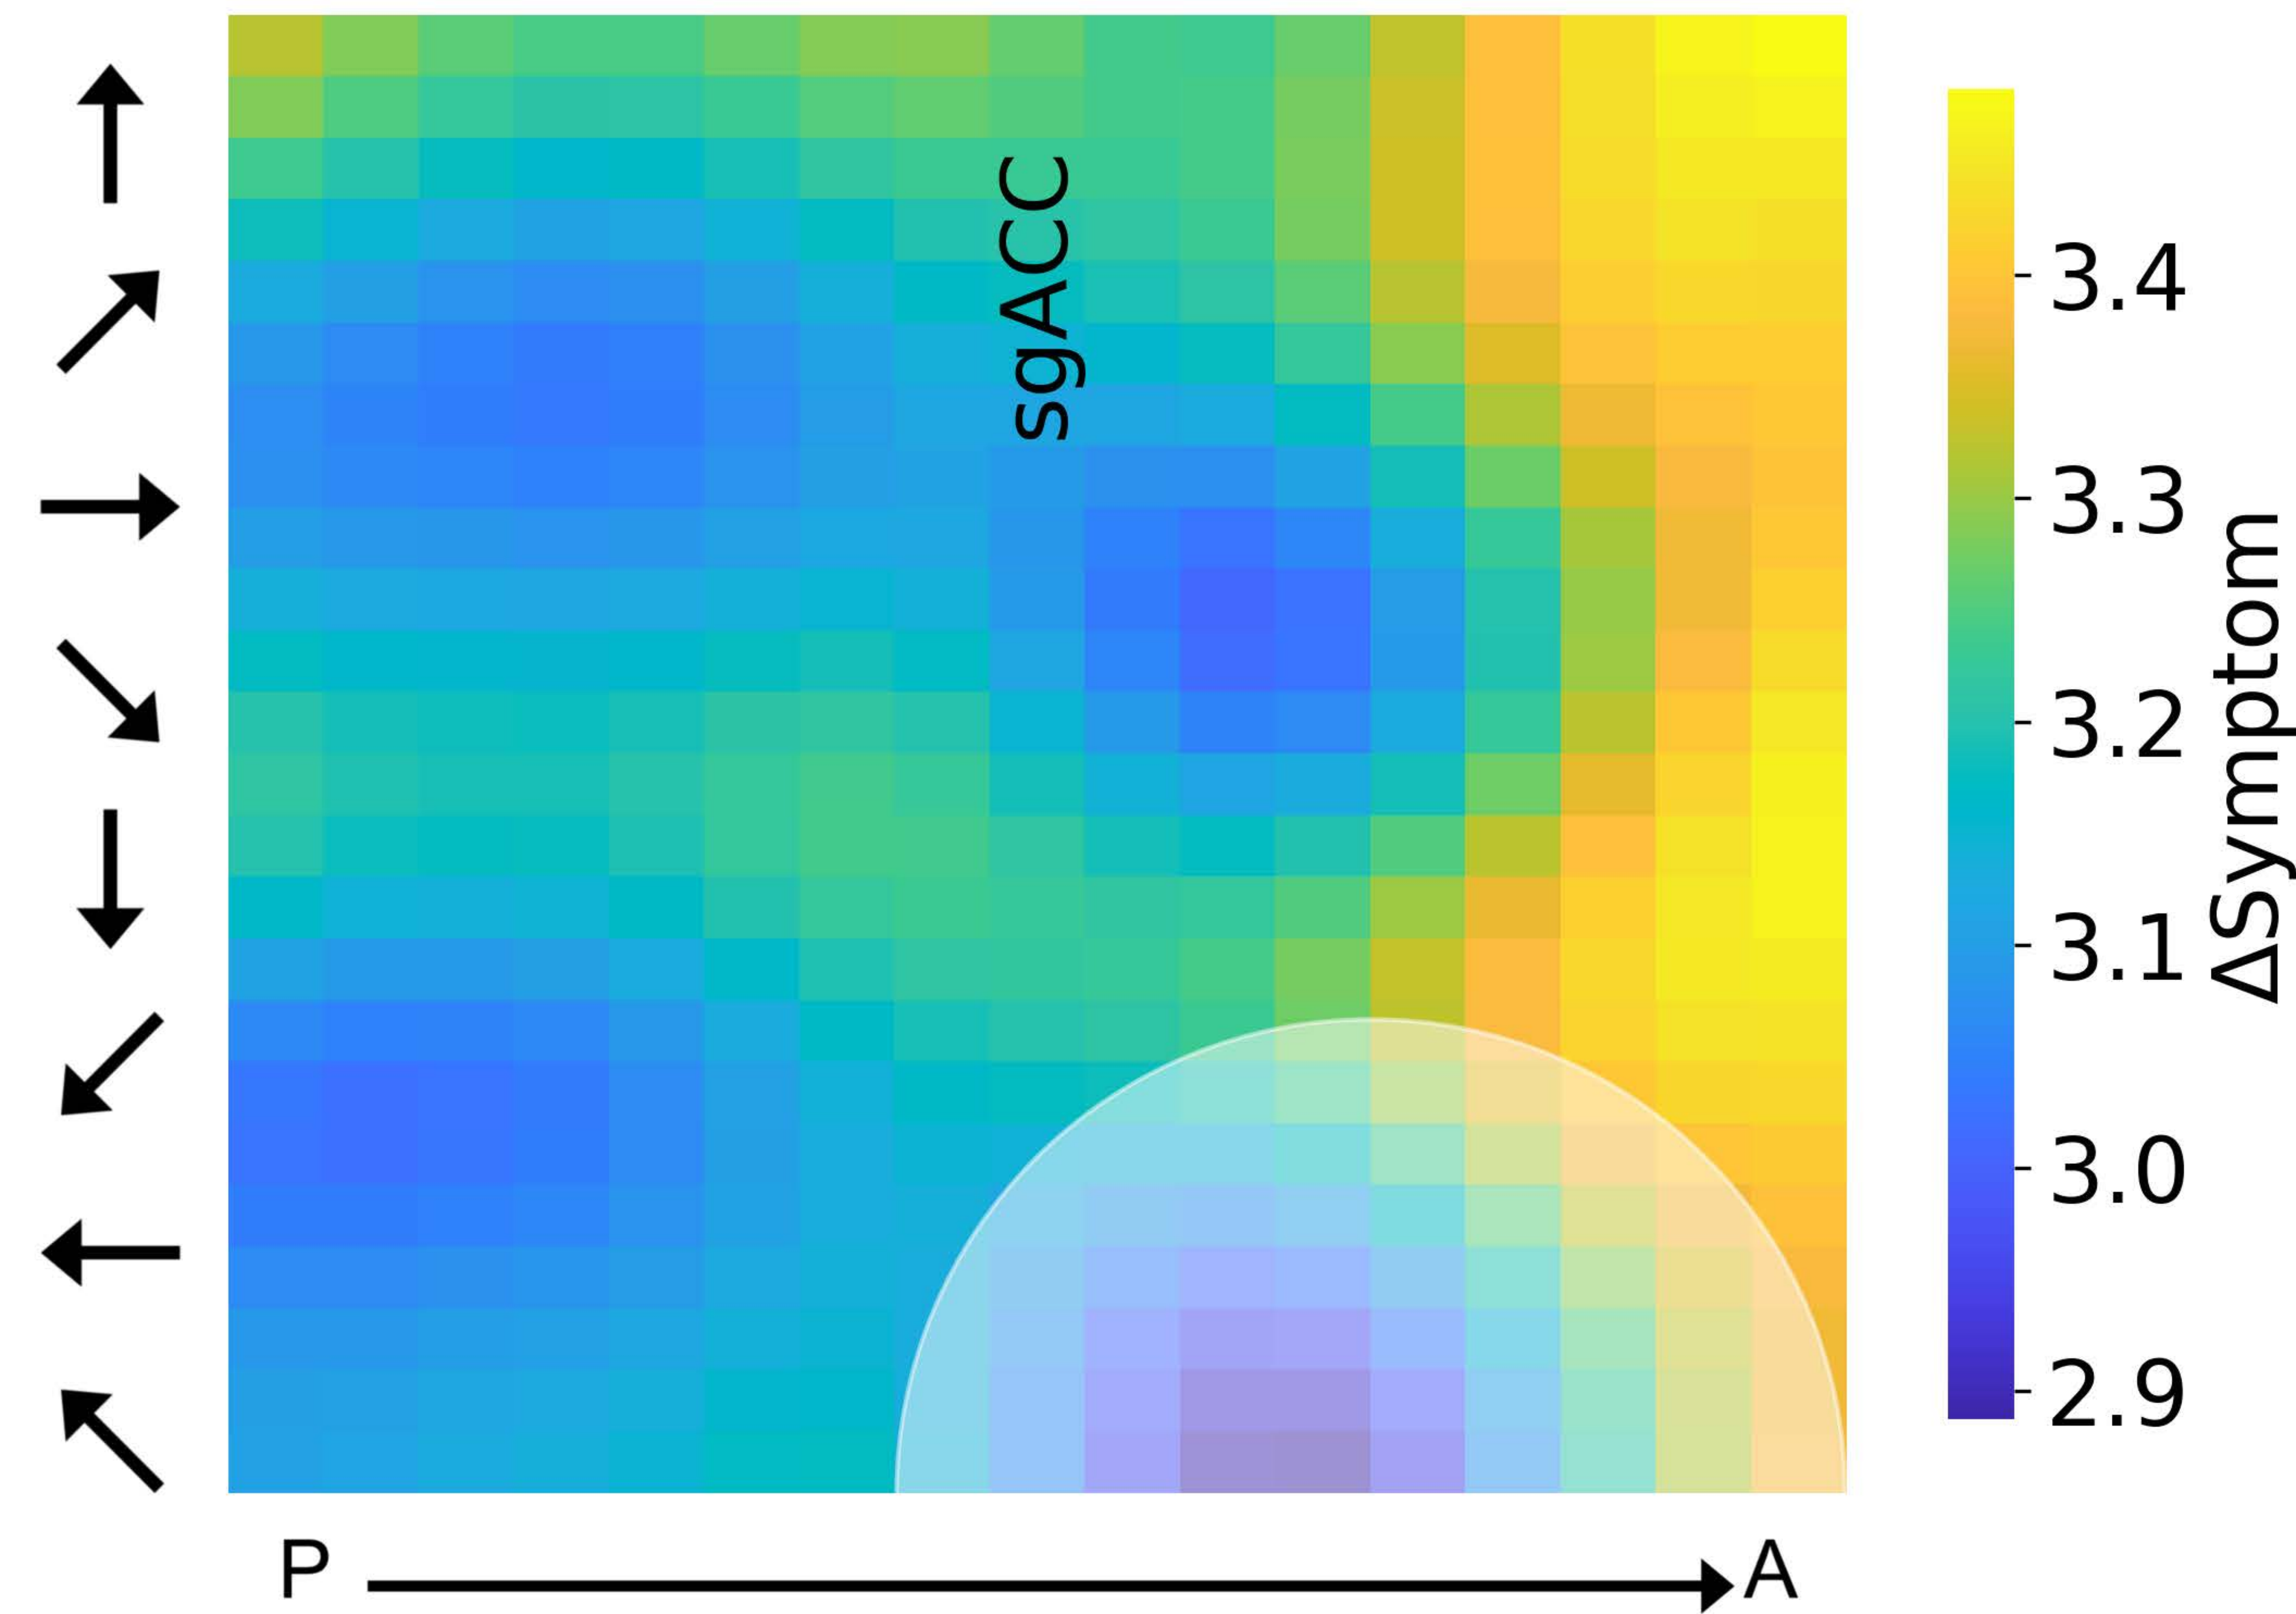



# INDARTH509MNV\_hamd\_right\_dlpfc

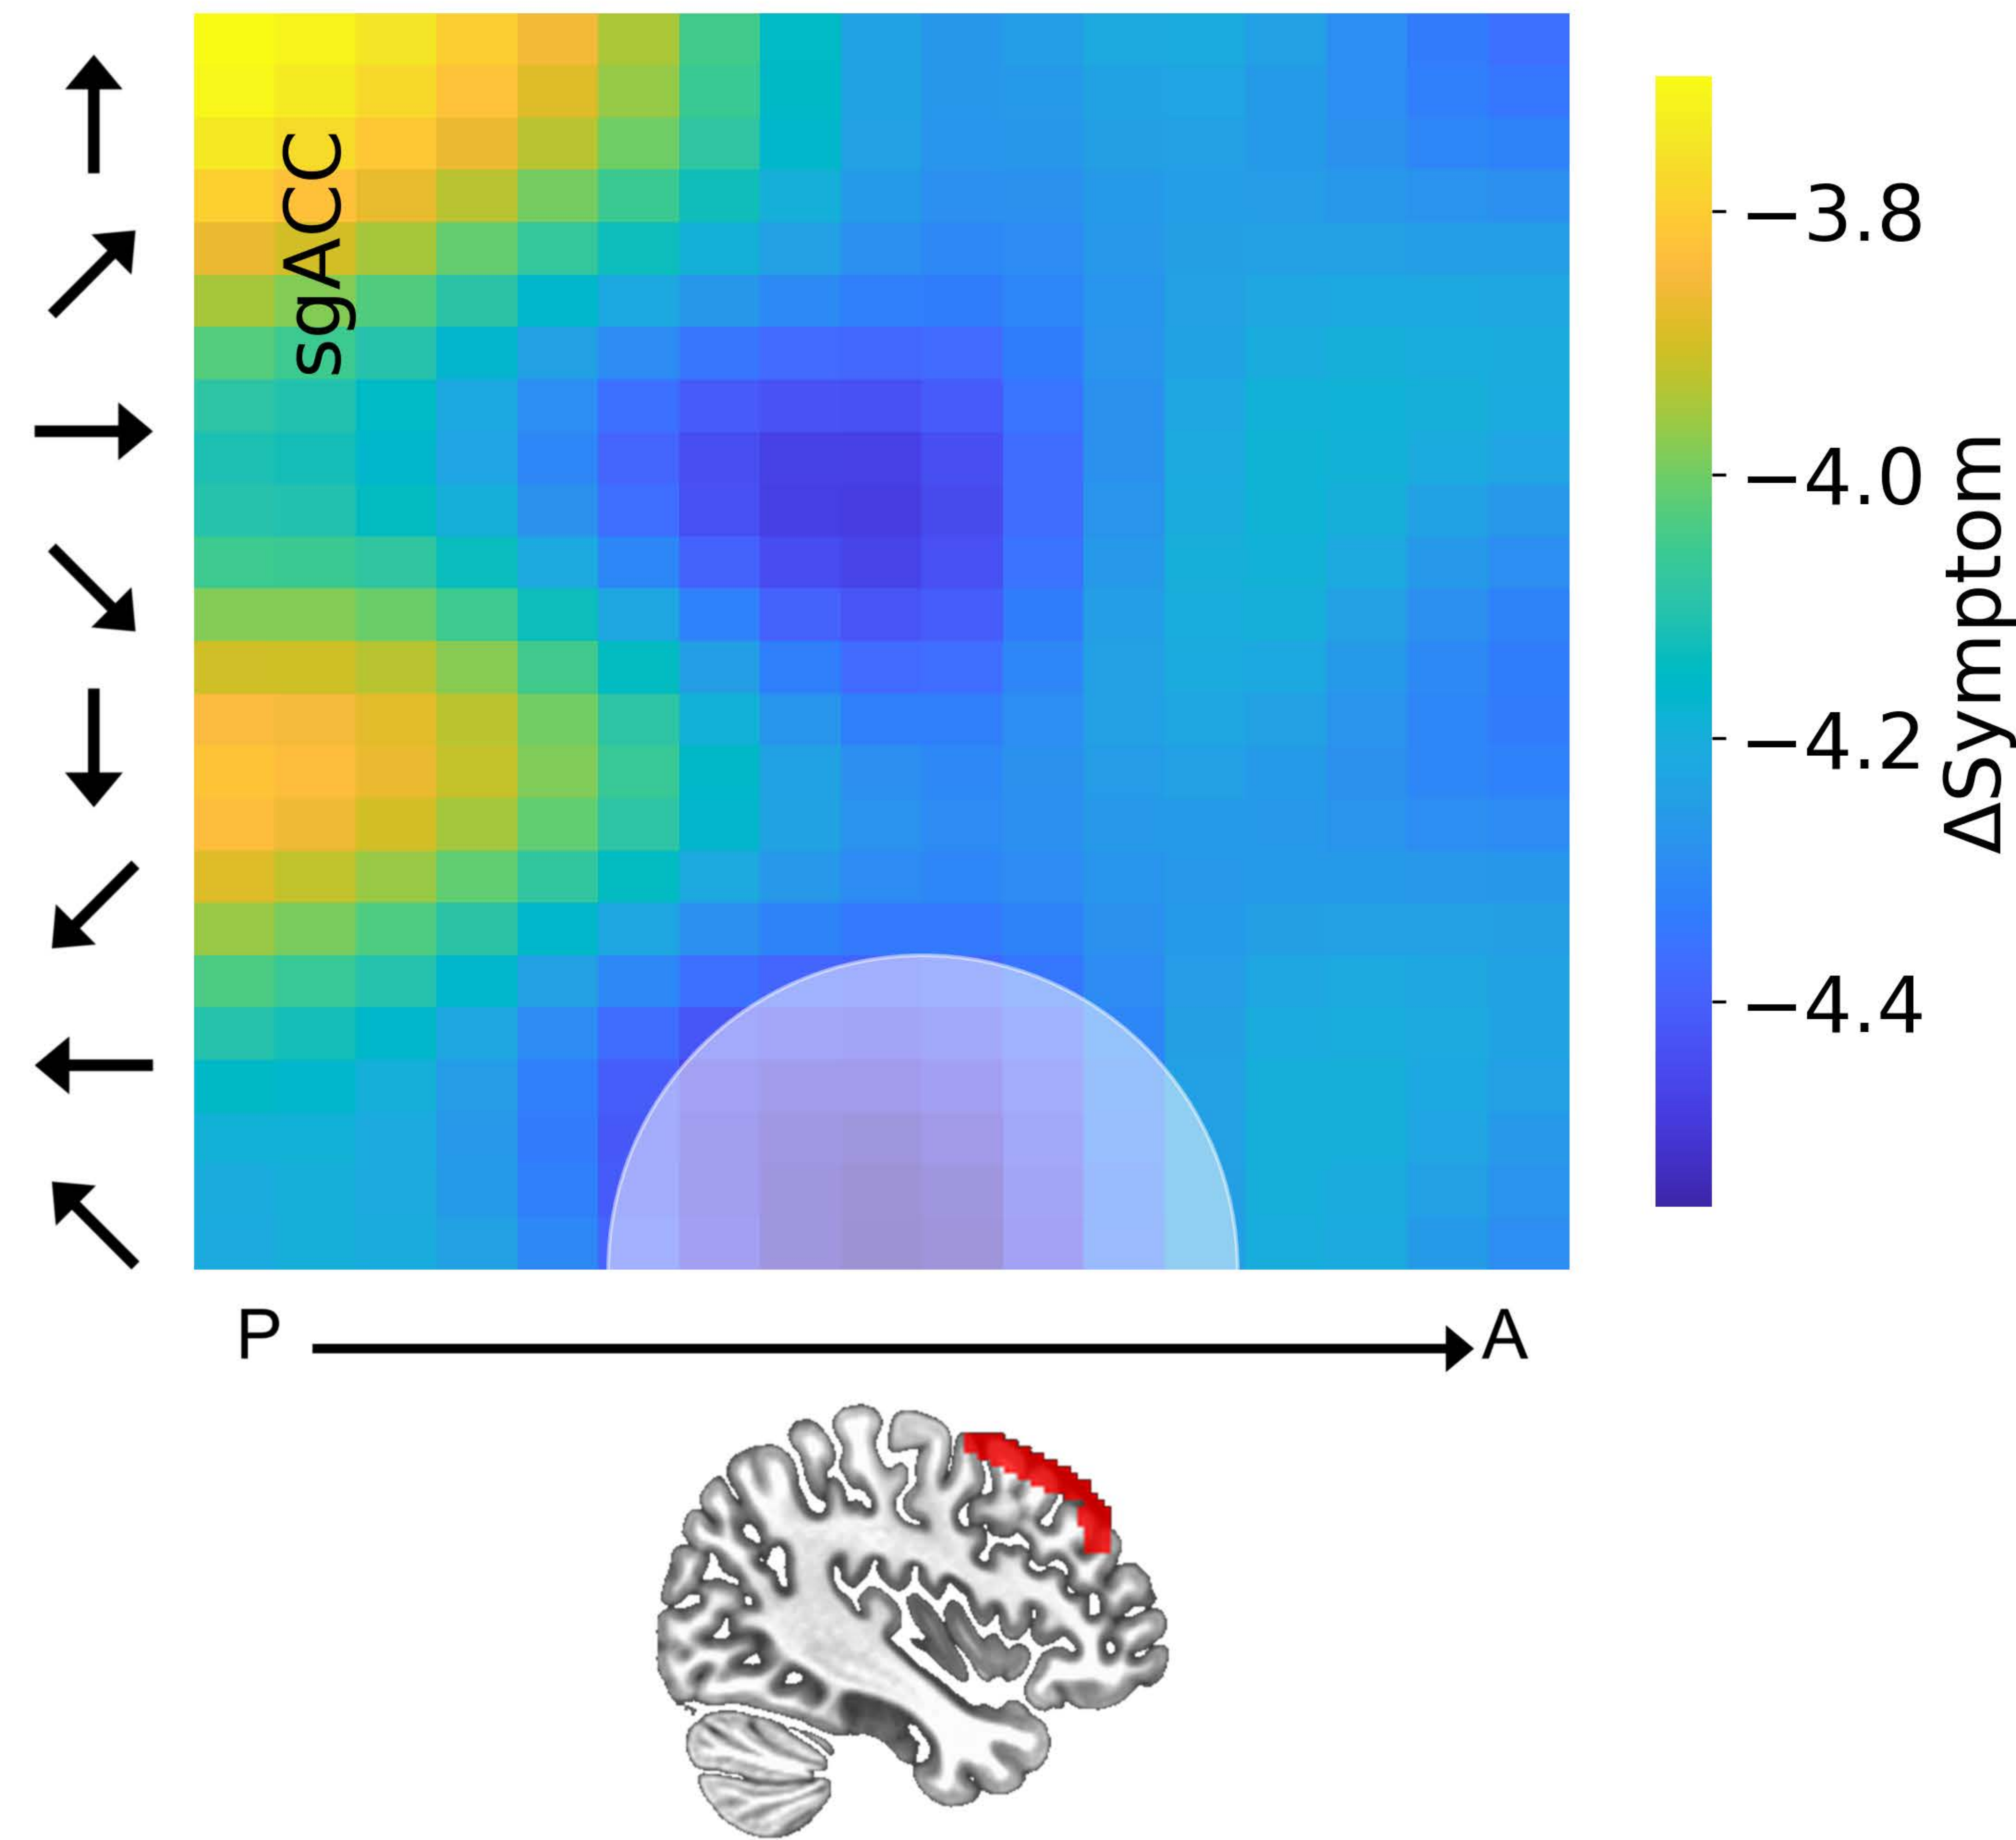



# NDARTT796GJK\_hamd\_right\_dlpfc

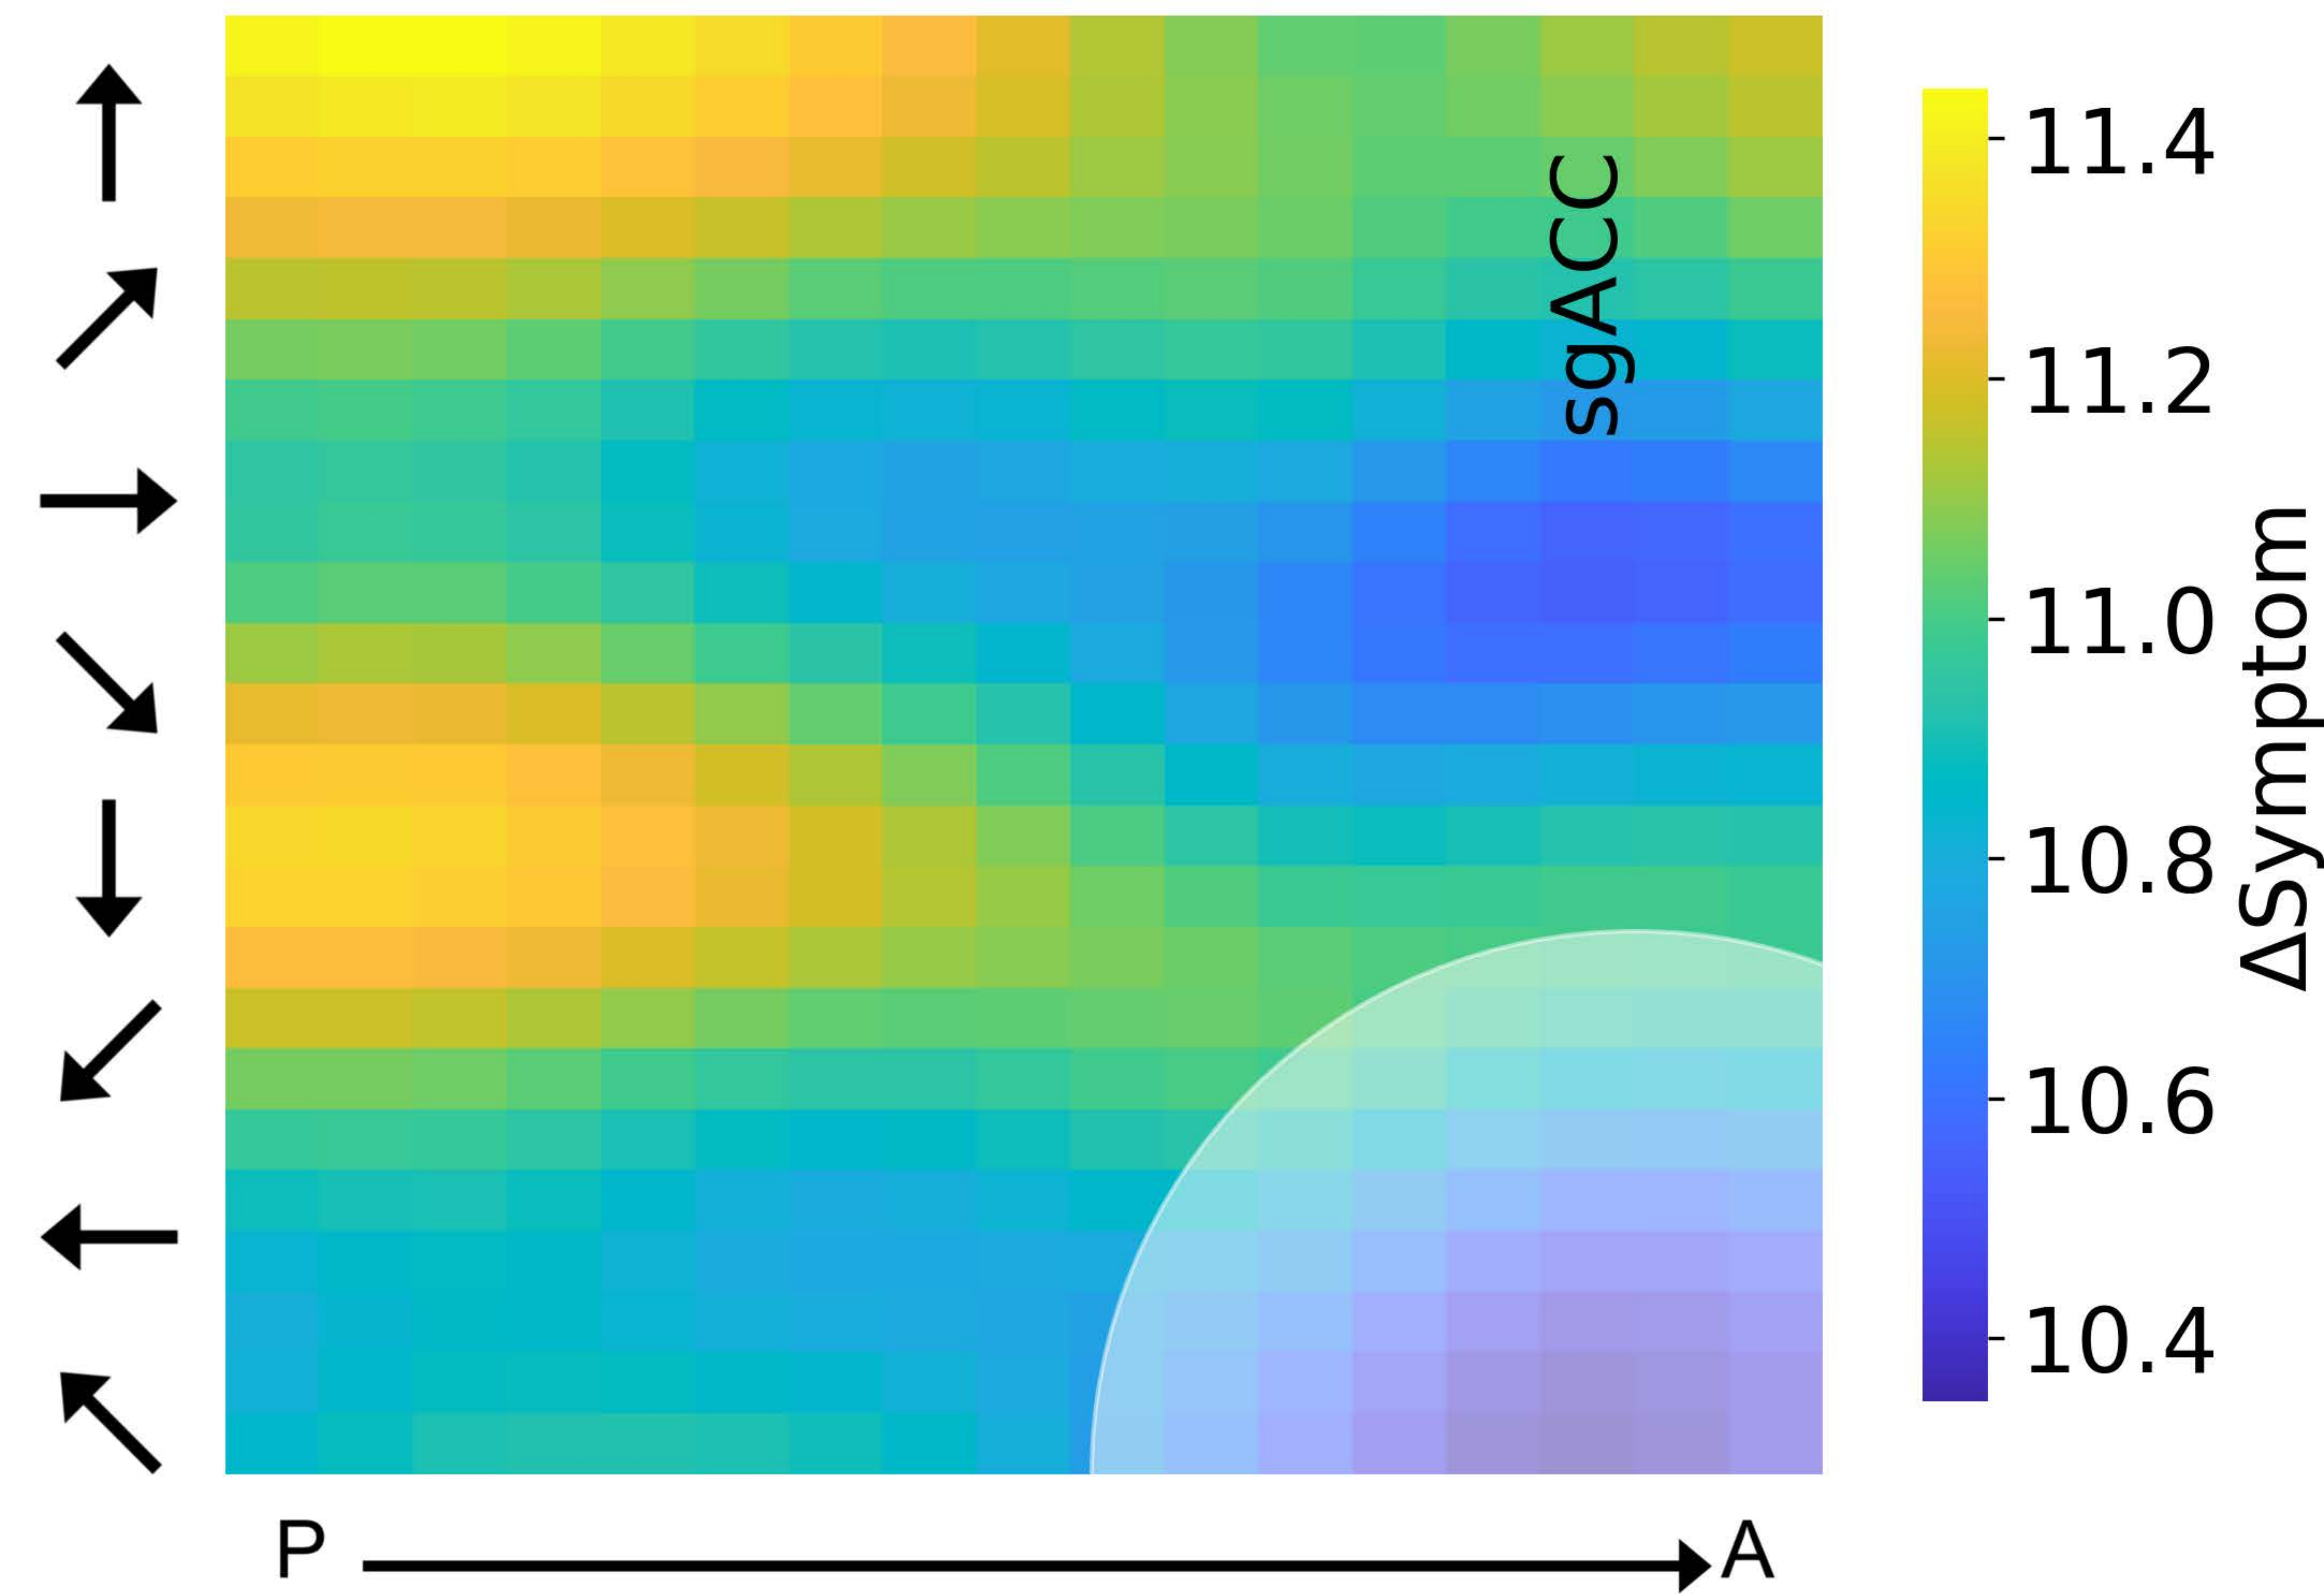



# NDARTZ590DYE\_hamd\_right\_dlpfc

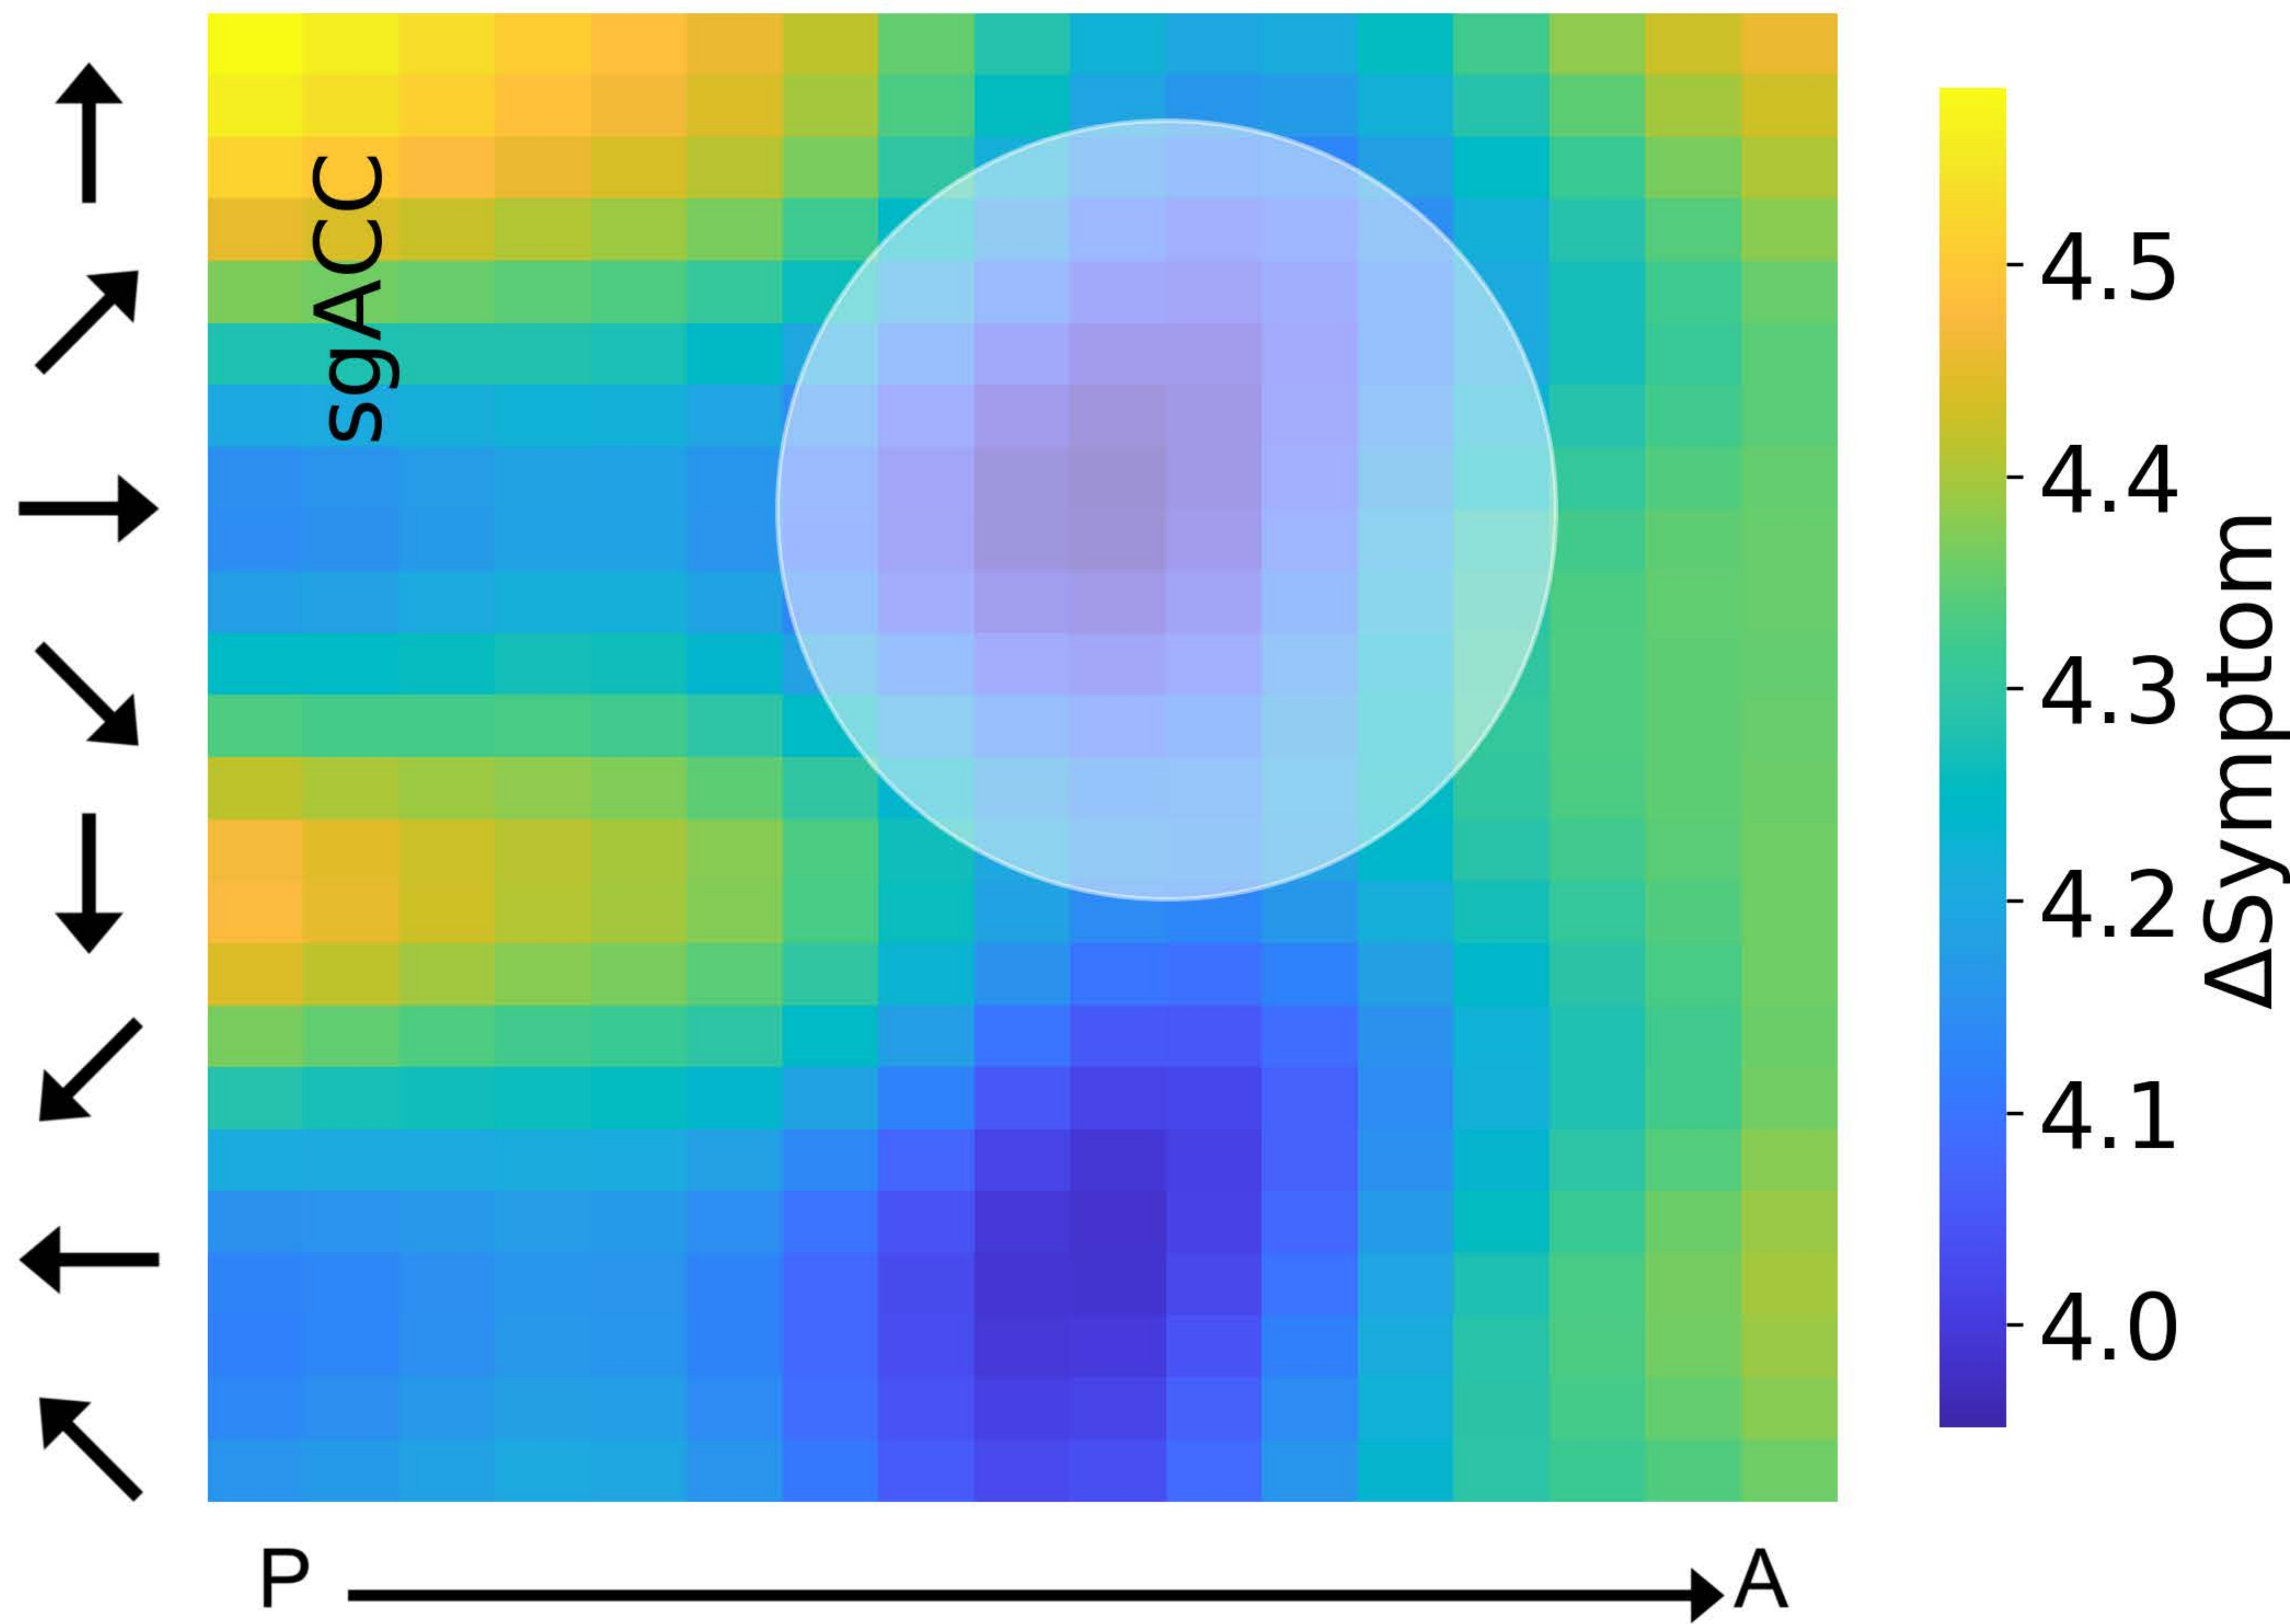



# INDARUJ223ZPN\_hamd\_right\_dlpfc

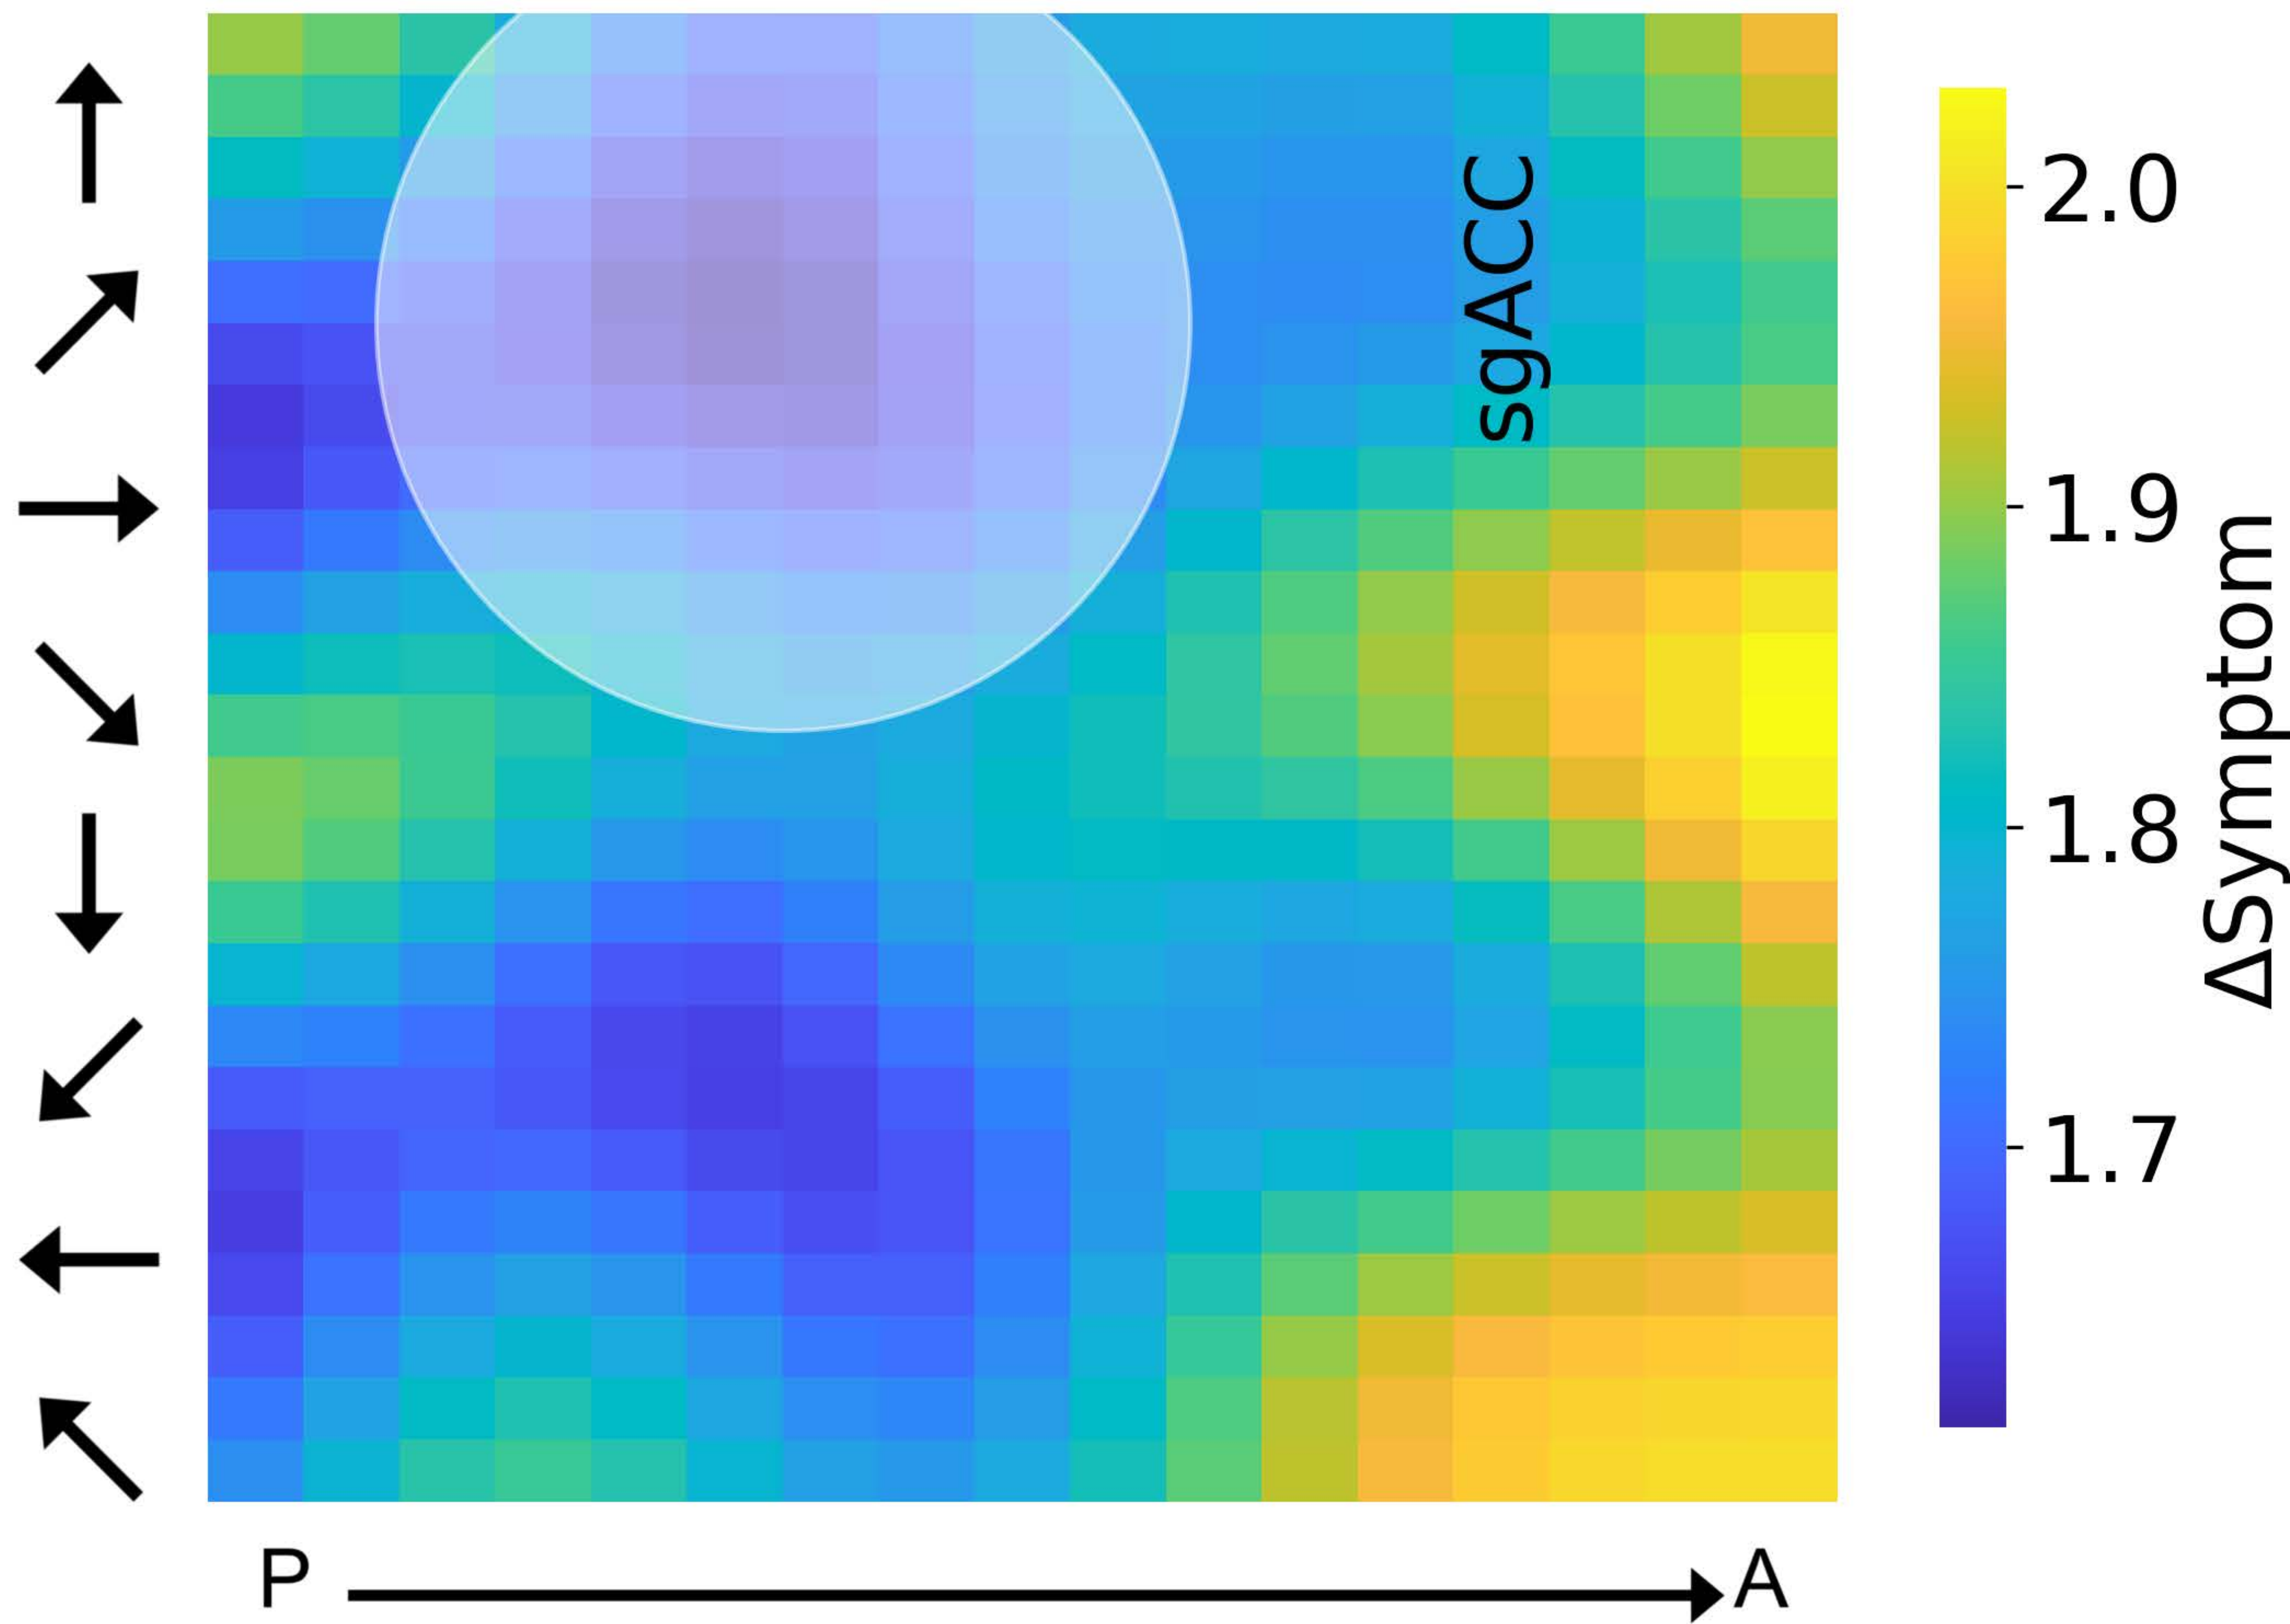



# NDARUM818JC1\_hamd\_right\_dlpfc

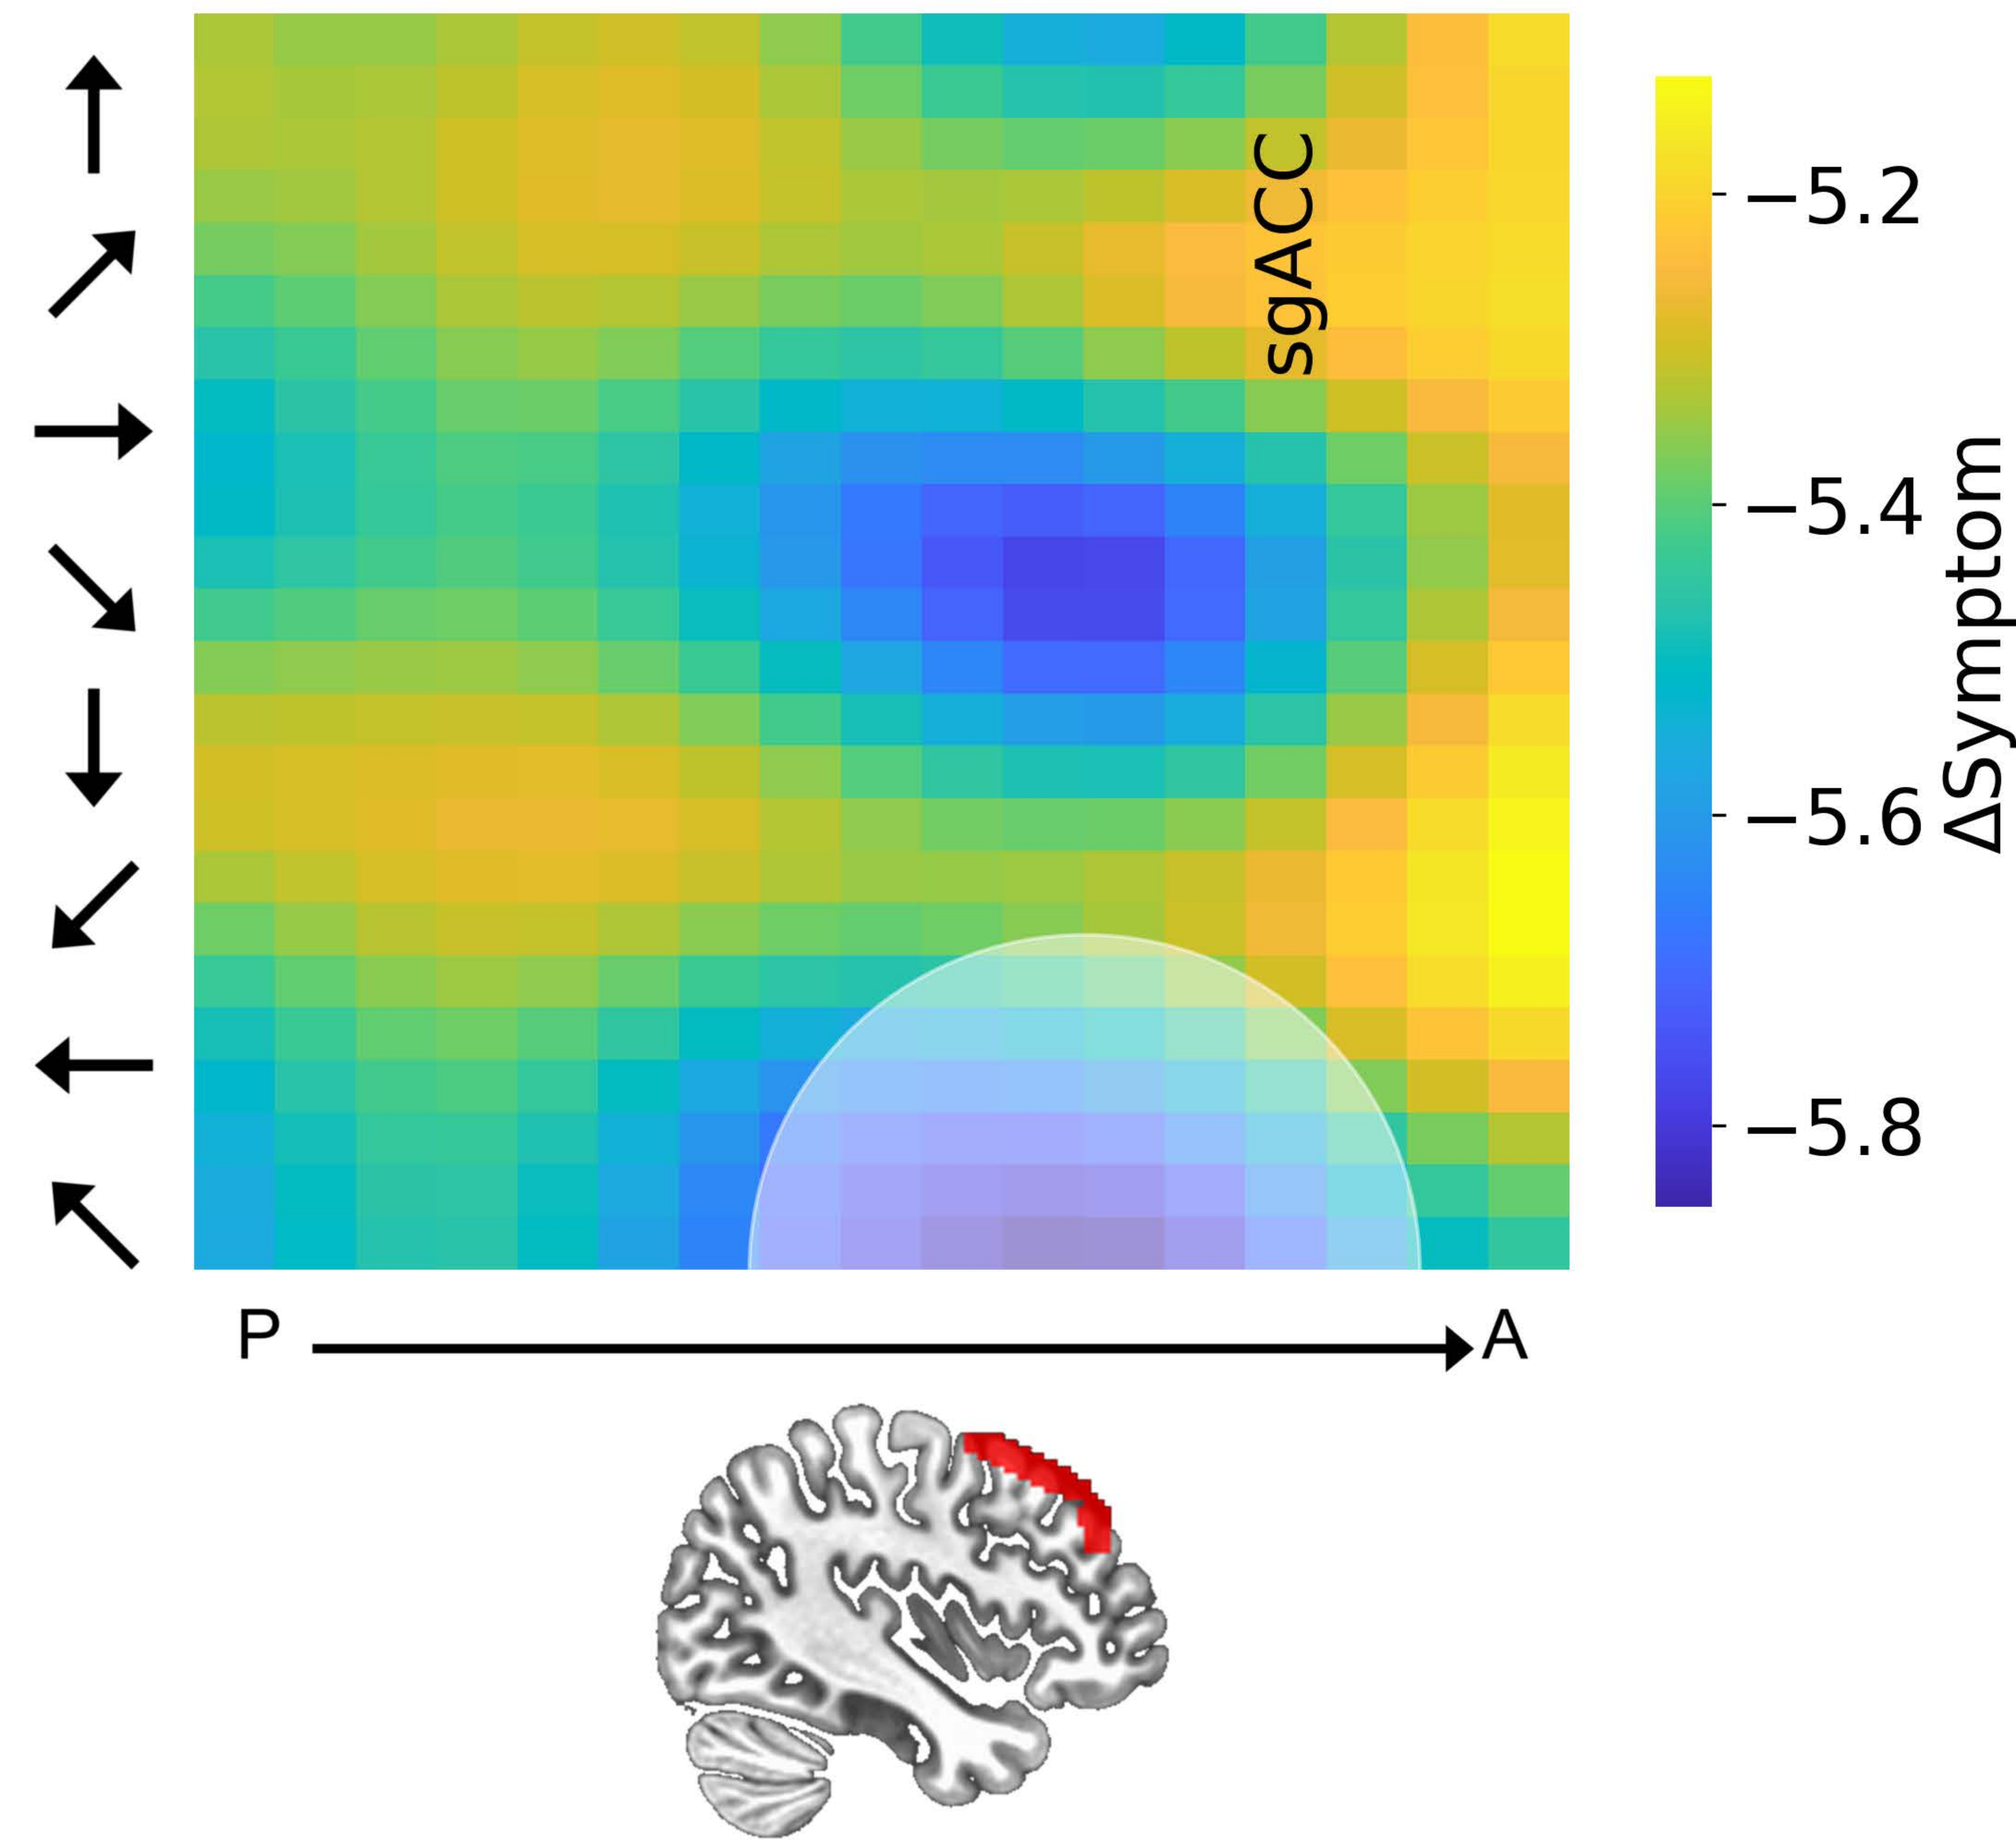



# INDARUT852KUX\_hamd\_right\_dlpfc

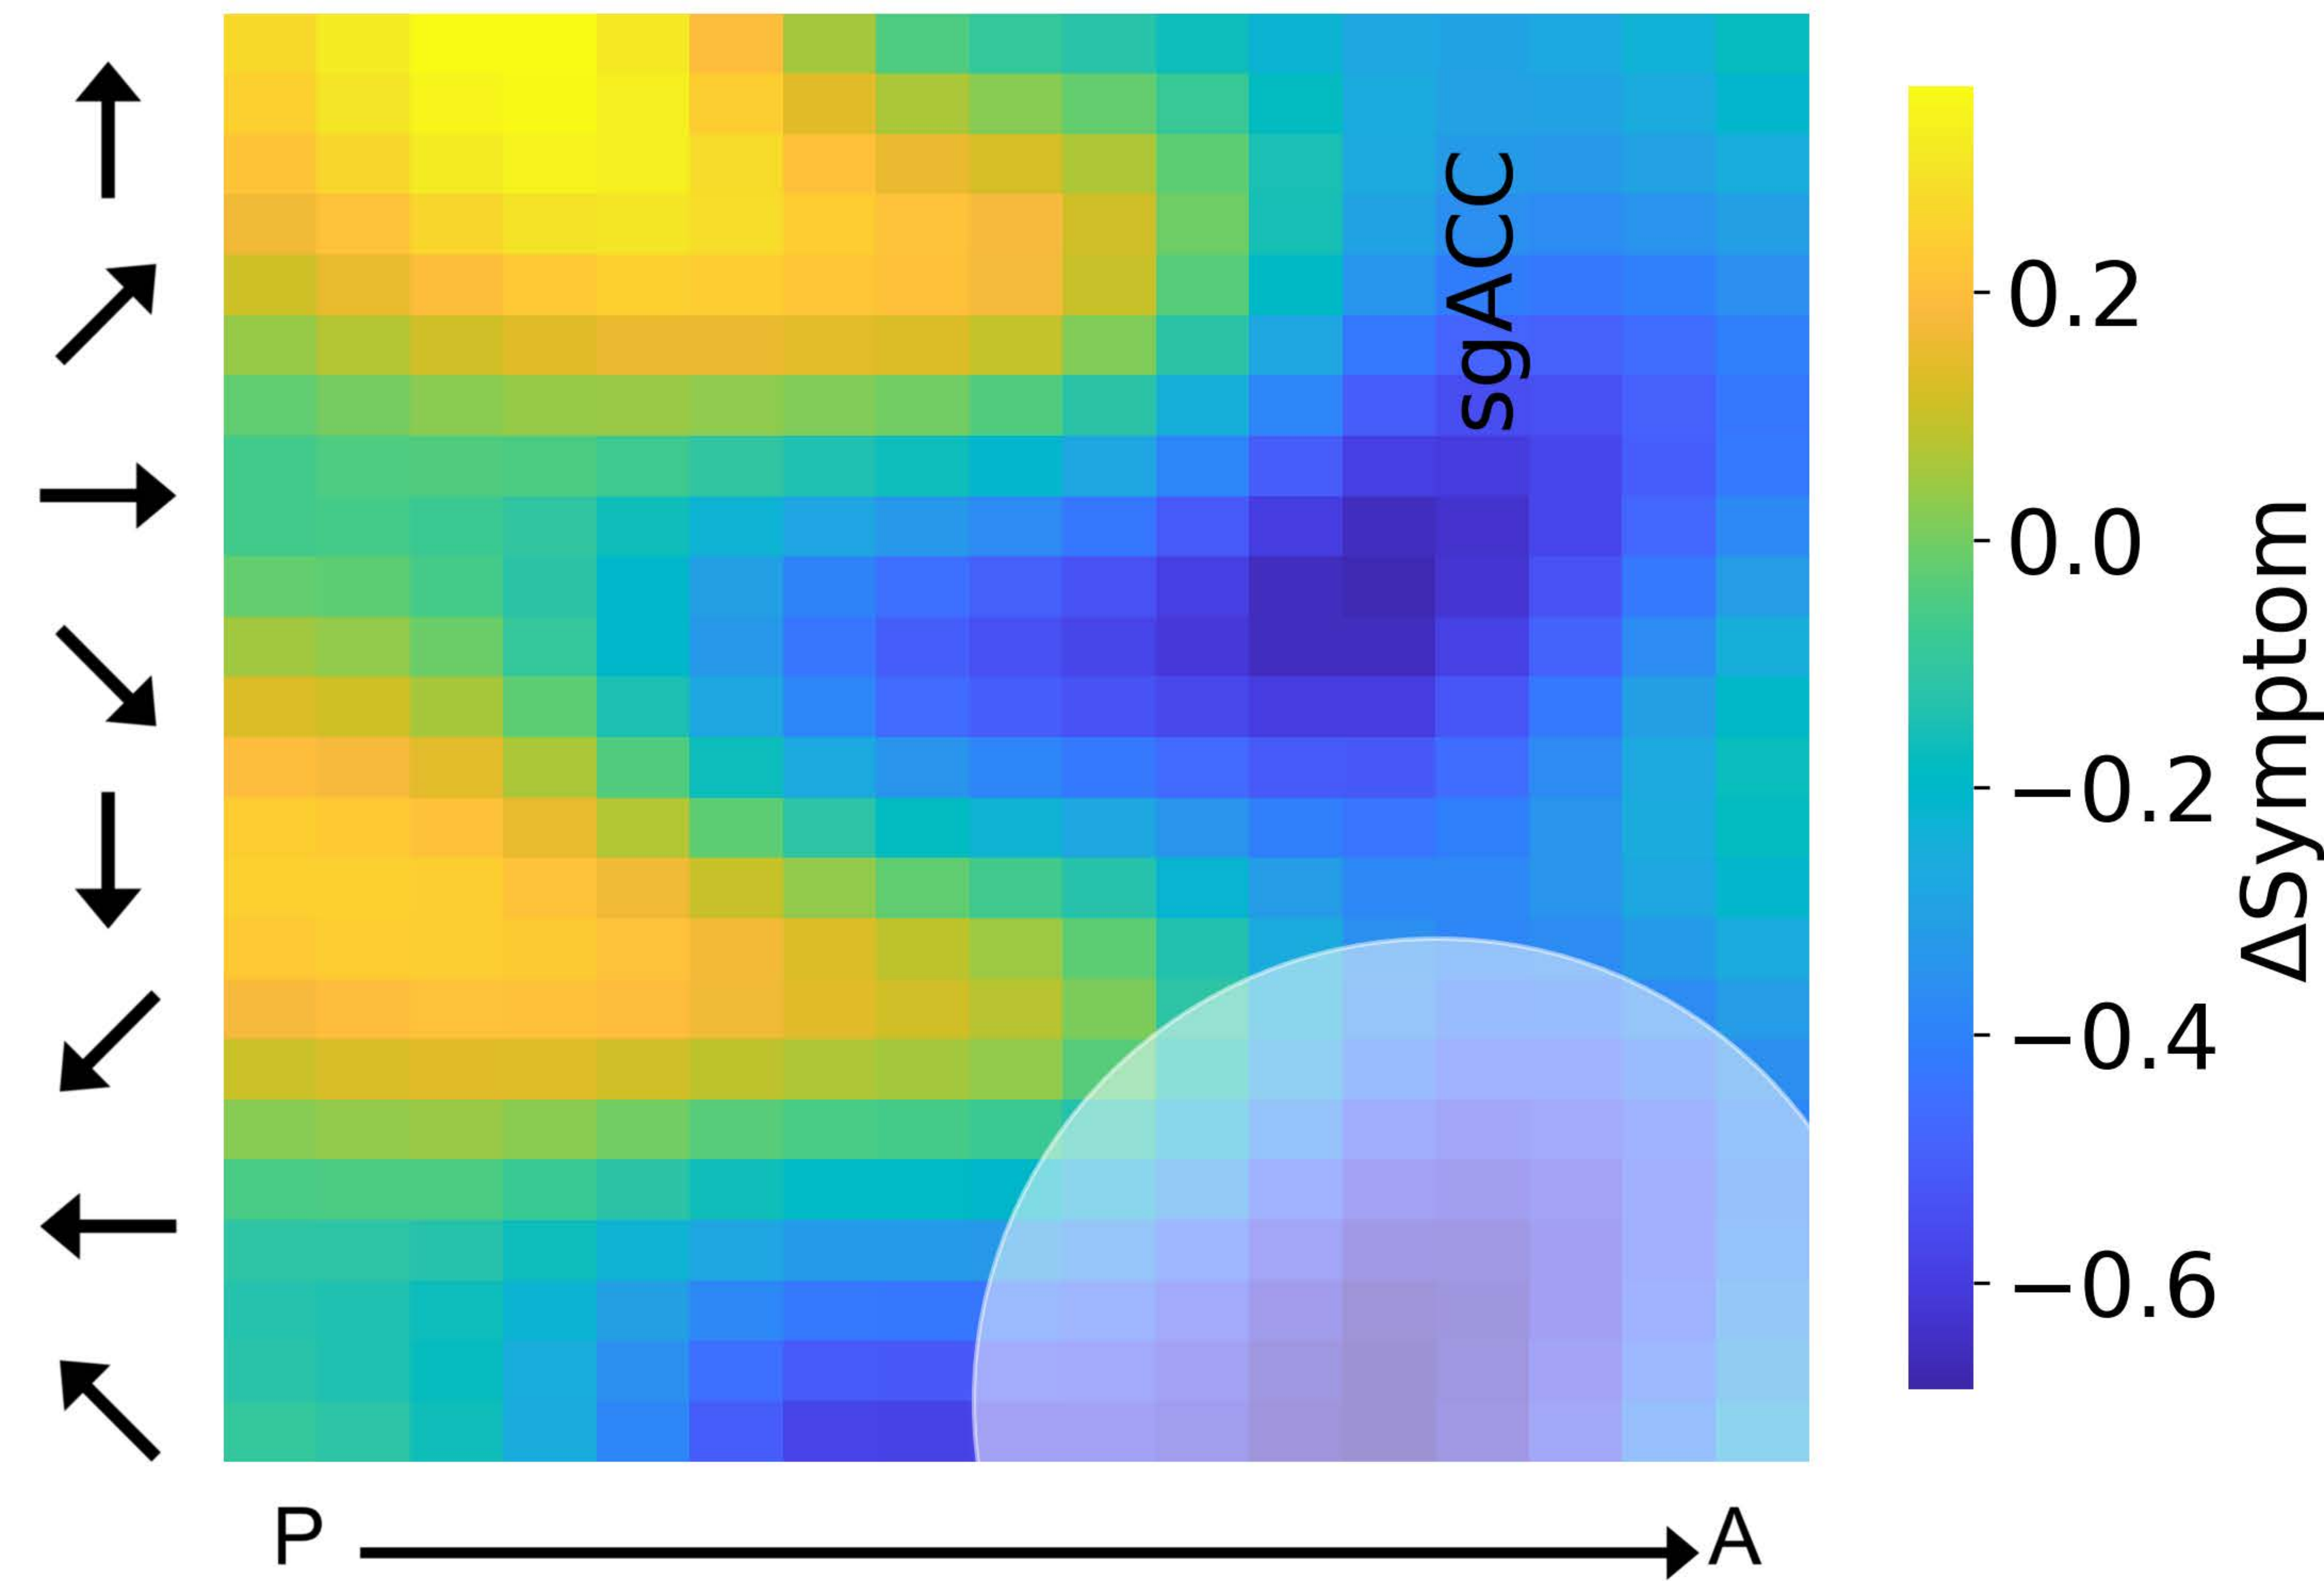



# INDARVE642FAN\_hamd\_right\_dlpfc

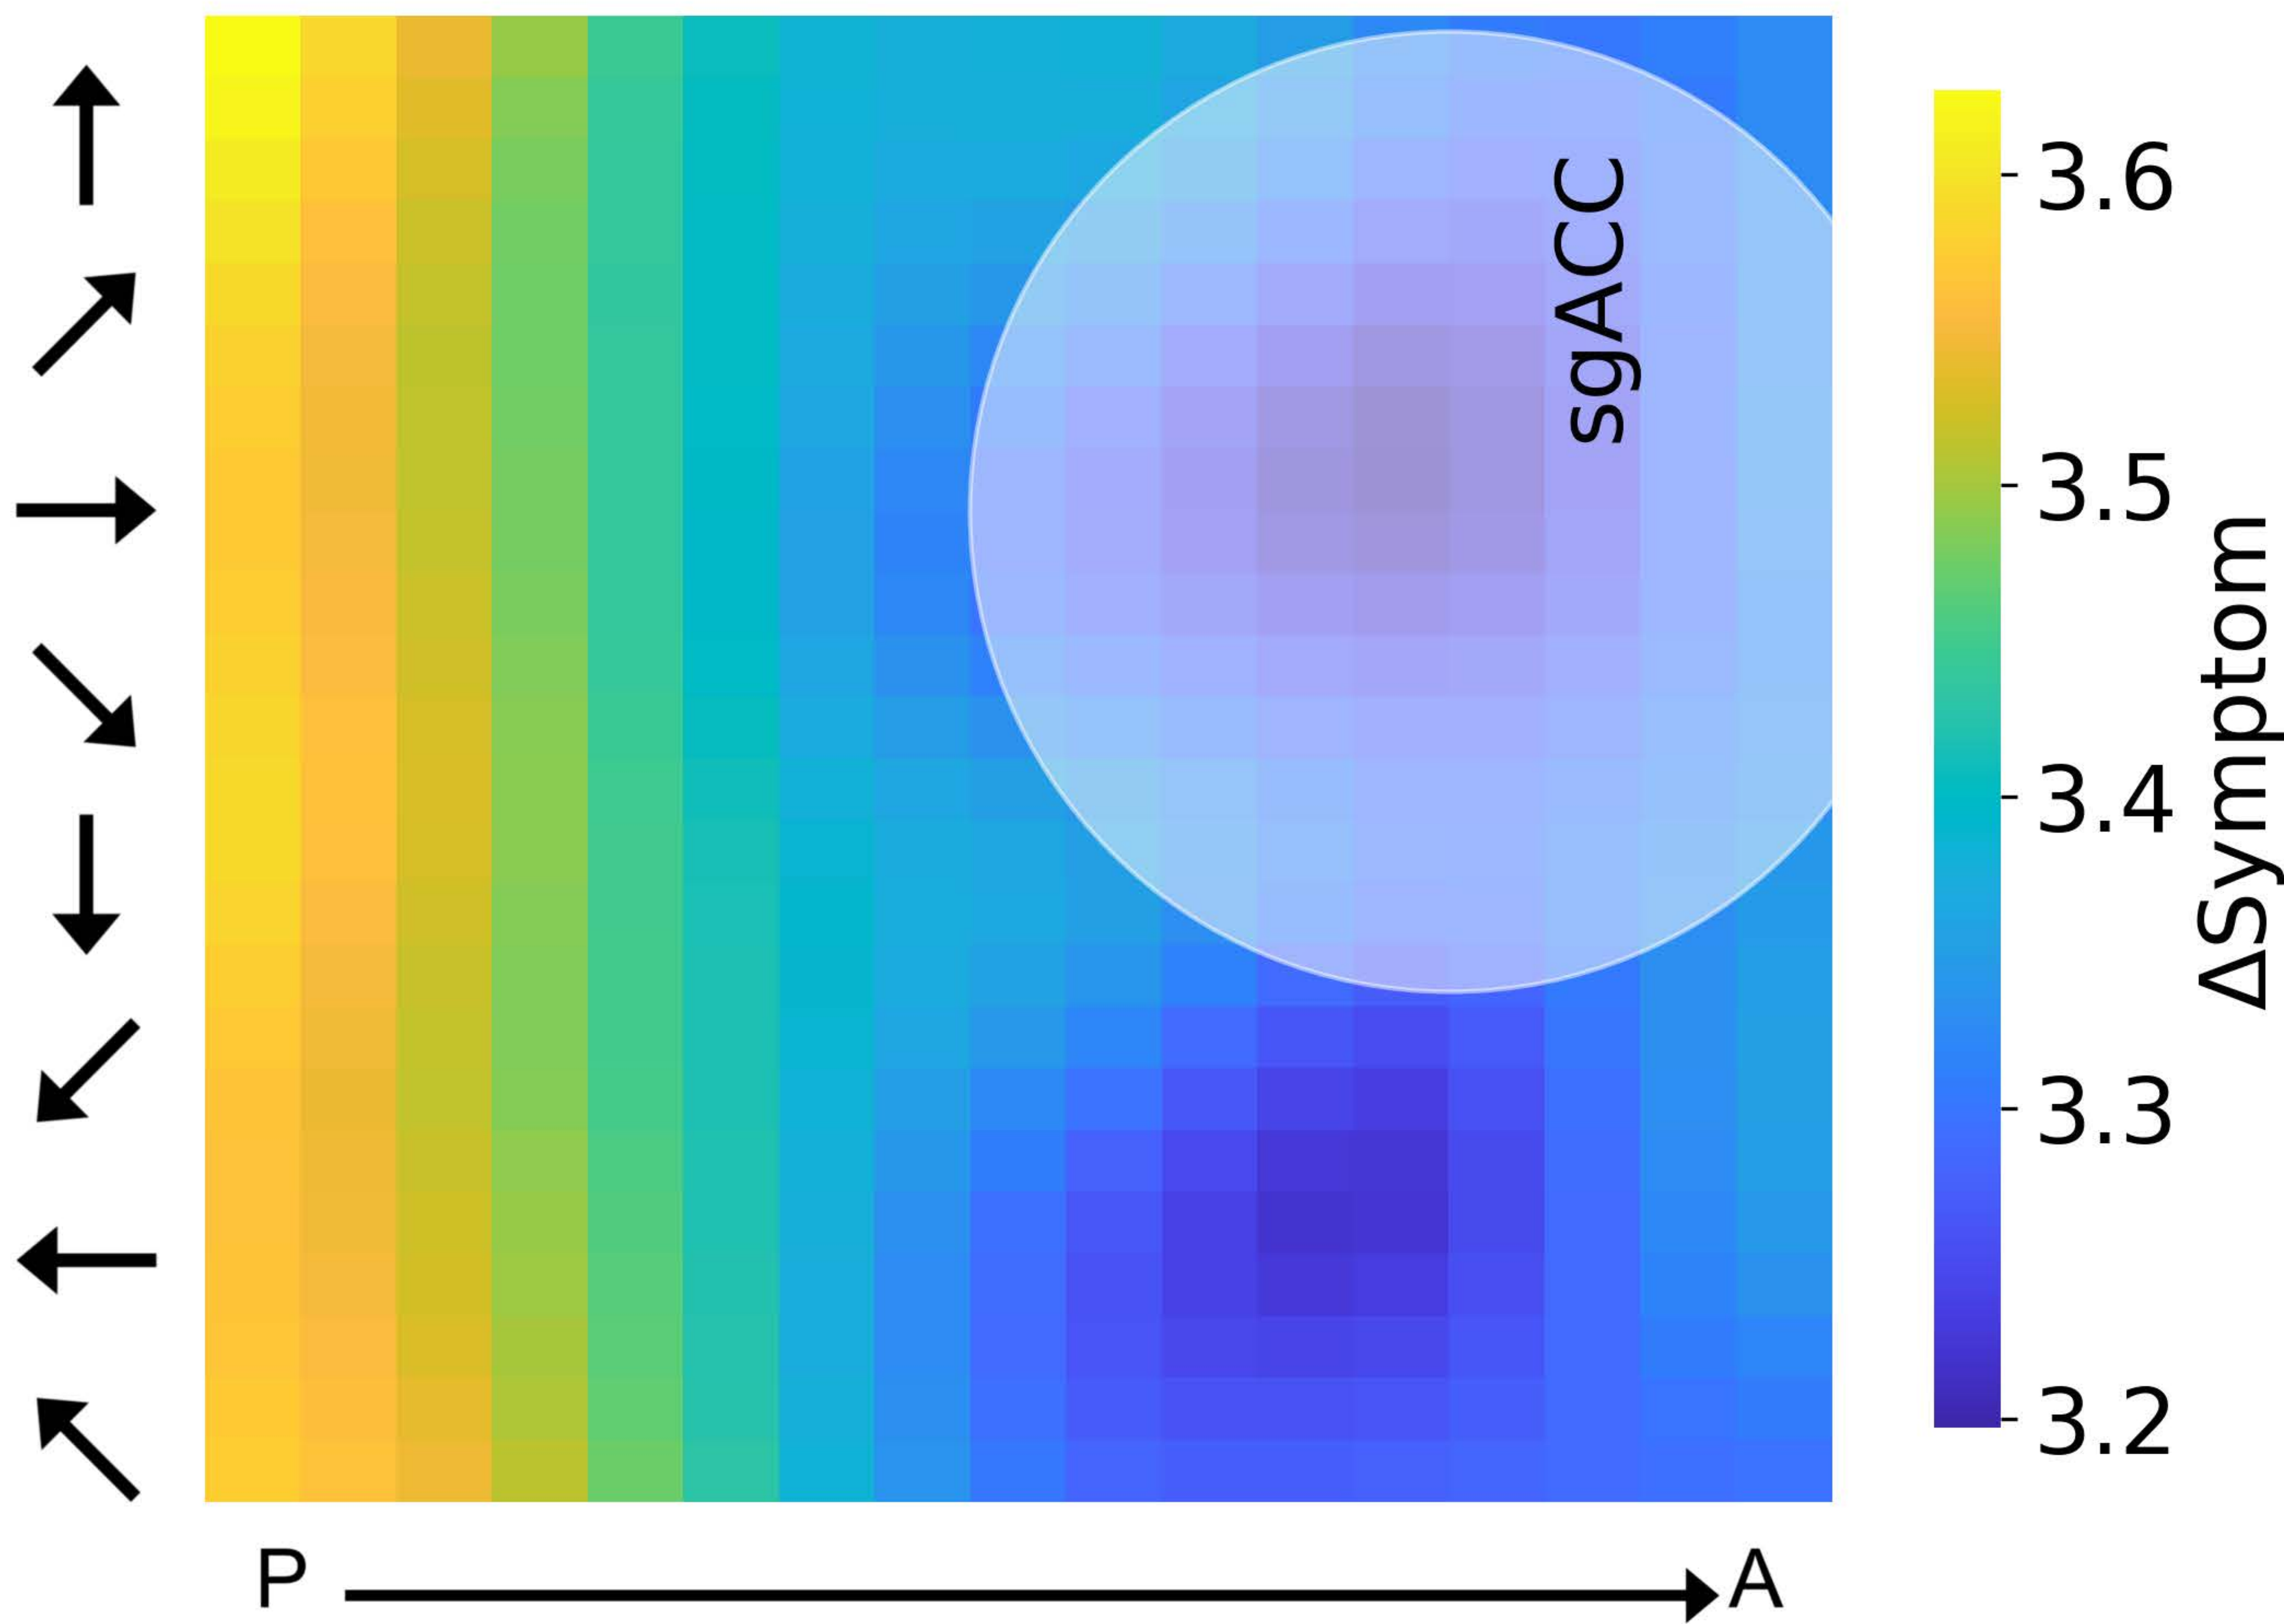



# INDARVL144YVF\_hamd\_right\_dlpfc

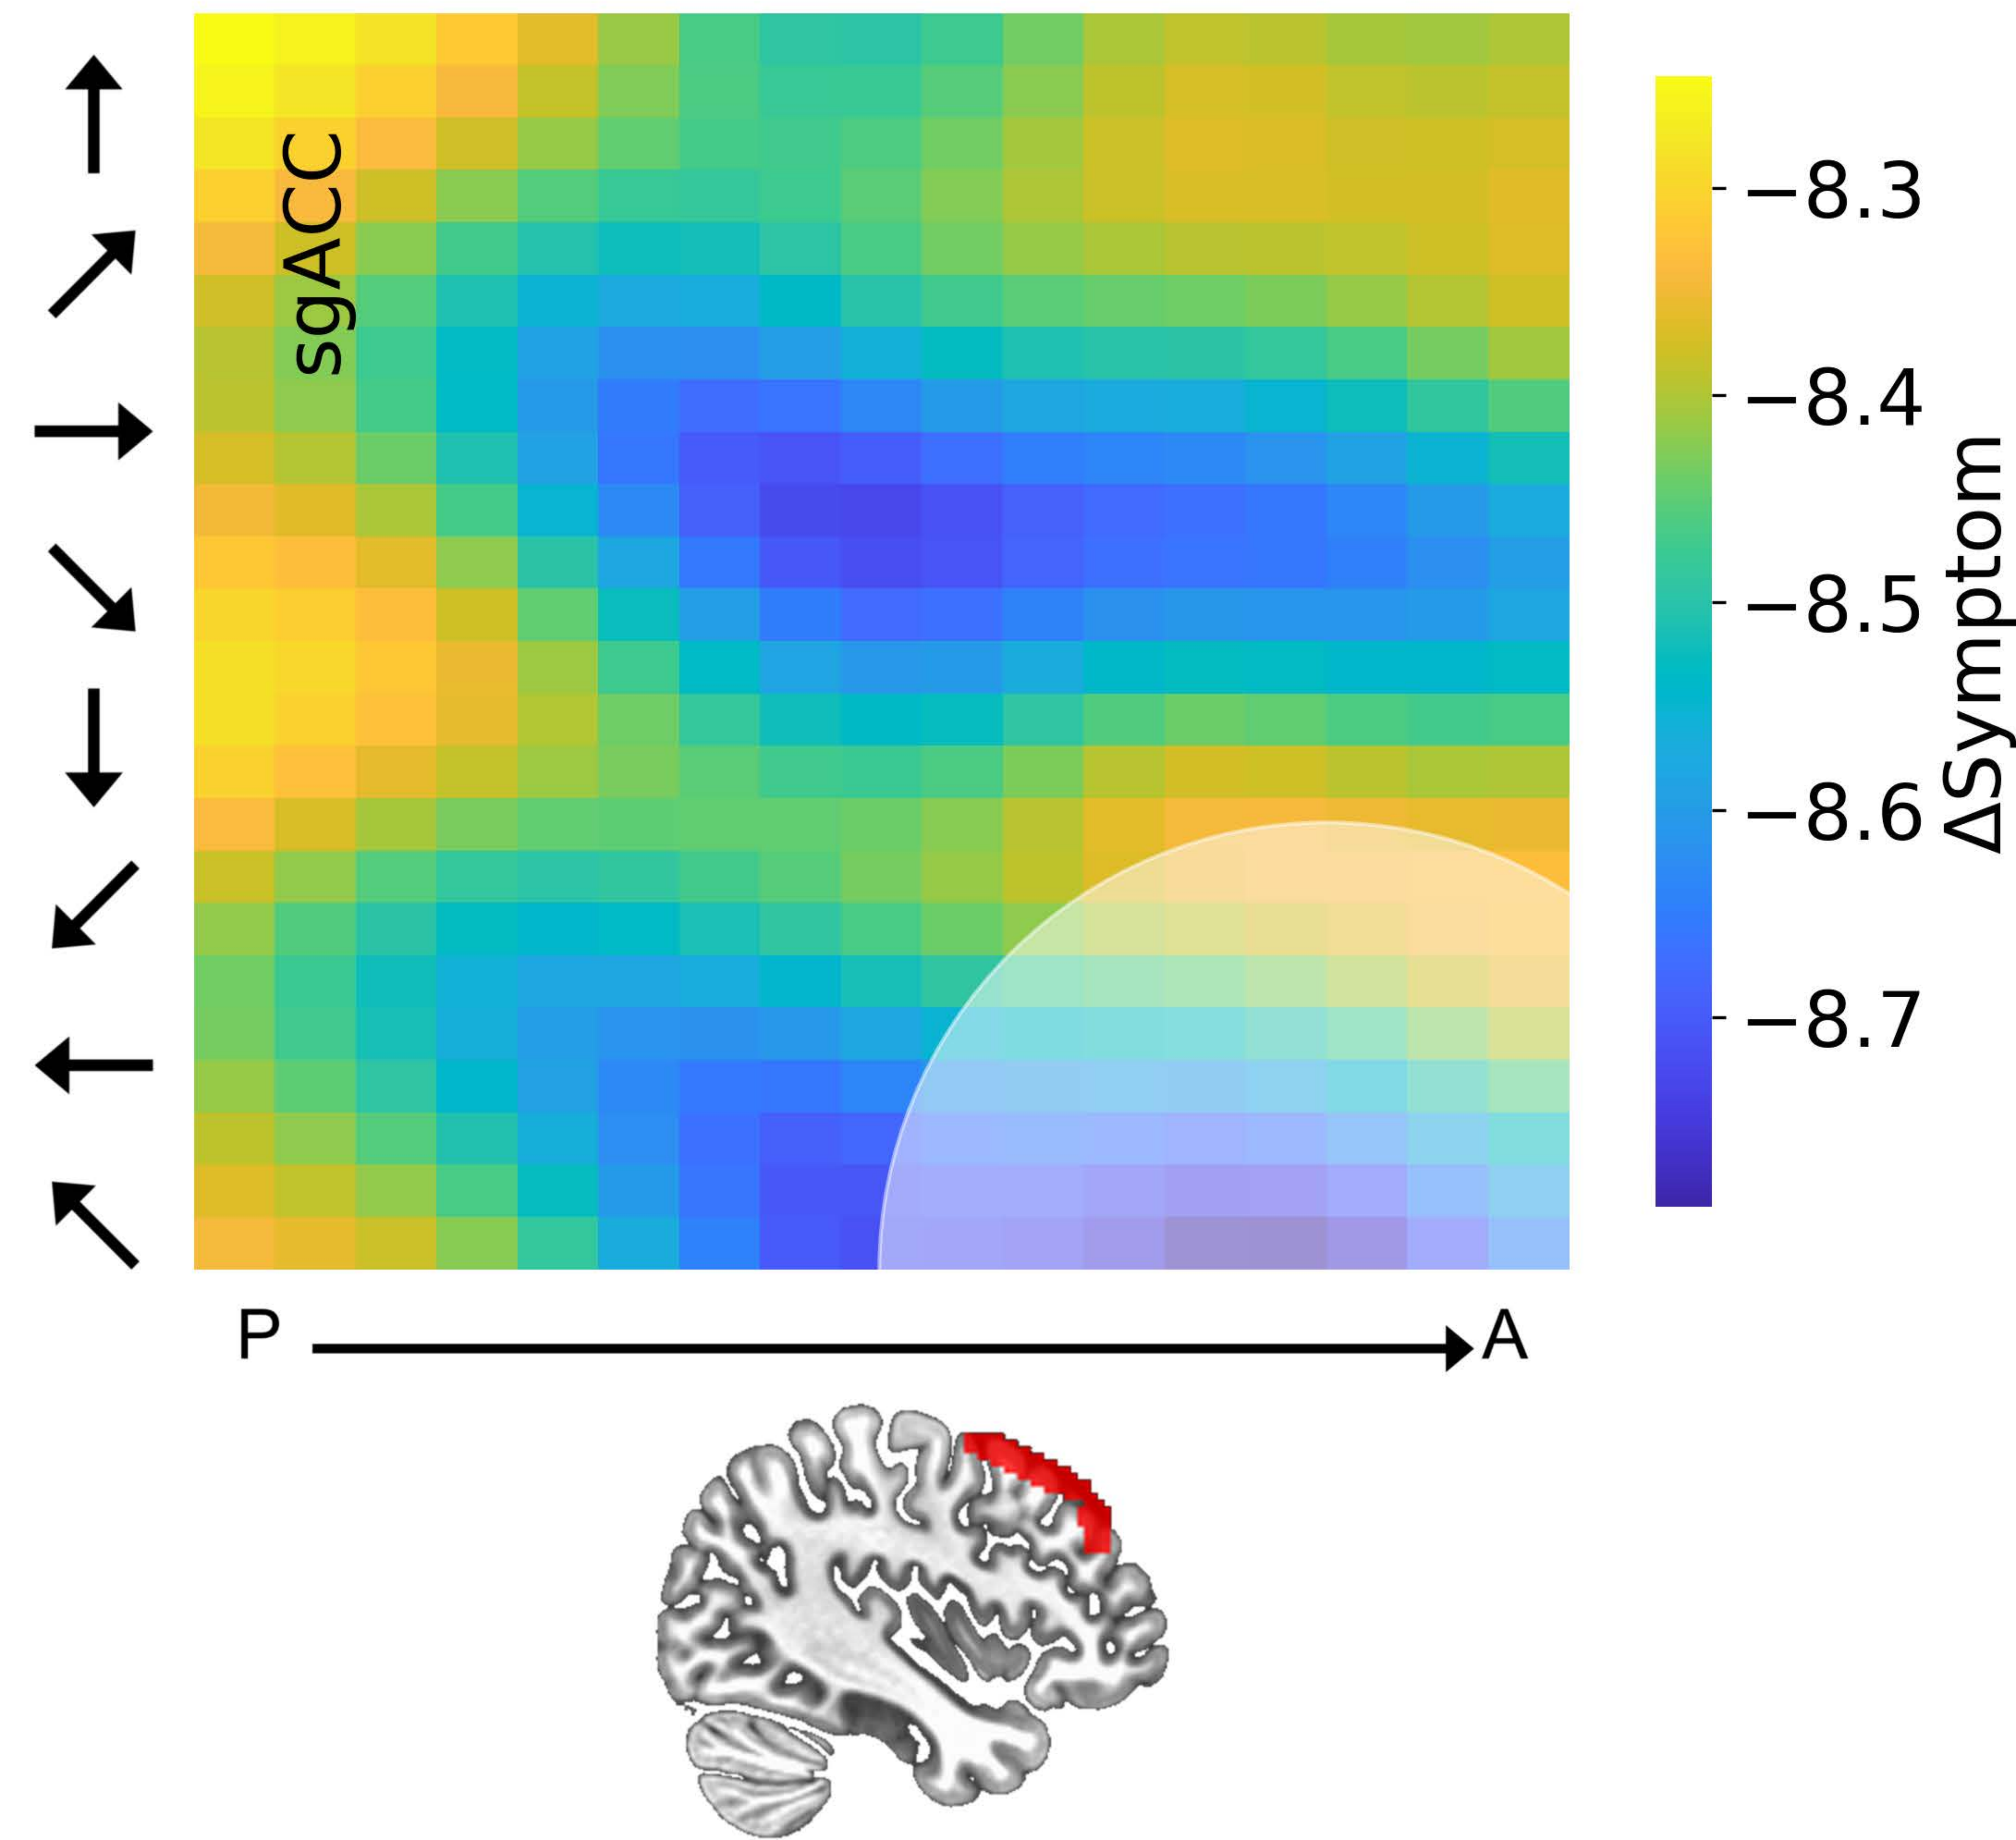



# INDARWH523DTV\_hamd\_right\_dlpfc

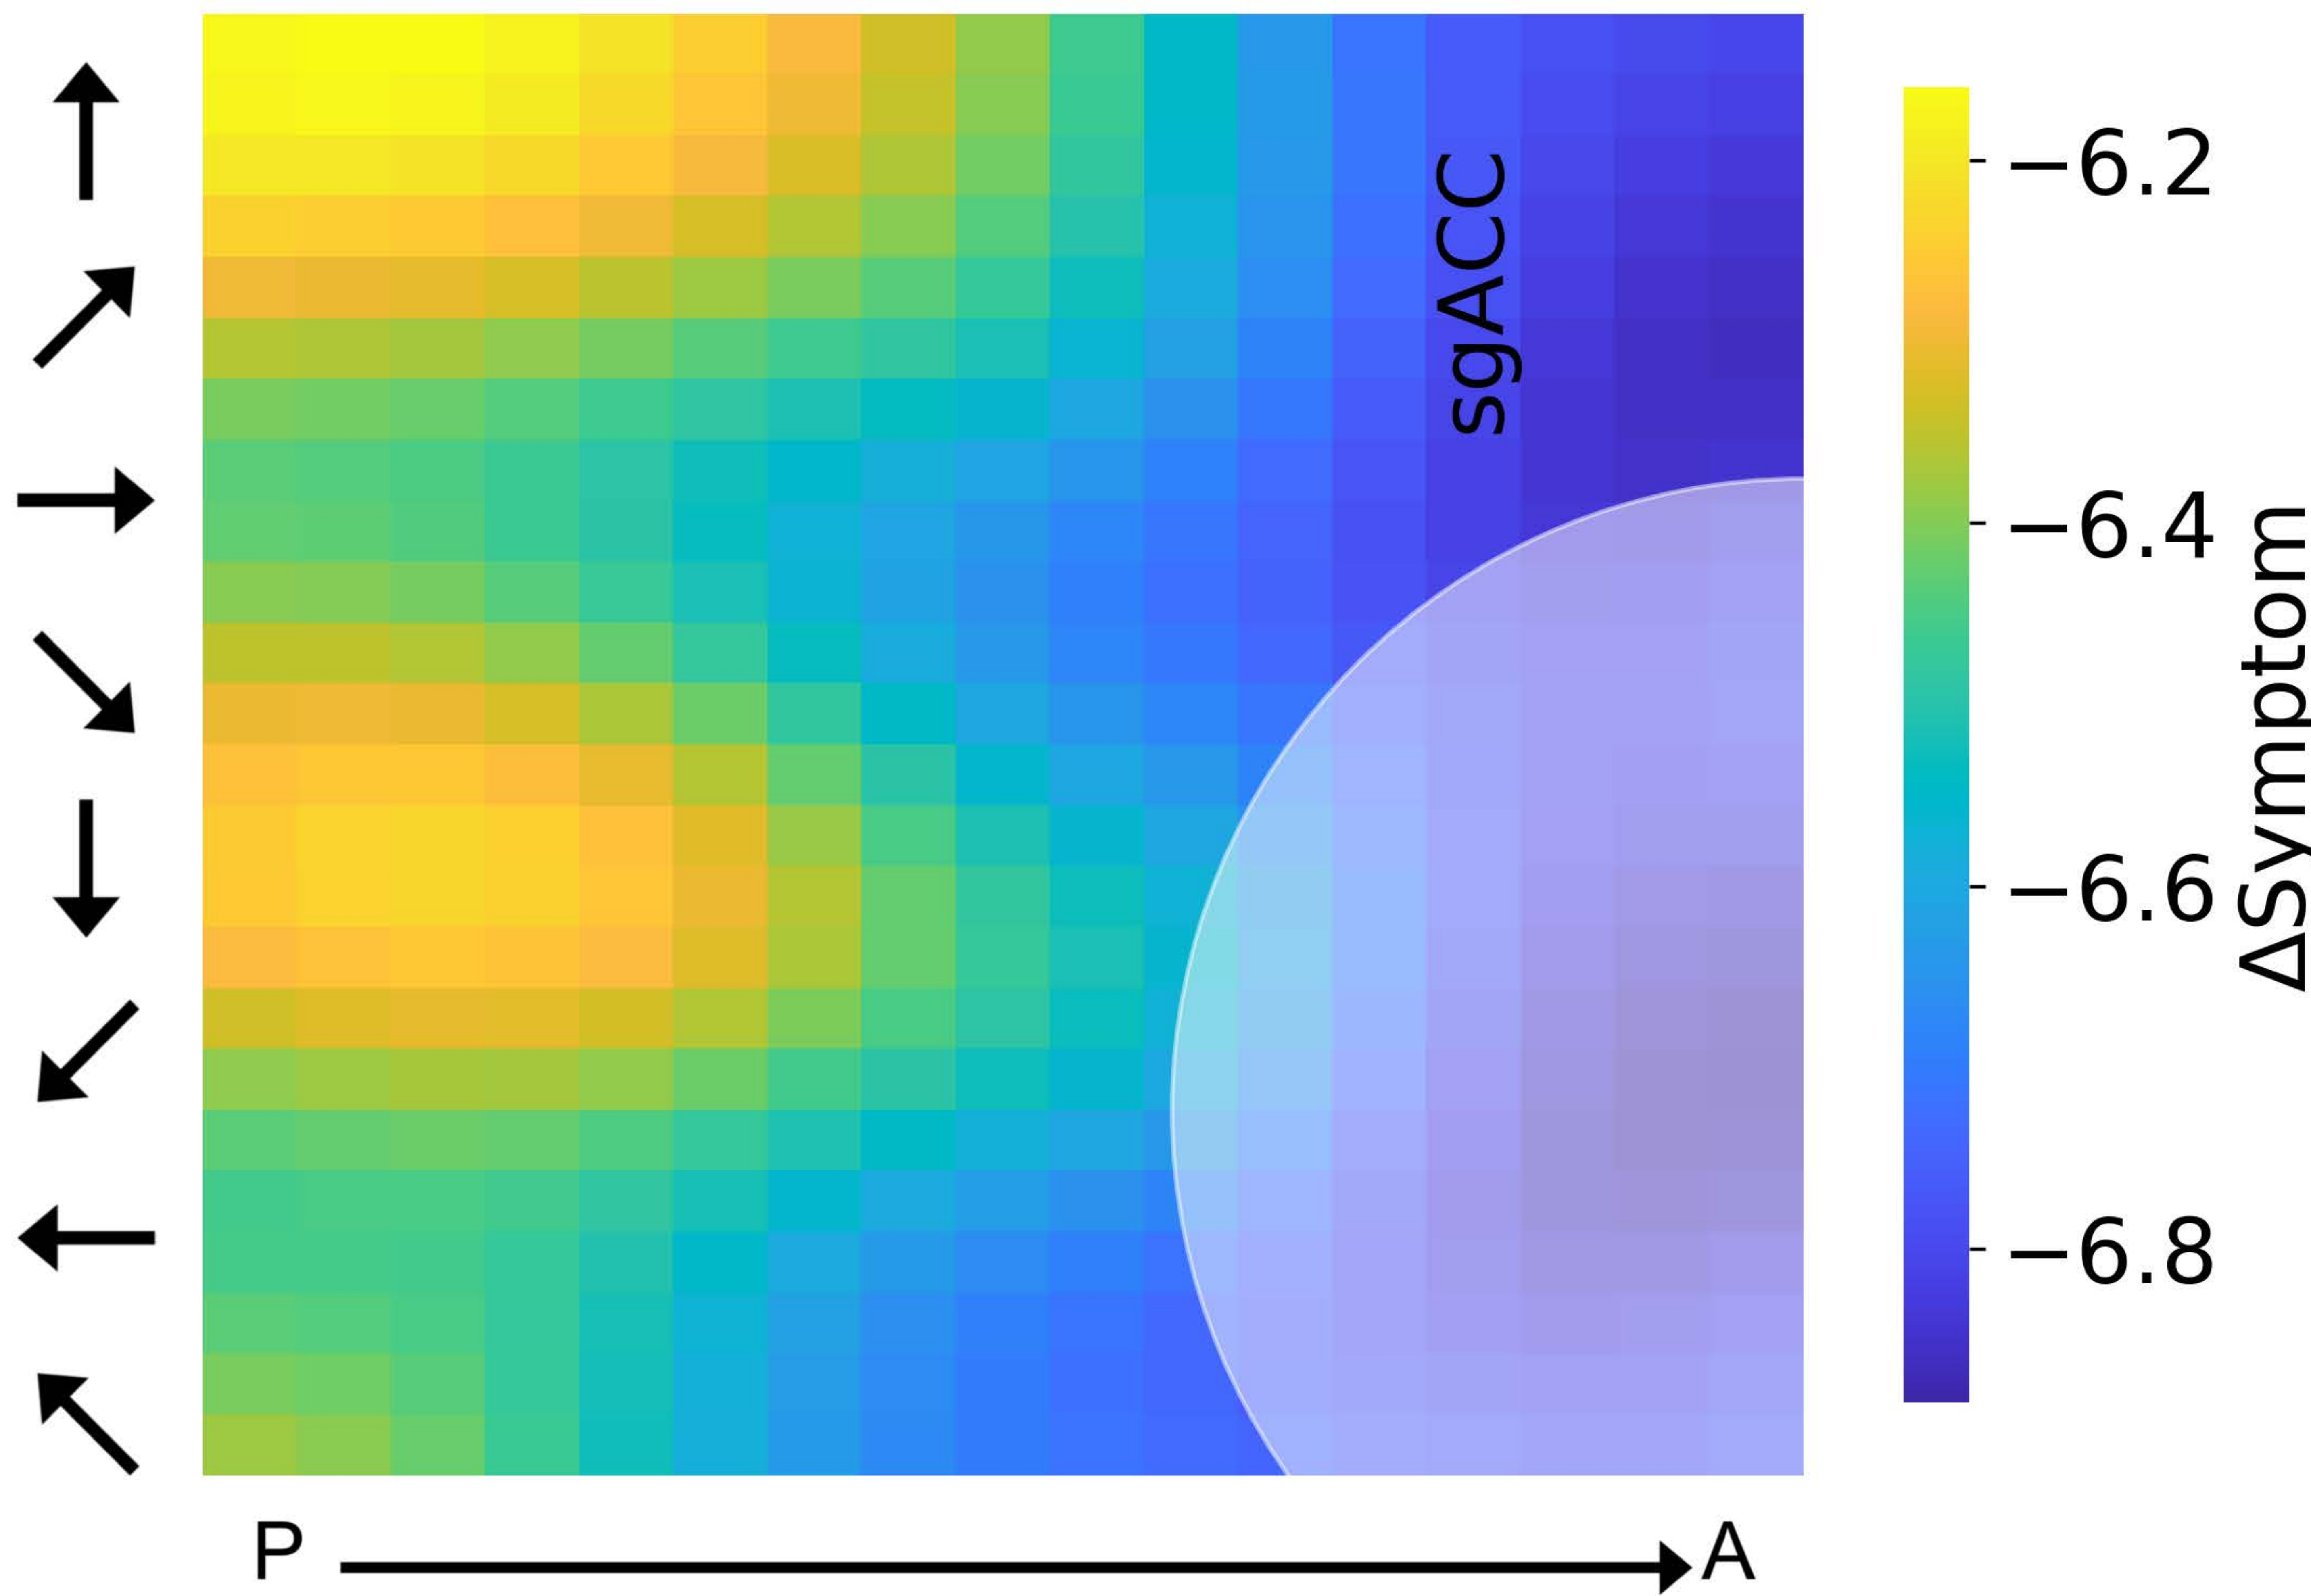



# NDARWJ818VXA\_hamd\_right\_dlpfc

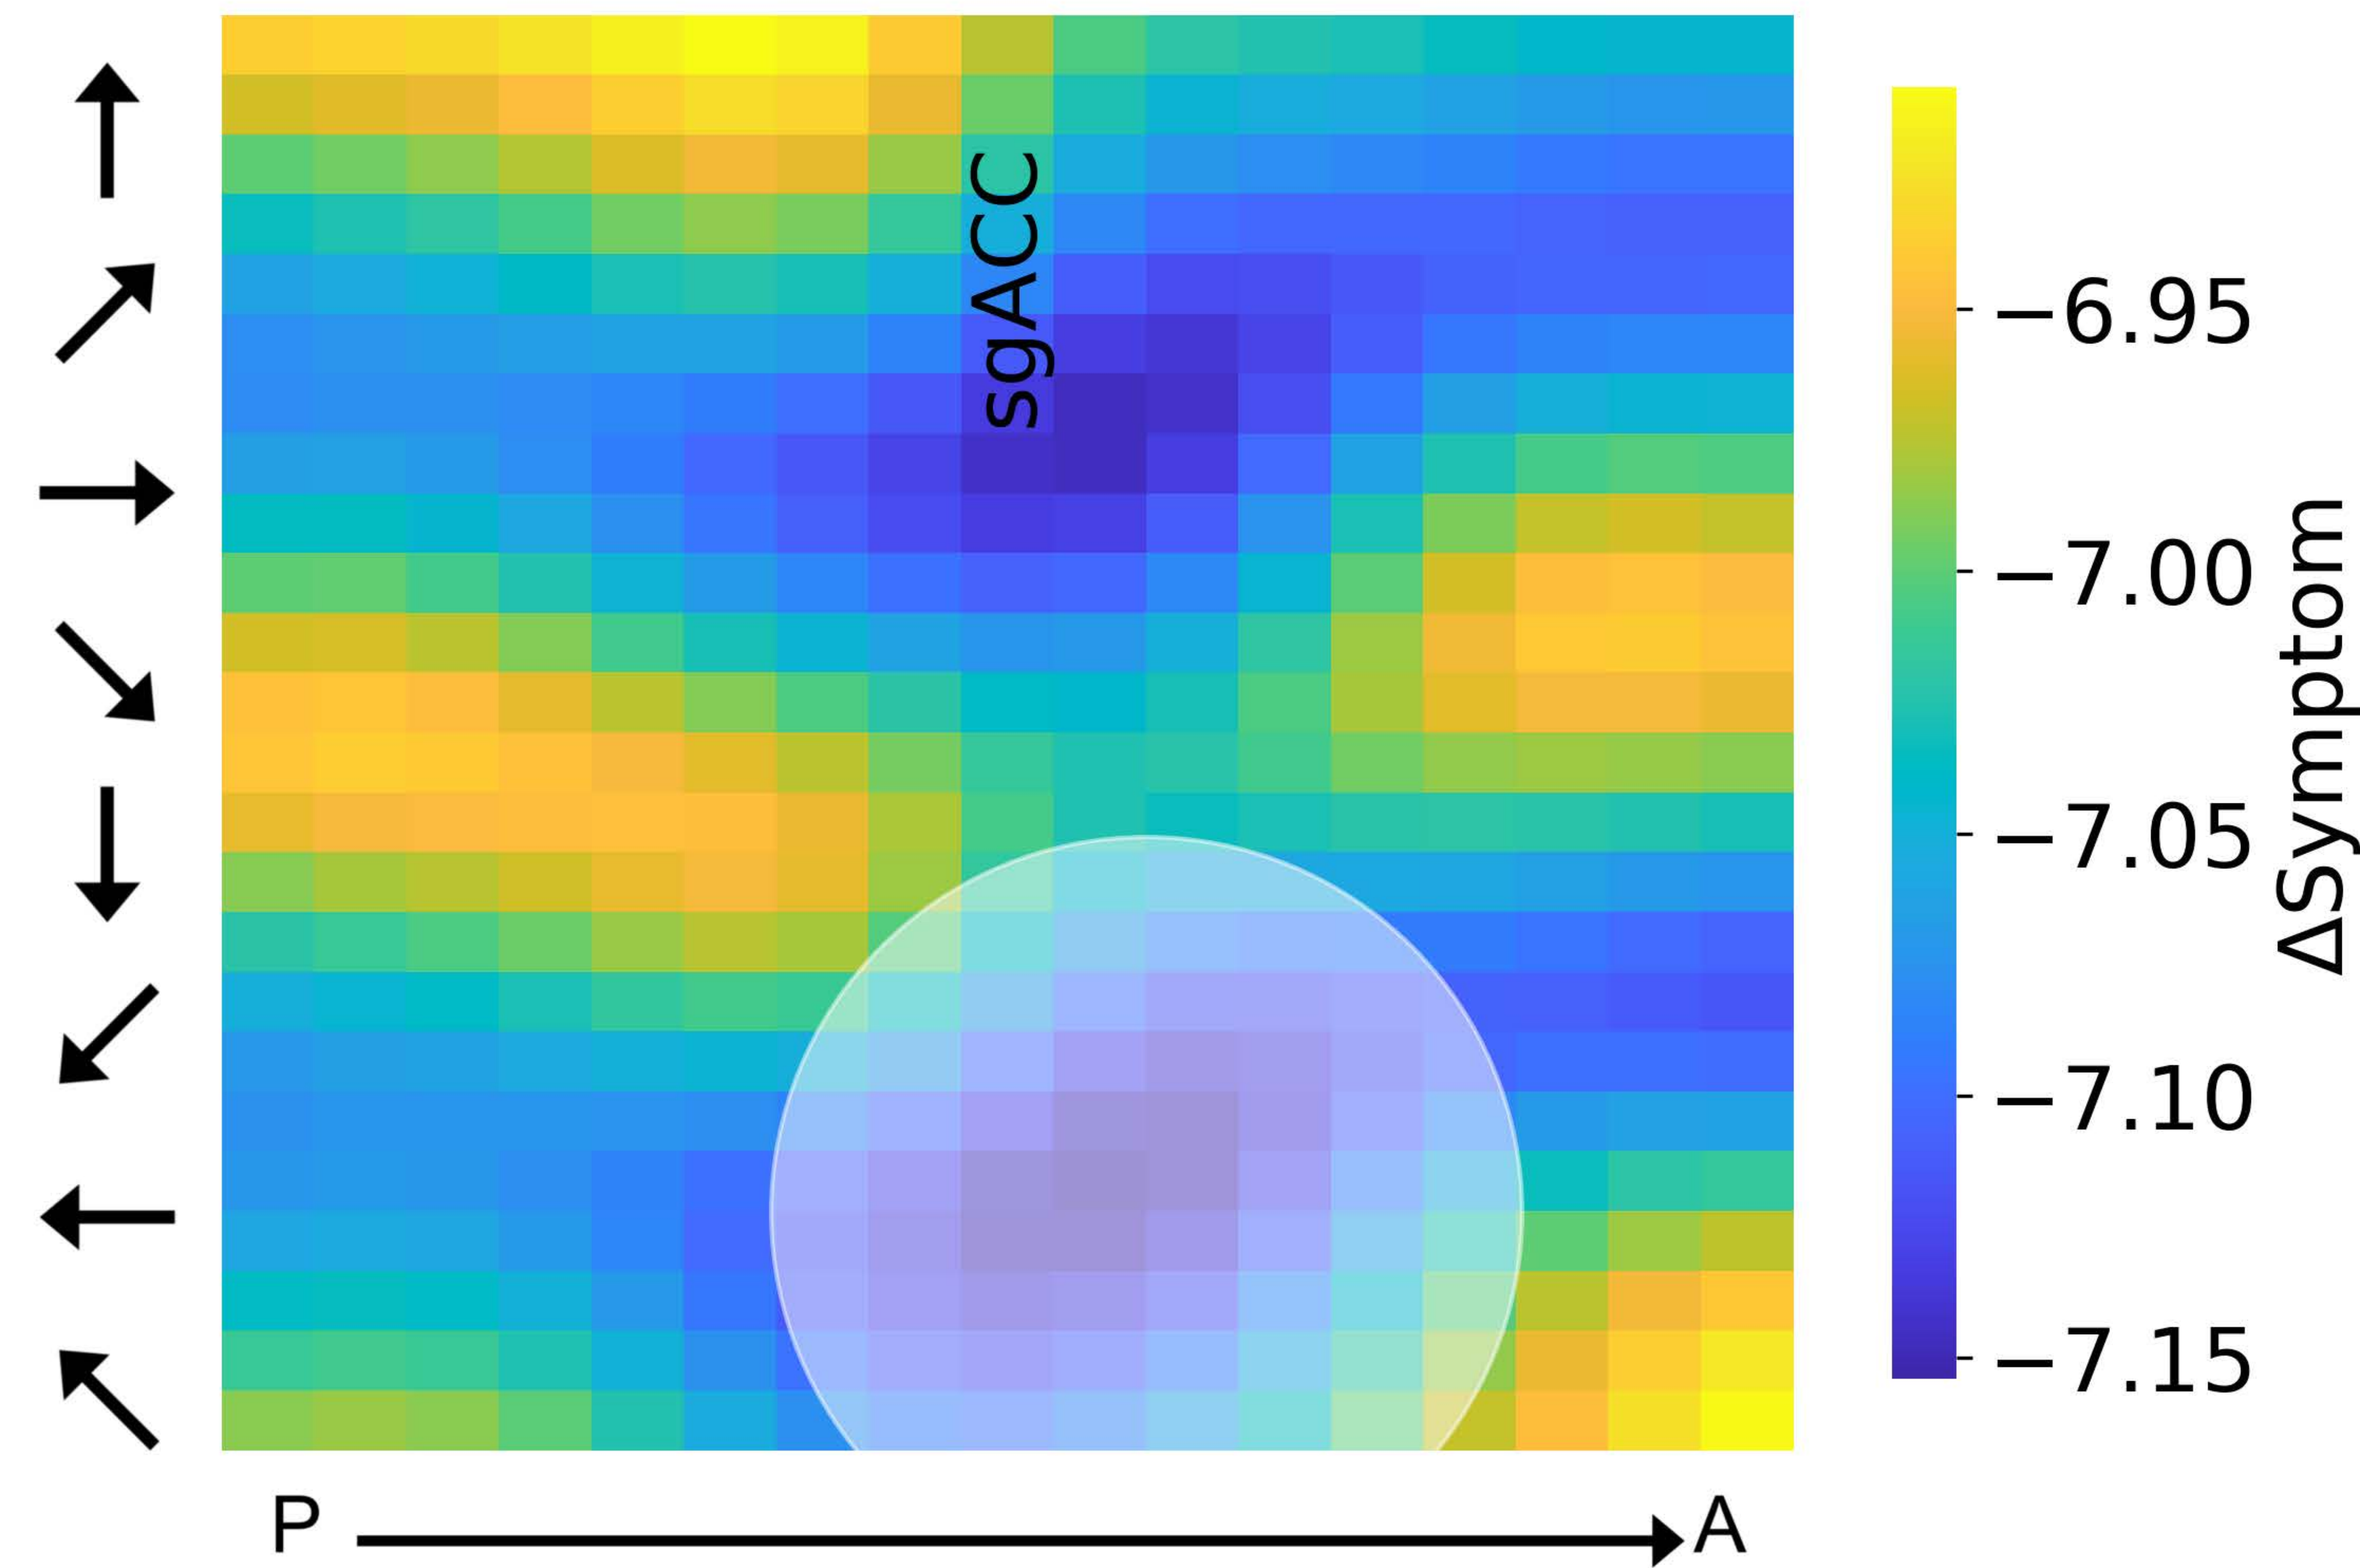



# INDARWK081NTV\_hamd\_right\_dlpfc

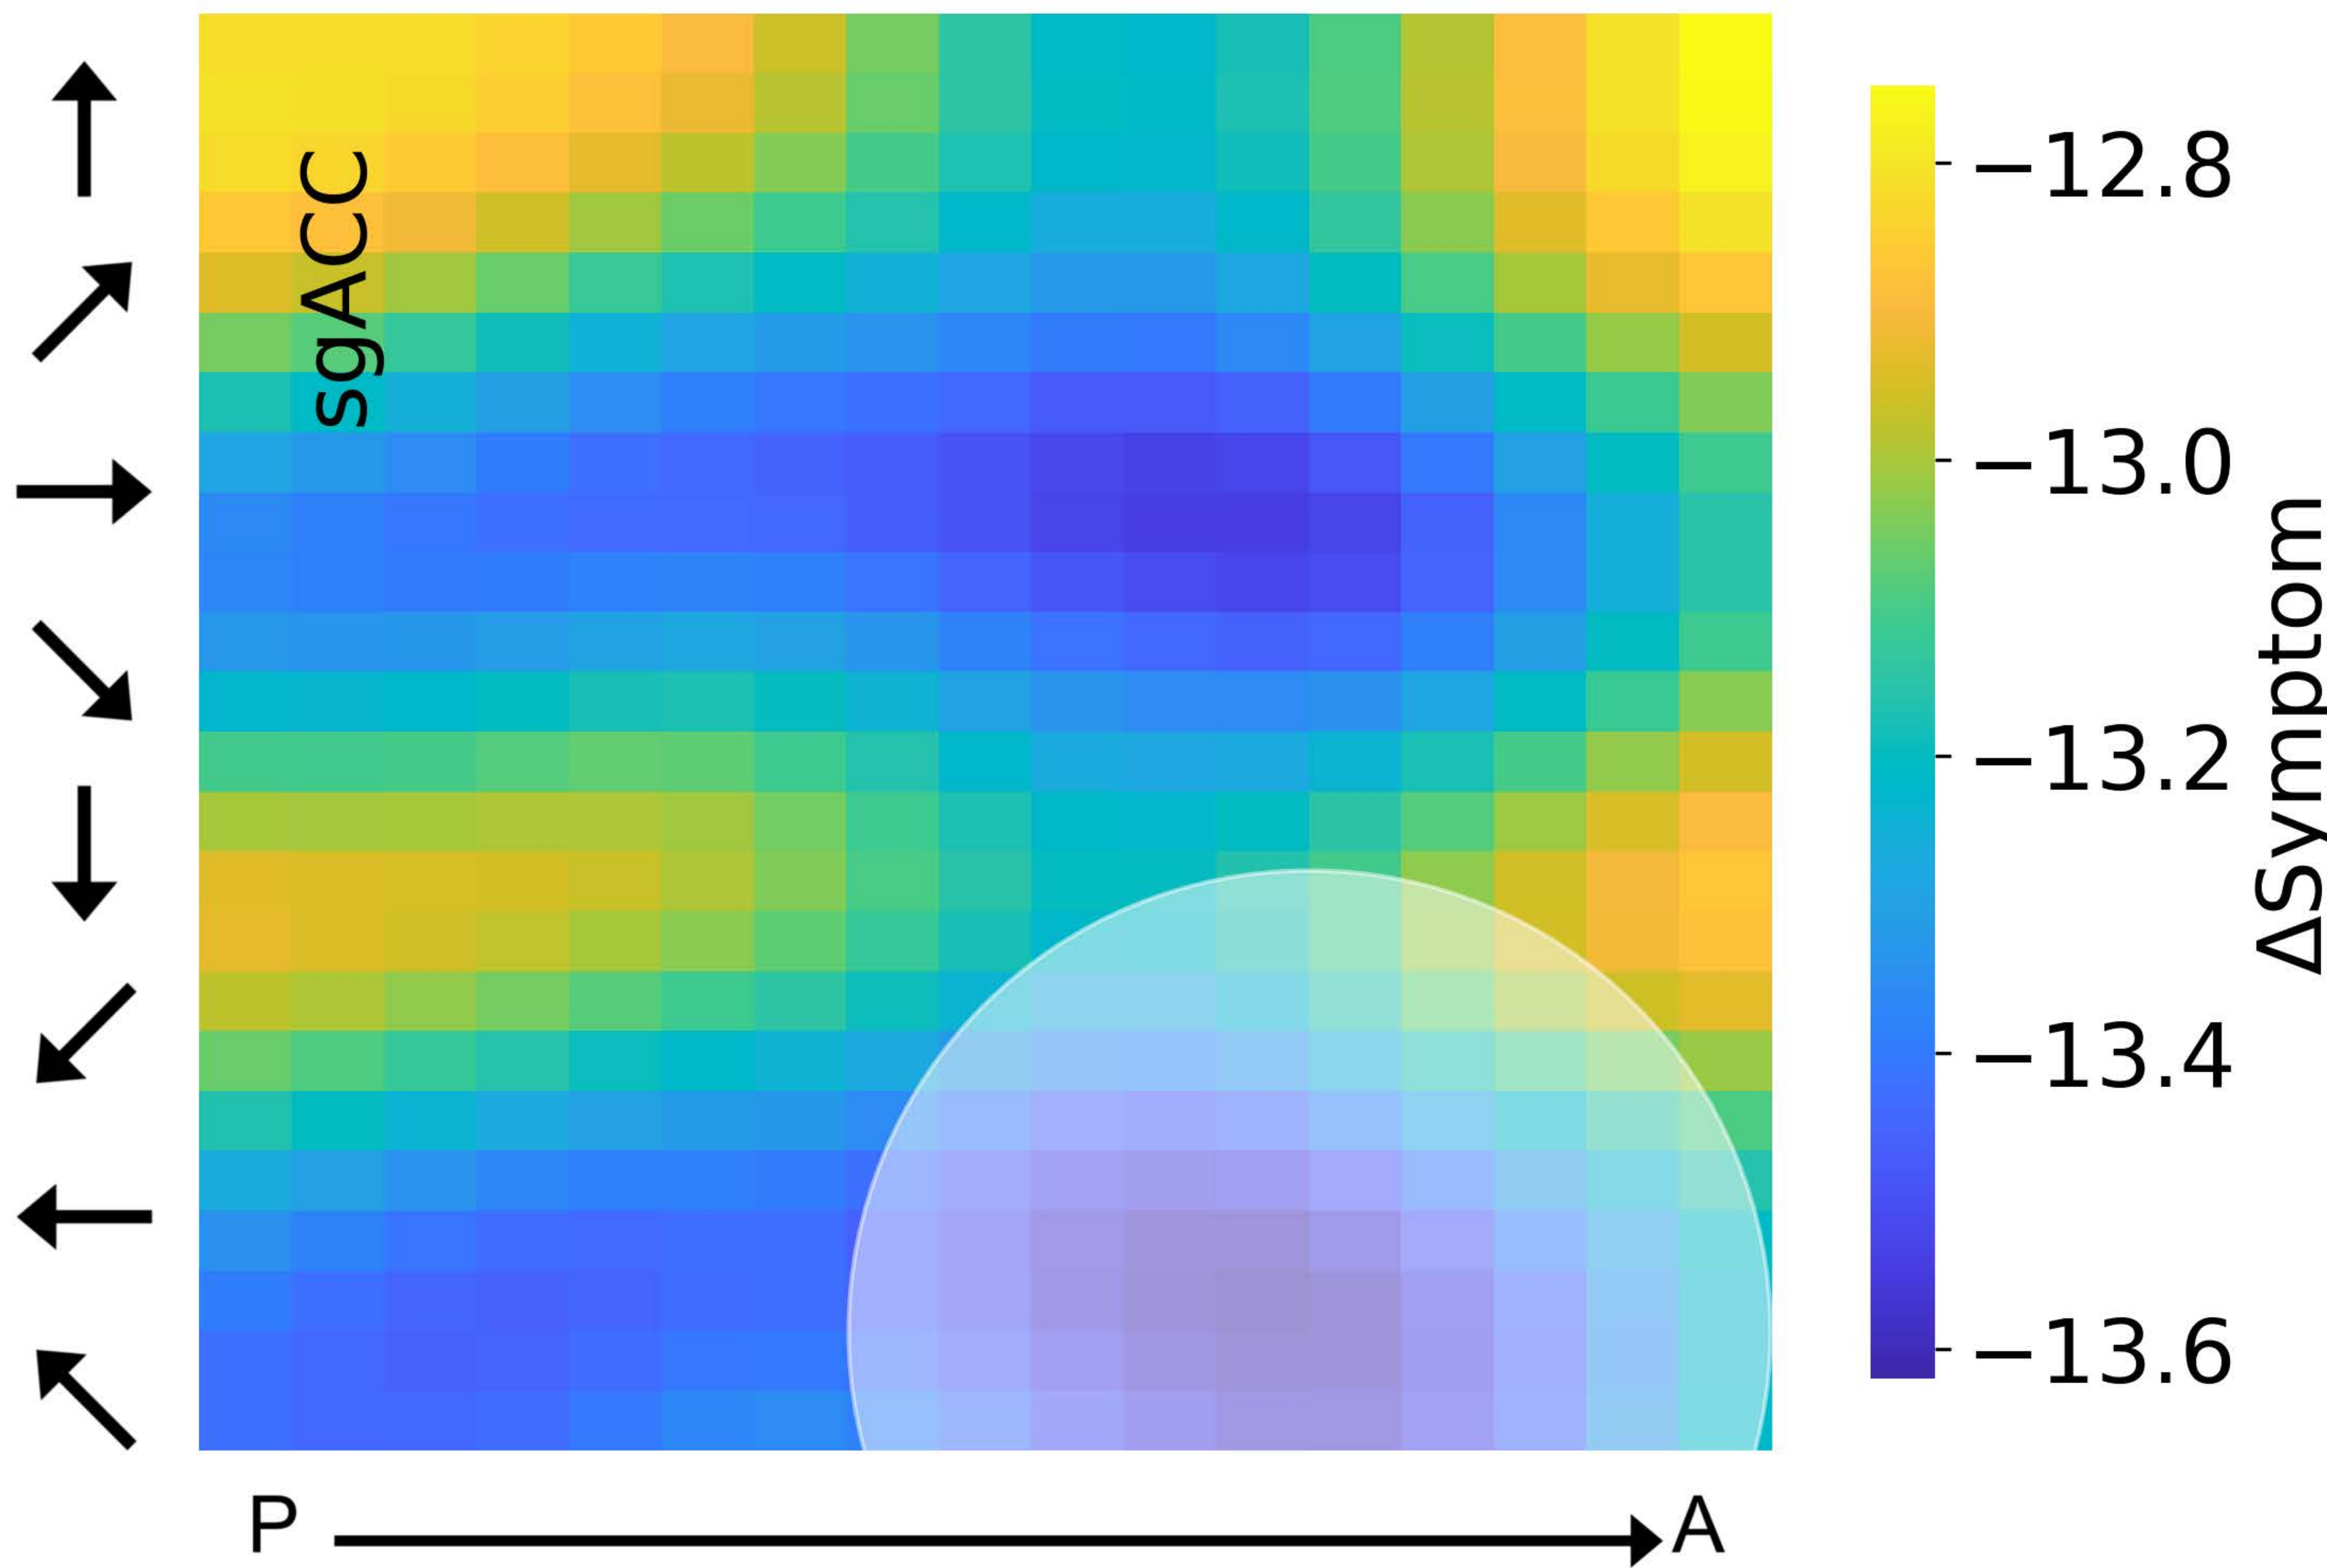



# INDARWL277NXF\_hamd\_right\_dlpfc

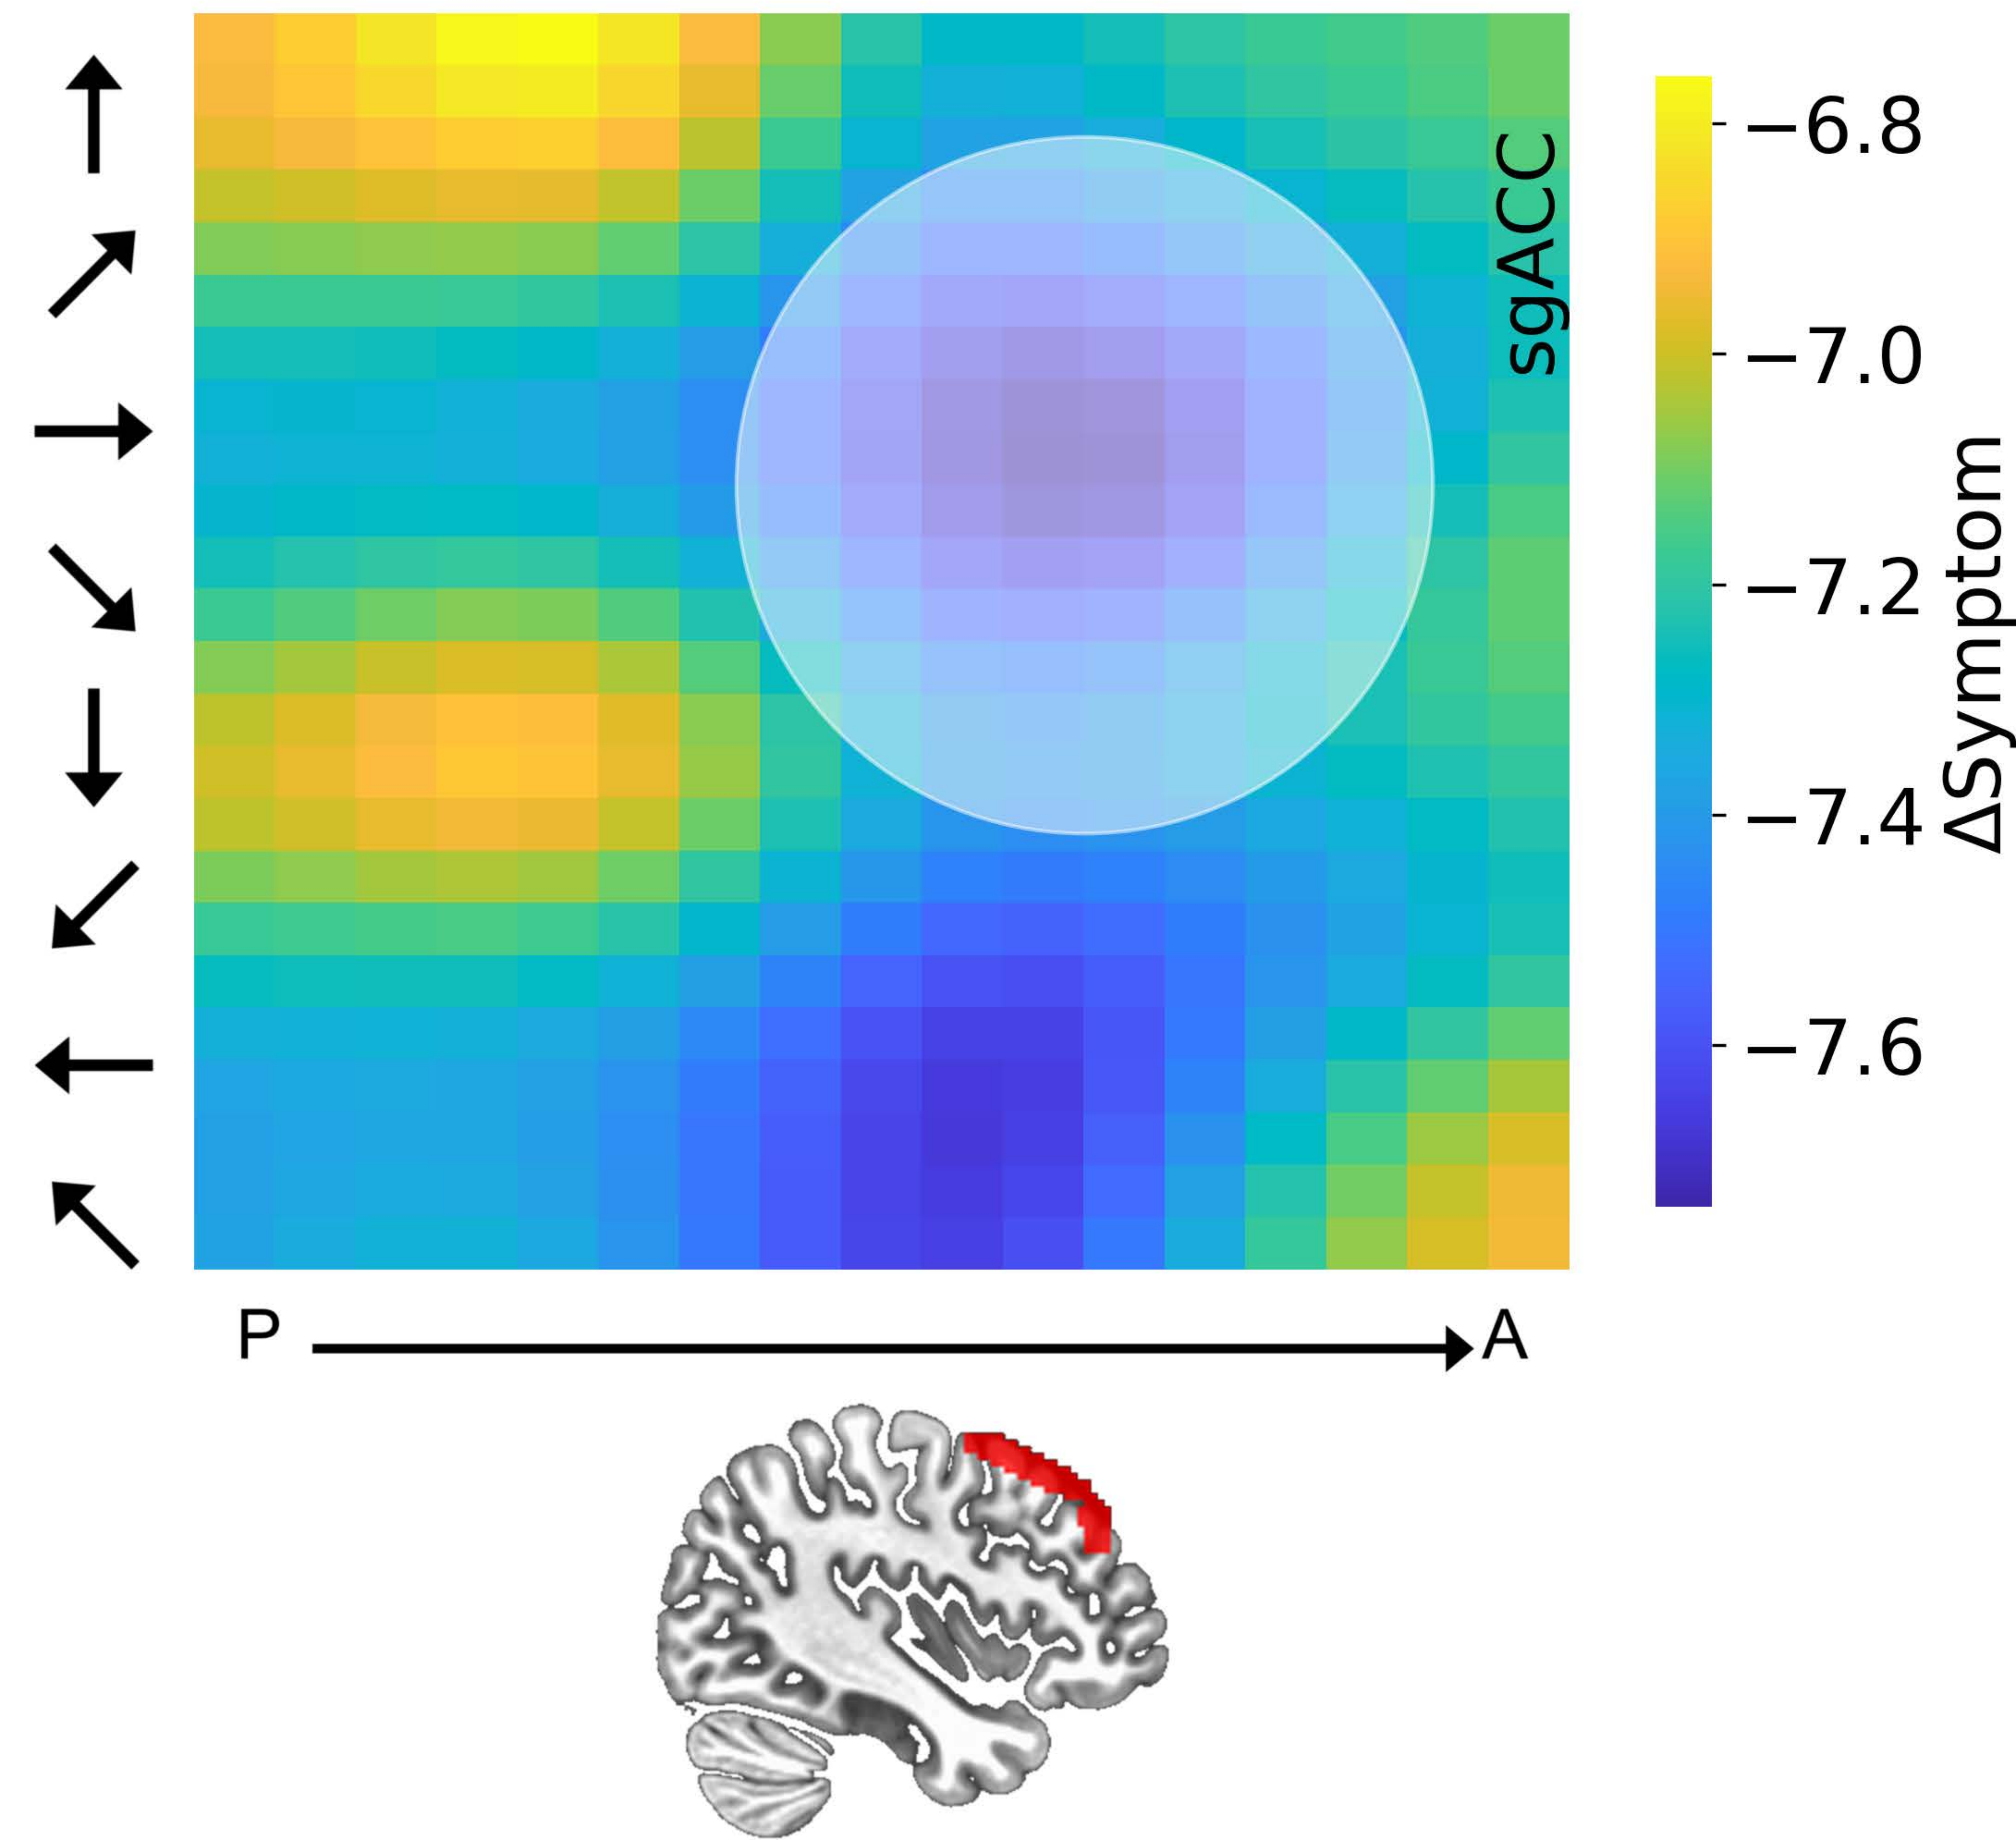



# INDARWV016ZAT\_hamd\_right\_dlpfc

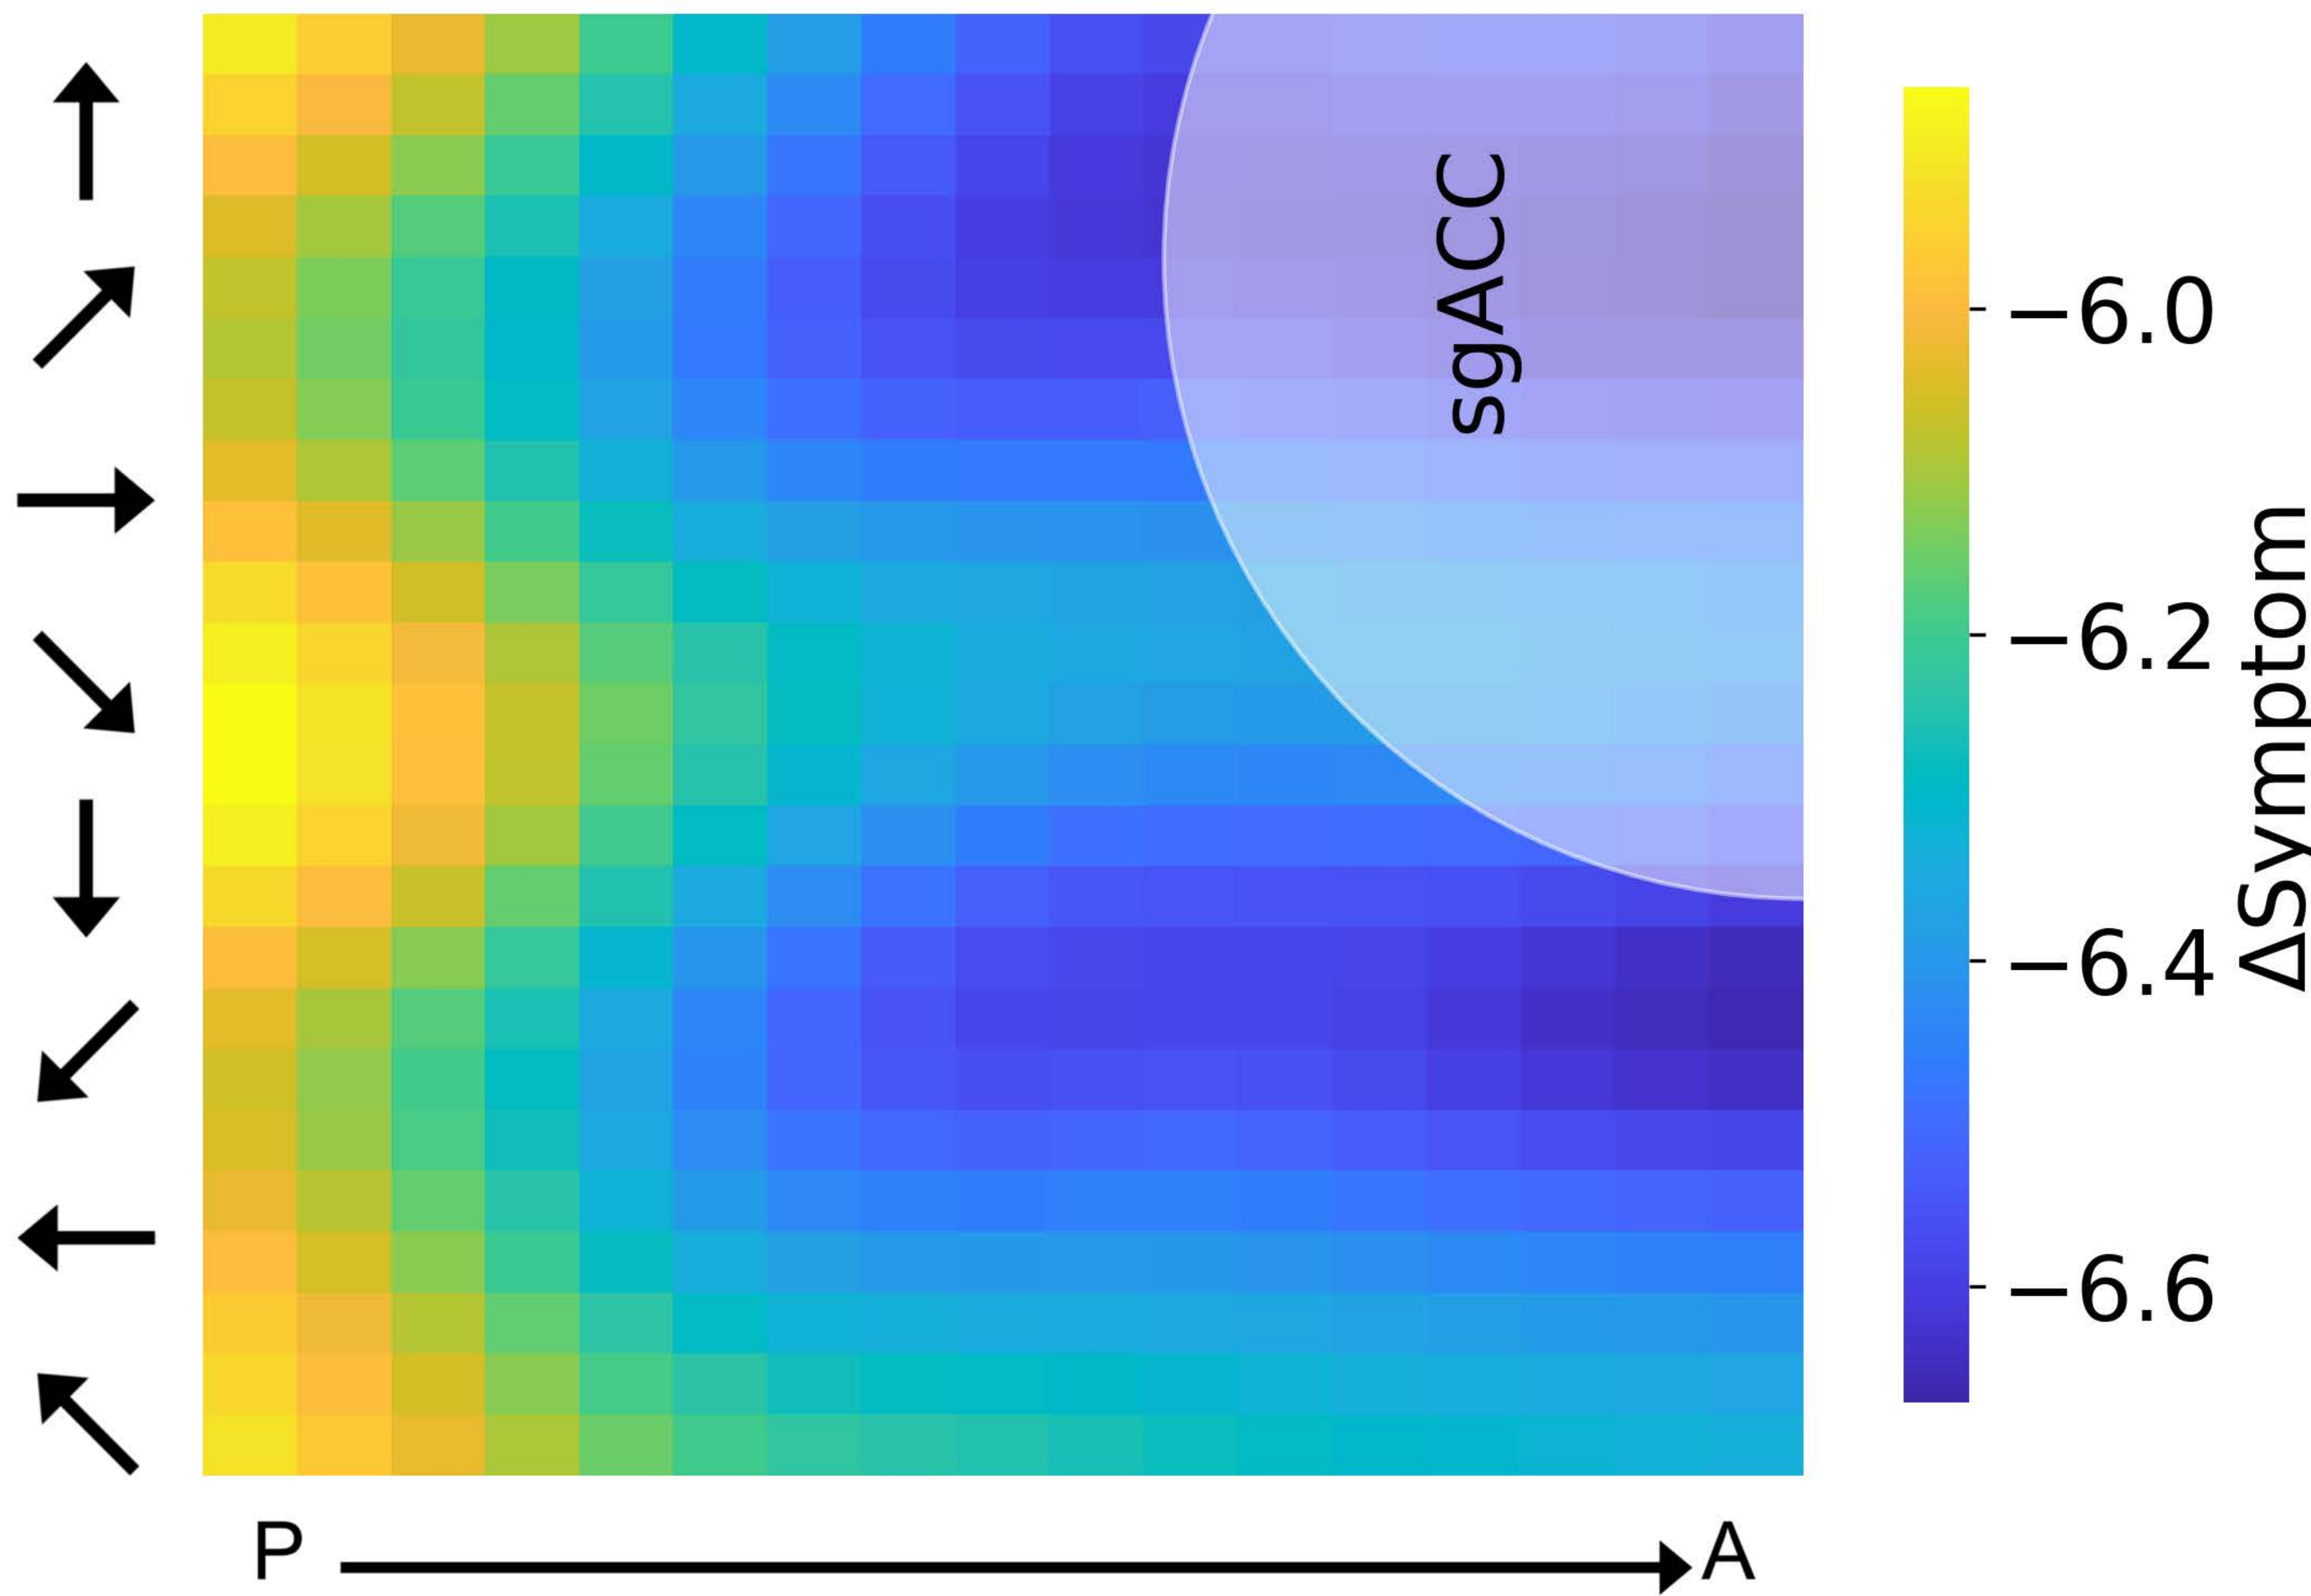



# NDARXA148KPL\_hamd\_right\_dlpfc

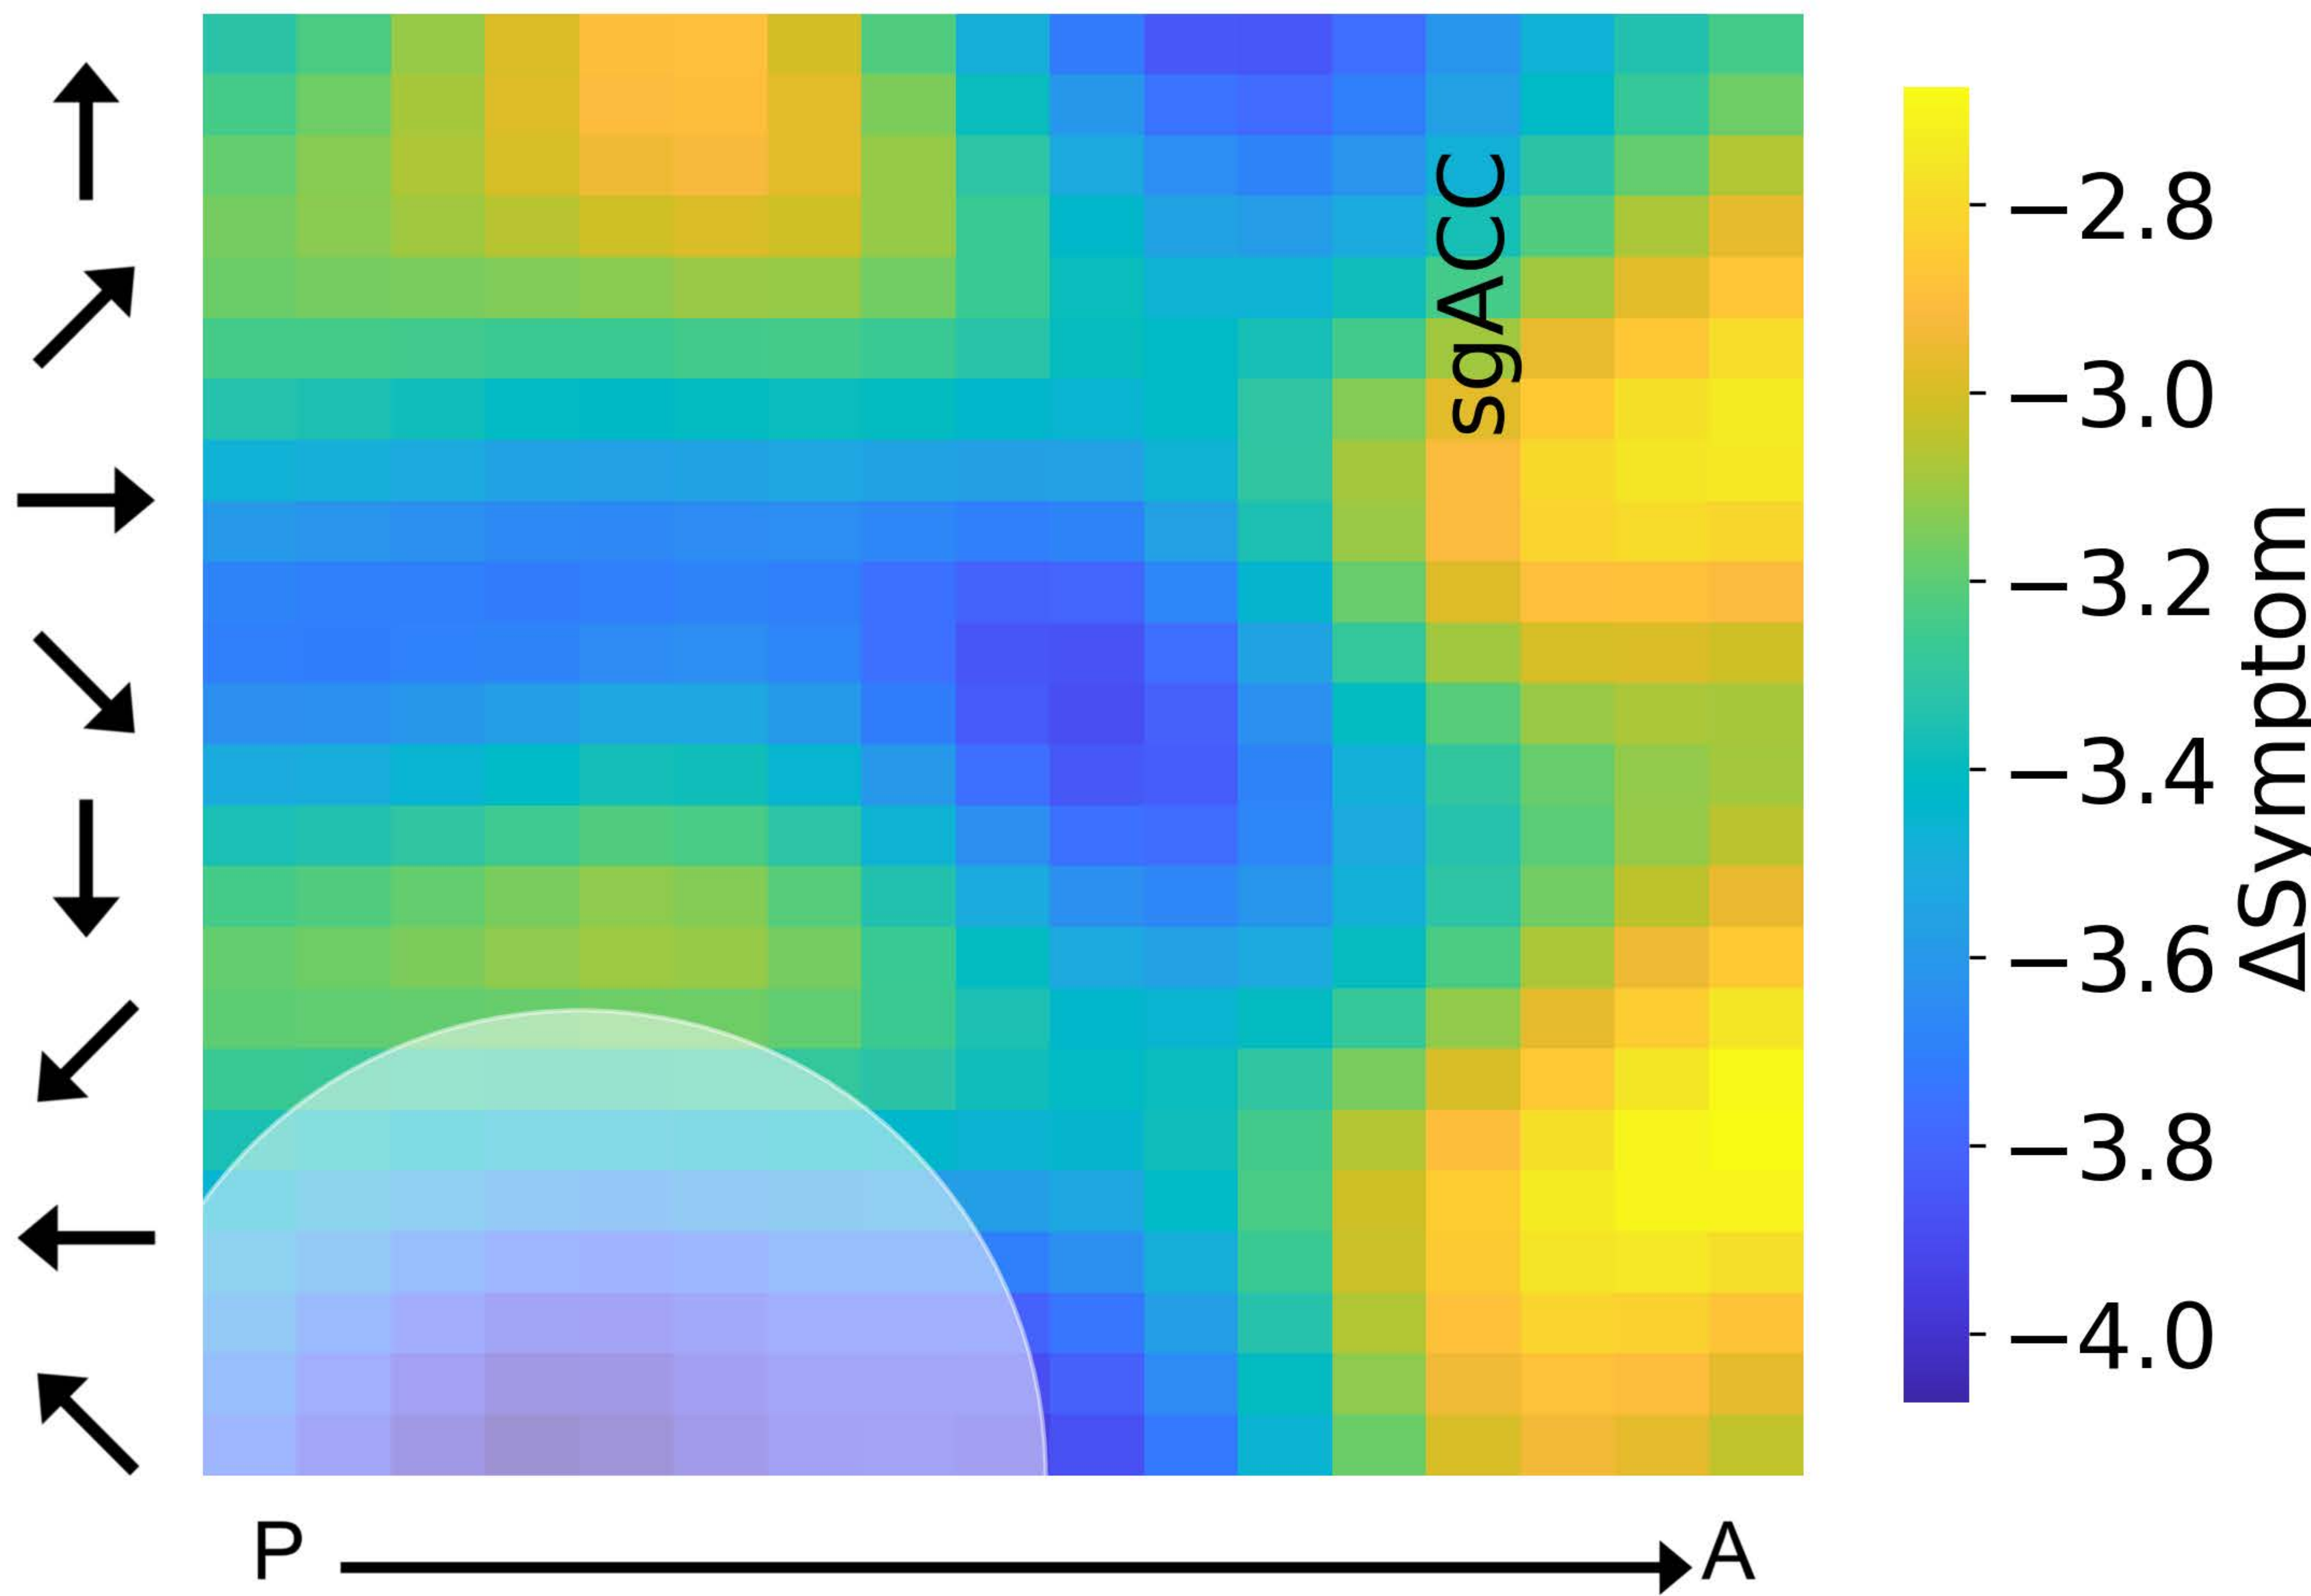



# INDARXD921NRV\_hamd\_right\_dlpfc

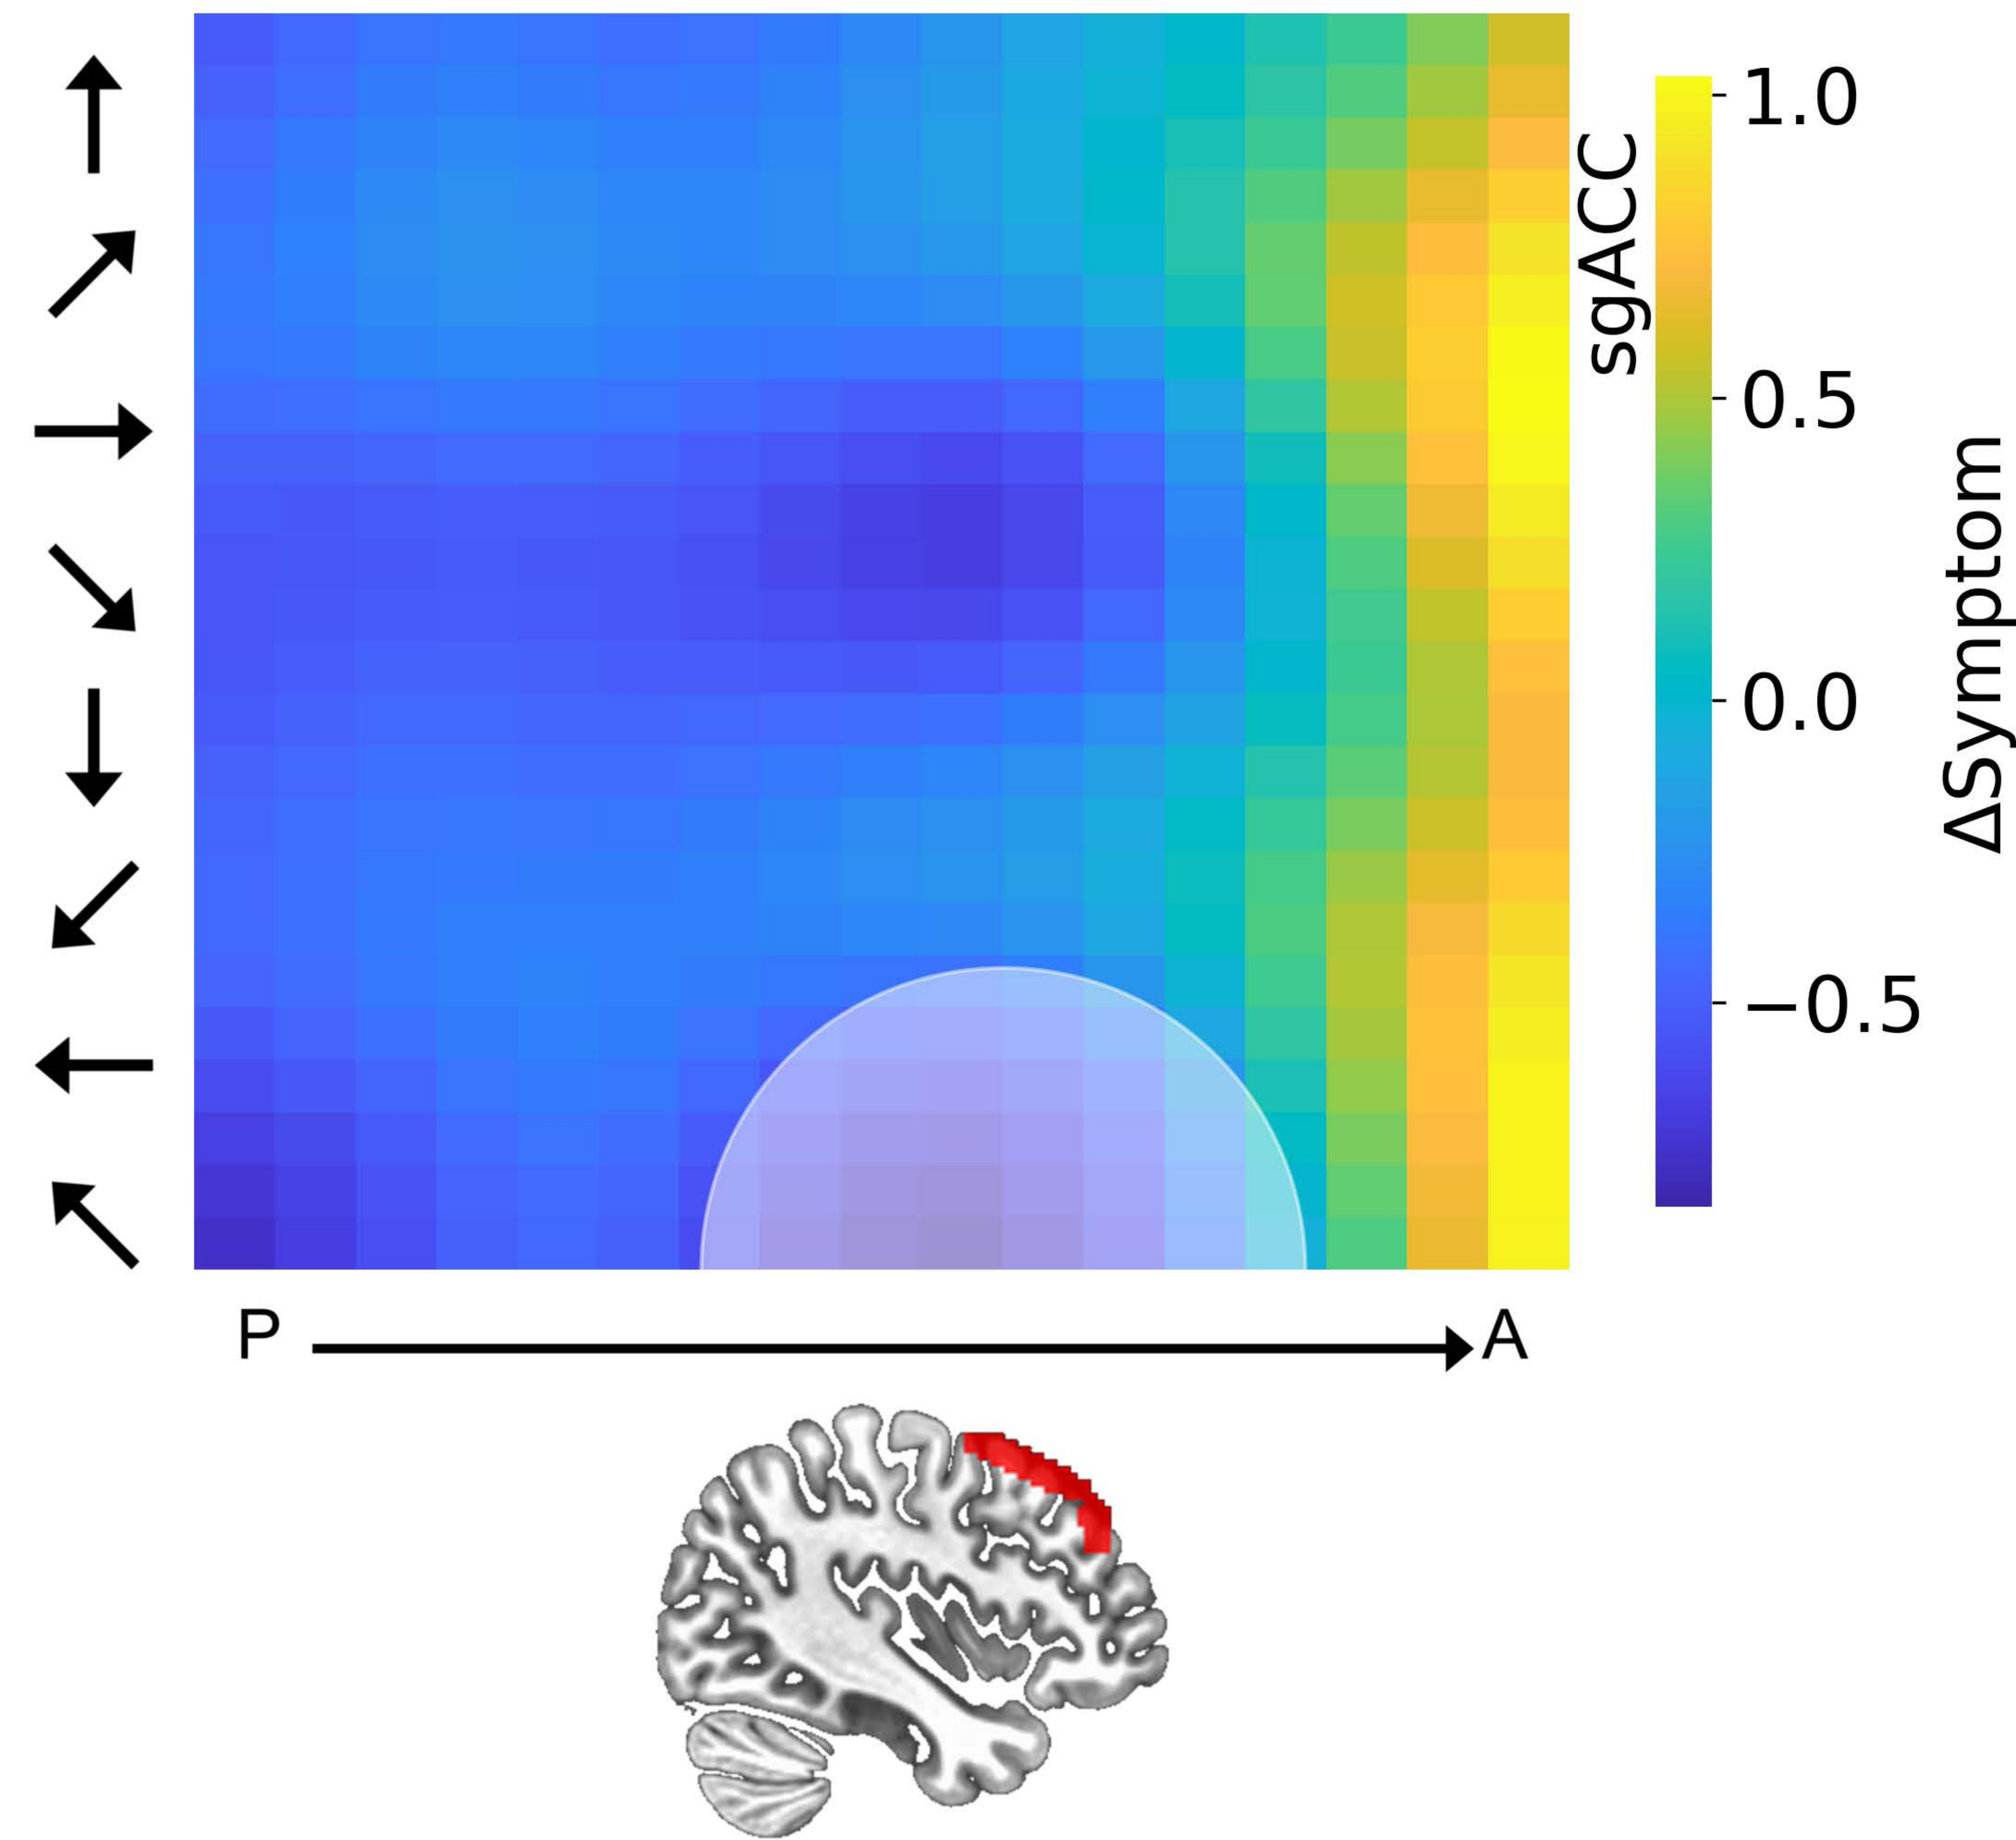



# INDARXU500EFT\_hamd\_right\_dlpfc

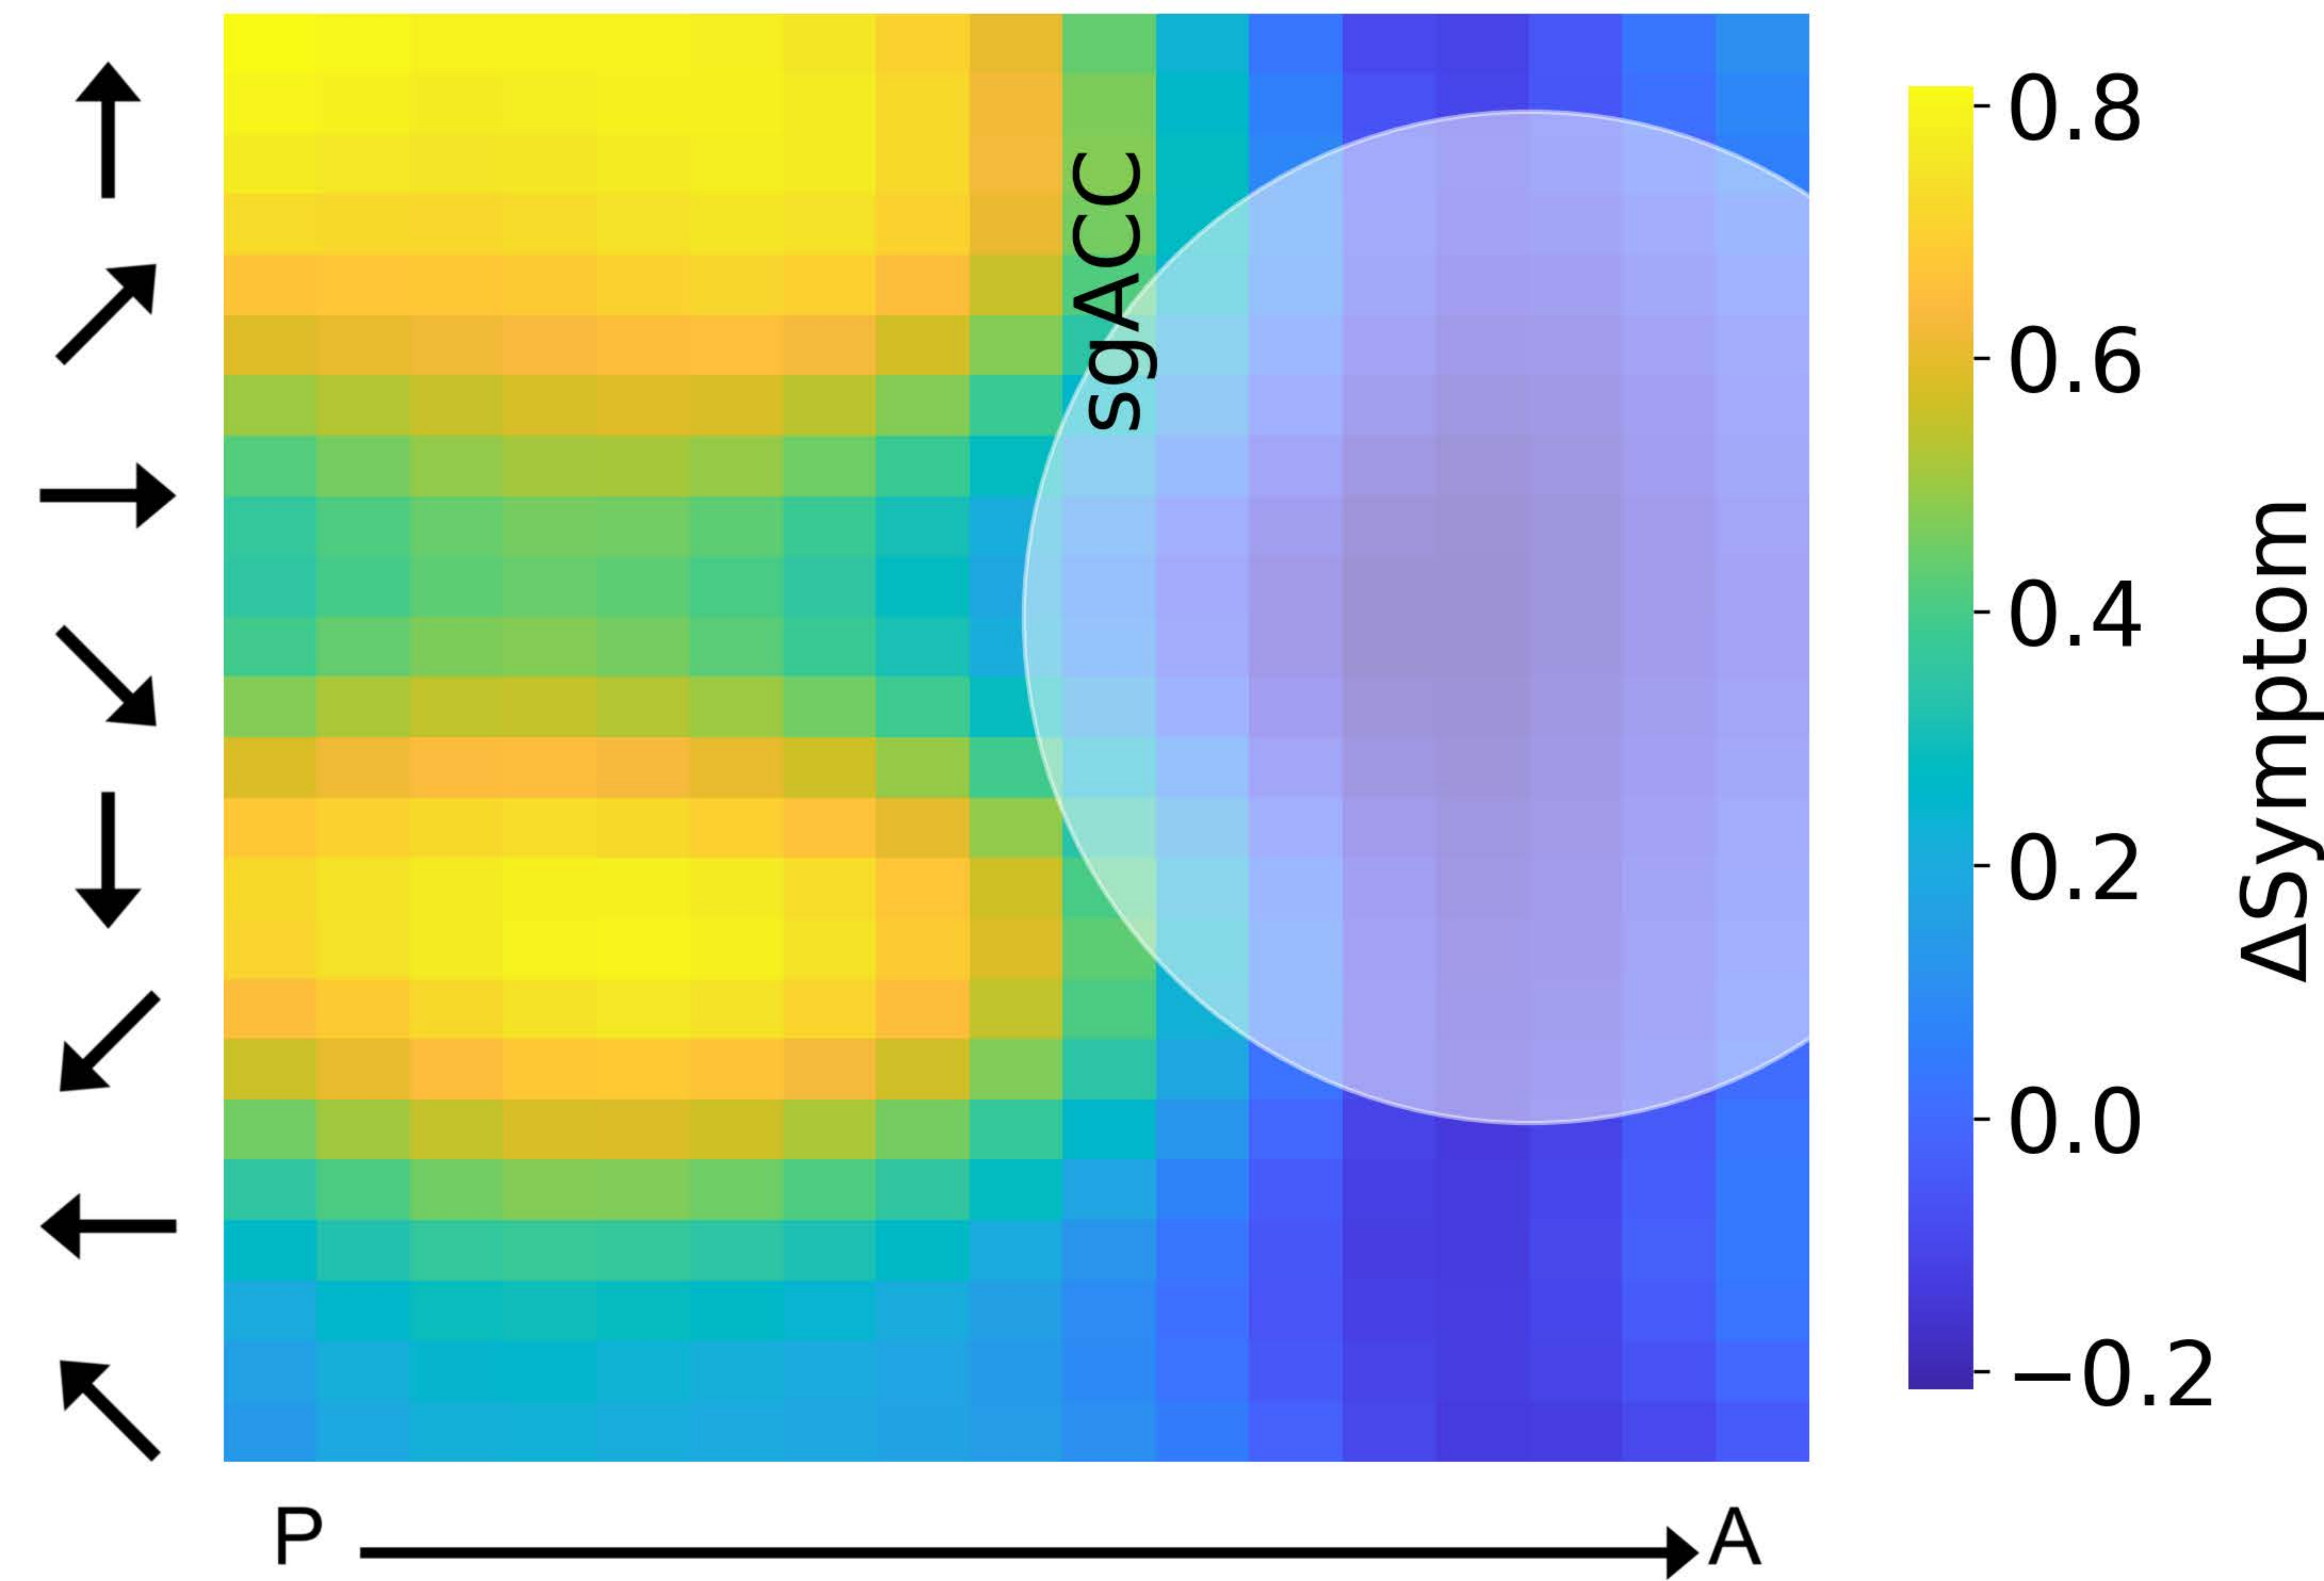



# INDARYB181GTB\_hamd\_right\_dlpfc

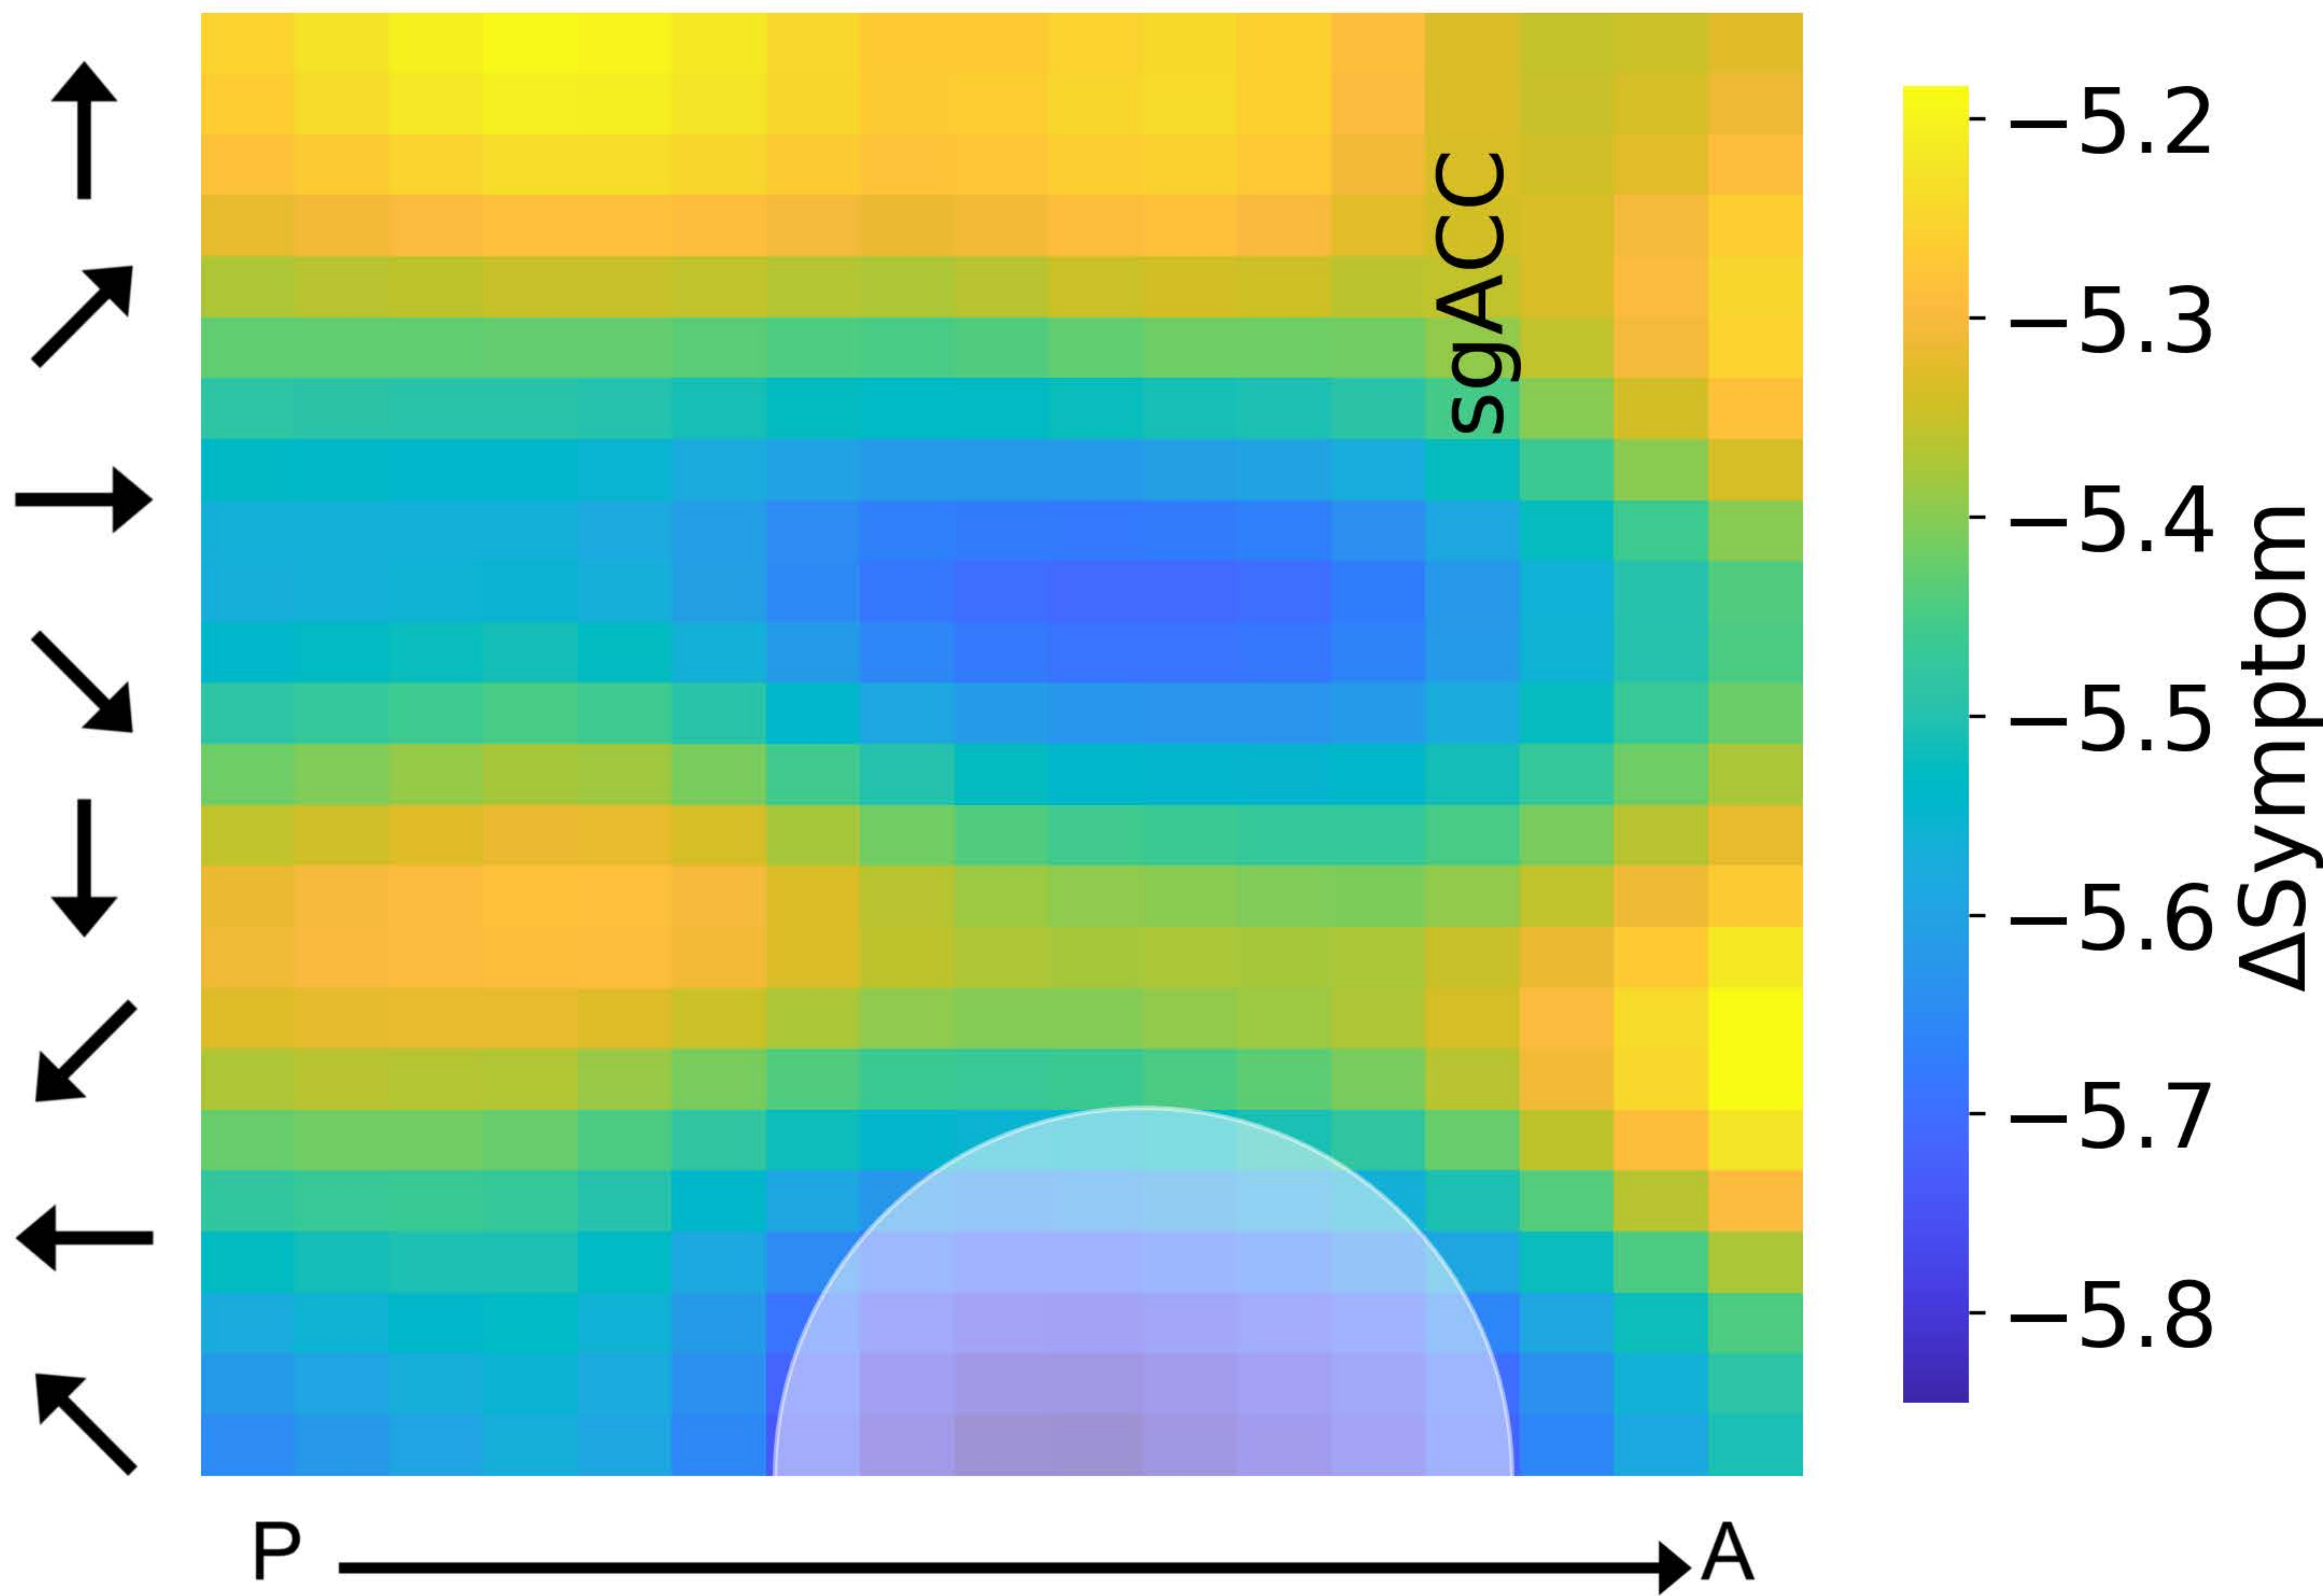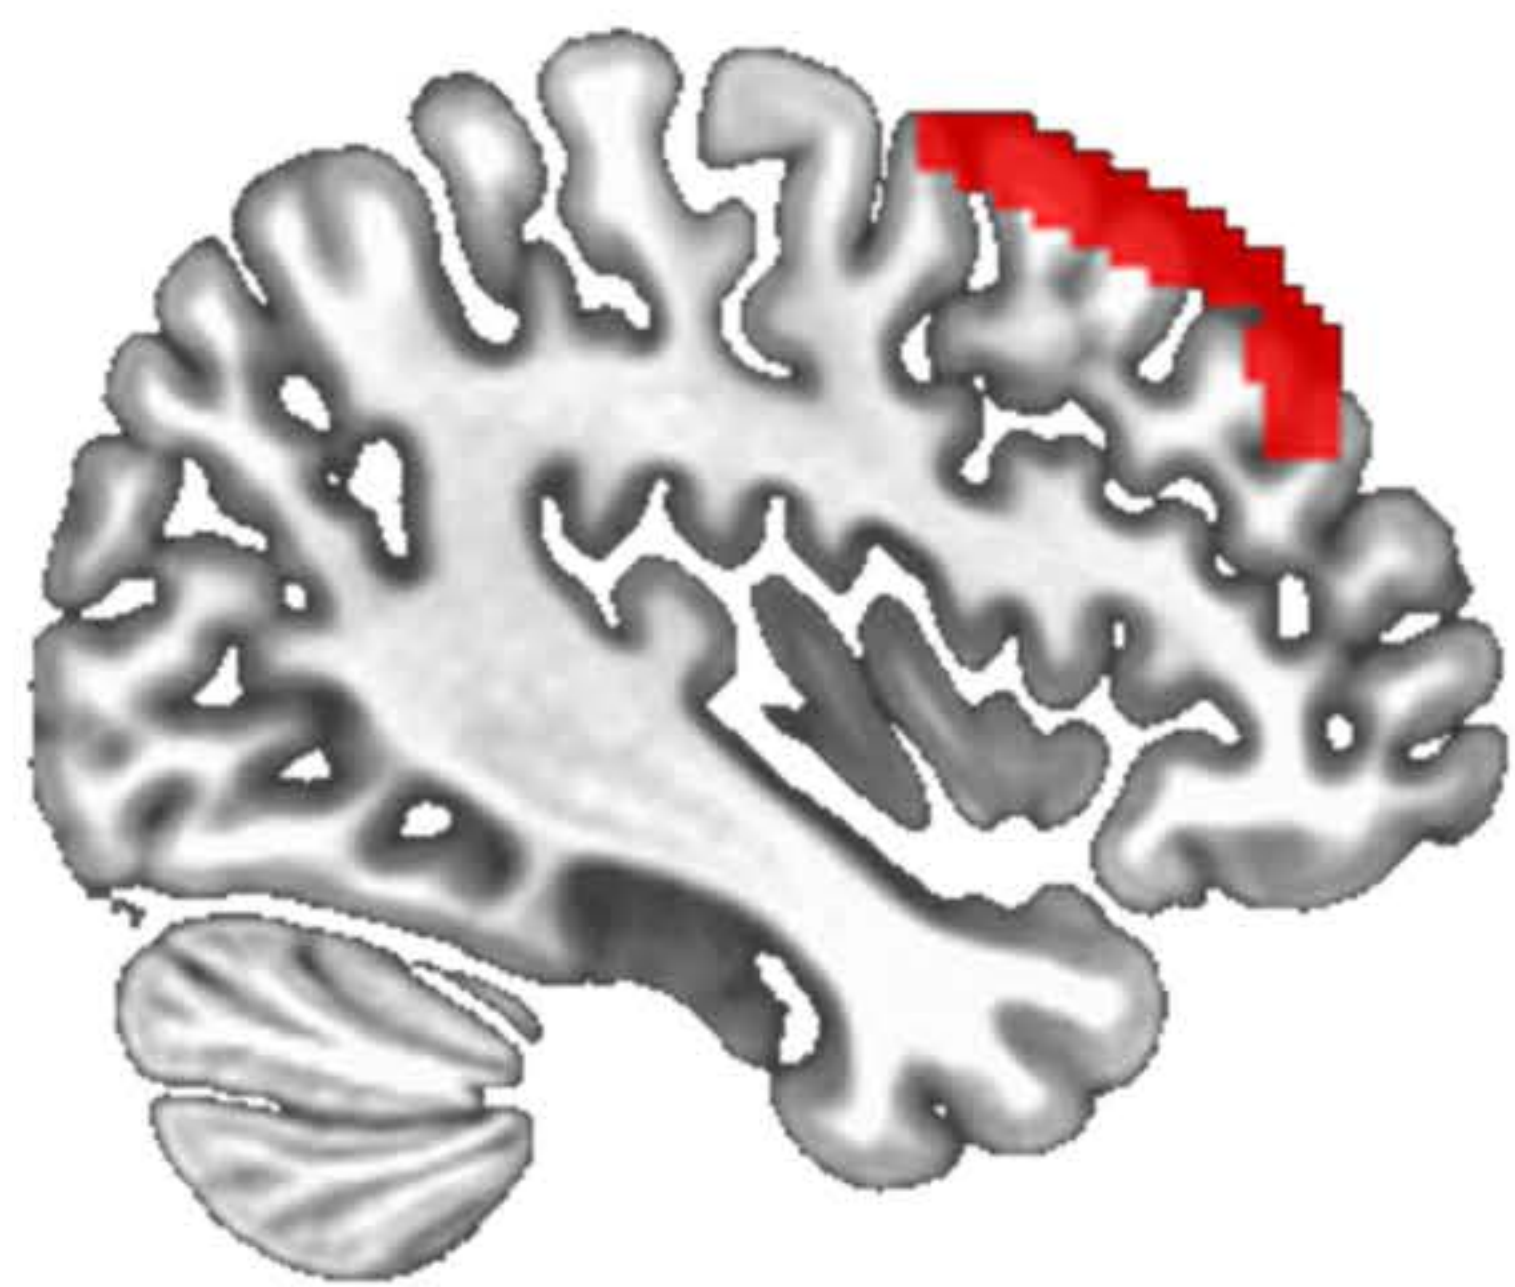



# NDARYD169AYQ\_hamd\_right\_dlpfc

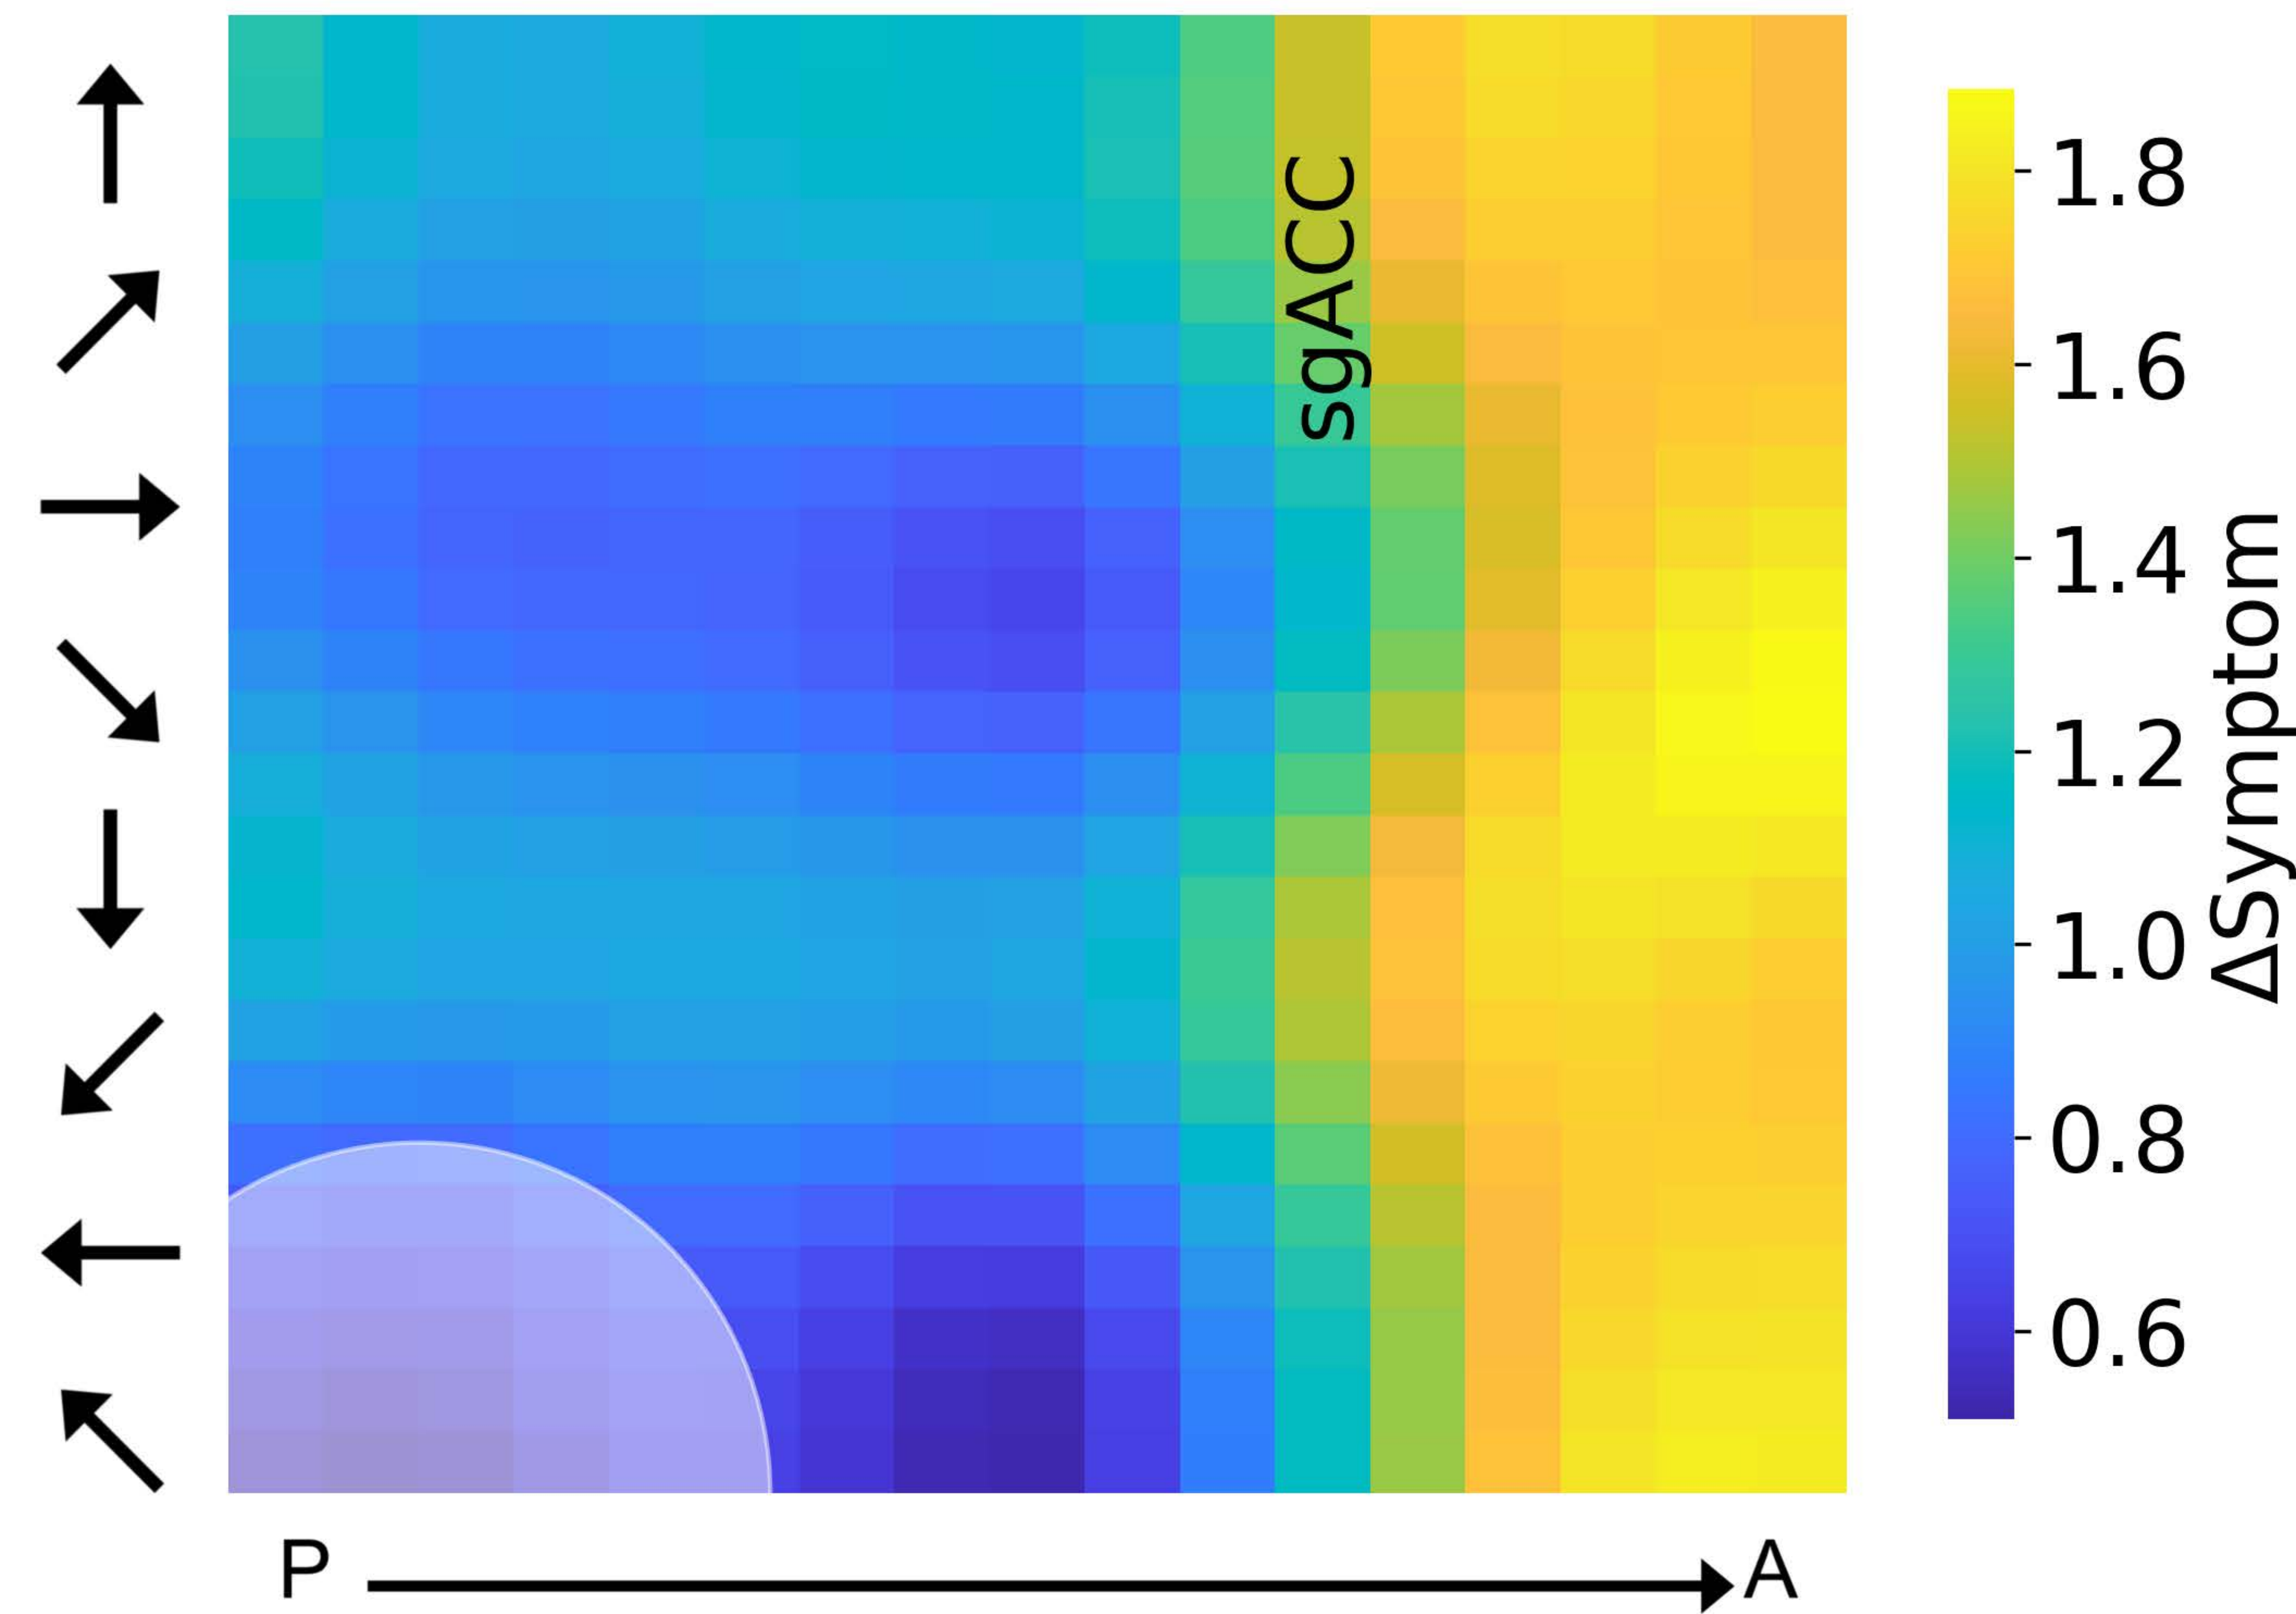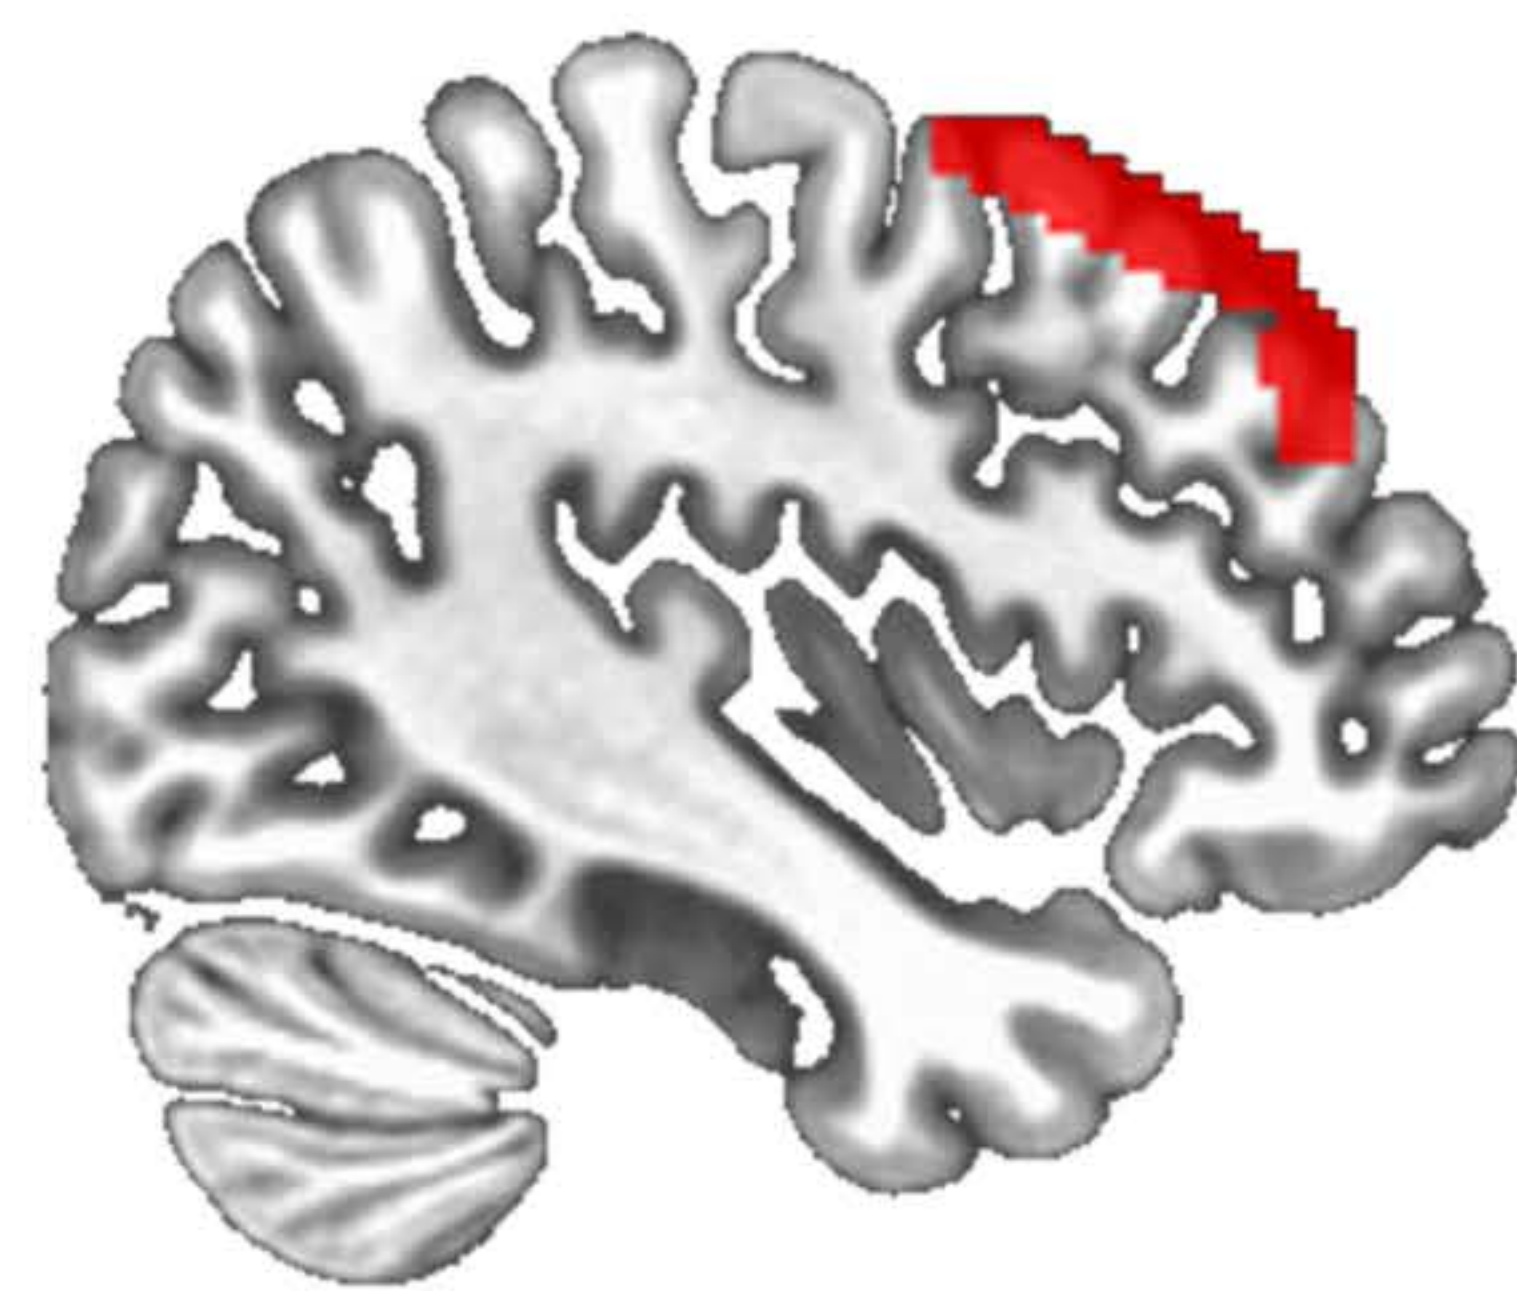



# NDARYE405JJL\_hamd\_right\_dlpfc

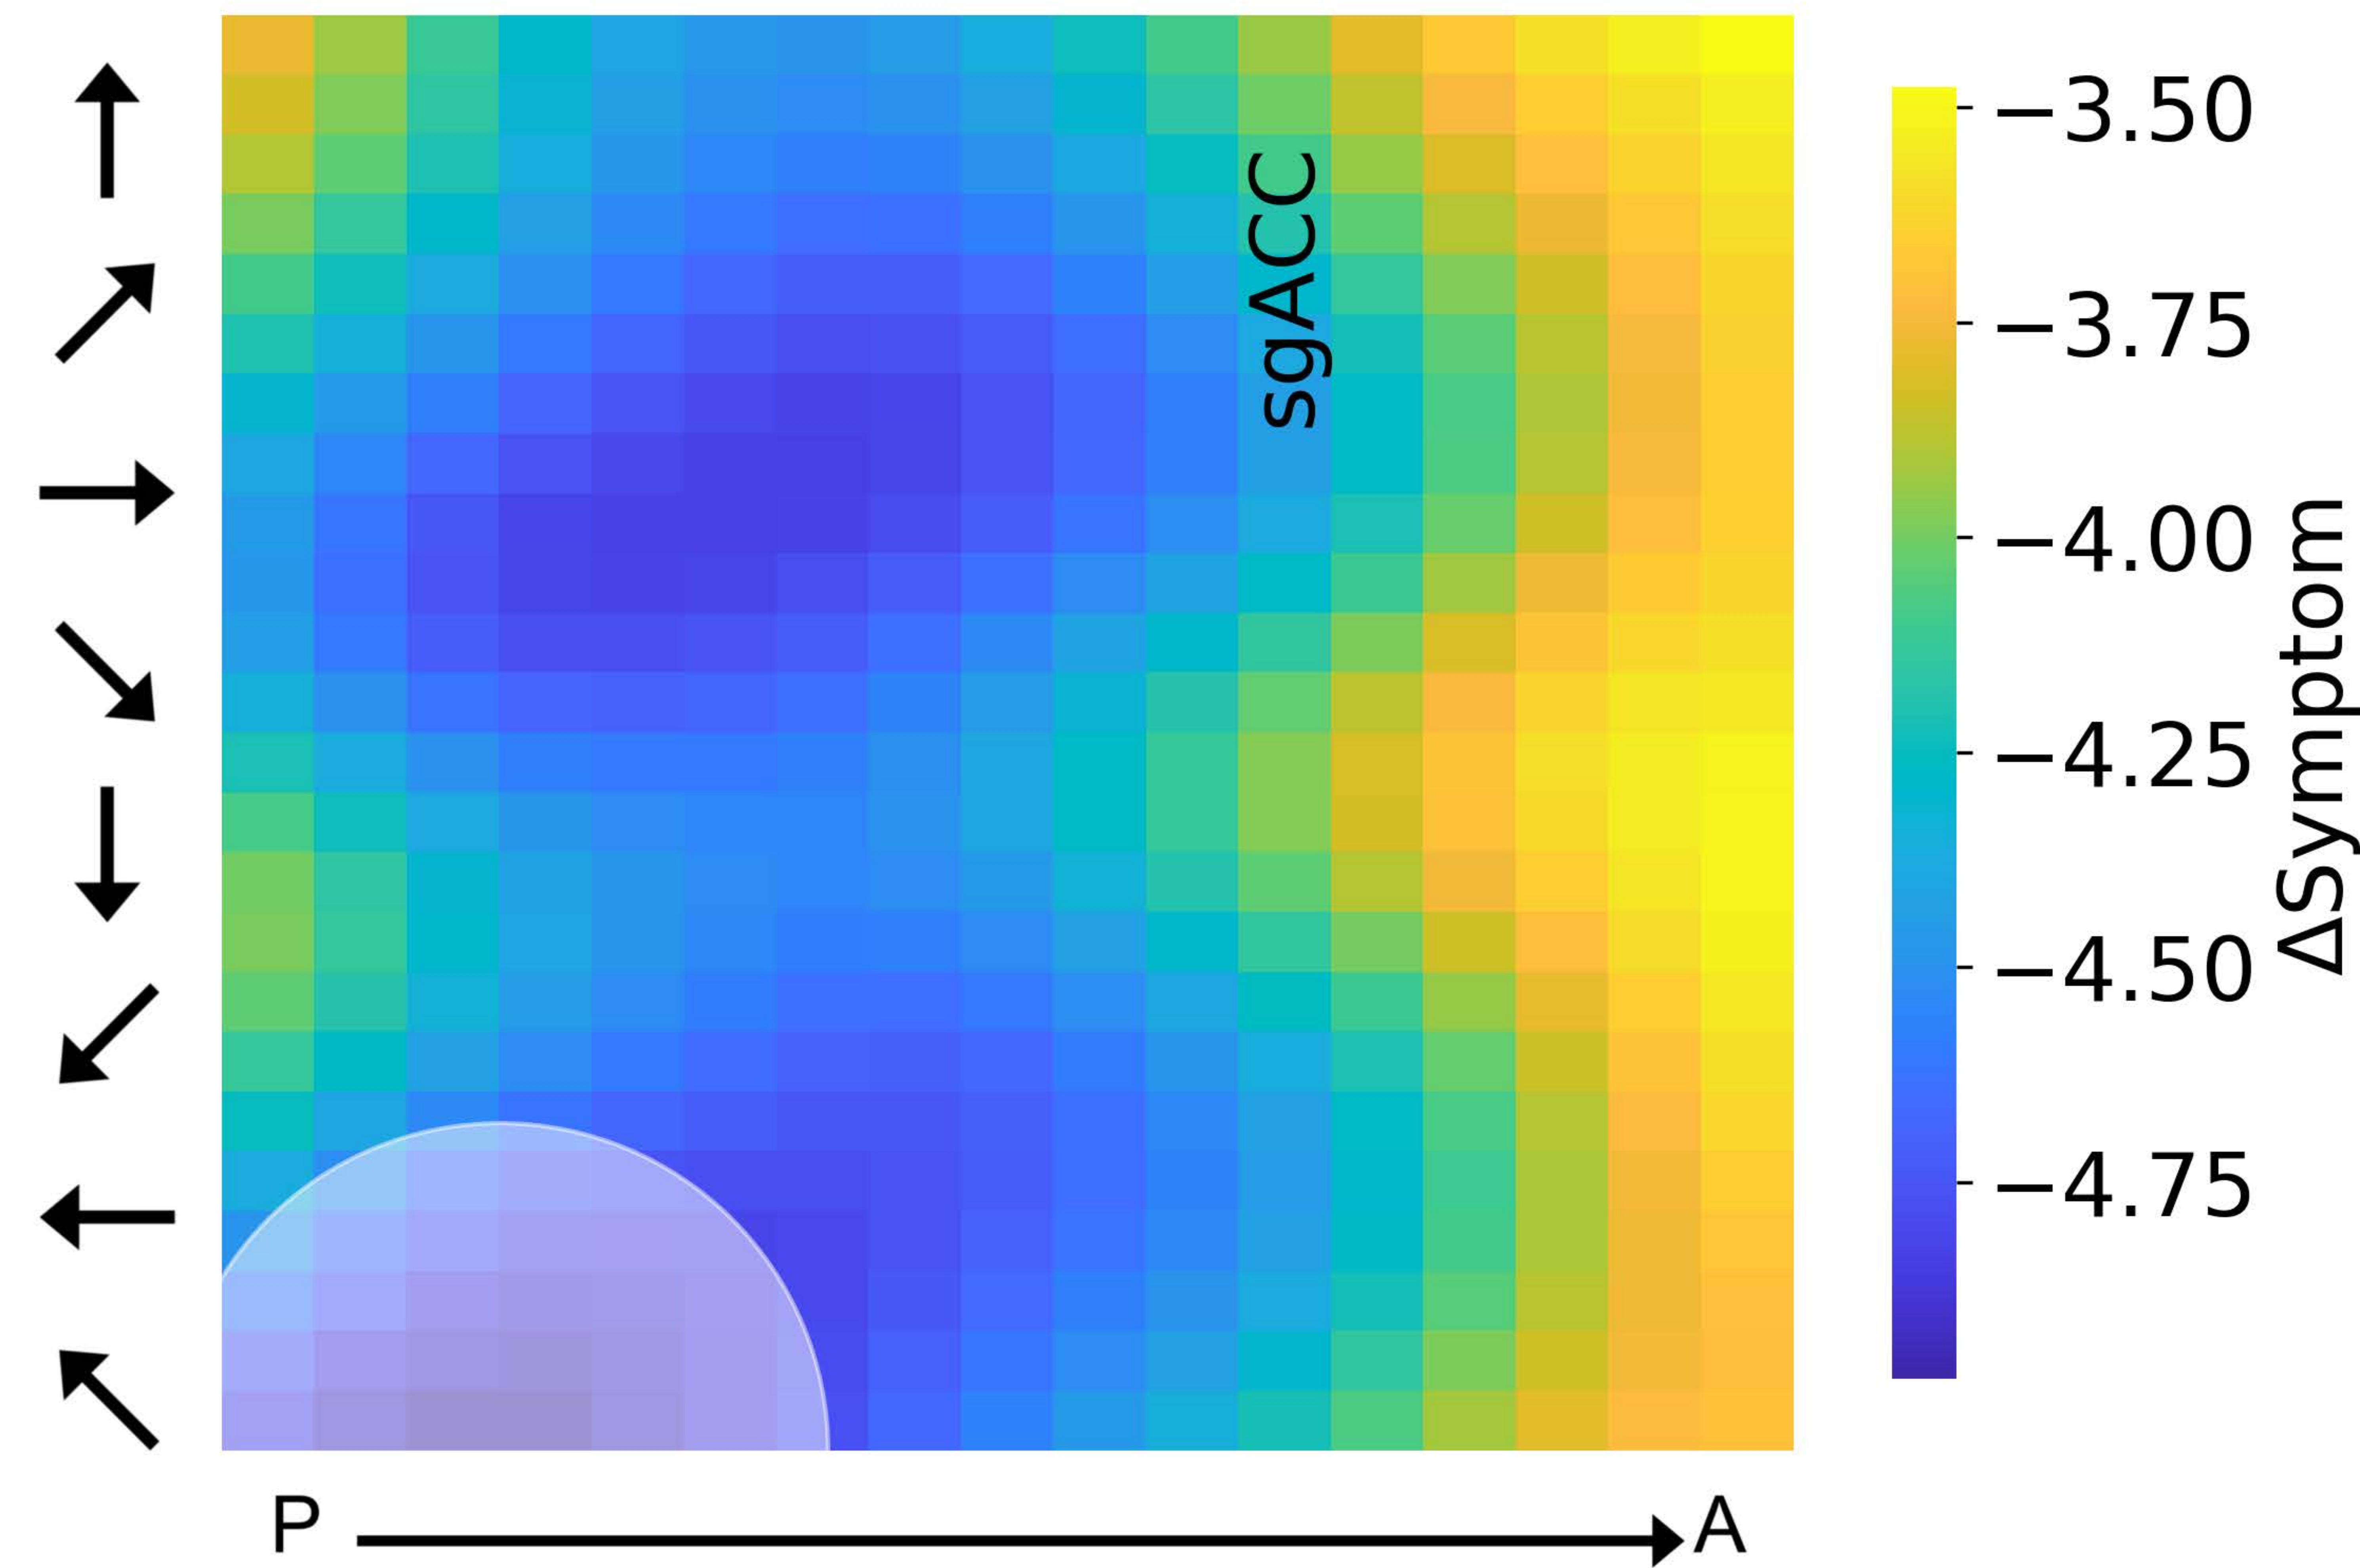



# NDARYM648GK3\_hamd\_right\_dlpfc

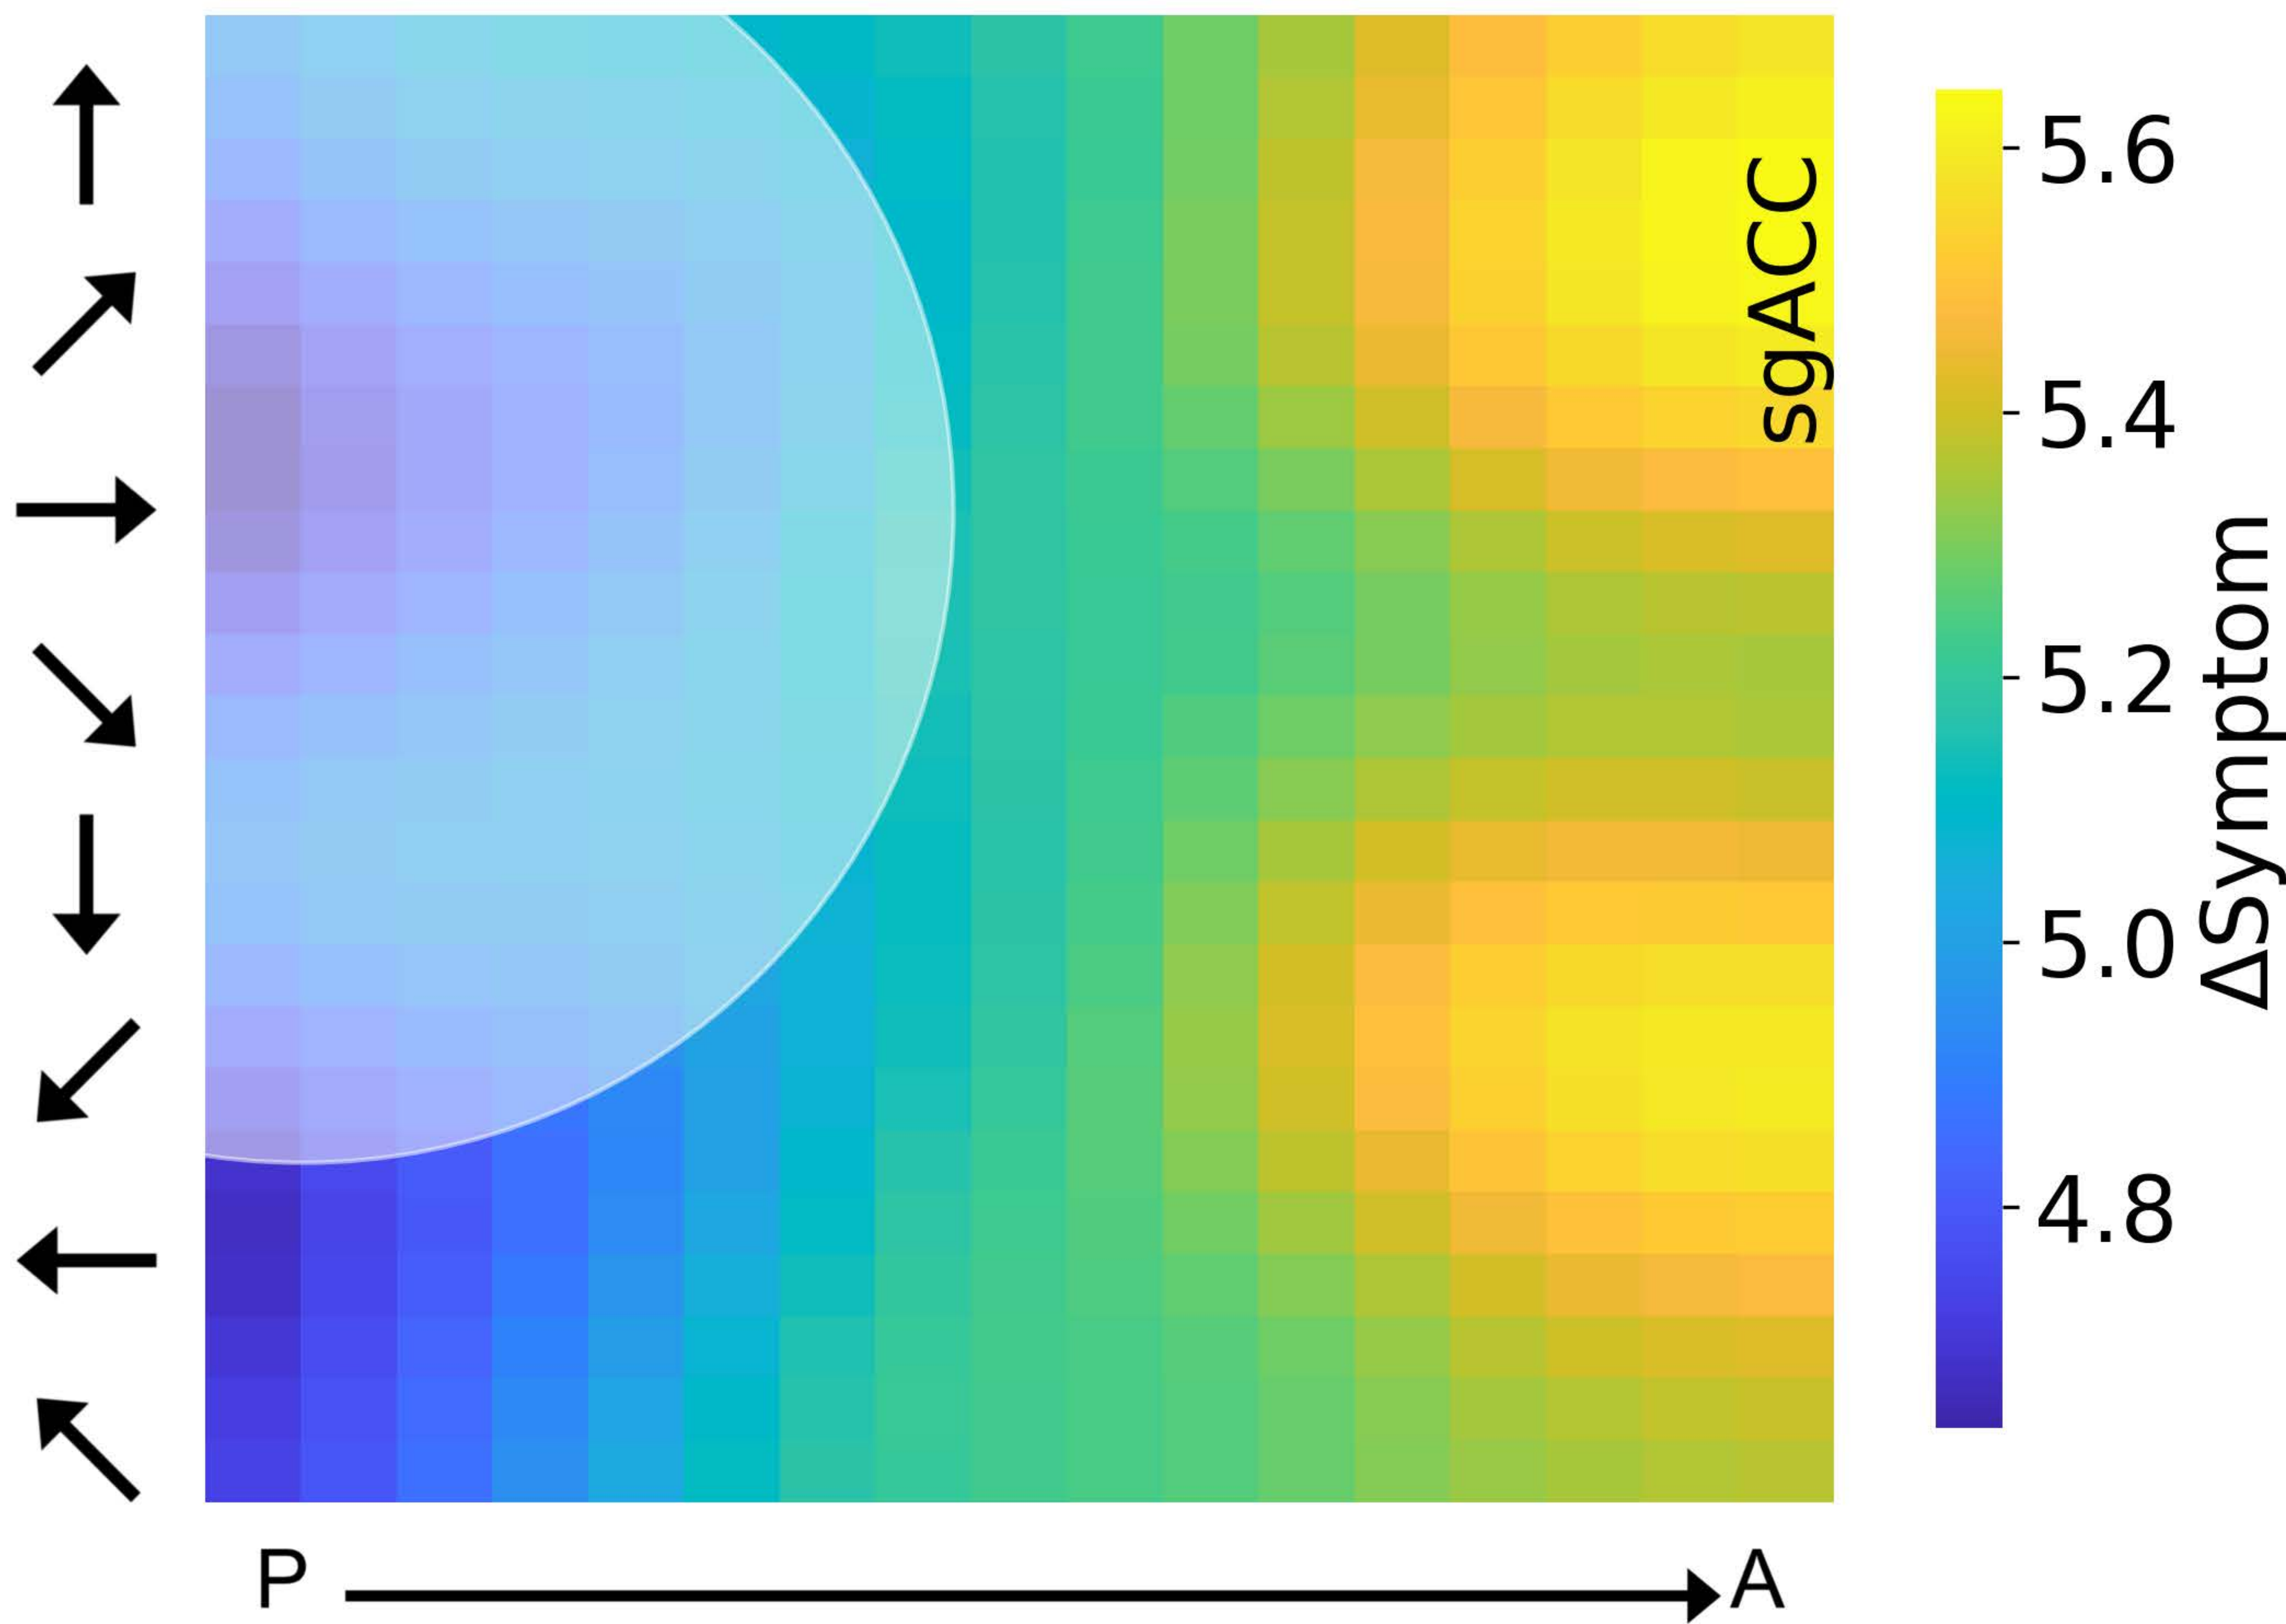



# NDARZH200GZU\_hamd\_right\_dlpfc

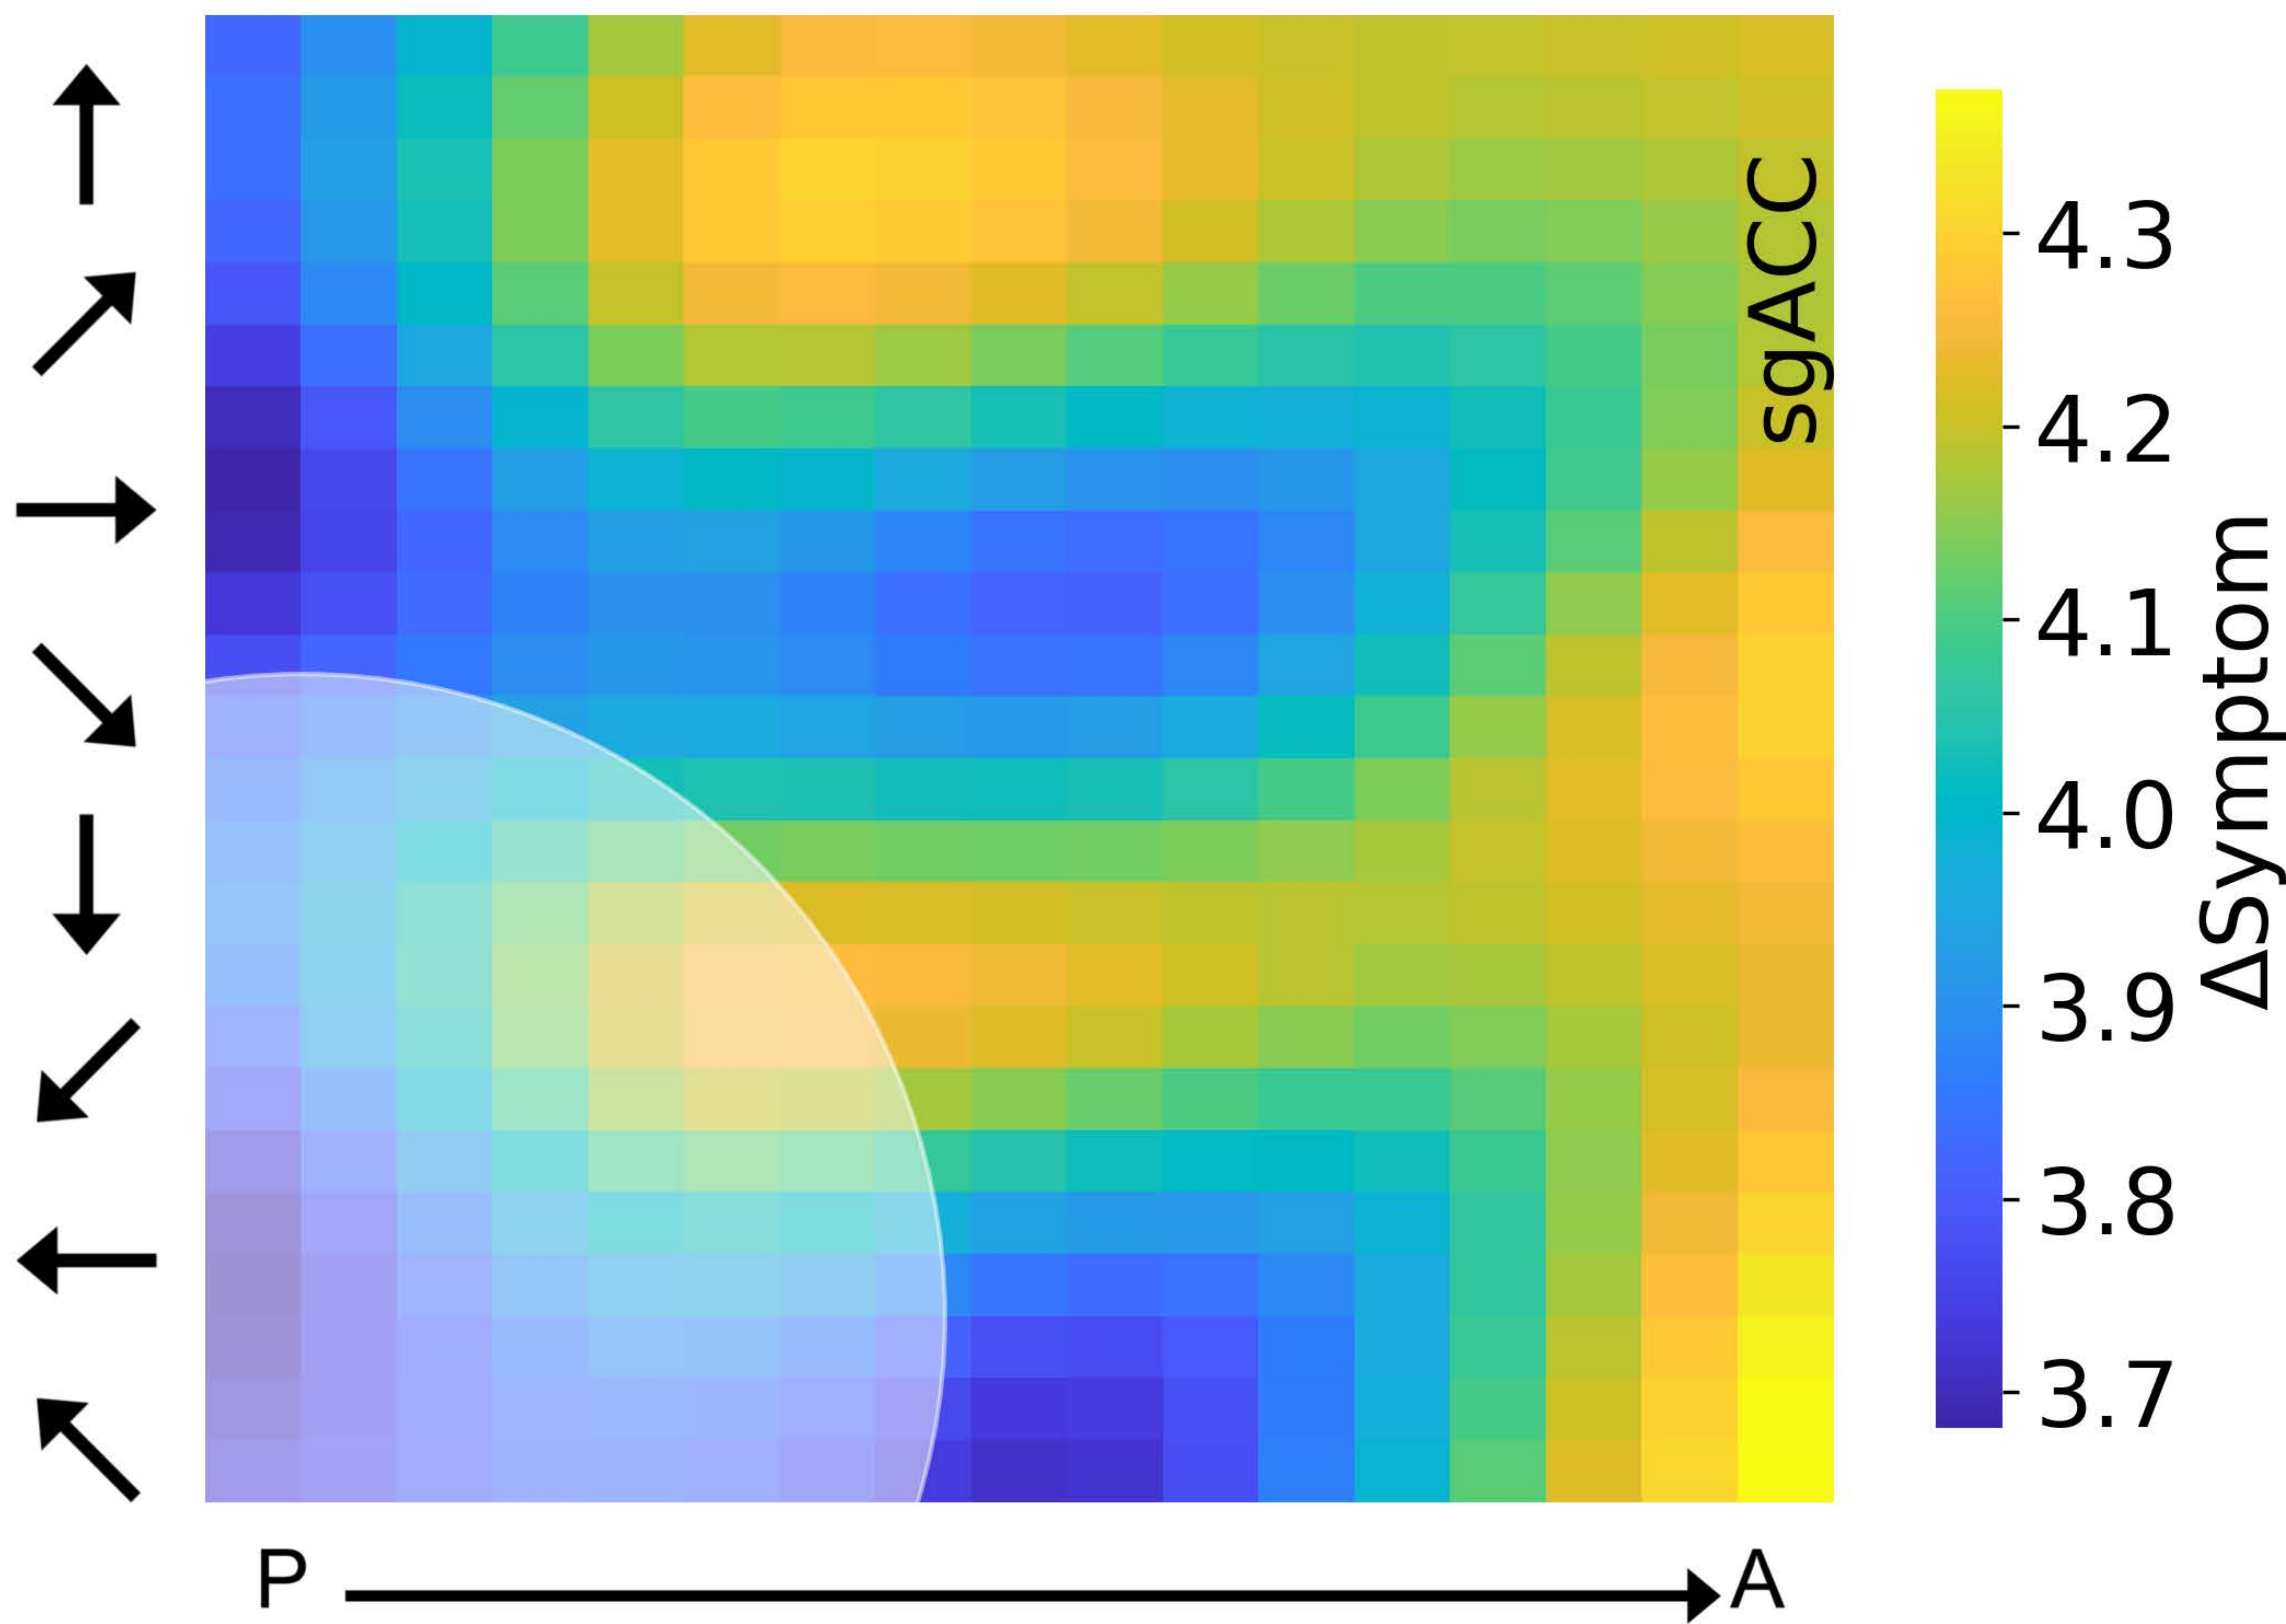



Healthy  
control  
subjects'  
heatmaps



# NDARAC286ZE7\_madrs\_left\_dlpfc

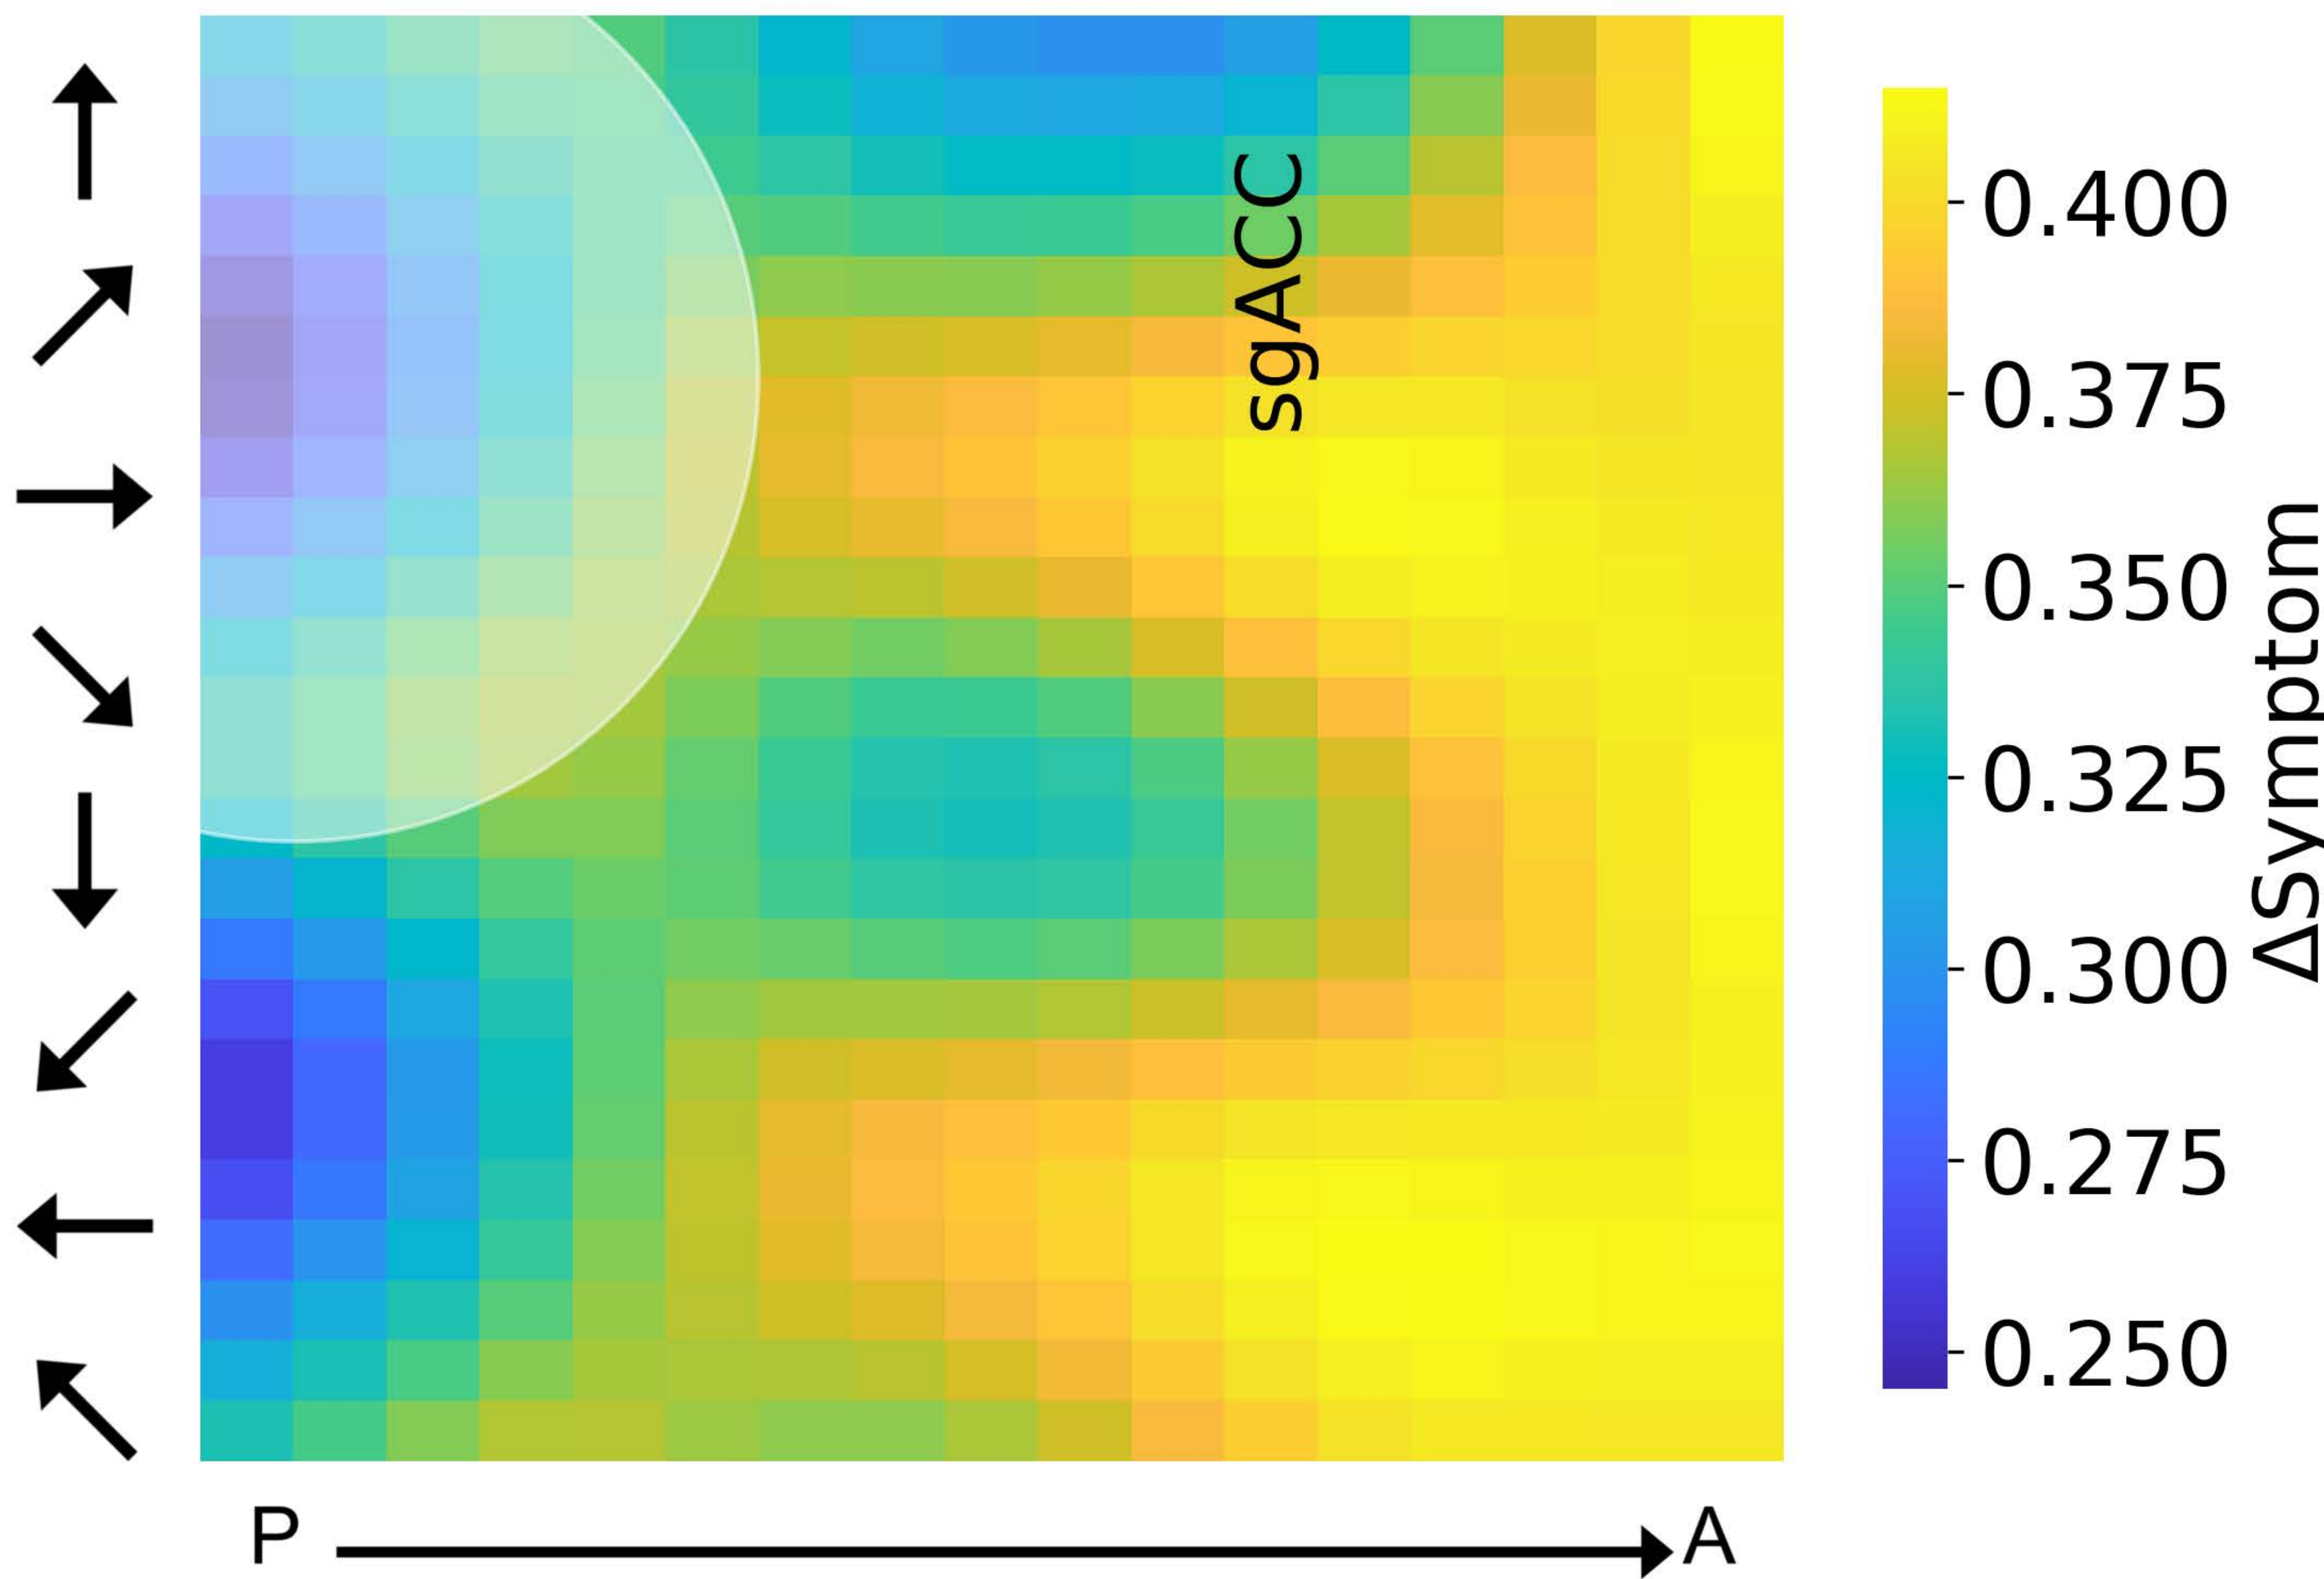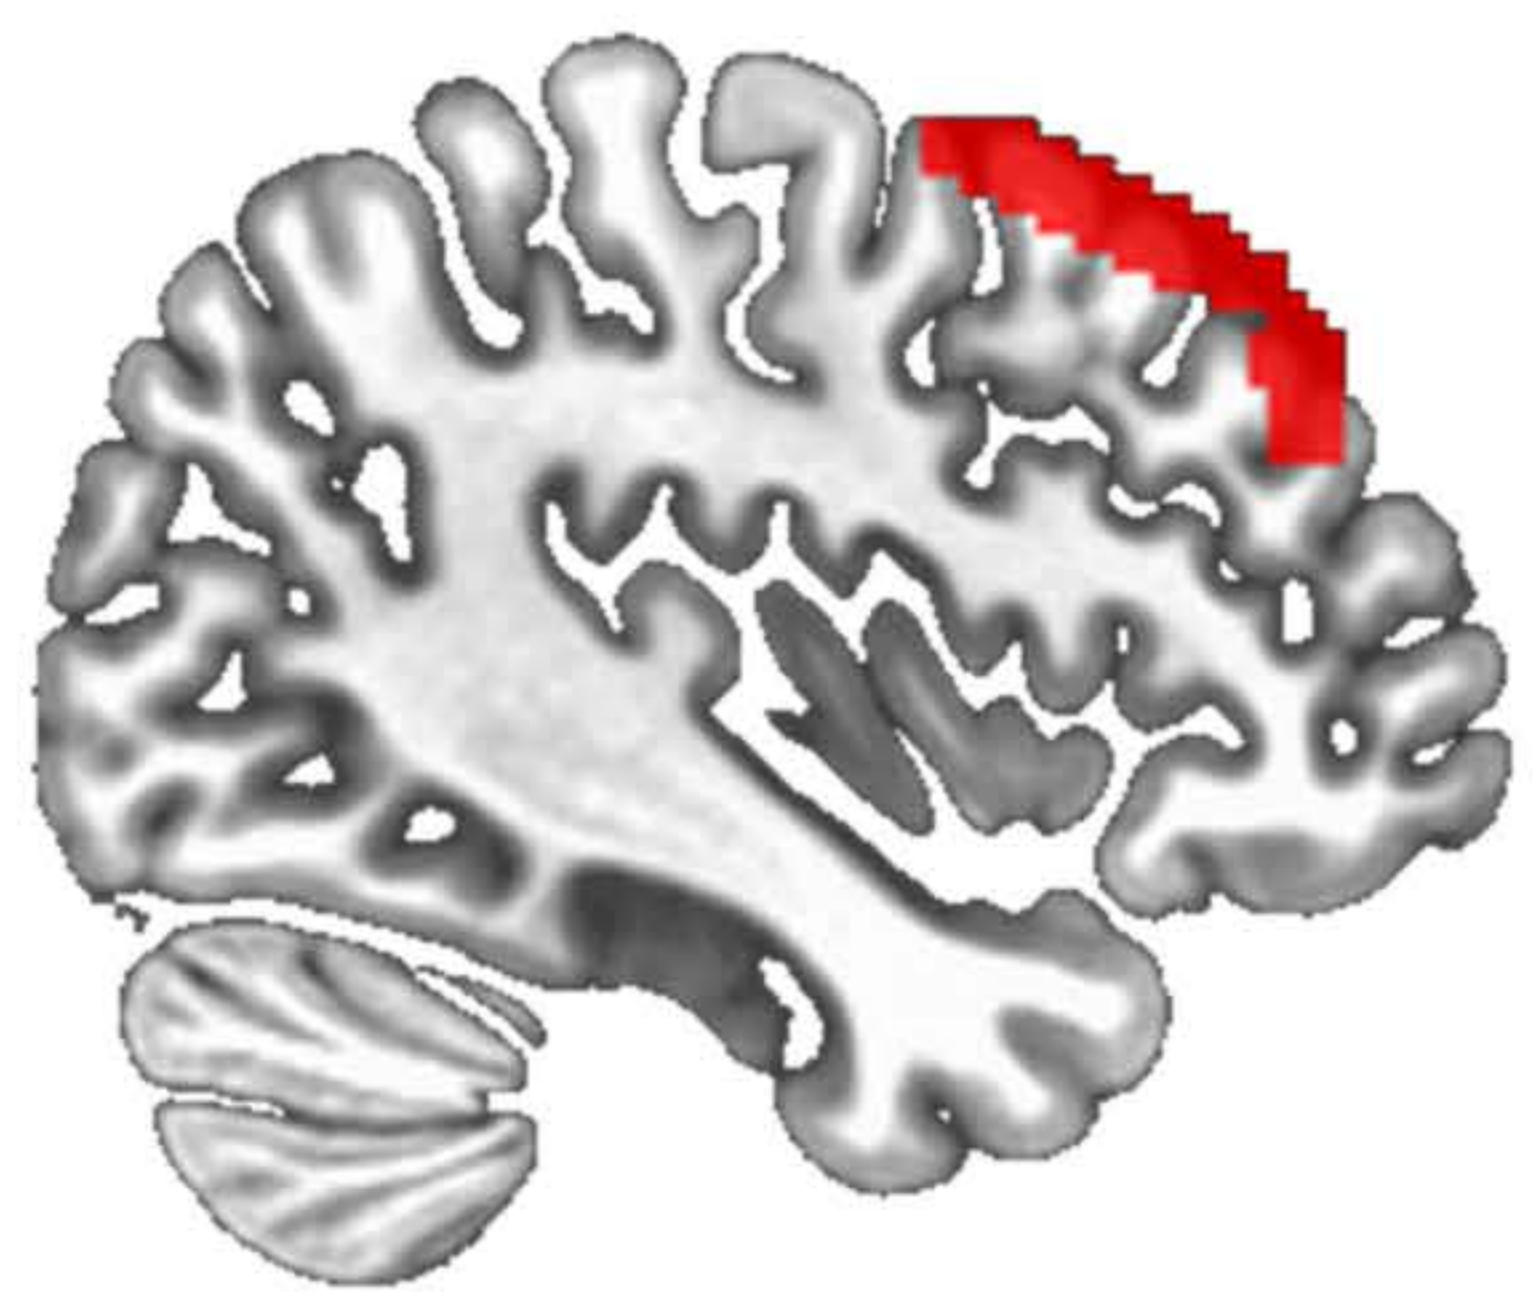



# NDARAC789HEZ\_madrs\_left\_dlpfc

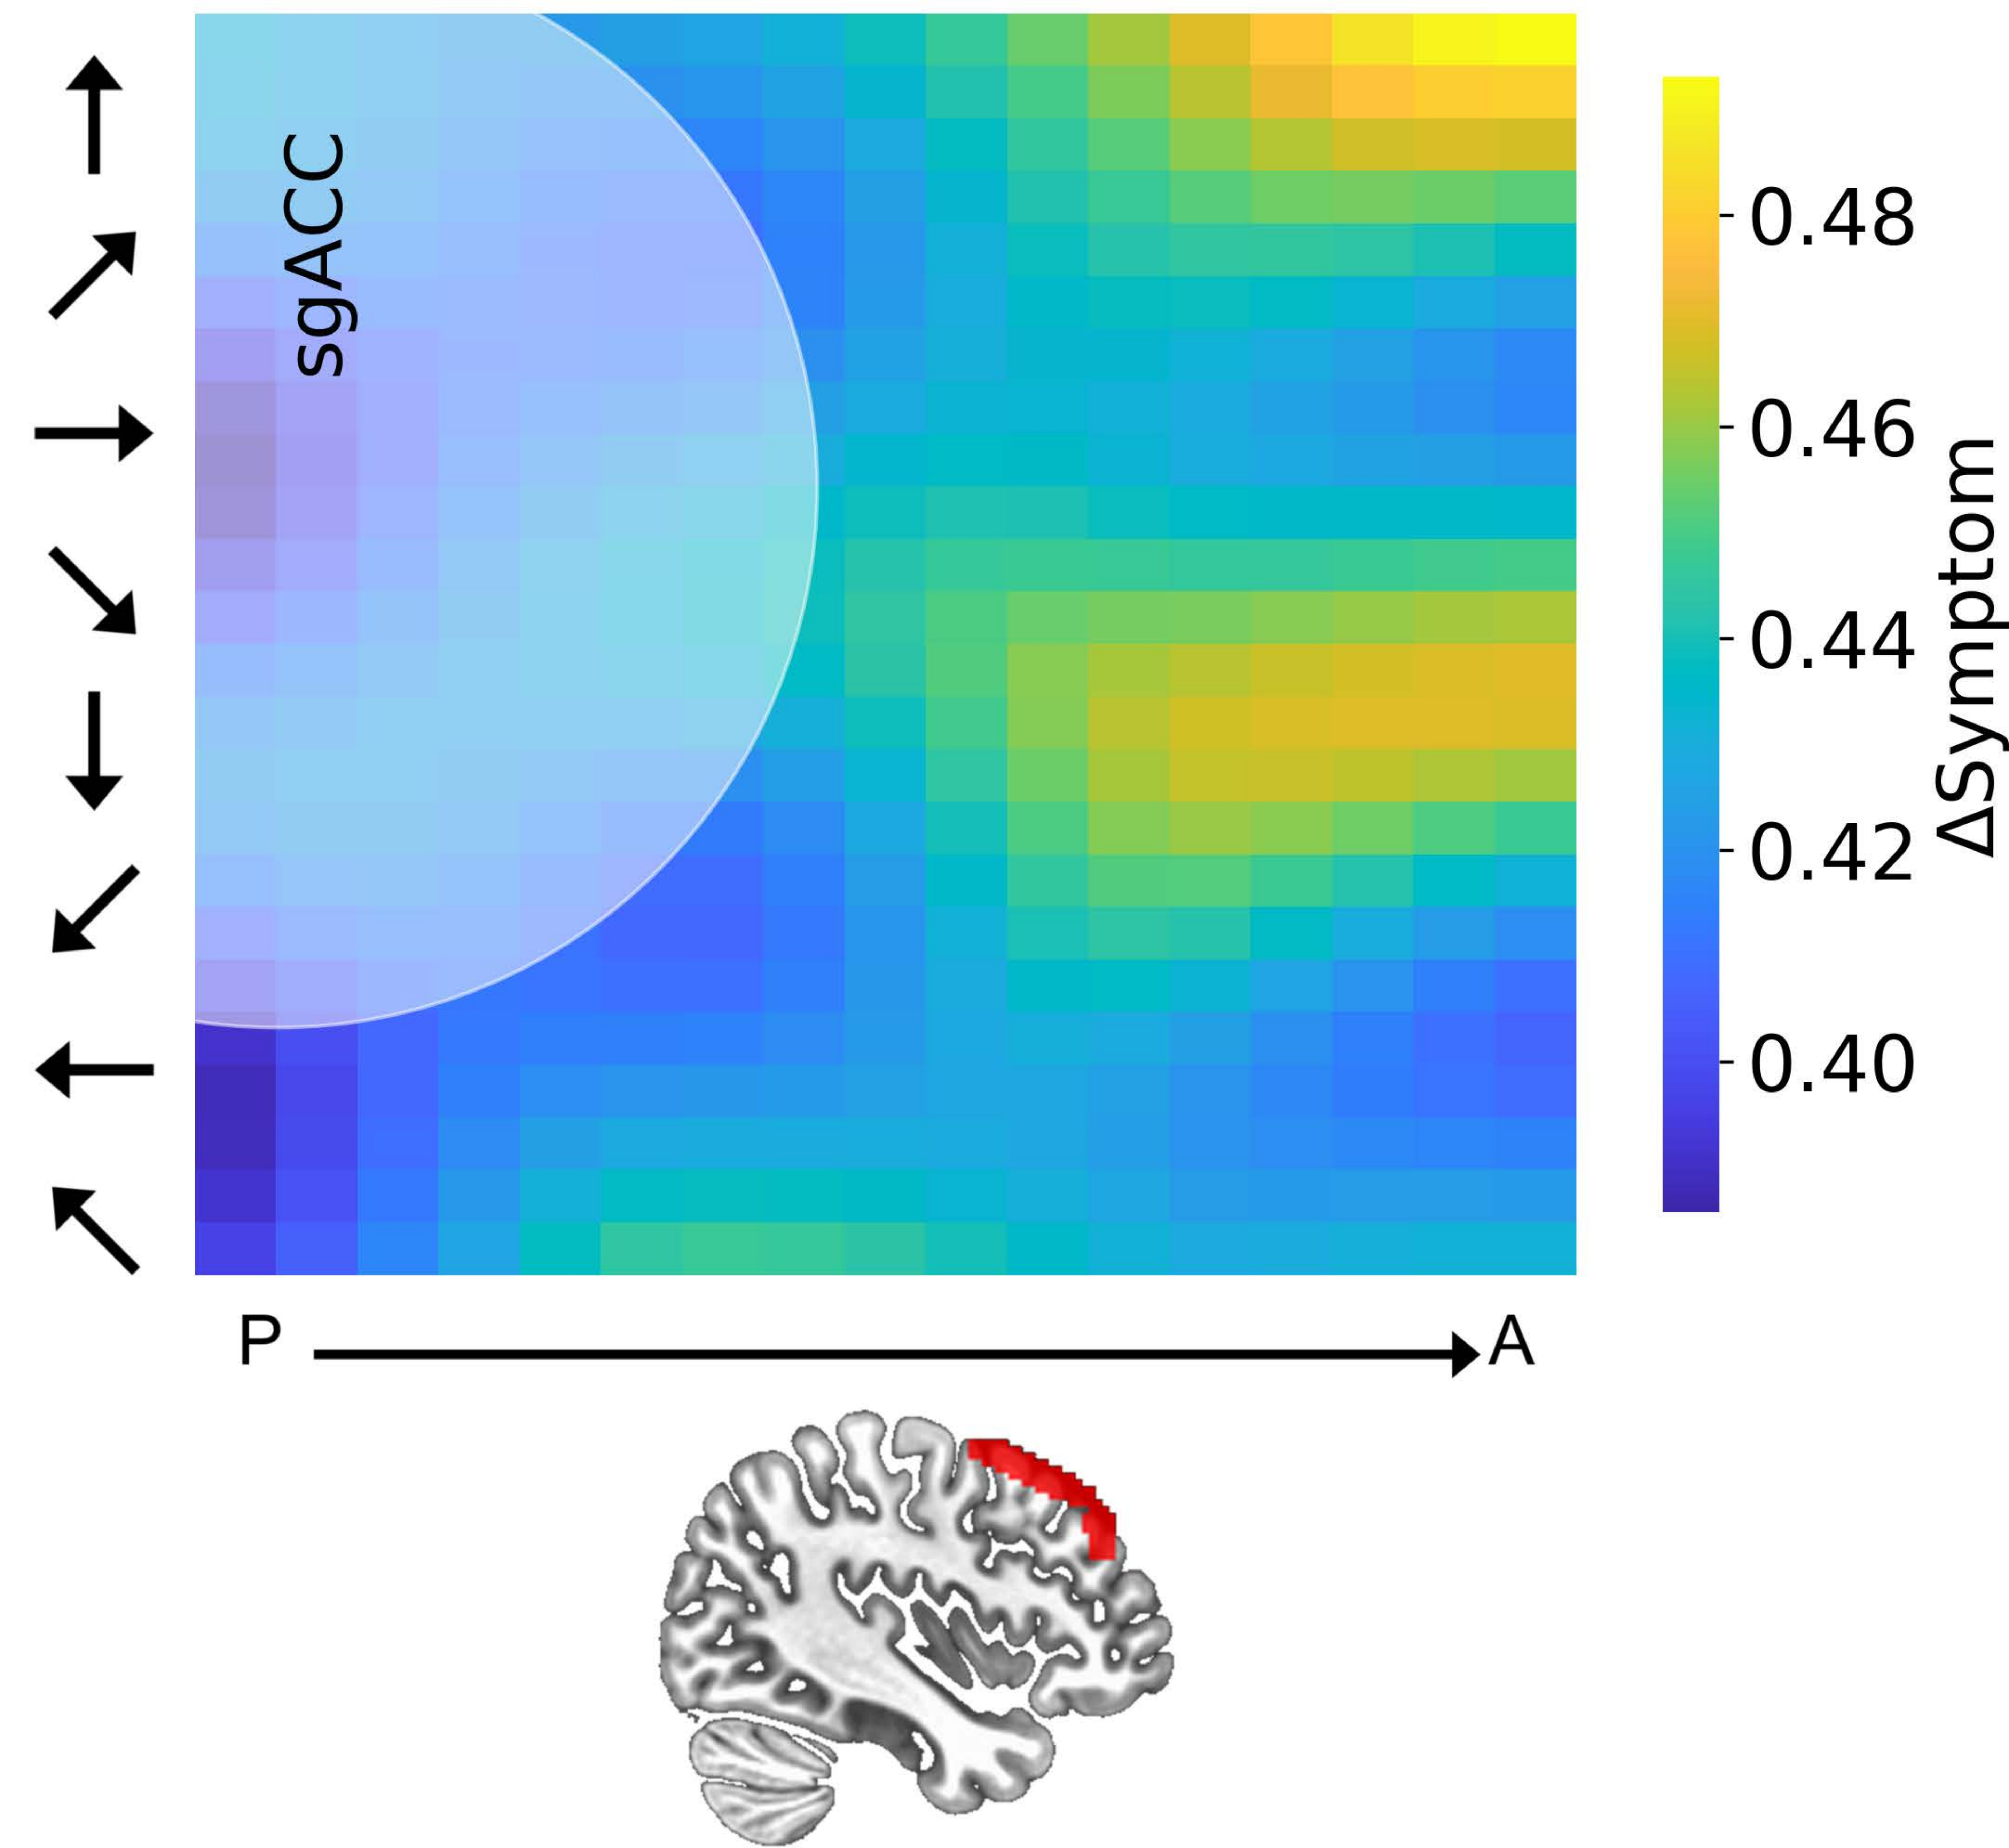



# NDARBD224PBF\_madrs\_left\_dlpfc

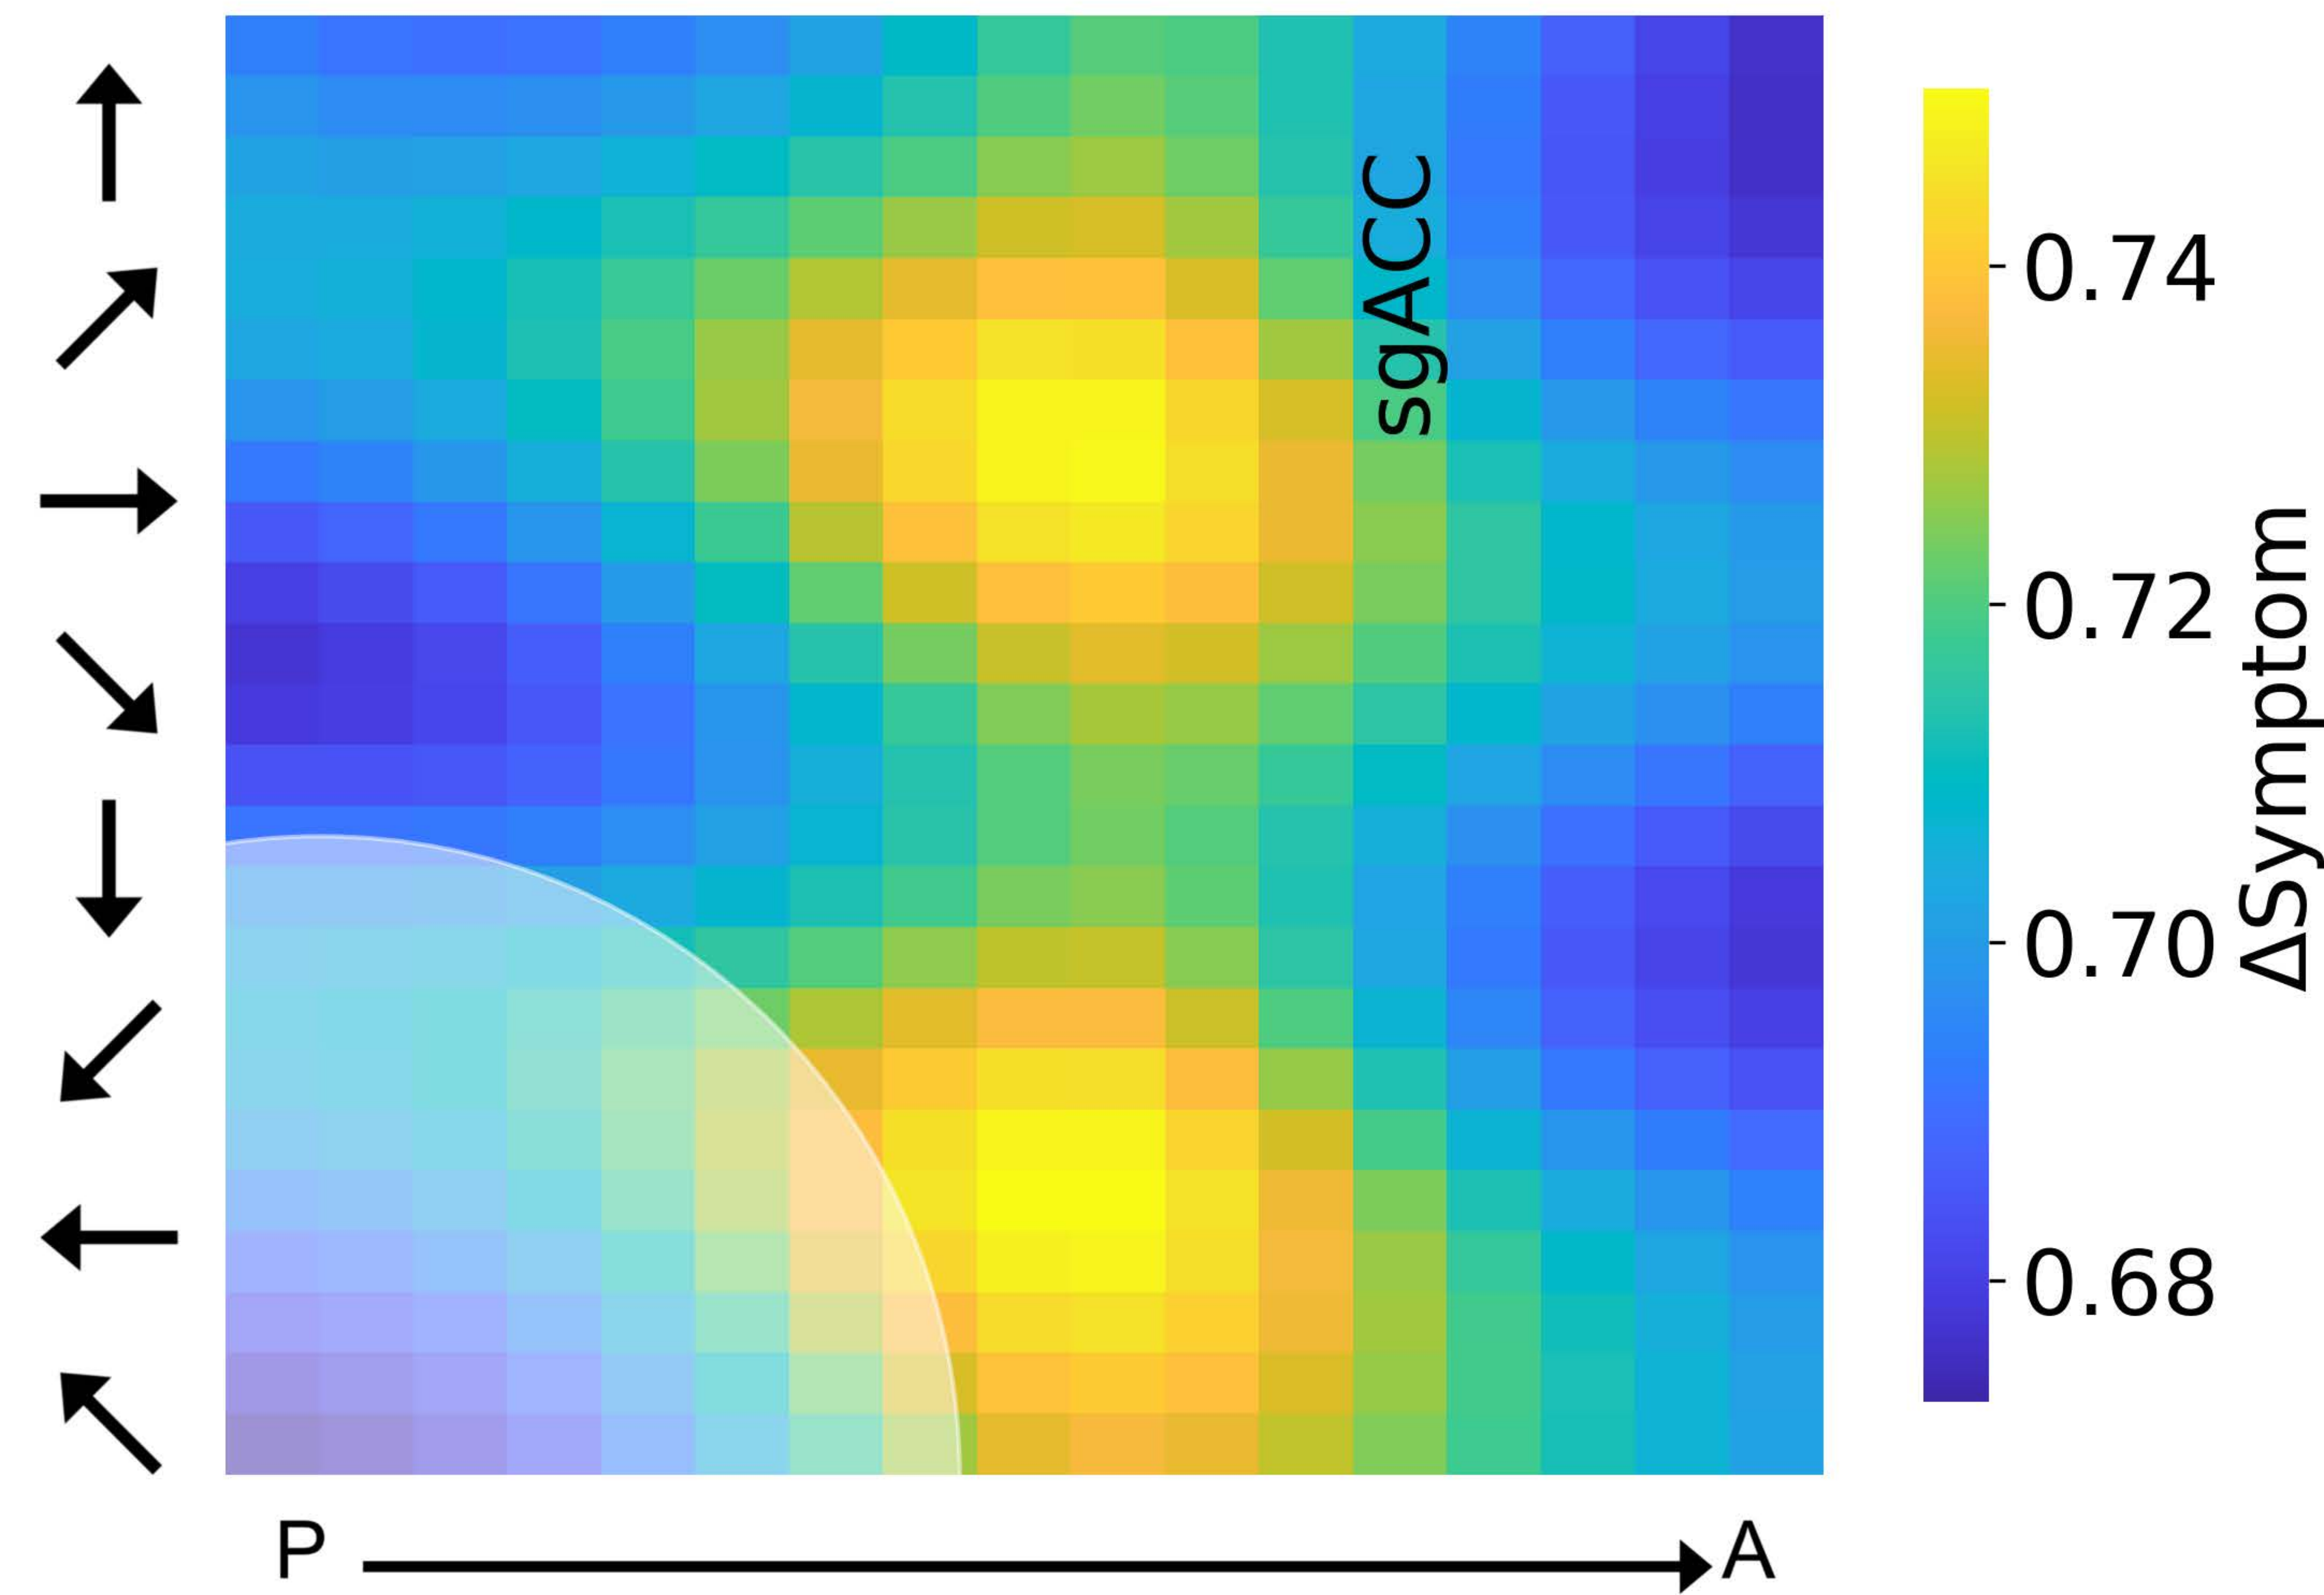



# NDARBF292NPE\_madrs\_left\_dlpfc

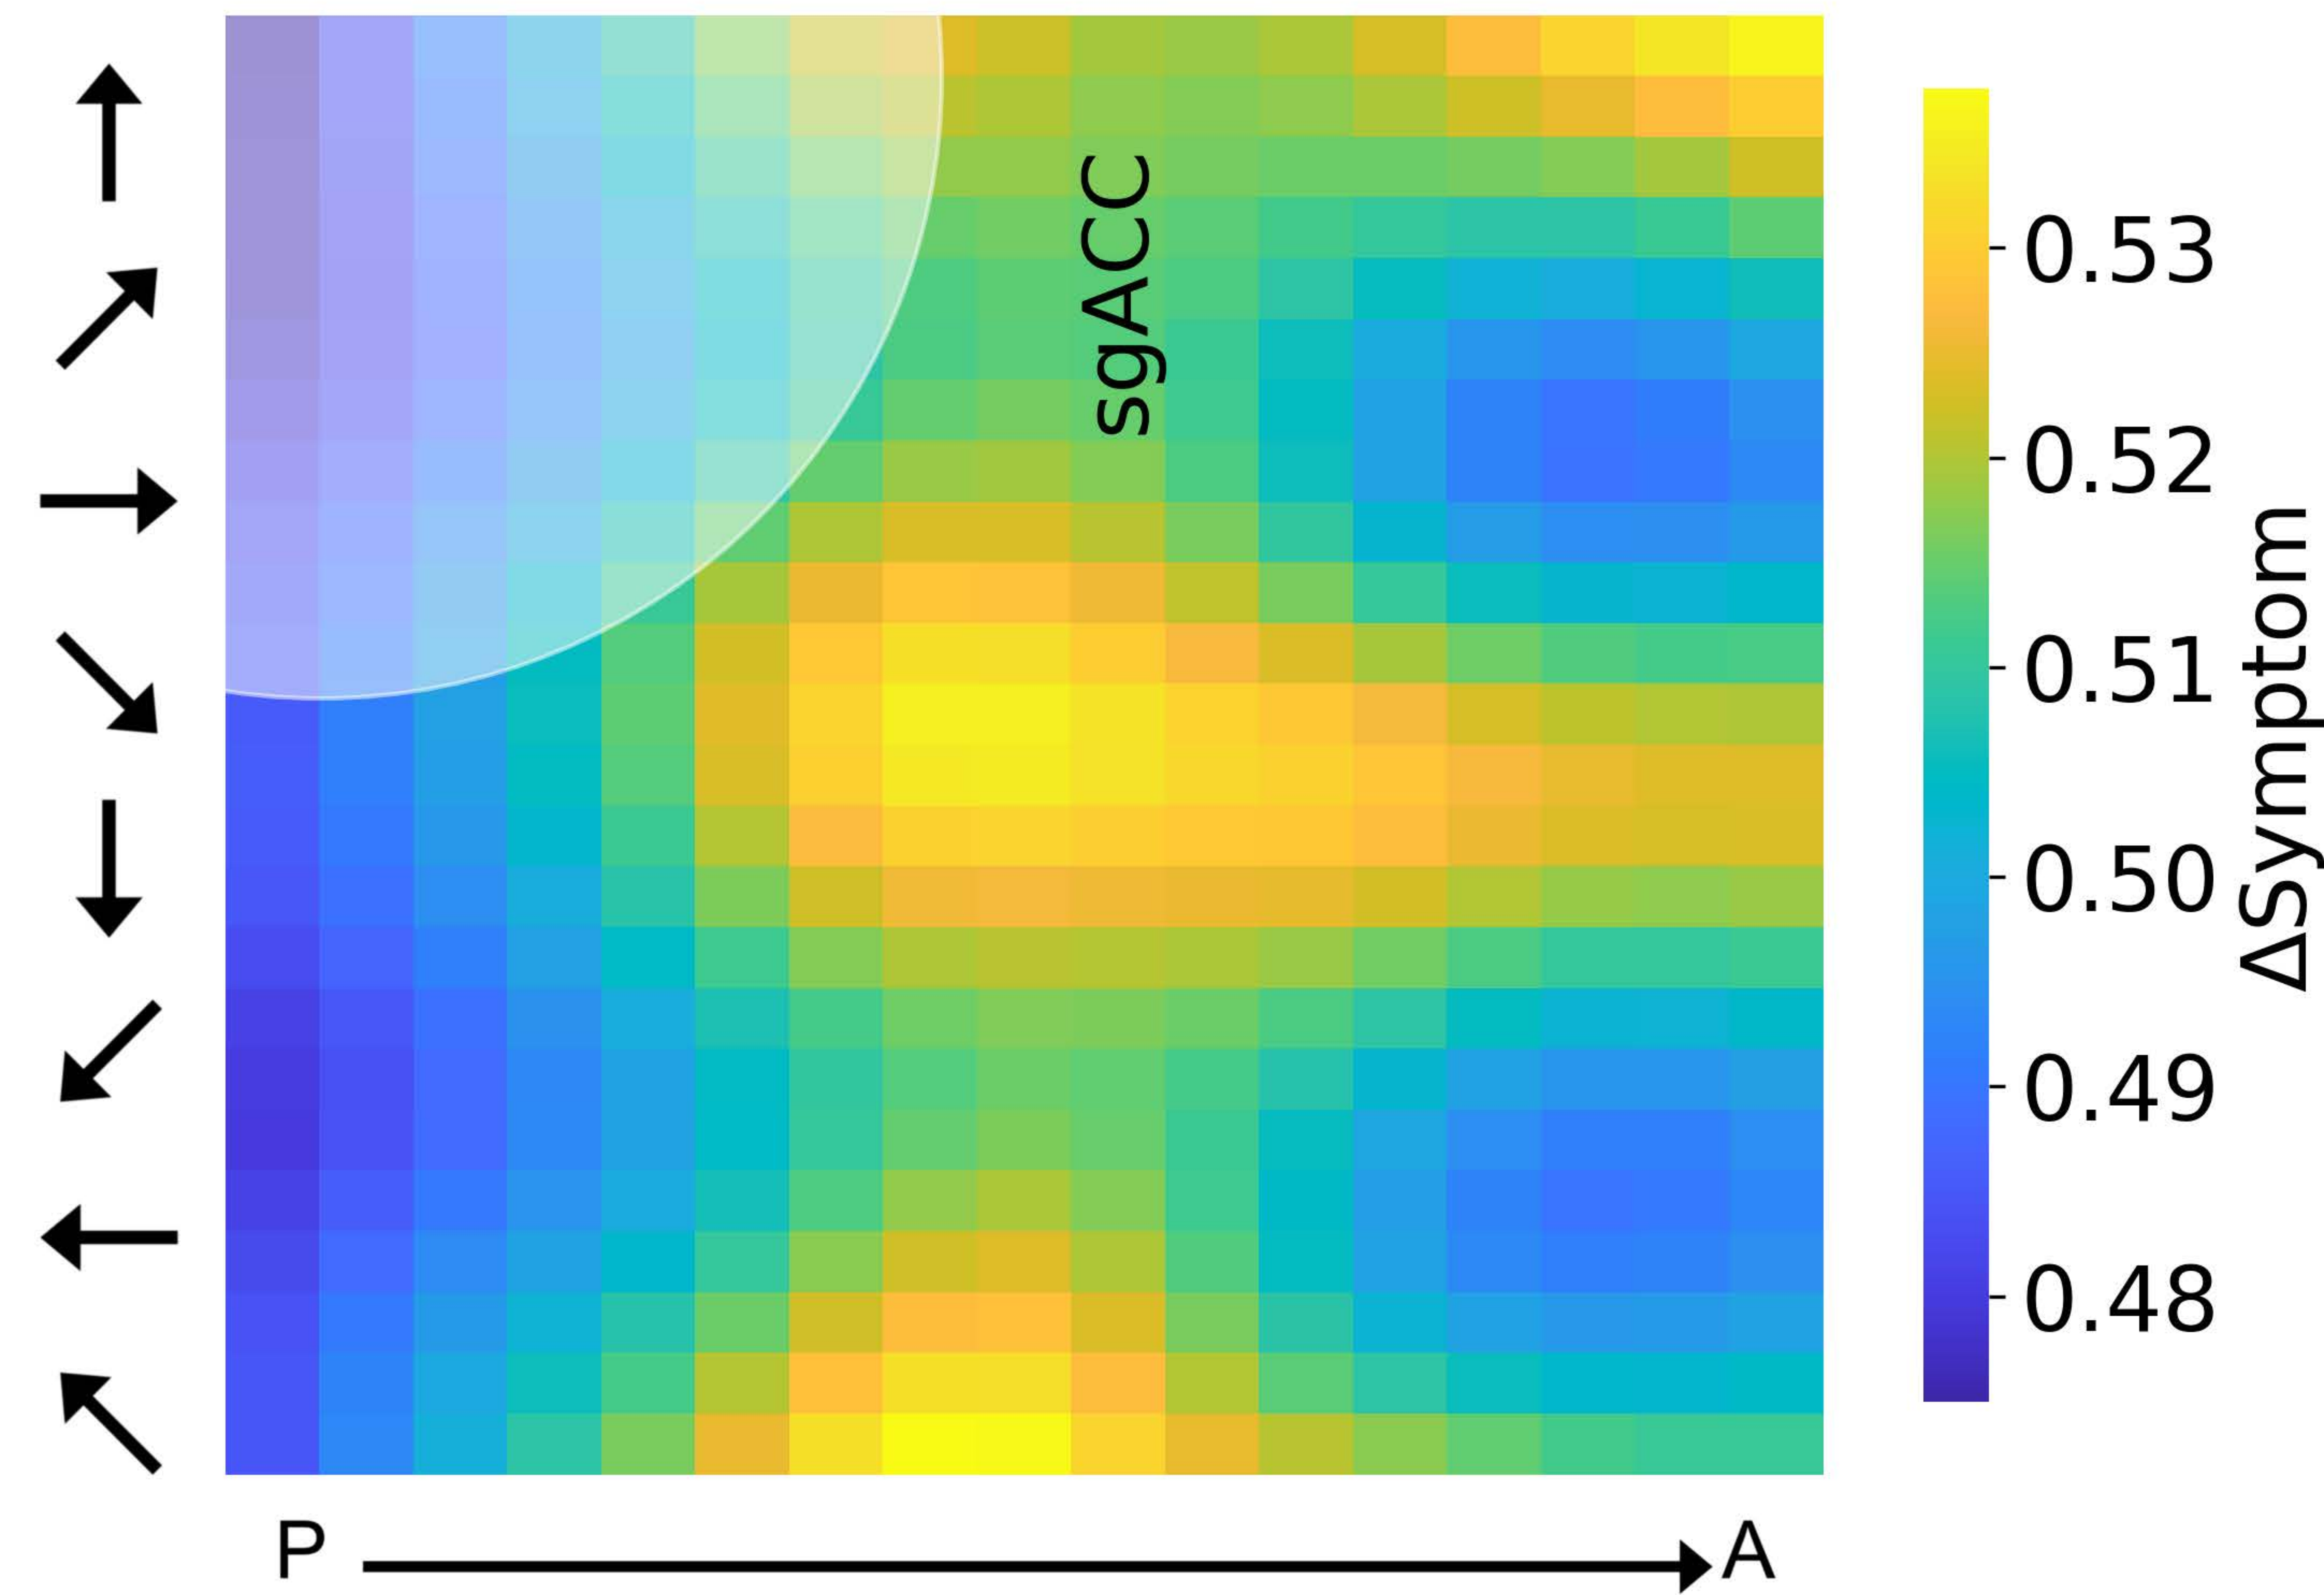



# NDARCG535CPC\_madrs\_left\_dlpfc

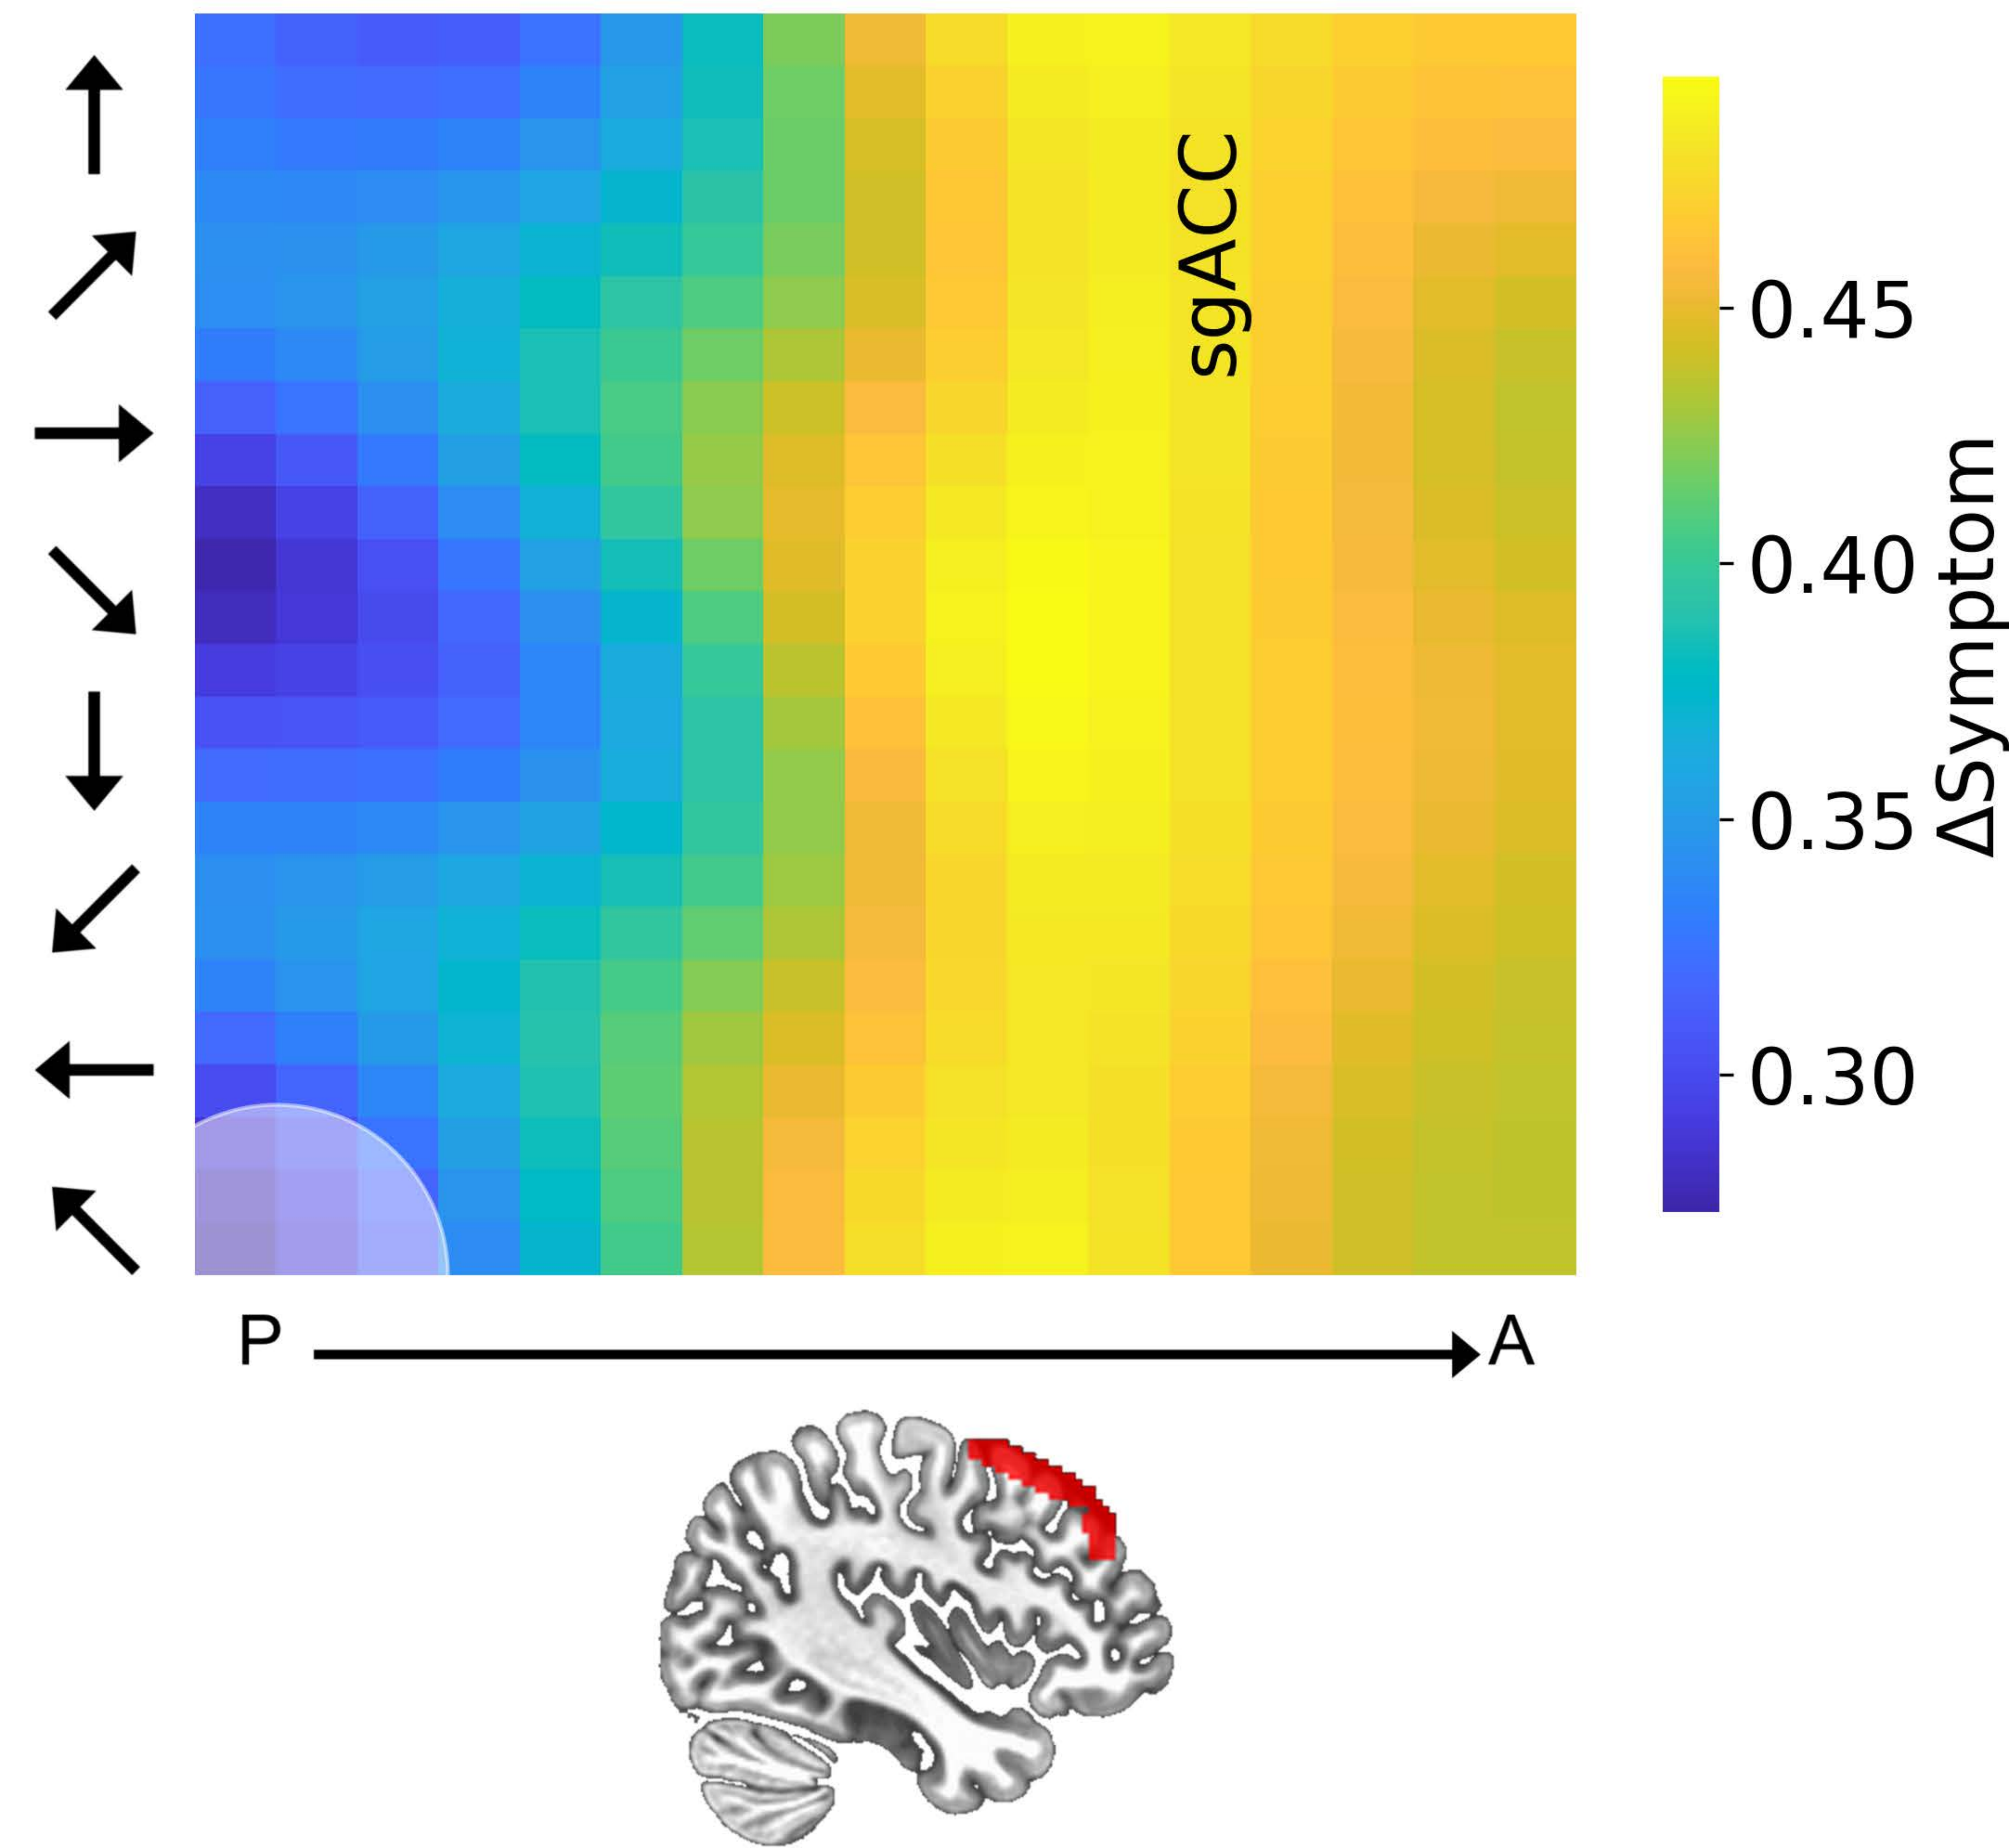



# INDARC406TU1\_madrs\_left\_dlpfc

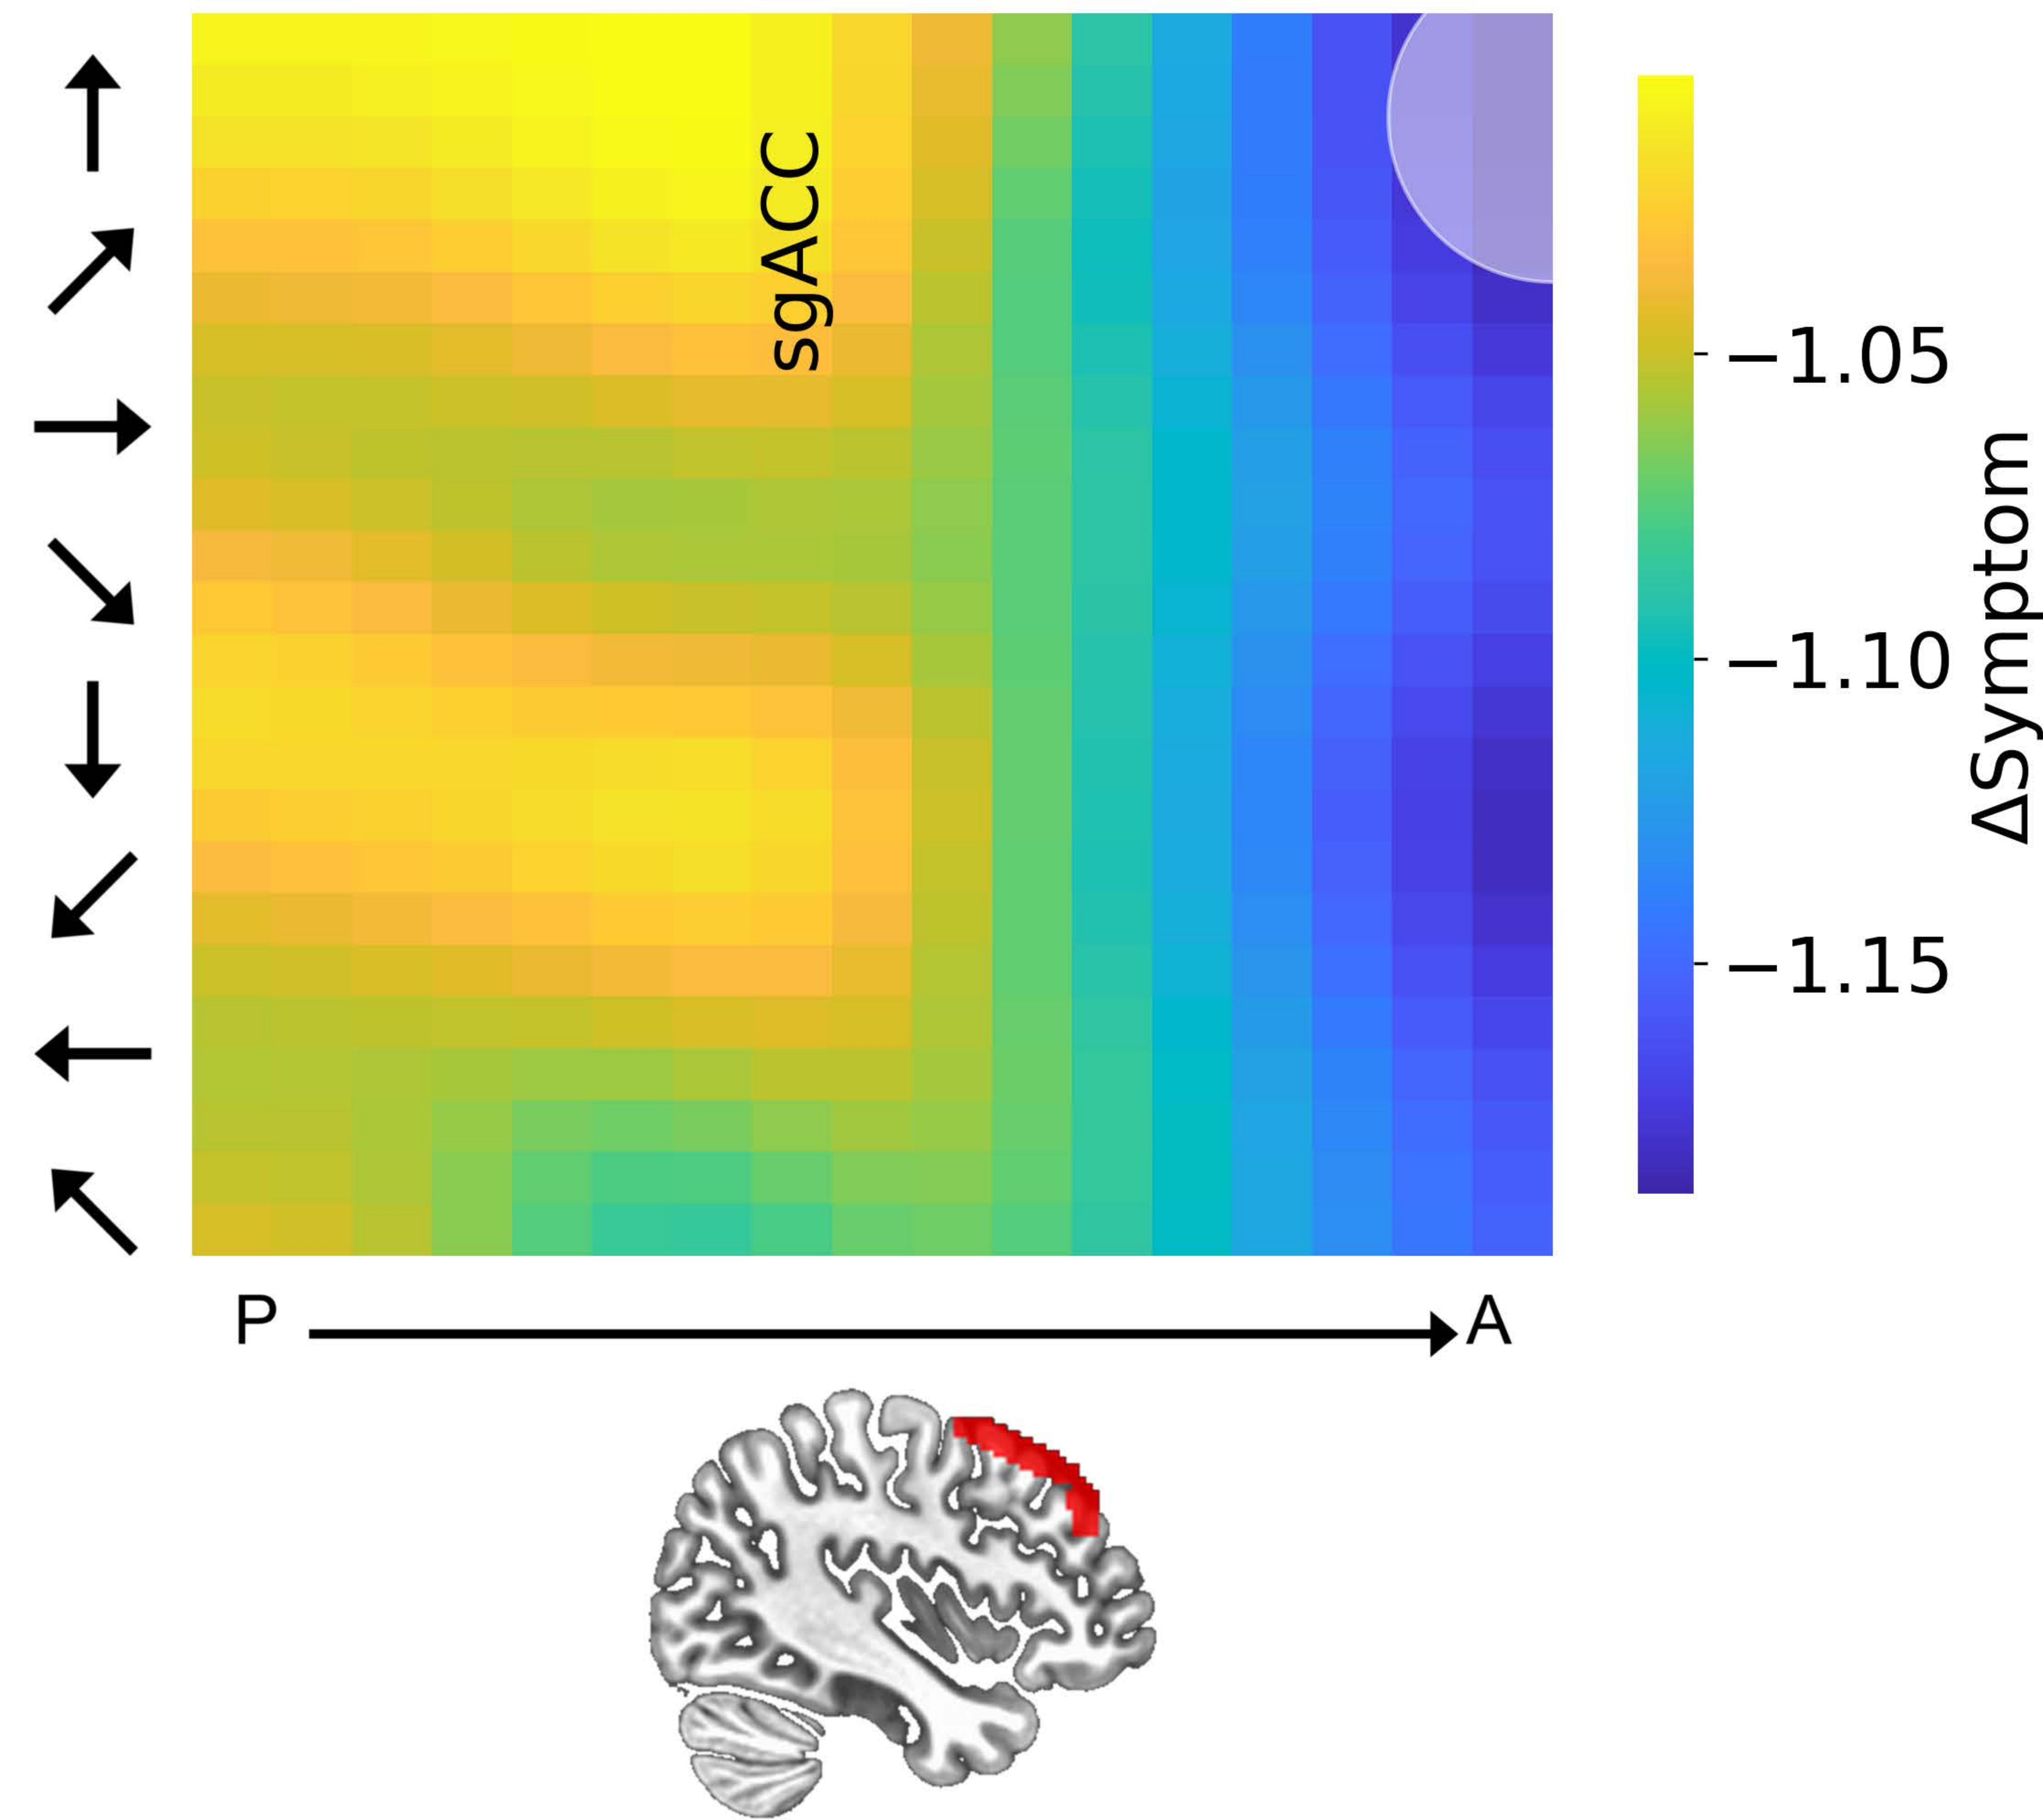



# INDARDY771TXZ\_madrs\_left\_dlpfc

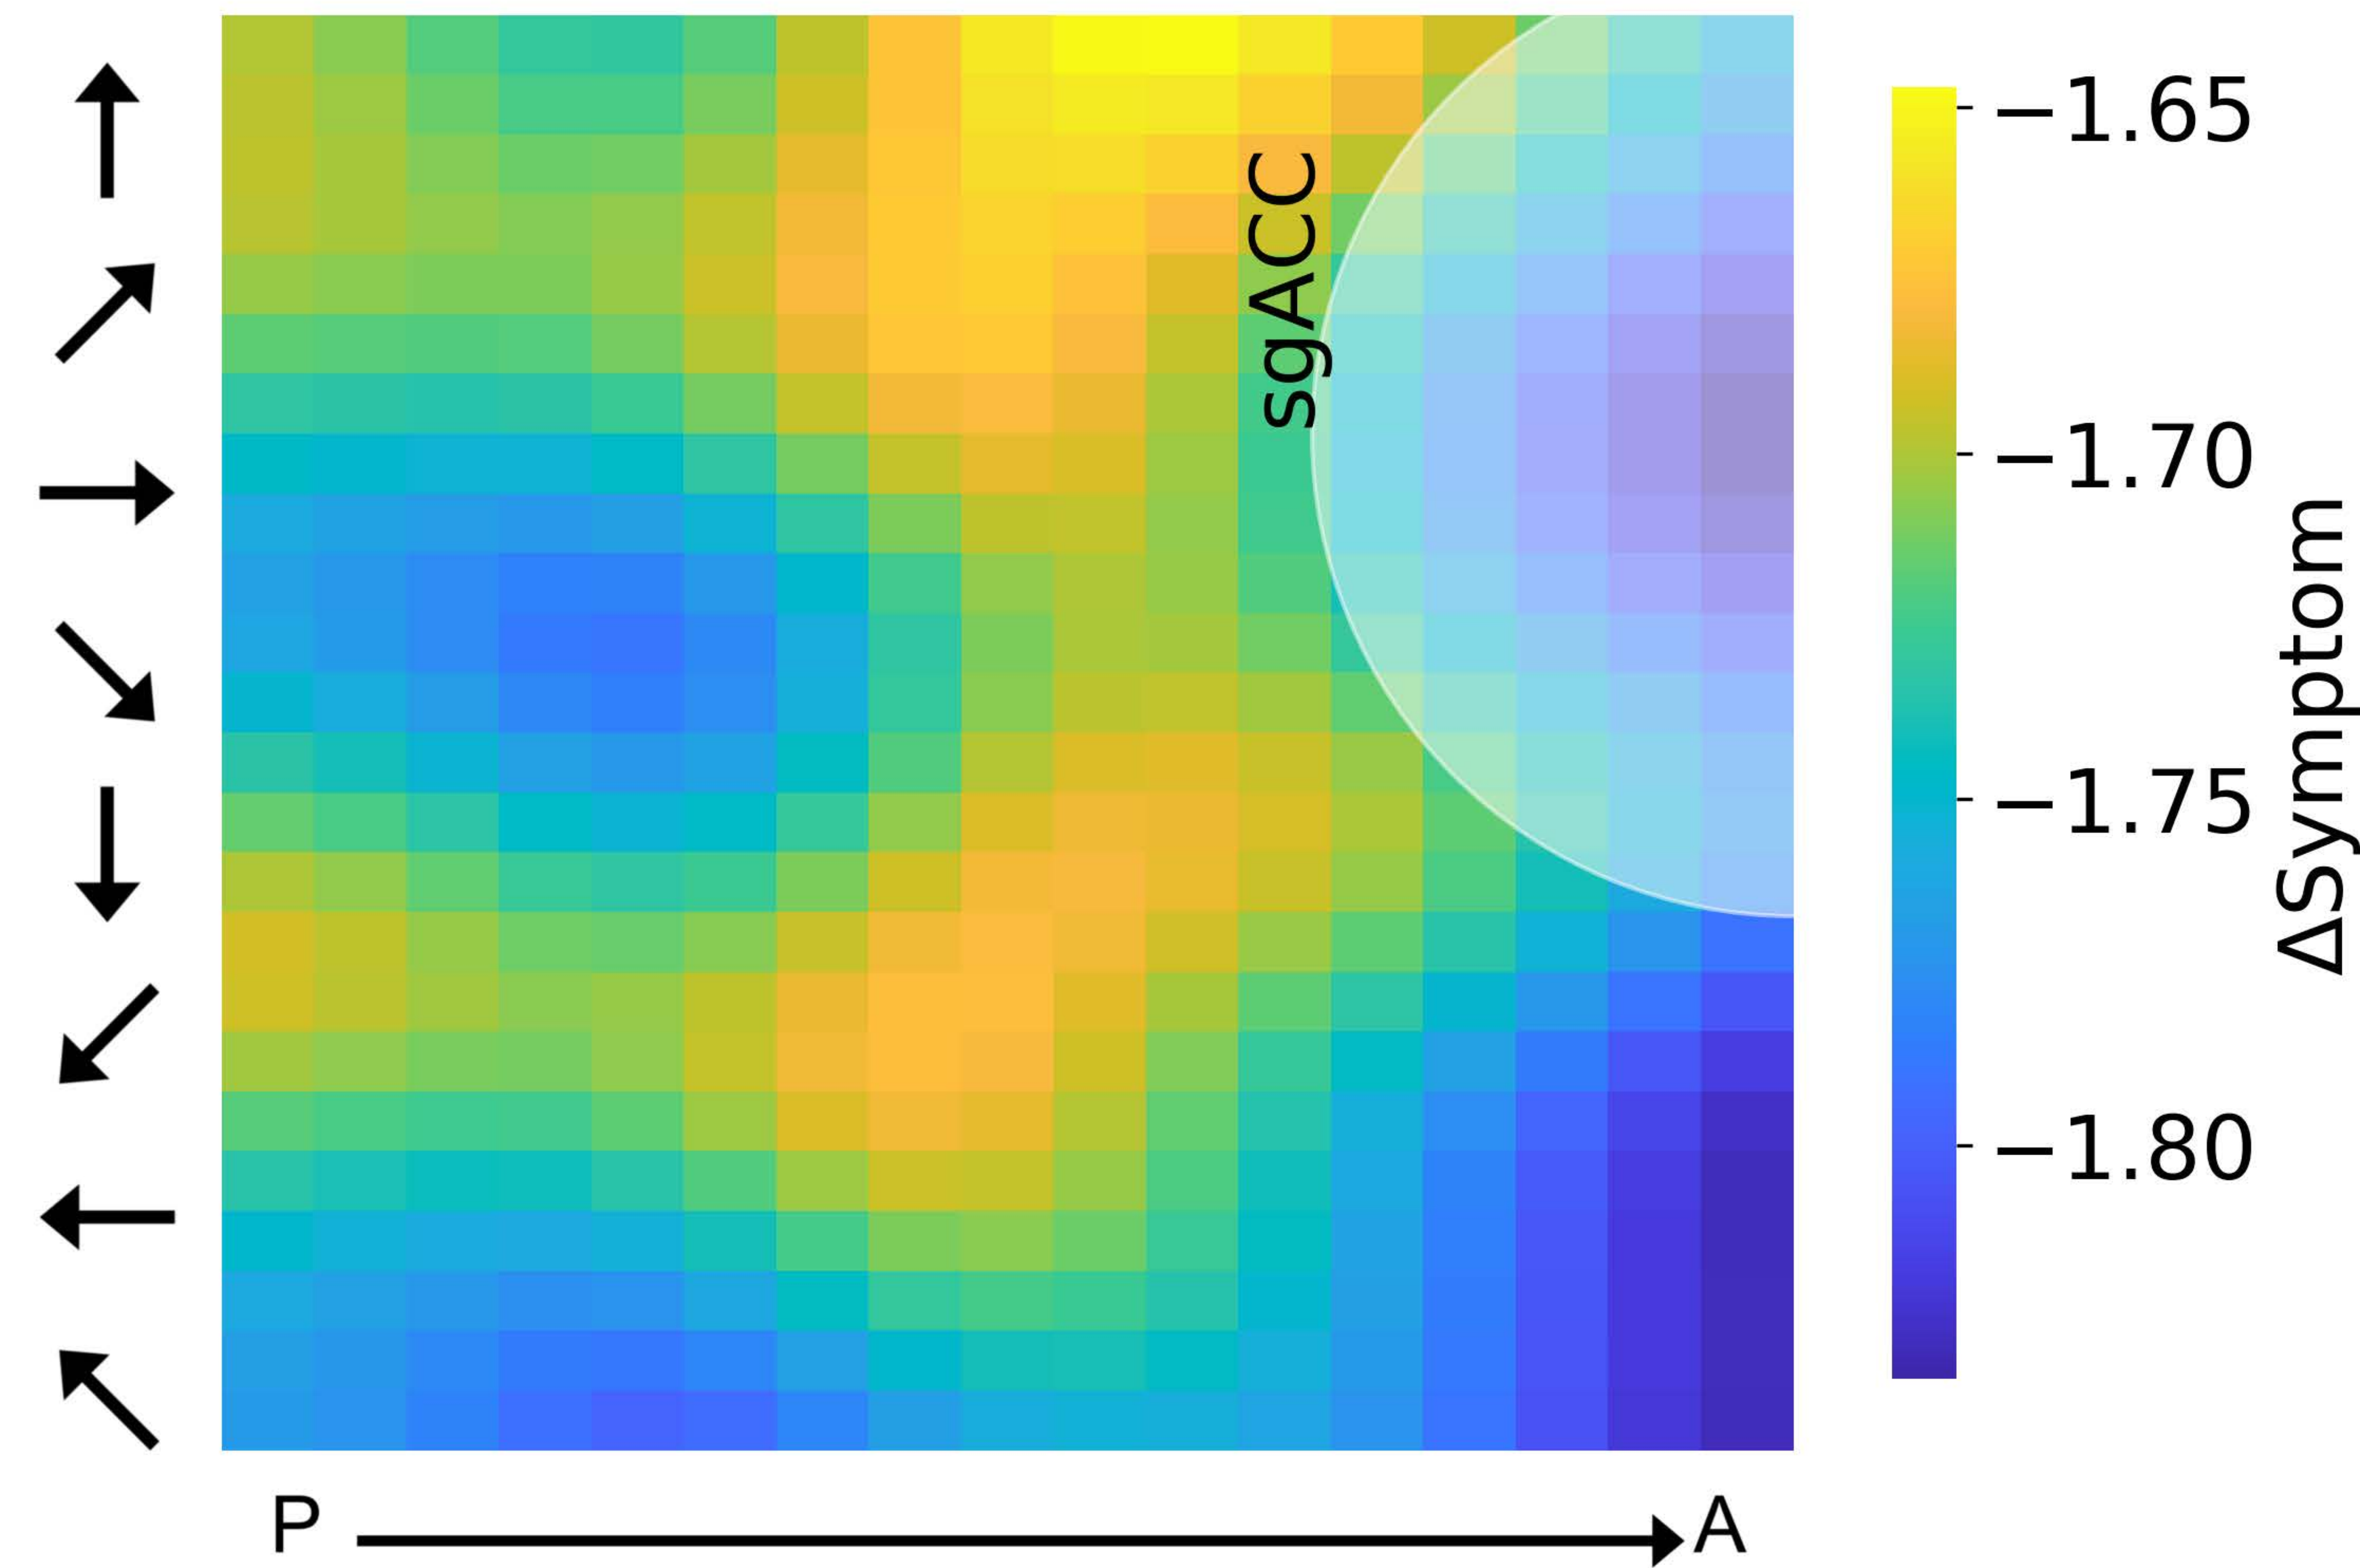



# NDAREU790BVQ\_madrs\_left\_dlpfc

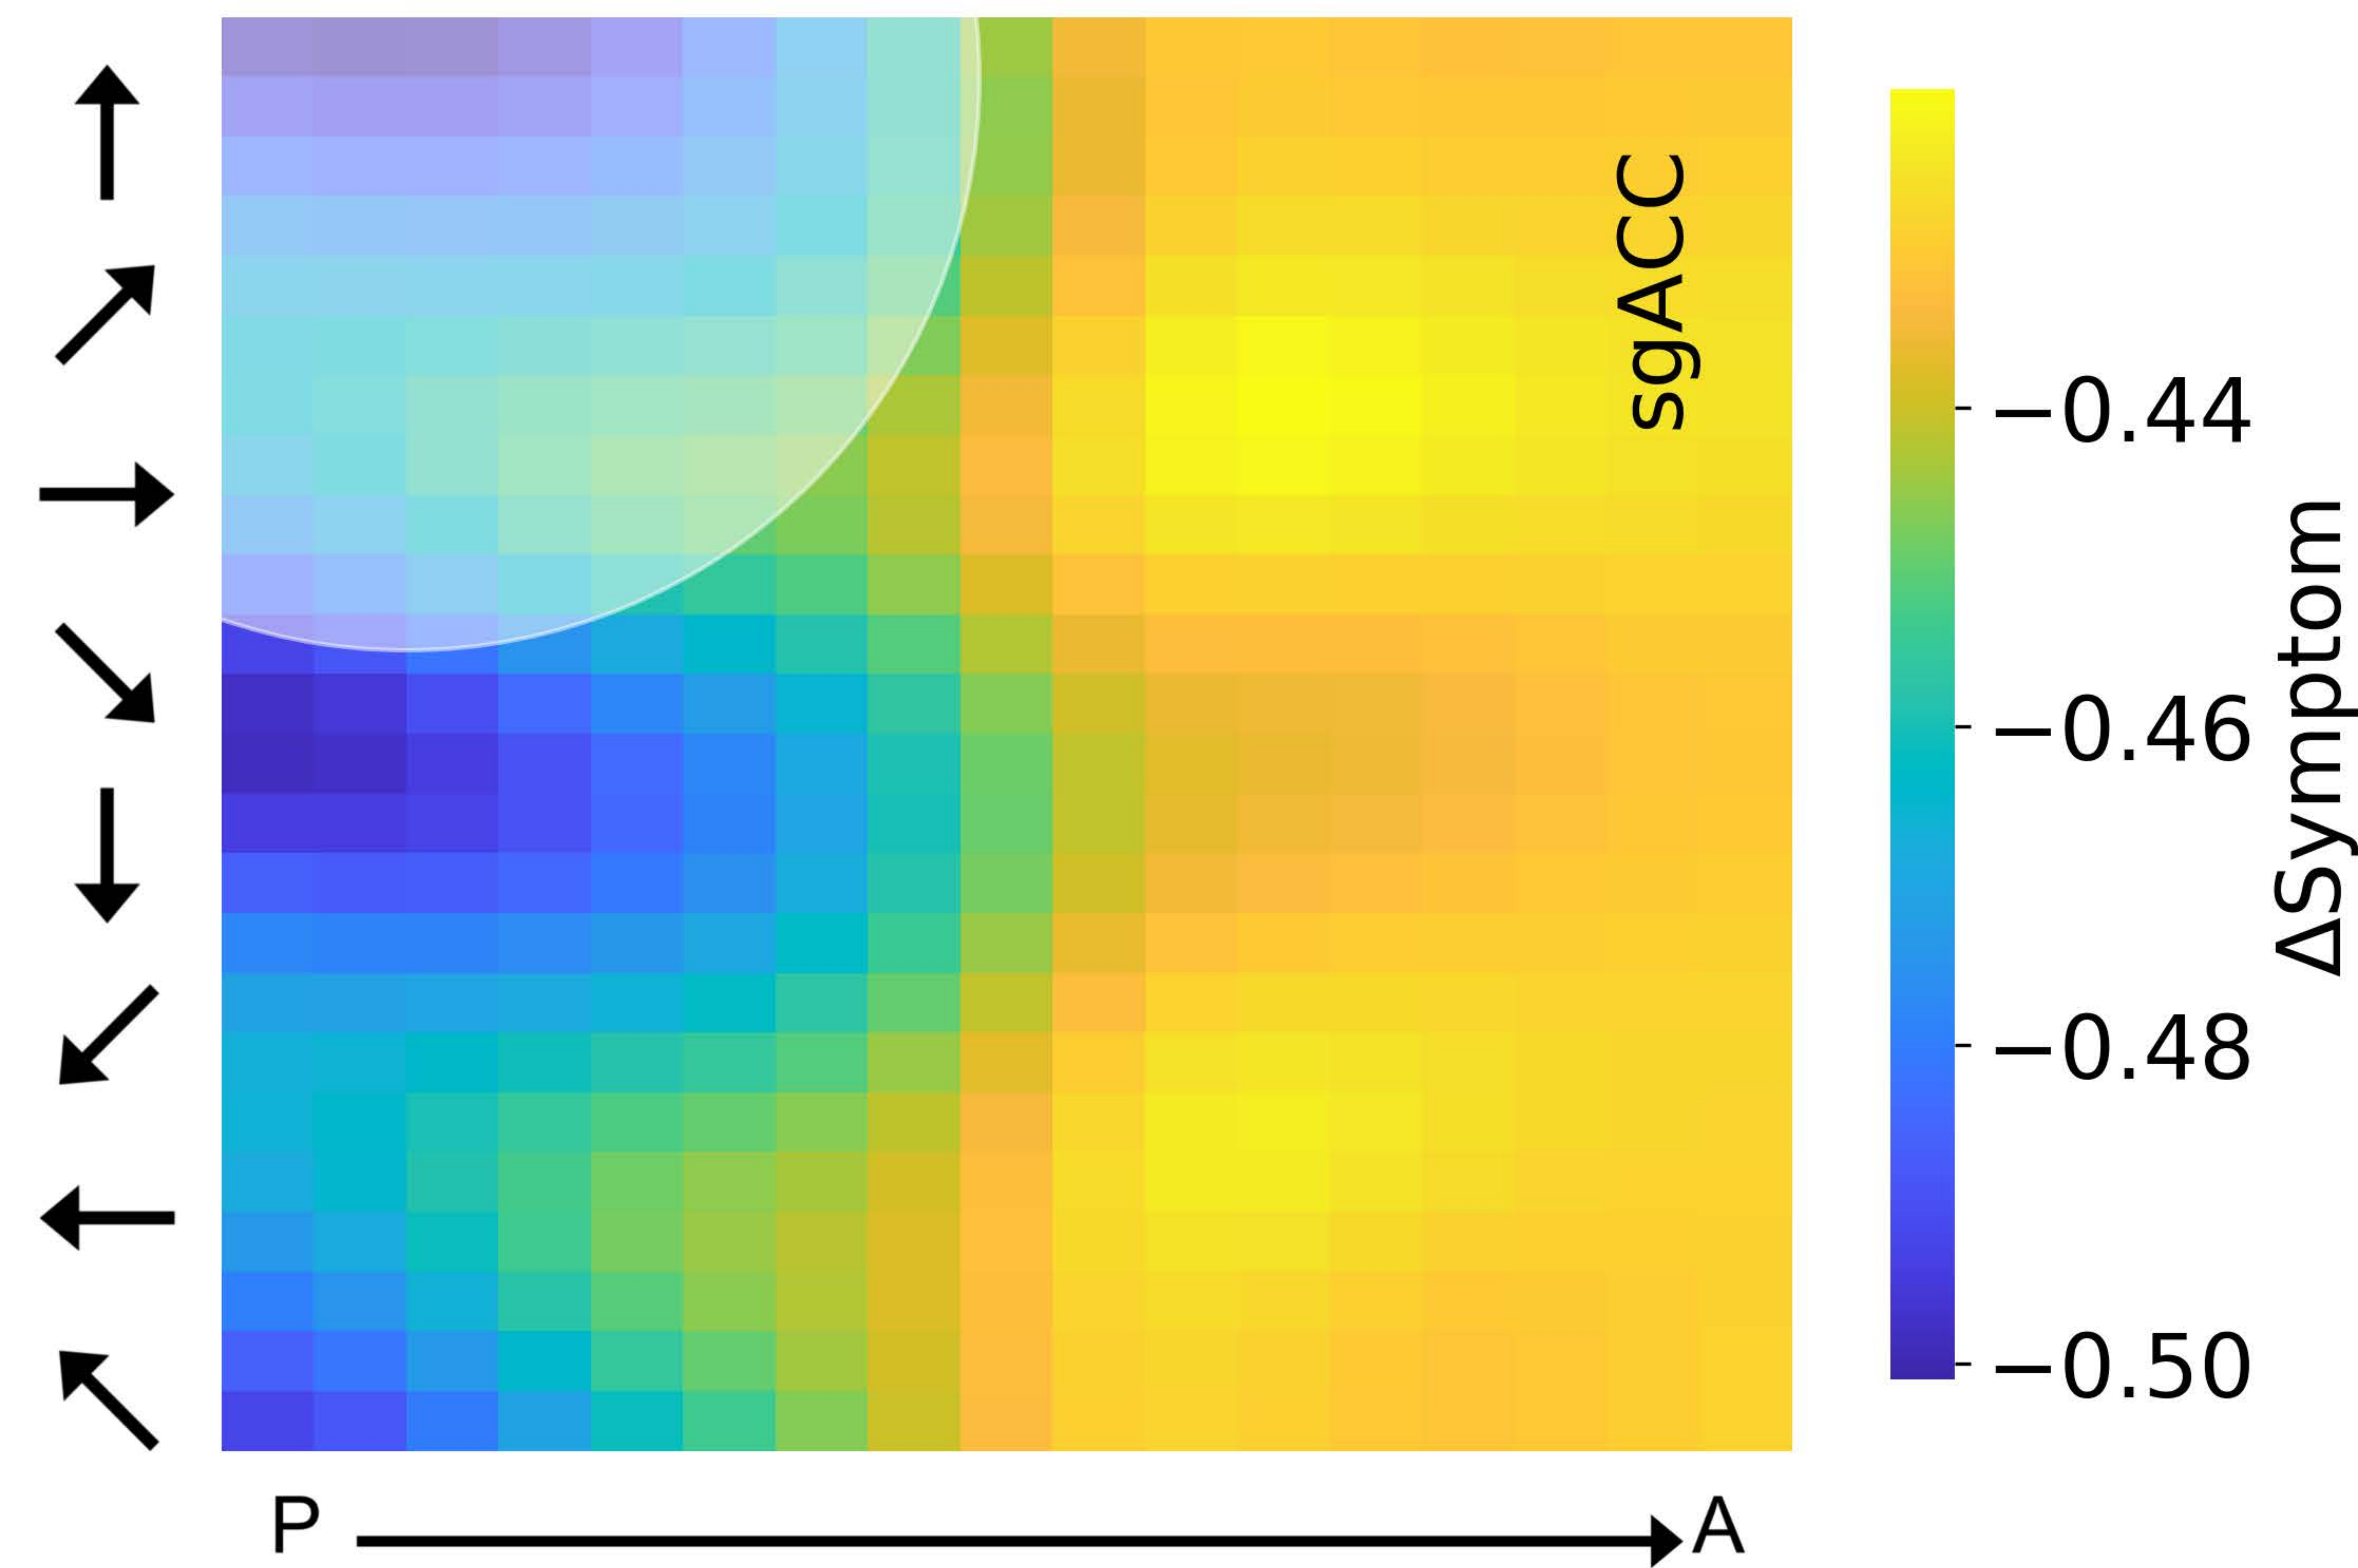



# NDARGA844BF5\_madrs\_left\_dlpfc

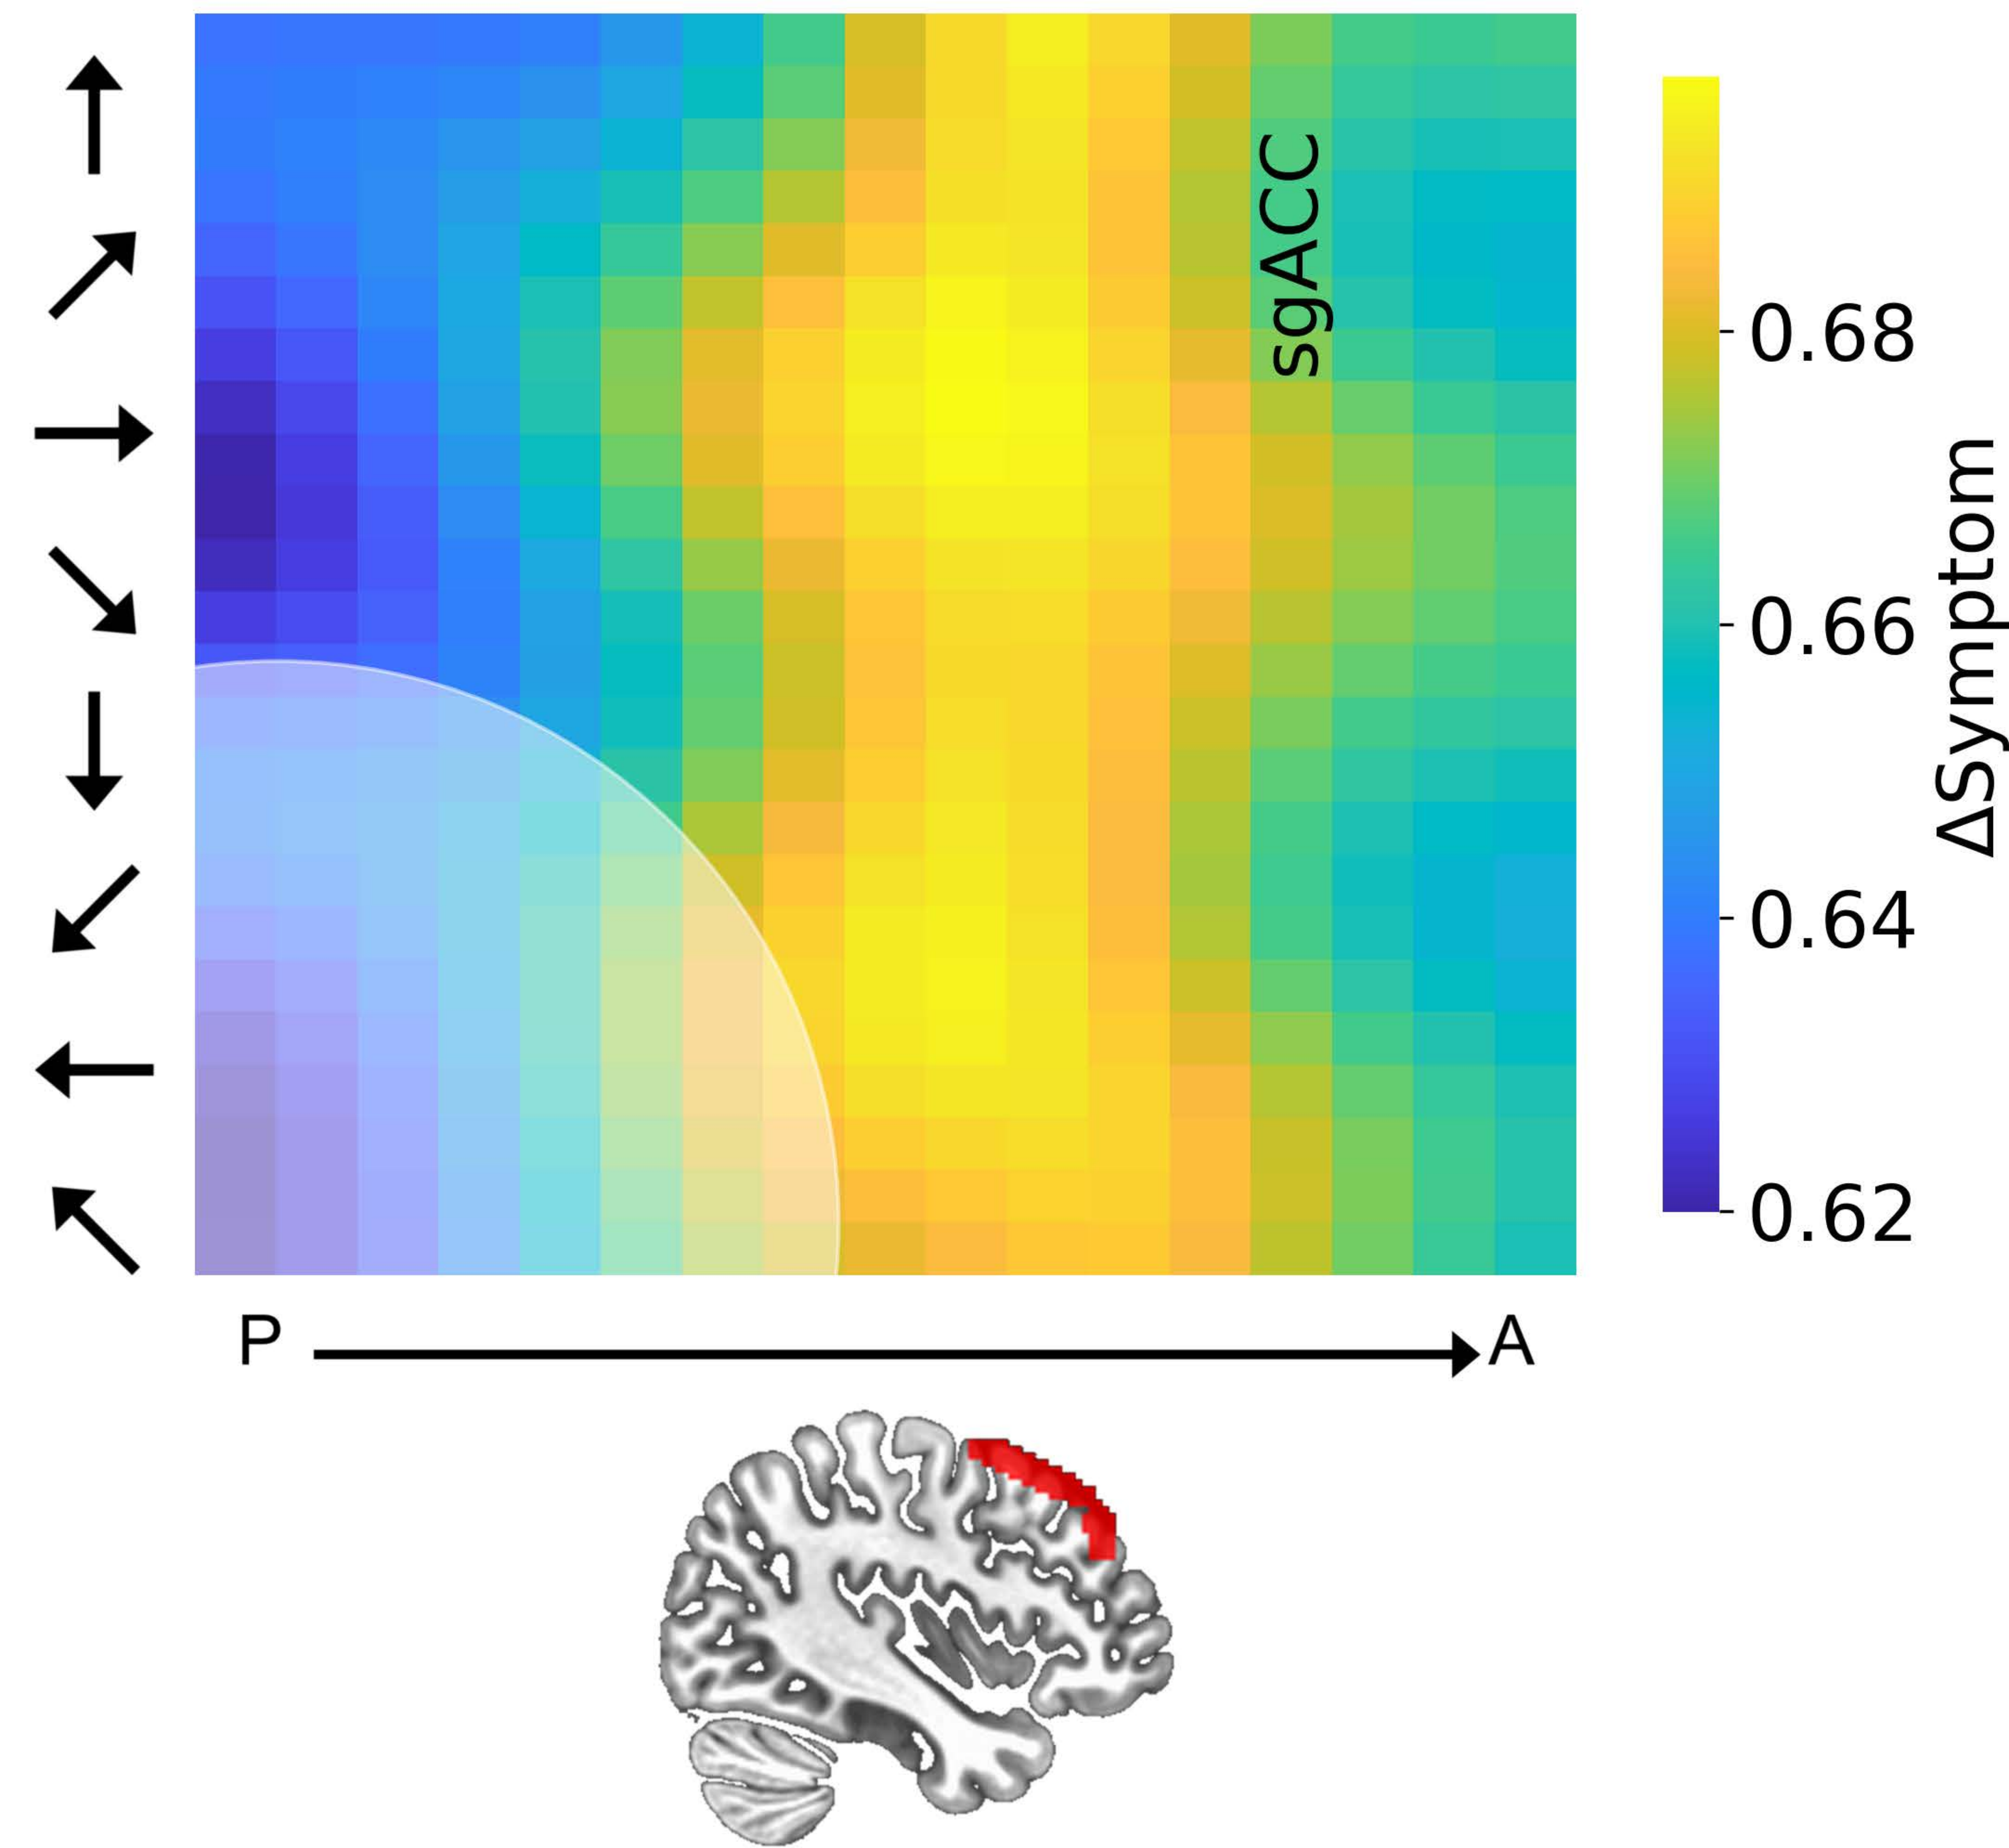



# NDARGN596ENP\_madrs\_left\_dlpfc

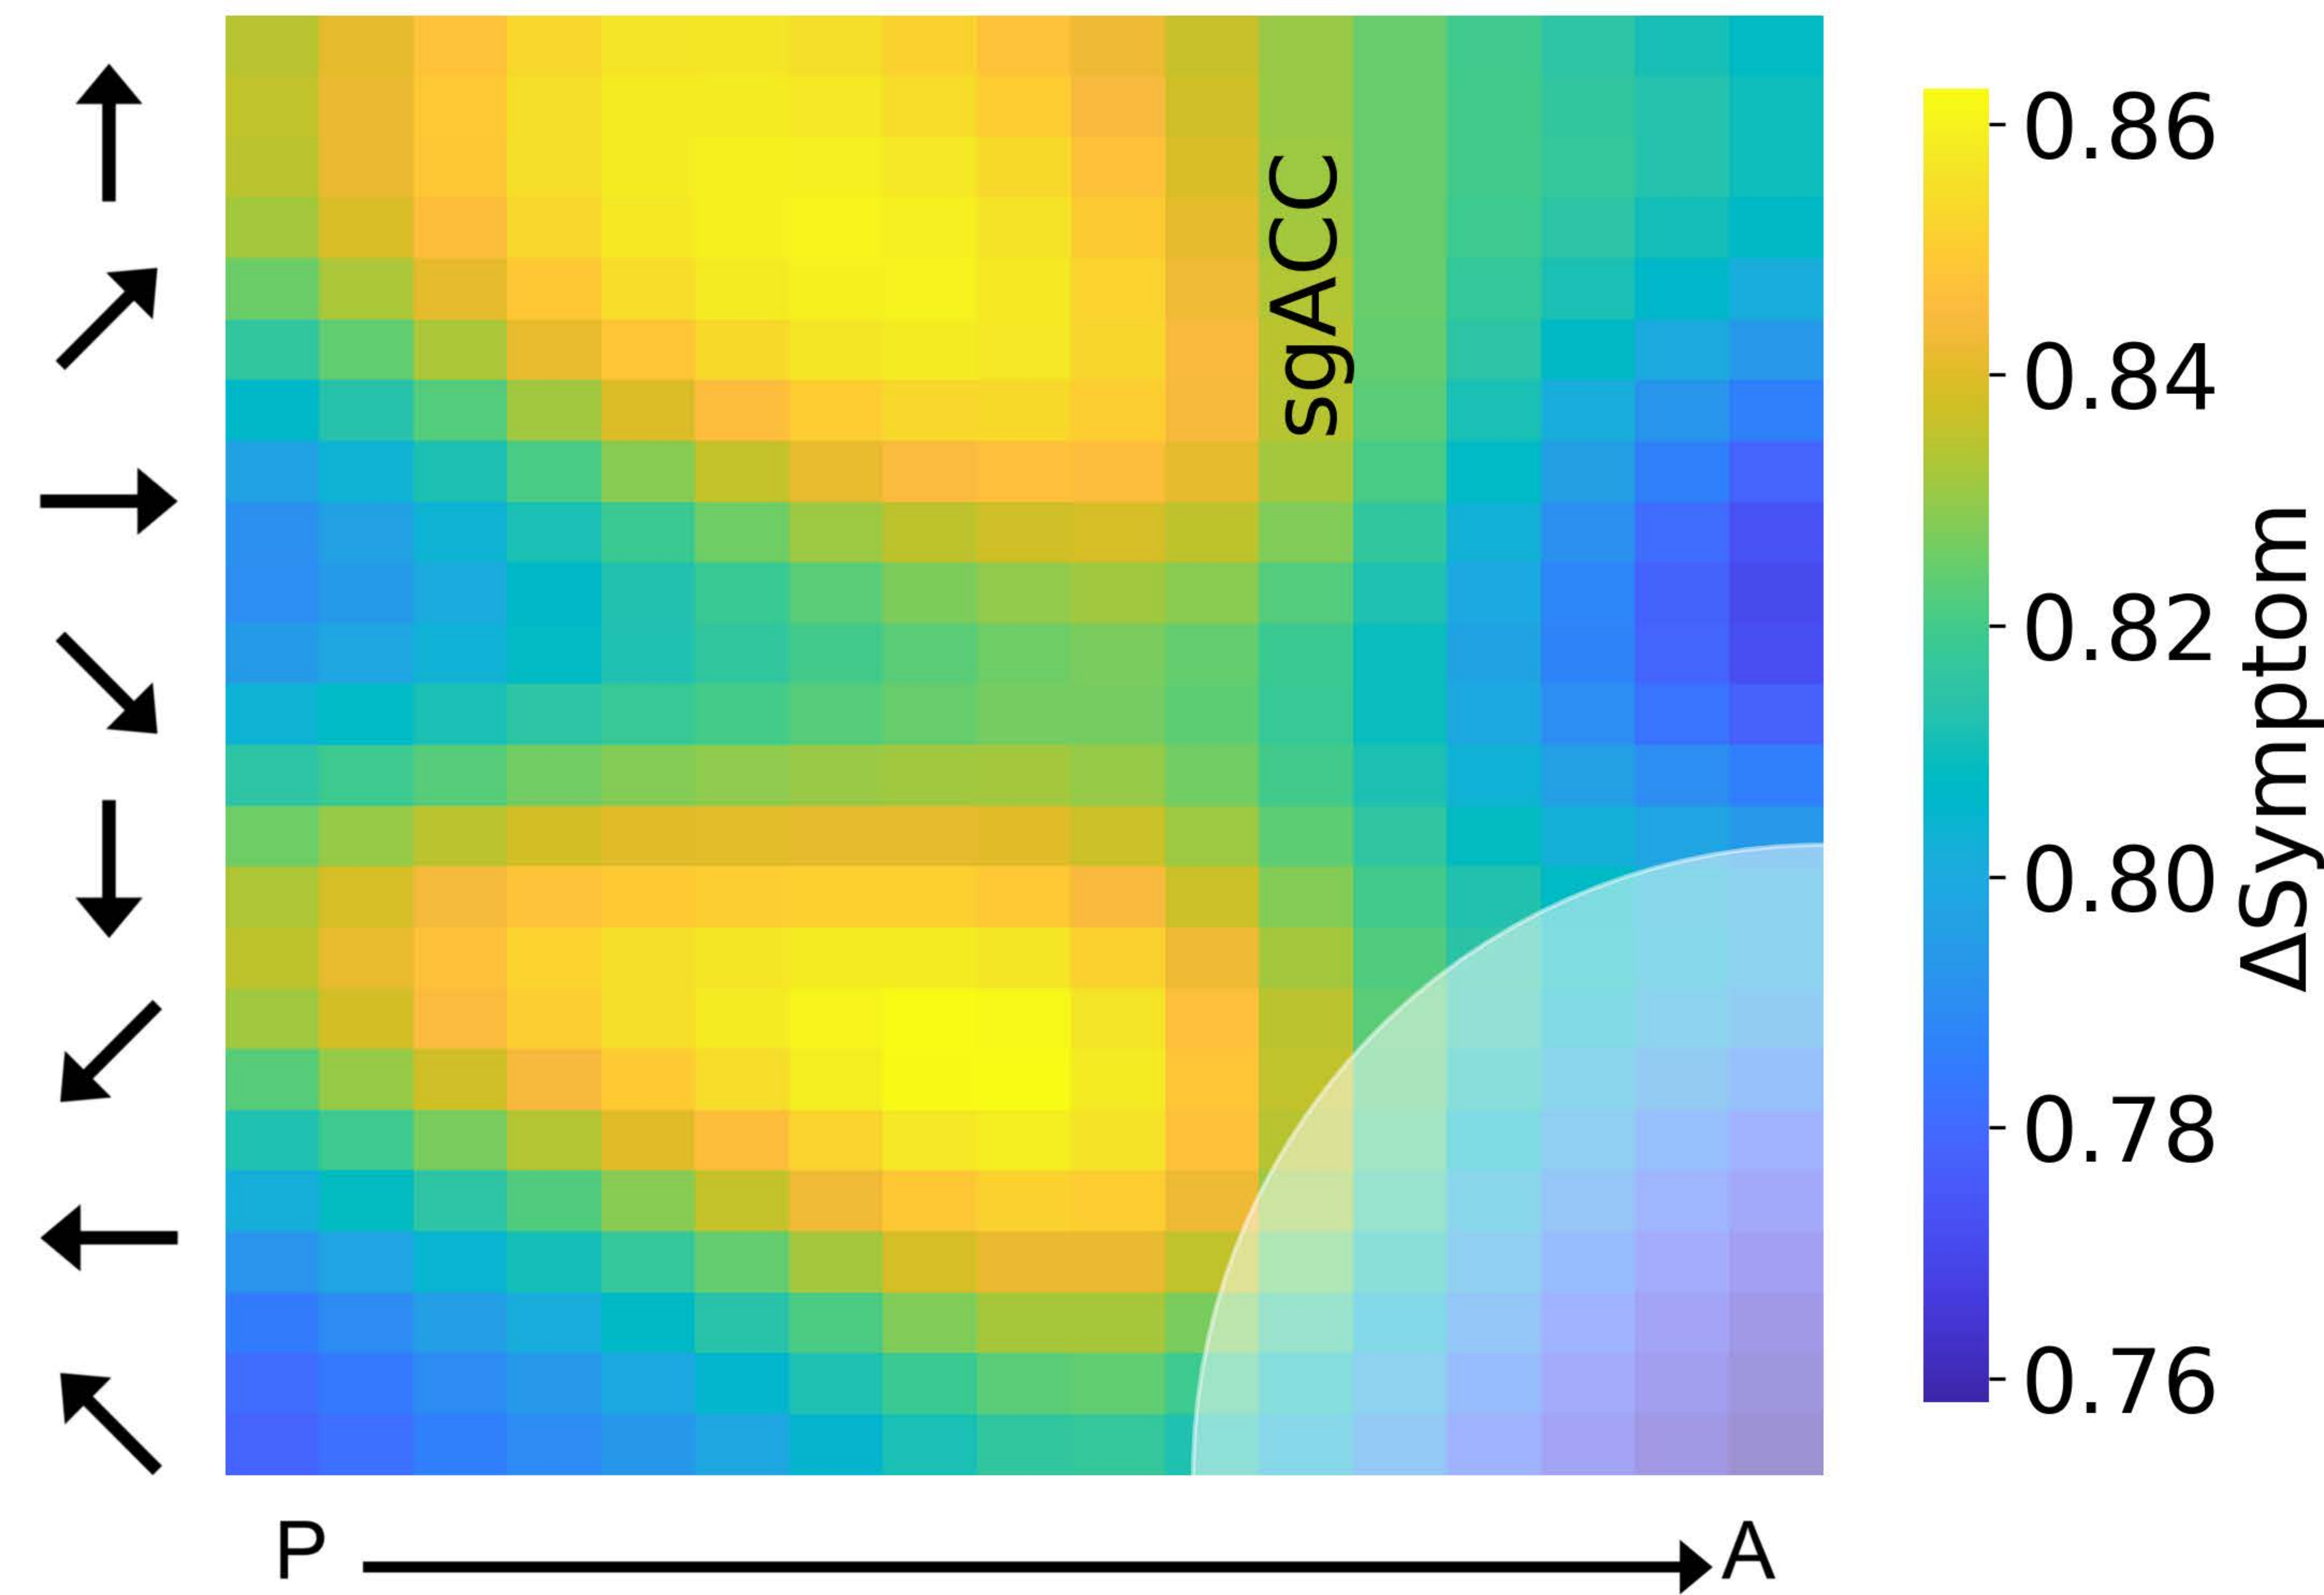



# NDARHU677DFF\_madrs\_left\_dlpfc

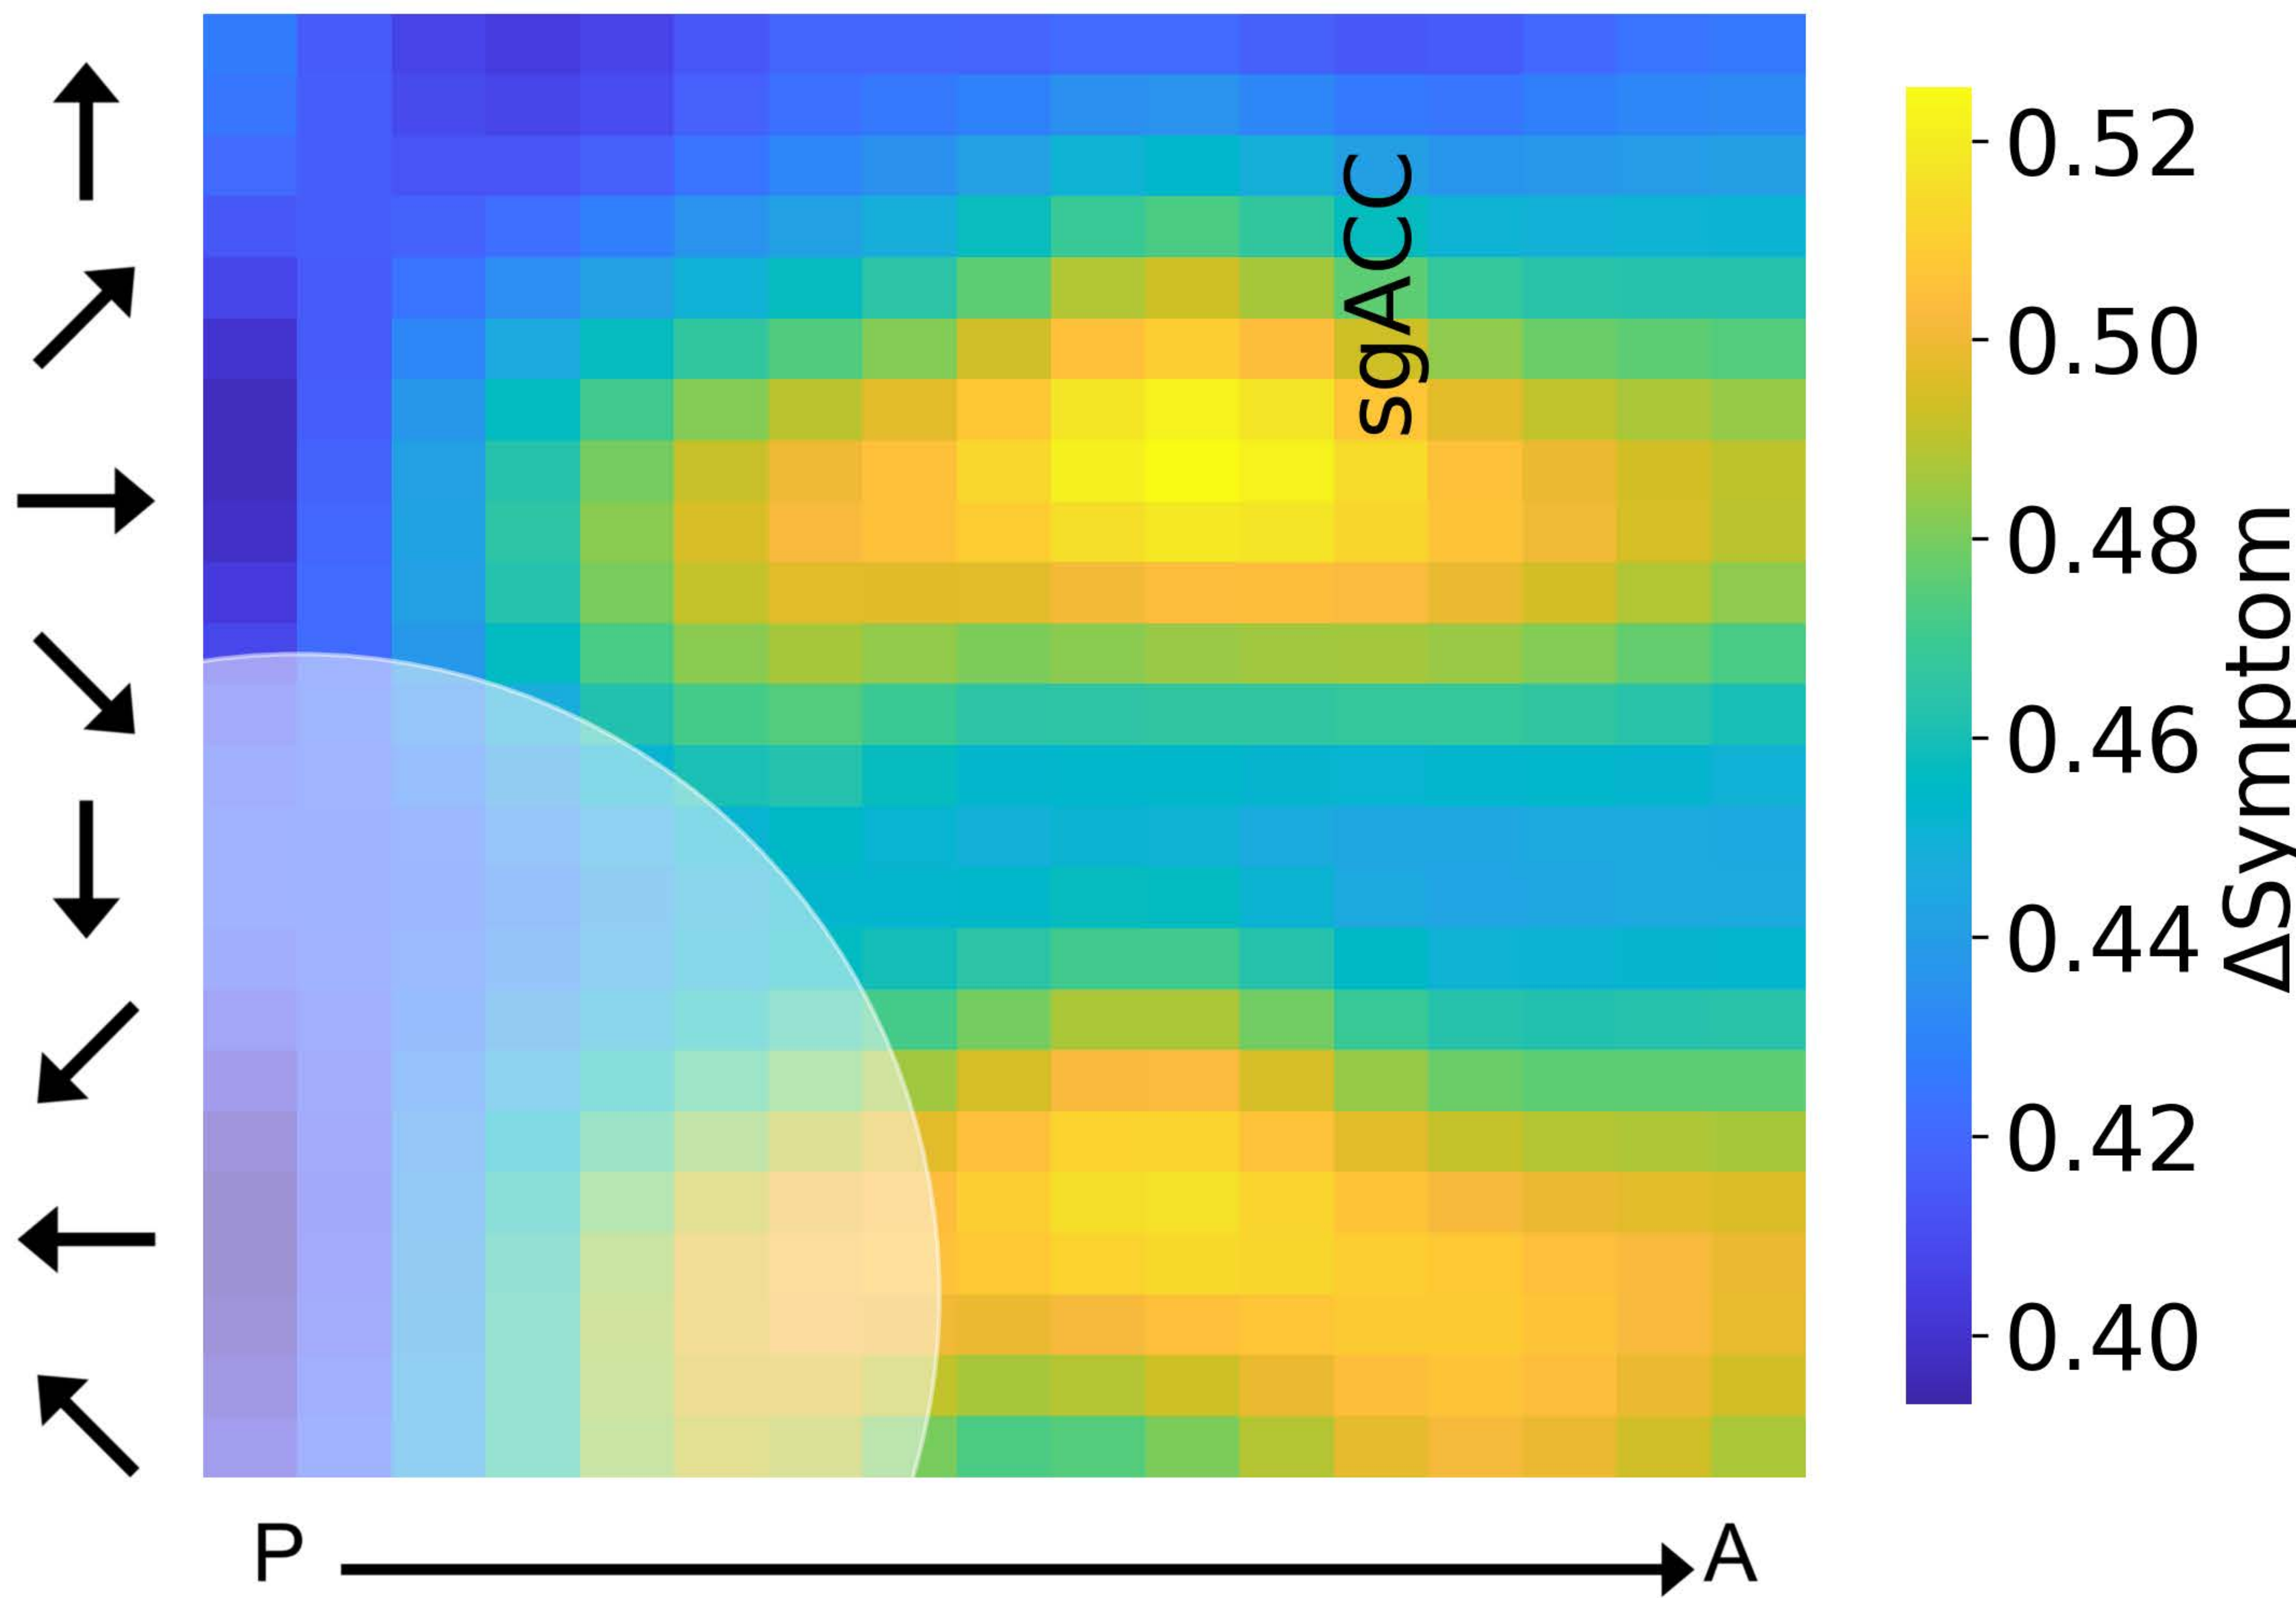



NDARJL083WMP\_madrs\_left\_dlpfc

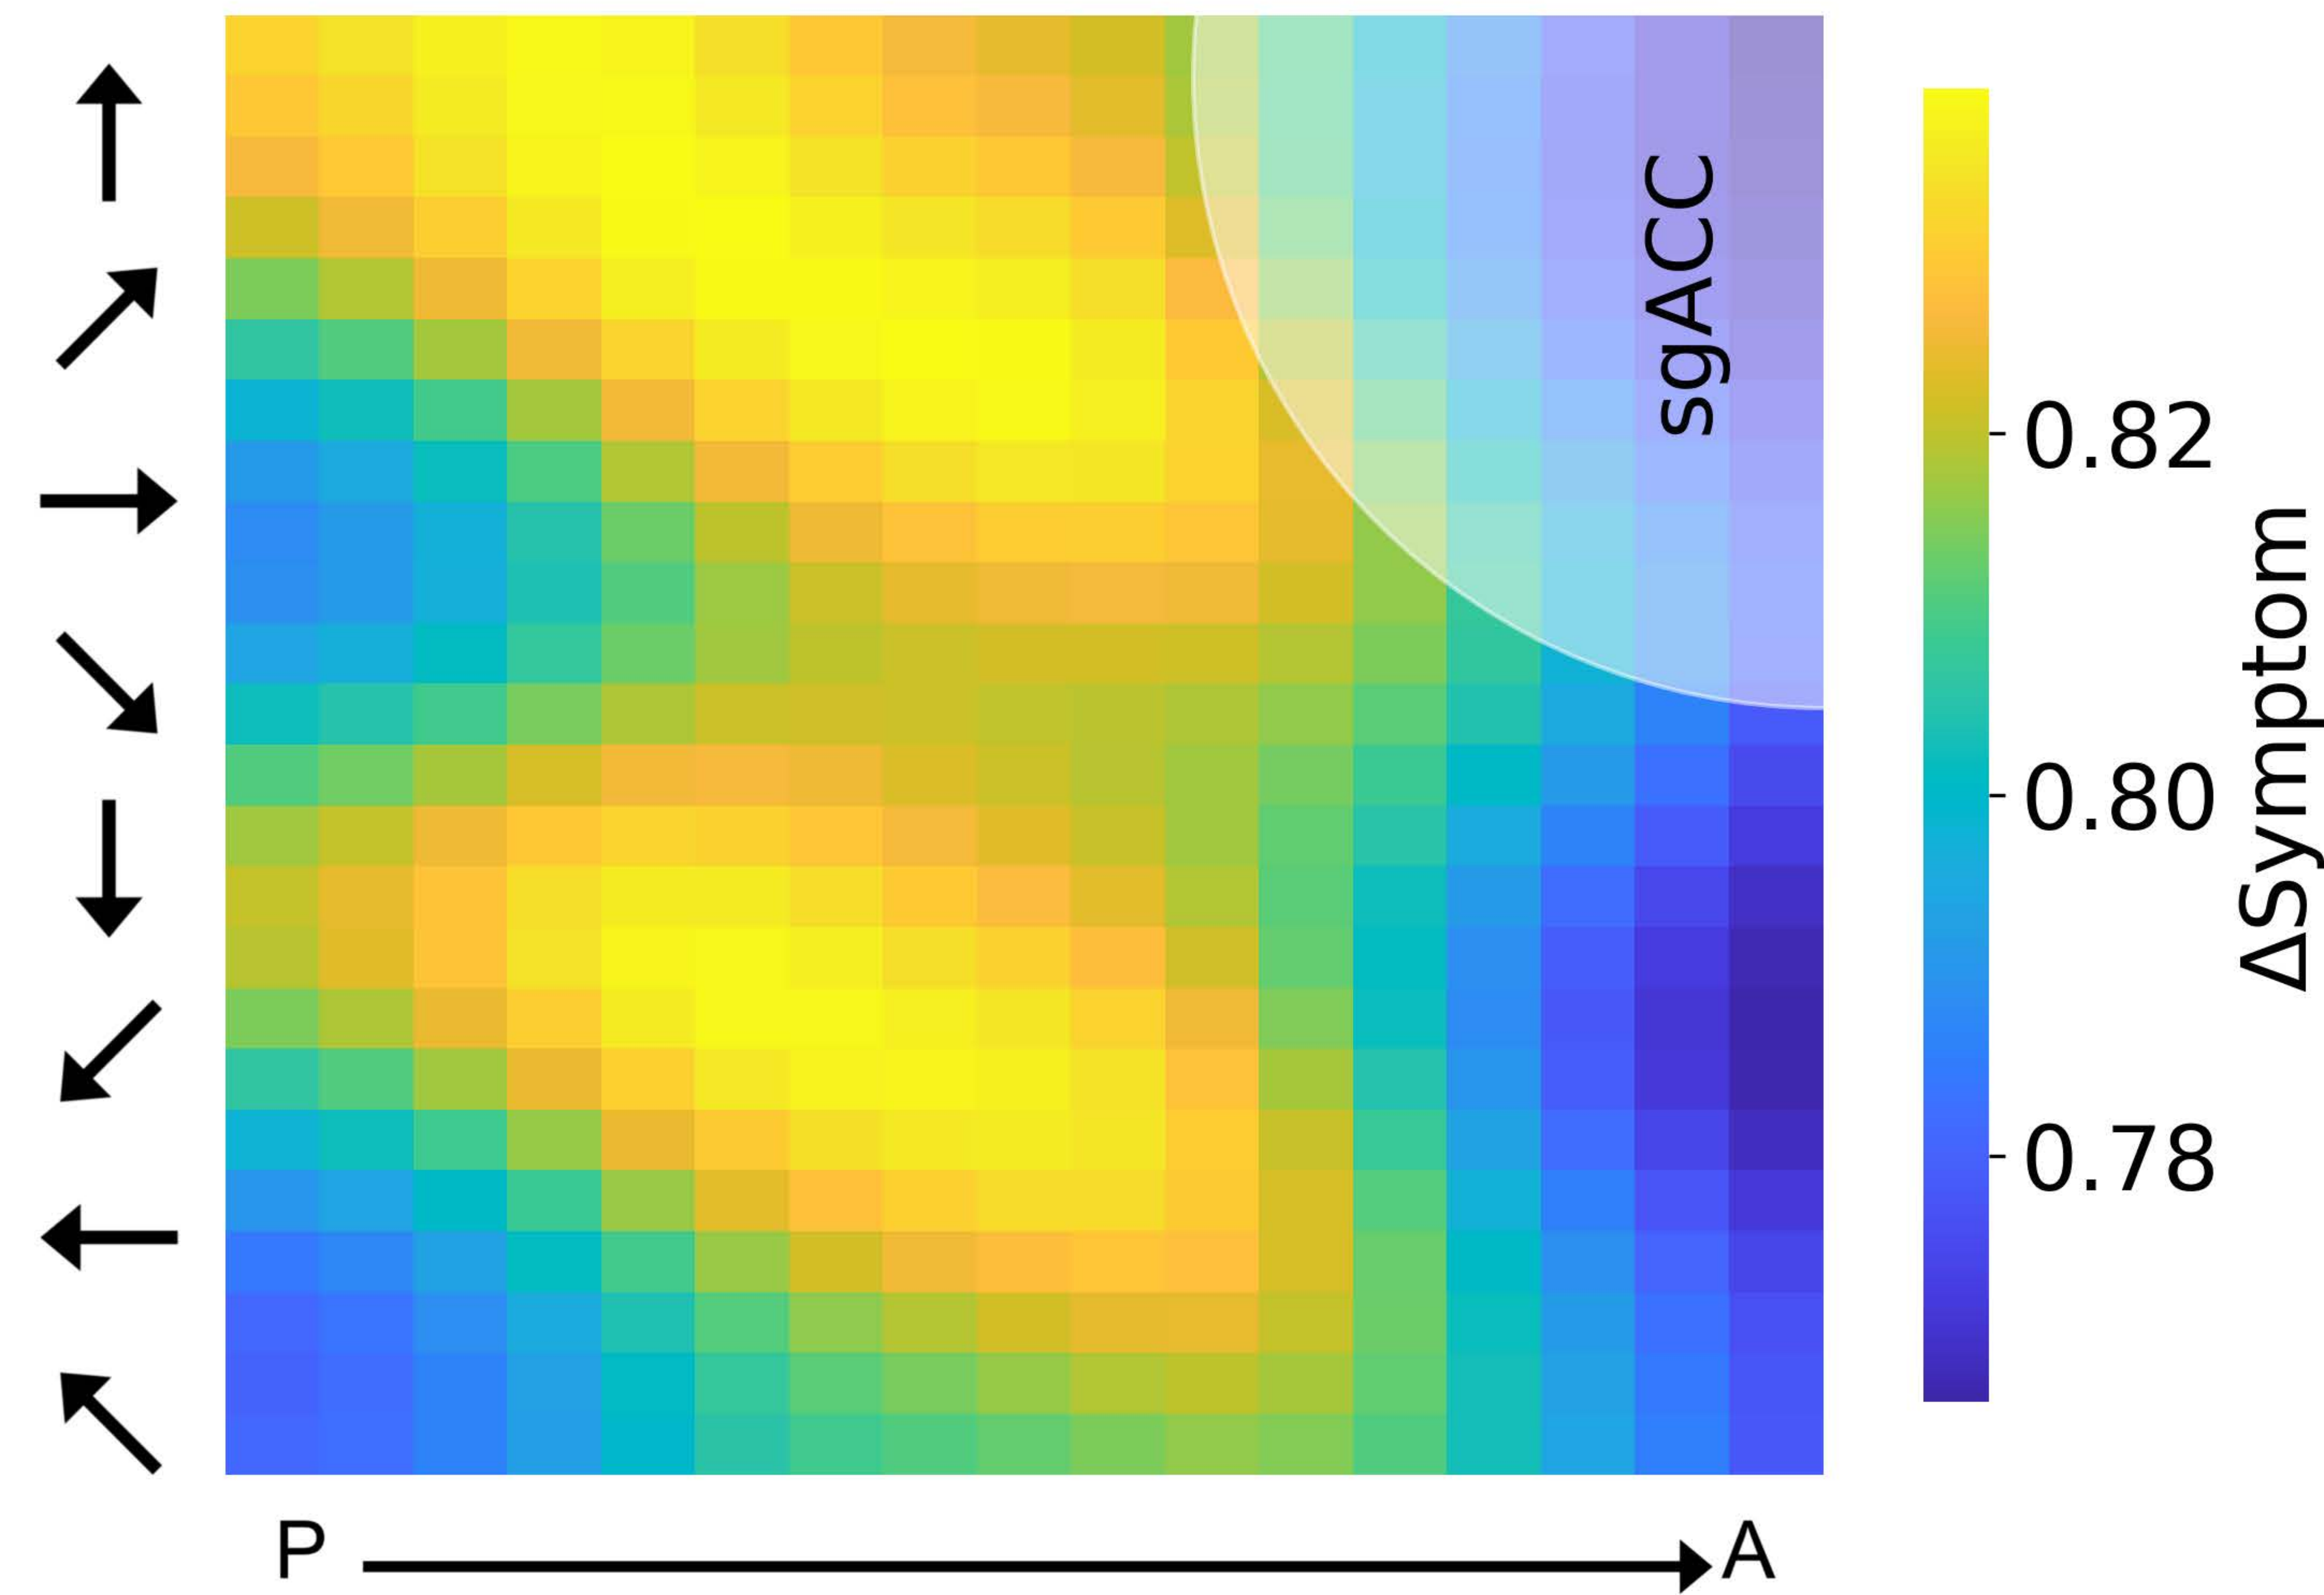



# NDARKR291PWN\_madr\_left\_dlpfc

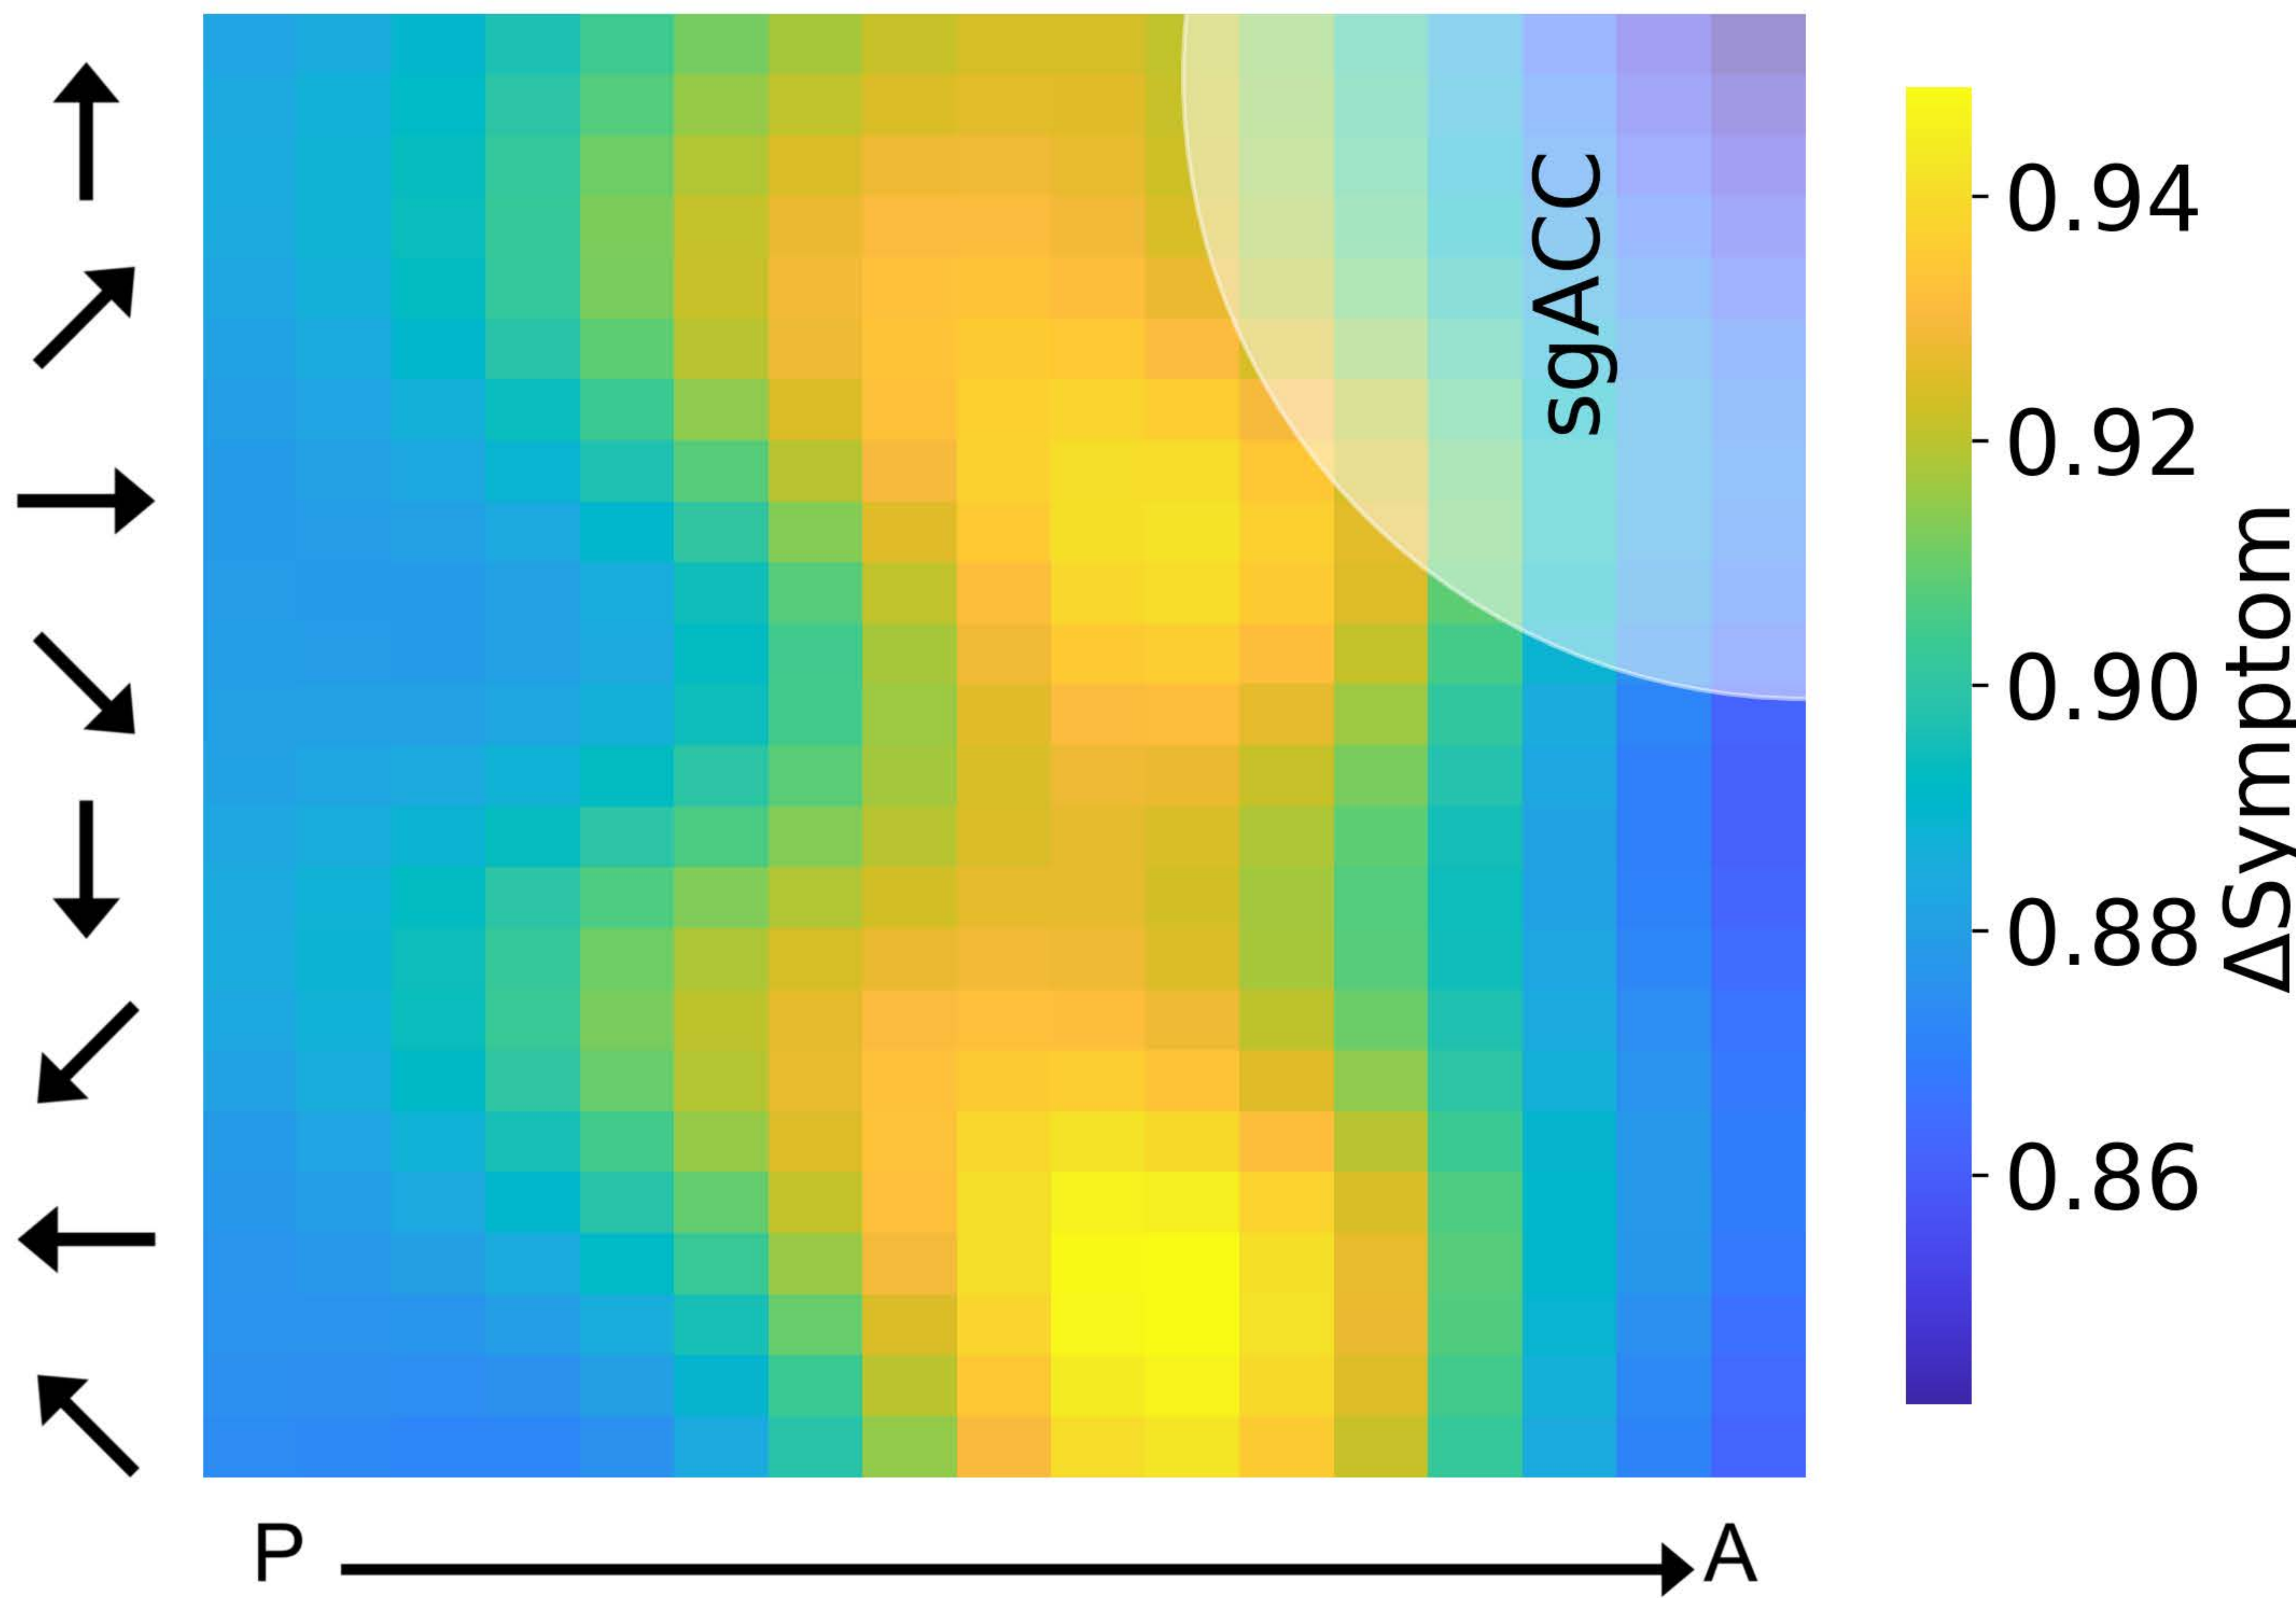



# NDARLH479MBF\_madrs\_left\_dlpfc

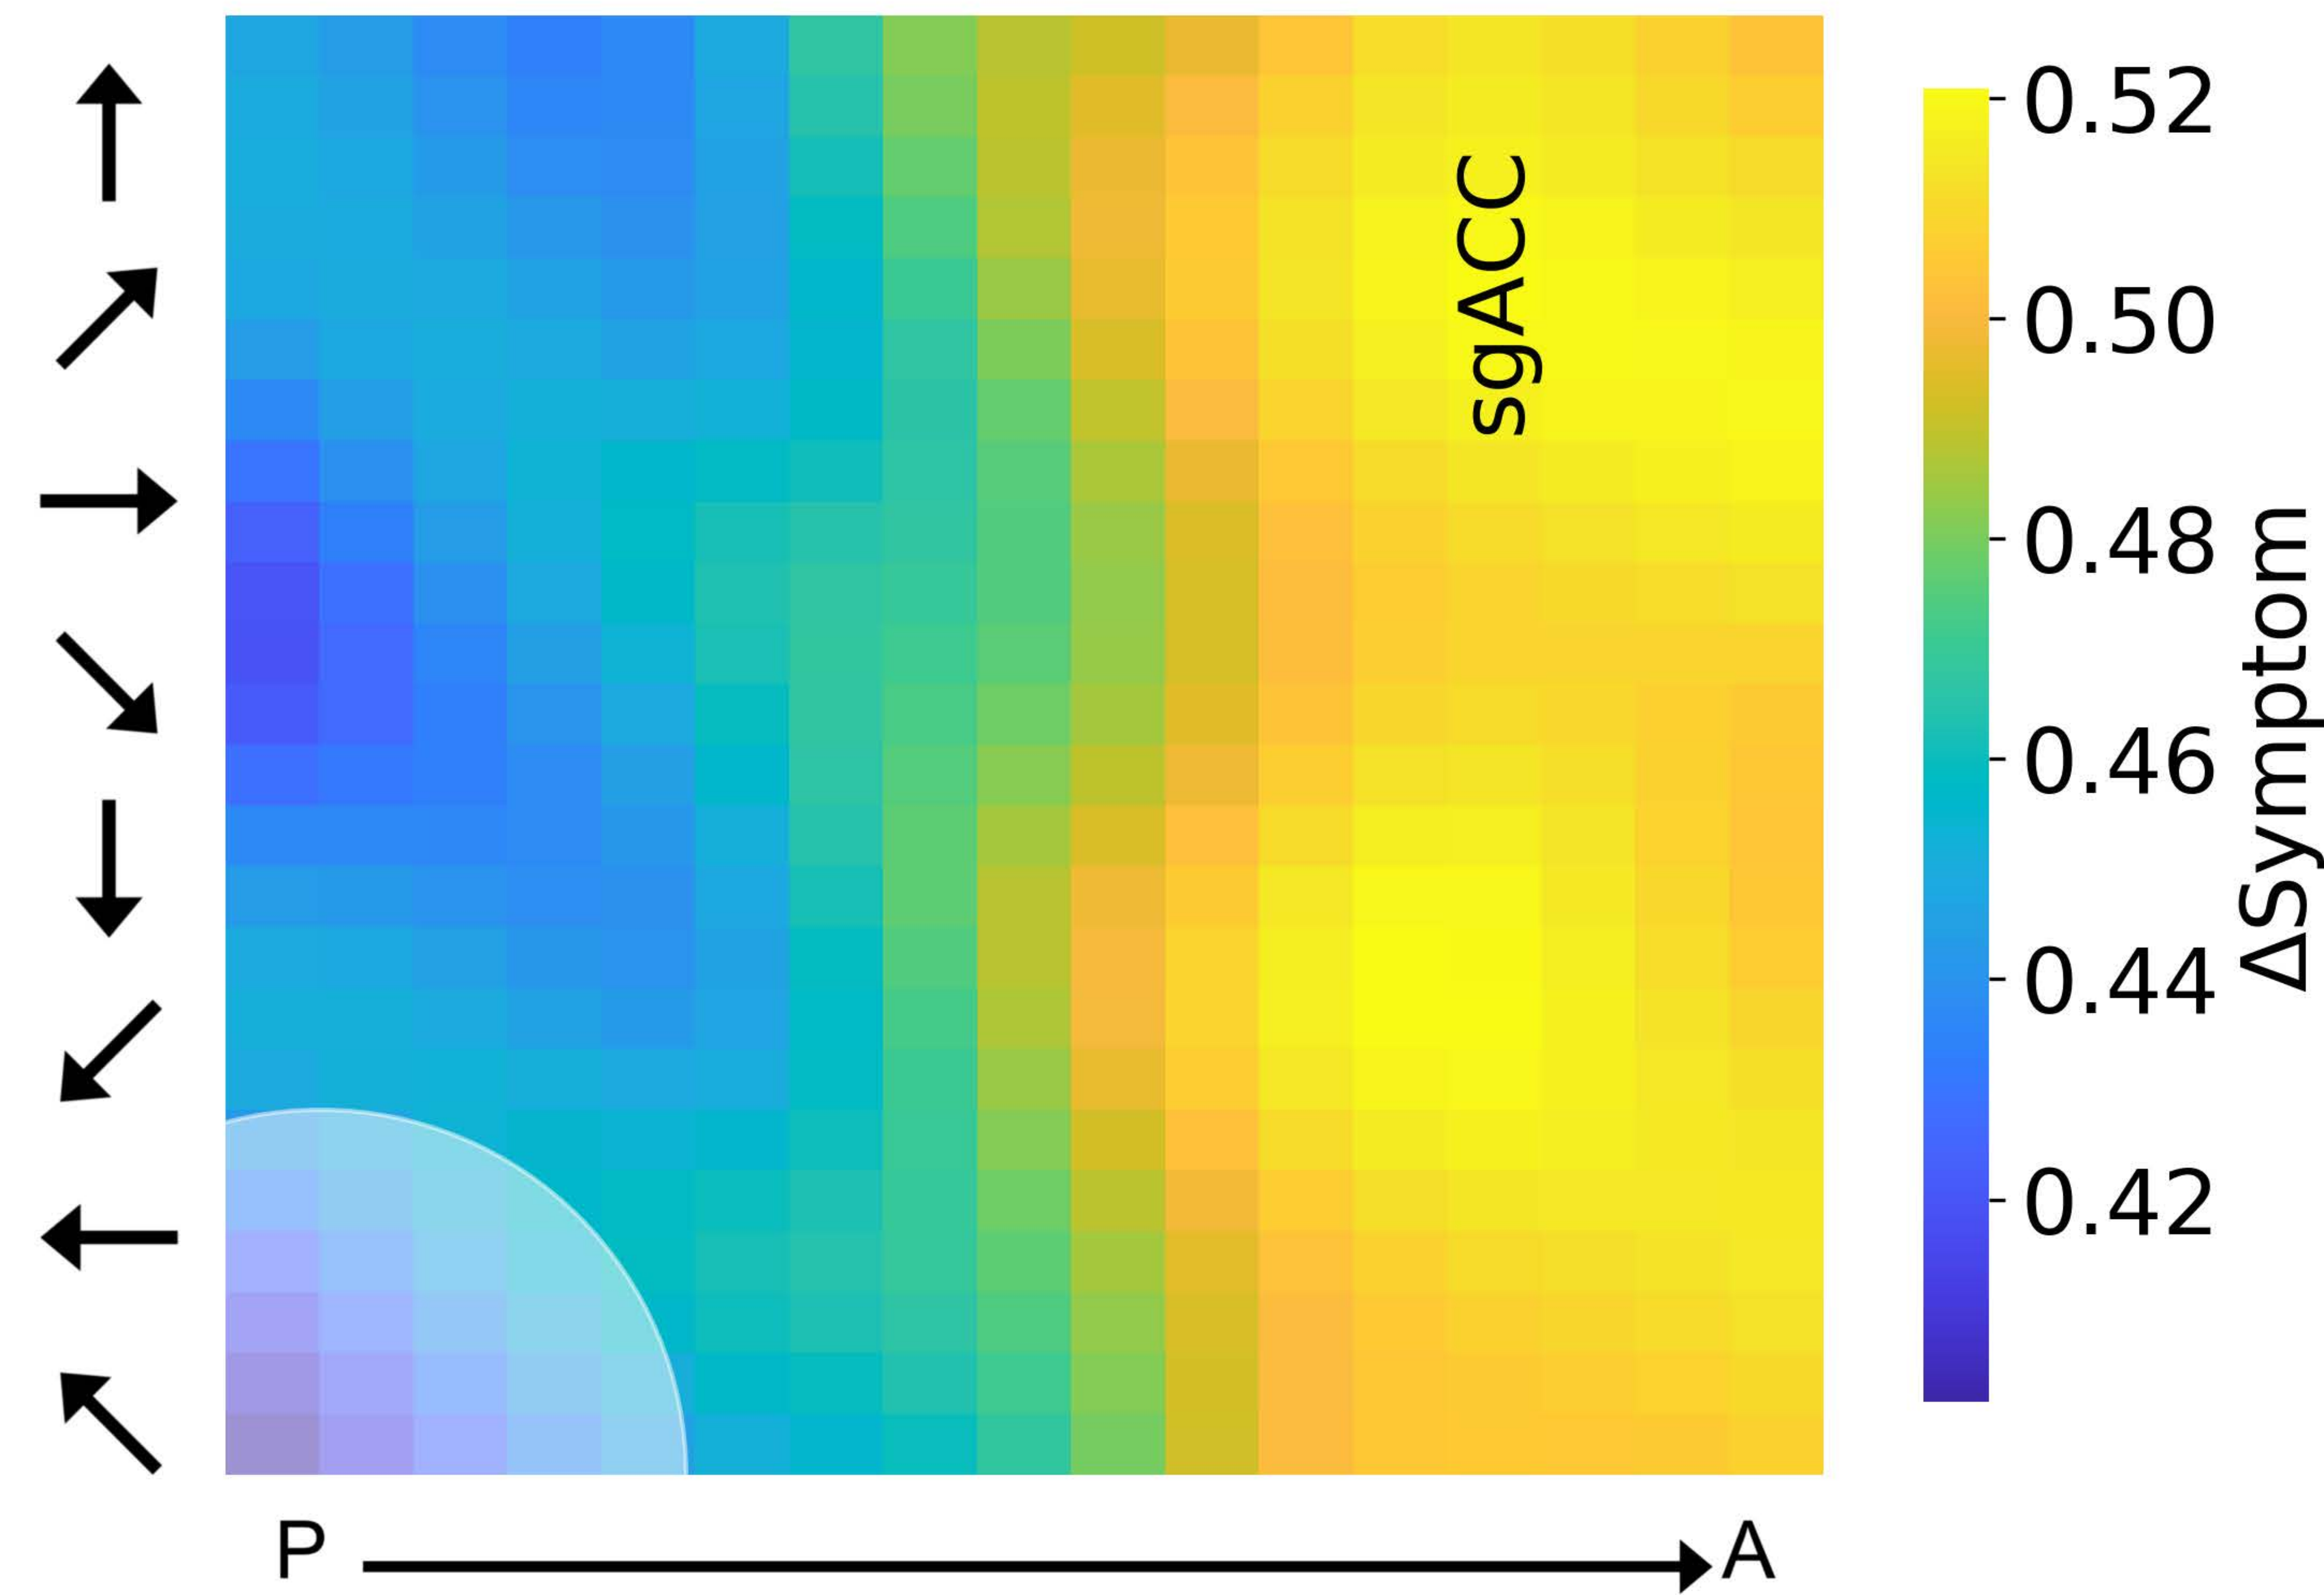



# NDARME497RF8\_madrs\_left\_dlpfc

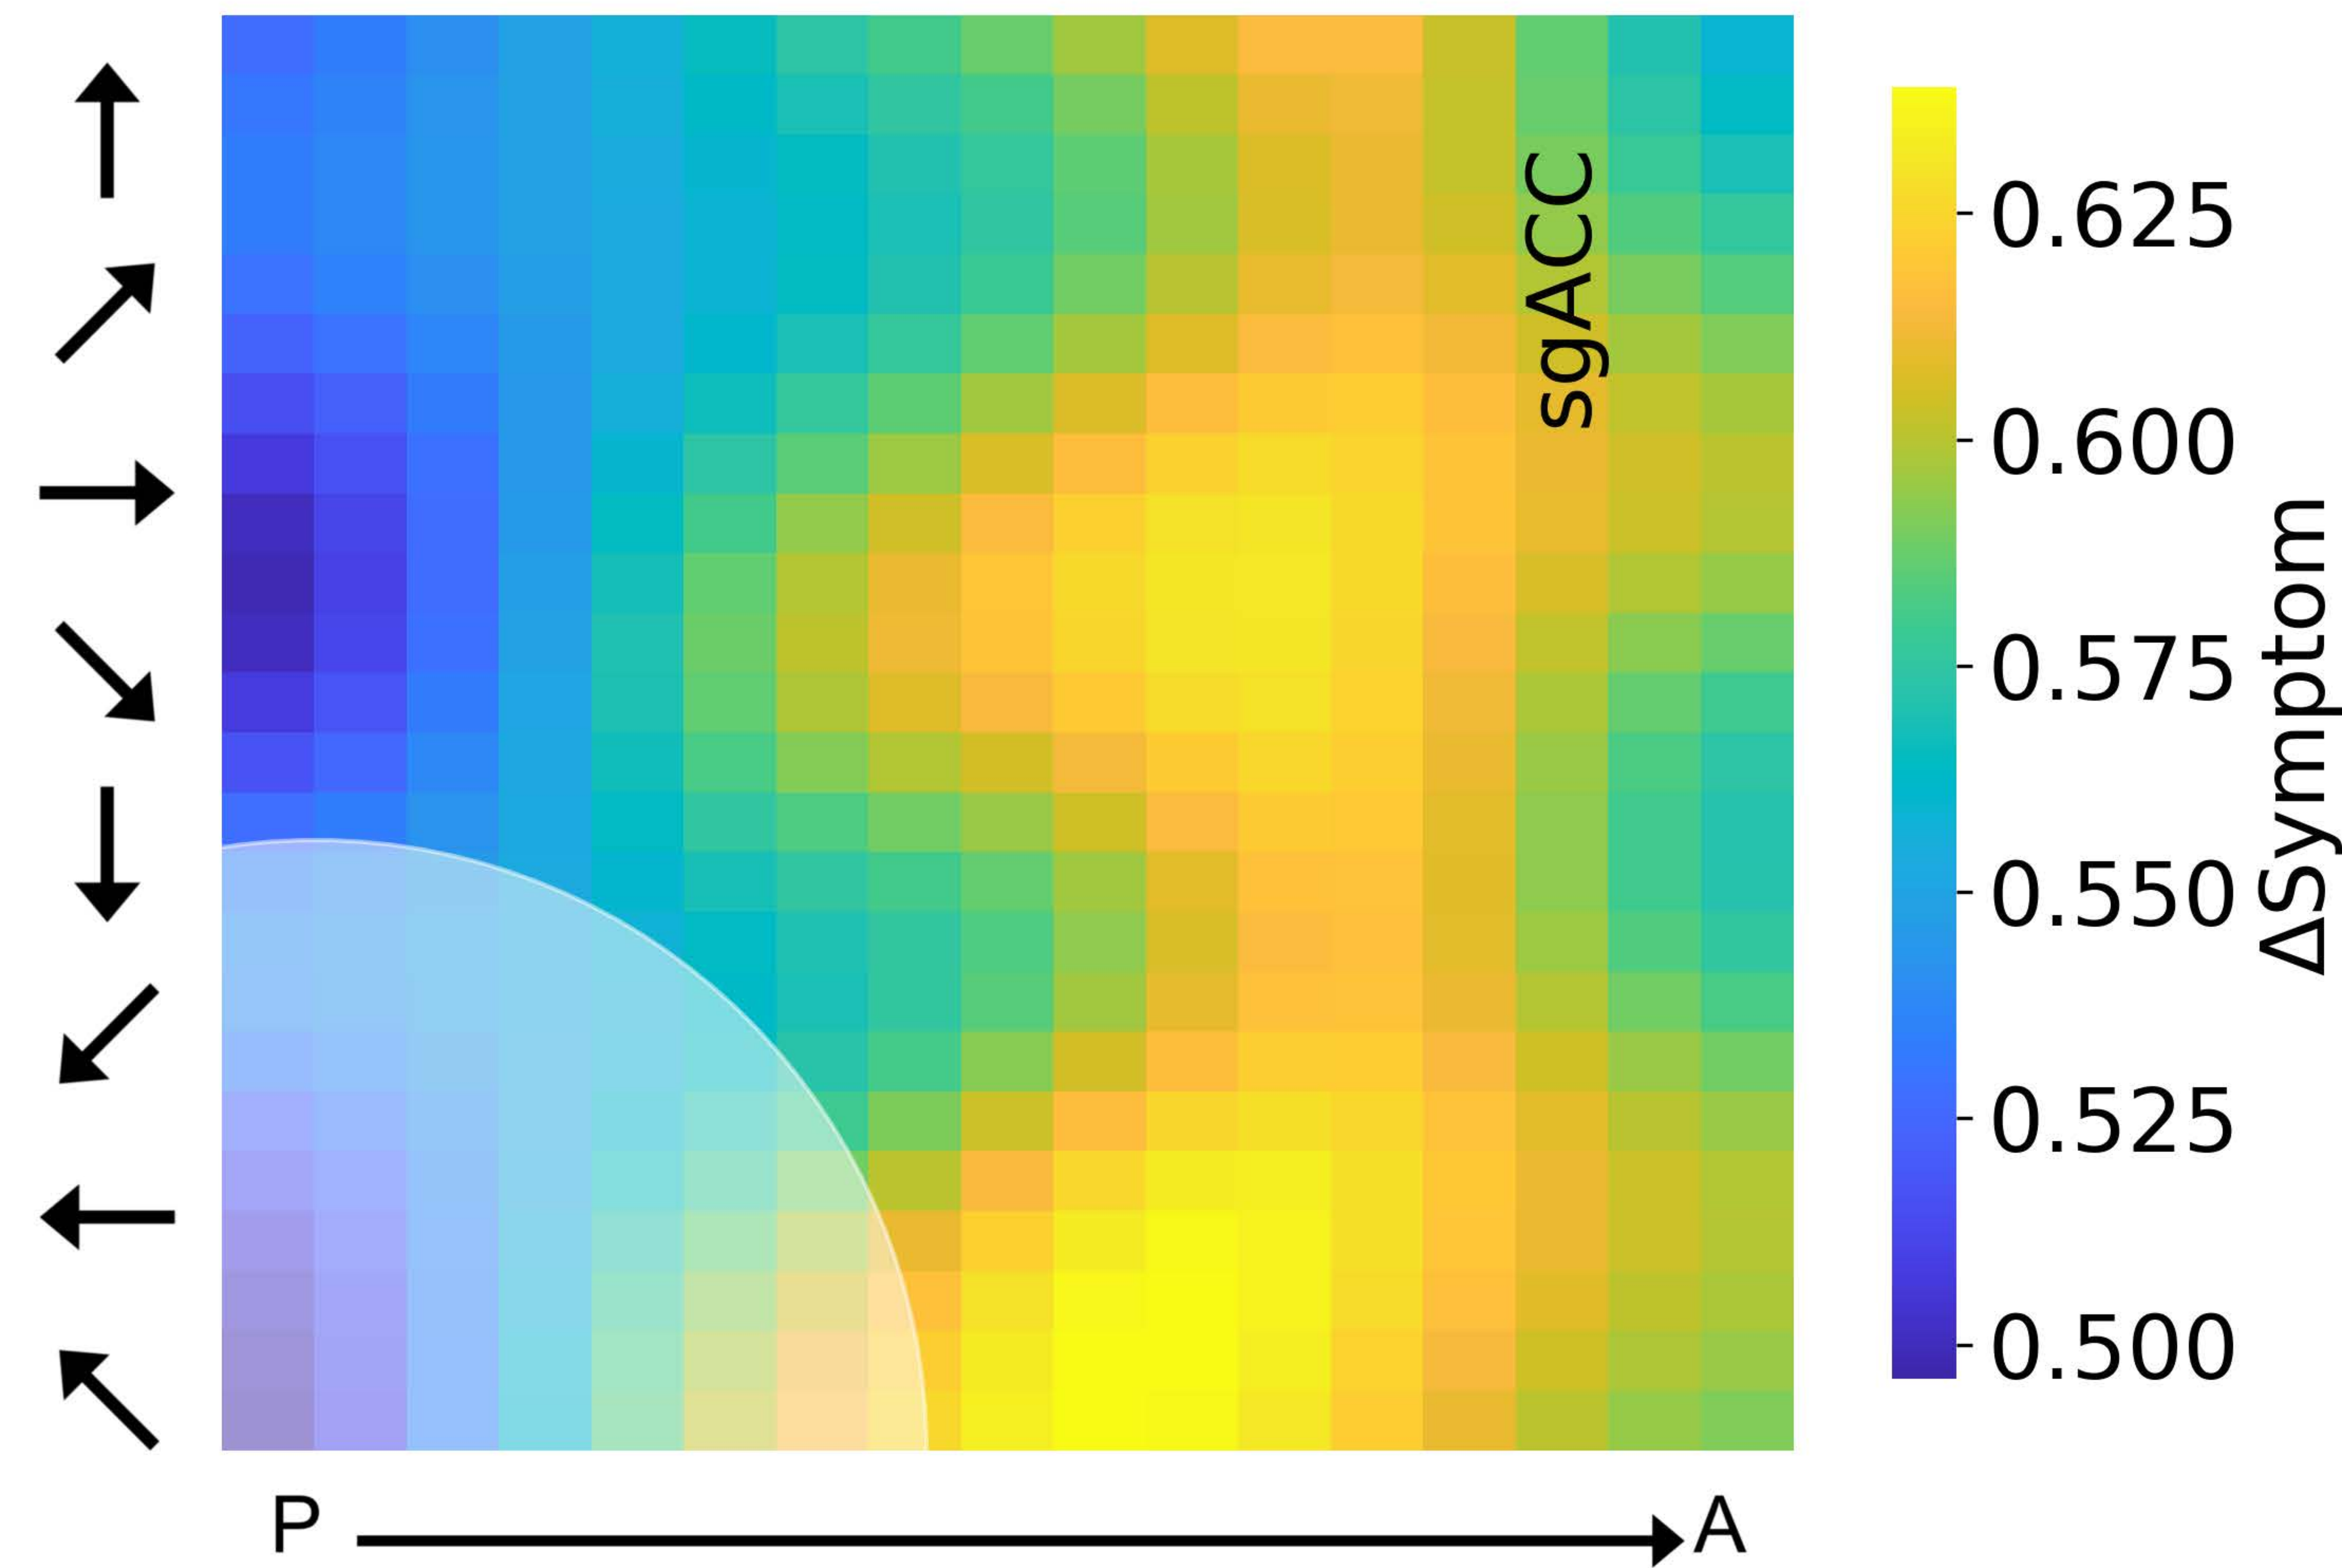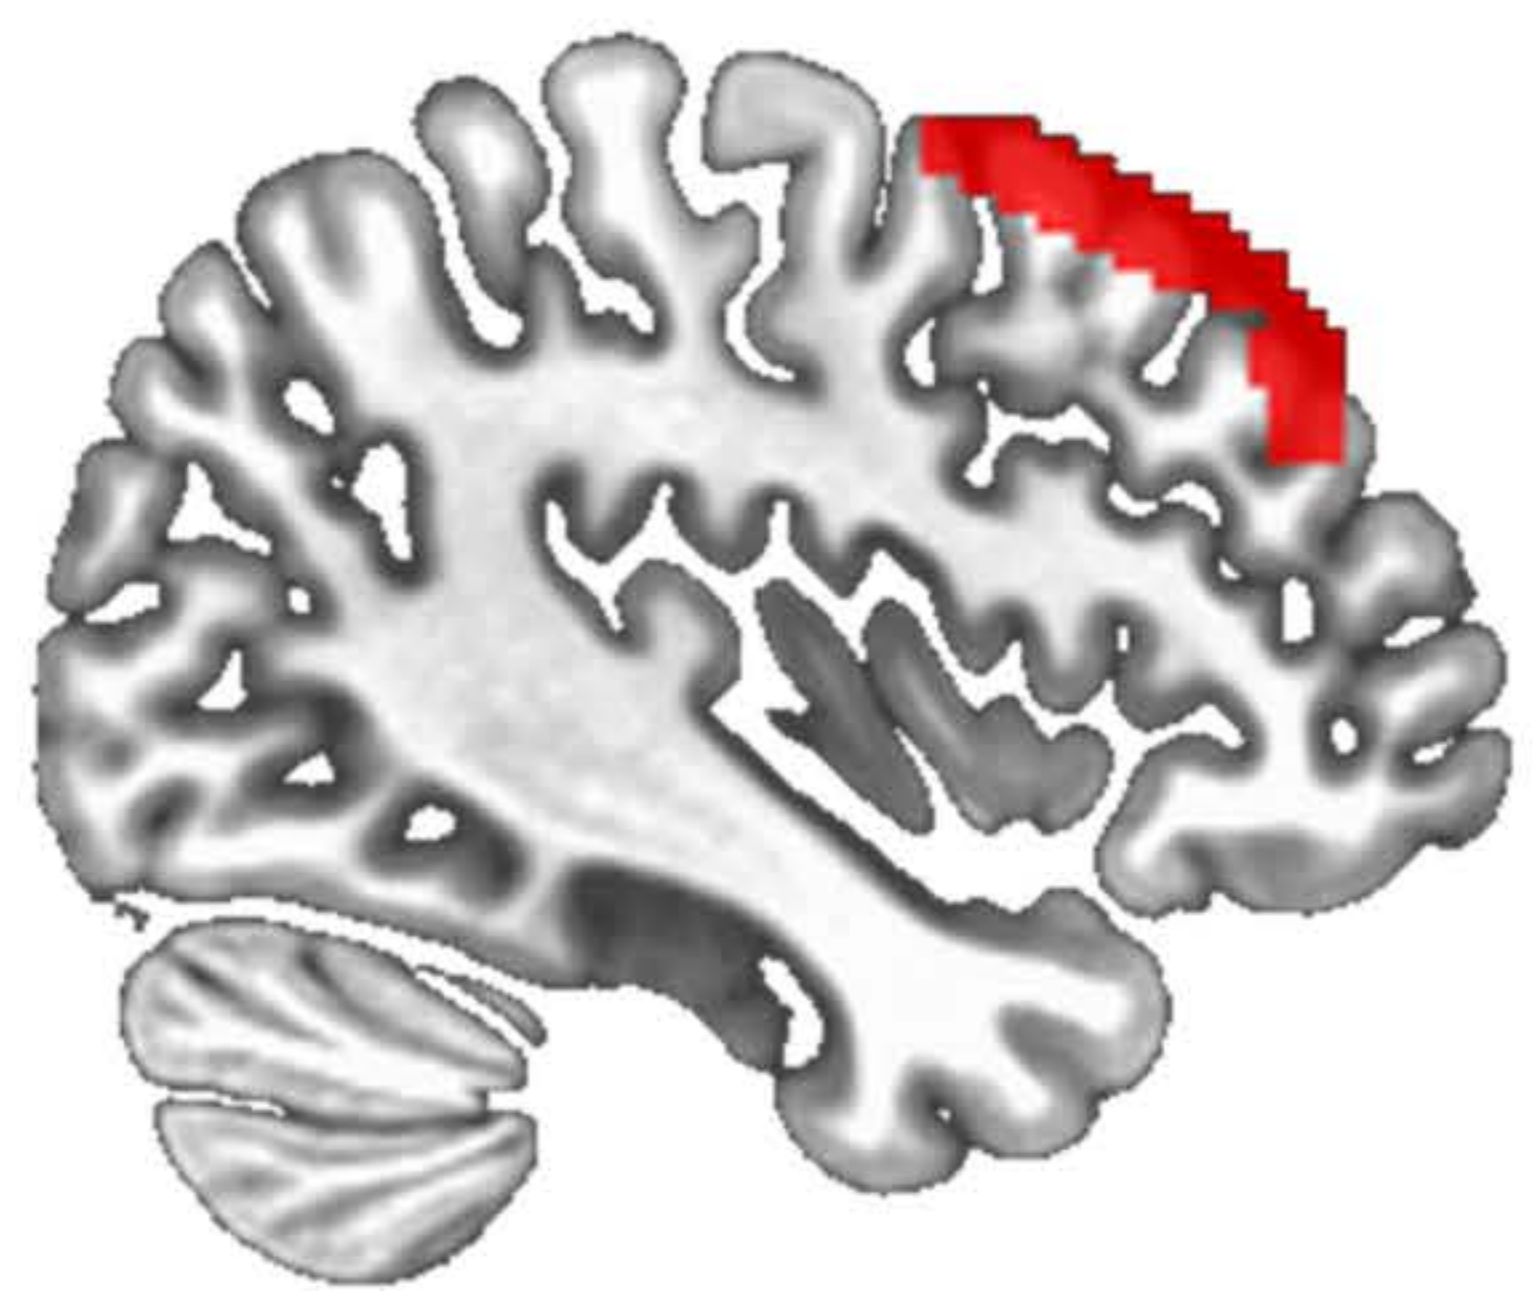



# NDARNJ618KZJ\_madrs\_left\_dlpfc

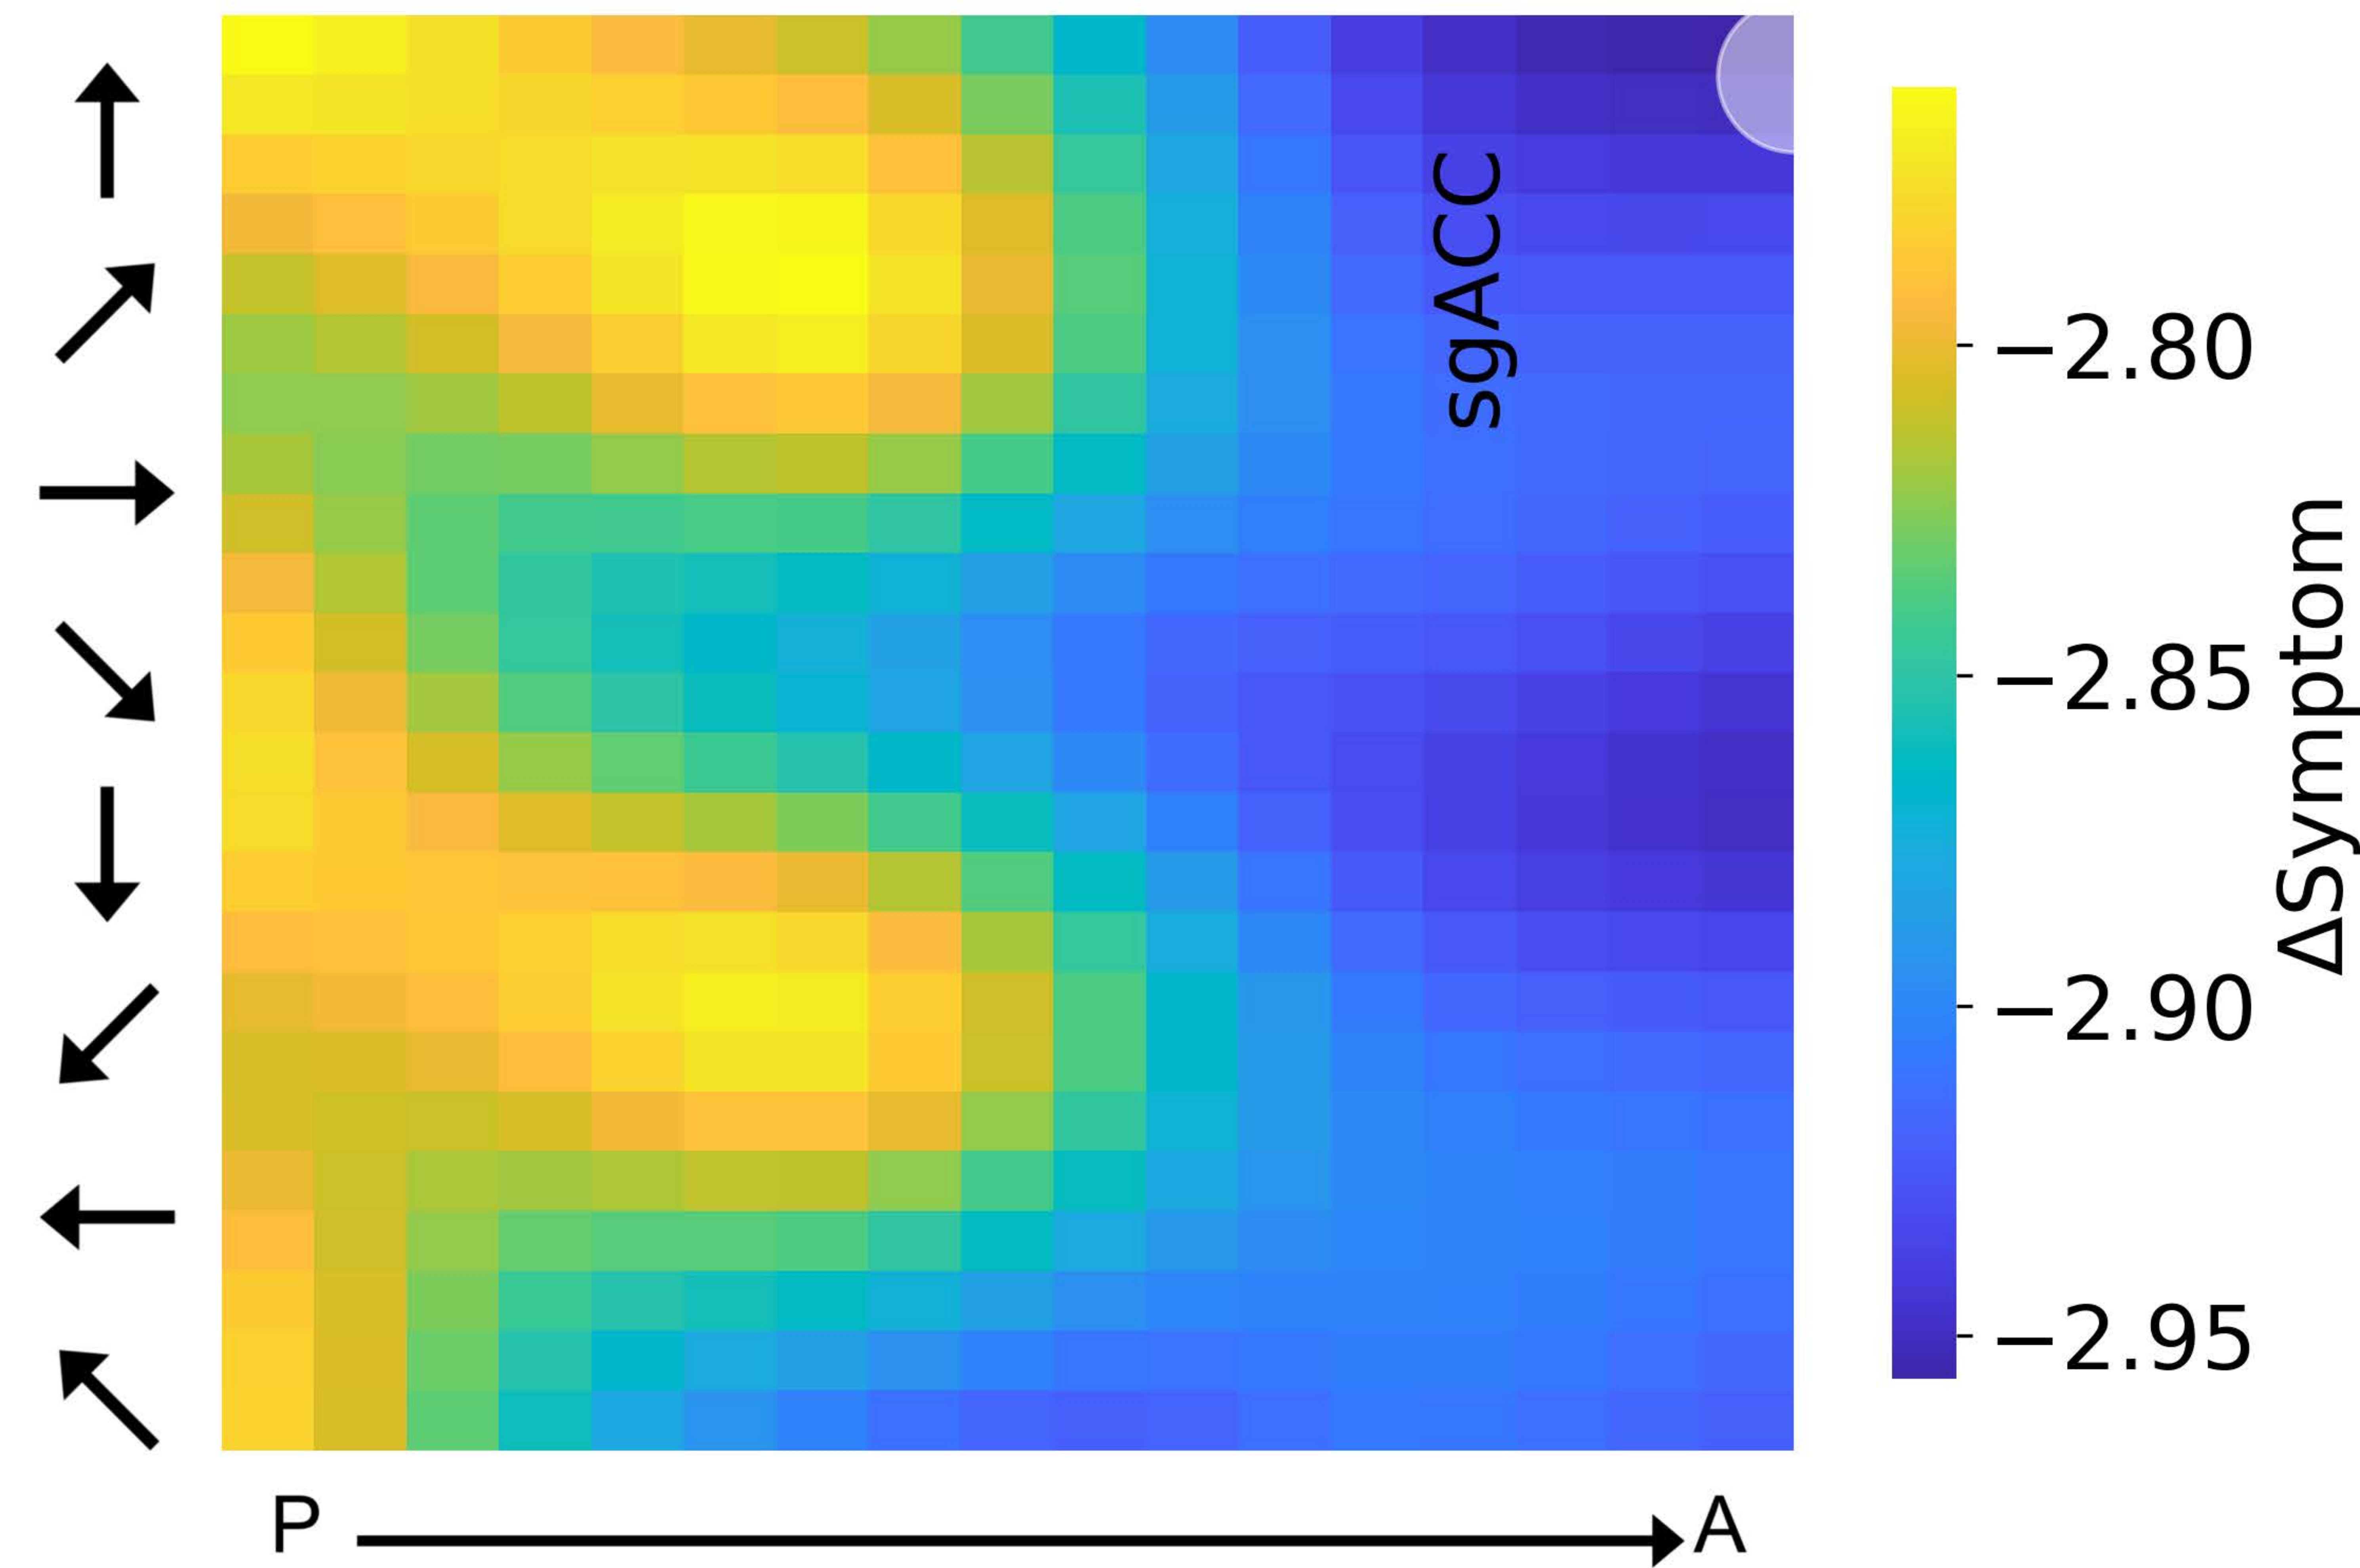



# INDARNL715RTY\_madrs\_left\_dlpfc

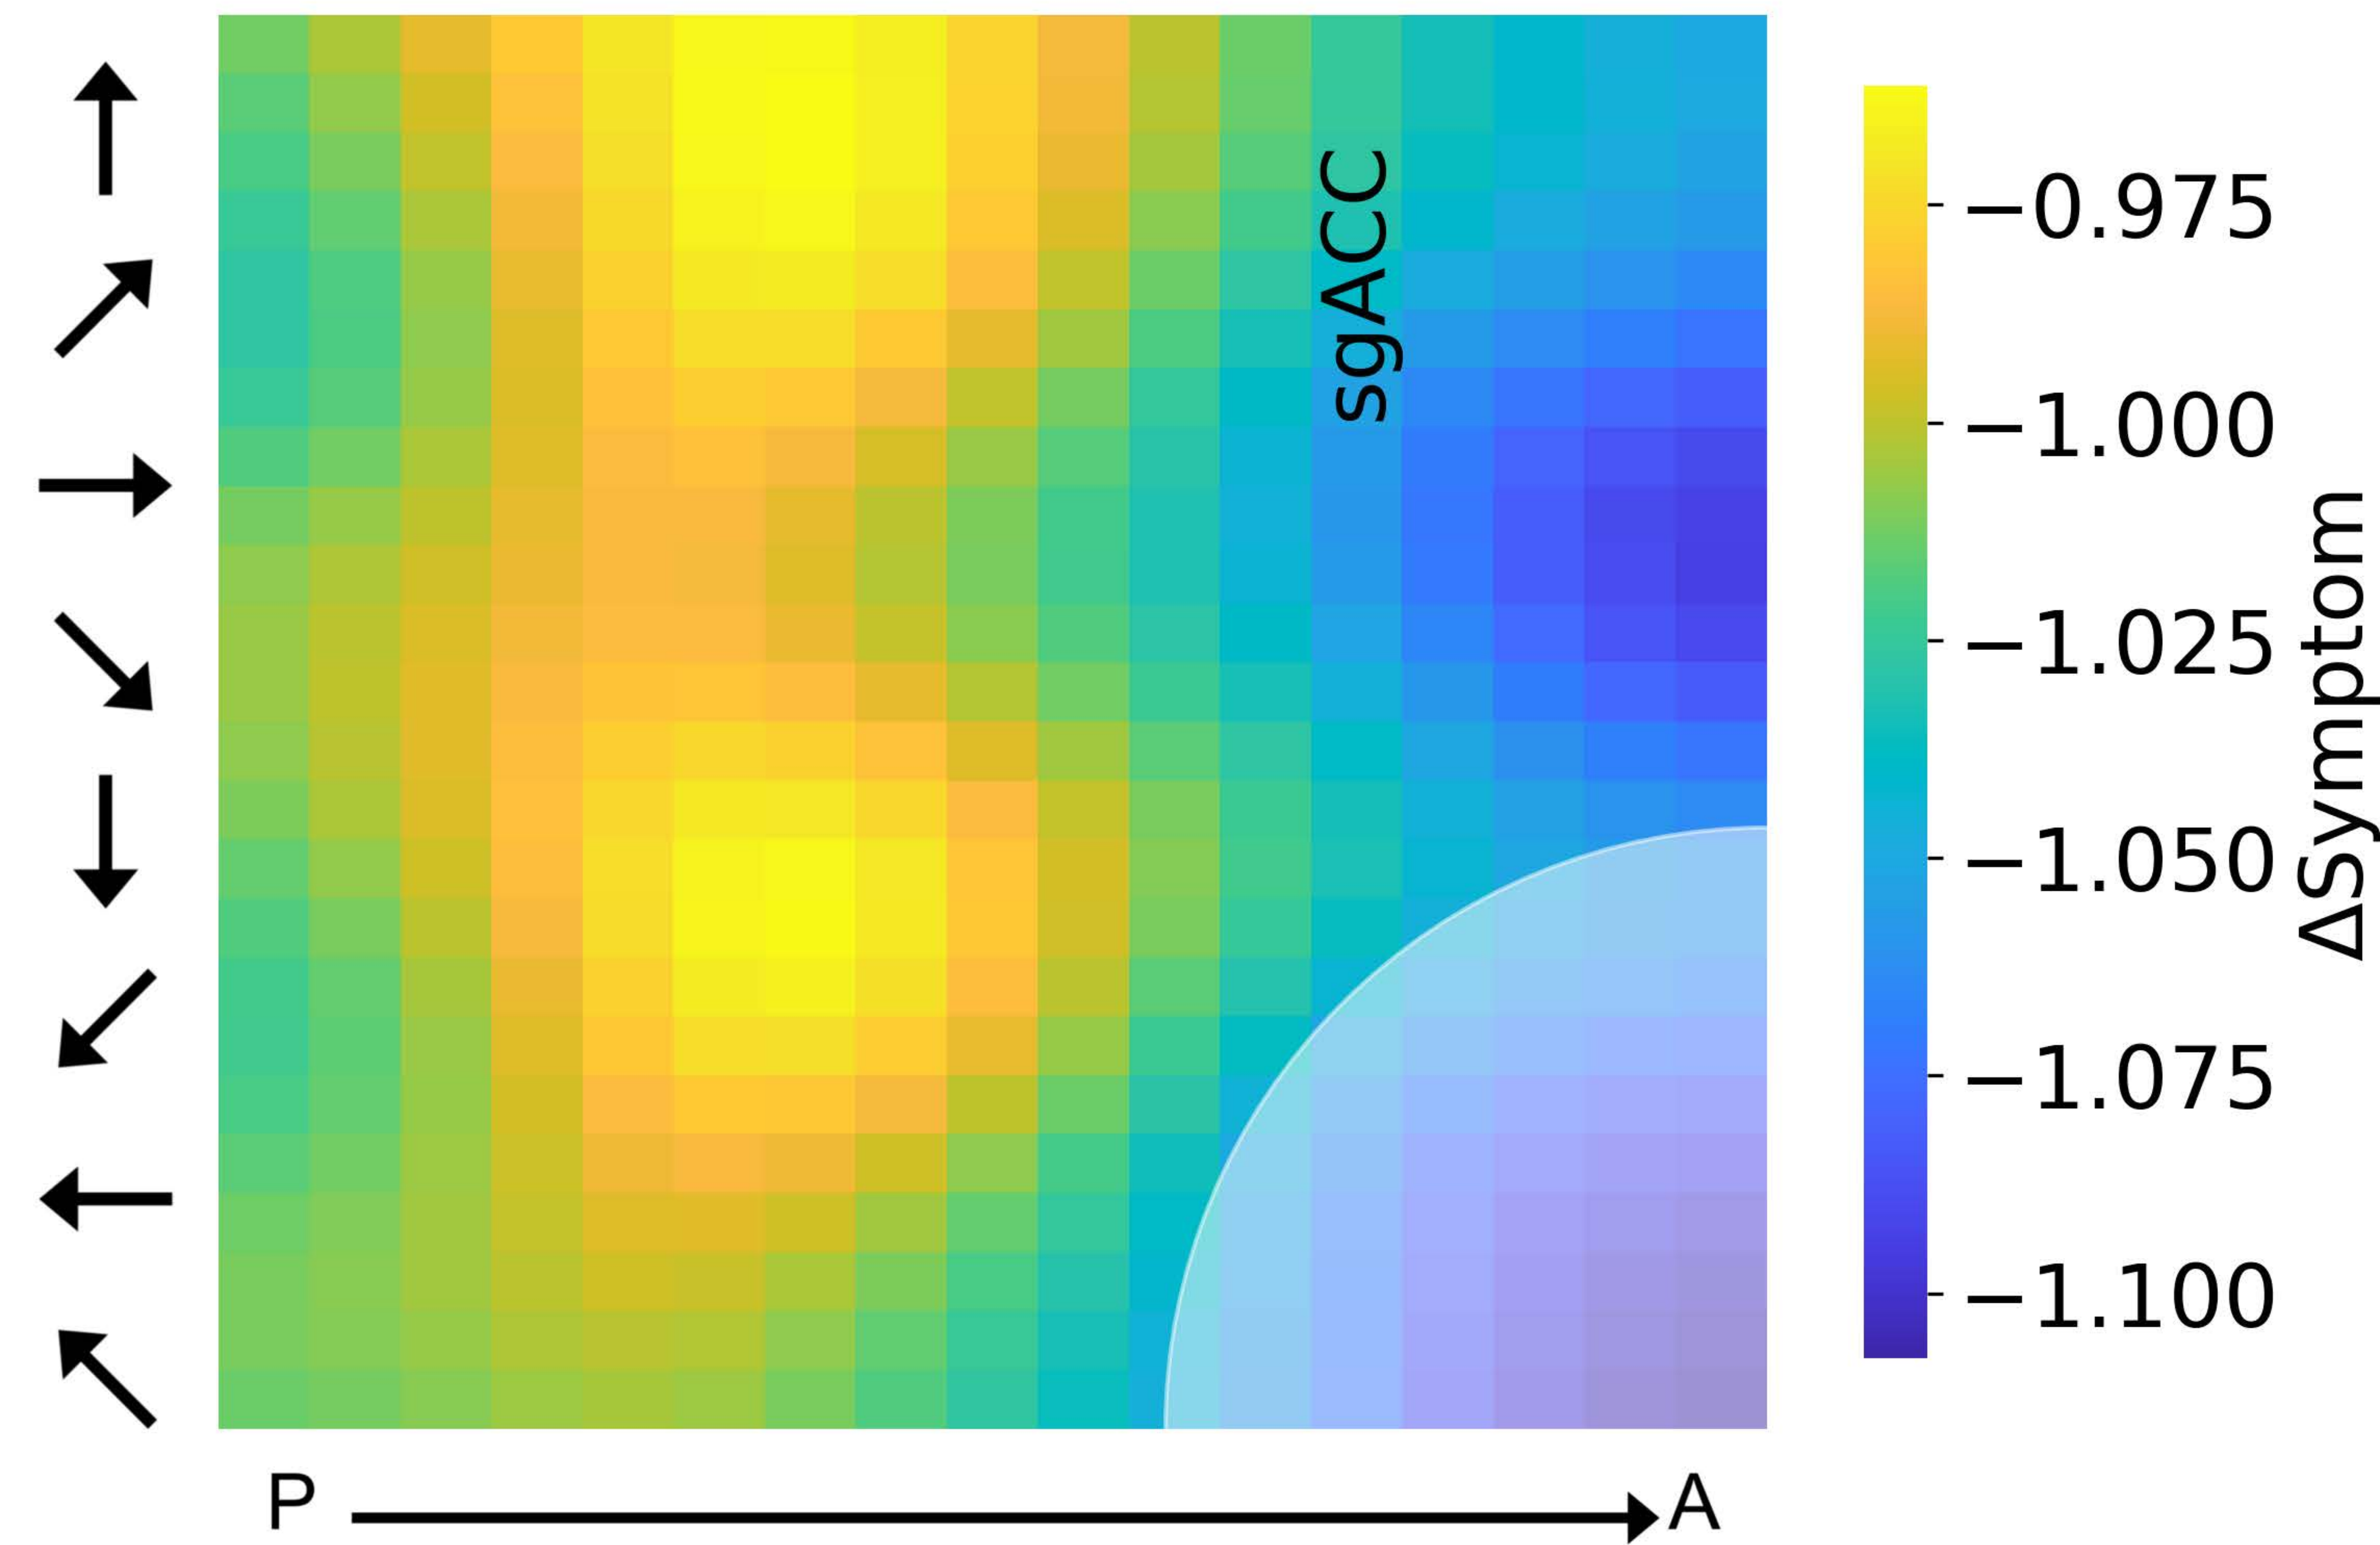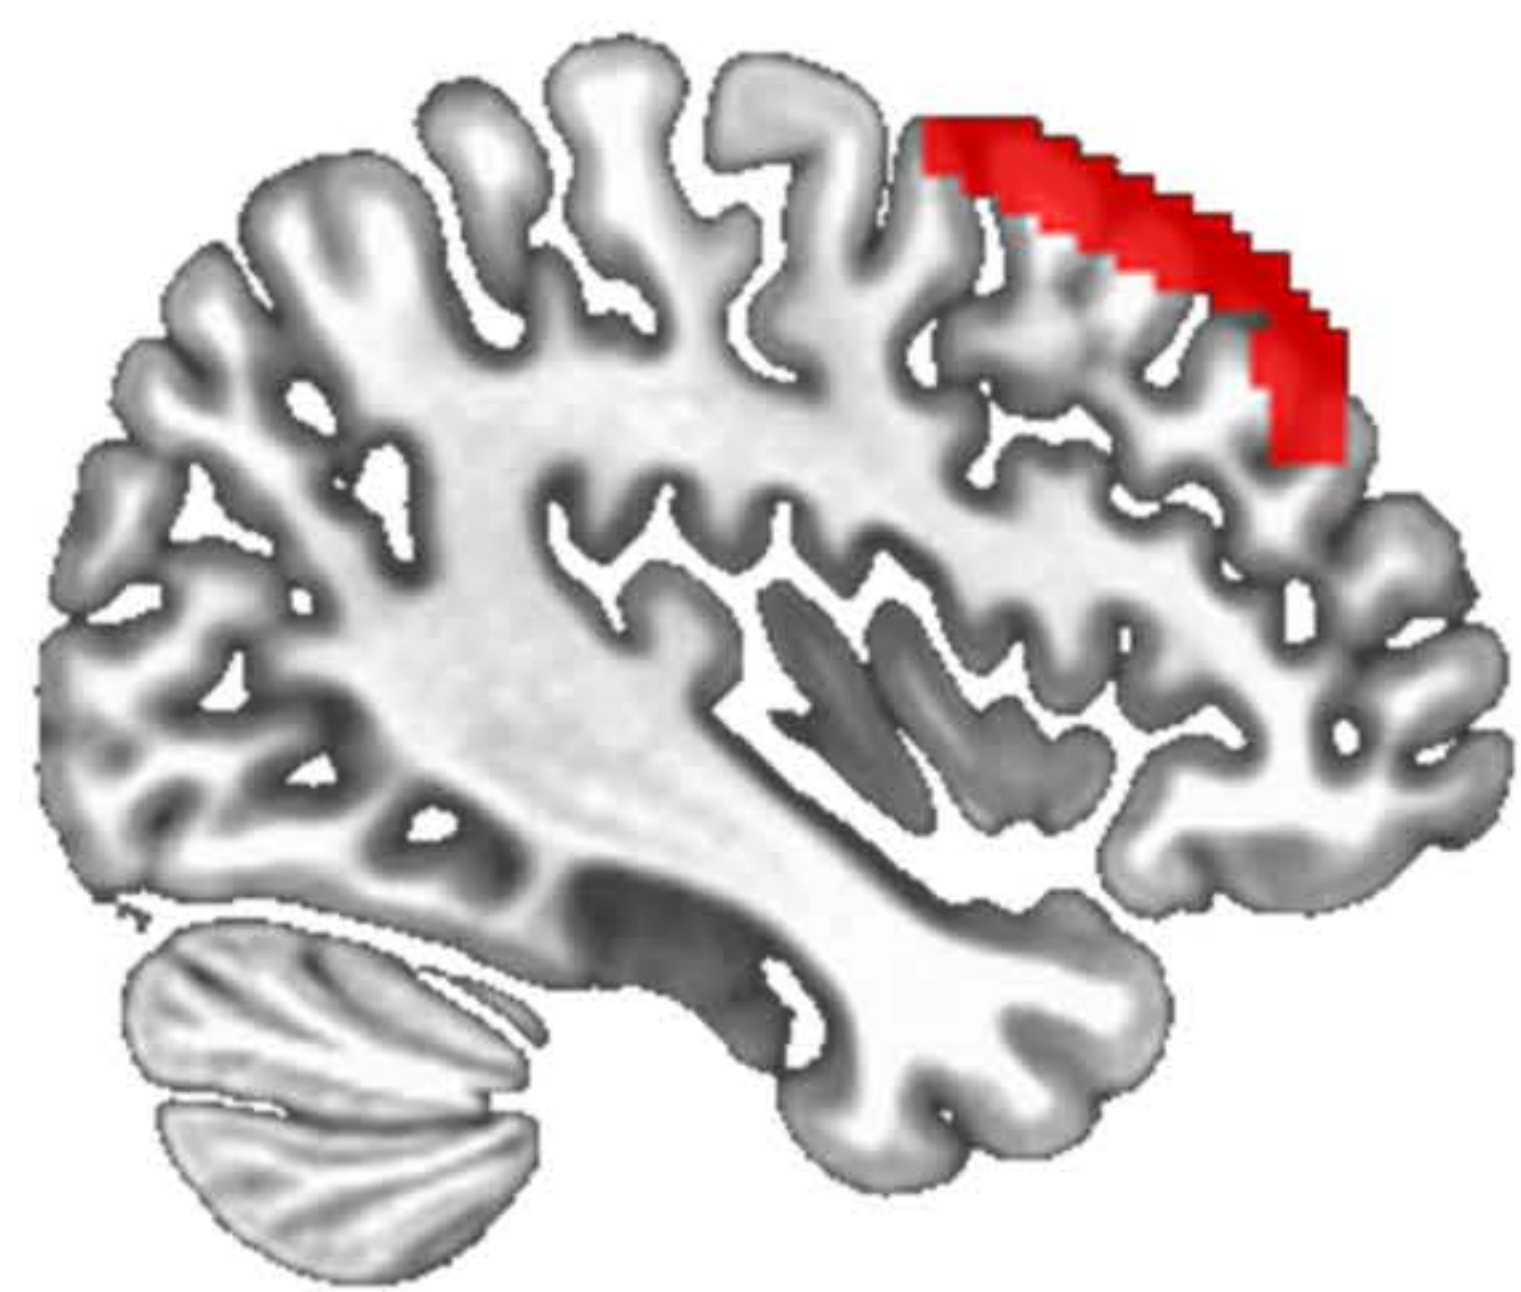



# NDARPK532CVC\_madr\_left\_dlpfc

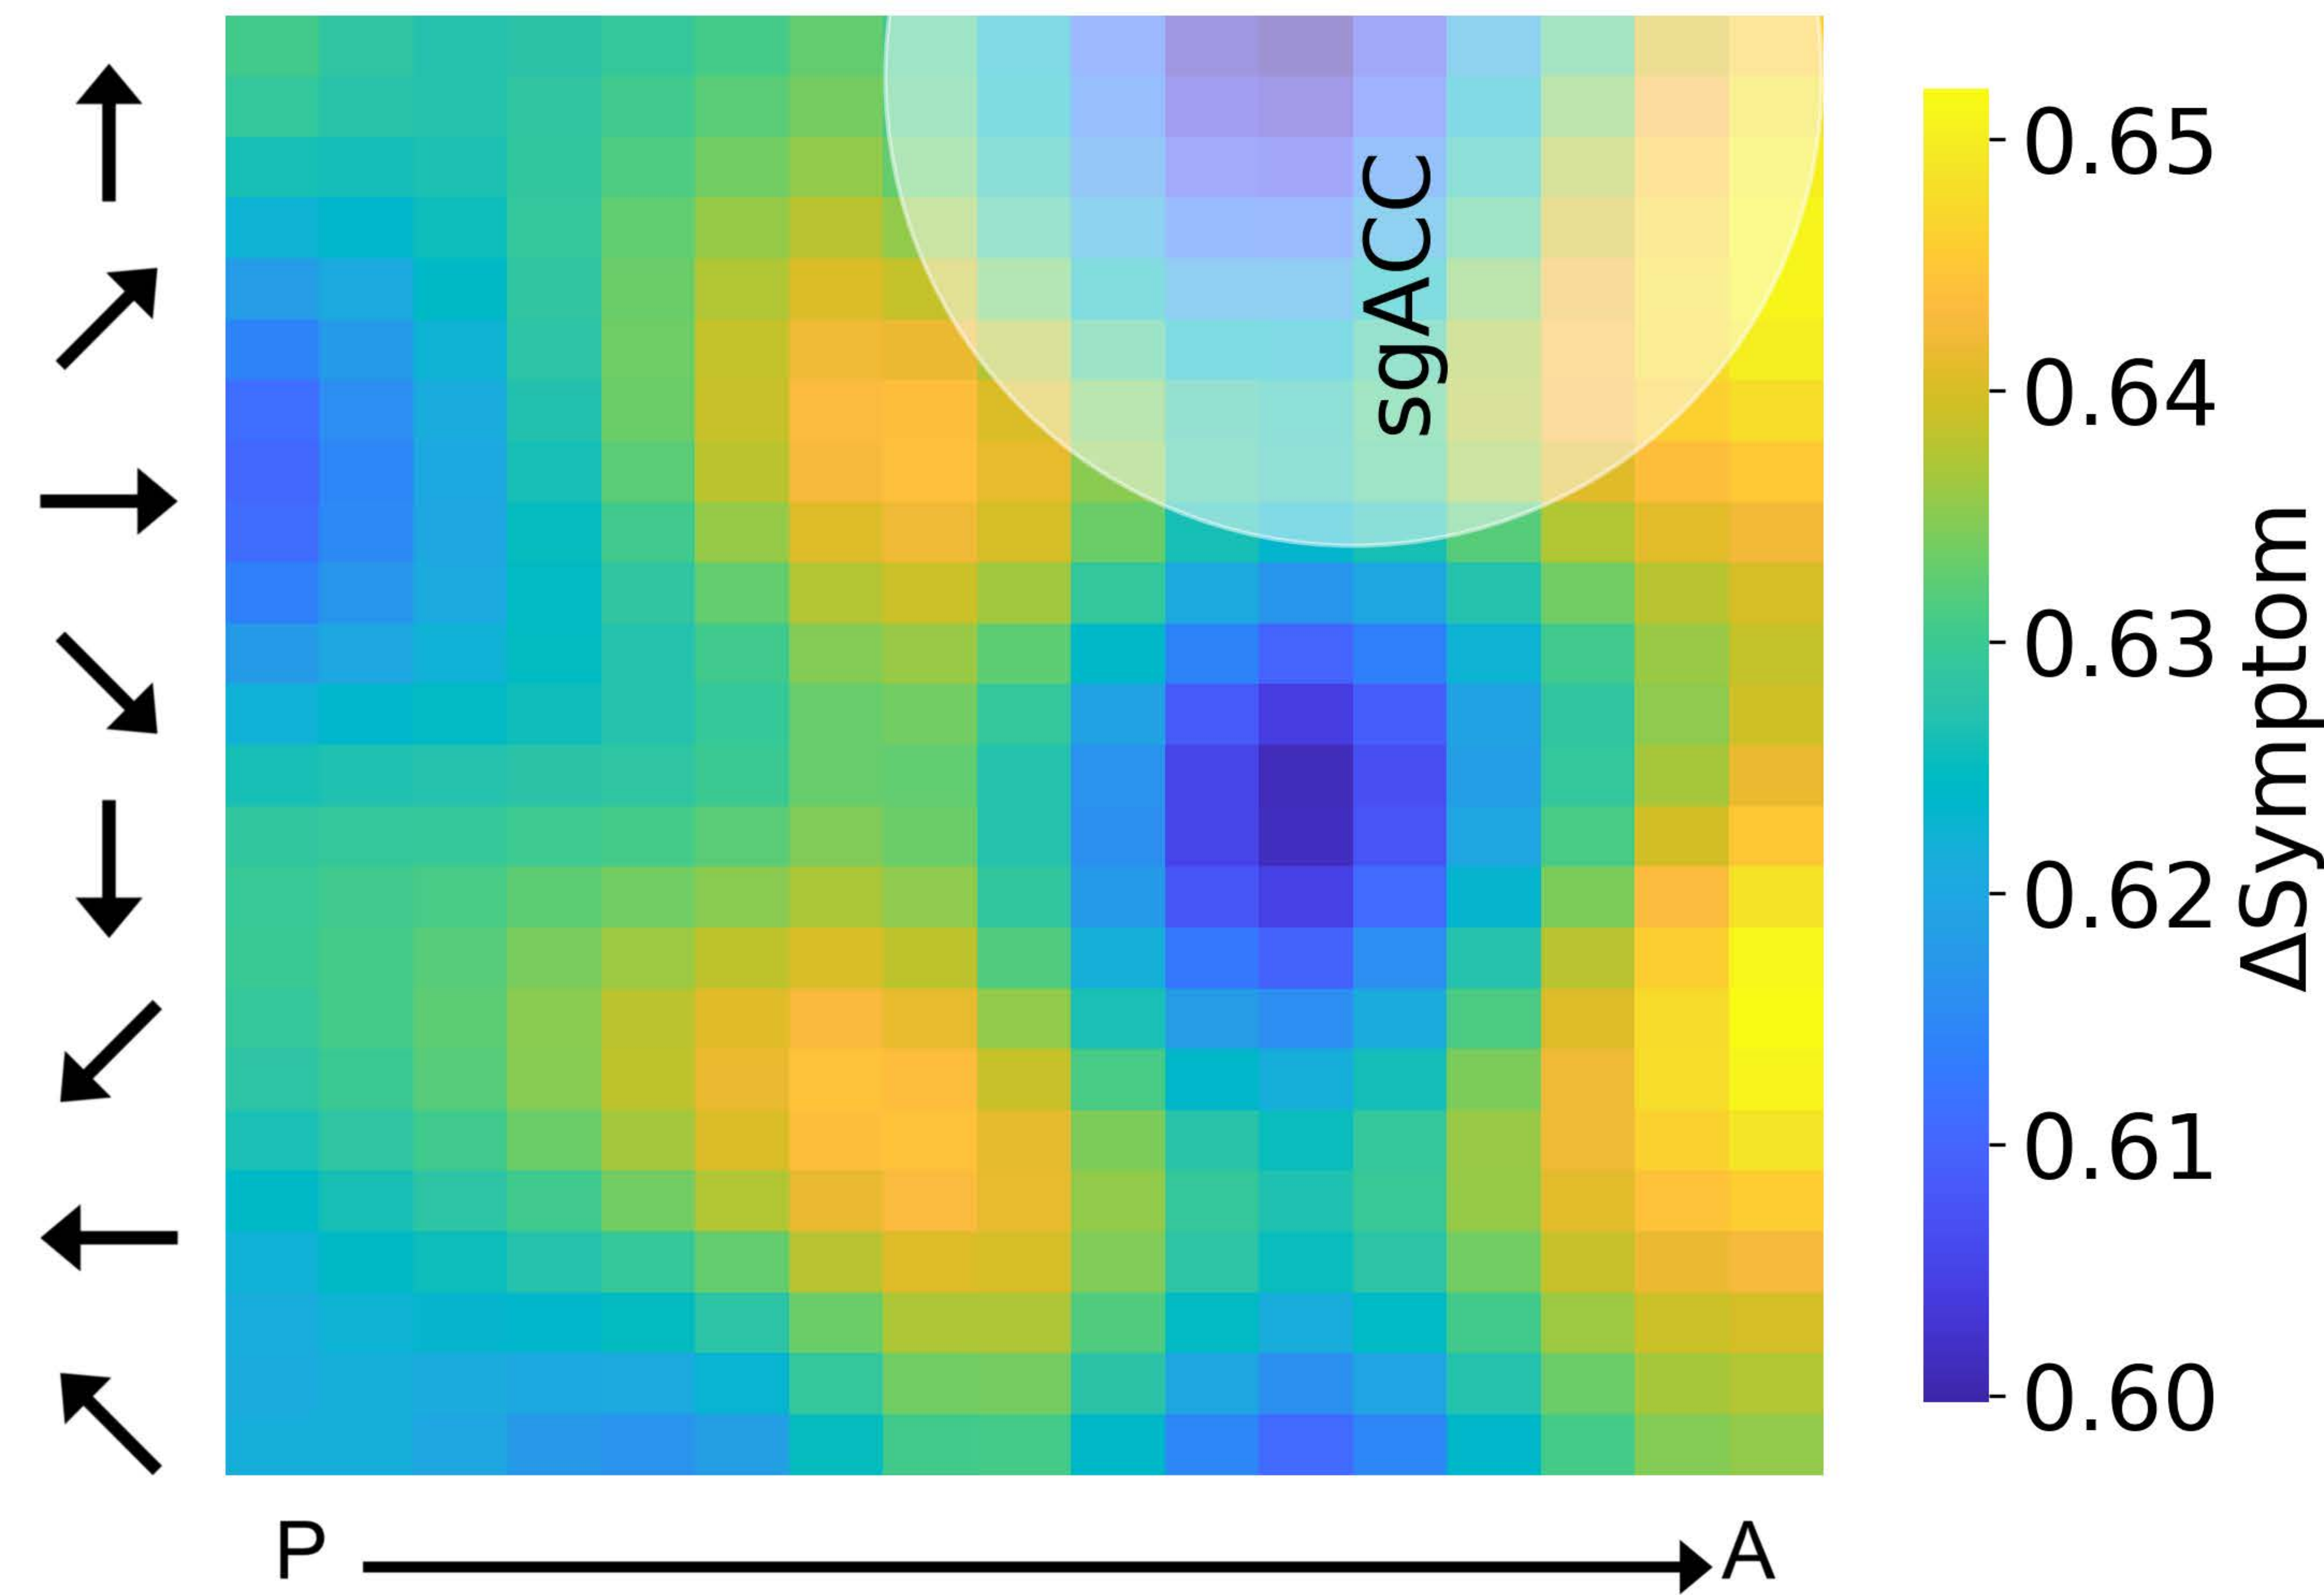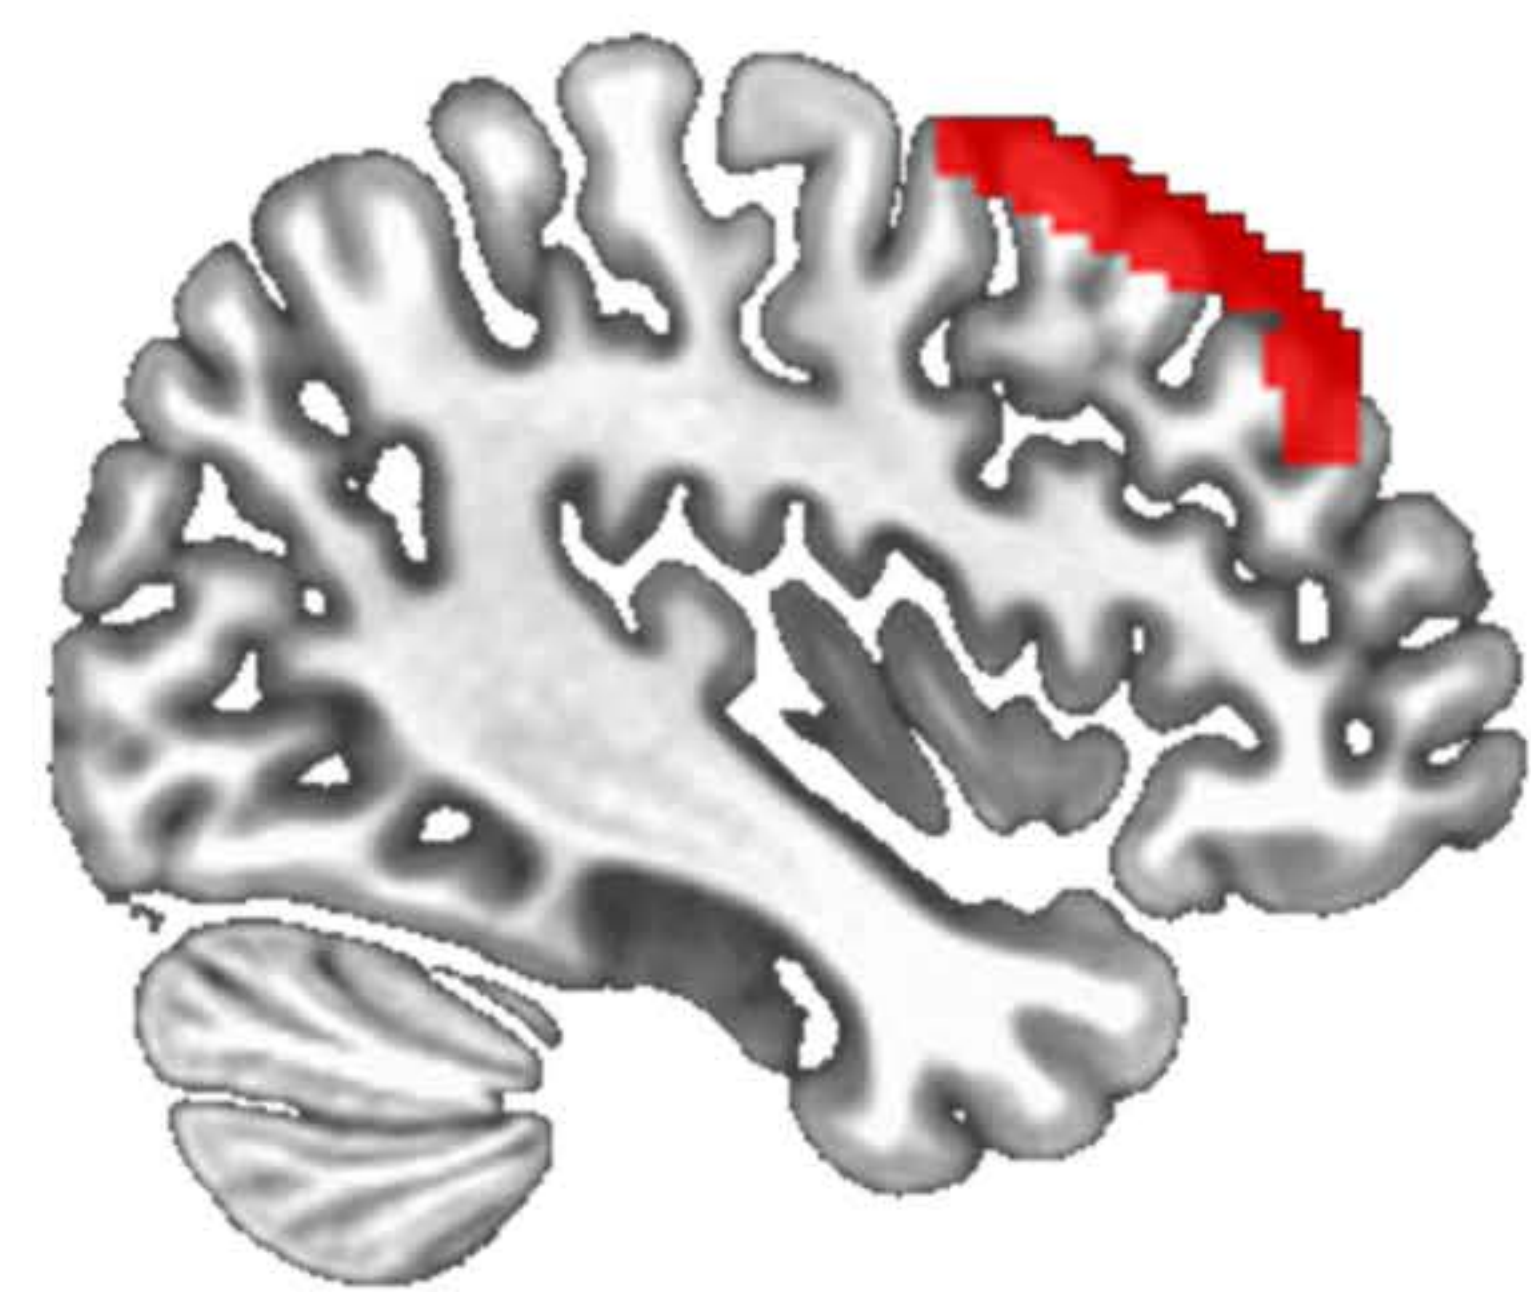



# NDARWK858FA2\_madrs\_left\_dlpfc

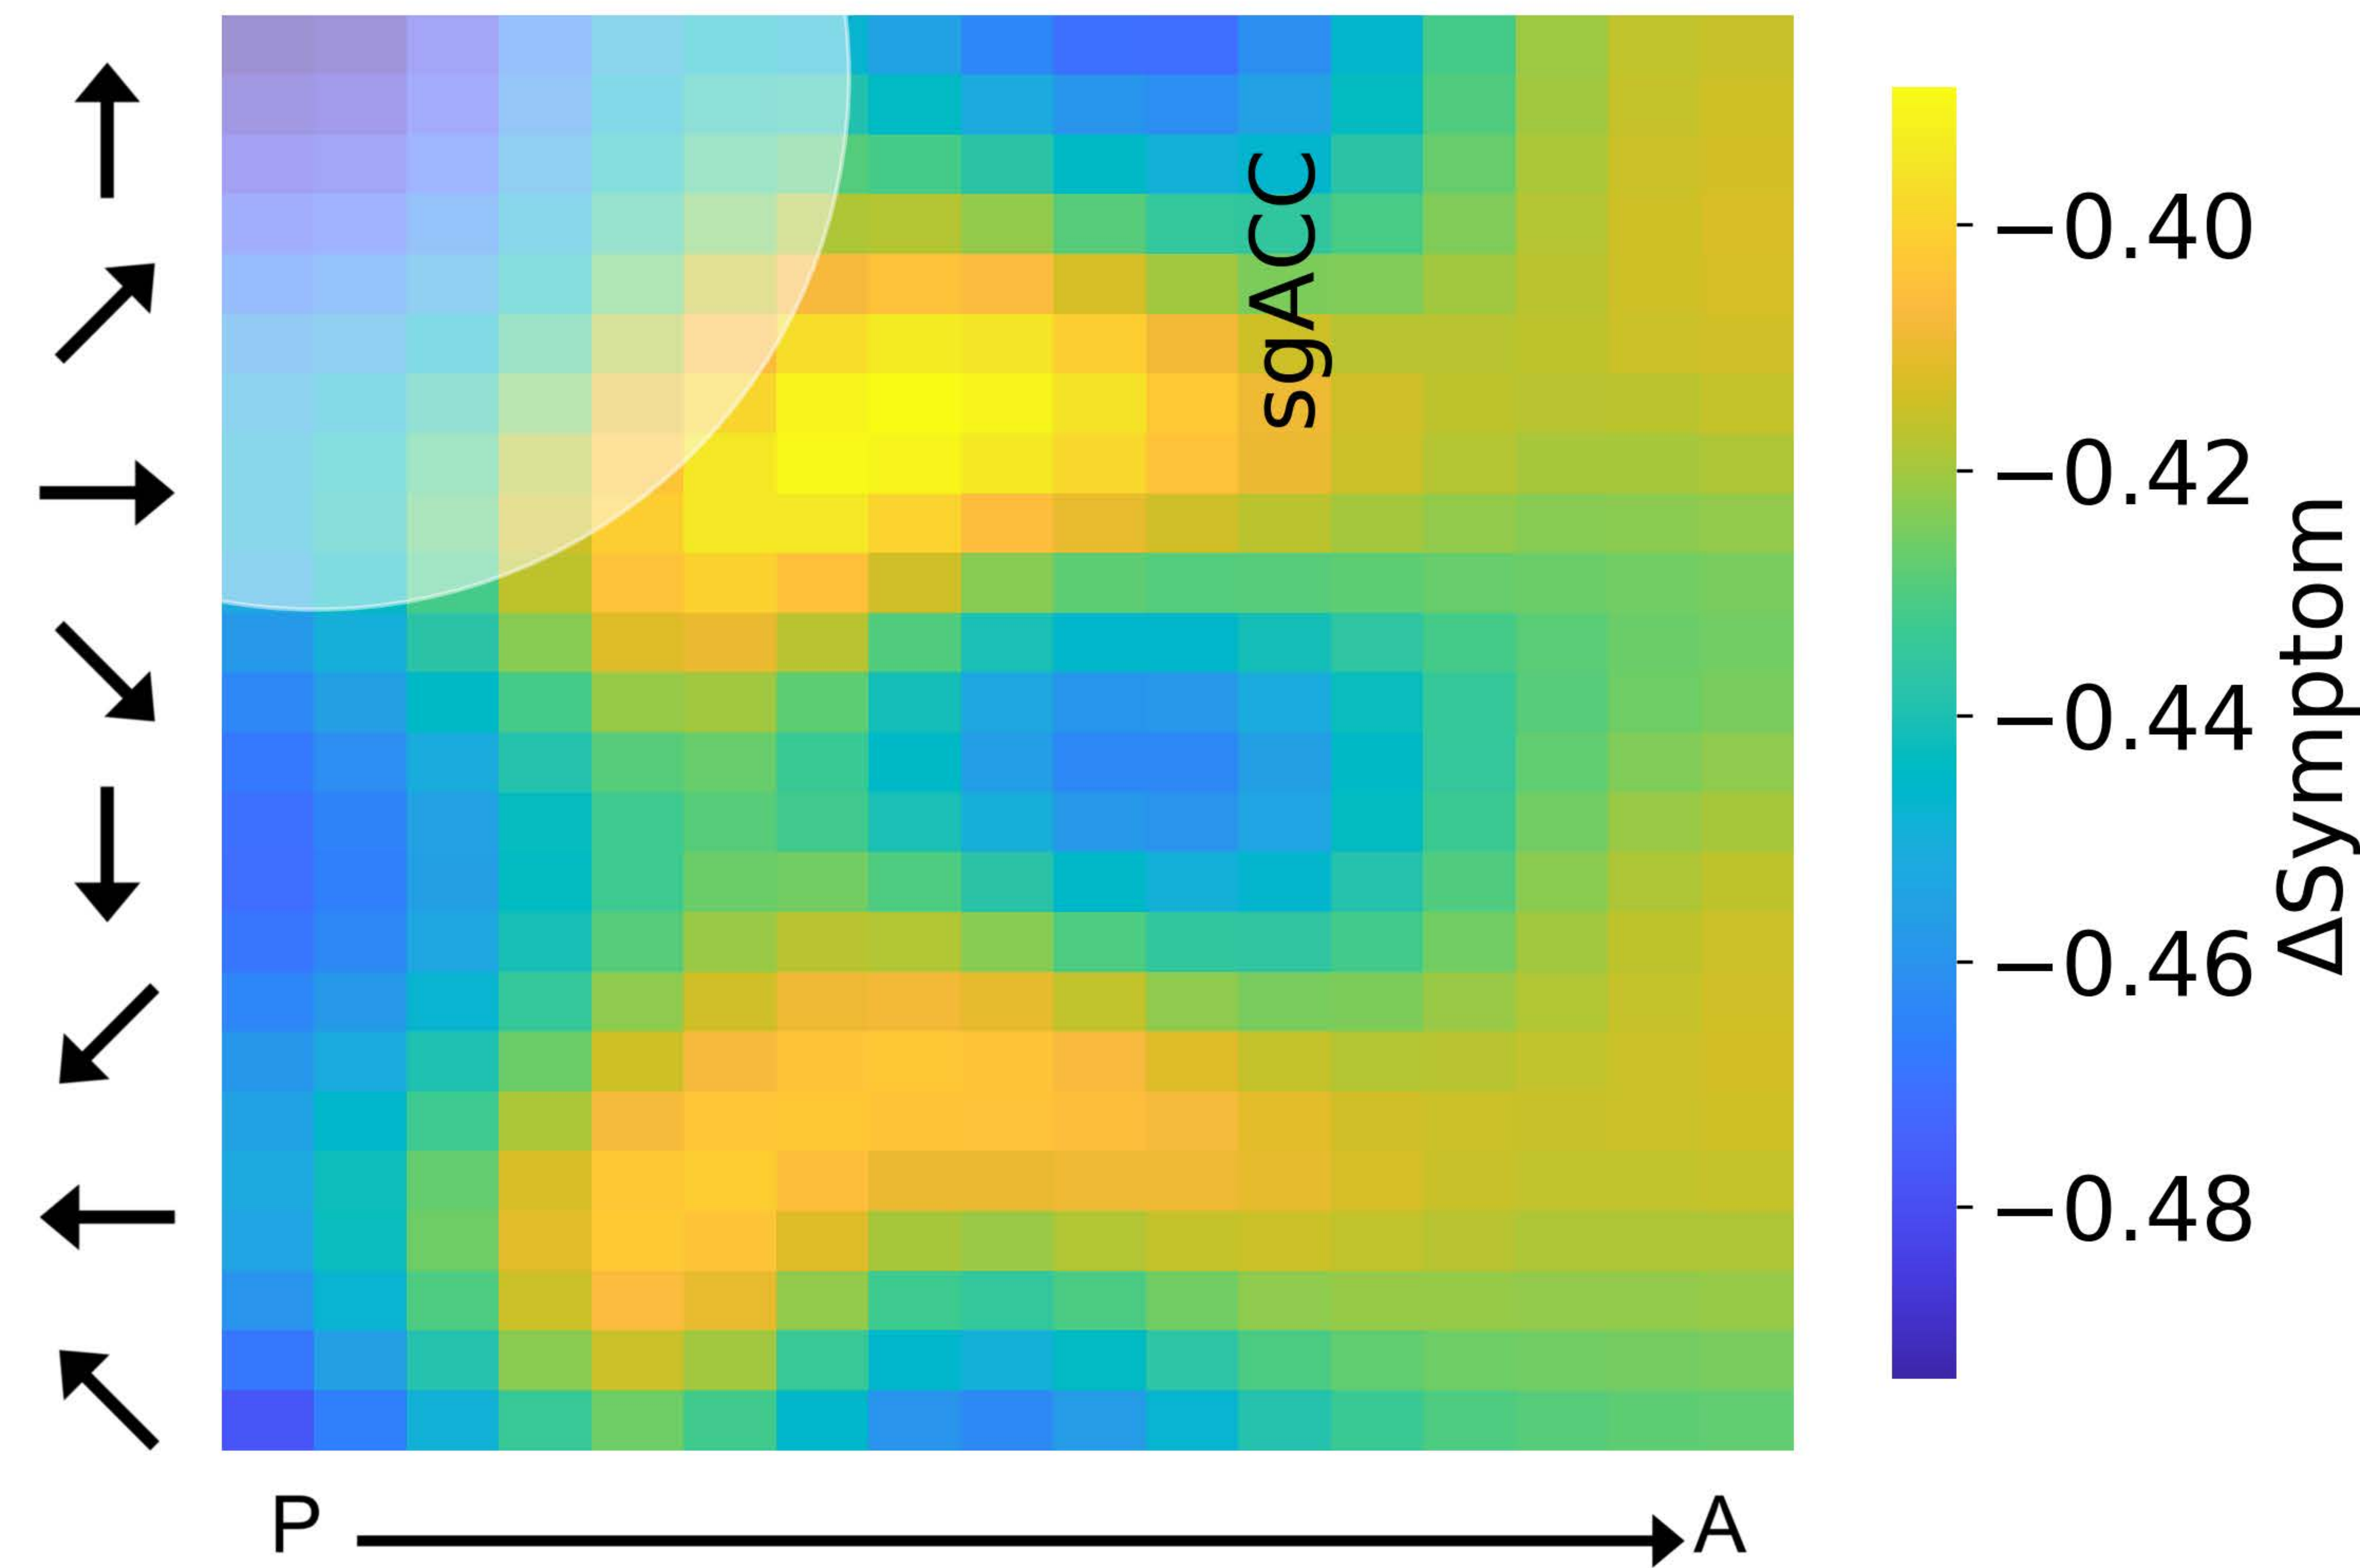



# INDARWMM071DRZ\_madrs\_left\_dlpfc

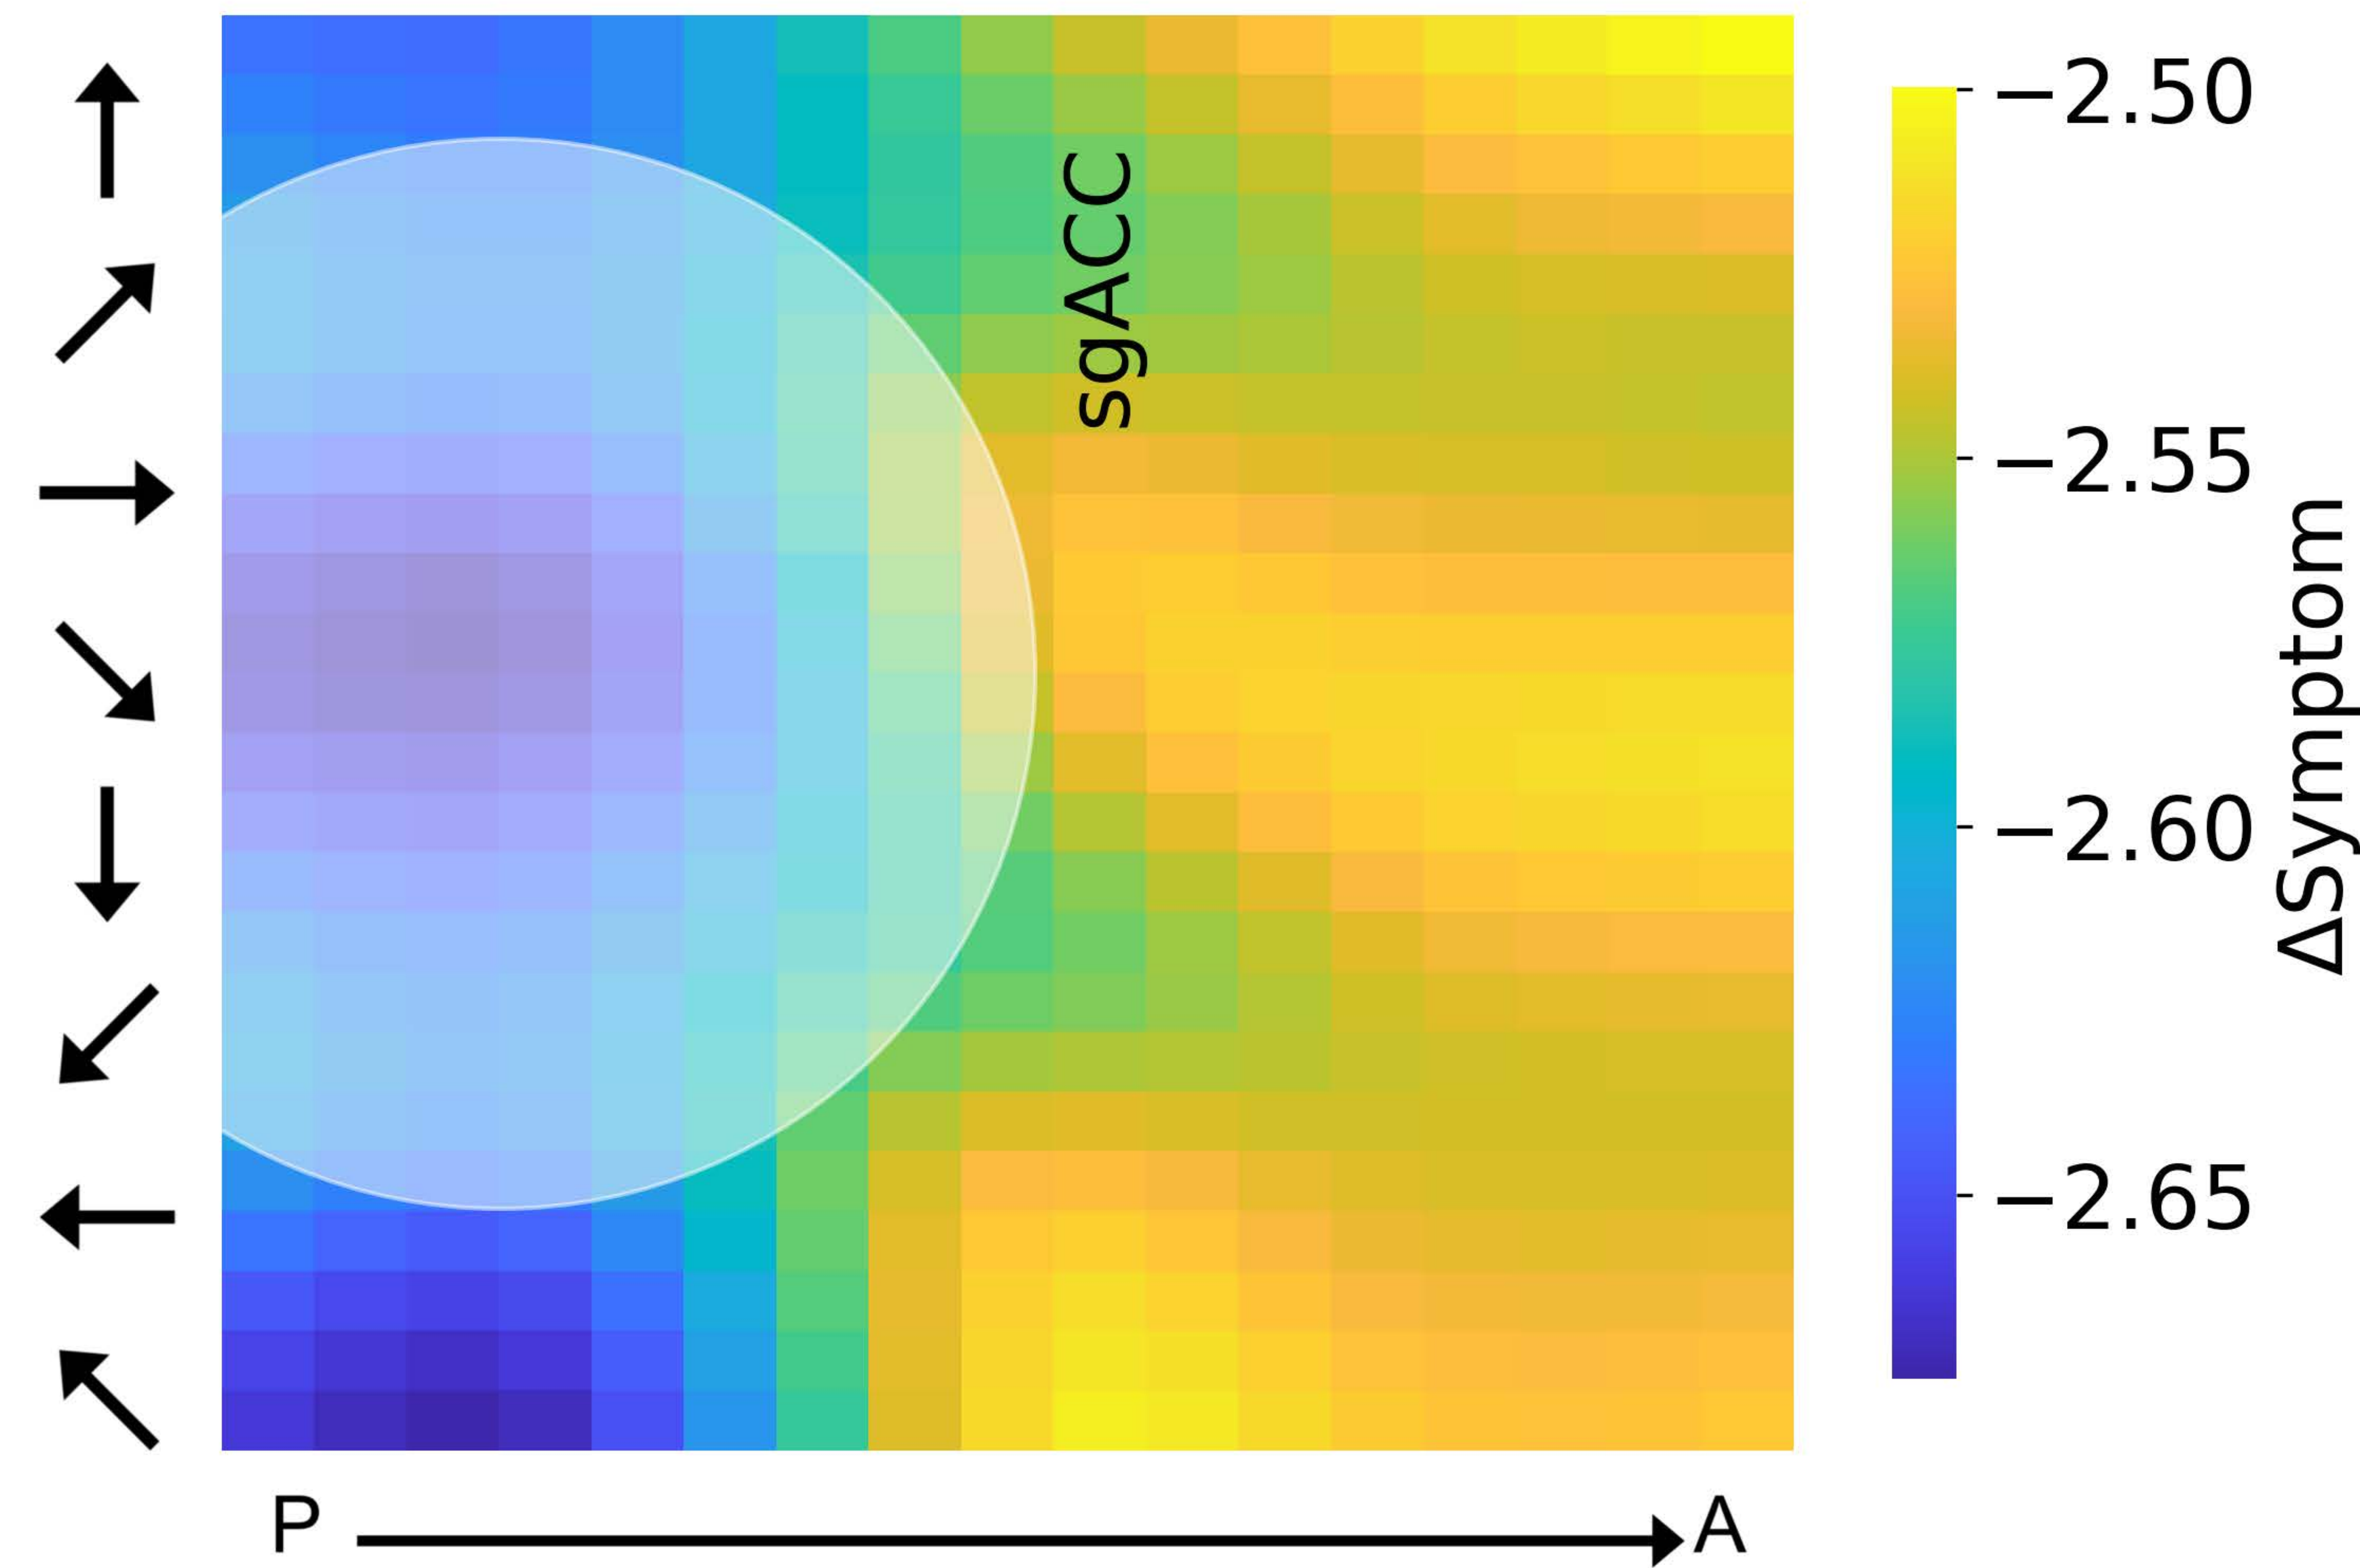



# INDARWT226PU5\_madrs\_left\_dlpfc

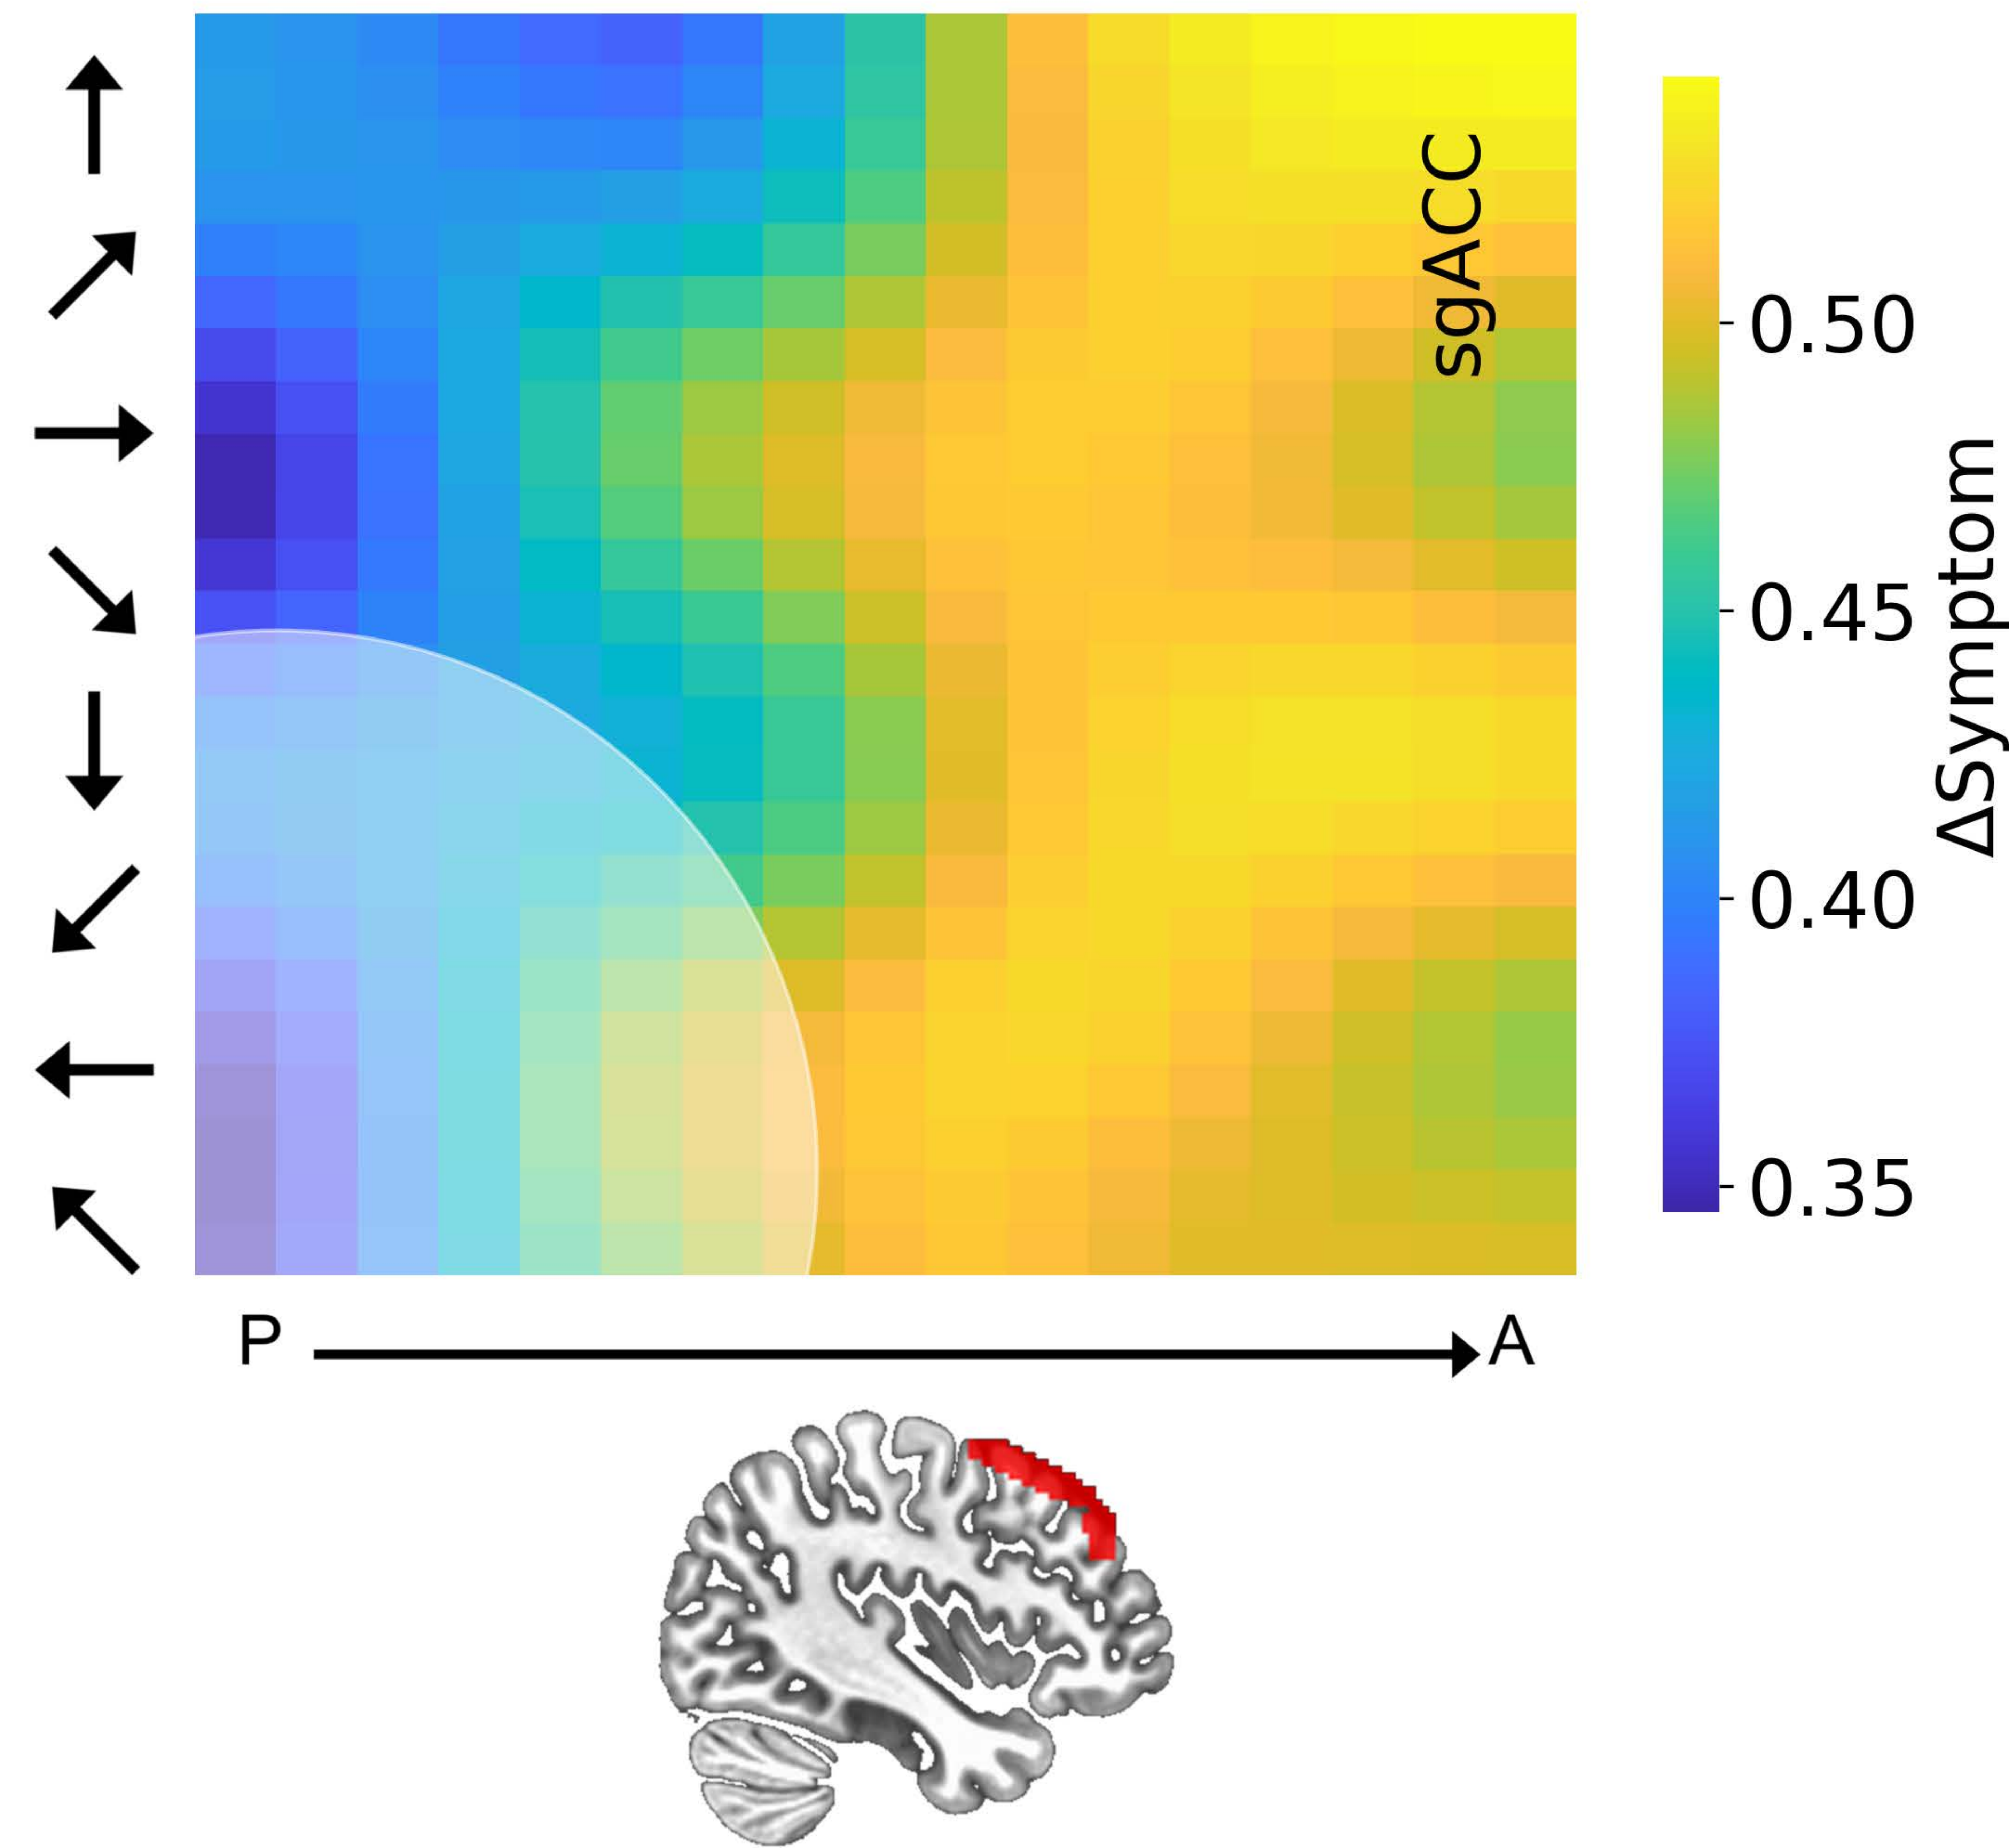



# INDARWU139LAY\_madr\_left\_dlpfc

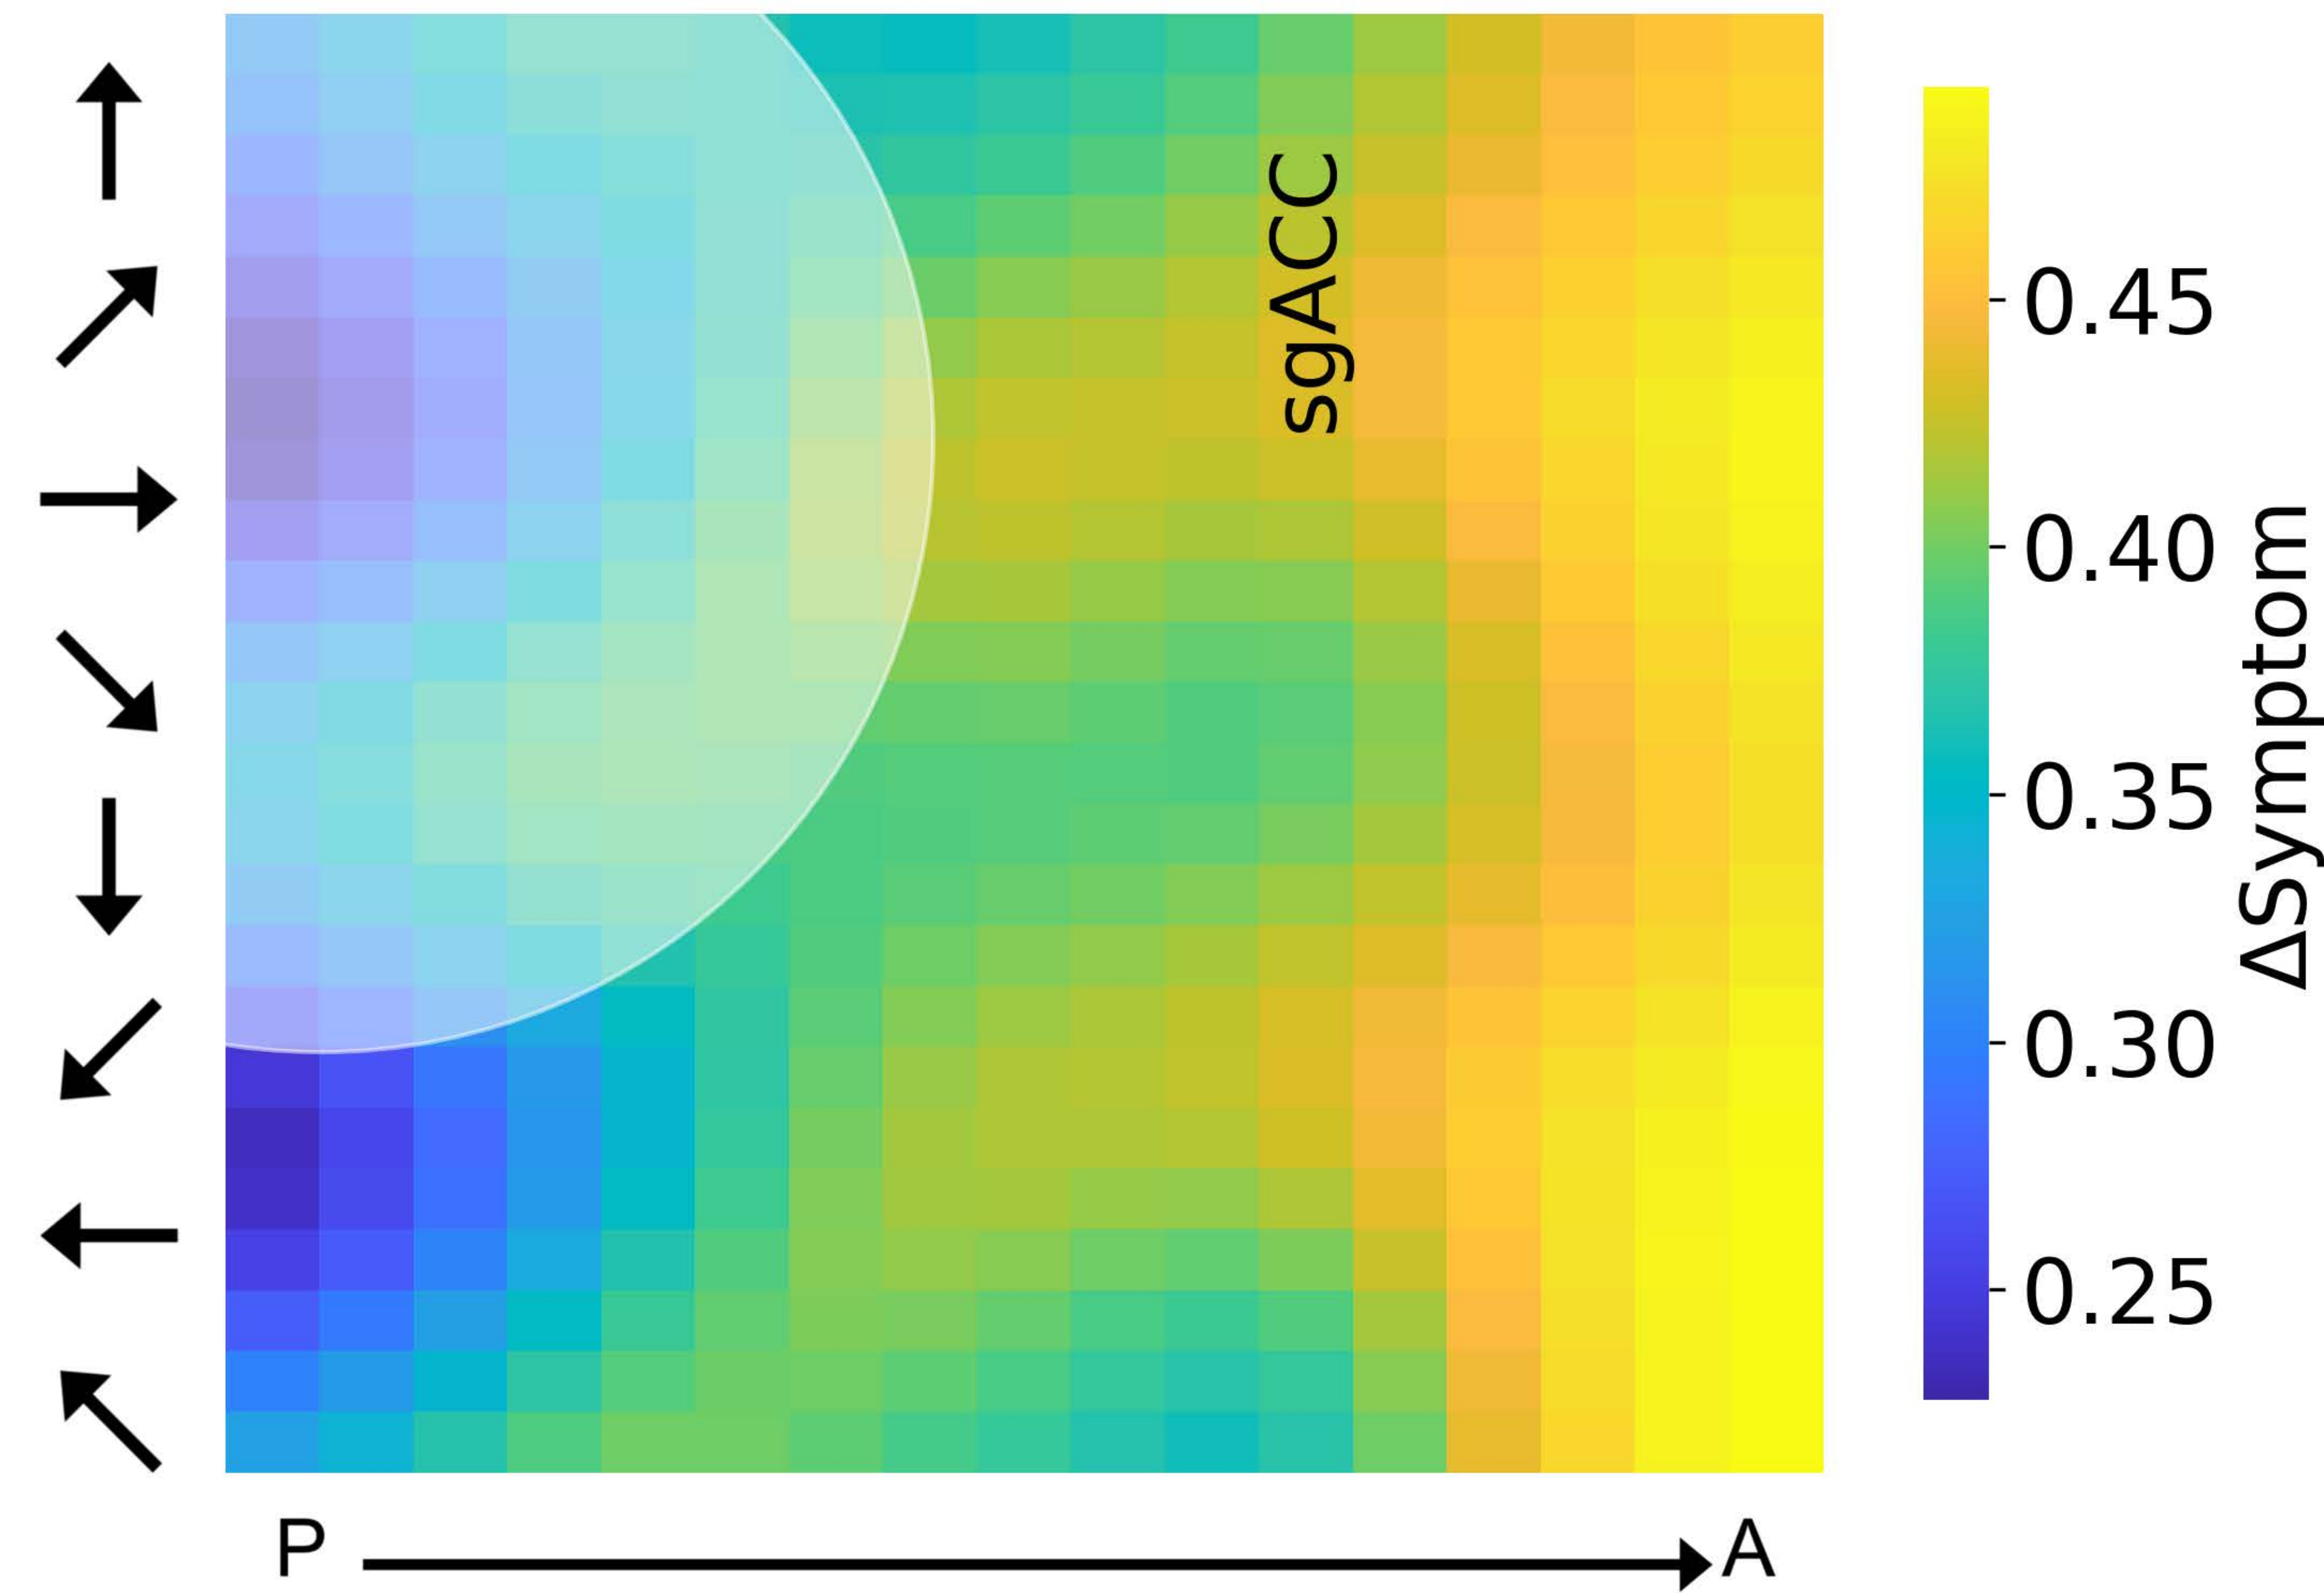



# NDARXH480BBY\_madrs\_left\_dlpfc

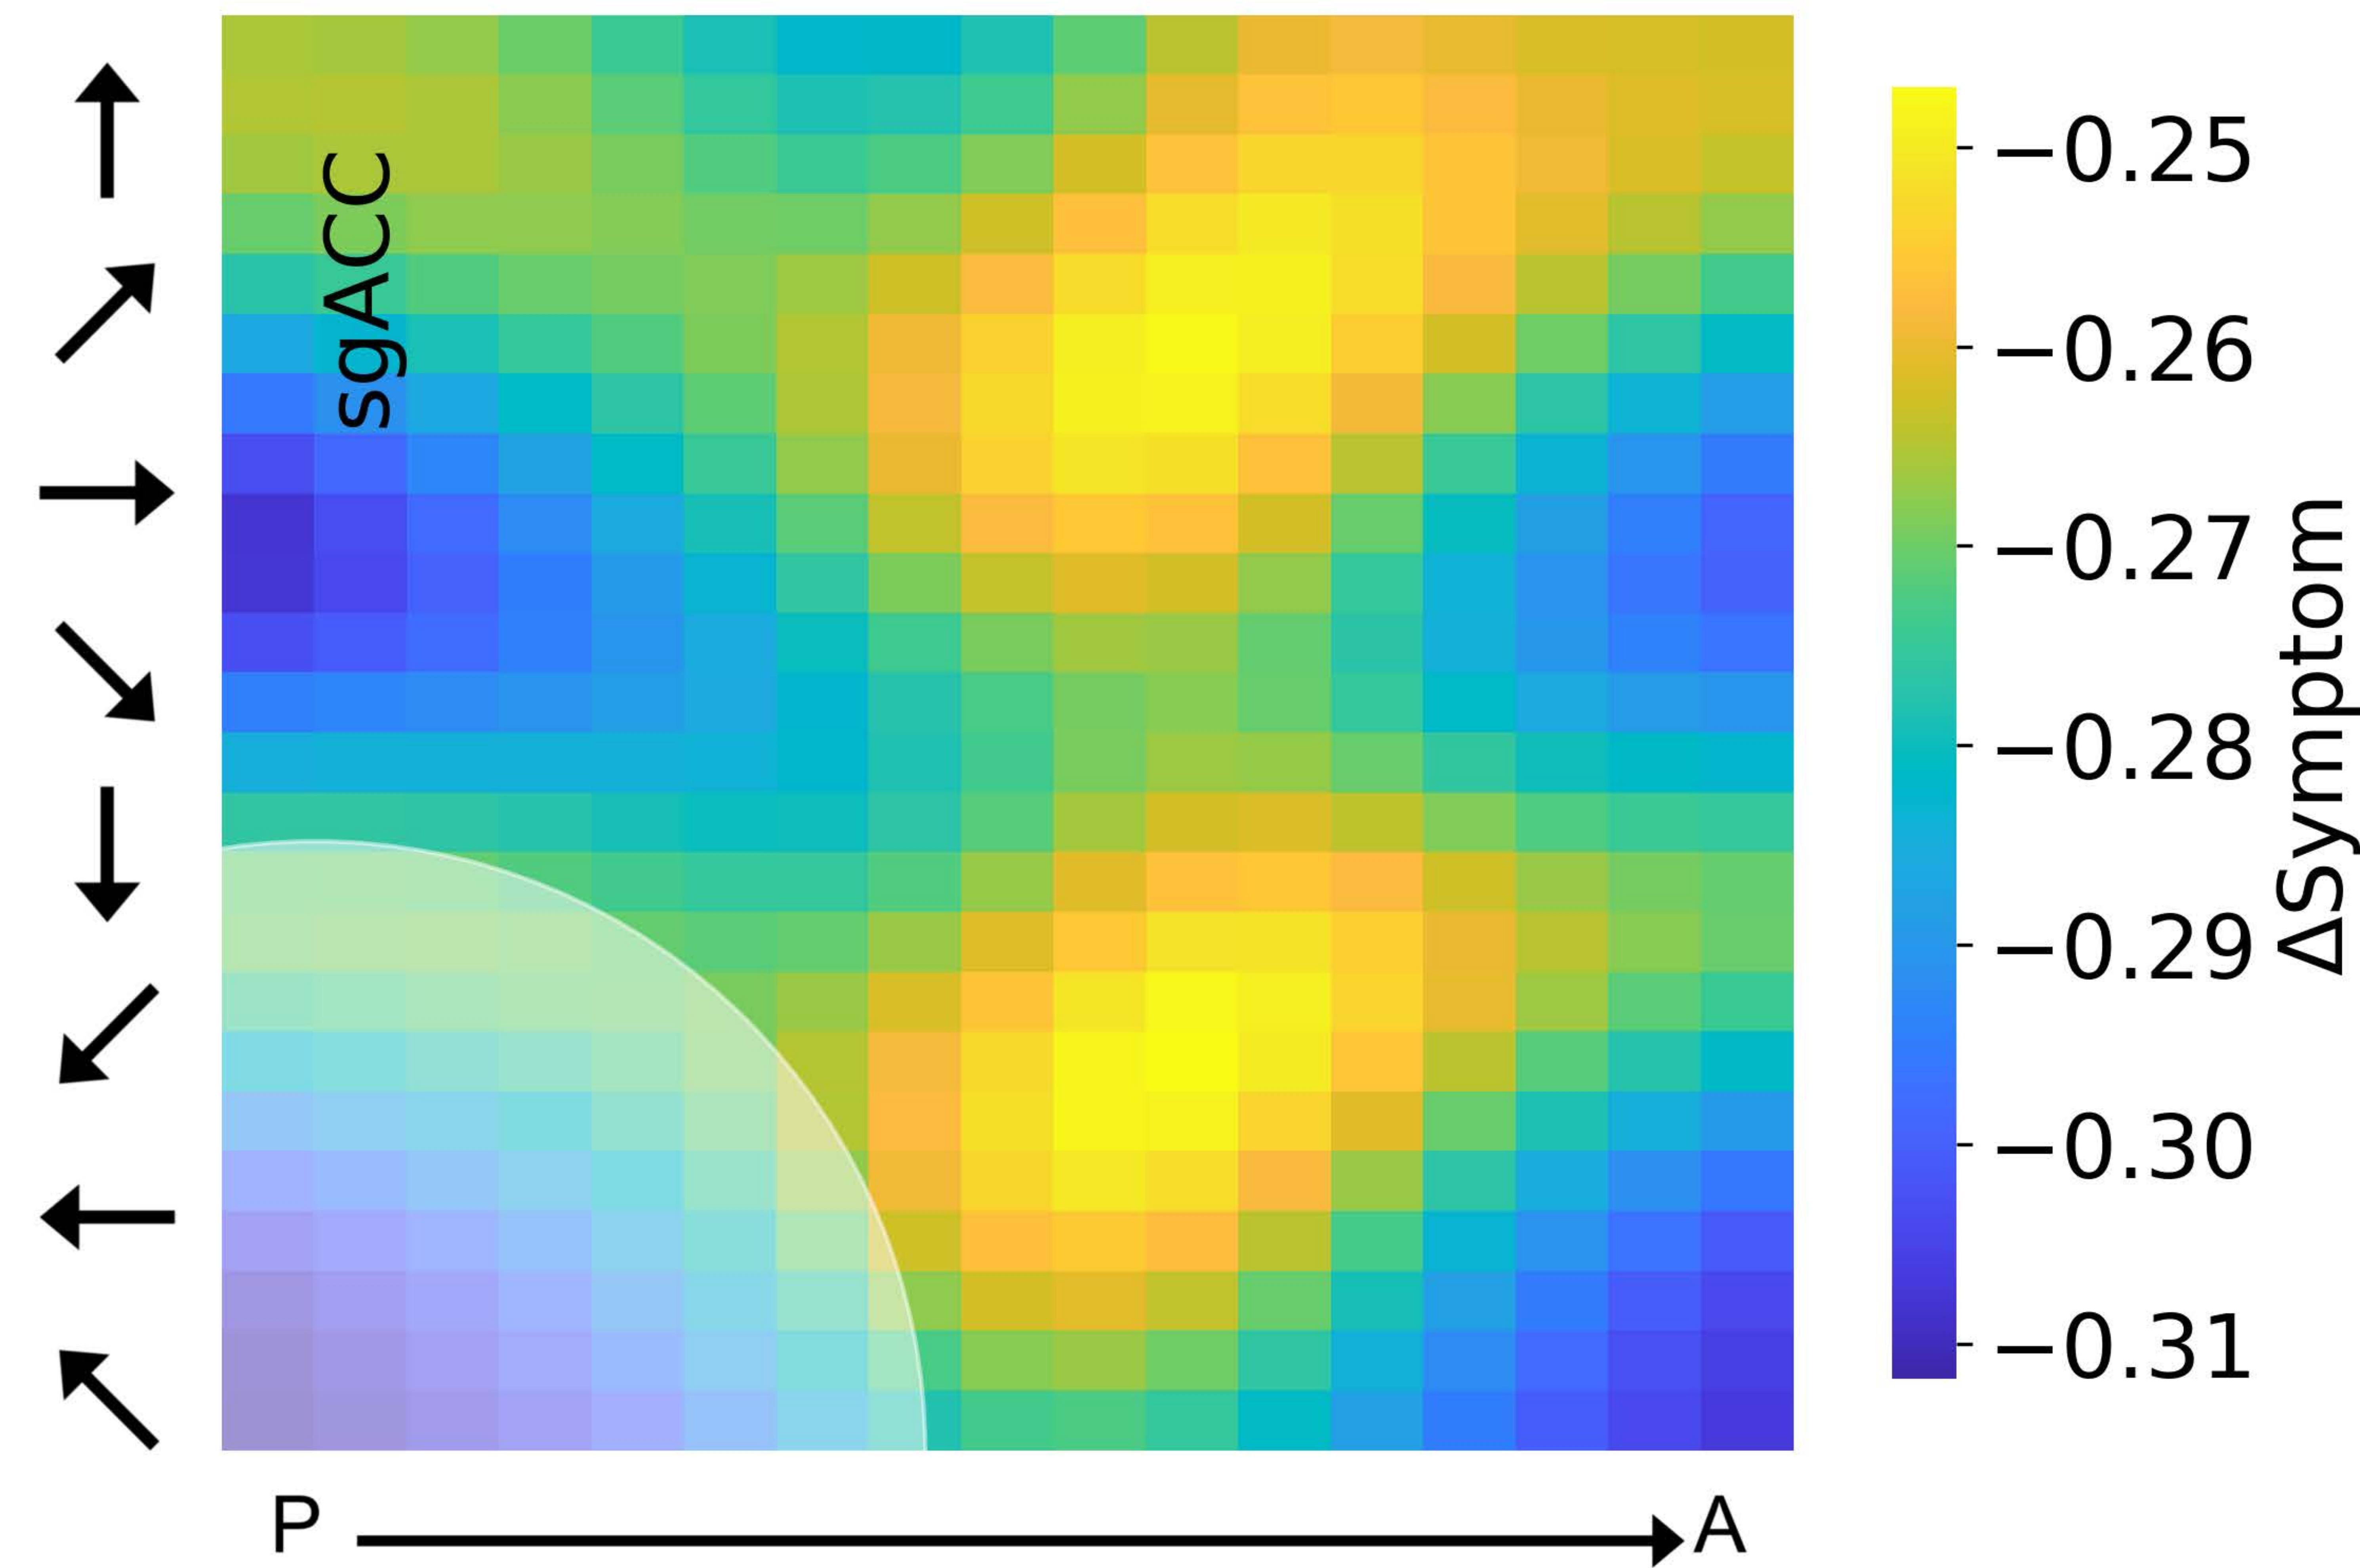



# NDARXU558HYG\_madrs\_left\_dlpfc

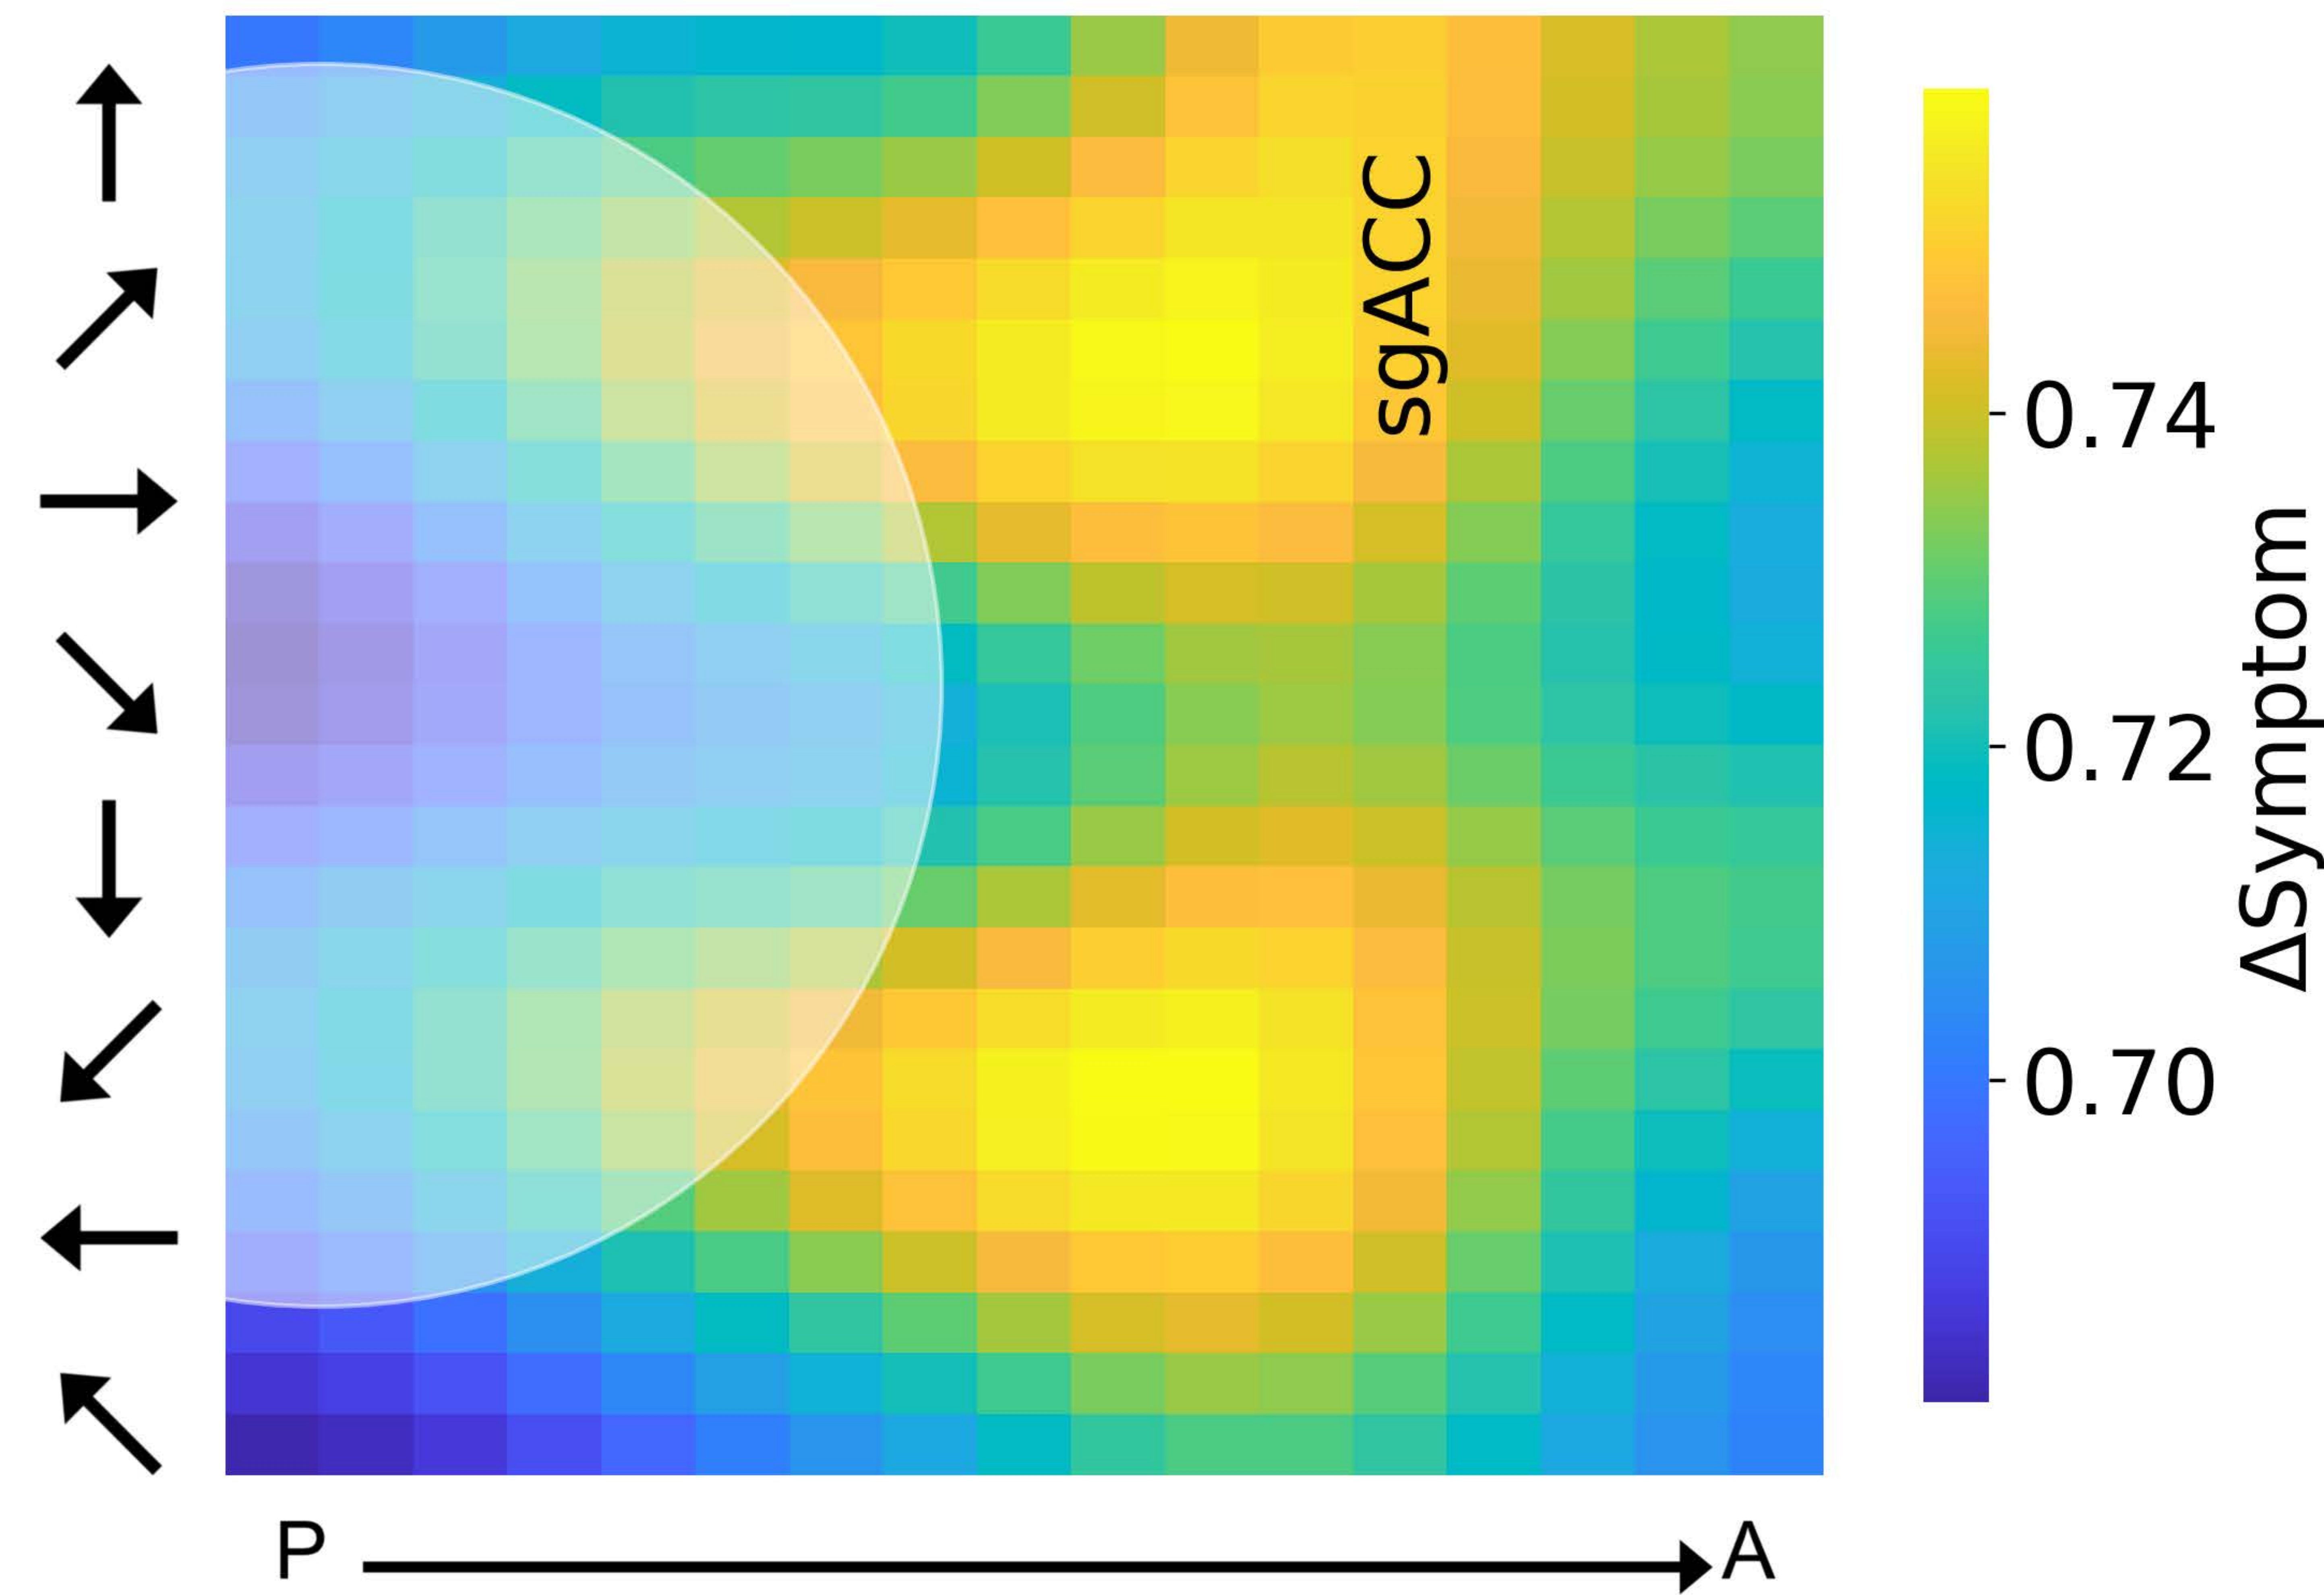



# NDARZW884MZC\_madr\_left\_dlpfc

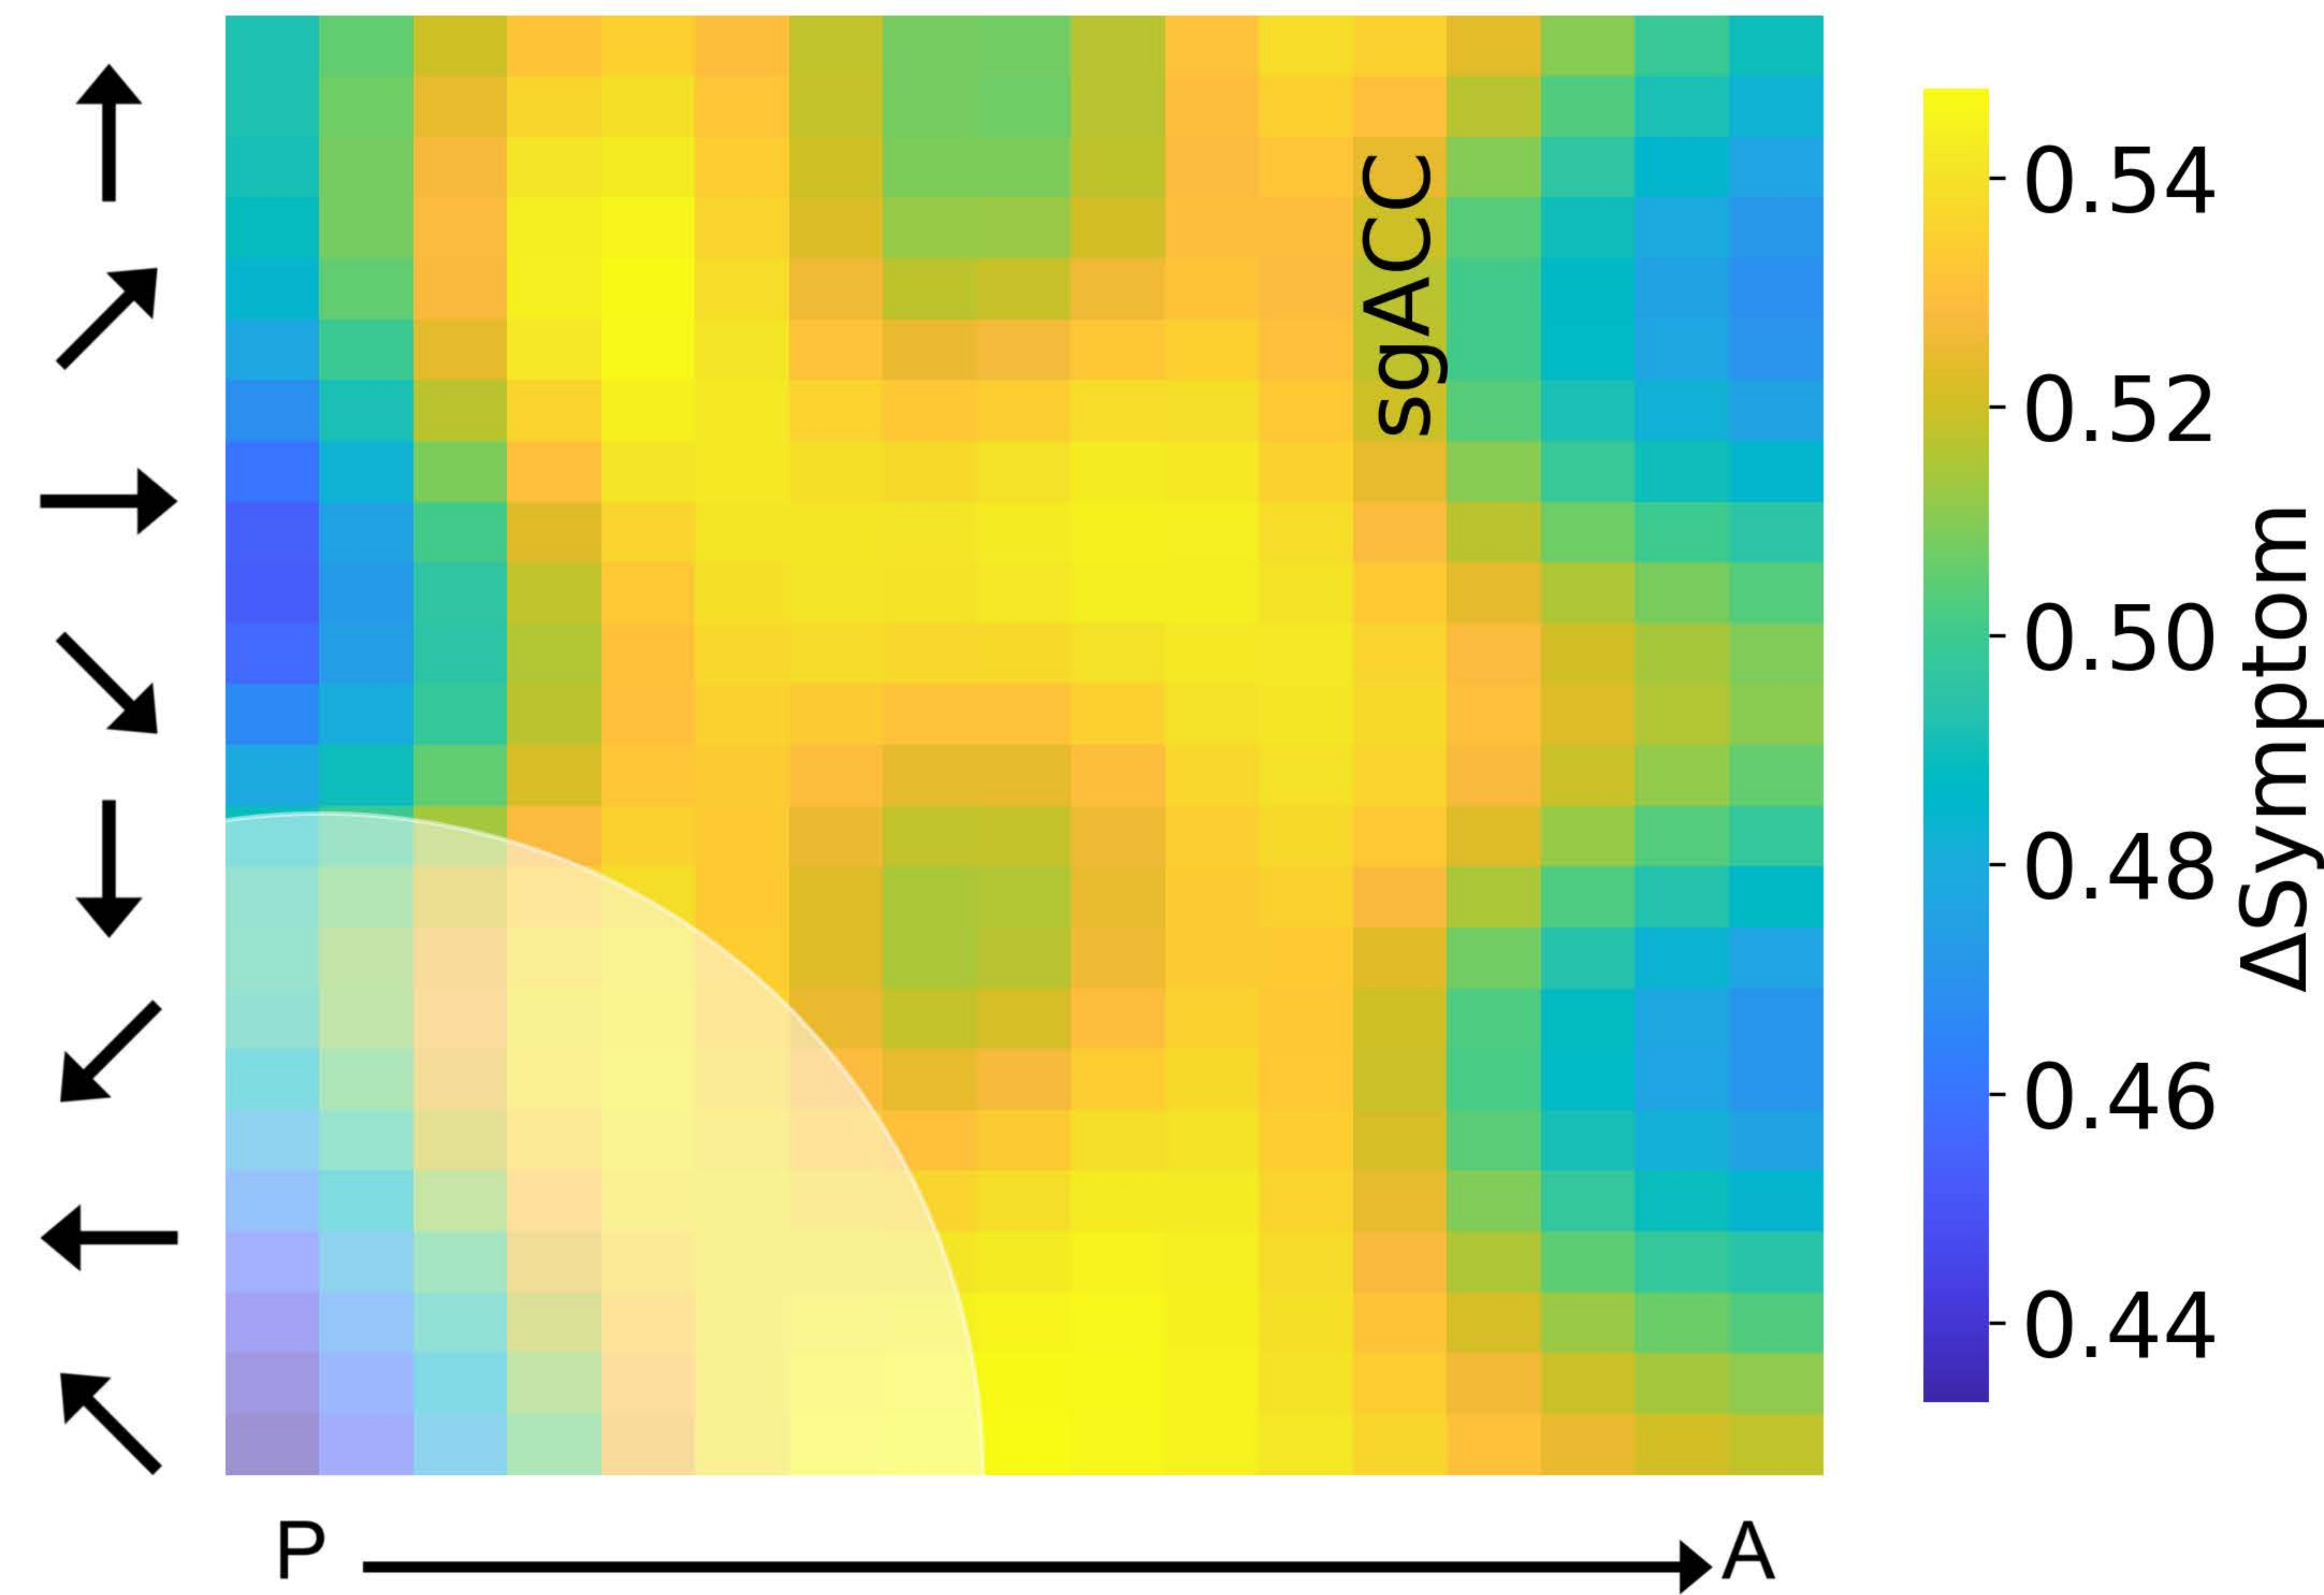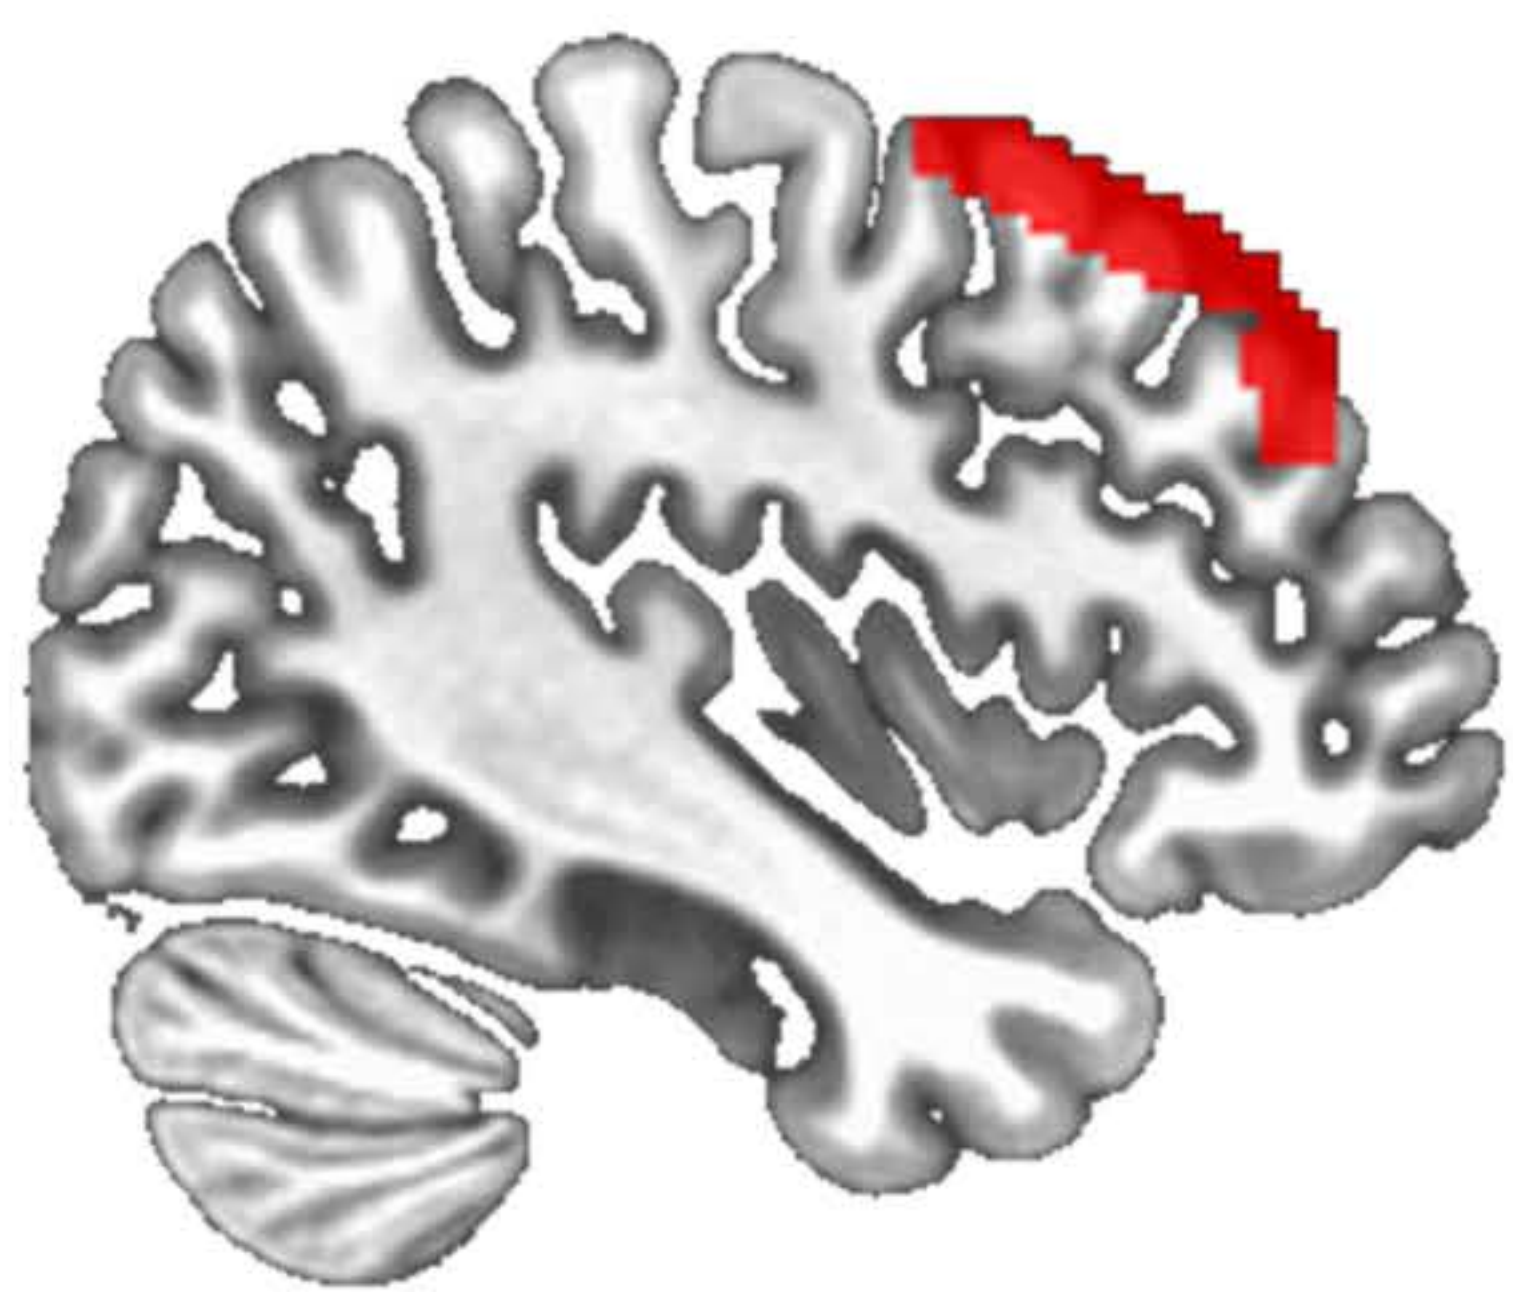



# NDARAC286ZE7\_madrs\_right\_dlpfc

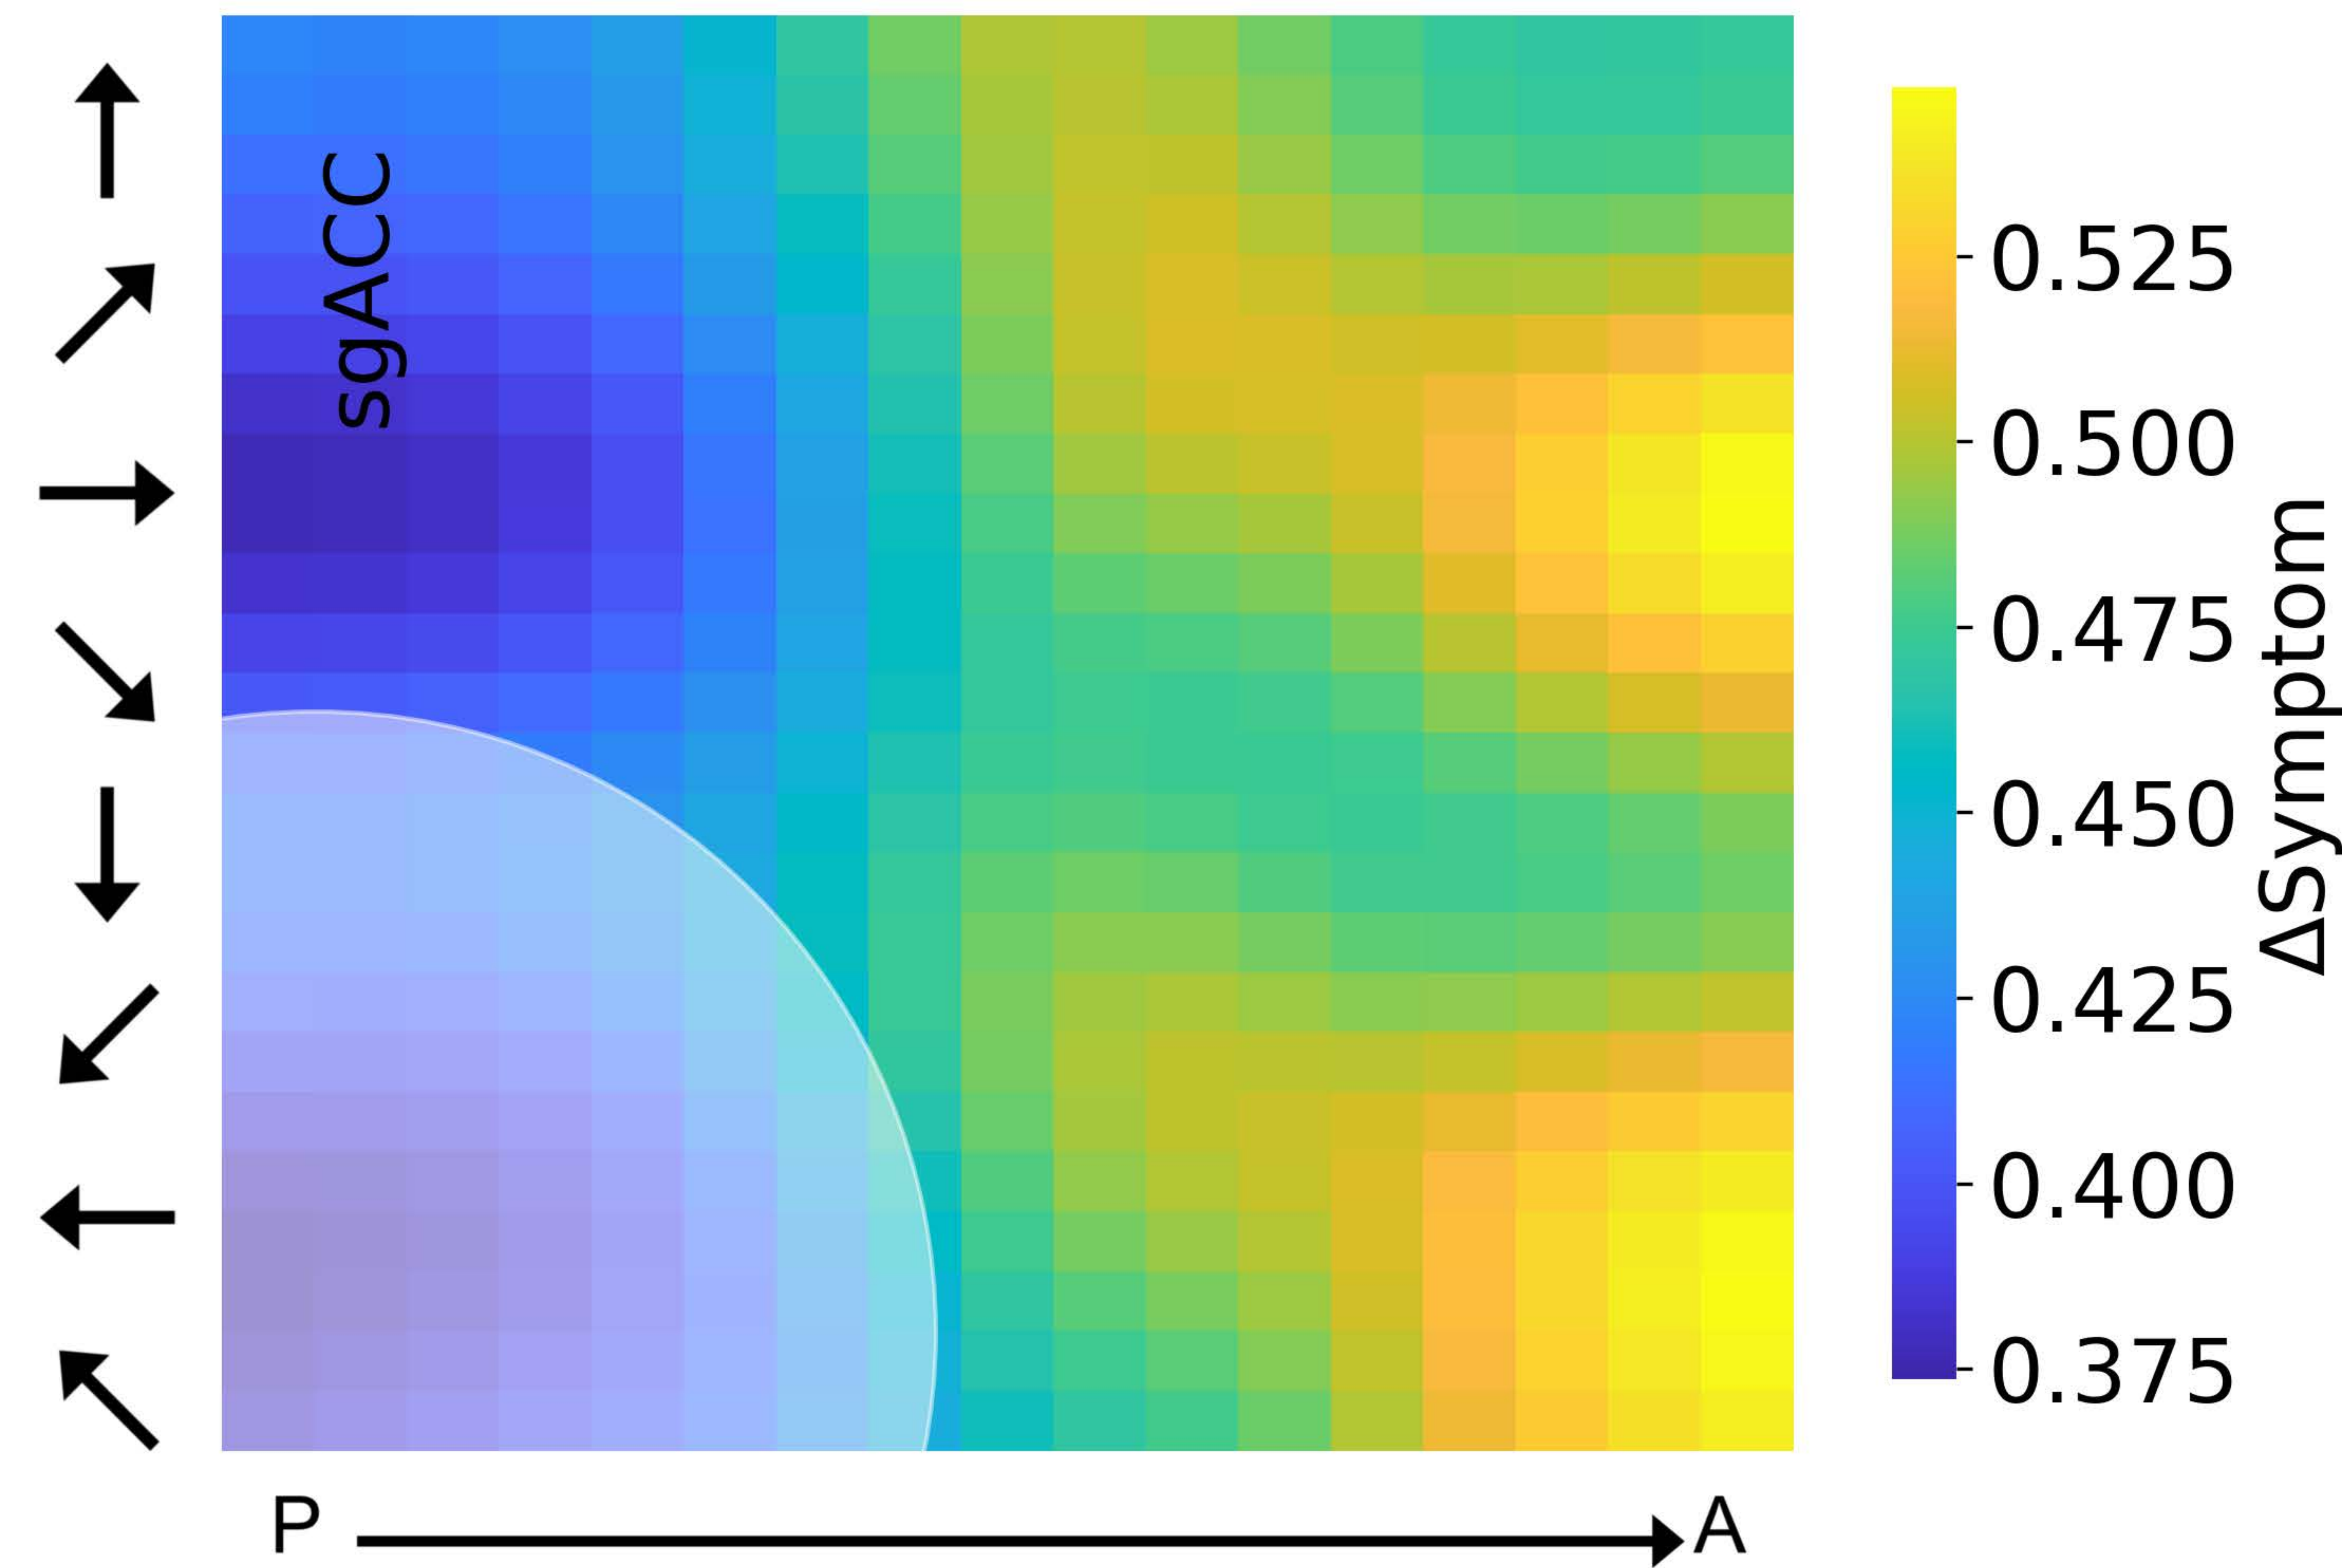



# NDARAC789HEZ\_madrs\_right\_dlpfc

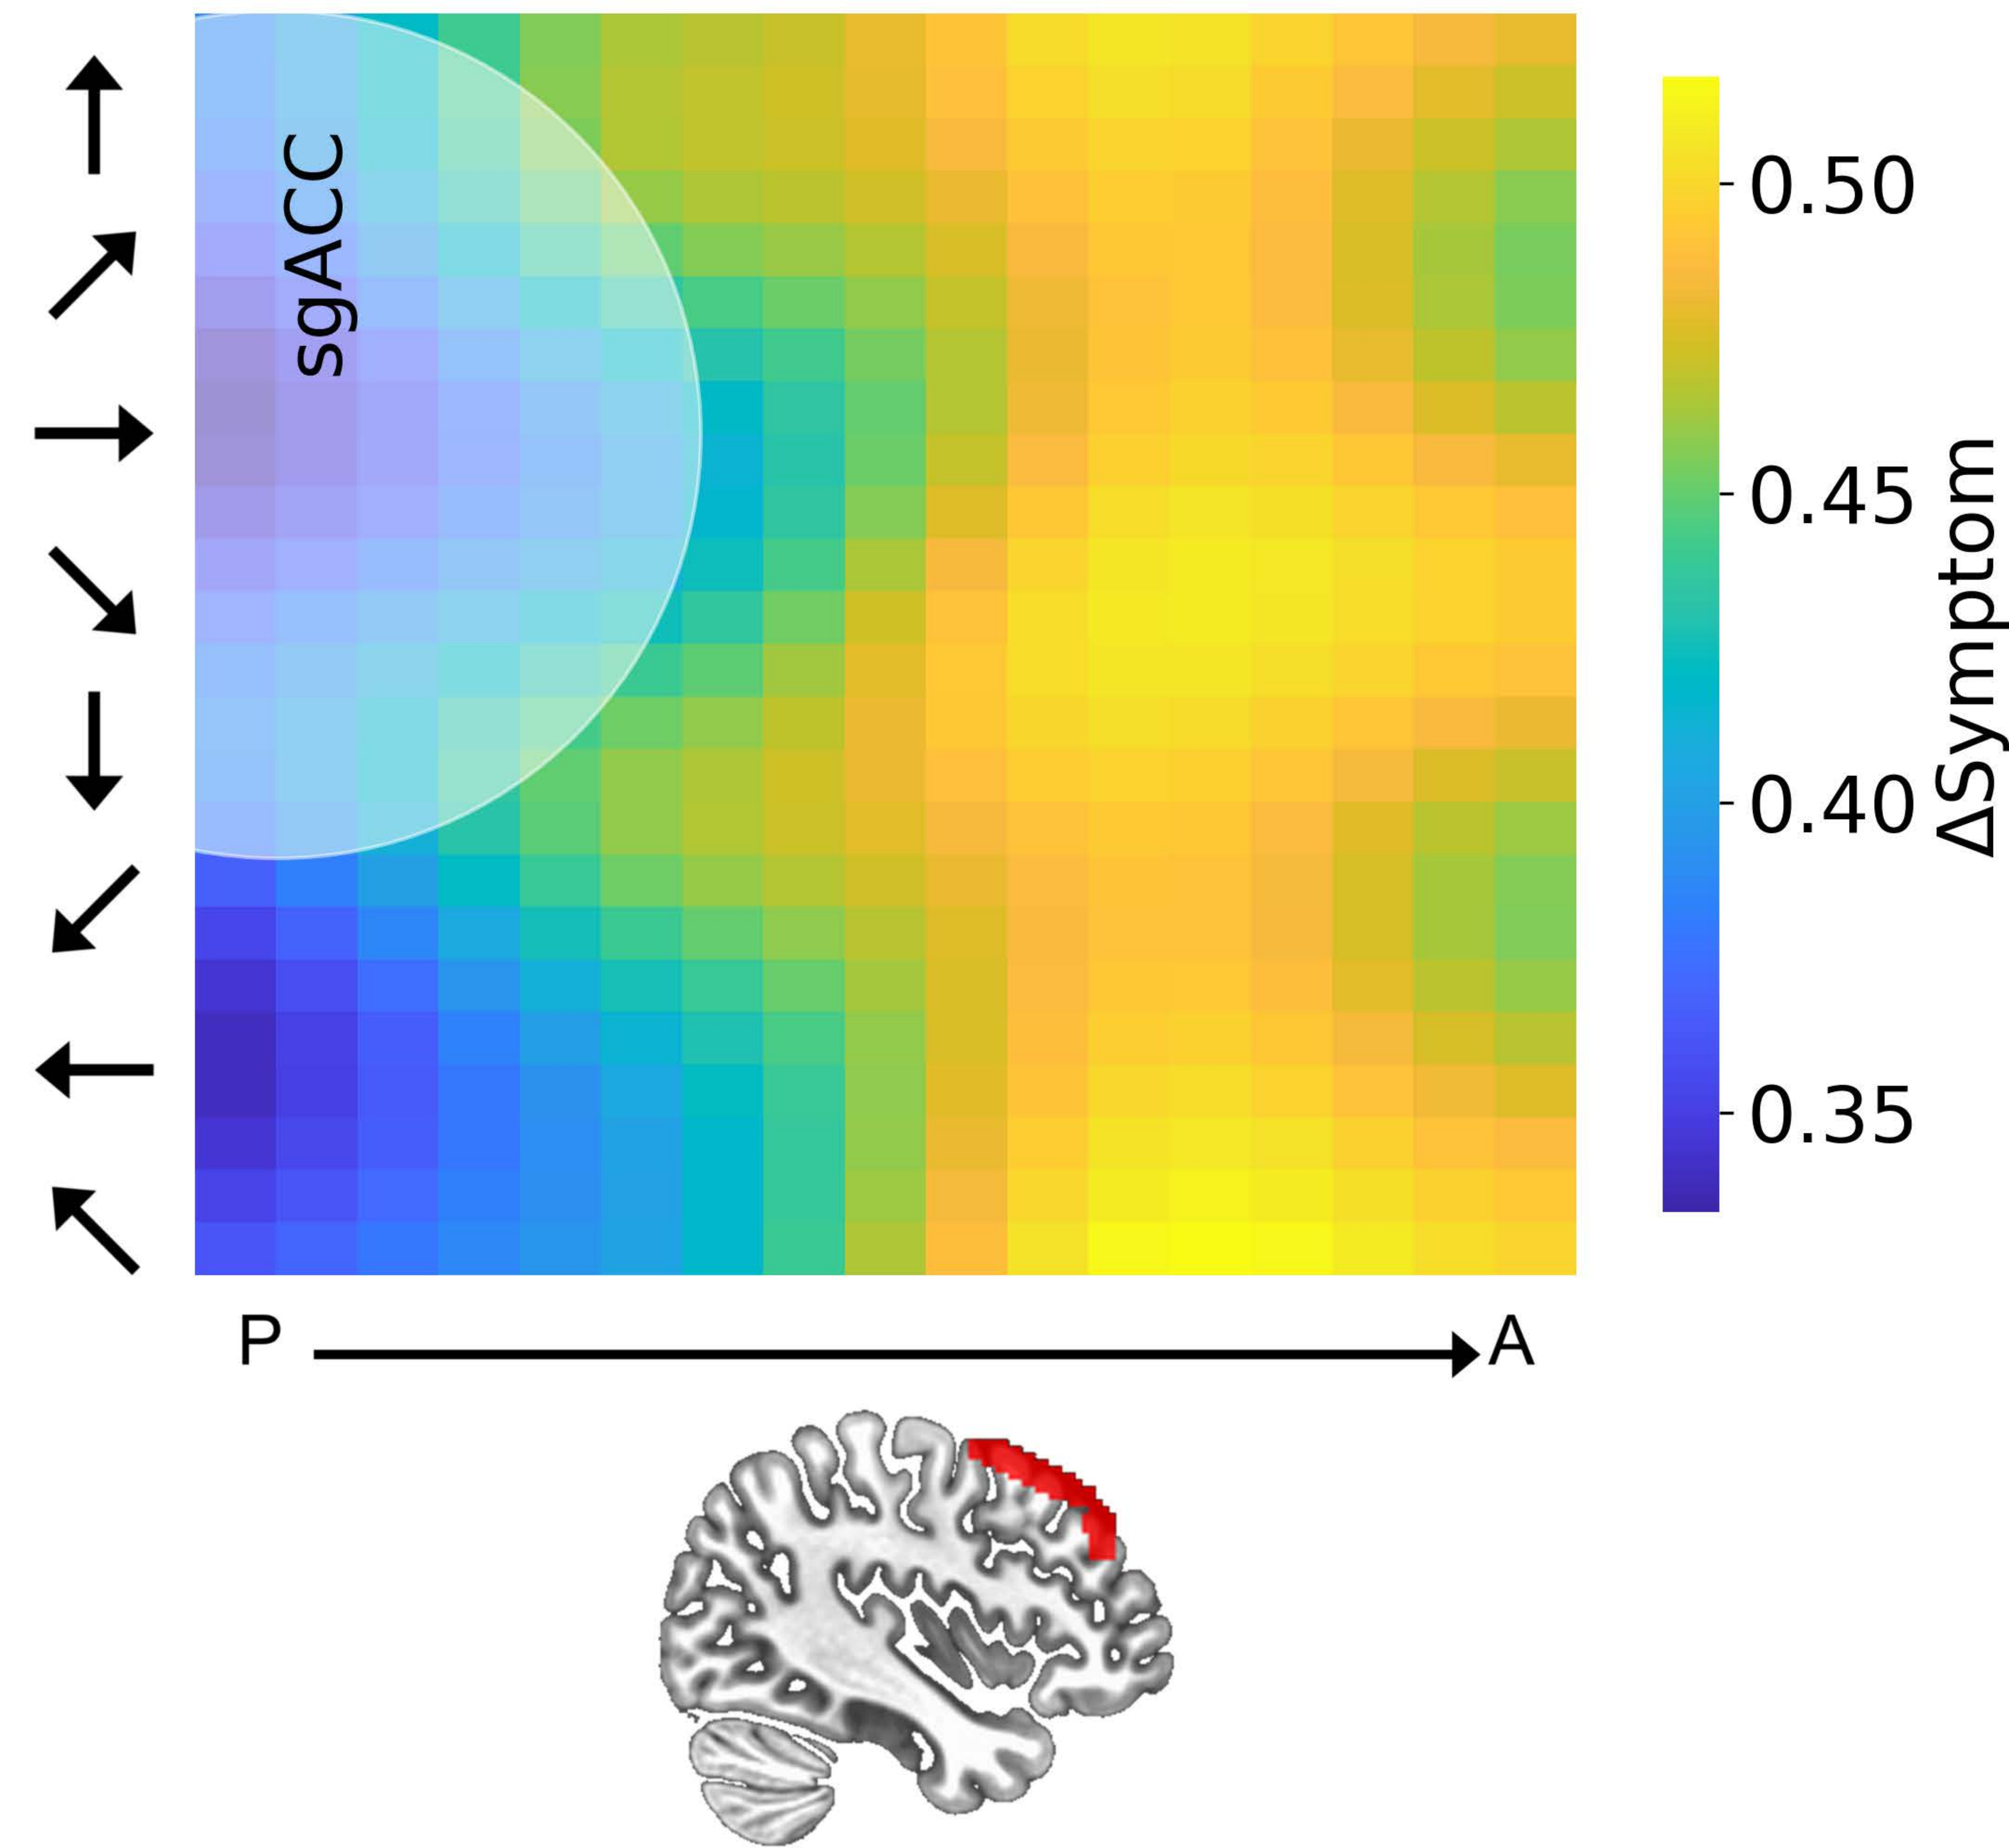



# NDARBD224PBF\_madrs\_right\_dlpfc

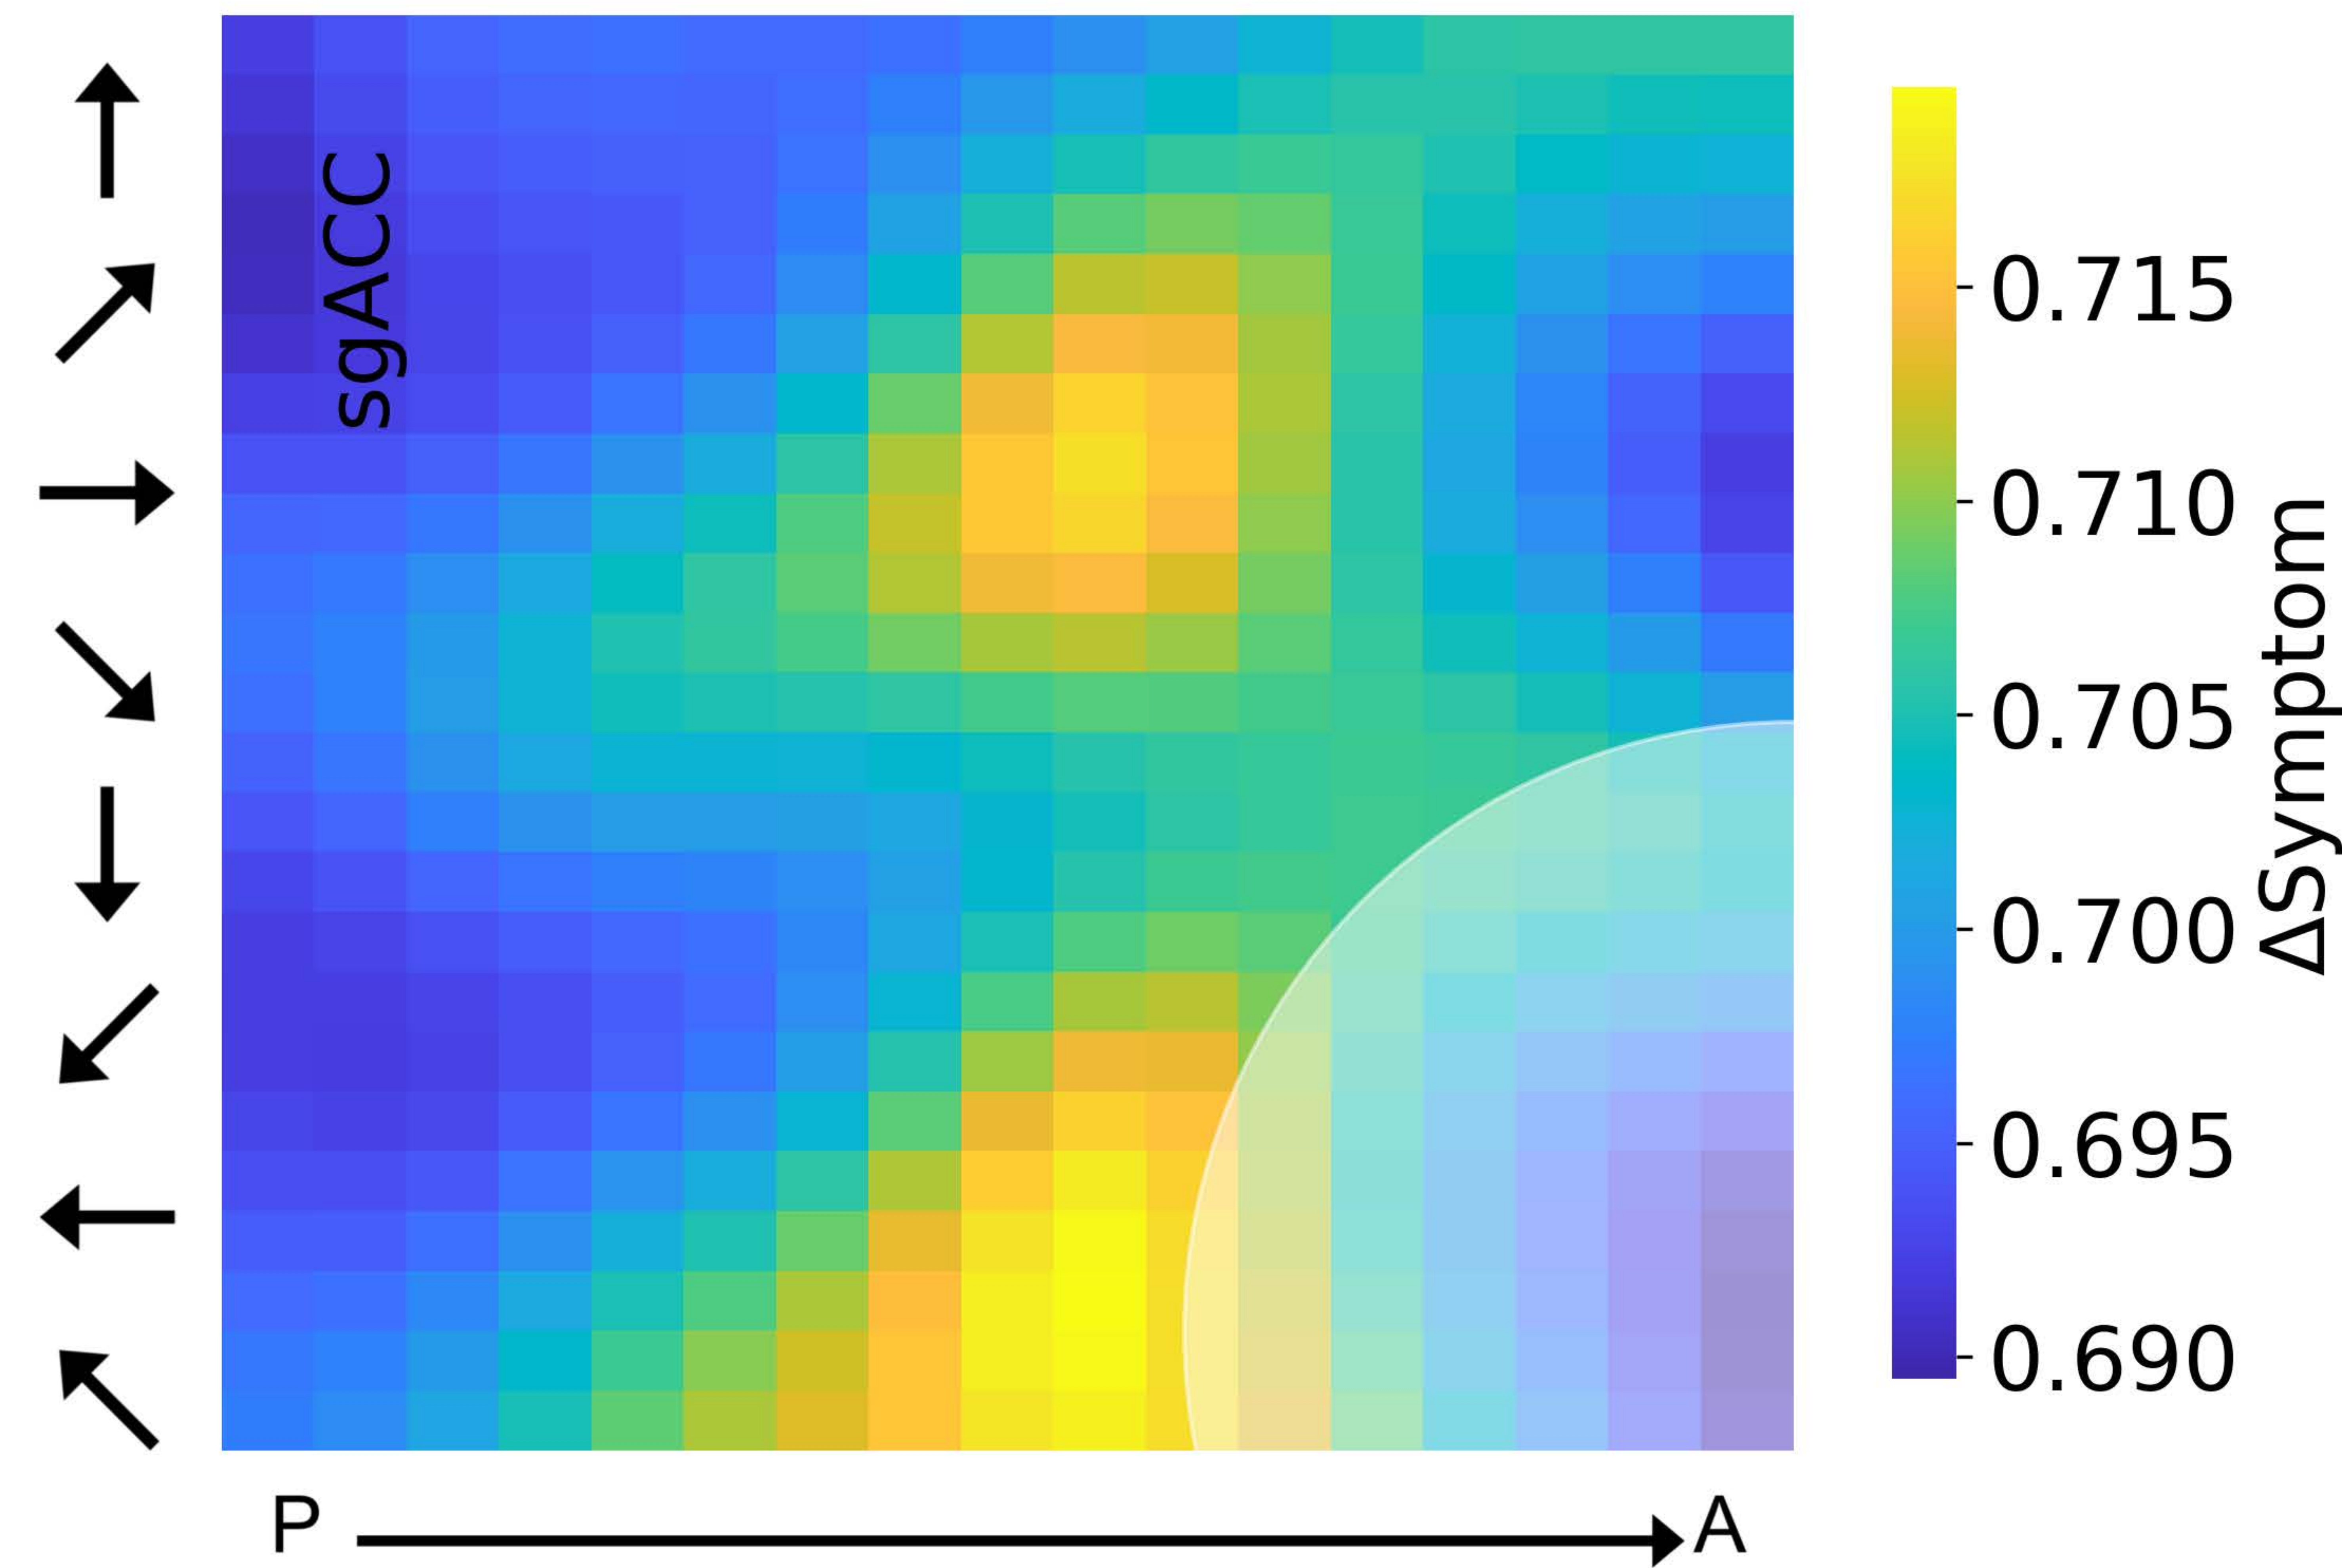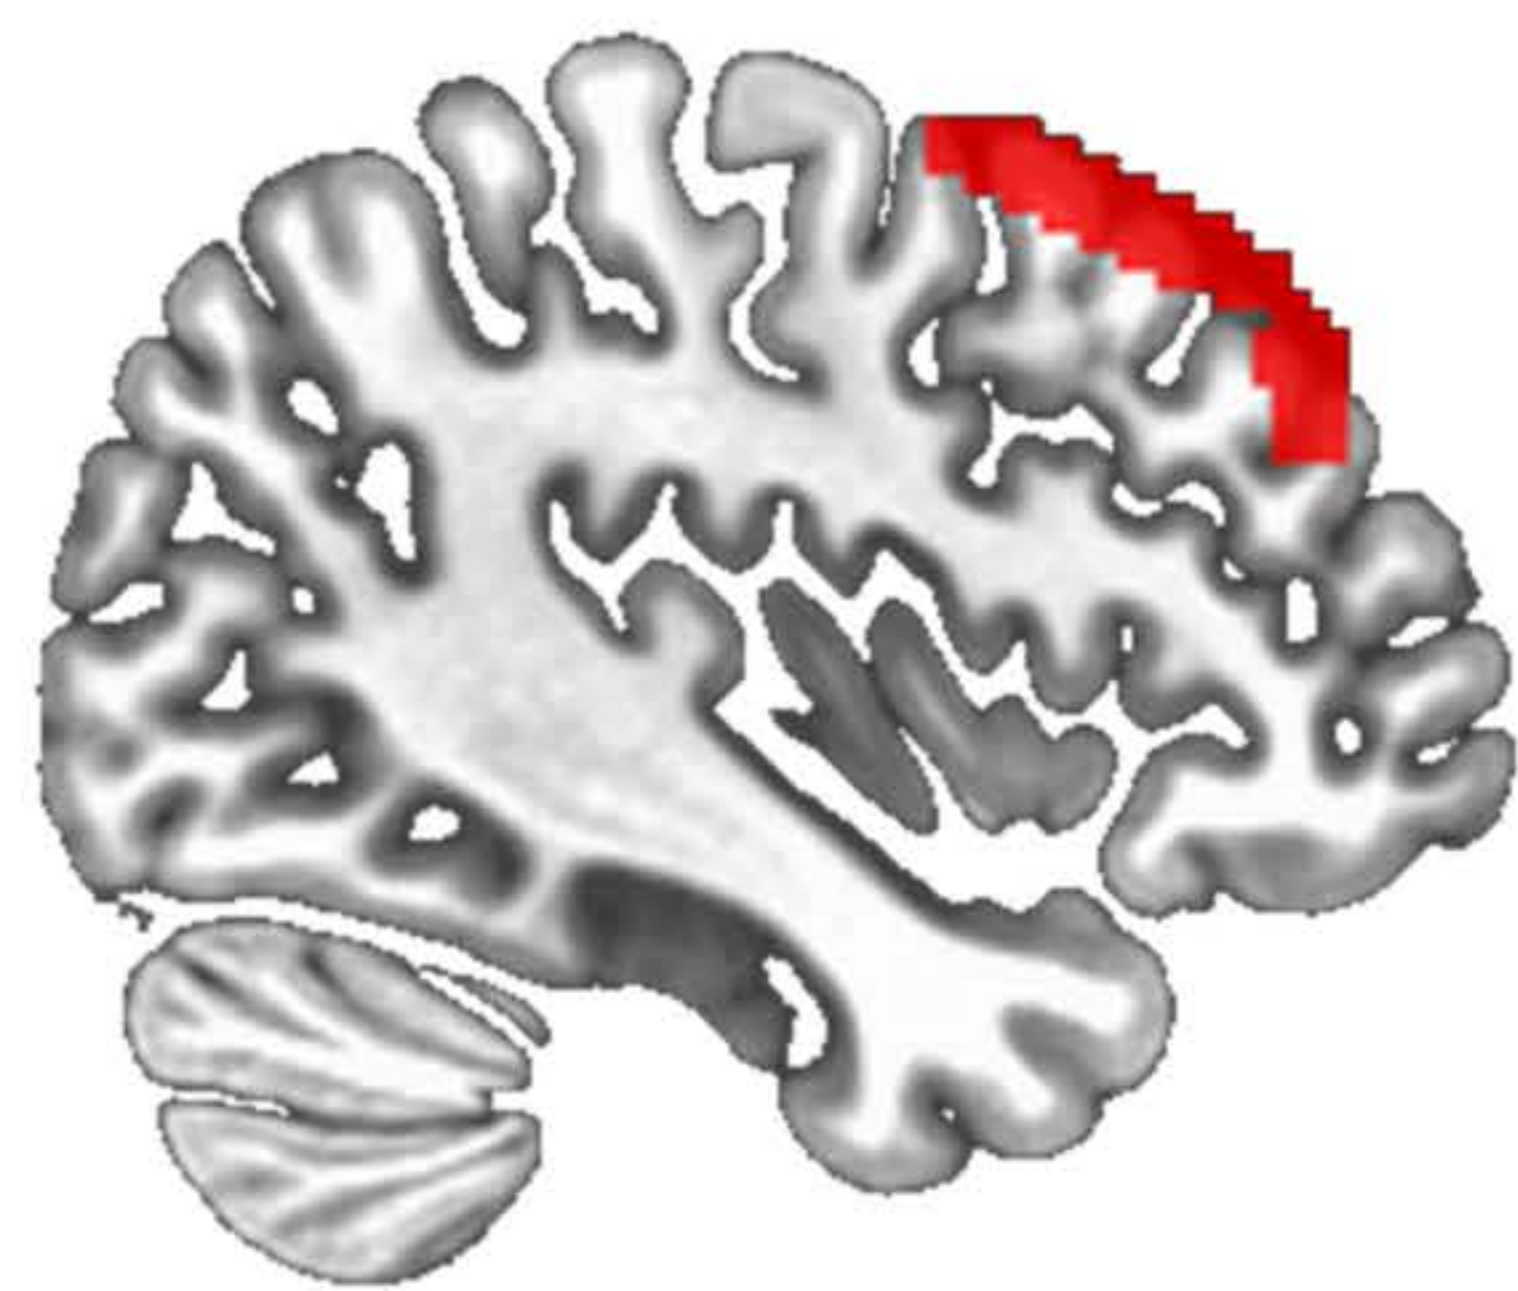



# NDARBF292NPE\_madrs\_right\_dlpfc

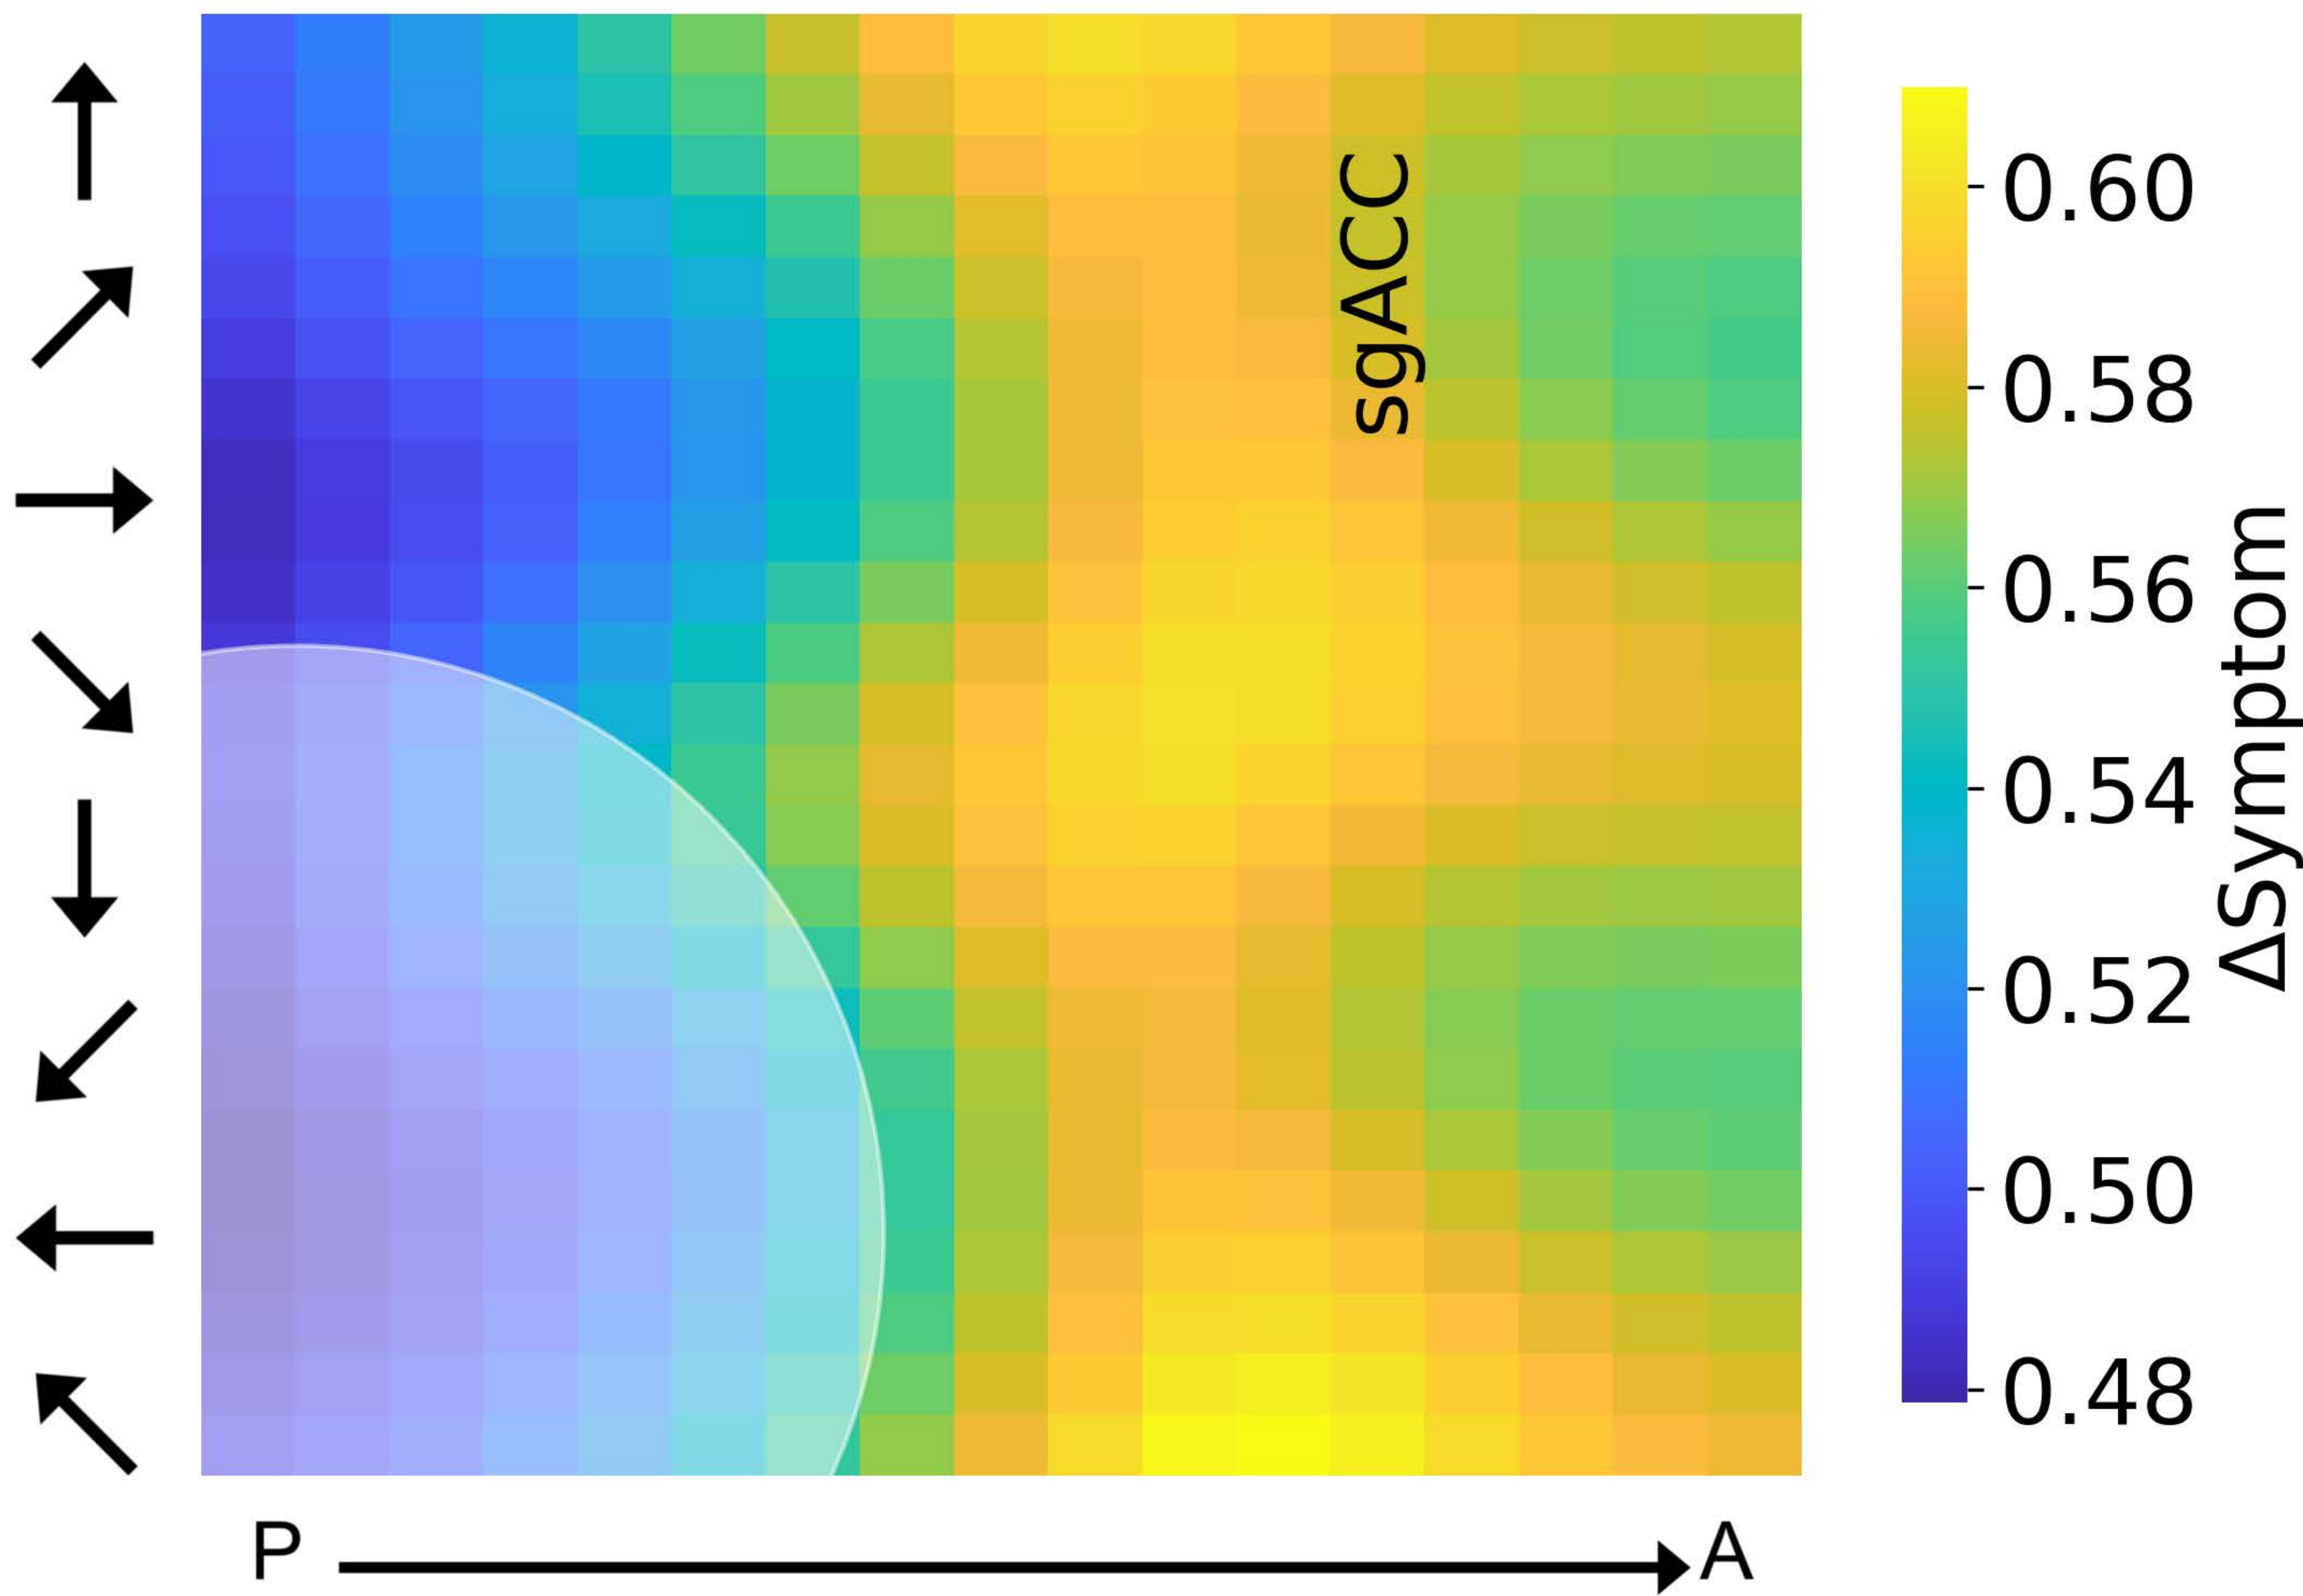



# NDARCG535CPC\_madr\_right\_dlpfc

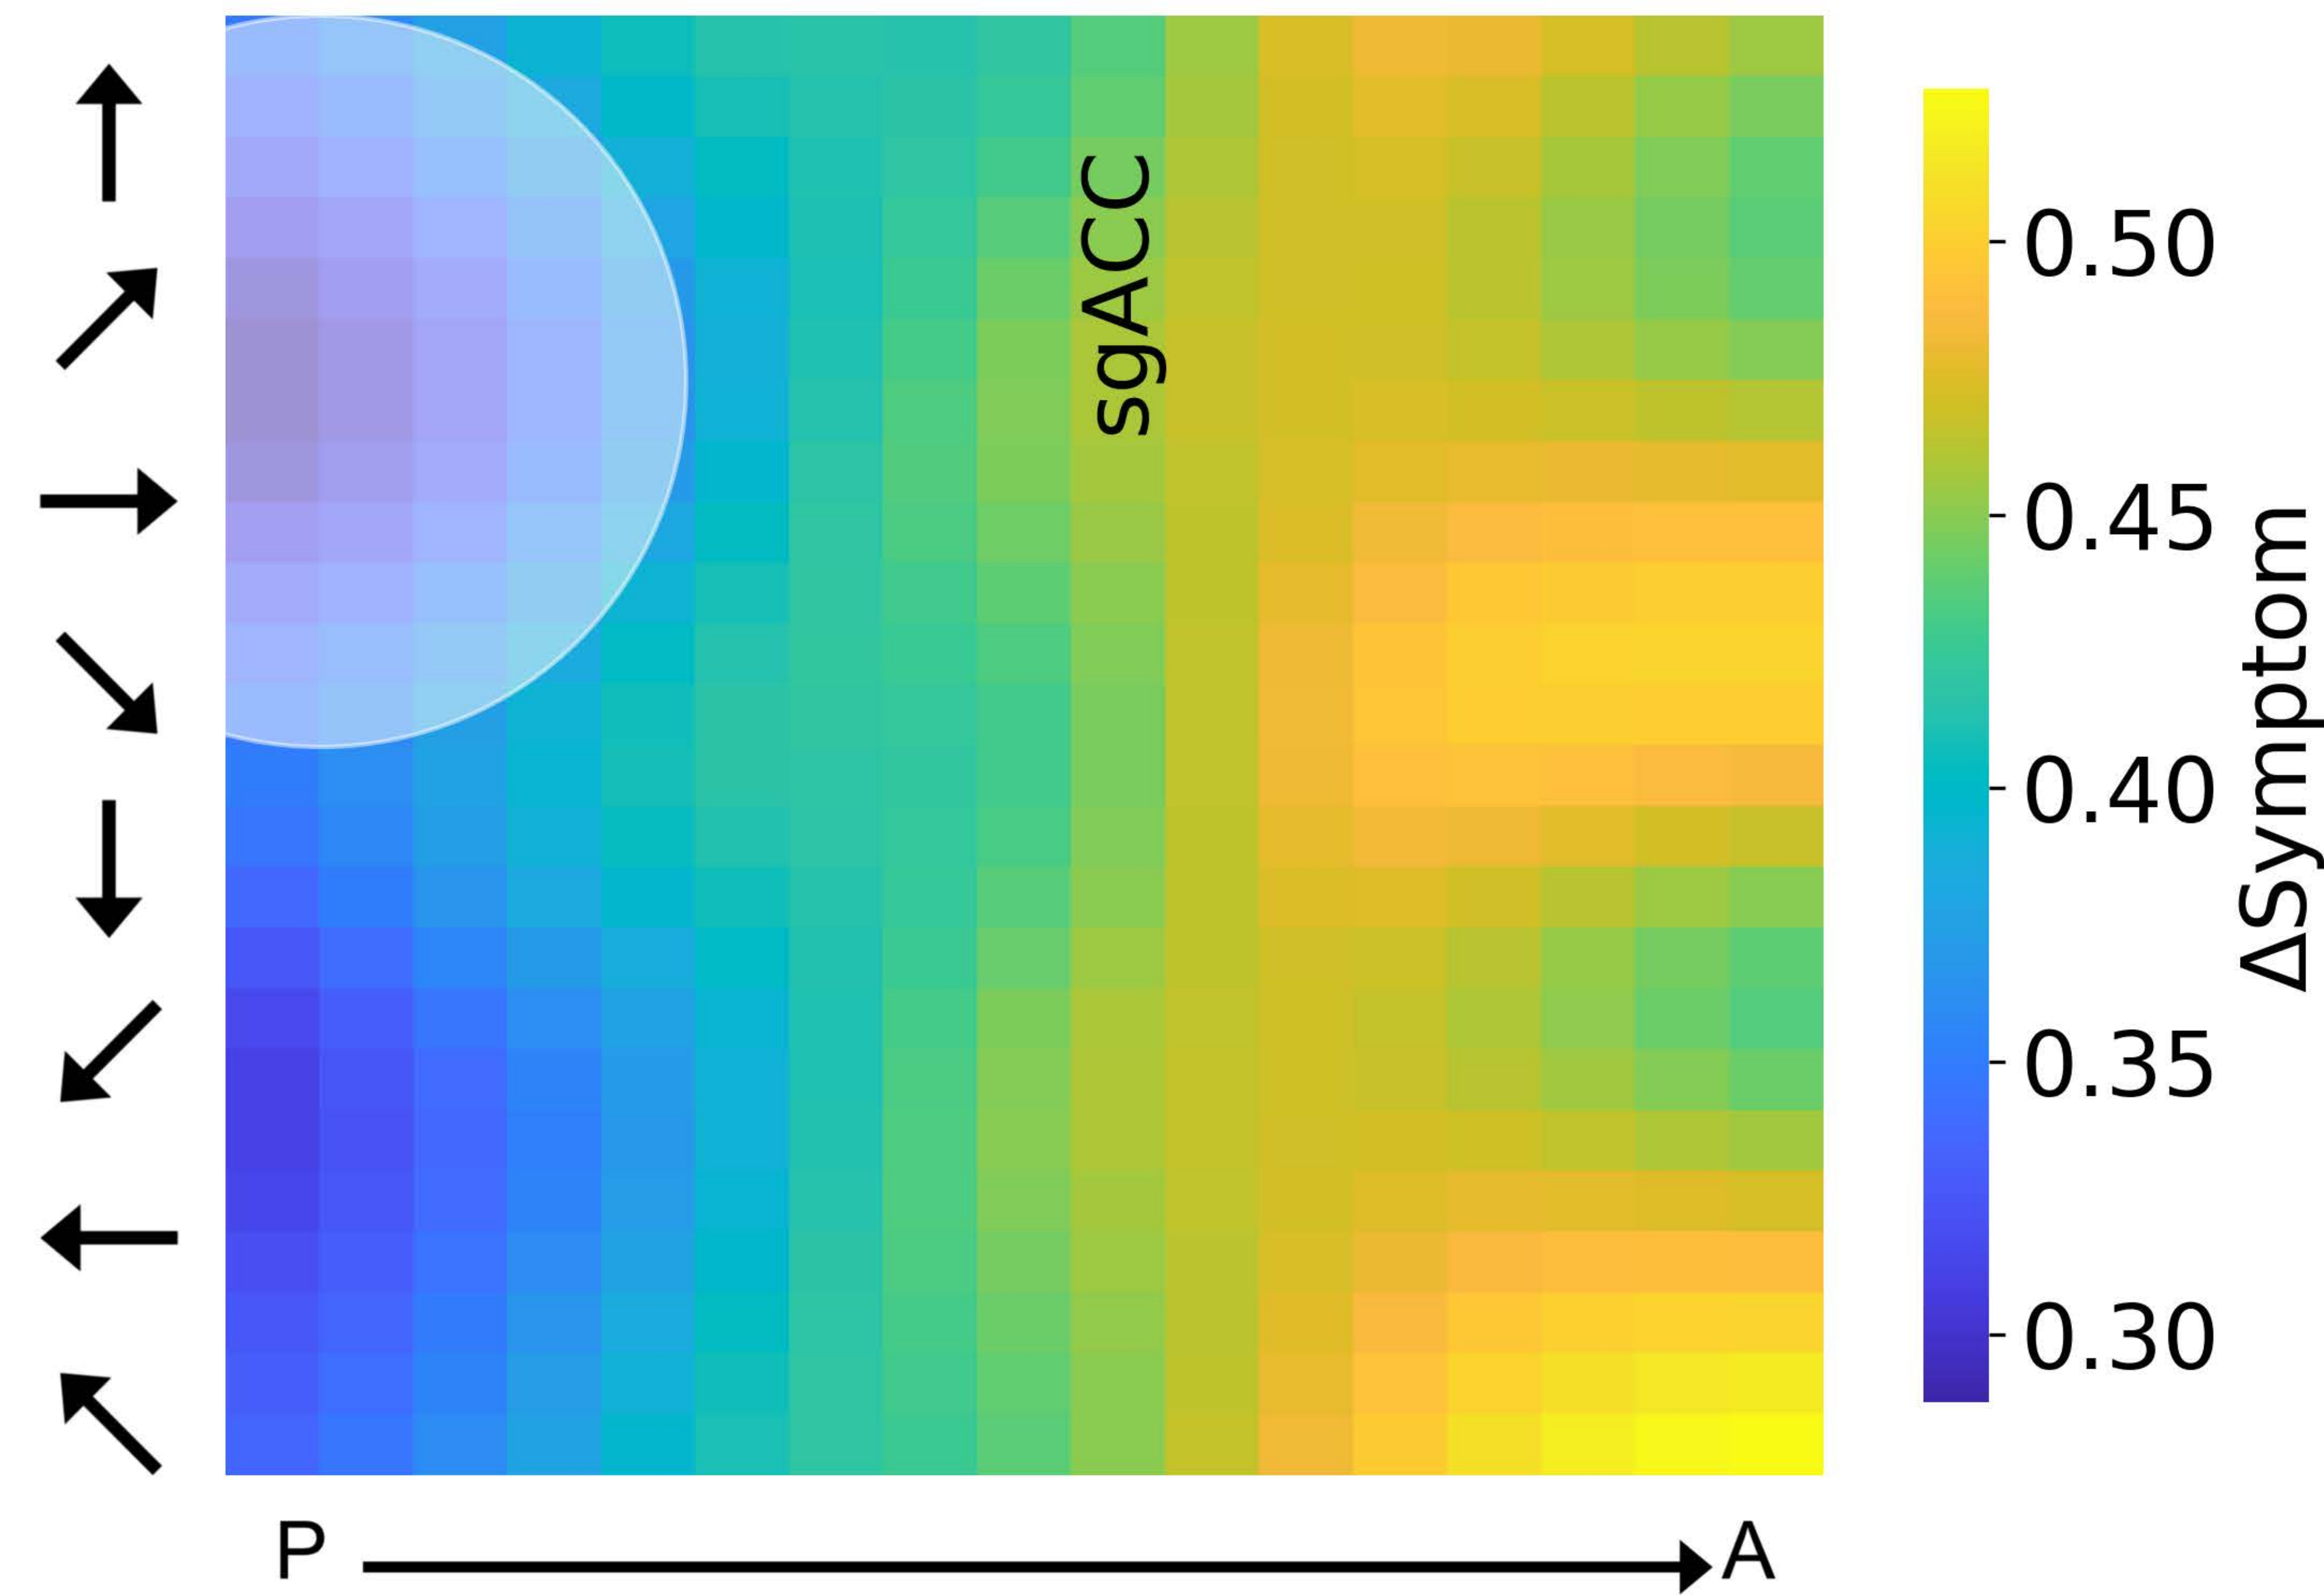



# INDARC406TU1\_madrs\_right\_dlpfc

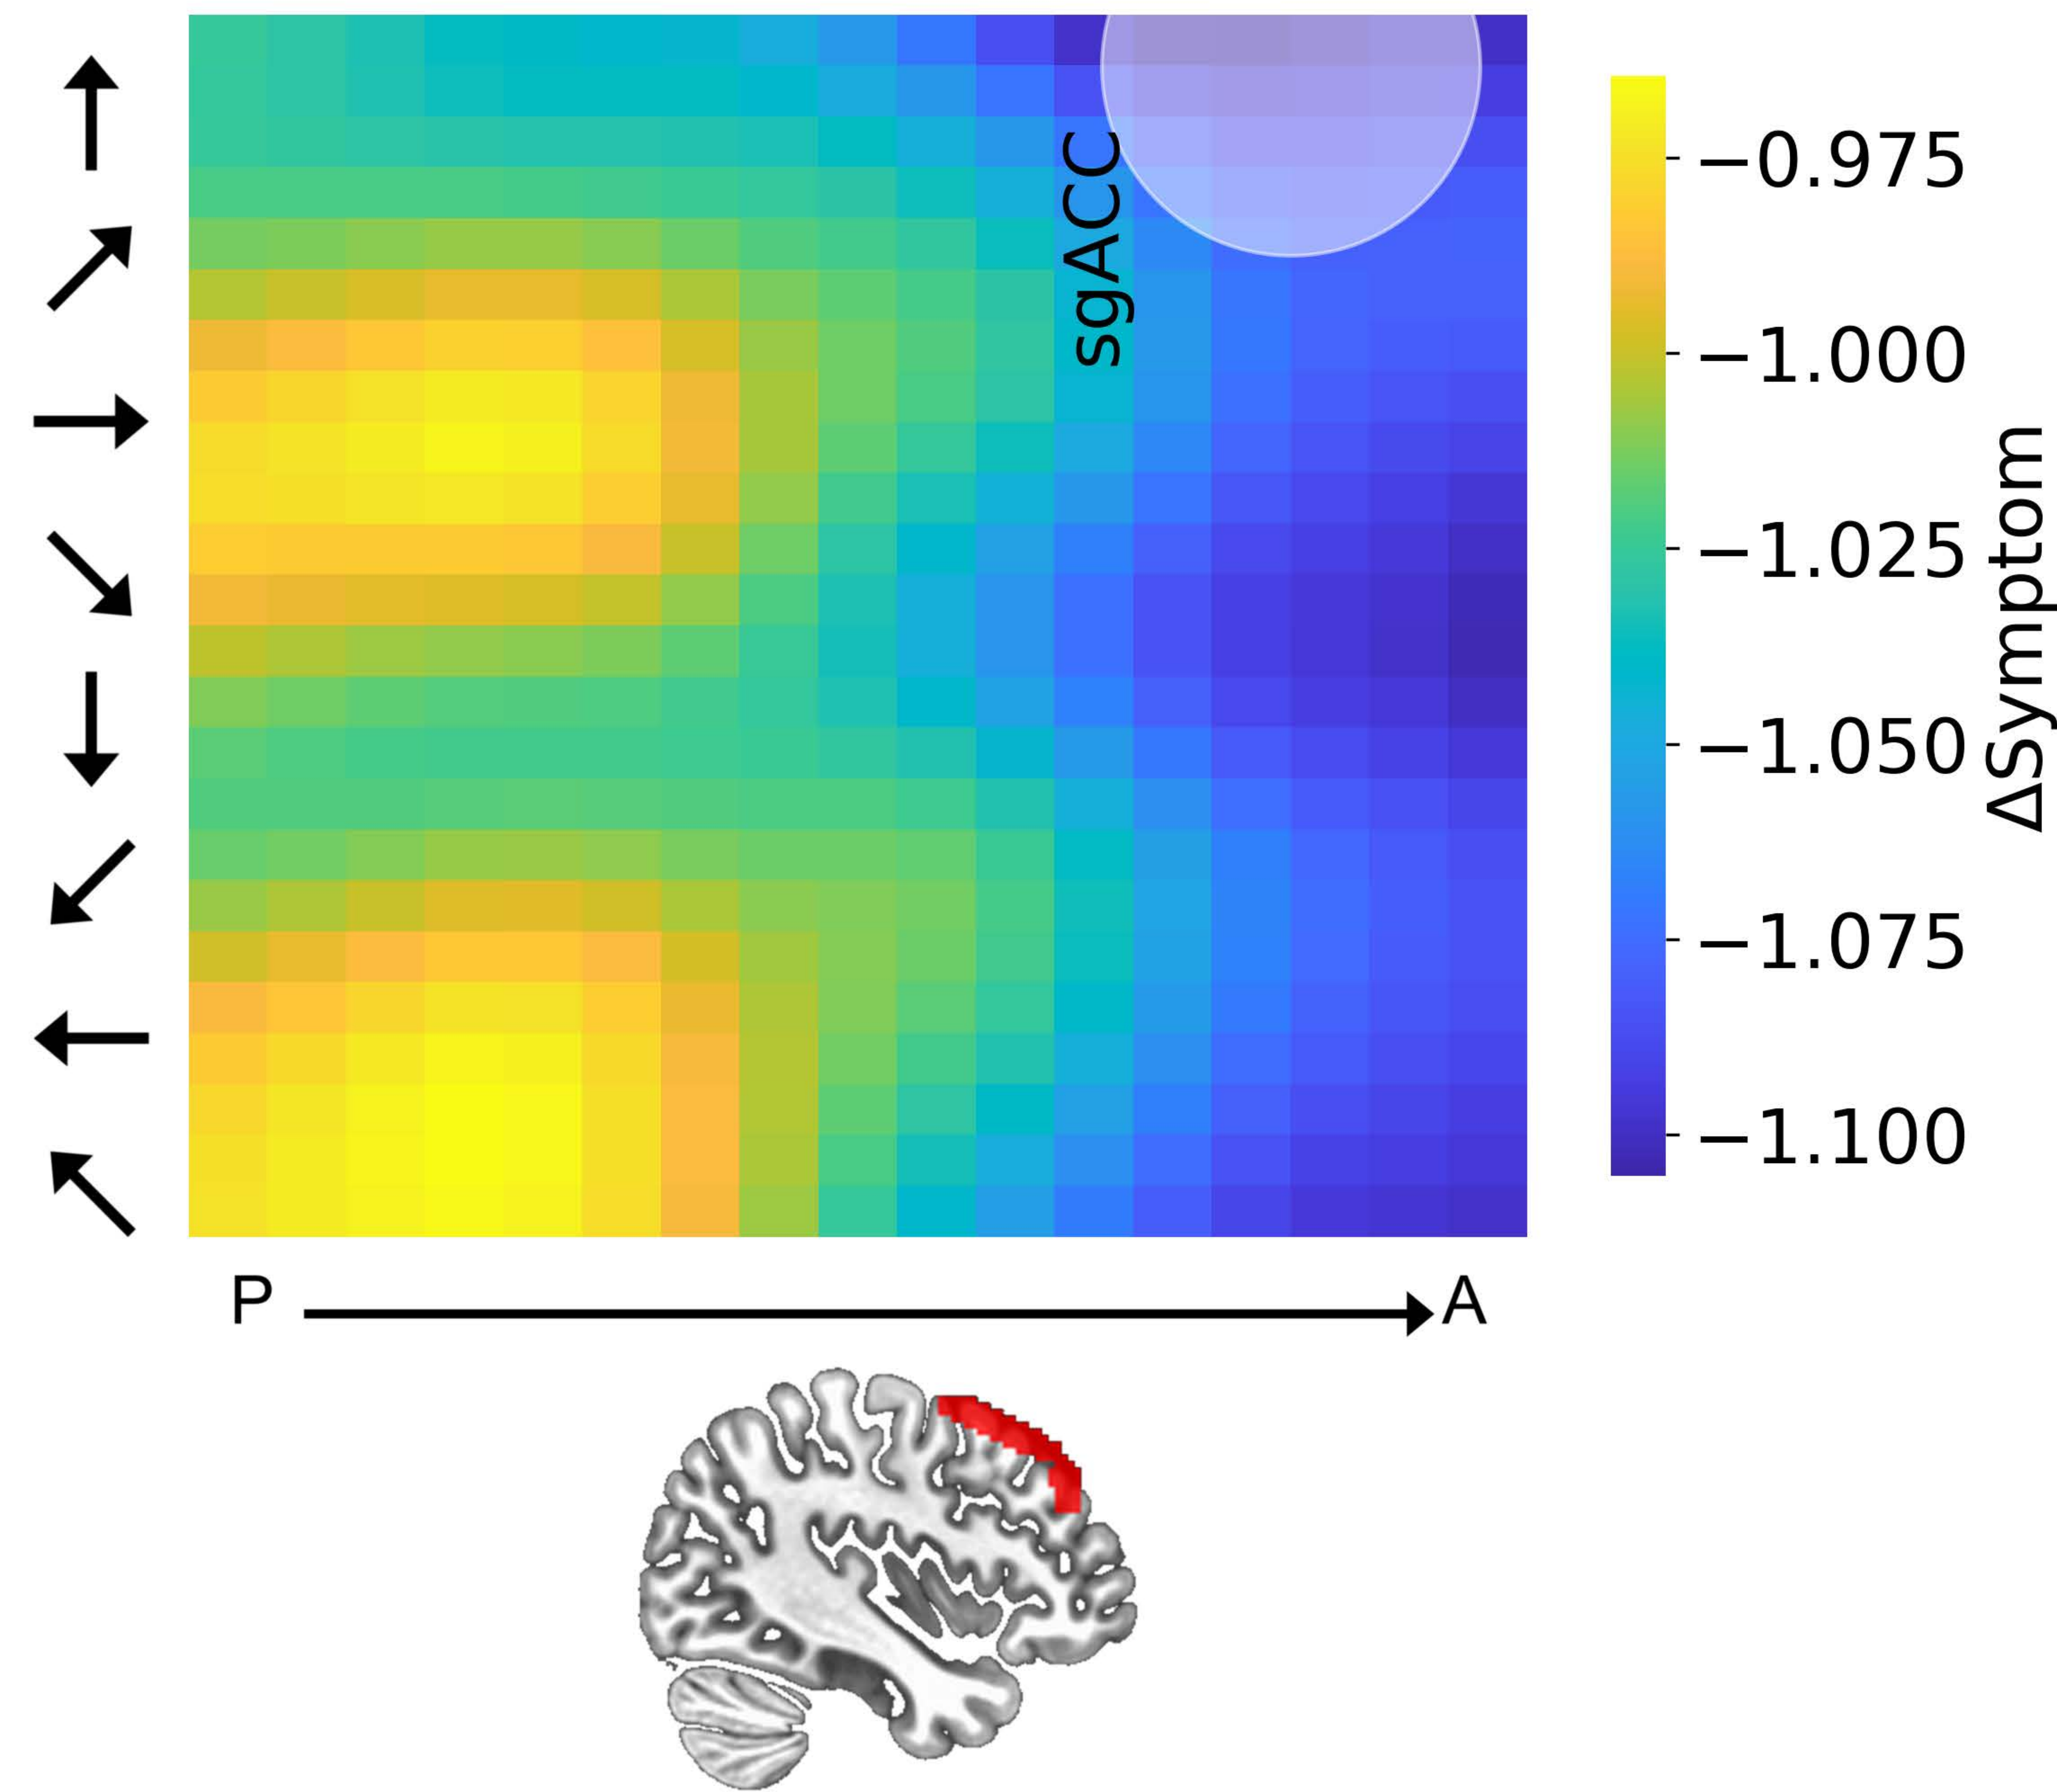



# INDARDY771TXZ\_madrs\_right\_dlpfc

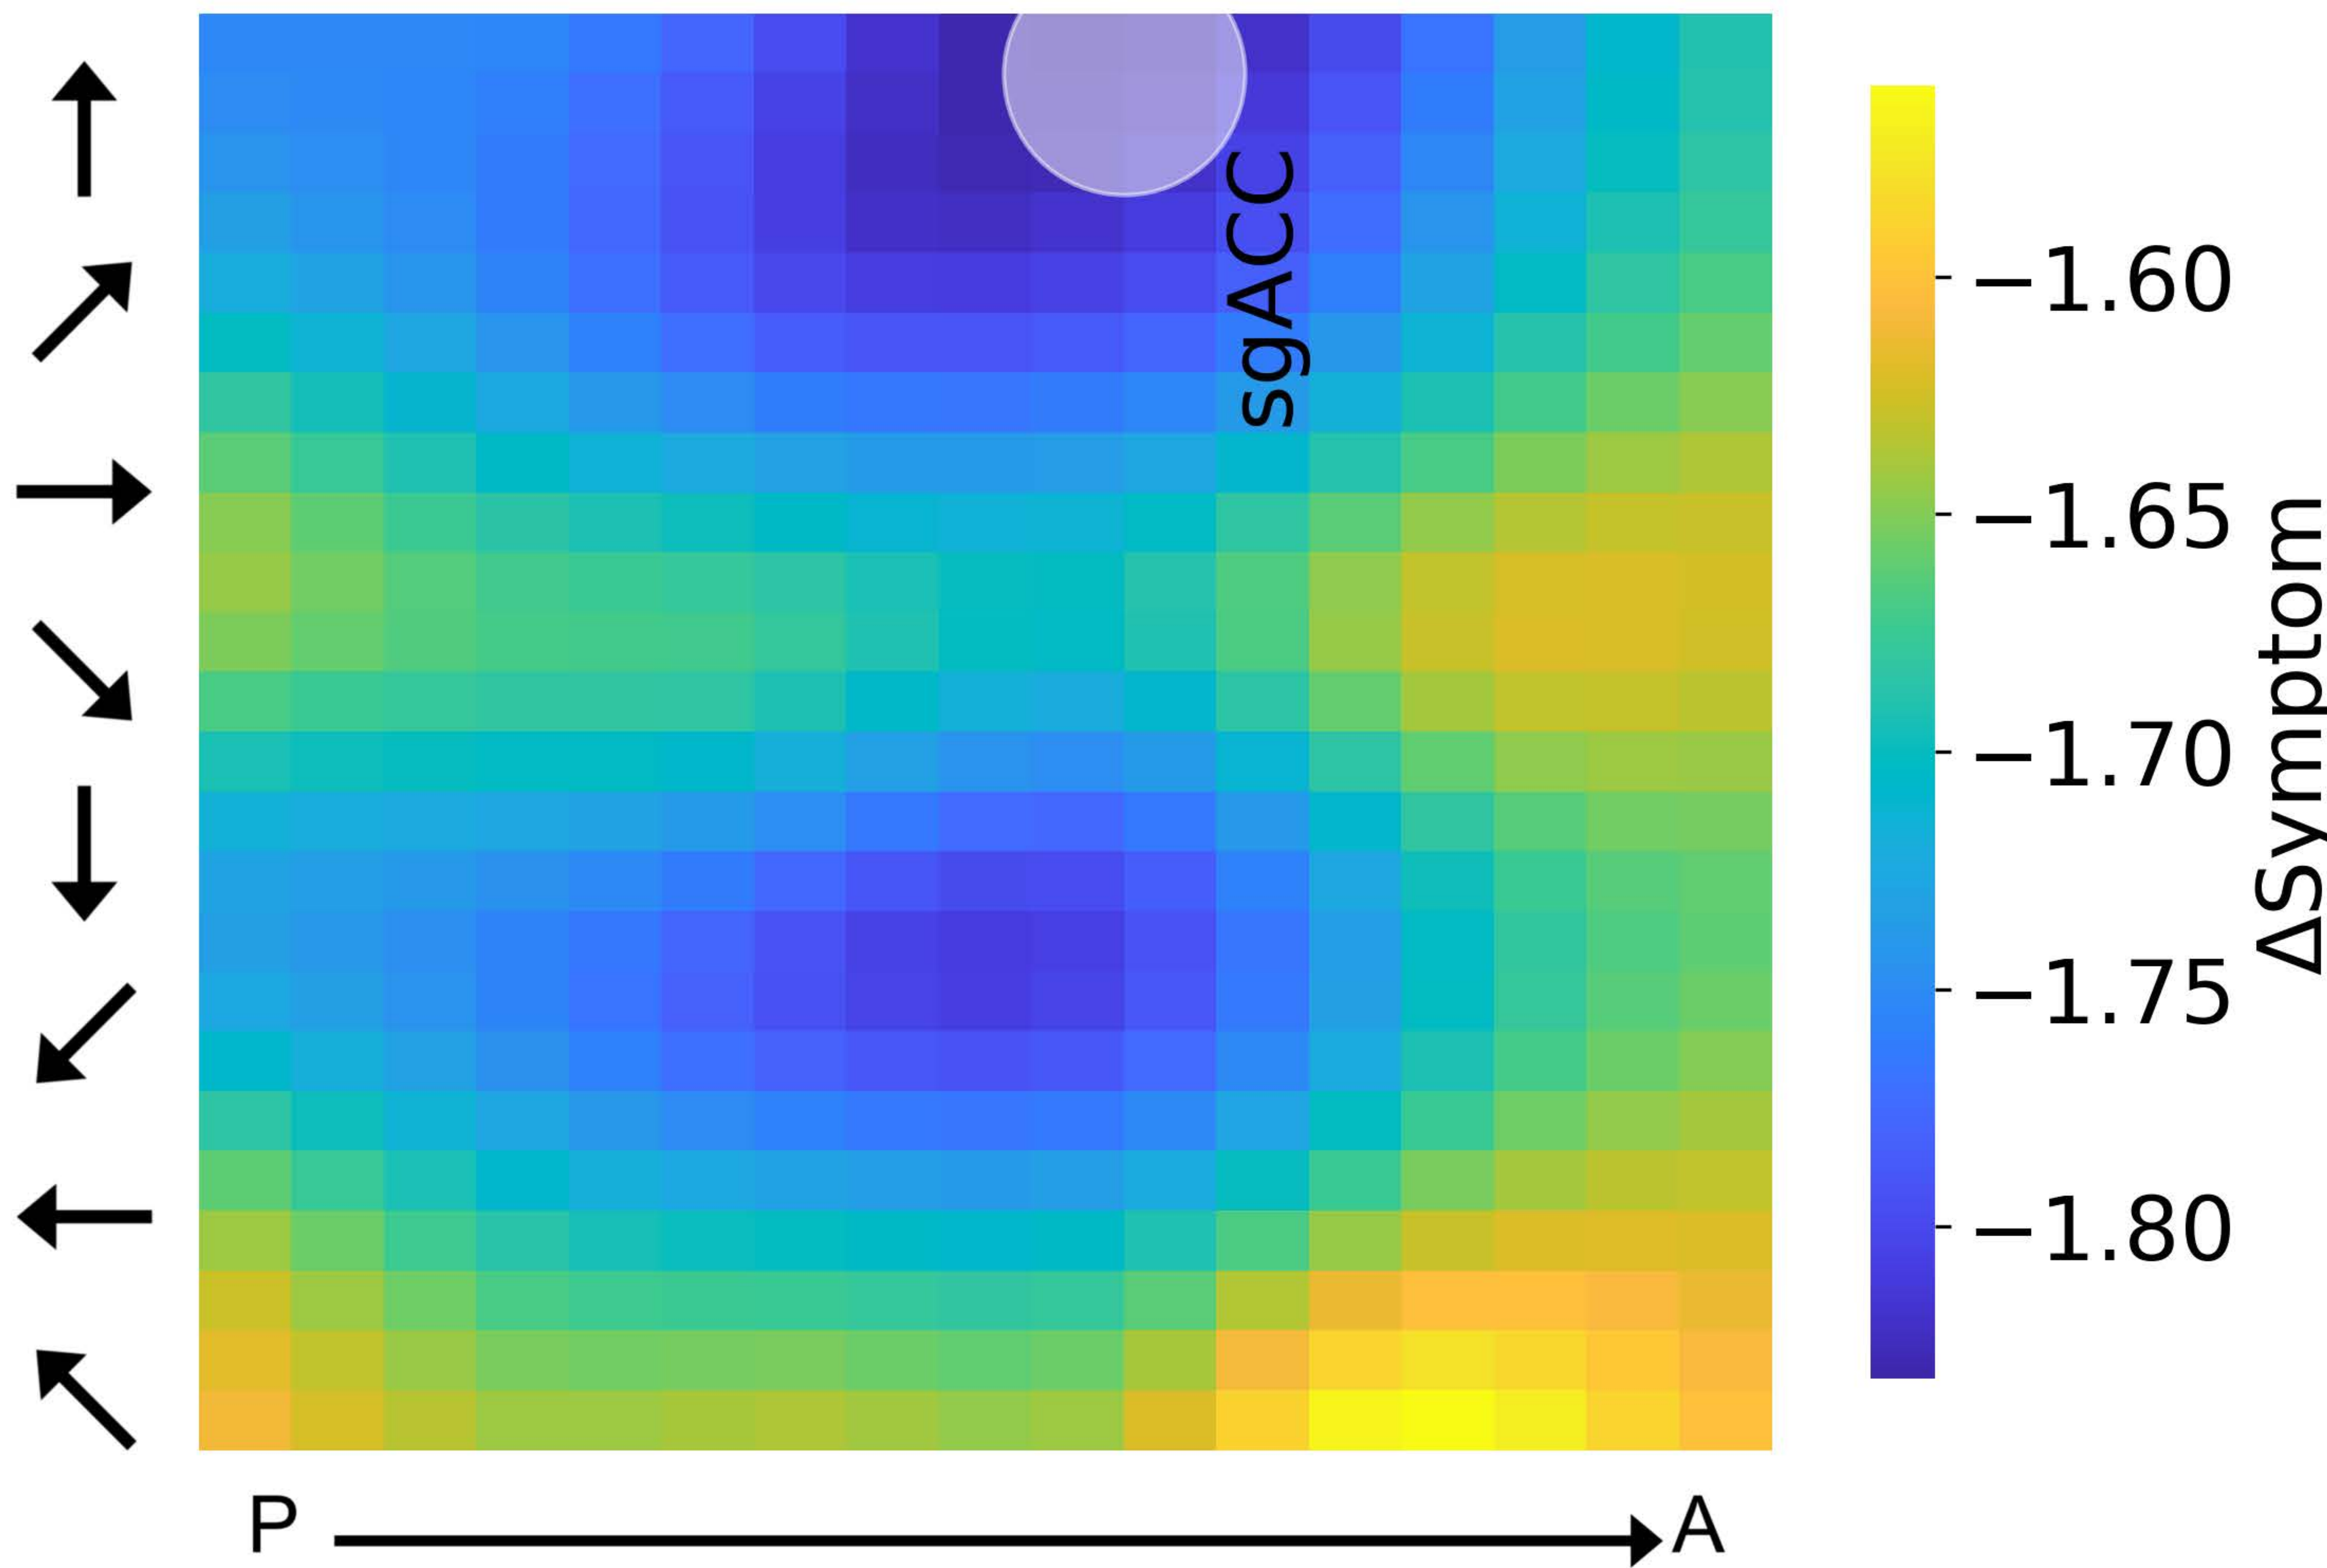



# NDAREU790BVQ\_madrs\_right\_dlpfc

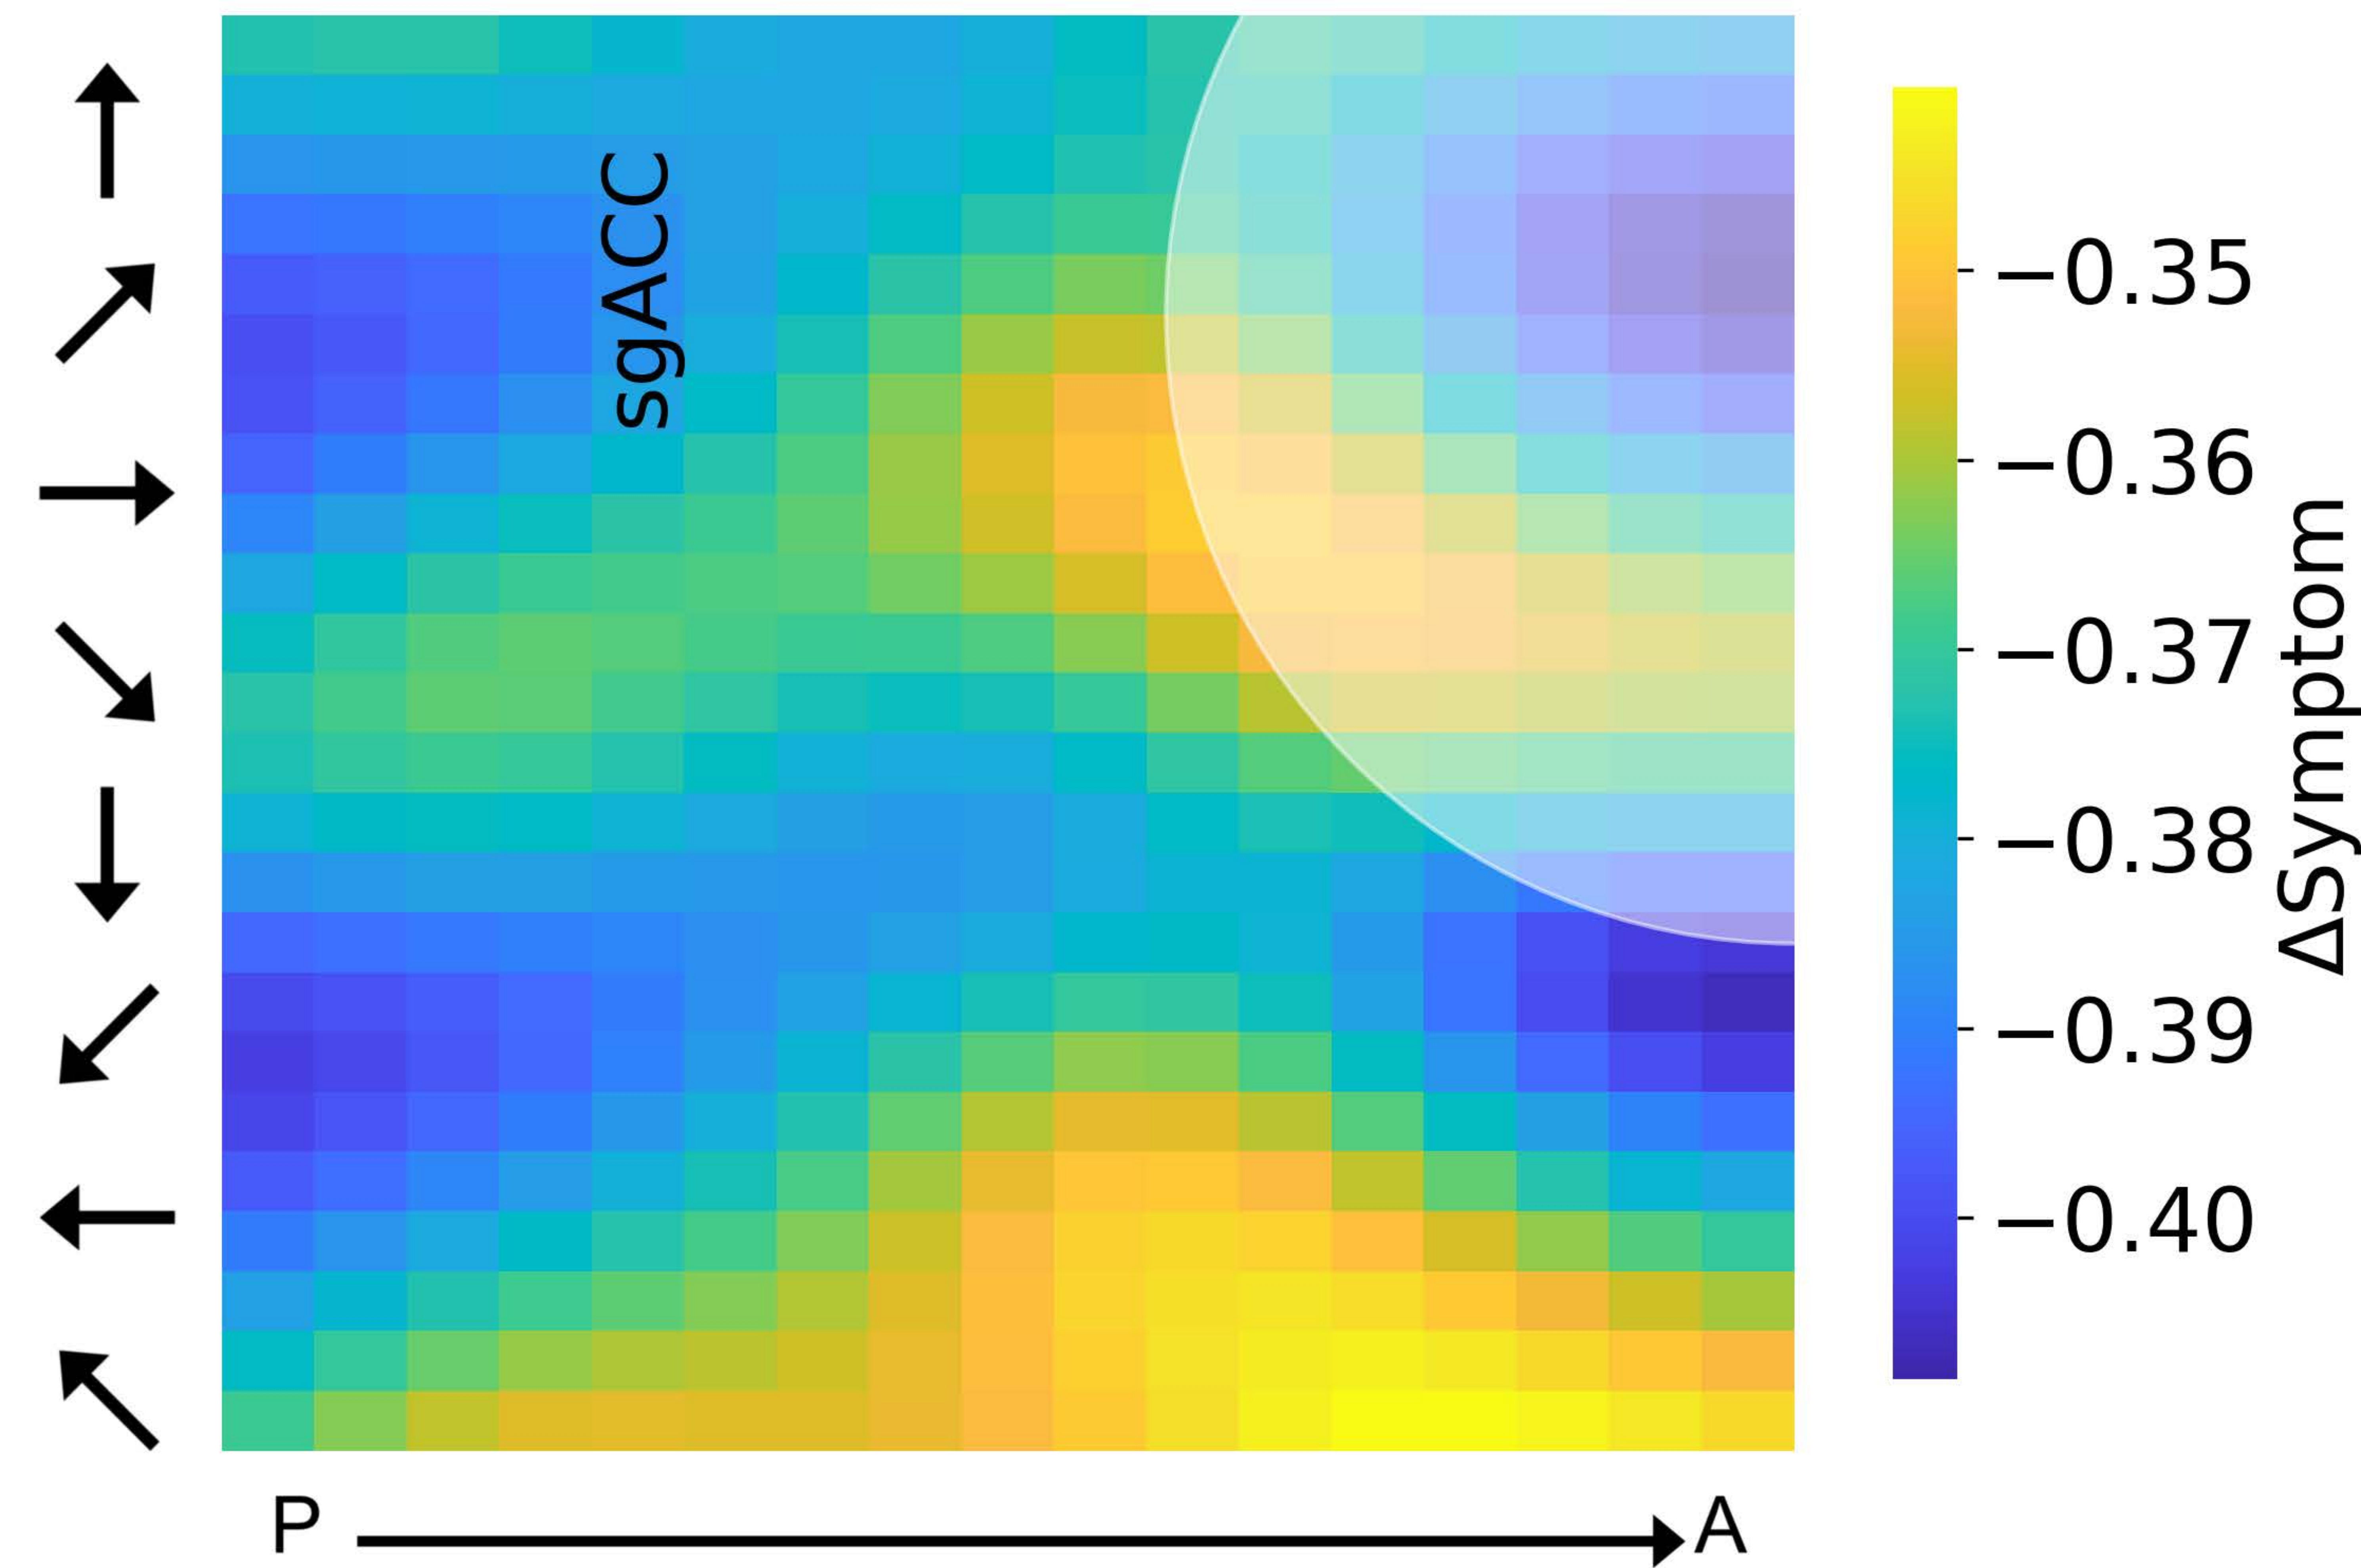



# NDARGA844BF5\_madrs\_right\_dlpfc

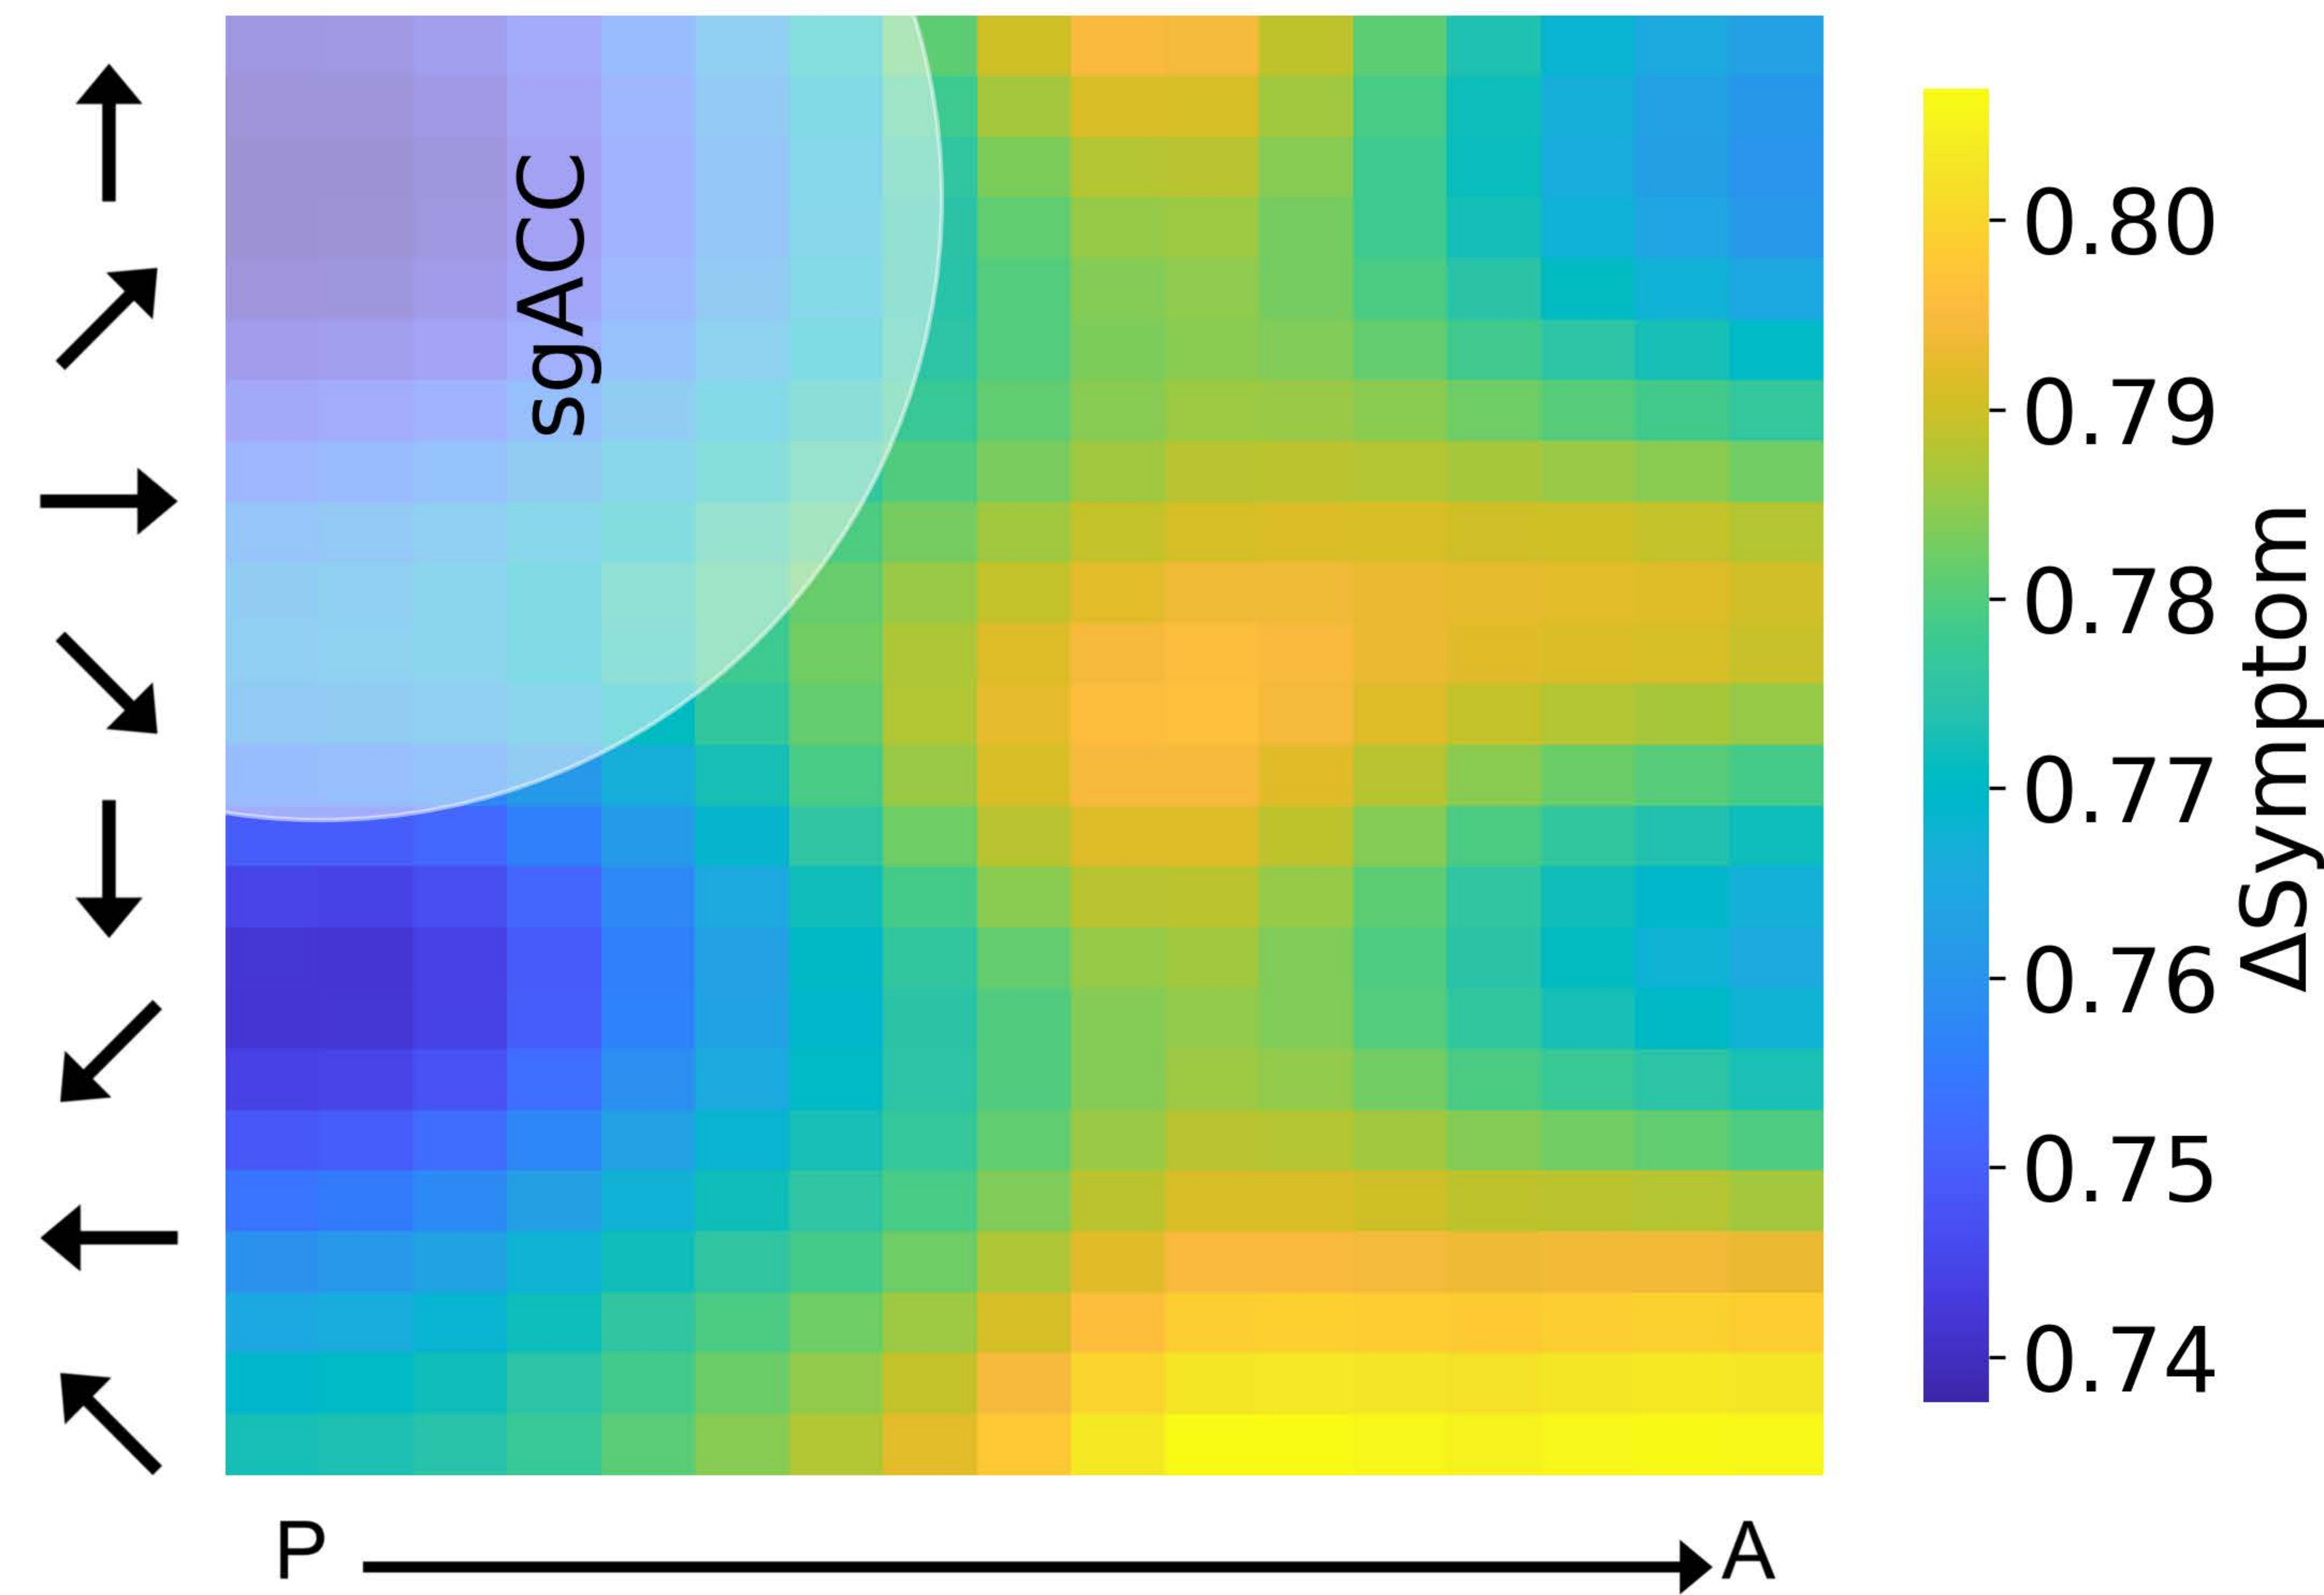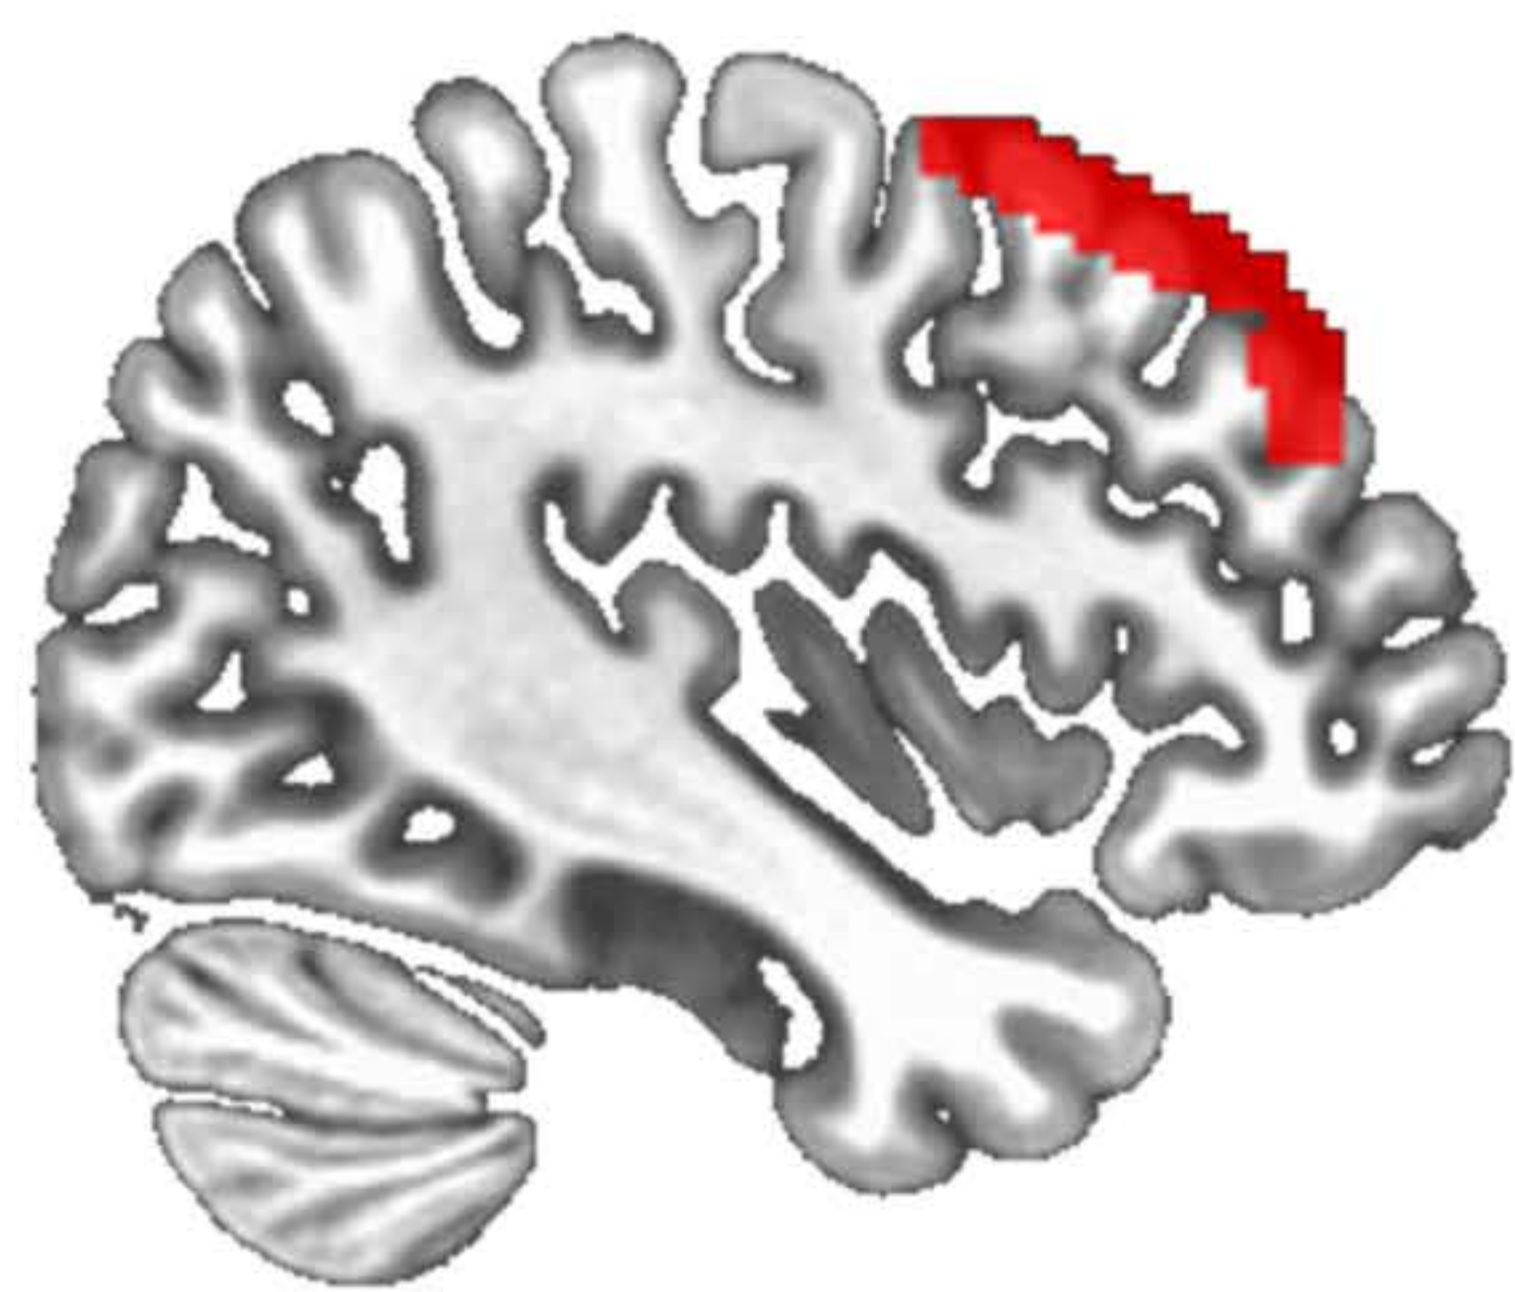



# NDARGN596ENP\_madrs\_right\_dlpfc

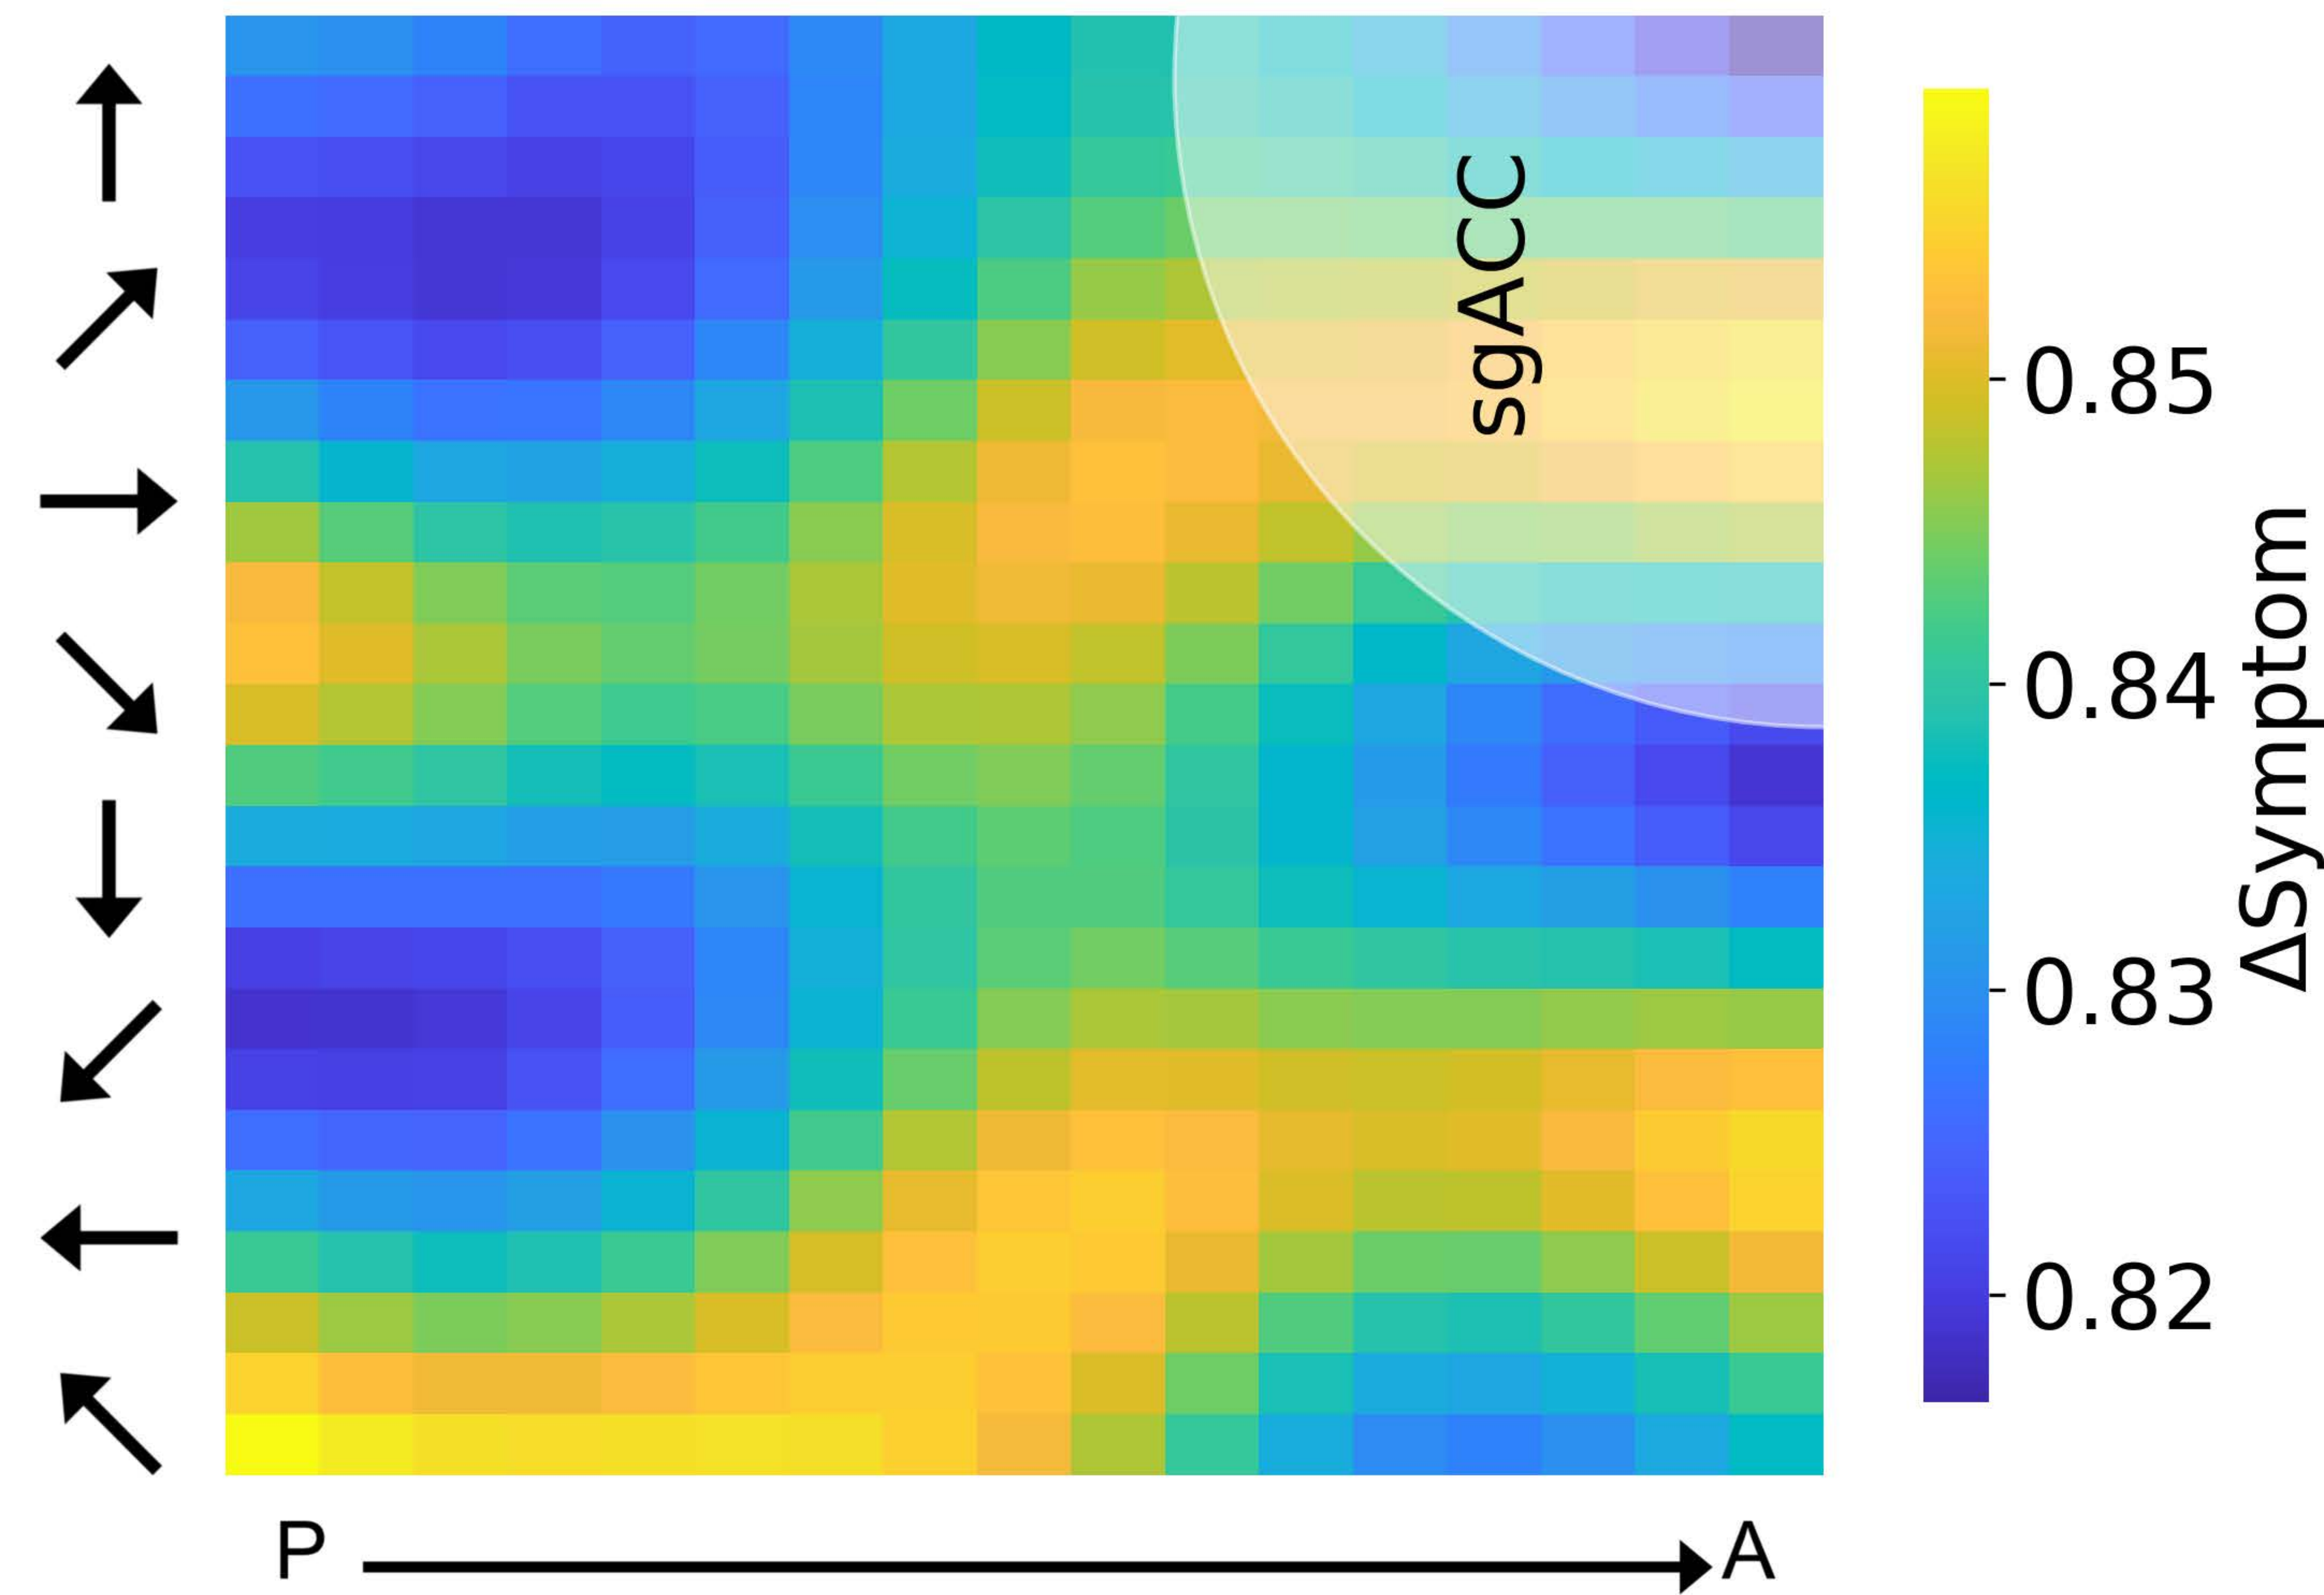



# NDARHU677DFF\_madrs\_right\_dlpfc

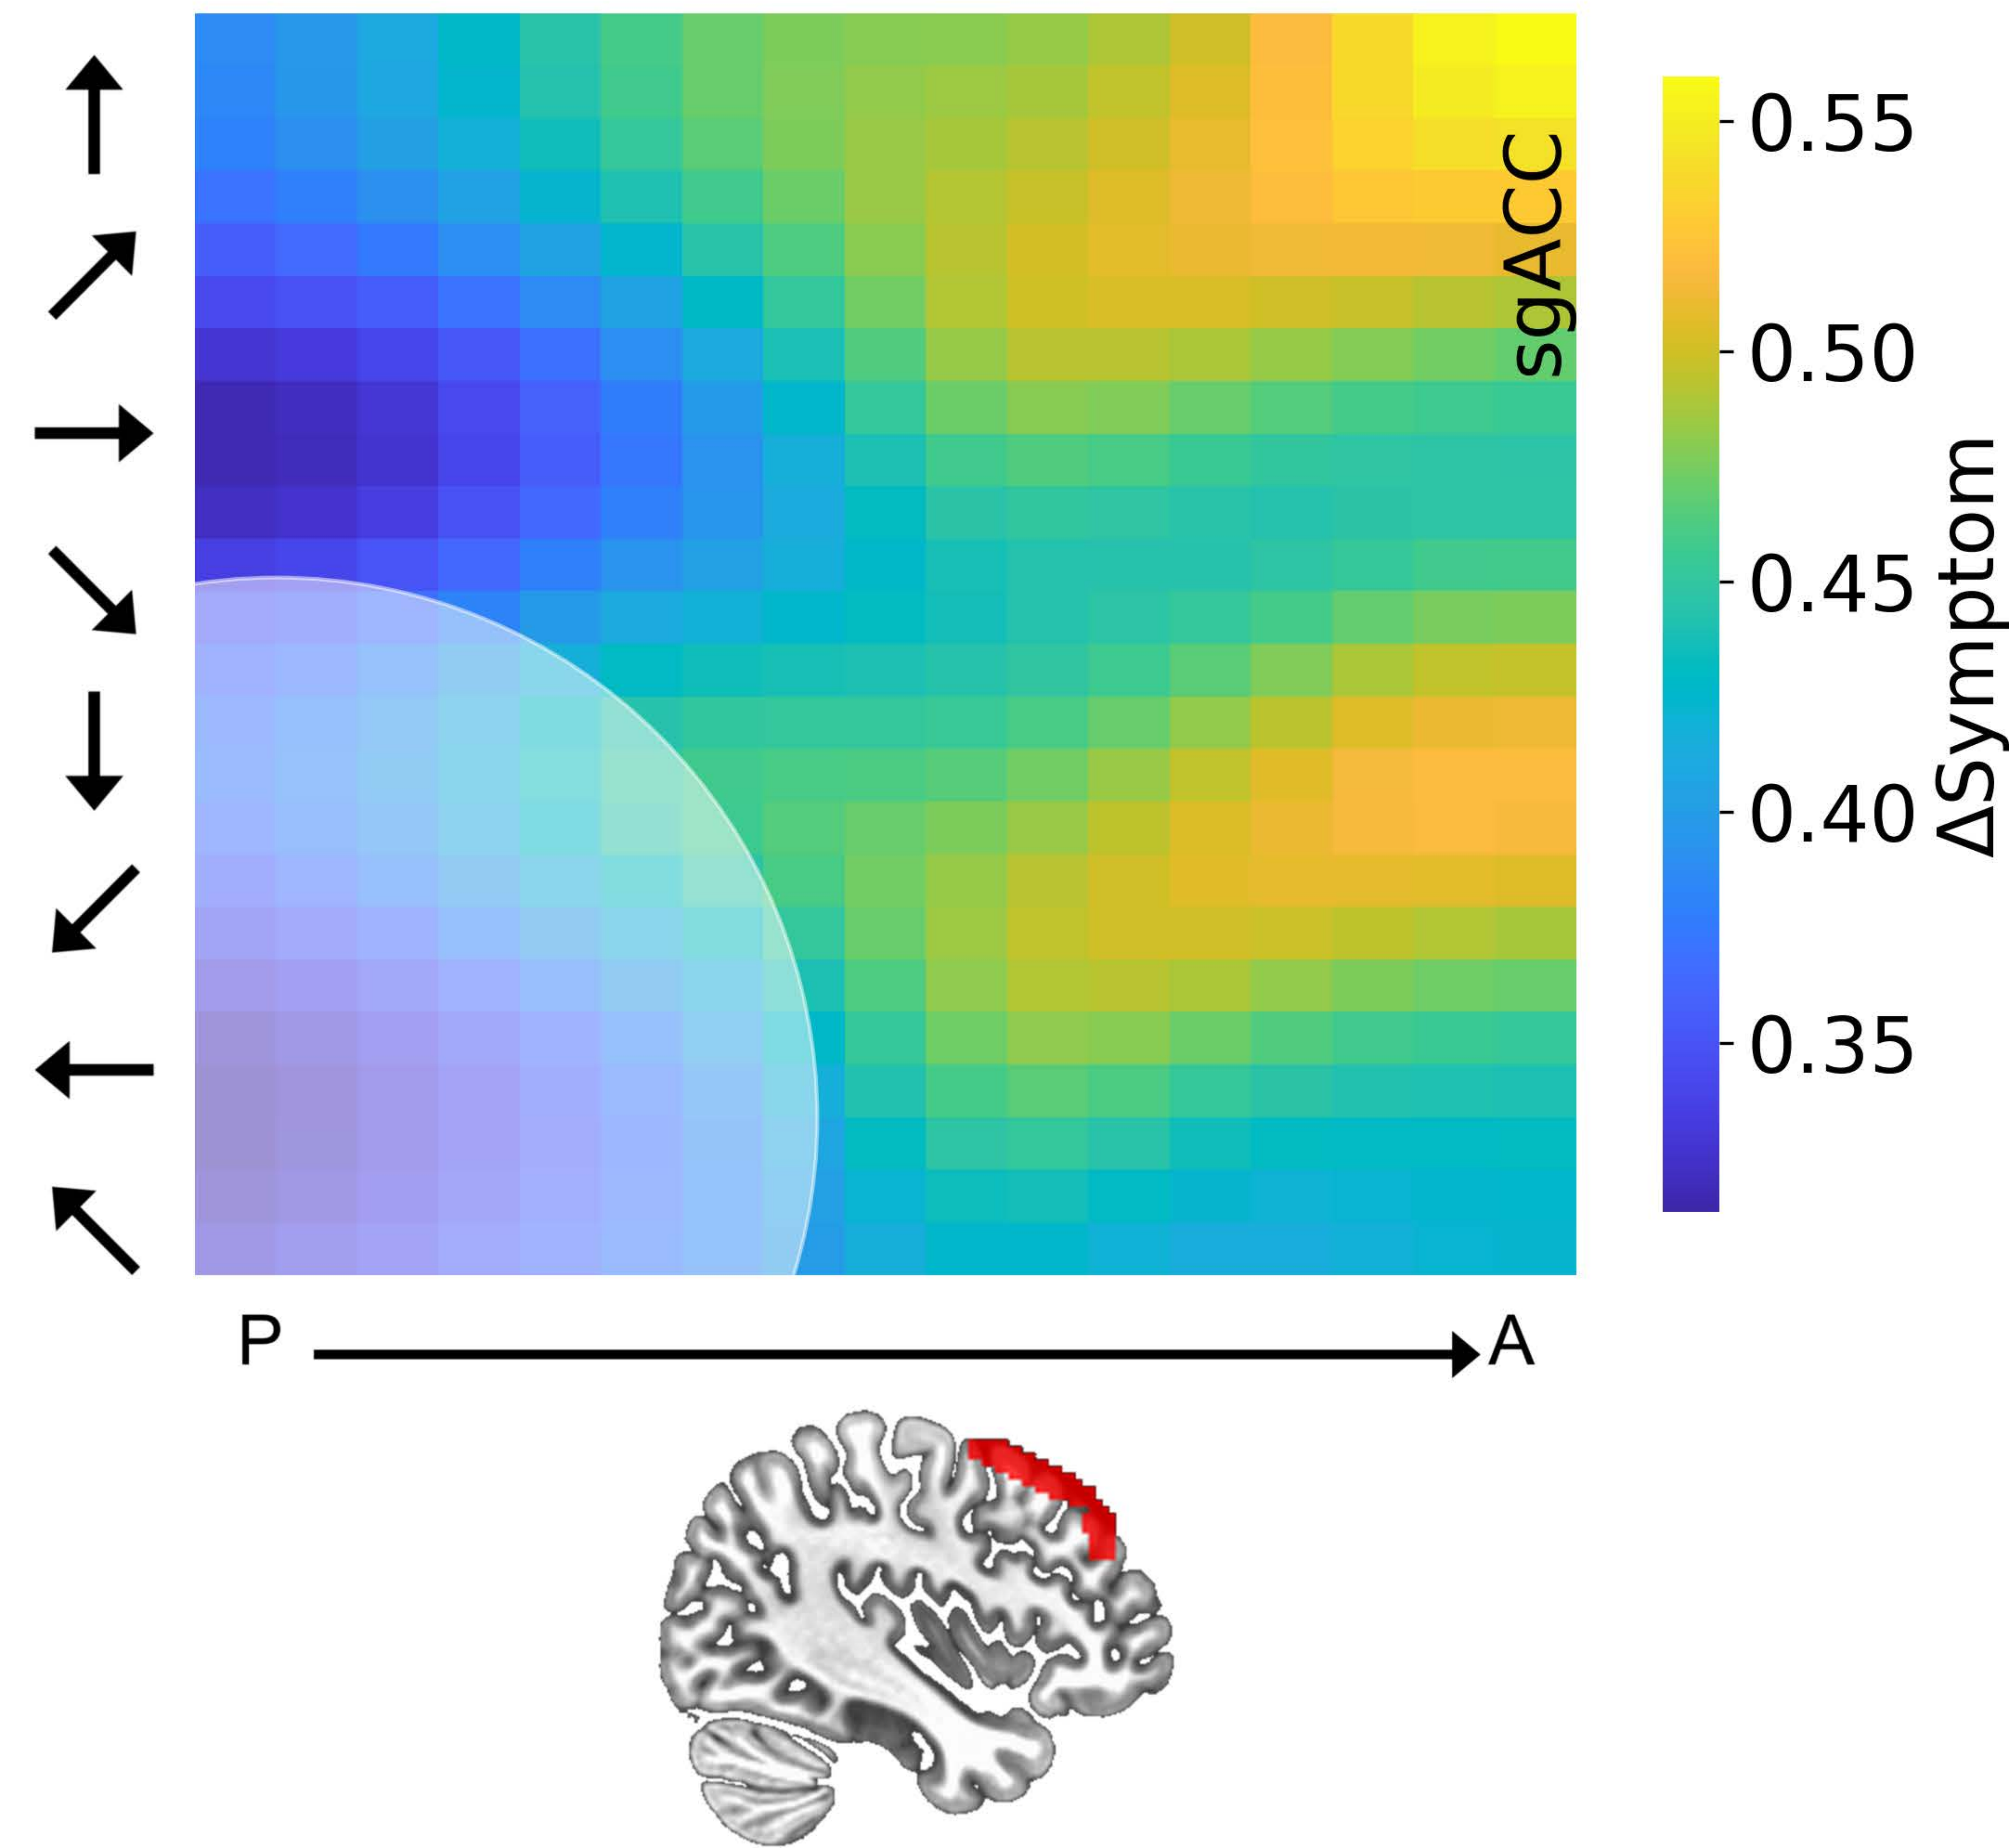



# NDARJL083WMP\_madrs\_right\_dlpfc

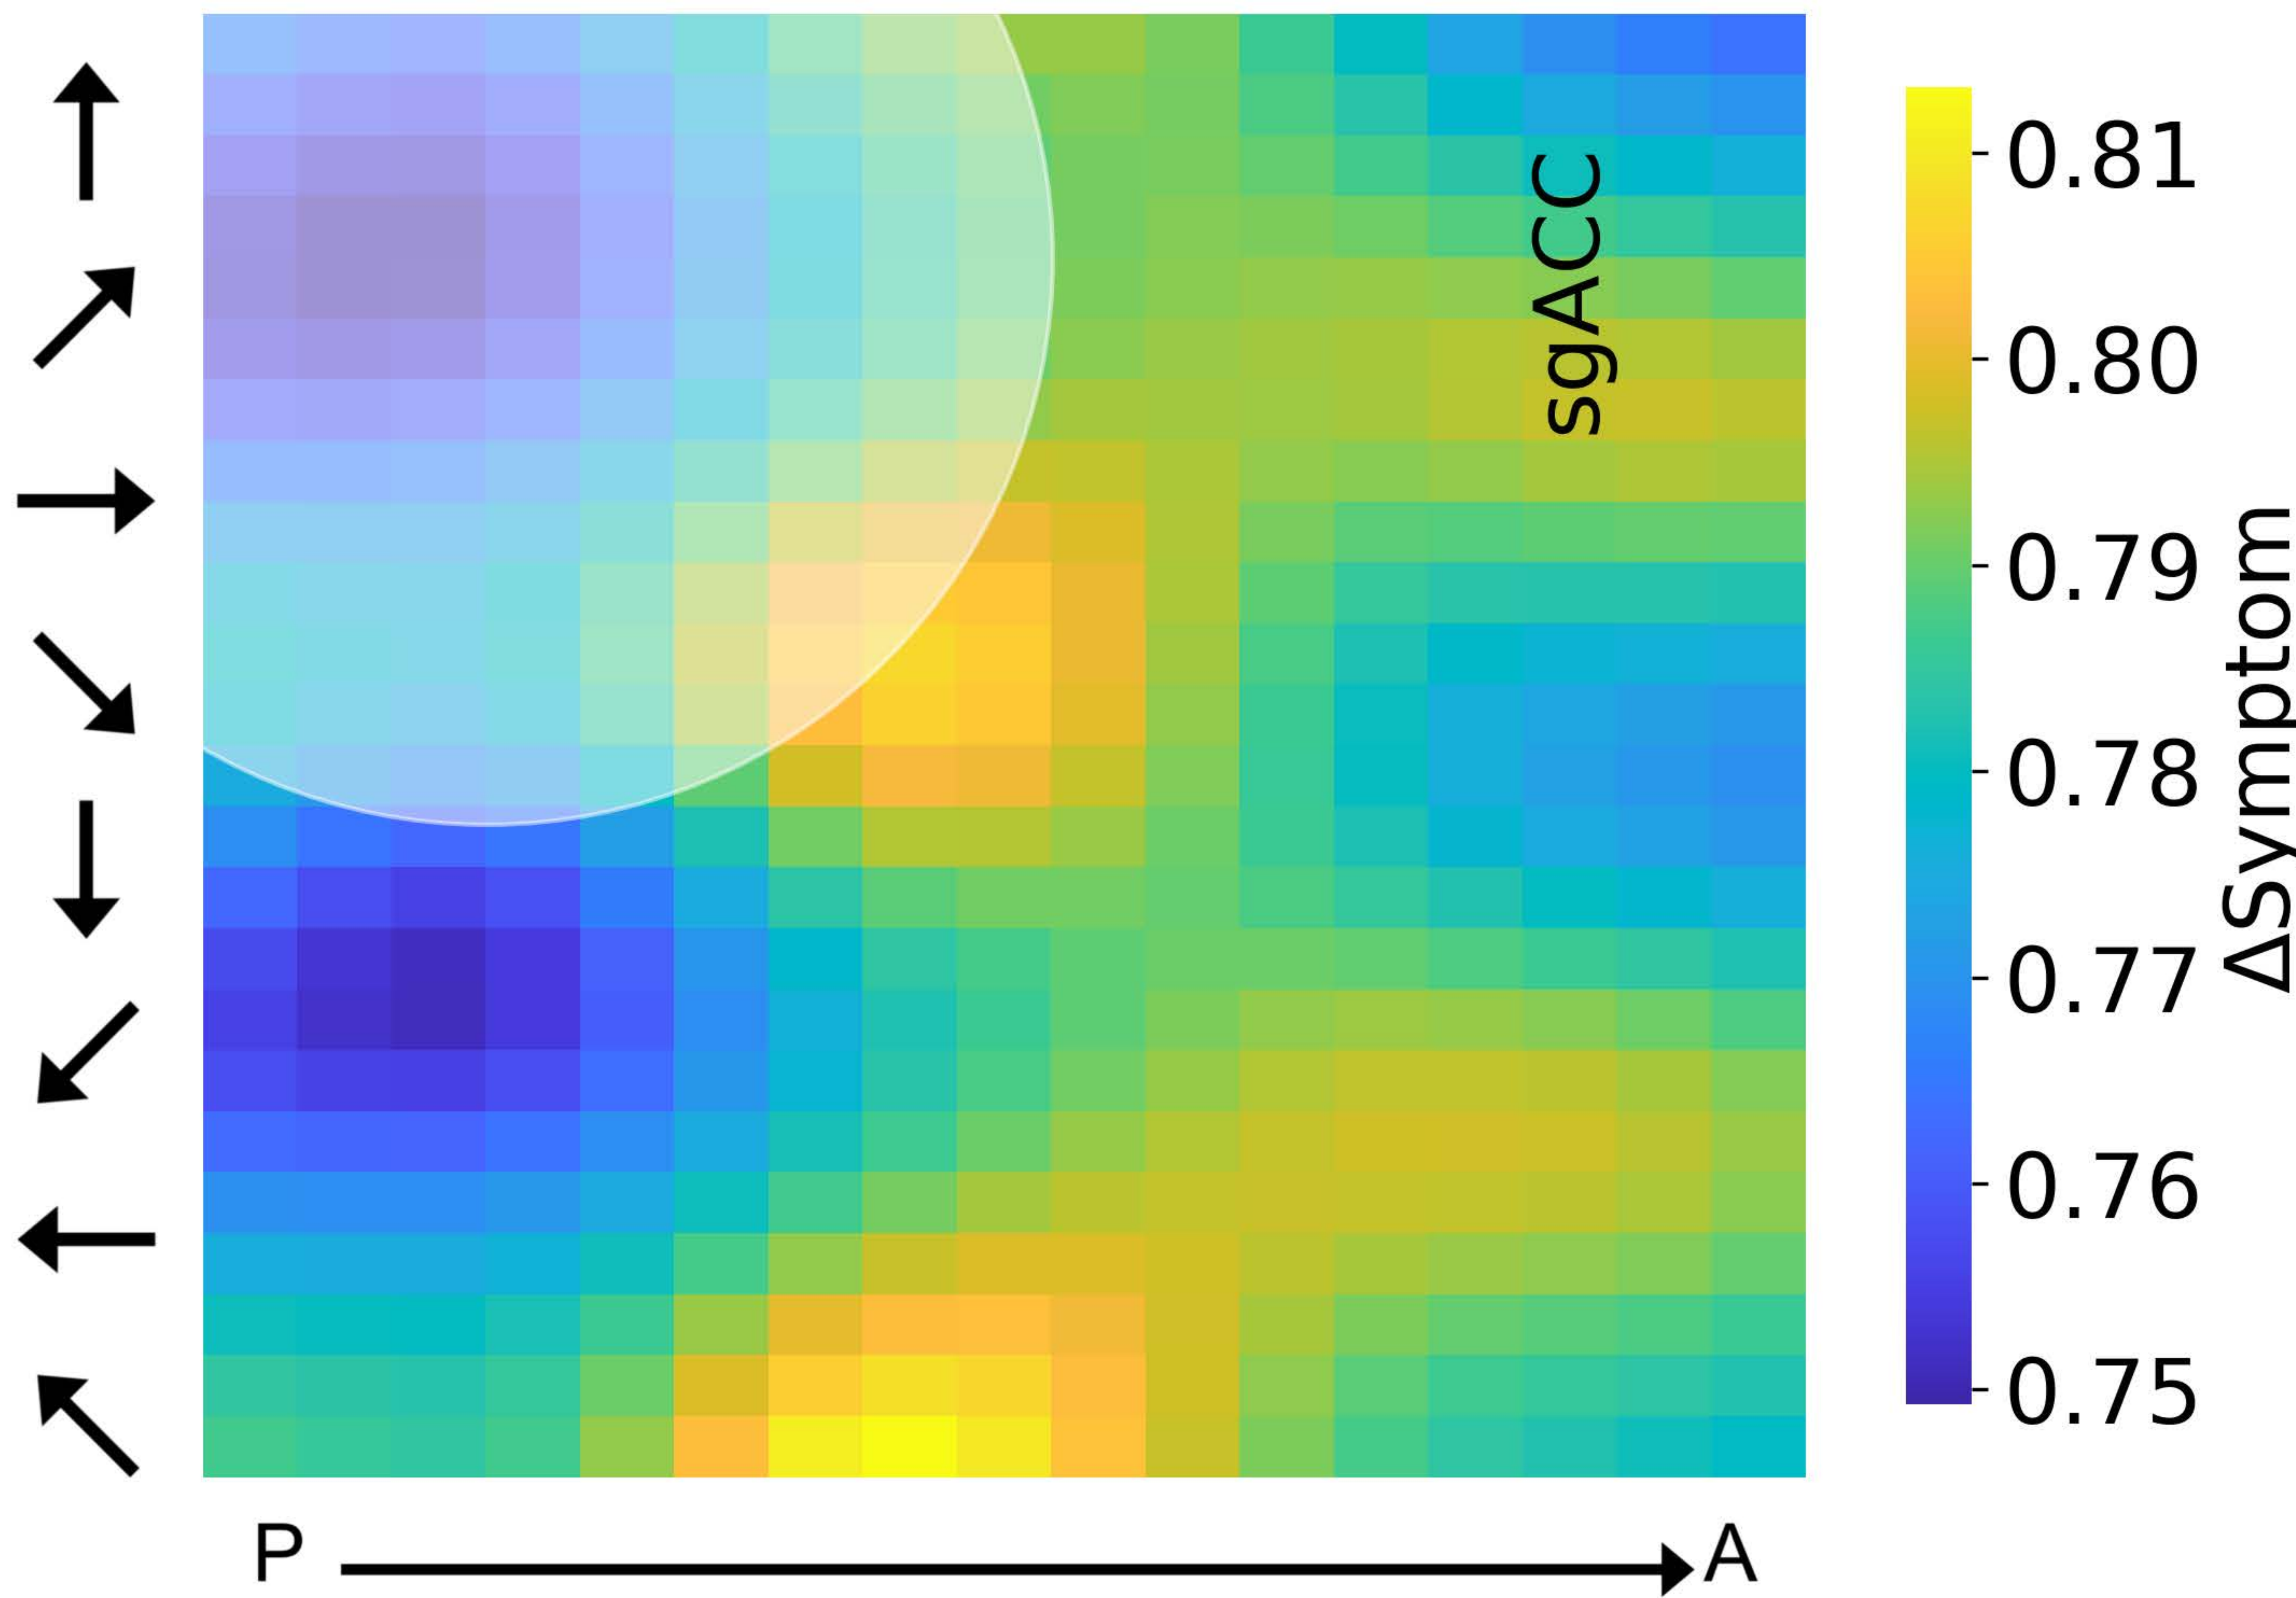



# NDARKR291PWN\_madr\_right\_dlpfc

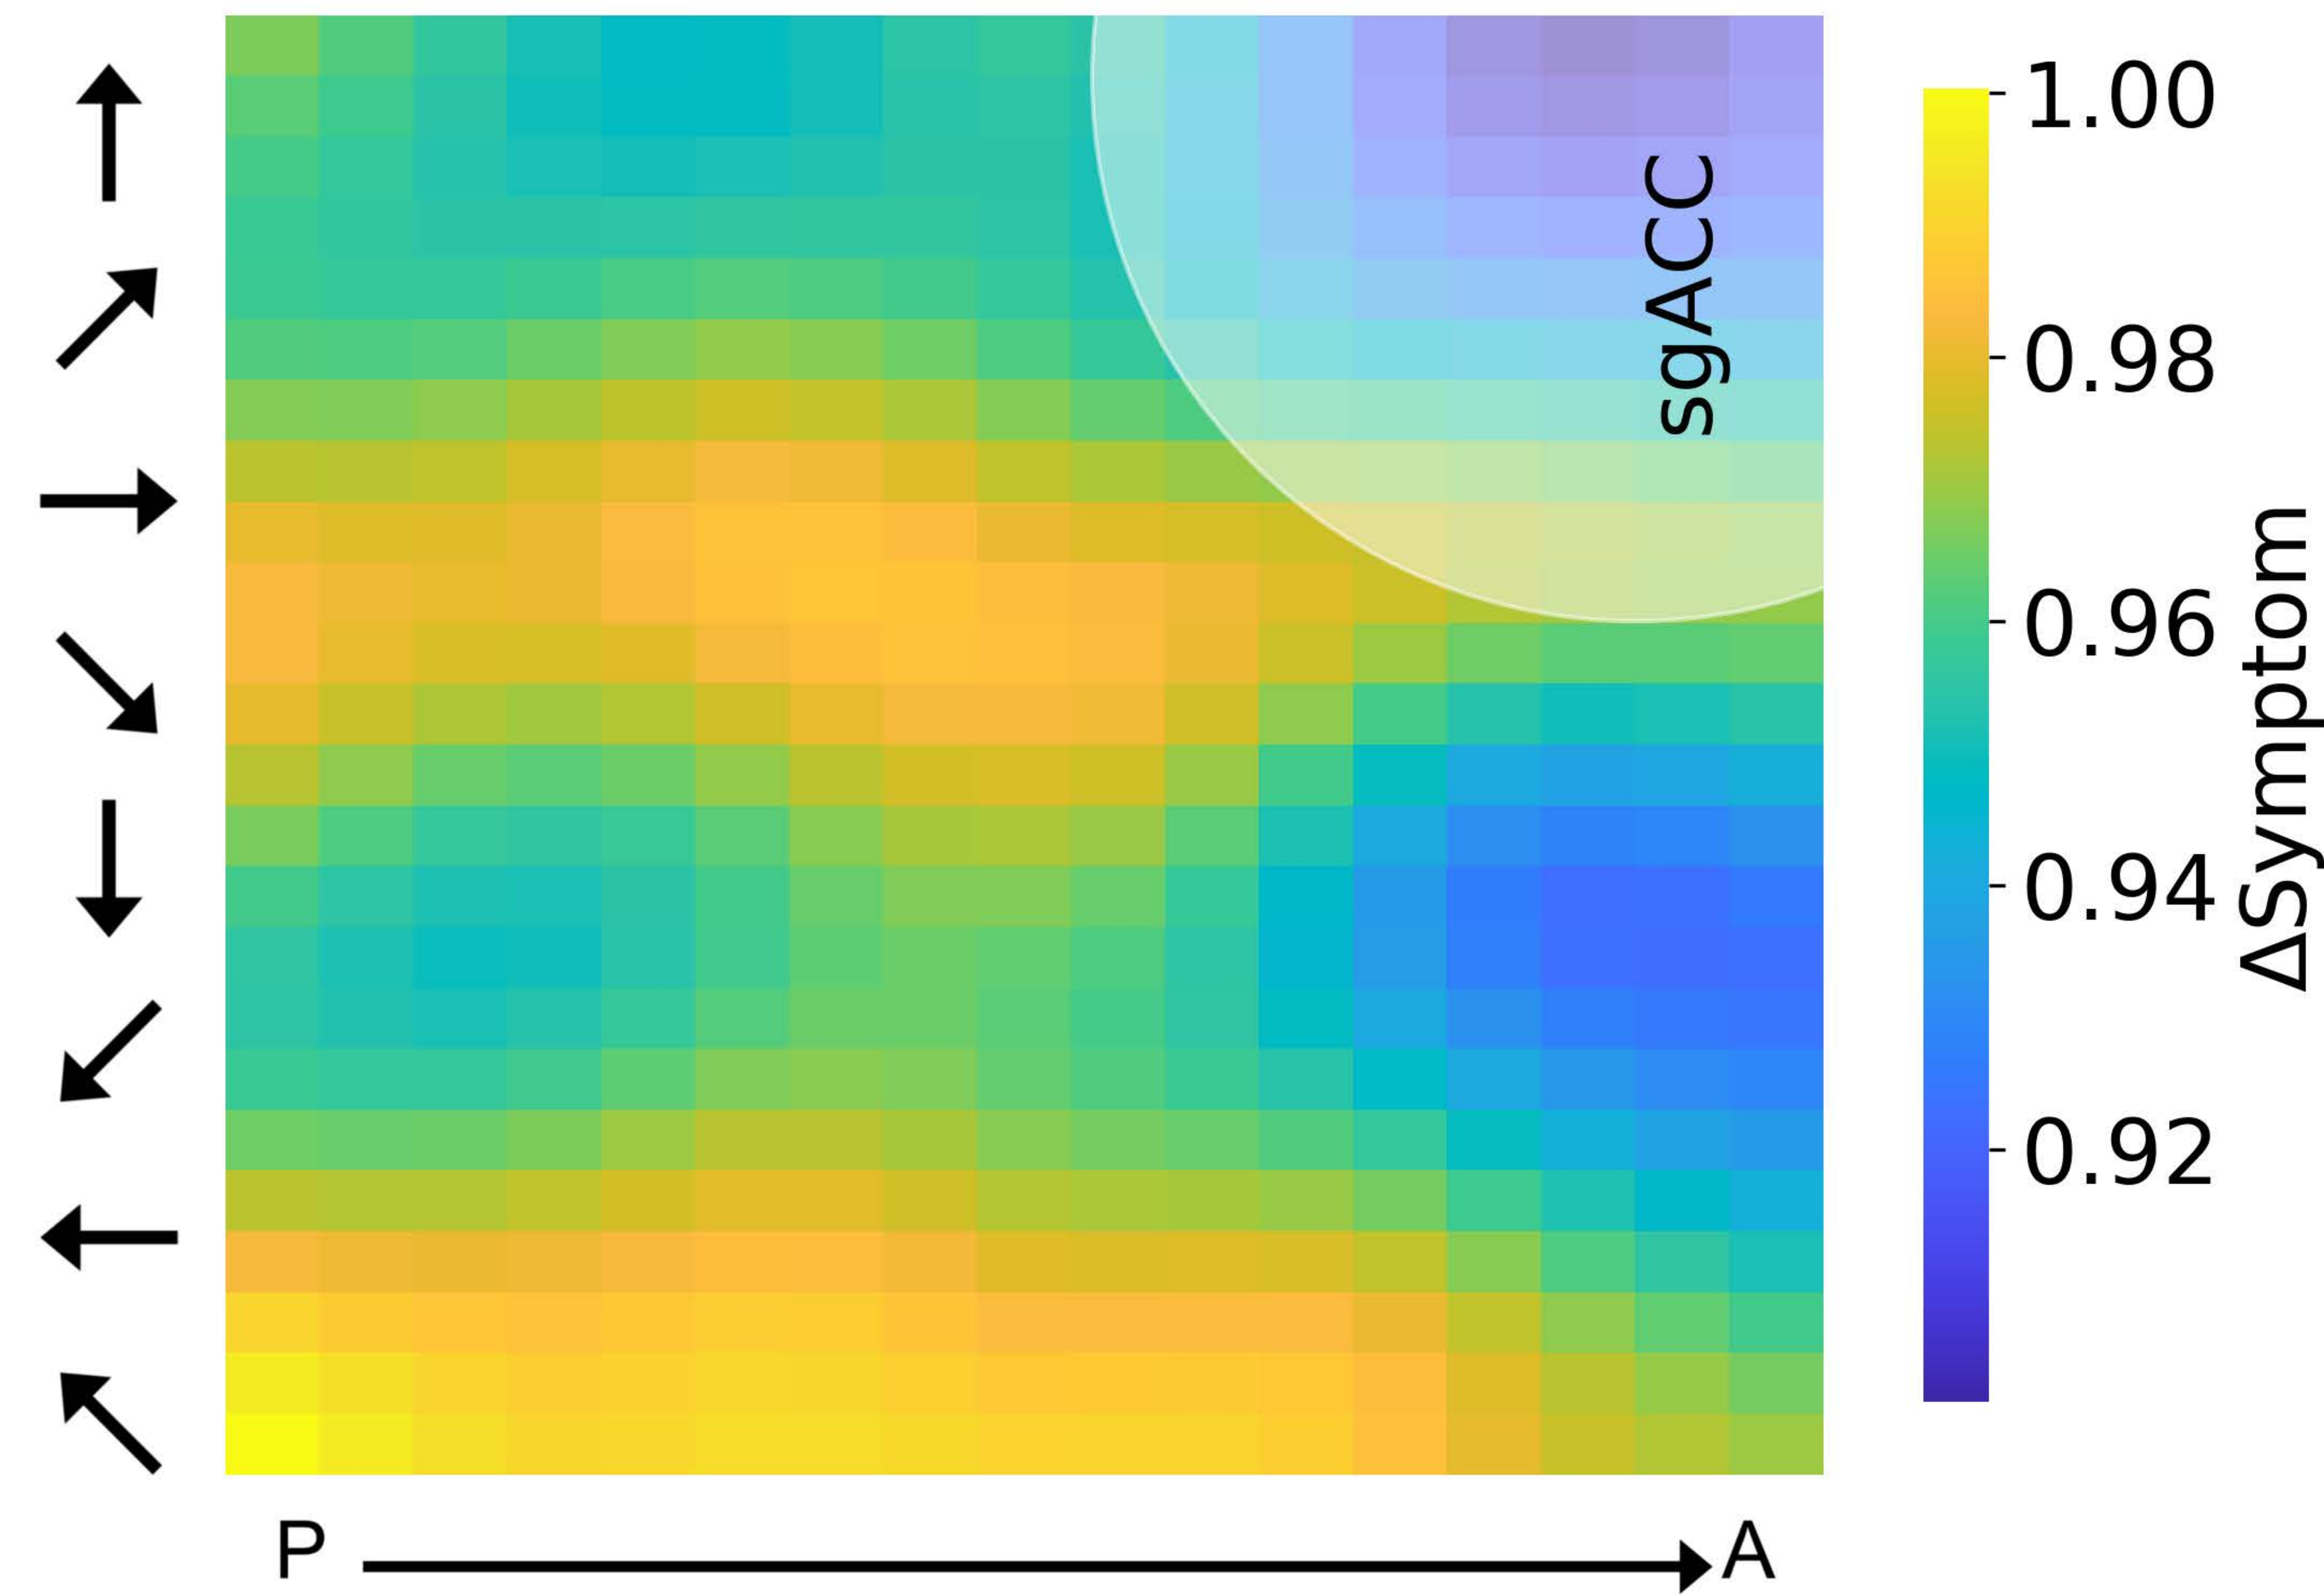



# NDARLH479MBF\_madrs\_right\_dlpfc

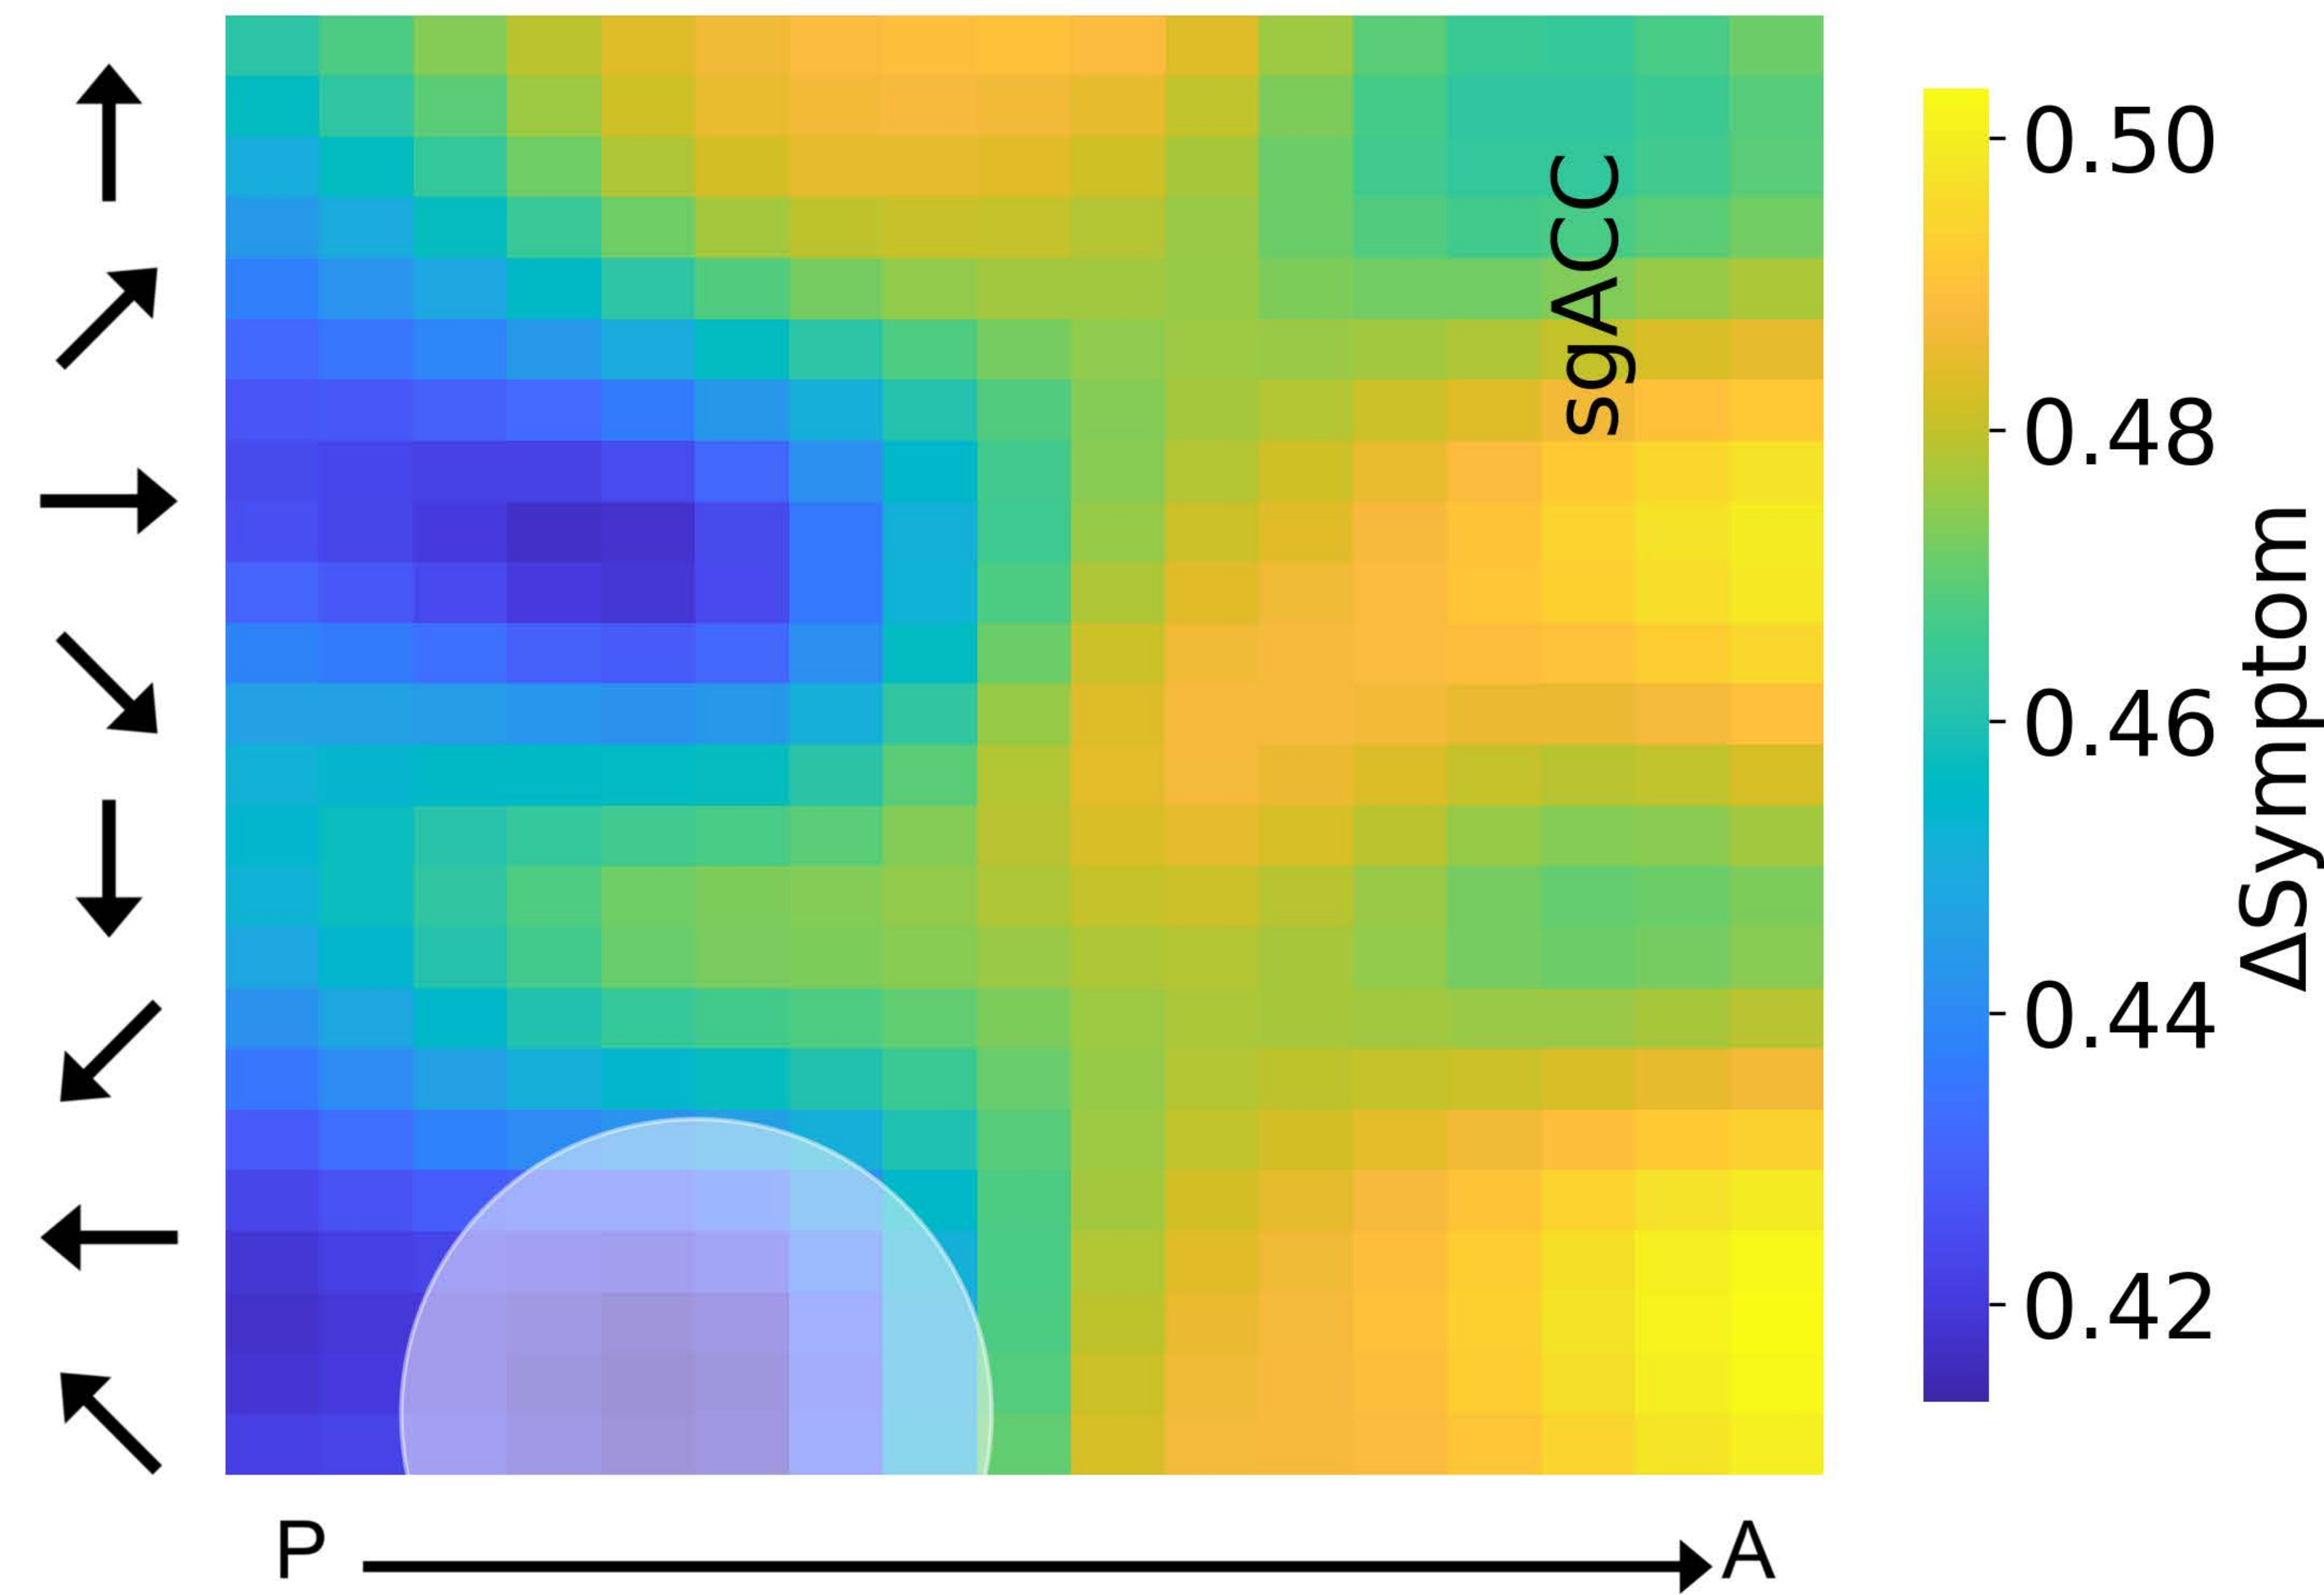



# NDARME497RF8\_madrs\_right\_dlpfc

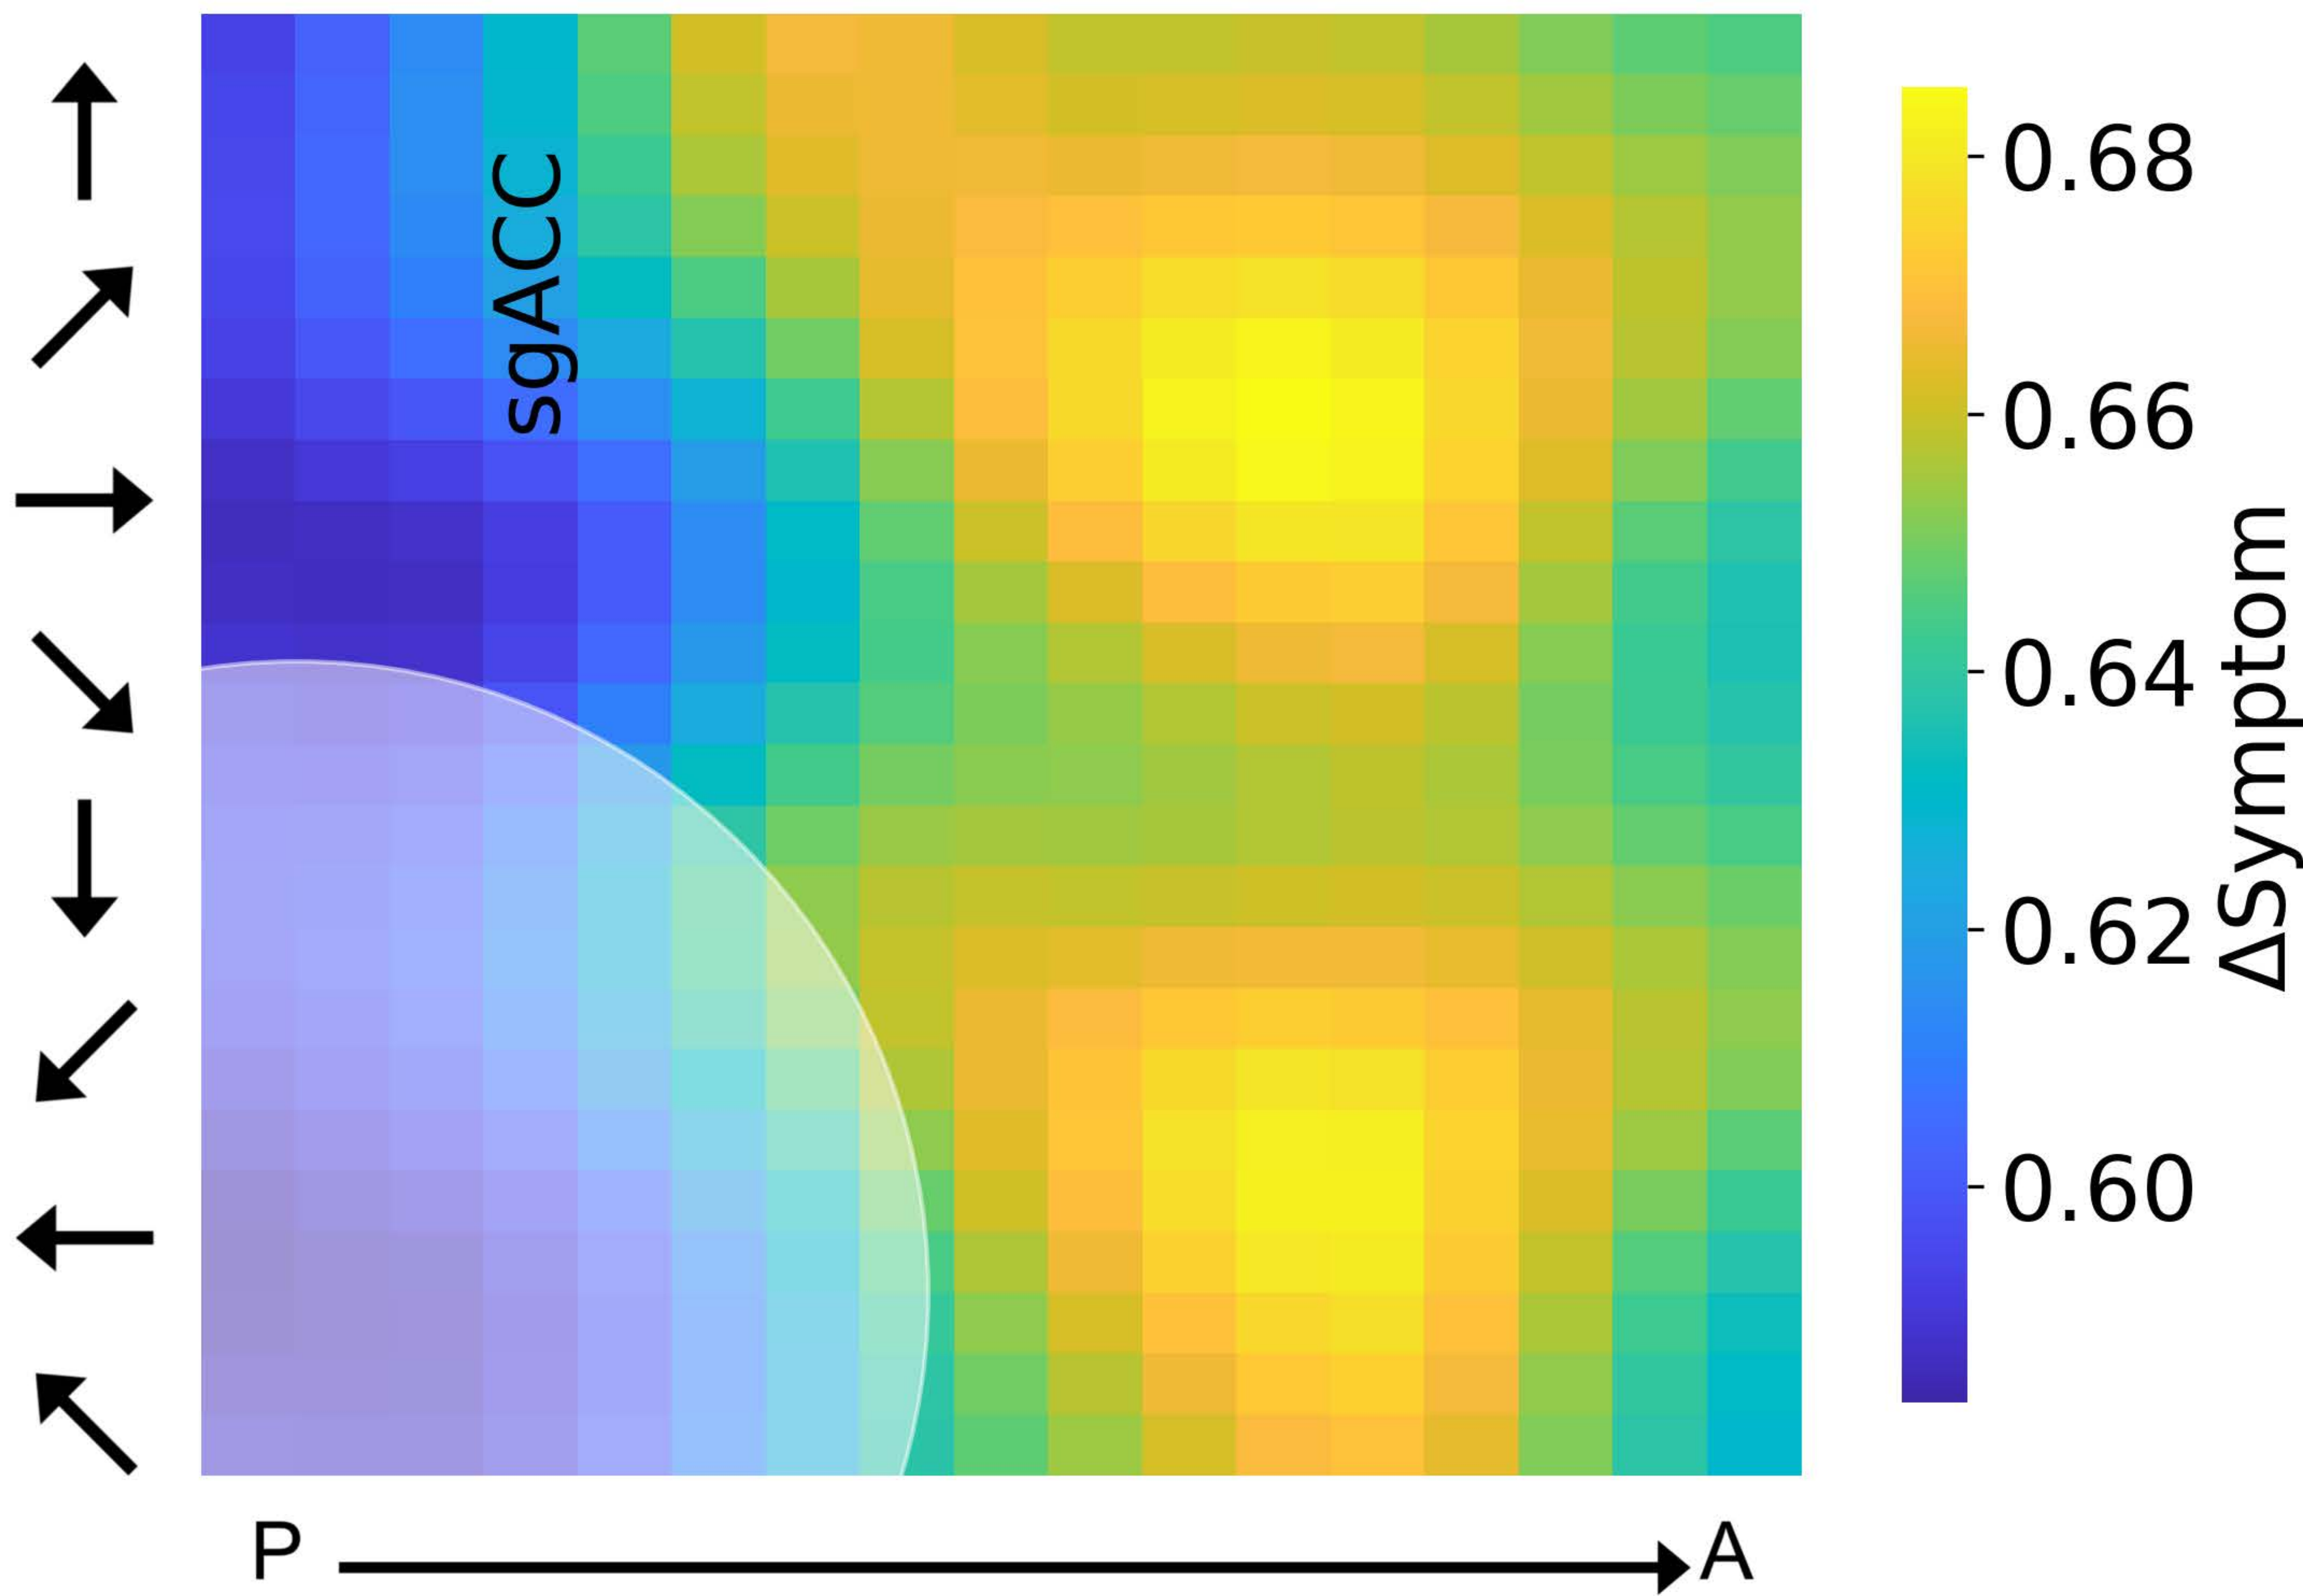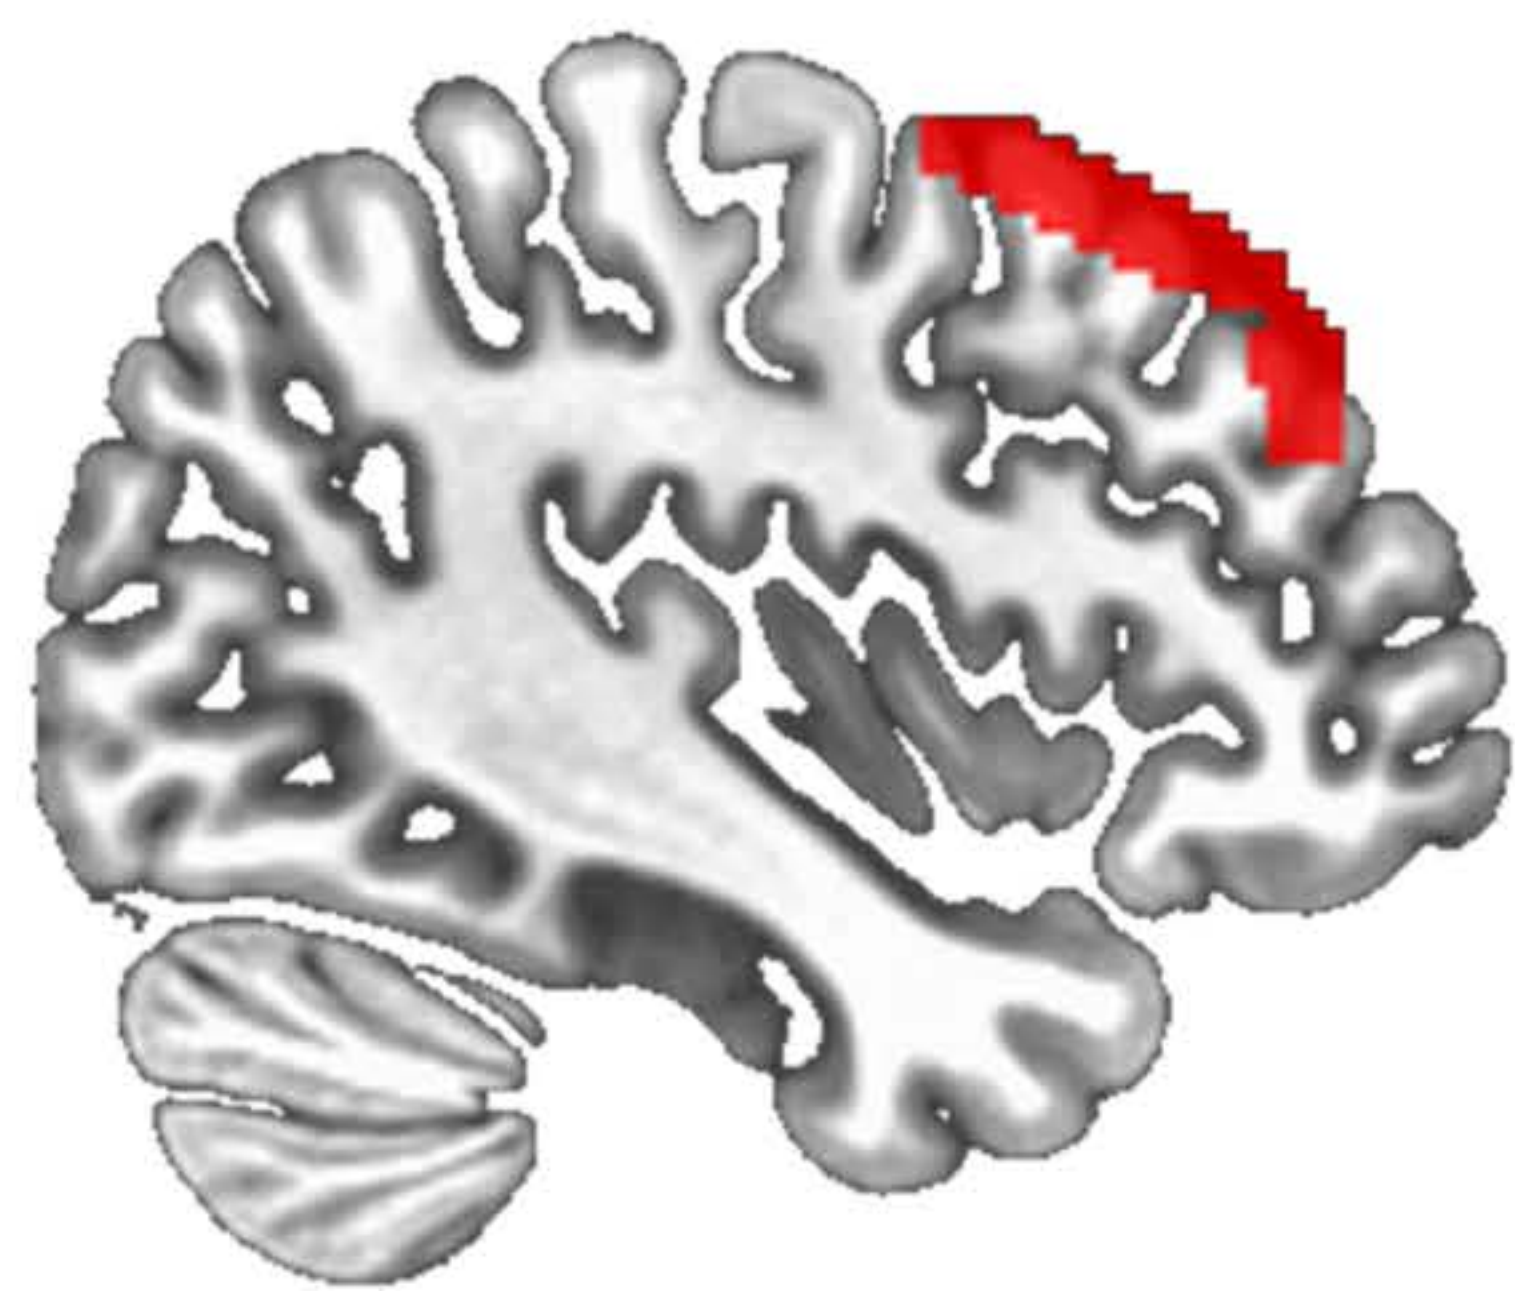



# NDARNJ618KZJ\_madr\_right\_dlpfc

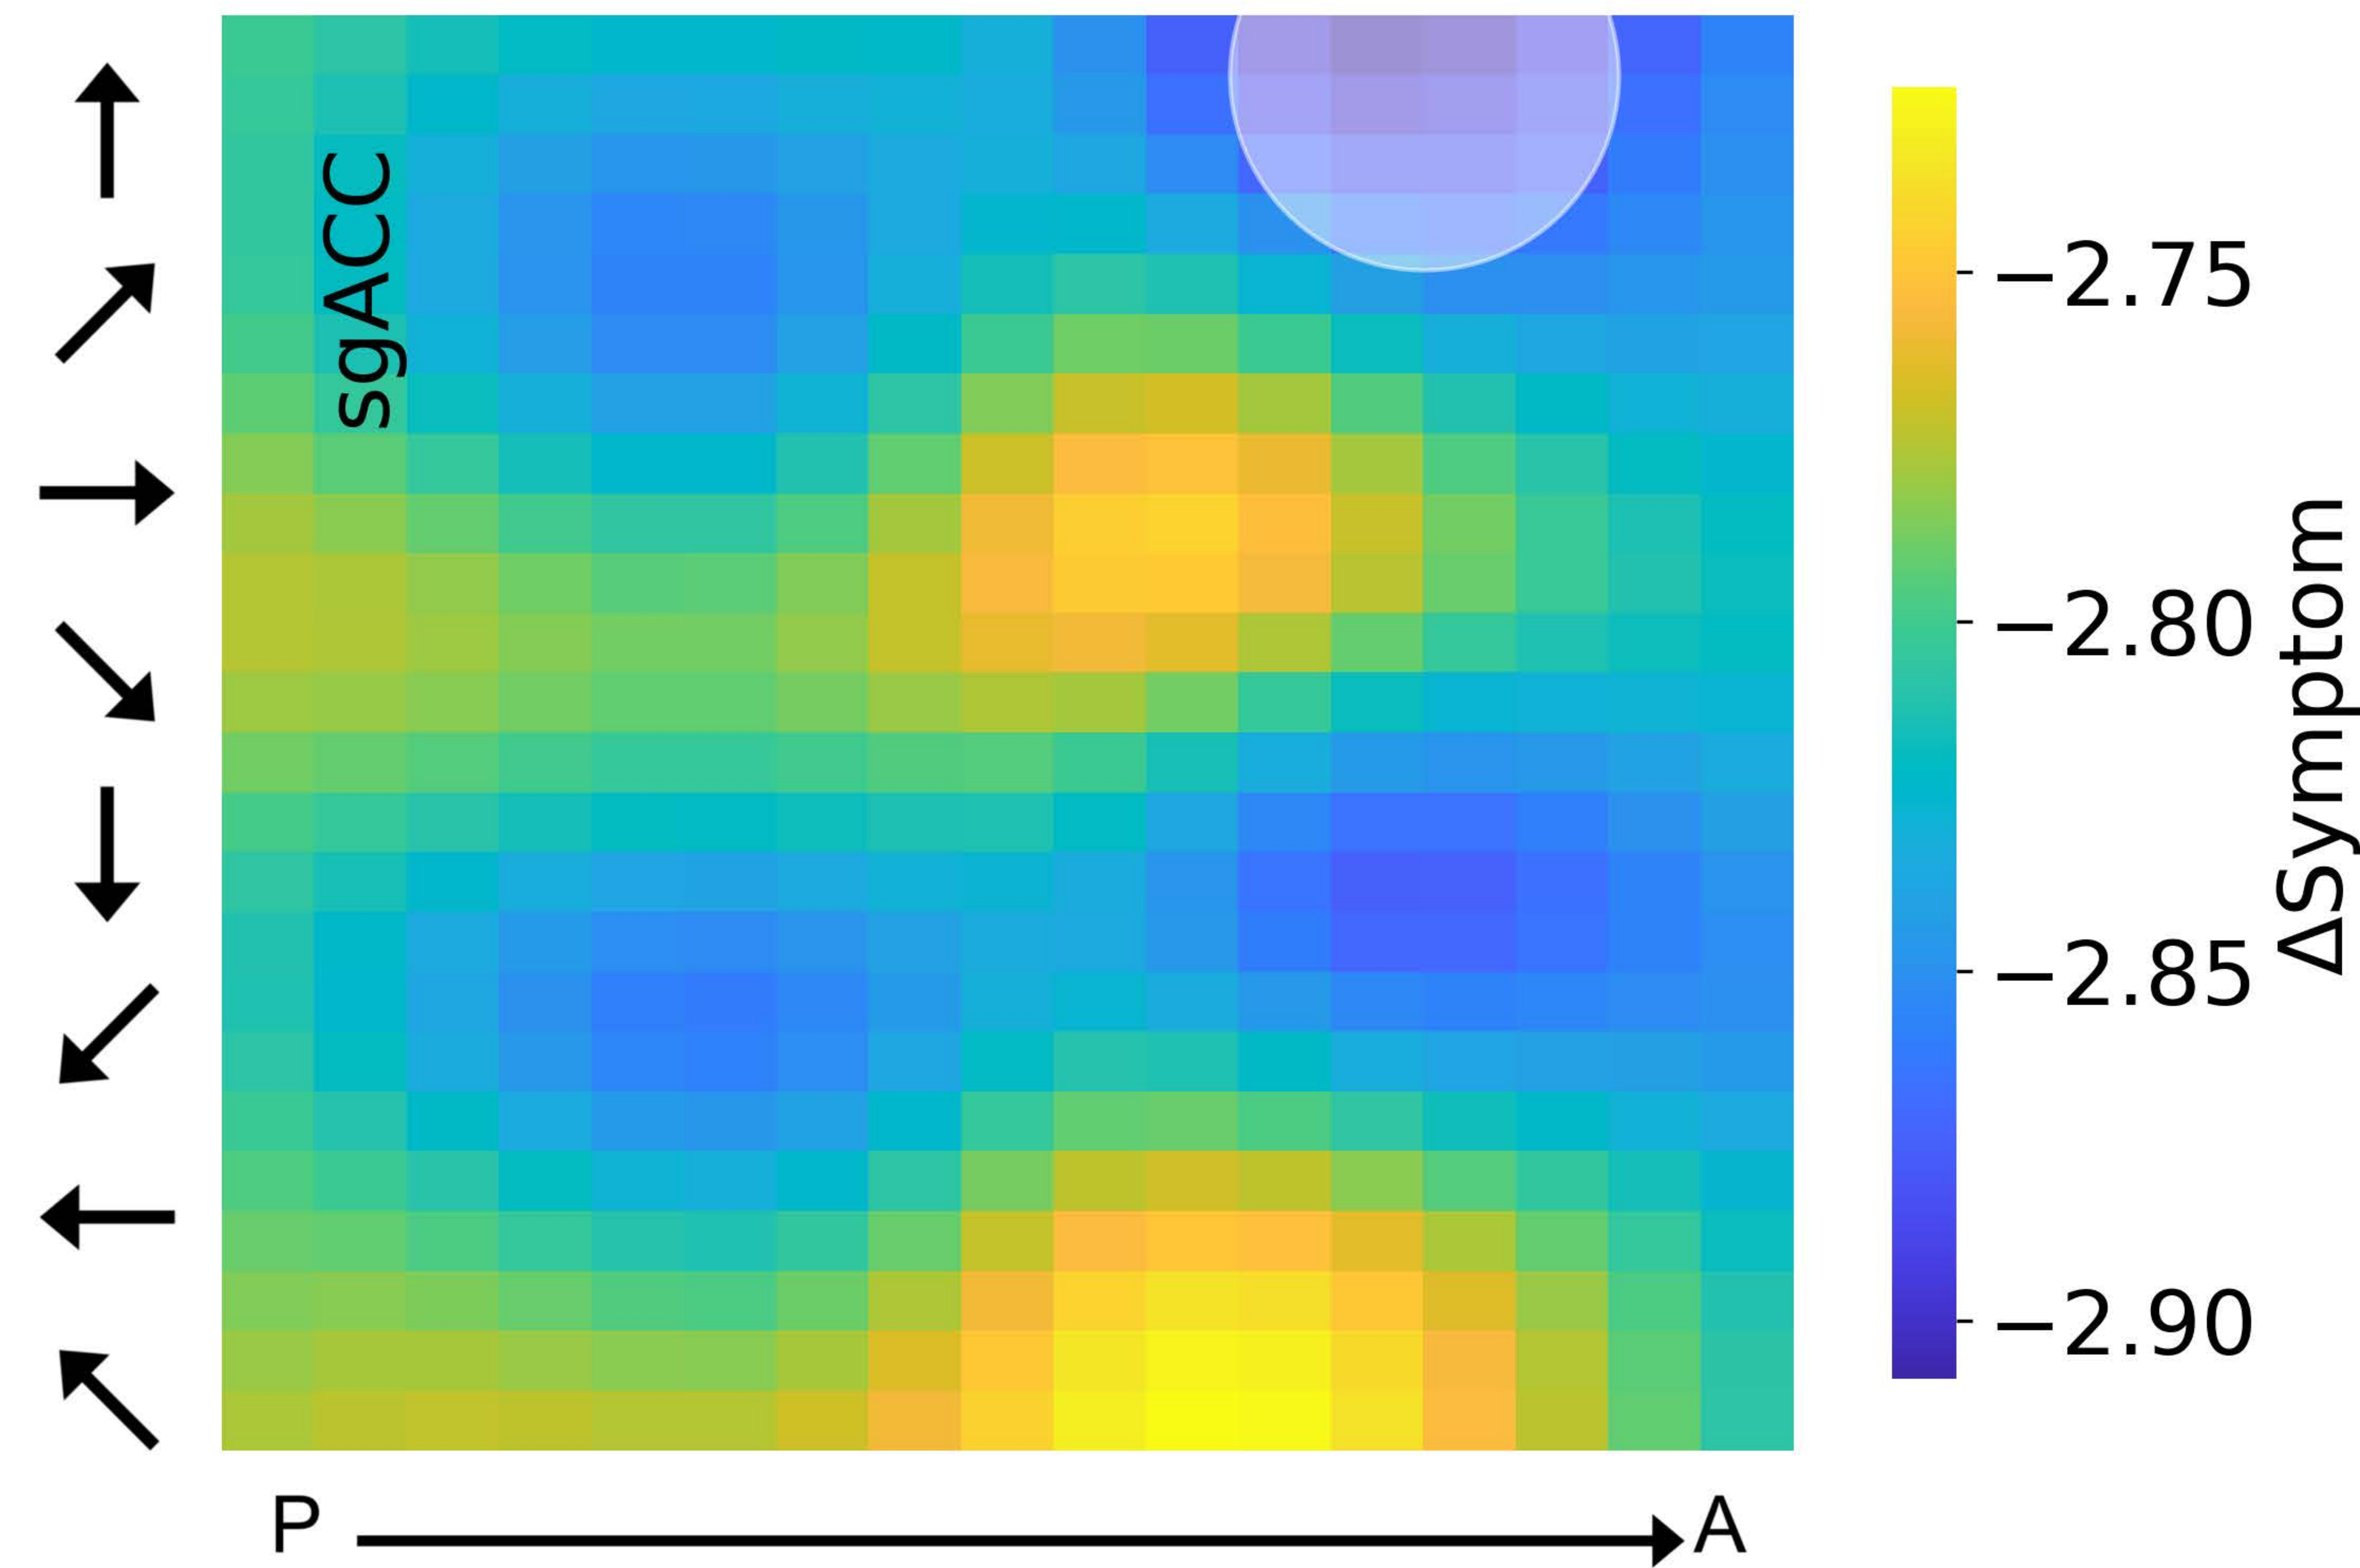



# INDARNL715RTY\_madr\_right\_dlpfc

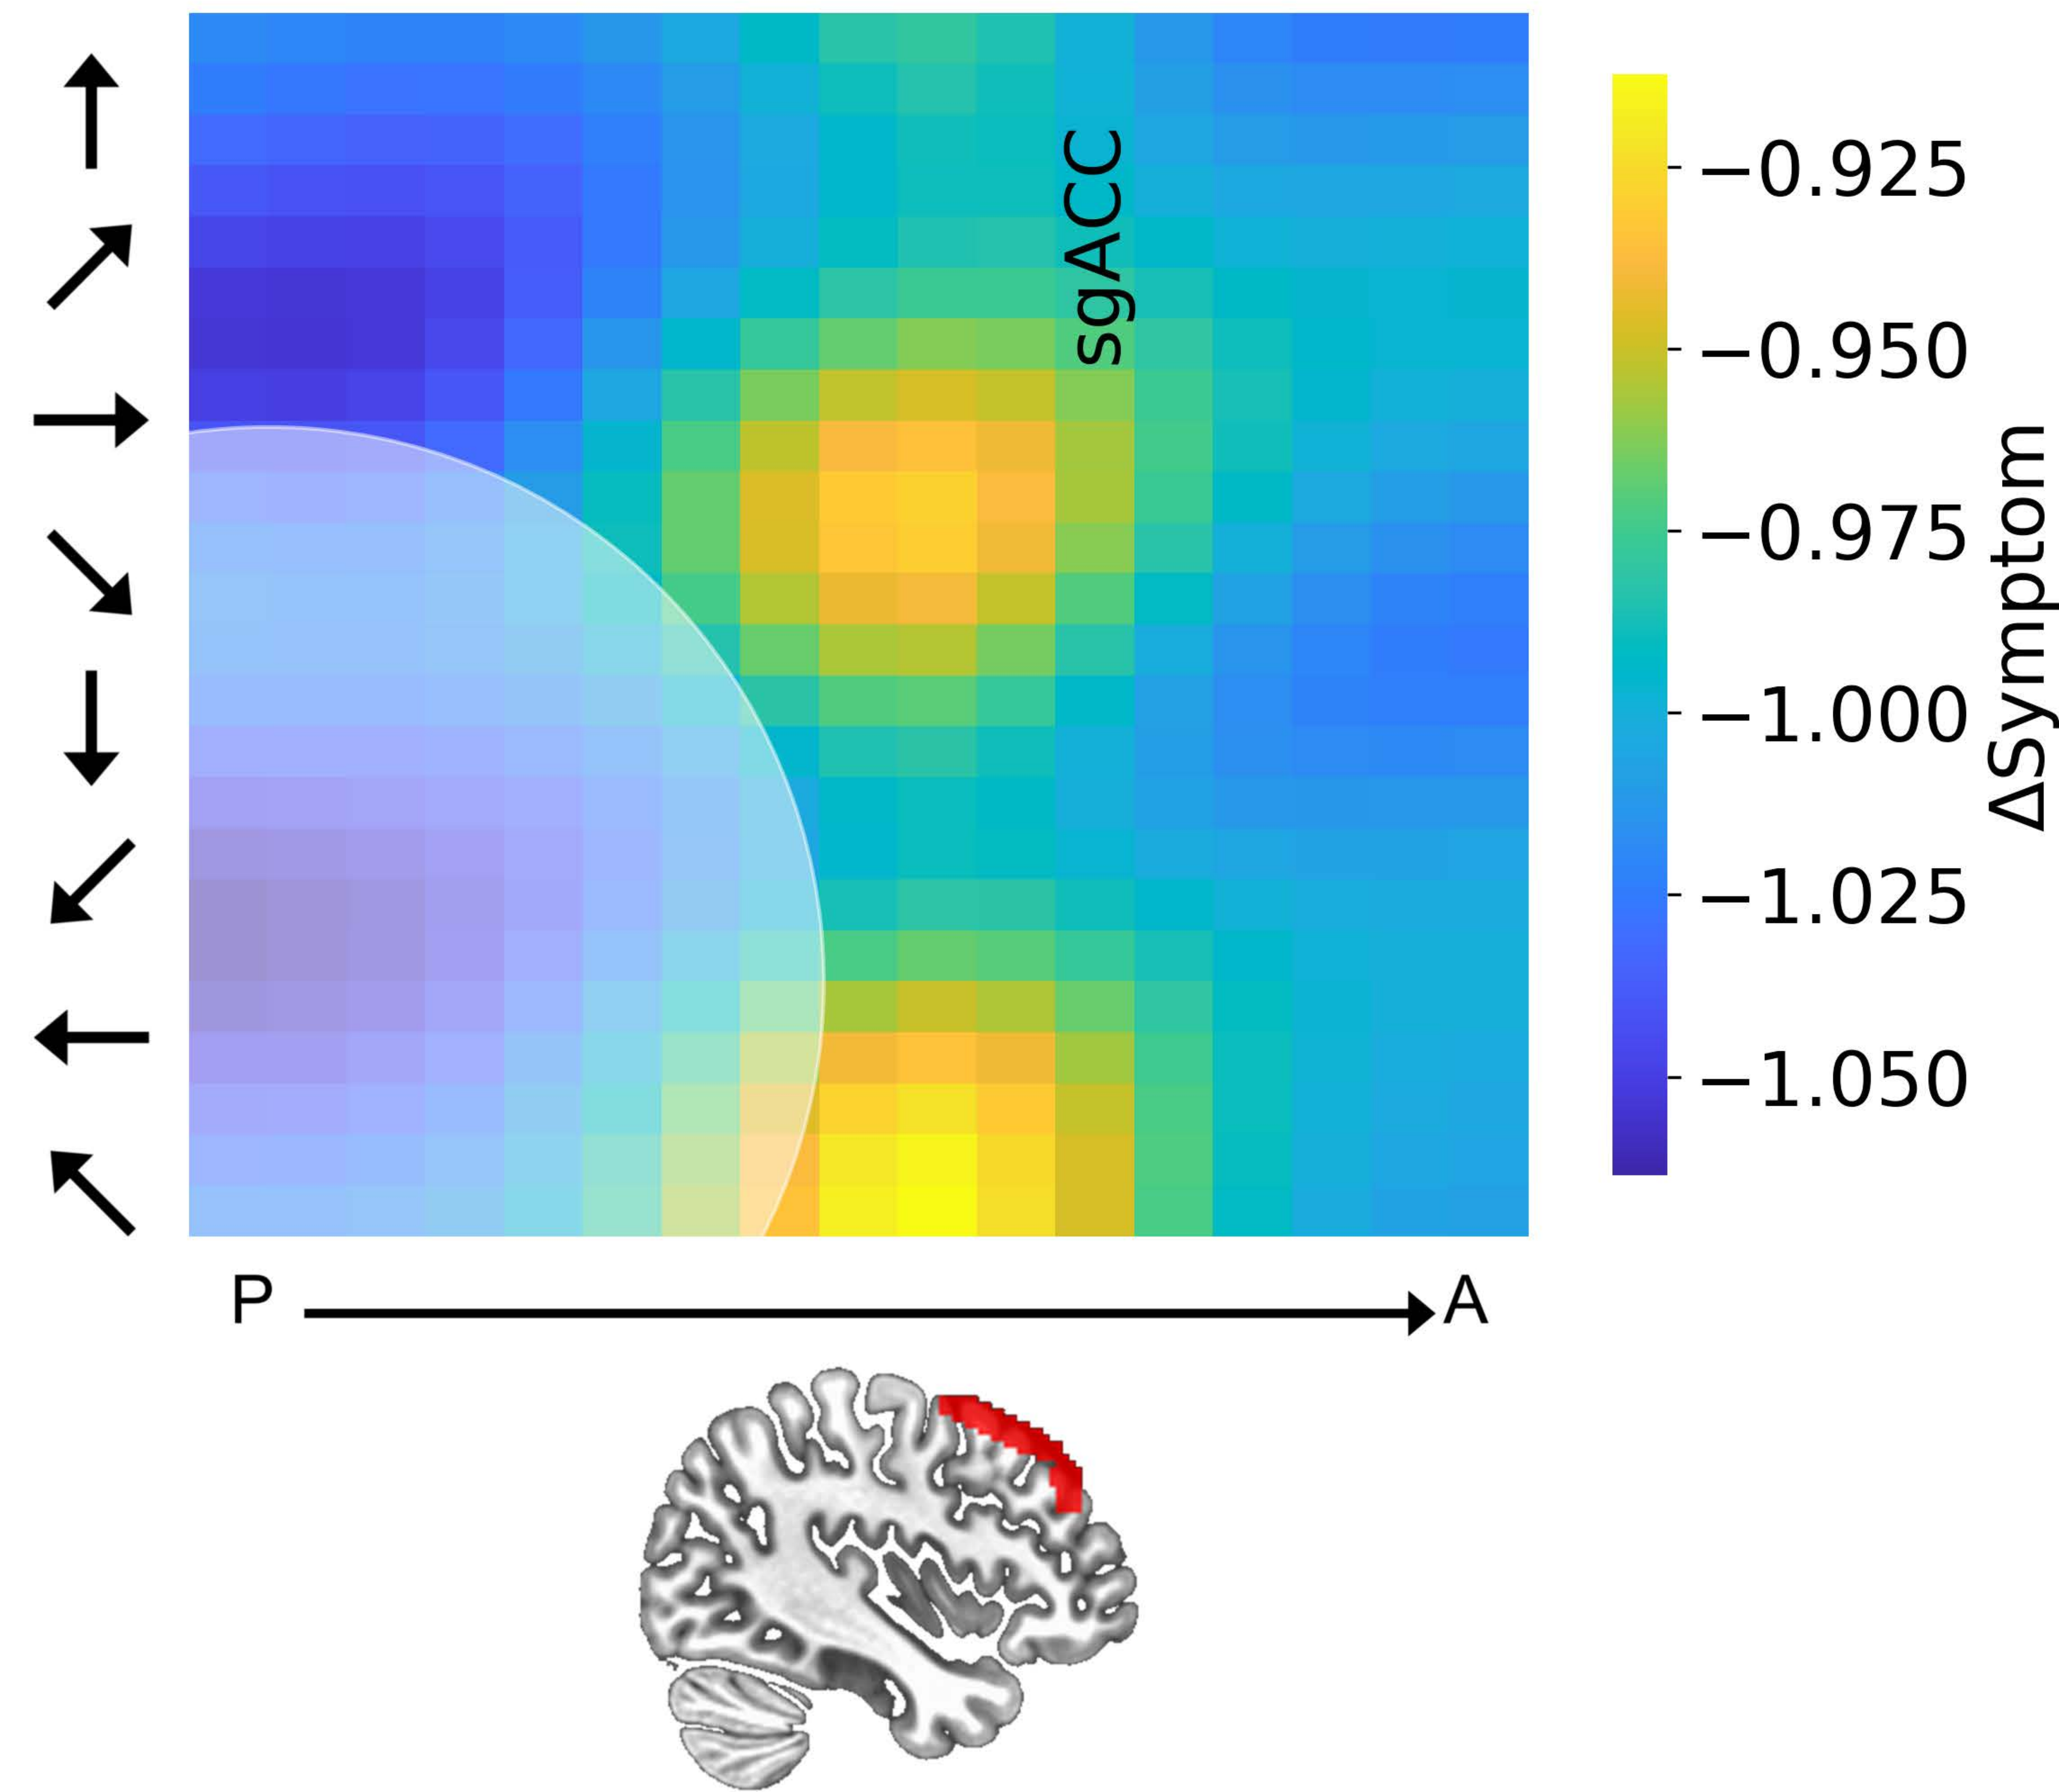



# NDARPK532CVC\_madr\_right\_dlpfc

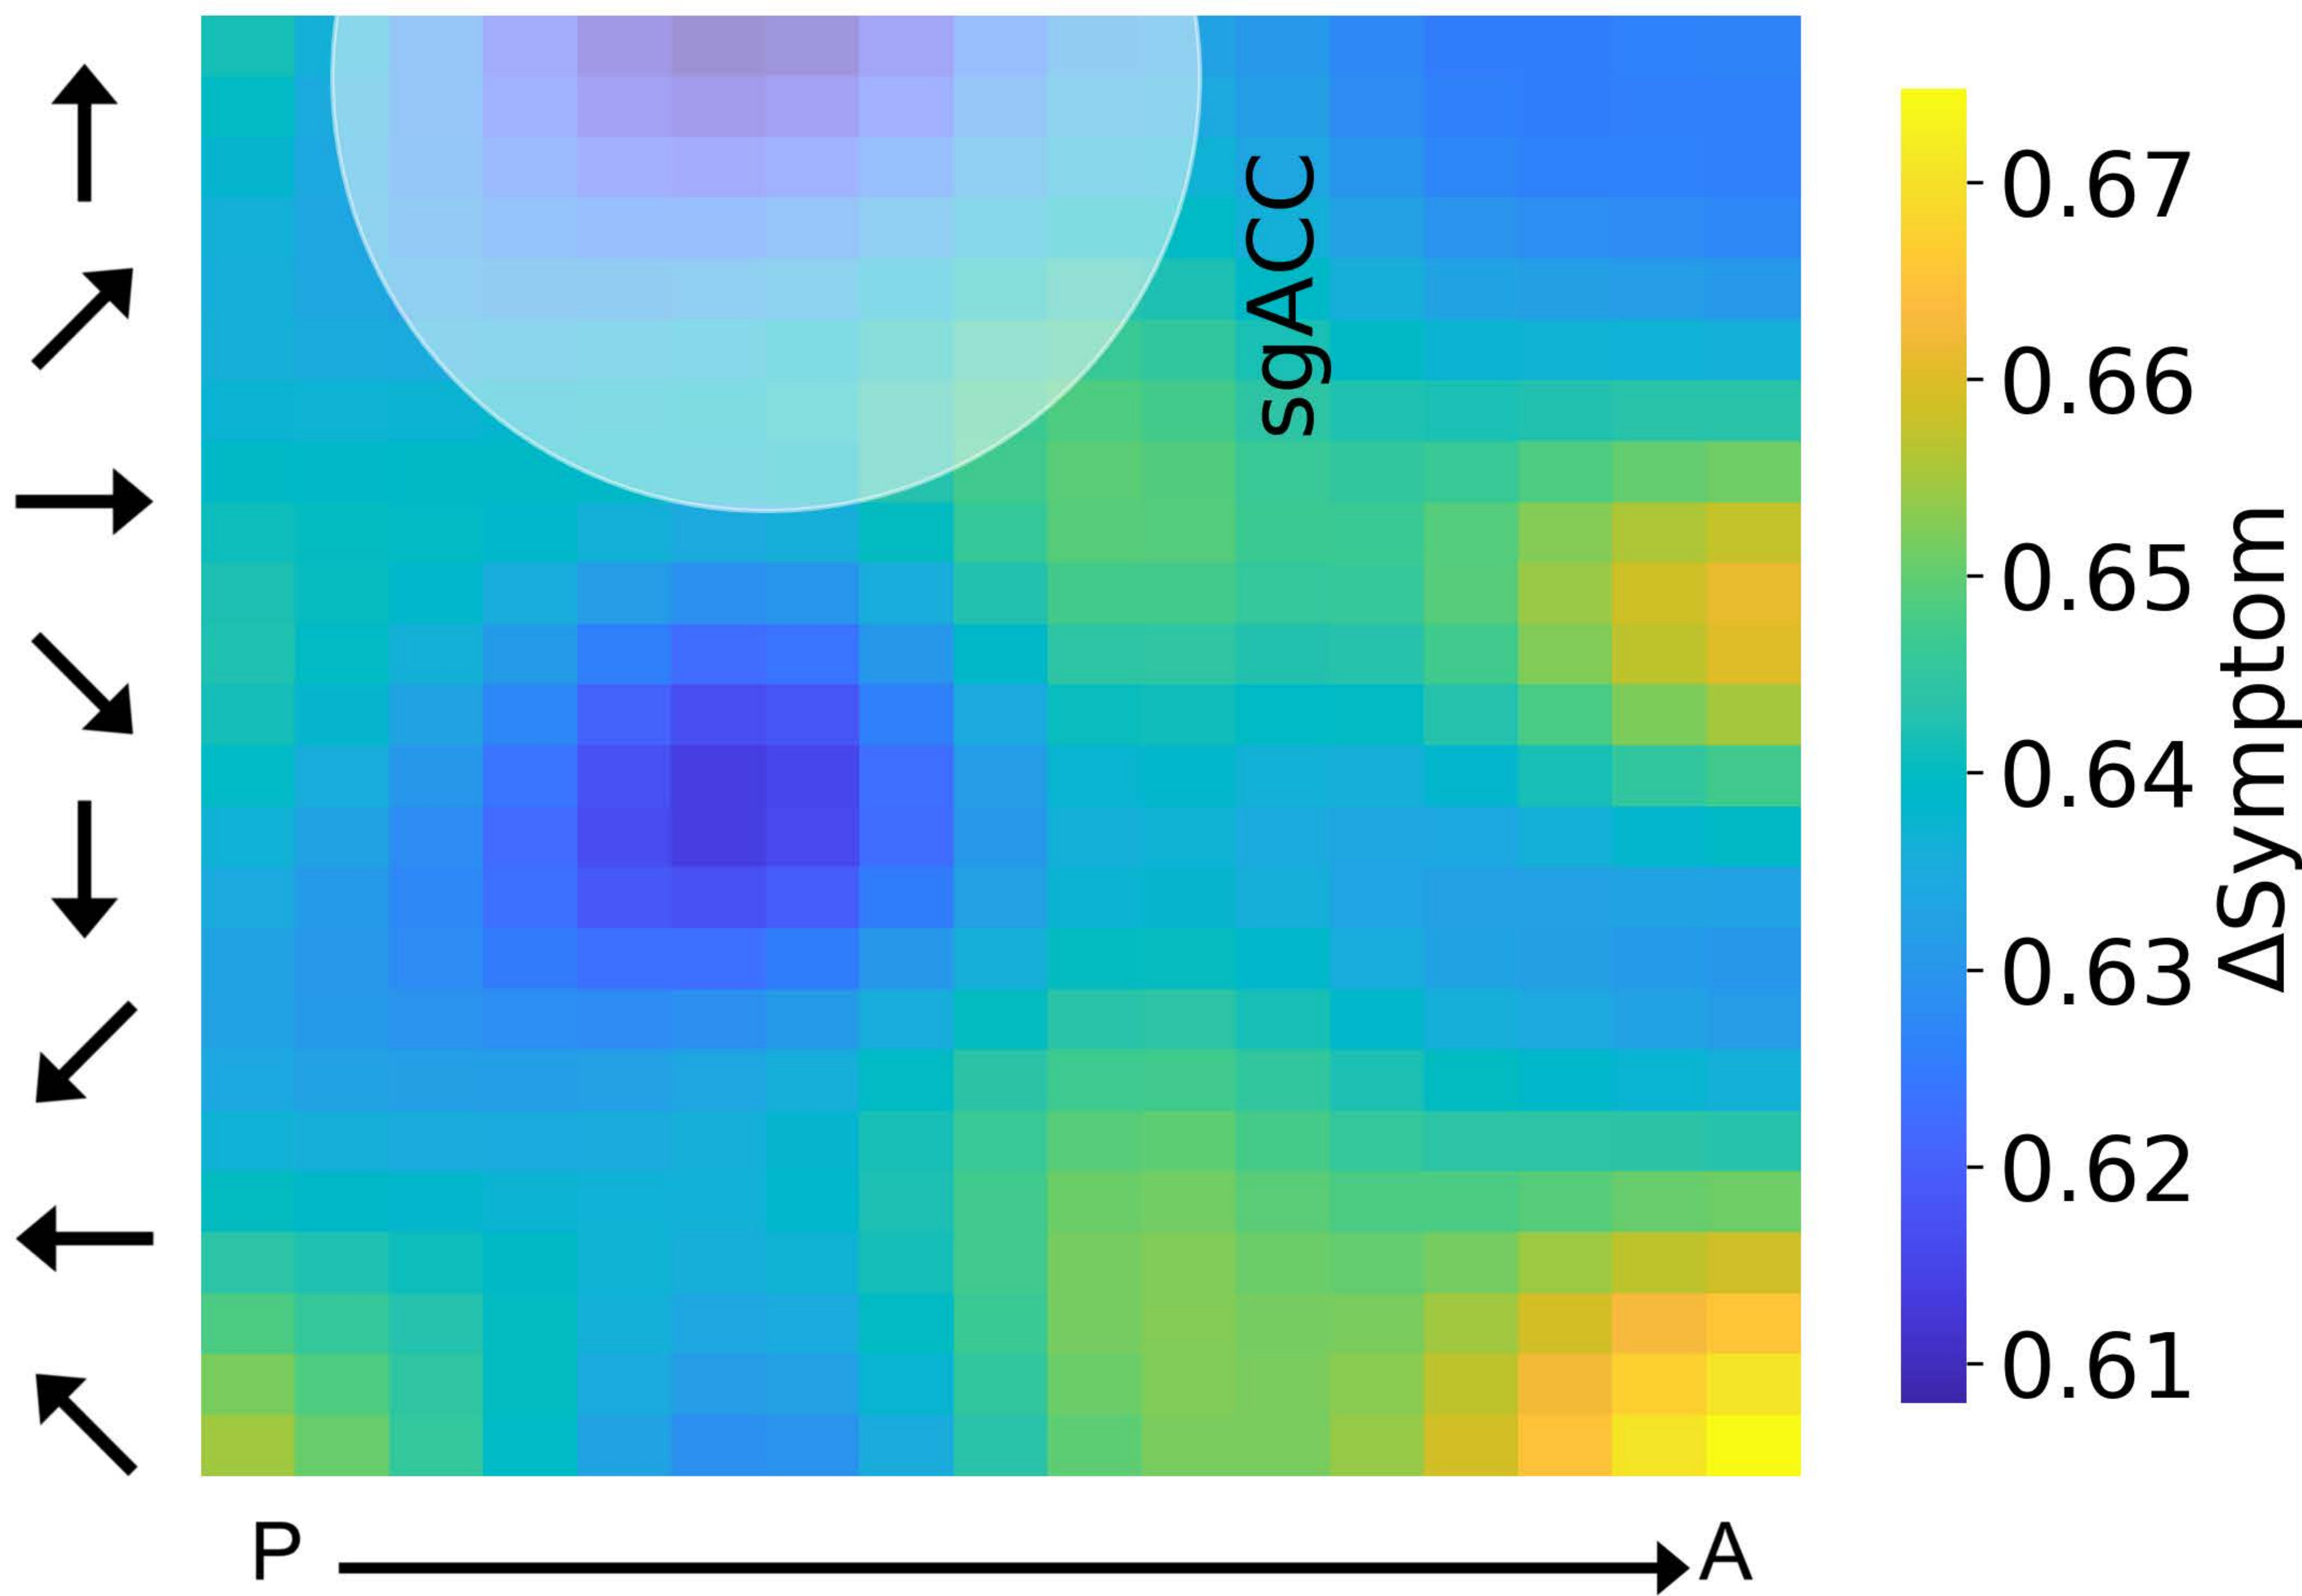



# NDARWK858FA2\_madrs\_right\_dlpfc

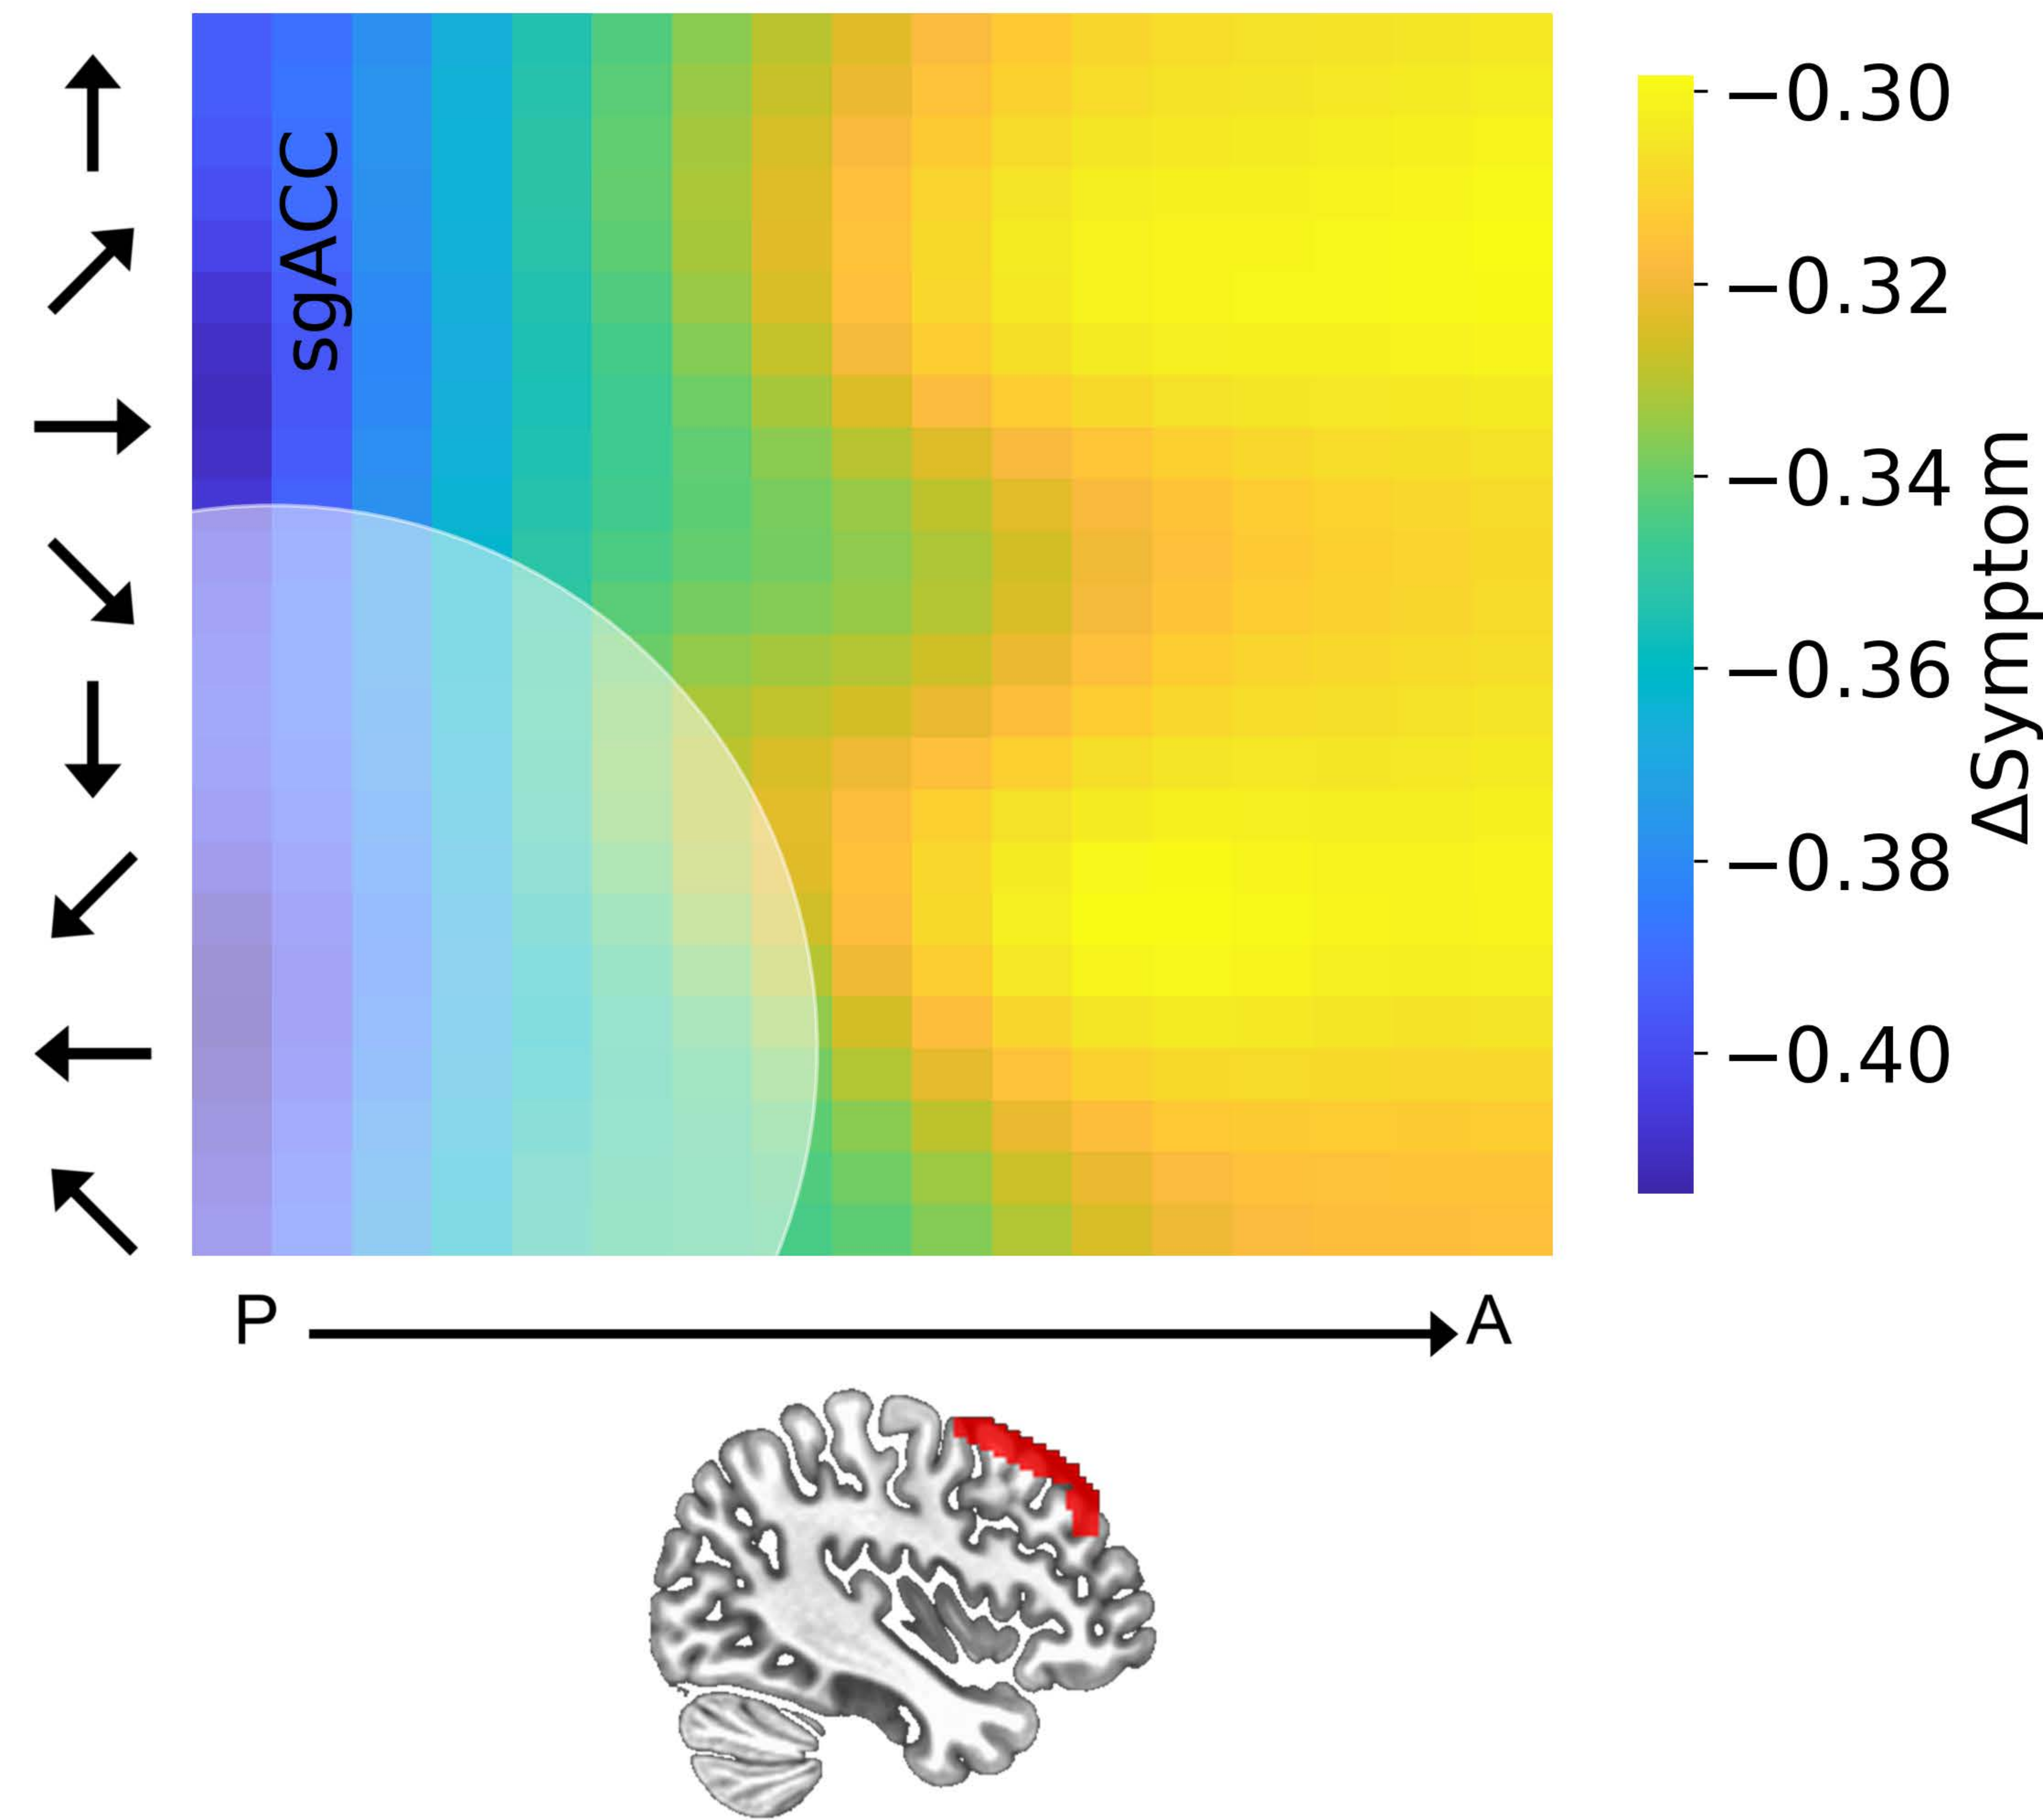



# NDARWM071DRZ\_madrs\_right\_dlpfc

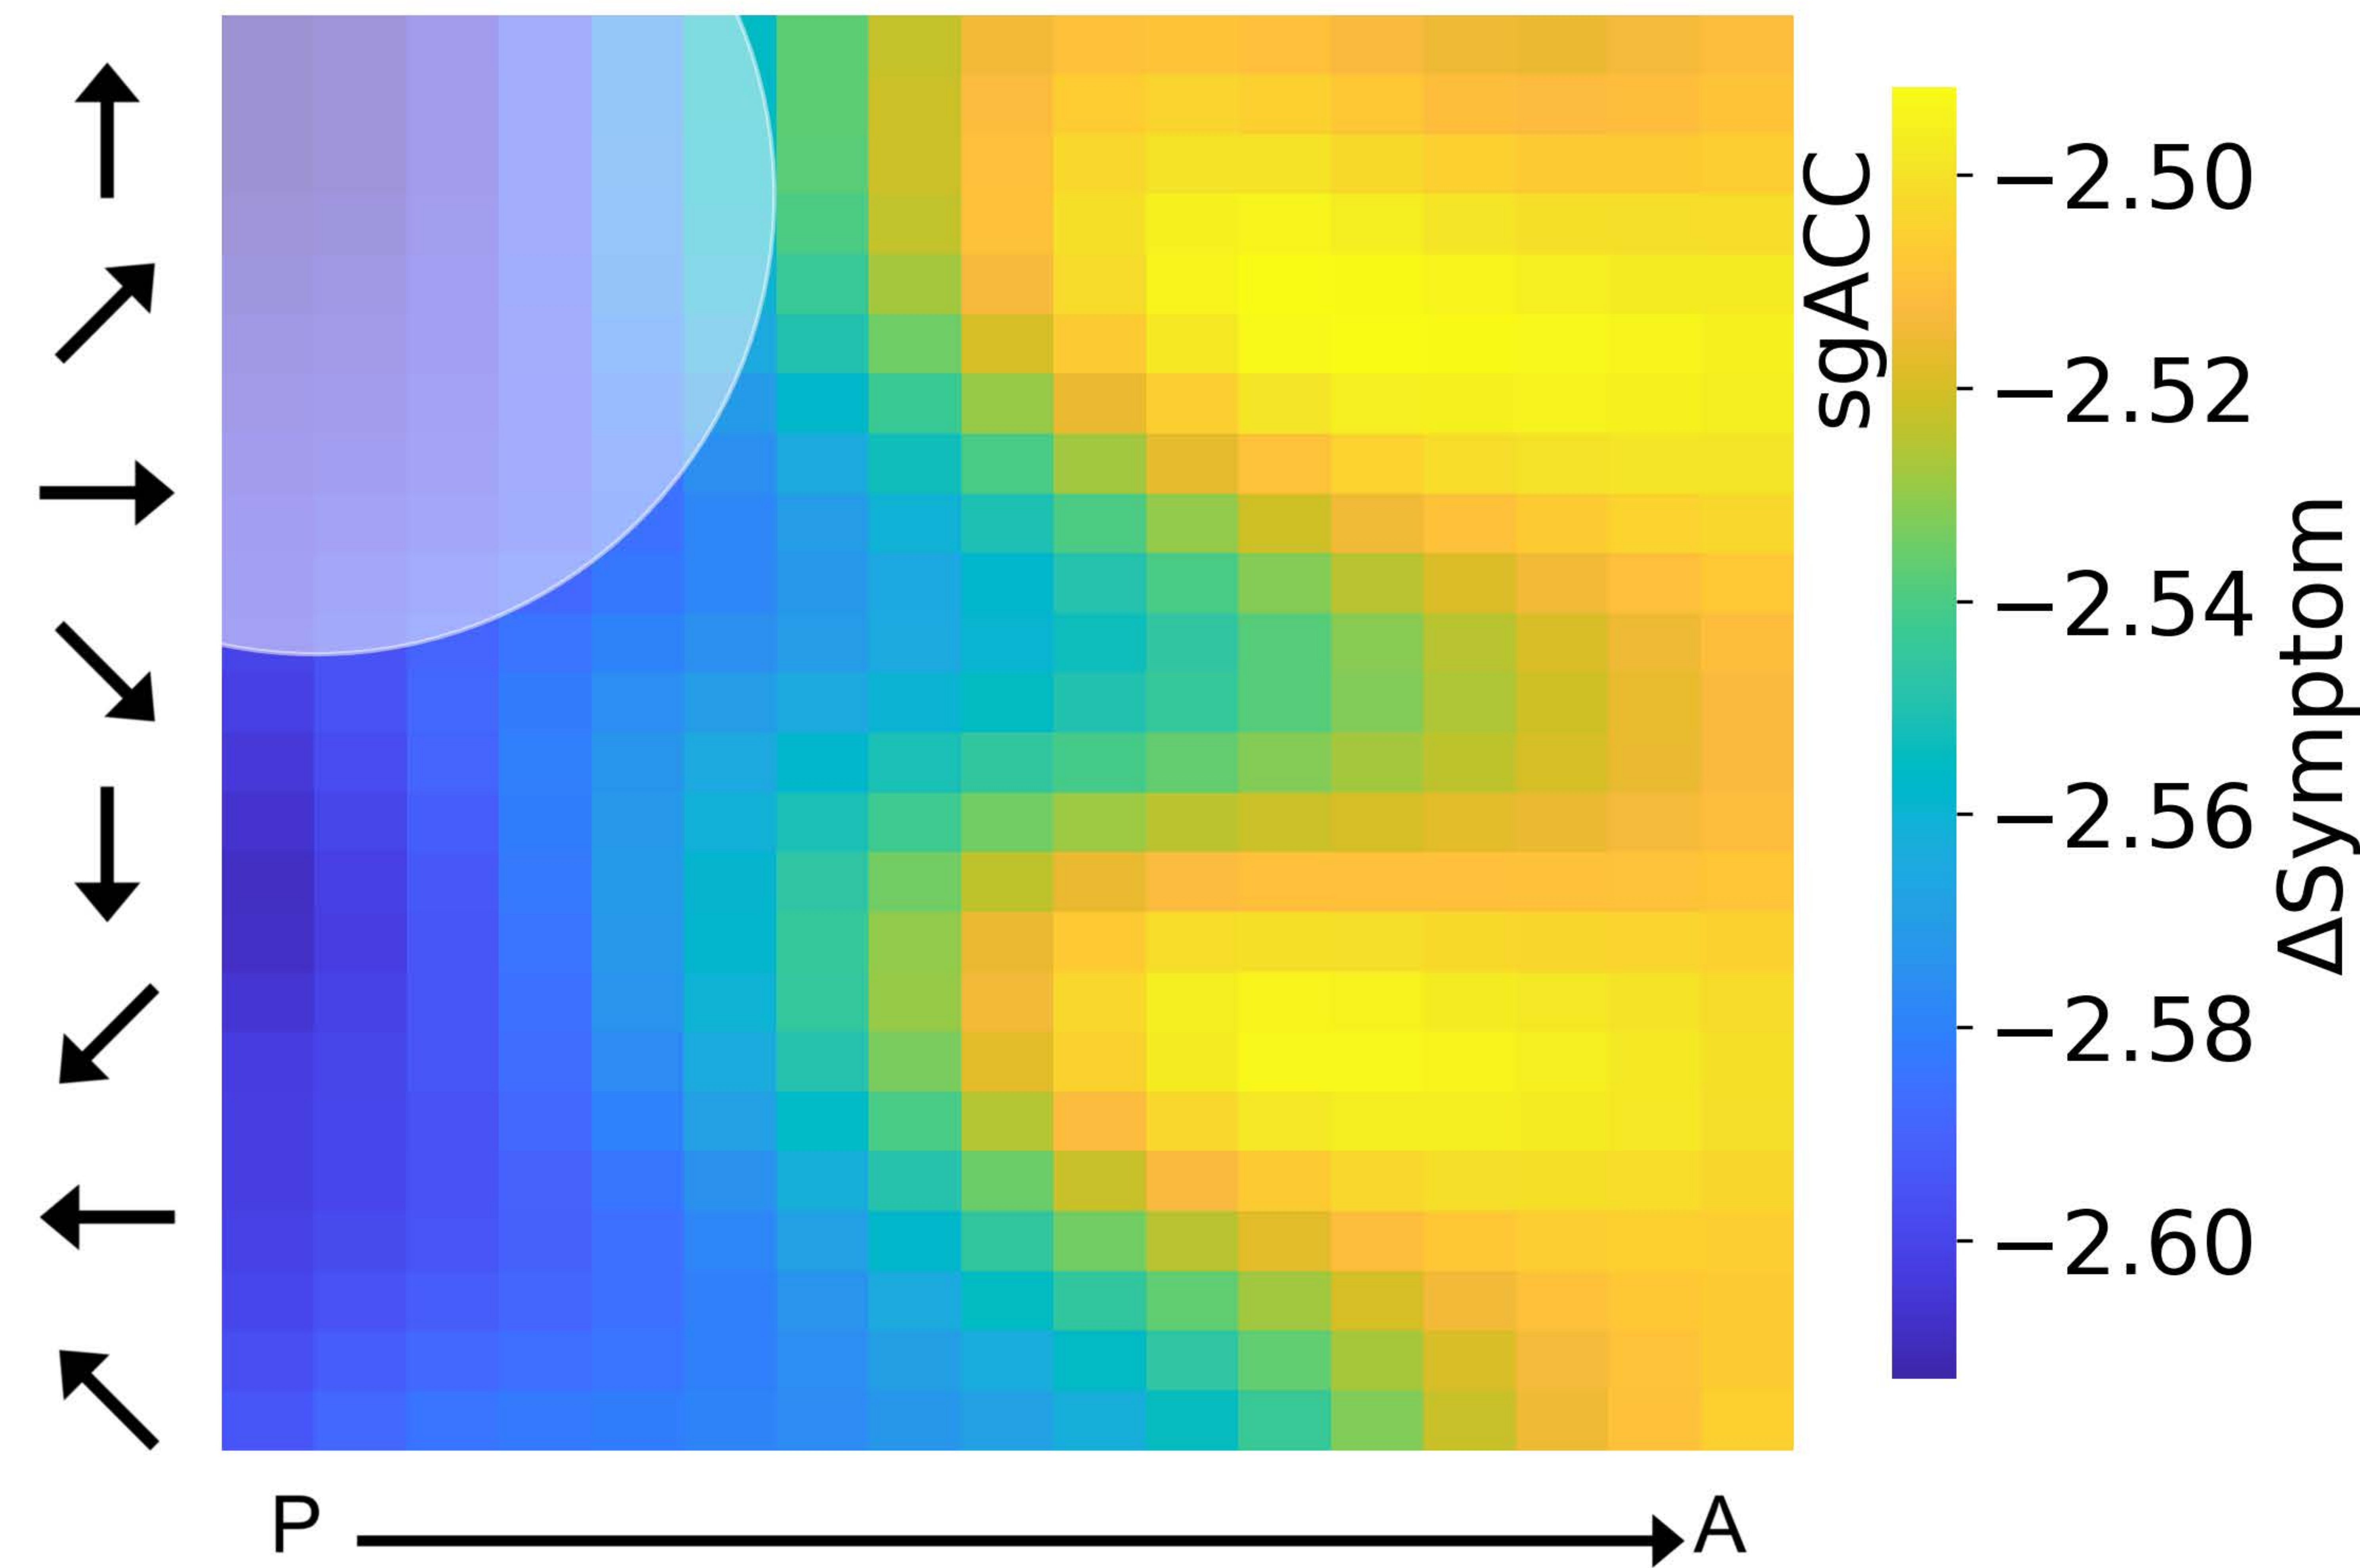



# INDARWT226PU5\_madrs\_right\_dlpfc

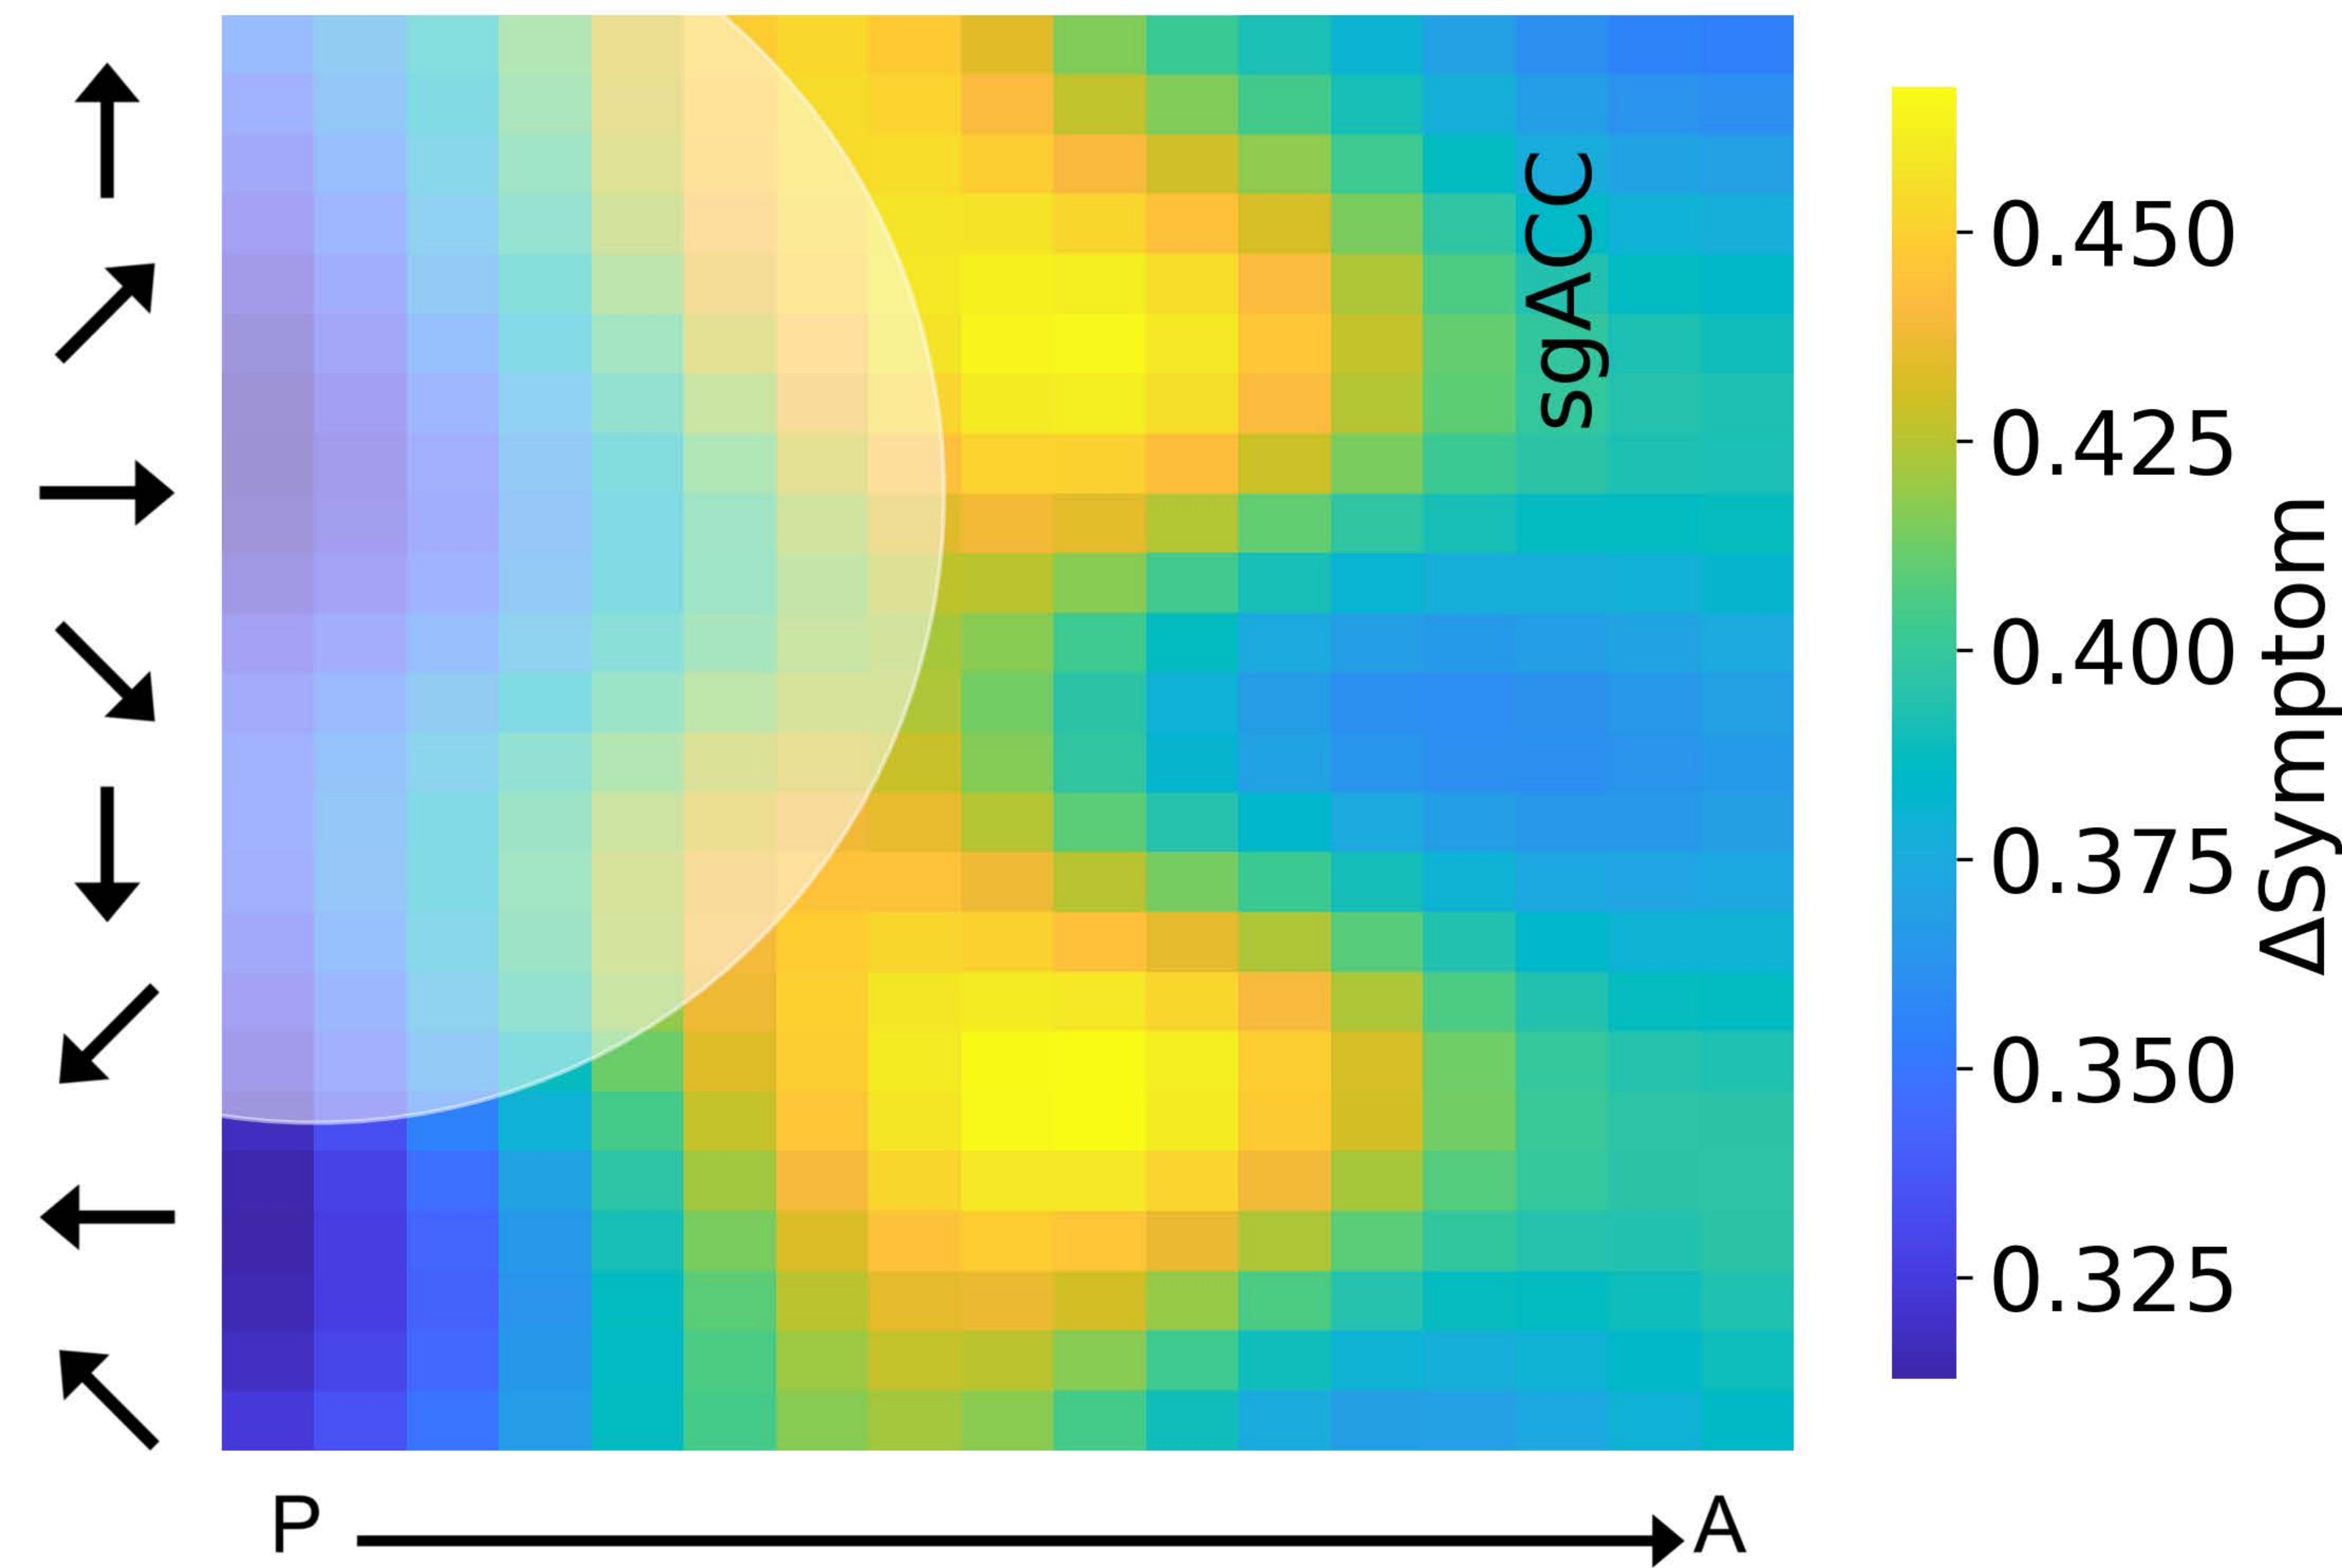



# NDARWU139LAY\_madrs\_right\_dlpfc

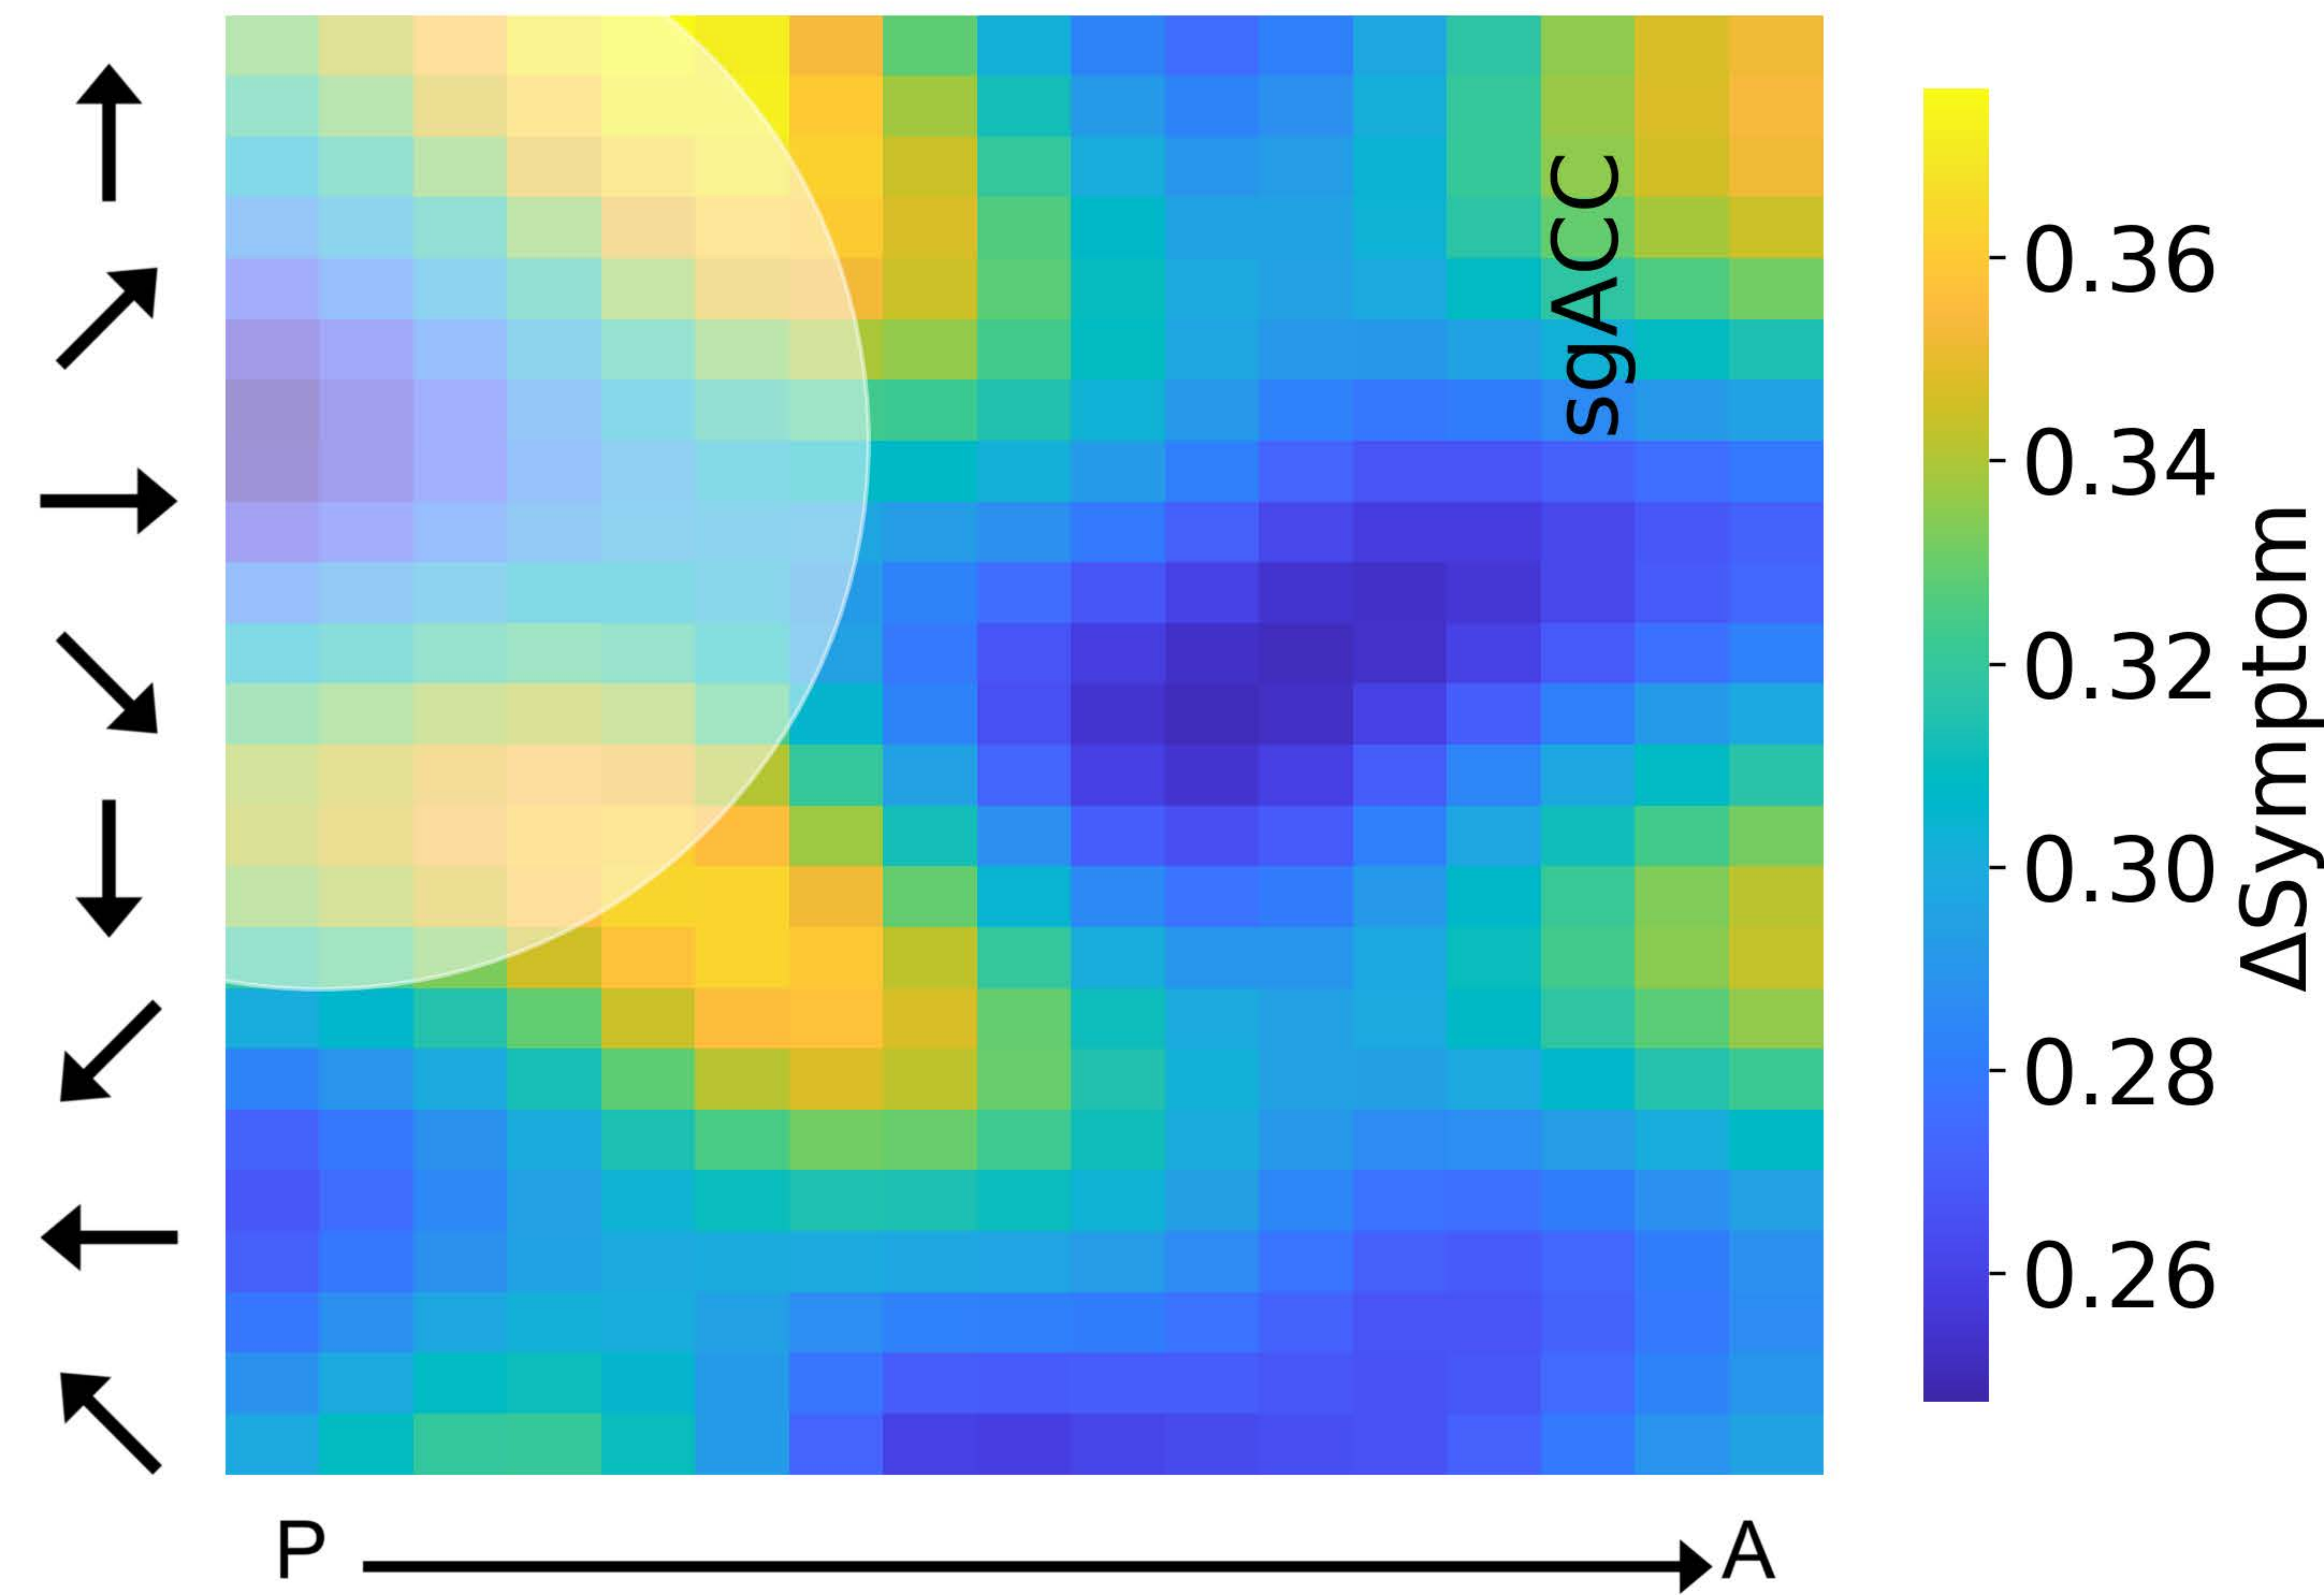



NDARXH480BBY\_madrs\_right\_dlpfc

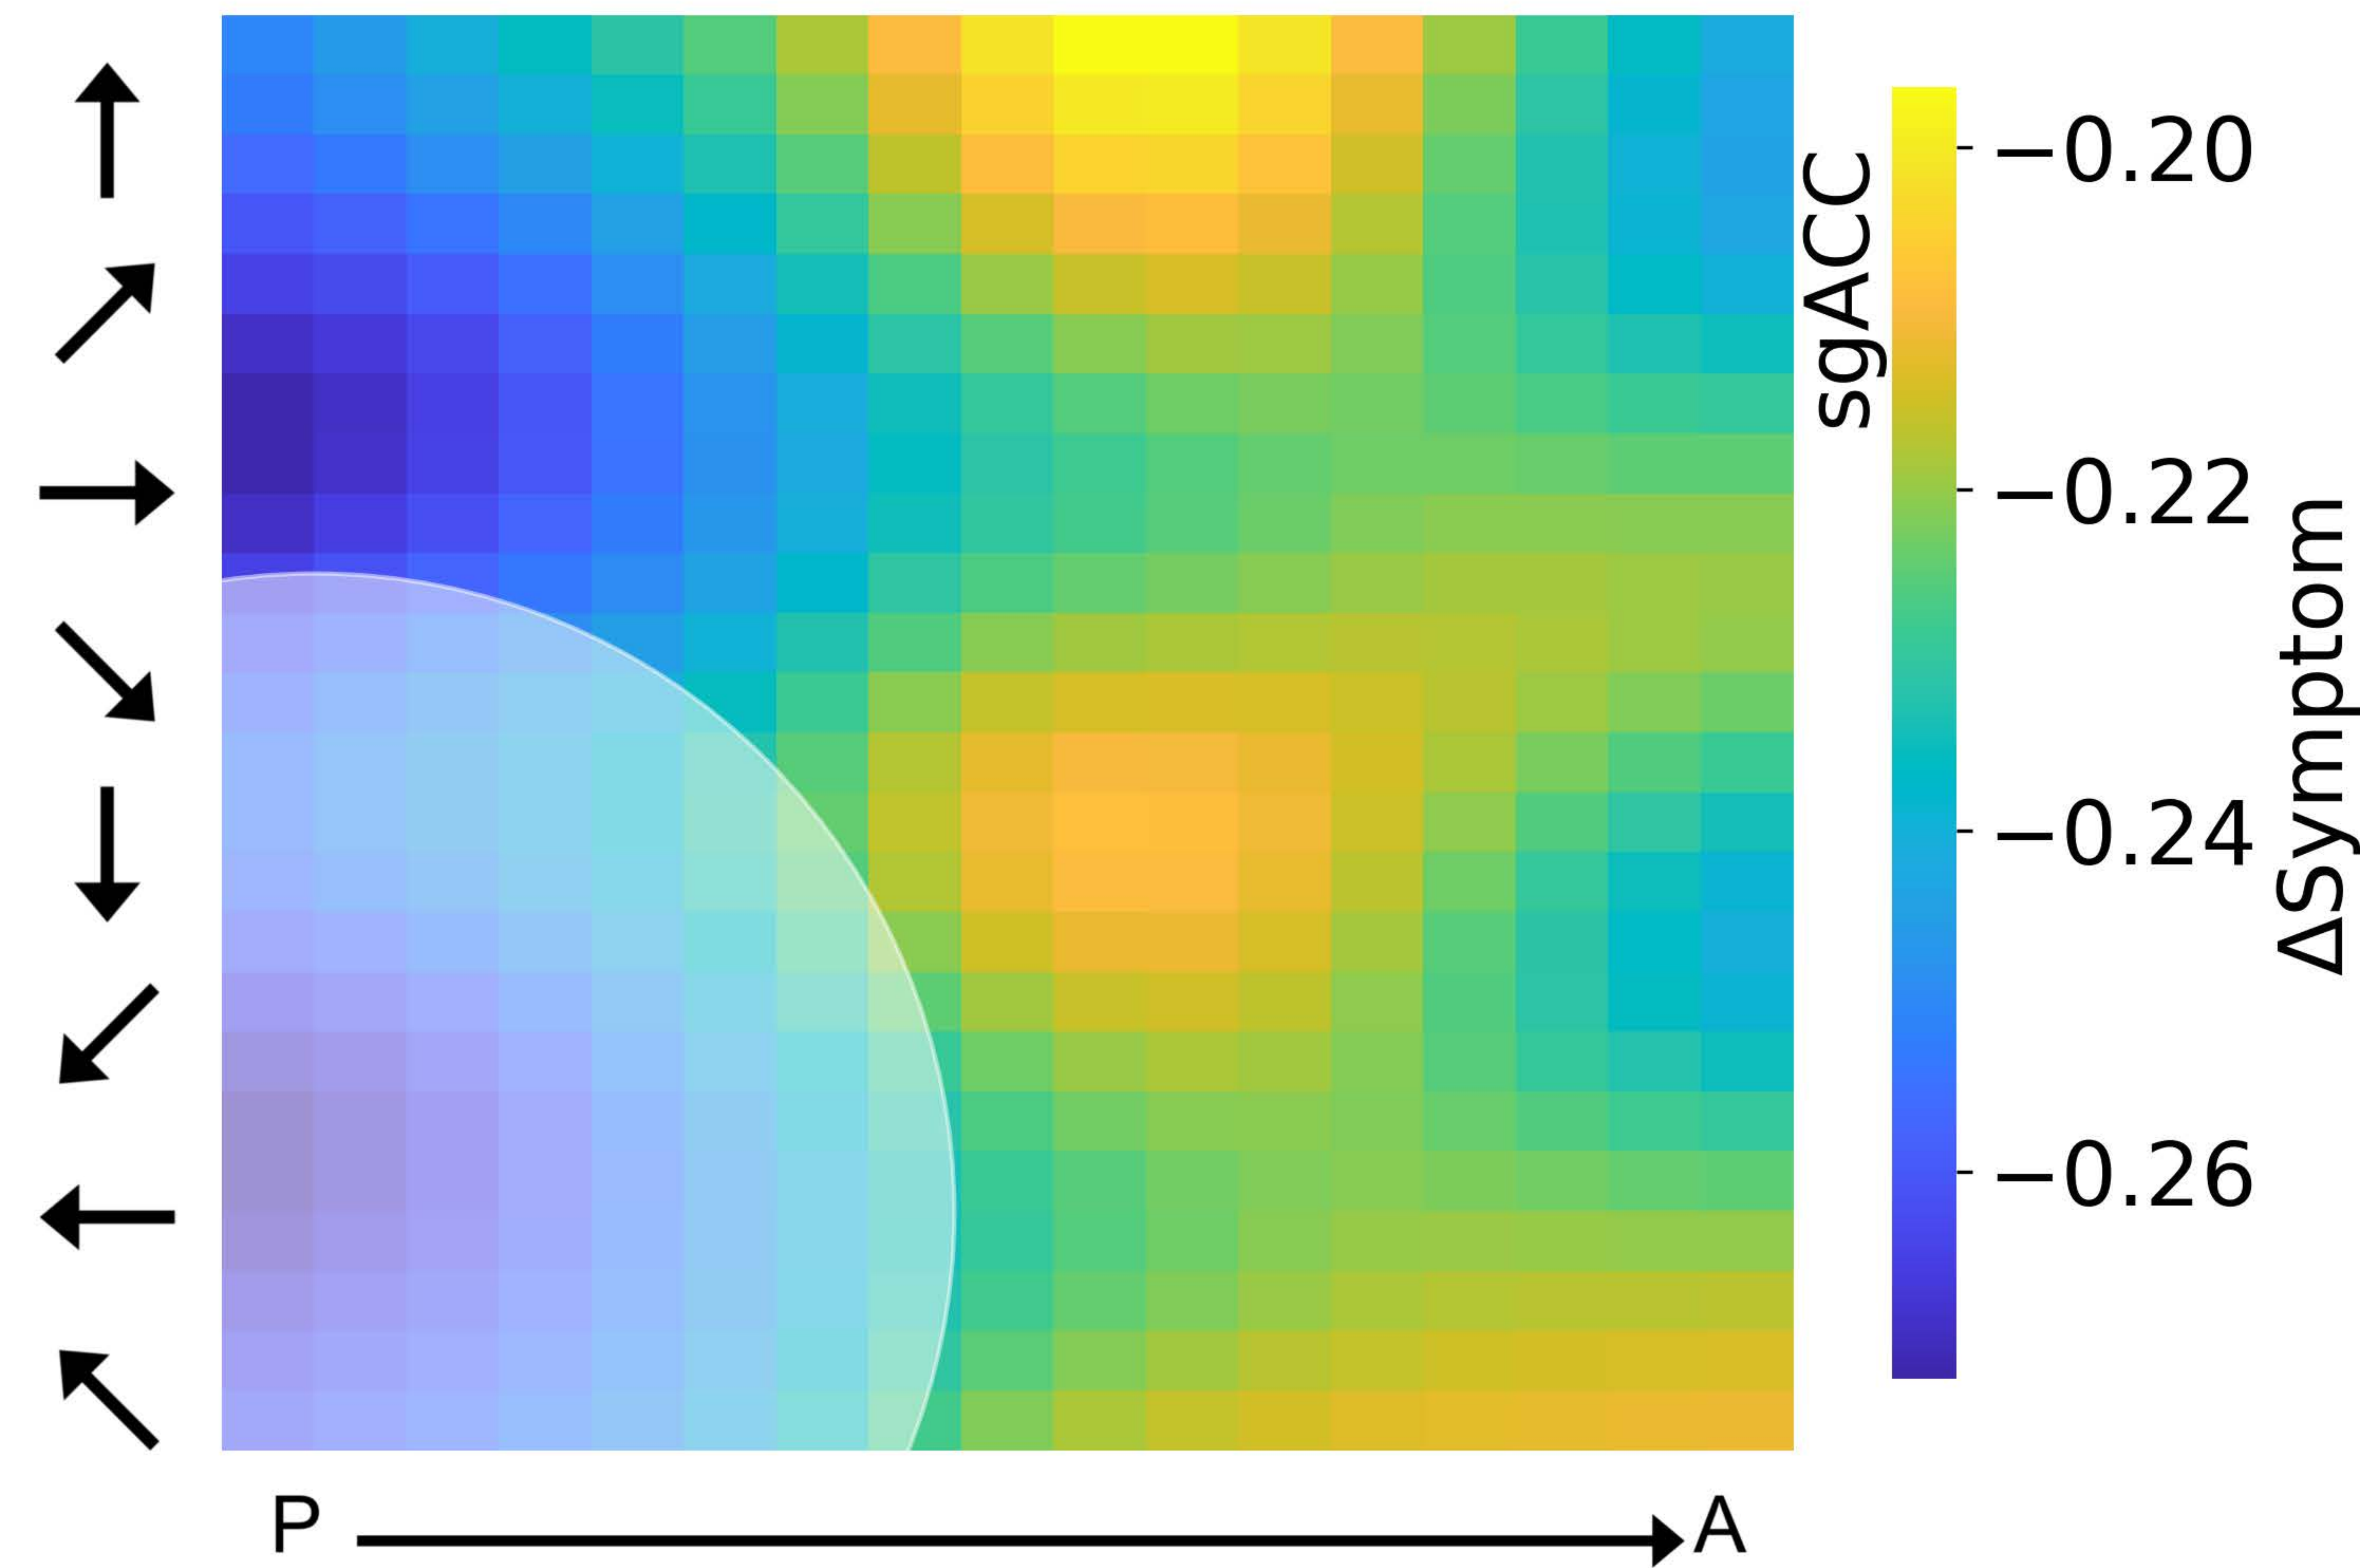



# NDARXU558HYG\_madrs\_right\_dlpfc

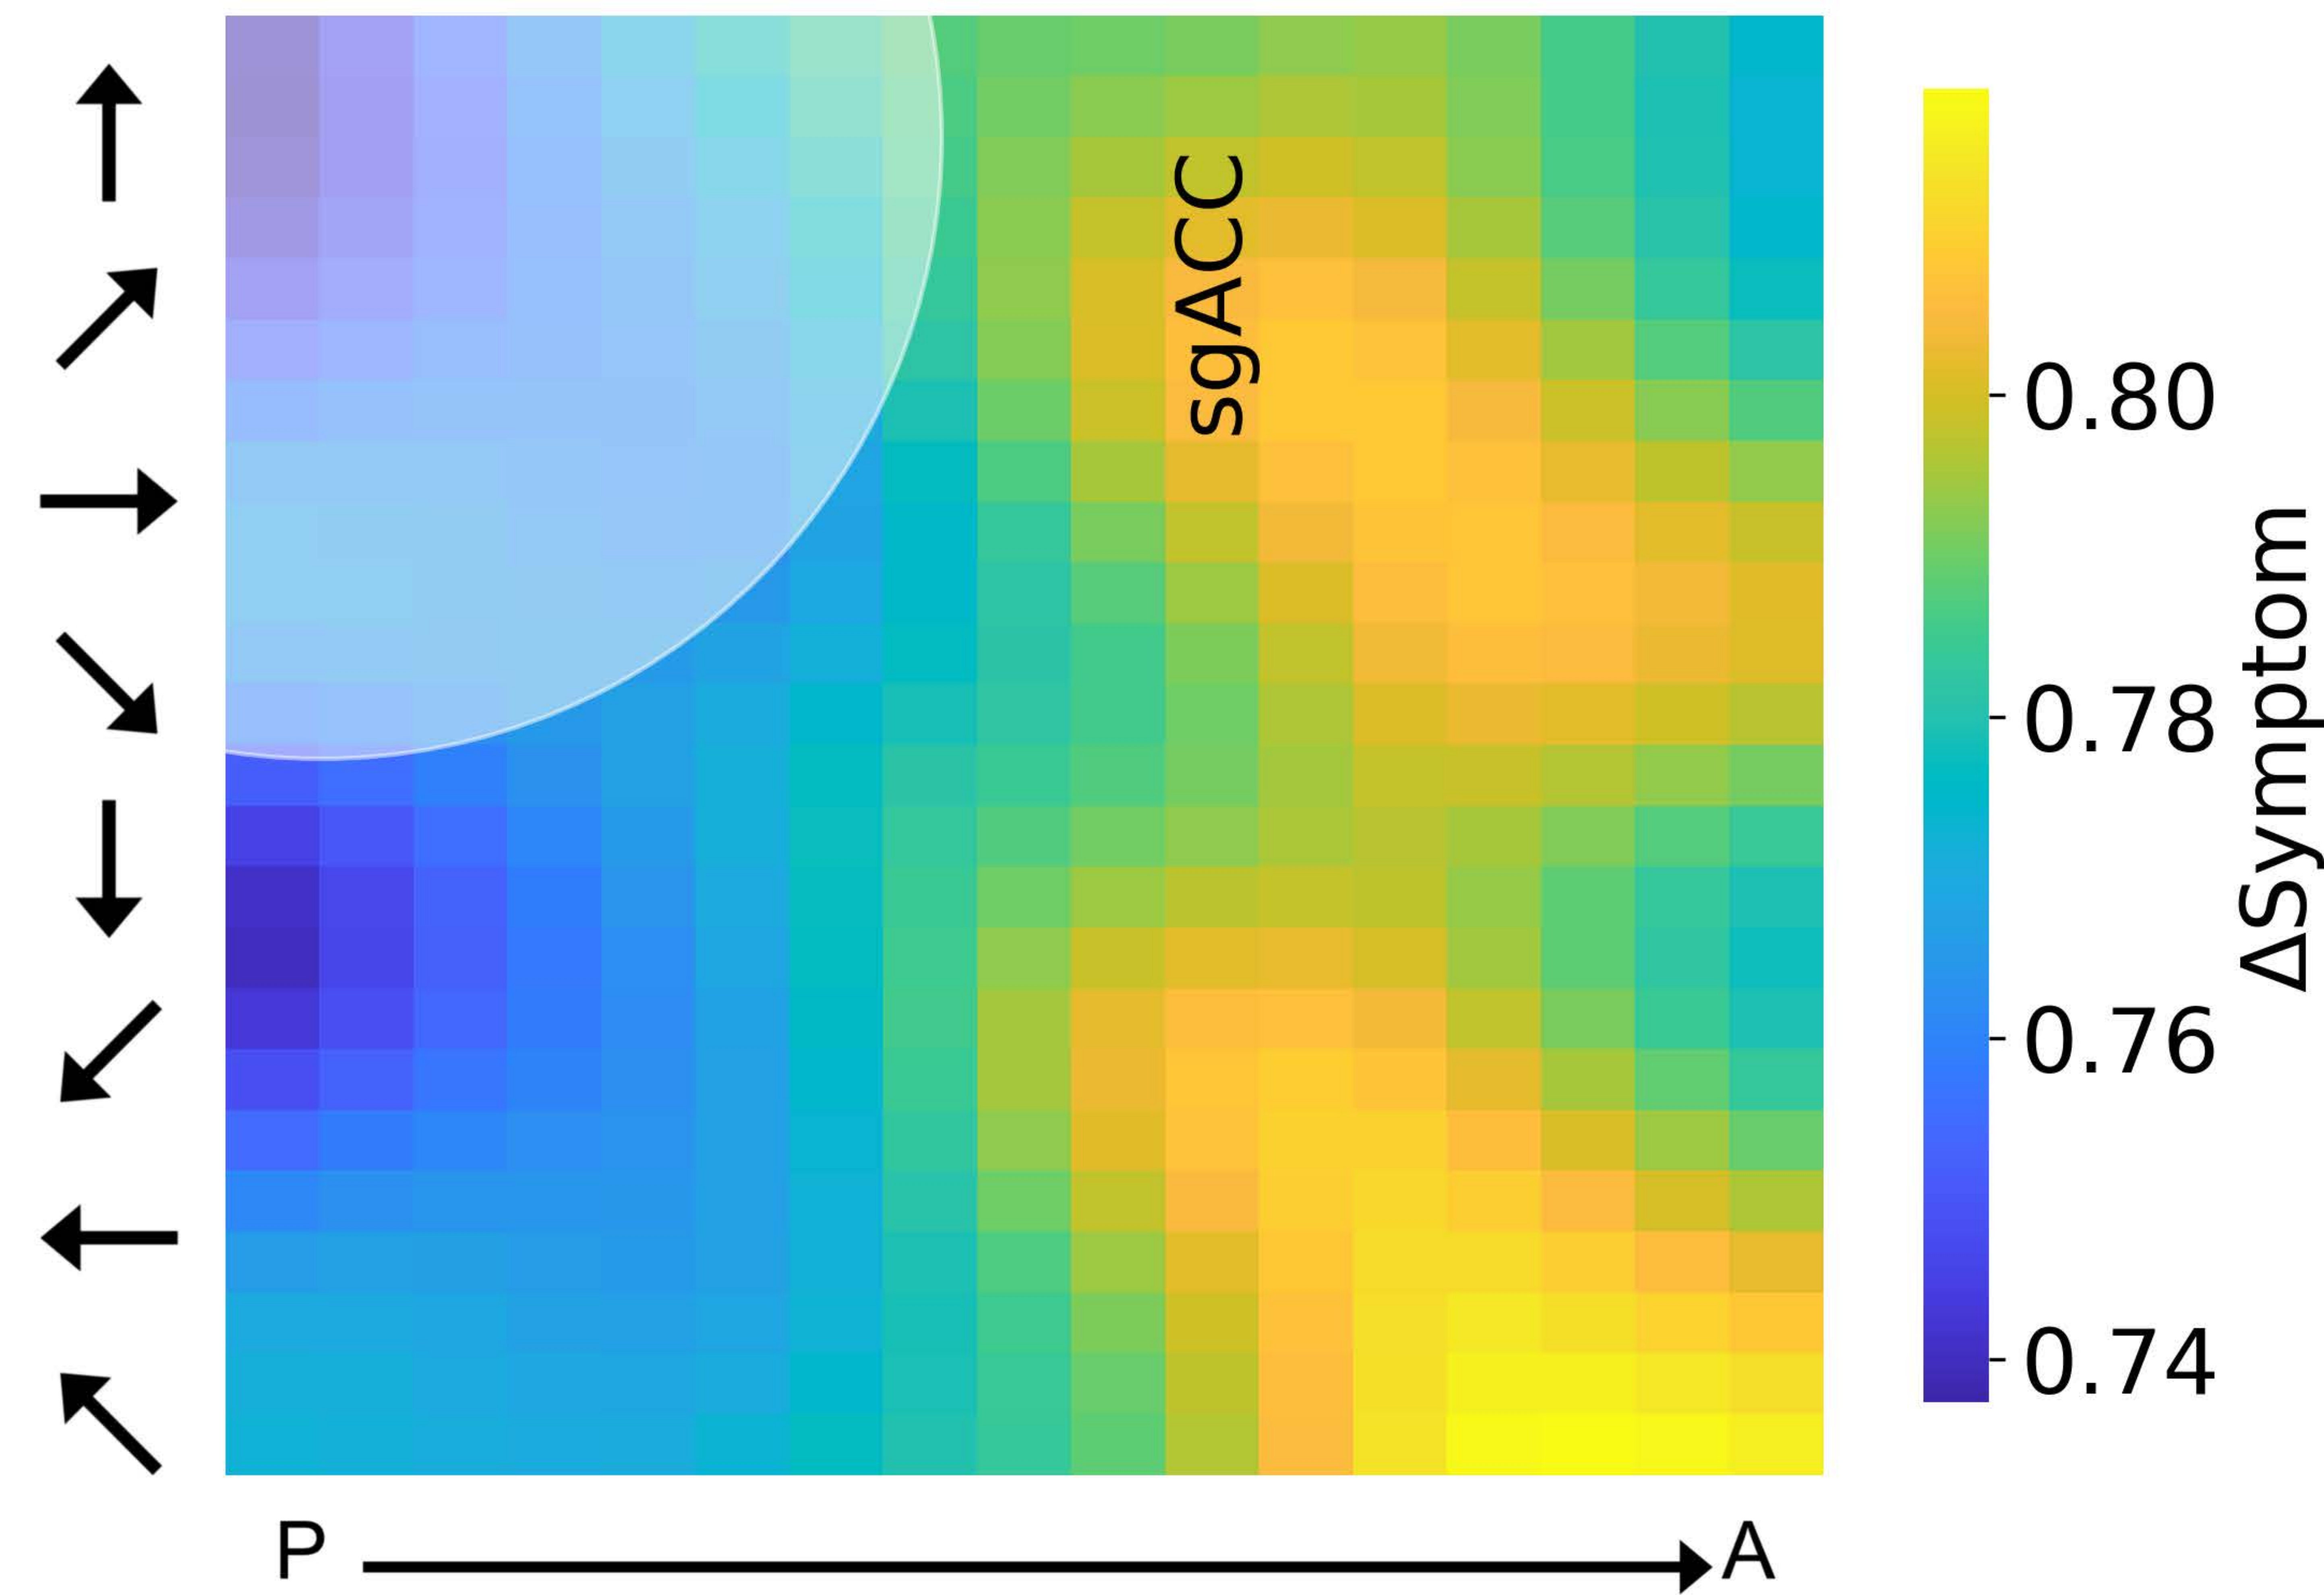



# NDARZW884MZC\_madrs\_right\_dlpfc

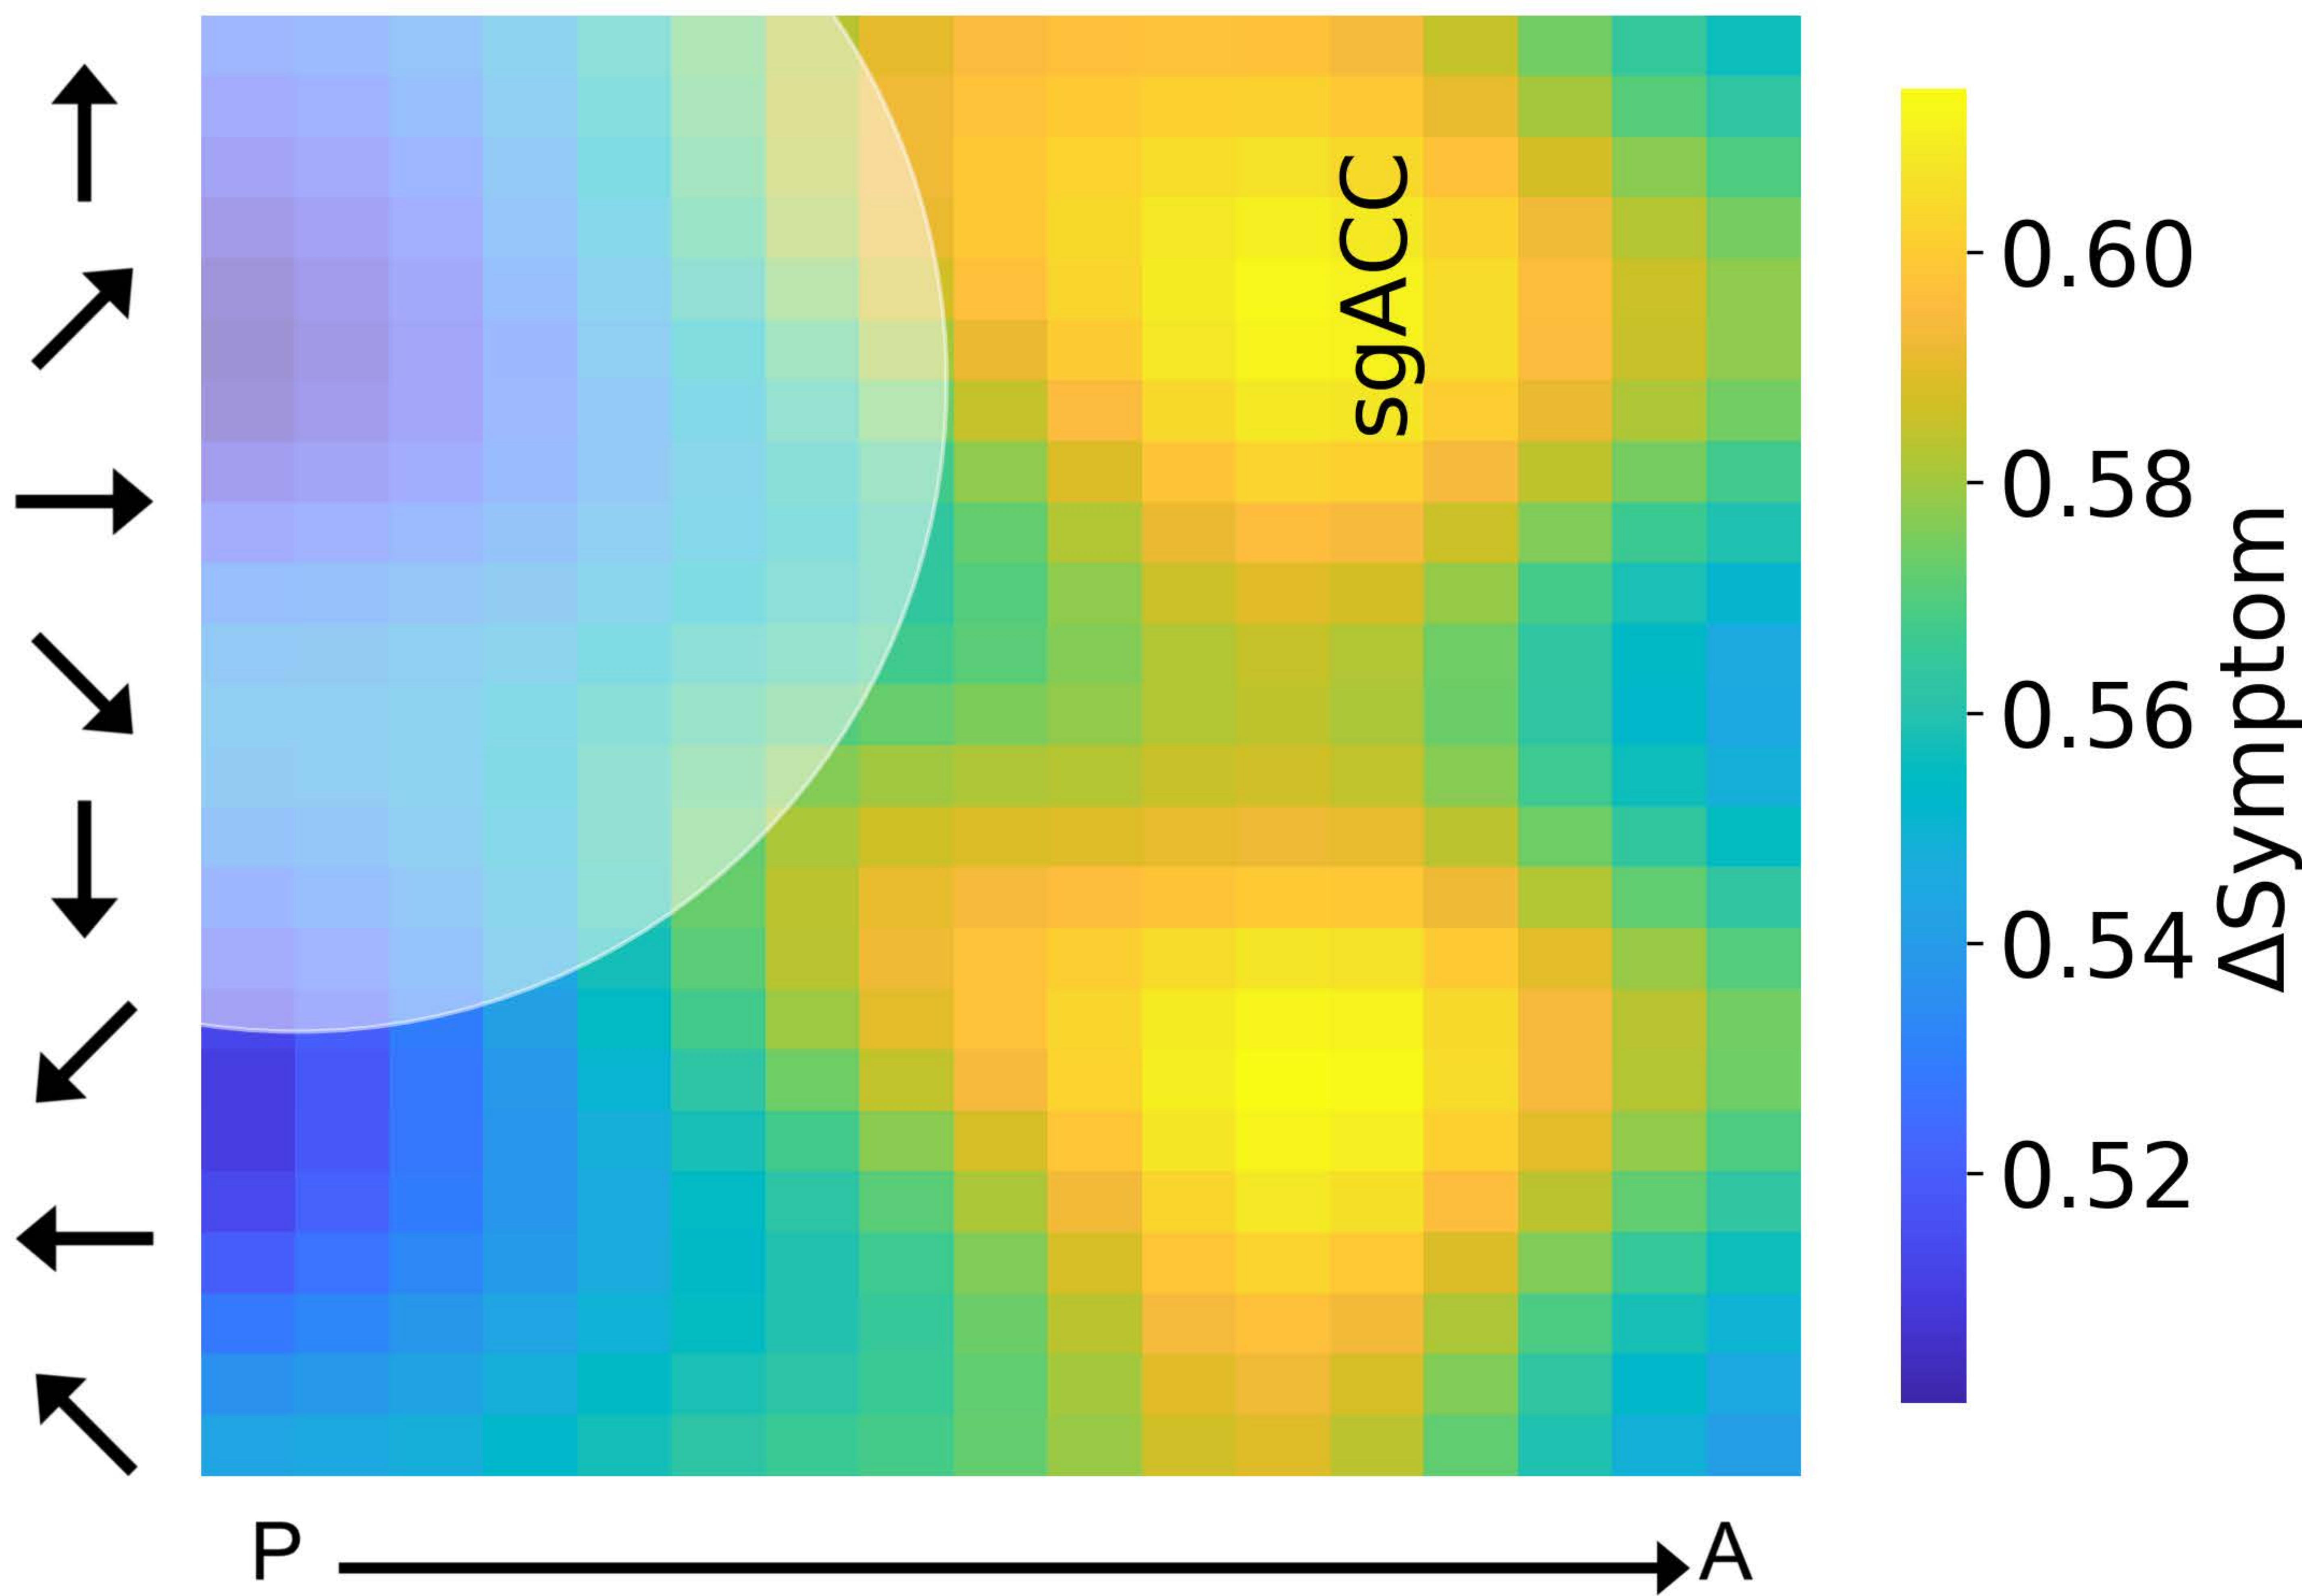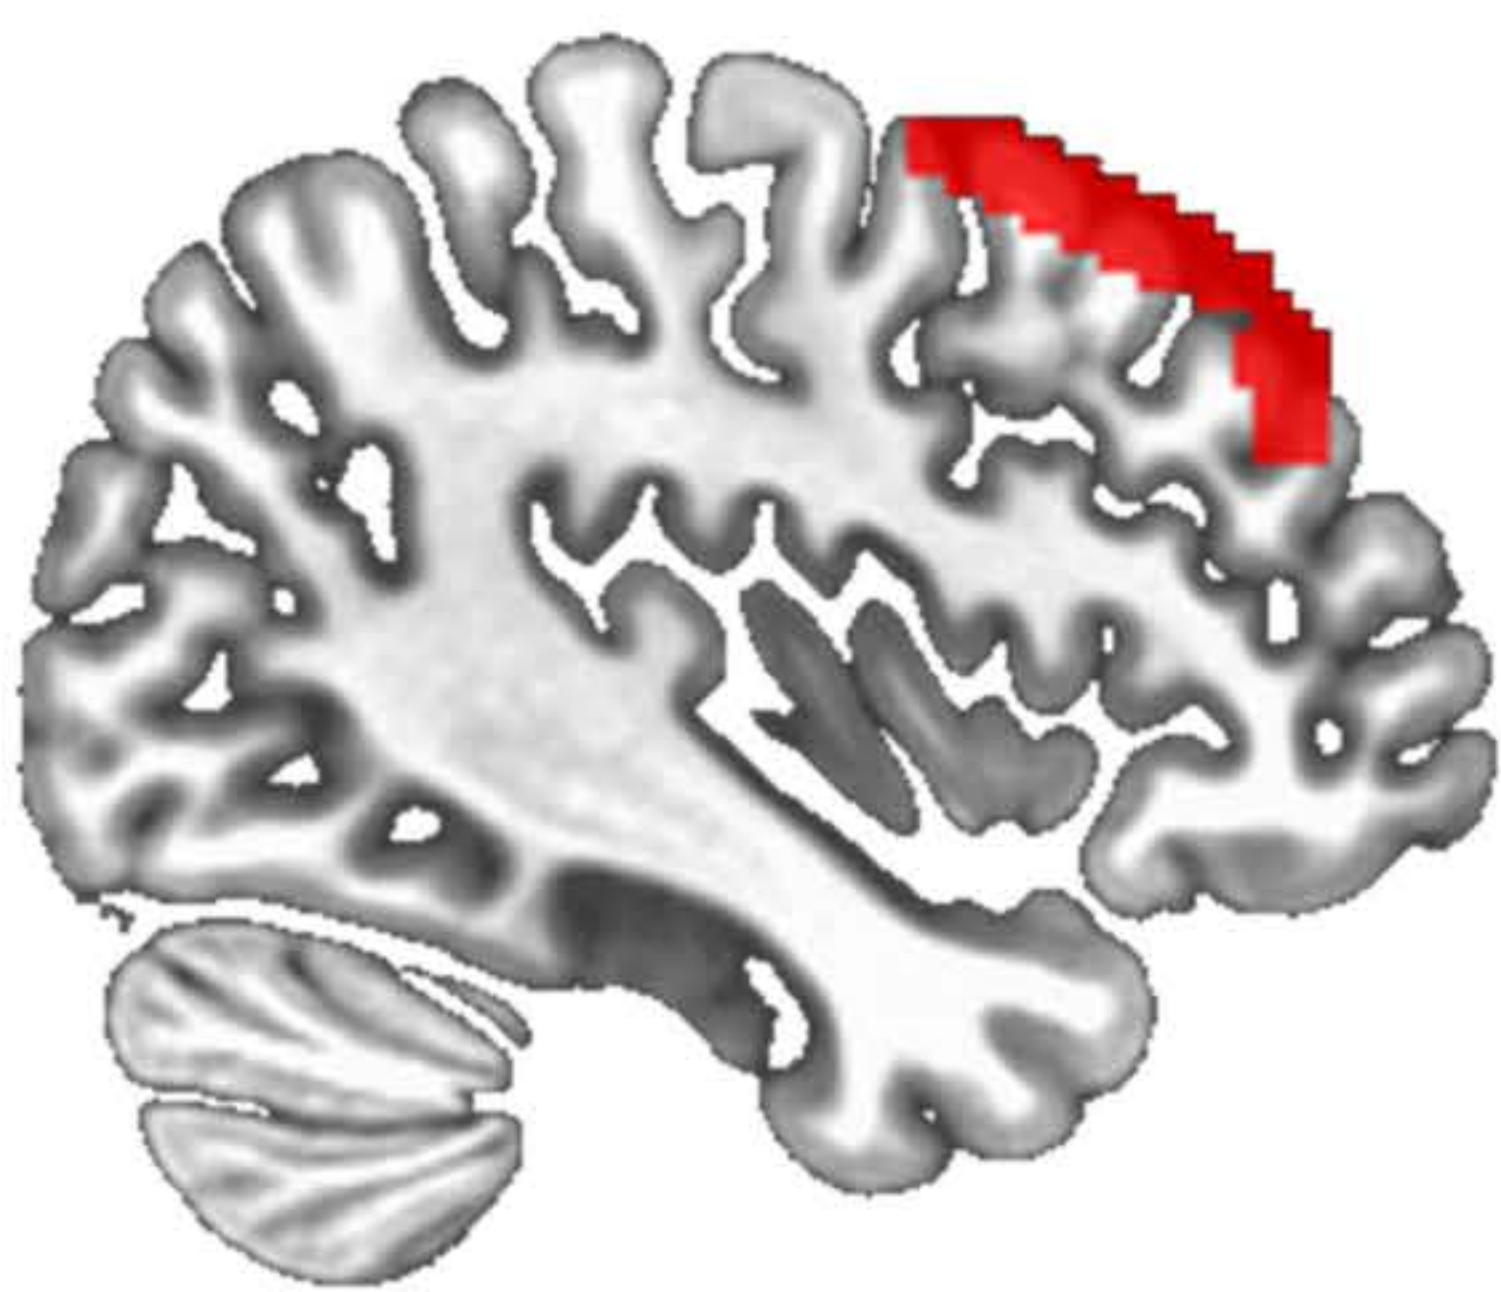



# NDARAC286ZE7\_hamd\_left\_dlpfc

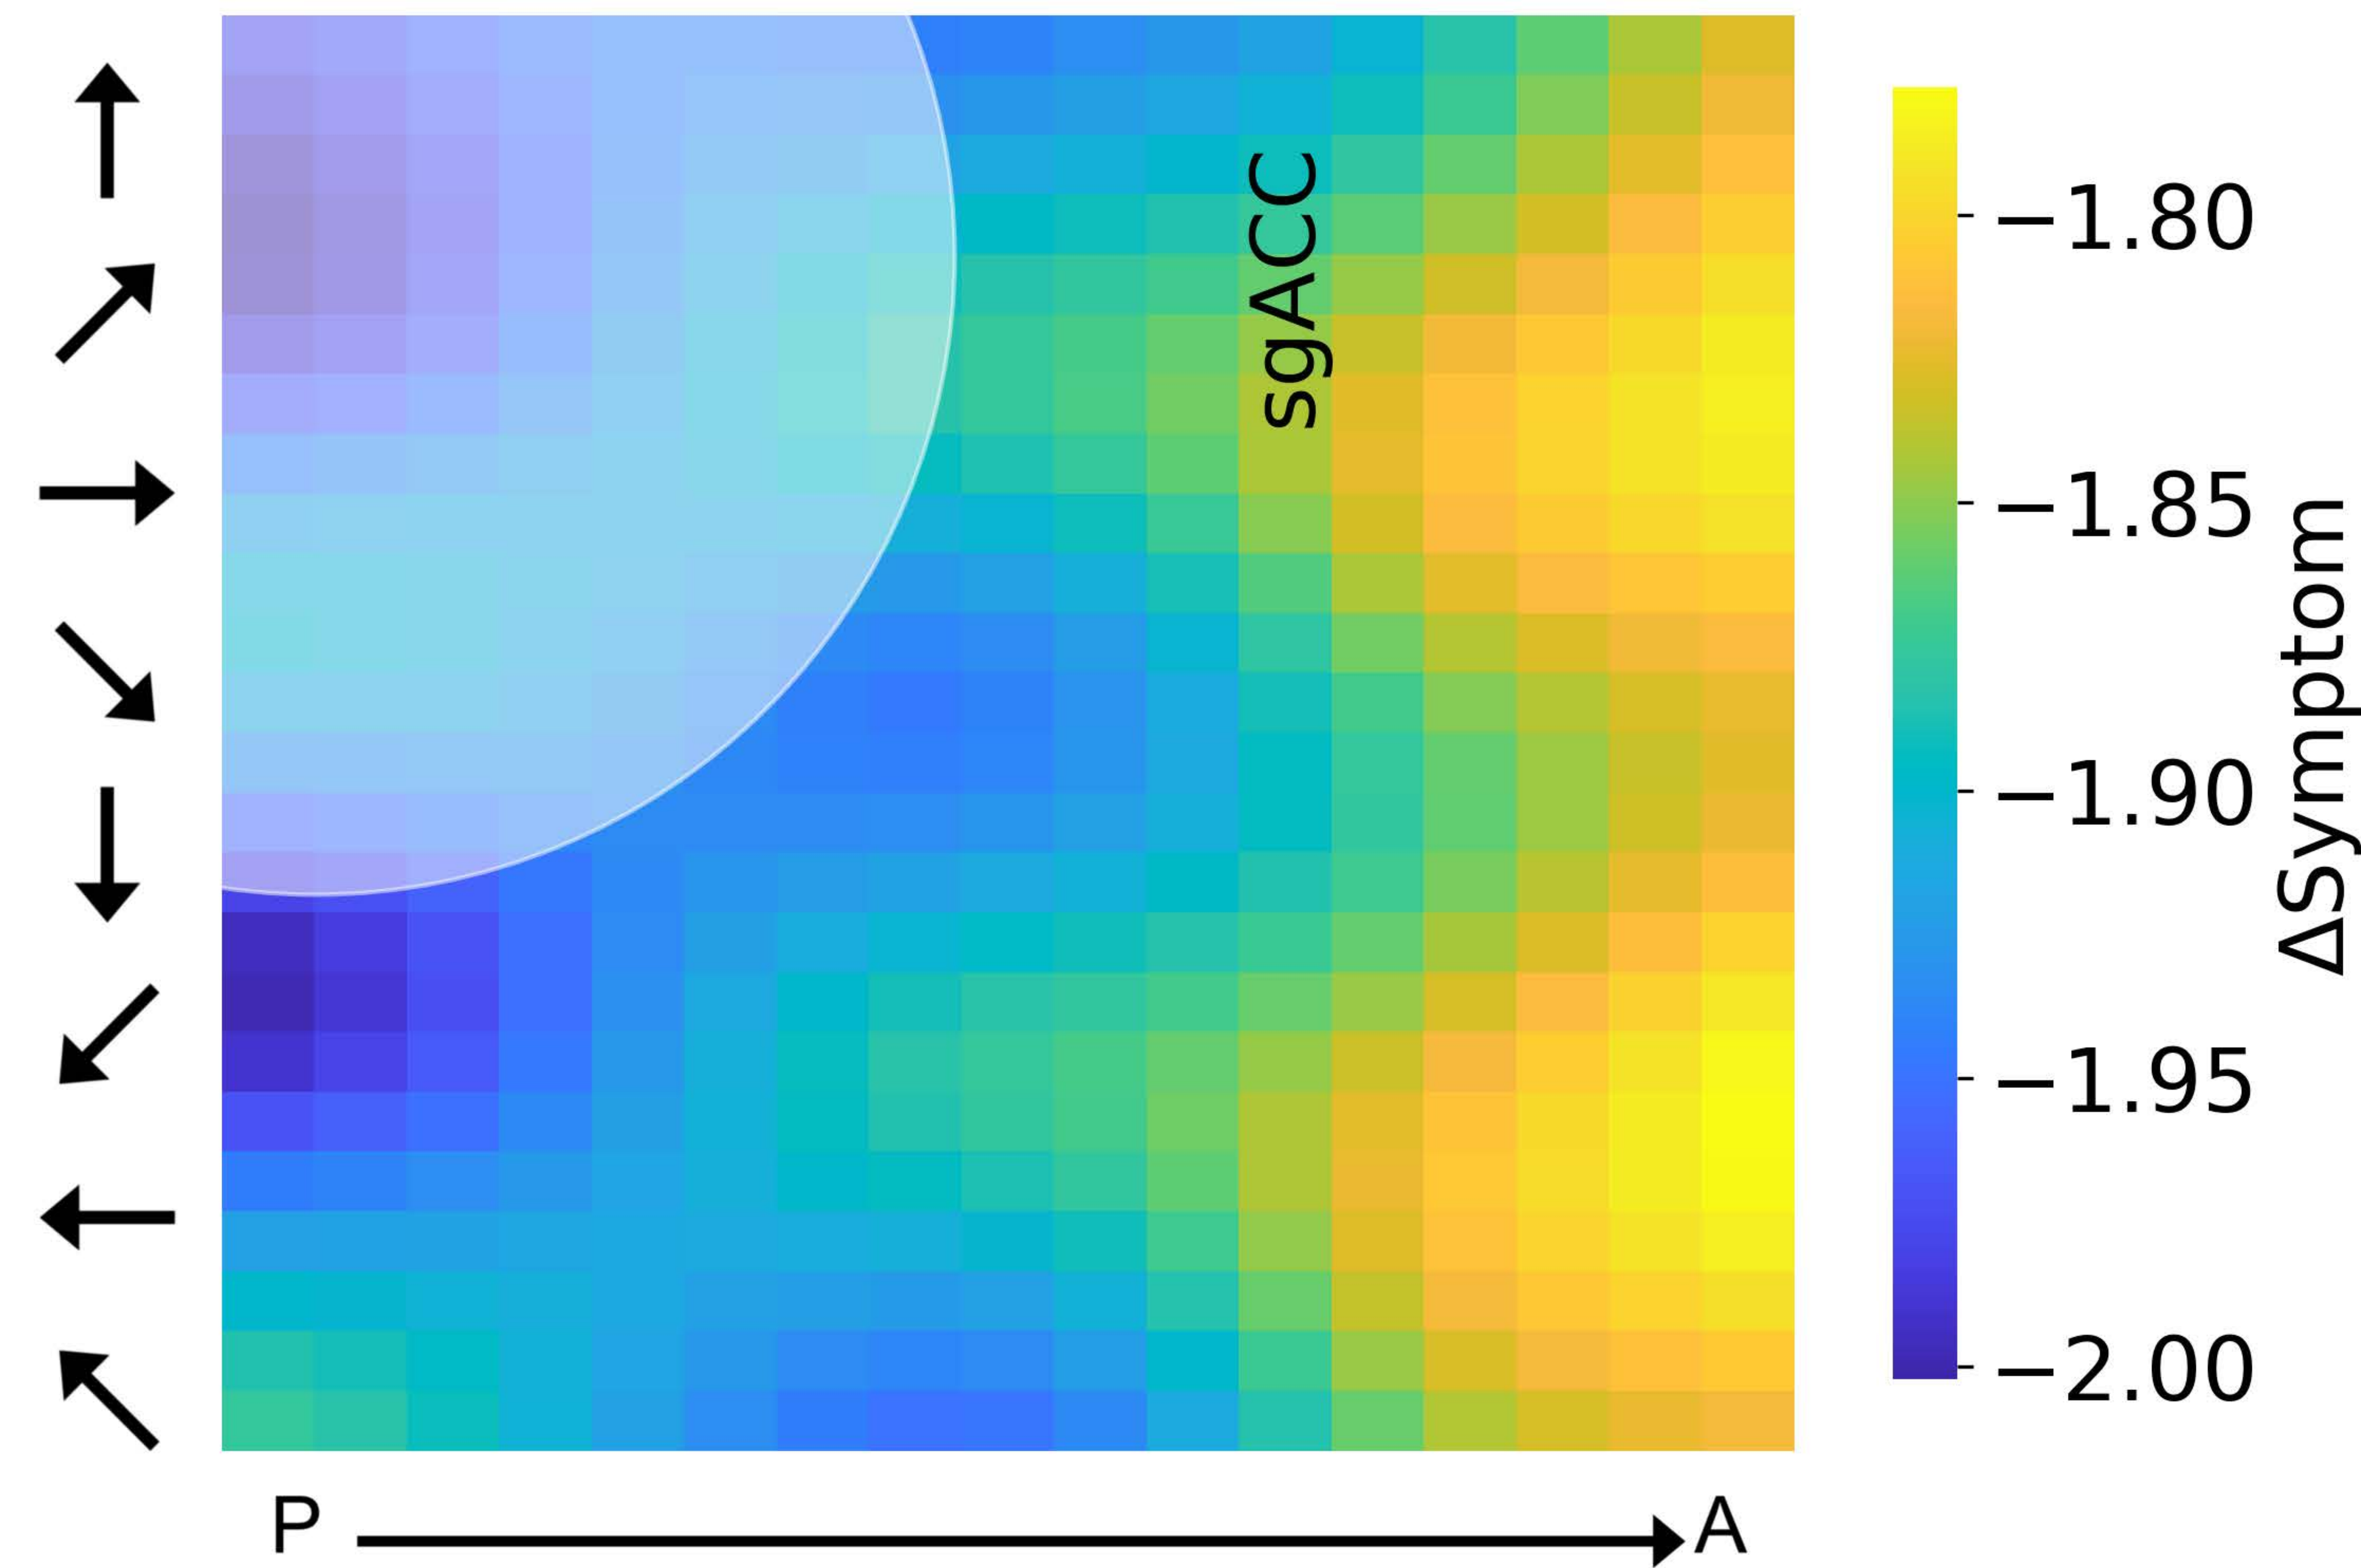



# NDARAC789HEZ\_hamd\_left\_dlpfc

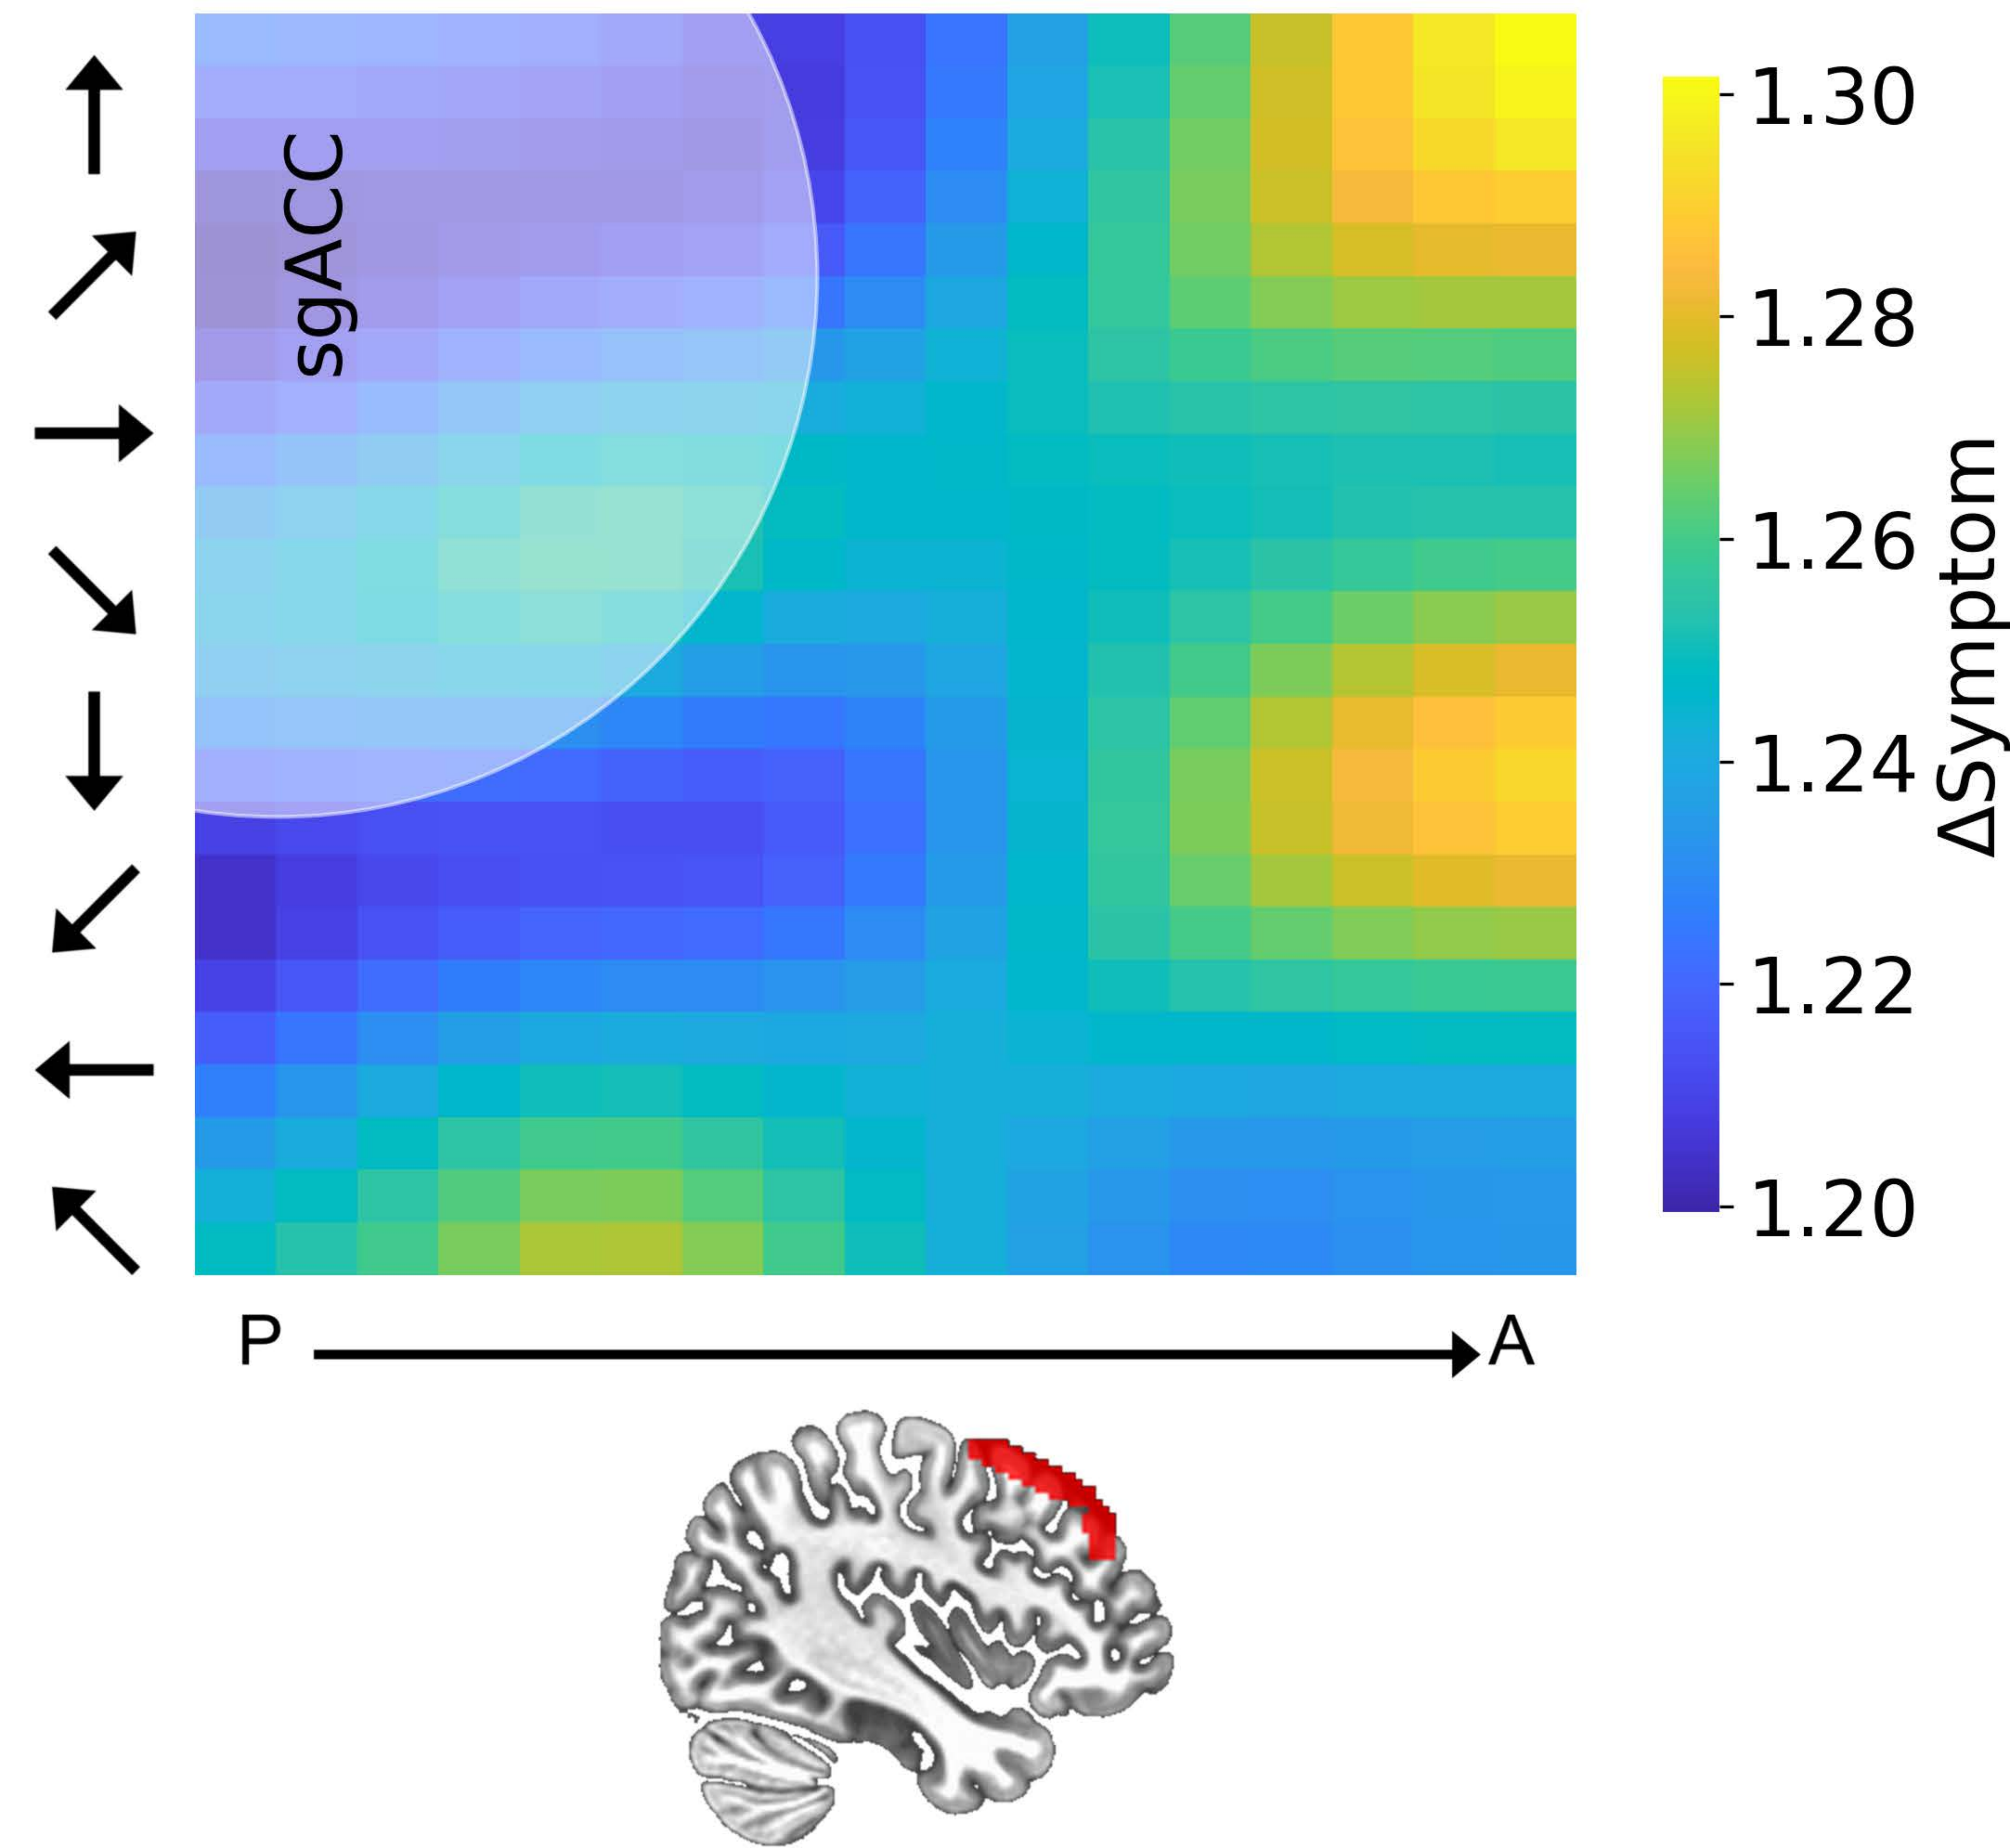



# NDARBD224PBF\_hamd\_left\_dlpfc

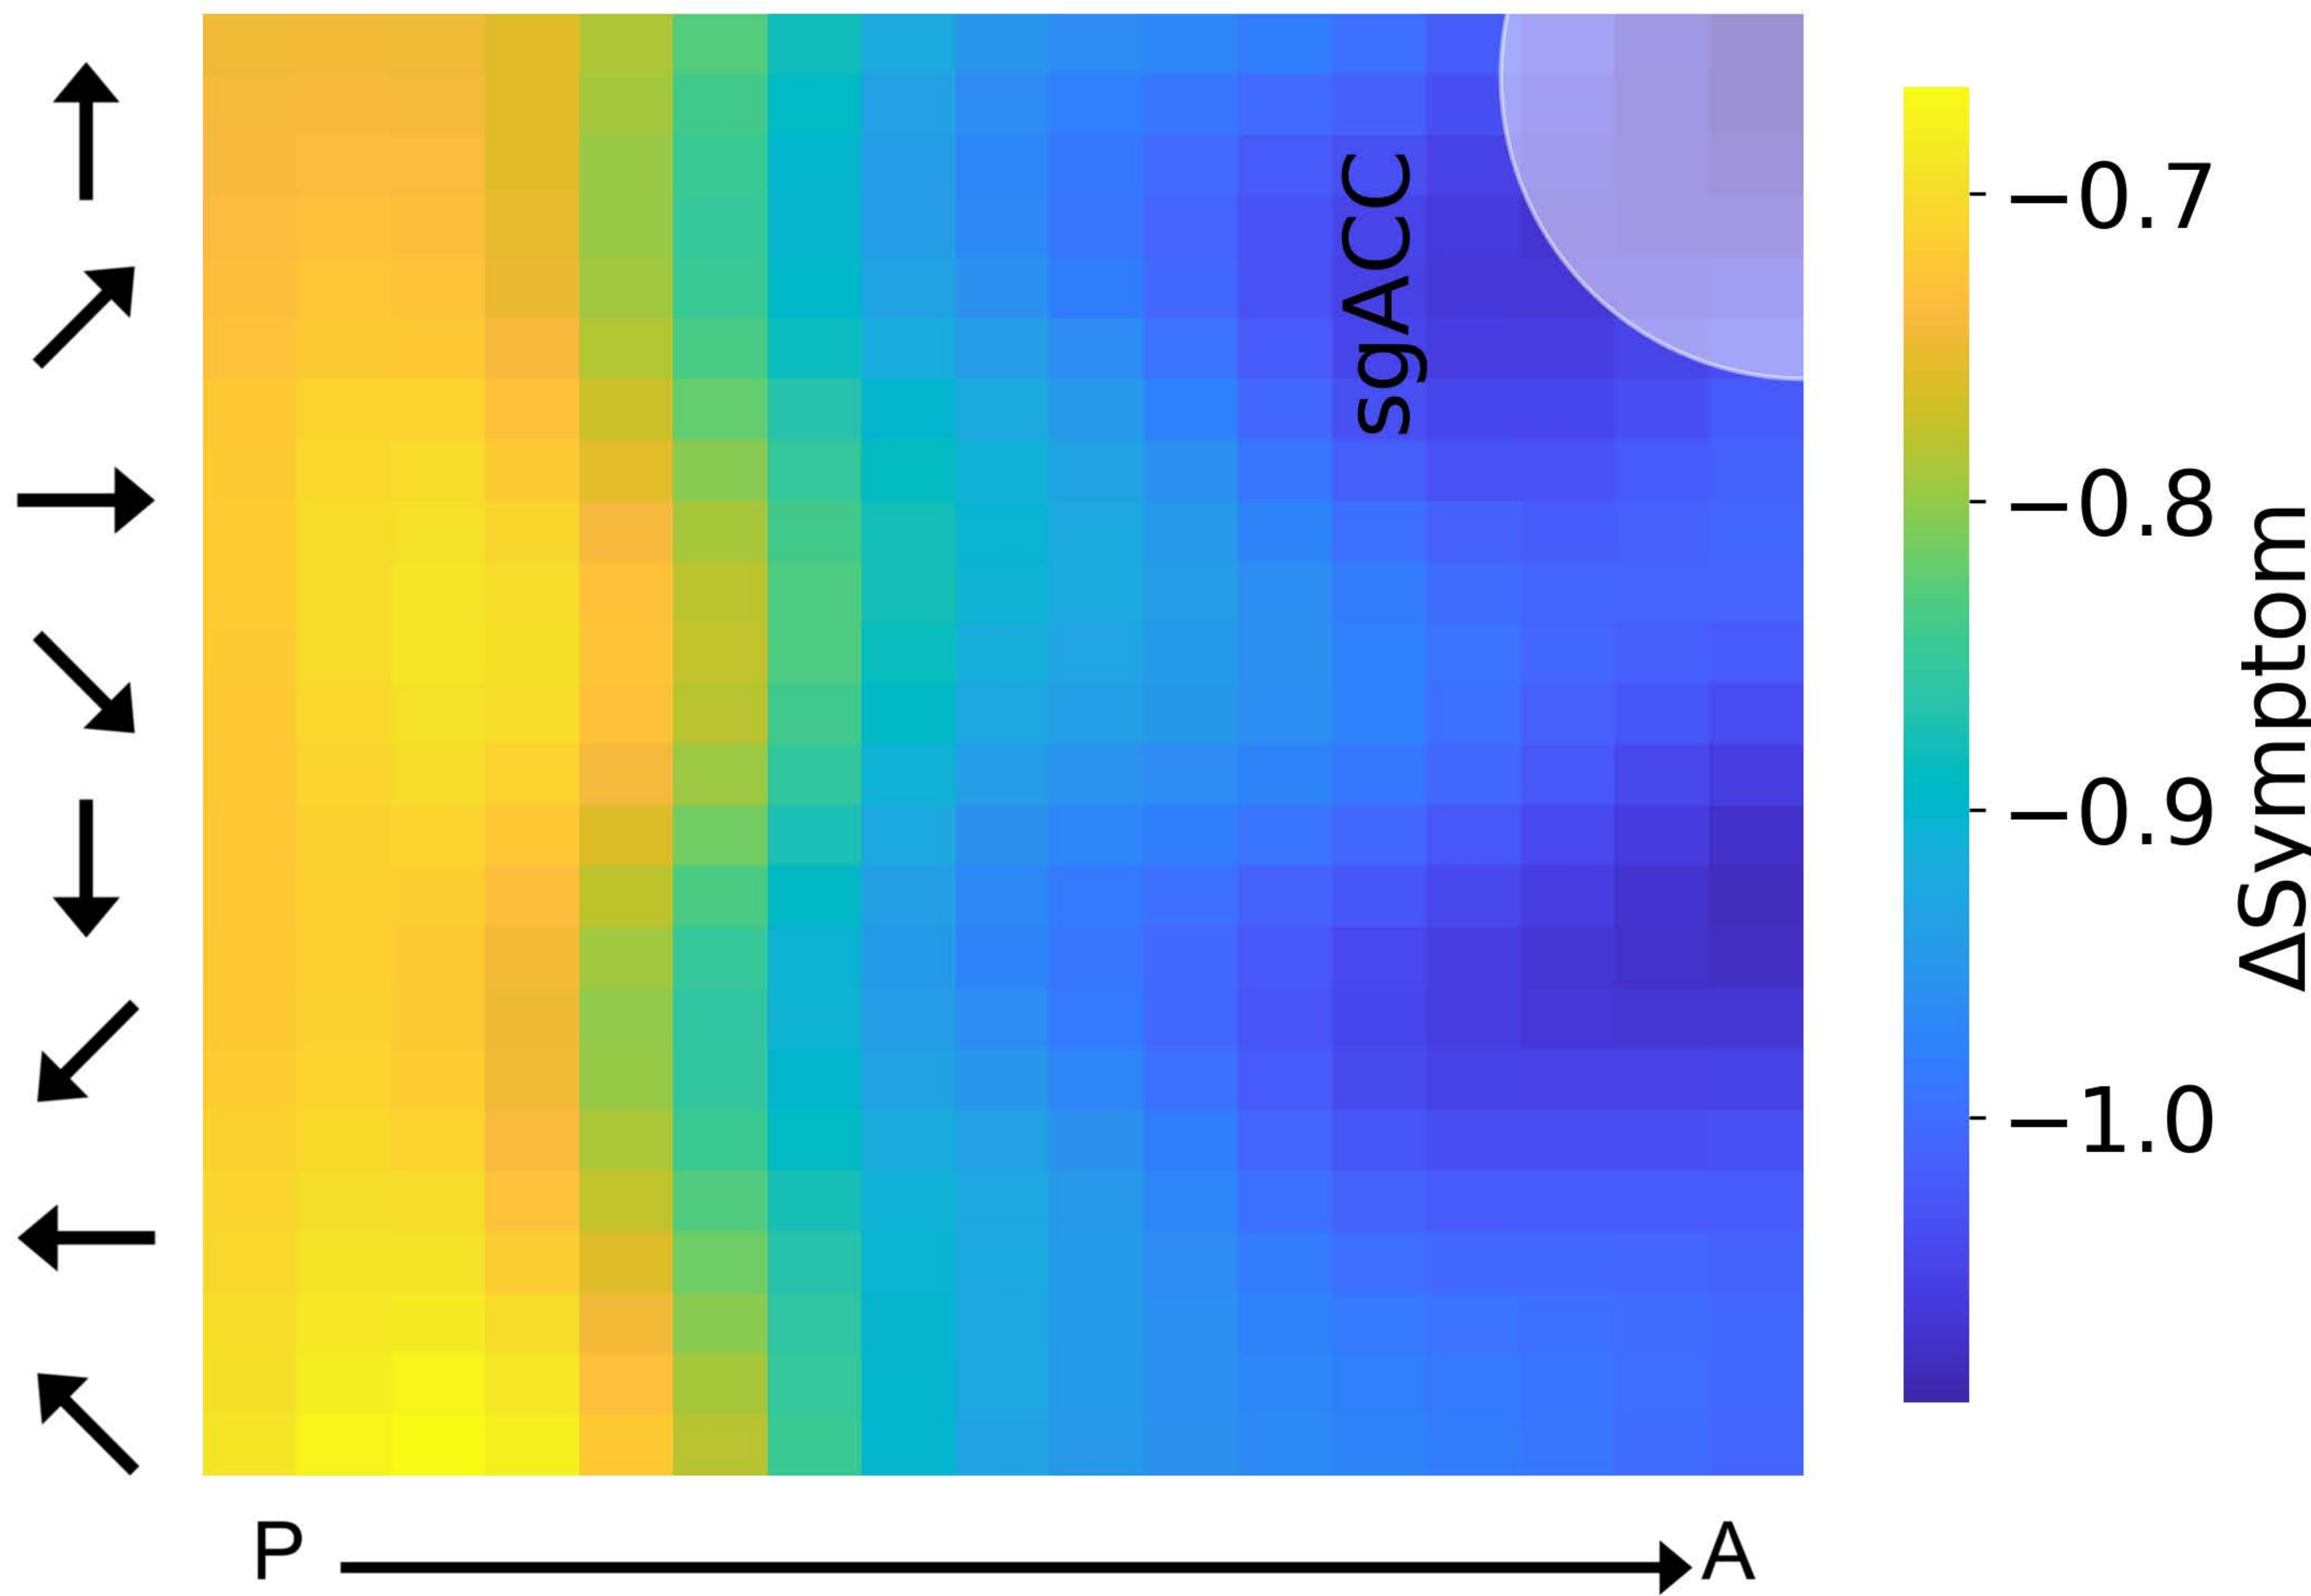



# NDARBF292NPE\_hamd\_left\_dlpfc

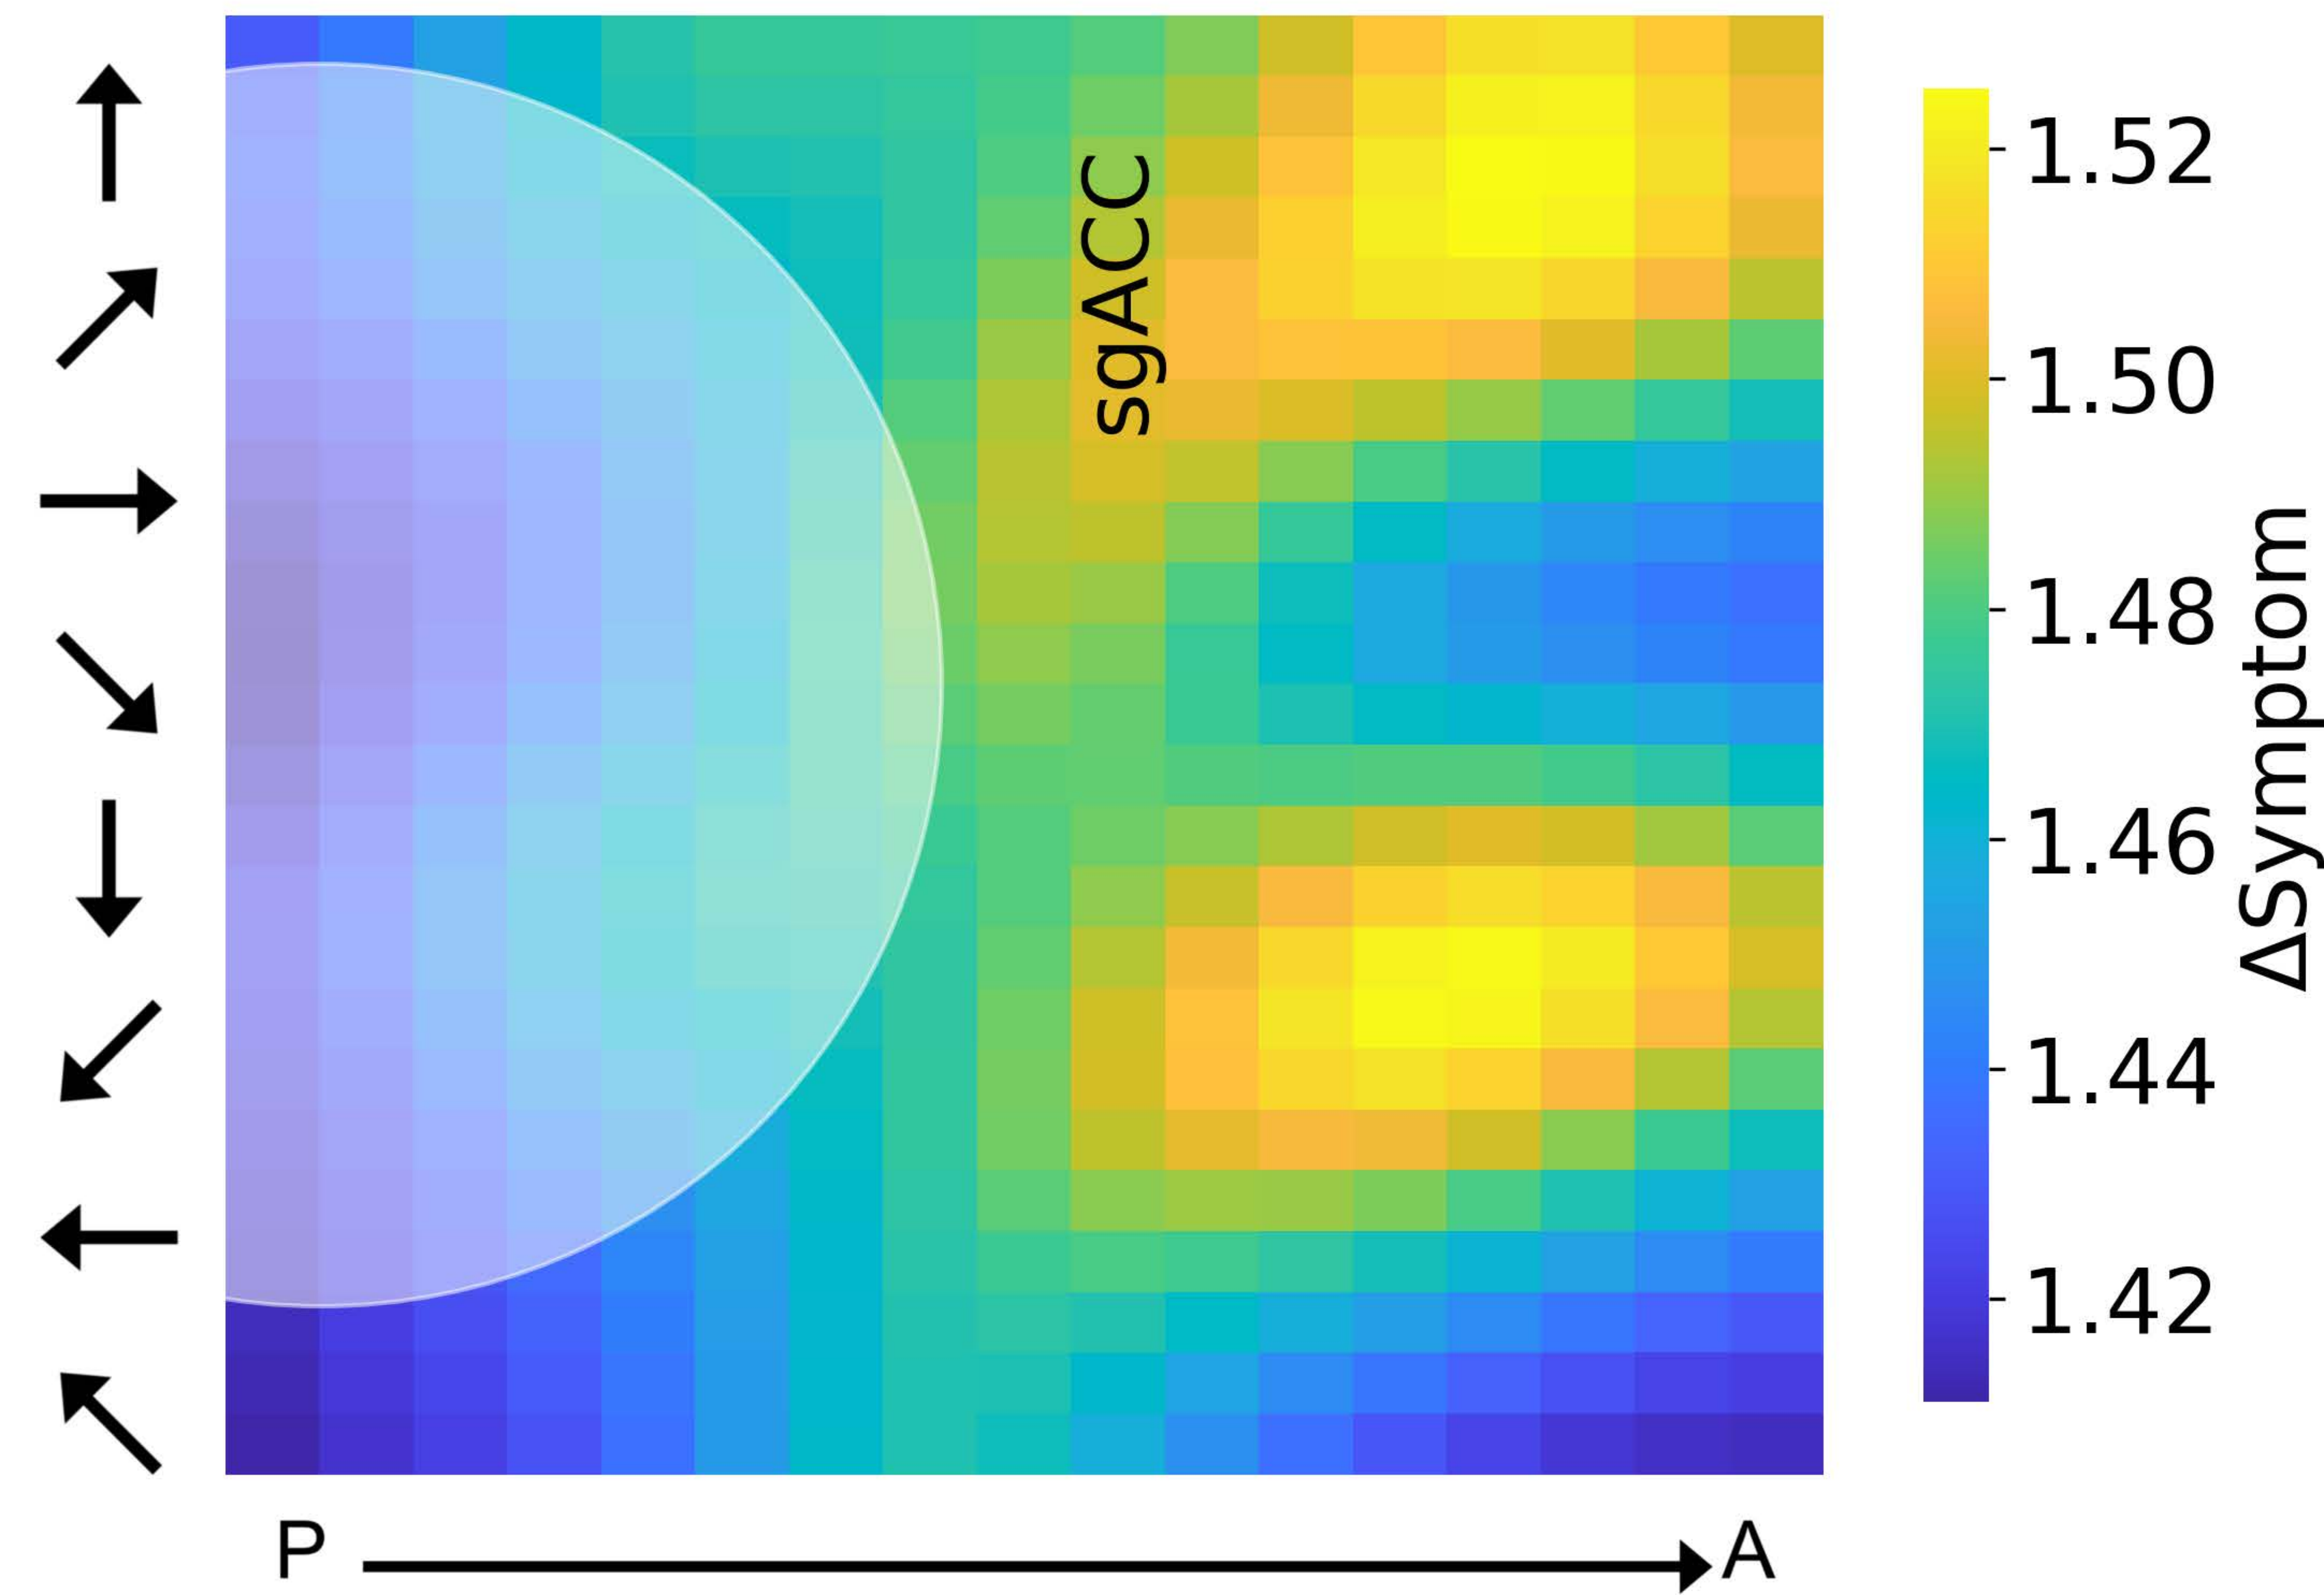



# INDARCG535CPC\_hamd\_left\_dlpfc

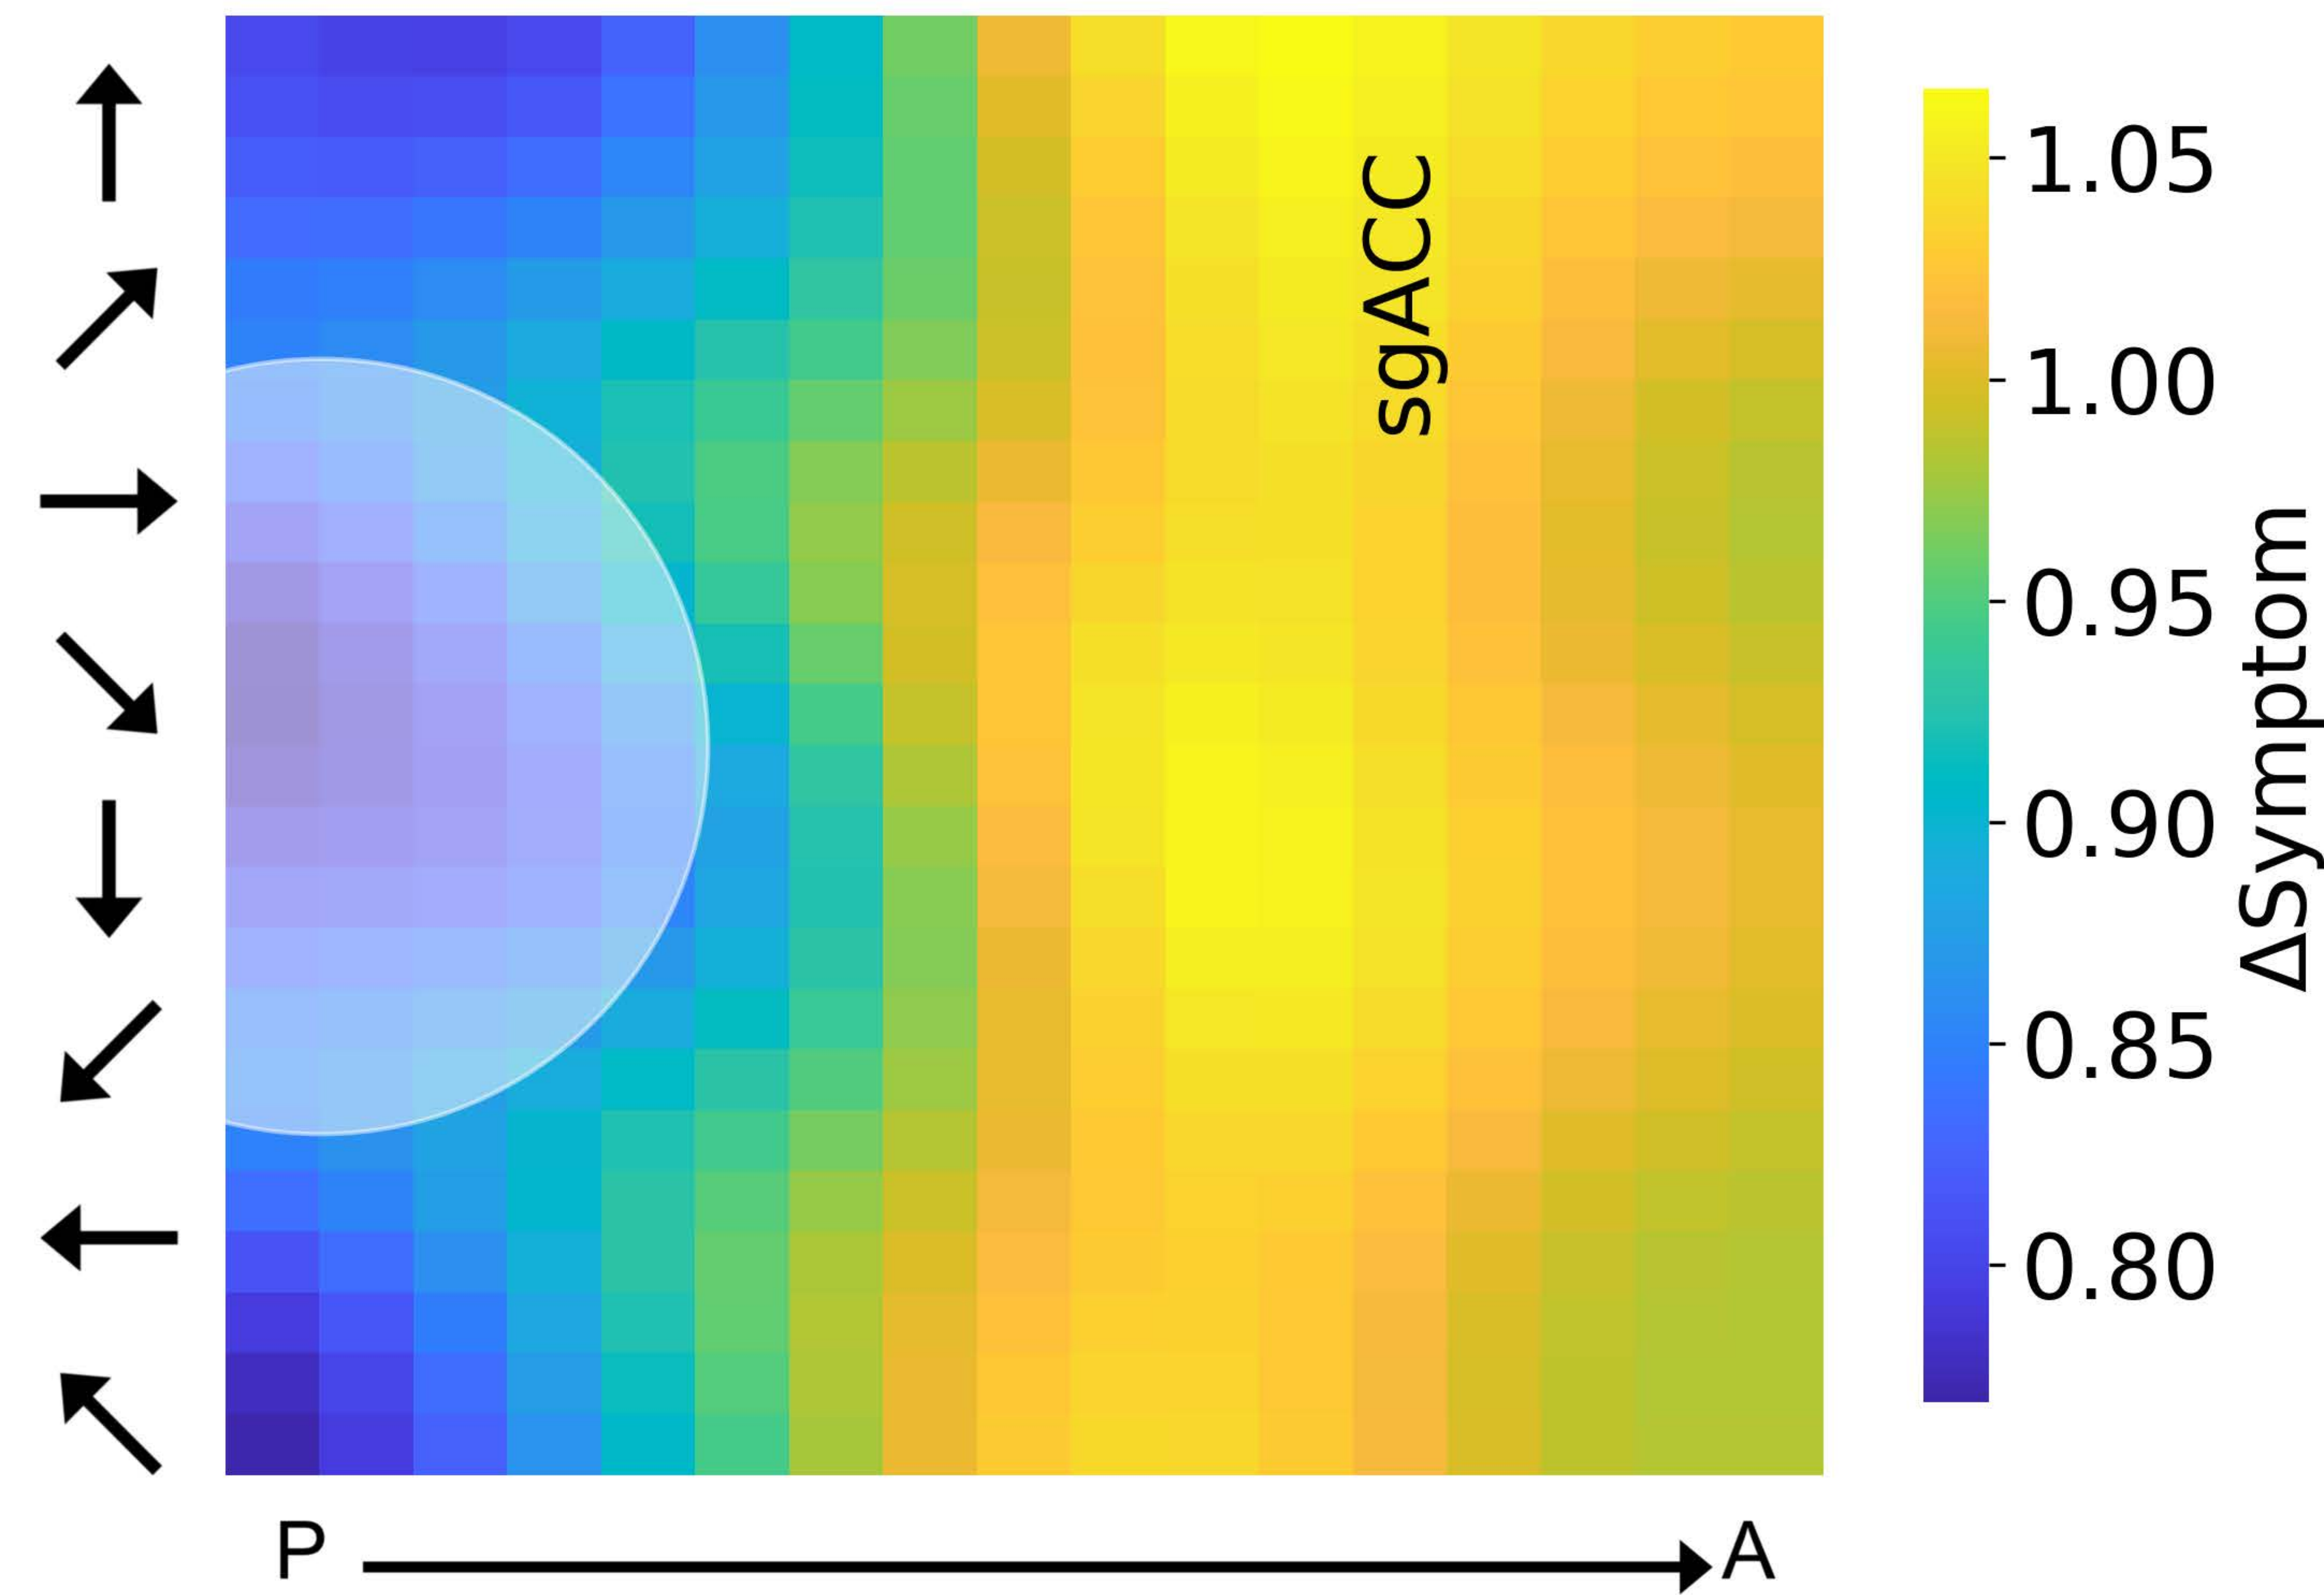



# INDARC406TU1\_hamd\_left\_dlpfc

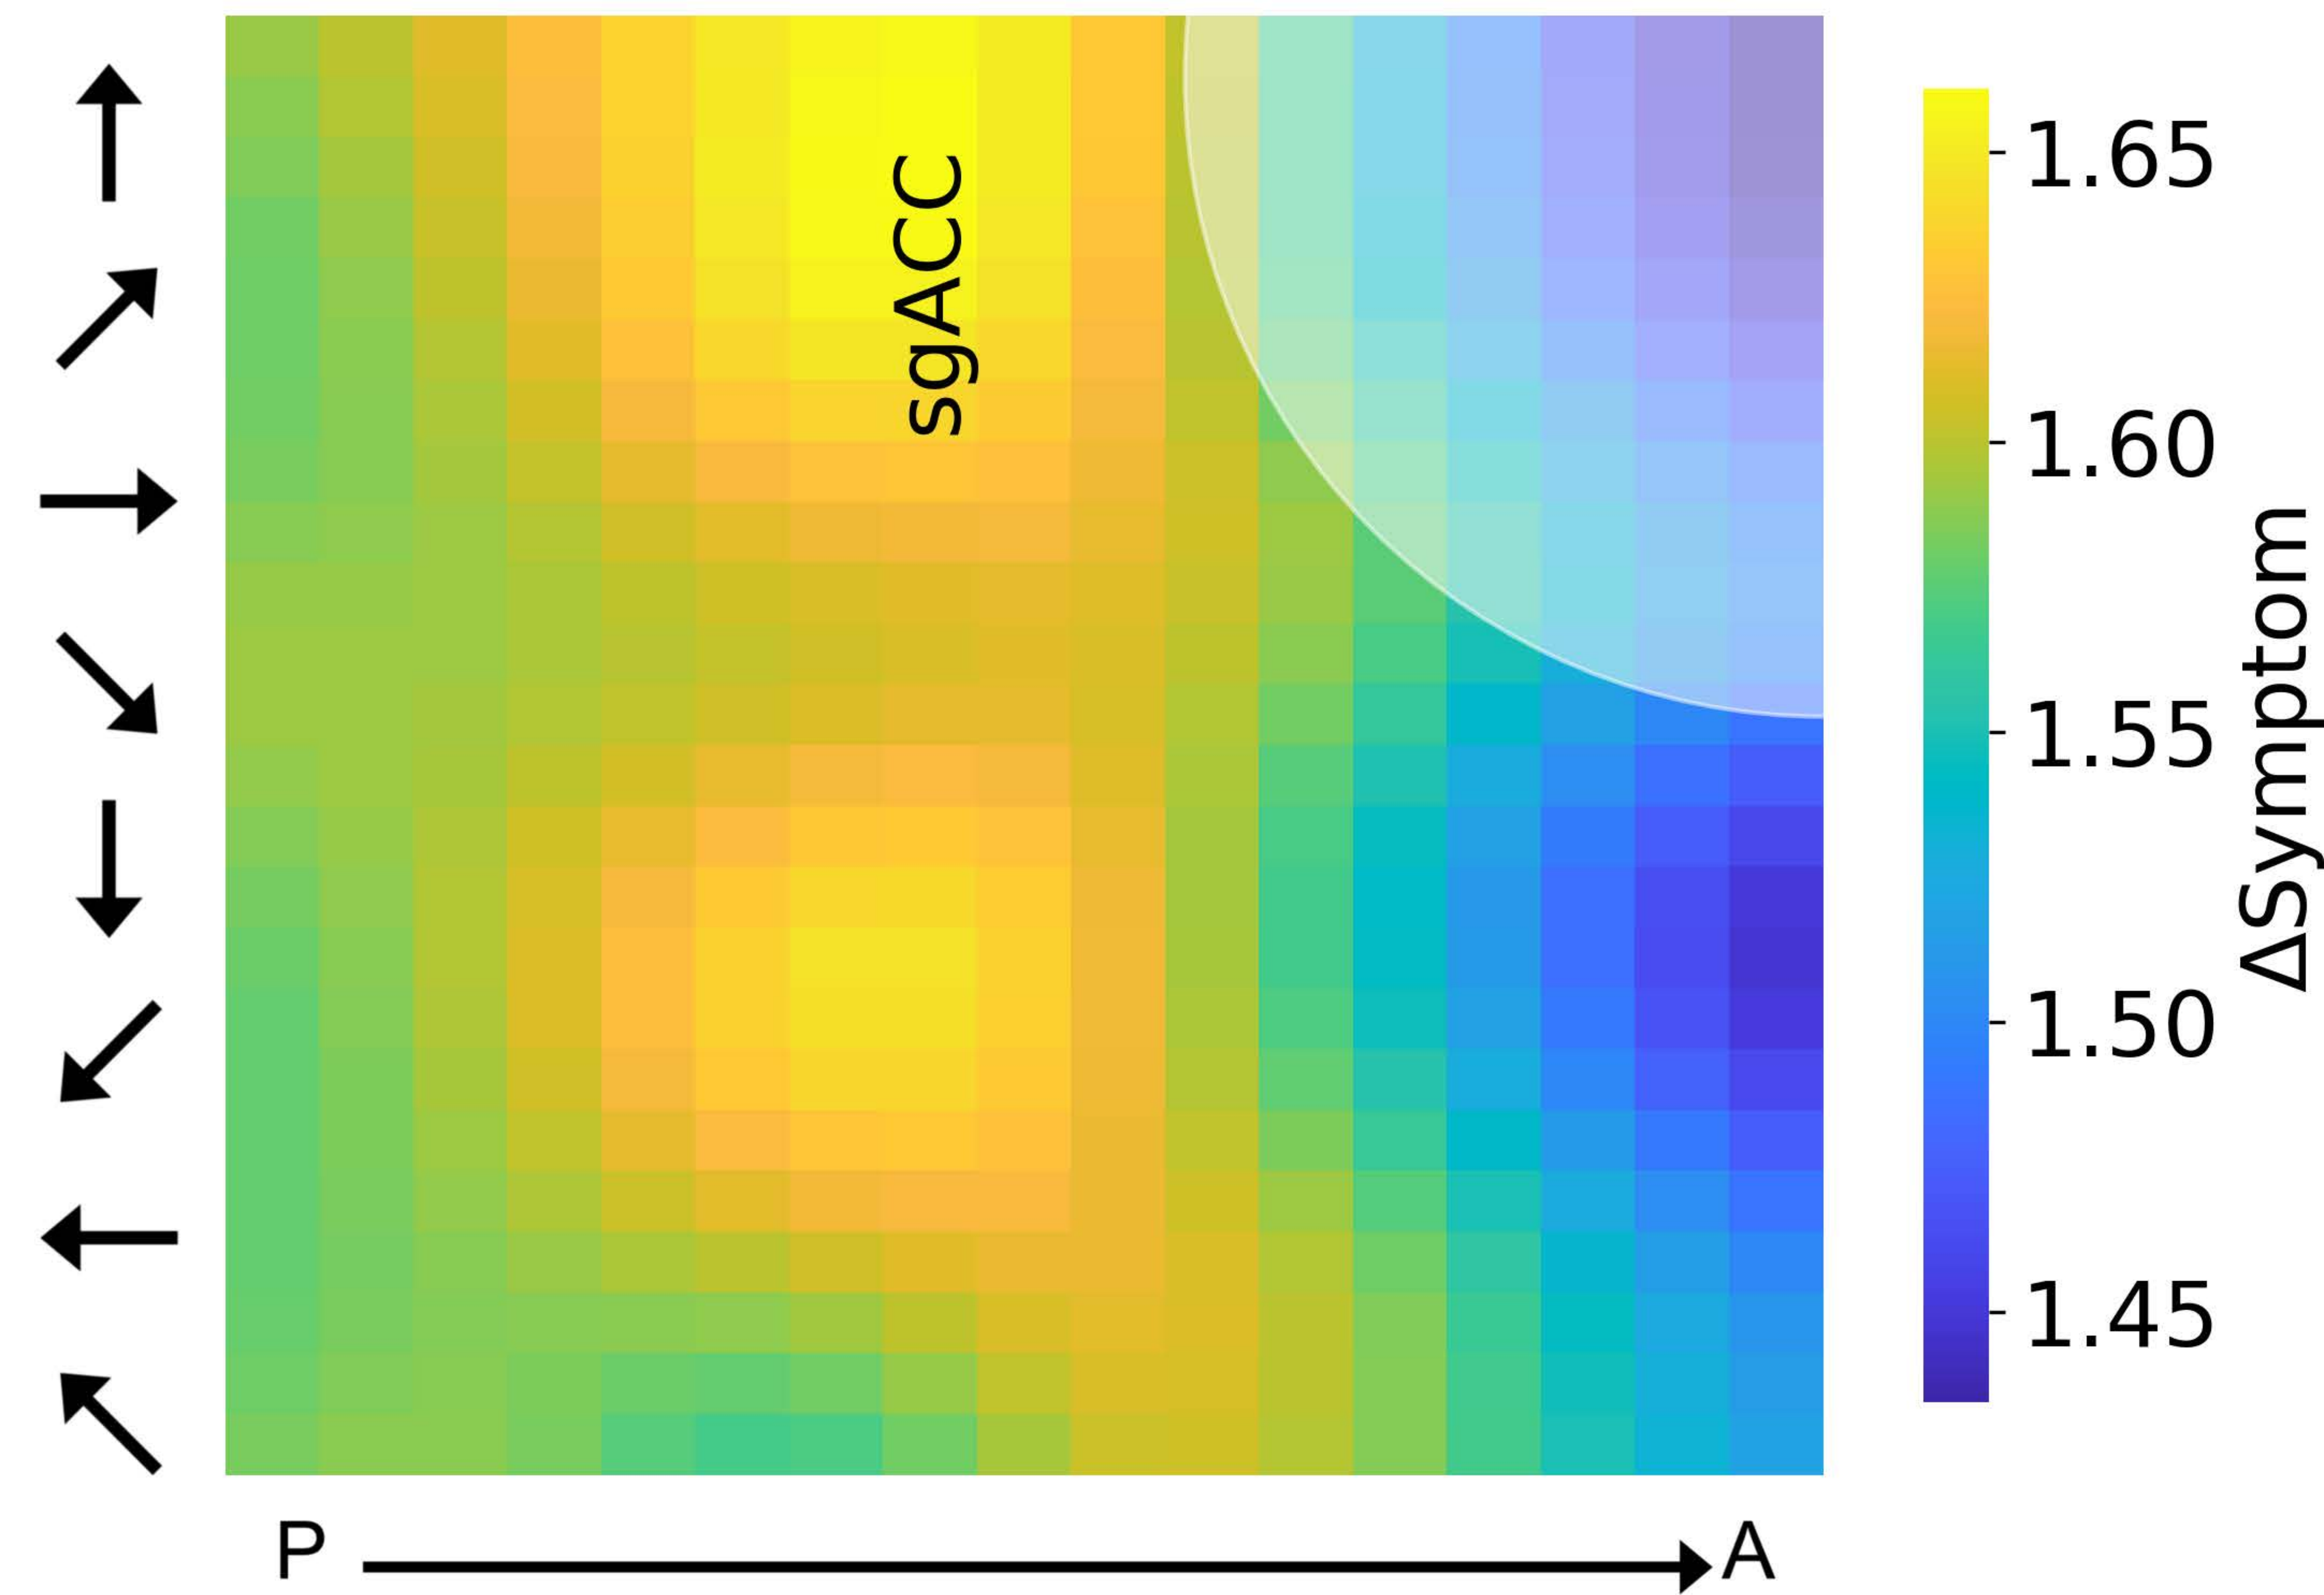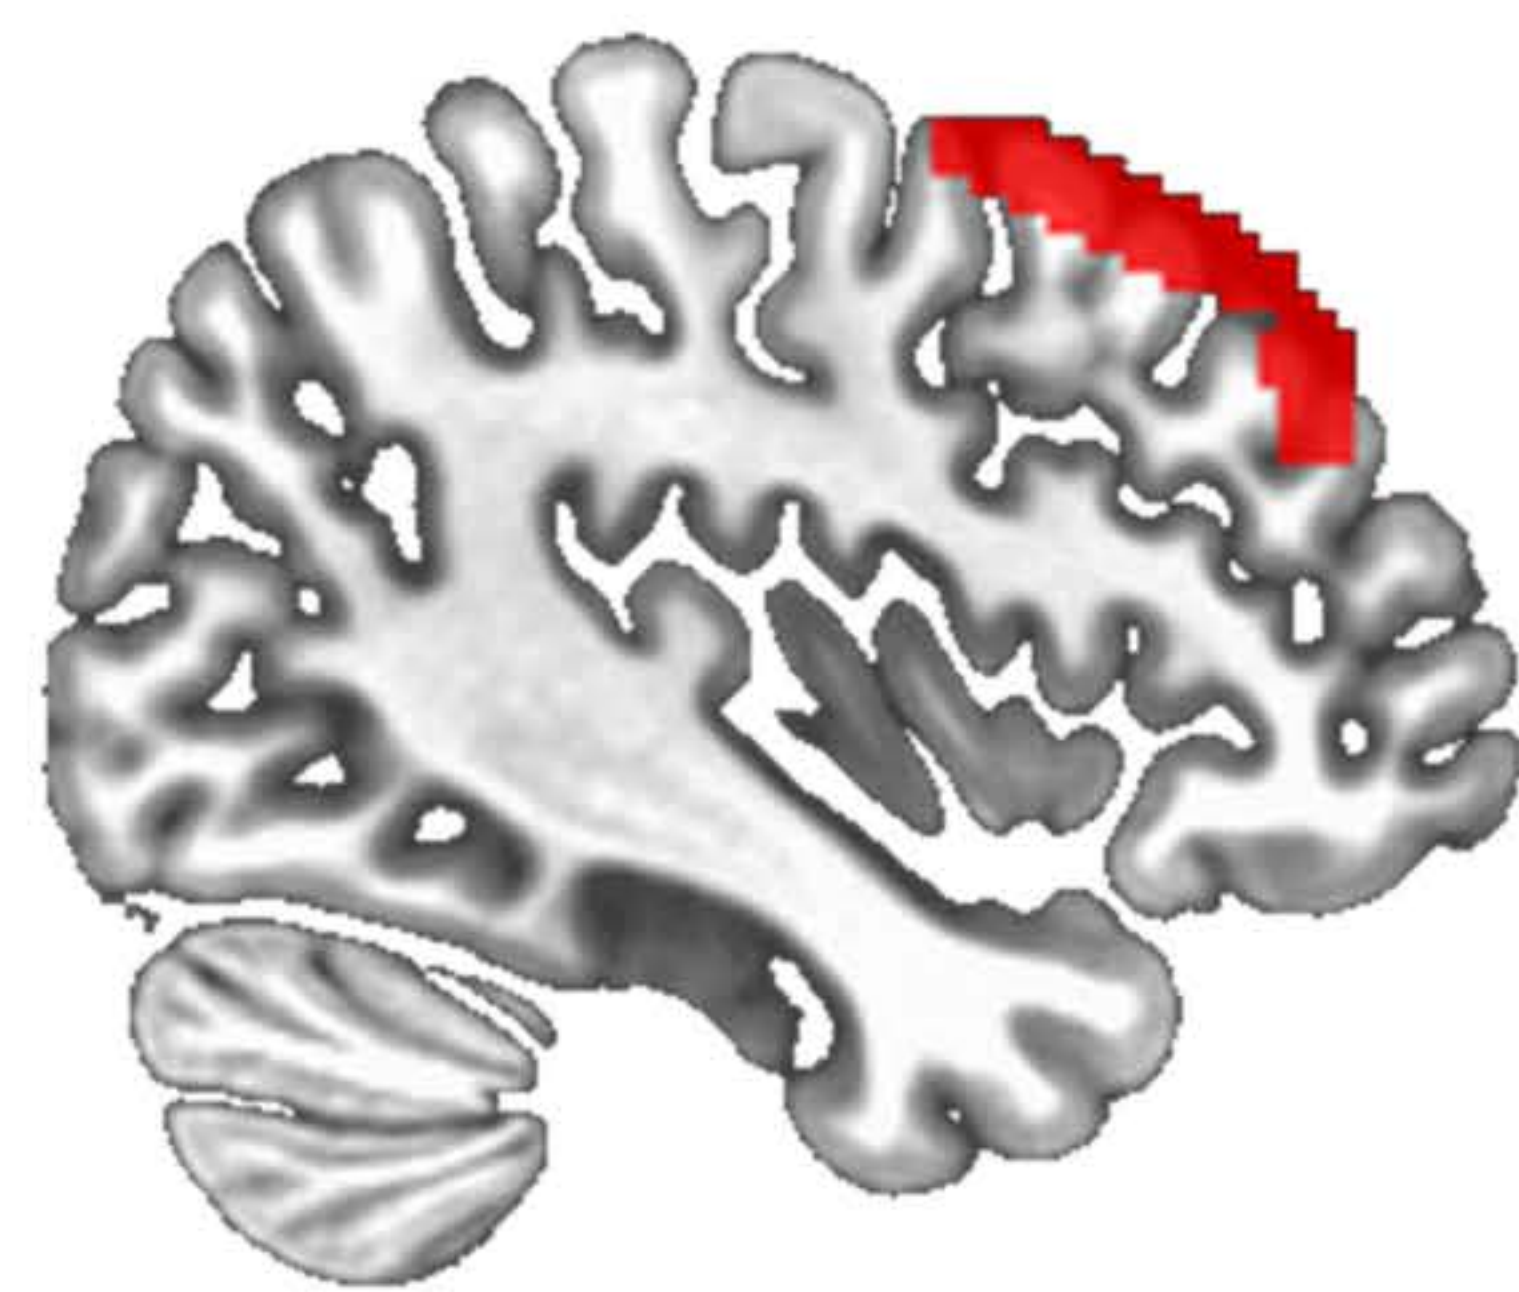



# INDARDY771TXZ\_hamd\_left\_dlpfc

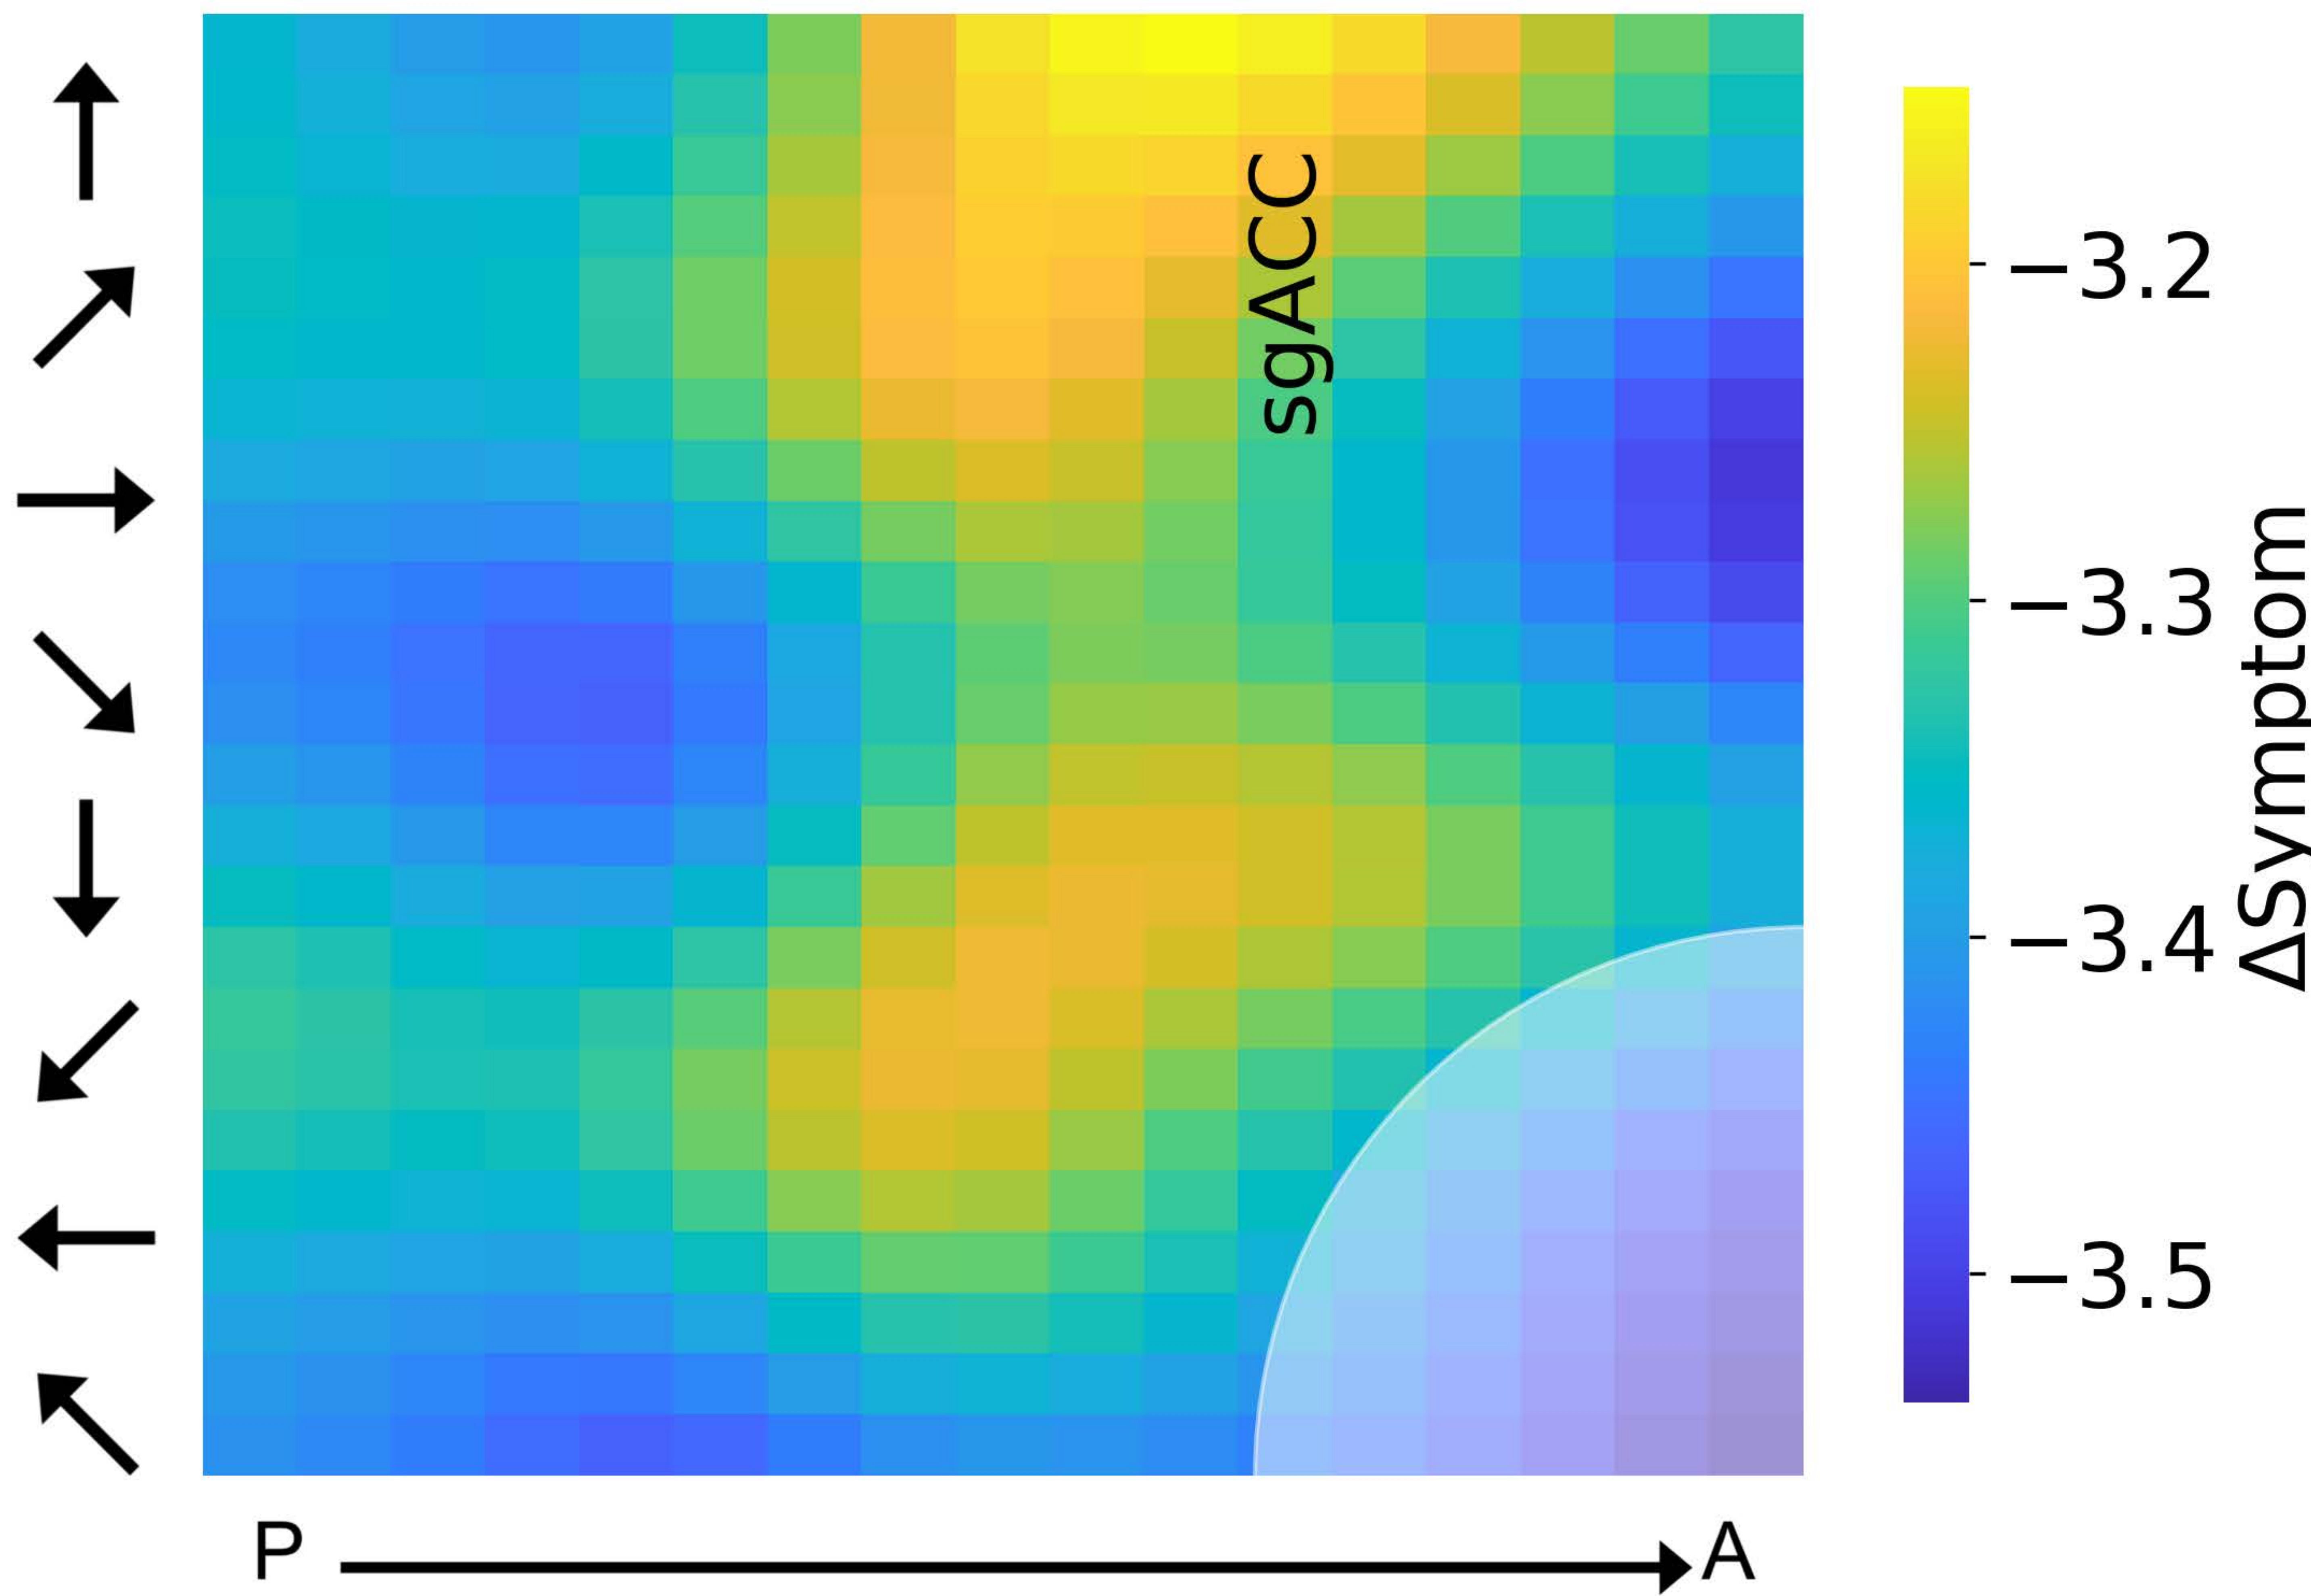



# NDAREU790BVQ\_hamd\_left\_dlpfc

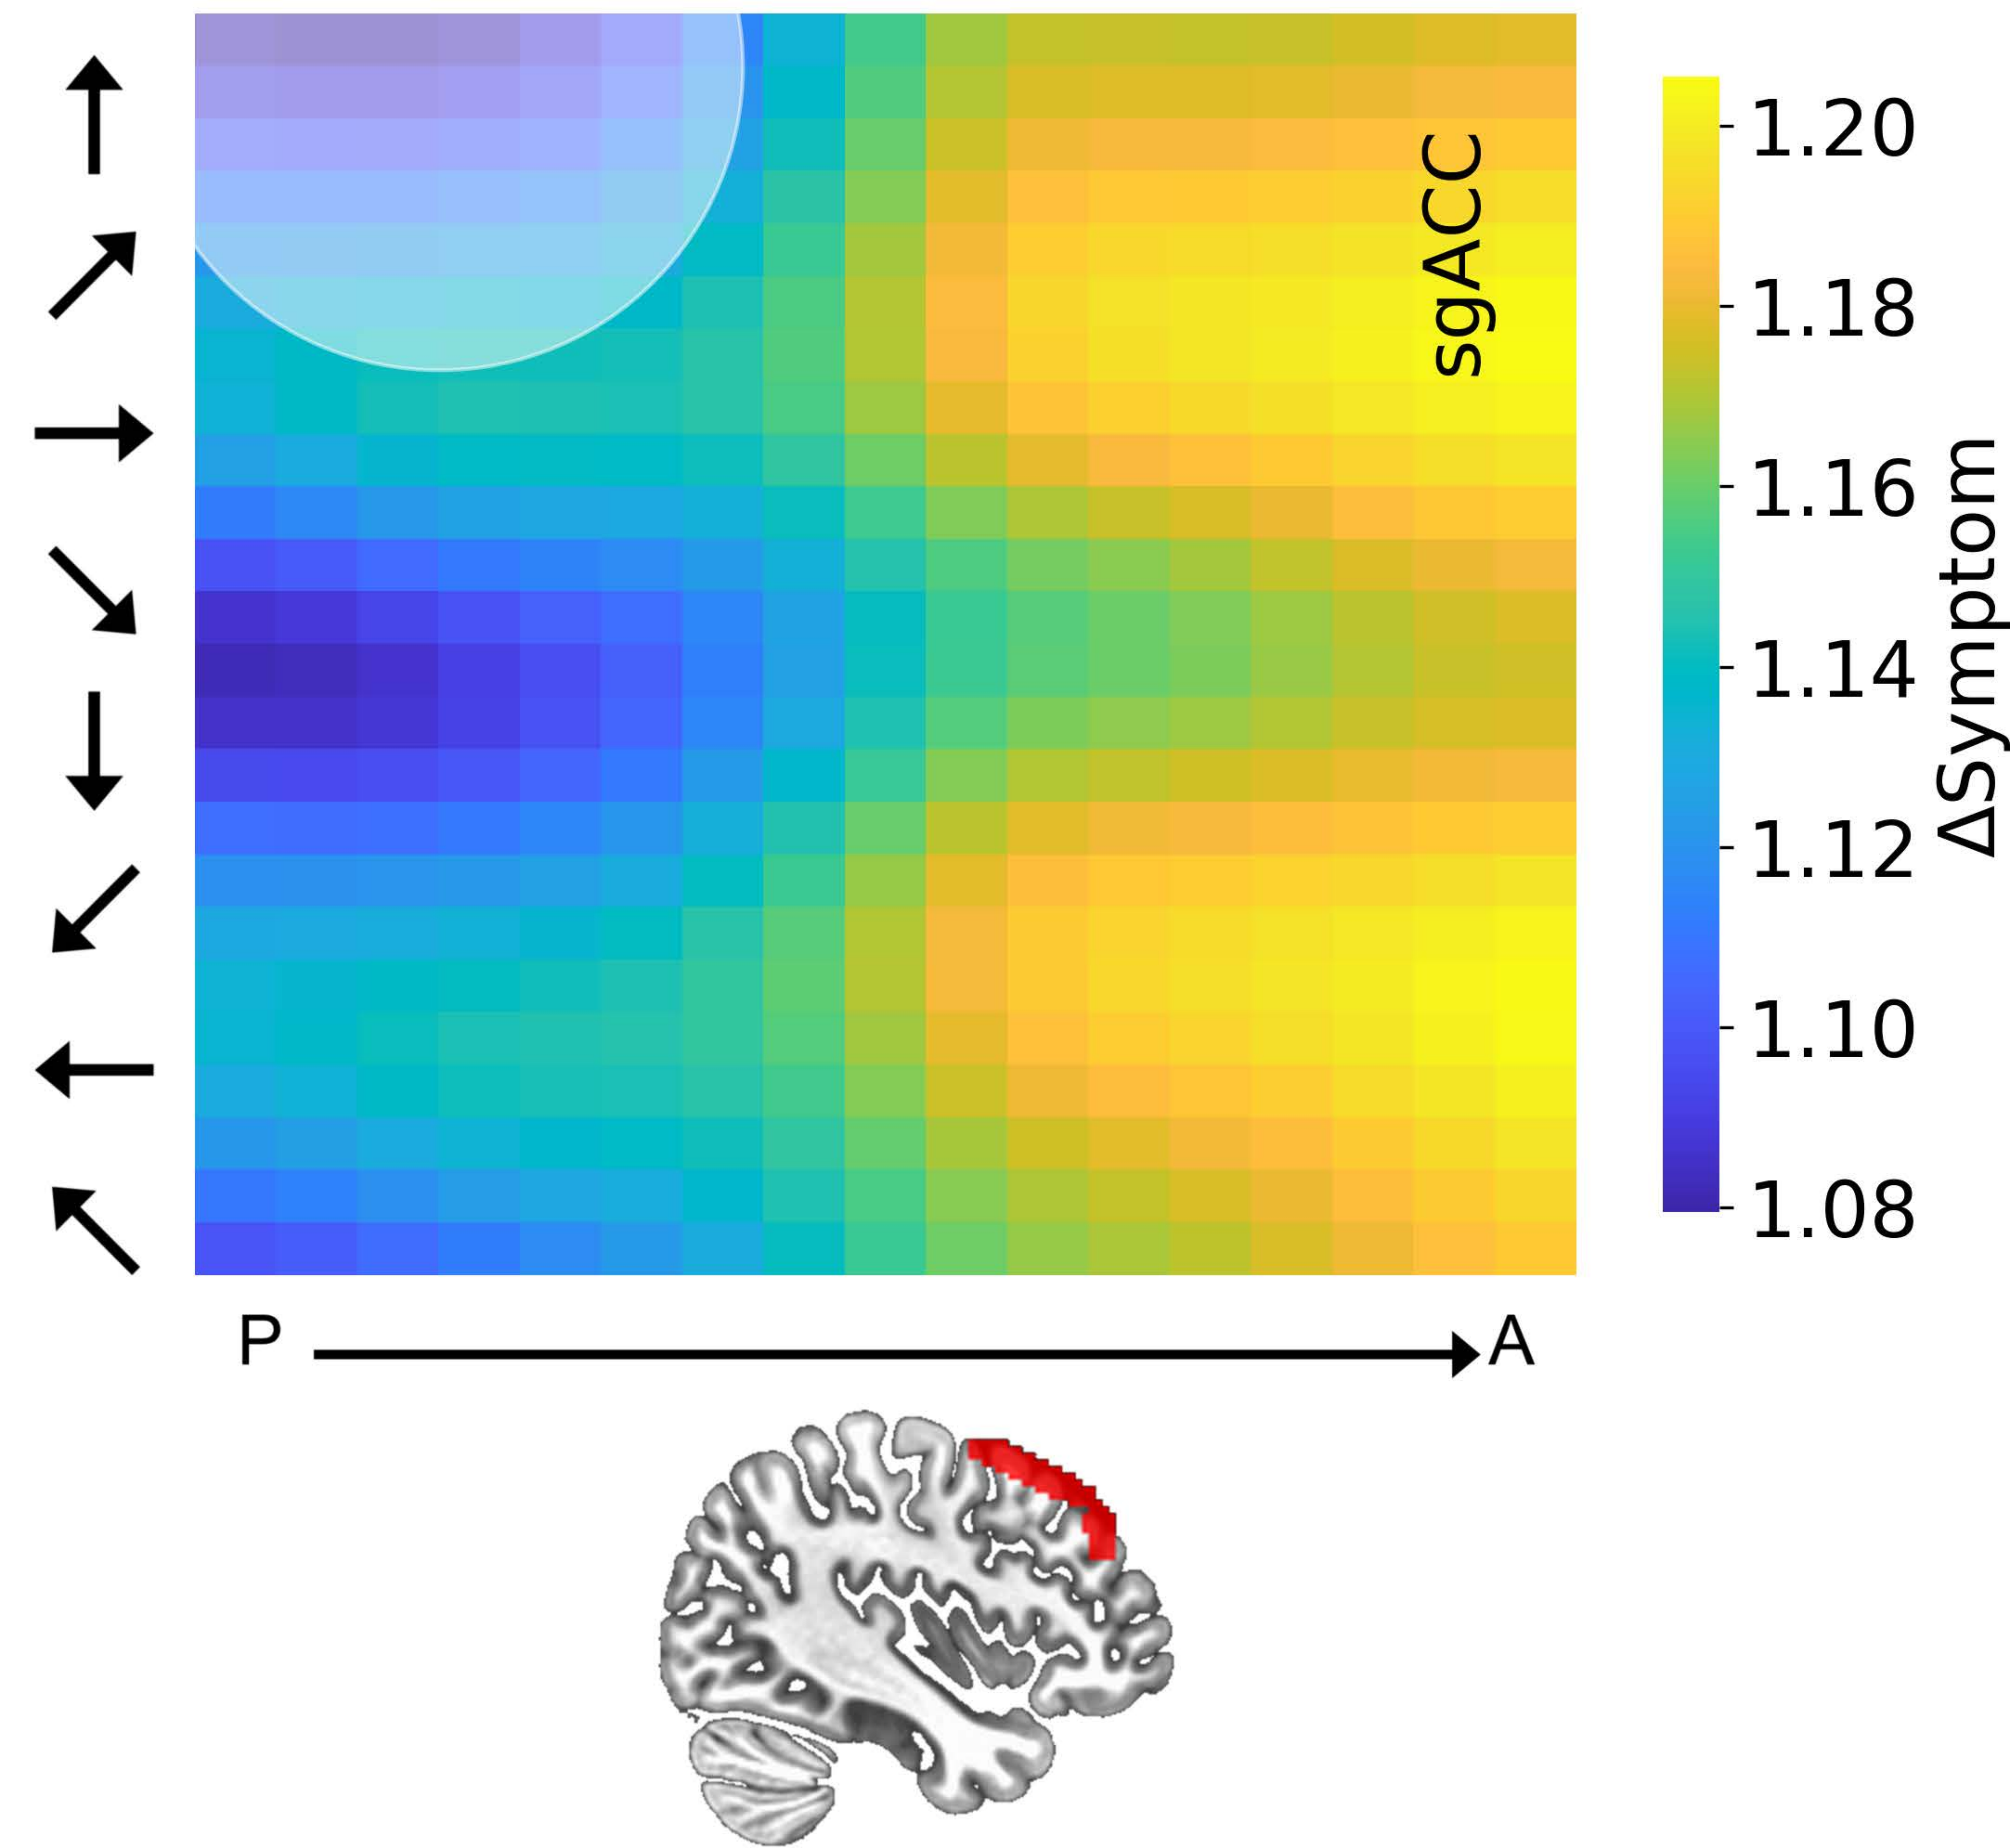



# NDARGA844BF5\_hamd\_left\_dlpfc

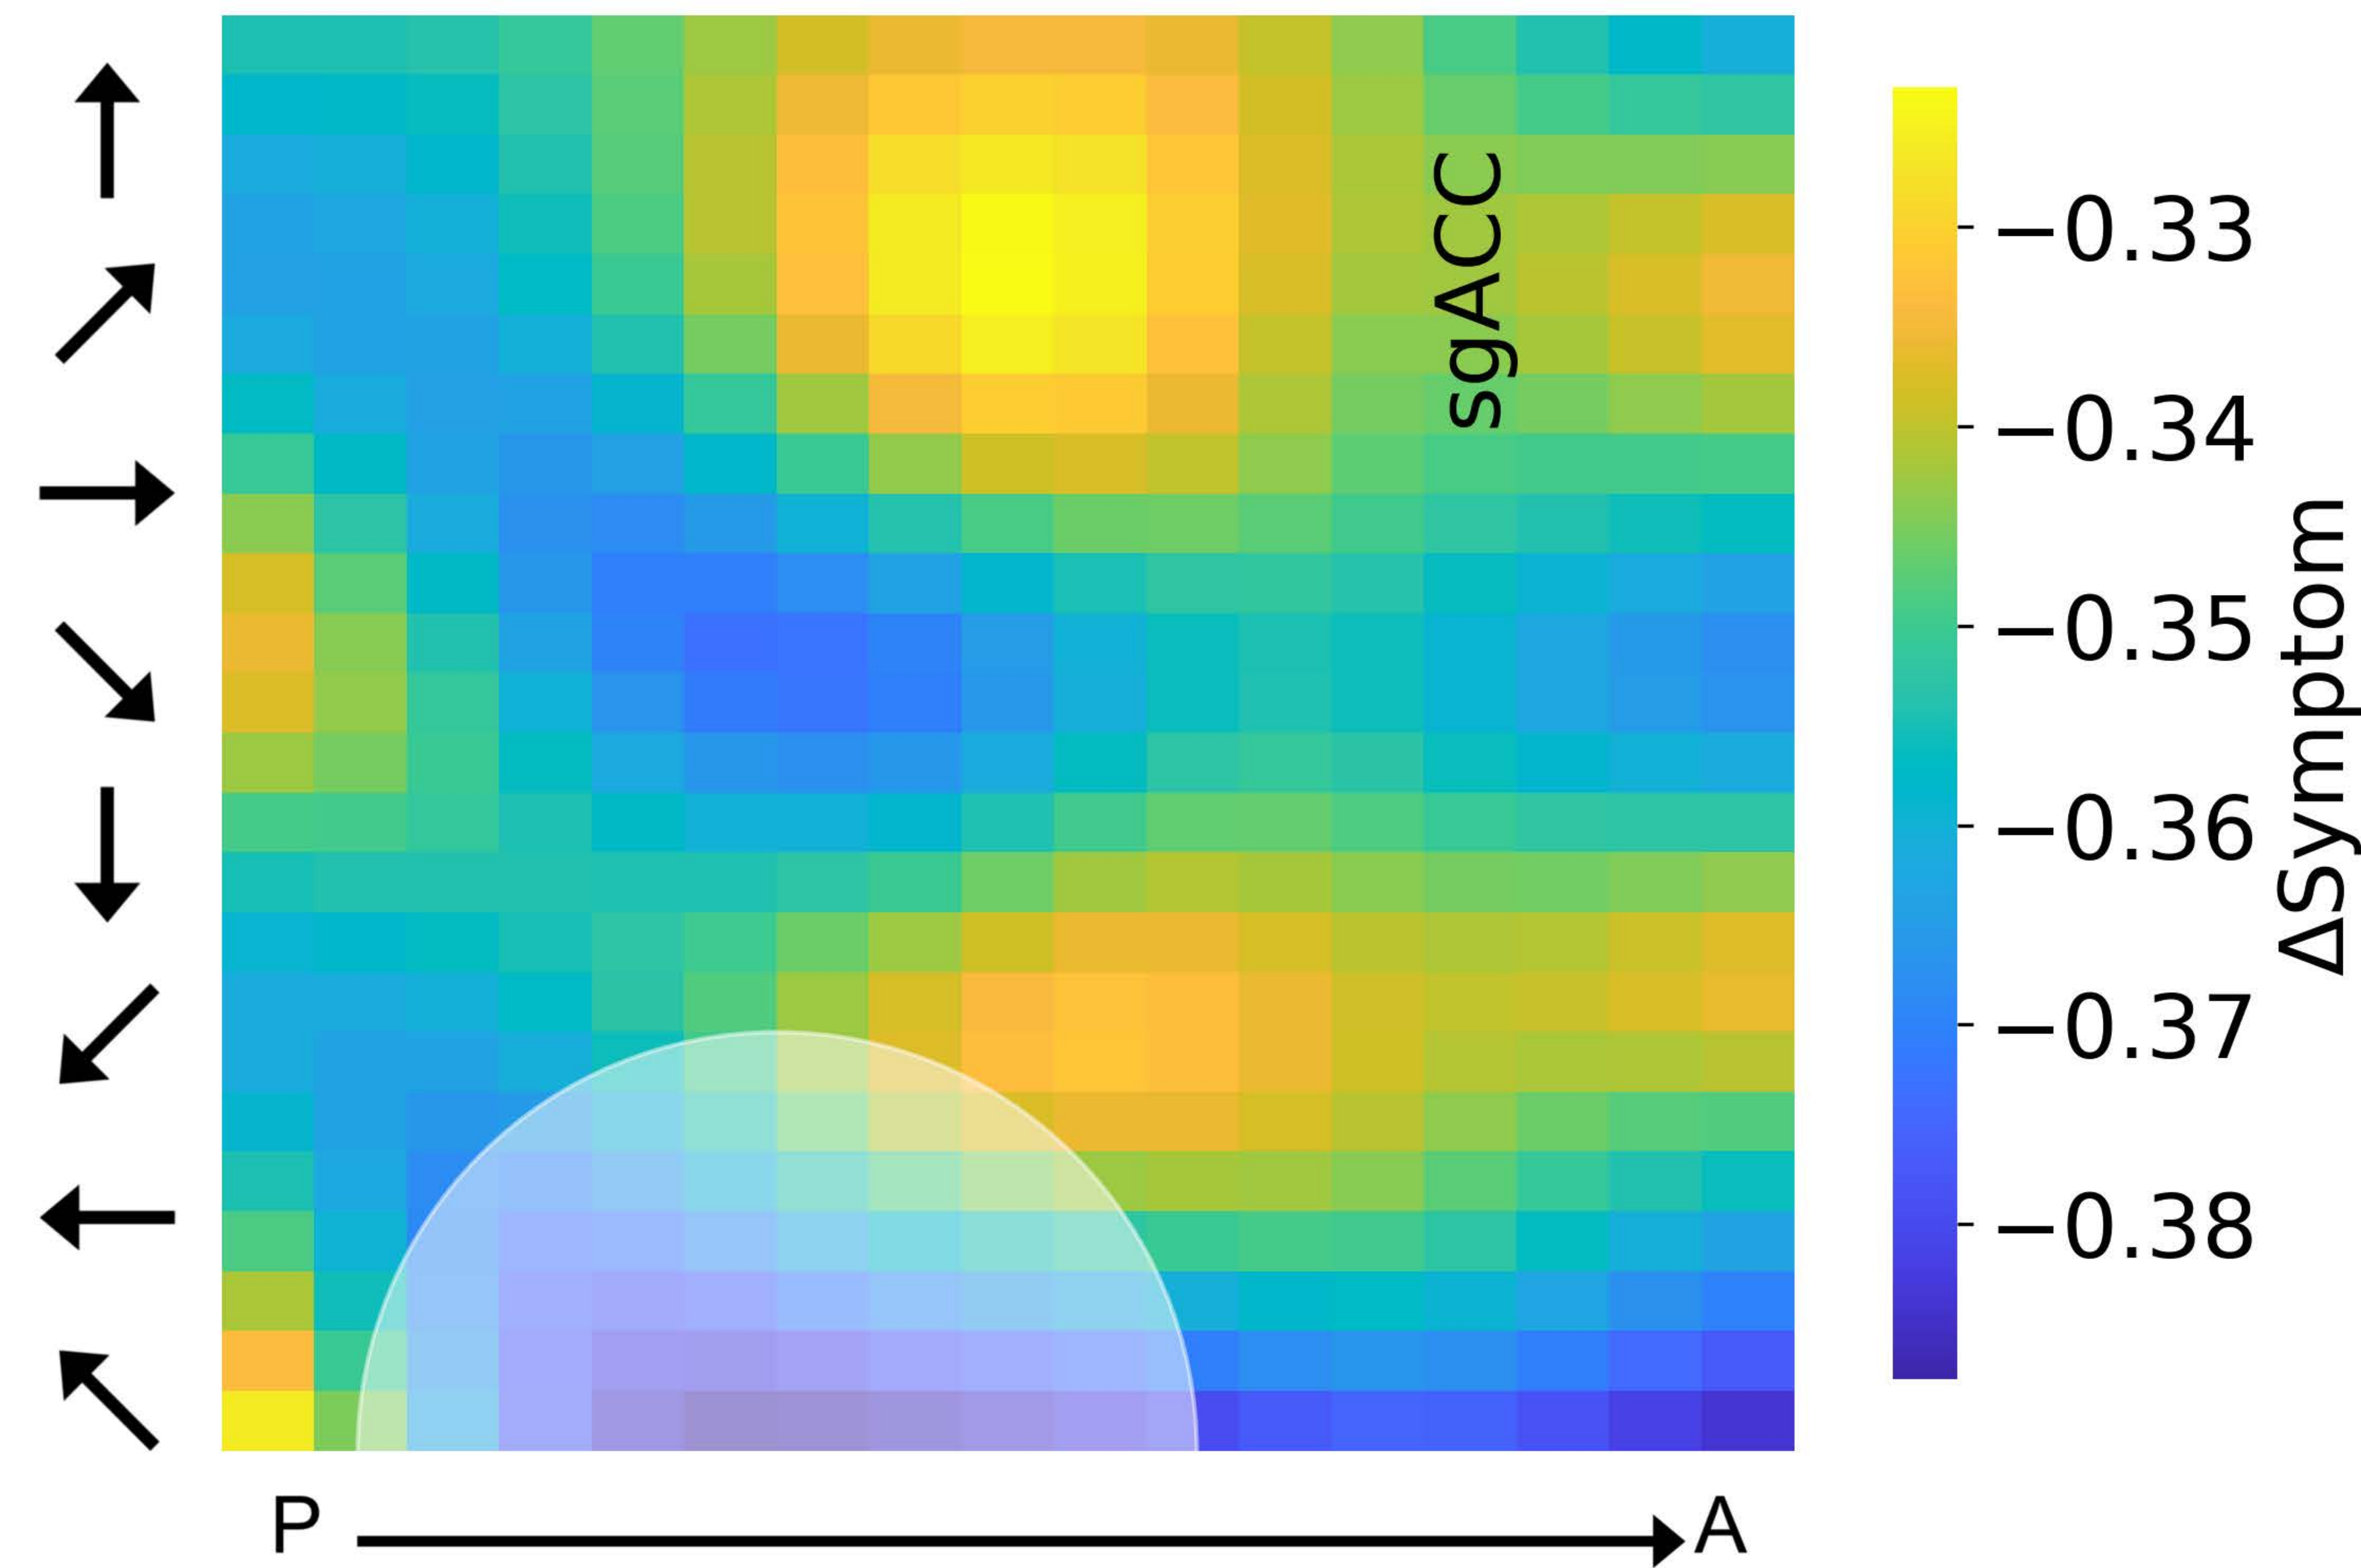



# NDARGN596ENP\_hamd\_left\_dlpfc

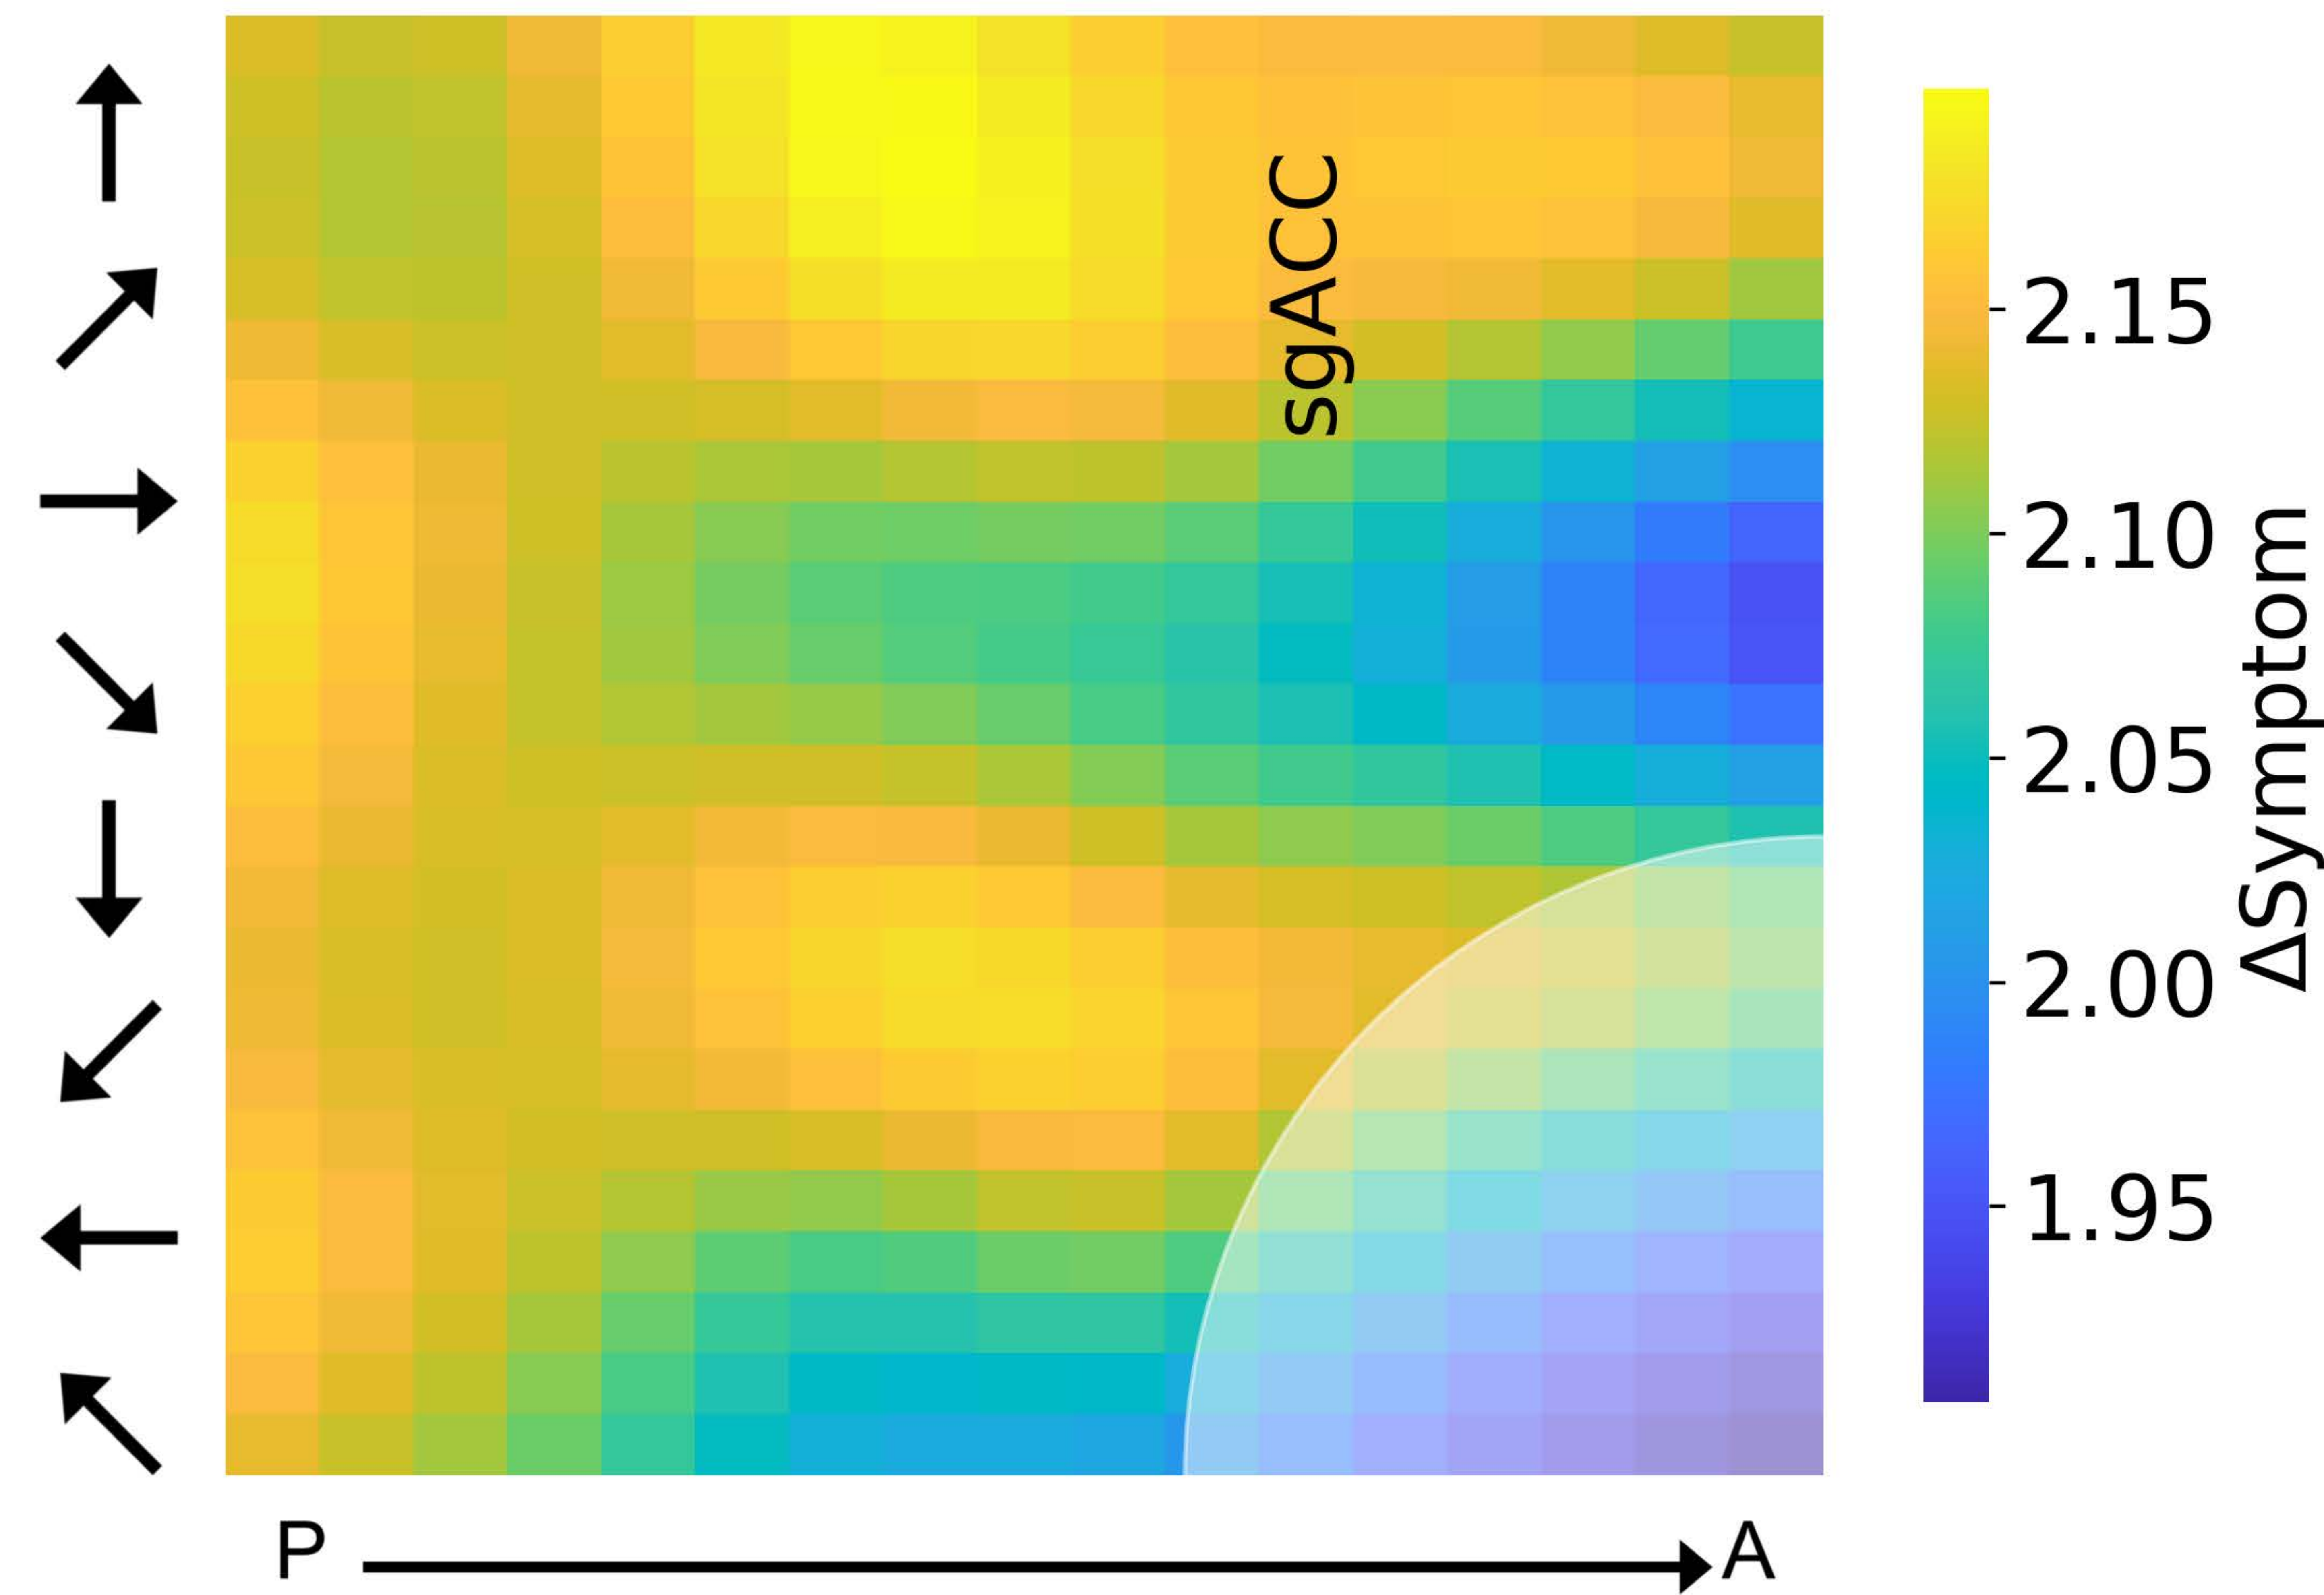



# NDARHU677DFF\_hamd\_left\_dlpfc

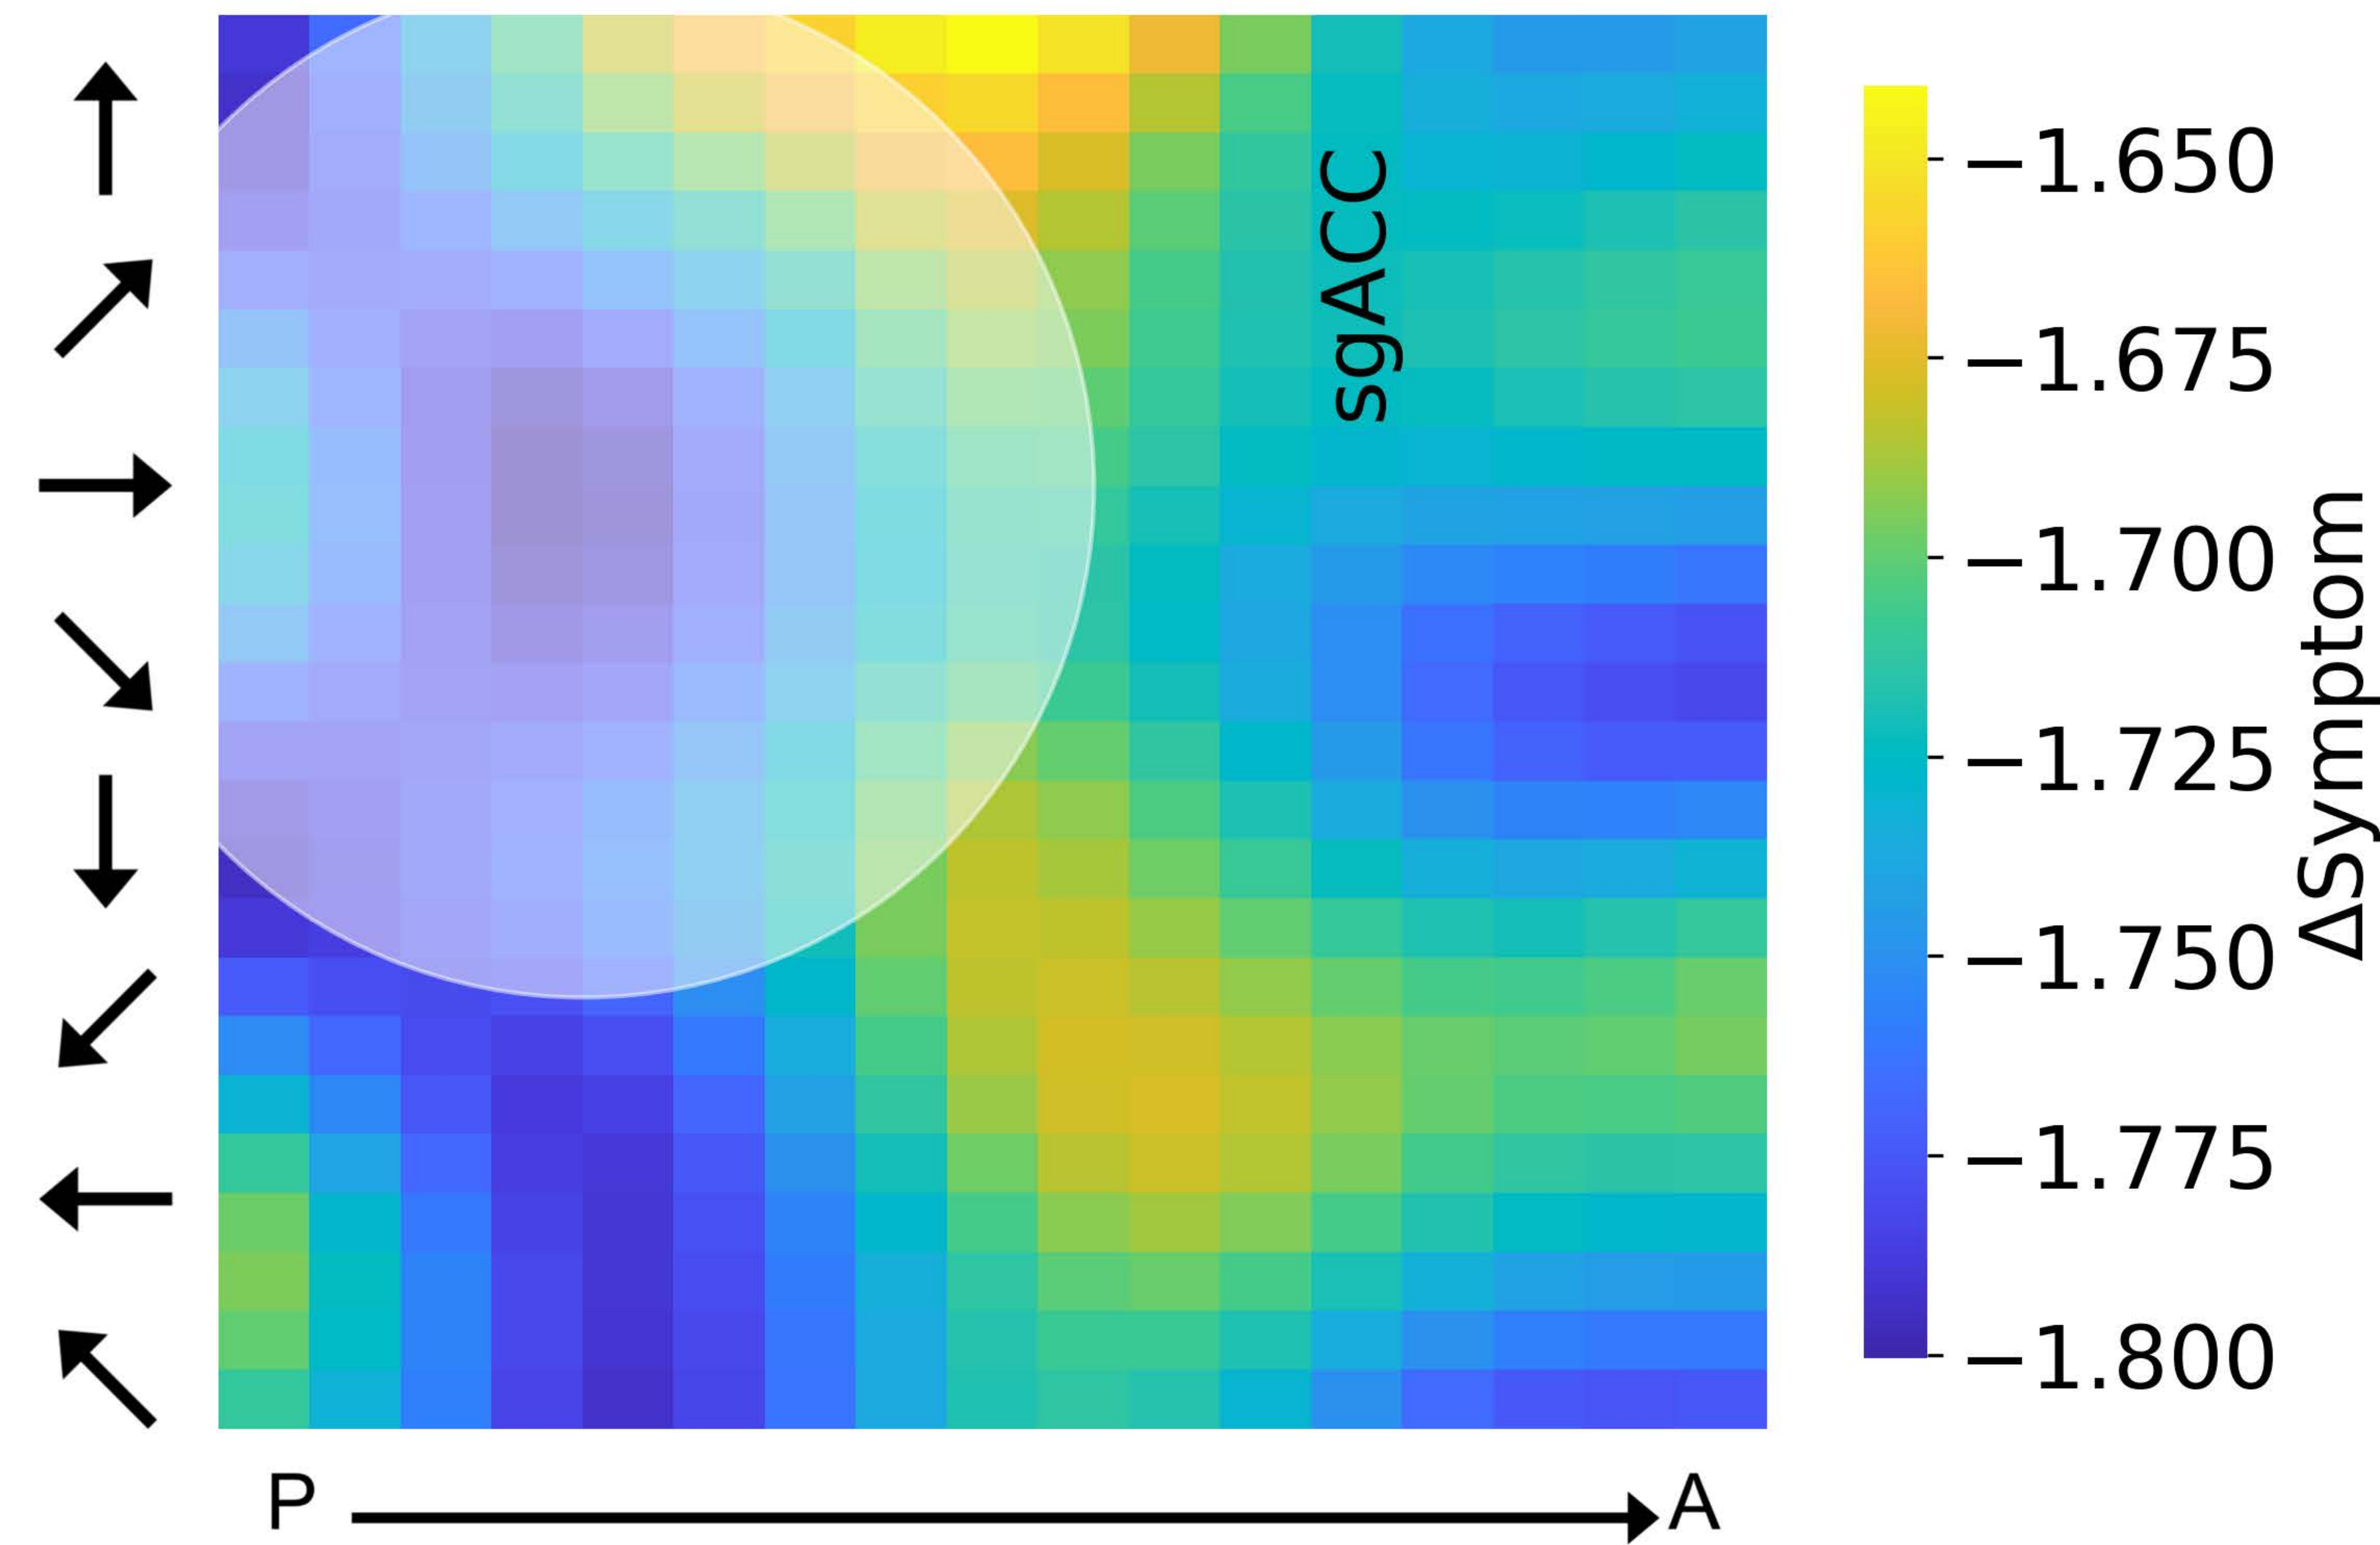



# INDARJL083WMP\_hamd\_left\_dlpfc

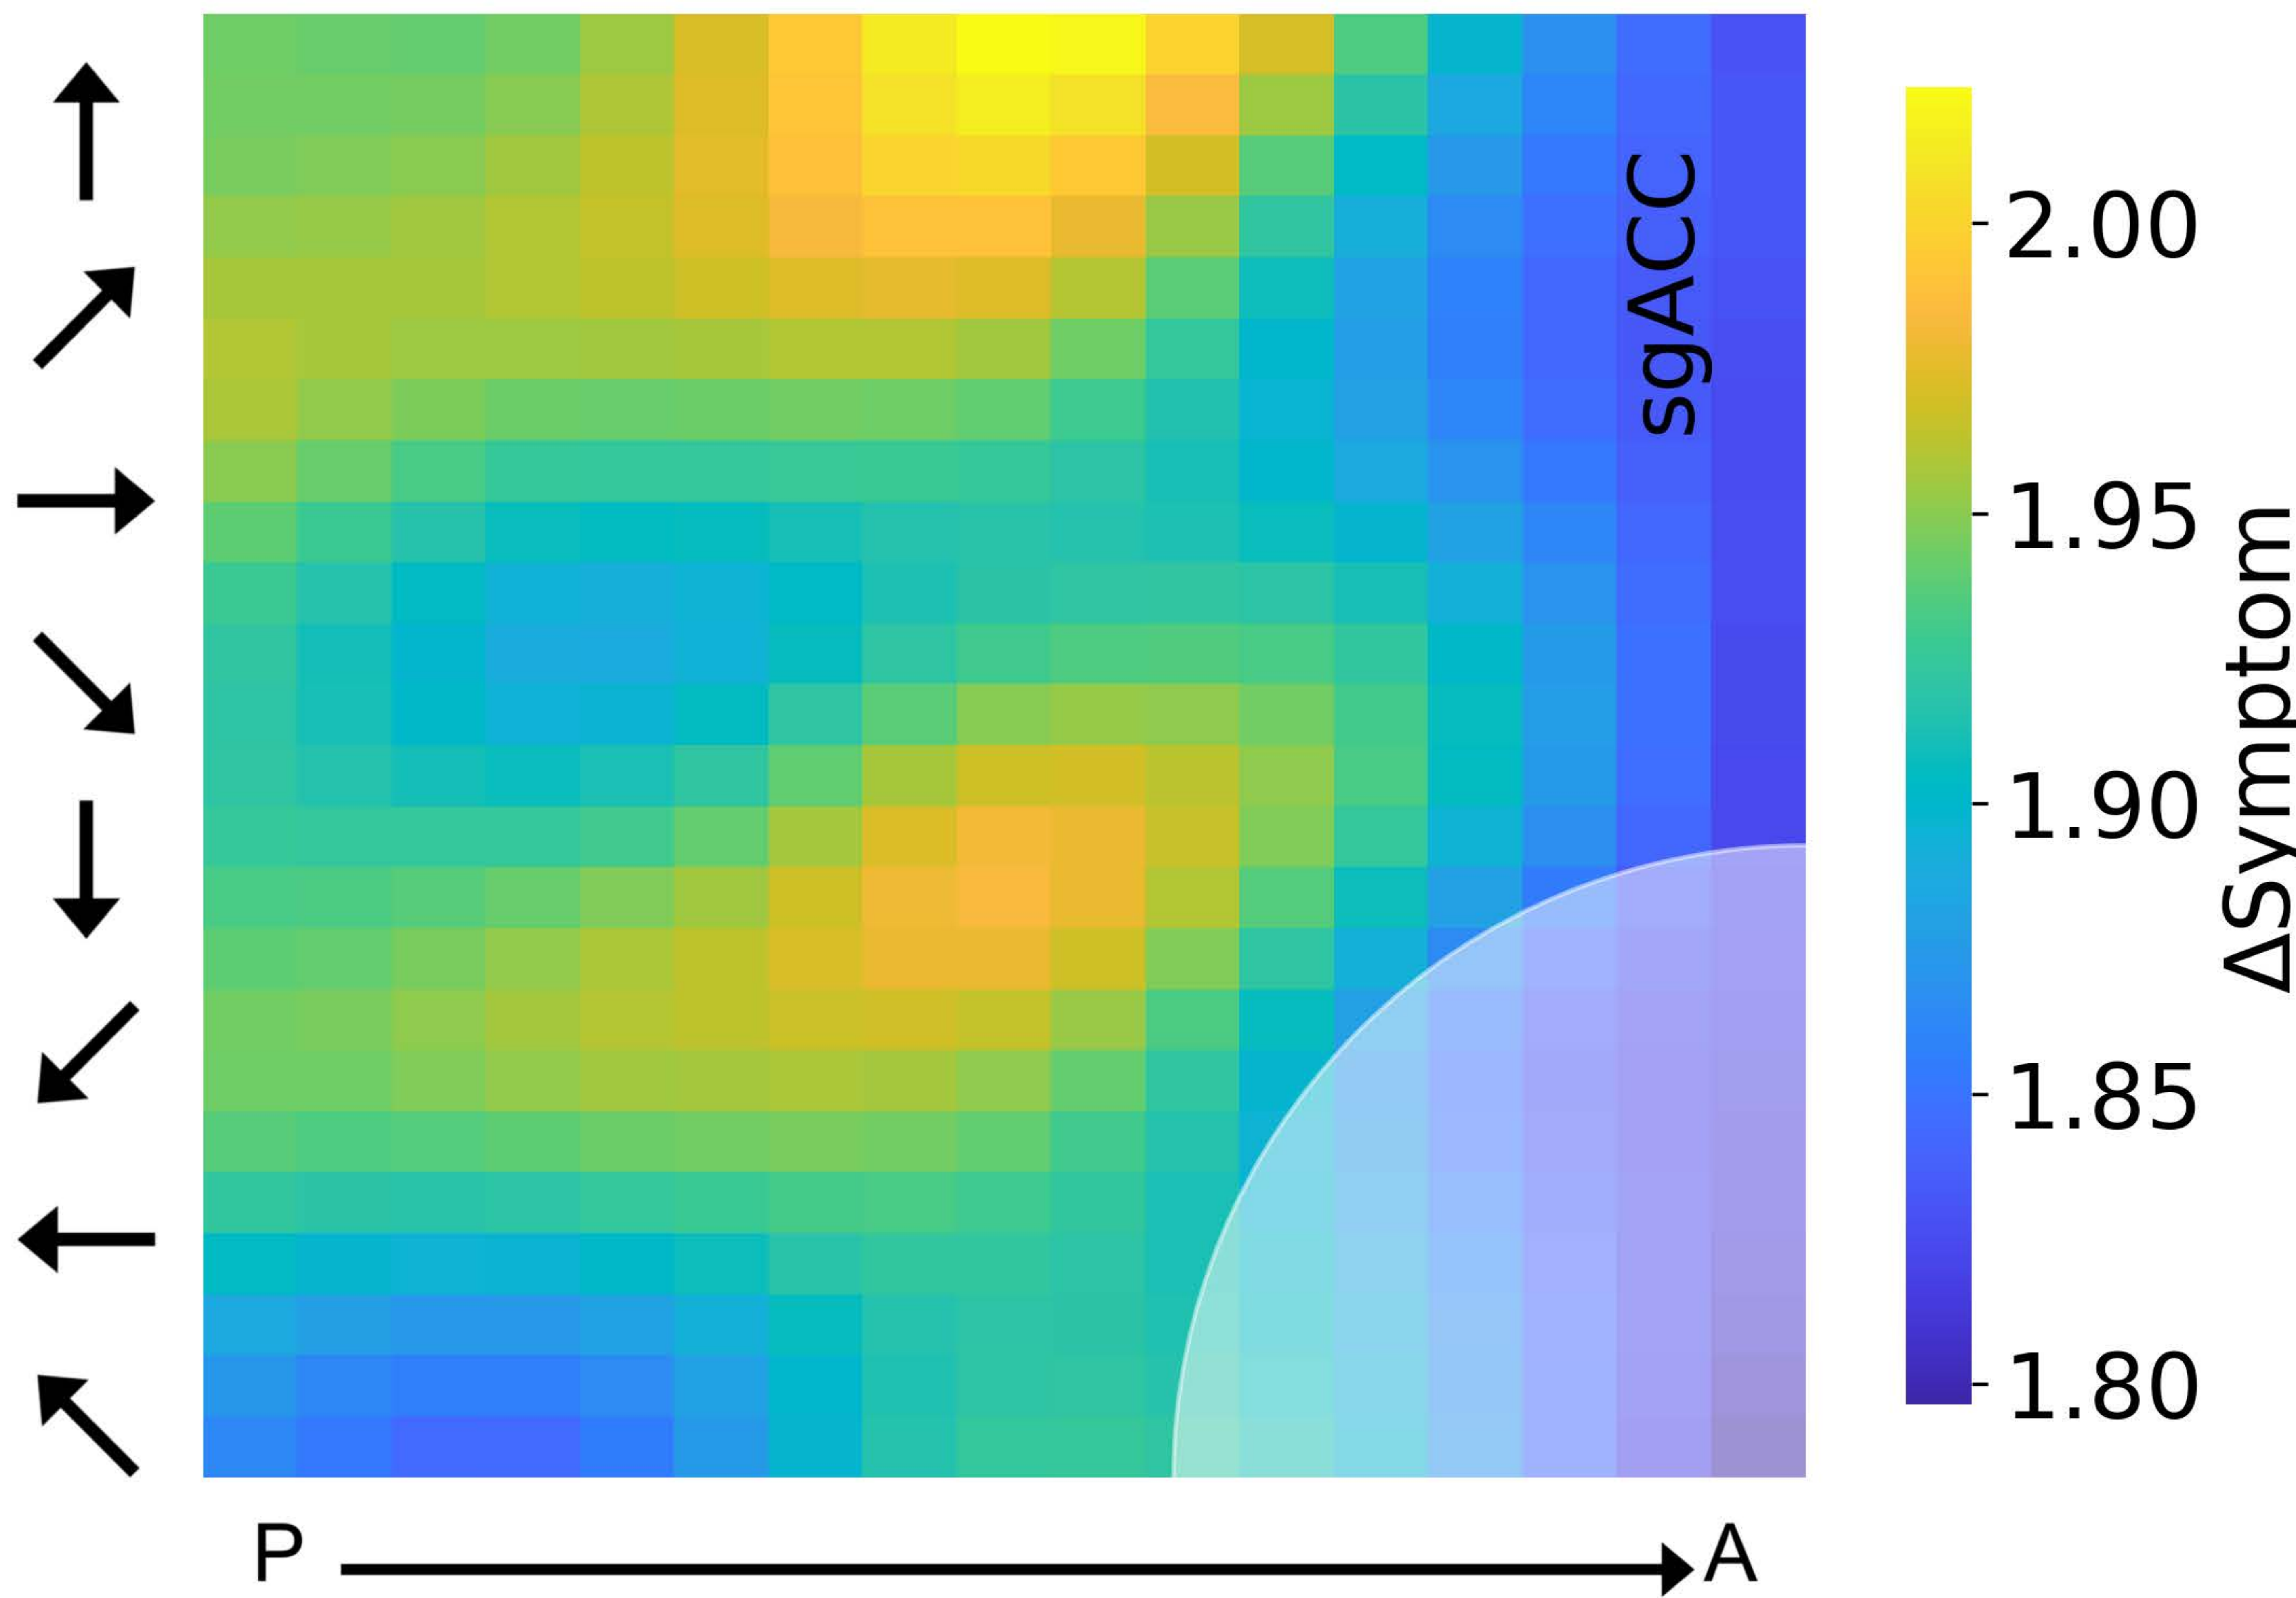



# NDARKR291PWN\_hamd\_left\_dlpfc

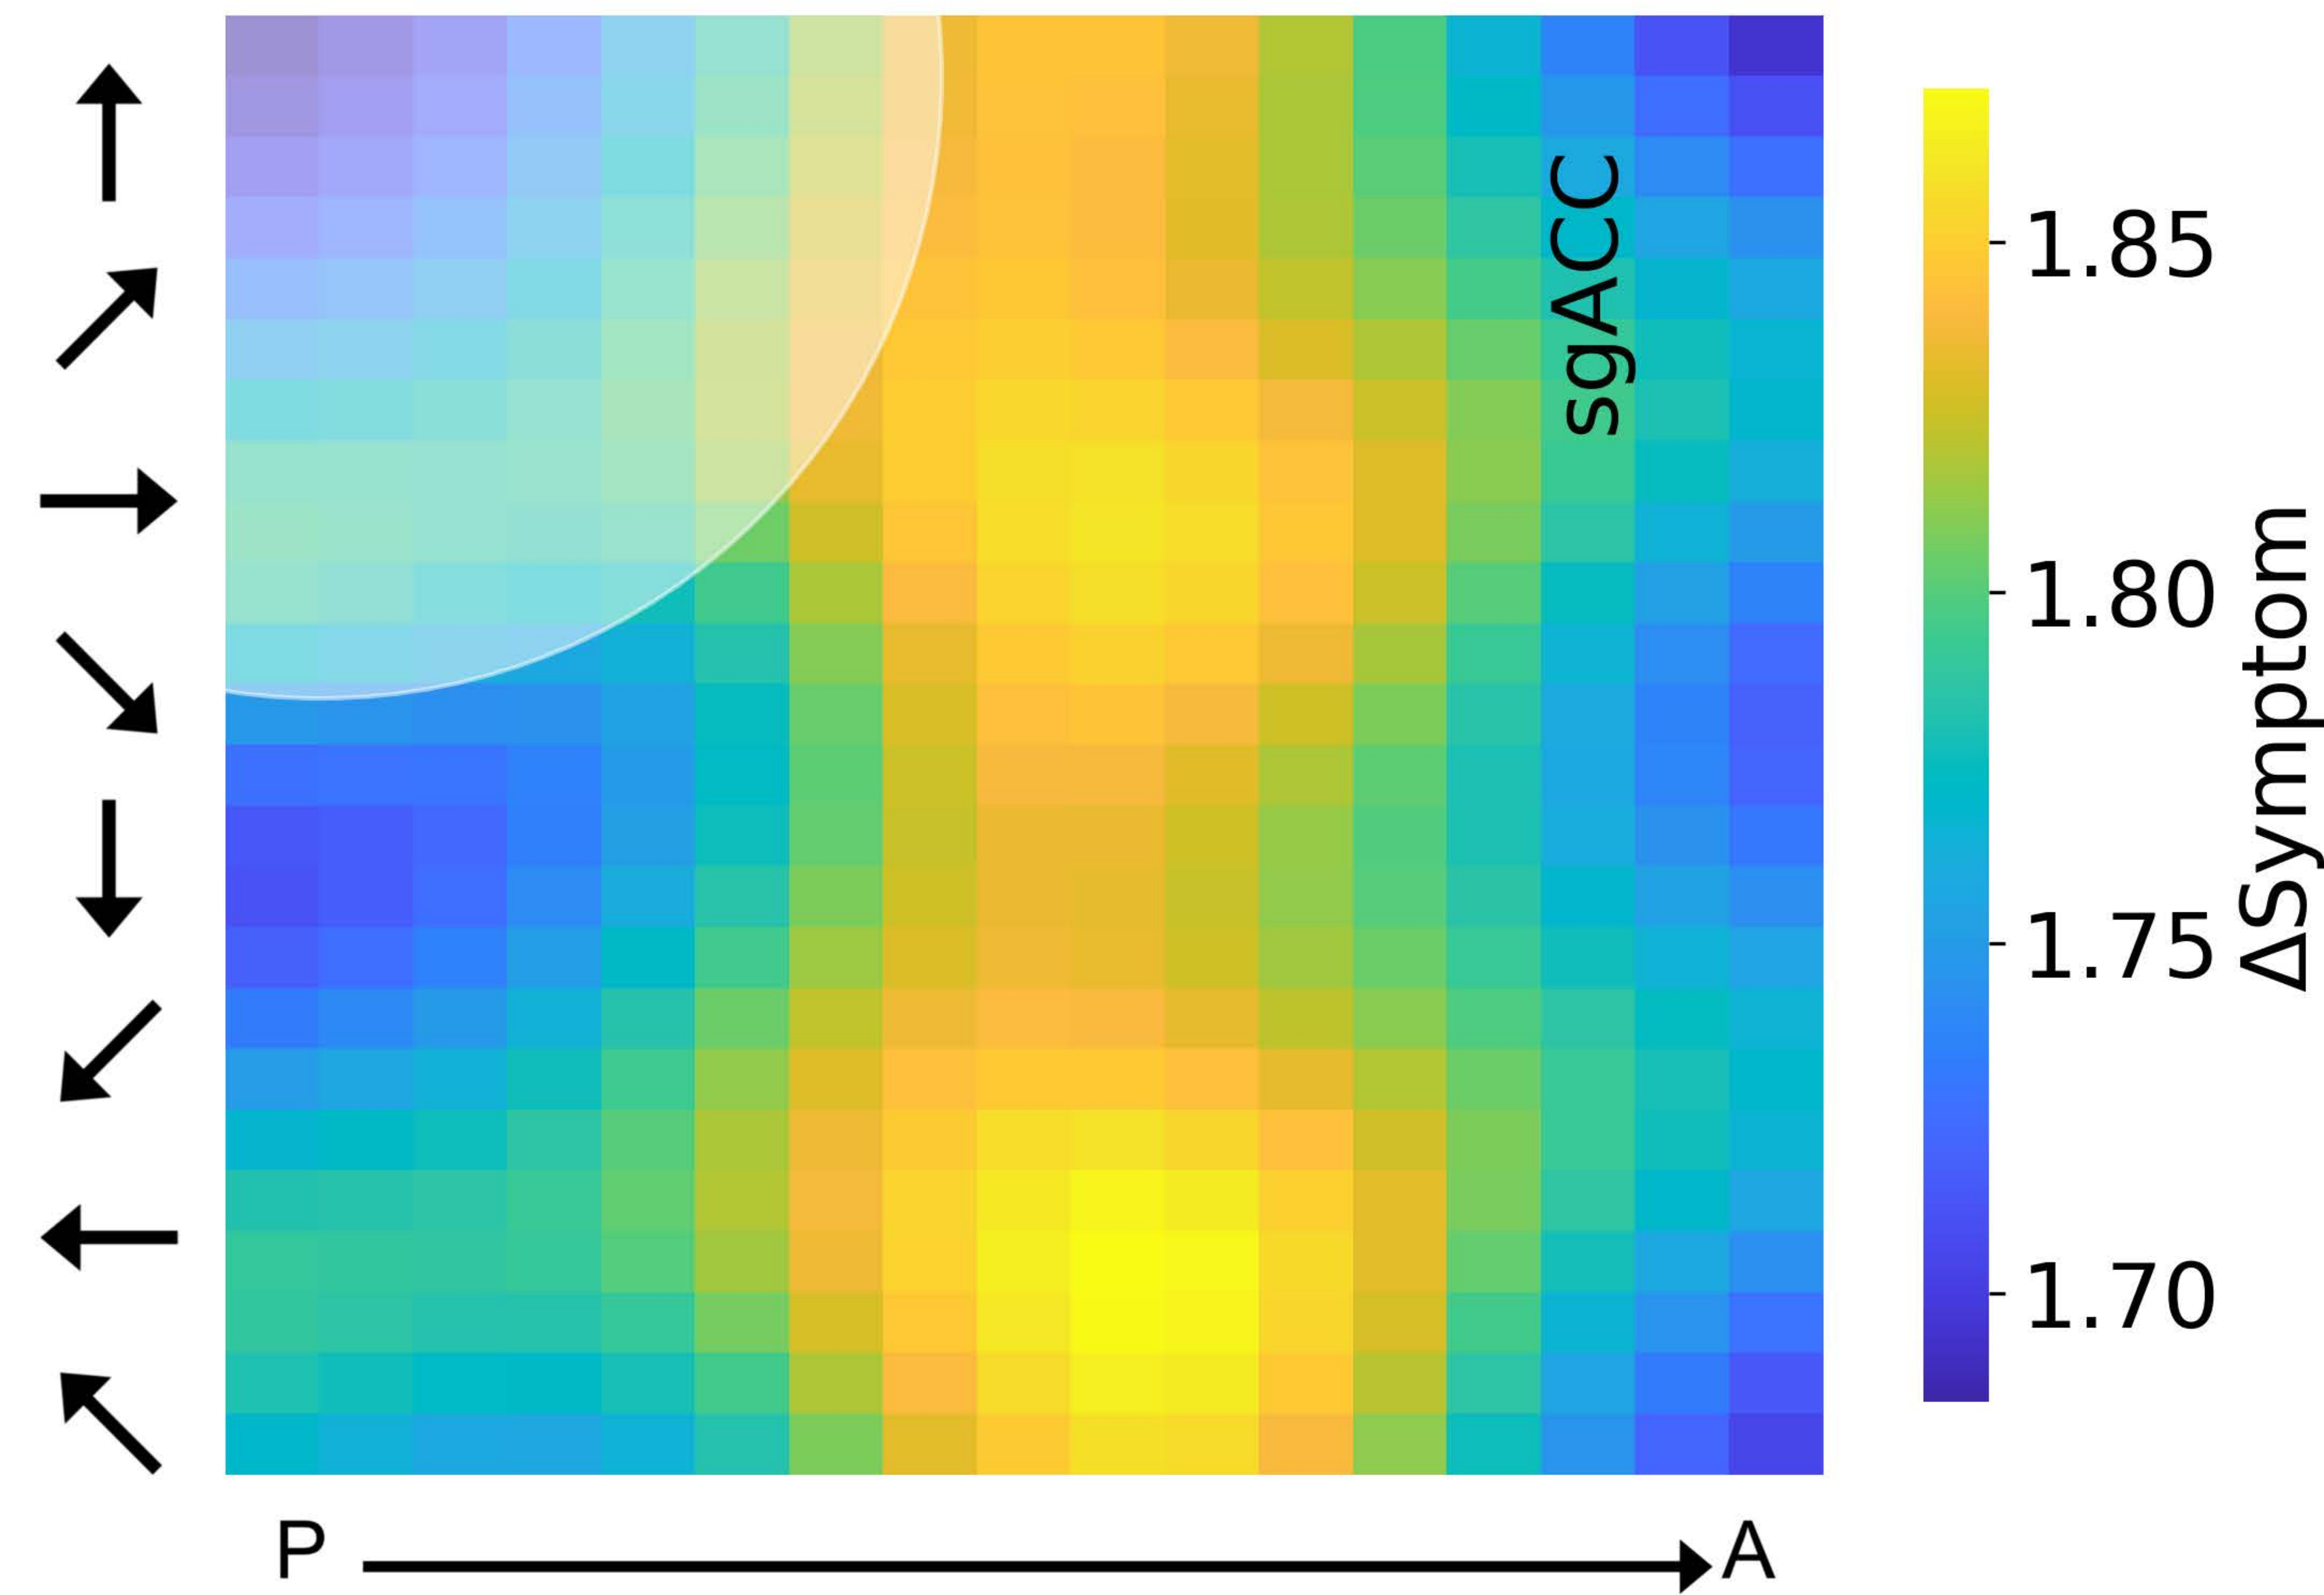



# NDARLH479MBF\_hamd\_left\_dlpfc

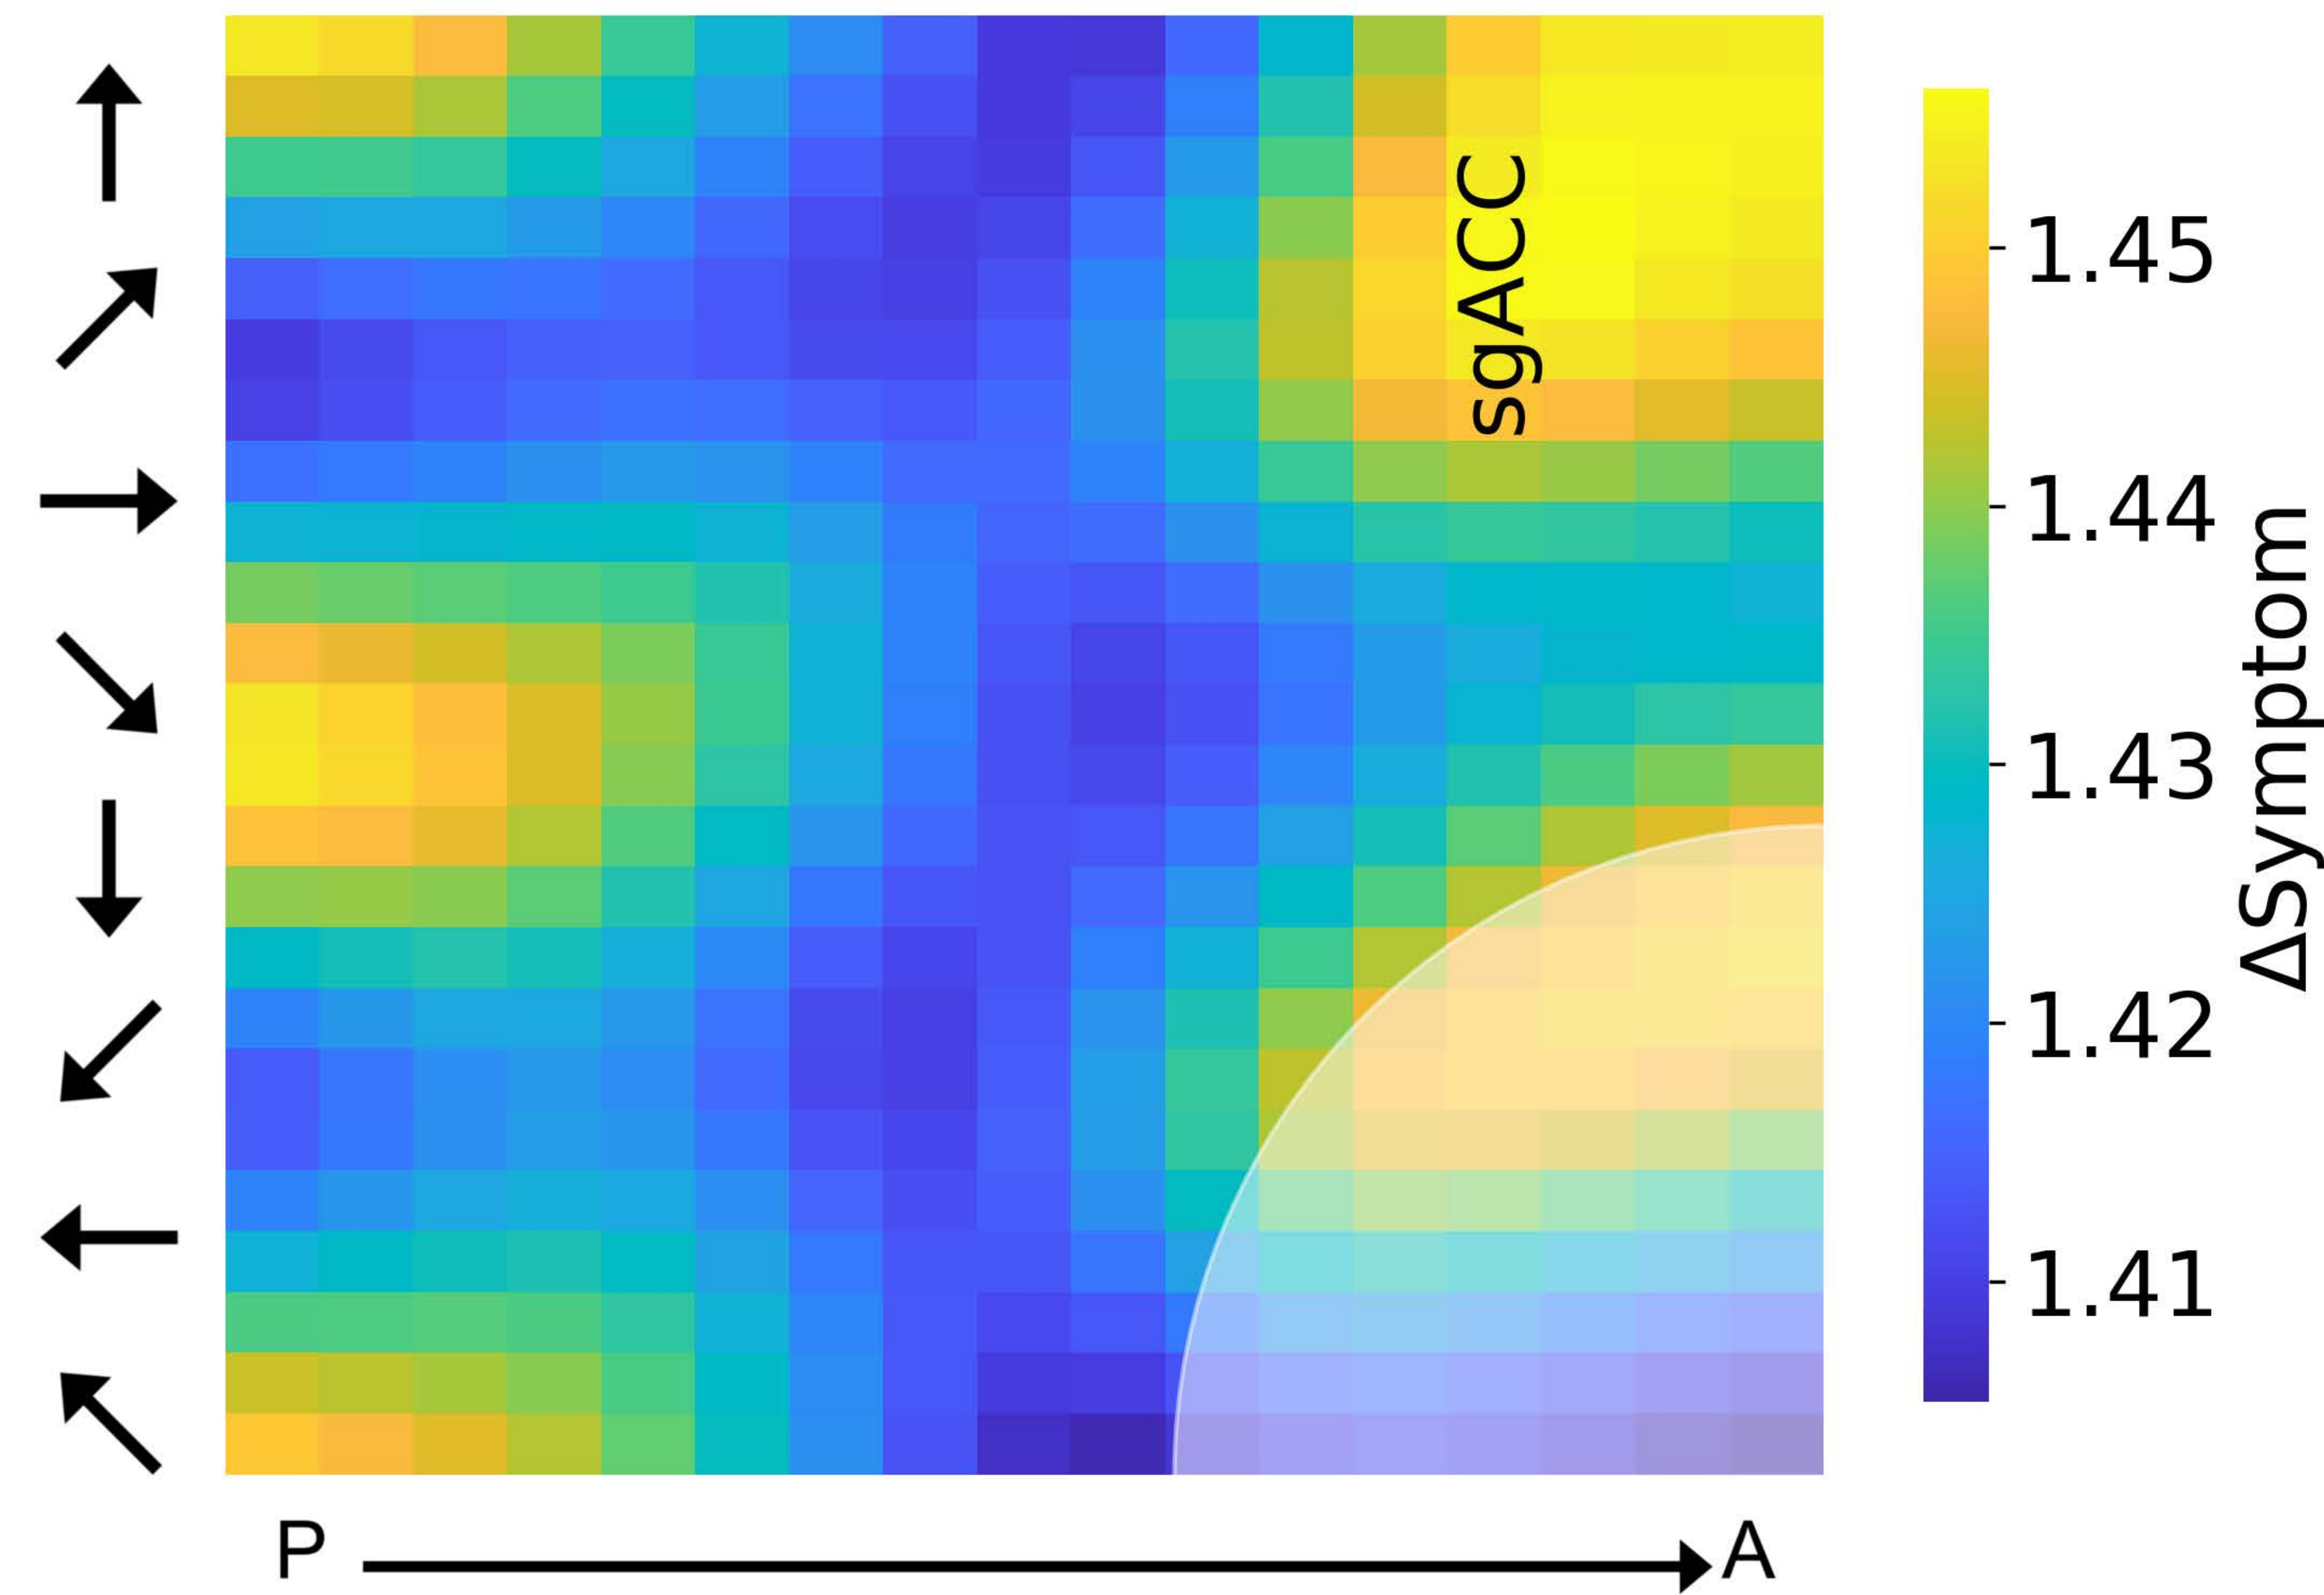



# NDARME497RF8\_hamd\_left\_dlpfc

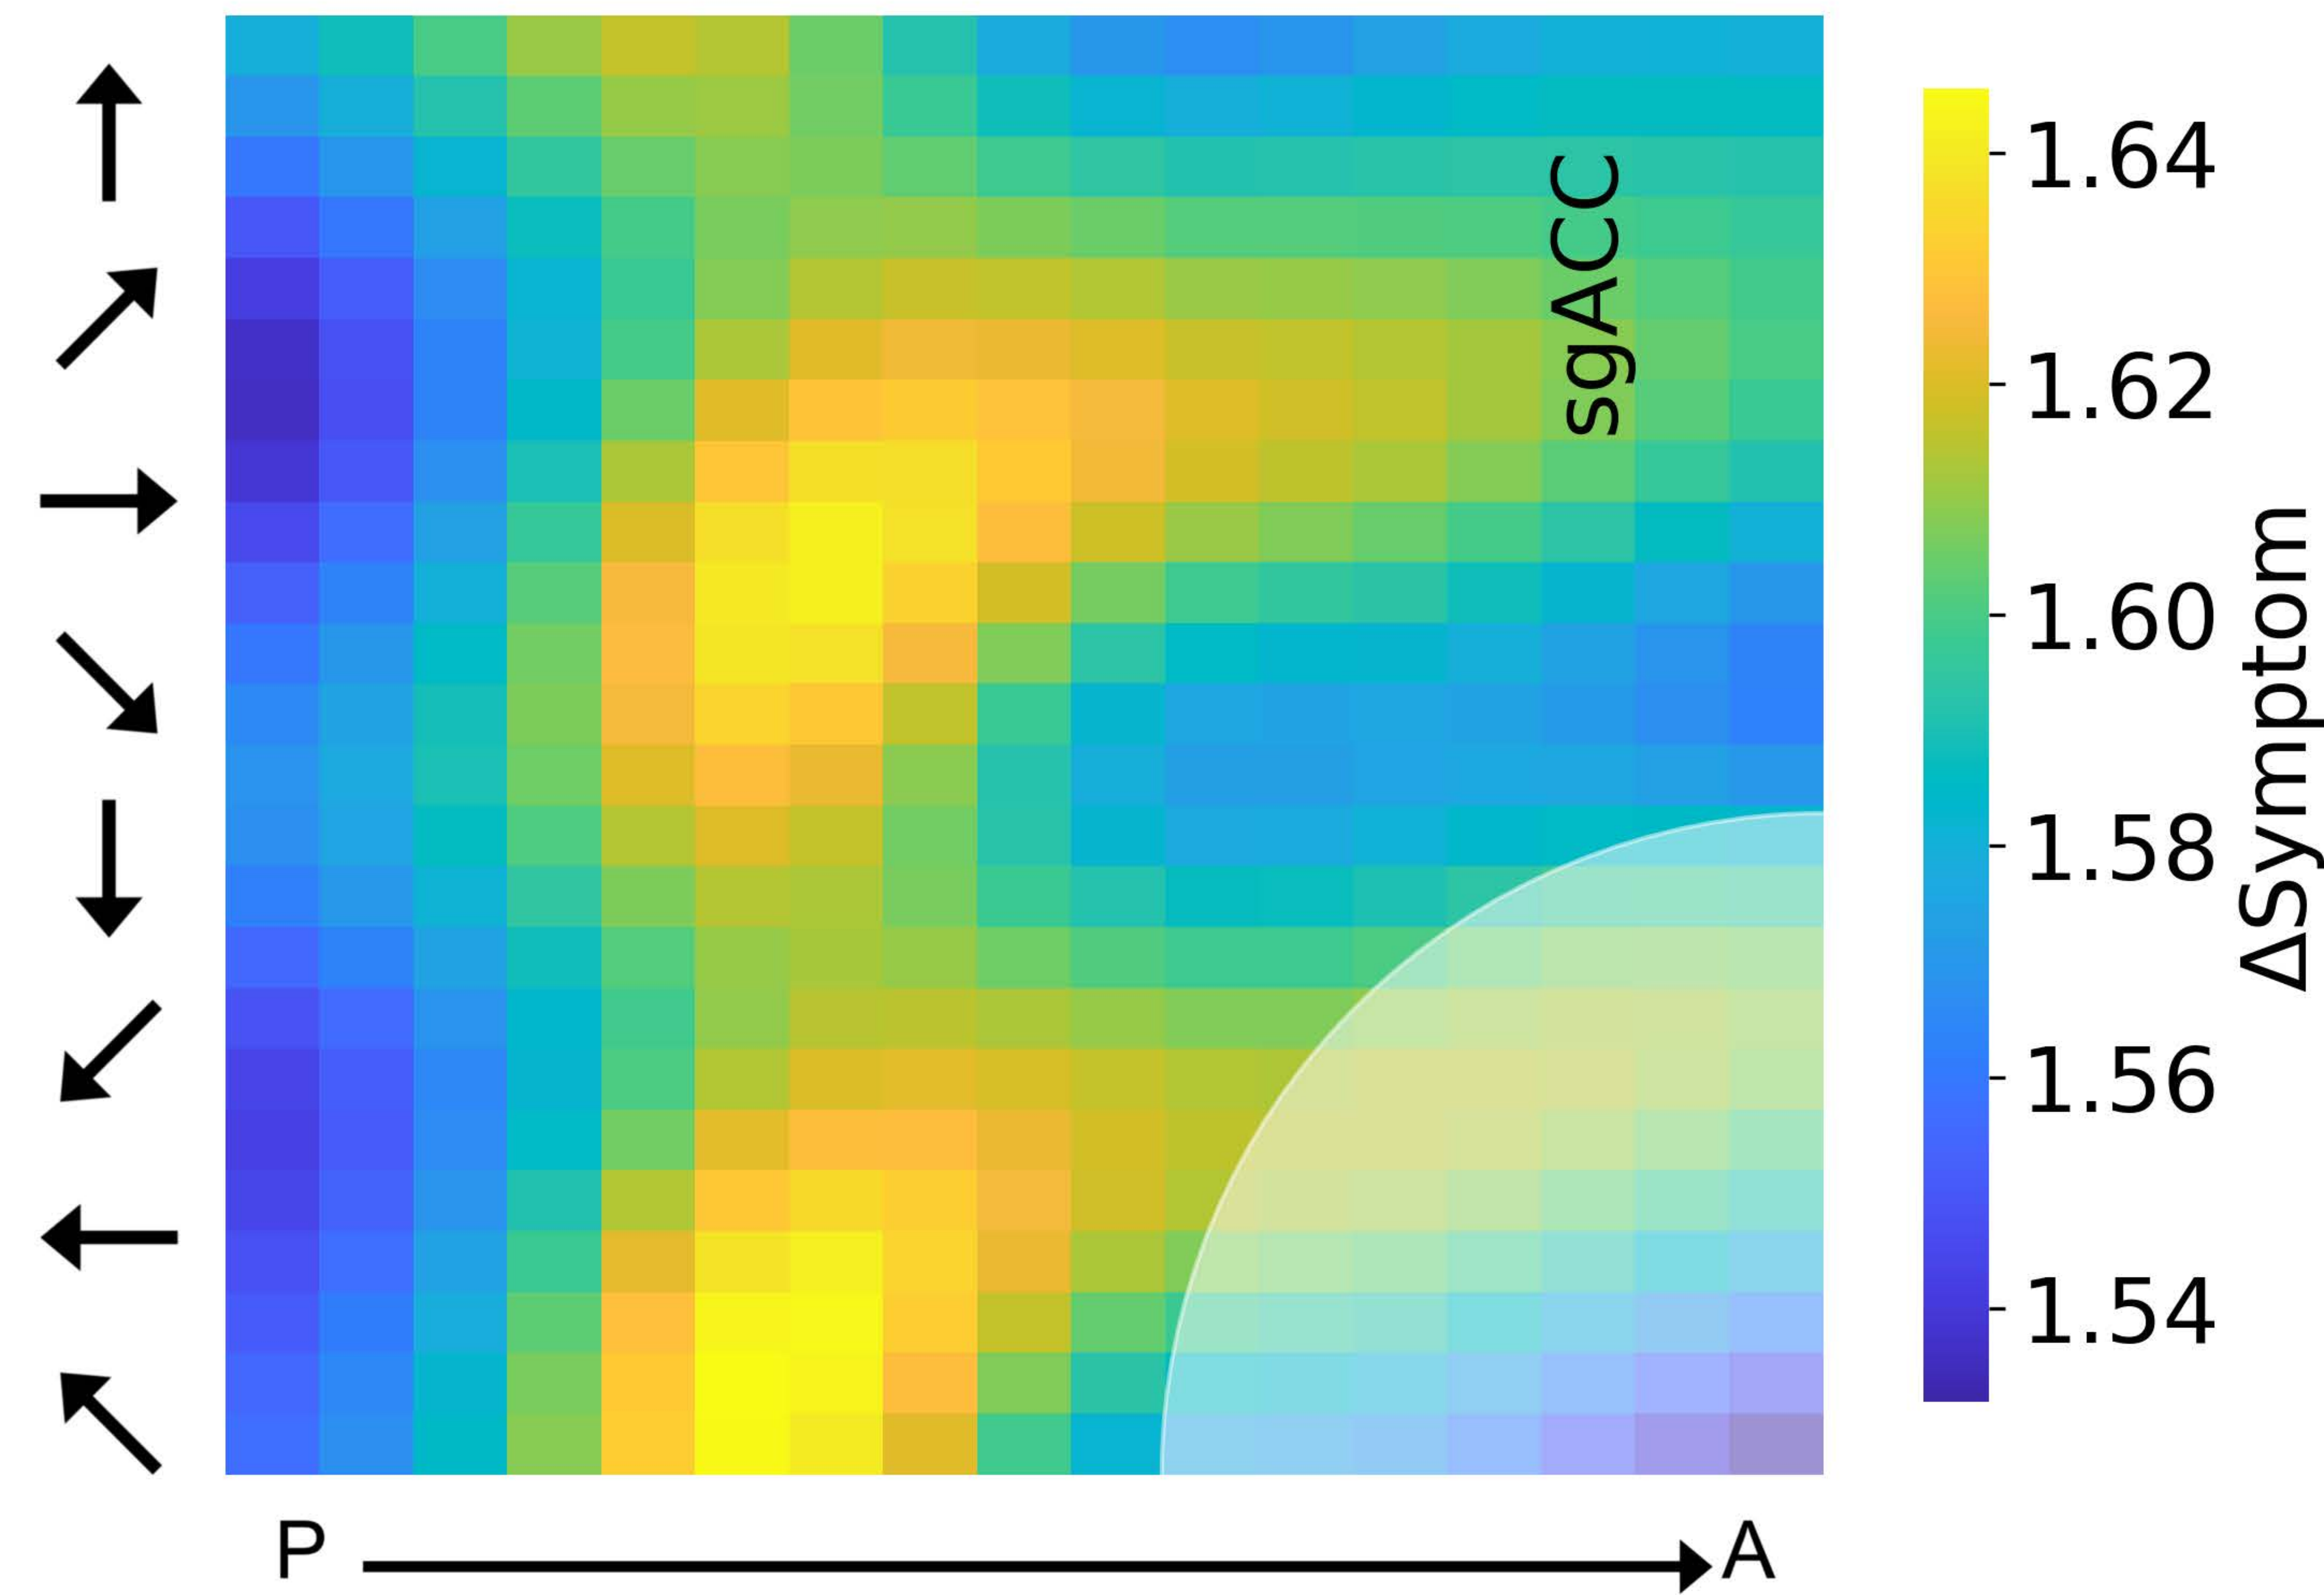



# NDARNJ618KZJ\_hamd\_left\_dlpfc

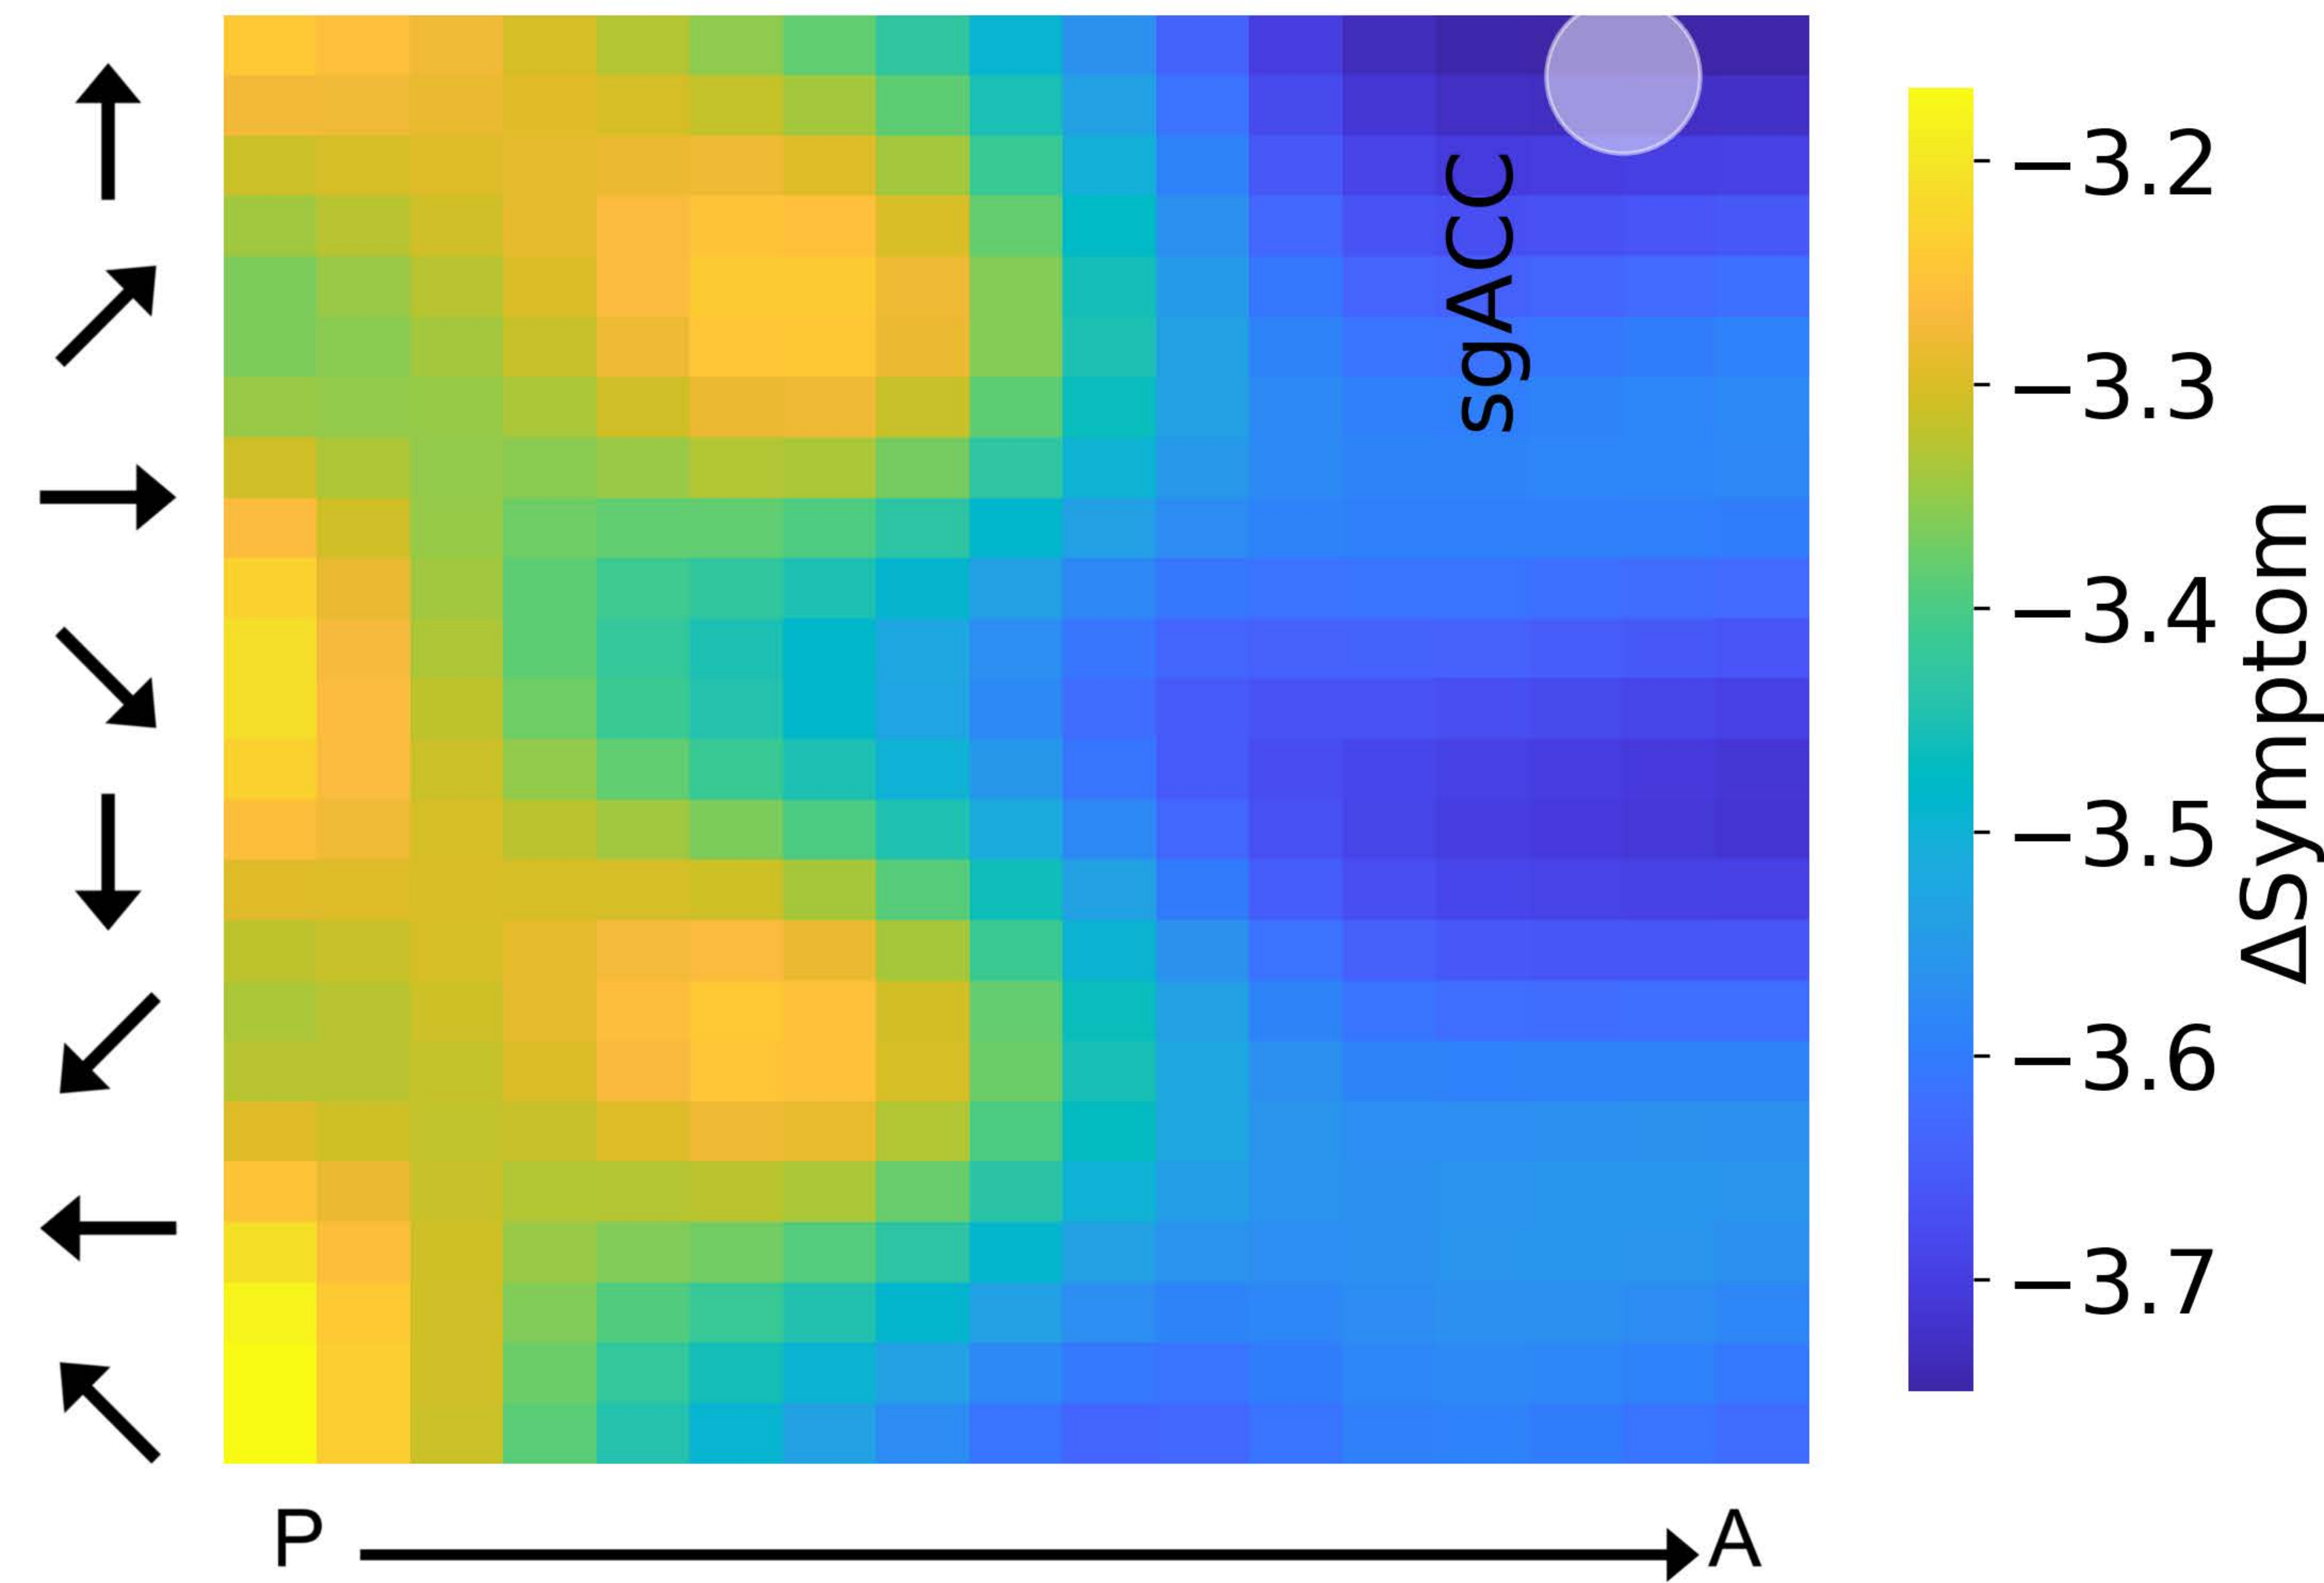



# INDARNL715RTY\_hamd\_left\_dlpfc

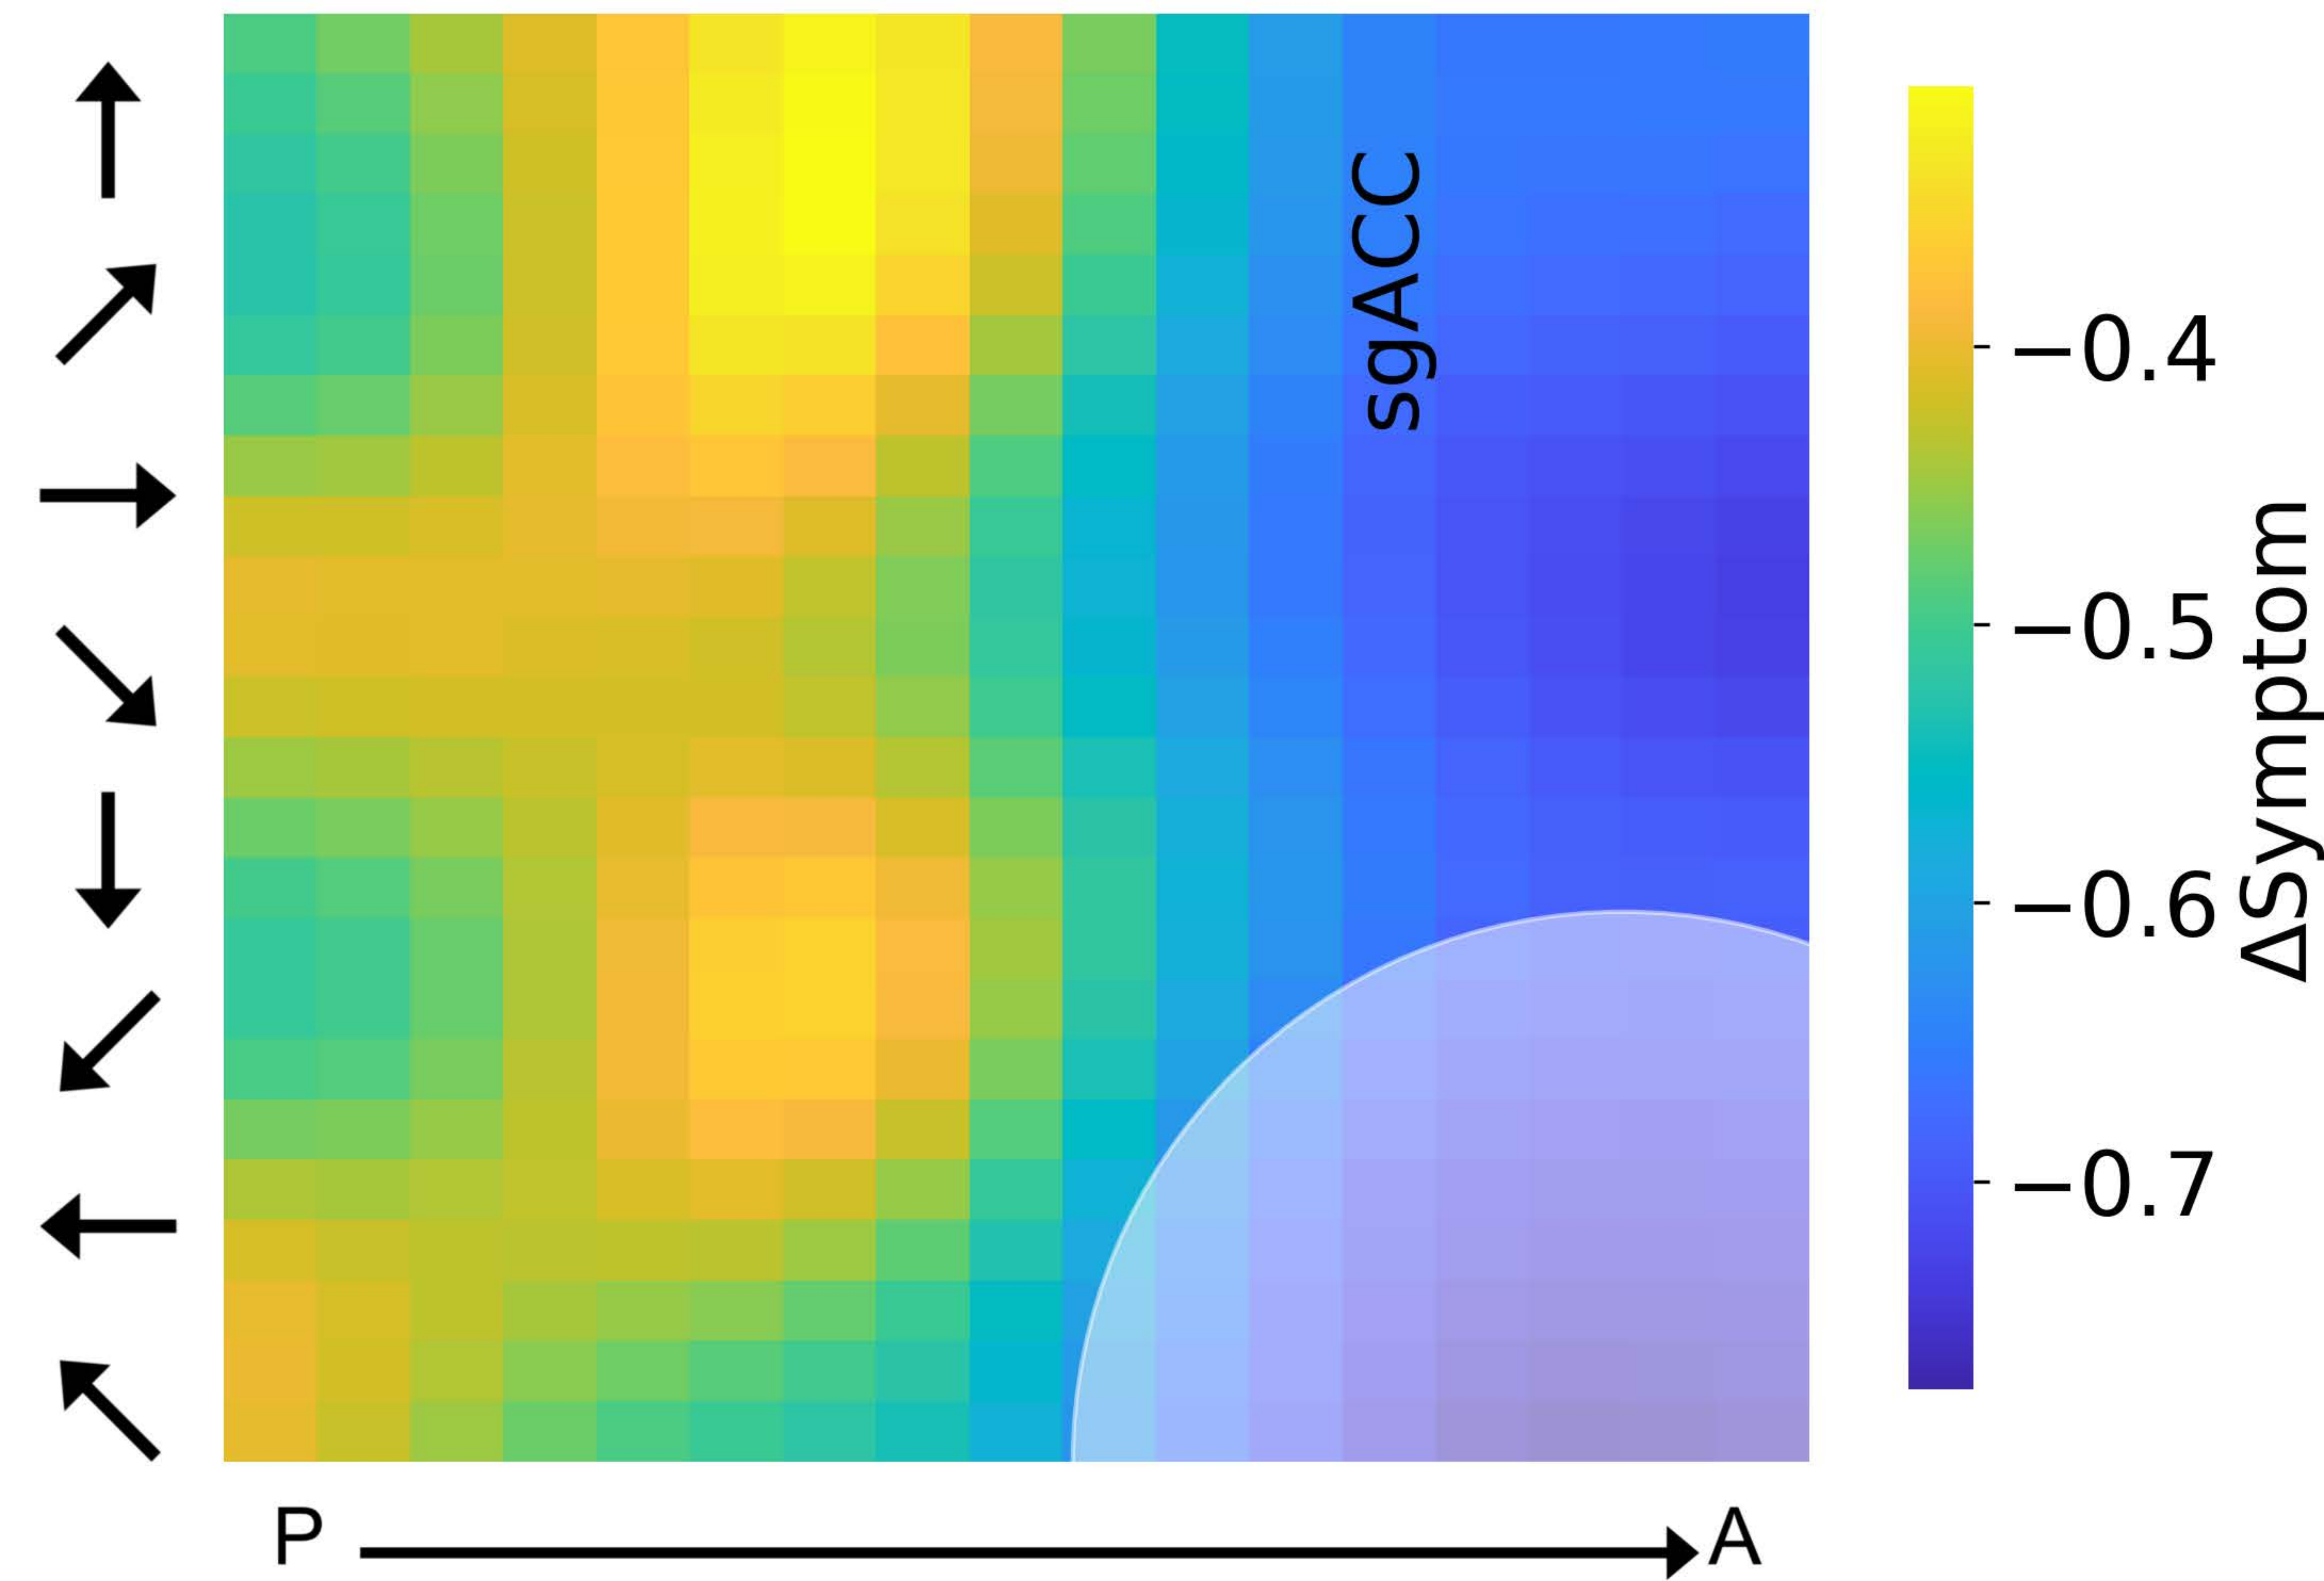



# NDARPK532CVC\_hamd\_left\_dlpfc

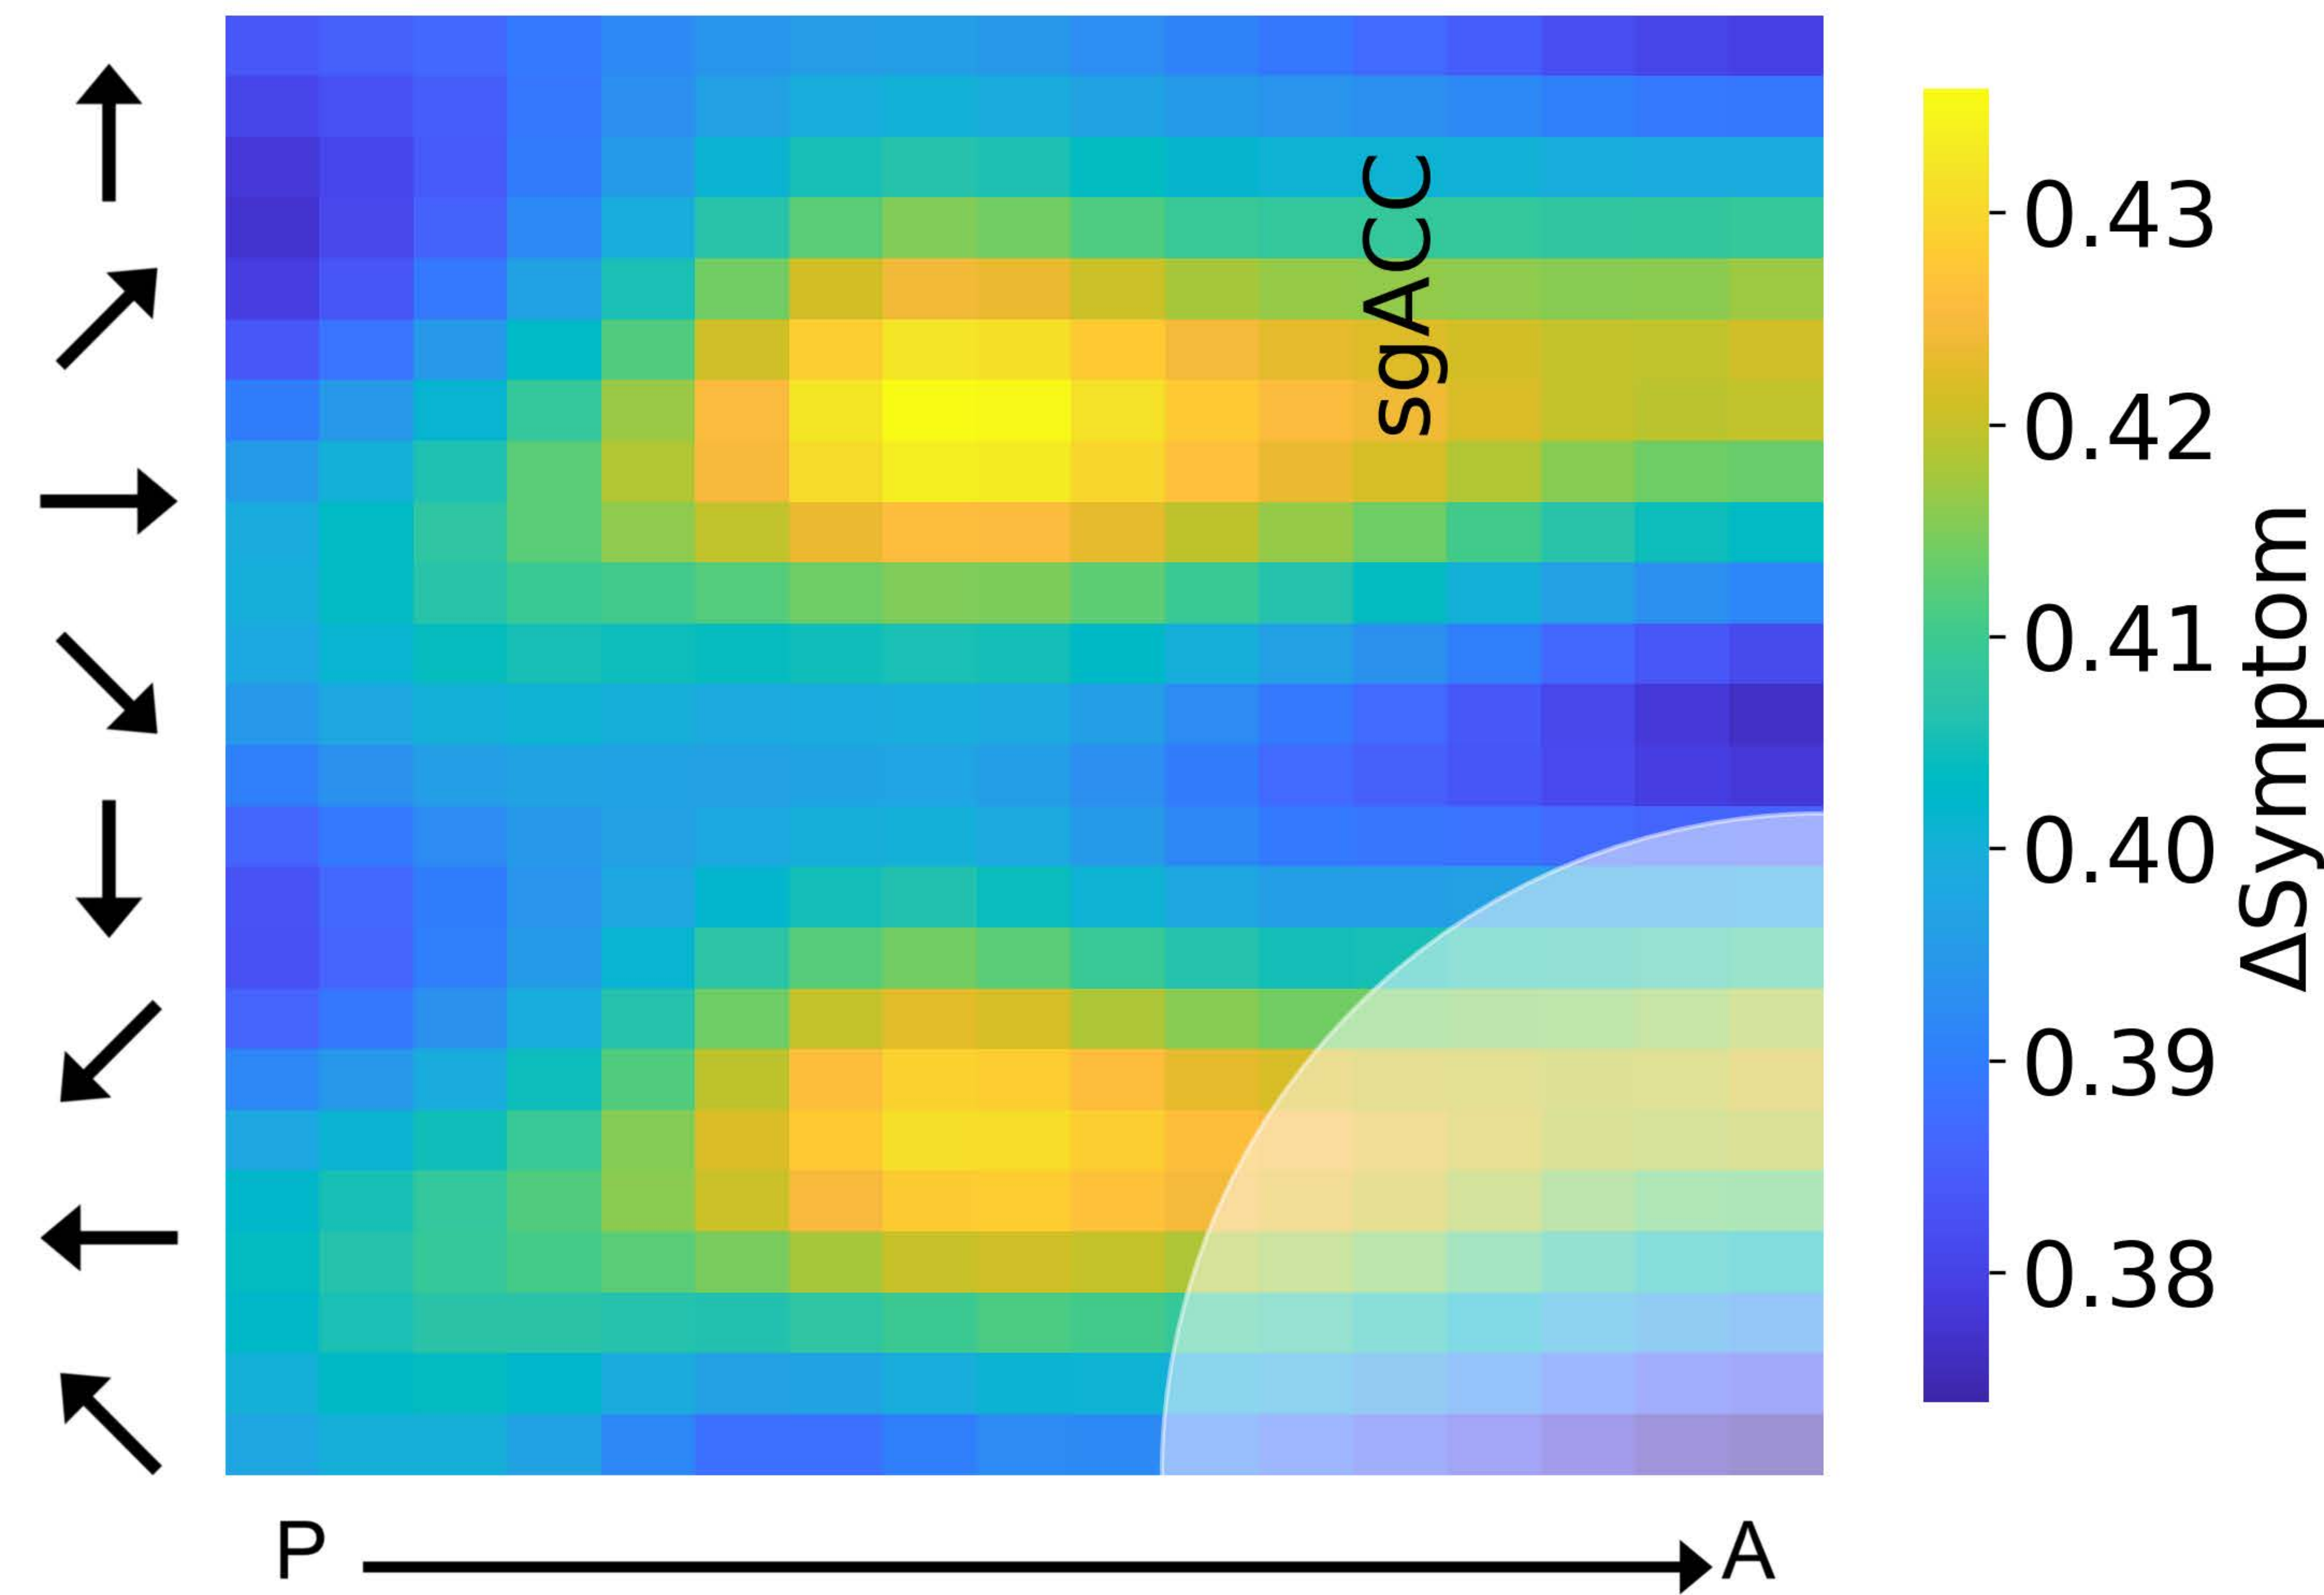



# NDARWK858FA2\_hamd\_left\_dlpfc

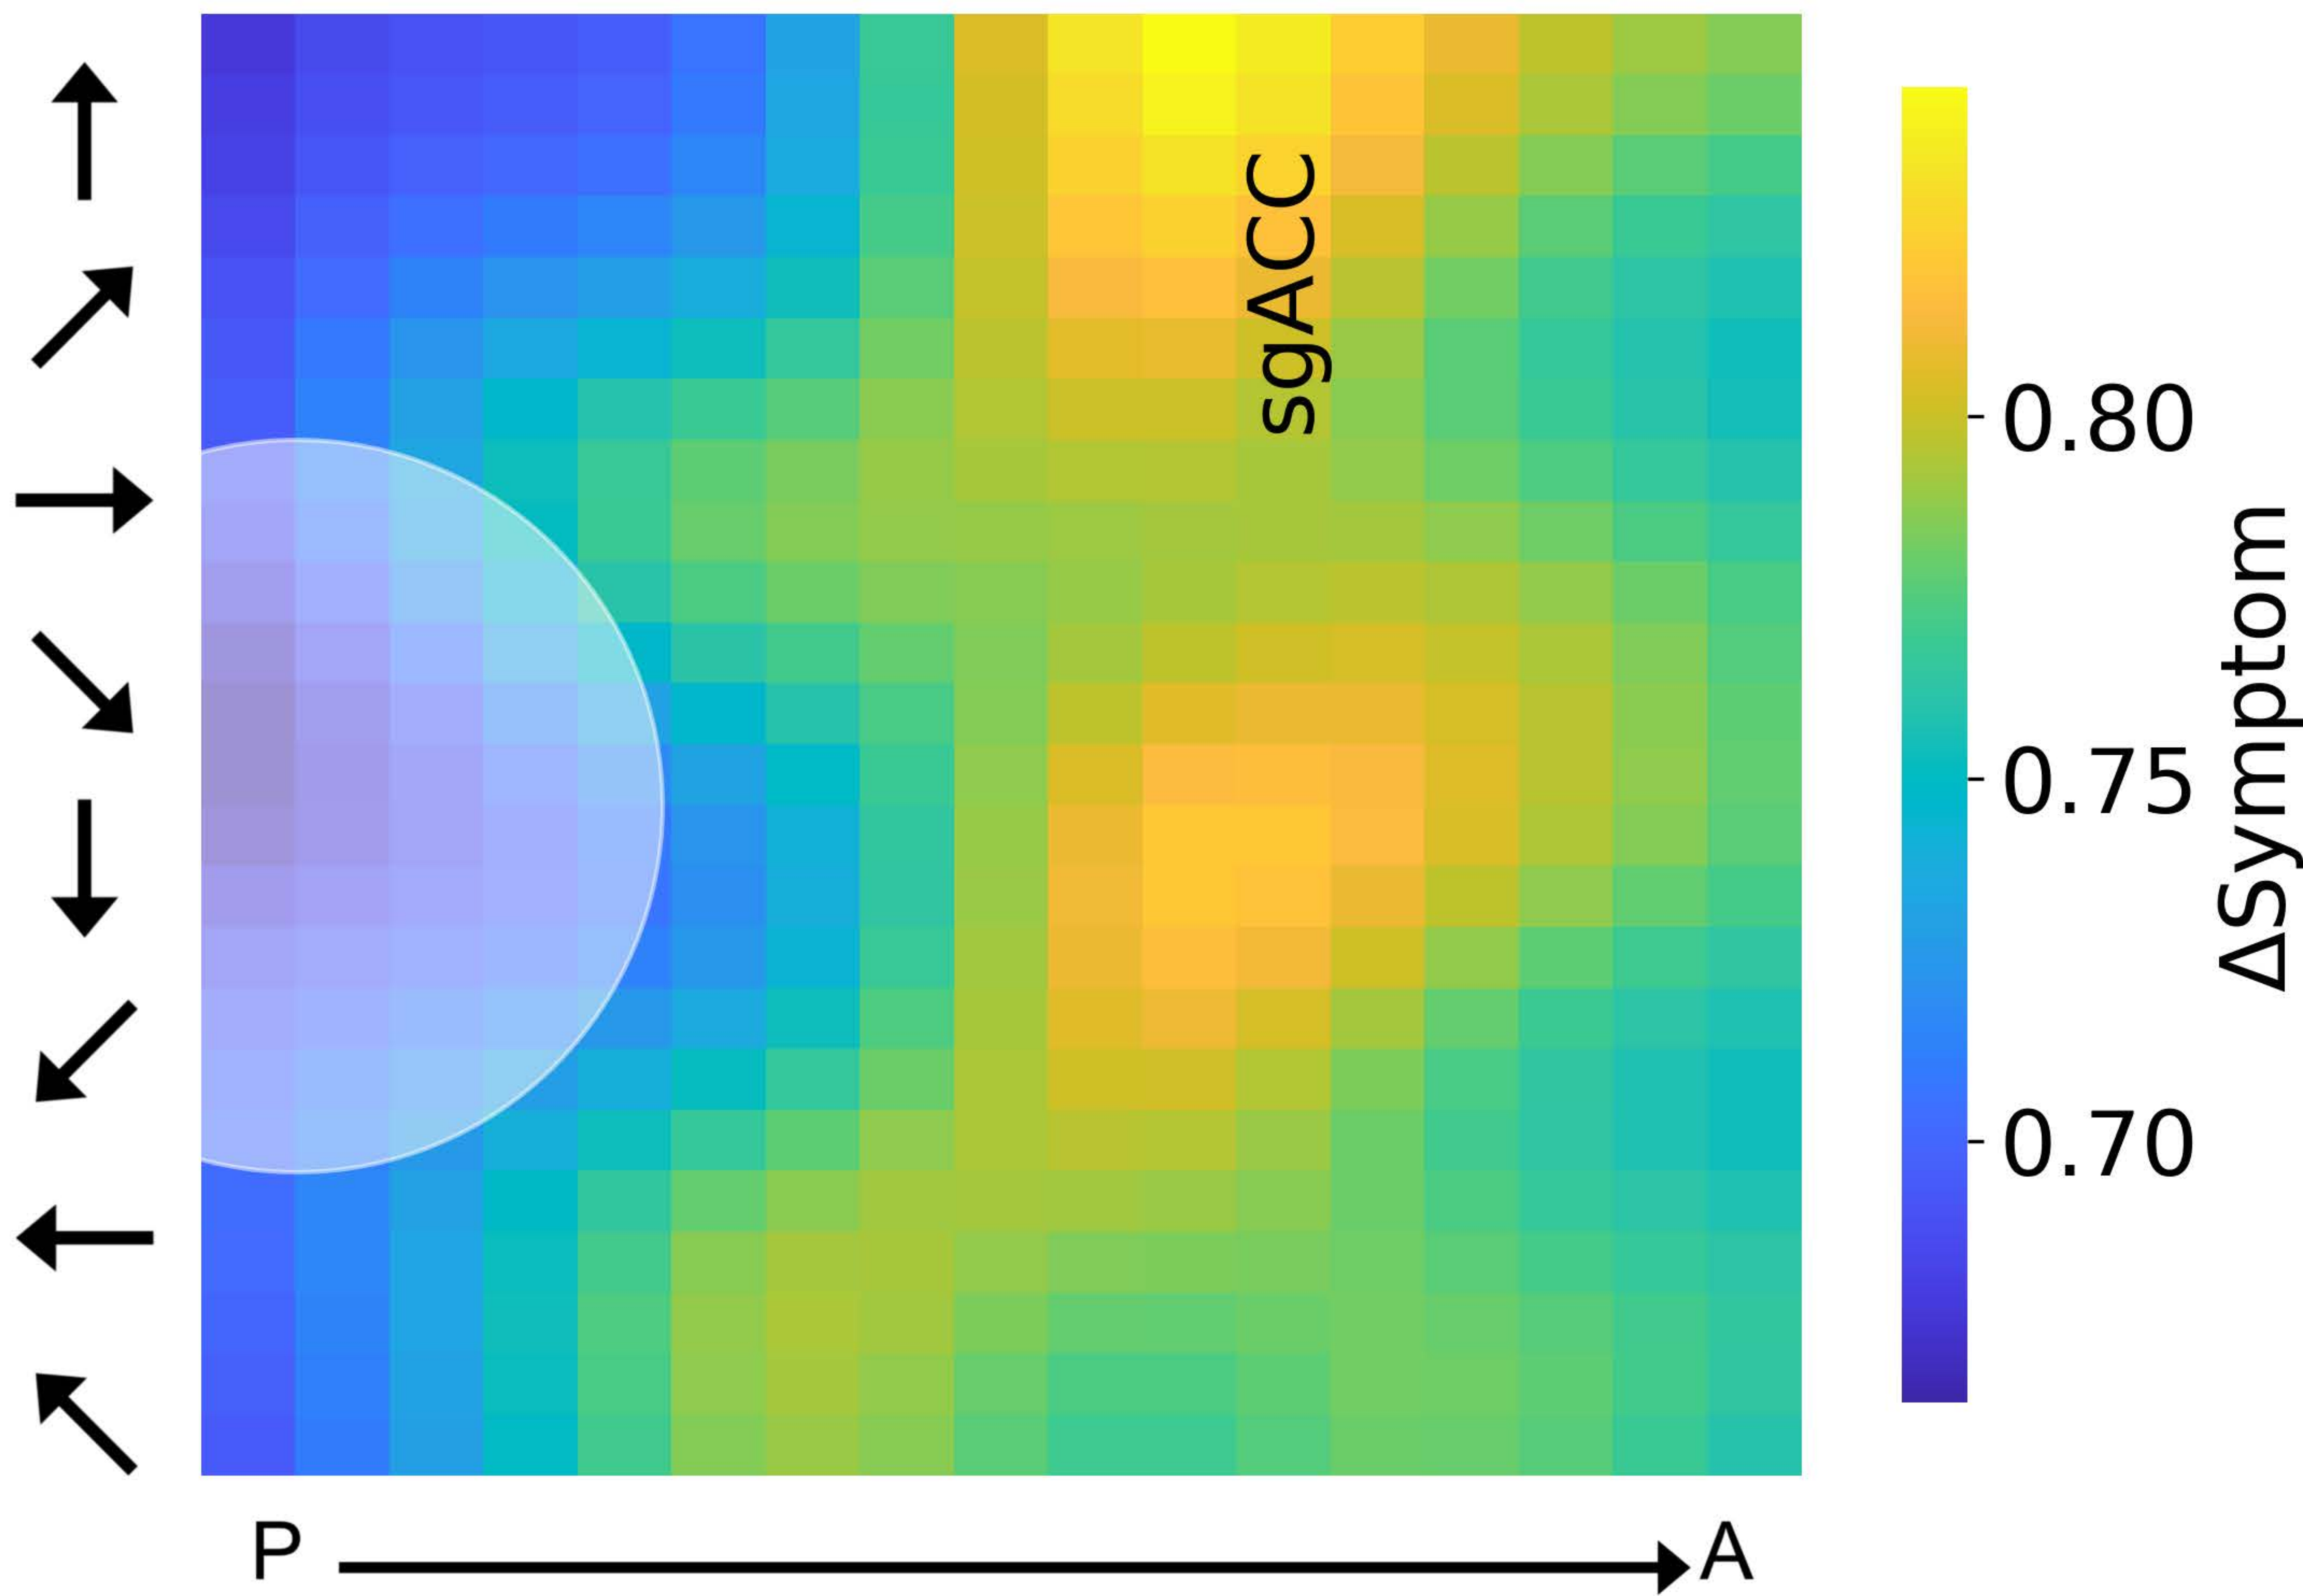



# INDARWM071DRZ\_hamd\_left\_dlpfc

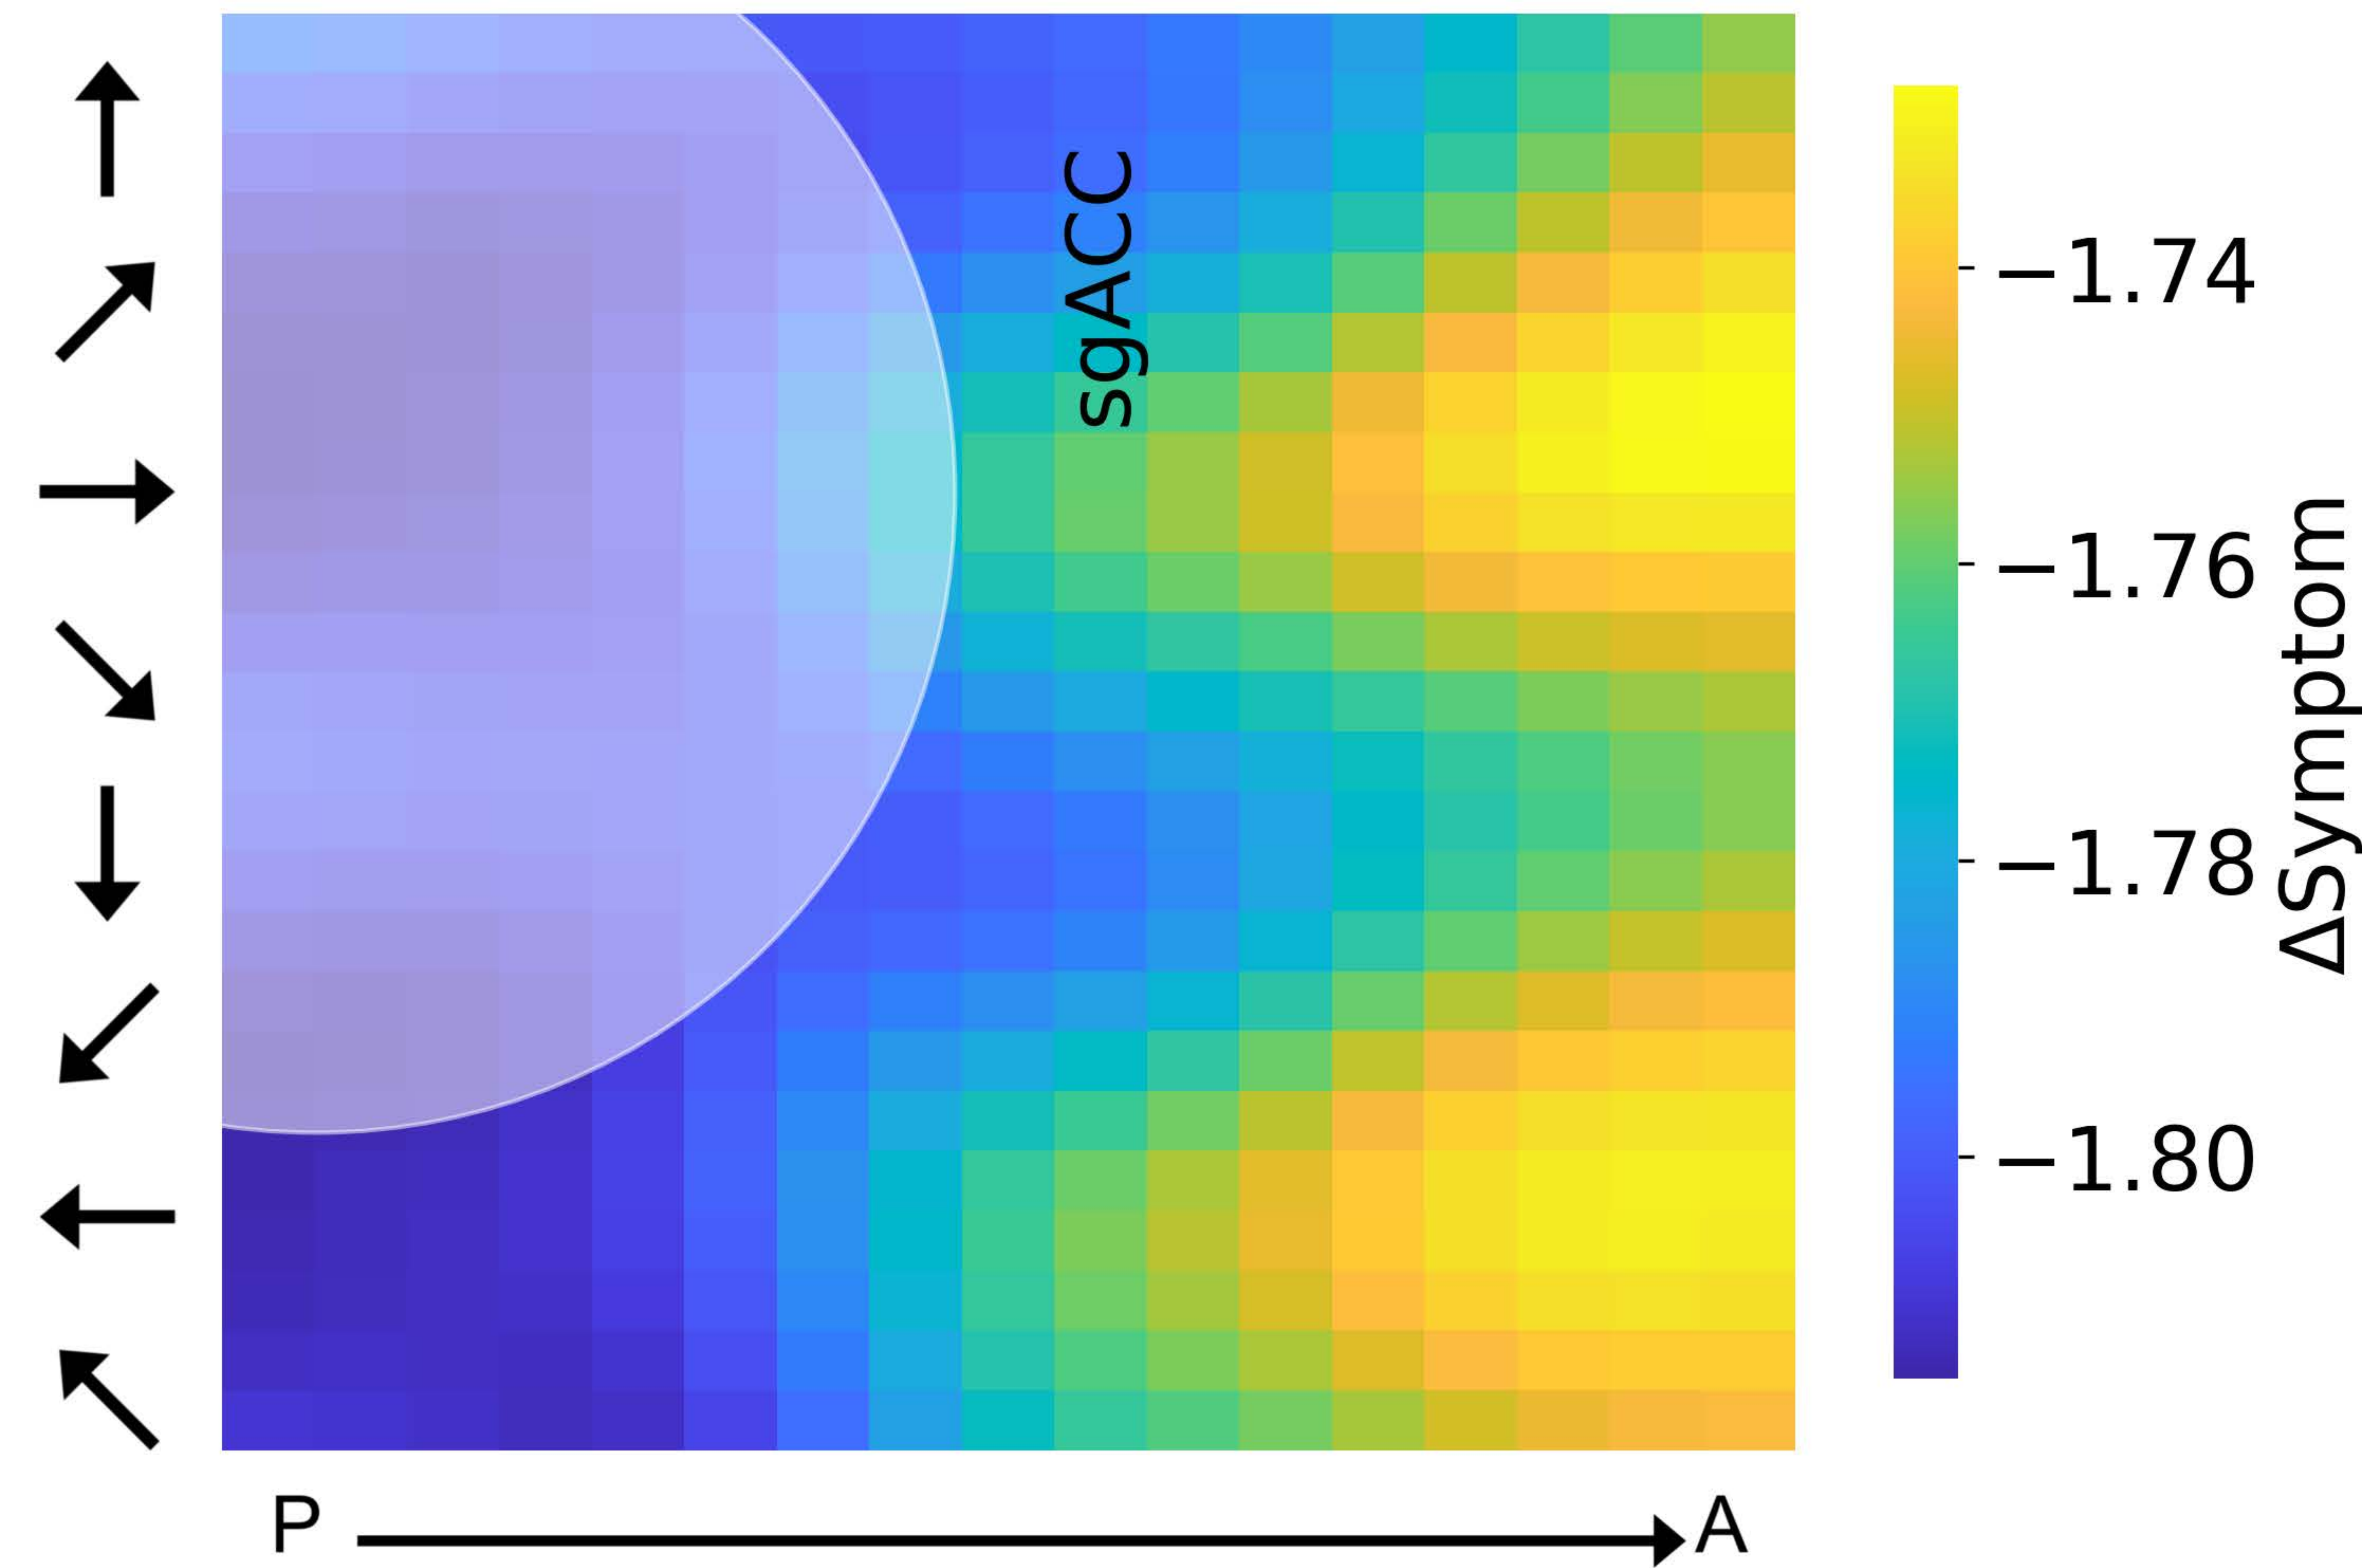



# INDARWT226PU5\_hamd\_left\_dlpfc

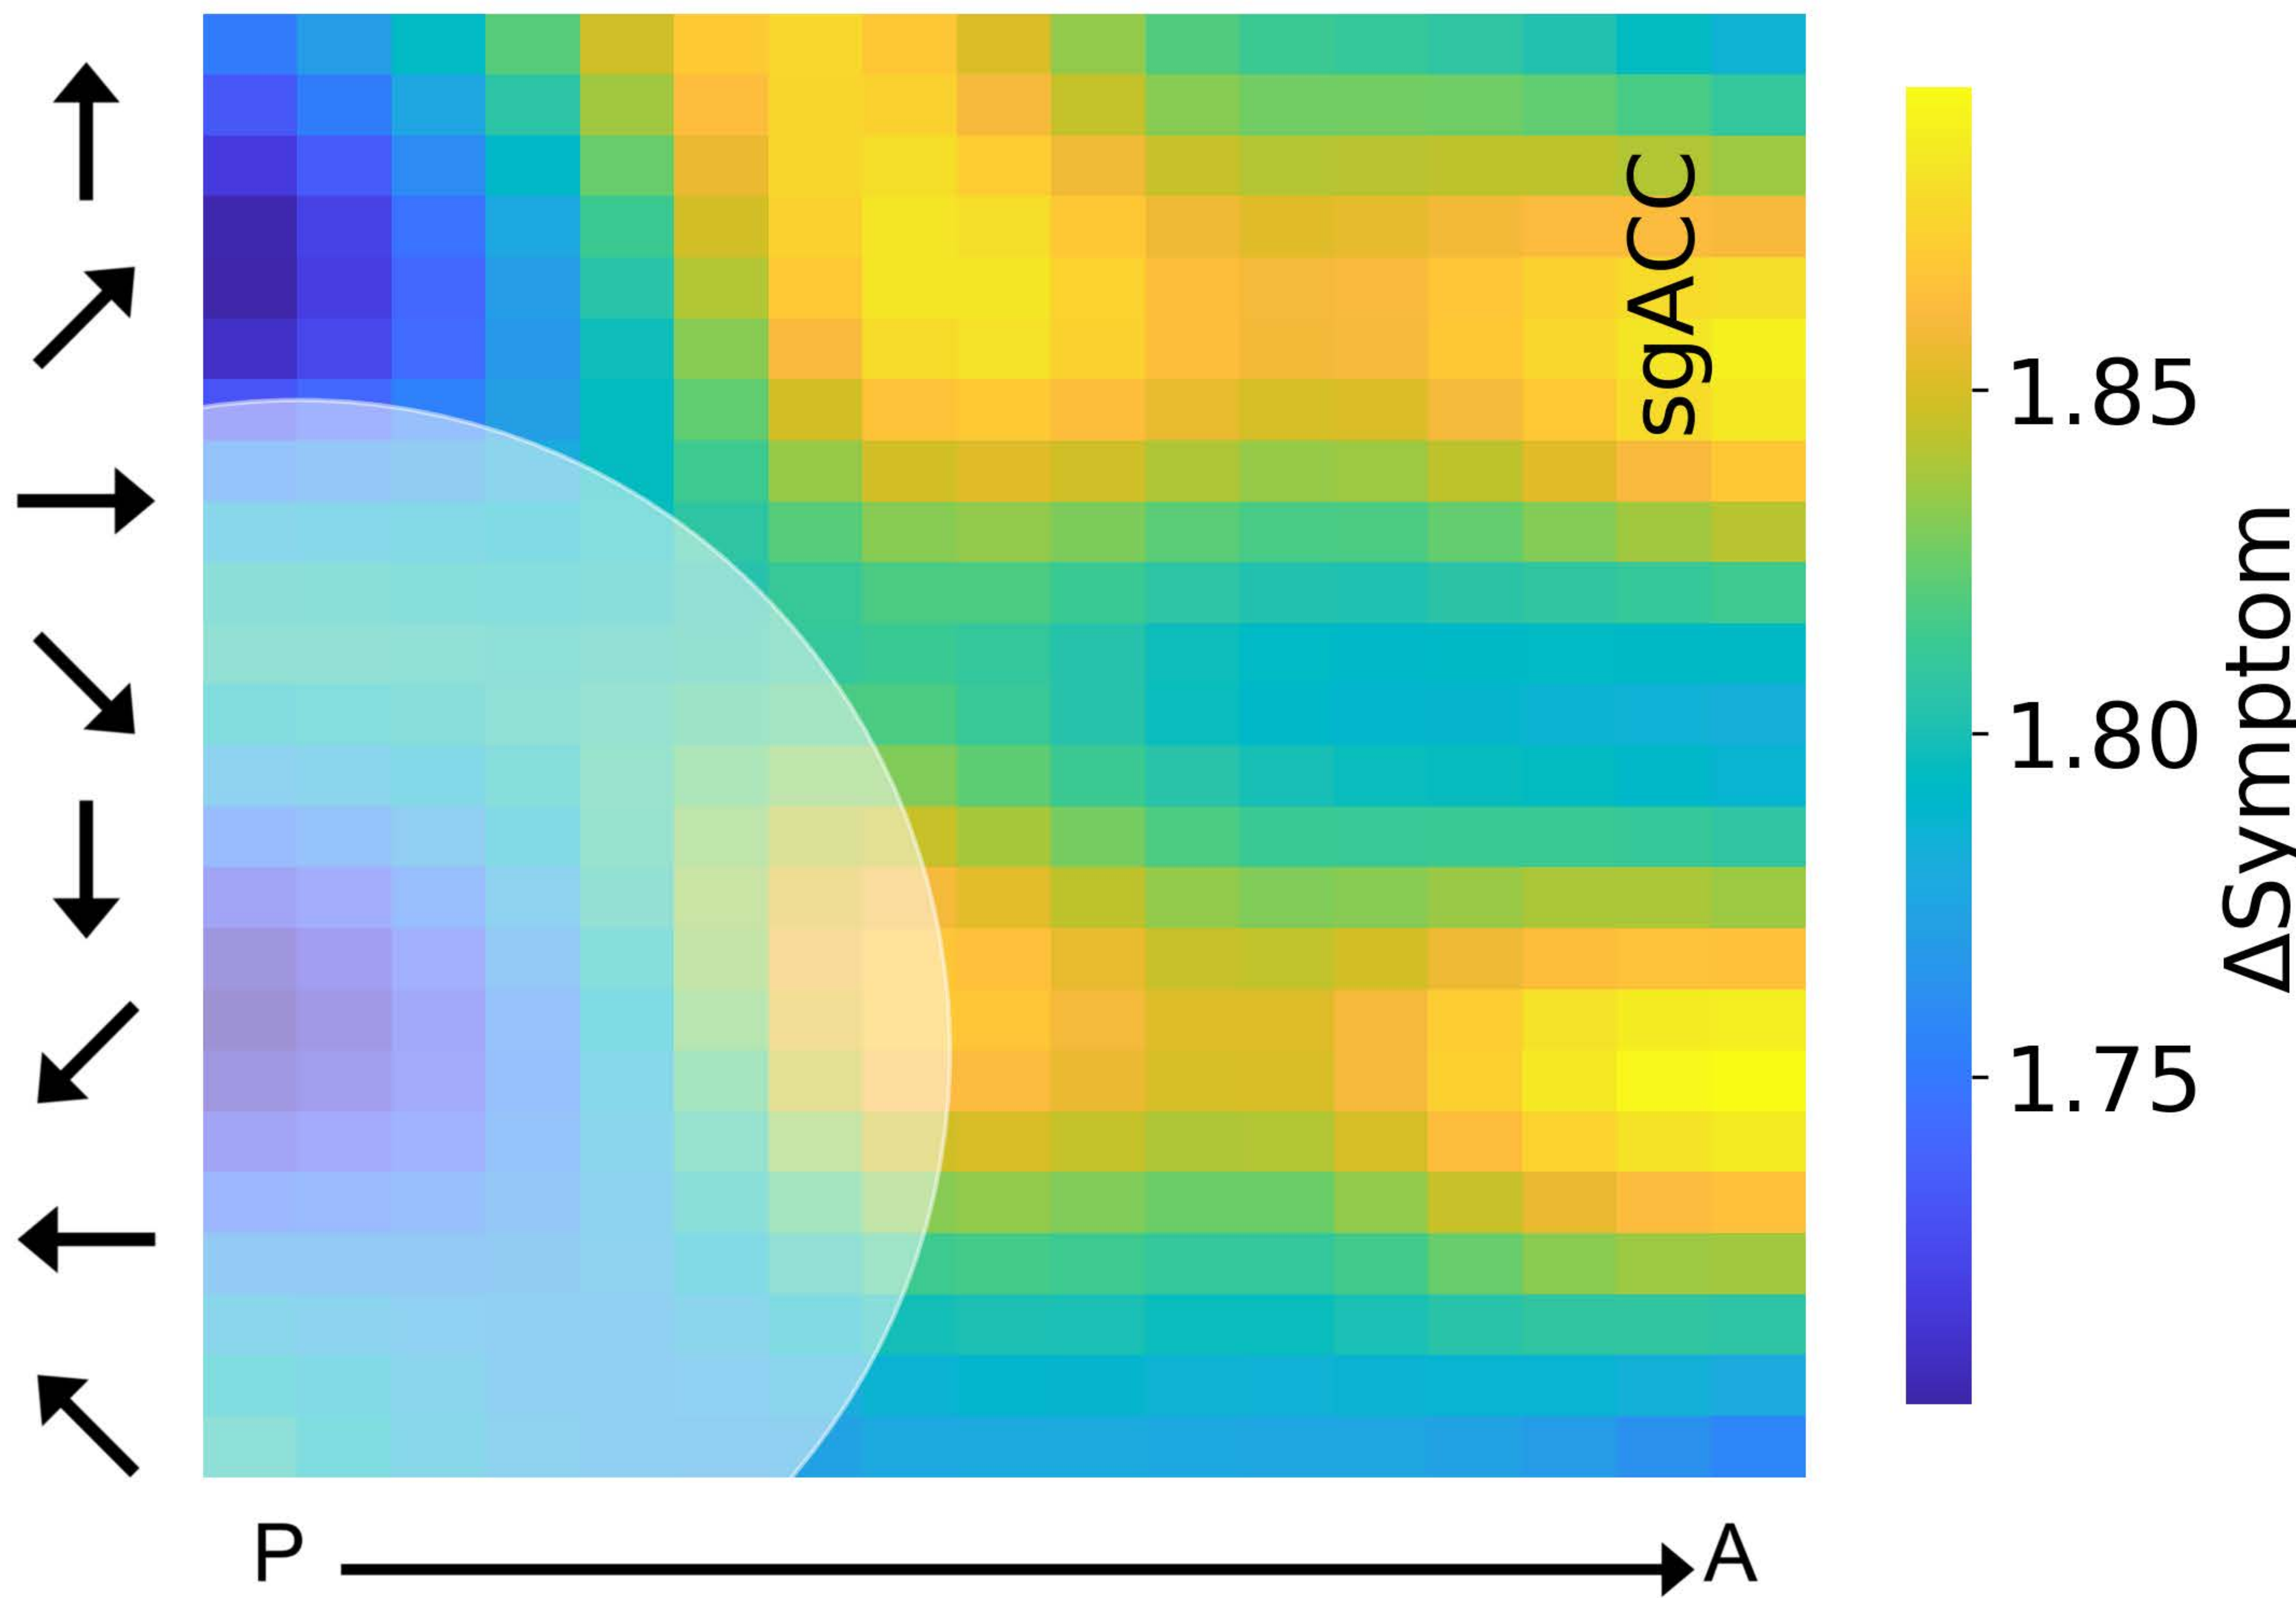



# INDARWU139LAY\_hamd\_left\_dlpfc

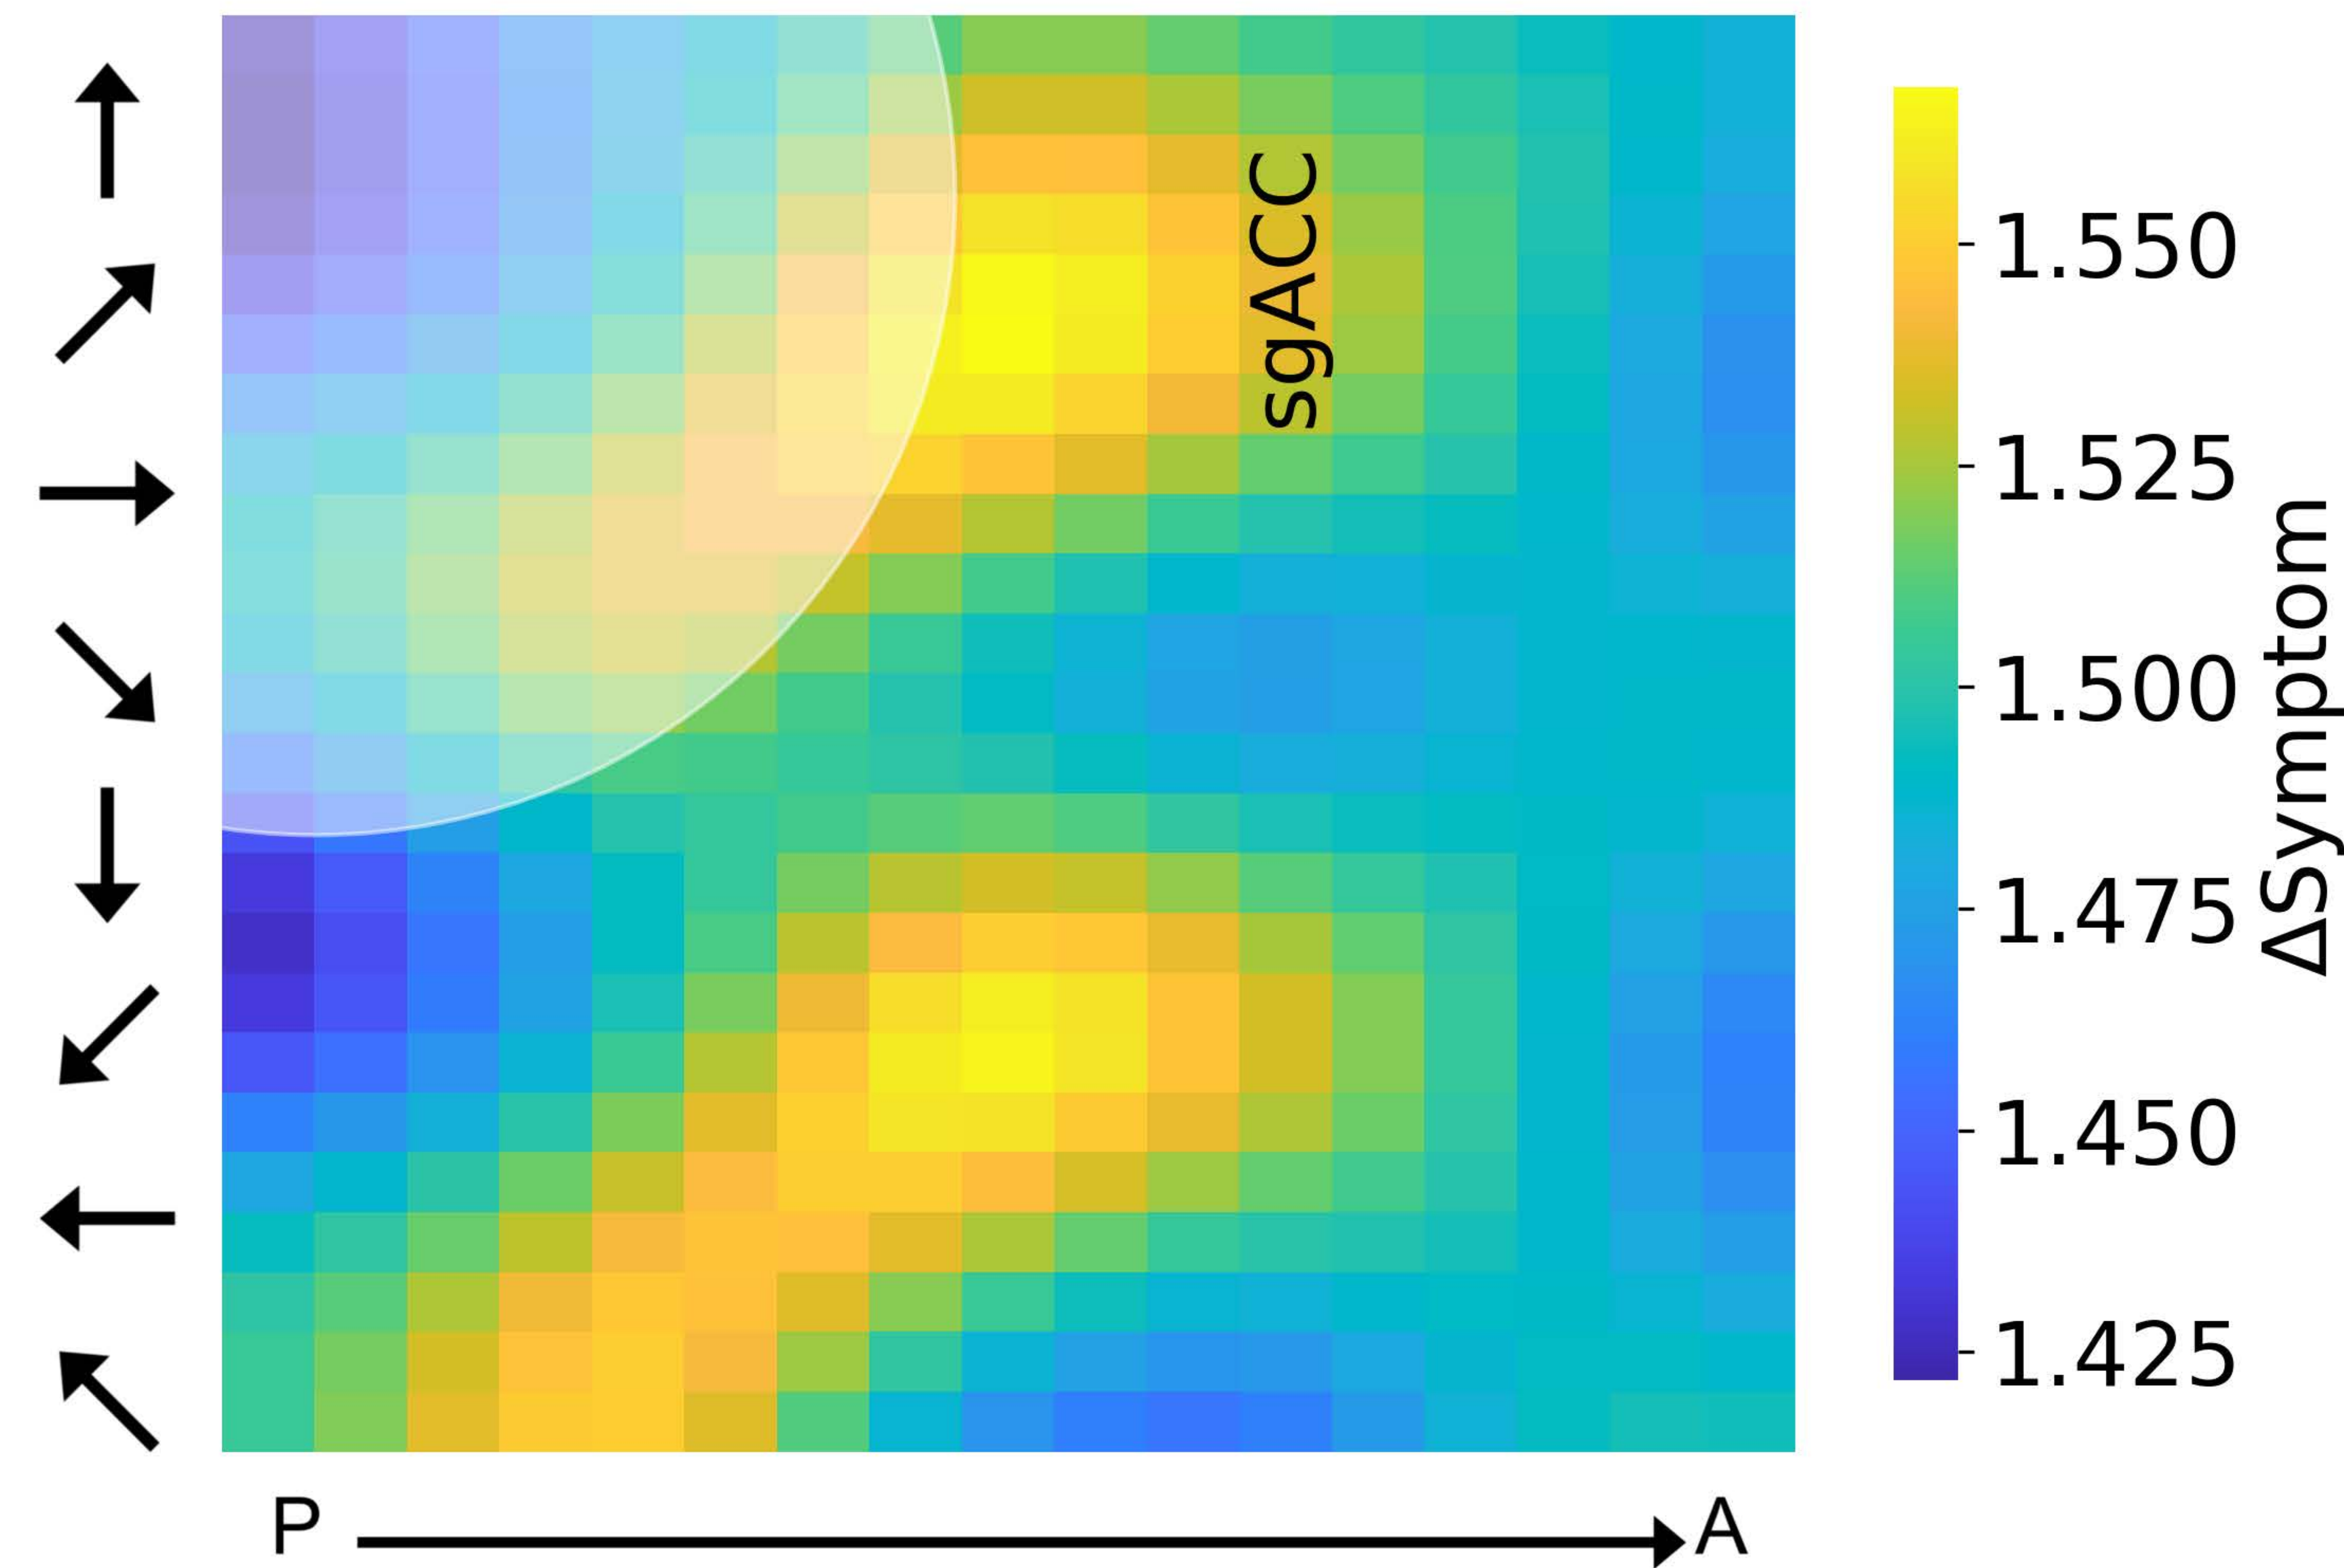



# NDARXH480BBY\_hamd\_left\_dlpfc

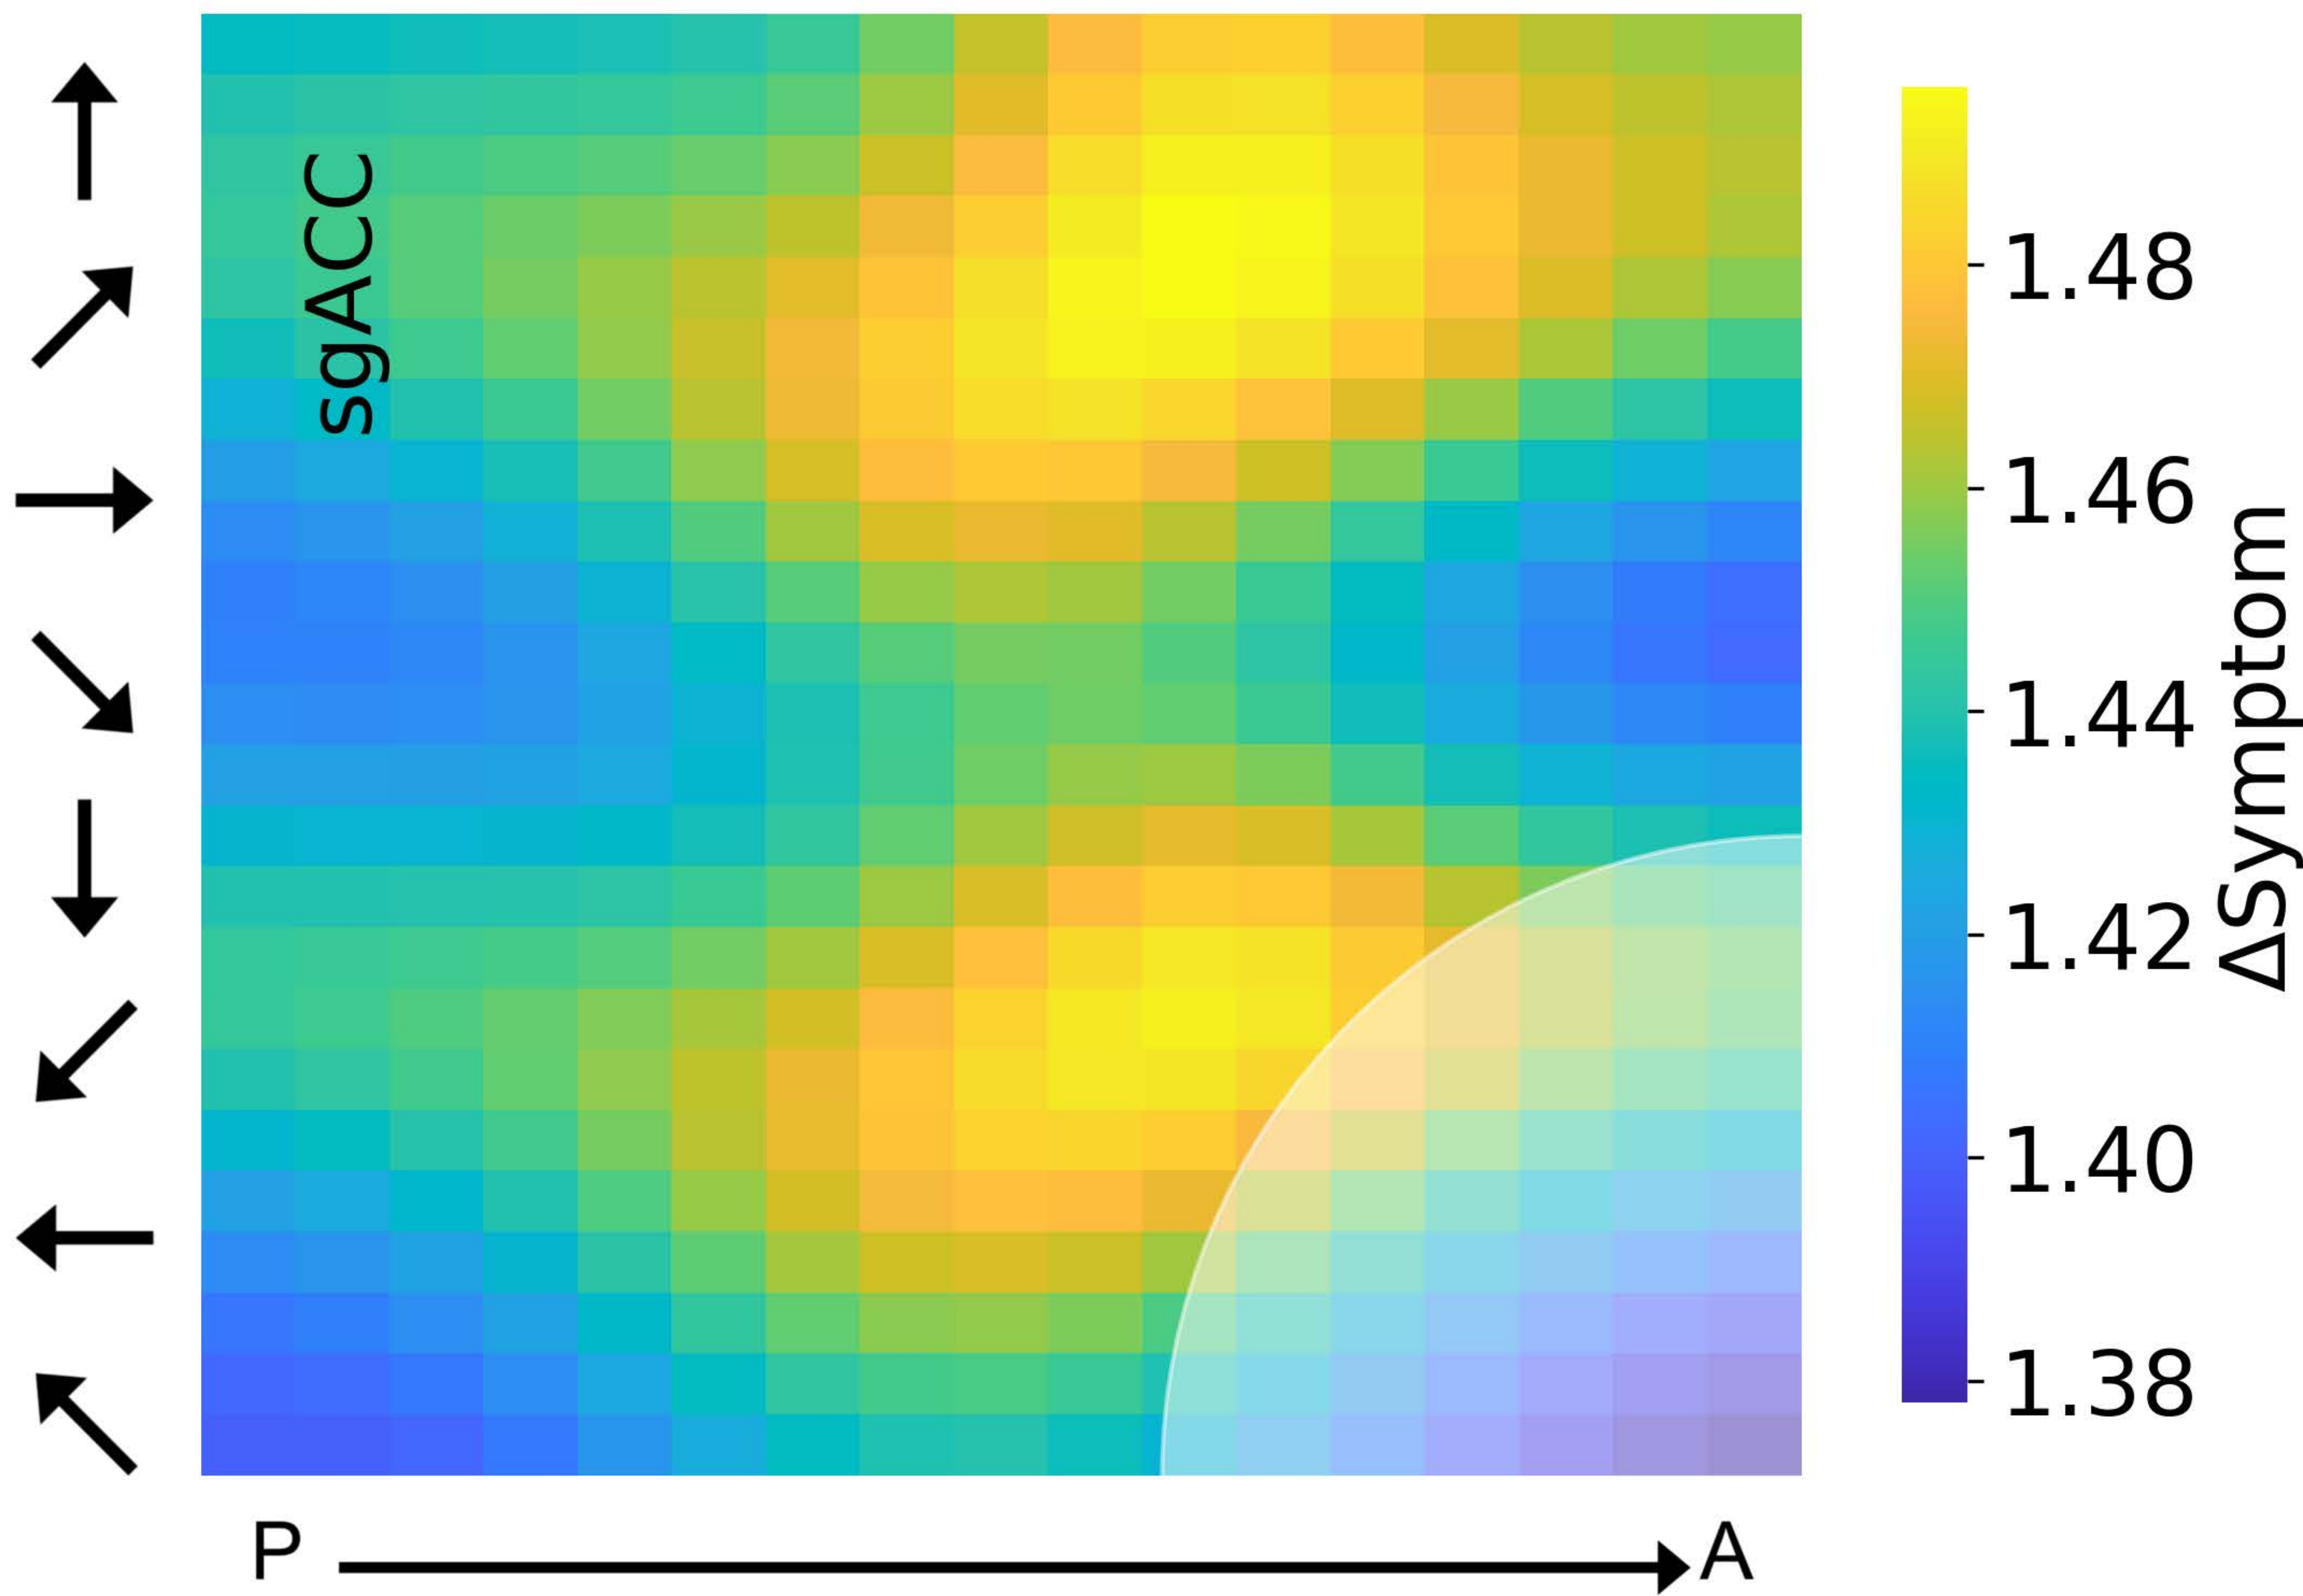



# NDARXU558HYG\_hamd\_left\_dlpfc

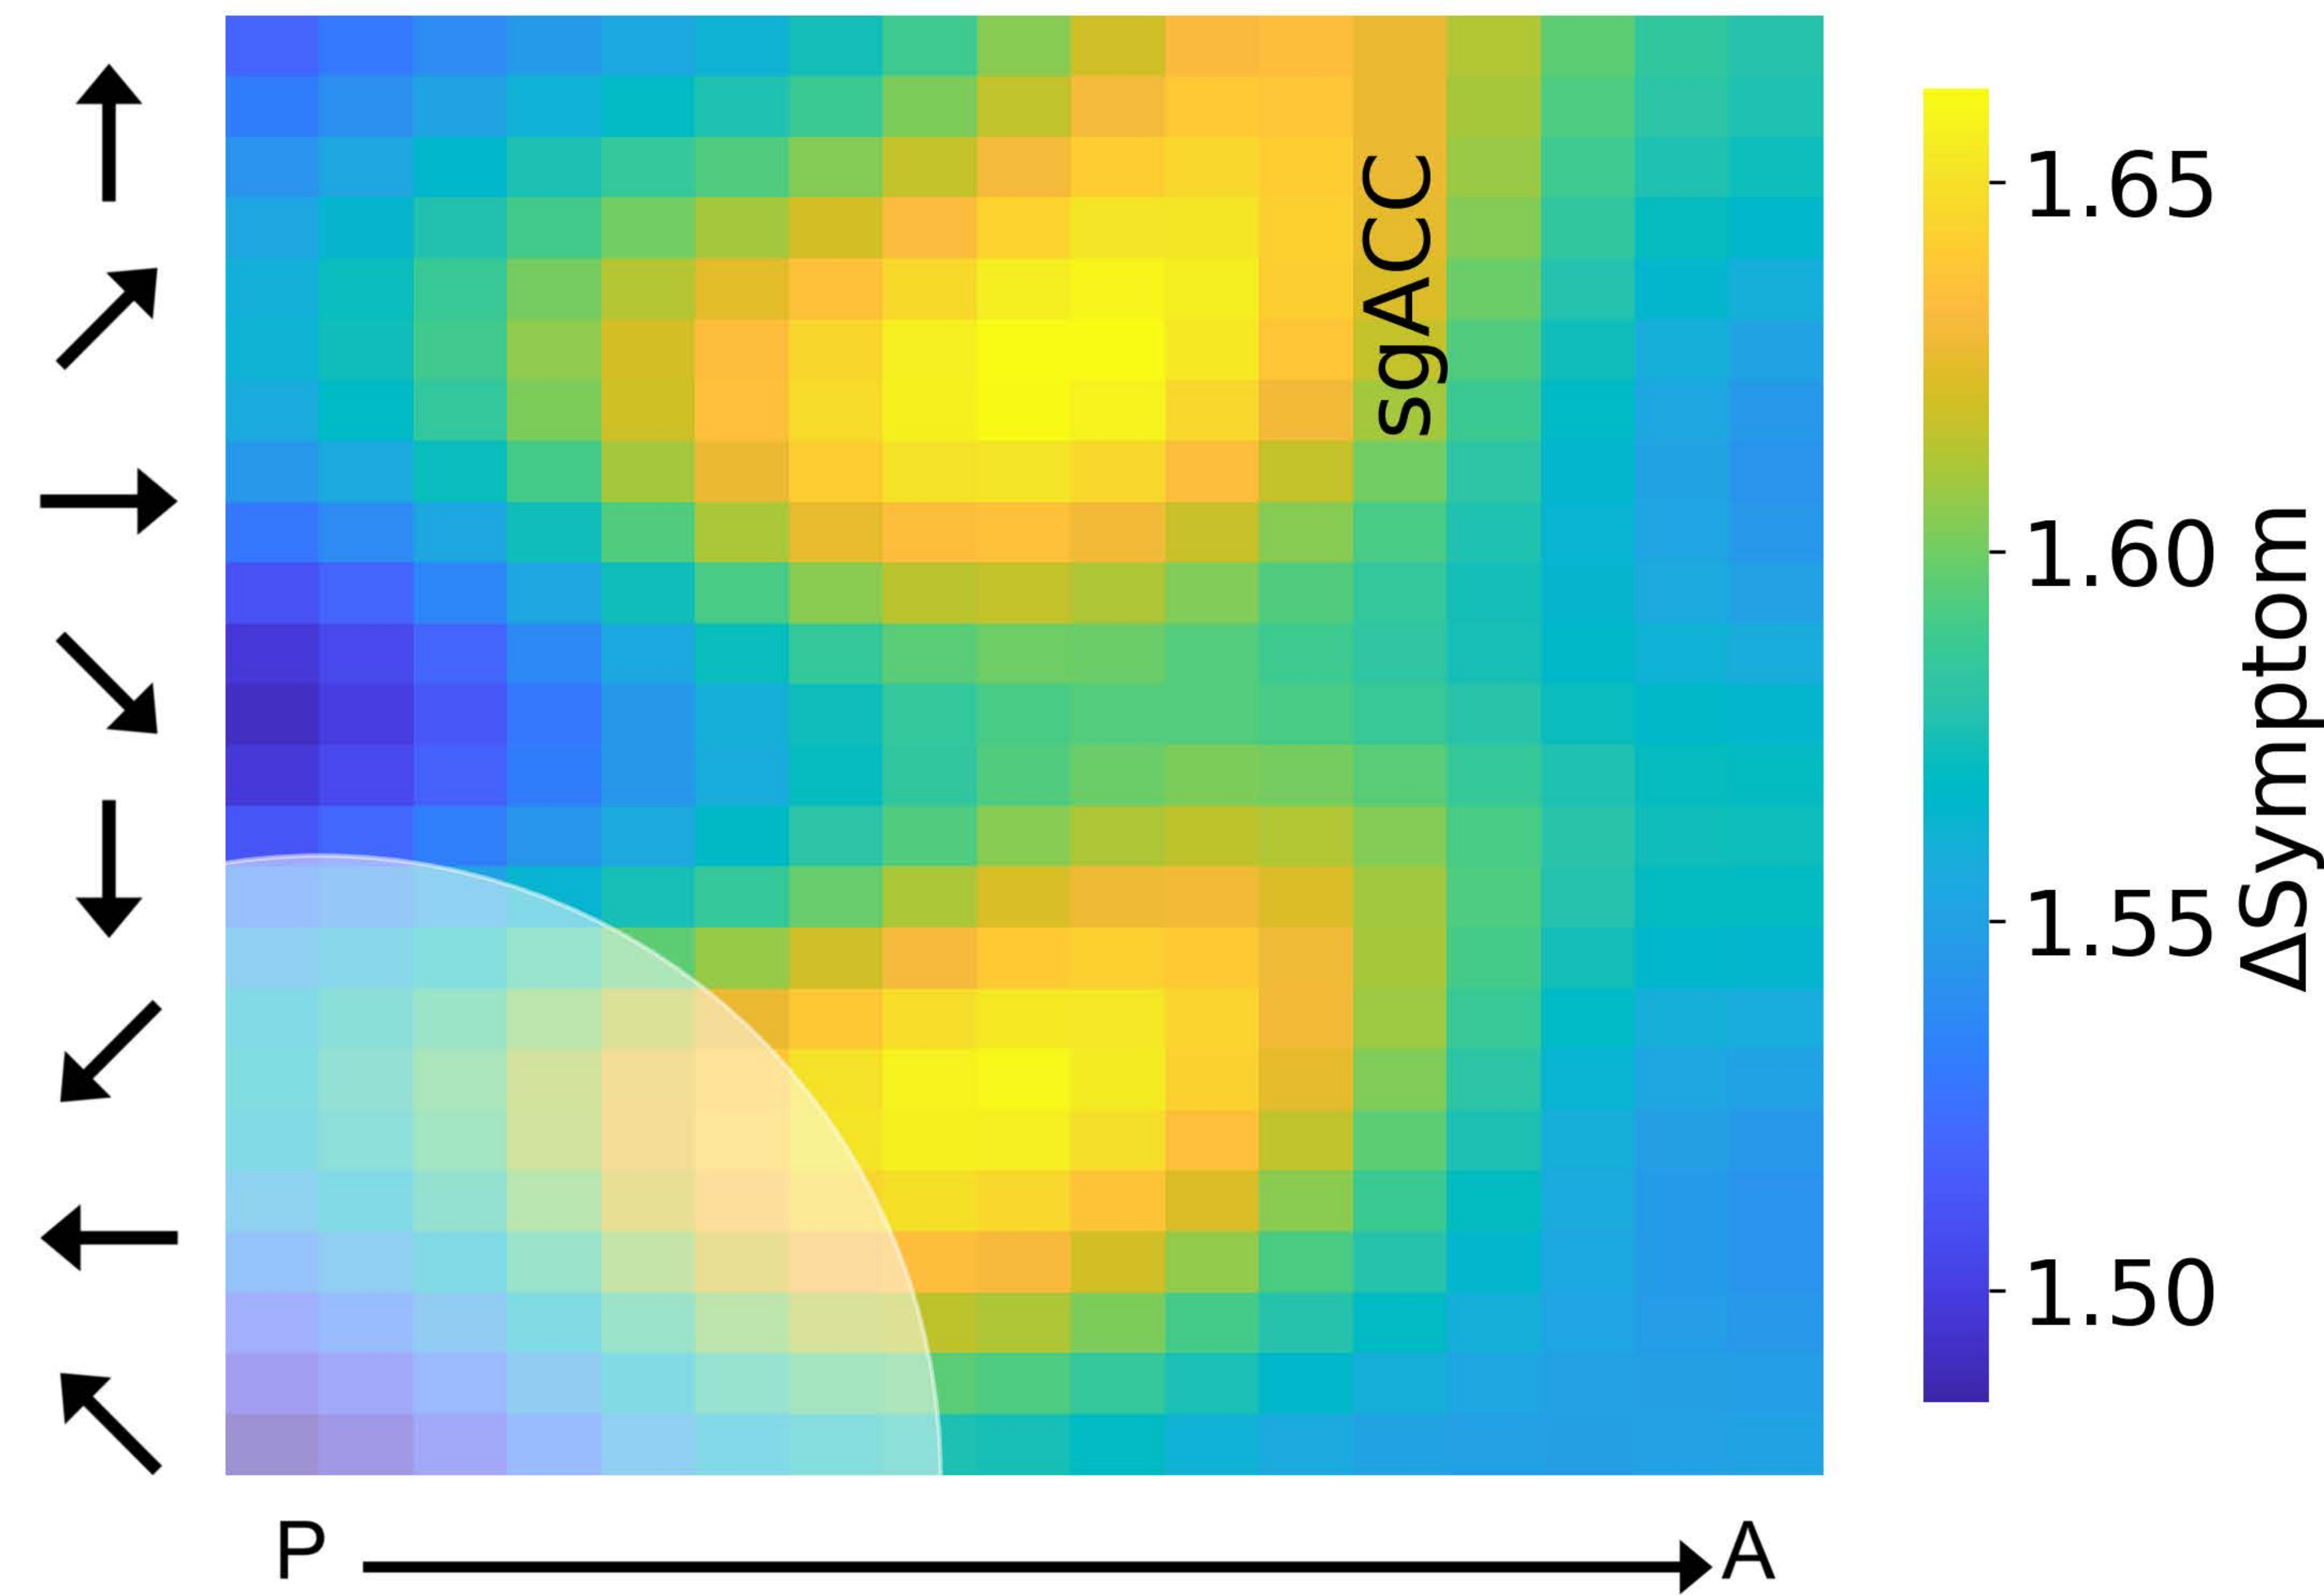



# NDARZW884MZC\_hamd\_left\_dlpfc

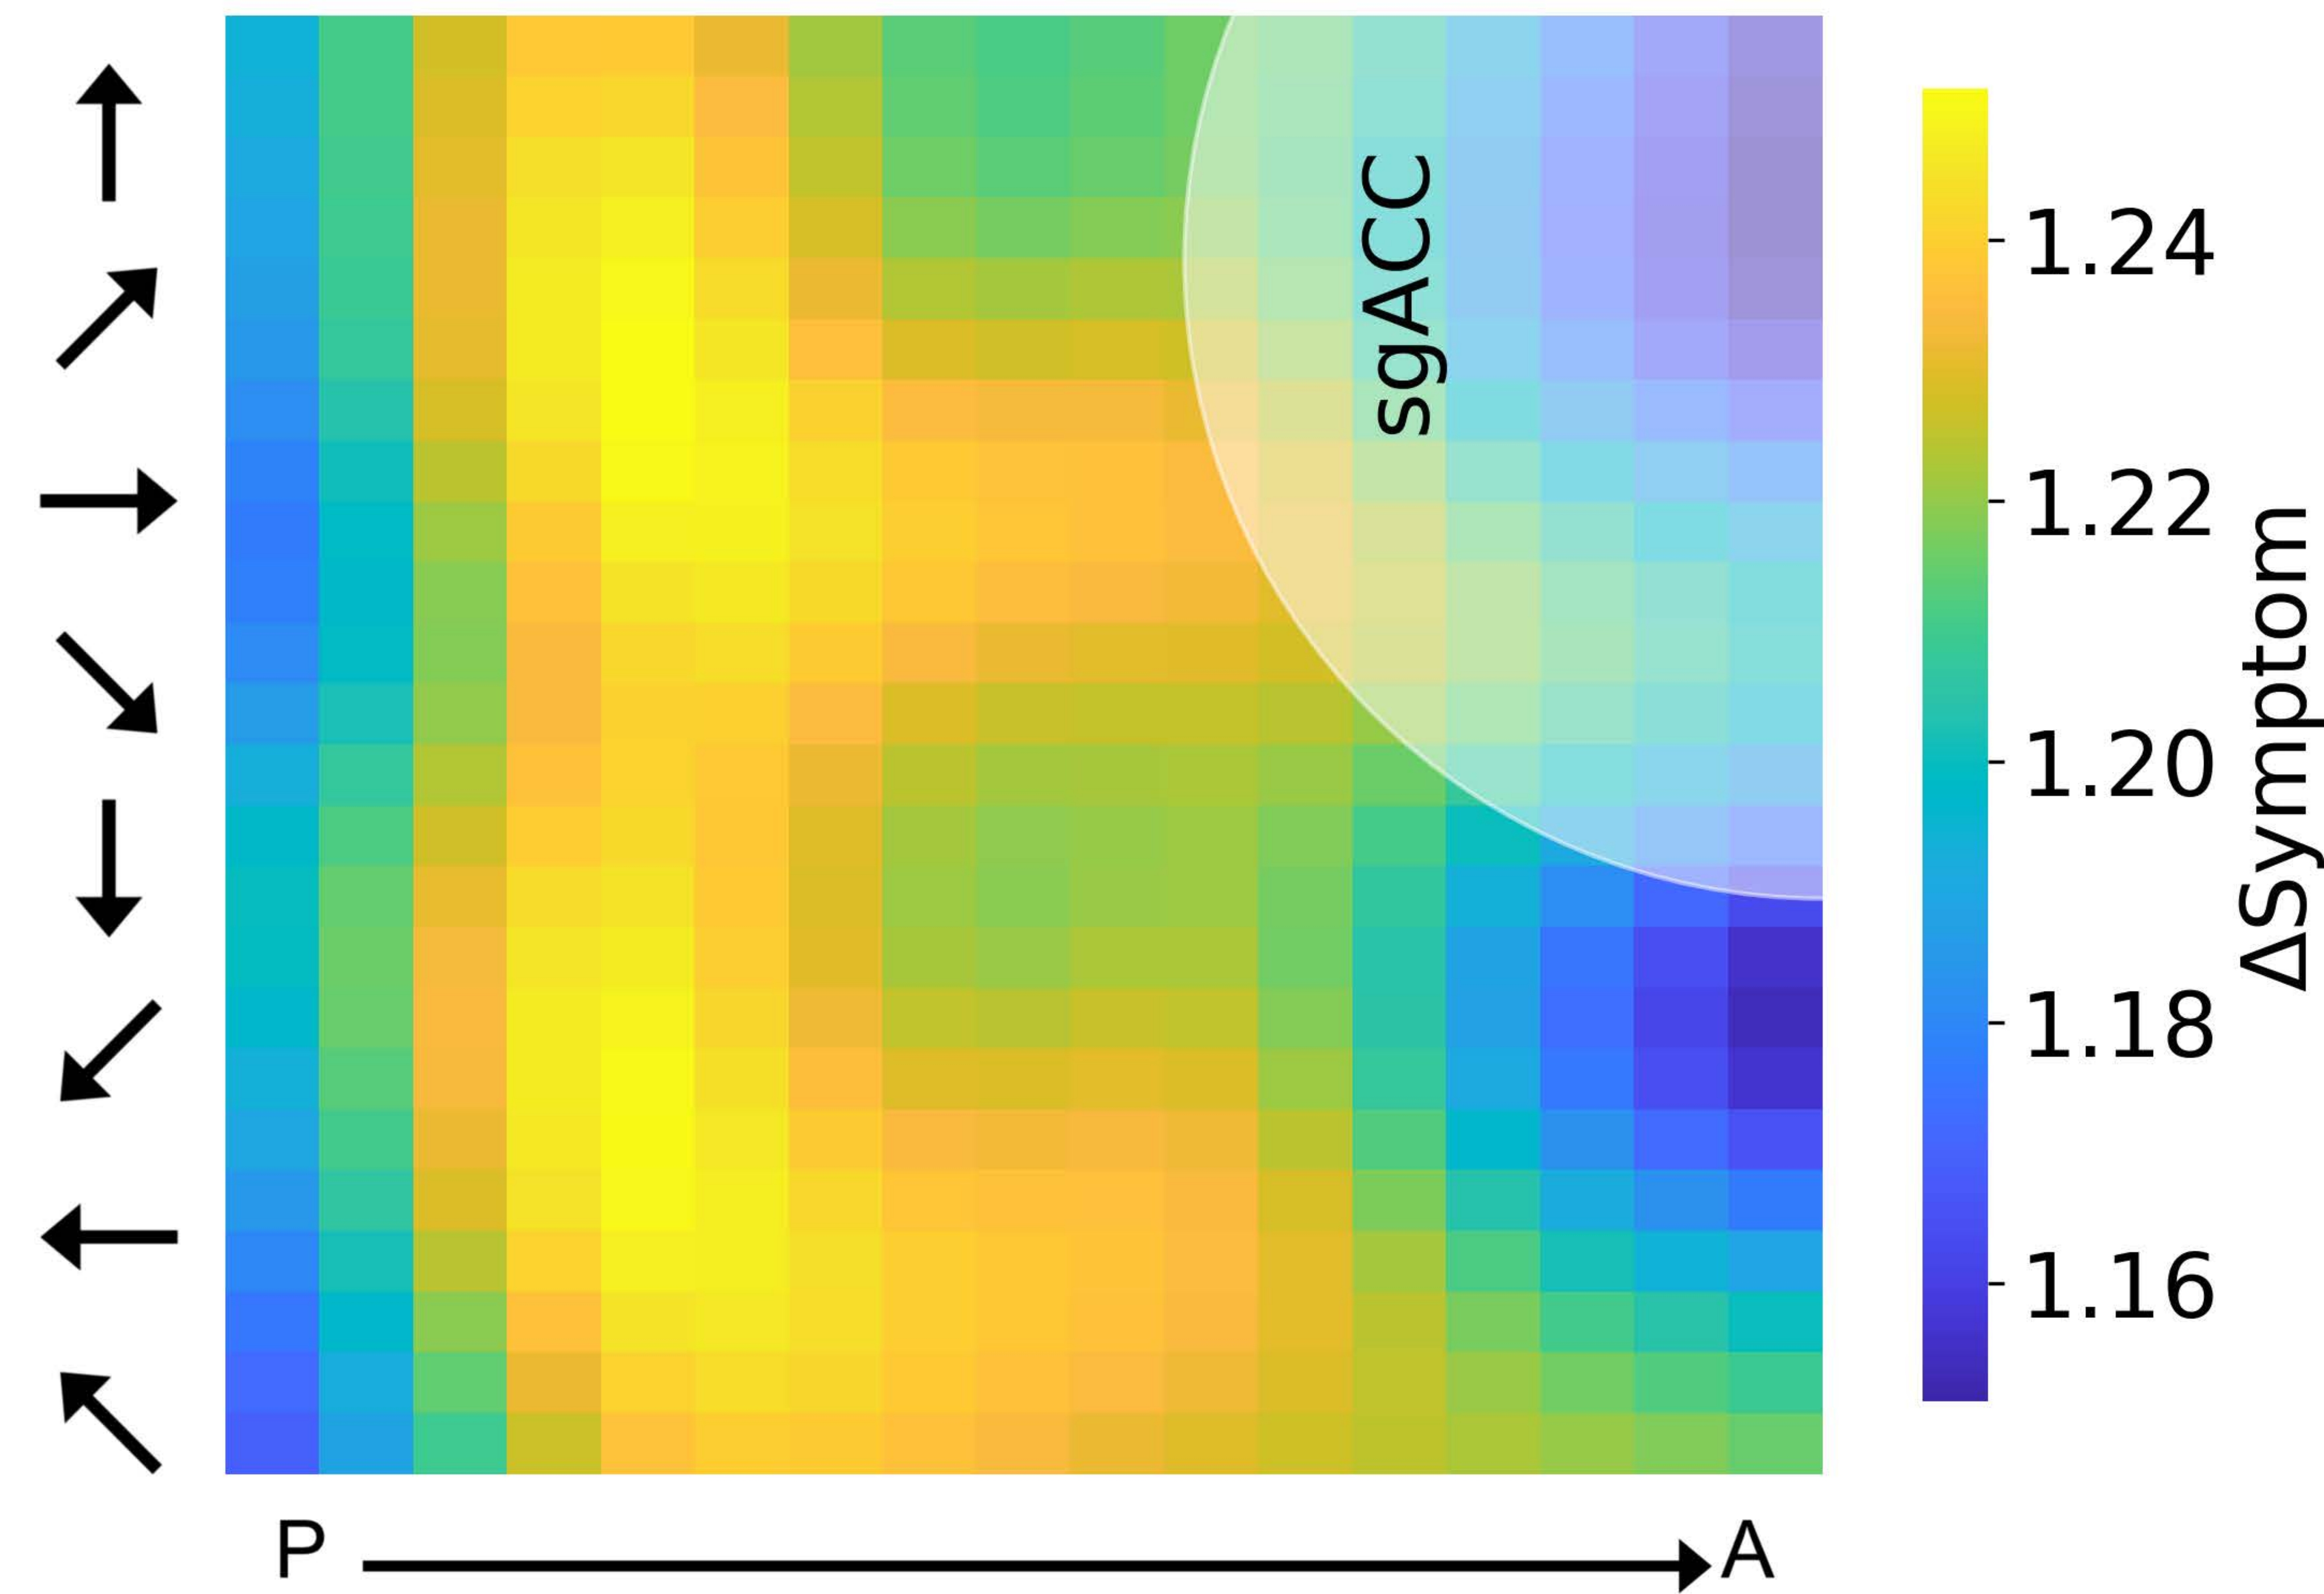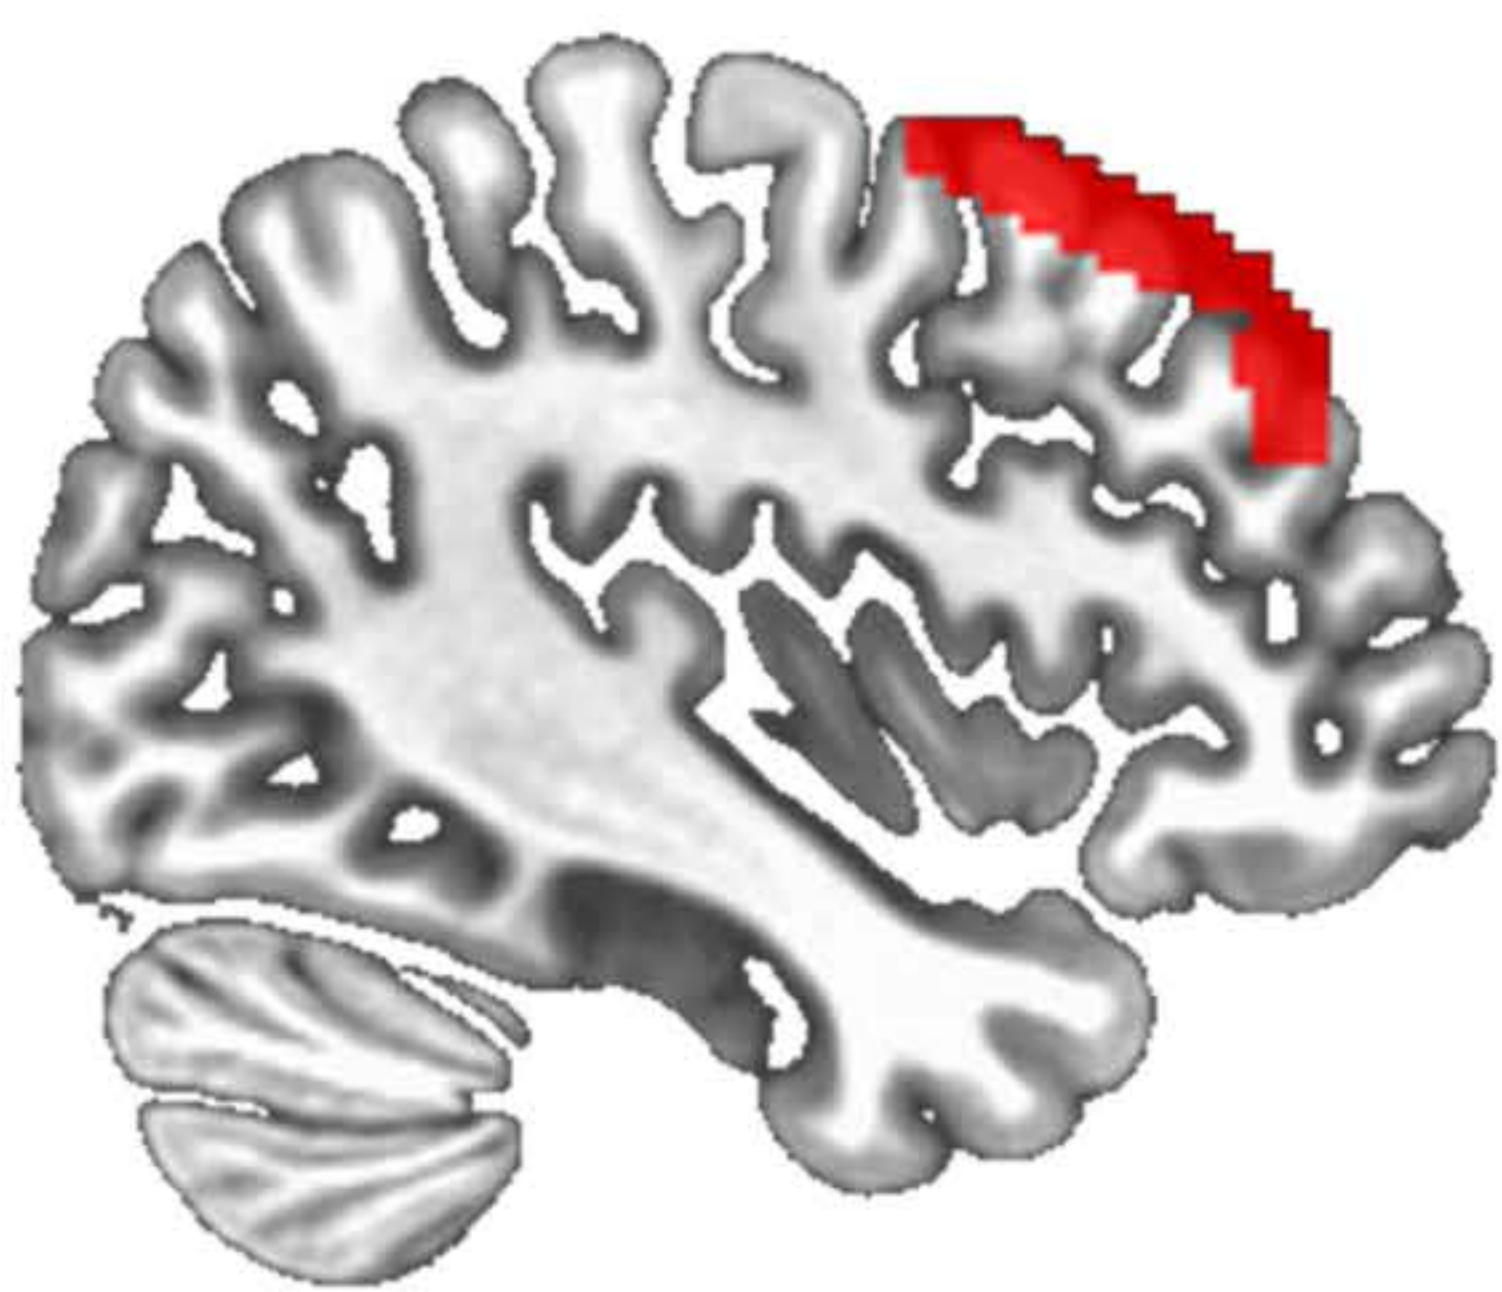



# INDARAC286ZE7\_hamd\_right\_dlpfc

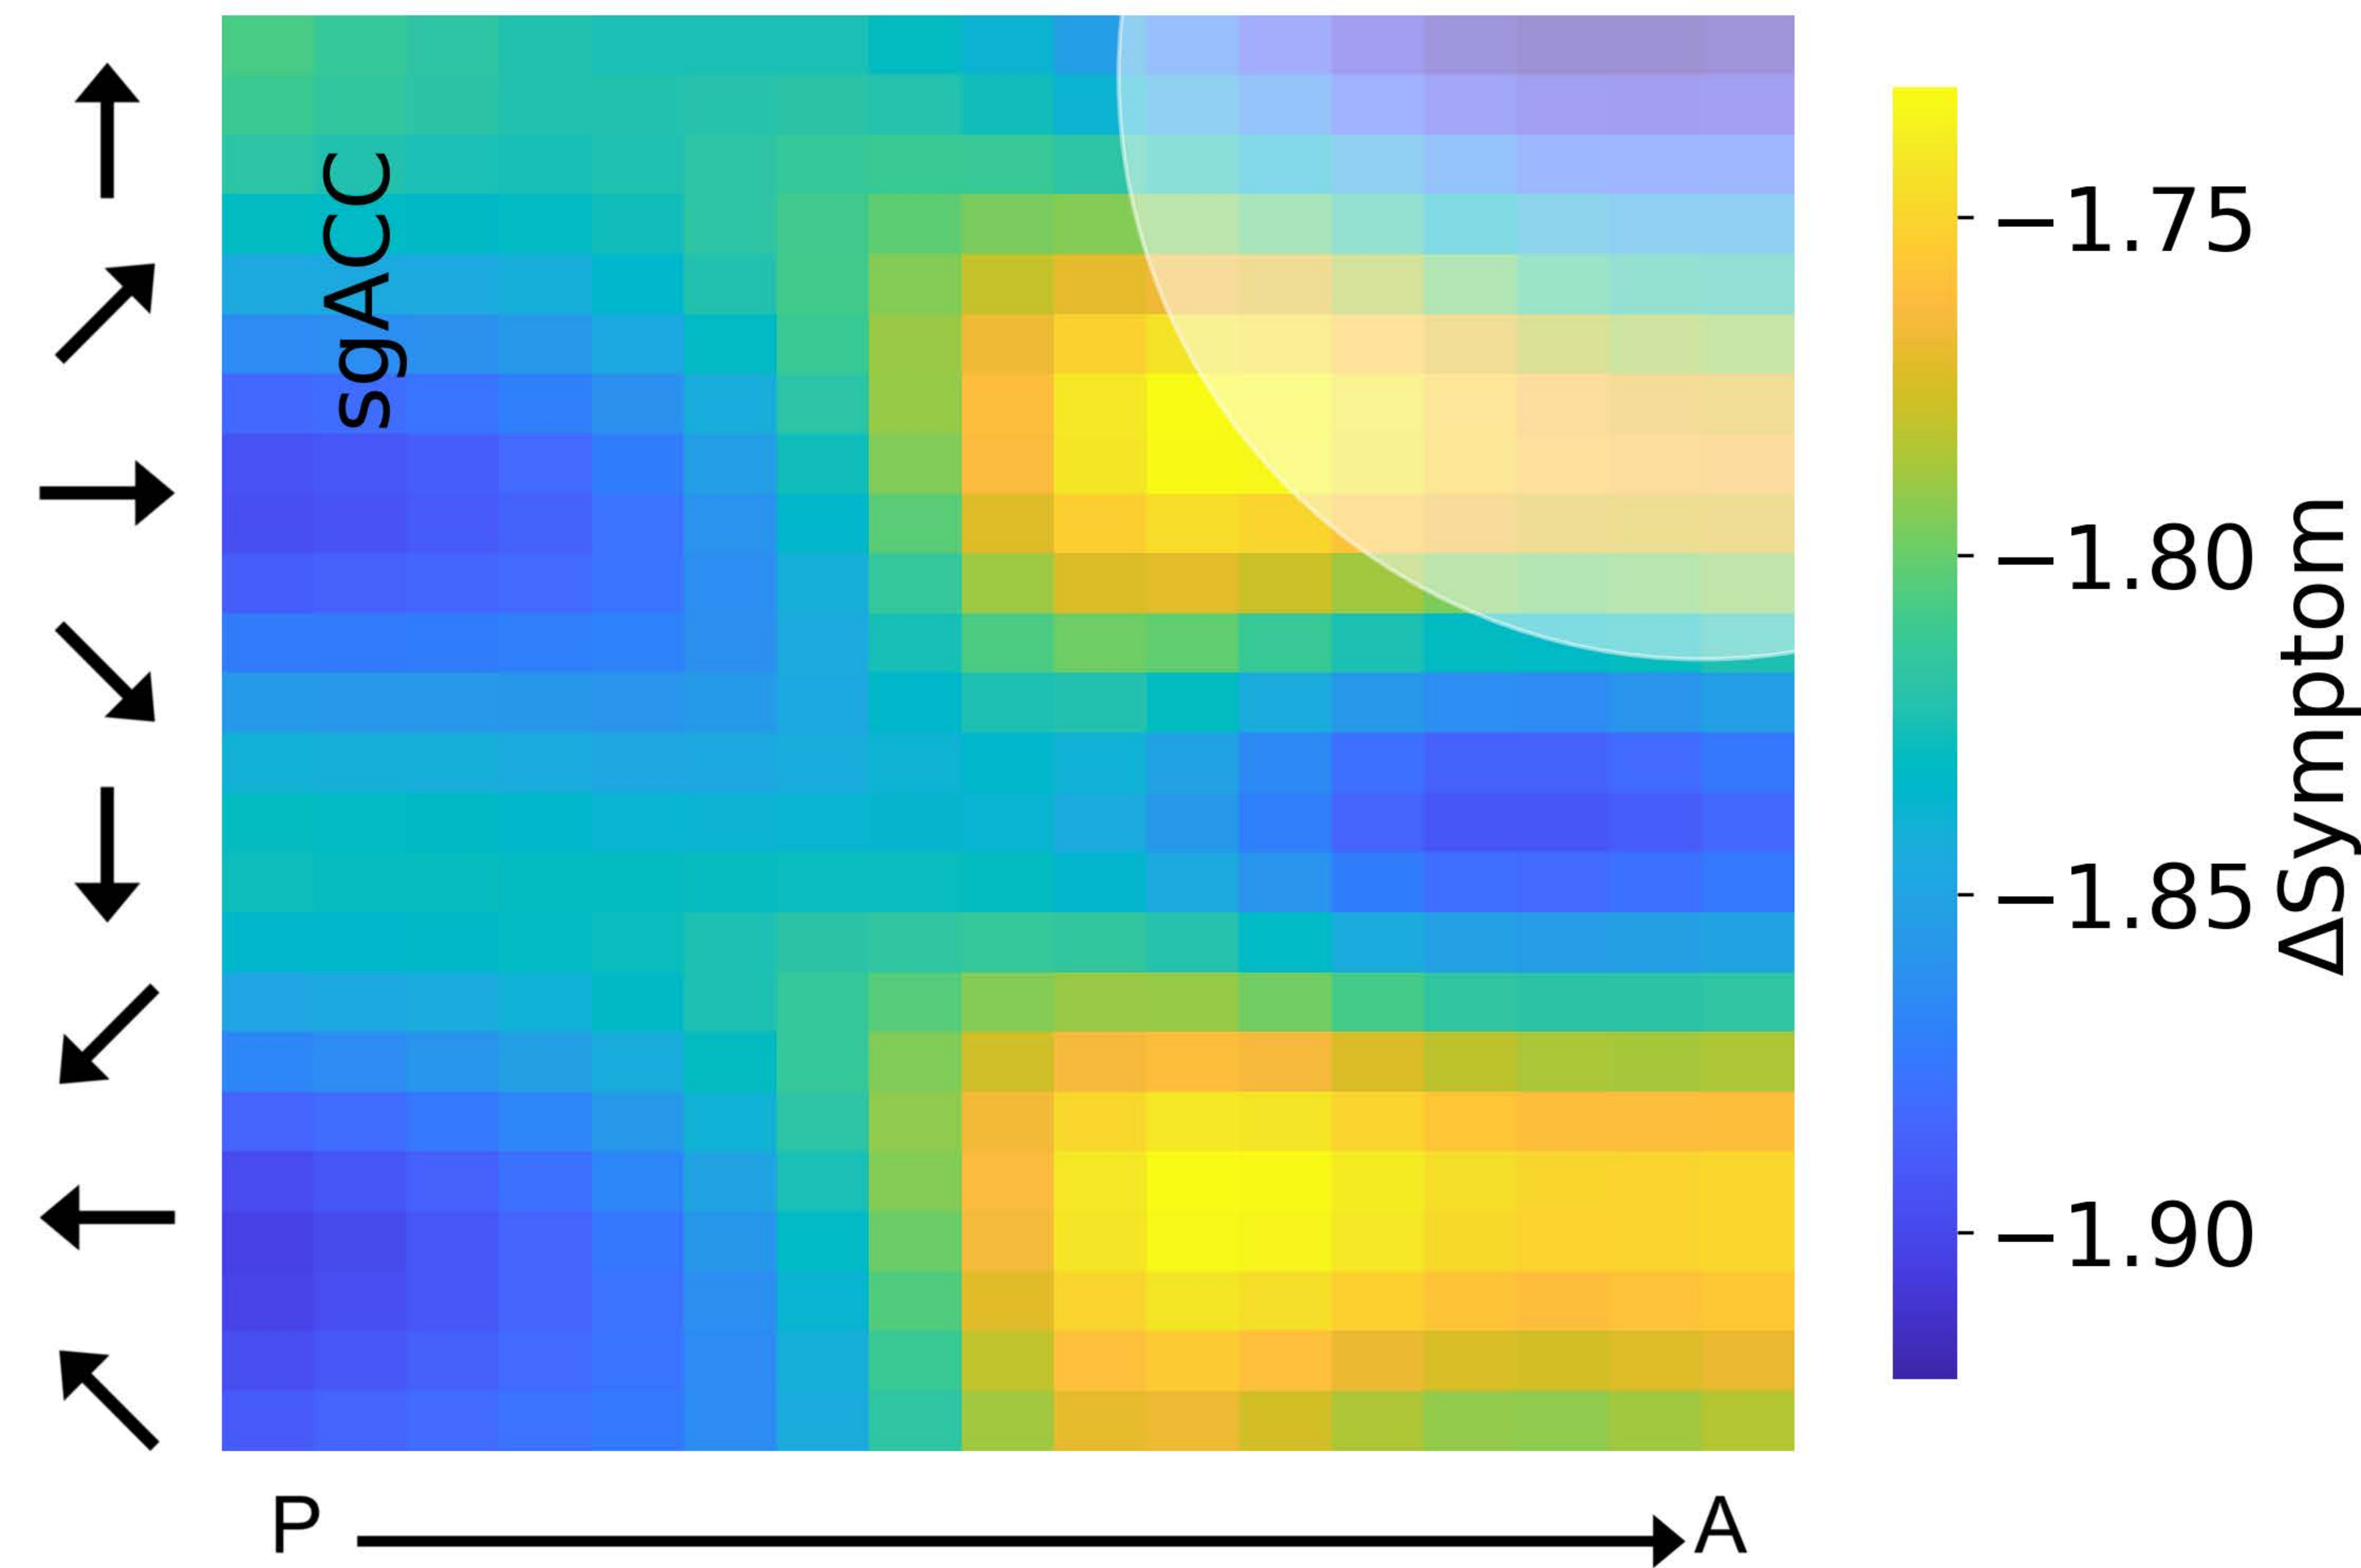



# NDARAC789HEZ\_hamd\_right\_dlpfc

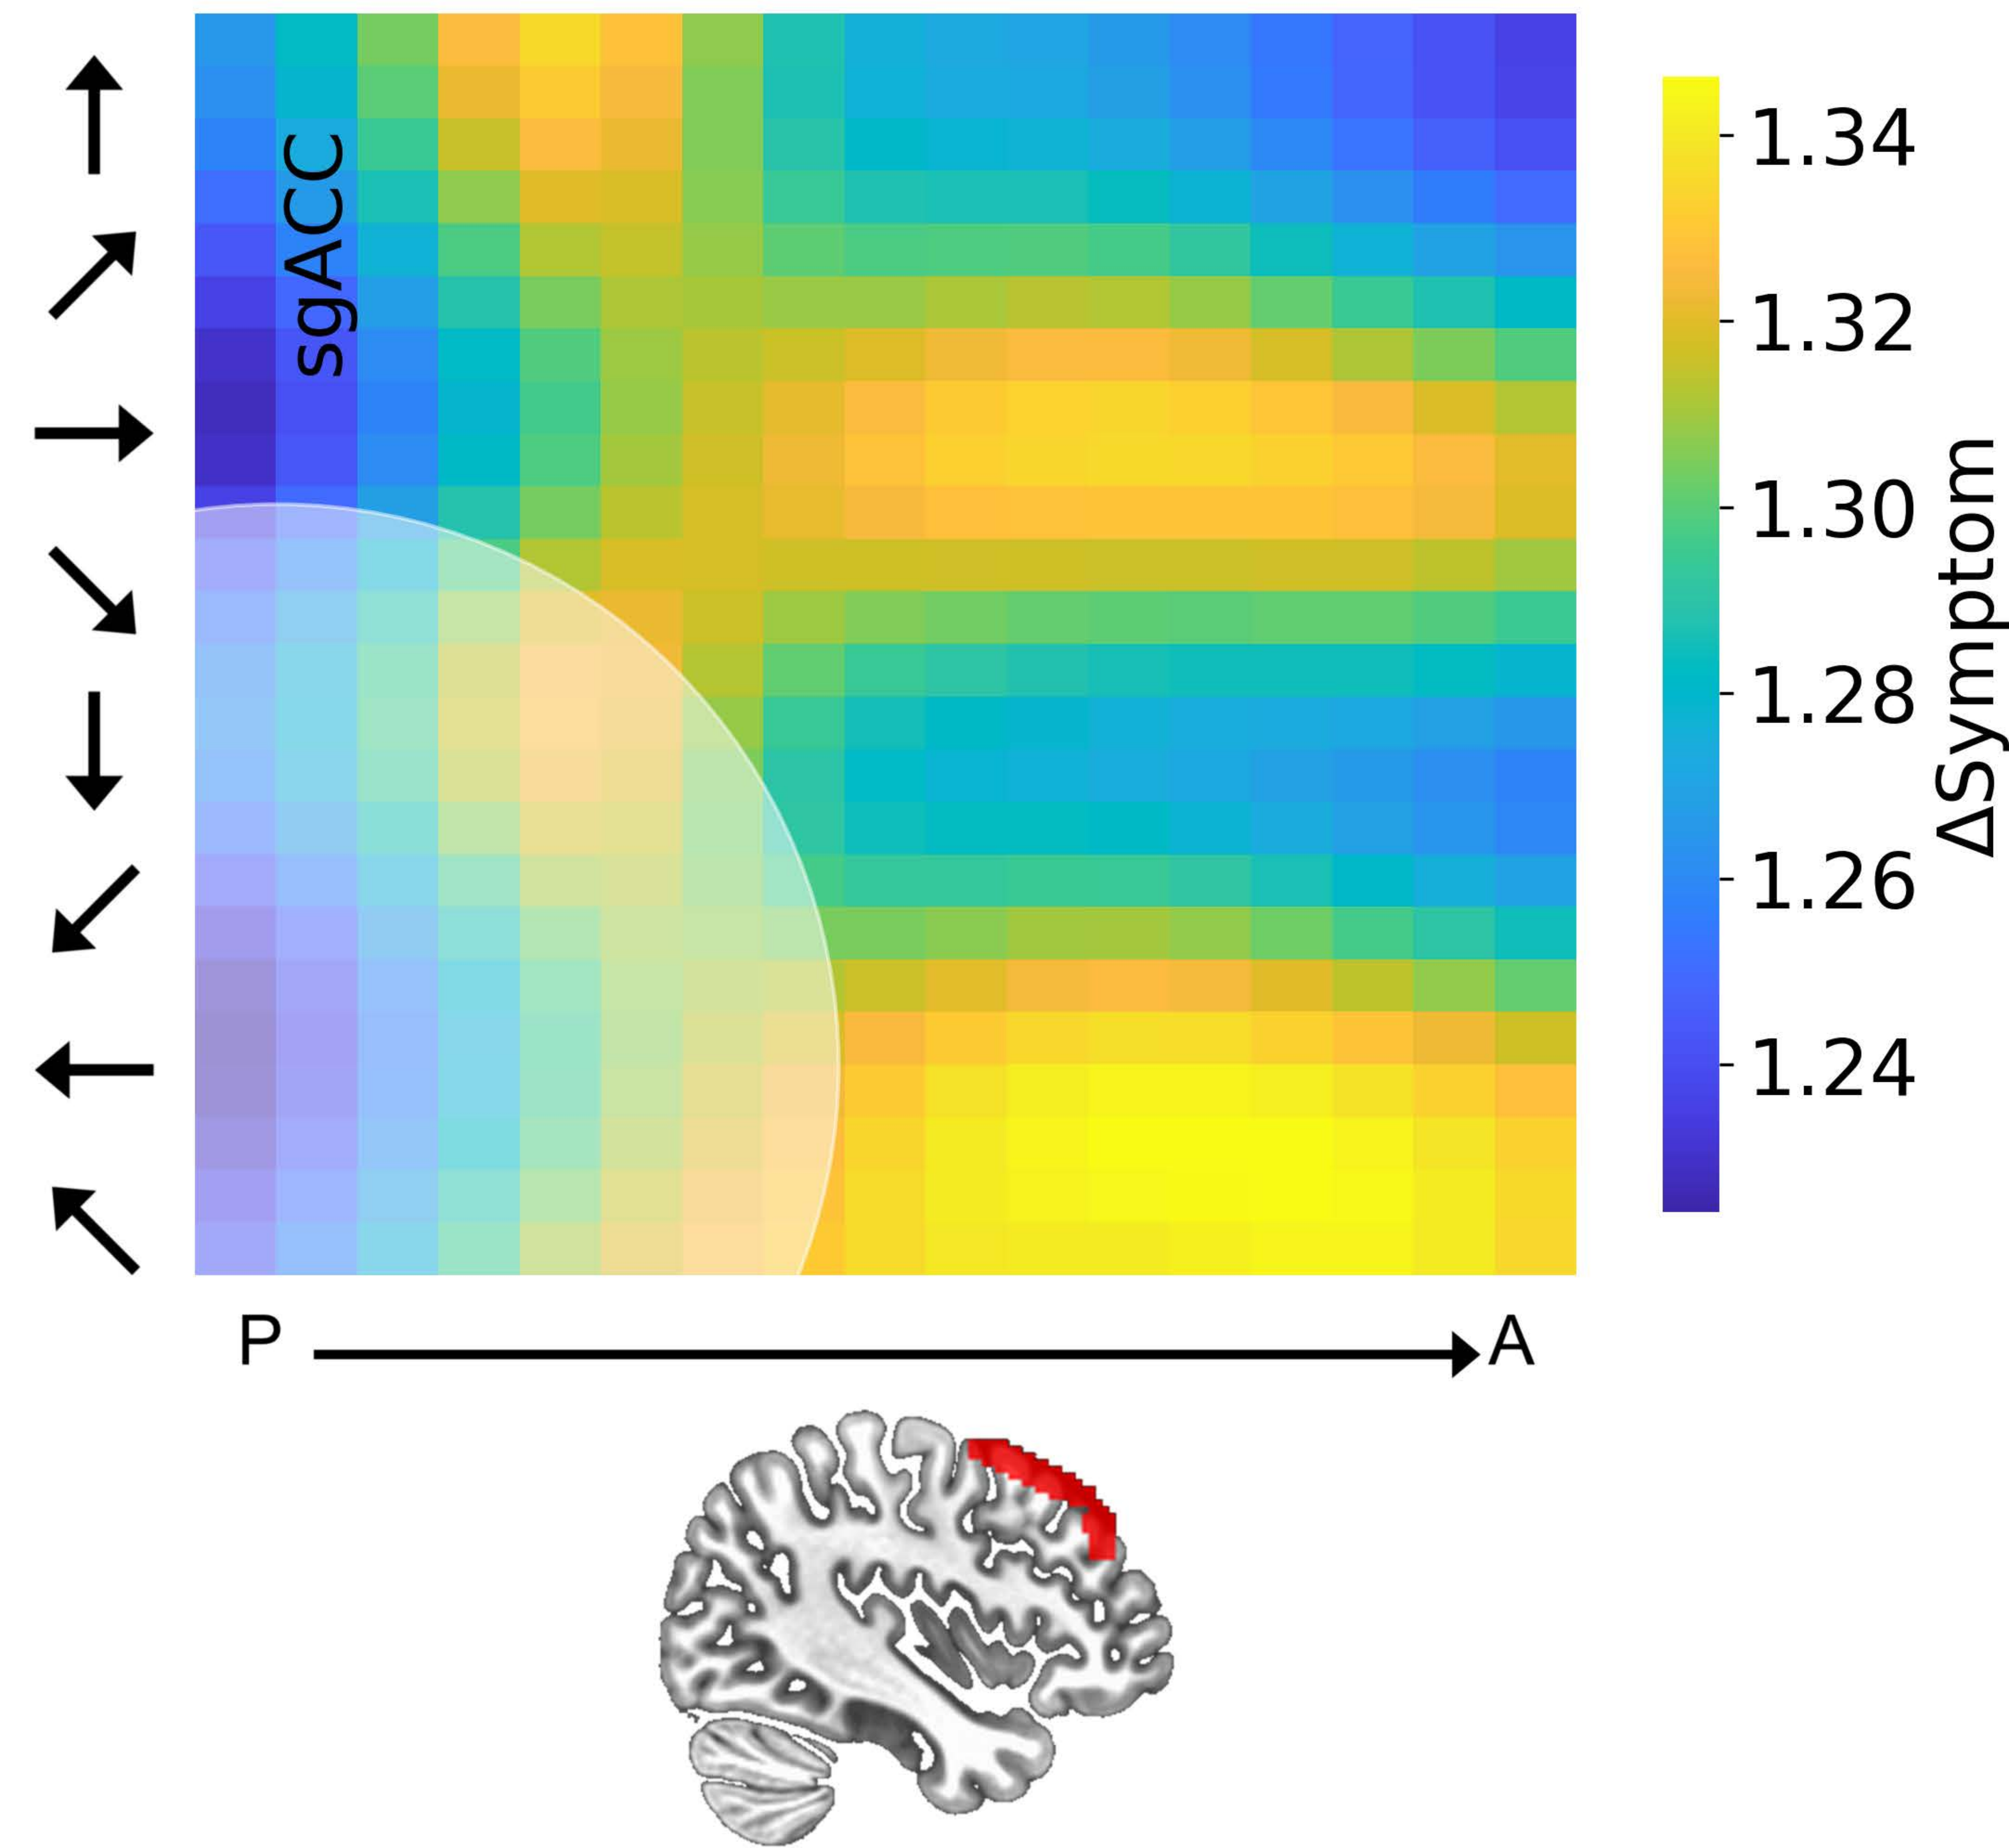



# INDARBD224PBF\_hamd\_right\_dlpfc

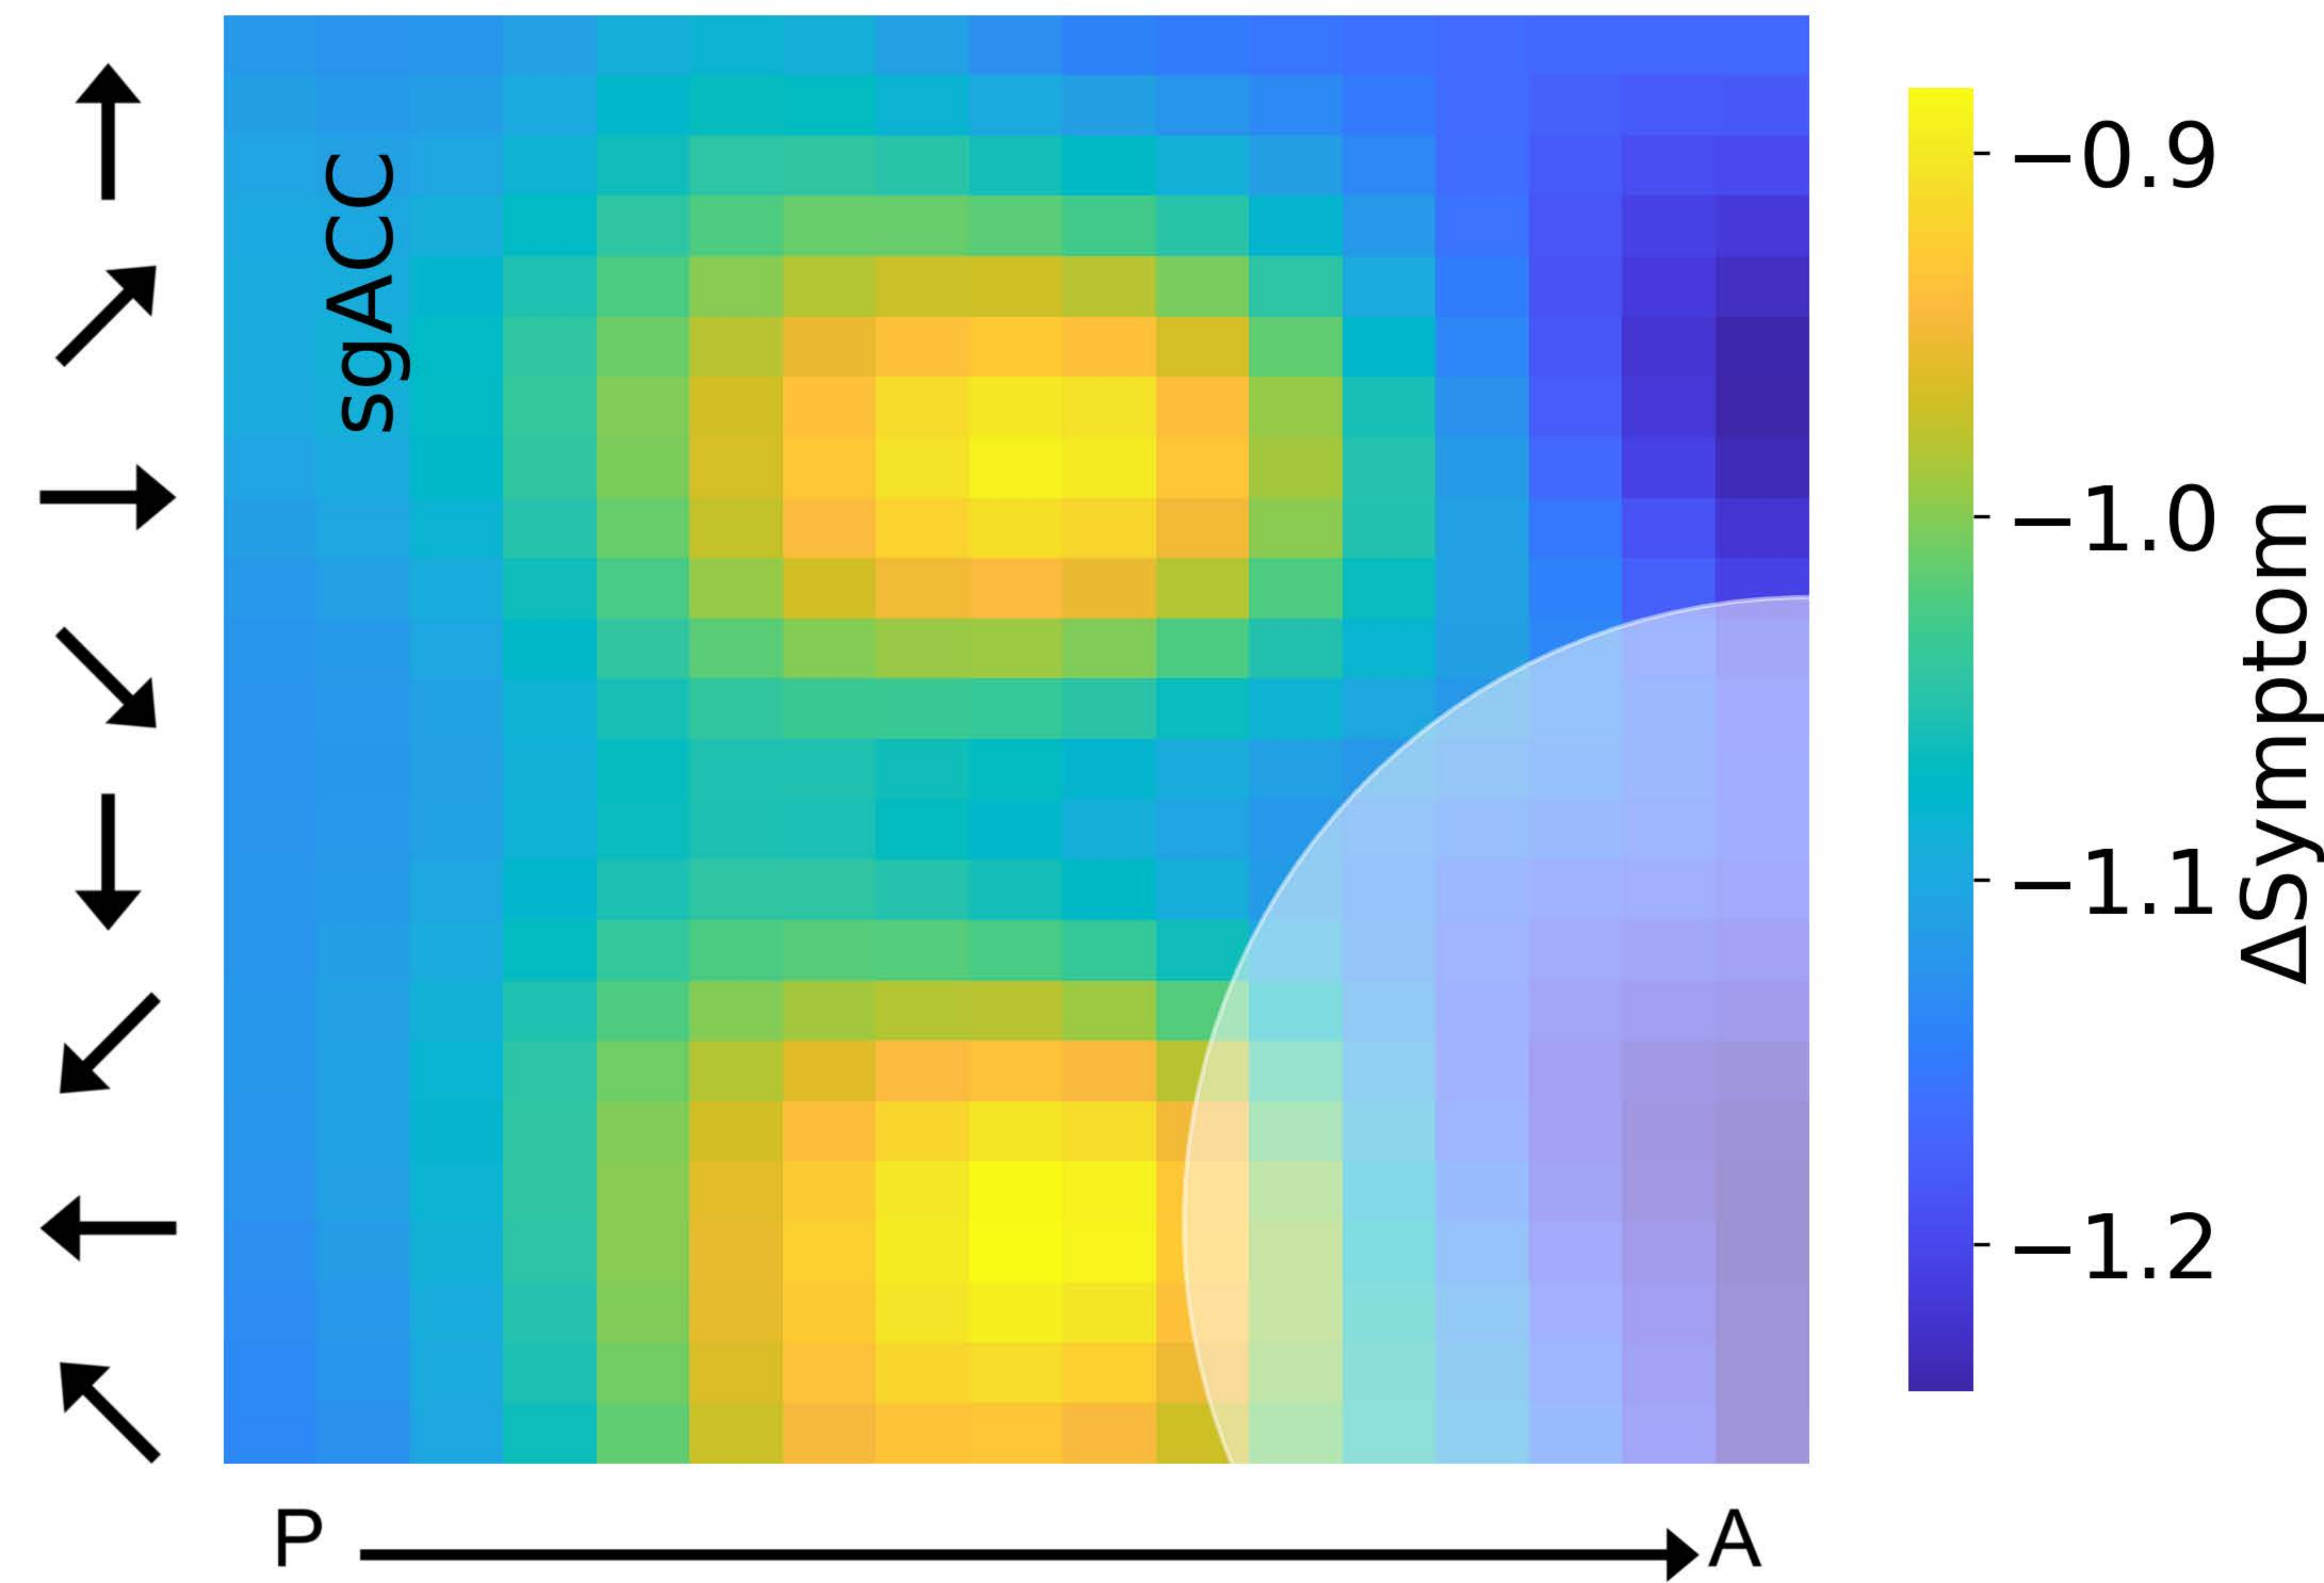



# NDARBF292NPE\_hamd\_right\_dlpfc

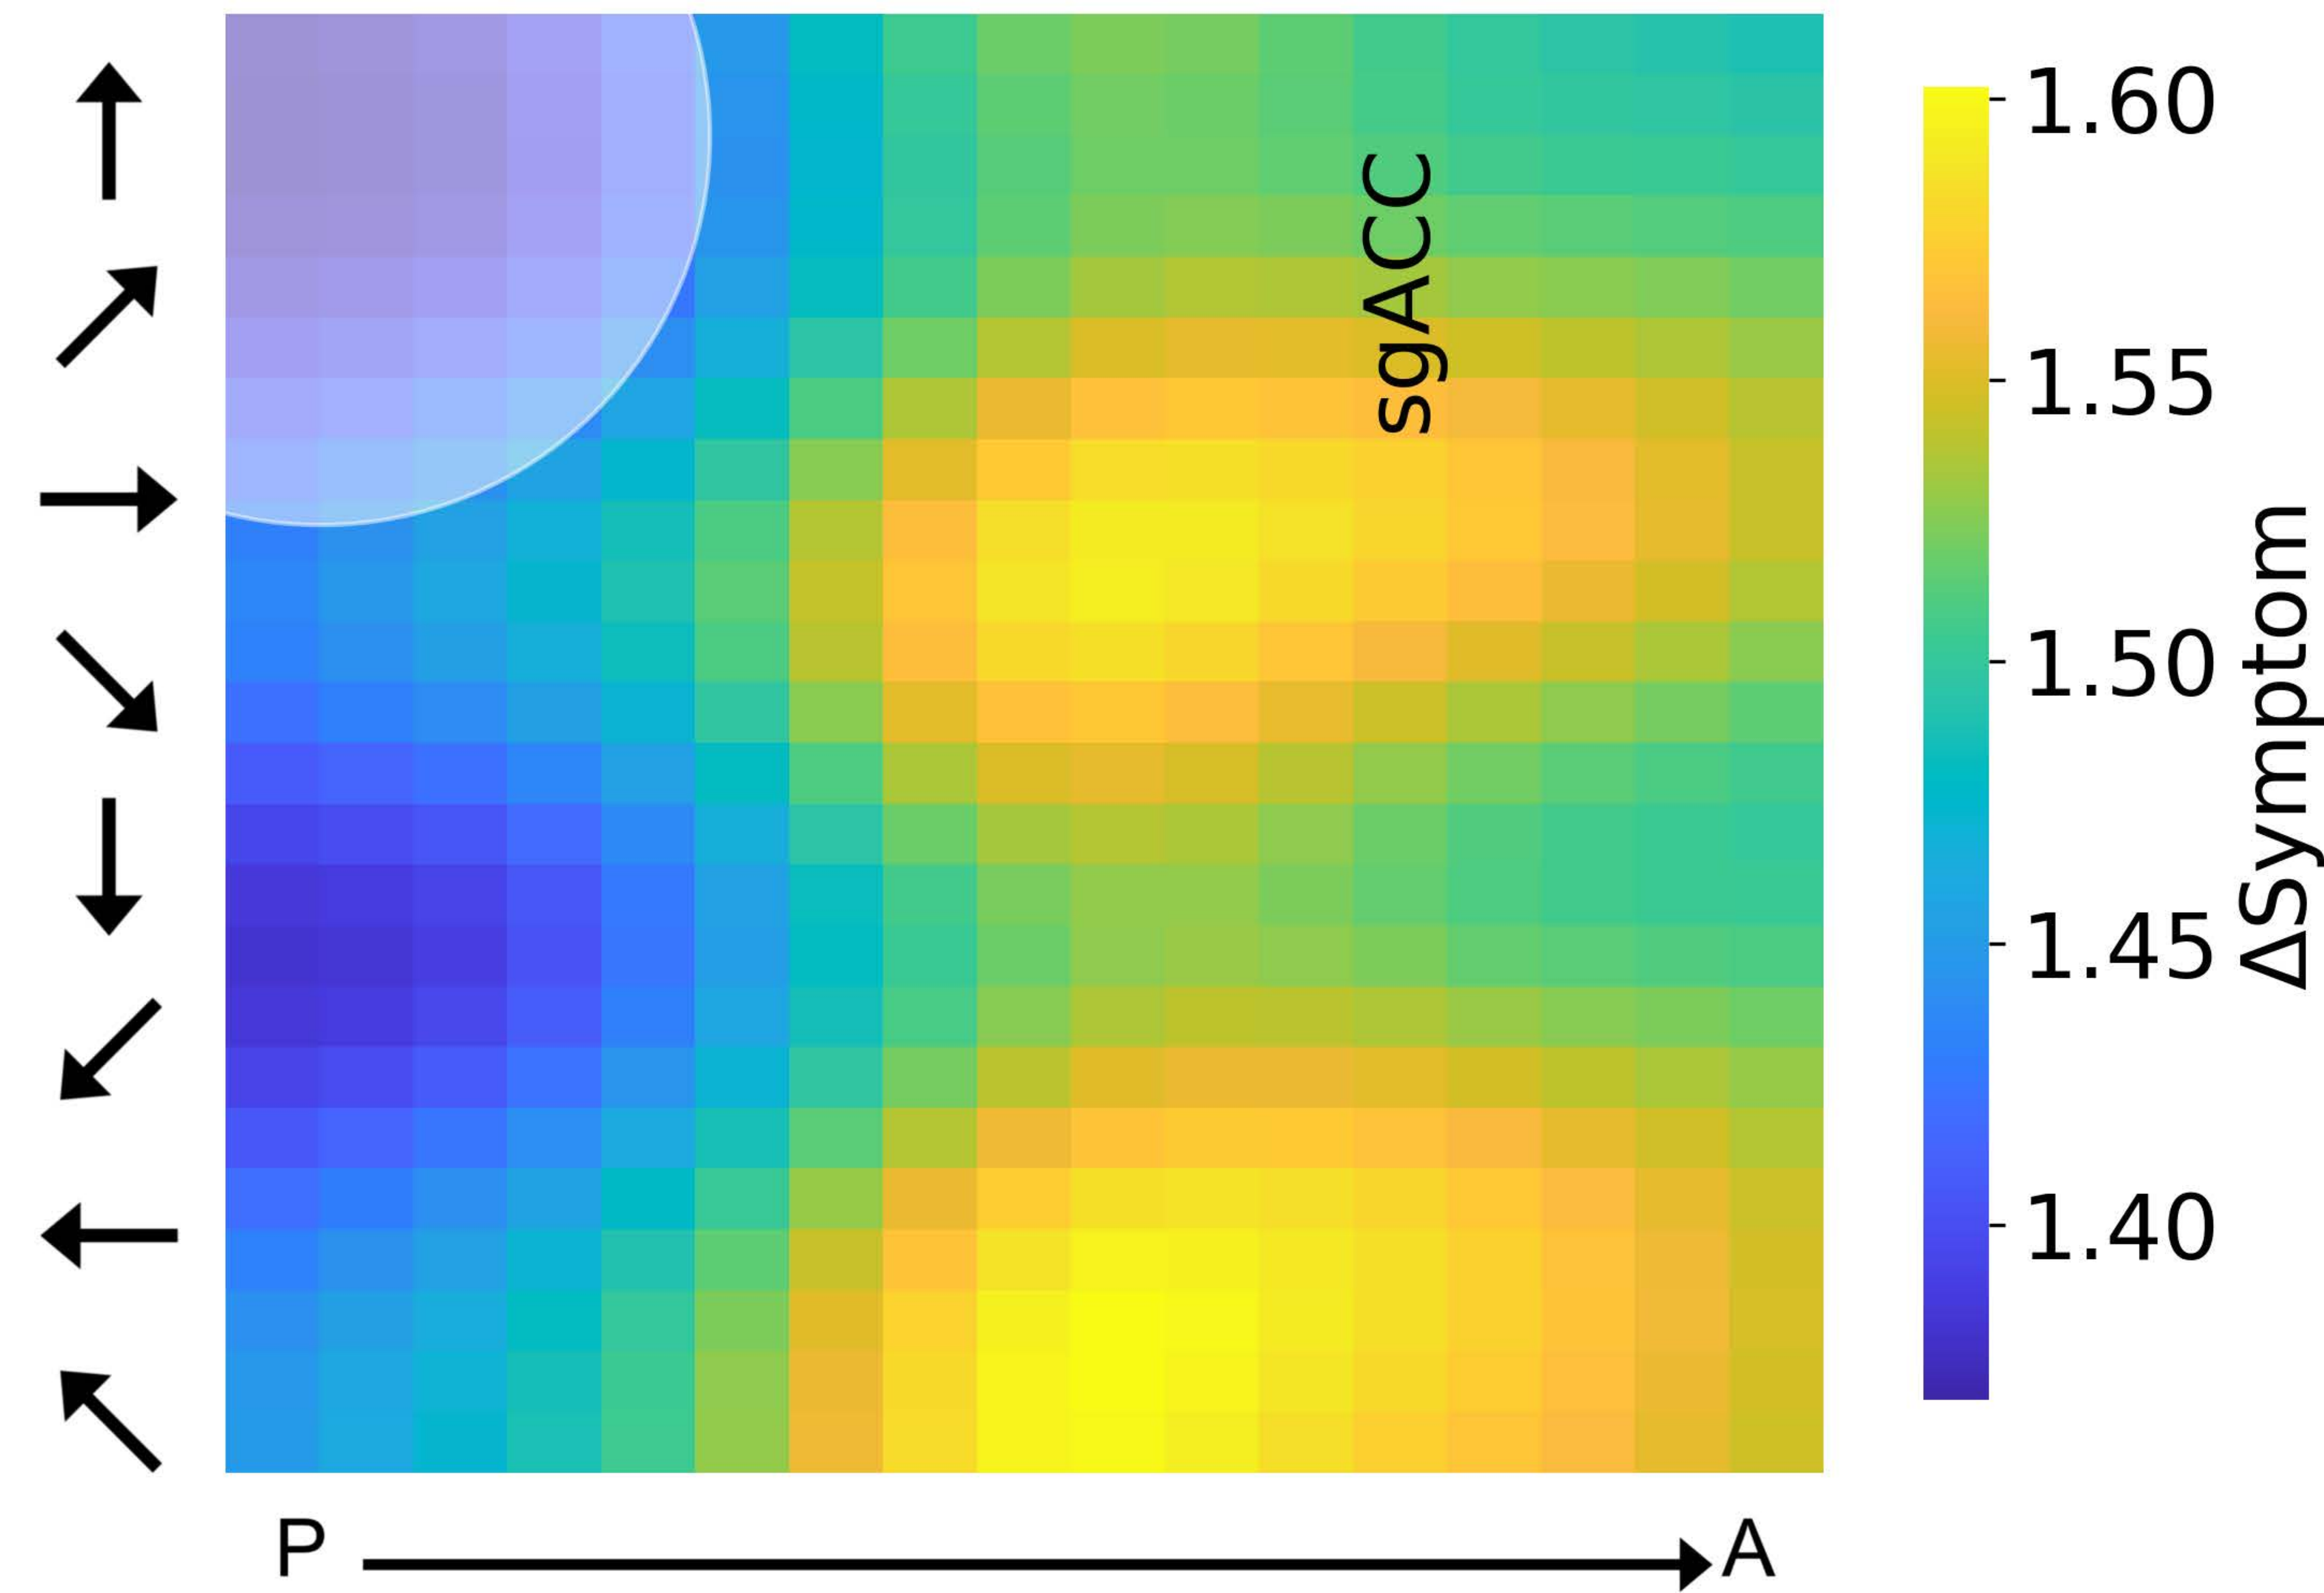



# INDARCG535CPC\_hamd\_right\_dlpfc

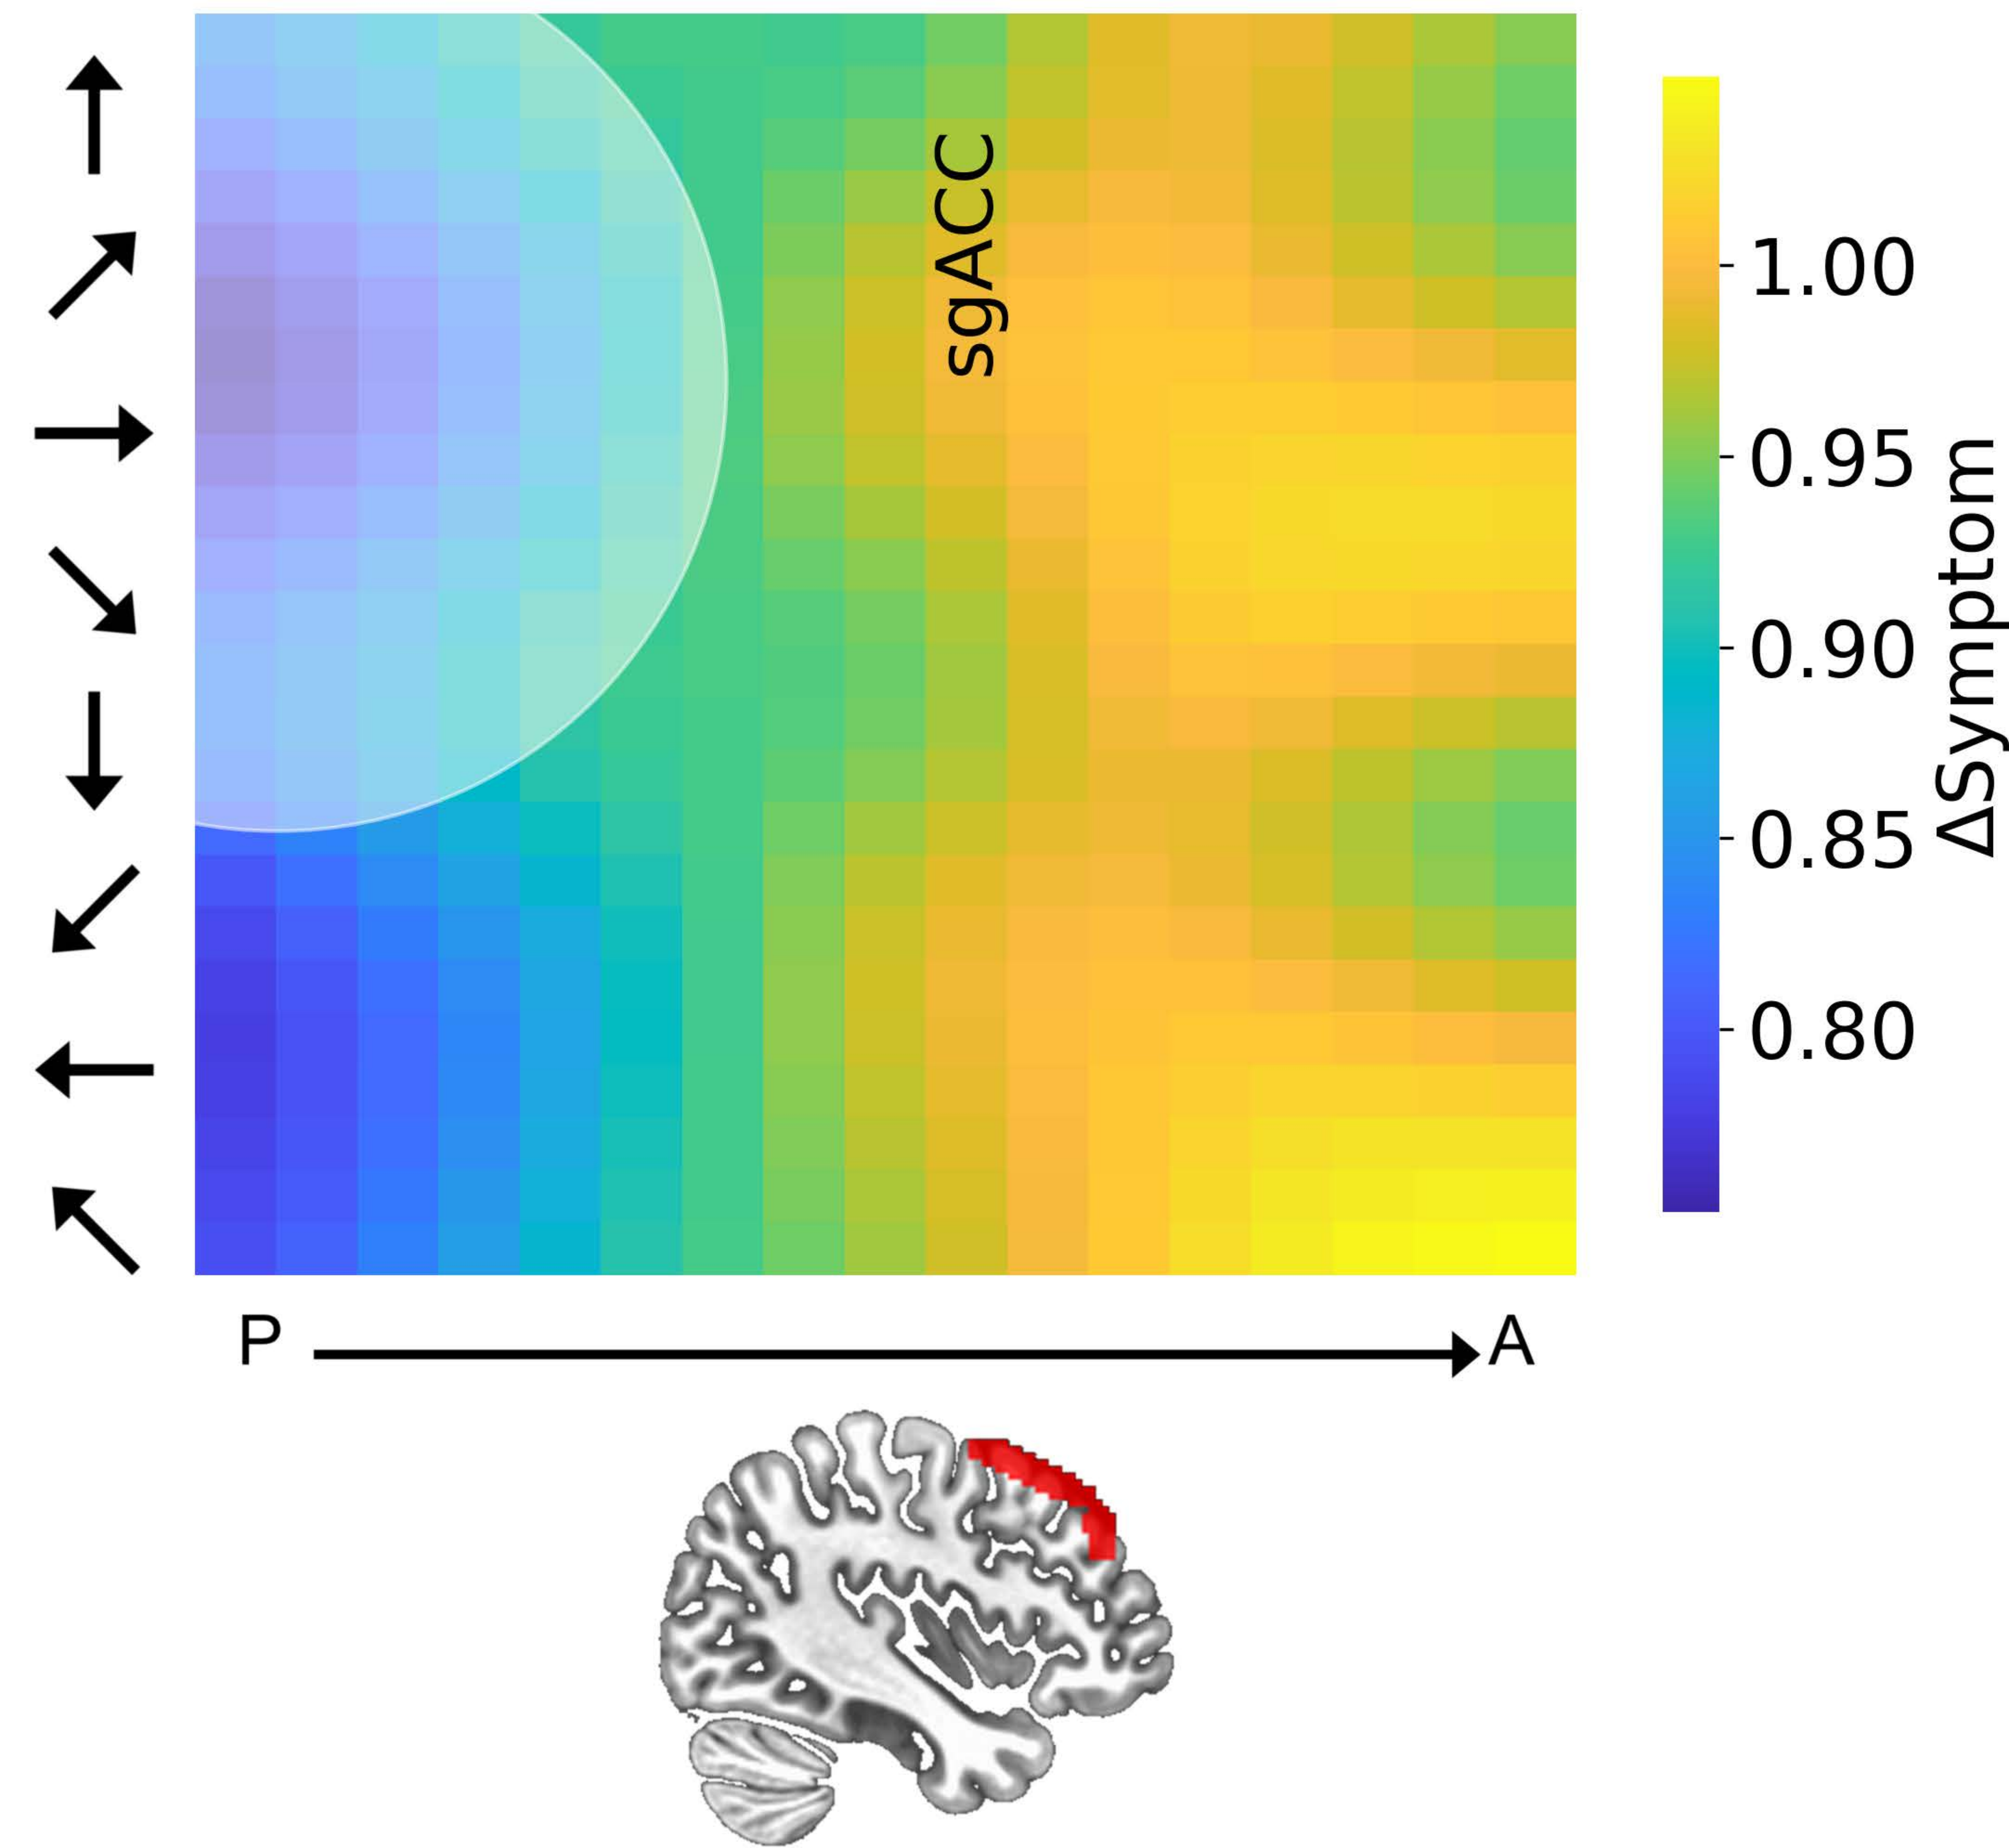



# INDARC406TU1\_hamd\_right\_dlpfc

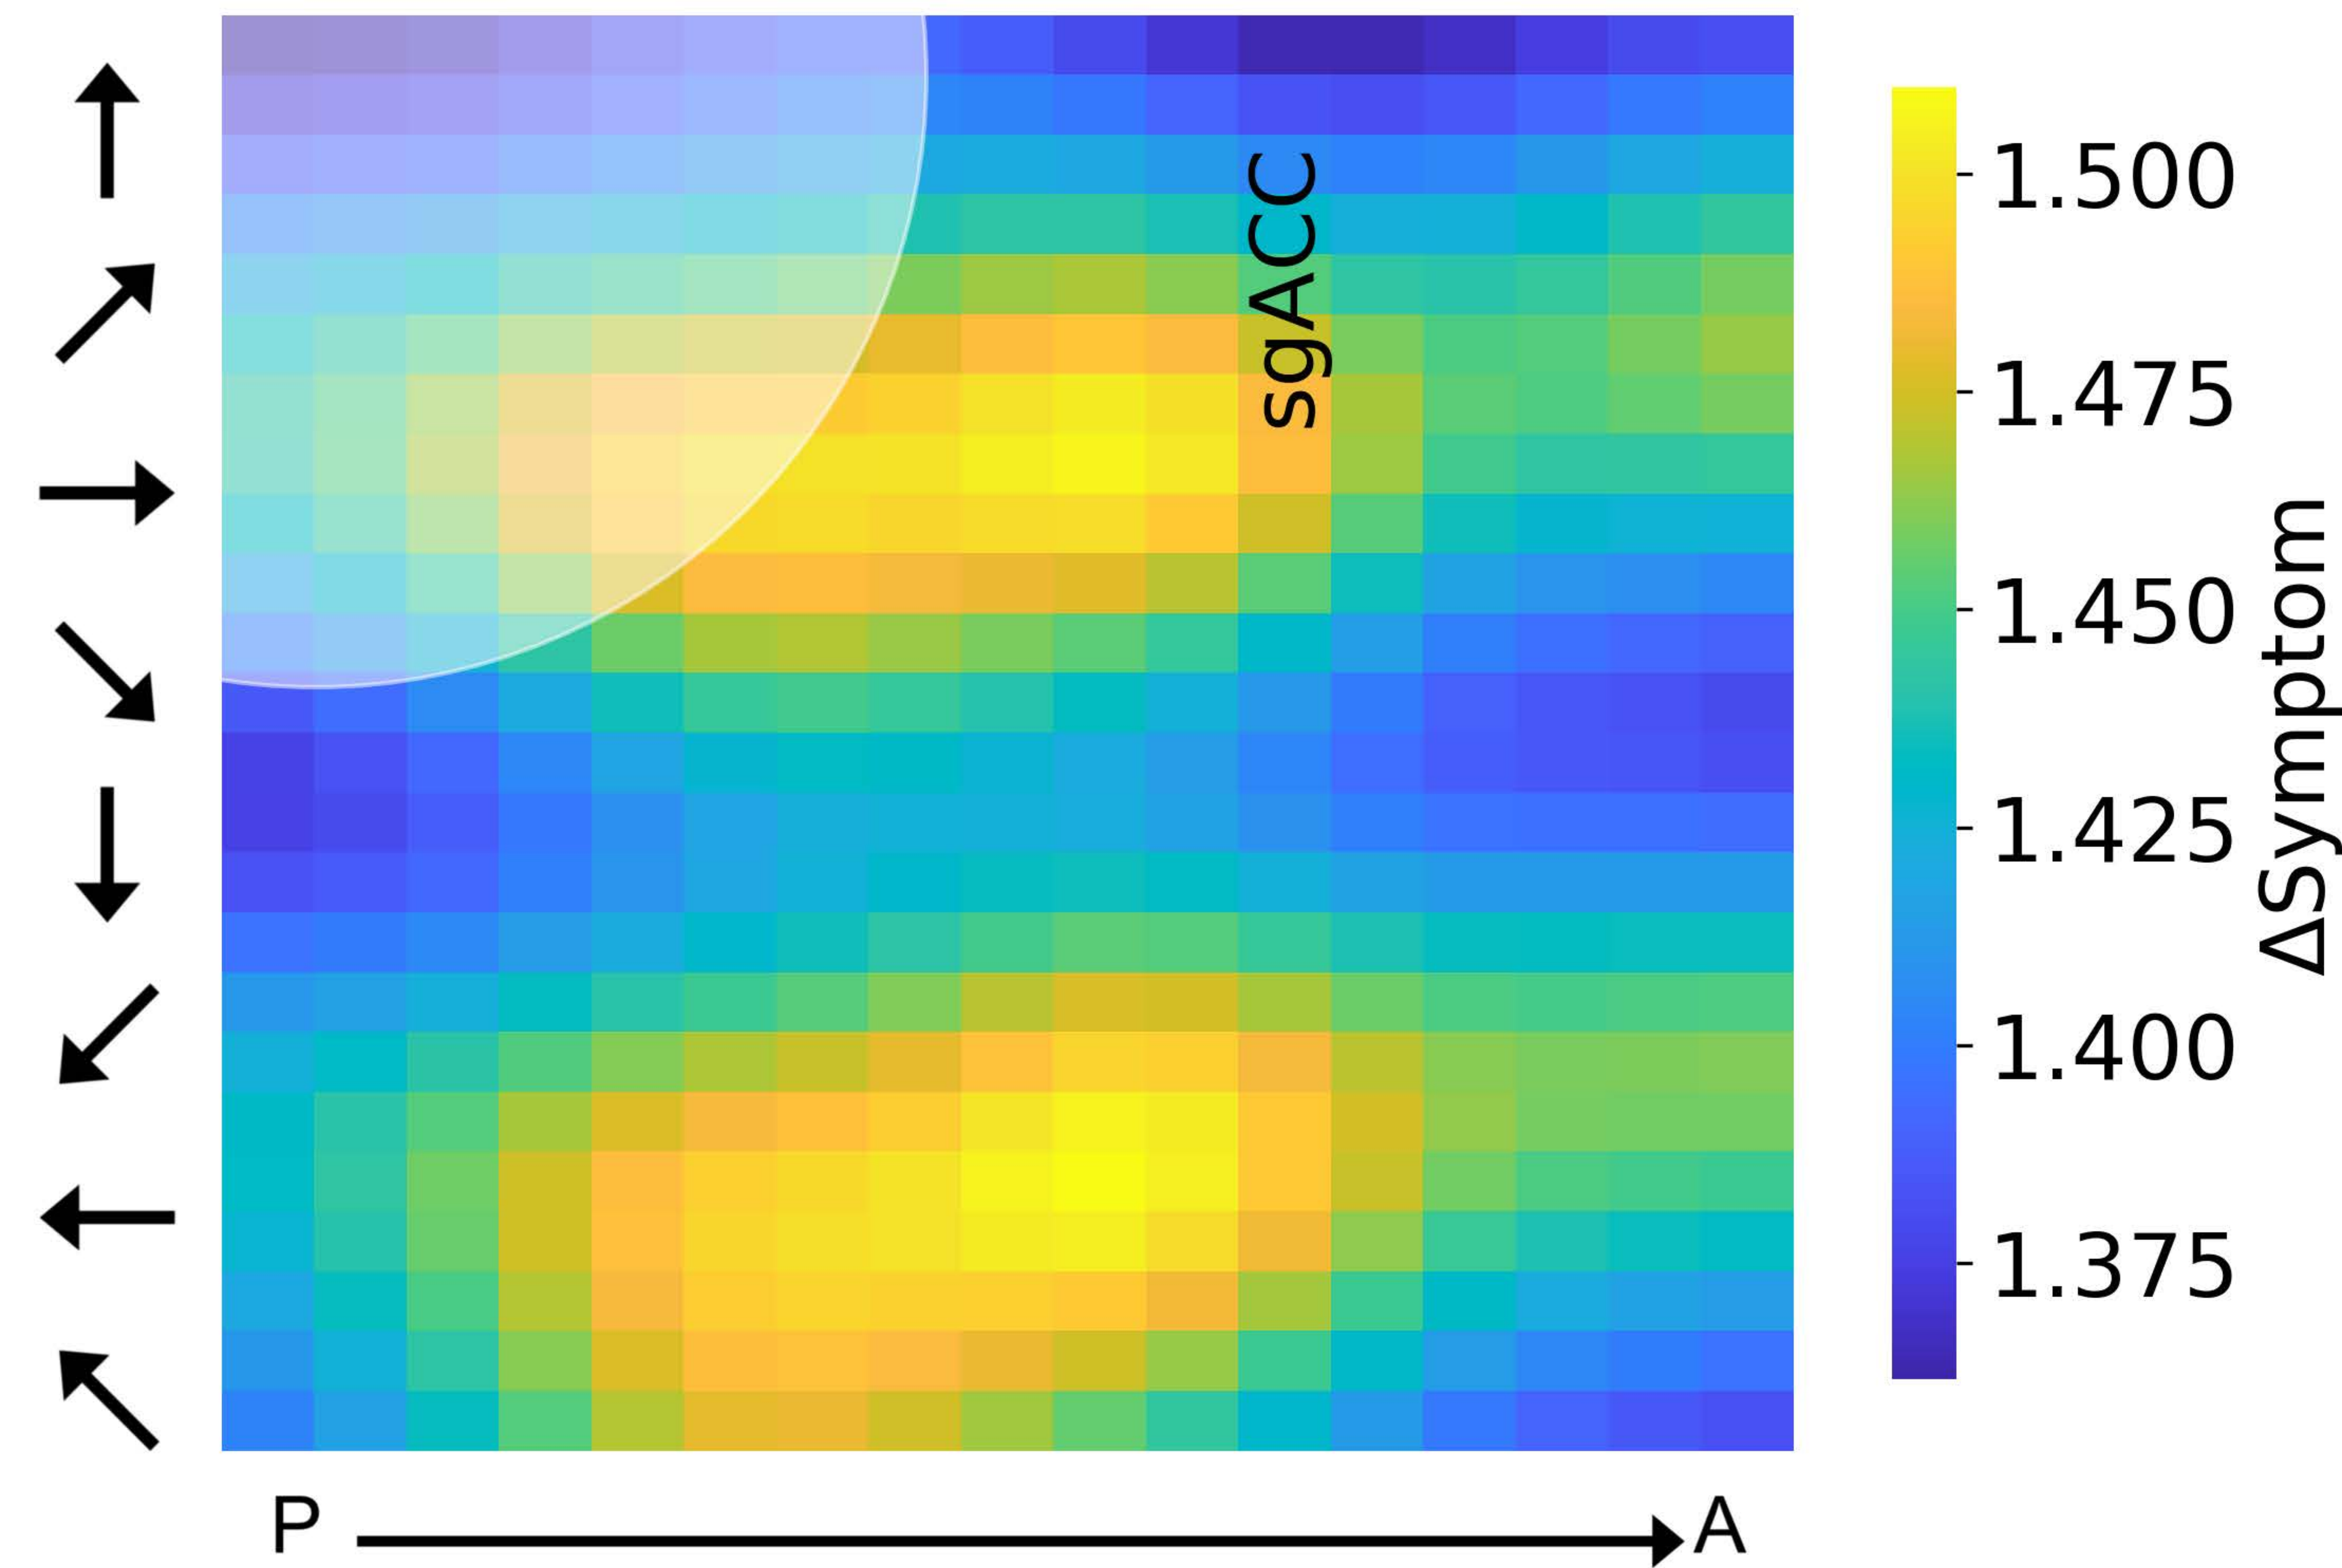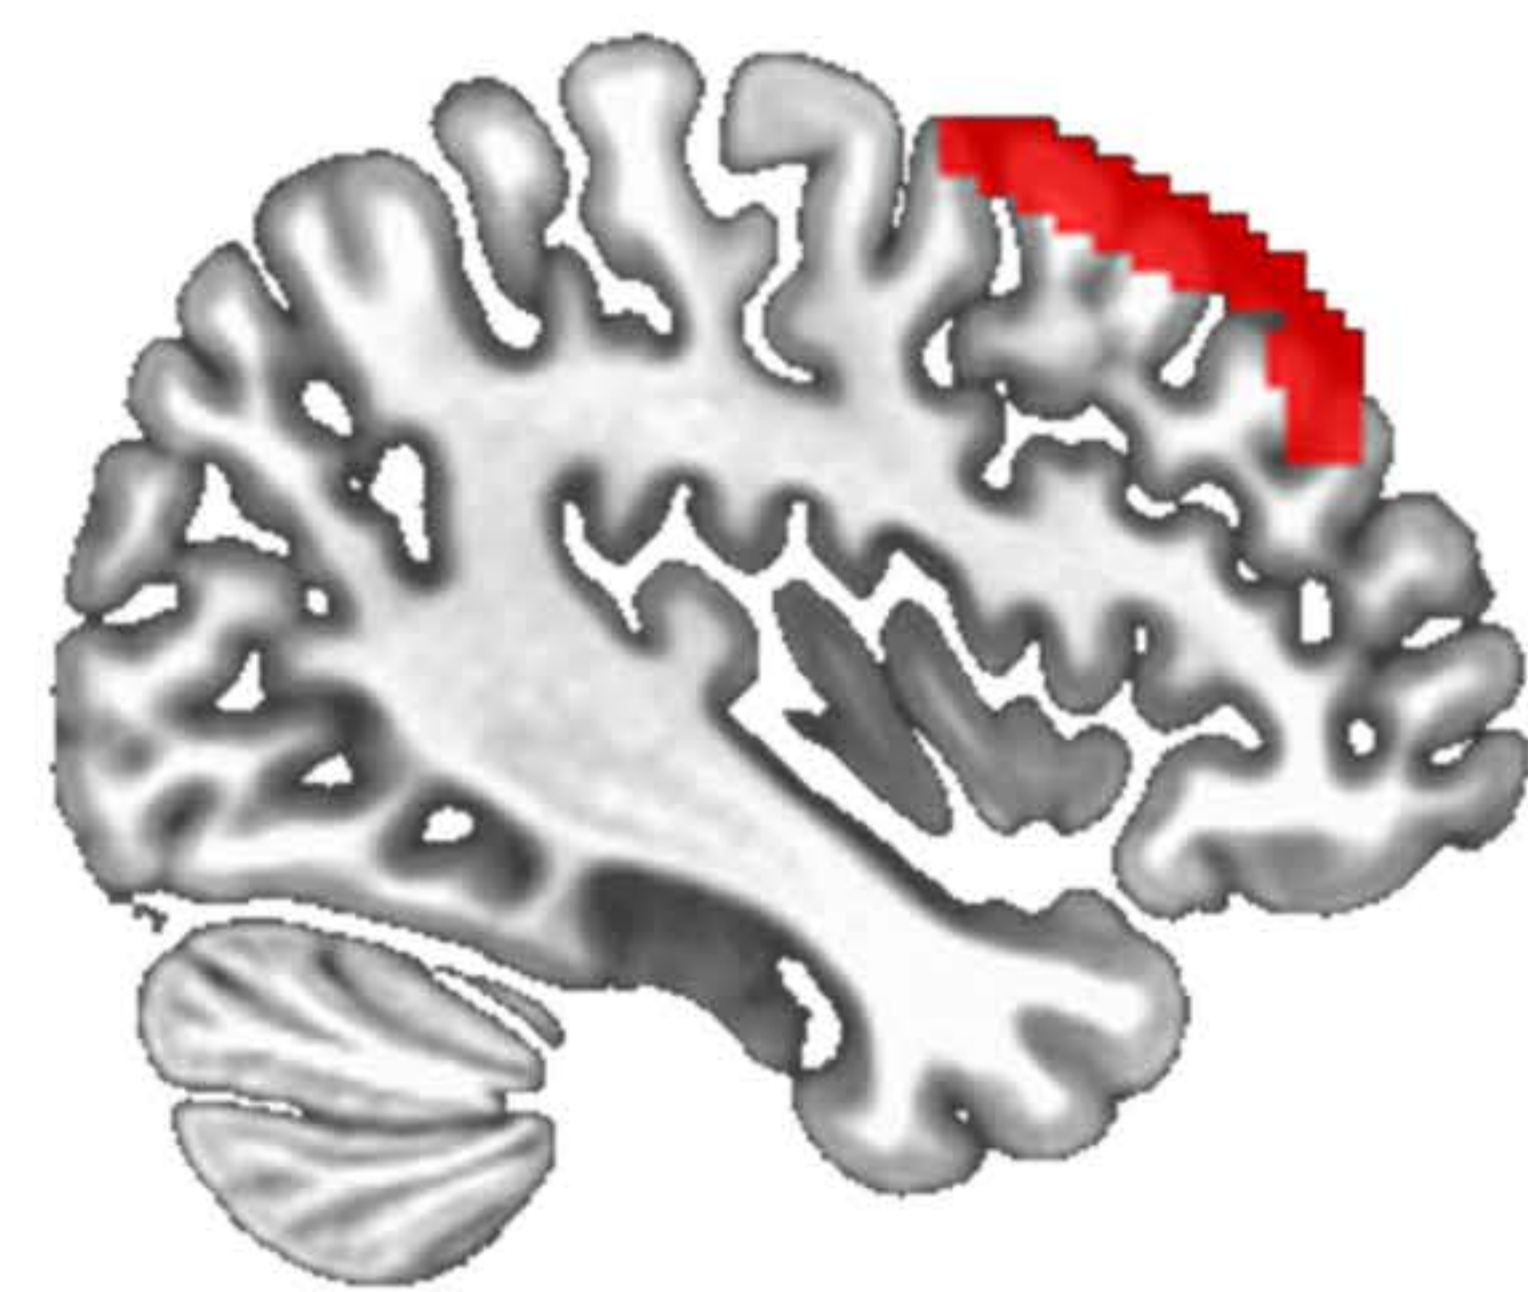



# INDARDY771TXZ\_hamd\_right\_dlpfc

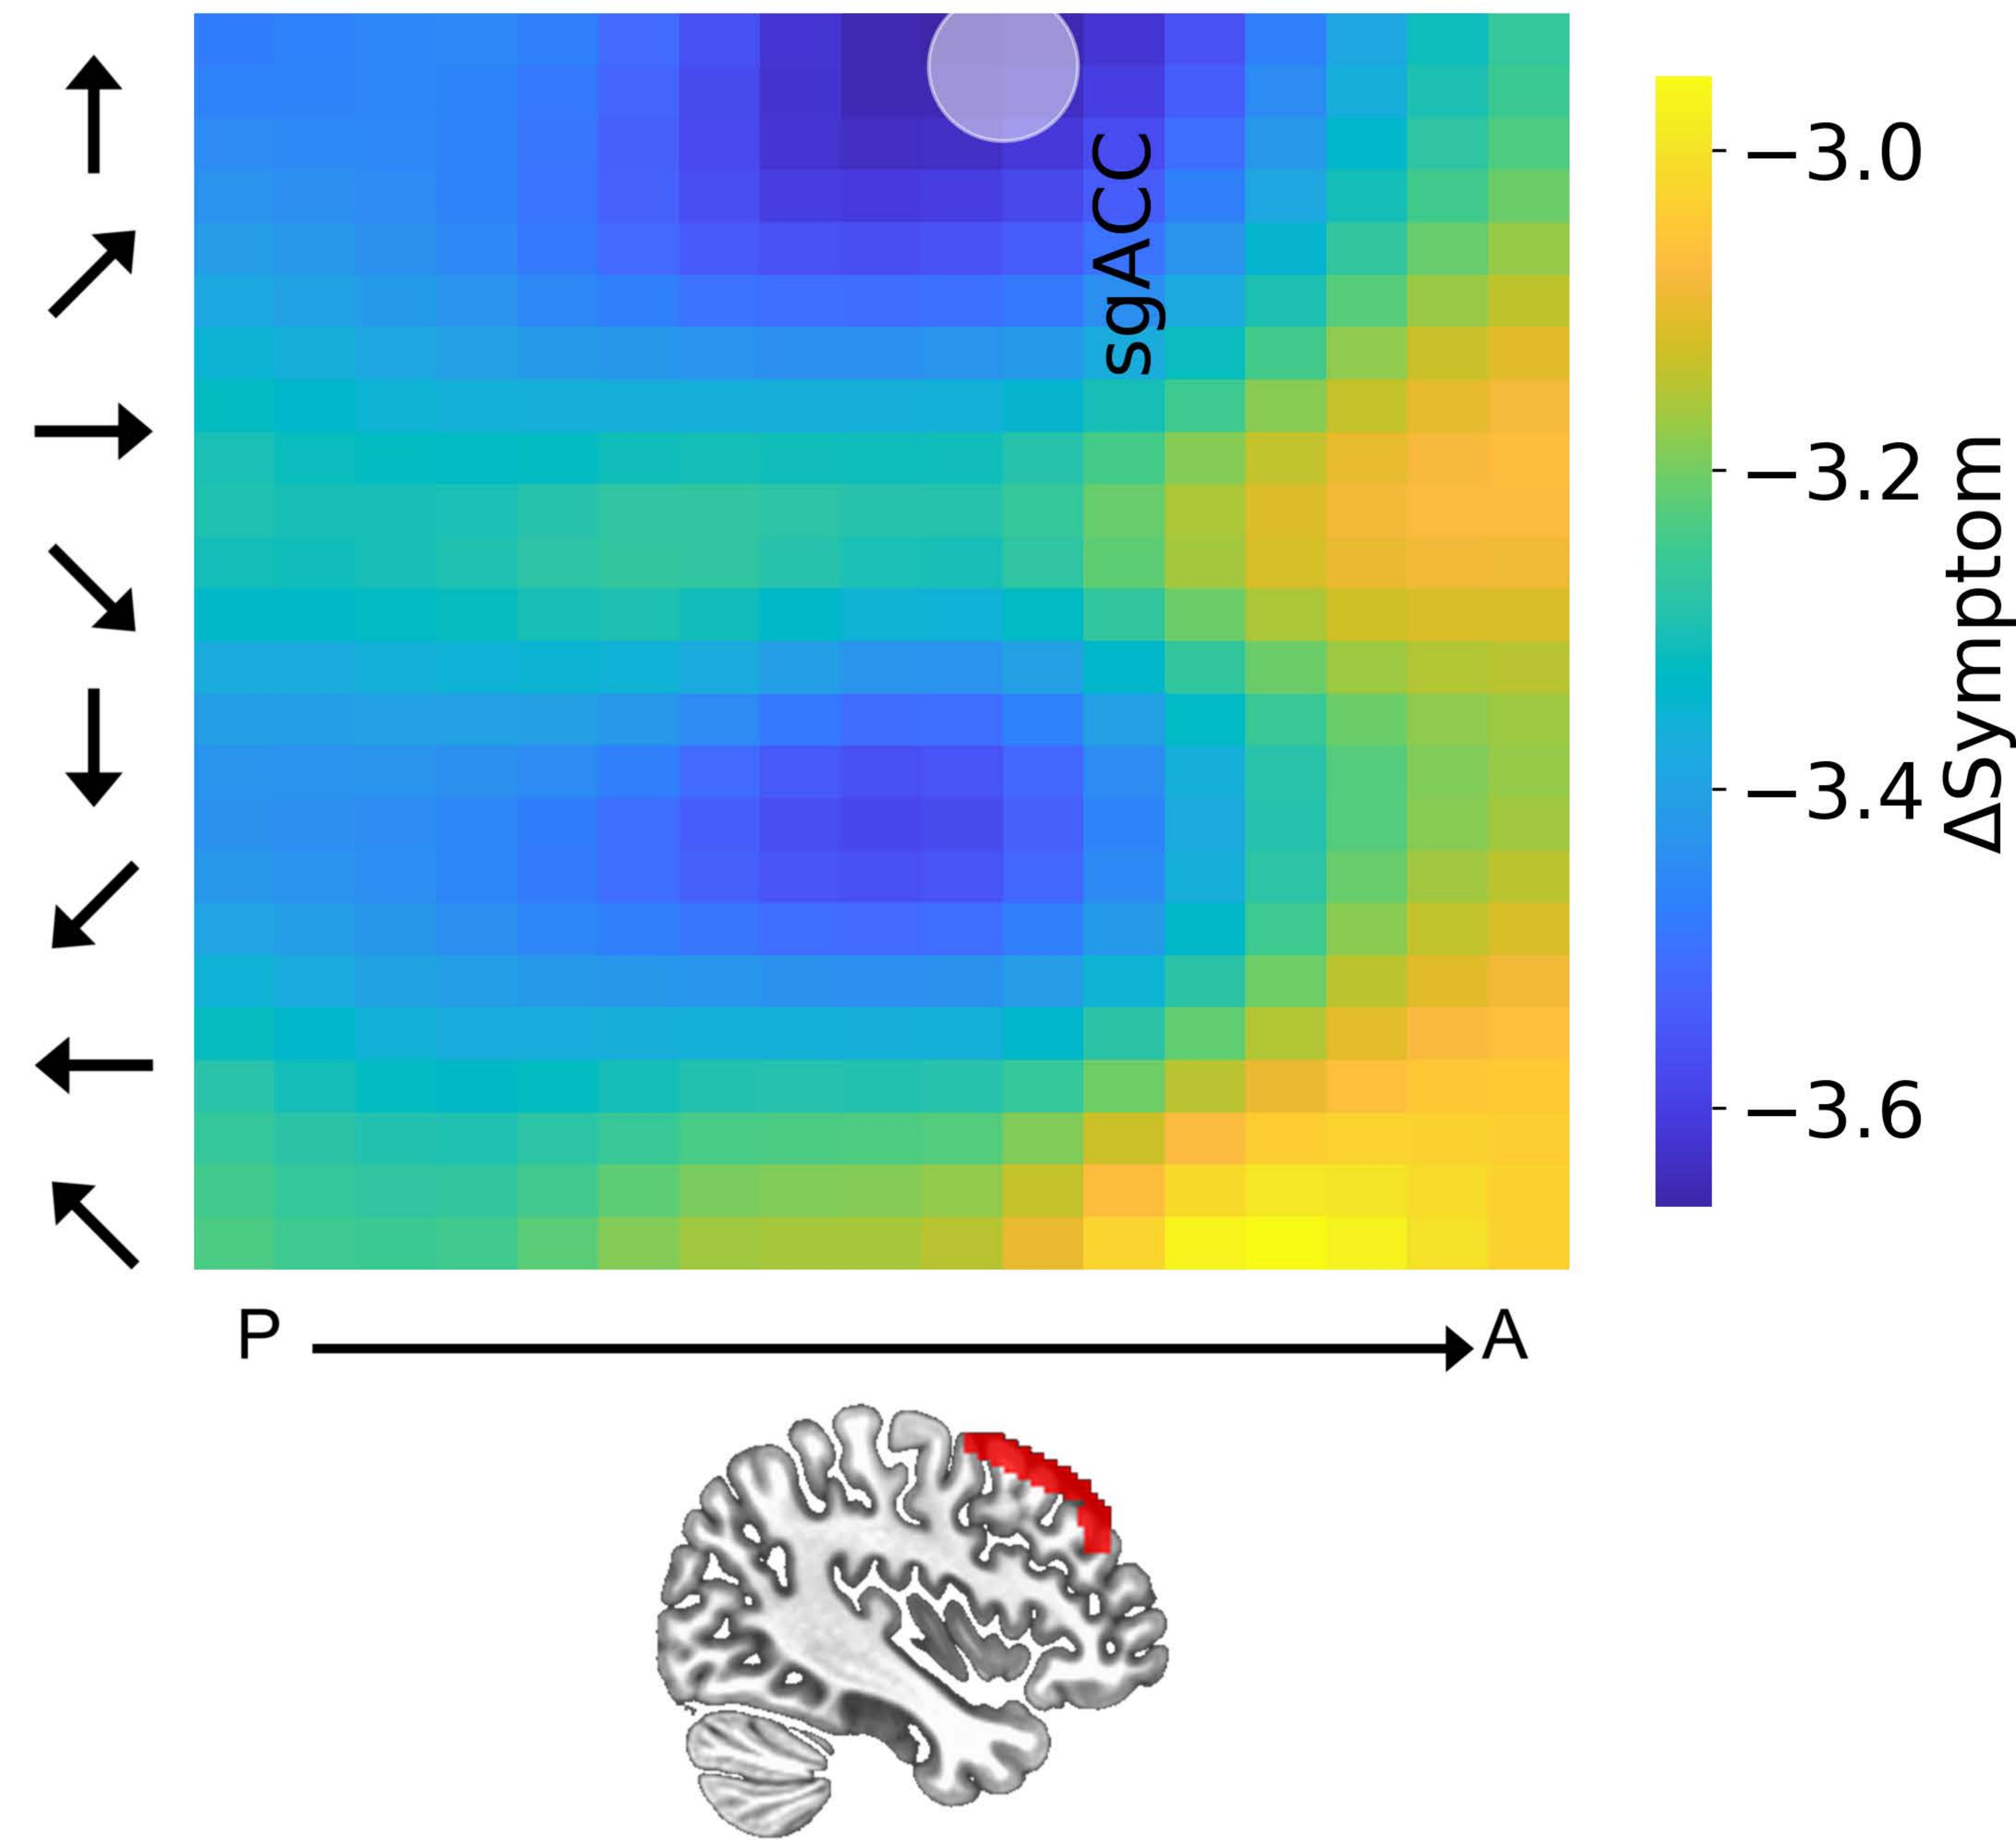



# NDAREU790BVQ\_hamd\_right\_dlpfc

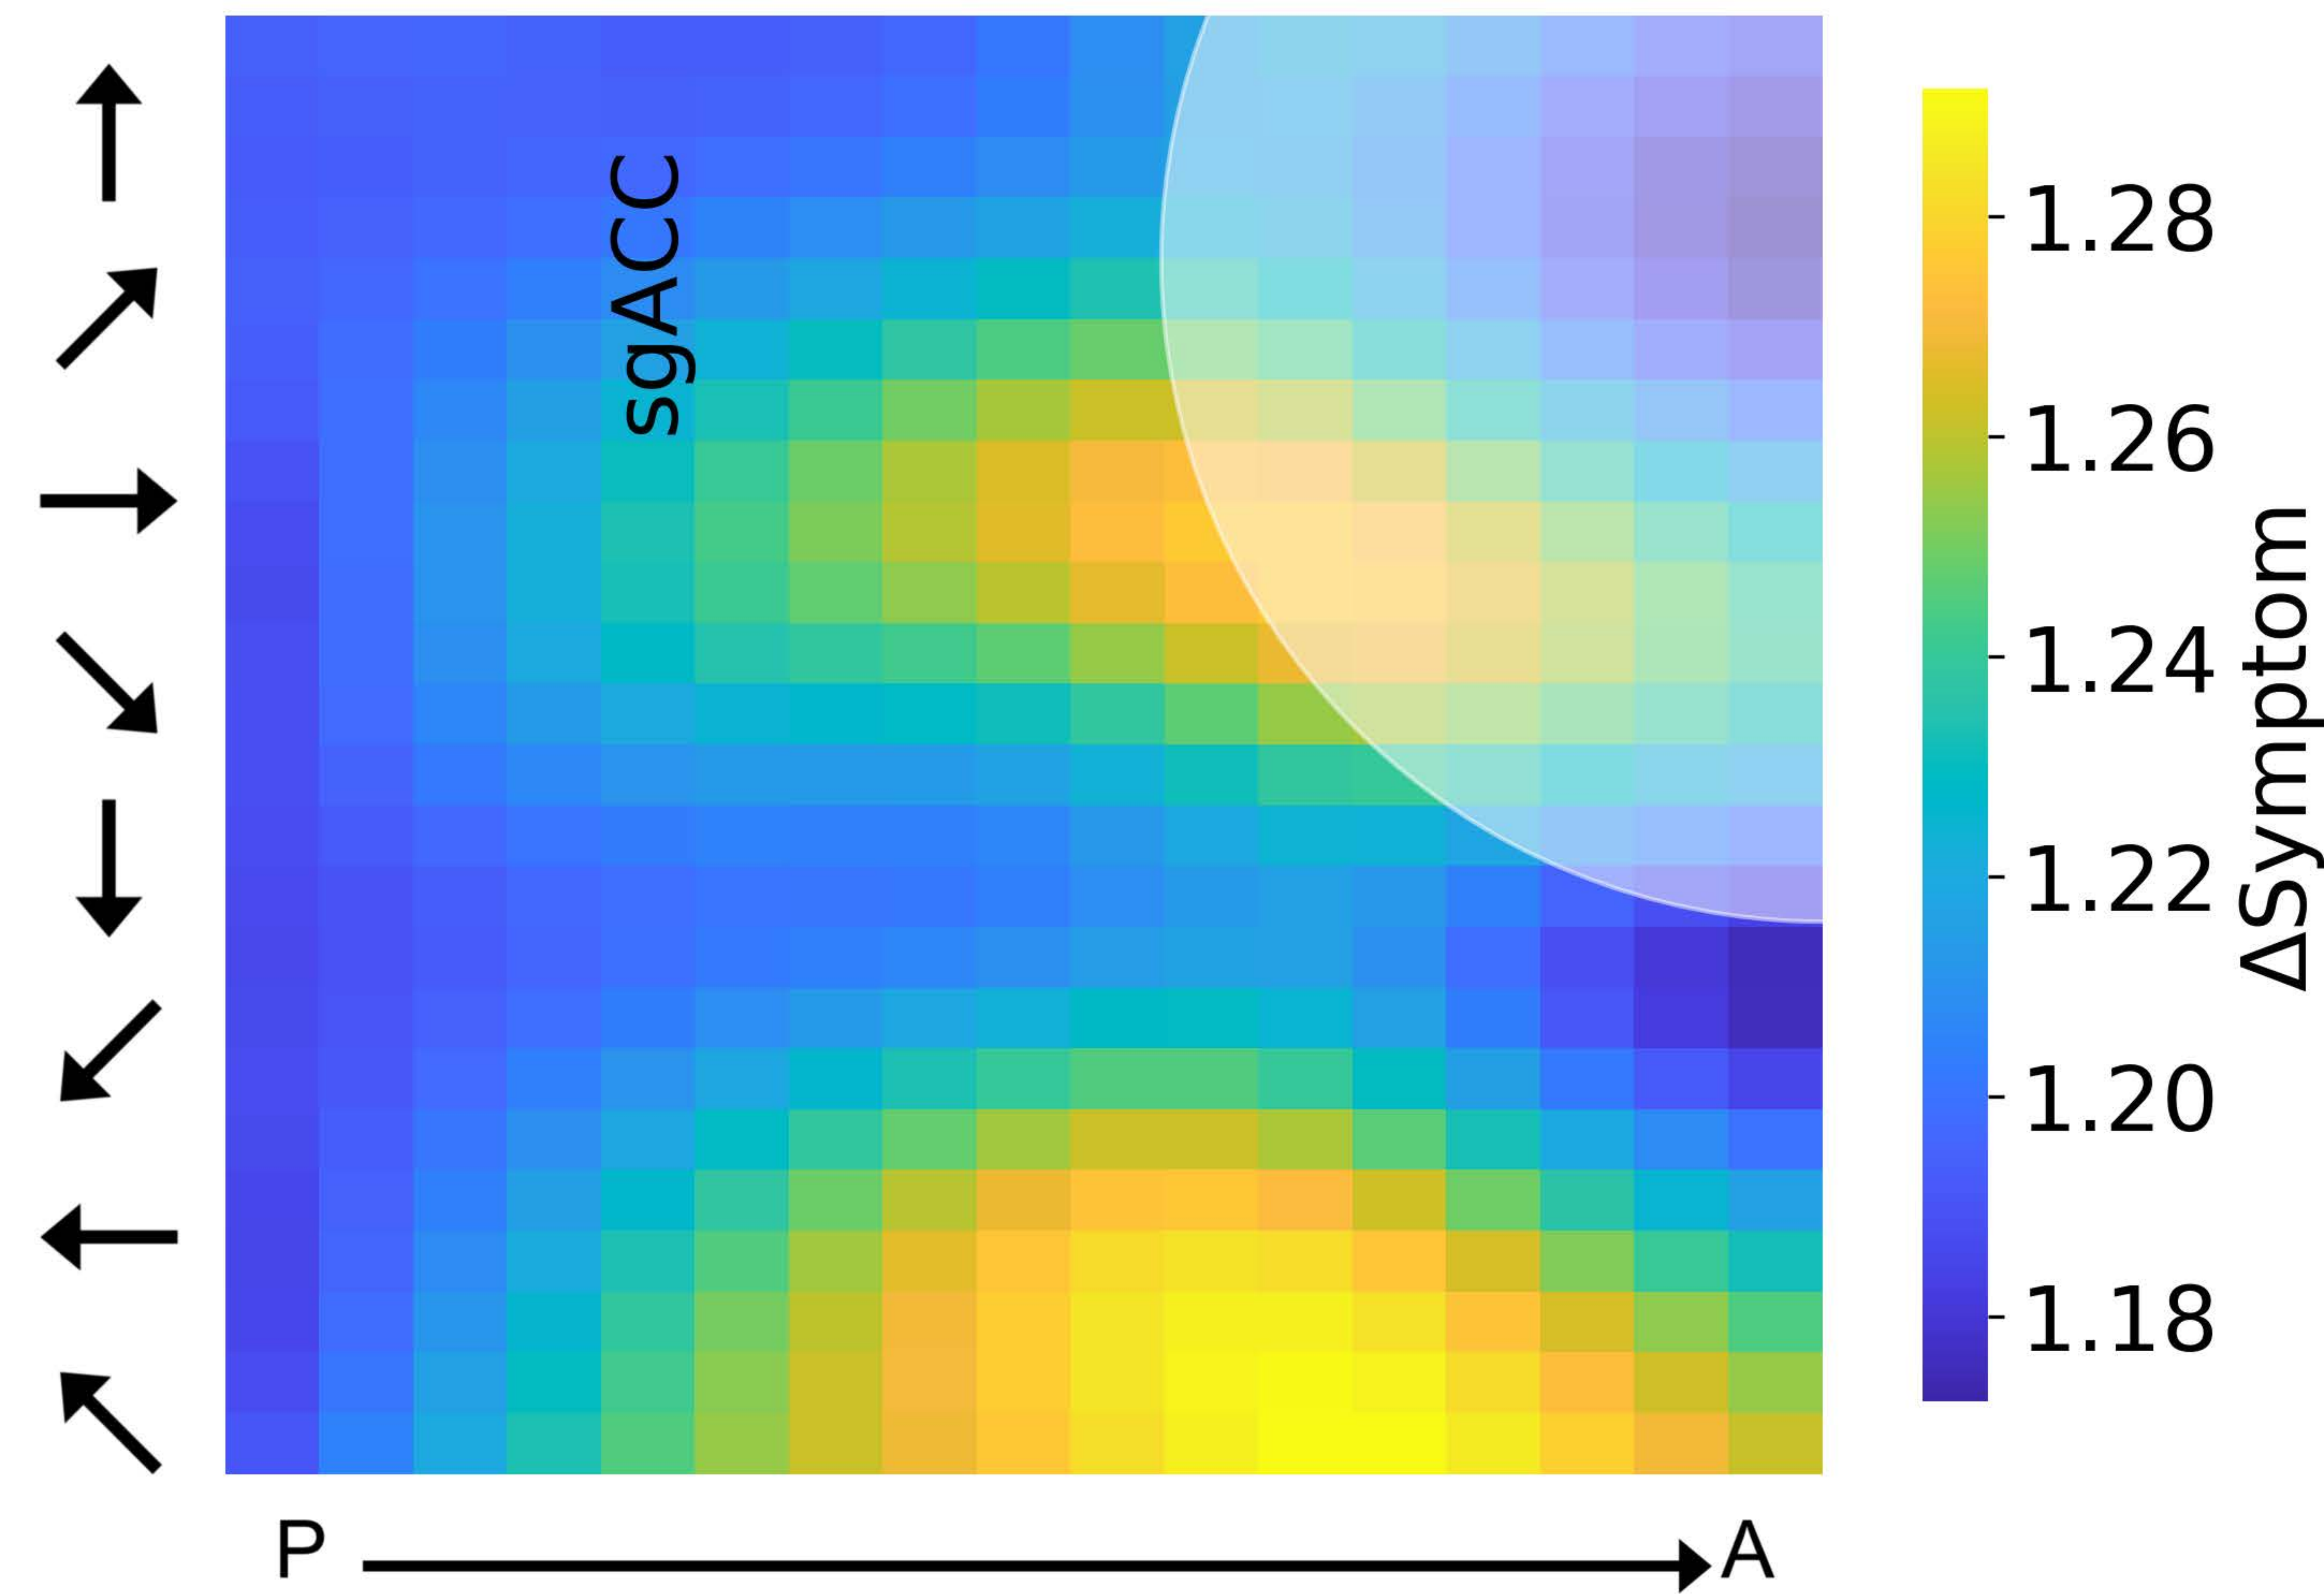



# NDARGA844BF5\_hamd\_right\_dlpfc

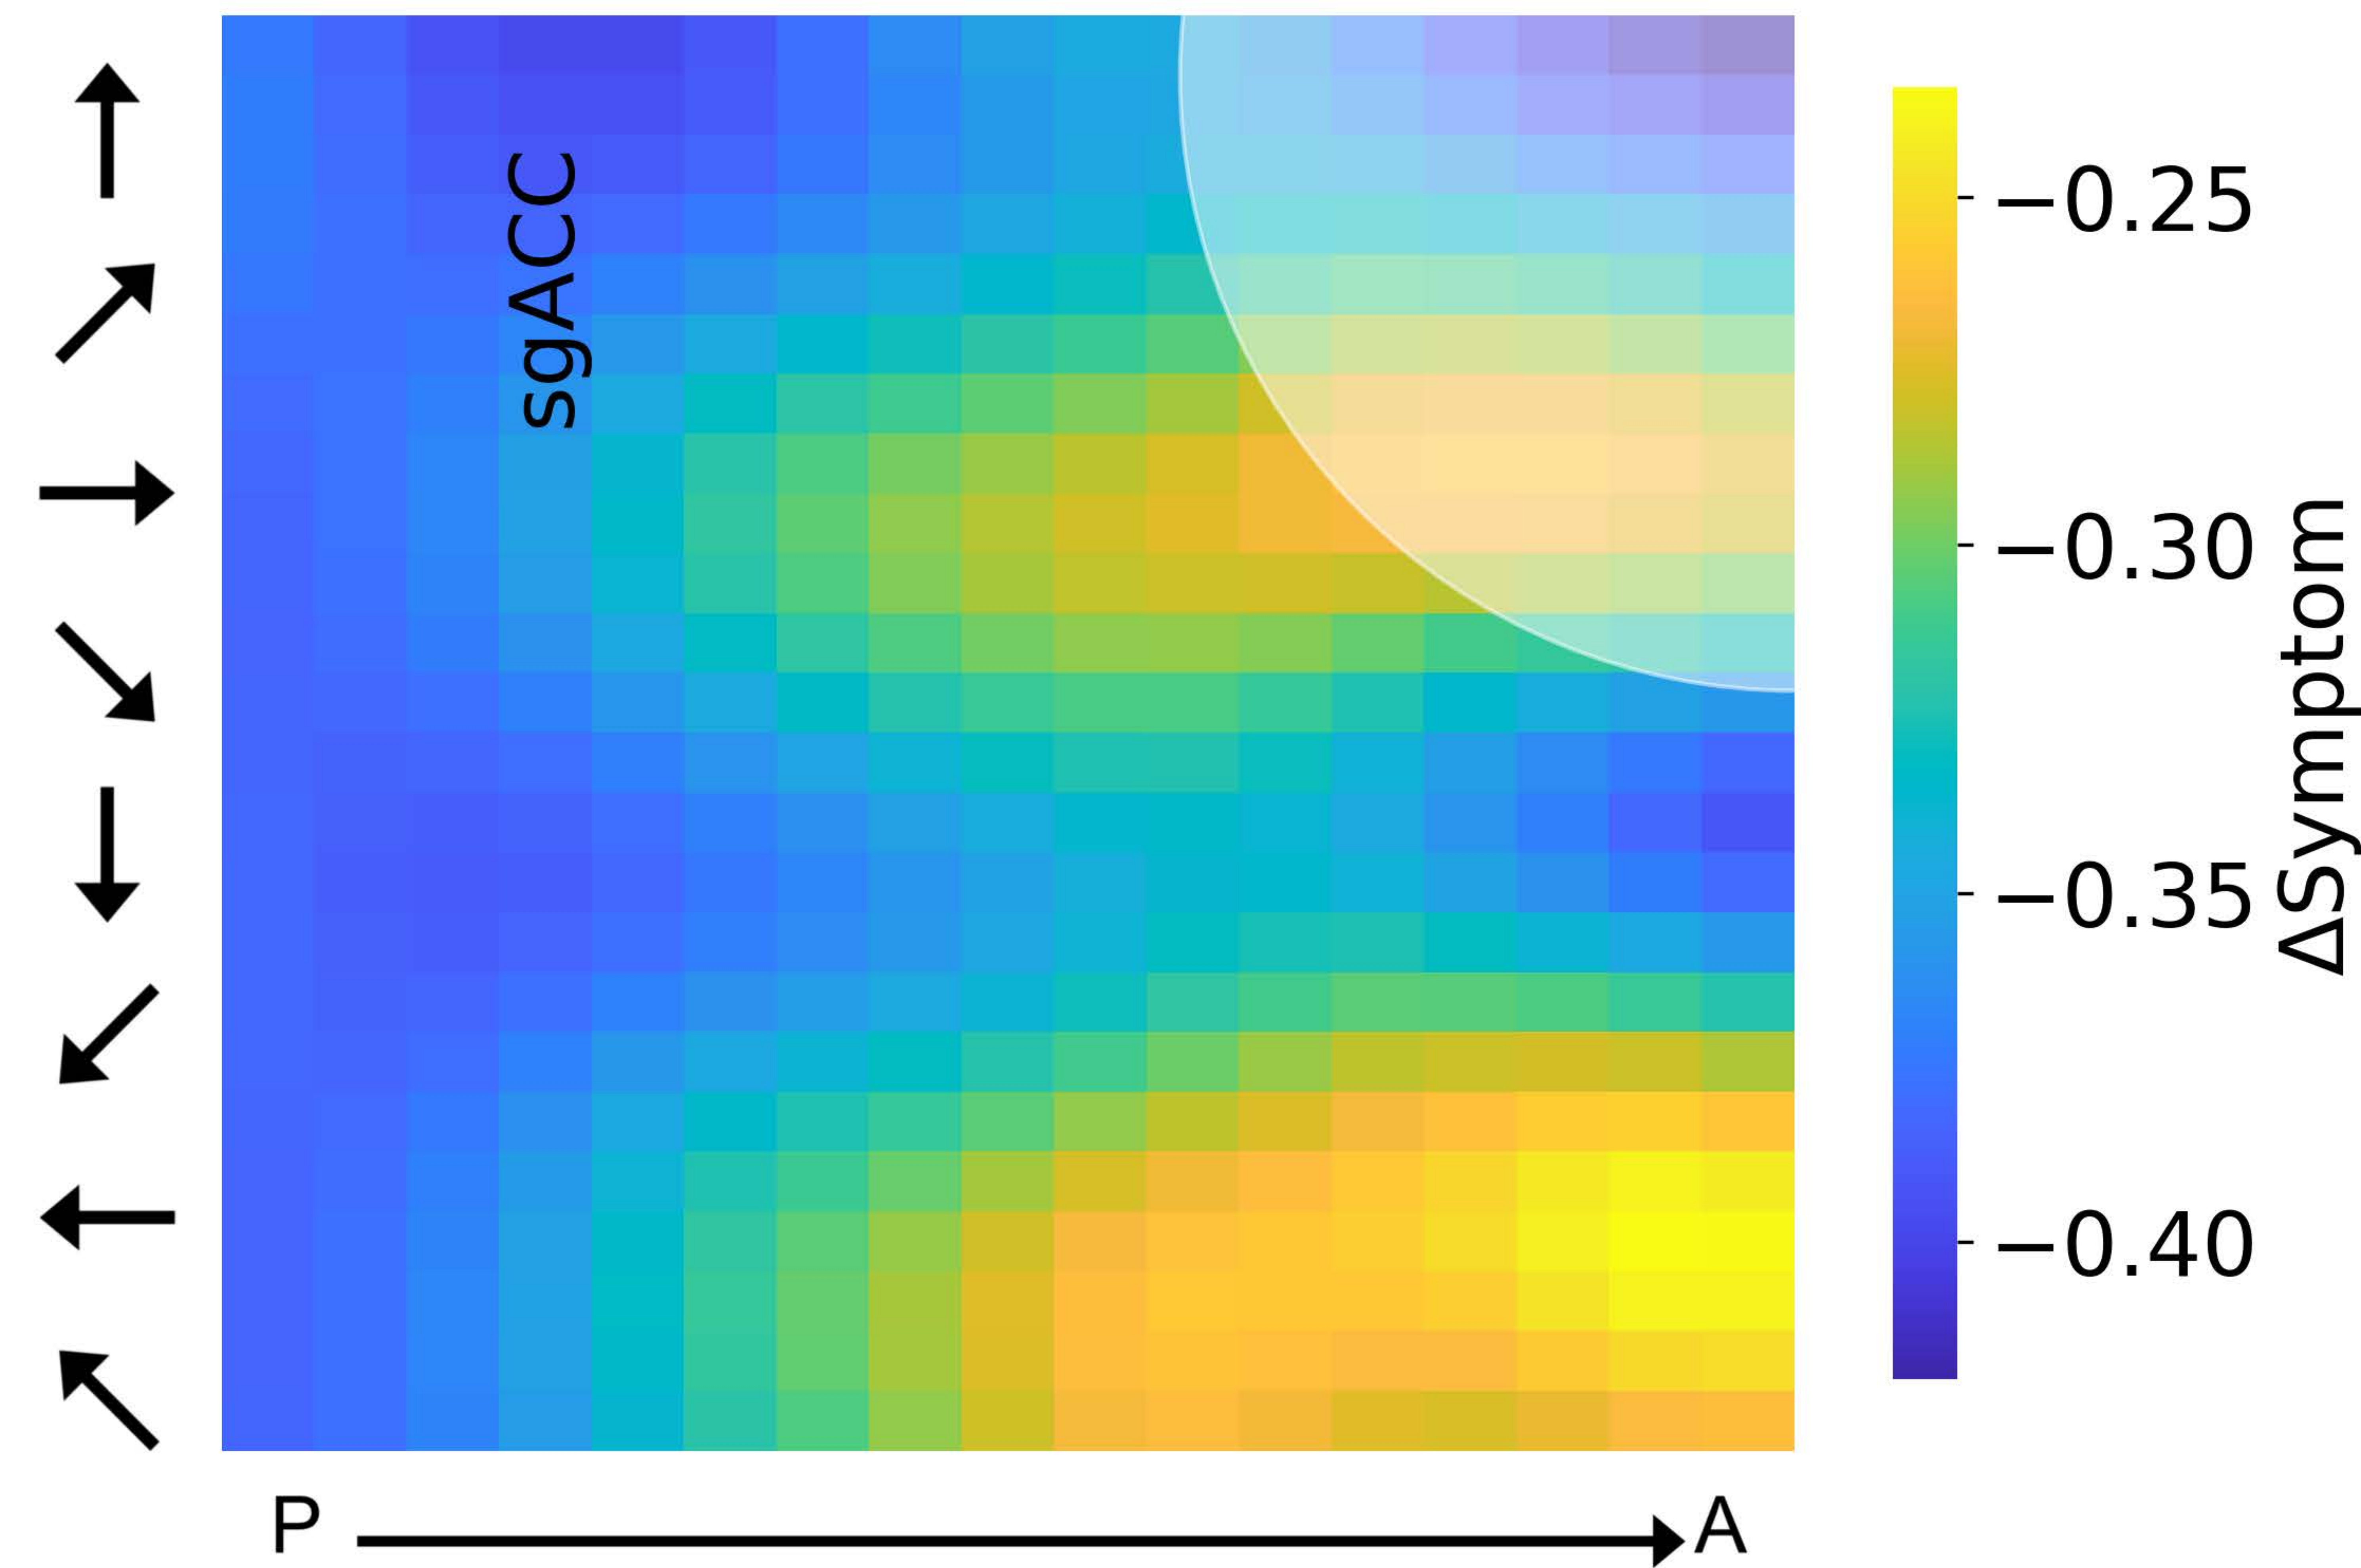



# NDARGN596ENP\_hamd\_right\_dlpfc

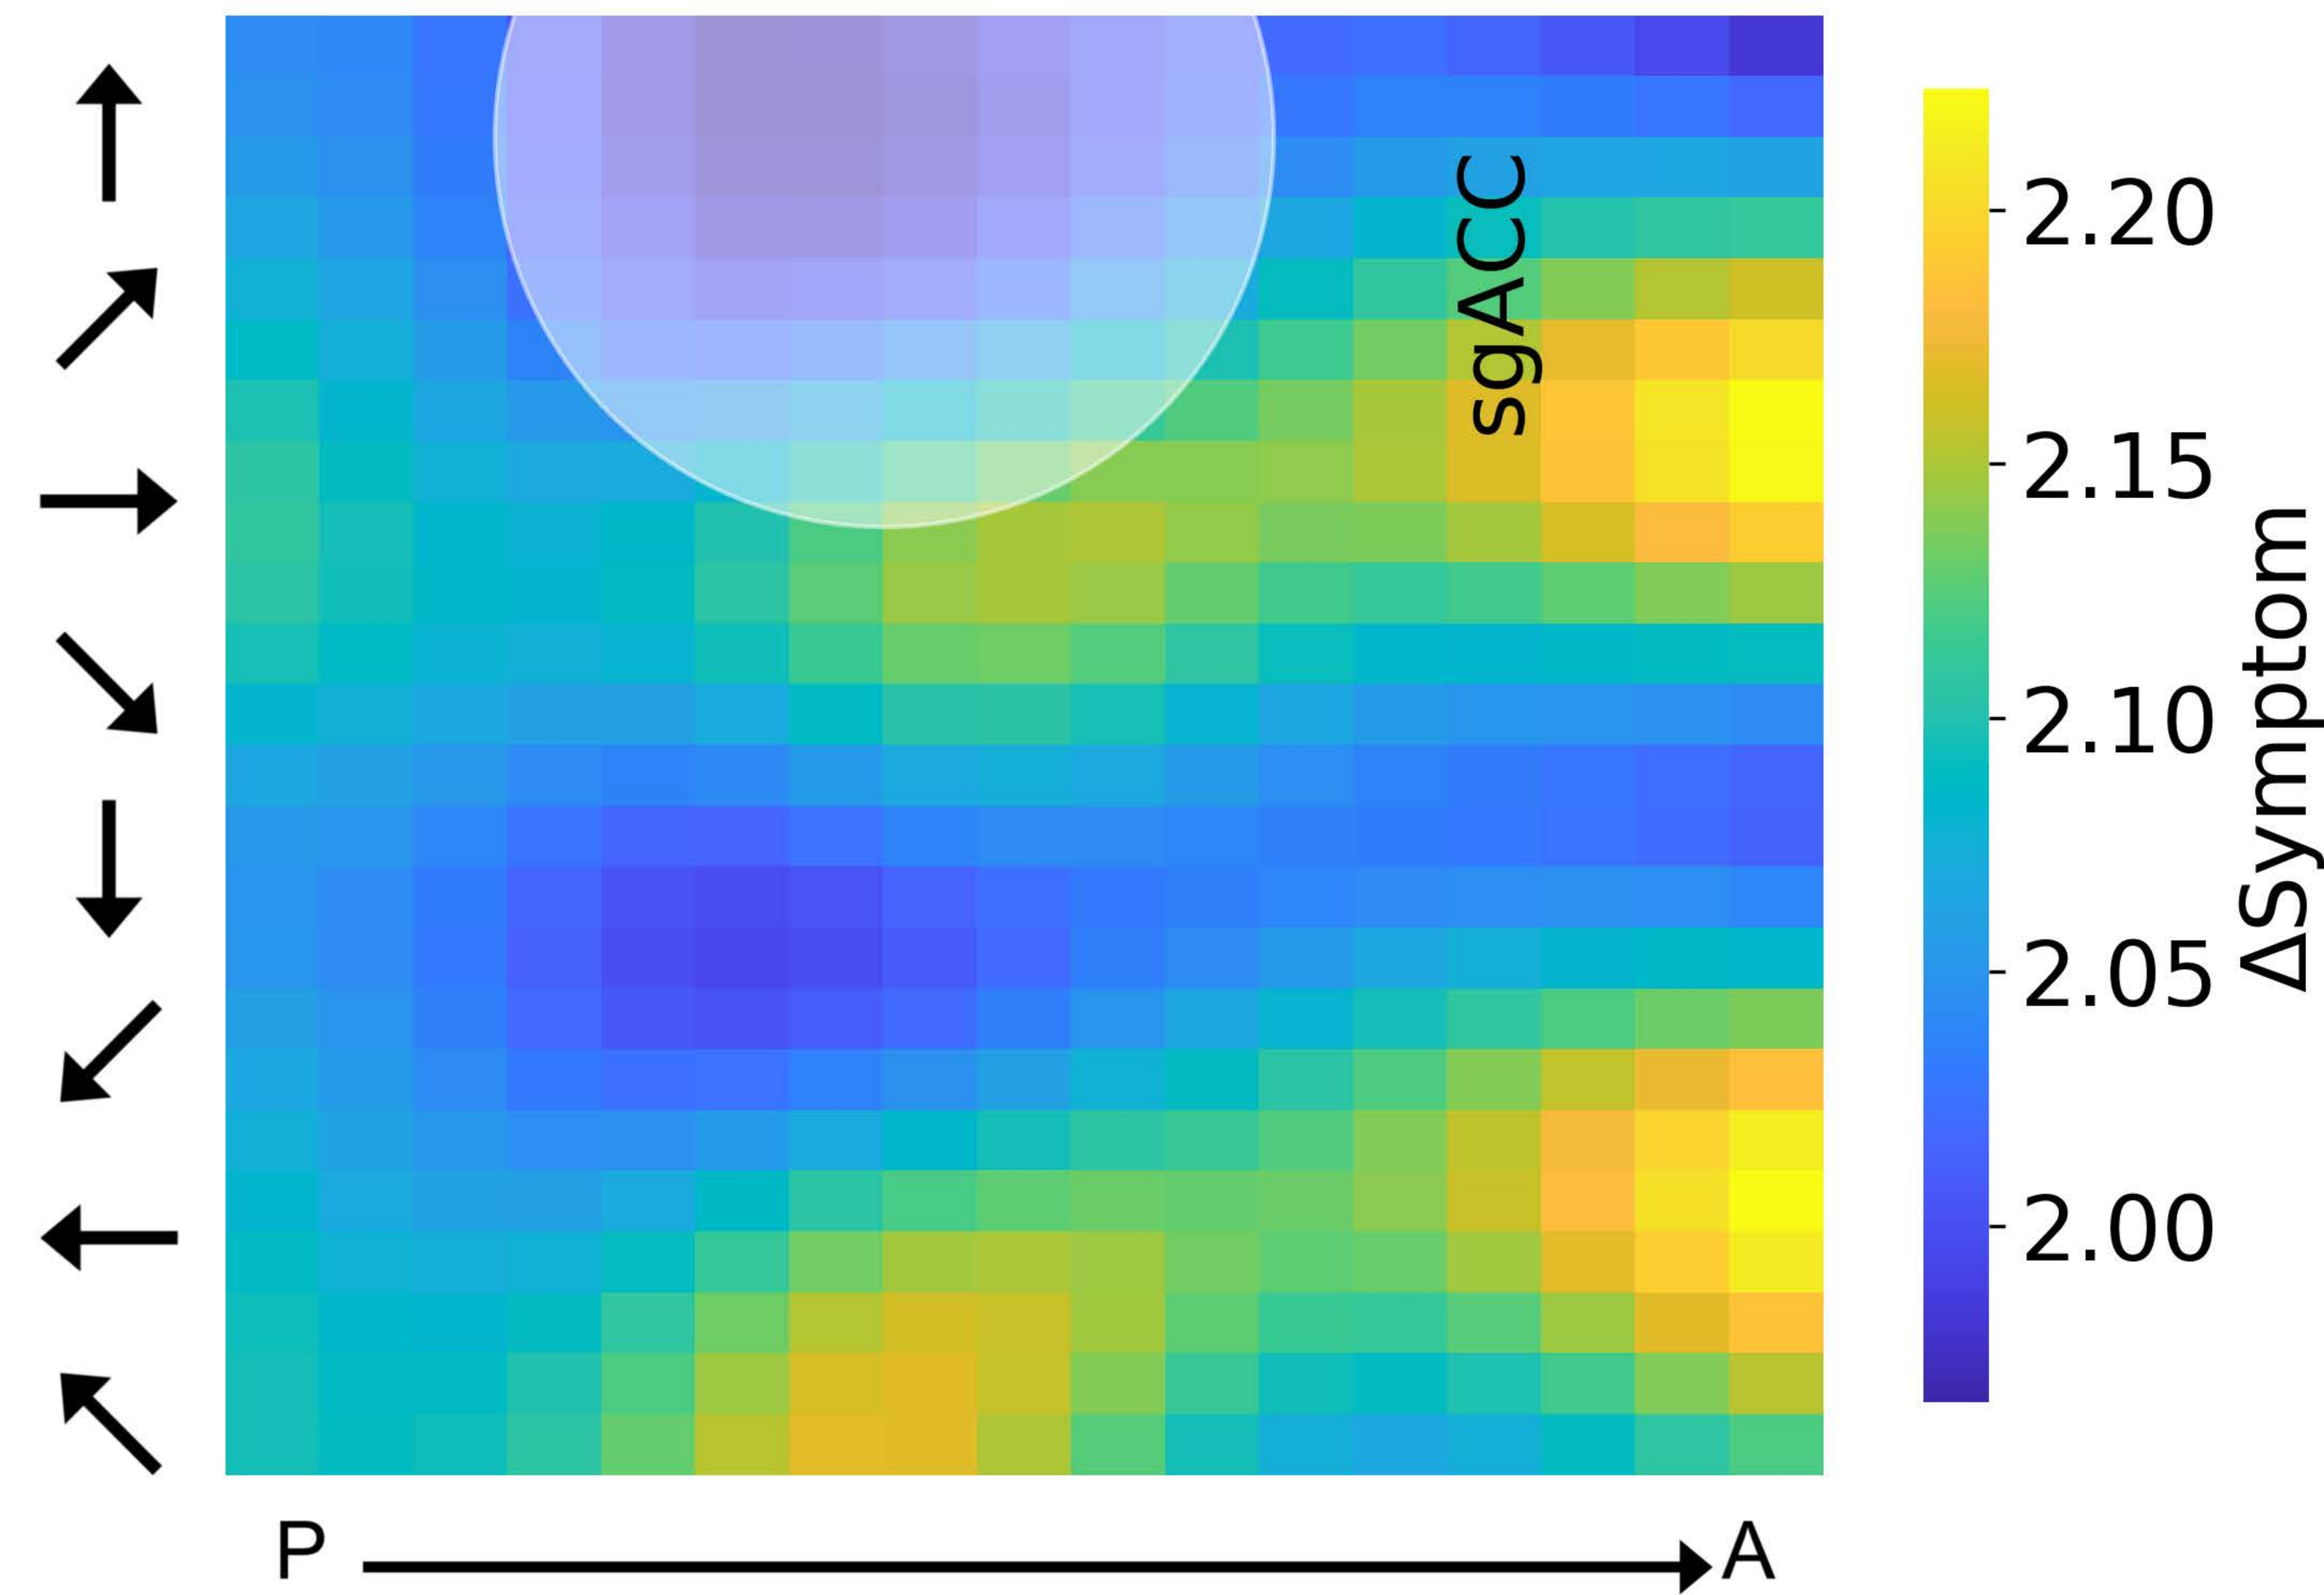



# INDARHU677DFF\_hamd\_right\_dlpfc

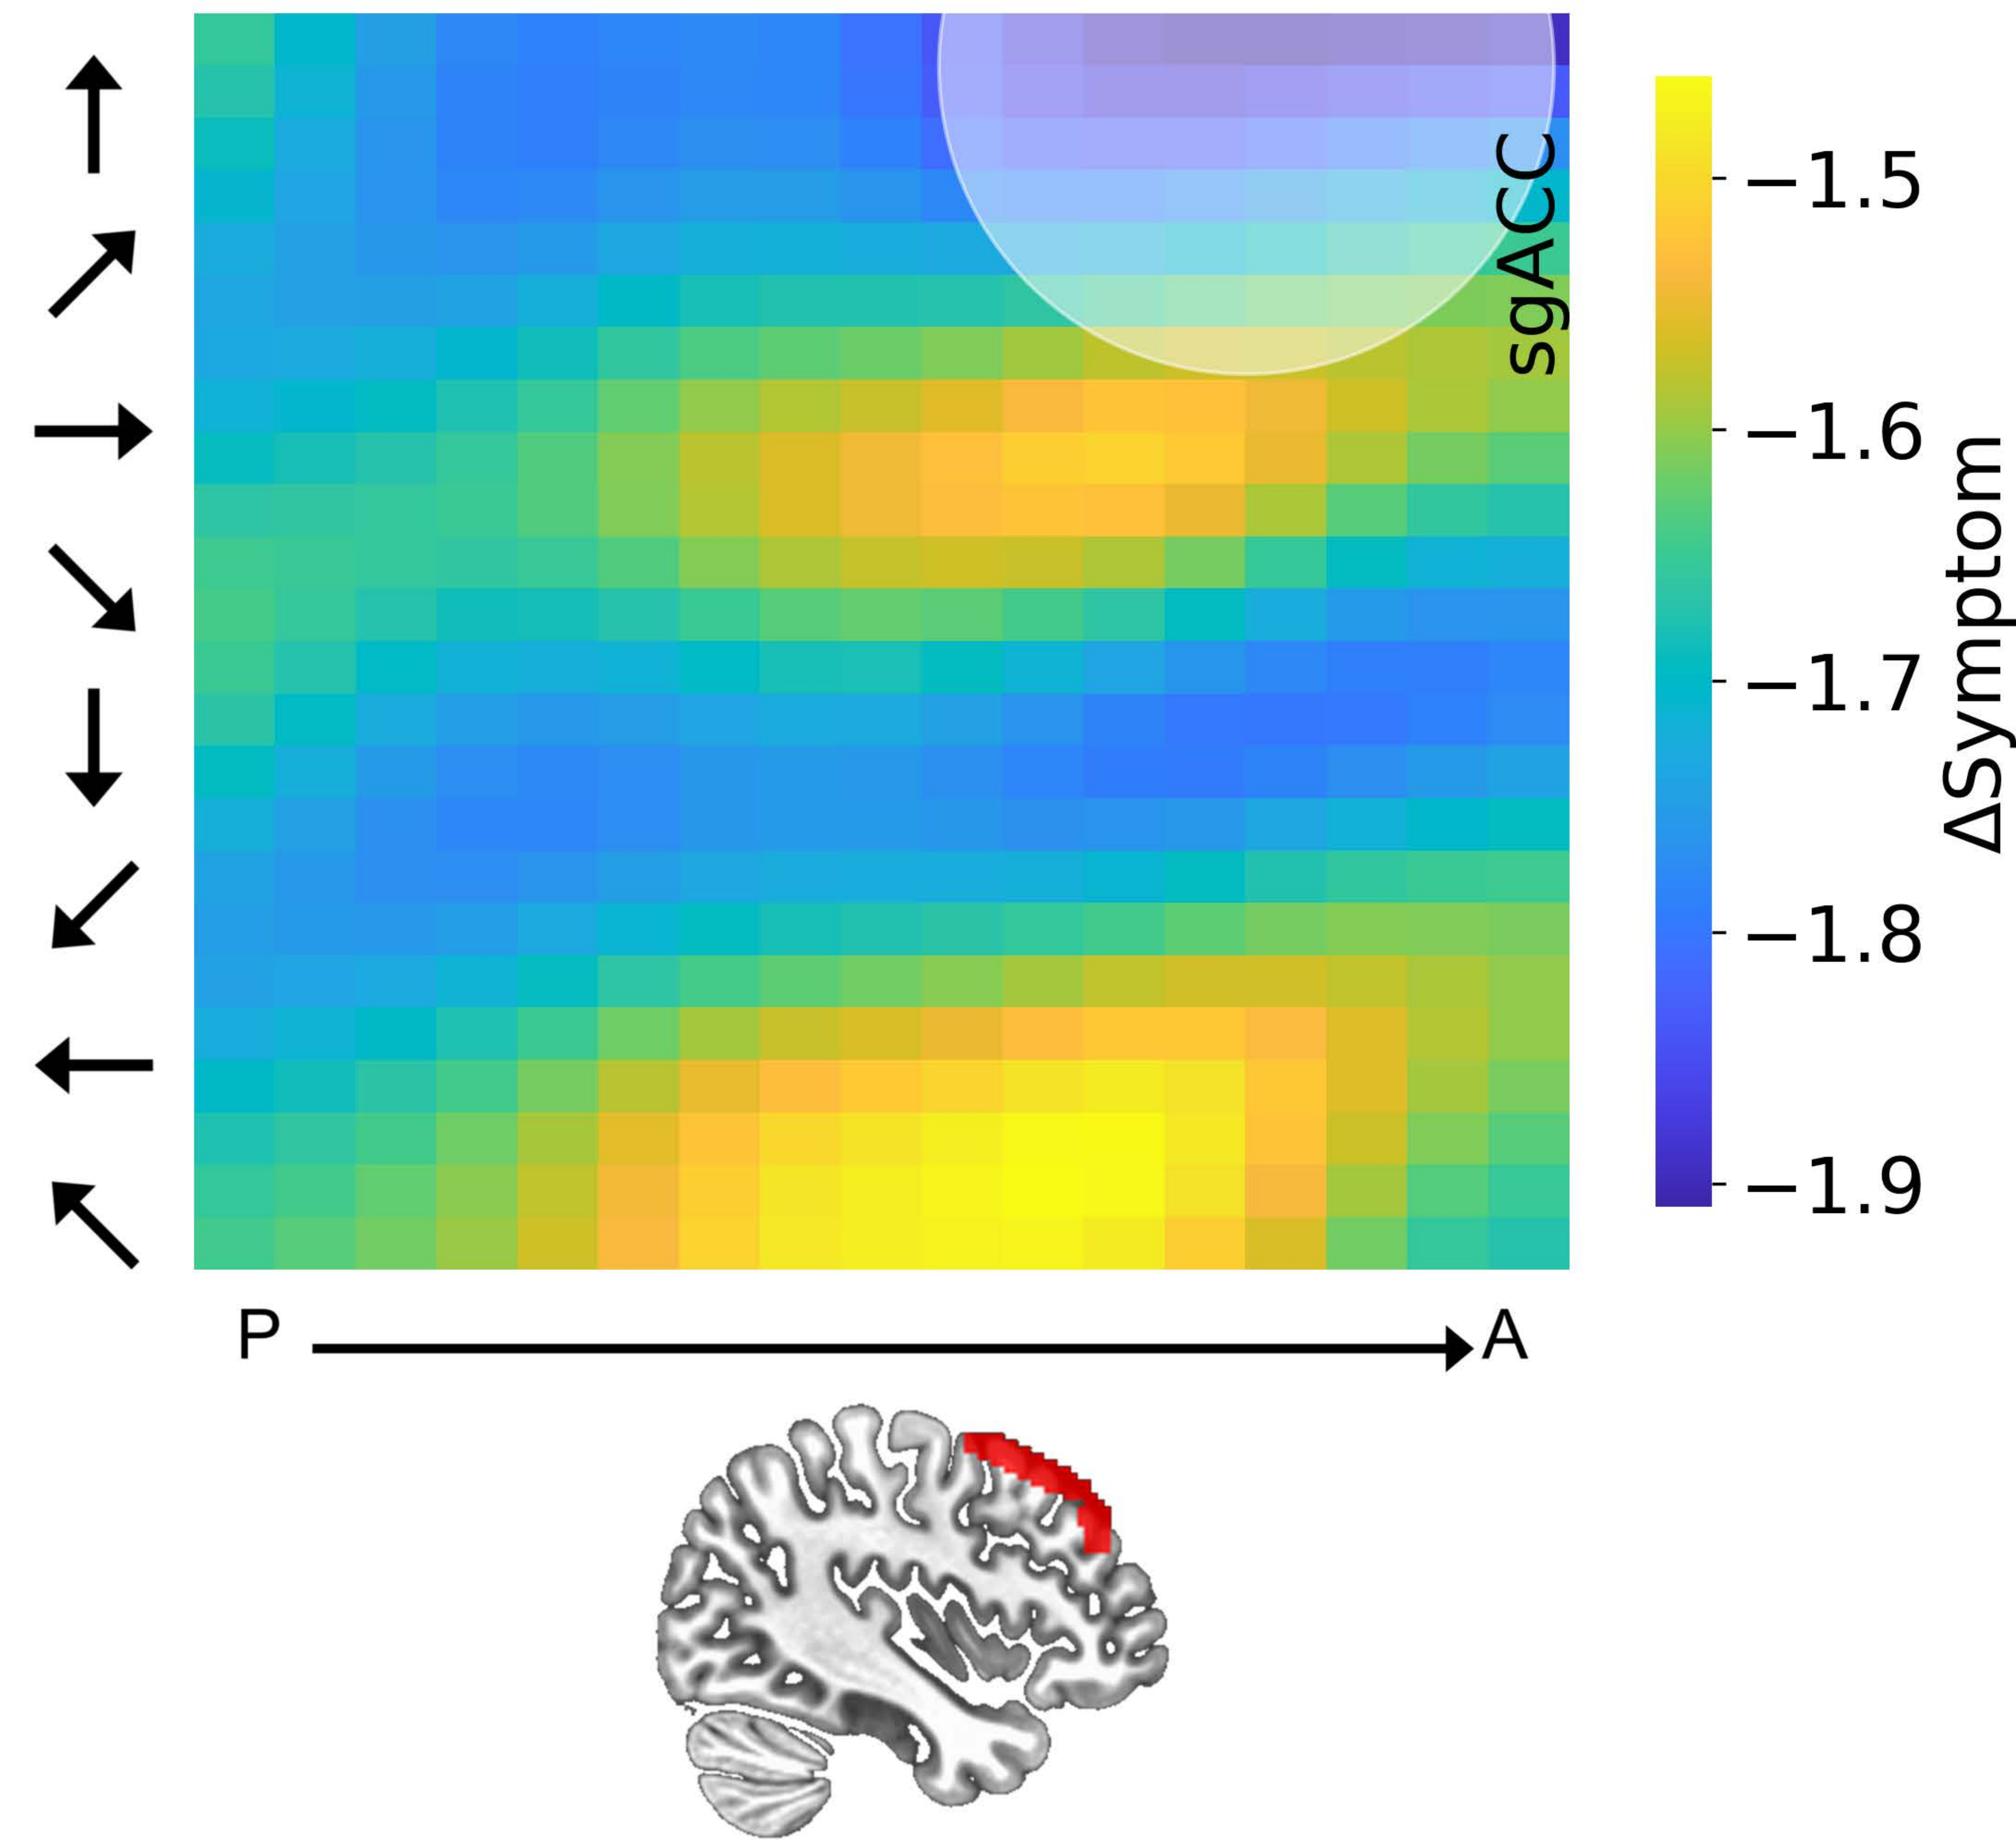



# INDARJL083WMP\_hamd\_right\_dlpfc

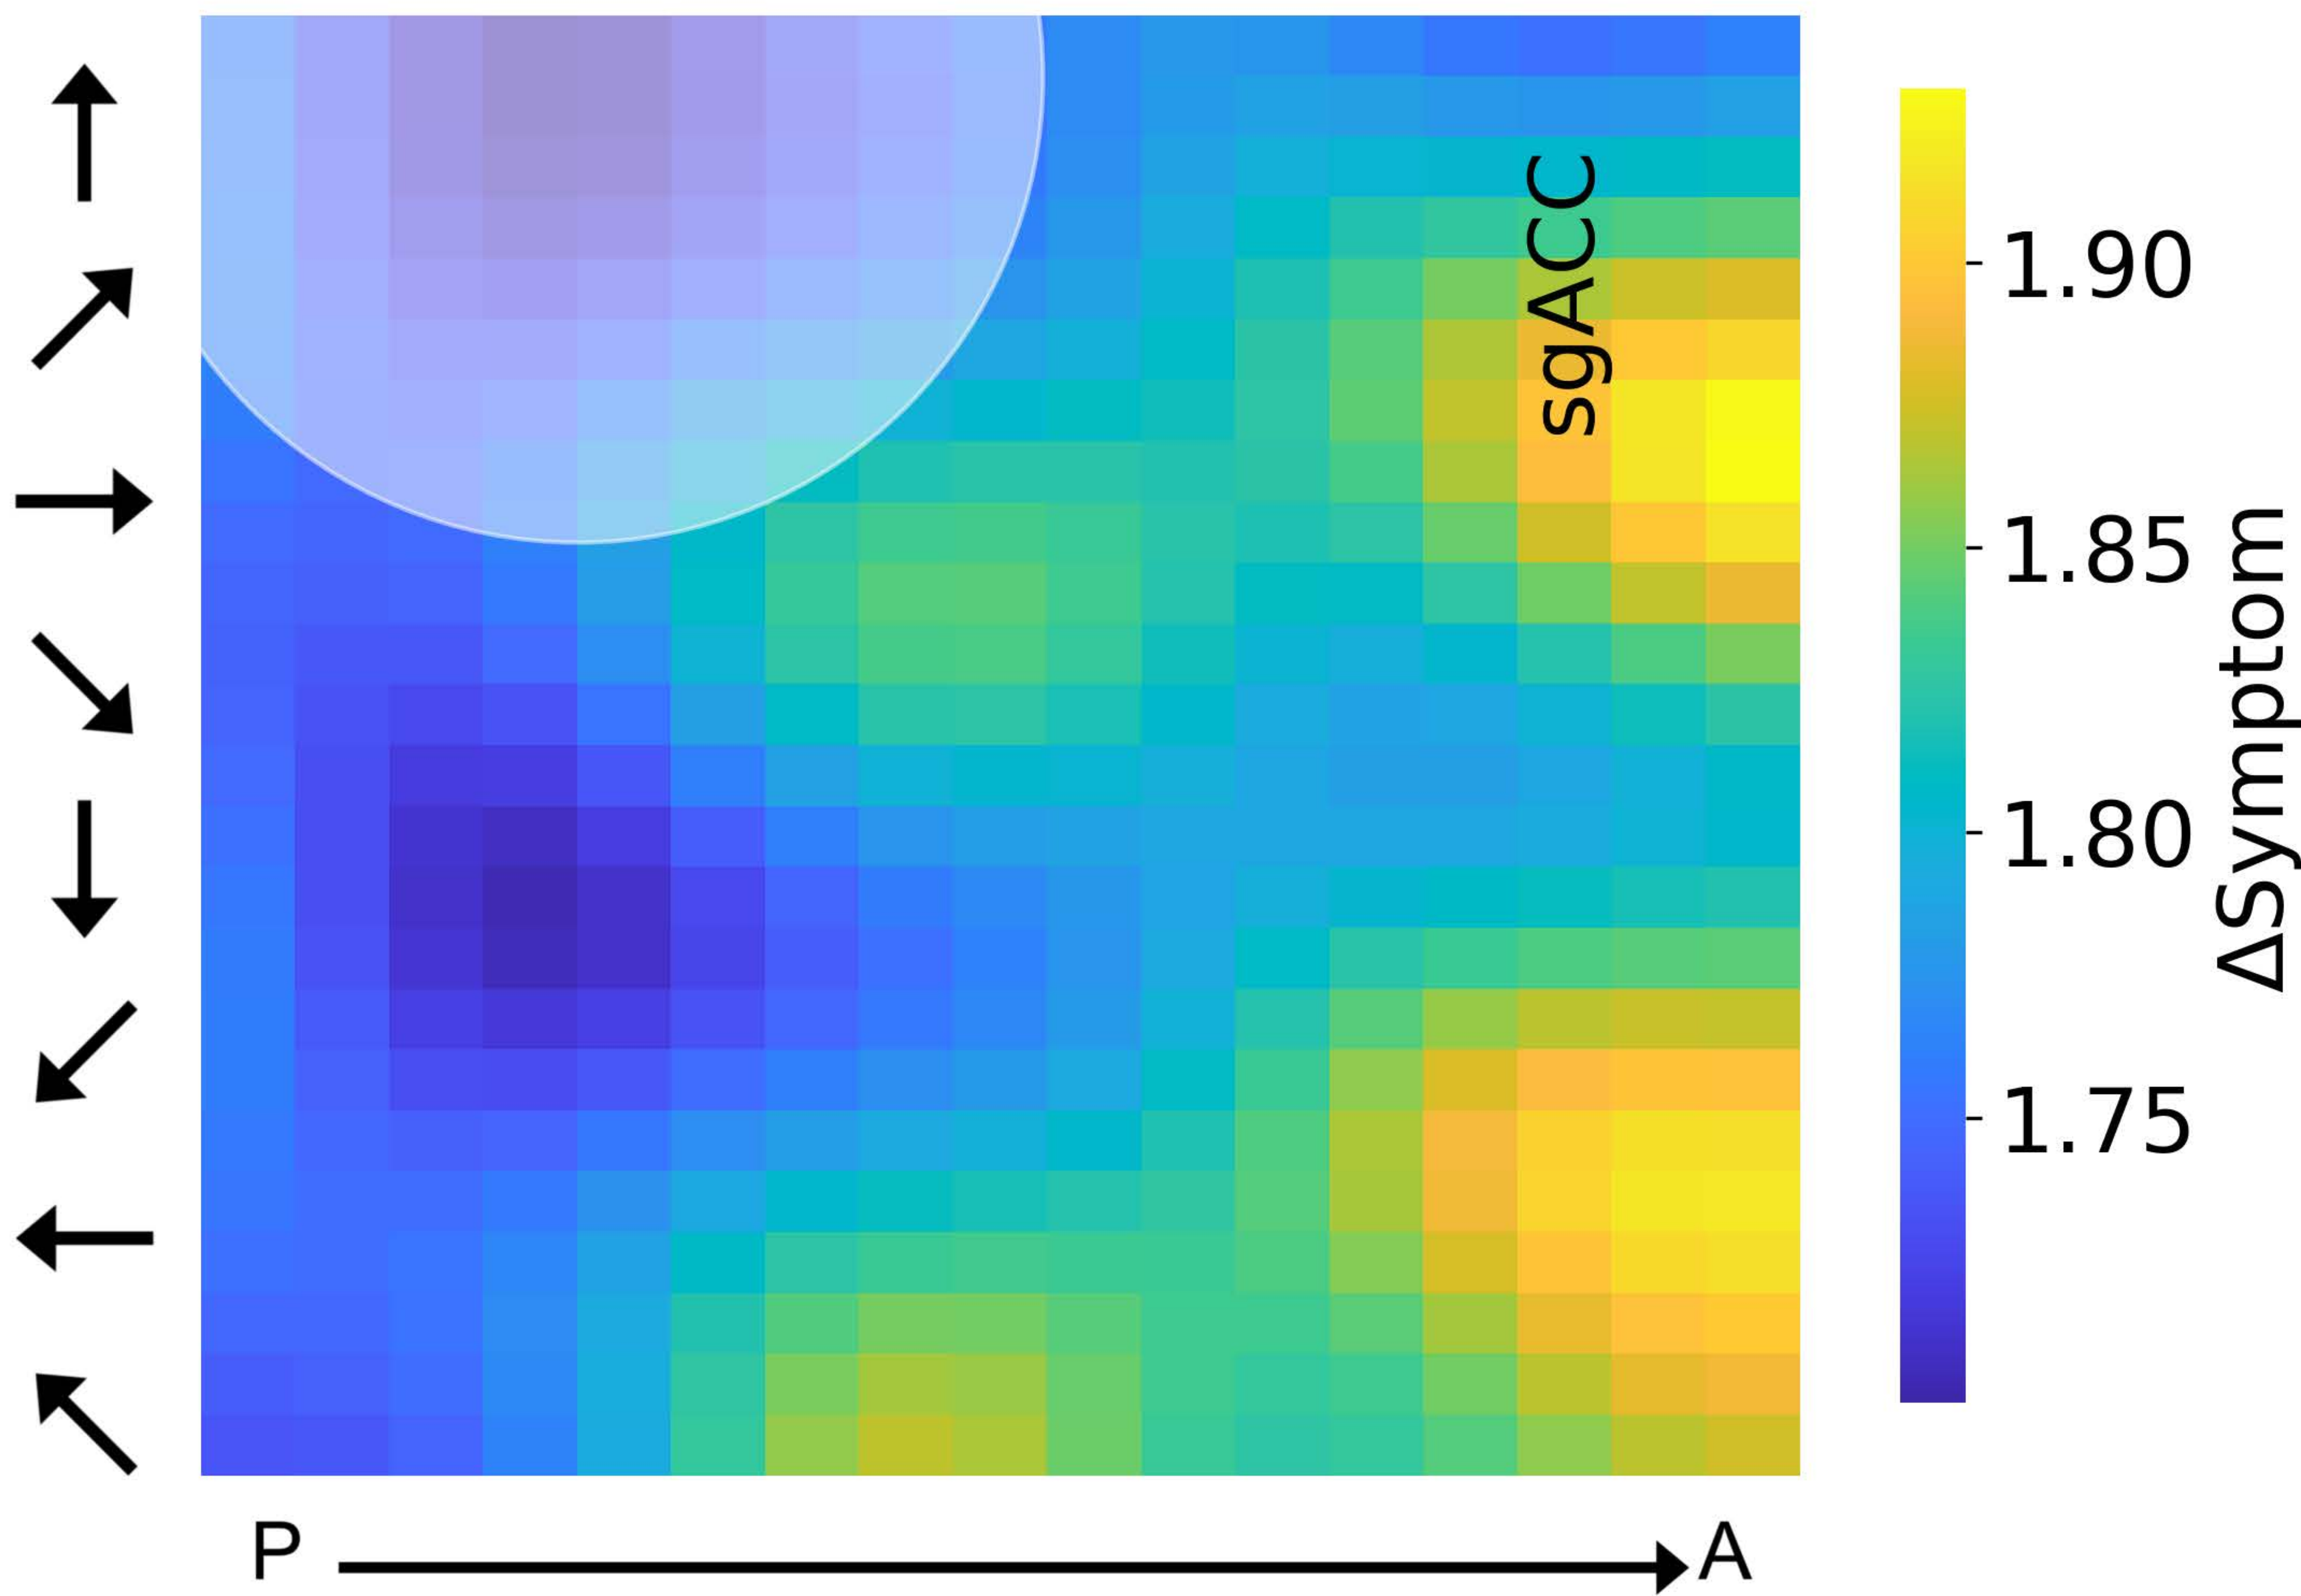



# NDARKR291PWN\_hamd\_right\_dlpfc

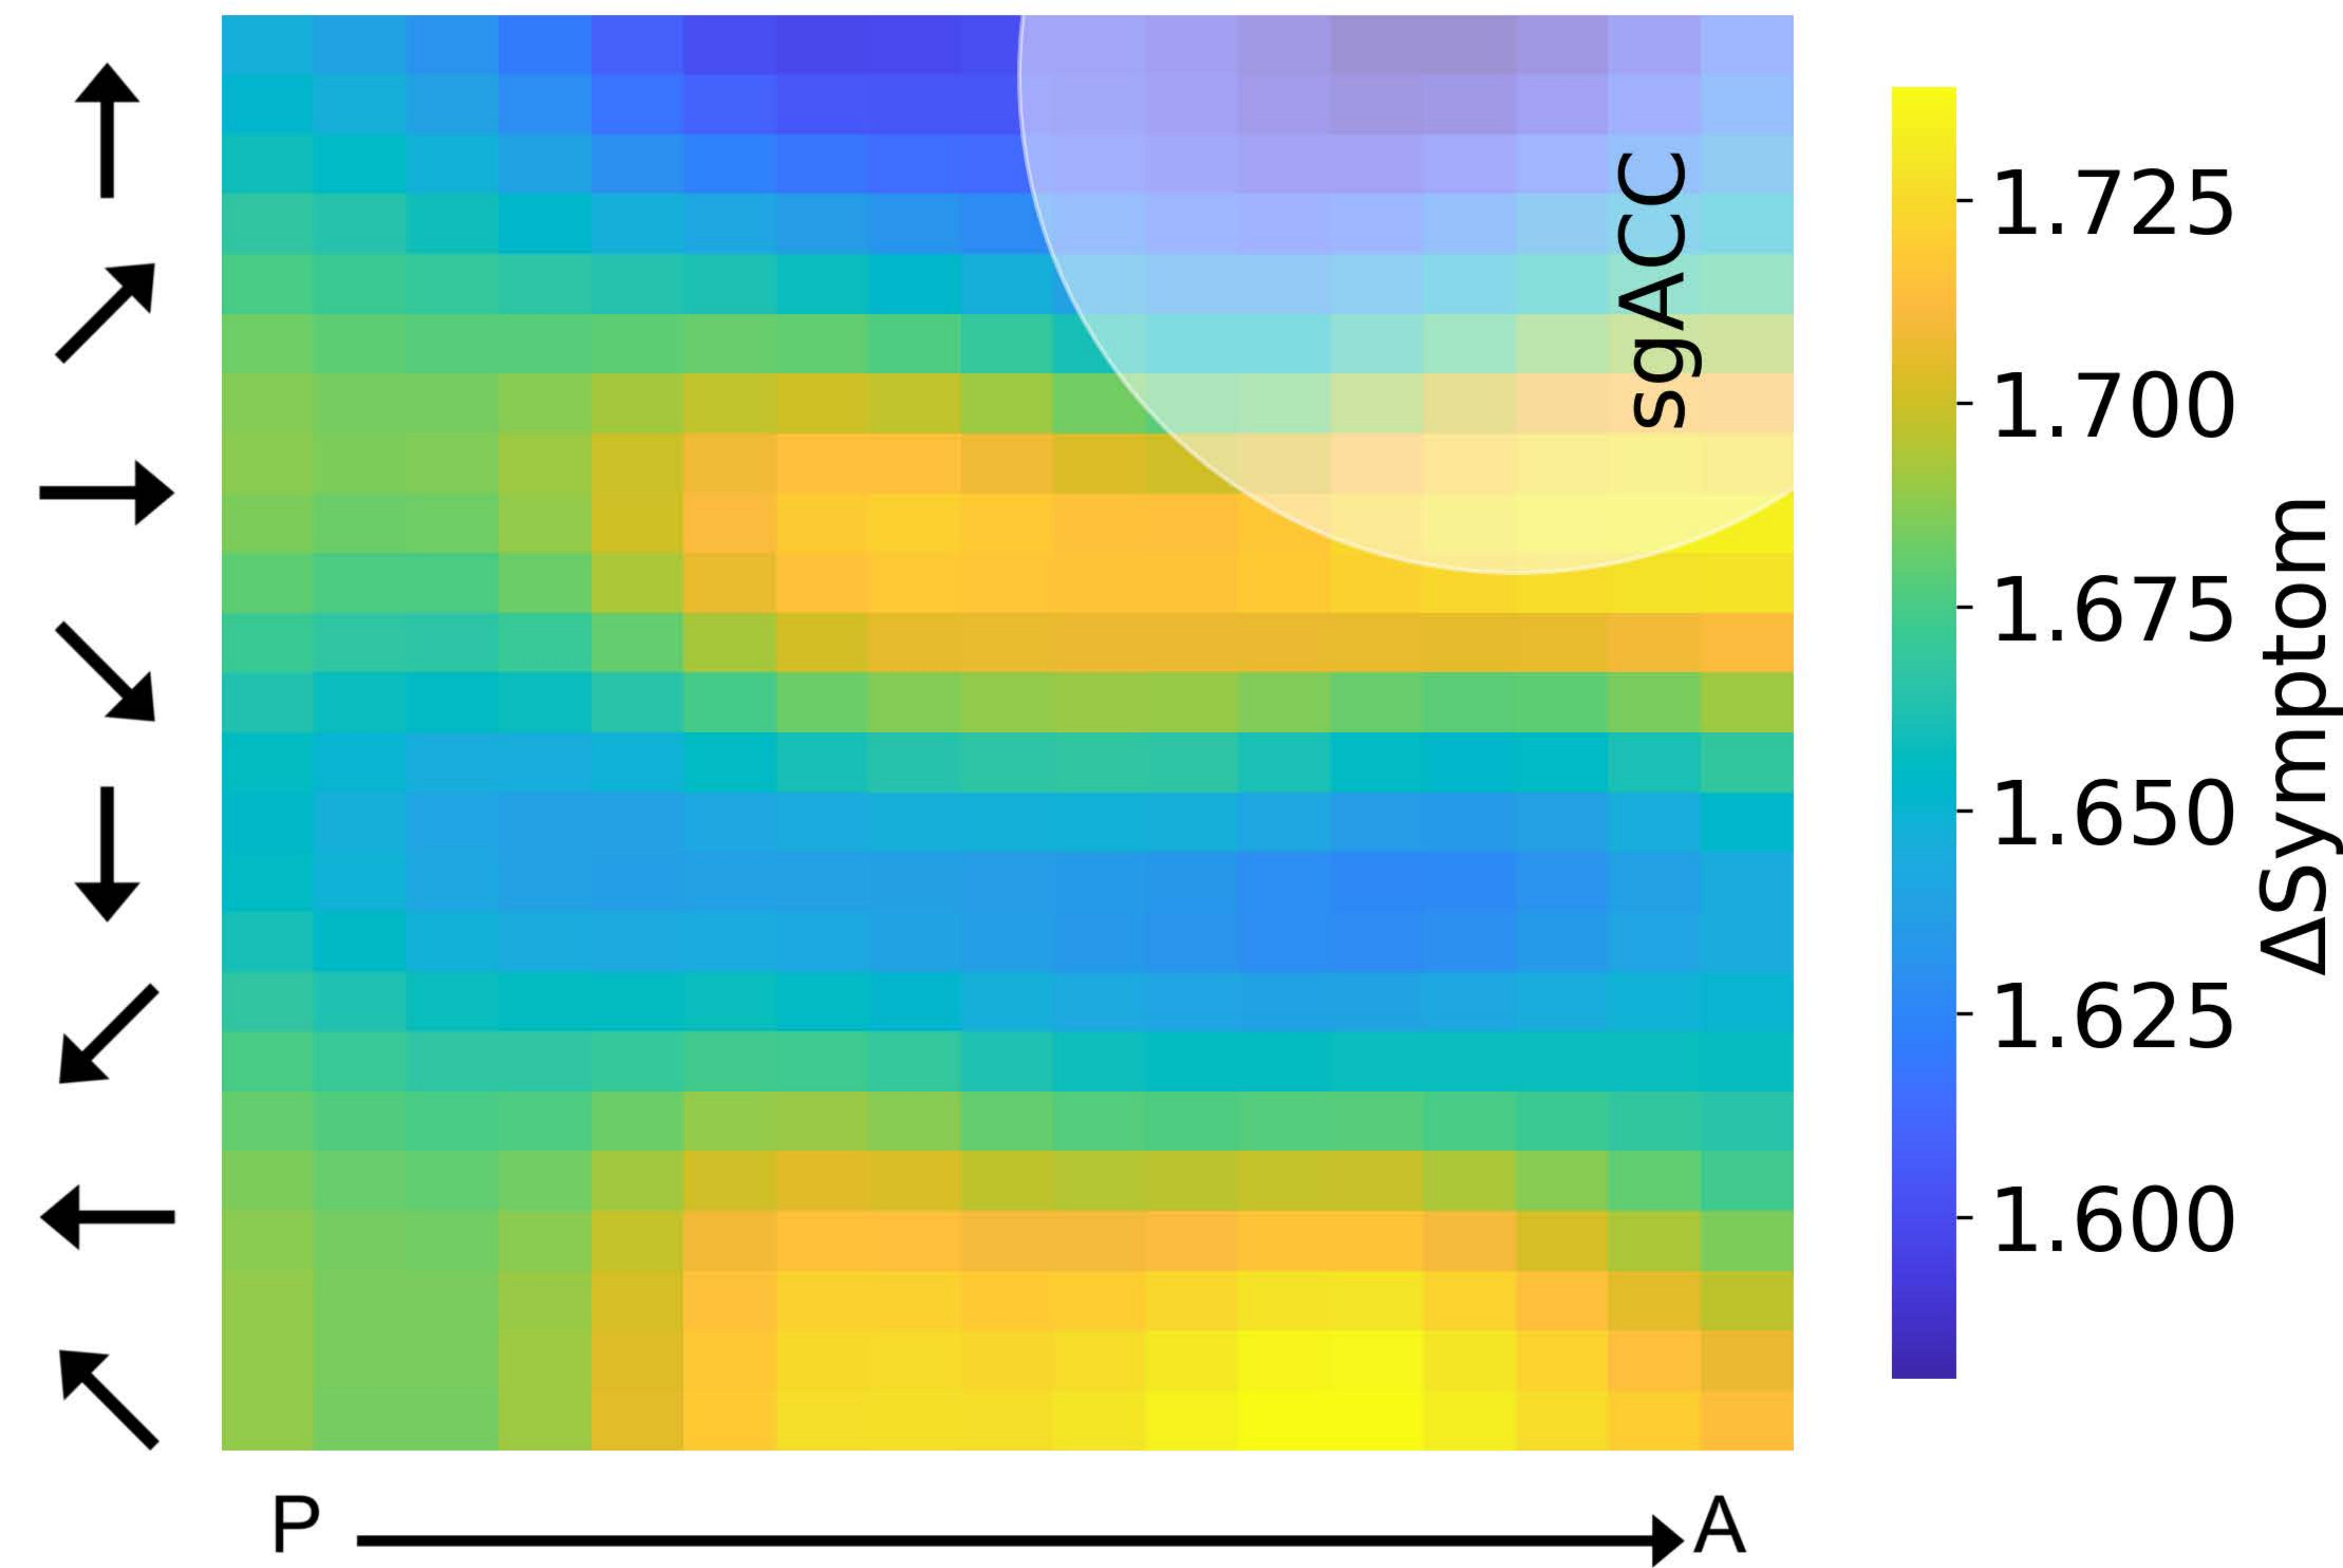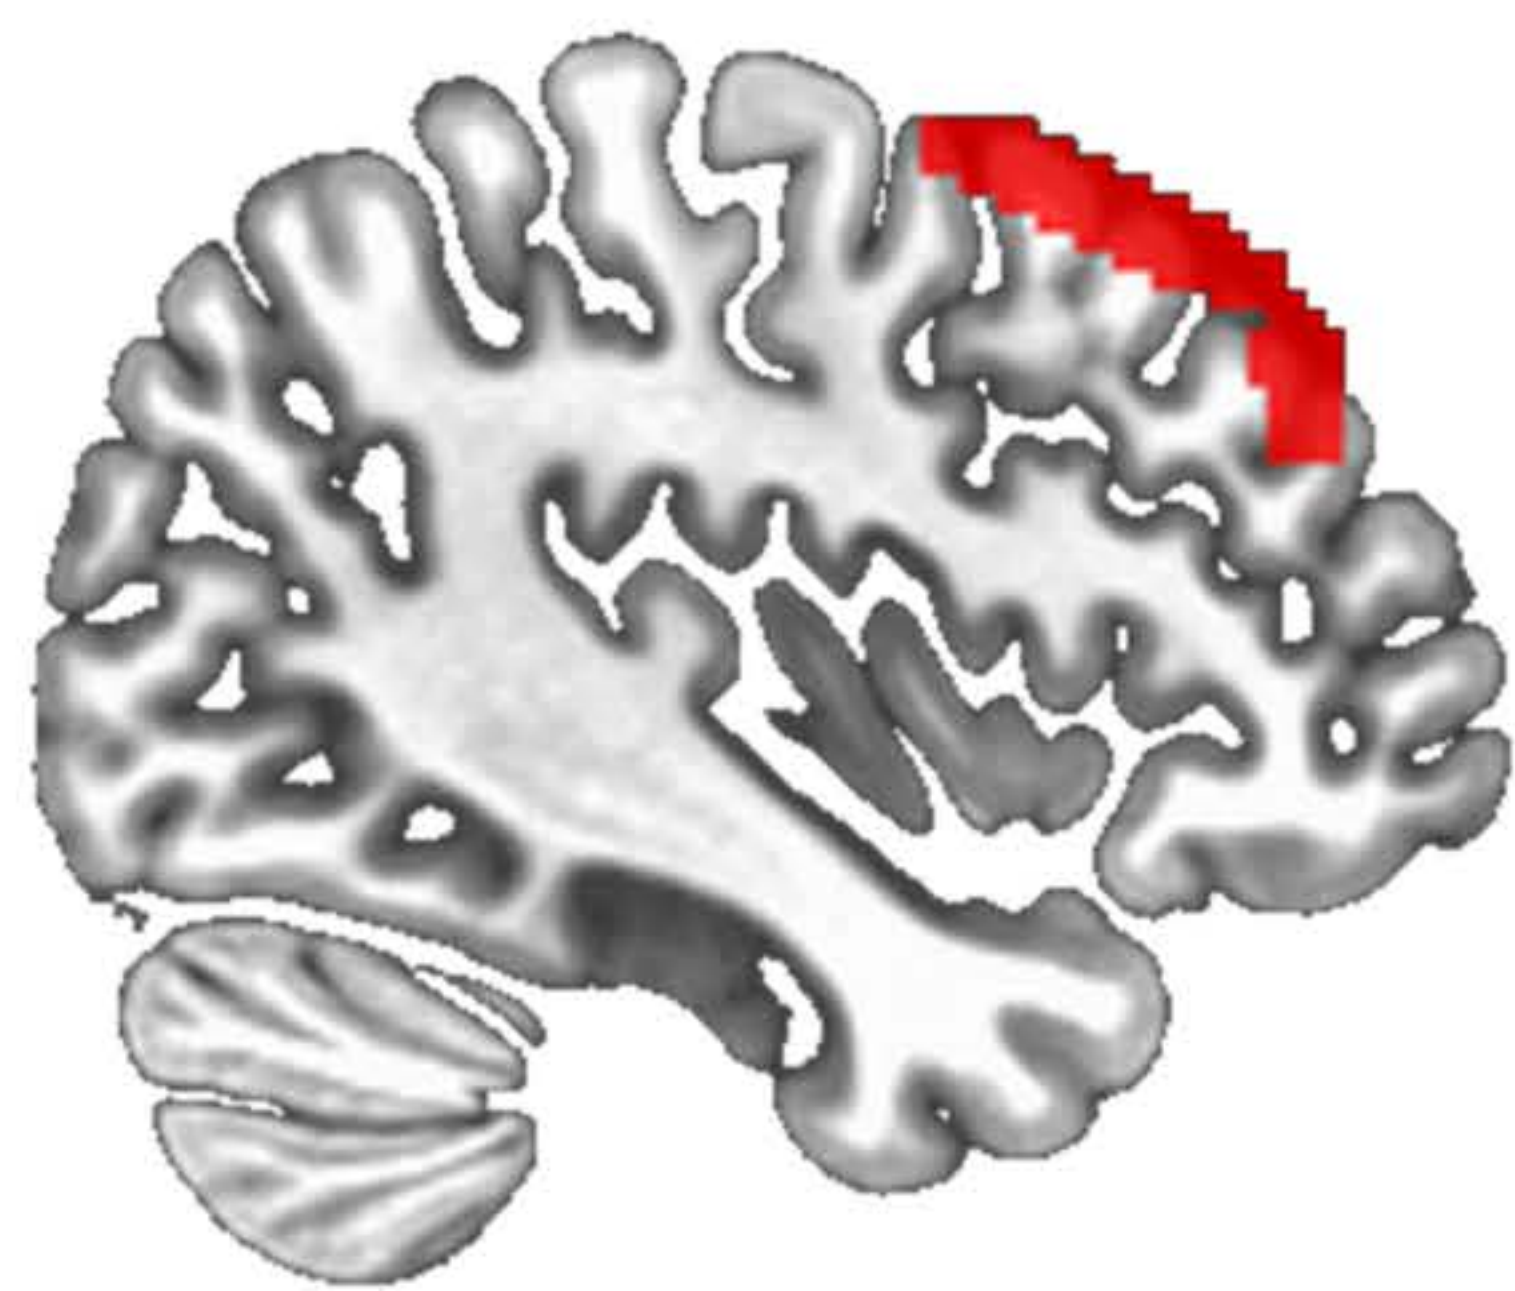



# NDARLH479MBF\_hamd\_right\_dlpfc

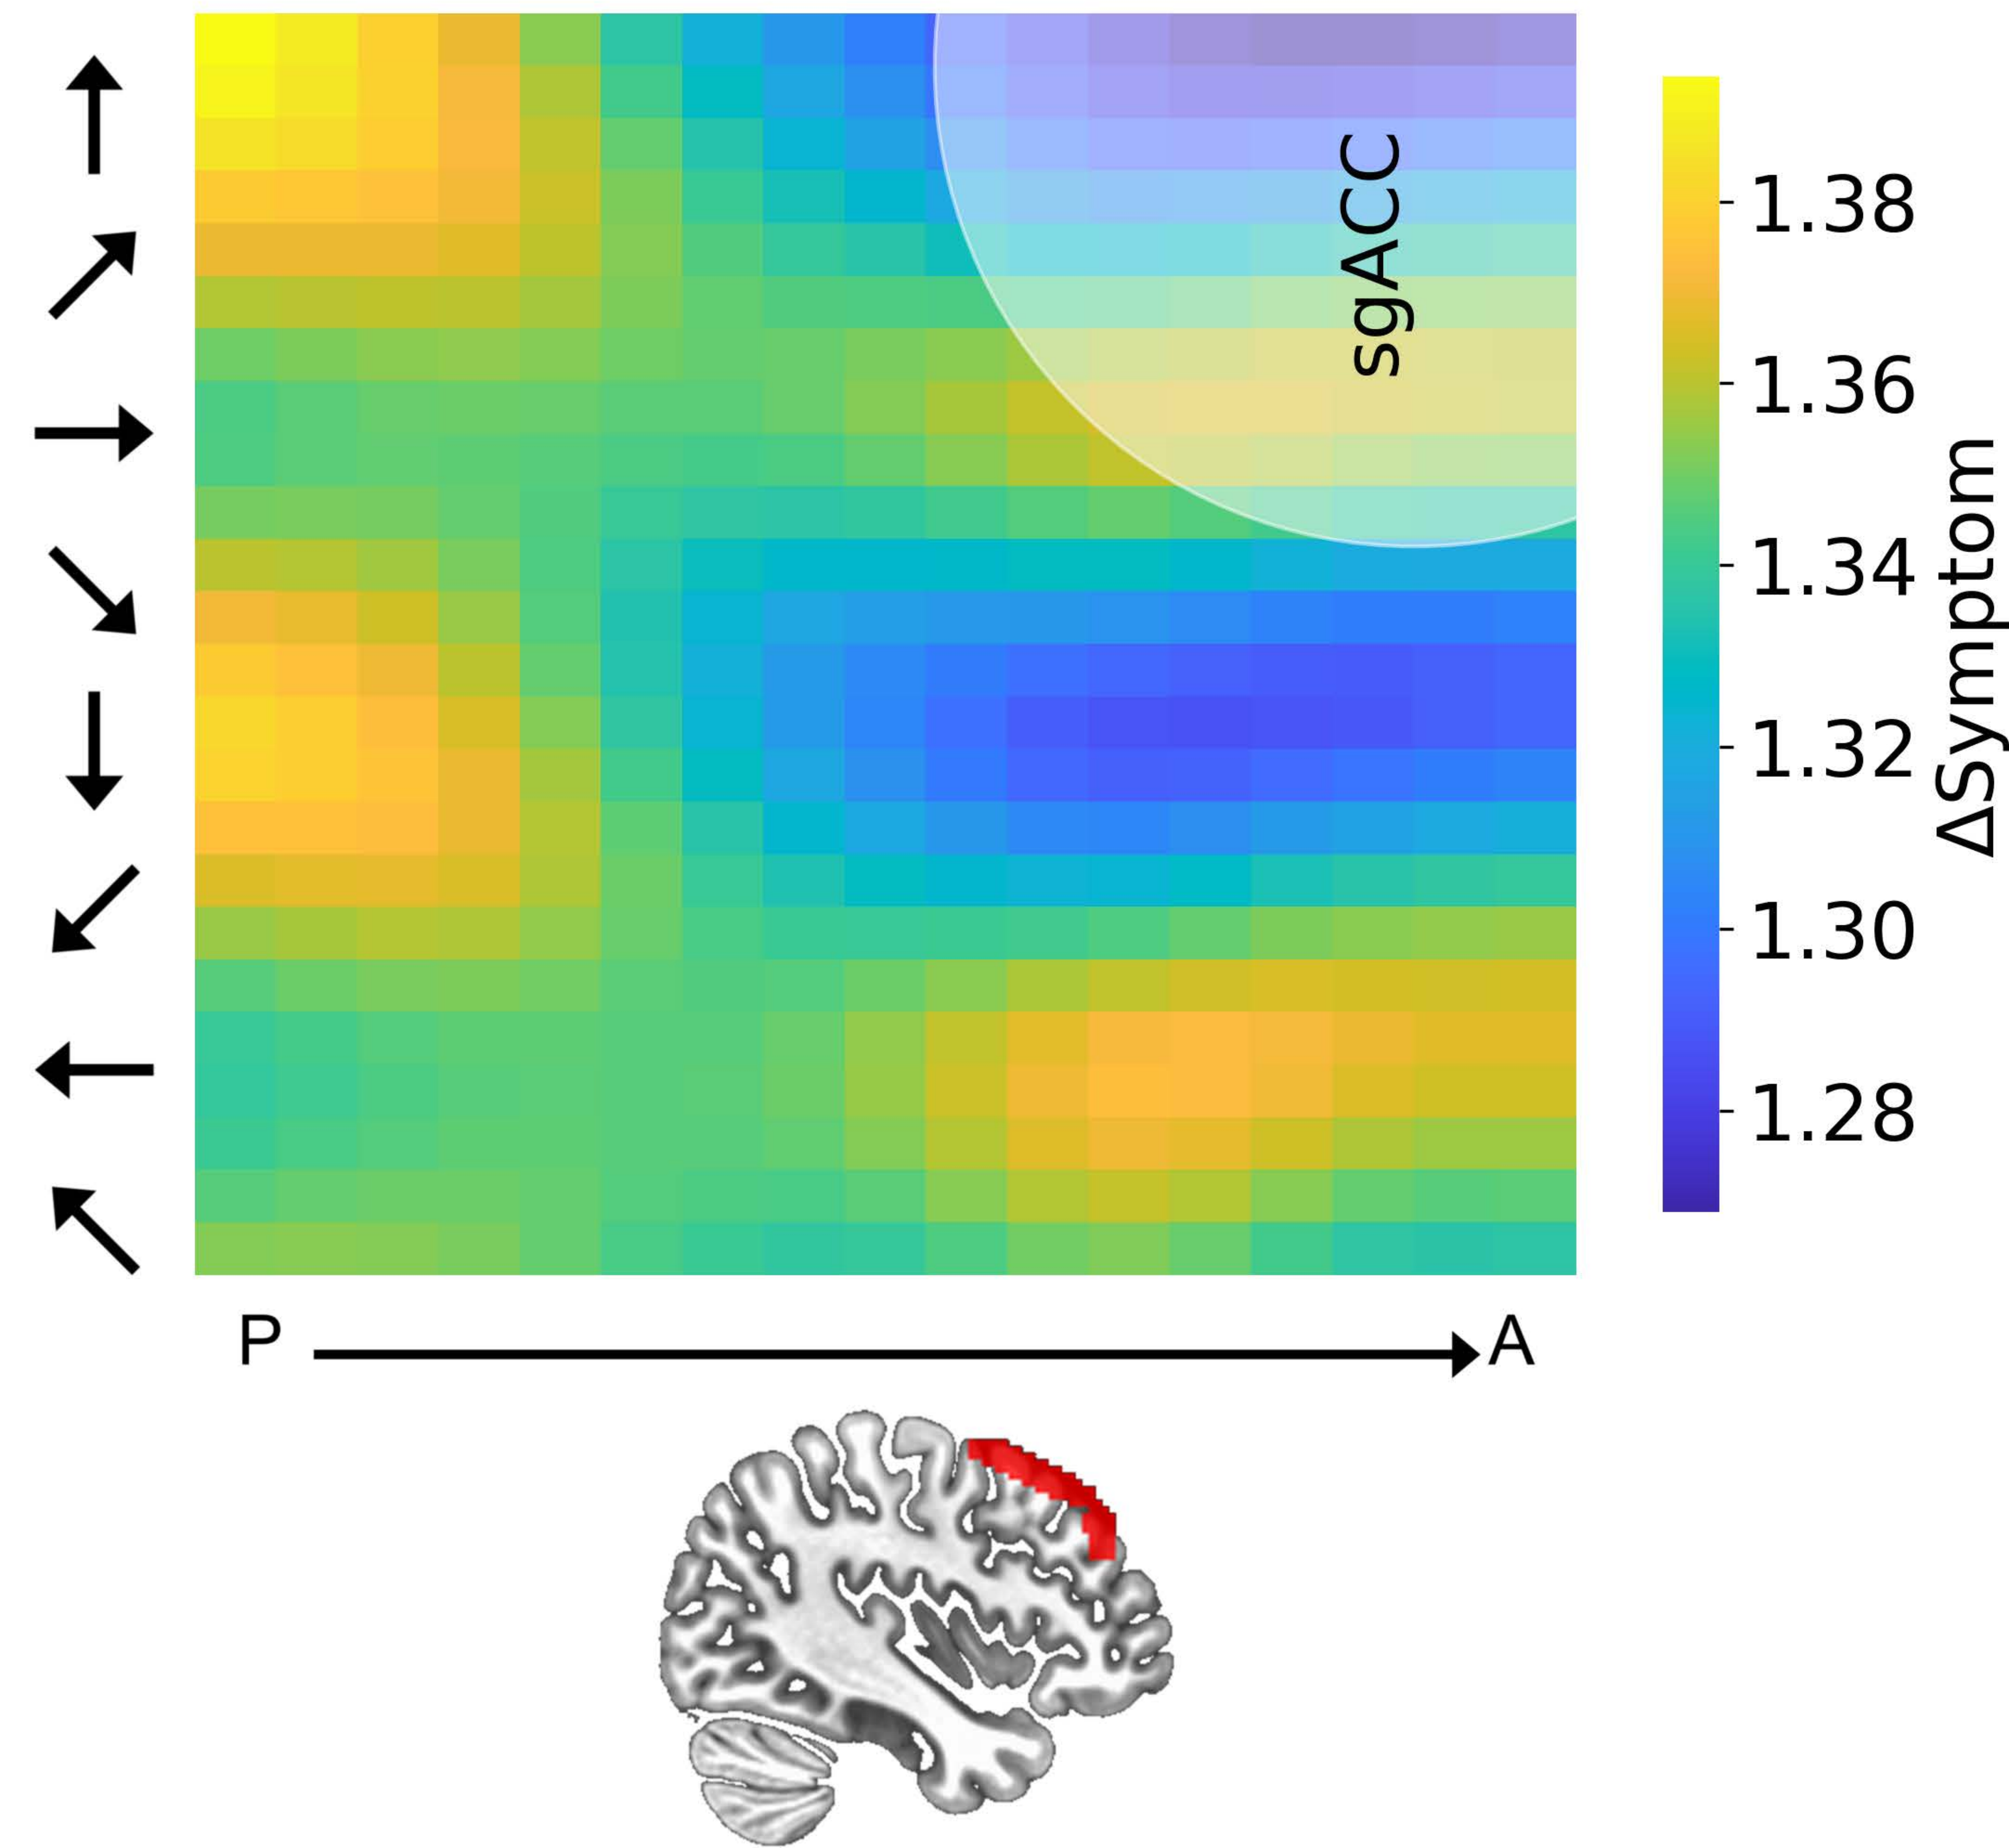



# NDARME497RF8\_hamd\_right\_dlpfc

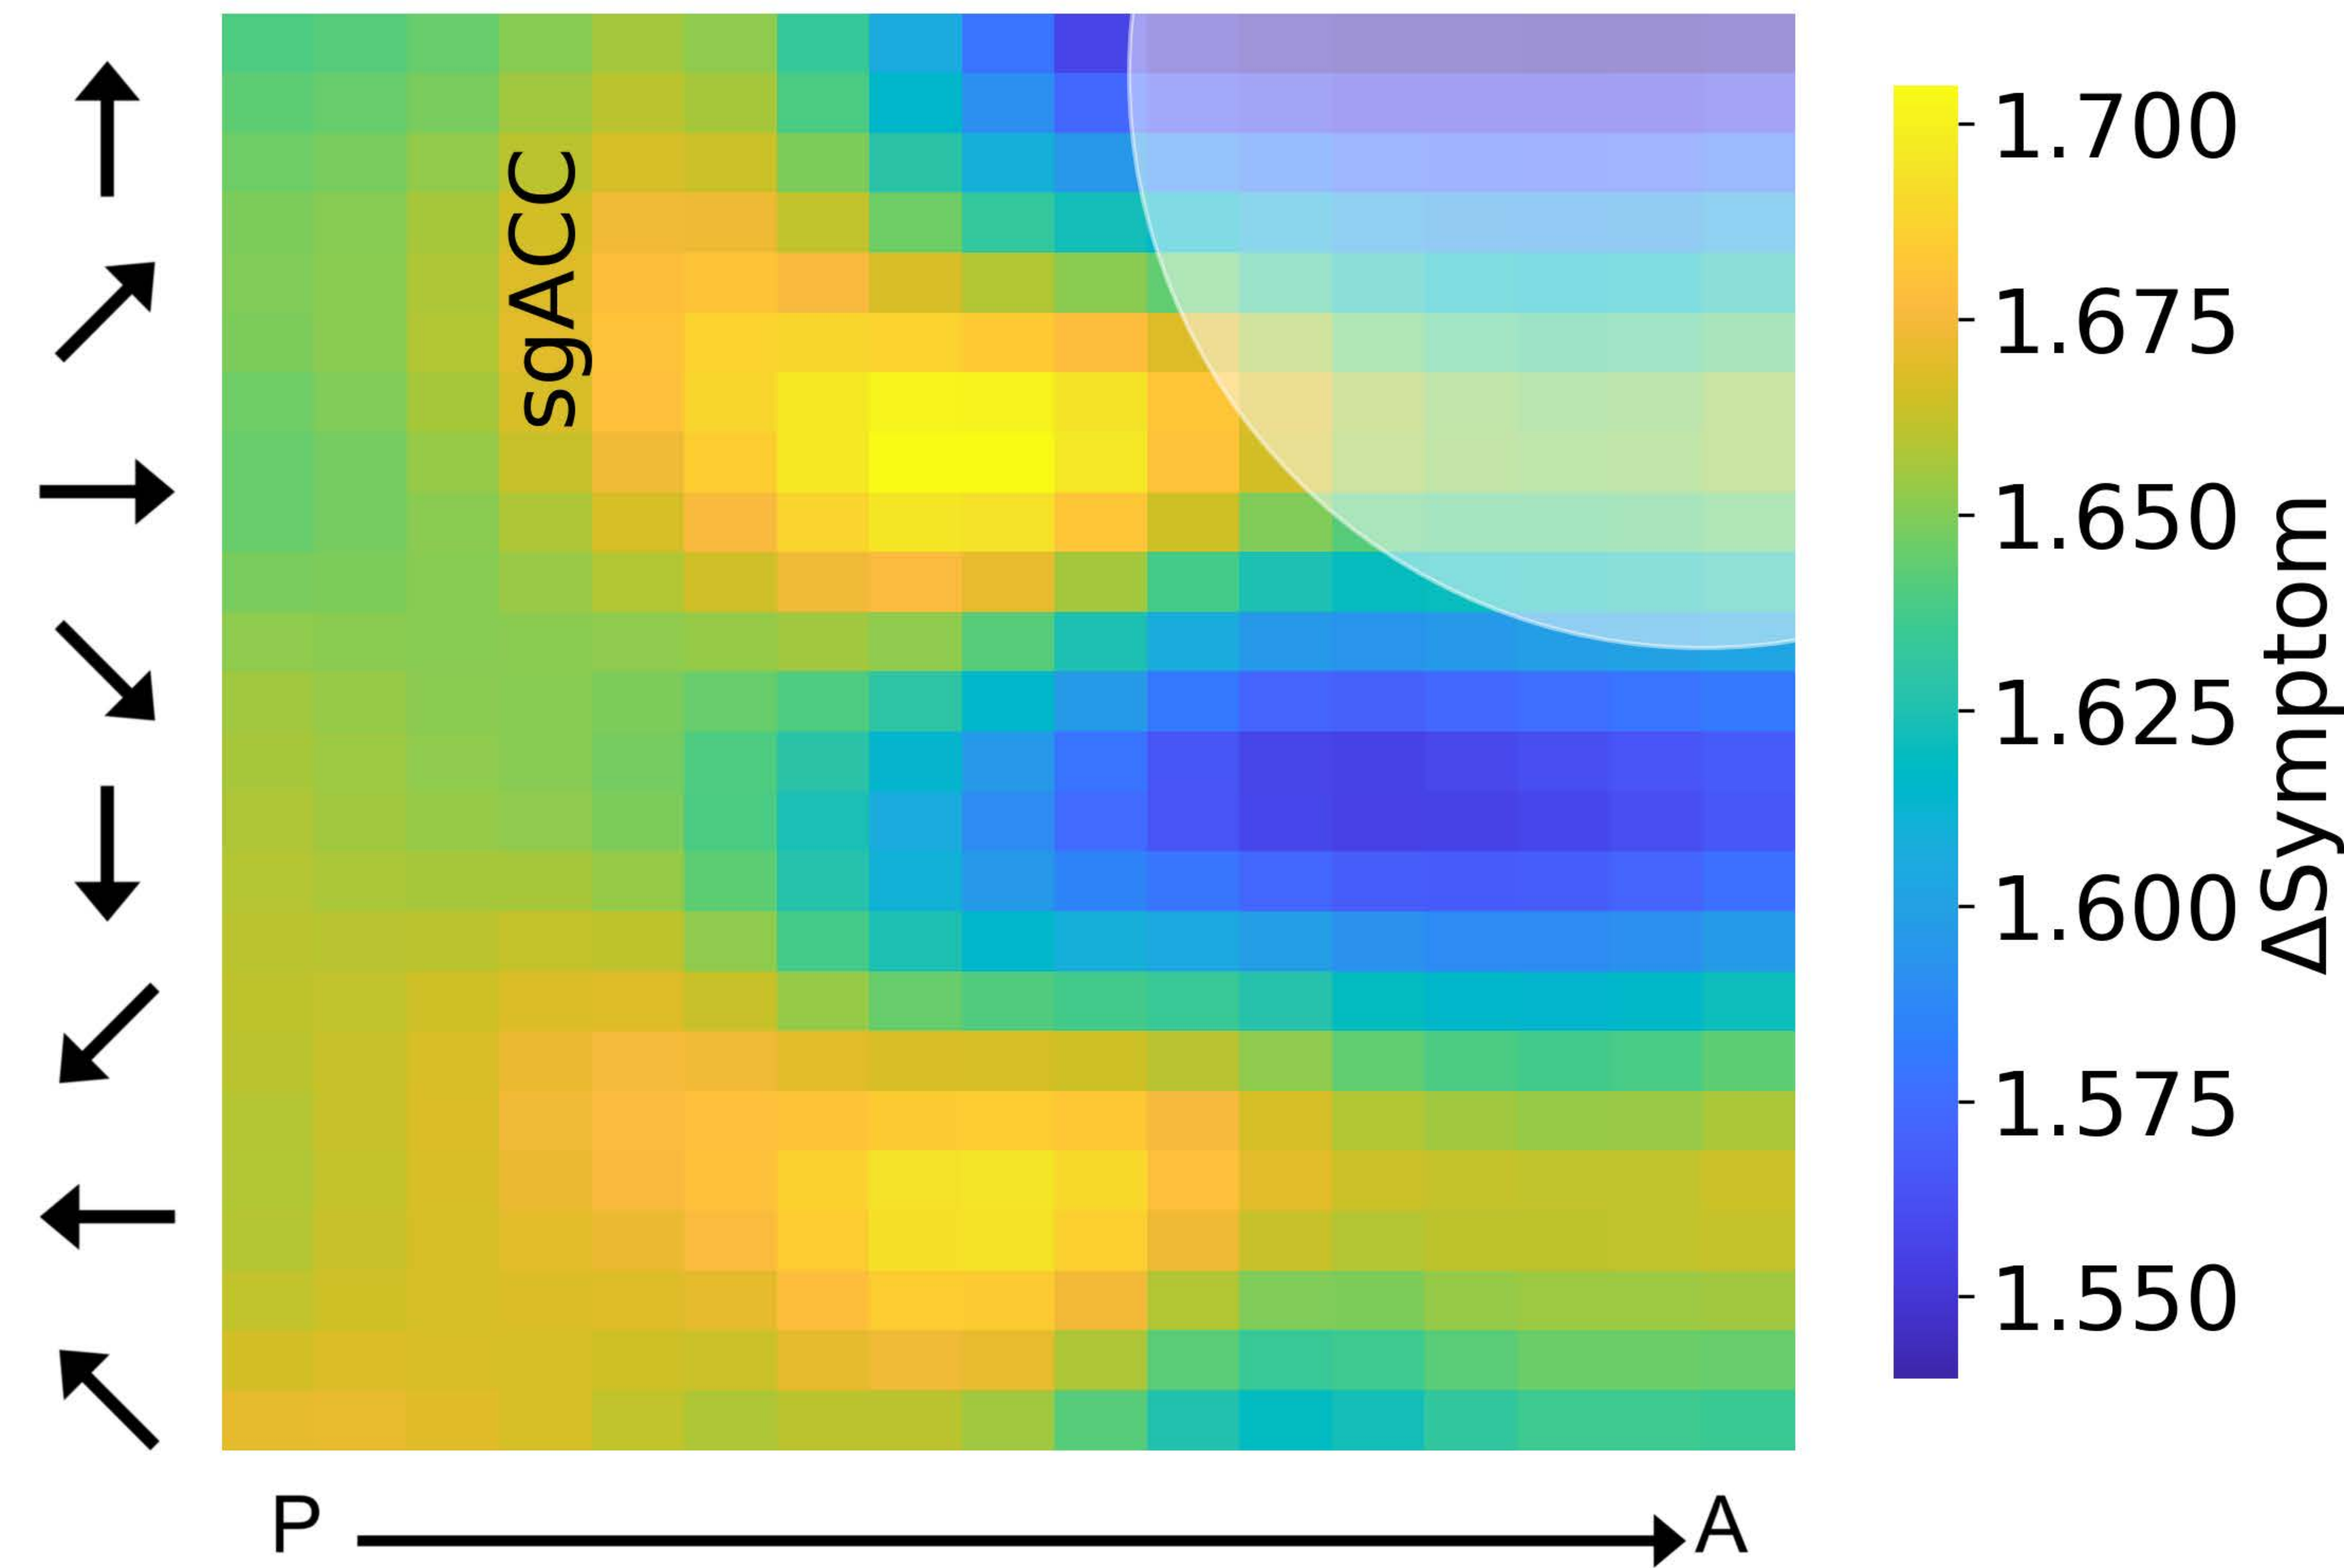



# INDARNJ618KZJ\_hamd\_right\_dlpfc

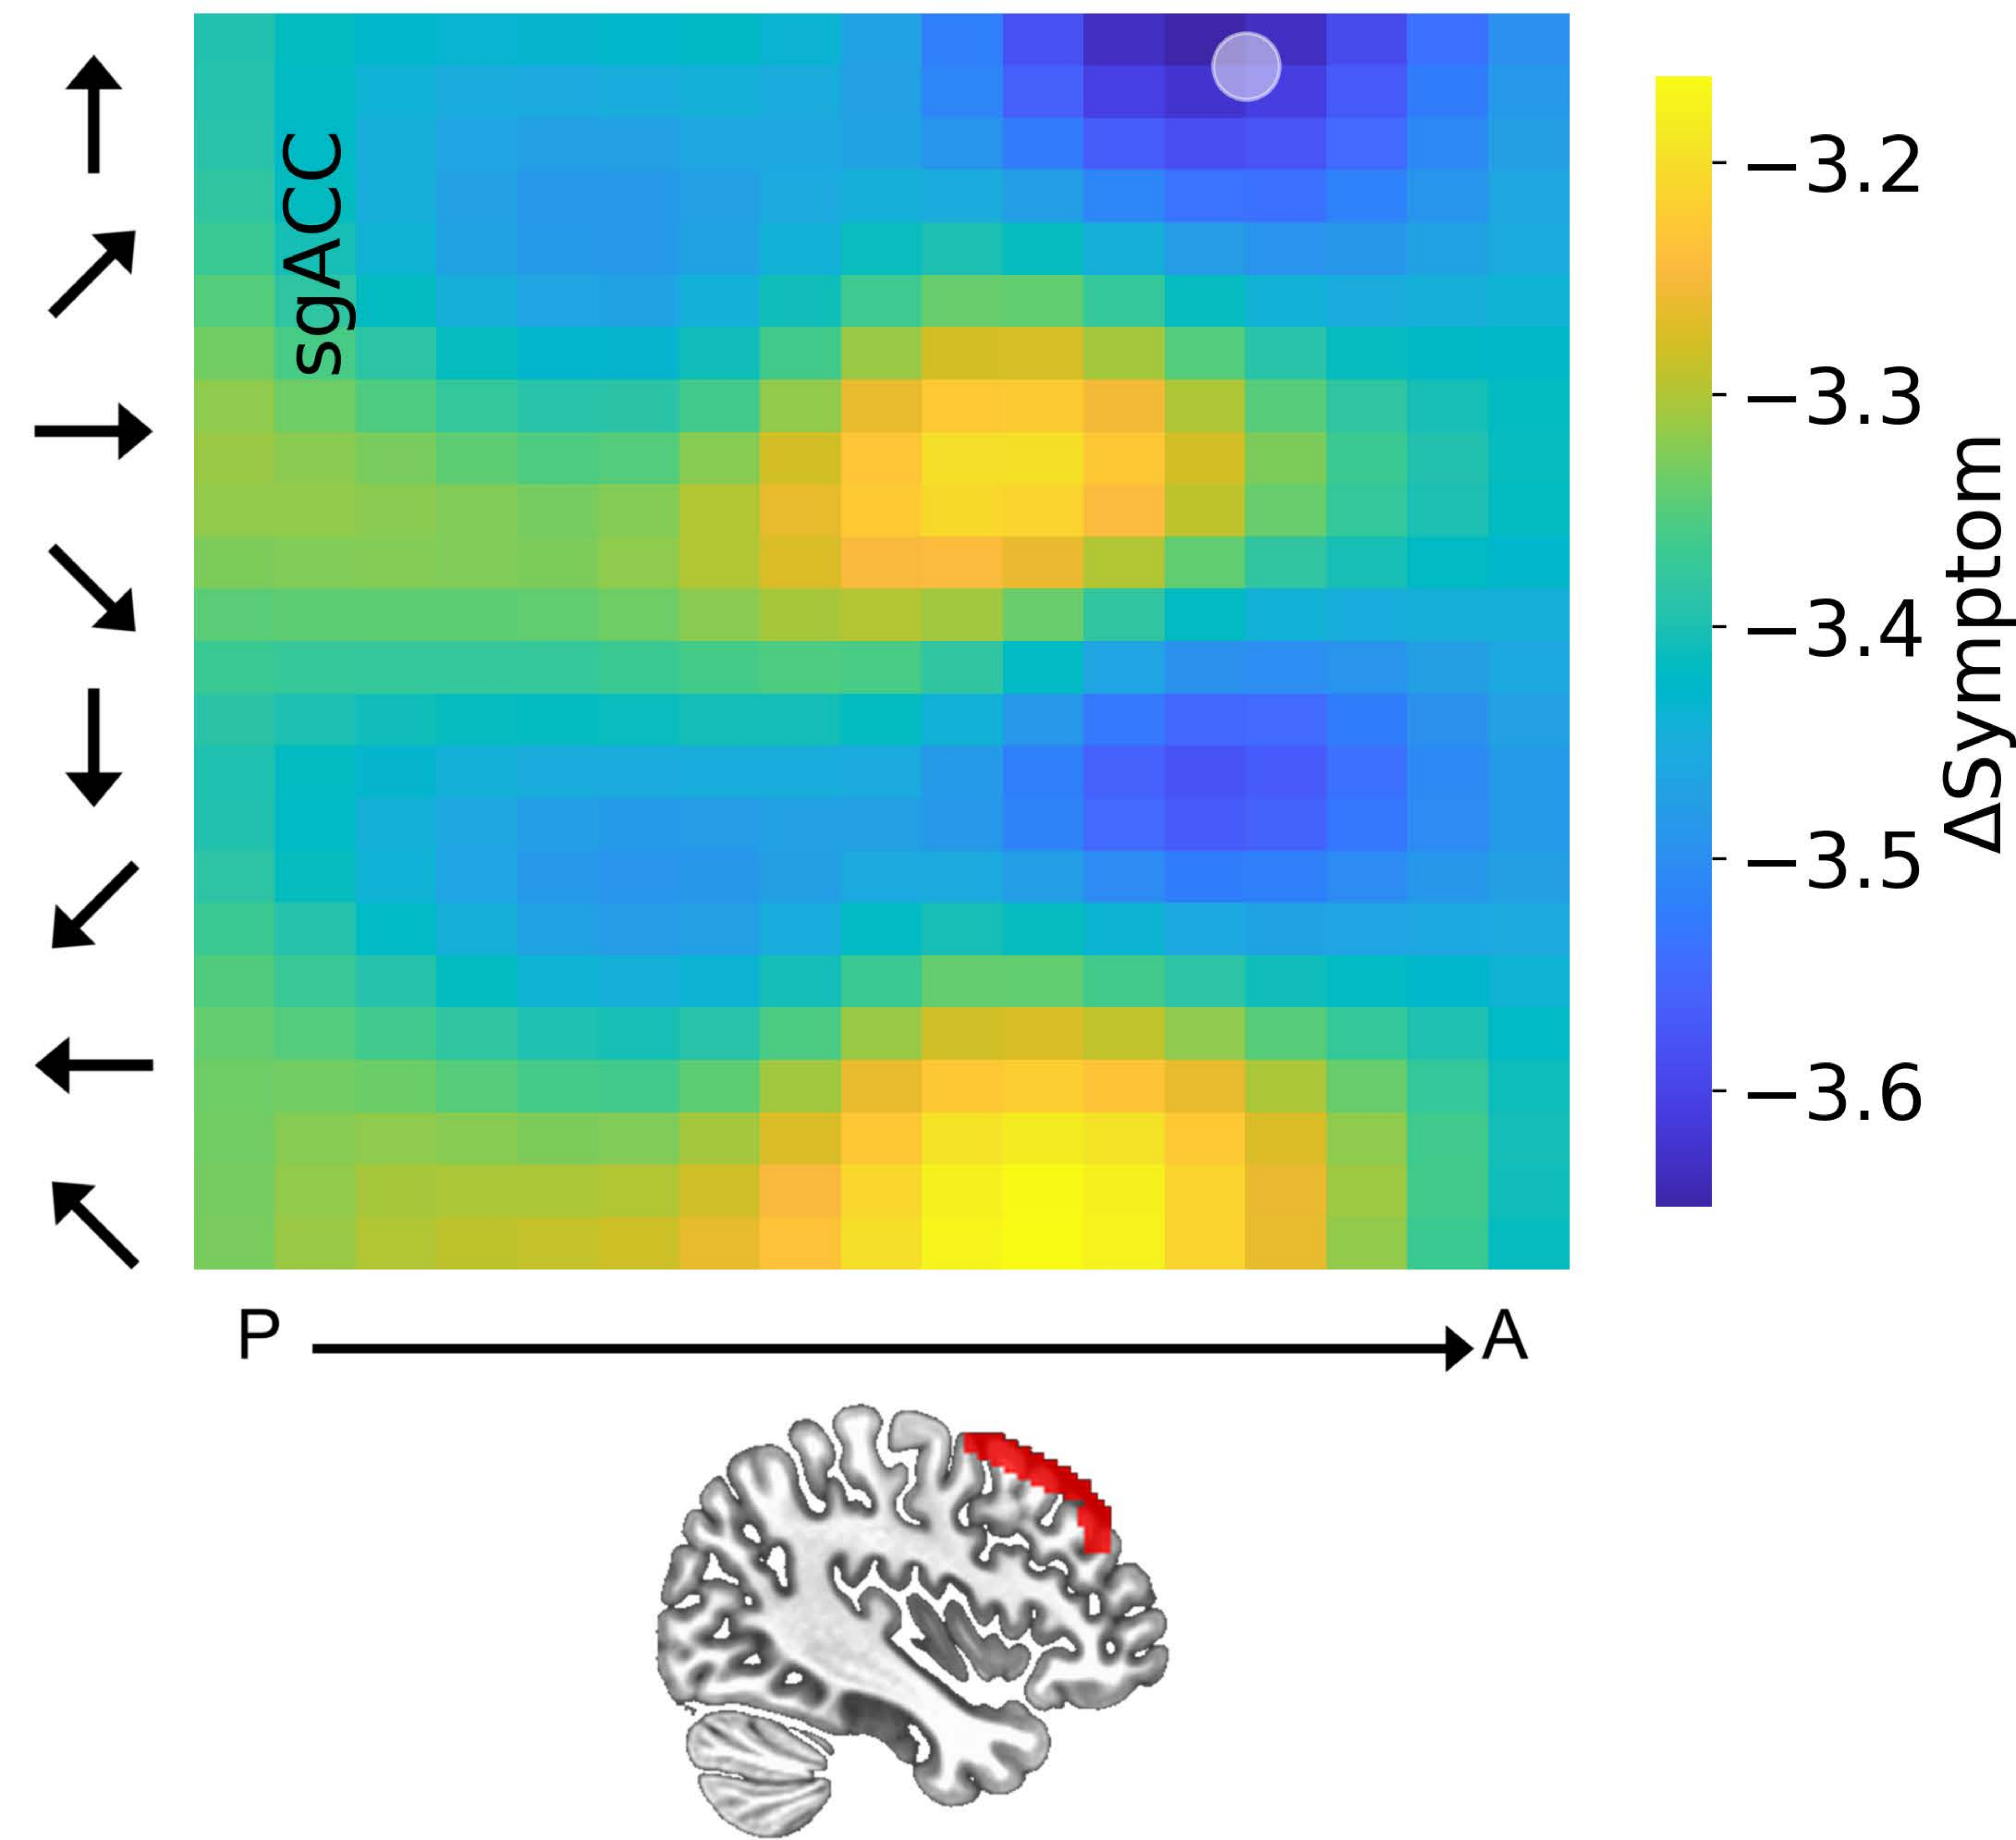



# INDARNL715RTY\_hamd\_right\_dlpfc

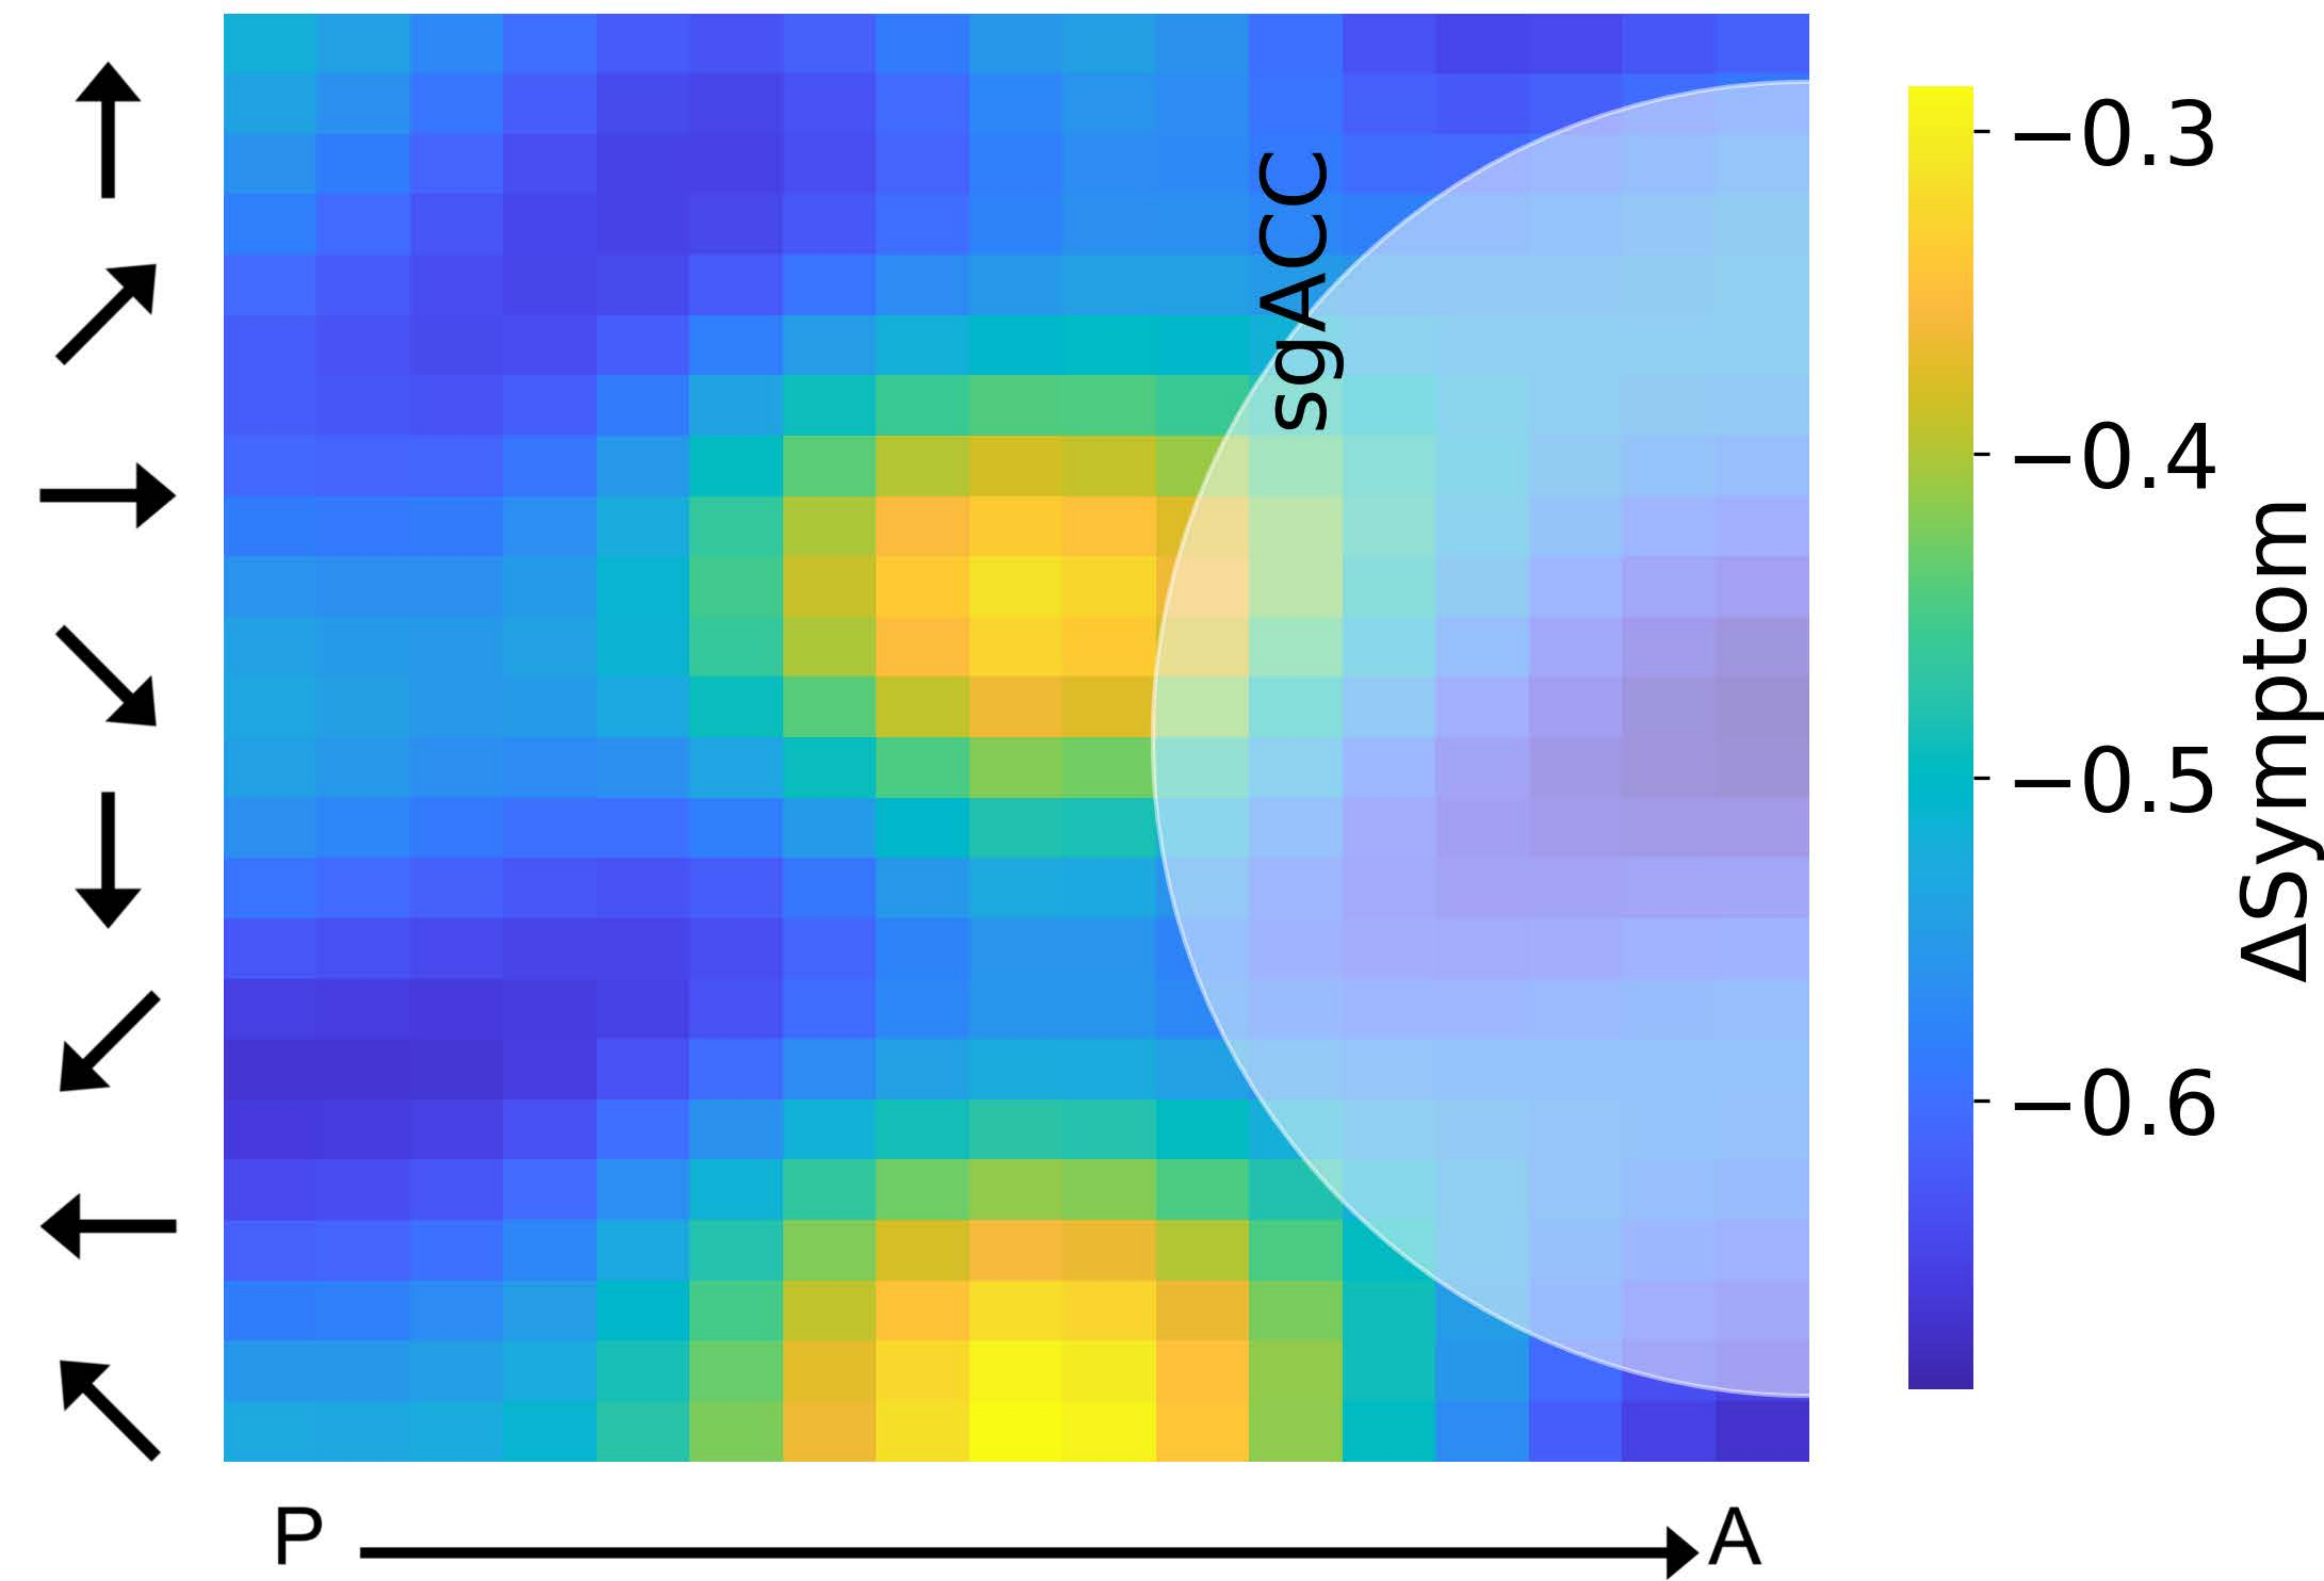



# NDARPK532CVC\_hamd\_right\_dlpfc

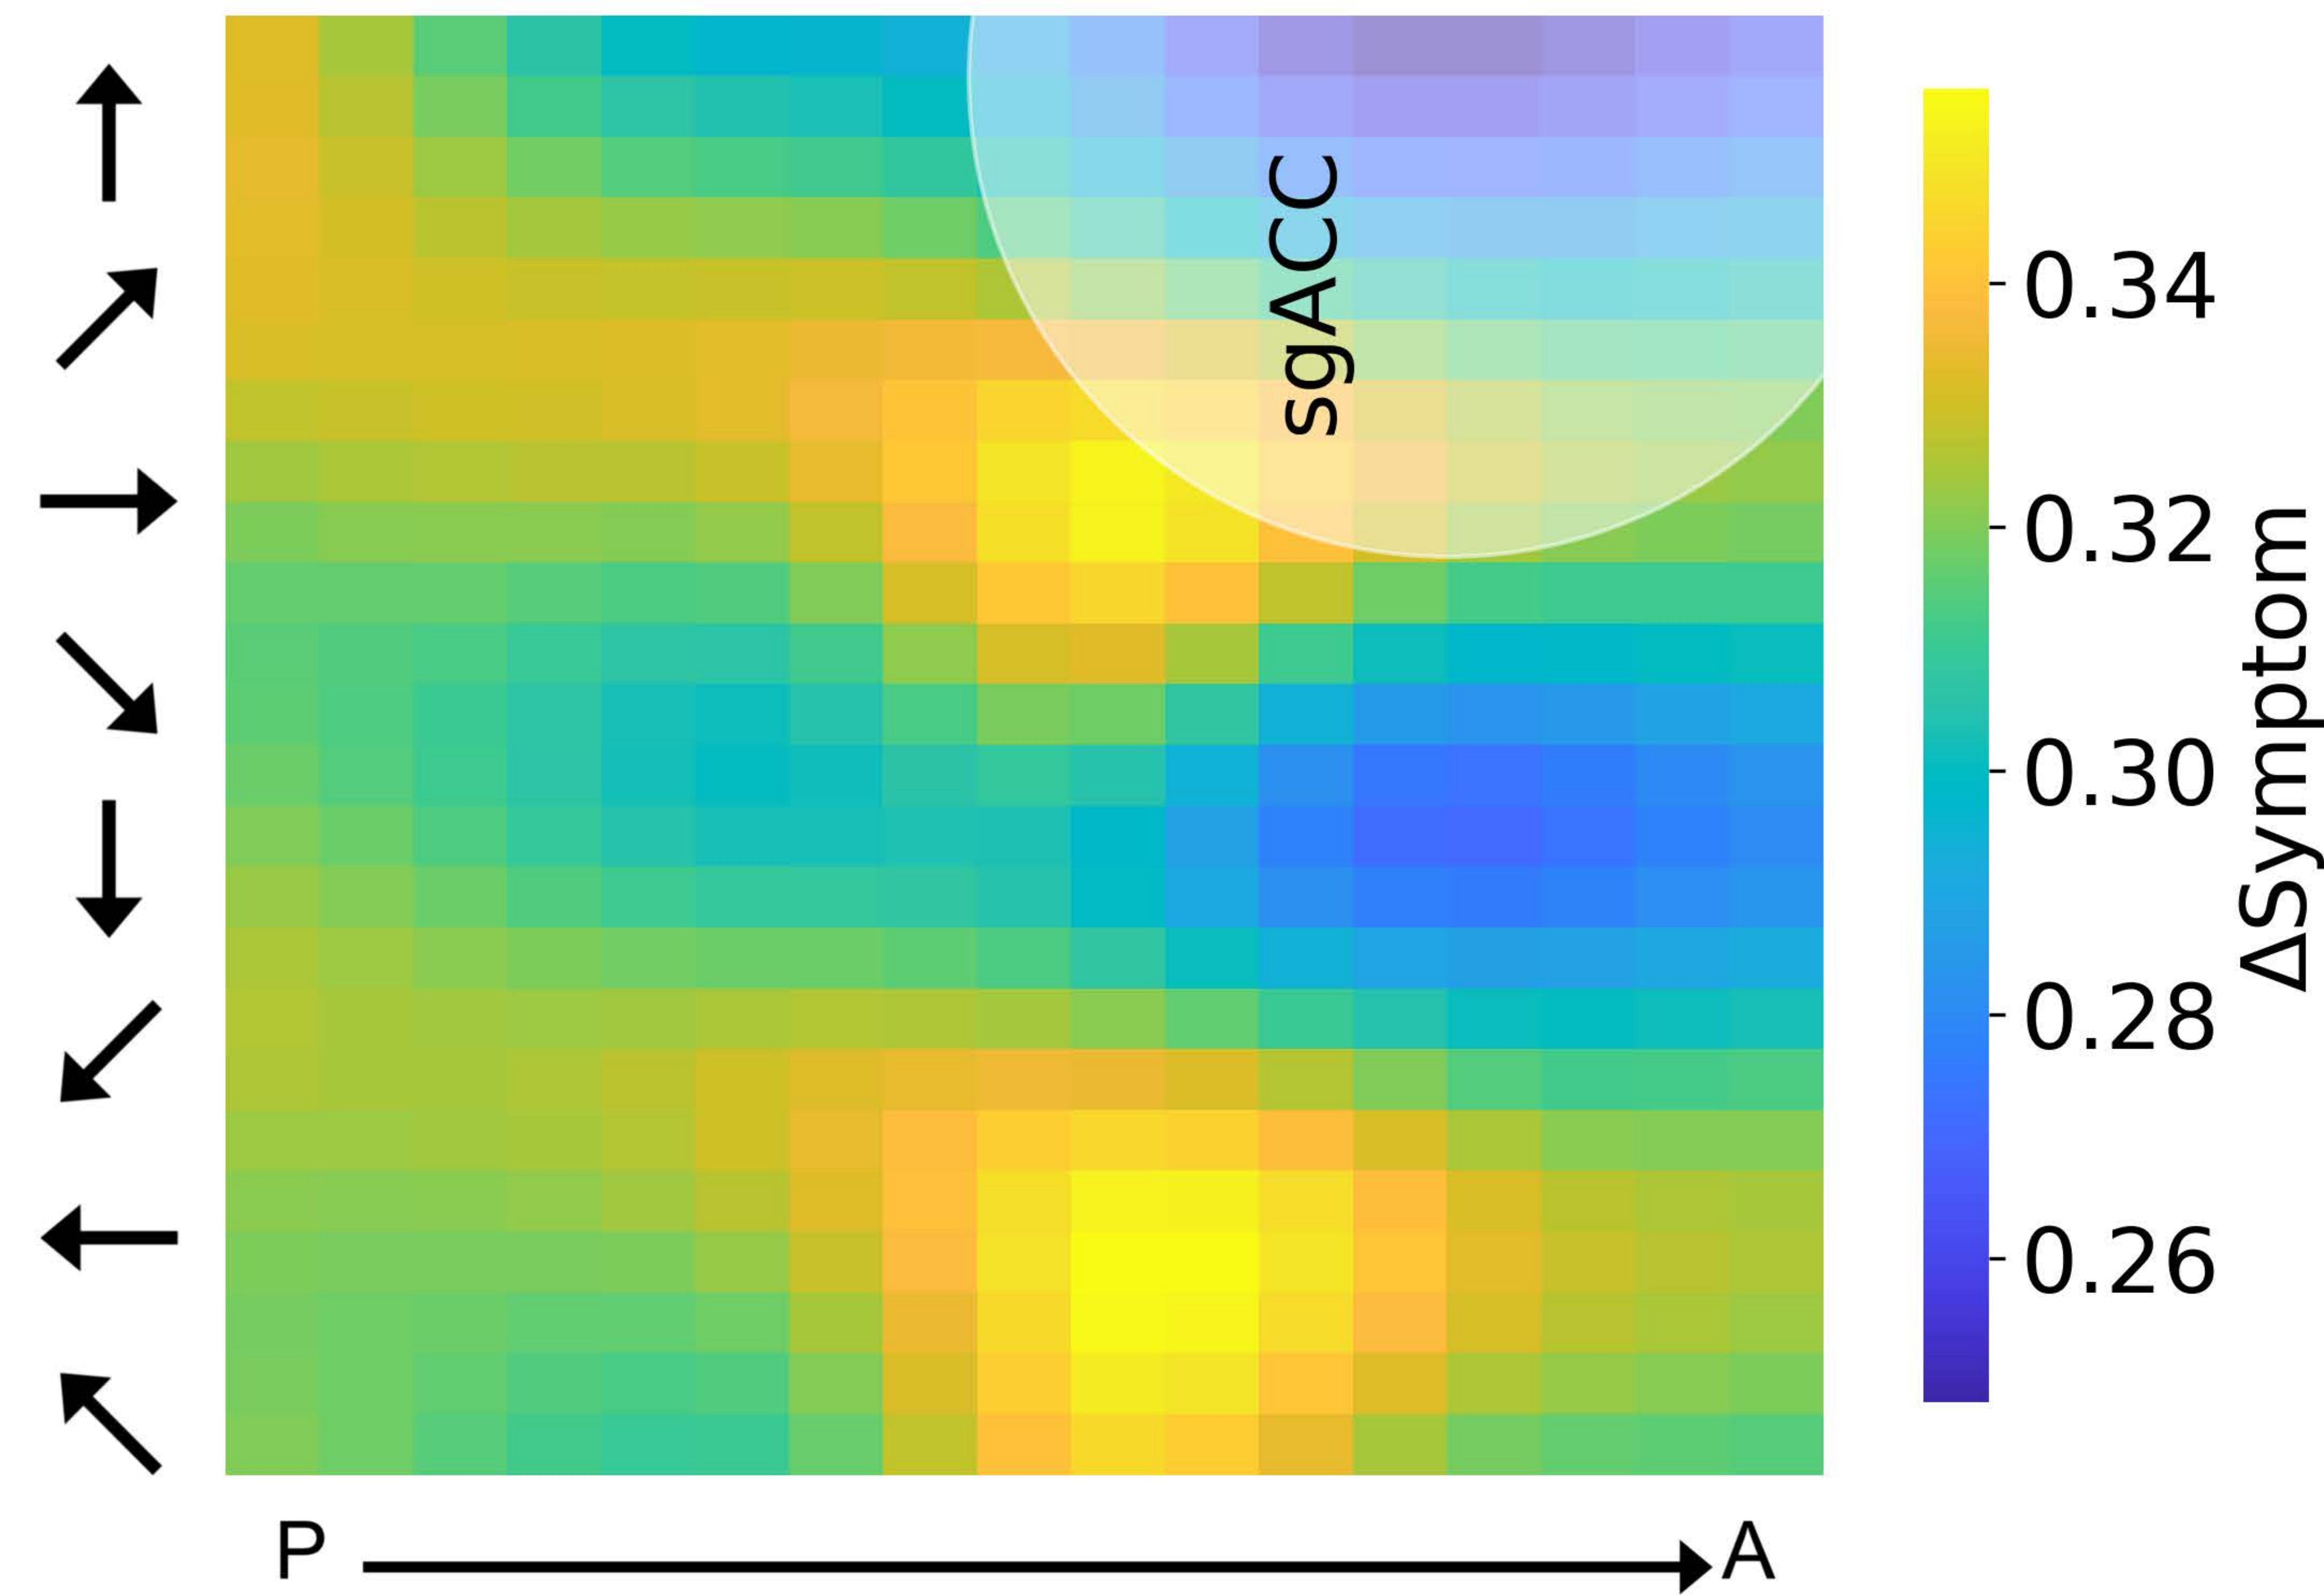



# INDARWK858FA2\_hamd\_right\_dlpfc

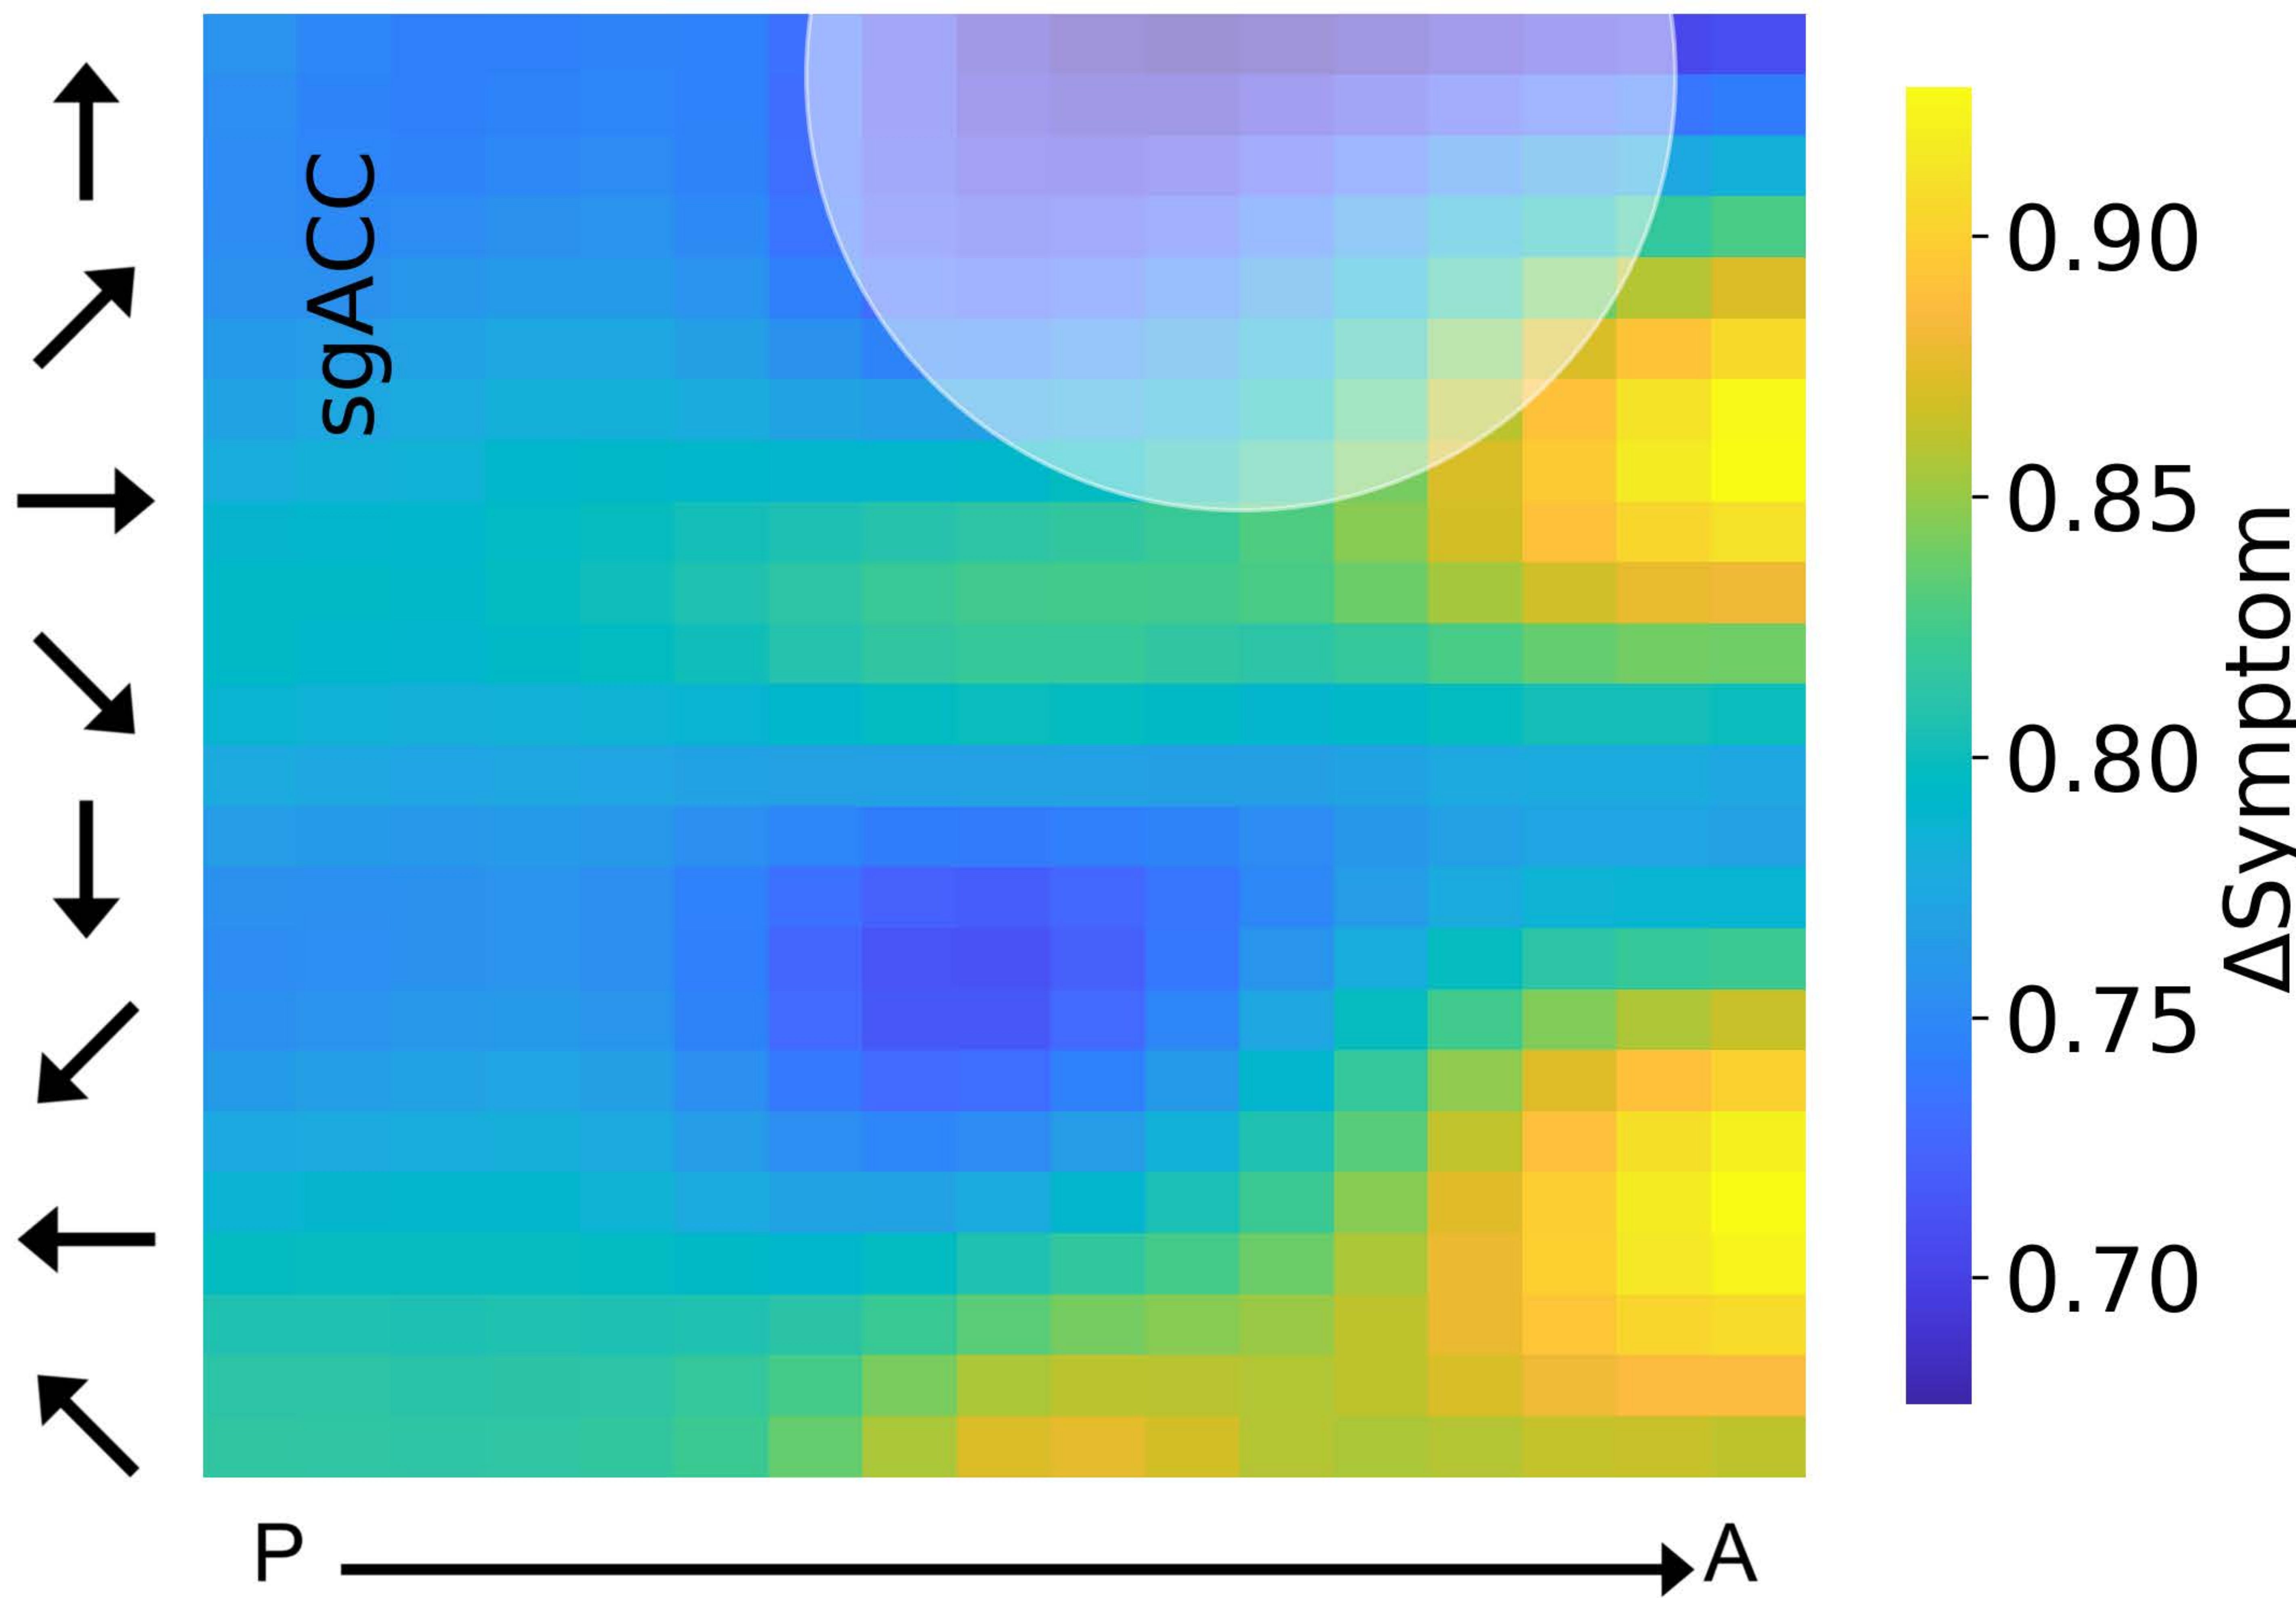



# INDARWMM071DRZ\_hamd\_right\_dlpfc

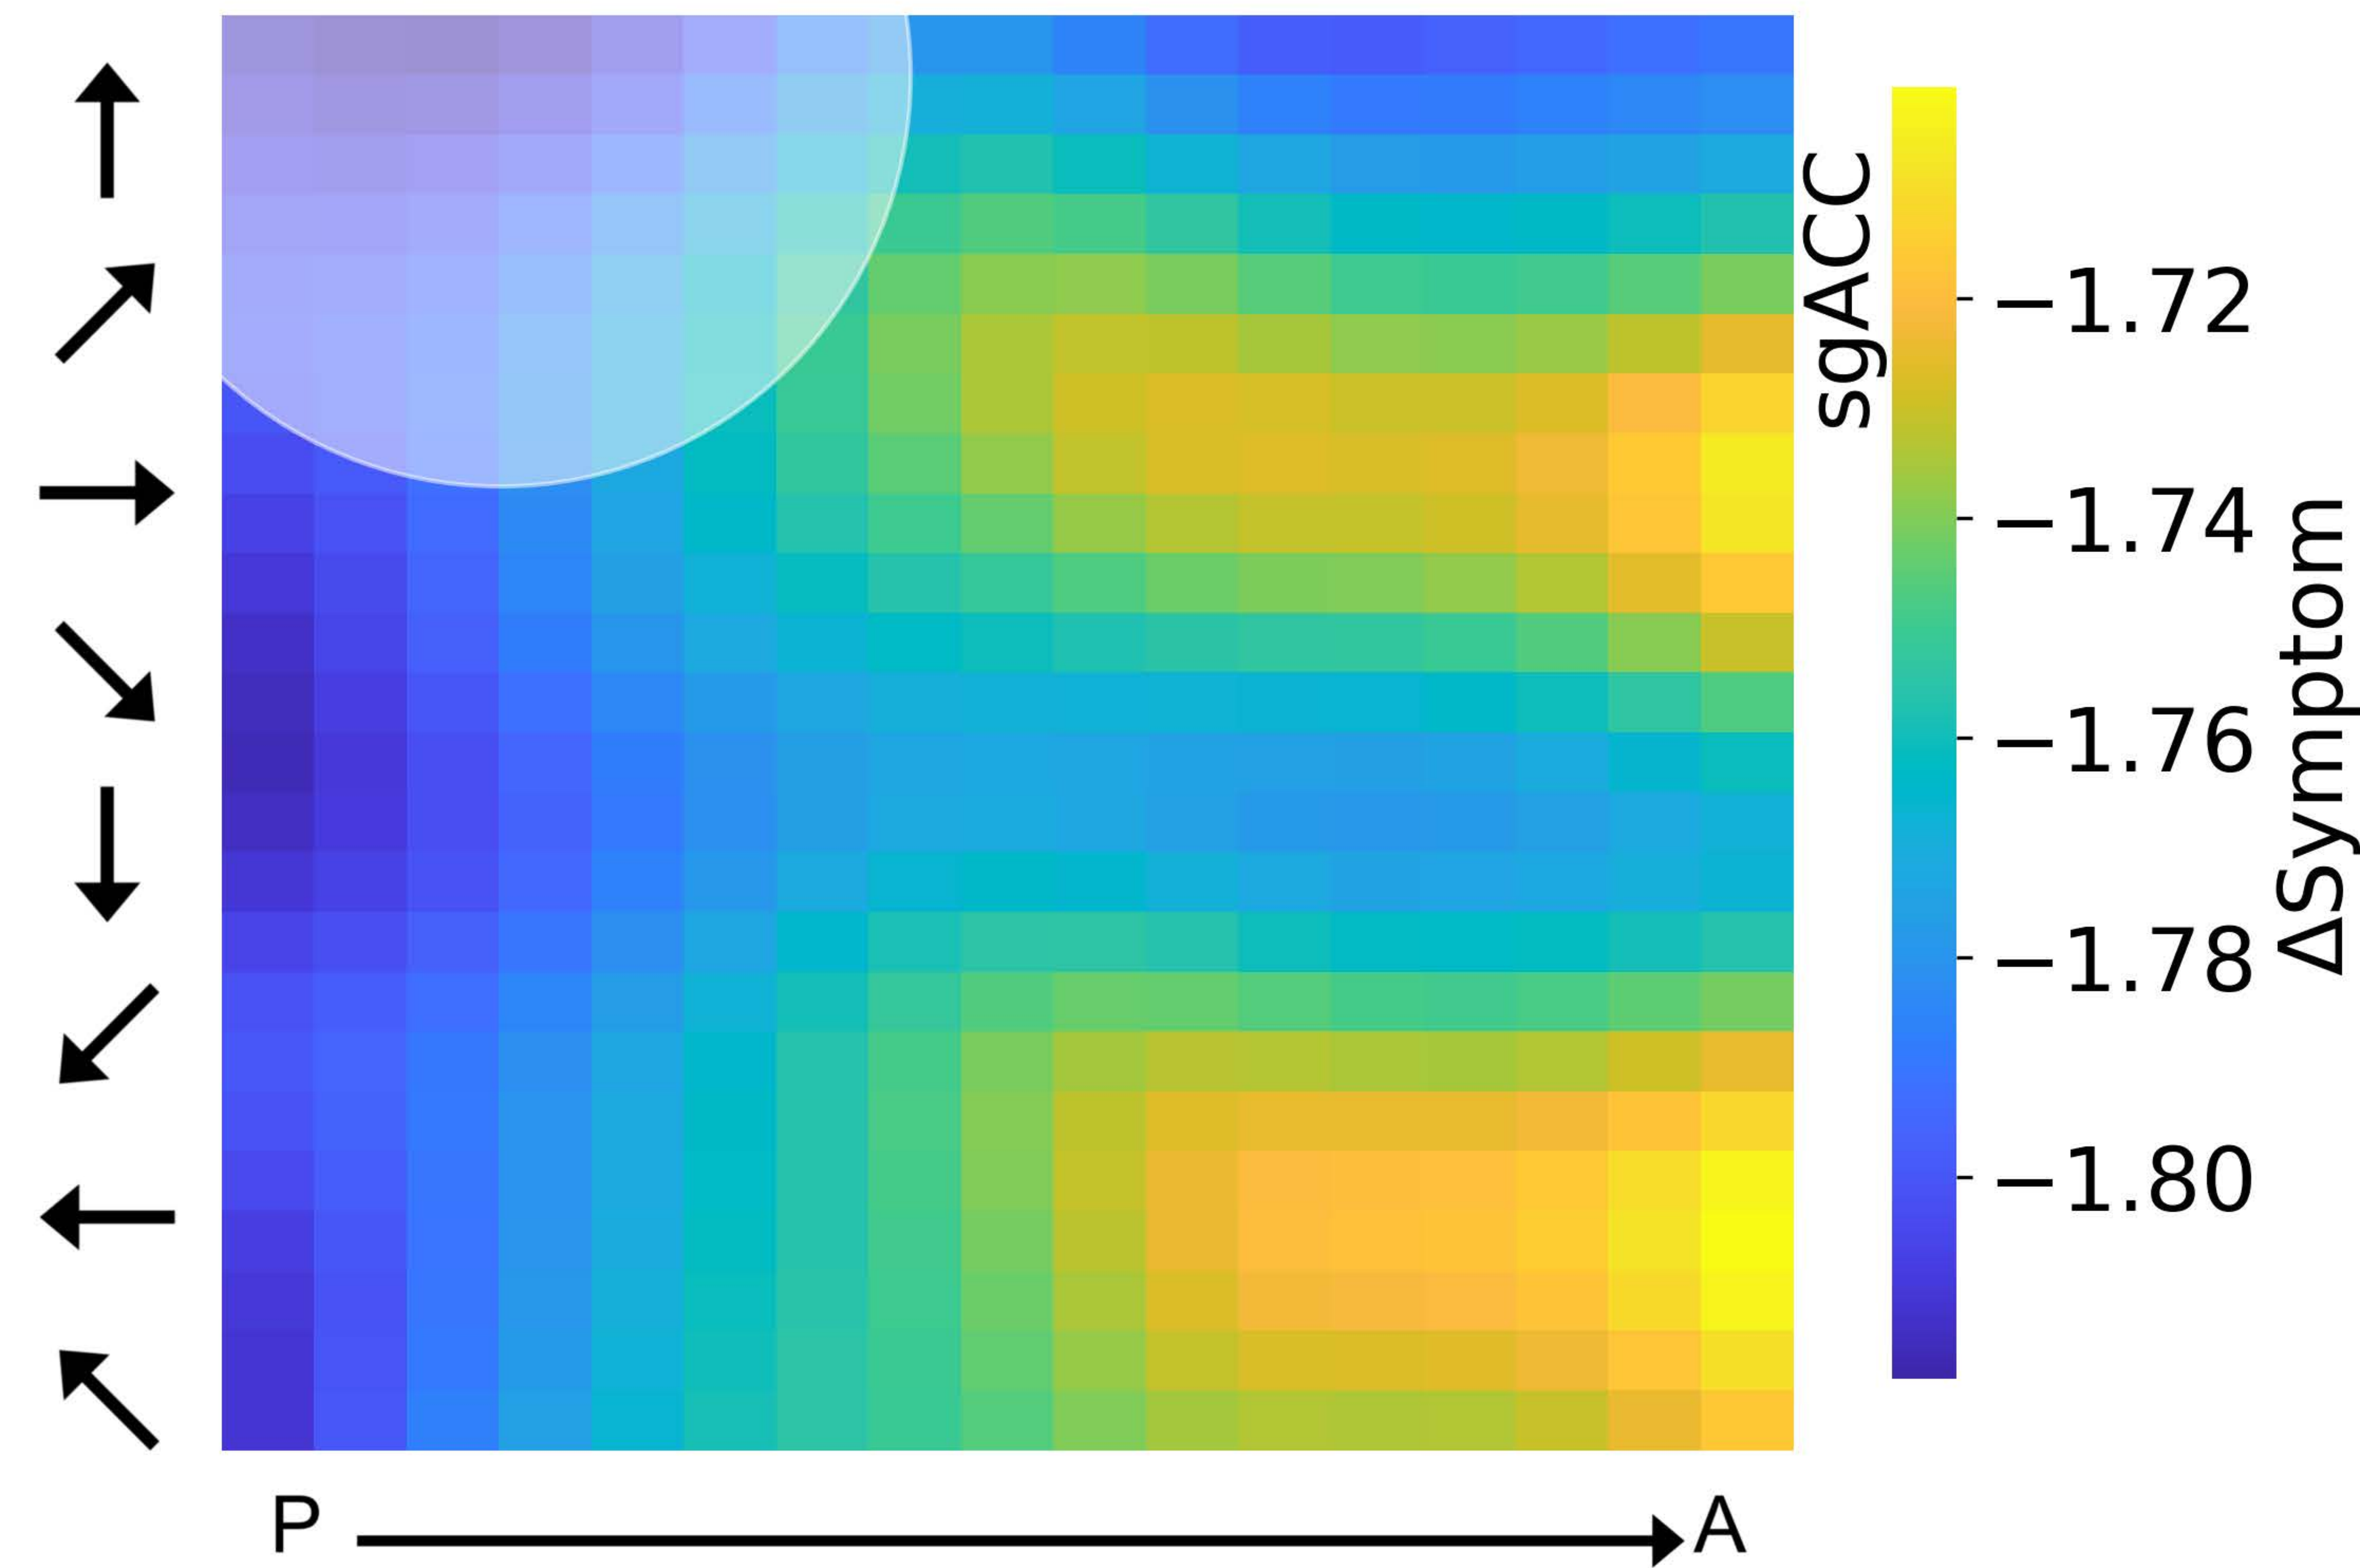



# INDARWT226PU5\_hamd\_right\_dlpfc

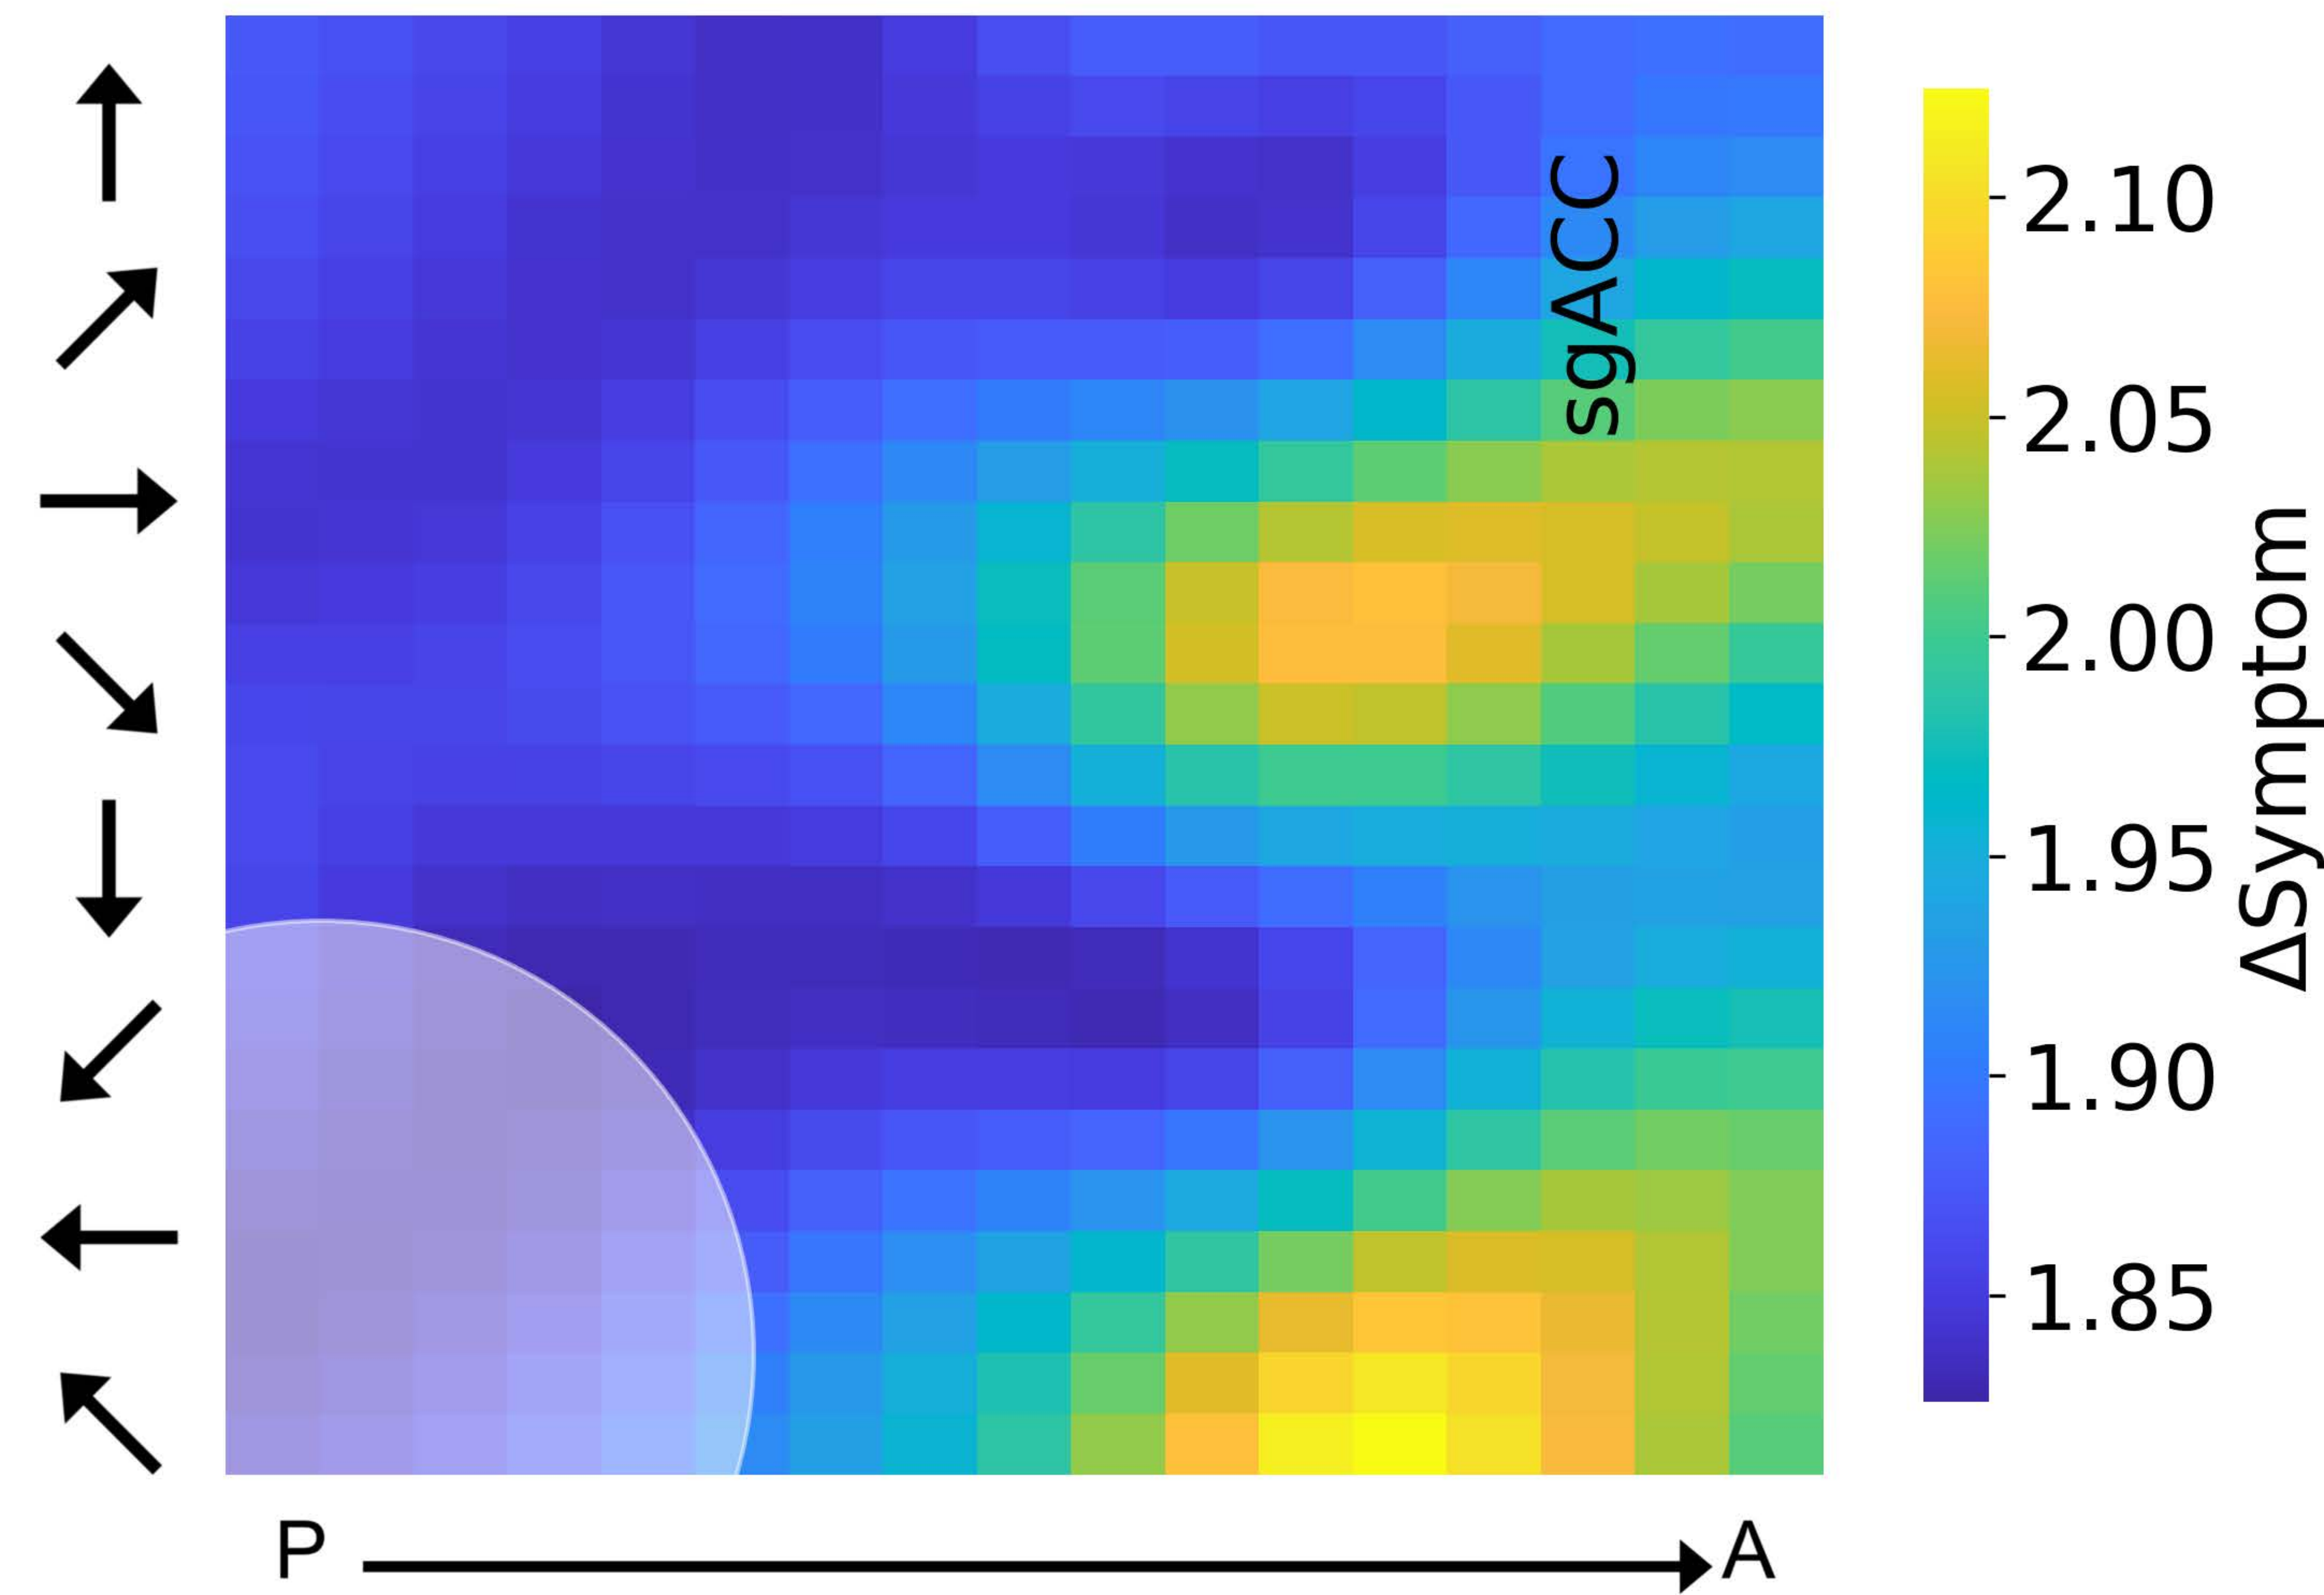



# INDARWU139LAY\_hamd\_right\_dlpfc

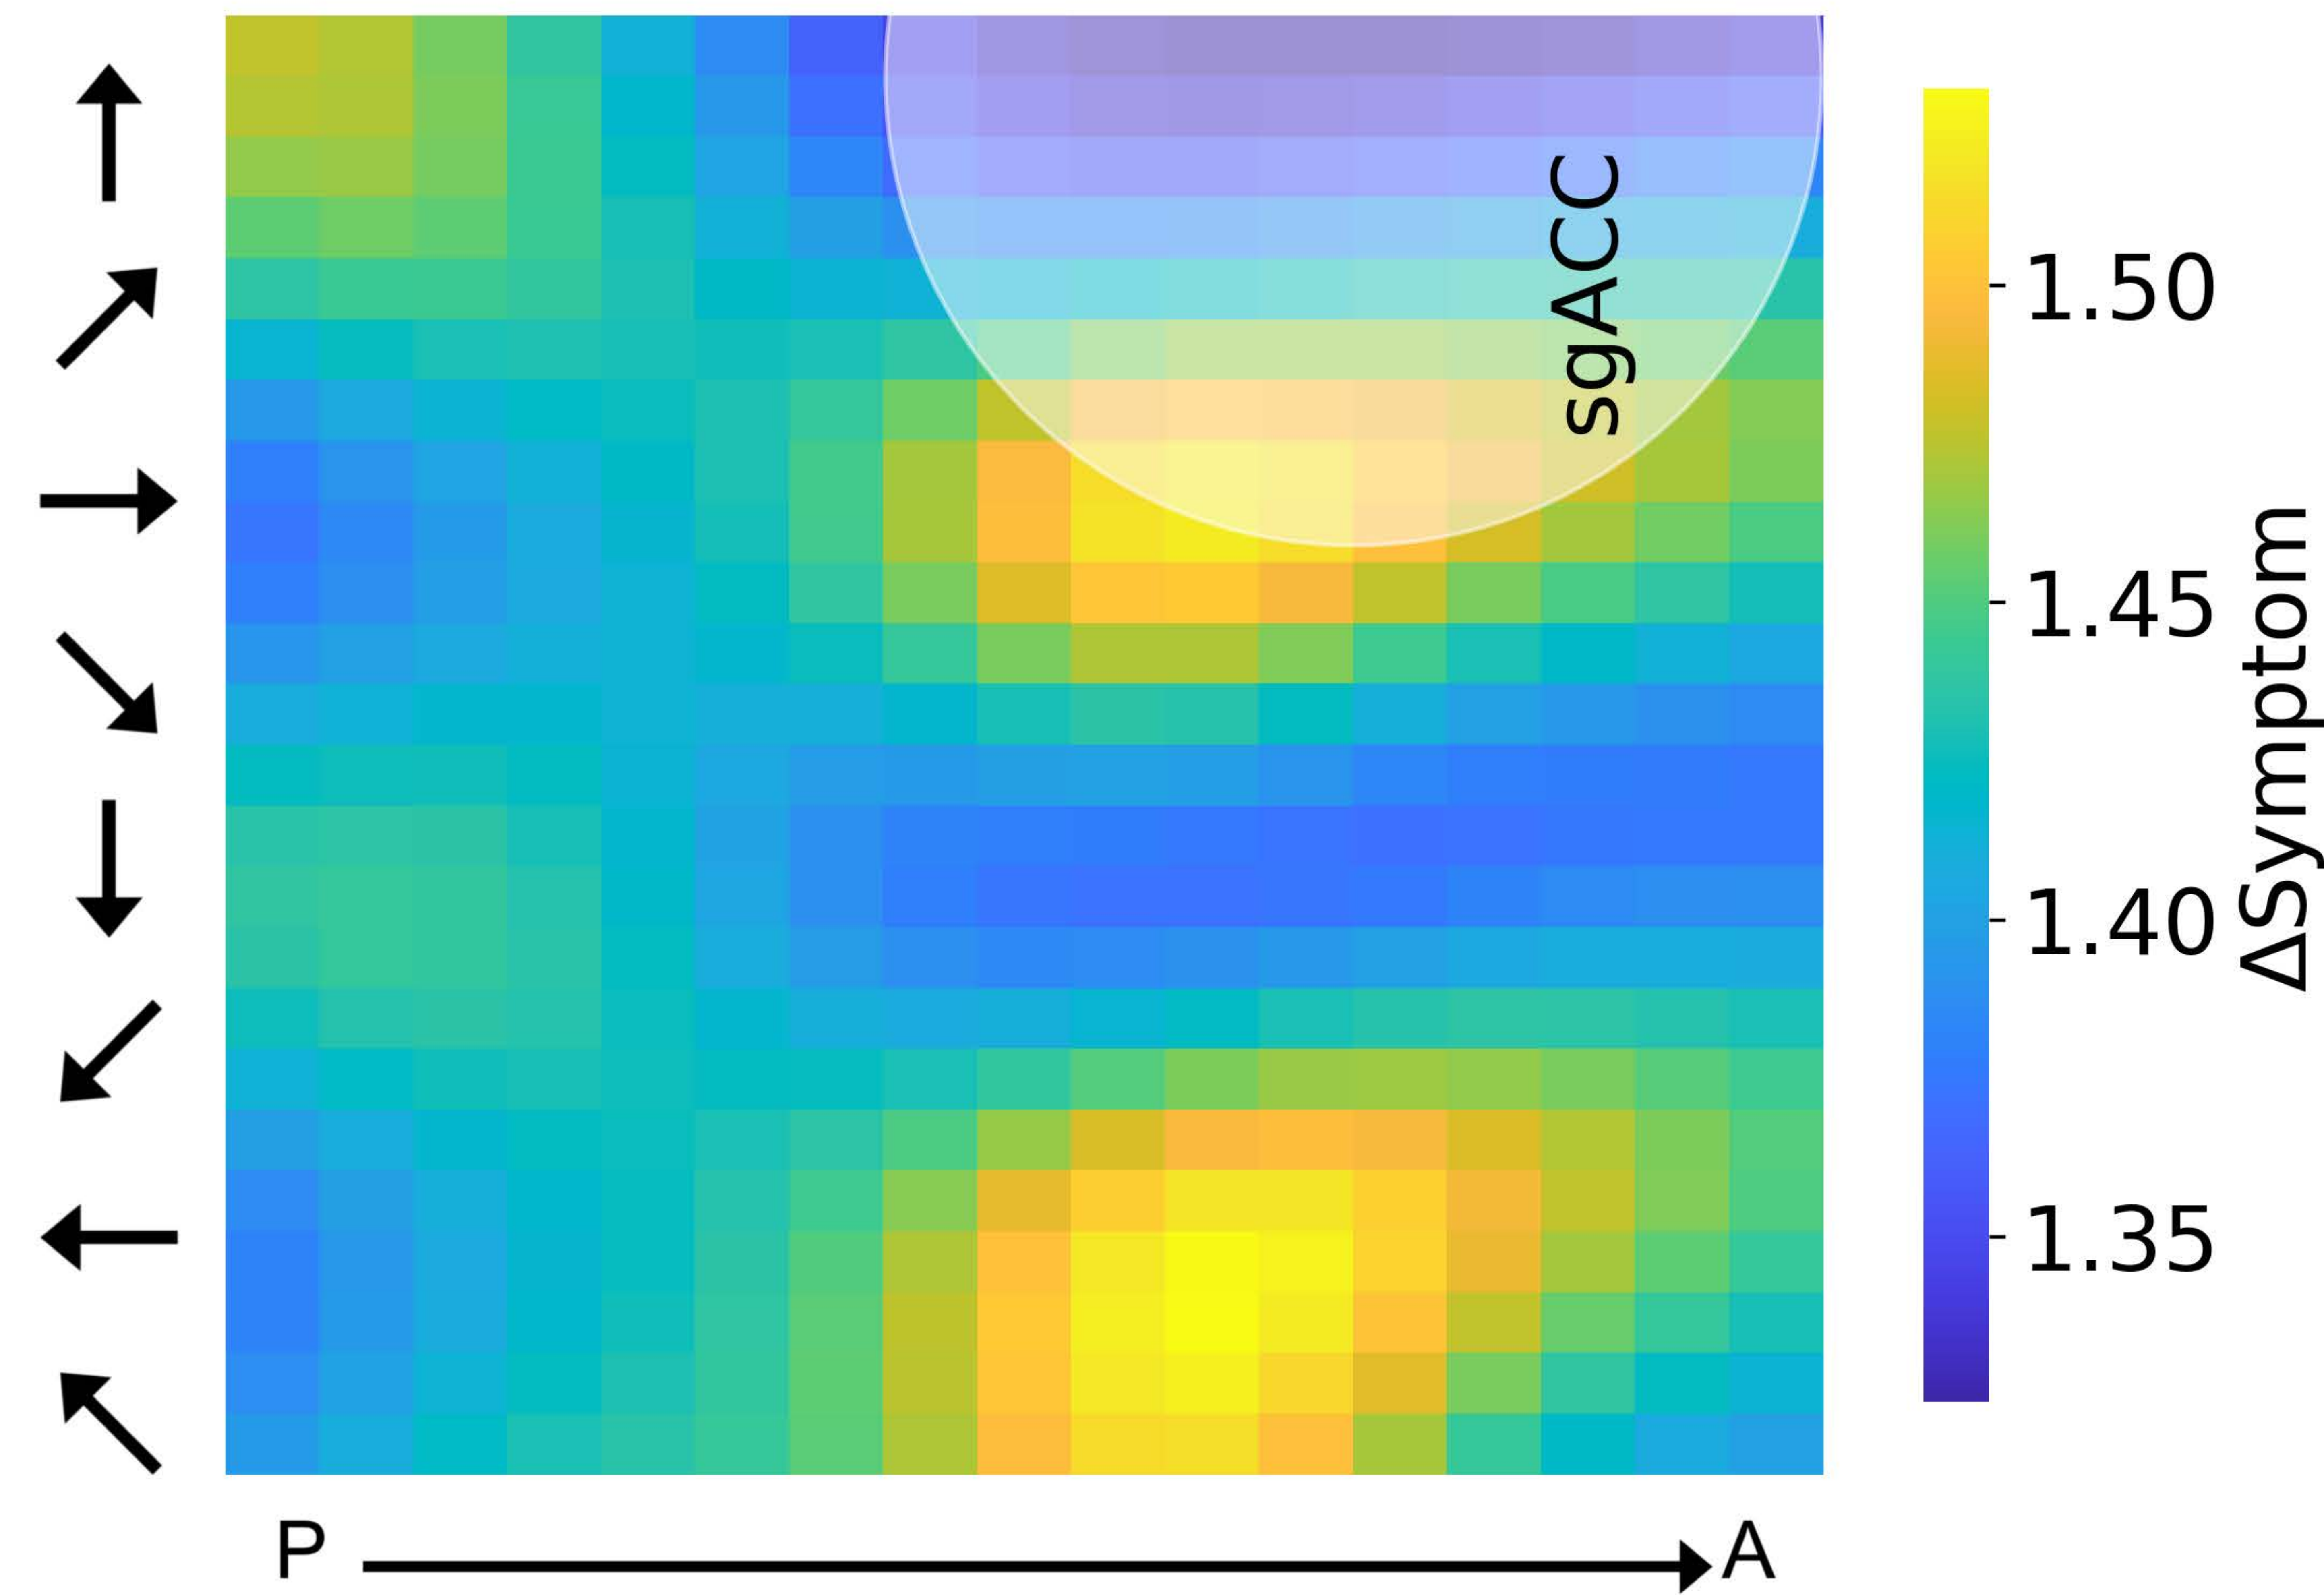



# NDARXH480BBY\_hamd\_right\_dlpfc

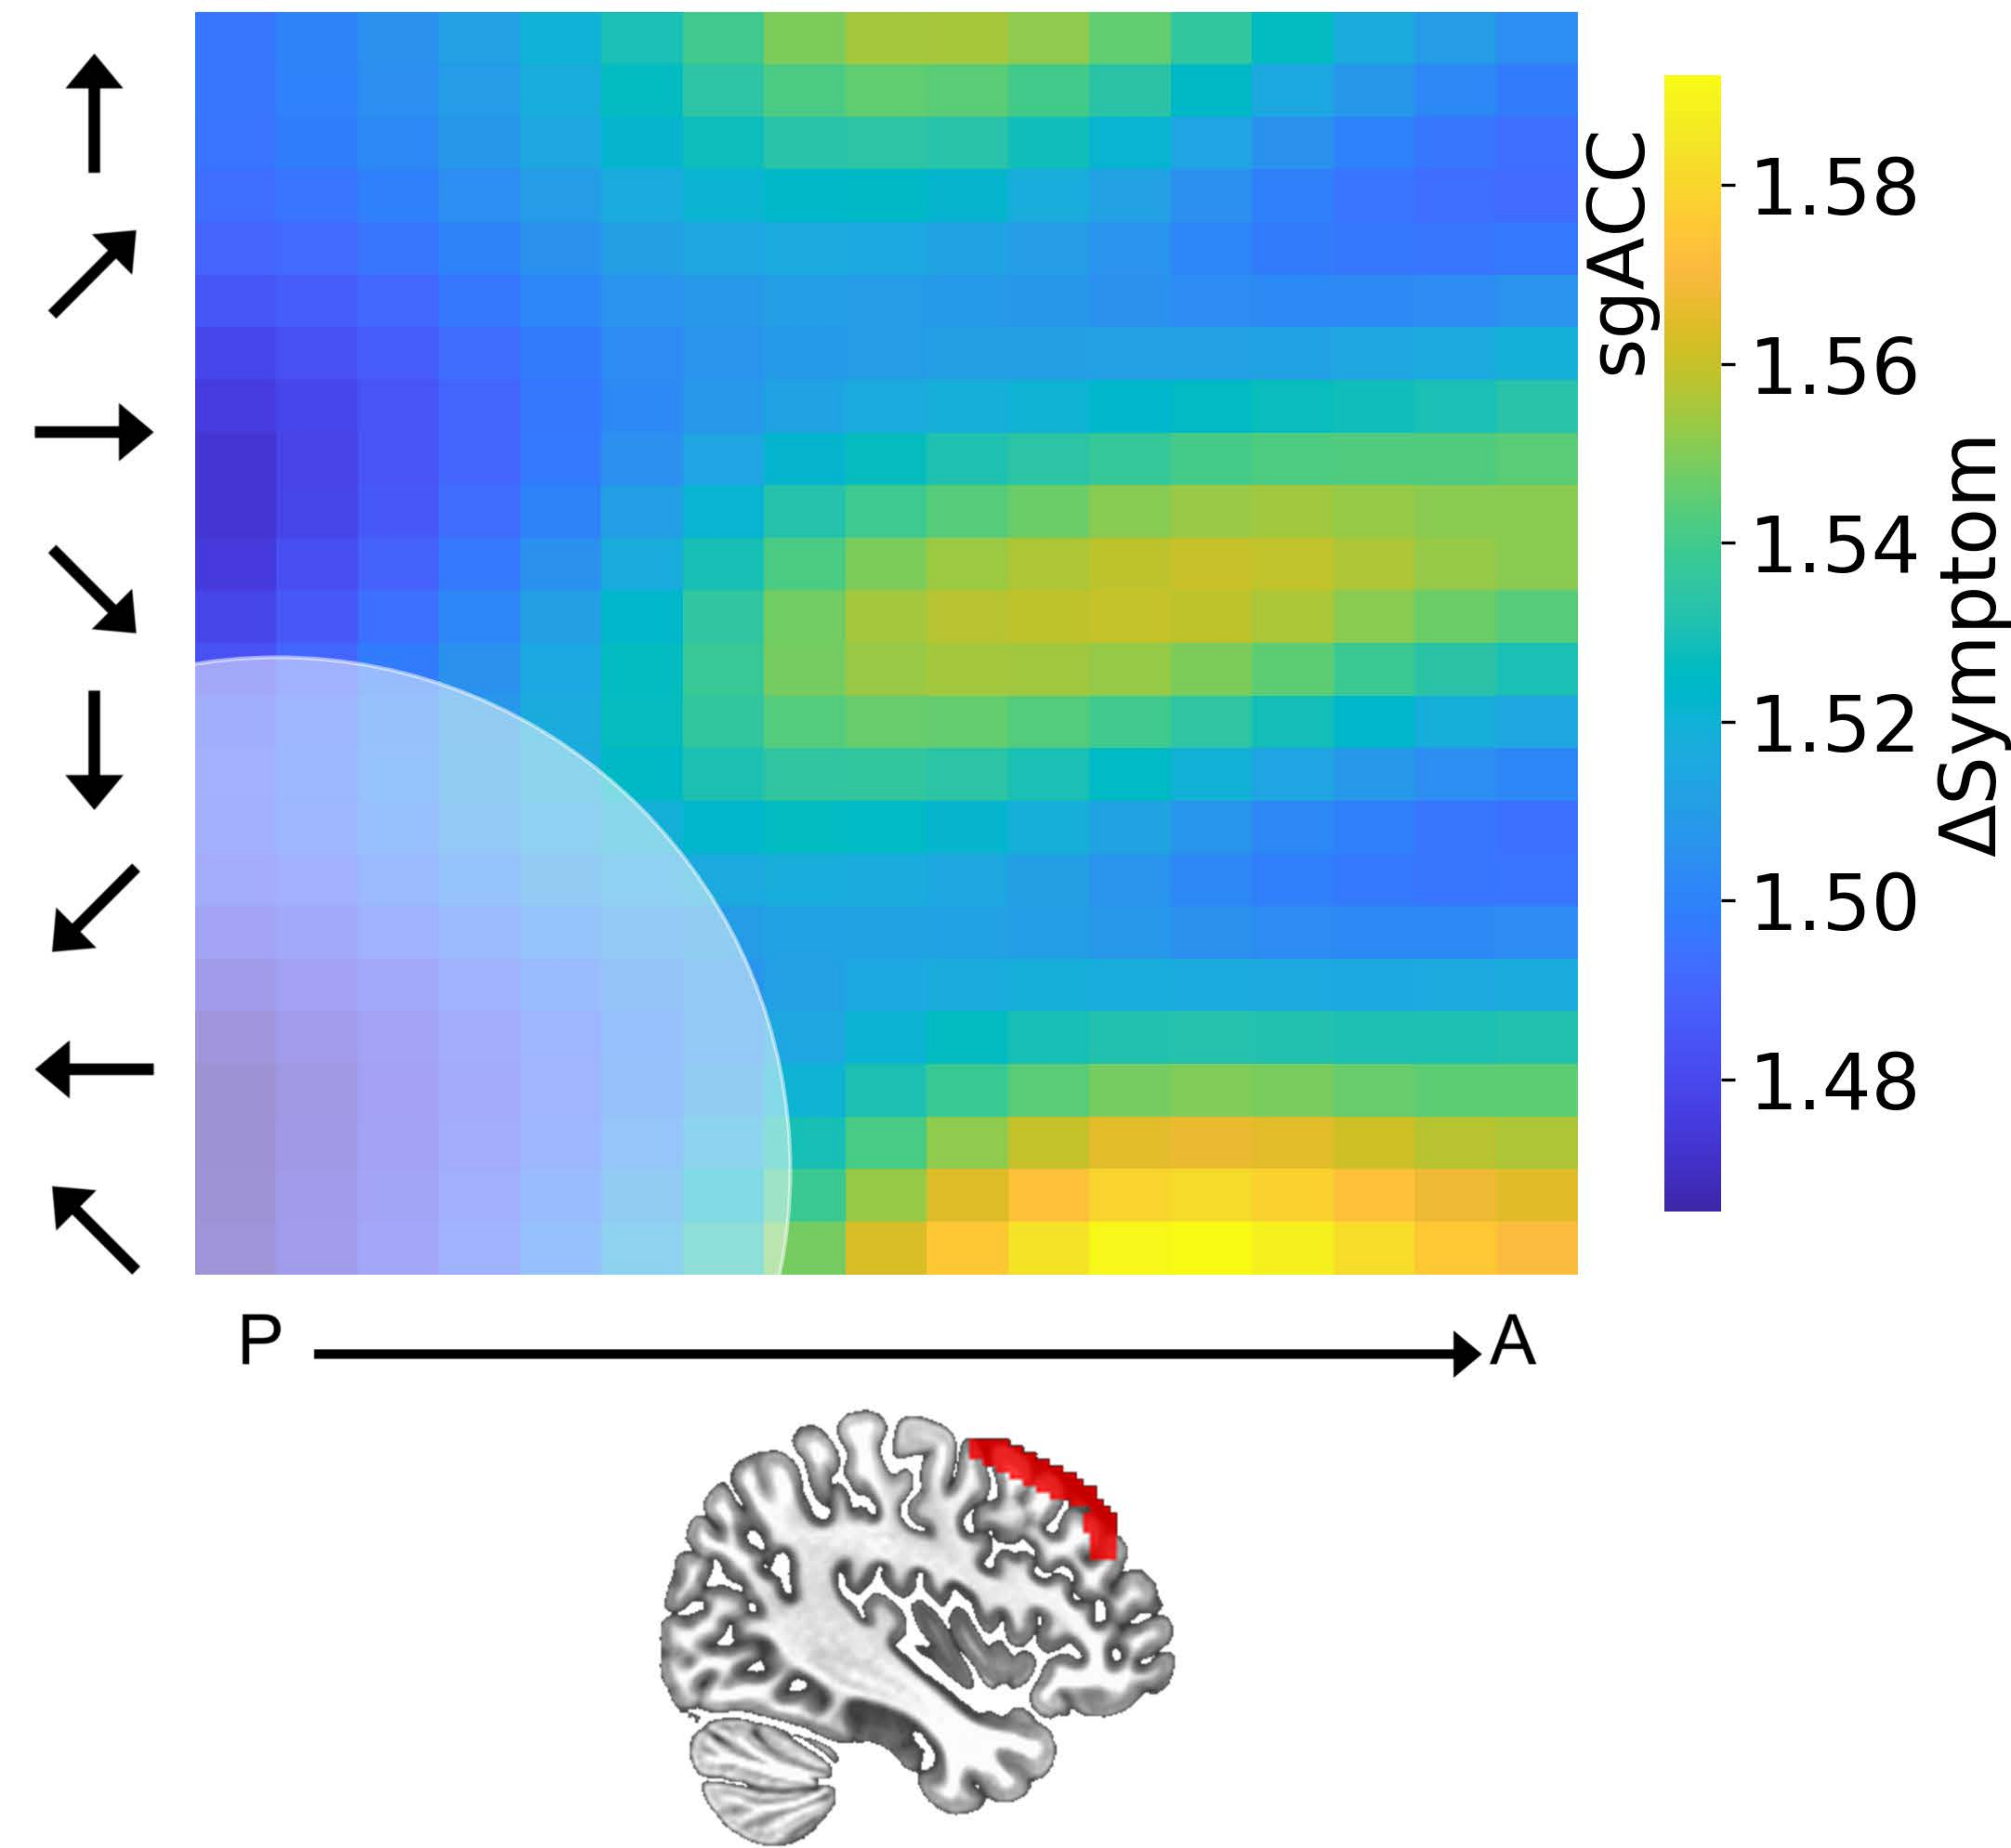



# NDARXU558HYG\_hamd\_right\_dlpfc

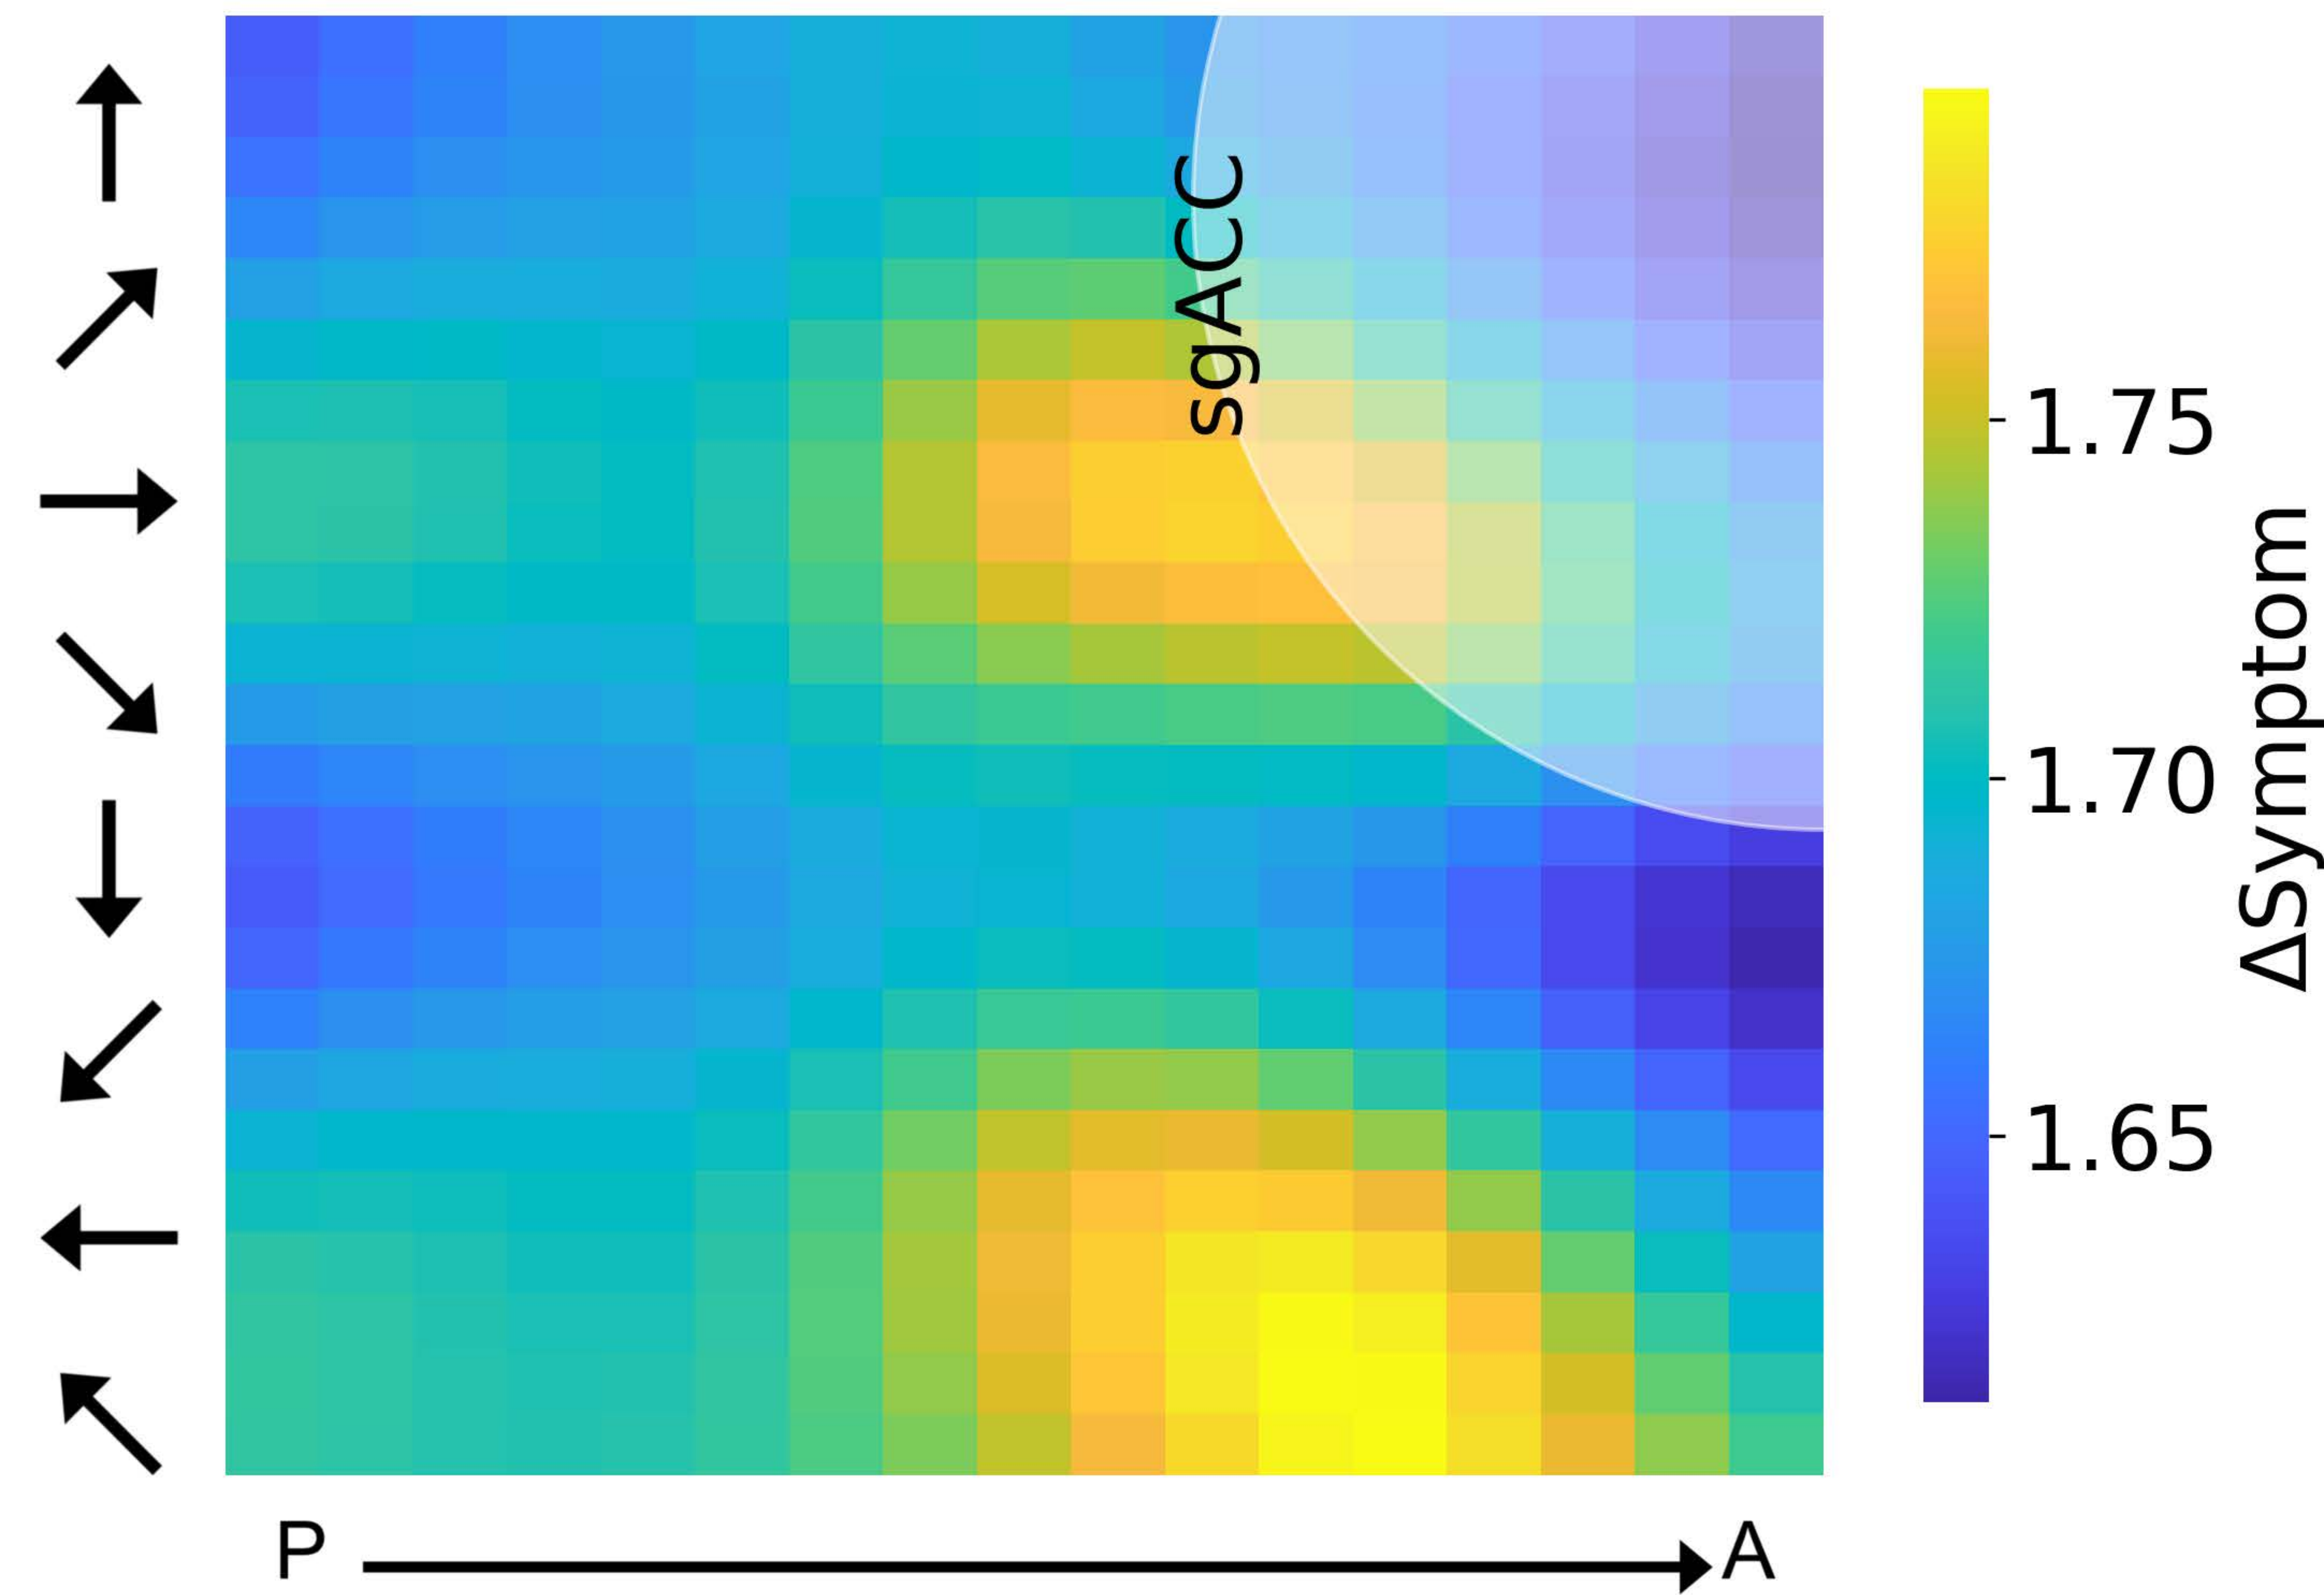



# NDARZW884MZC\_hamd\_right\_dlpfc

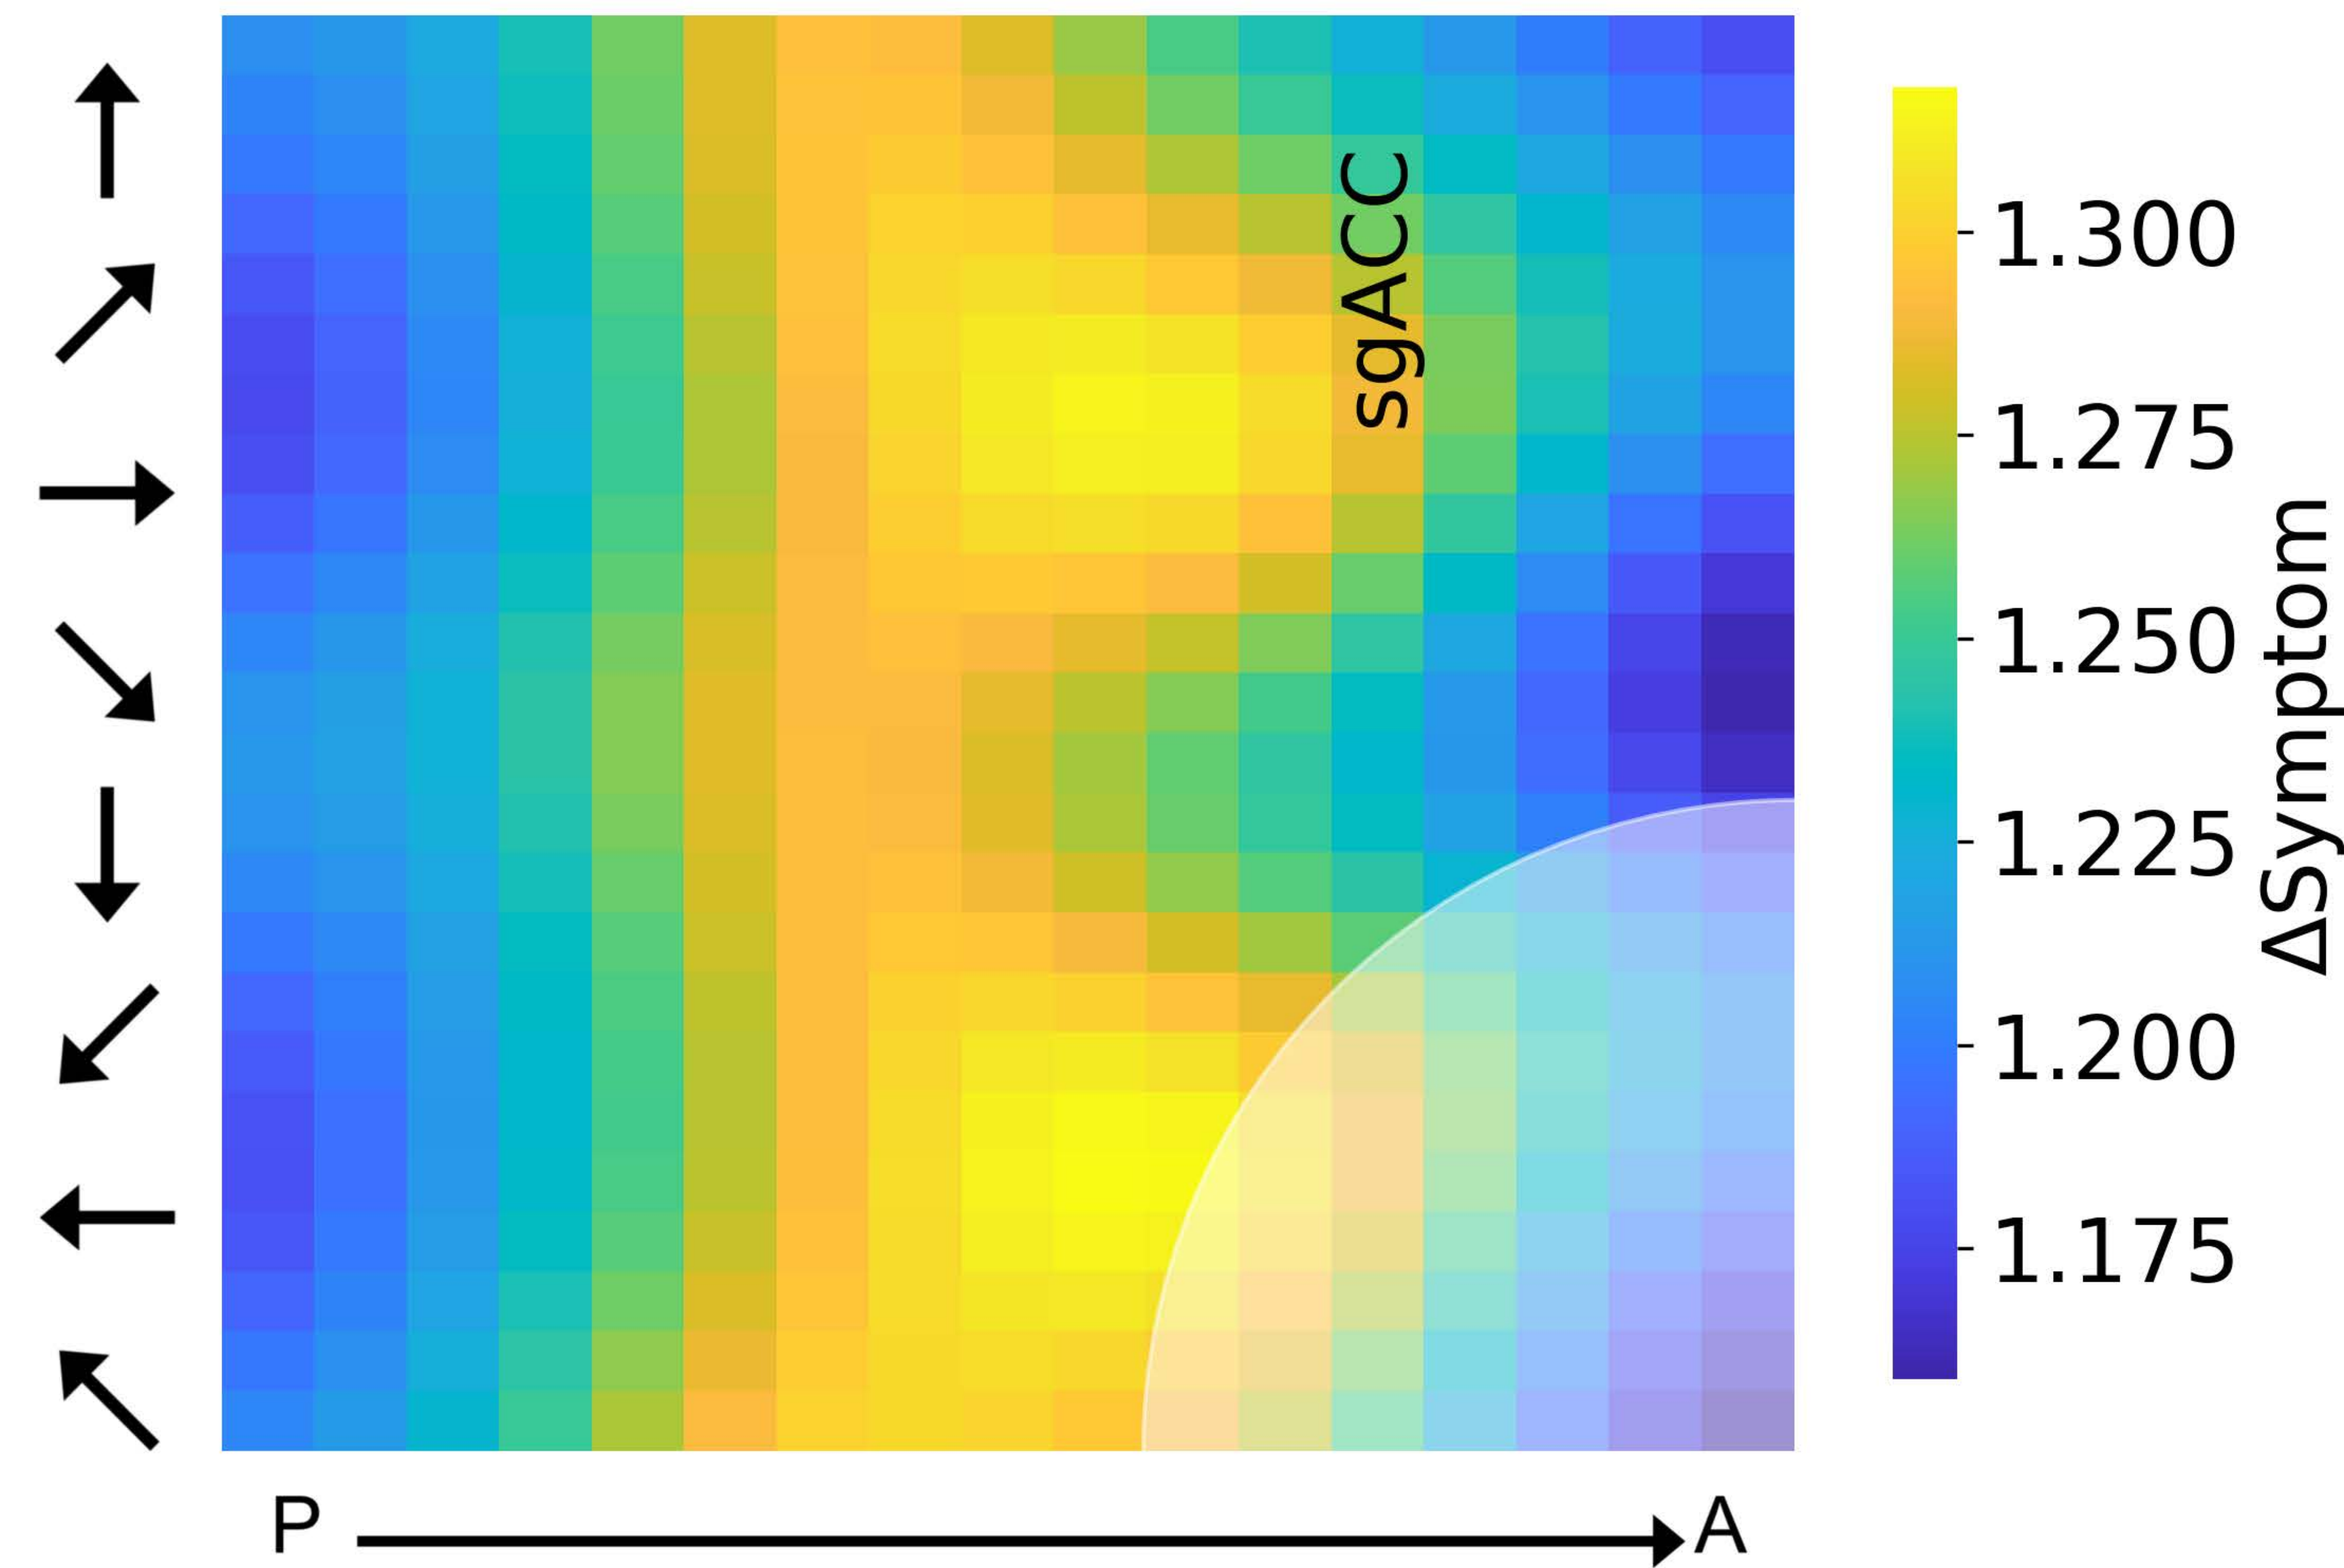

Supplement: 41386_2021_1110_MOESM1_ESM.pdf [file 41386_2021_1110_MOESM1_ESM.pdf]
